# Supplementary material for: Predictive performance of international COVID-19 mortality forecasting models
Source: bioRxiv or medRxiv preprint supplement (doi:10.1101/2020.07.13.20151233), 2020-11-19

# United States – Smoothed Daily Deaths

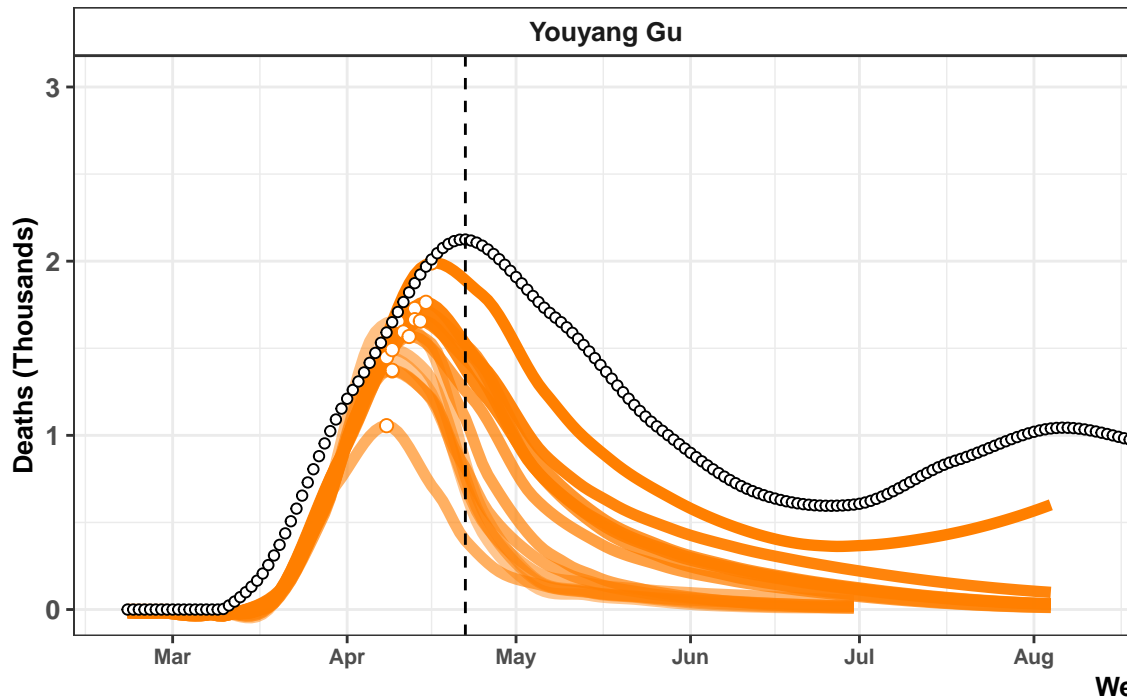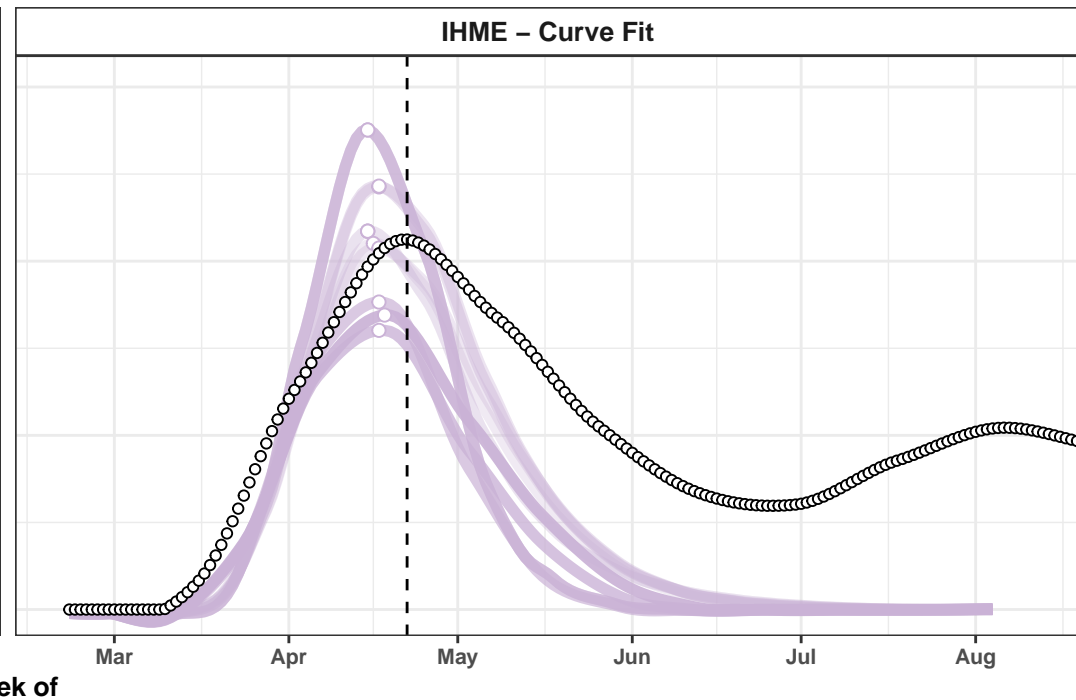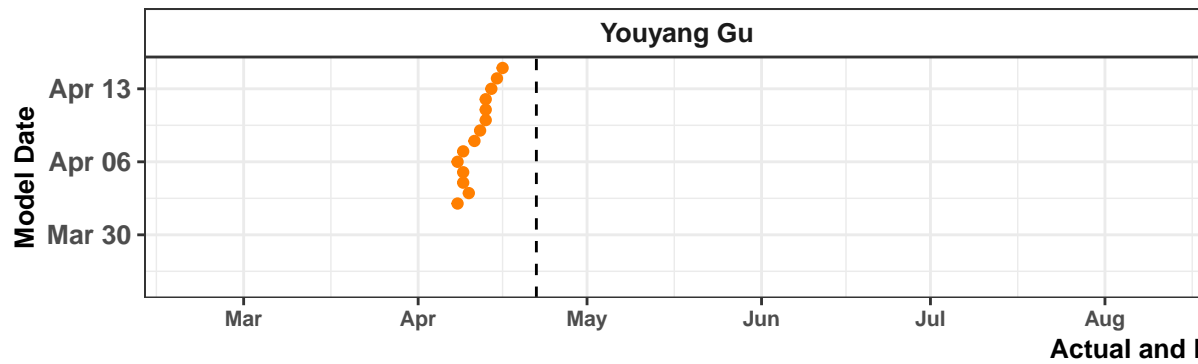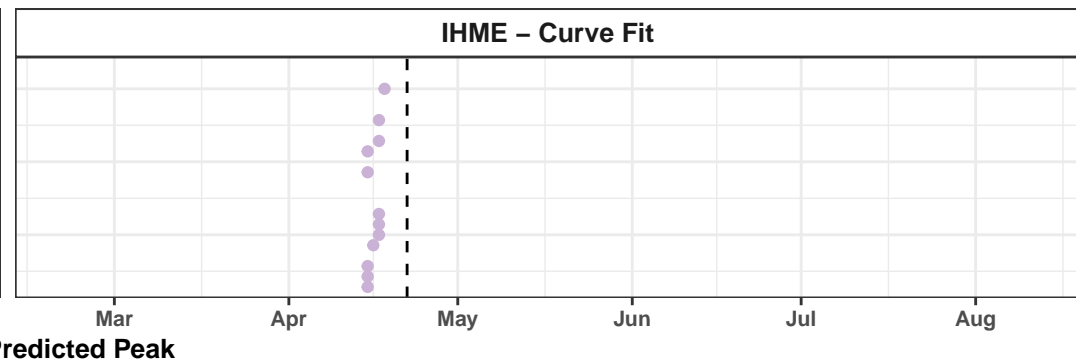

# Brazil – Smoothed Daily Deaths

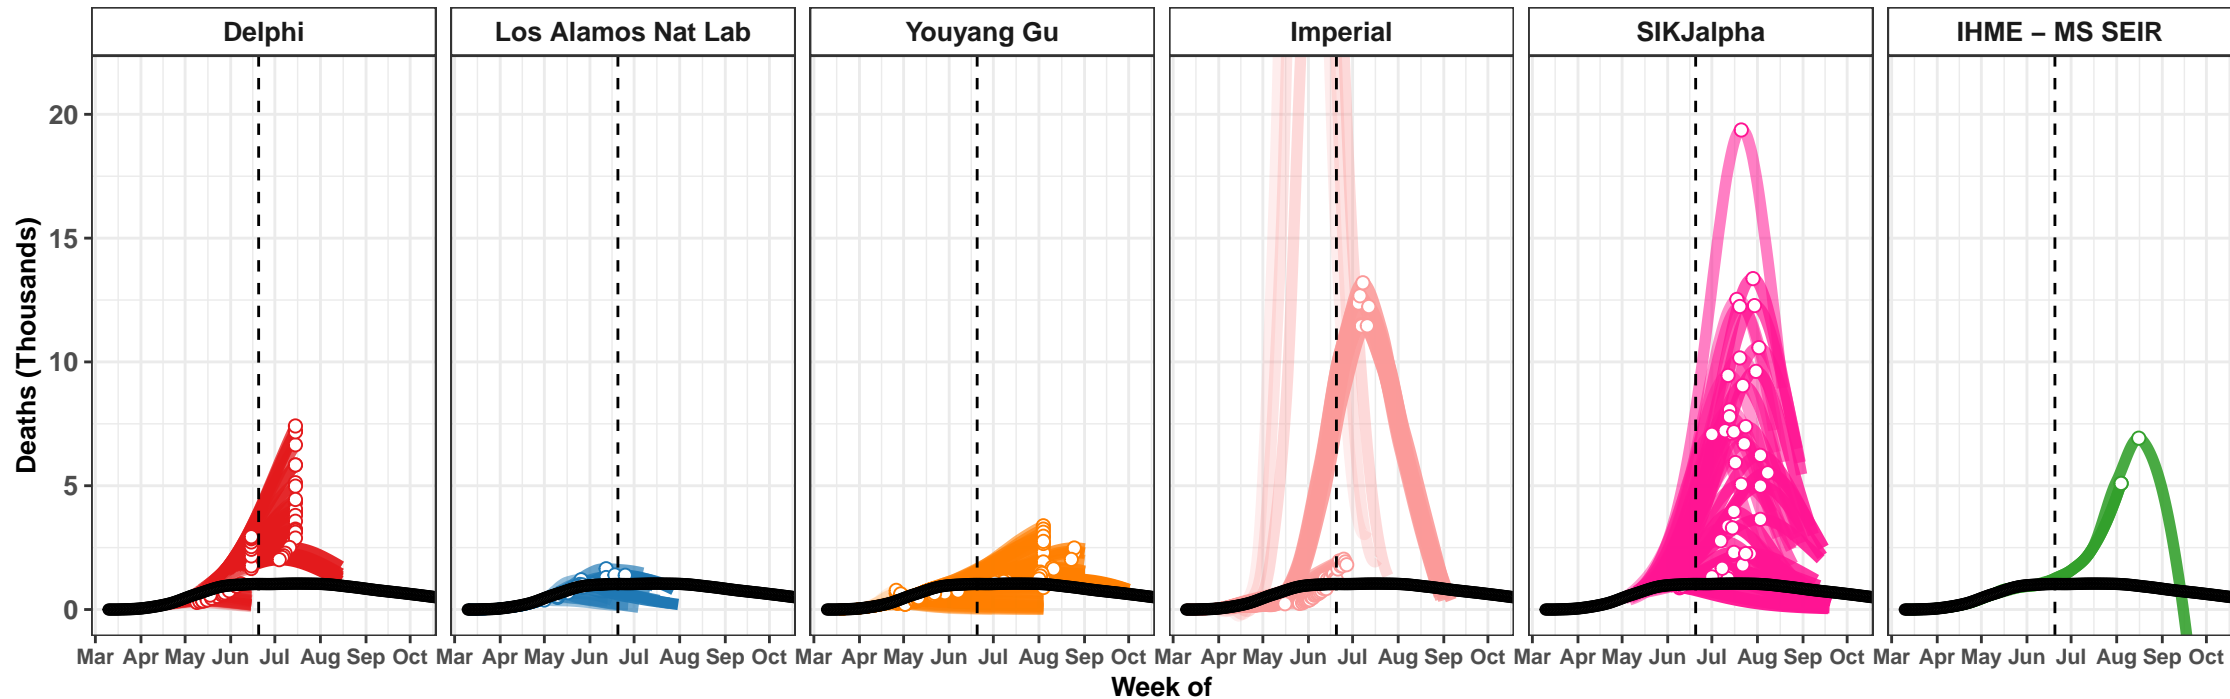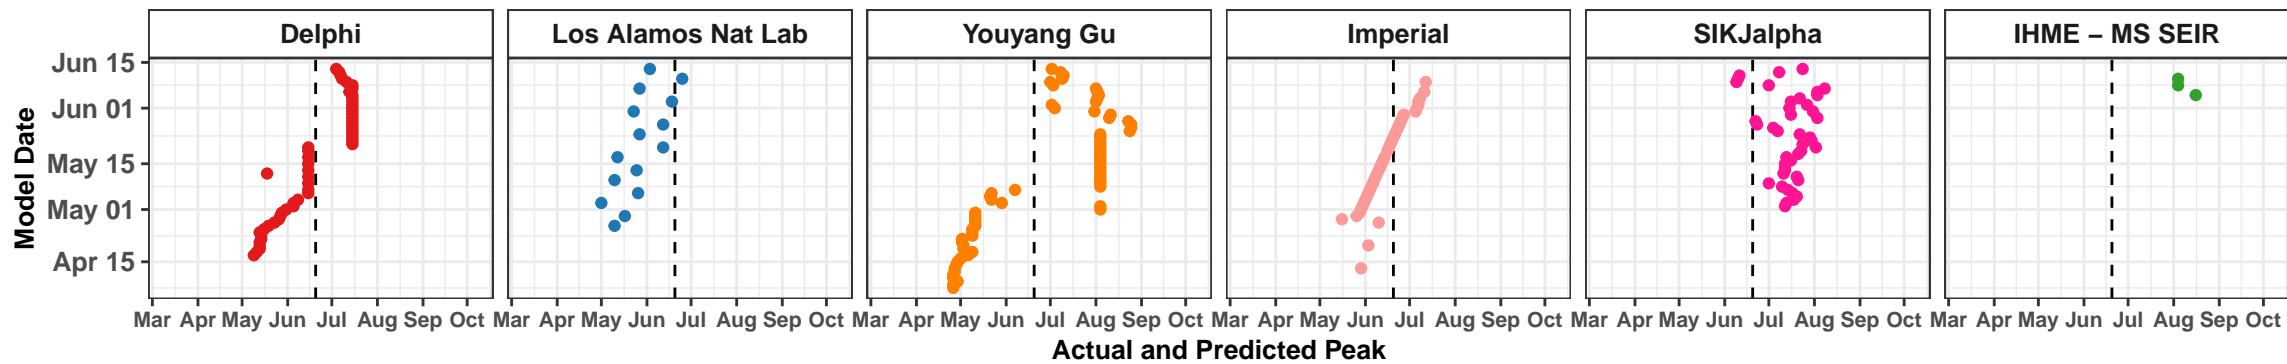

# India – Smoothed Daily Deaths

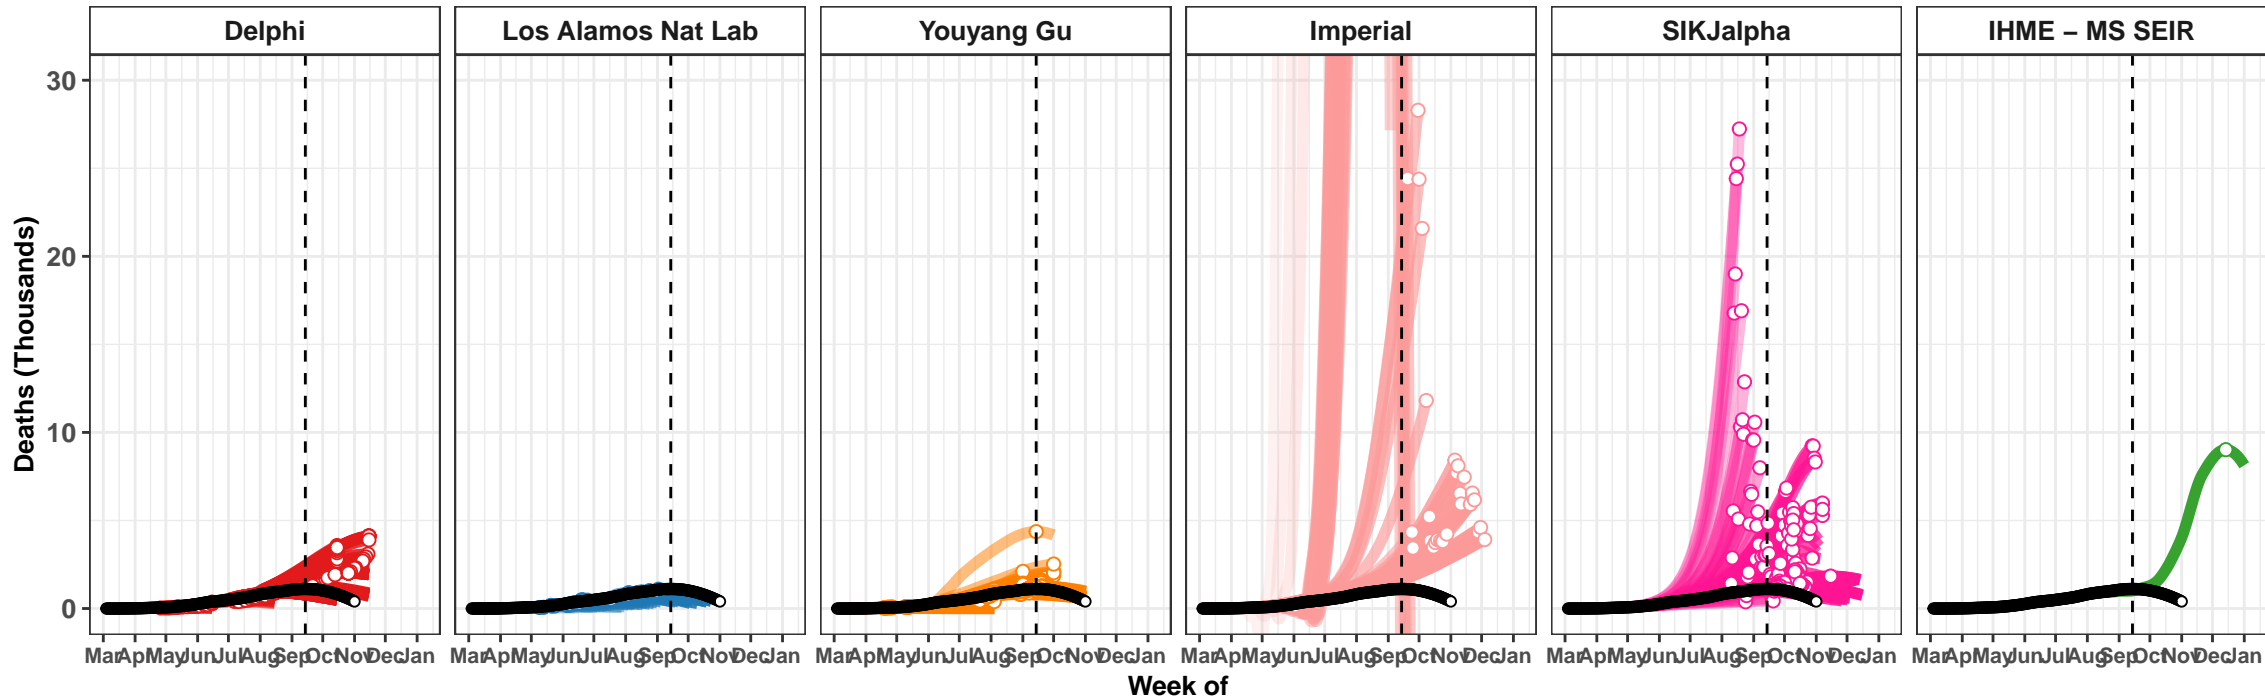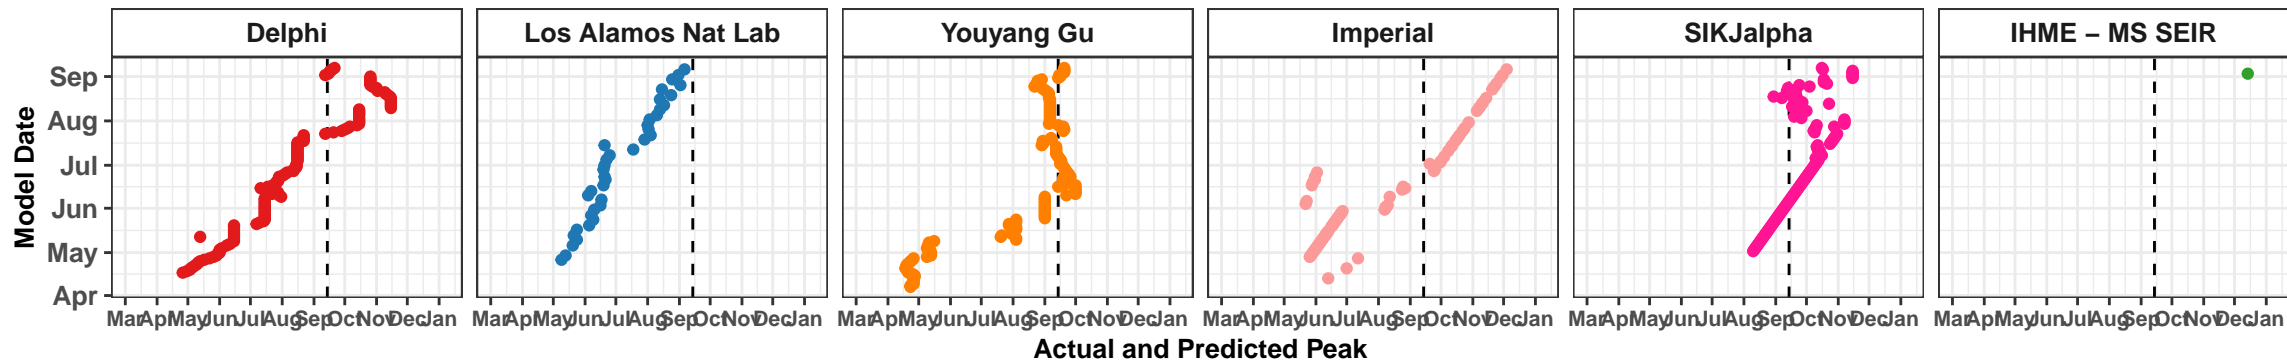

# Mexico – Smoothed Daily Deaths

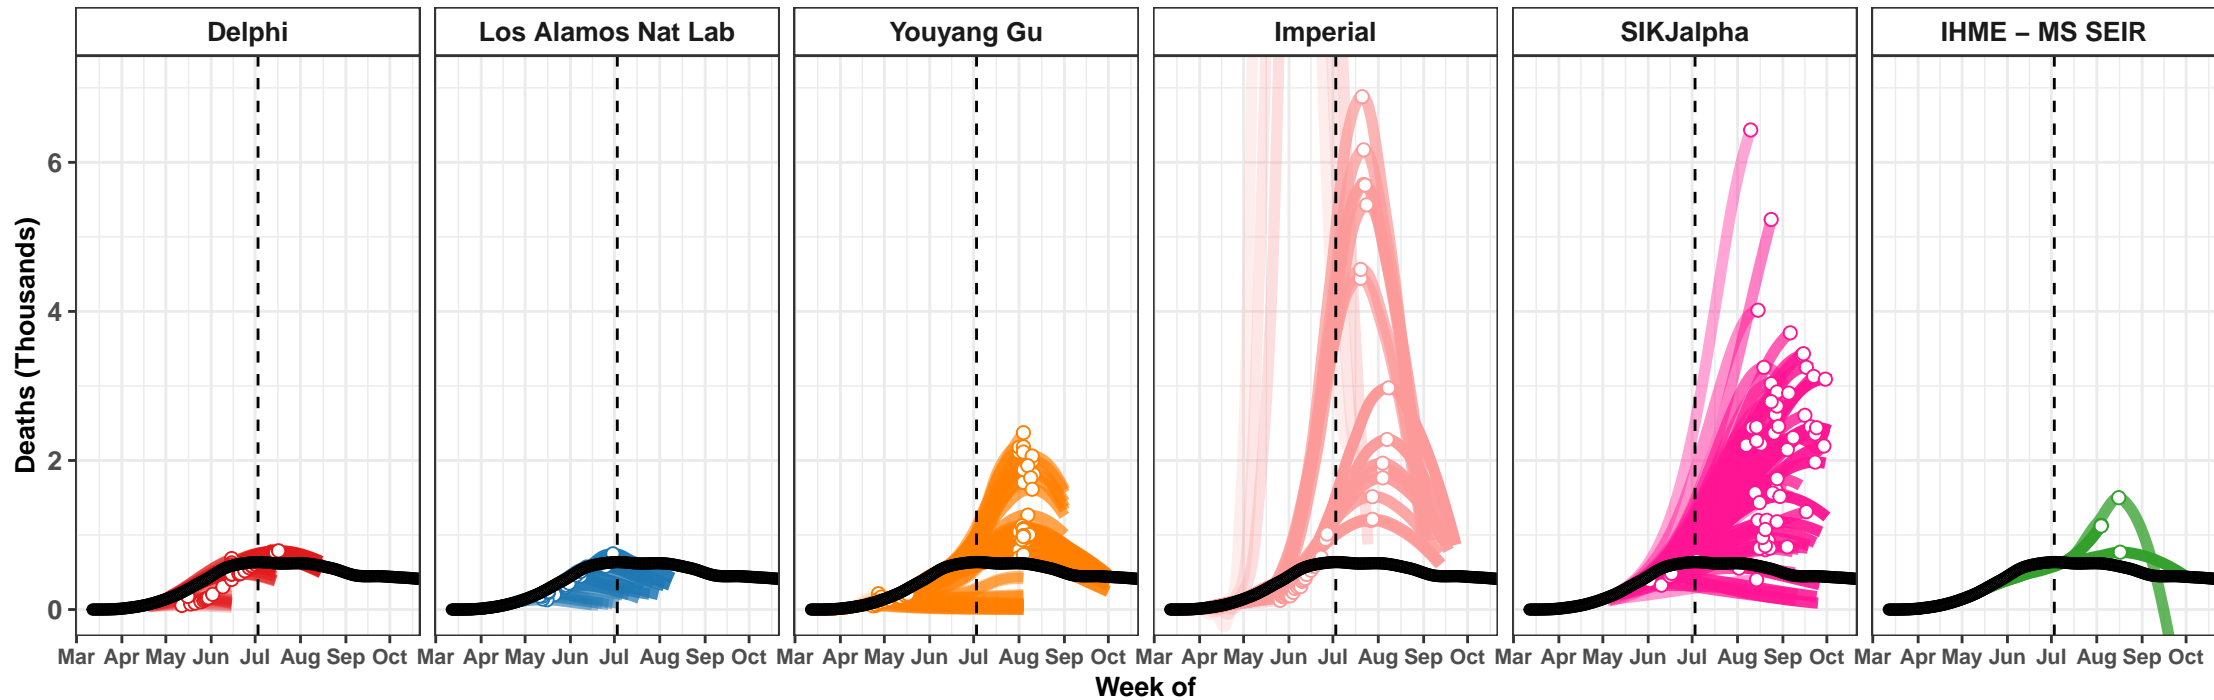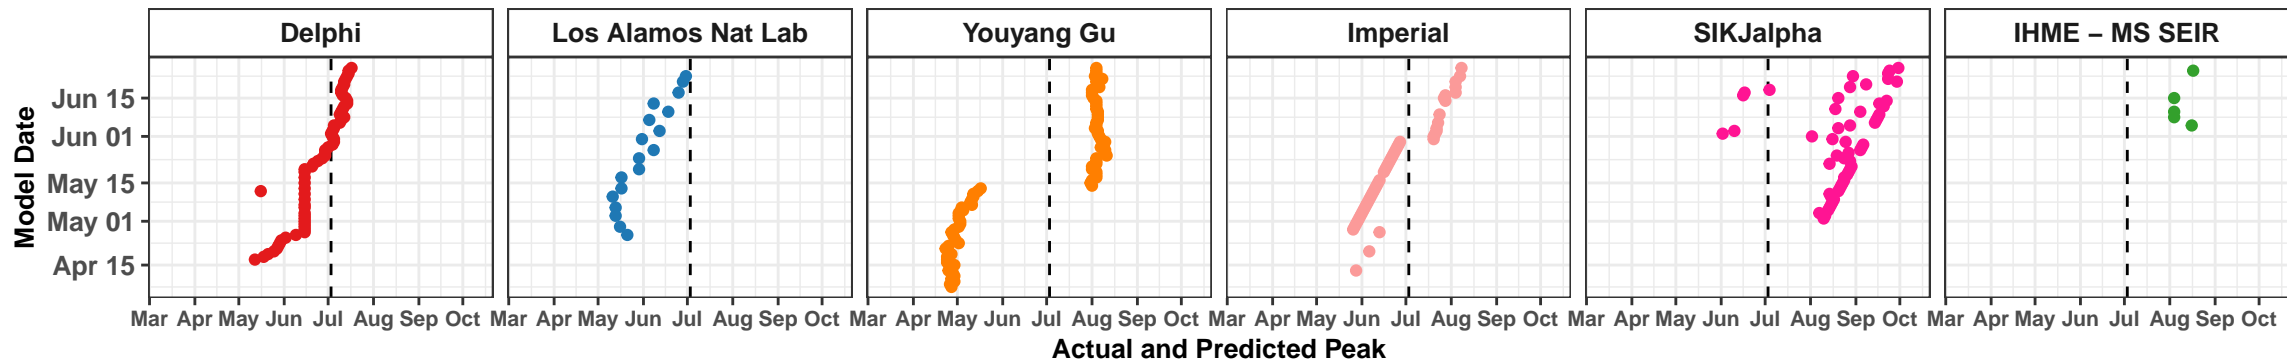

# United Kingdom – Smoothed Daily Deaths

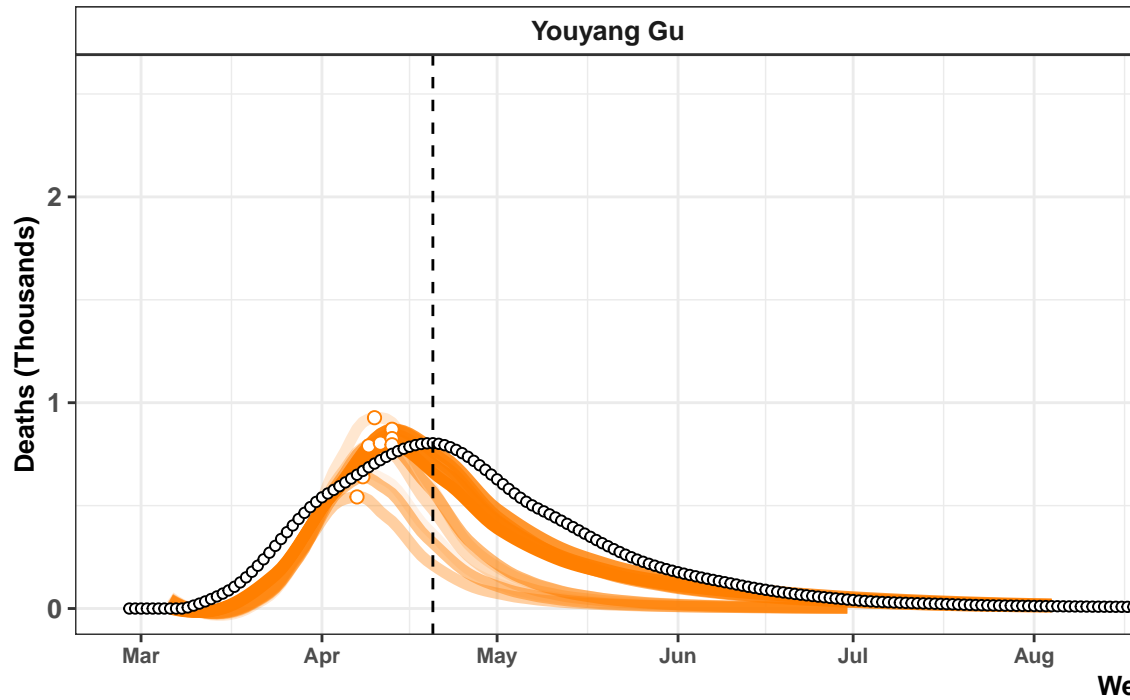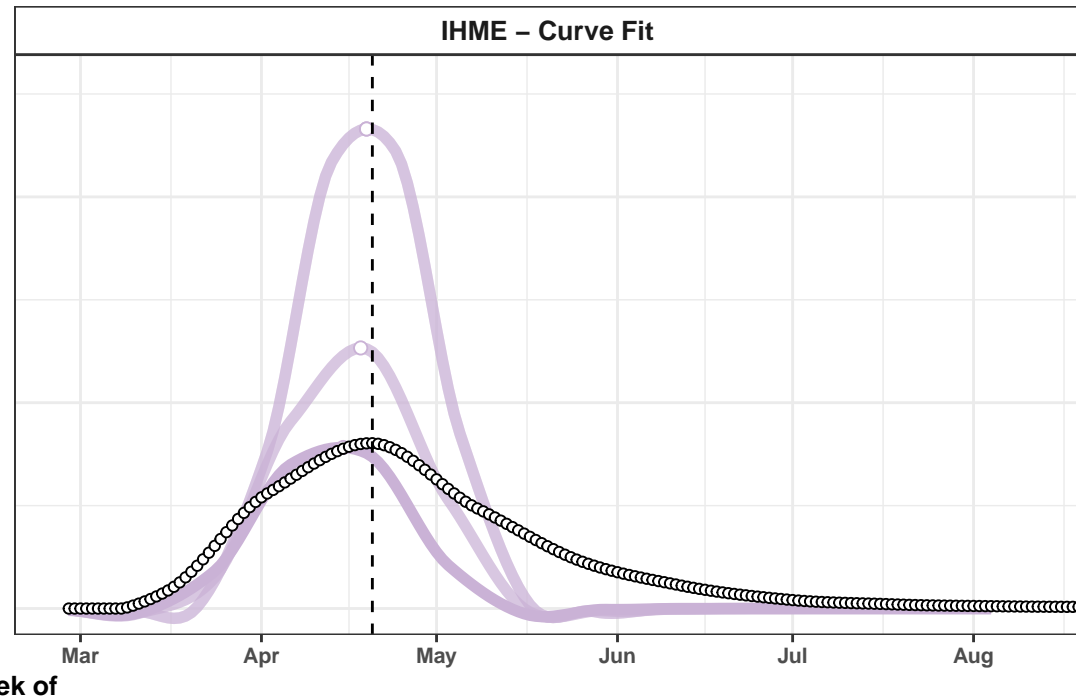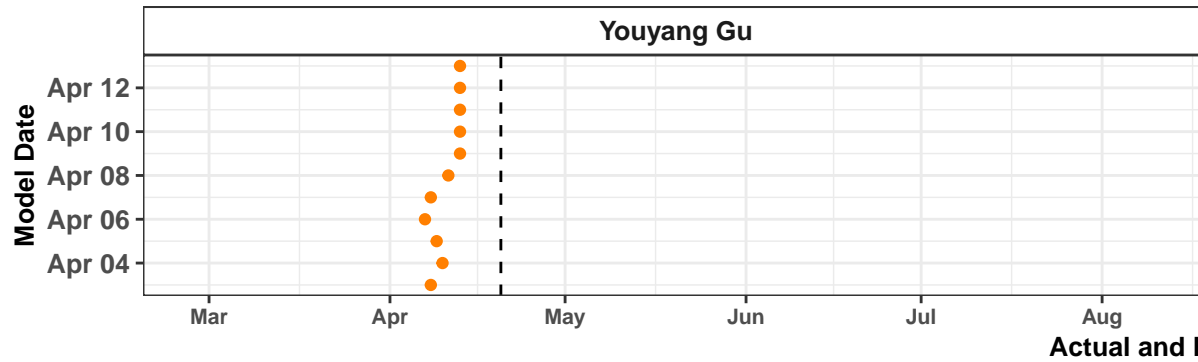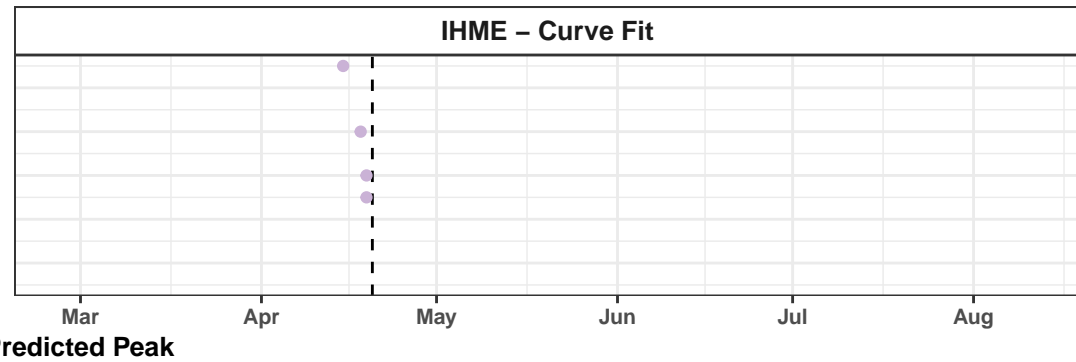

# France – Smoothed Daily Deaths

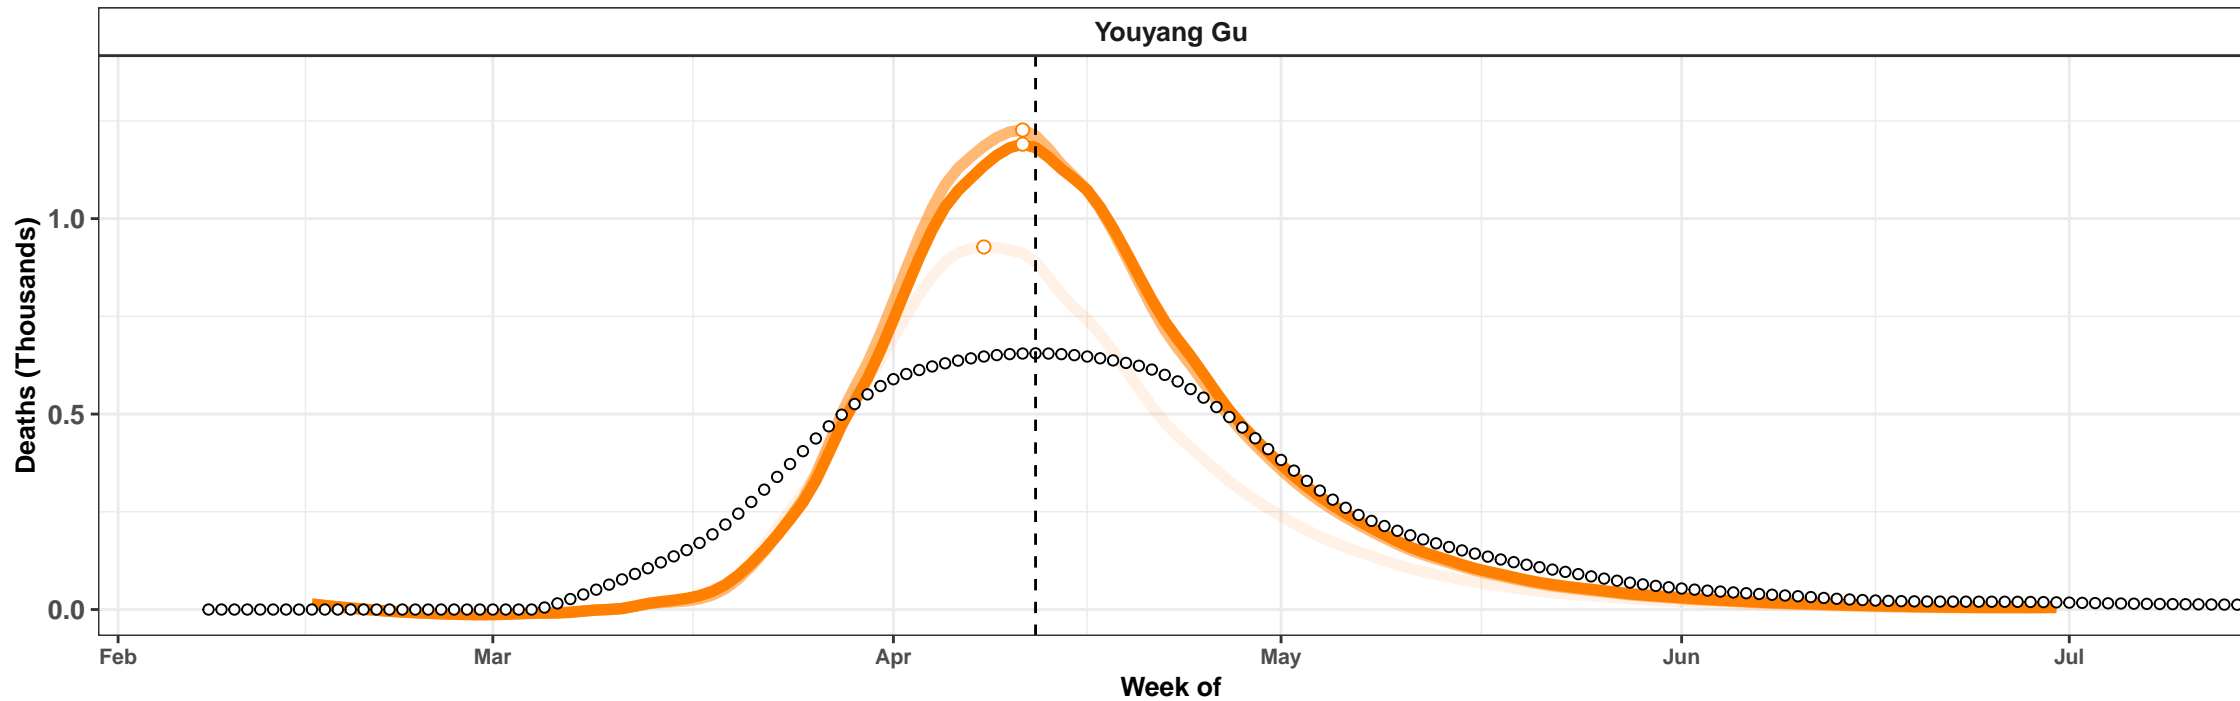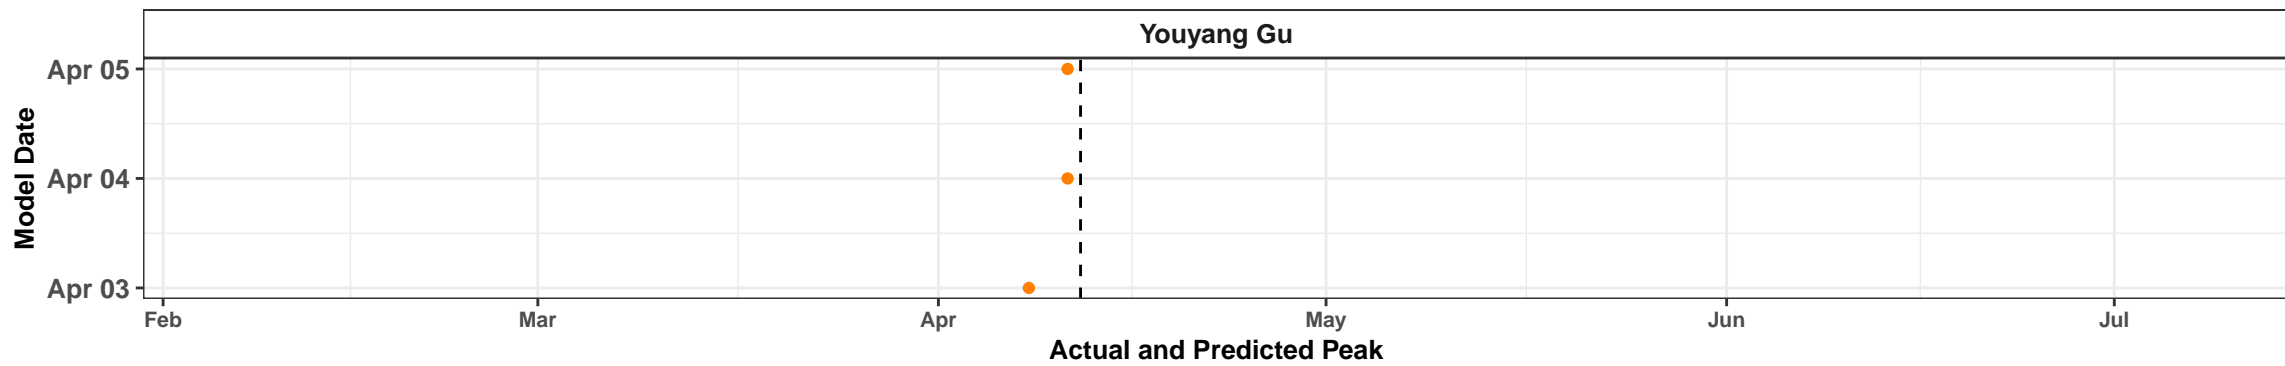

# Peru – Smoothed Daily Deaths

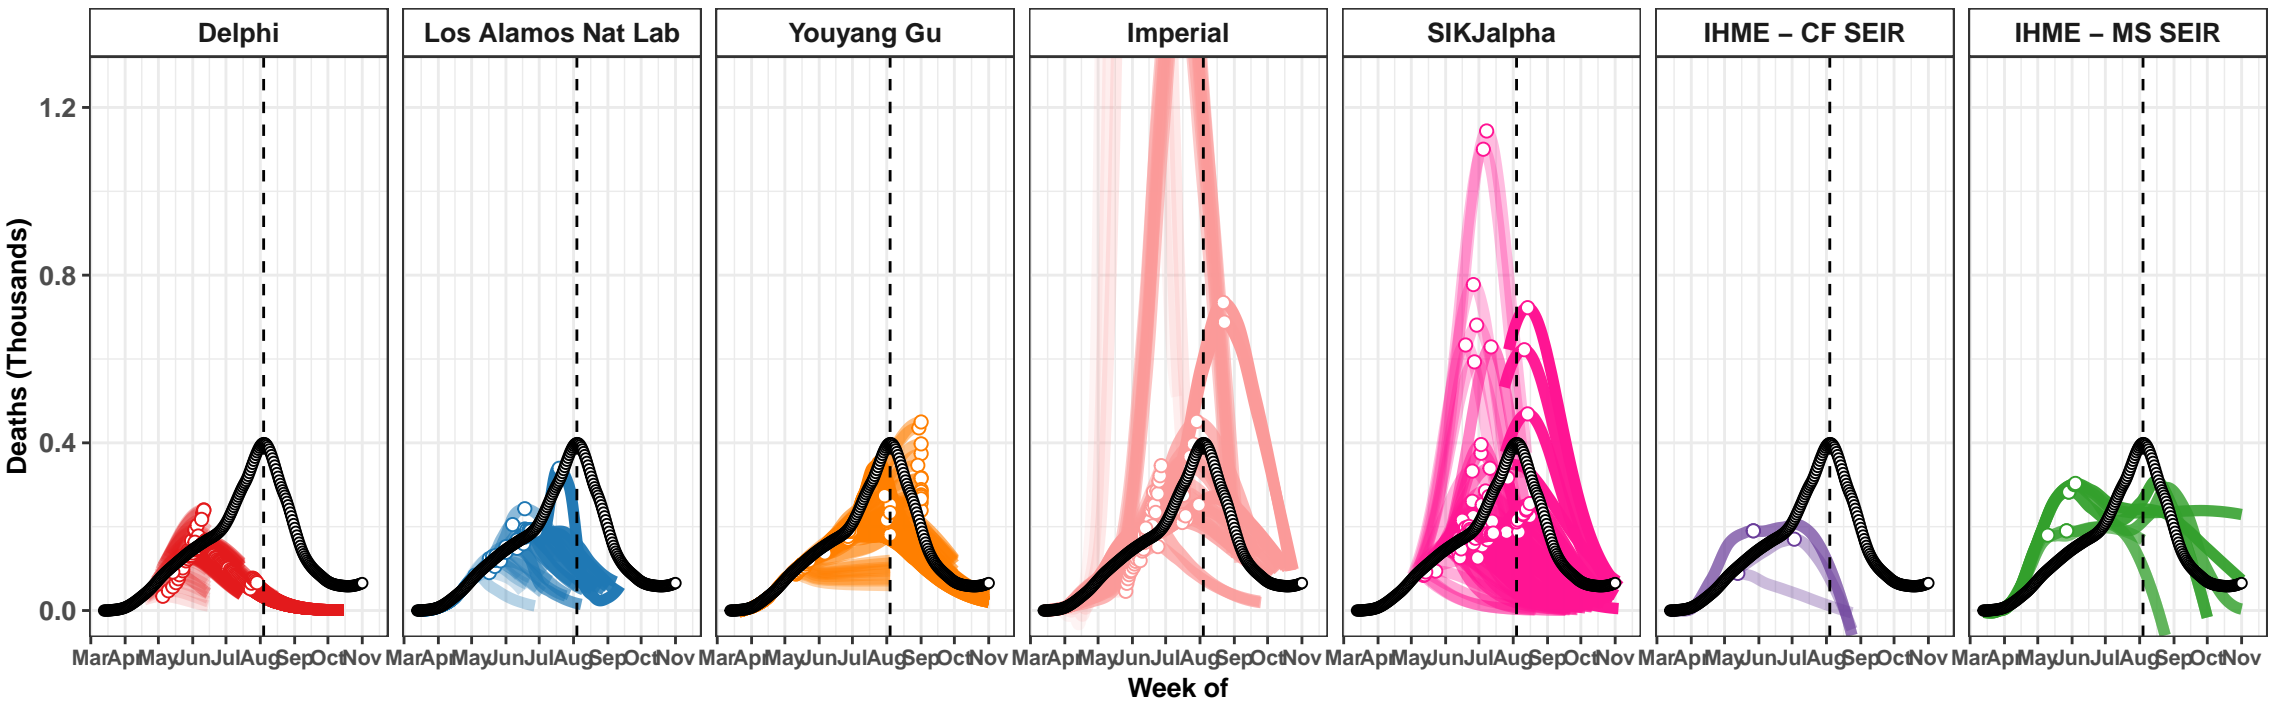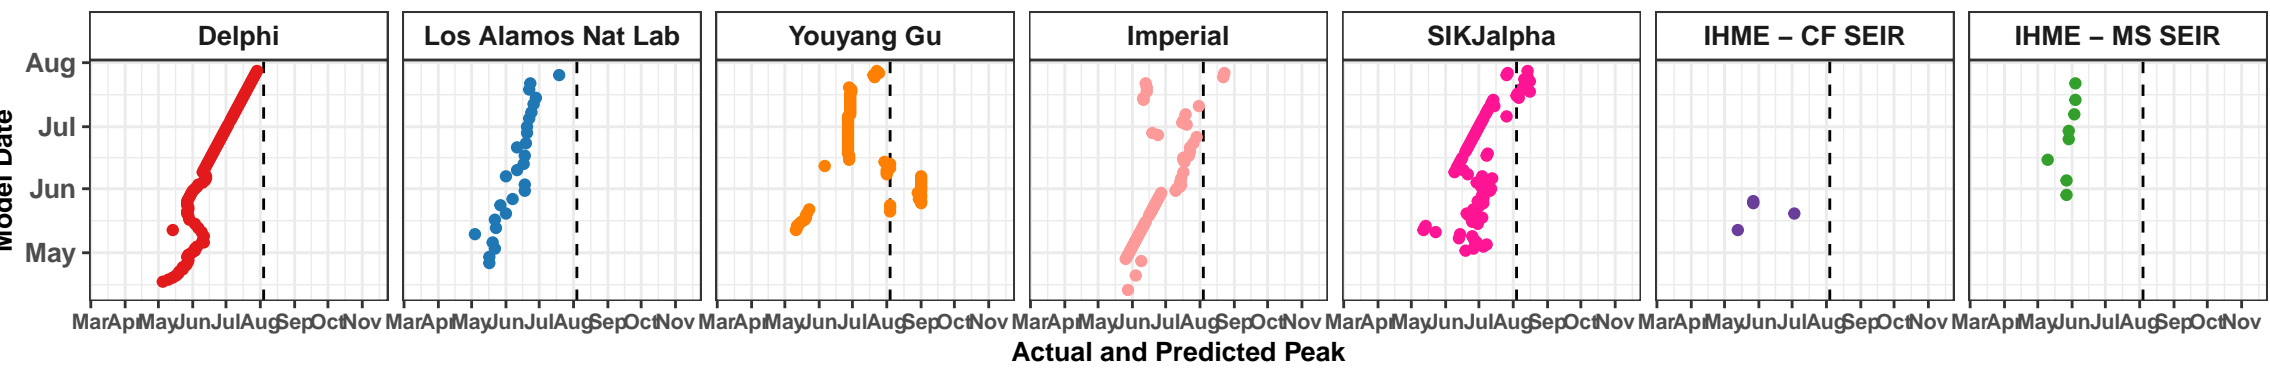

# New York – Smoothed Daily Deaths

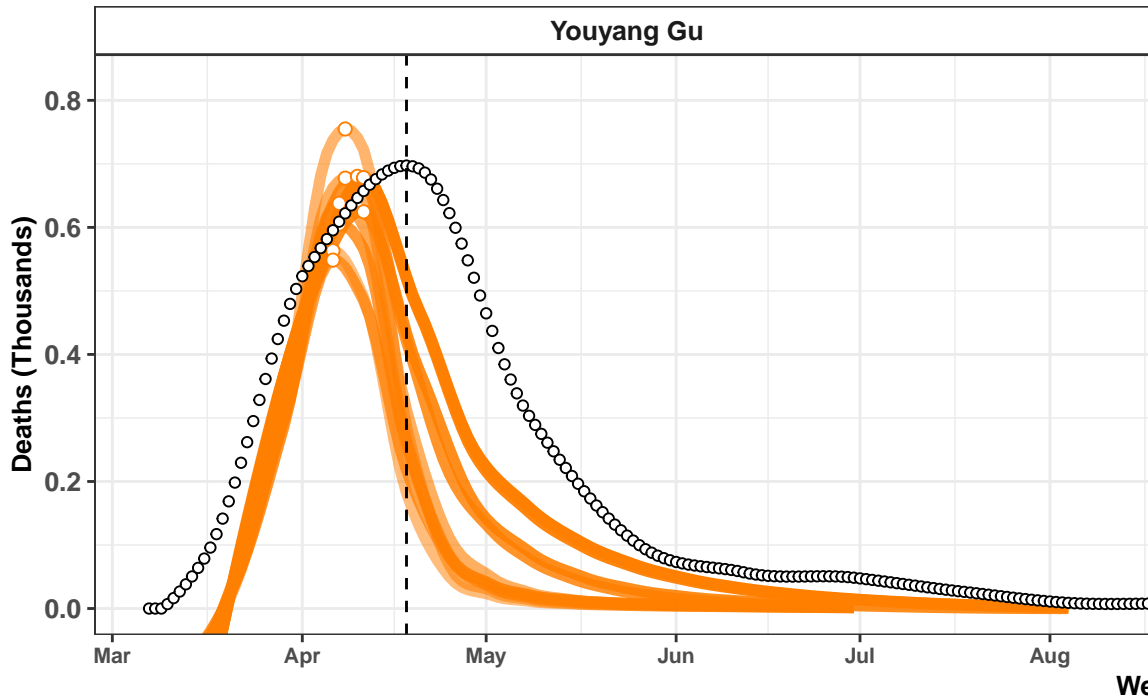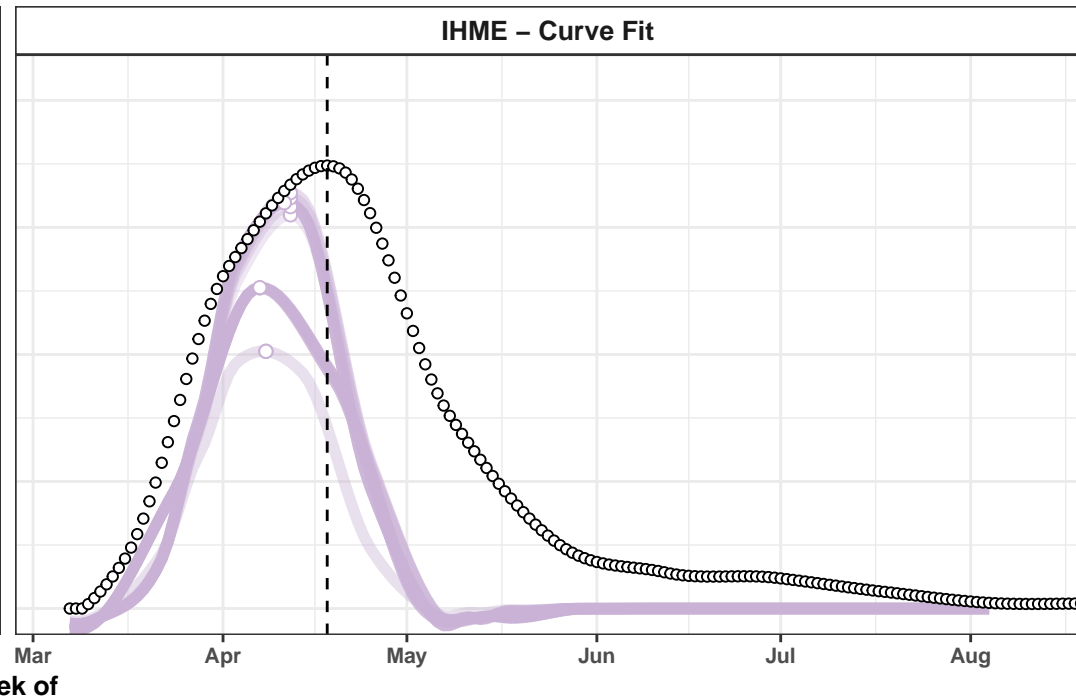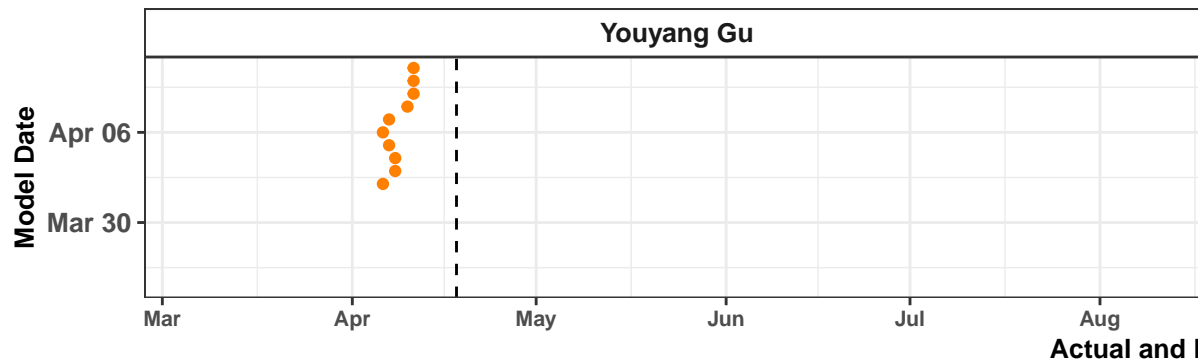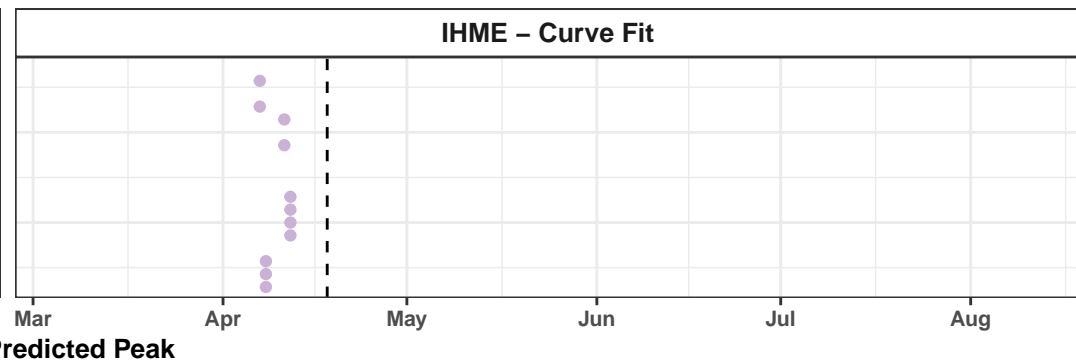



# Colombia – Smoothed Daily Deaths

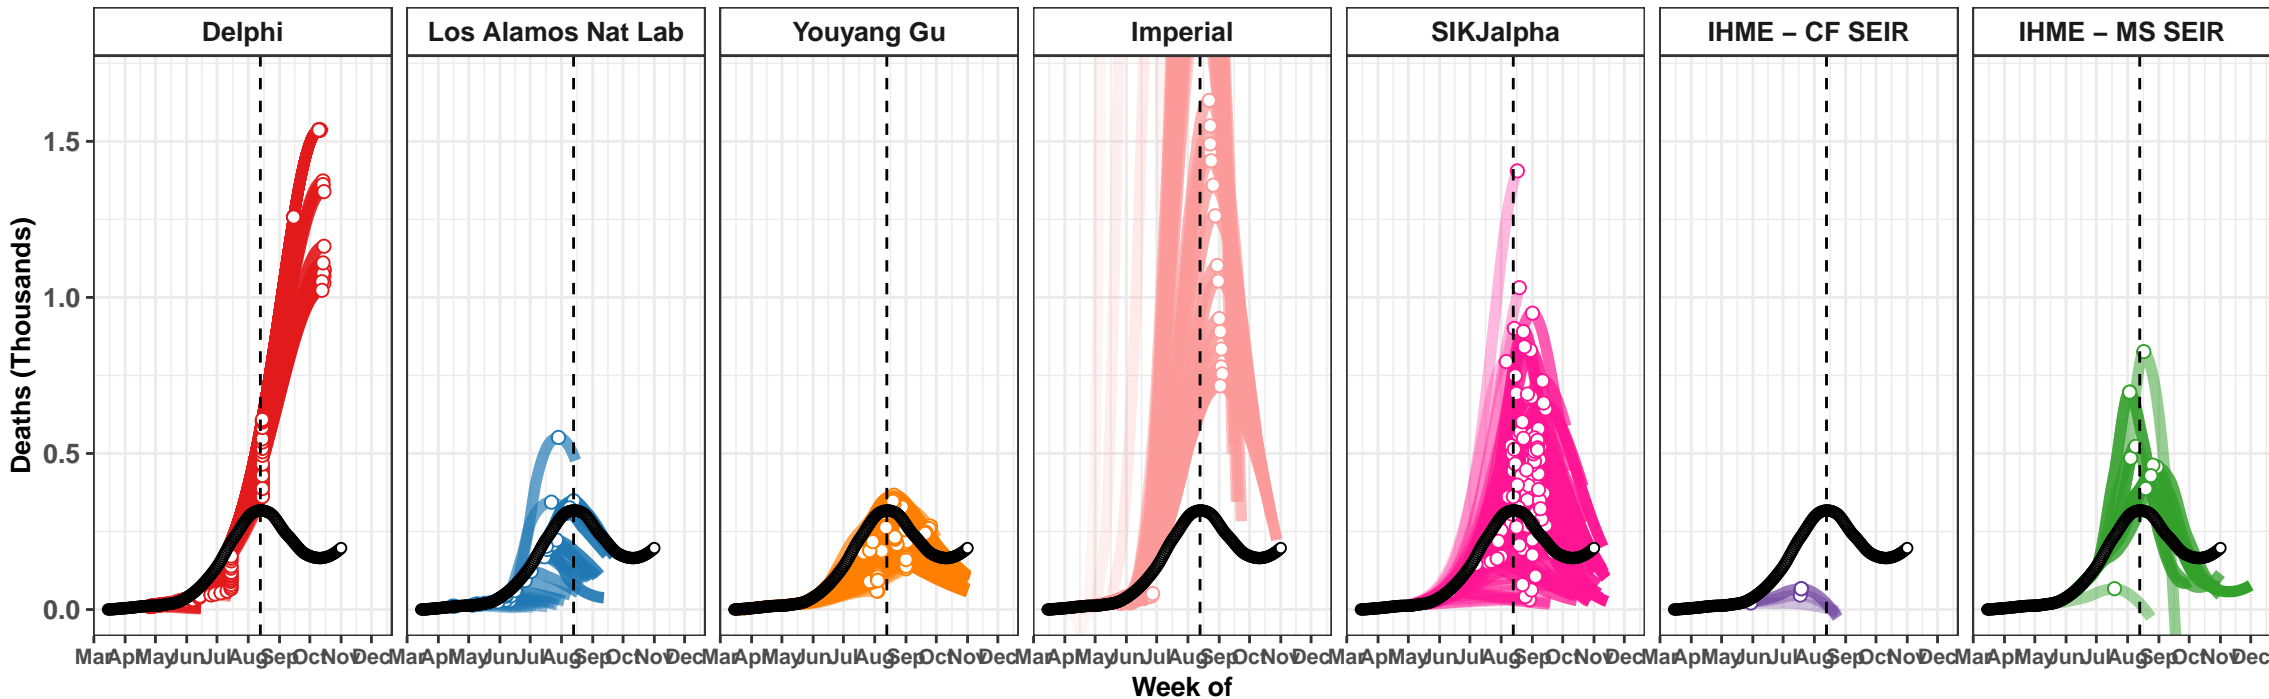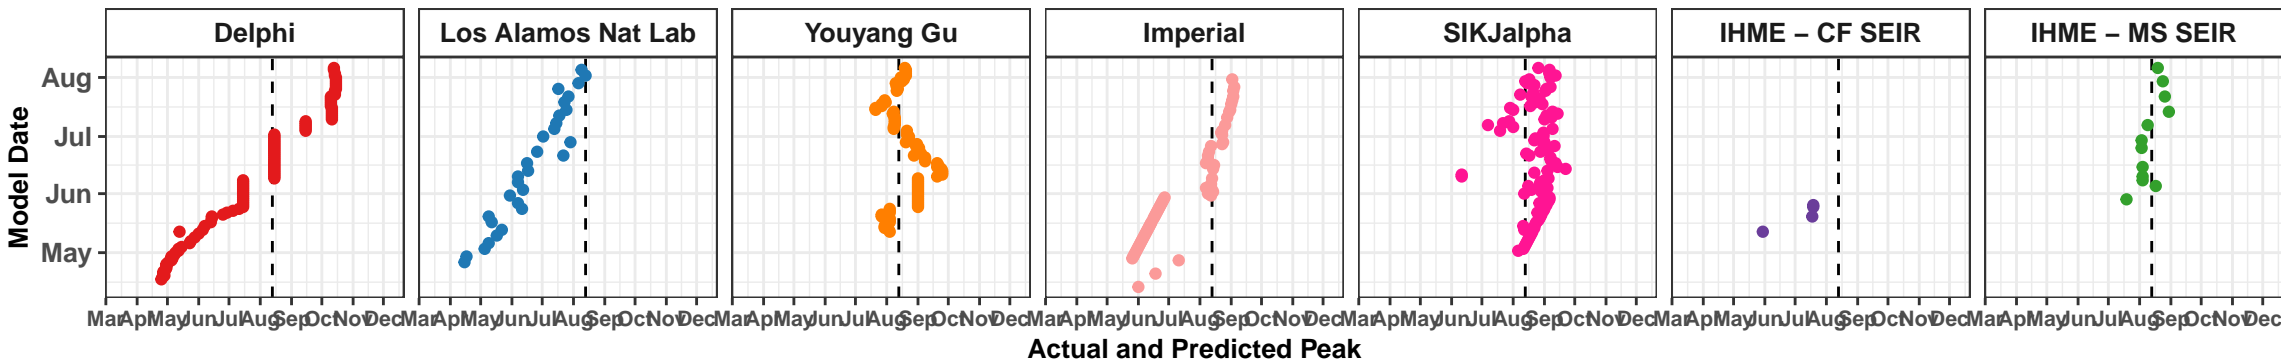

# Argentina – Smoothed Daily Deaths

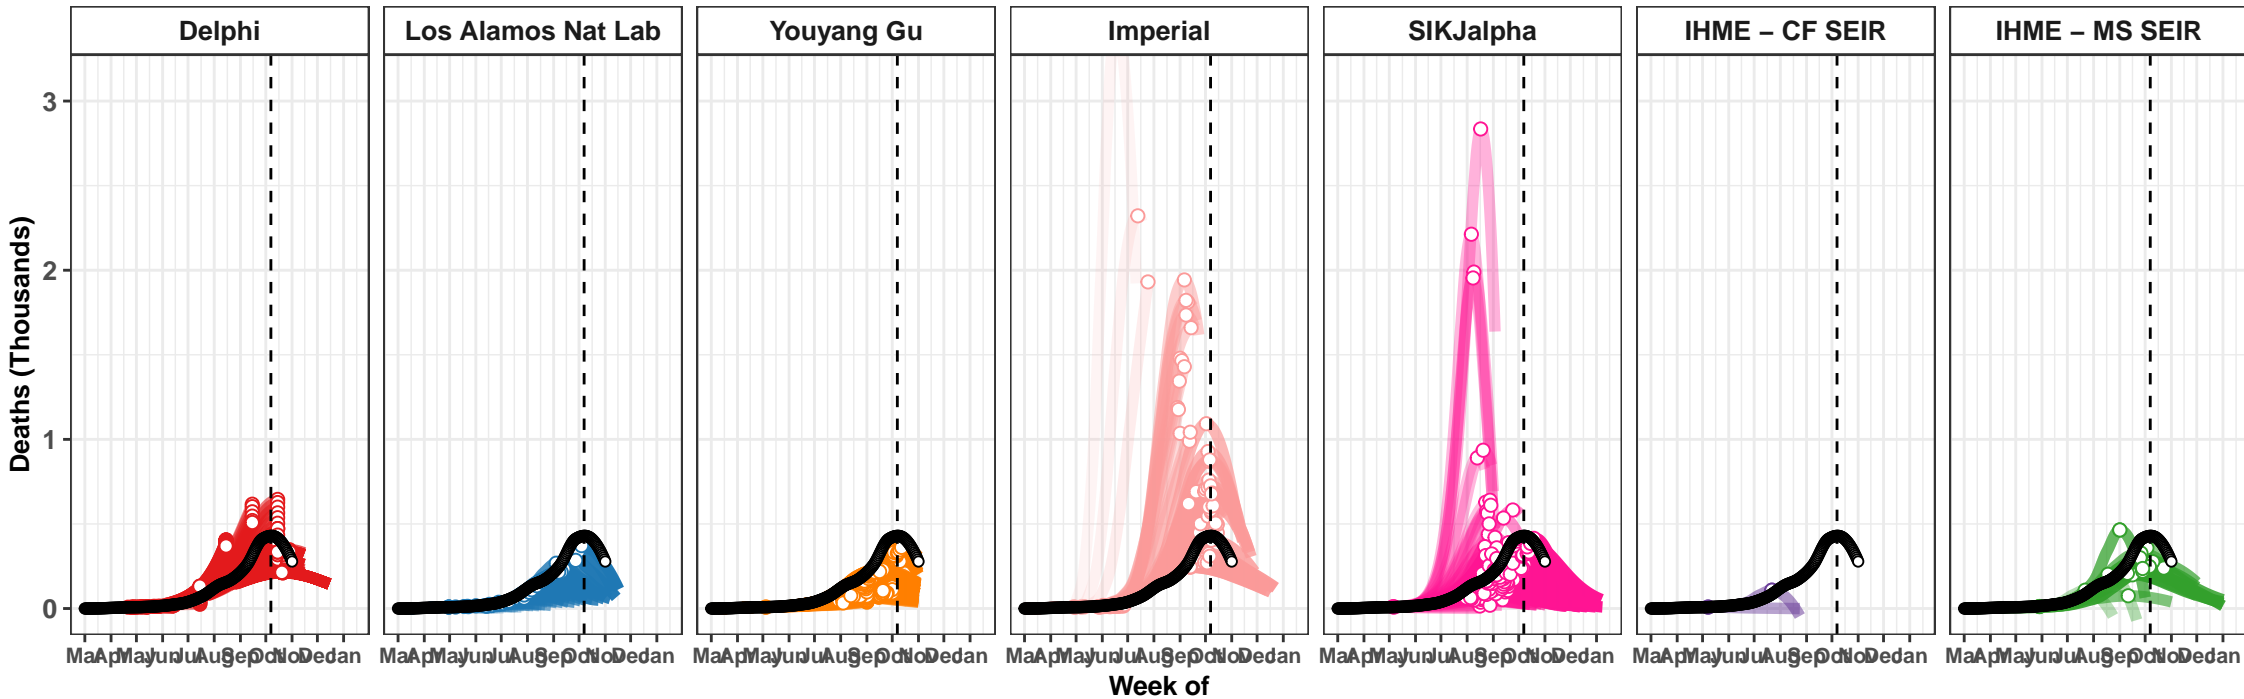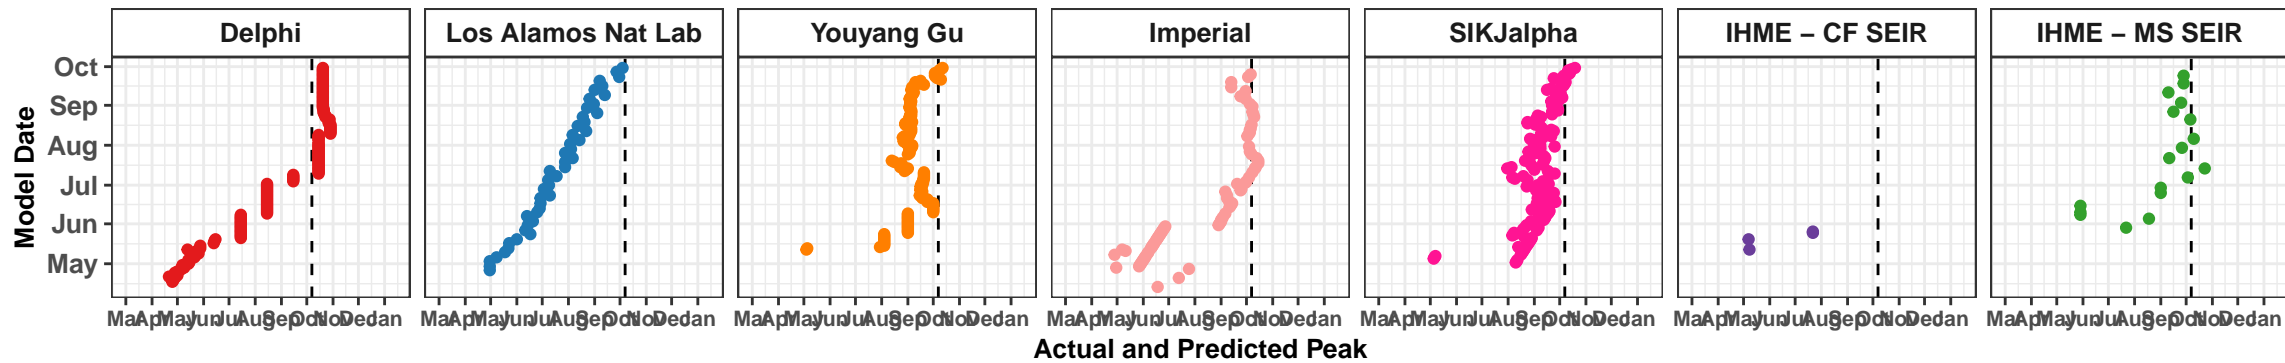

# Russian Federation – Smoothed Daily Deaths

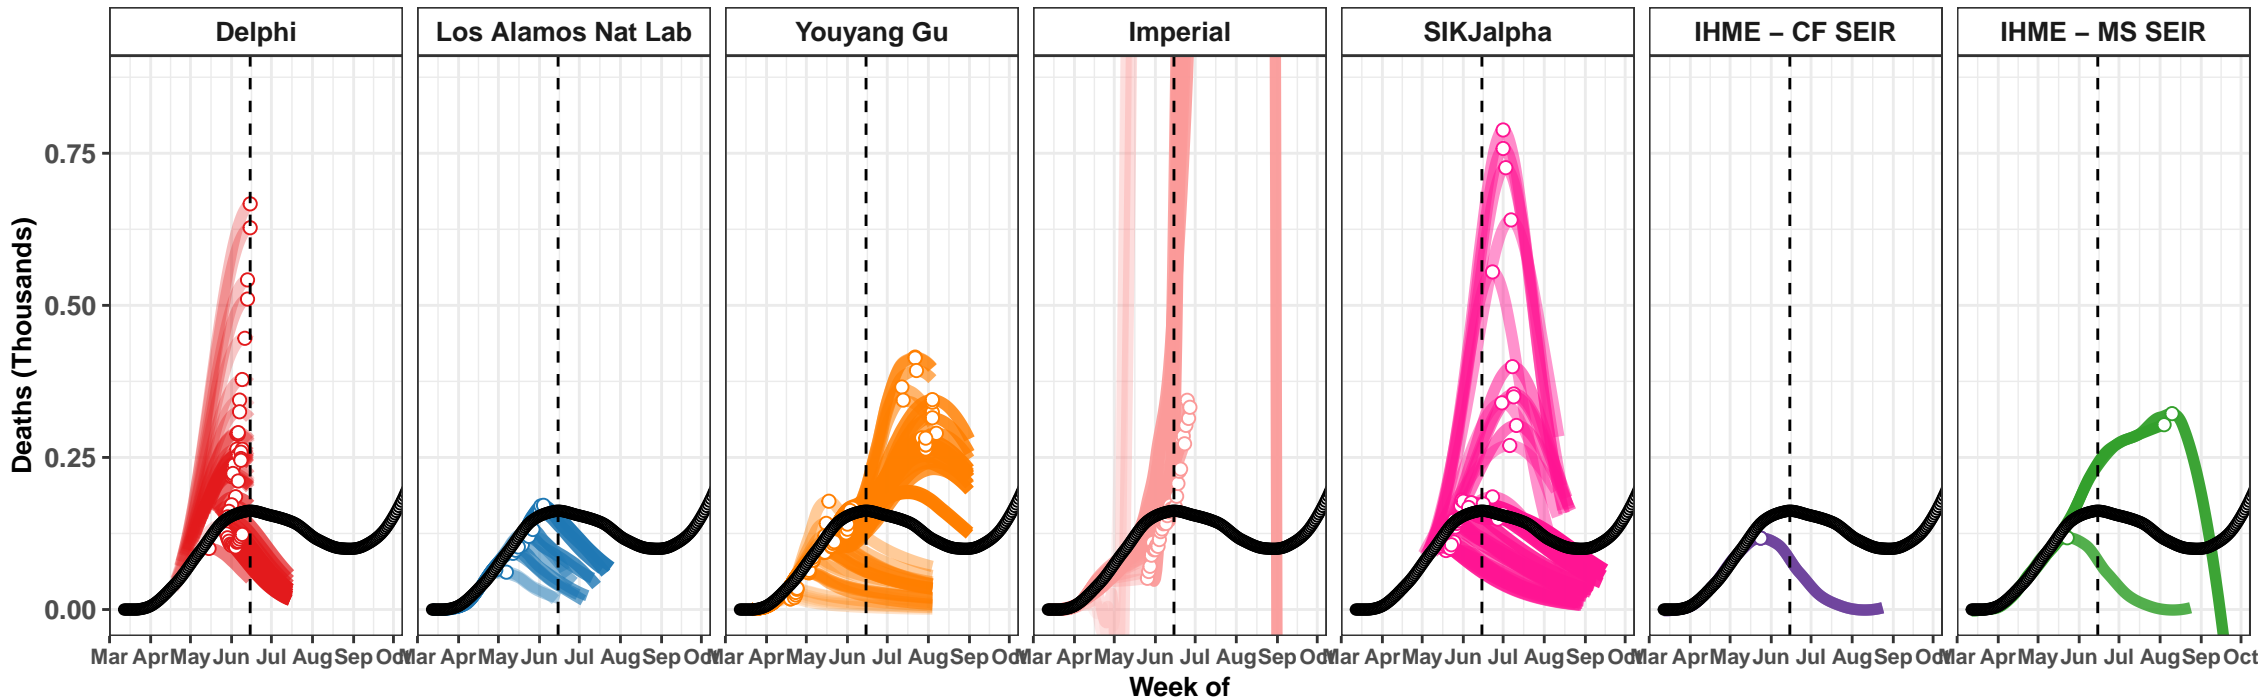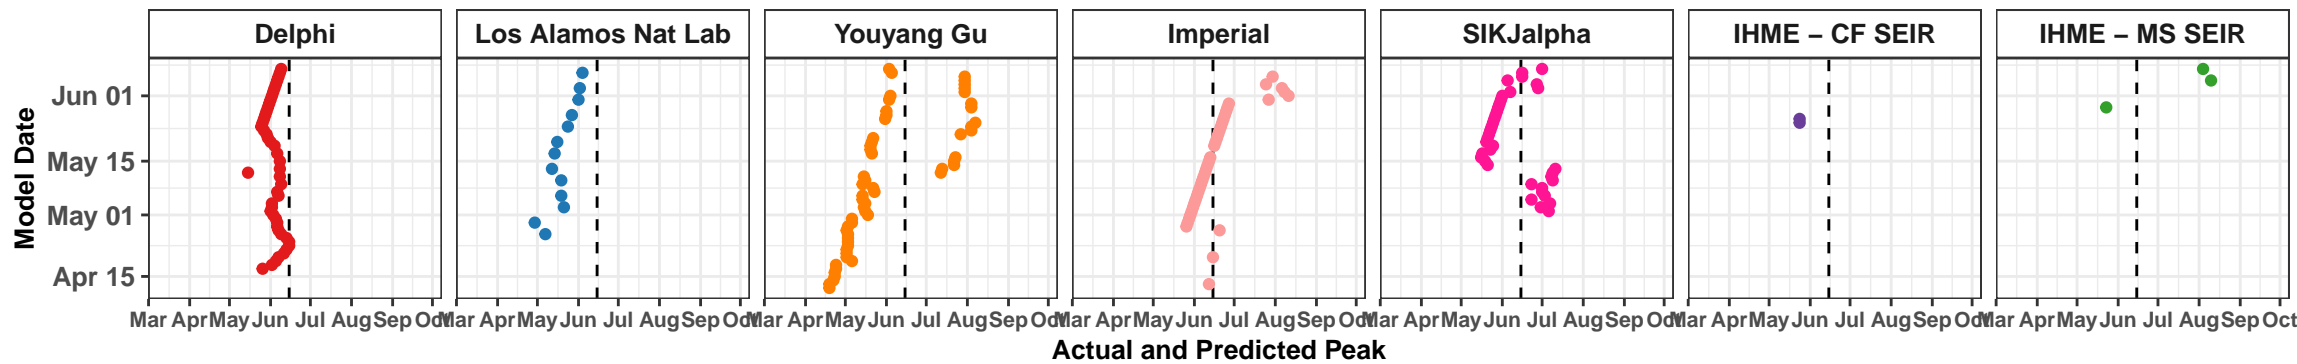

# South Africa – Smoothed Daily Deaths

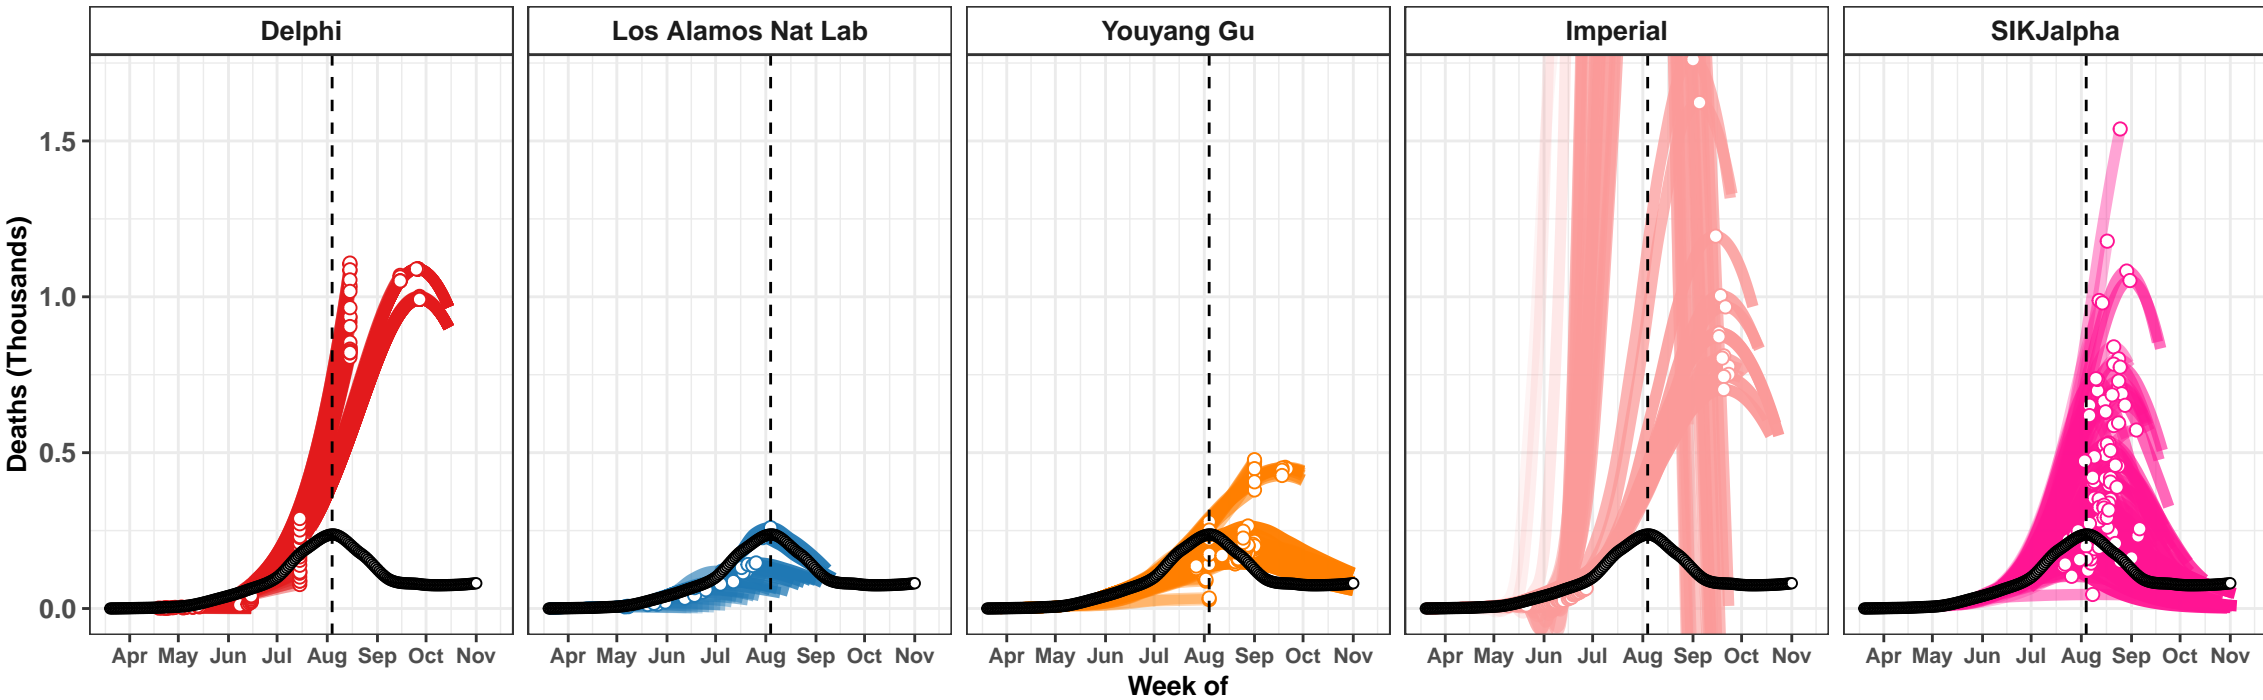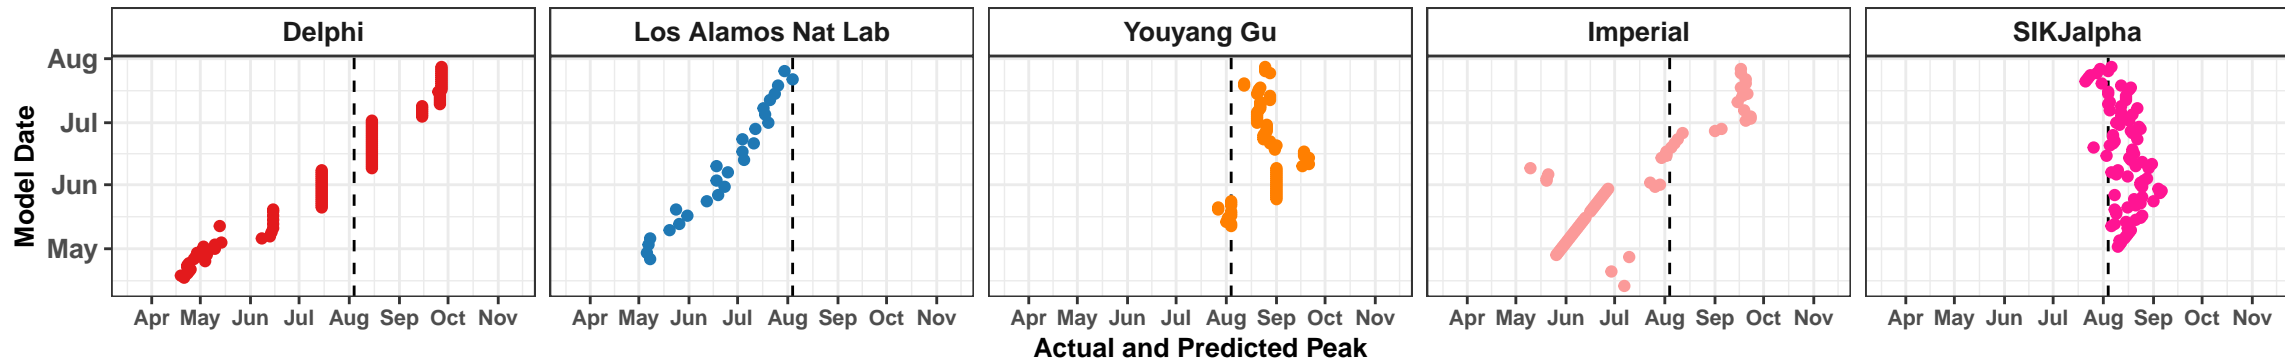

# Texas – Smoothed Daily Deaths

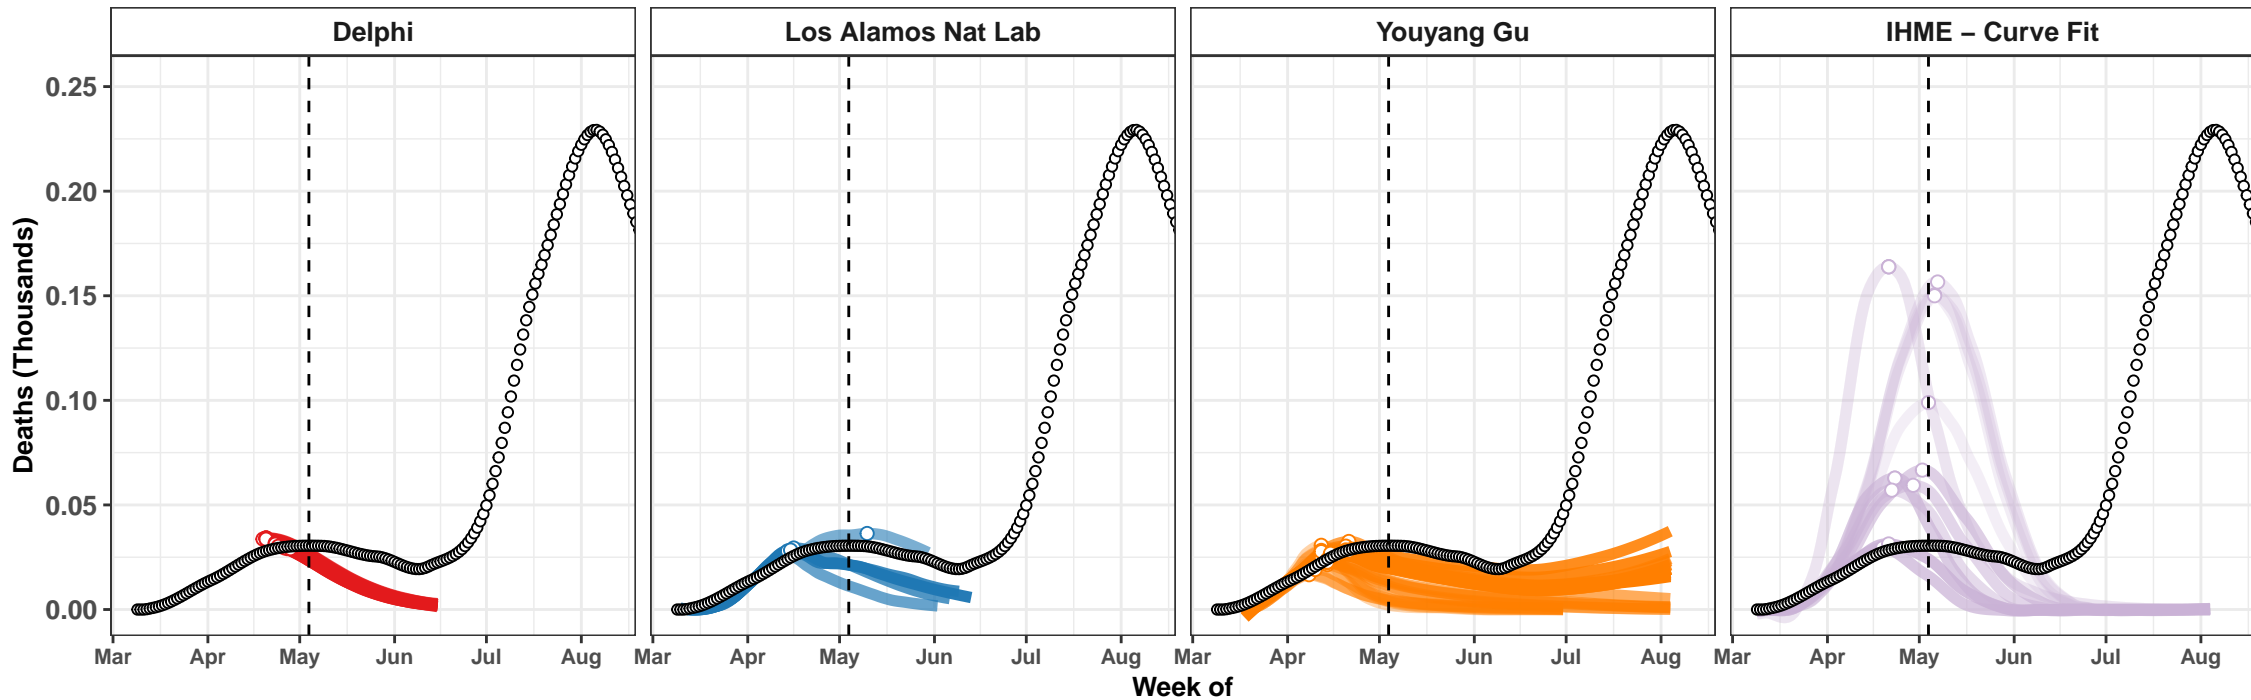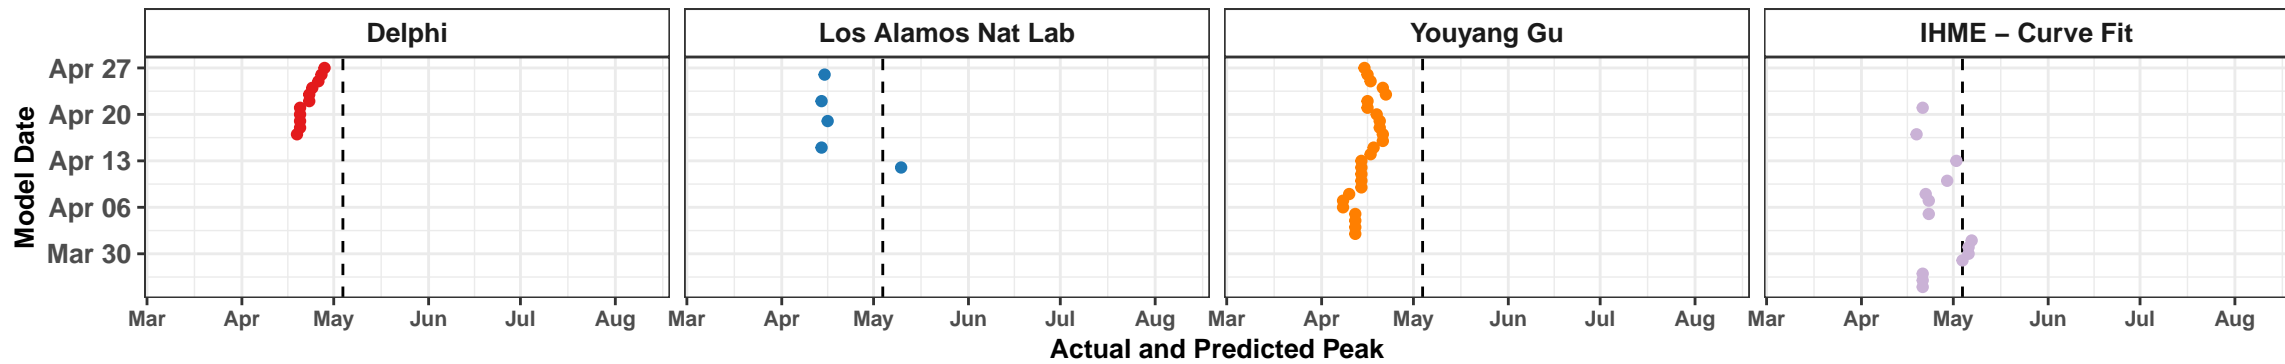

# California – Smoothed Daily Deaths

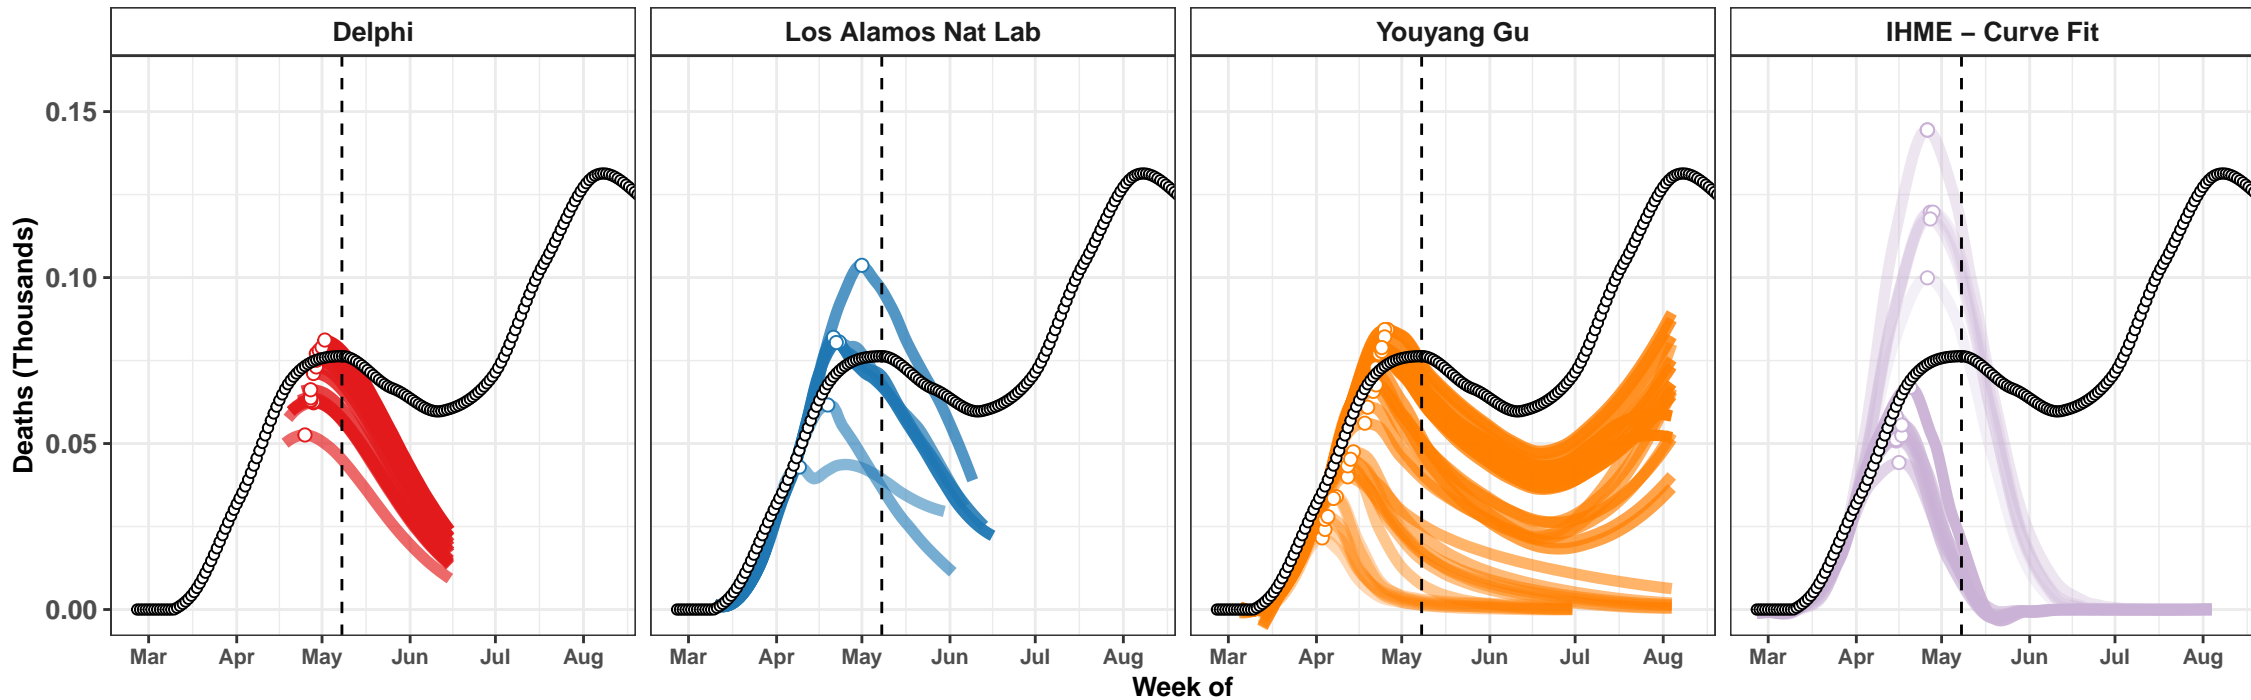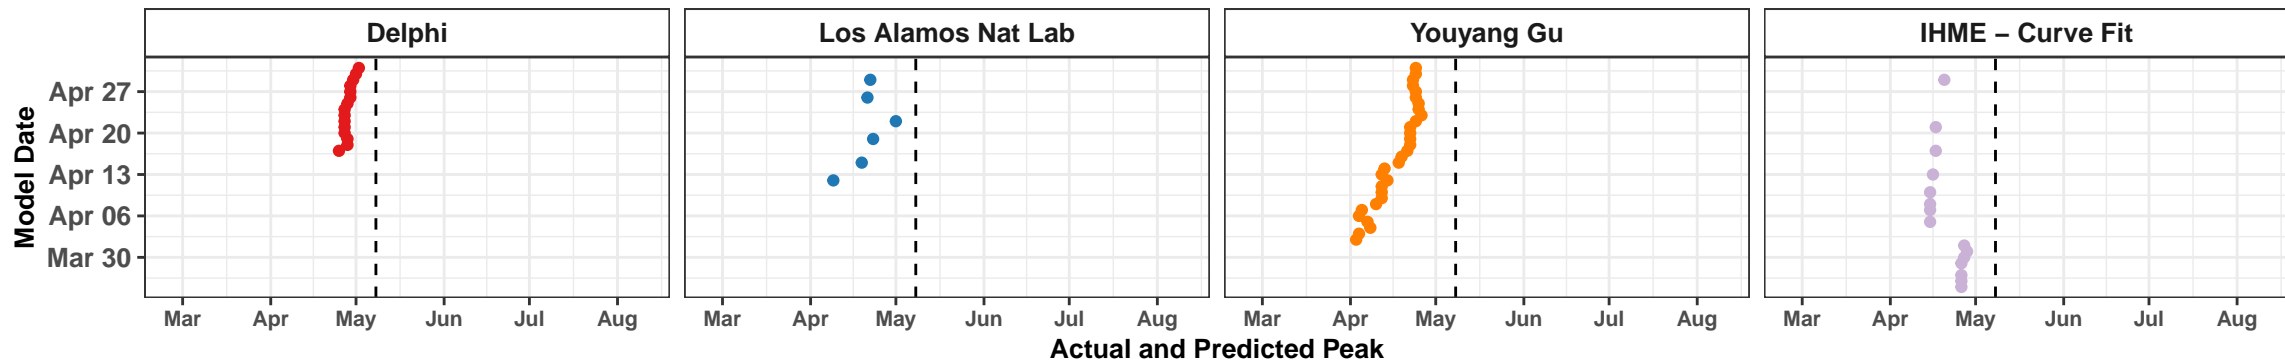

# Florida – Smoothed Daily Deaths

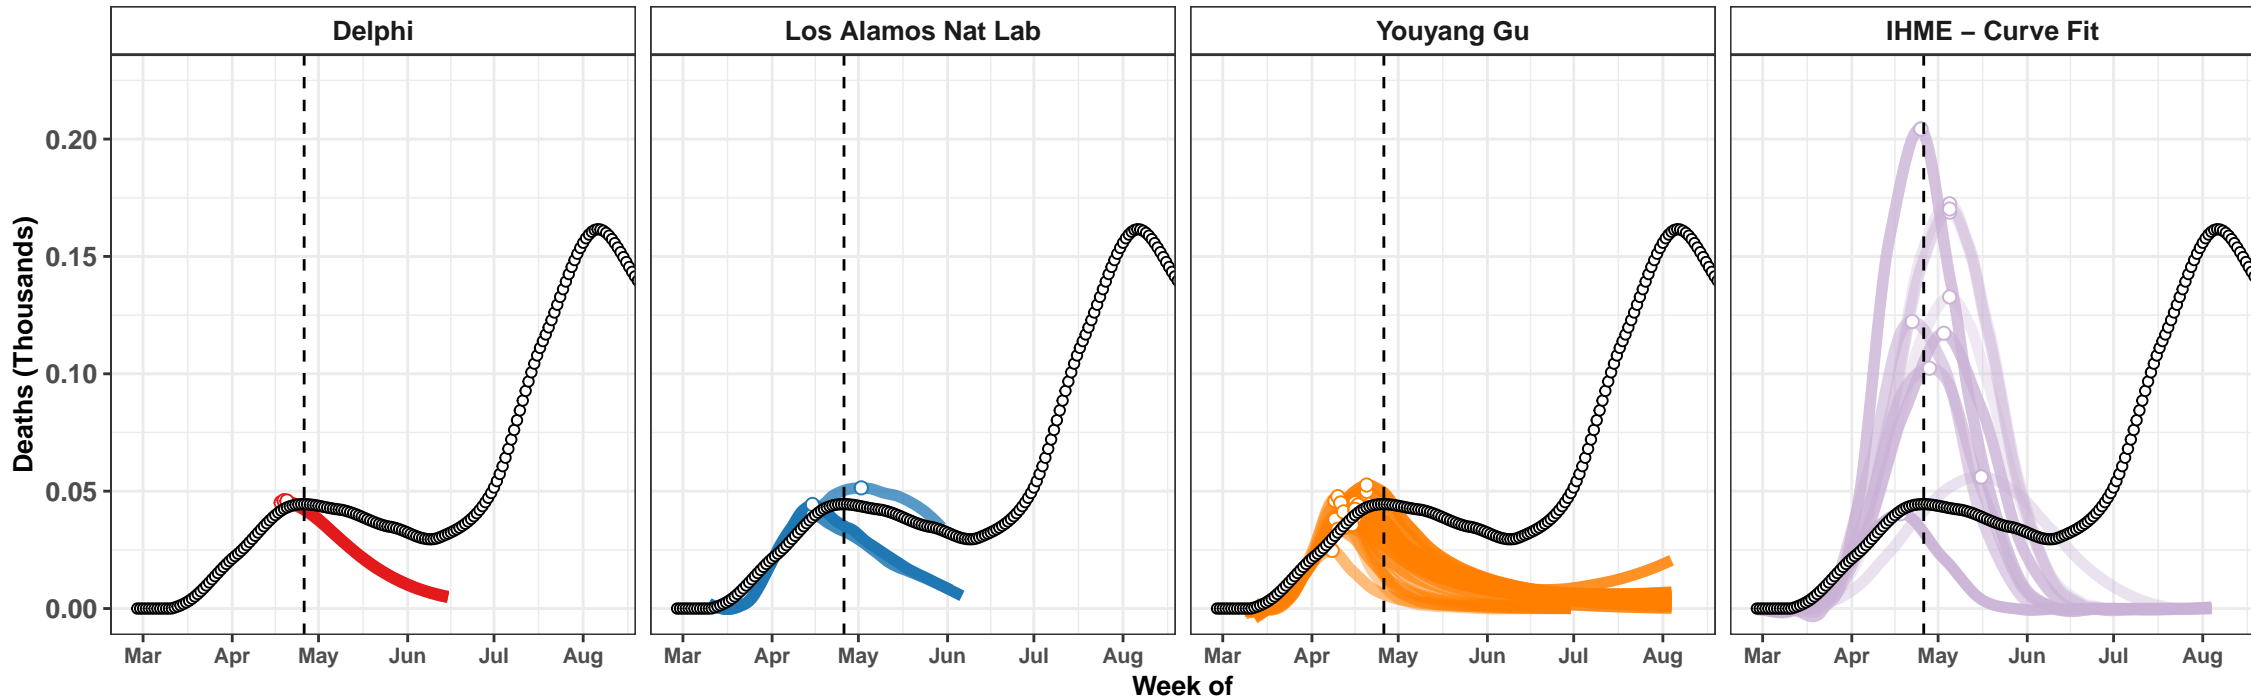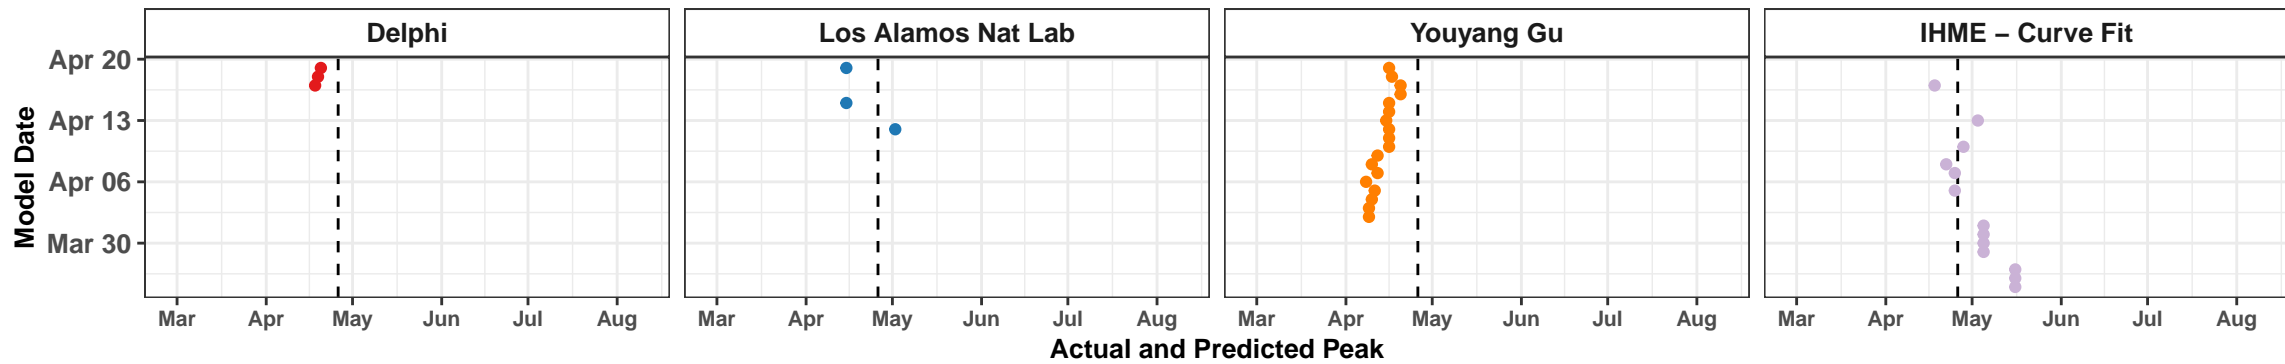

# New Jersey – Smoothed Daily Deaths

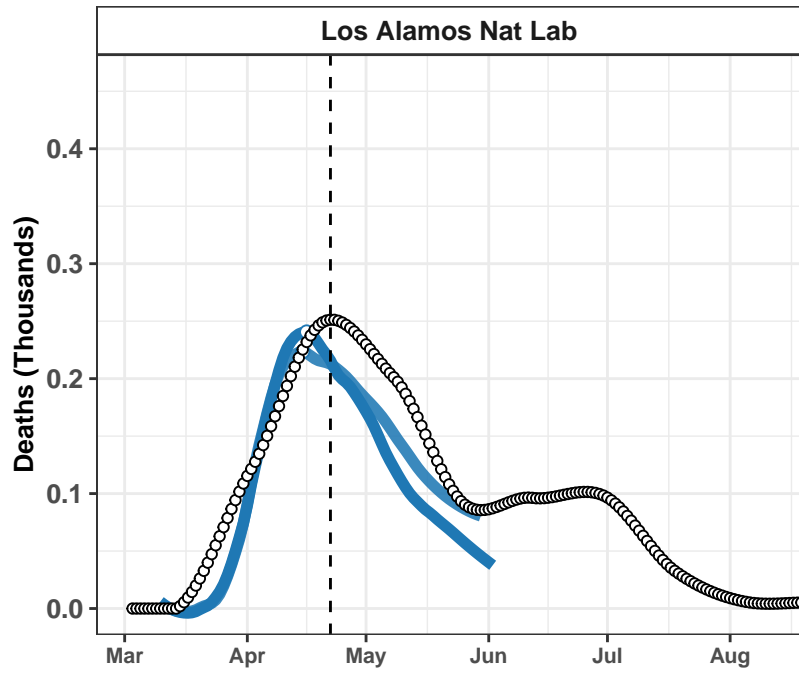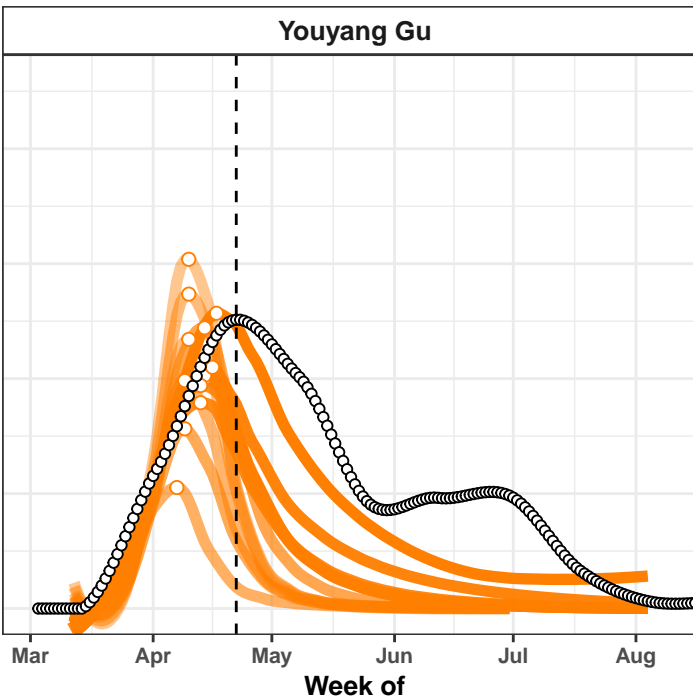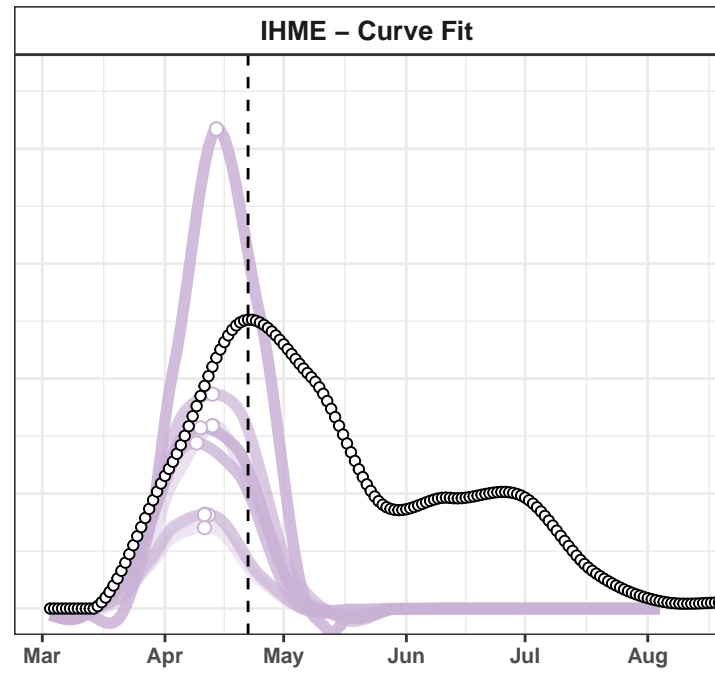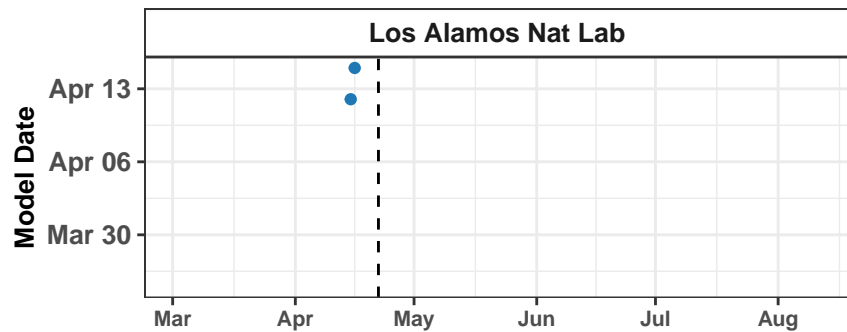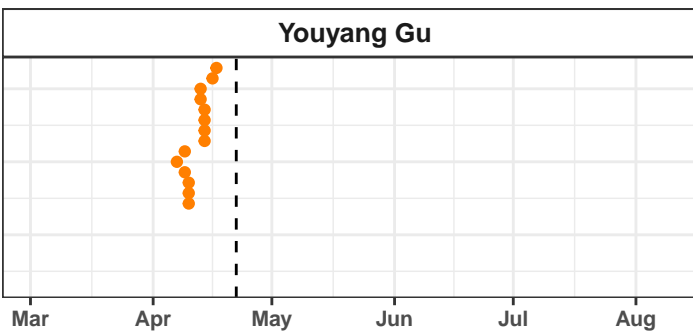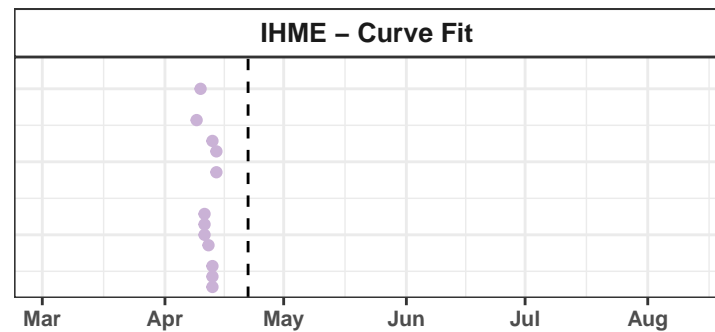

Actual and Predicted Peak



# Chile – Smoothed Daily Deaths

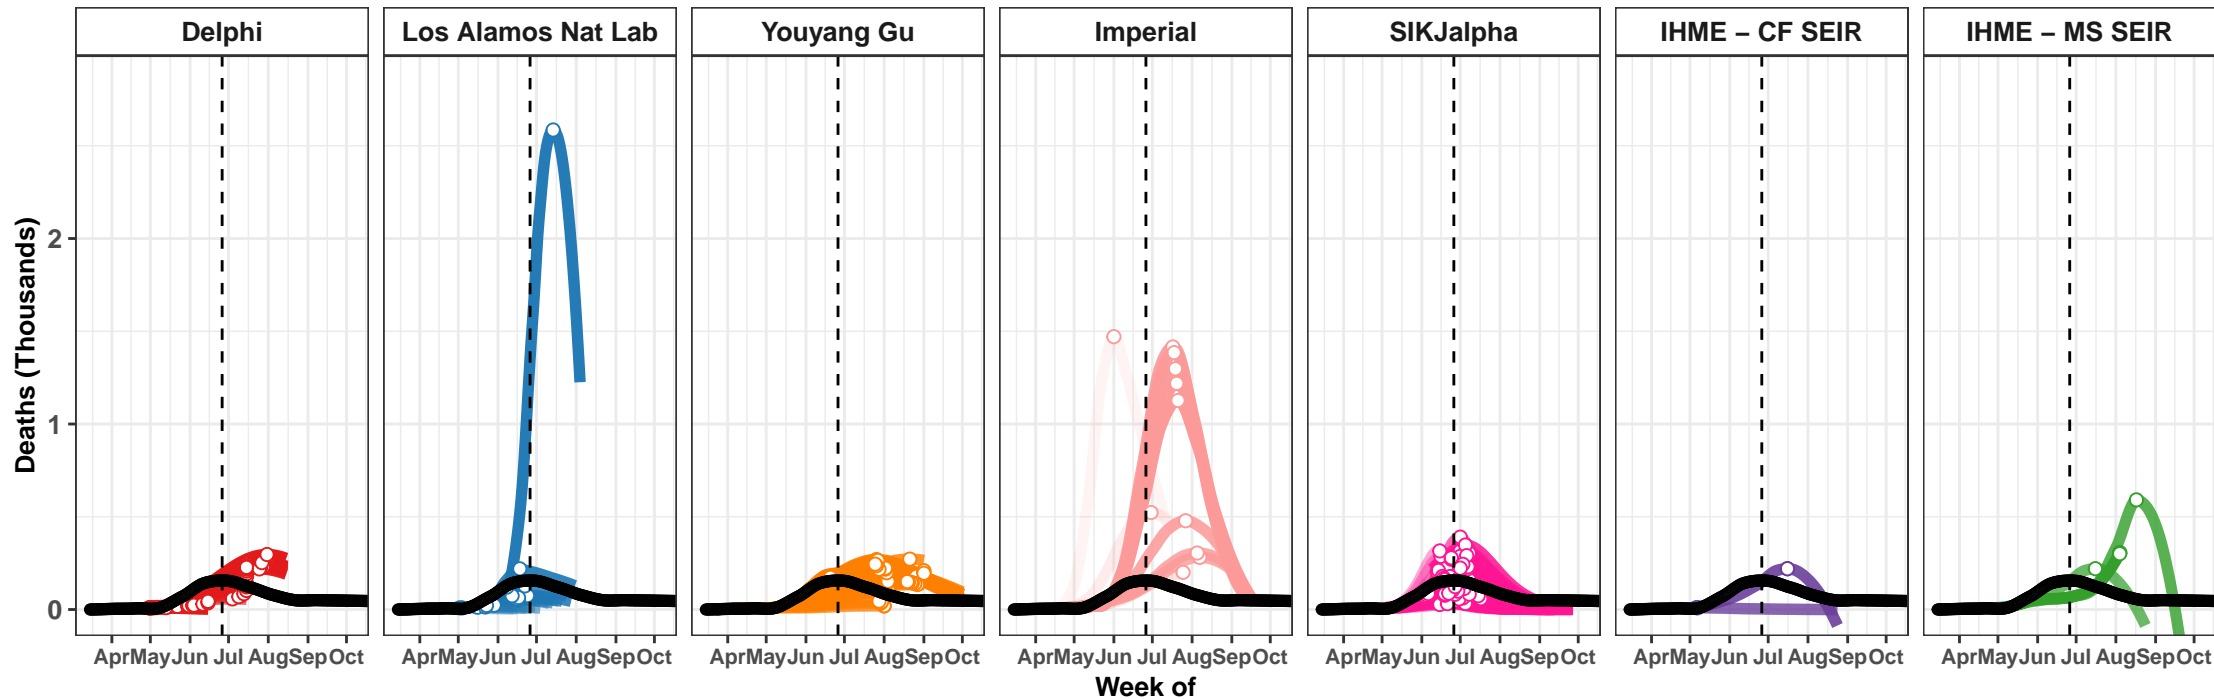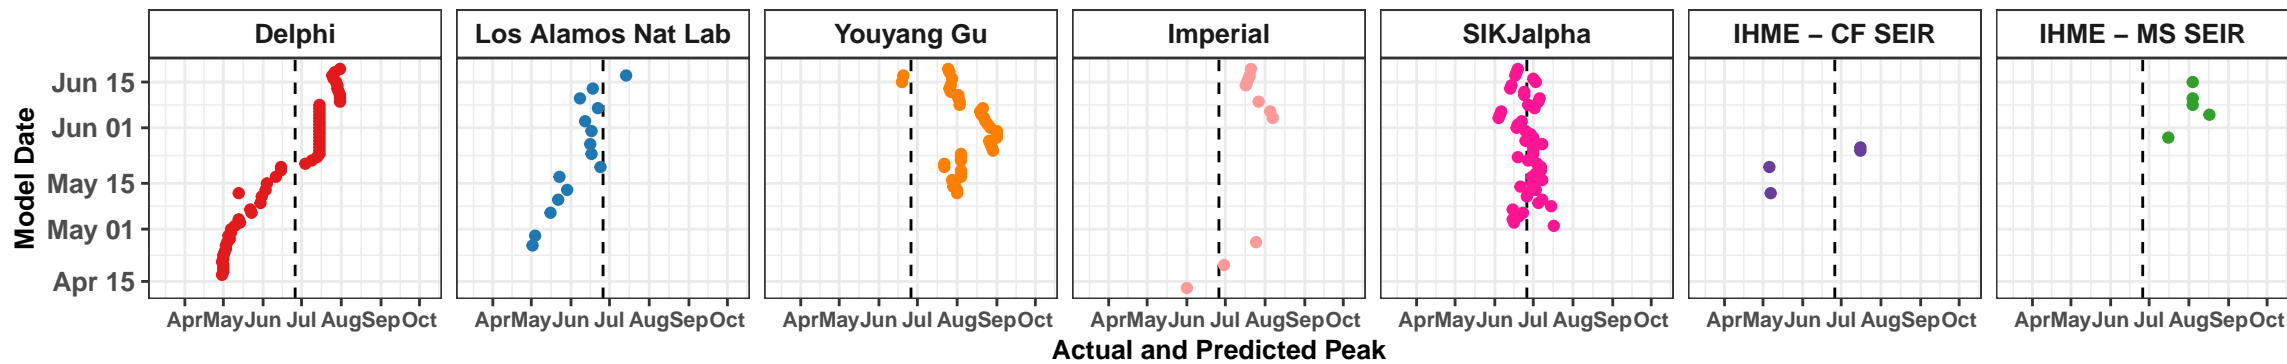

# Indonesia – Smoothed Daily Deaths

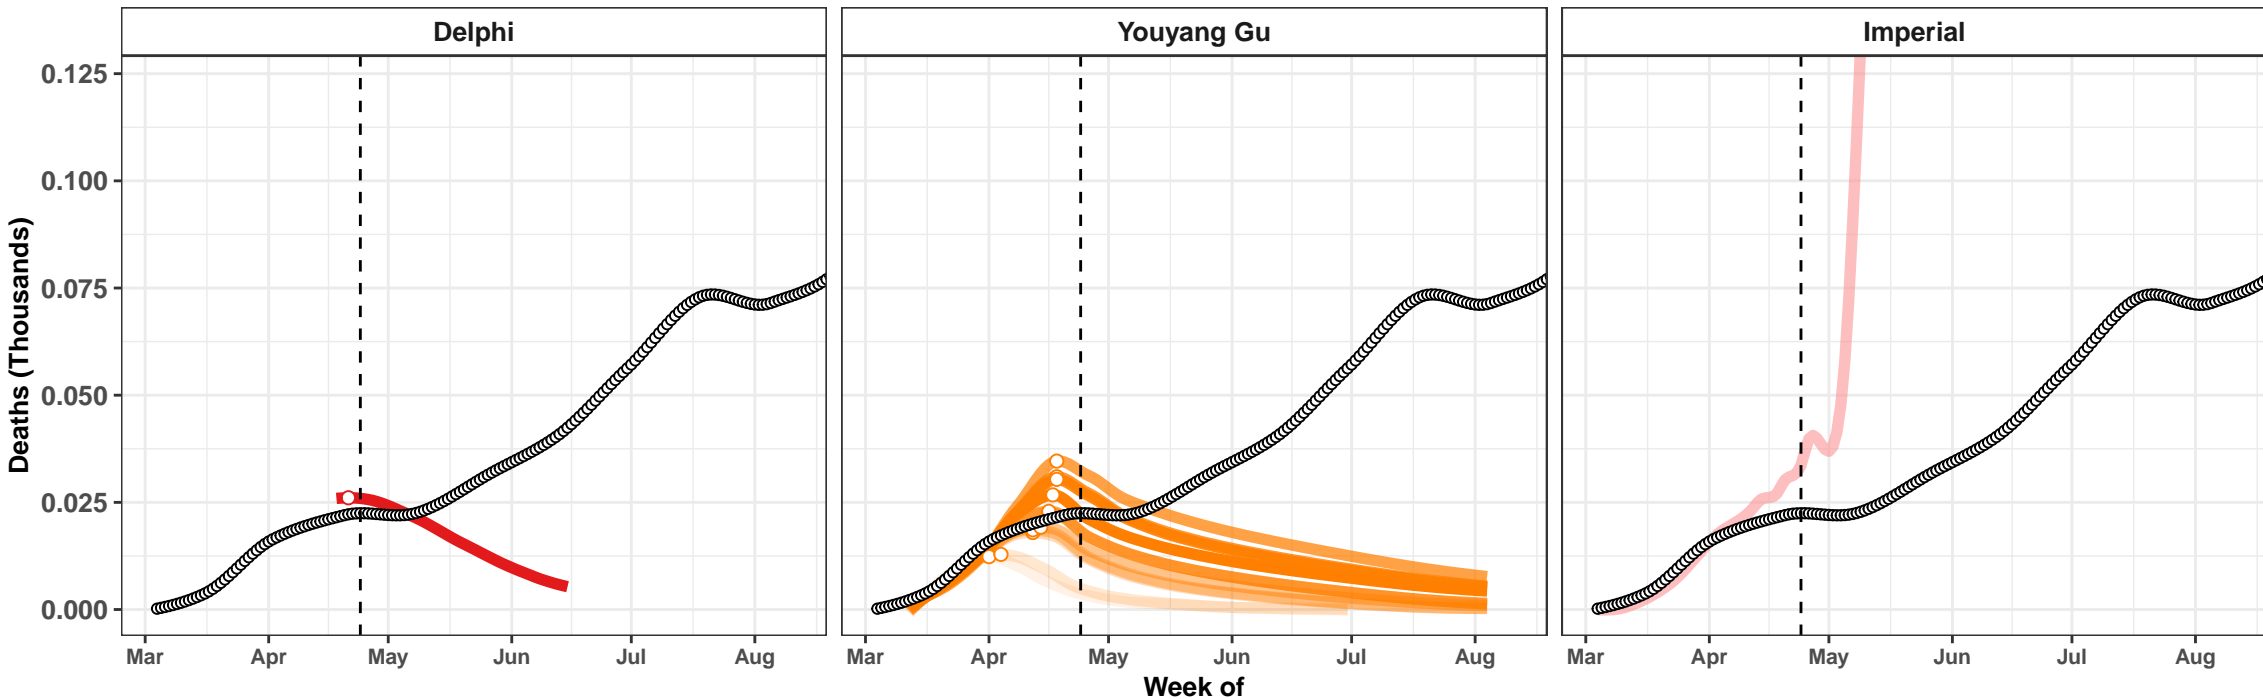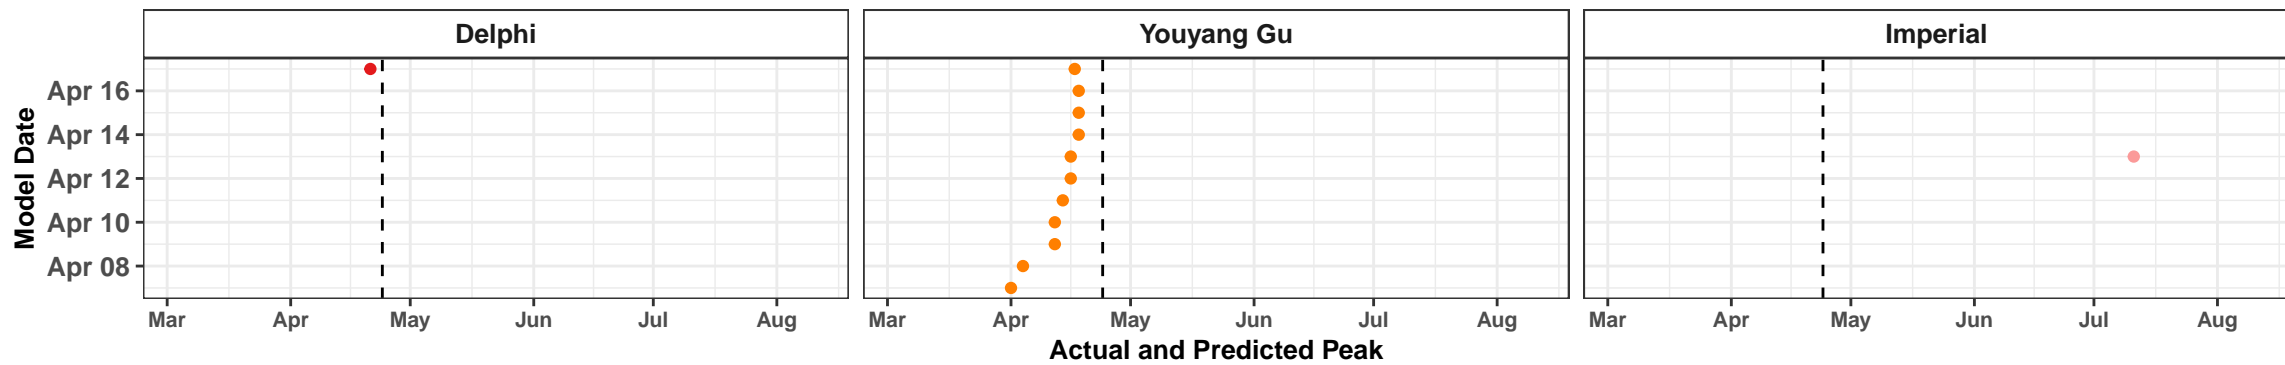

# Ecuador – Smoothed Daily Deaths

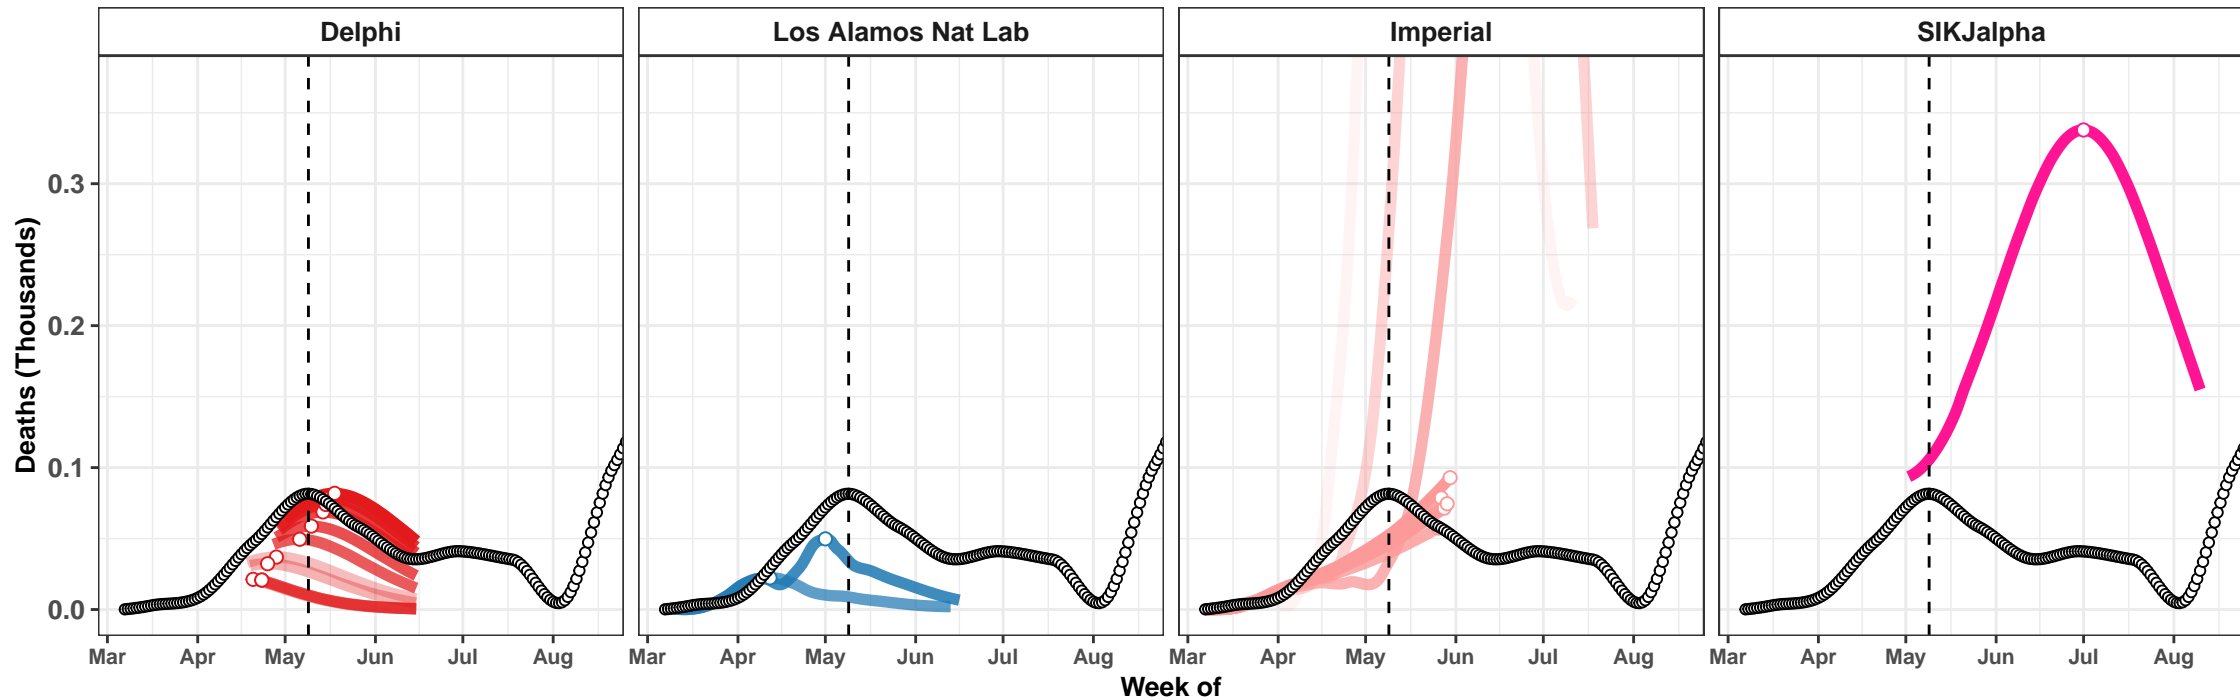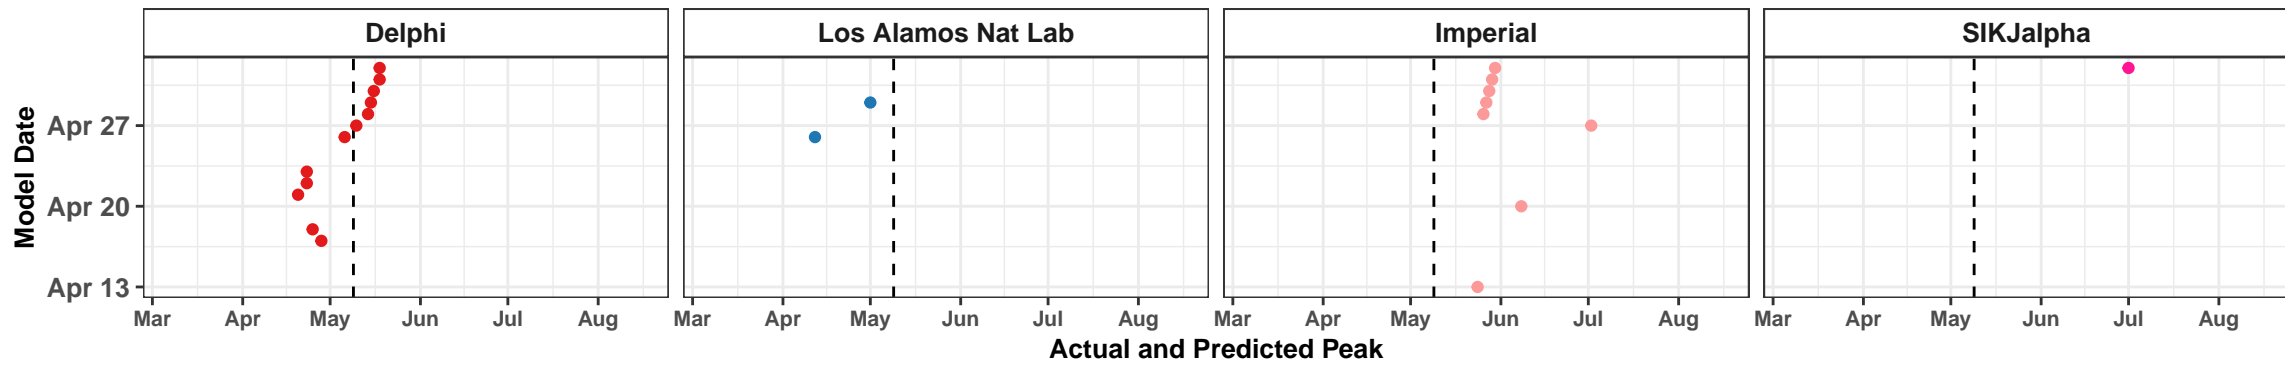

# Belgium – Smoothed Daily Deaths

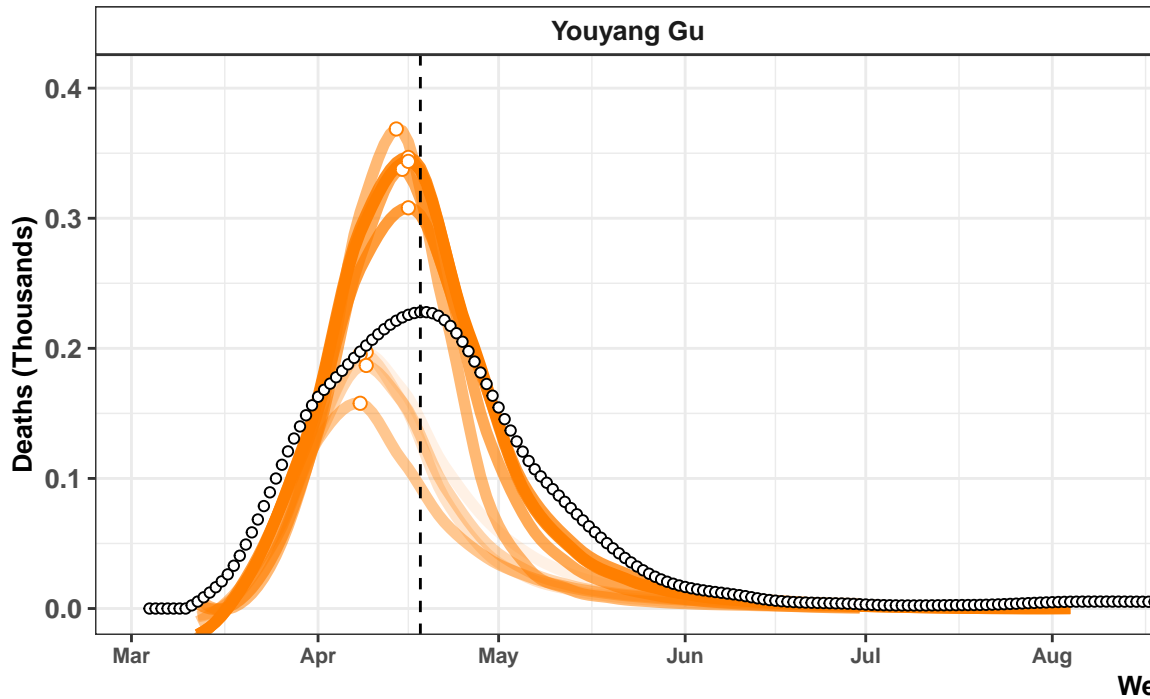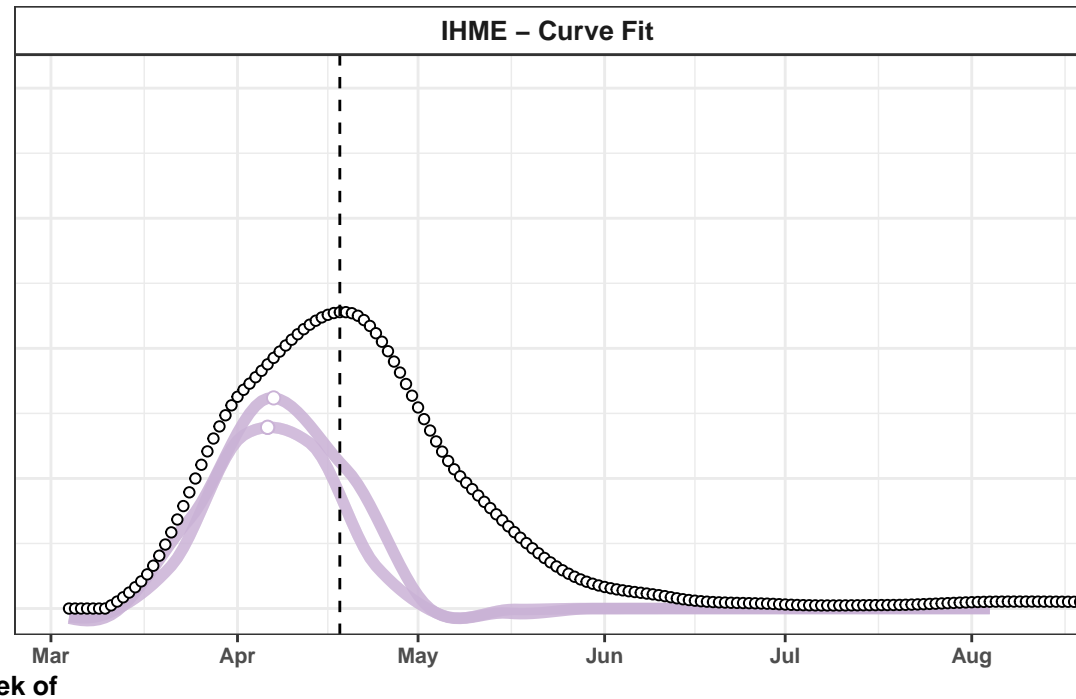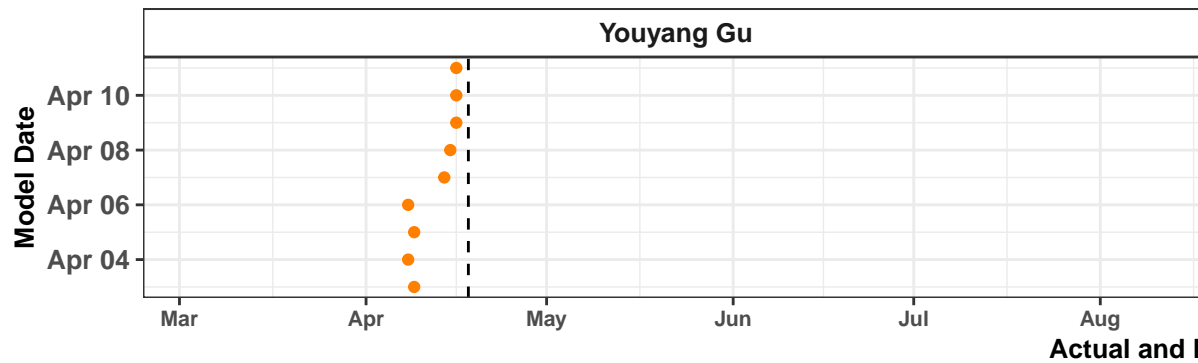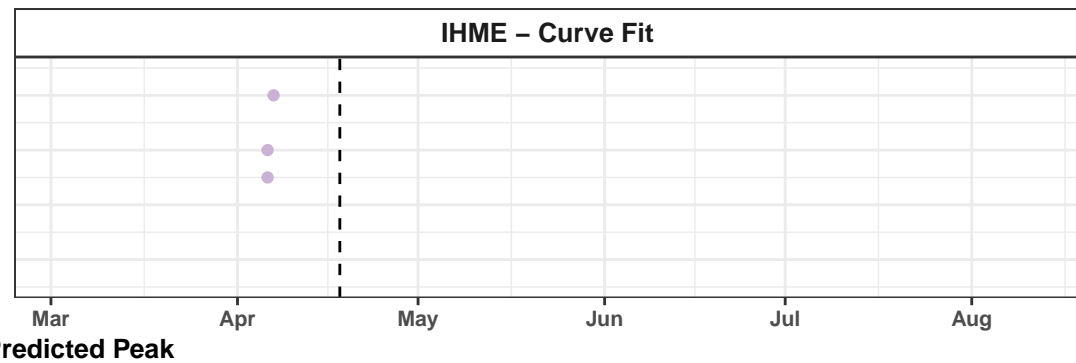

# Iraq – Smoothed Daily Deaths

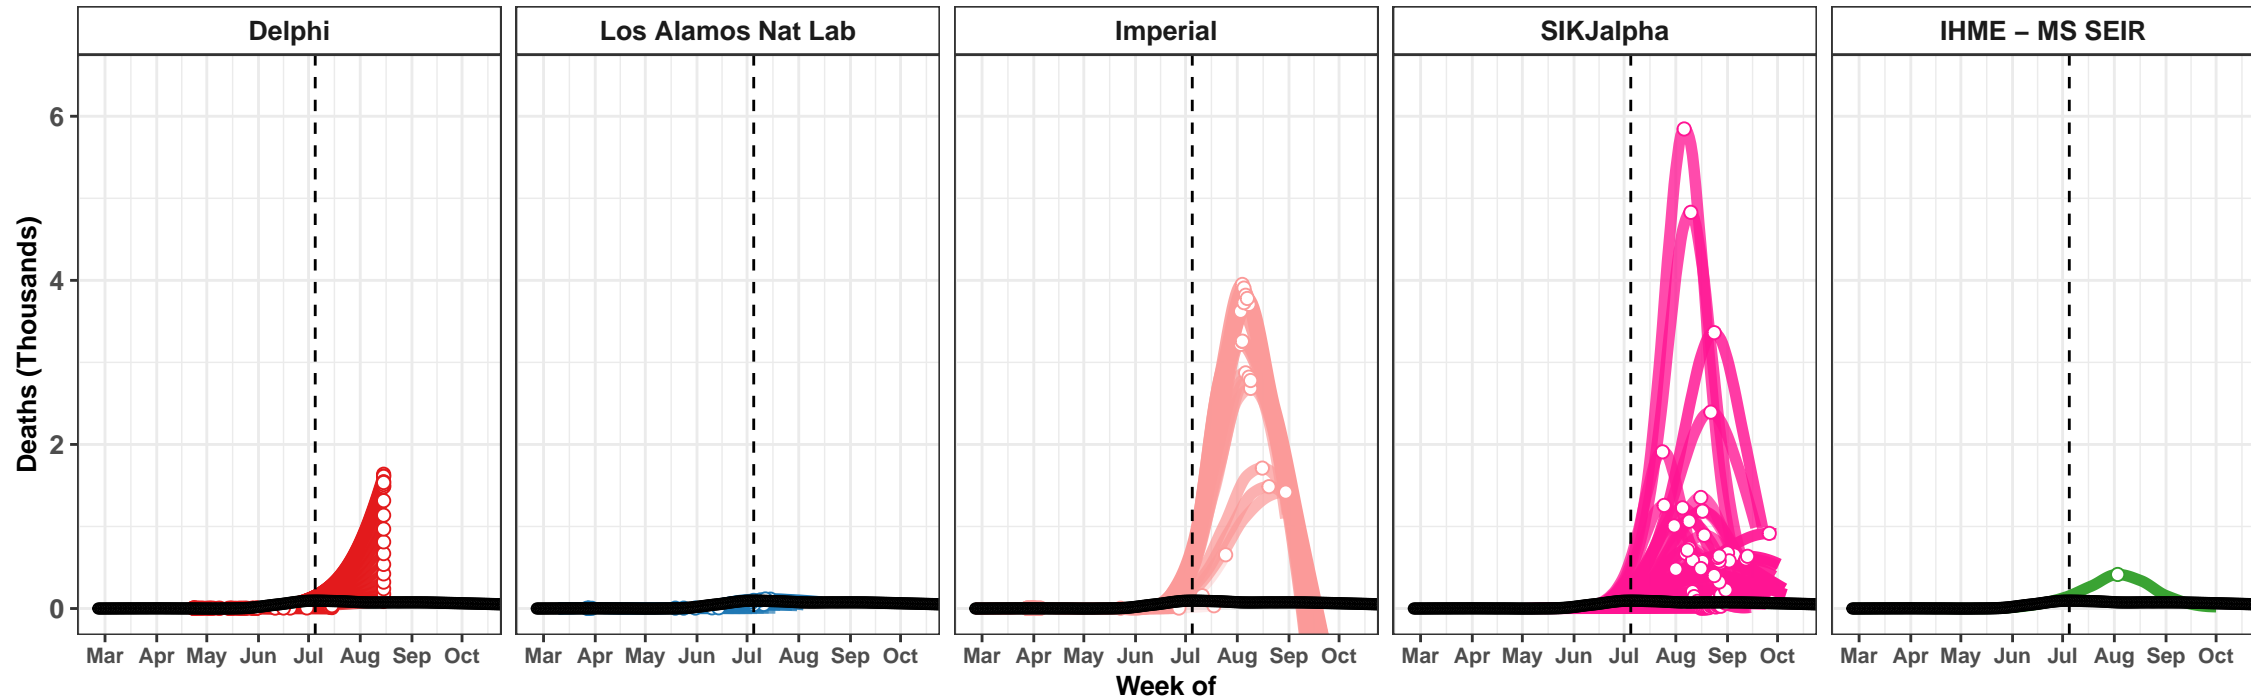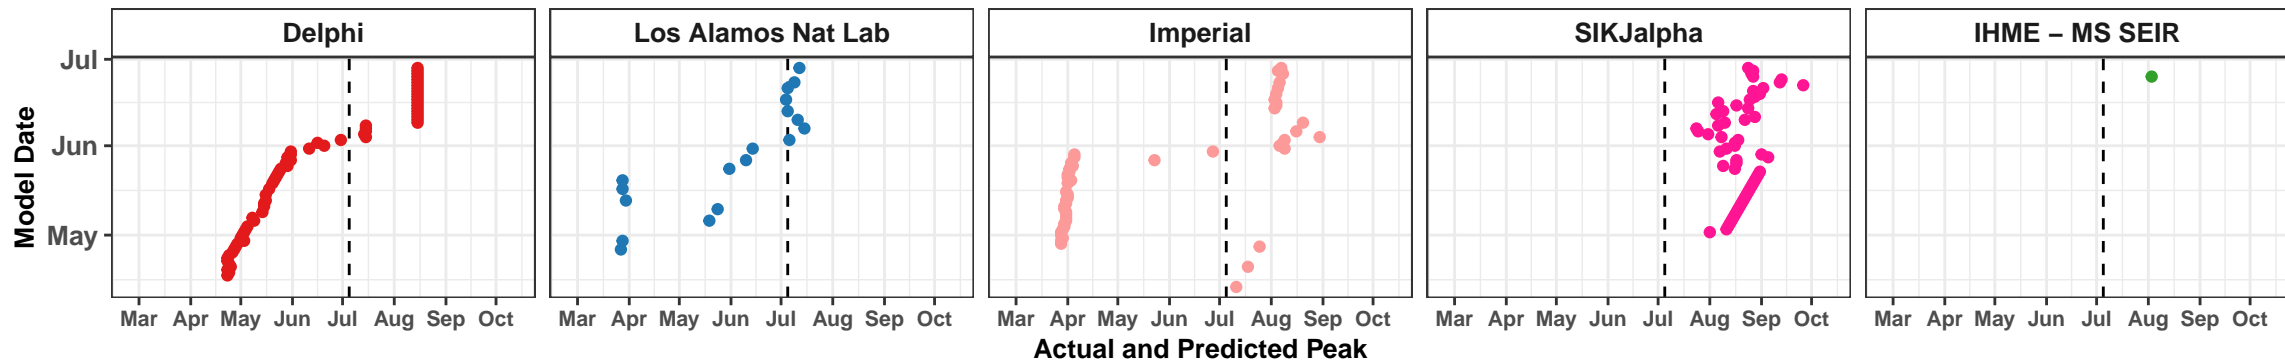

# Germany – Smoothed Daily Deaths

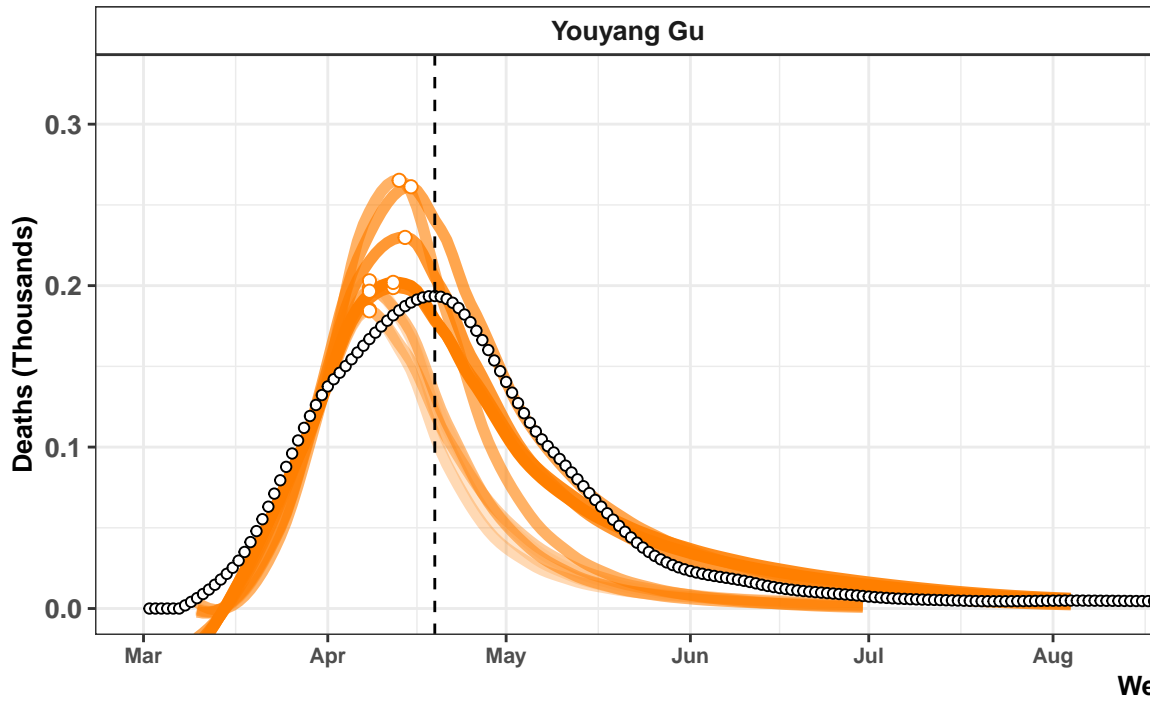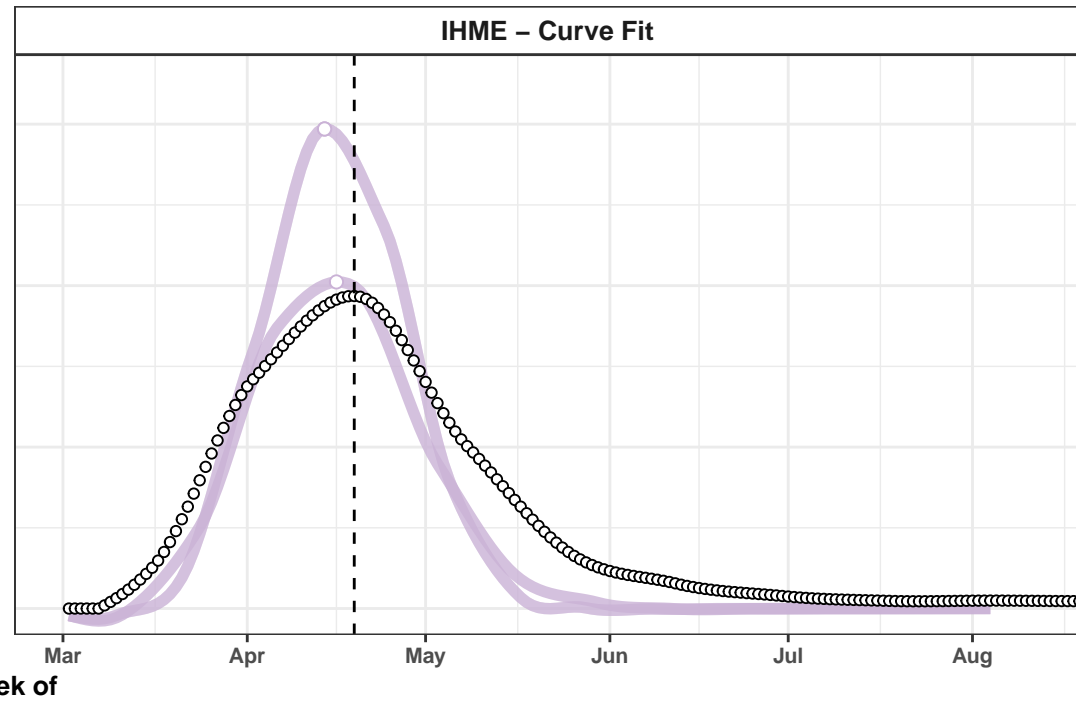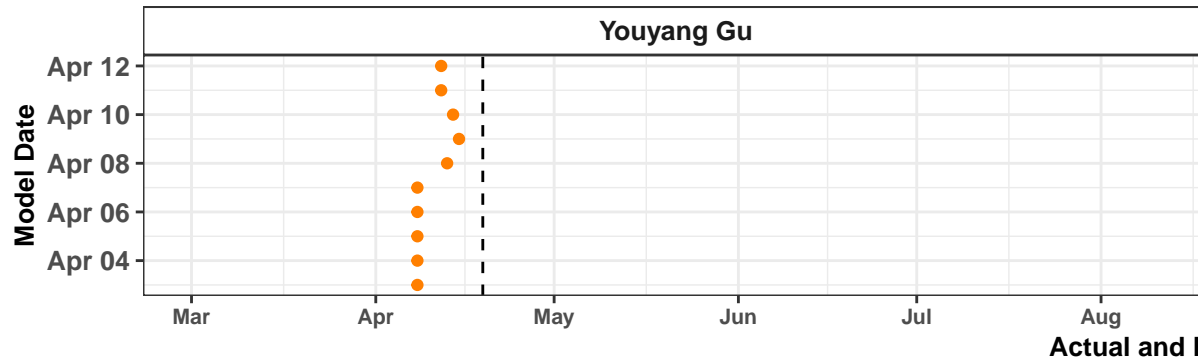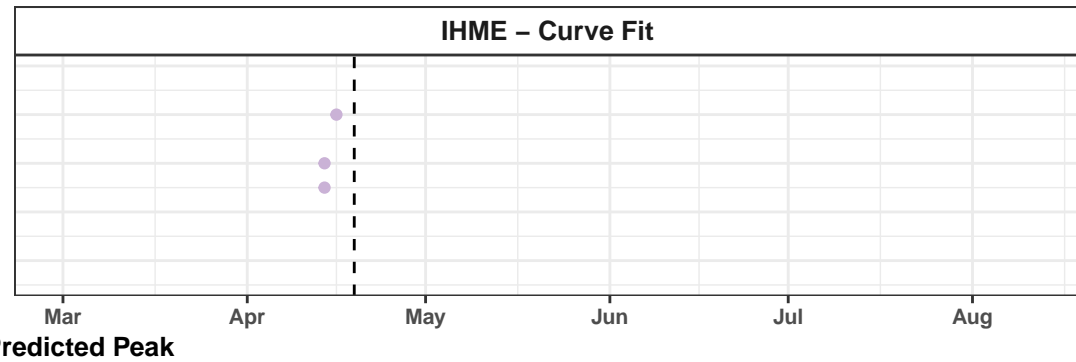

# Turkey – Smoothed Daily Deaths

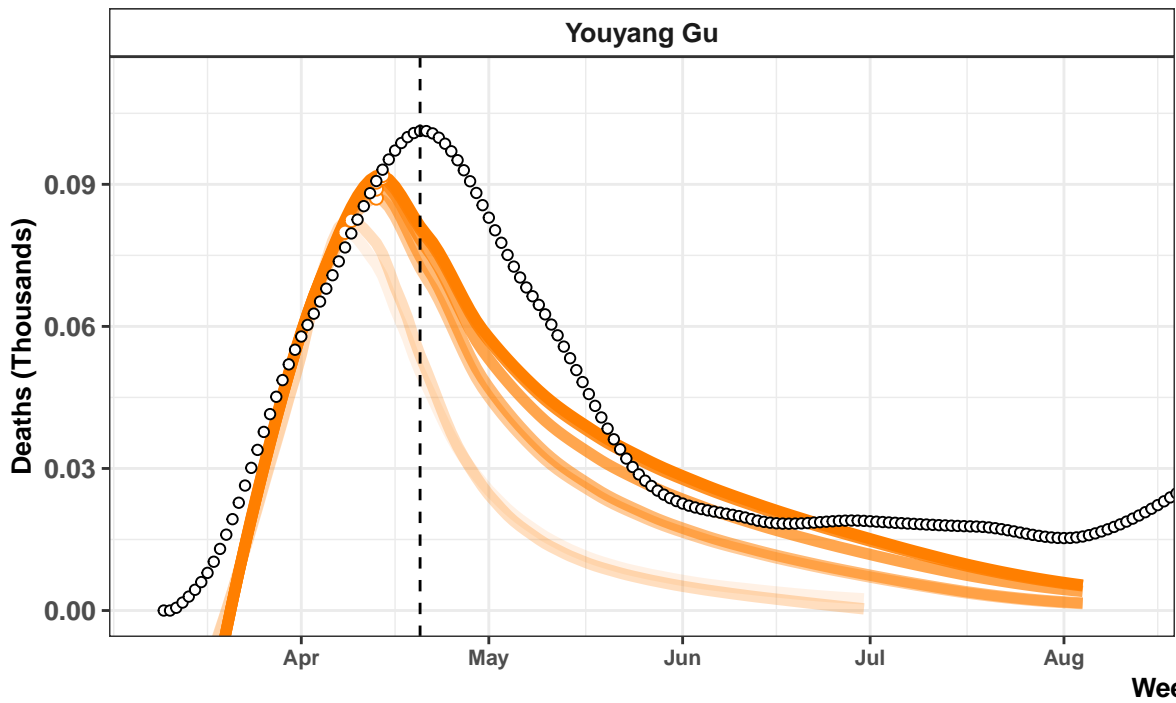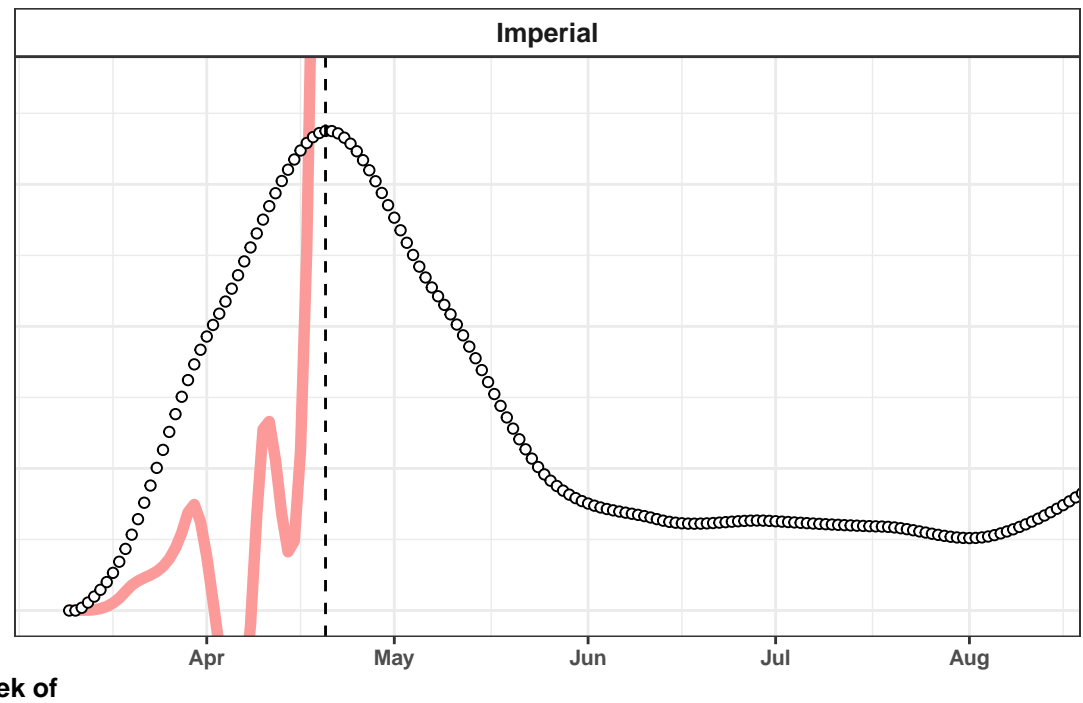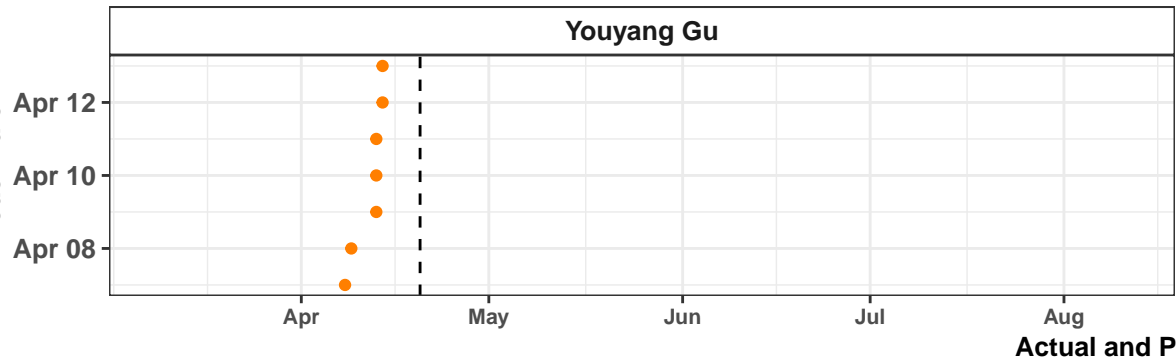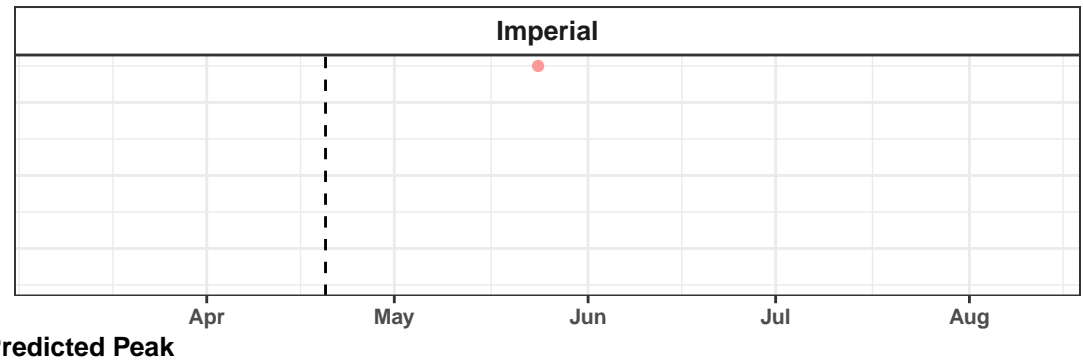

# Canada – Smoothed Daily Deaths

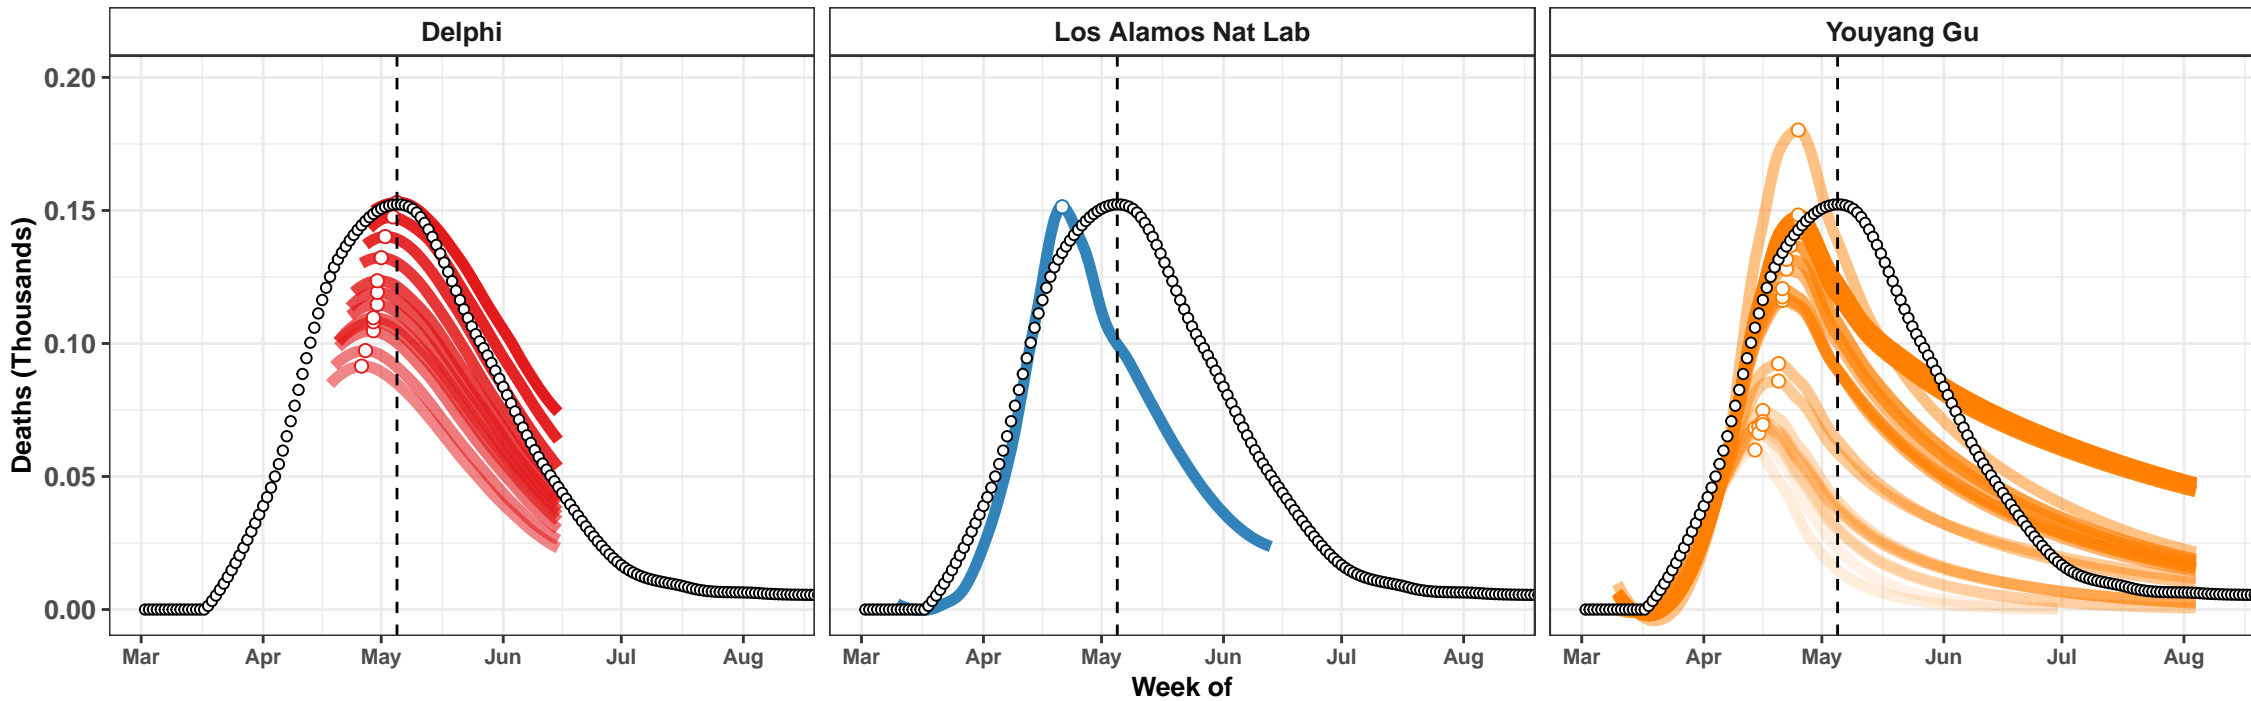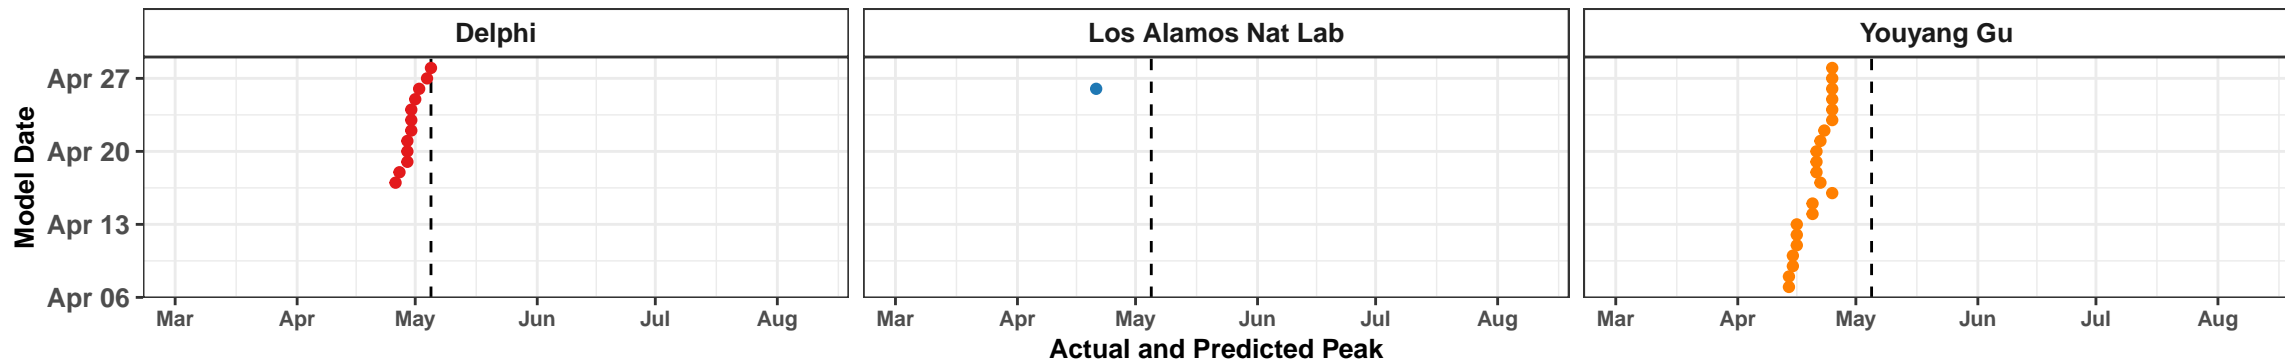



# Illinois – Smoothed Daily Deaths

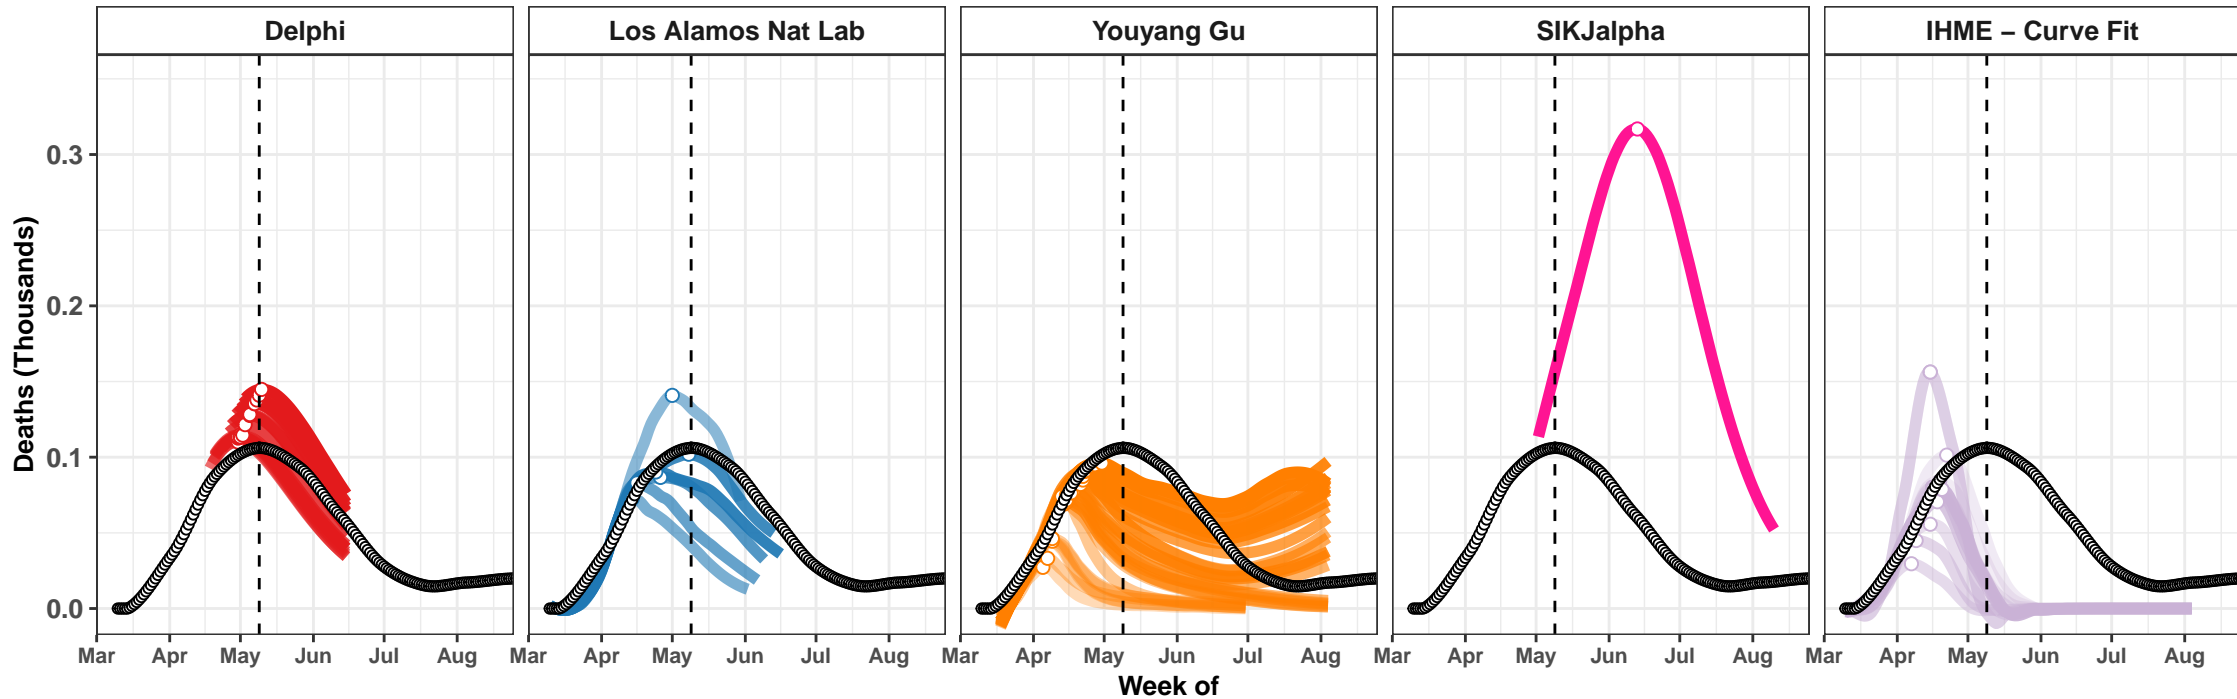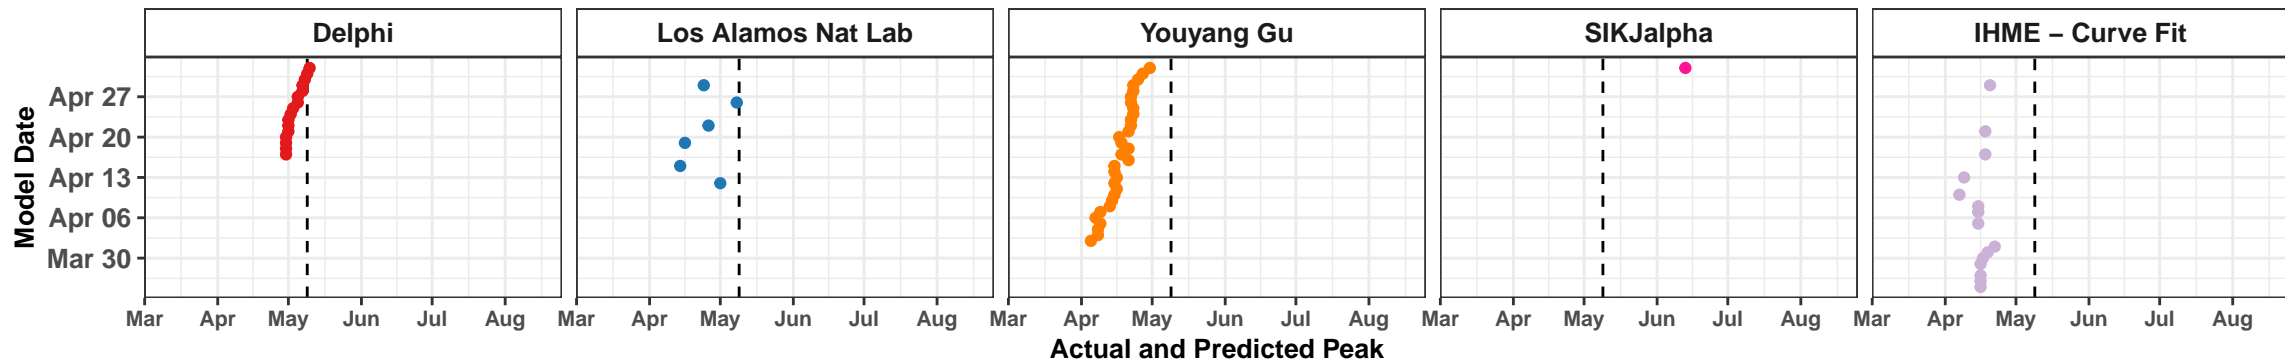

# Massachusetts – Smoothed Daily Deaths

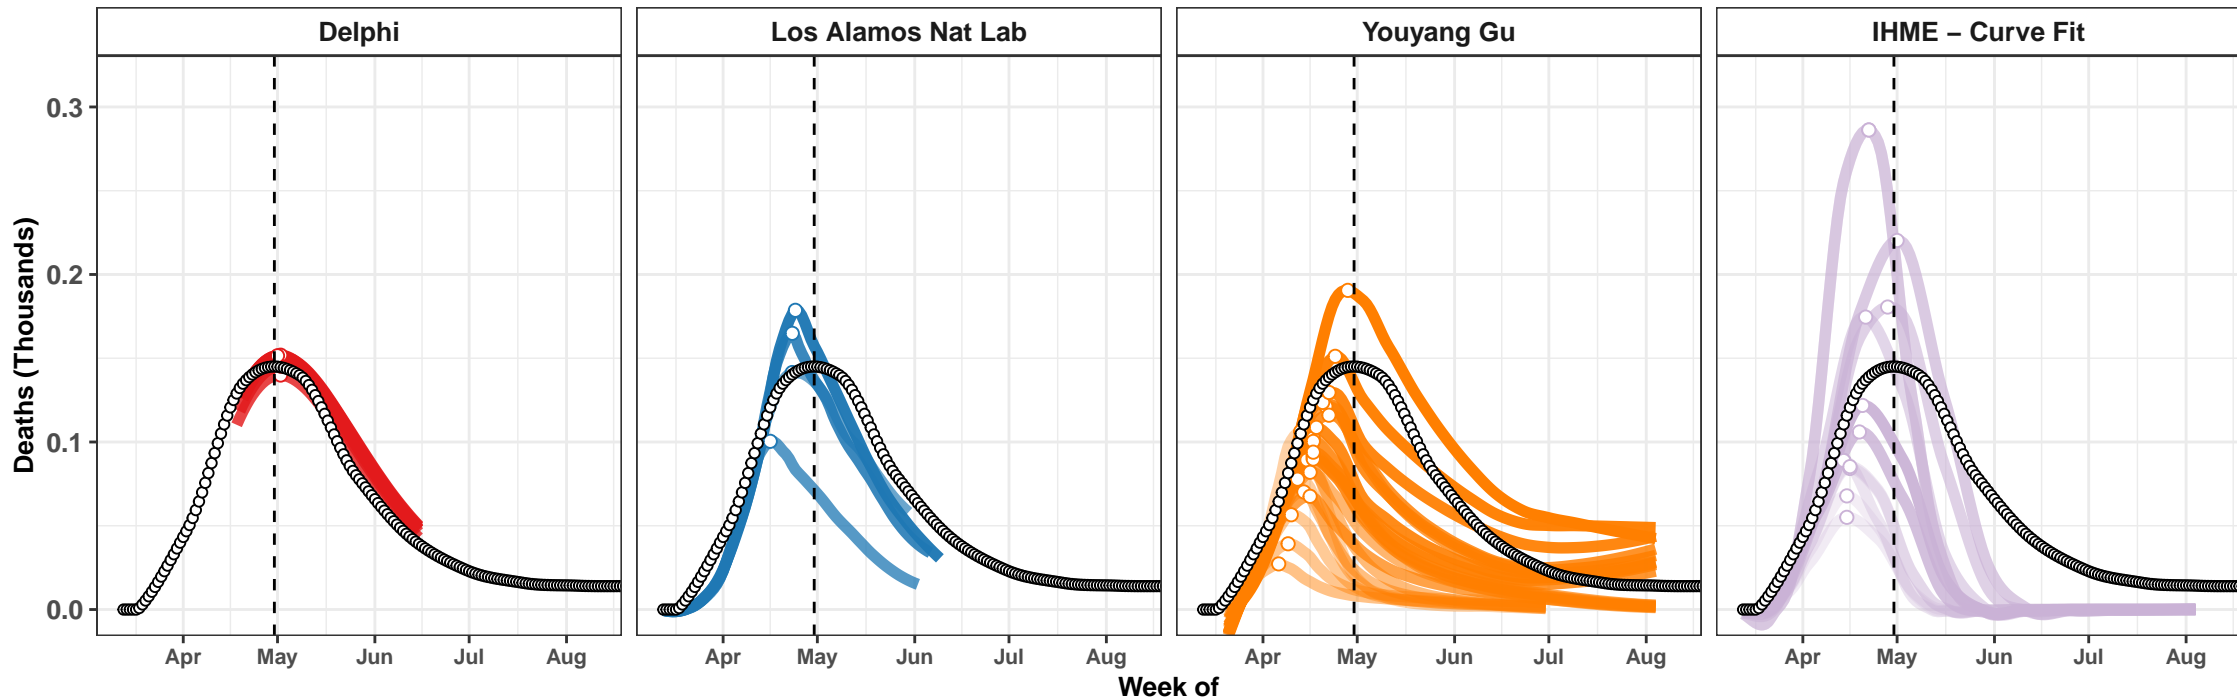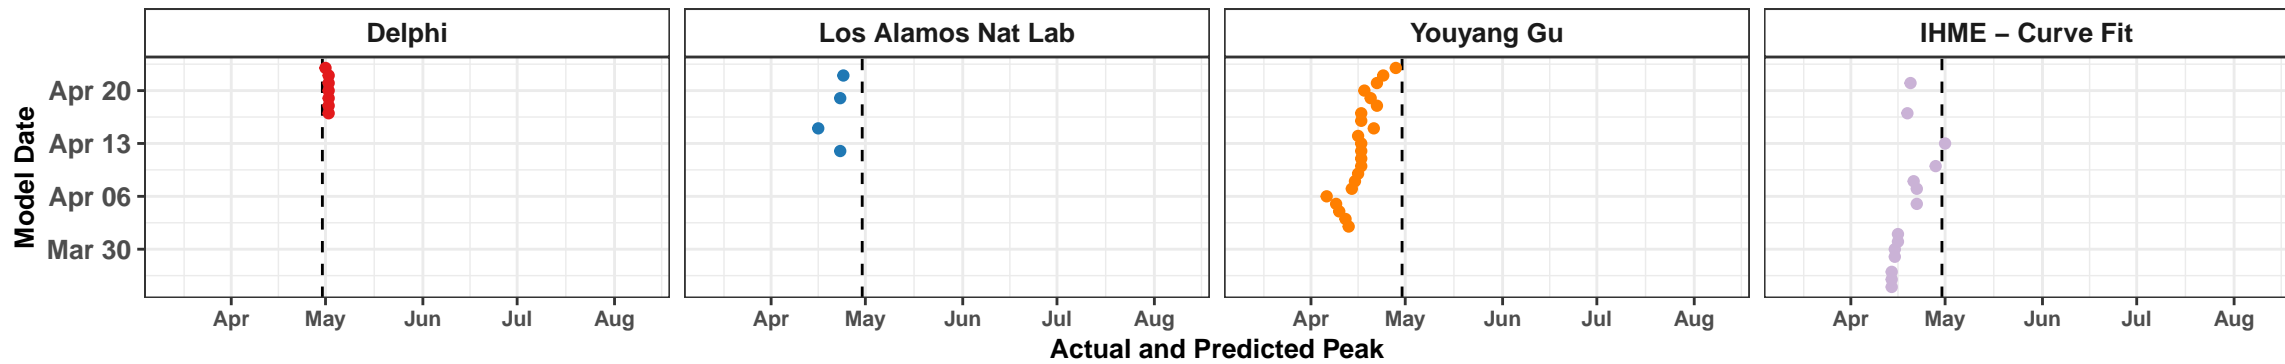

# Pennsylvania – Smoothed Daily Deaths

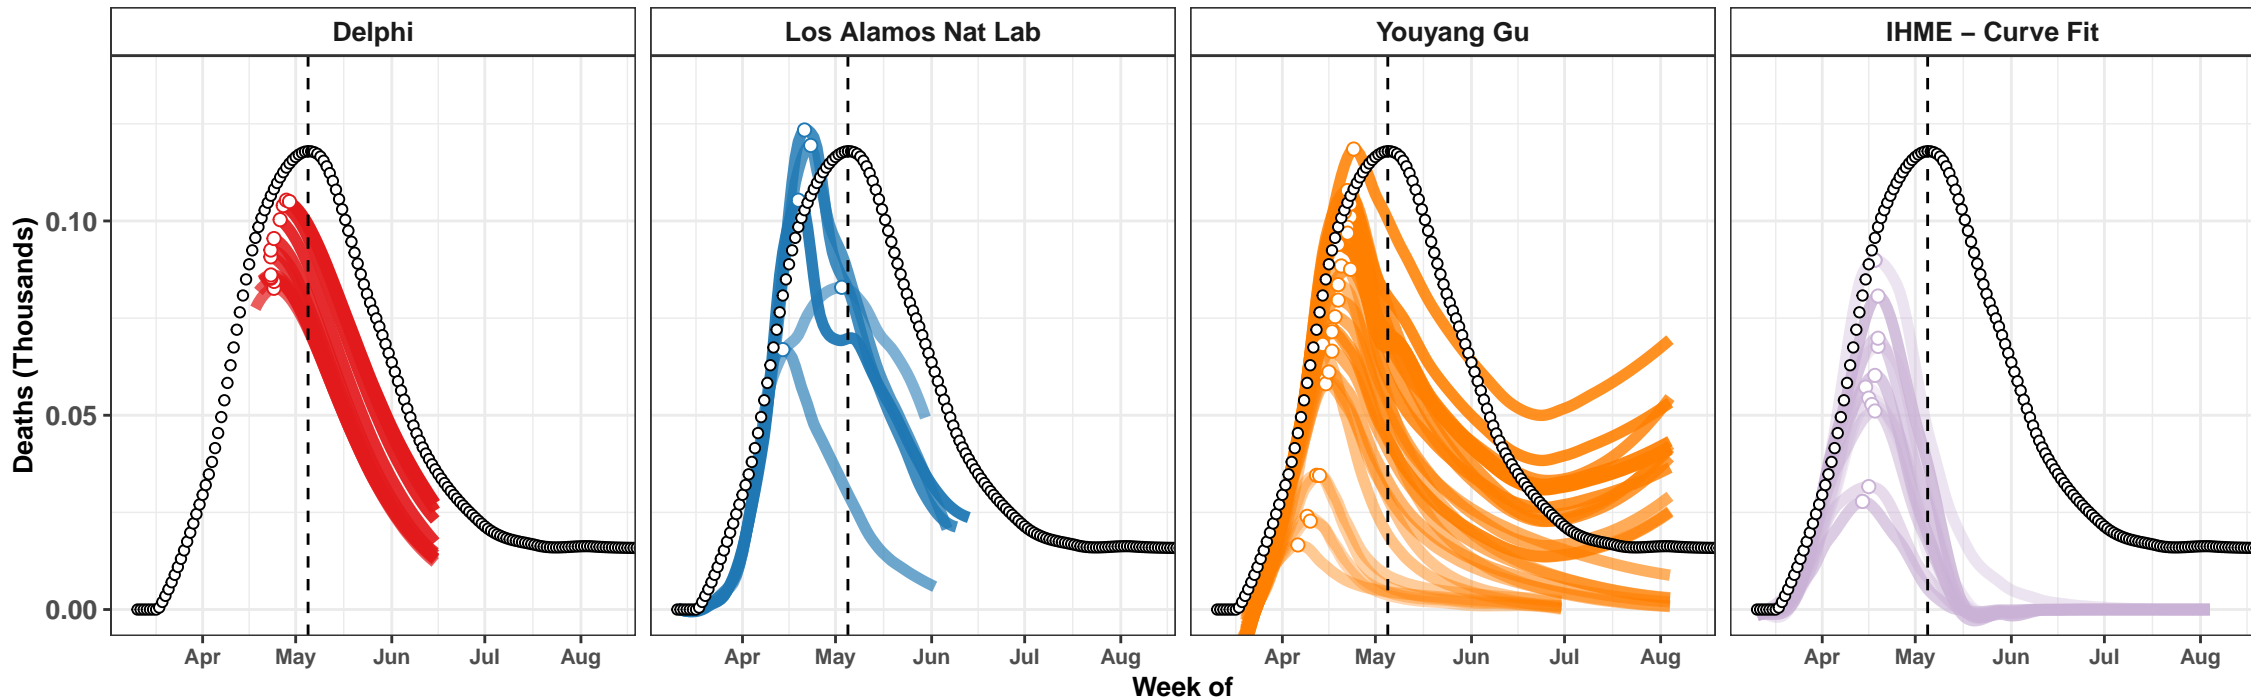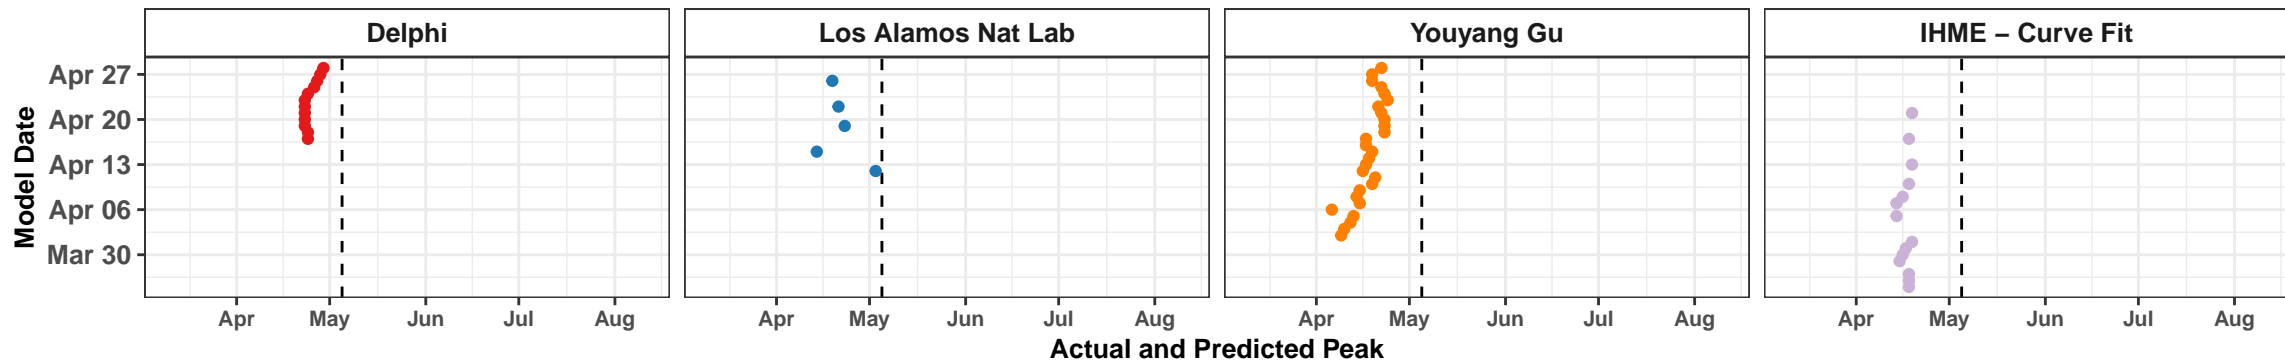

# Bolivia – Smoothed Daily Deaths

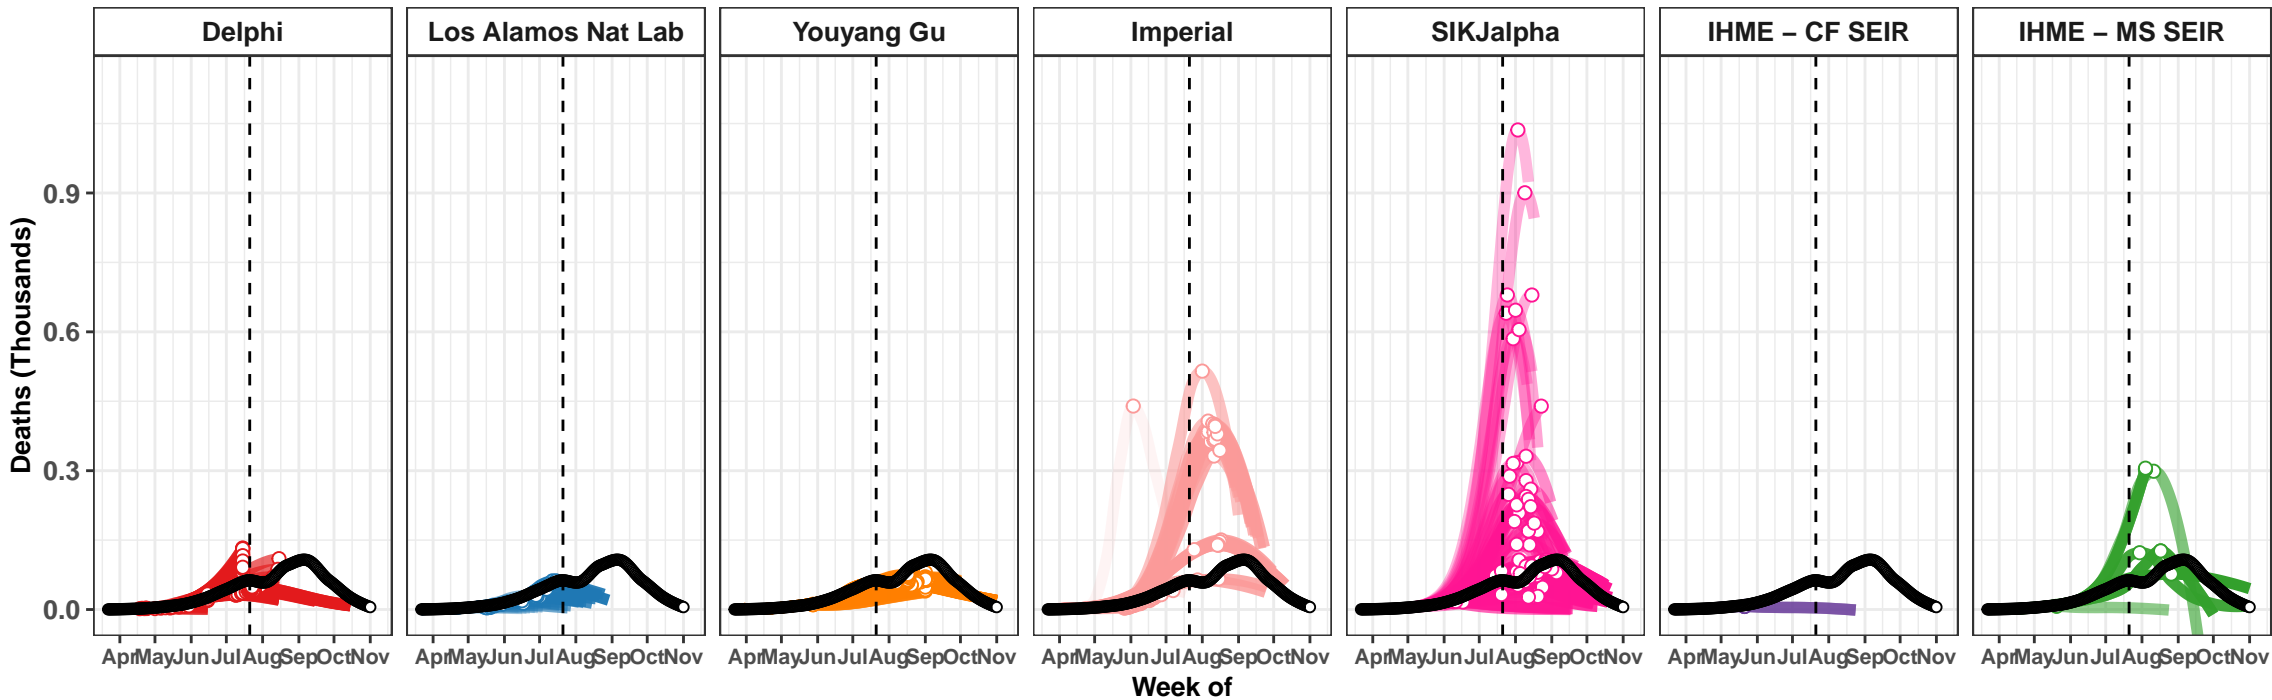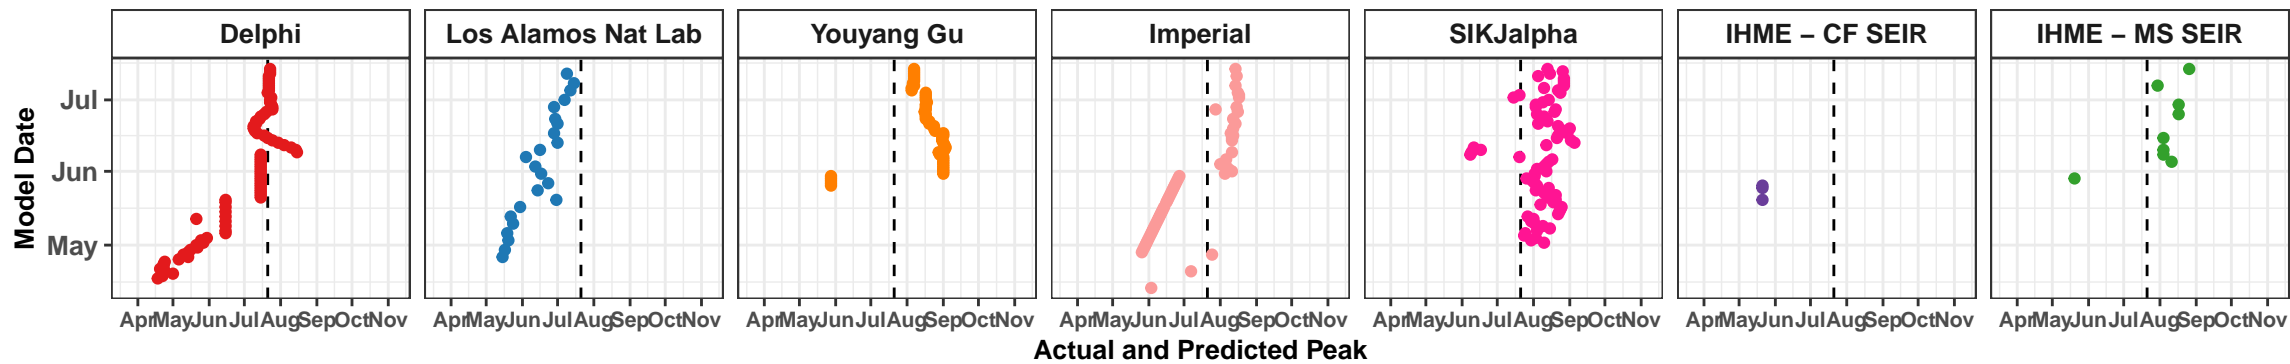

# Georgia – Smoothed Daily Deaths

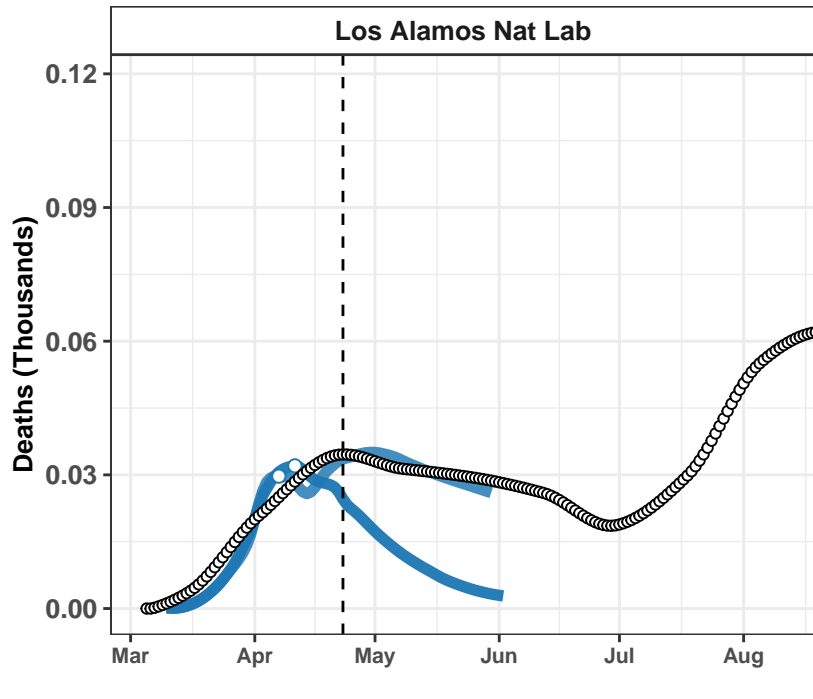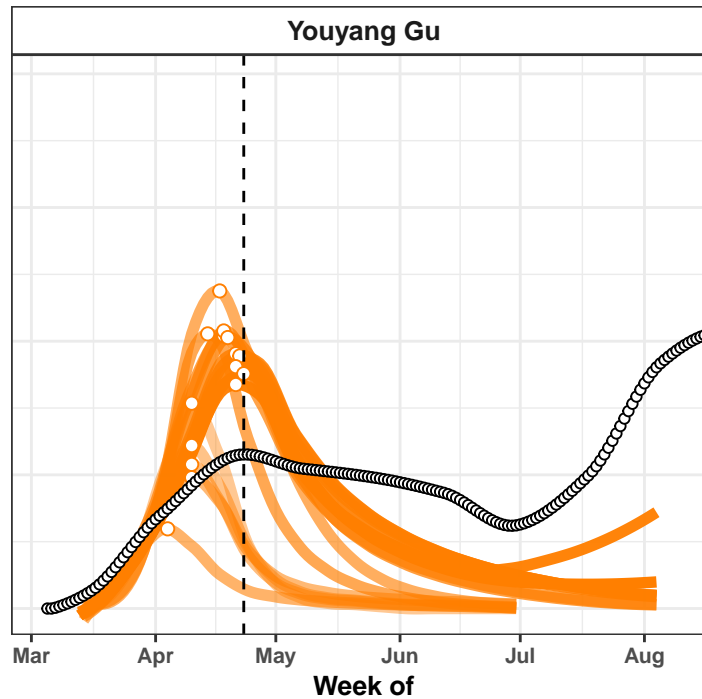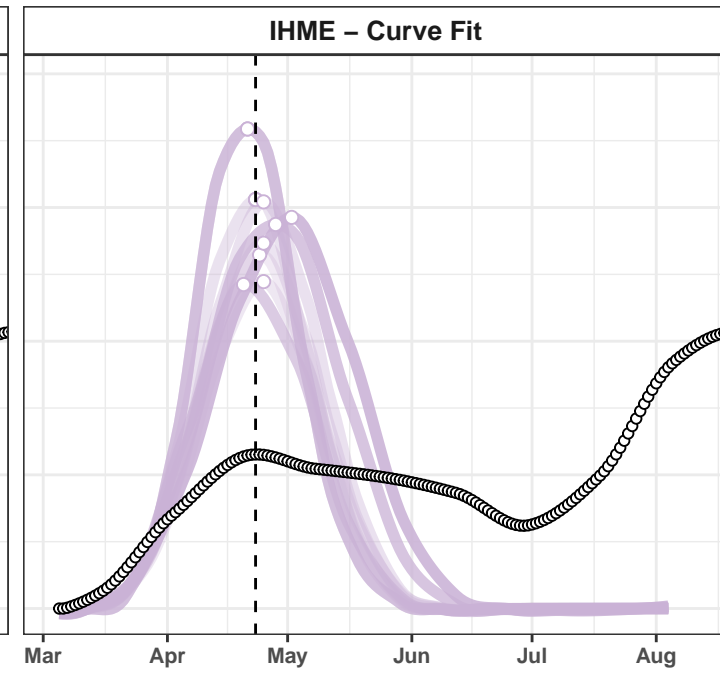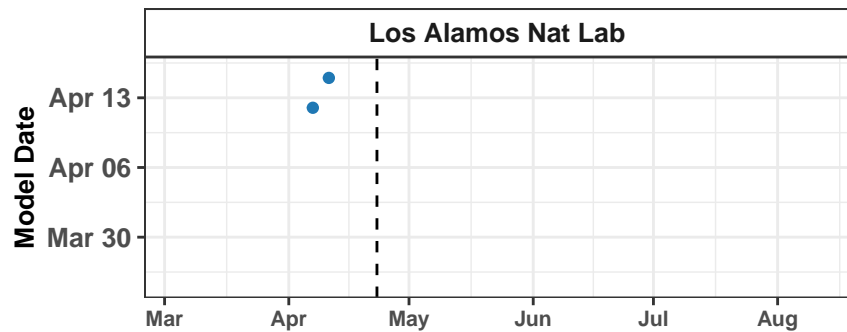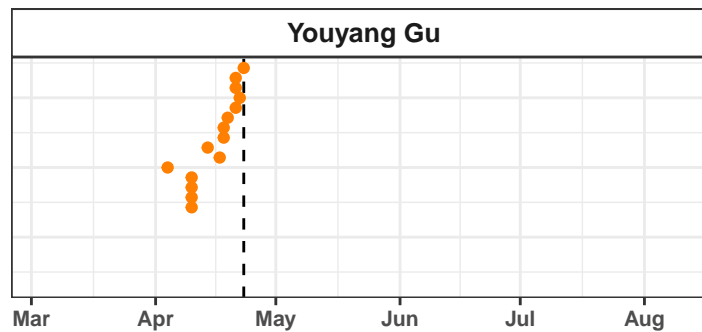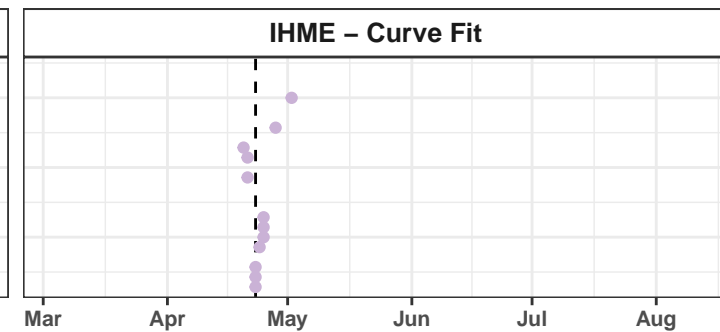

Actual and Predicted Peak

# Michigan – Smoothed Daily Deaths

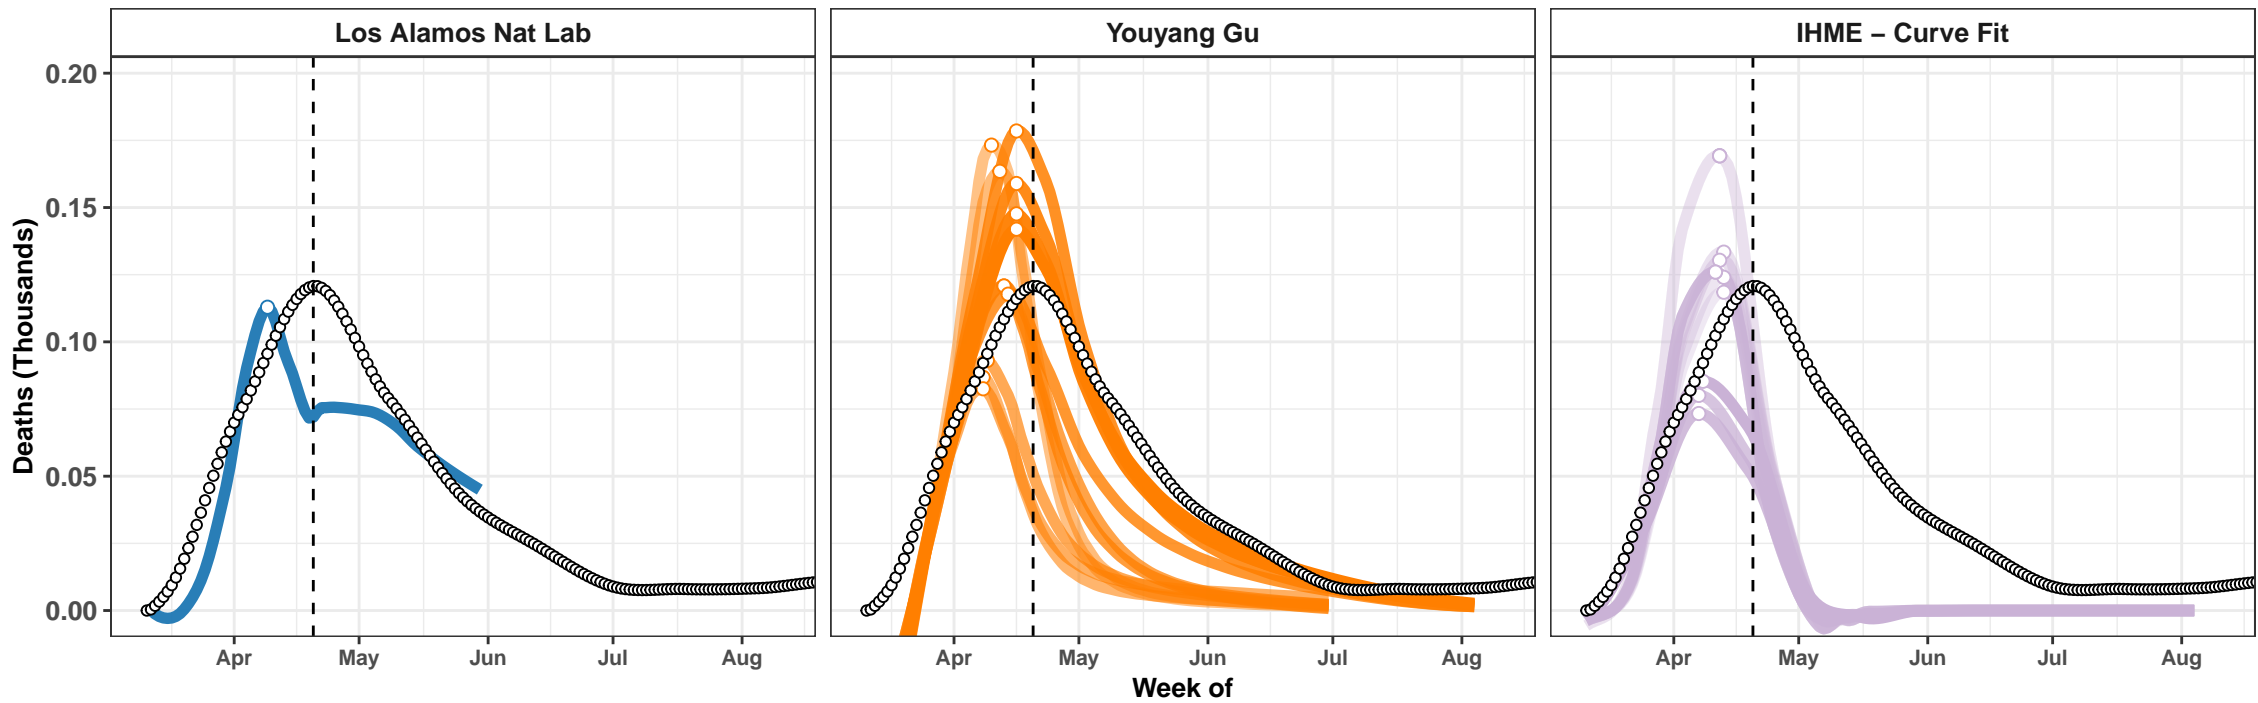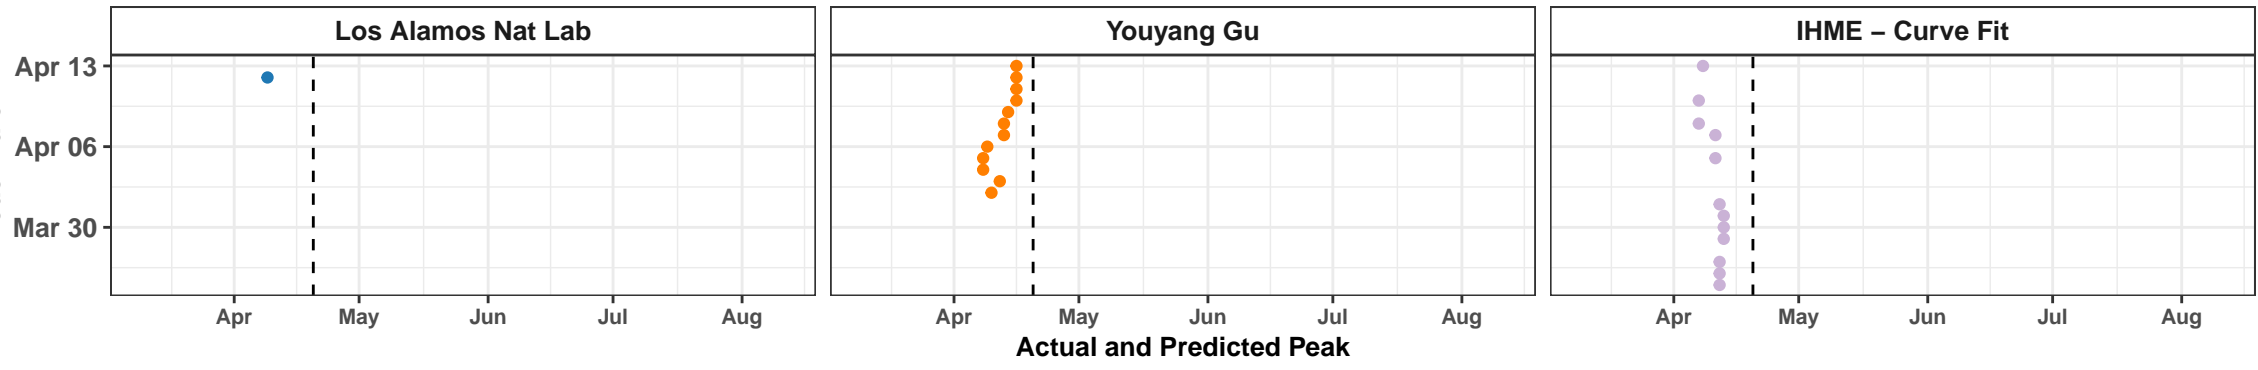

# Ukraine – Smoothed Daily Deaths

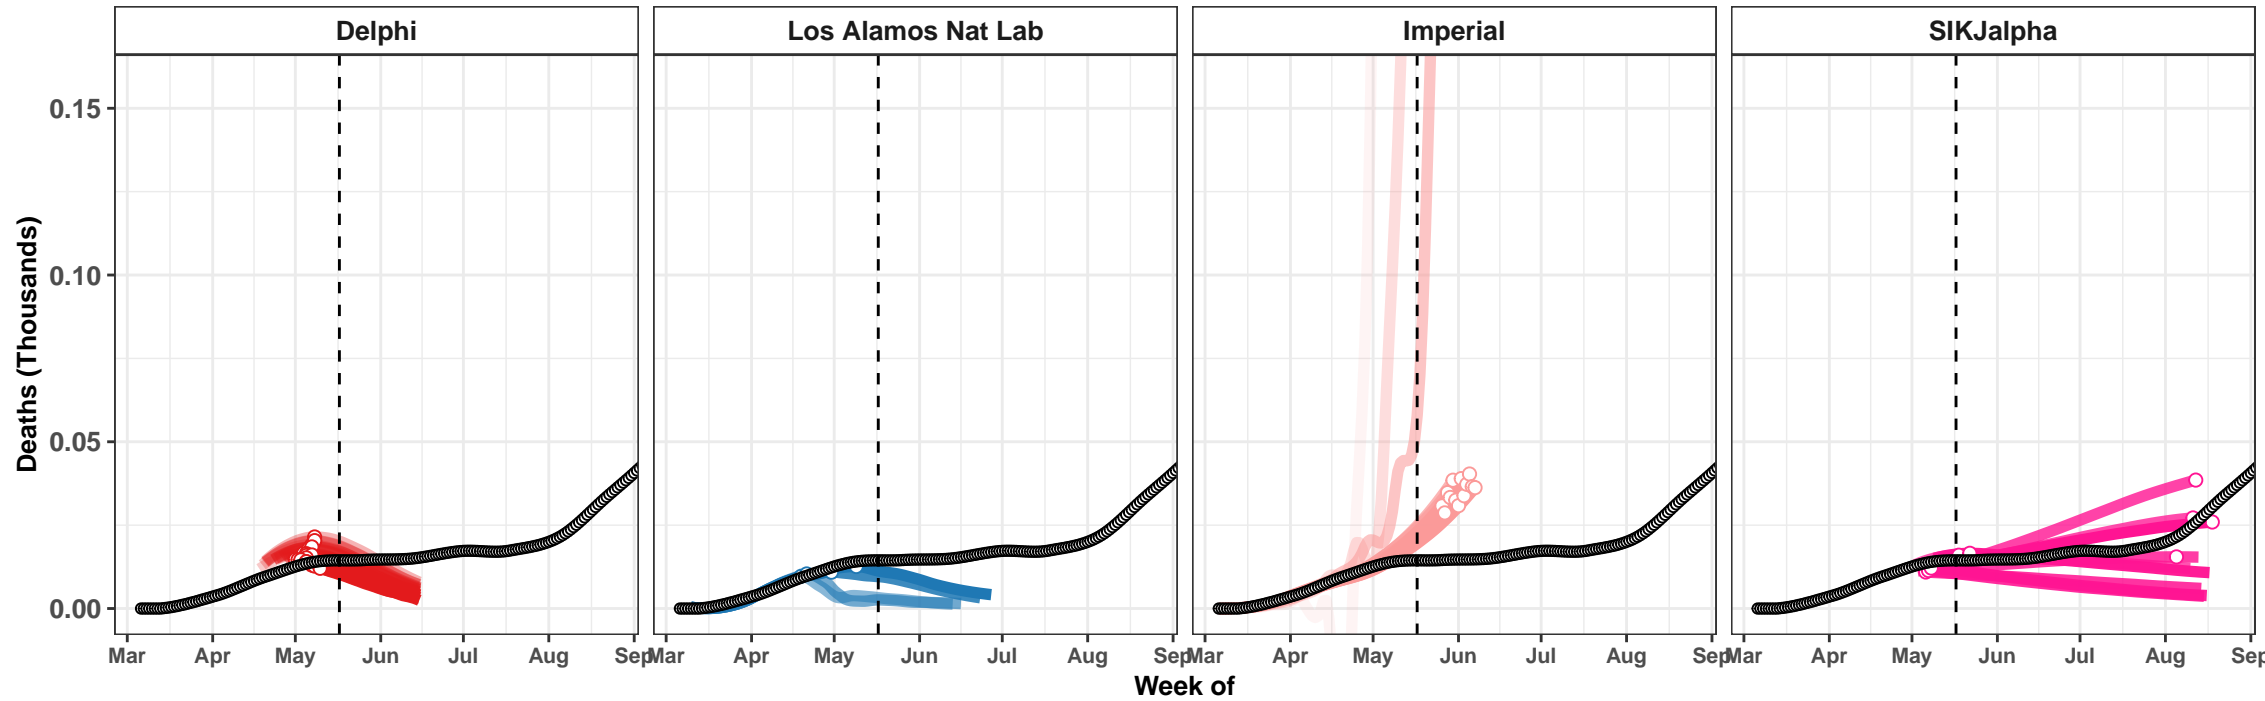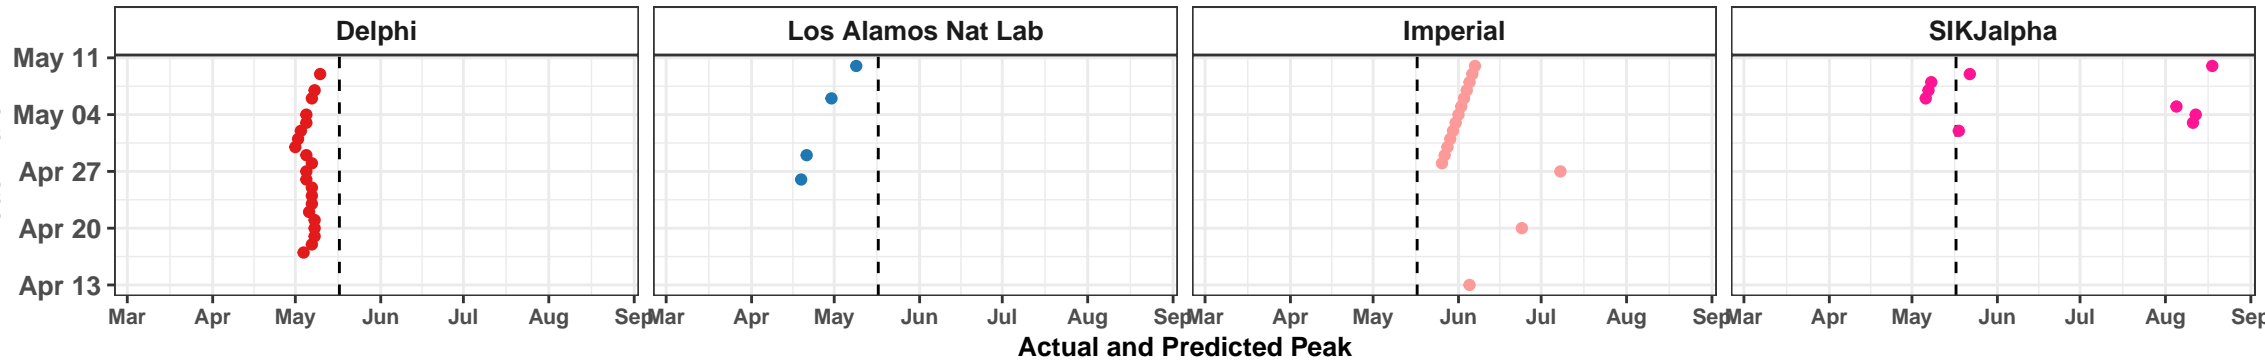

# Netherlands – Smoothed Daily Deaths

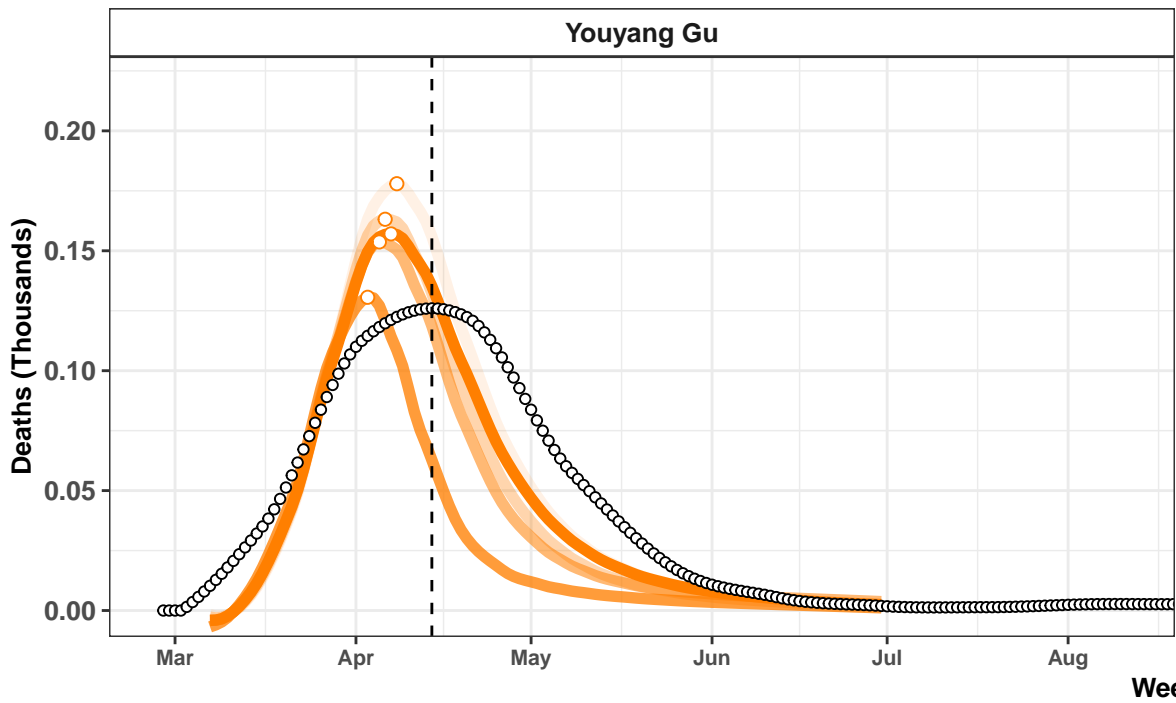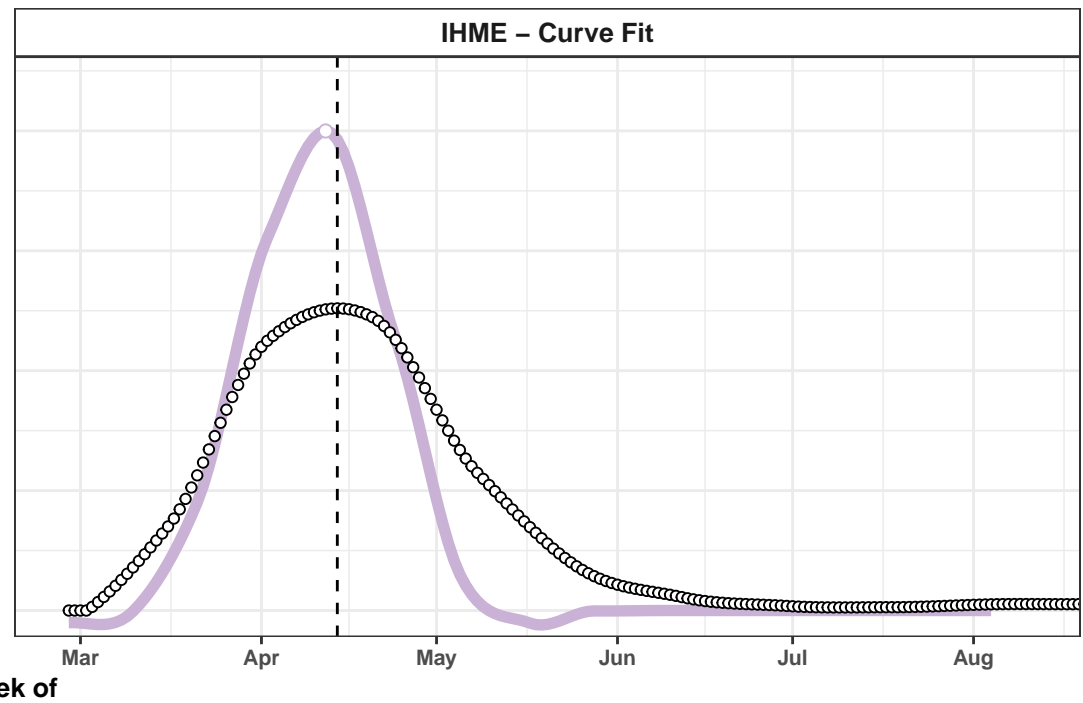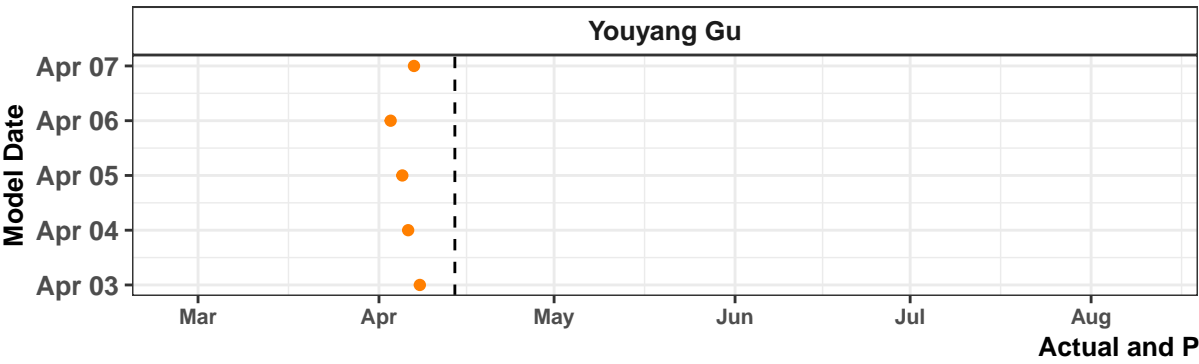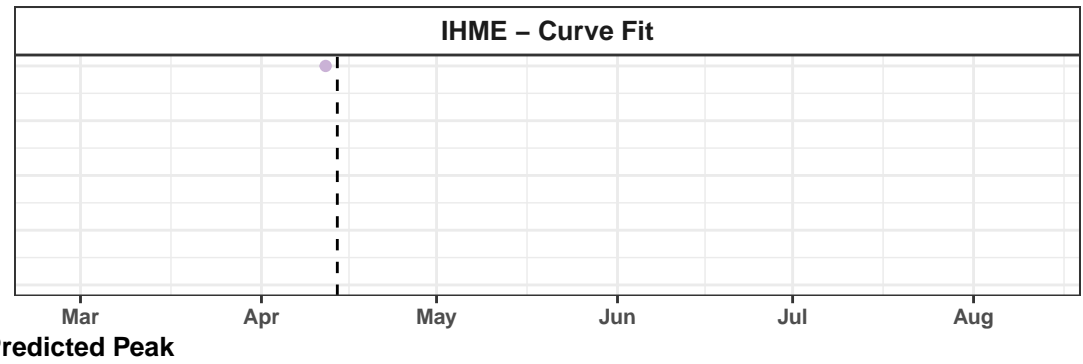



# Philippines – Smoothed Daily Deaths

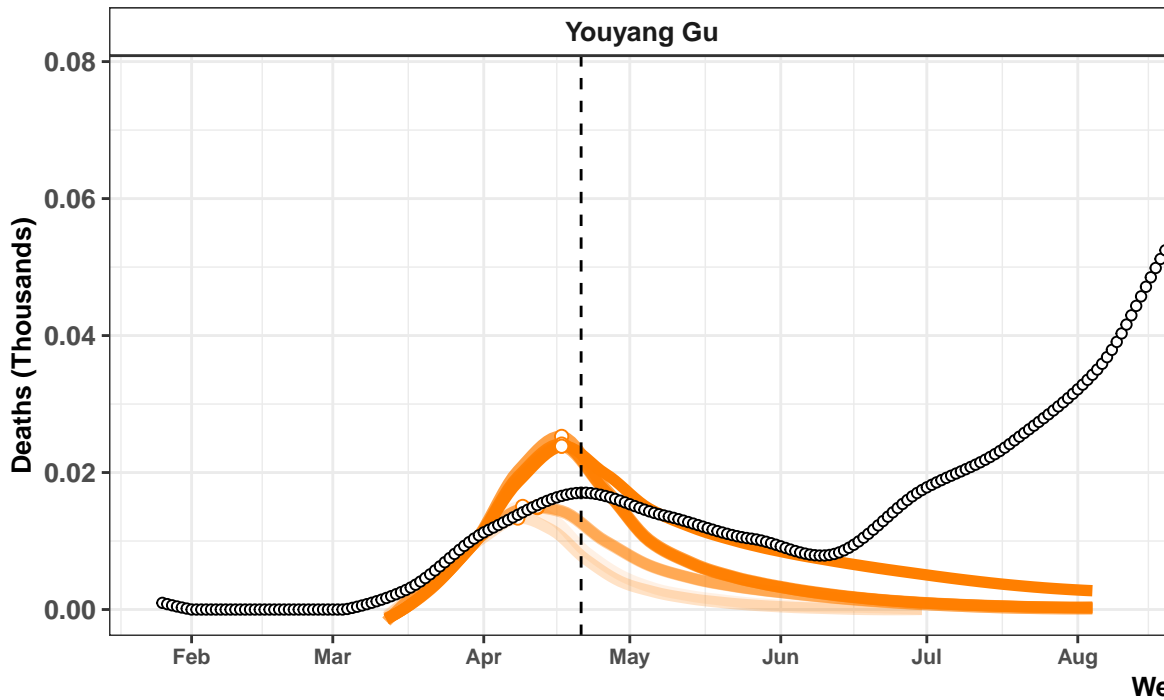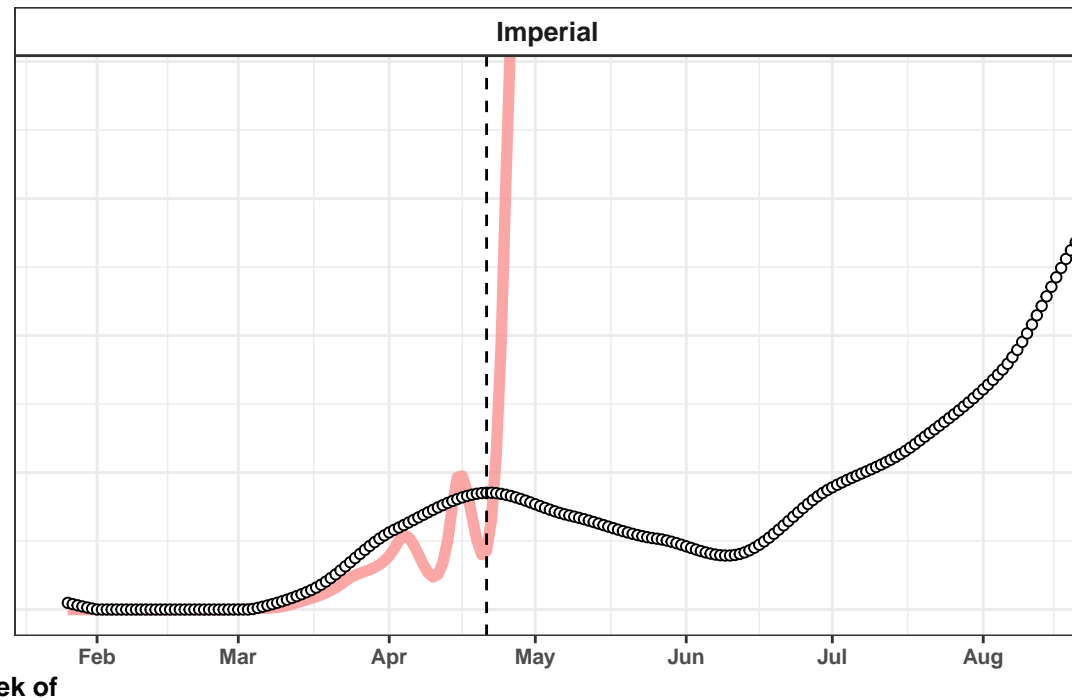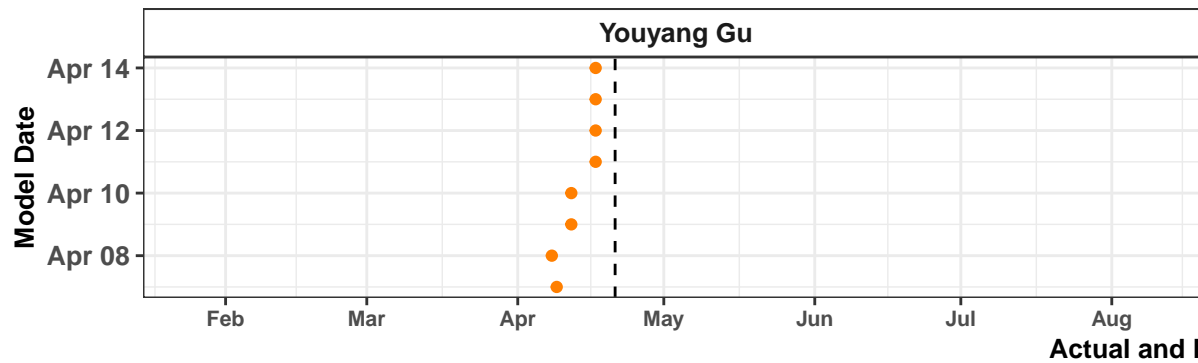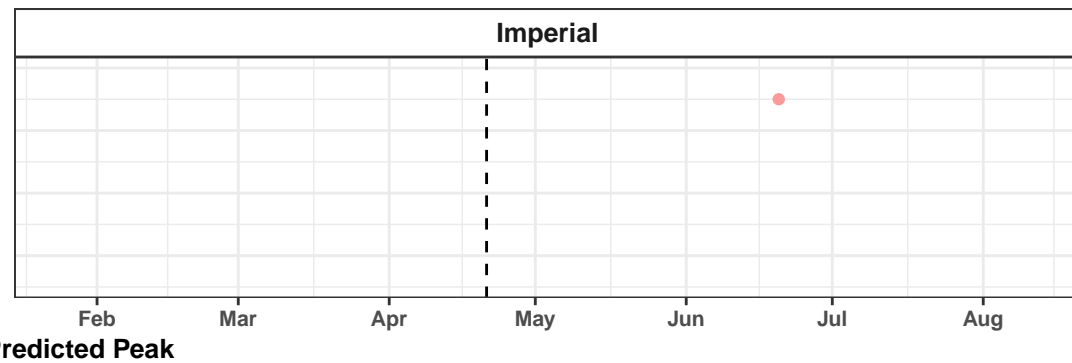

# Romania – Smoothed Daily Deaths

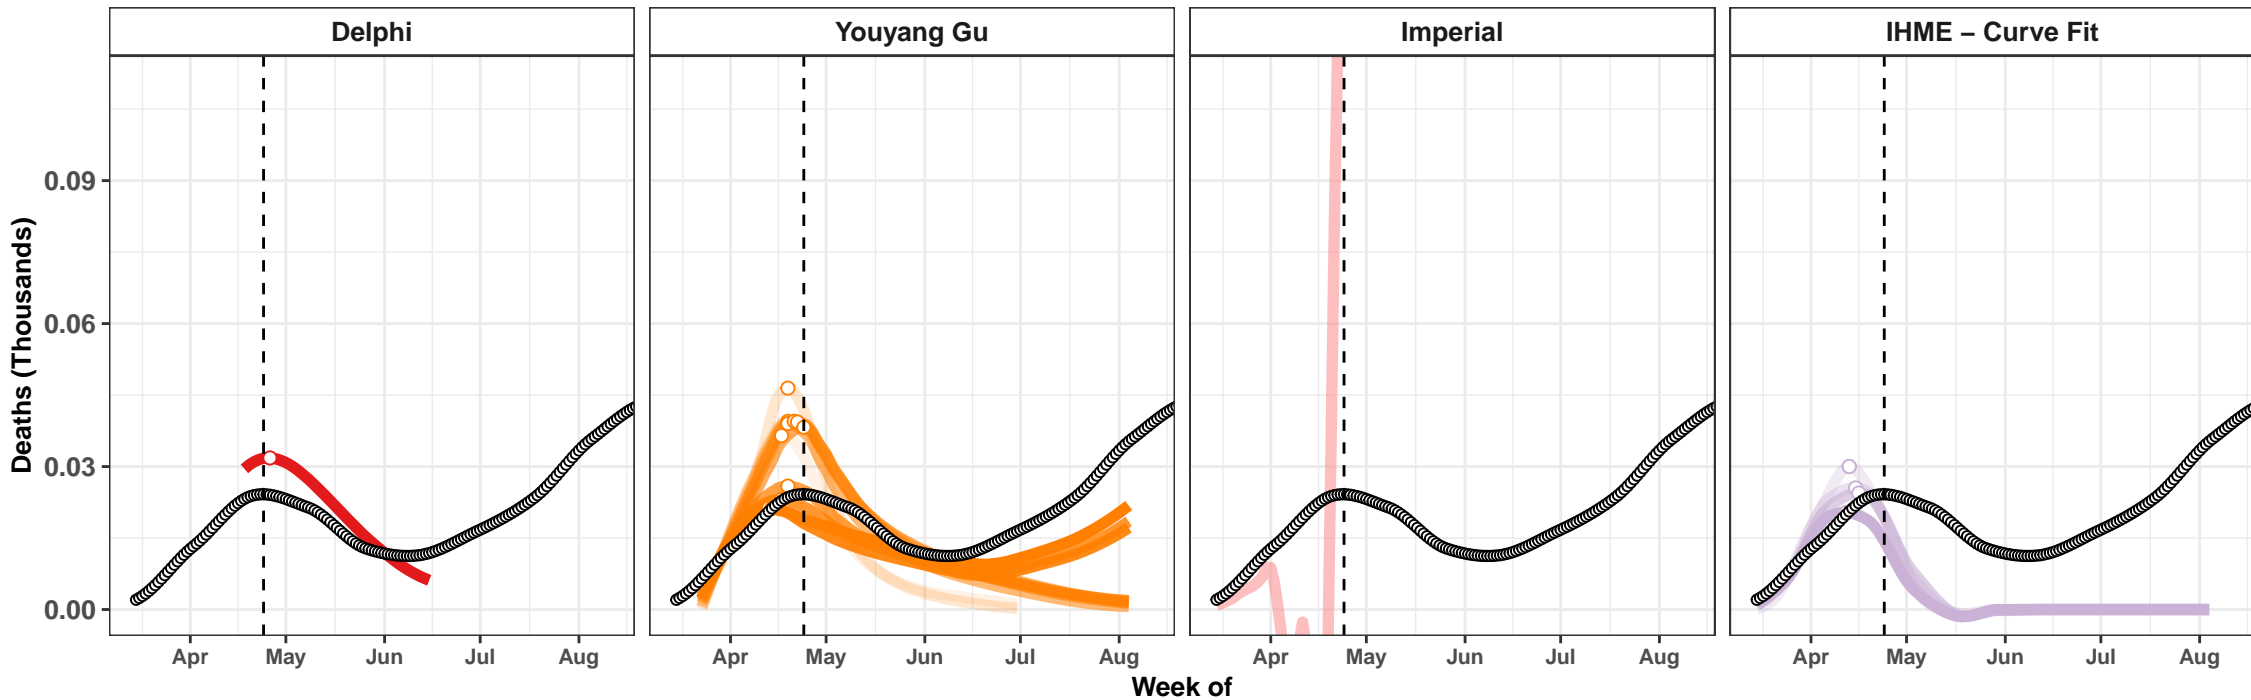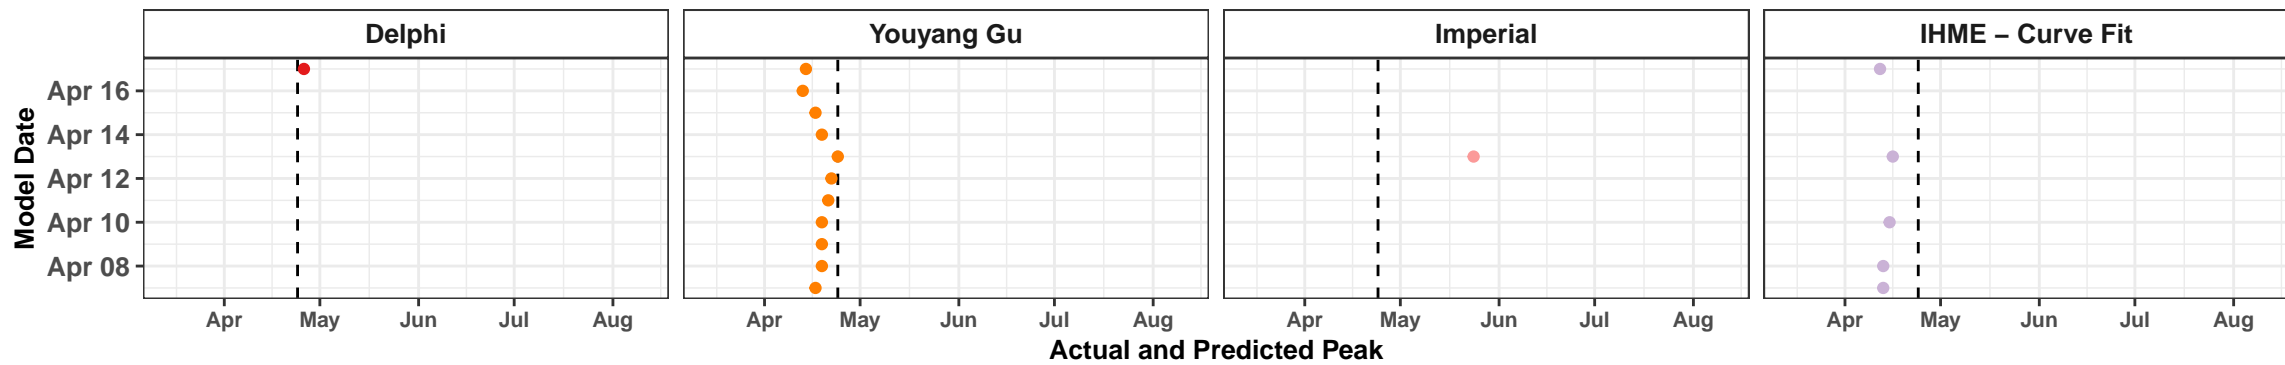

# Pakistan – Smoothed Daily Deaths

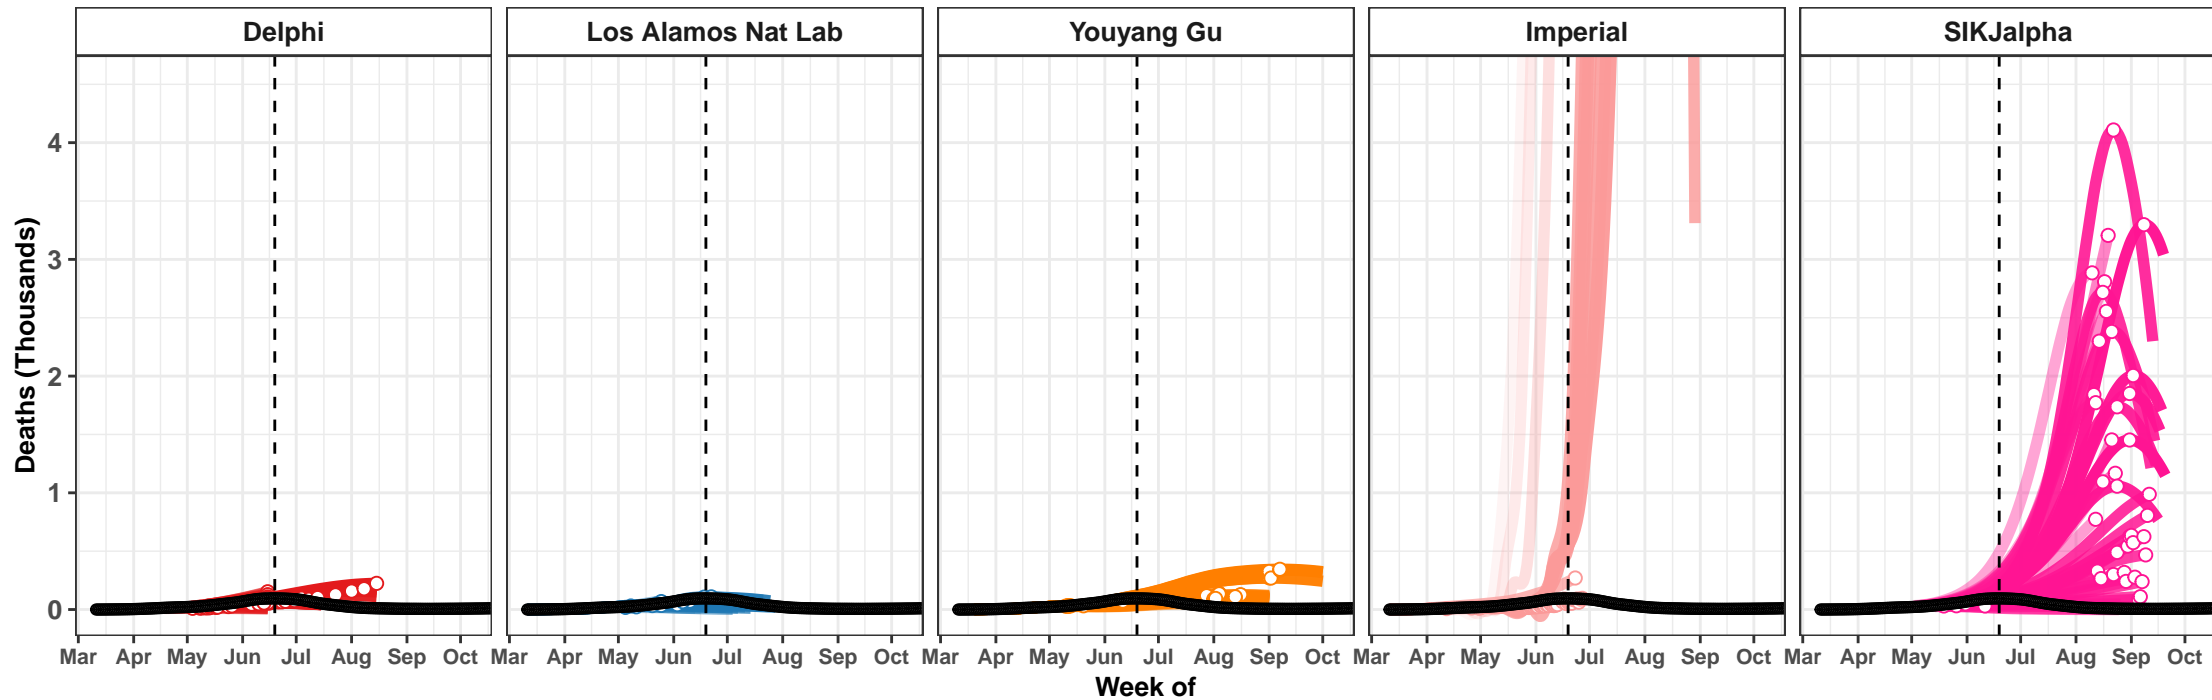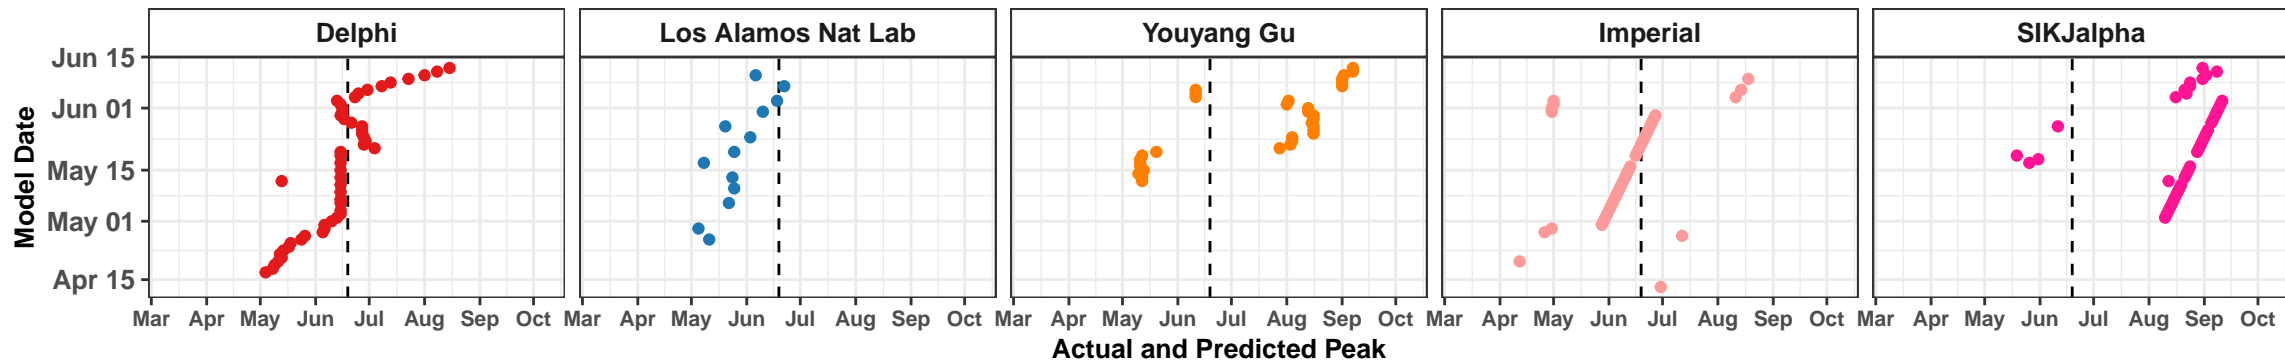

# Egypt – Smoothed Daily Deaths

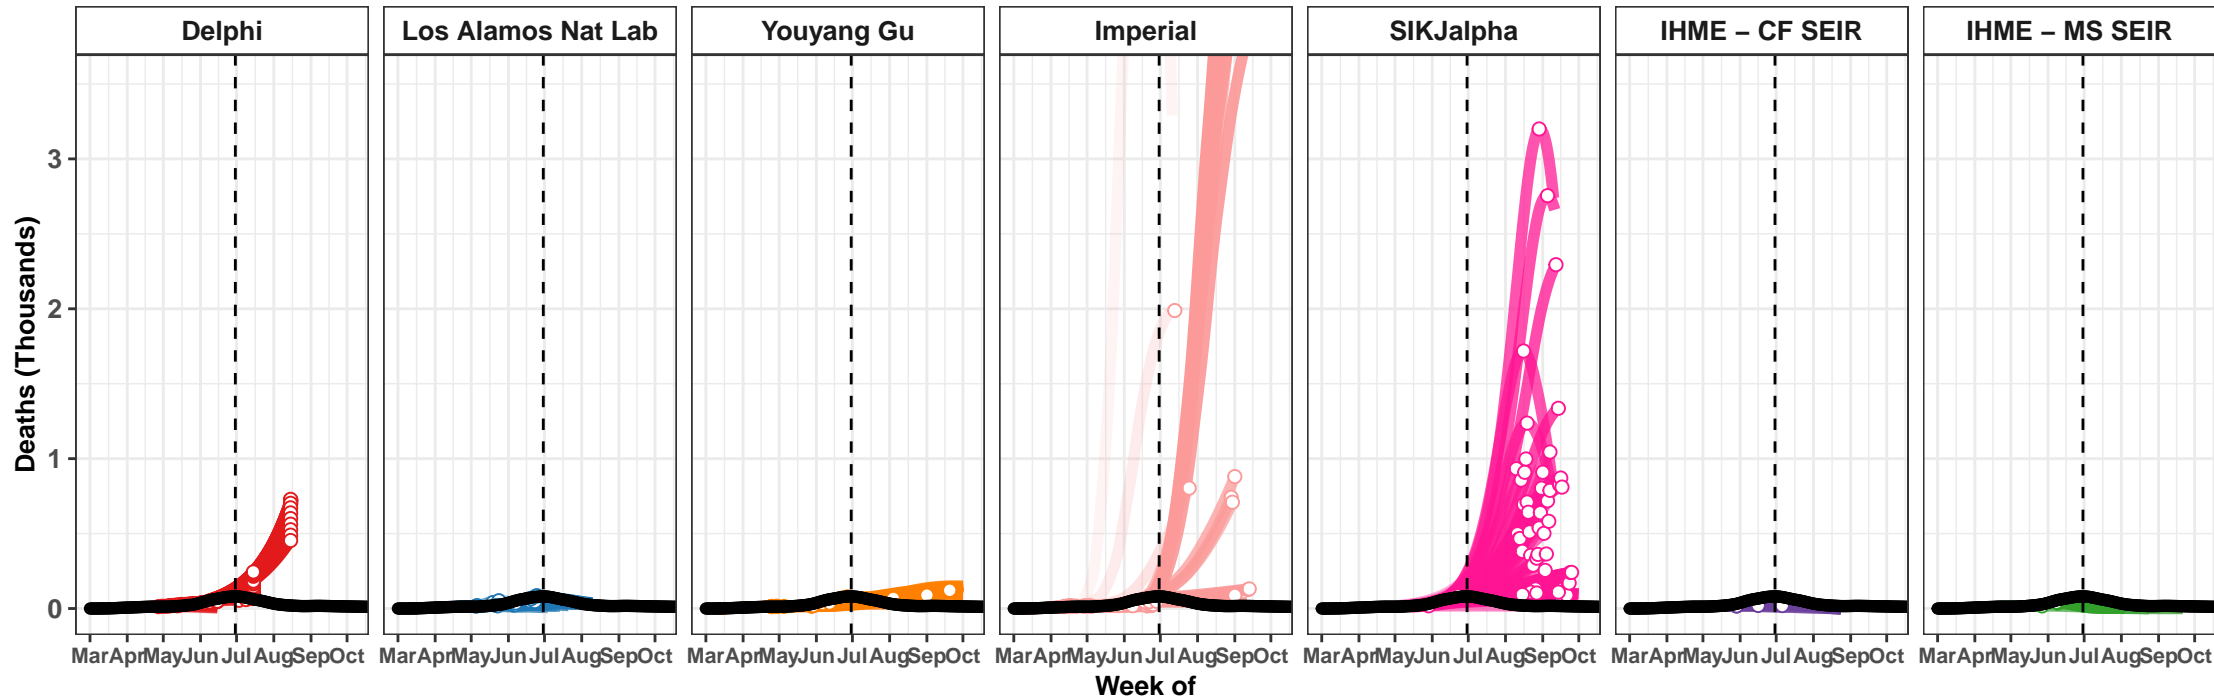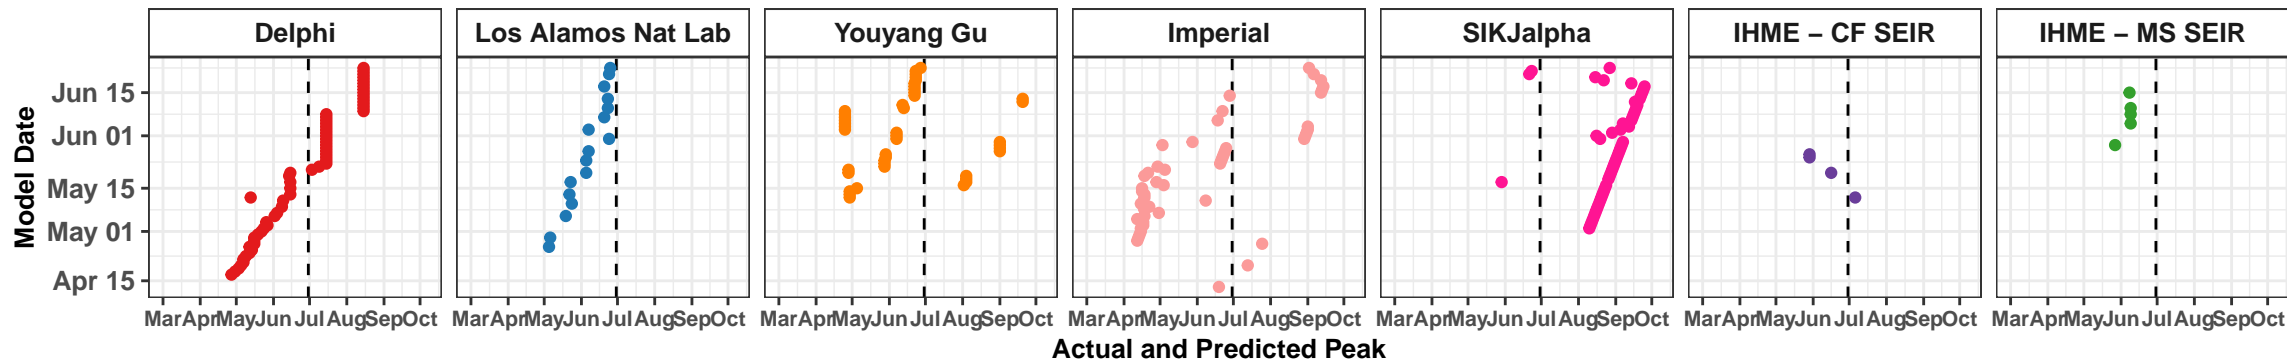

# Arizona – Smoothed Daily Deaths

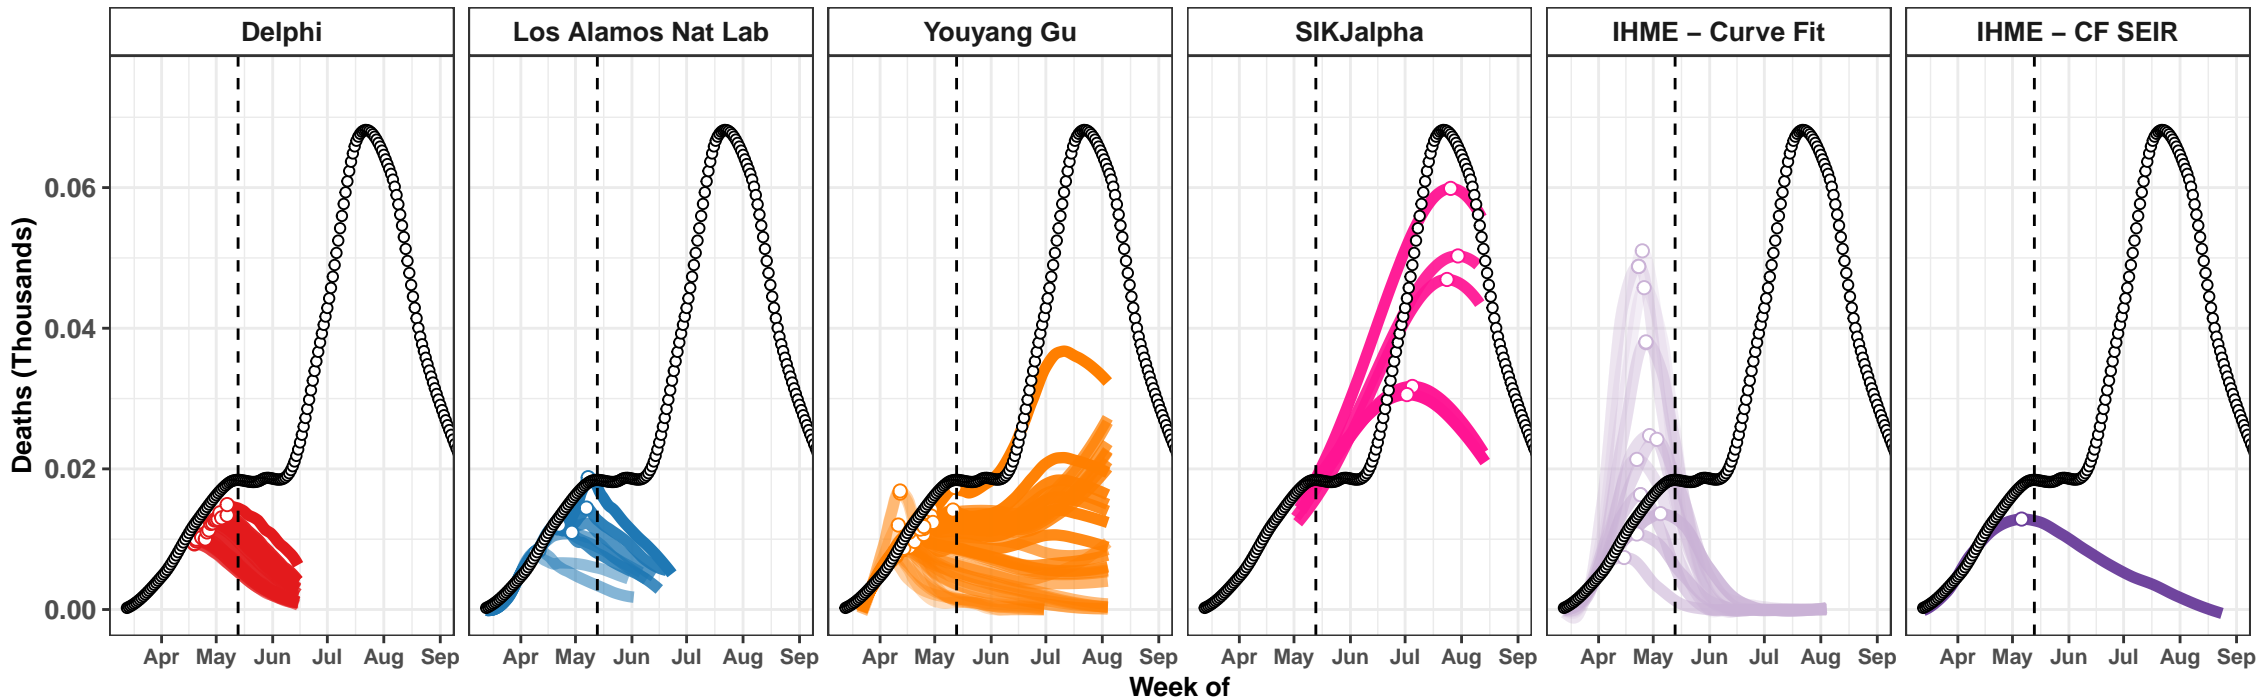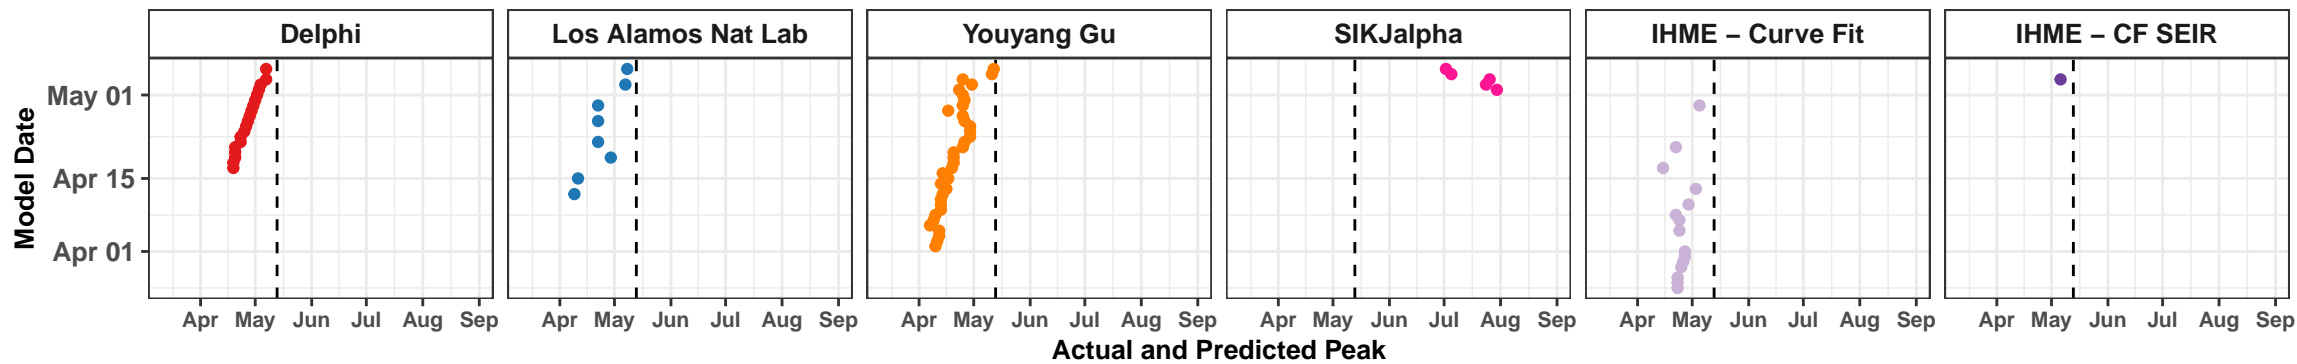

# Bangladesh – Smoothed Daily Deaths

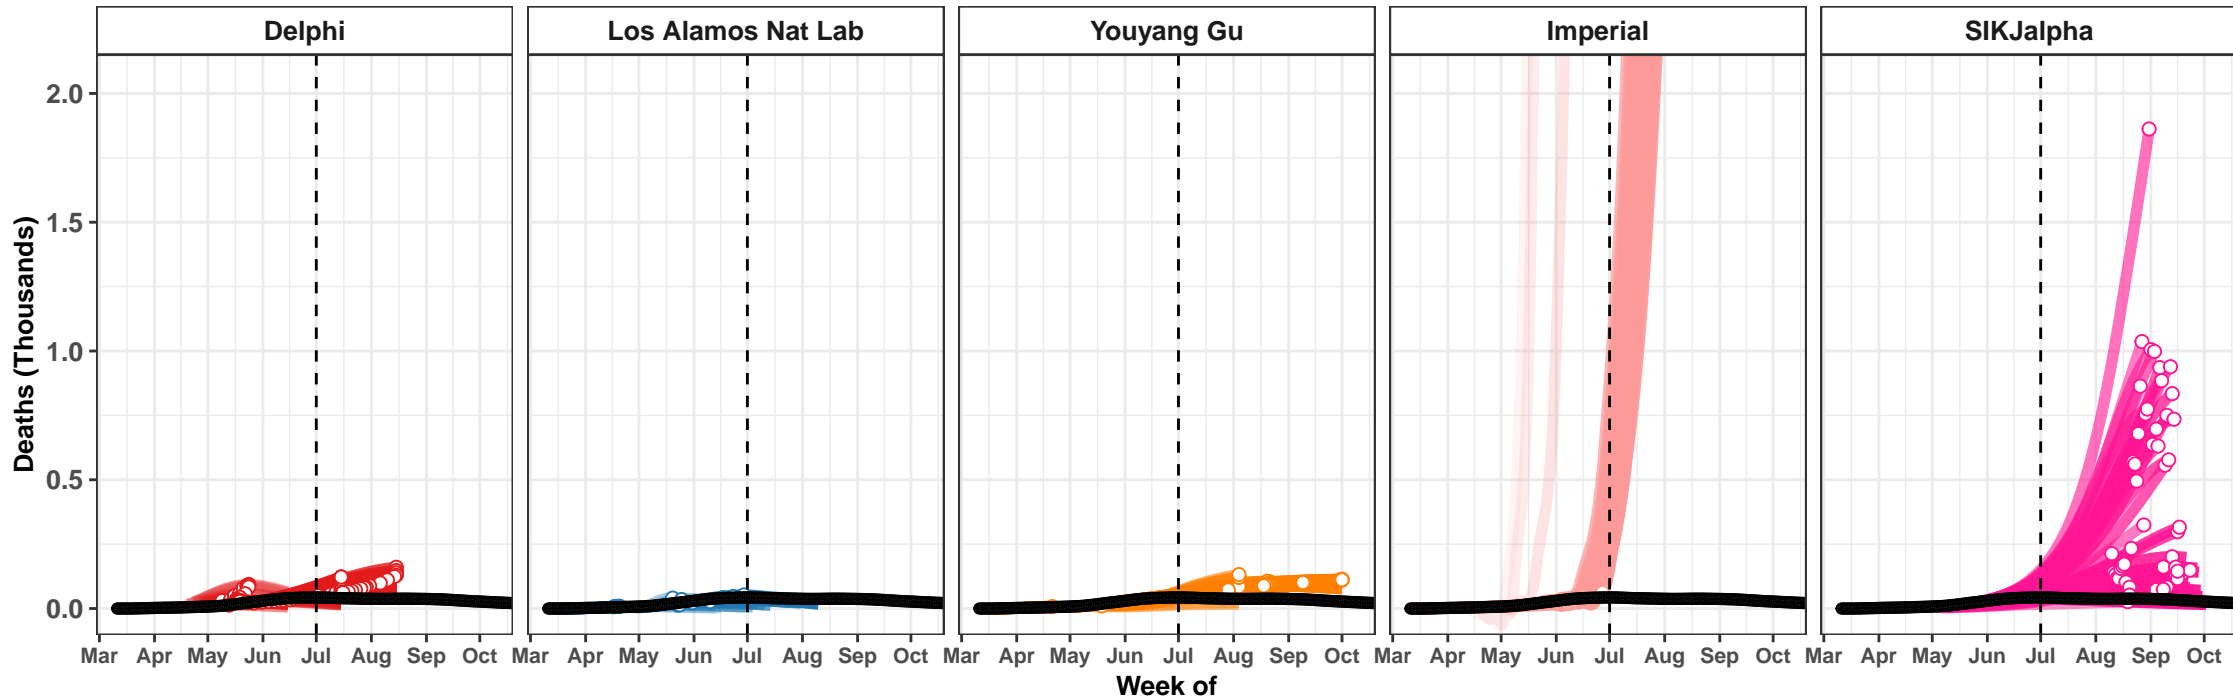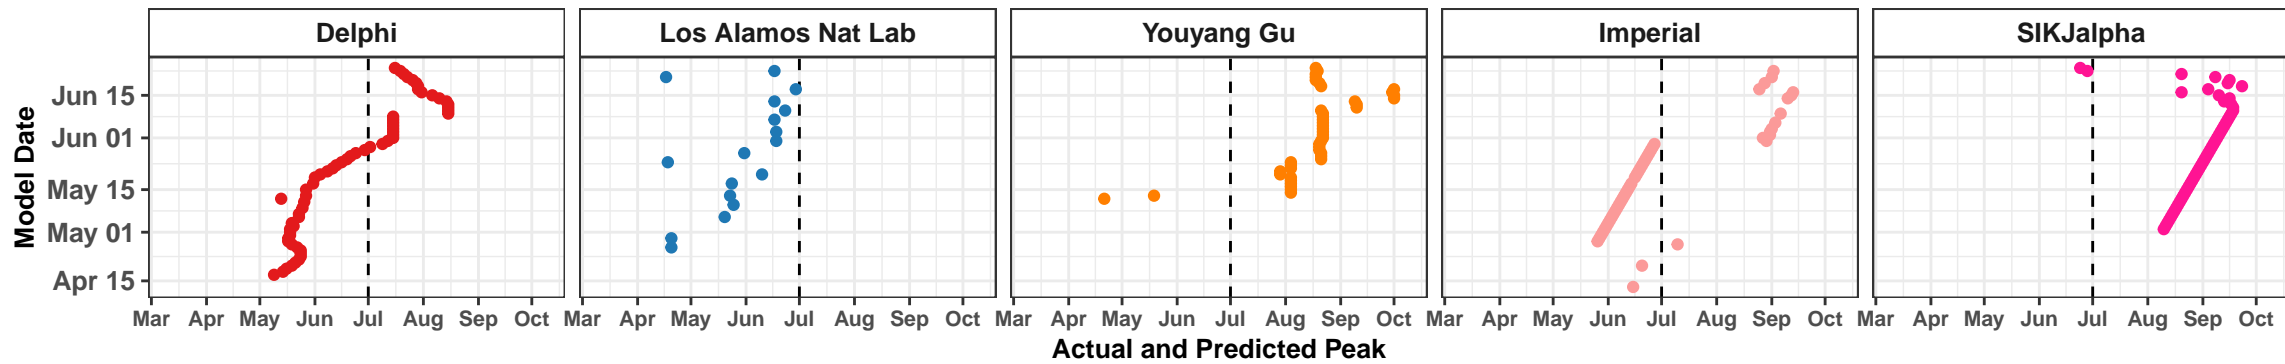

# Sweden – Smoothed Daily Deaths

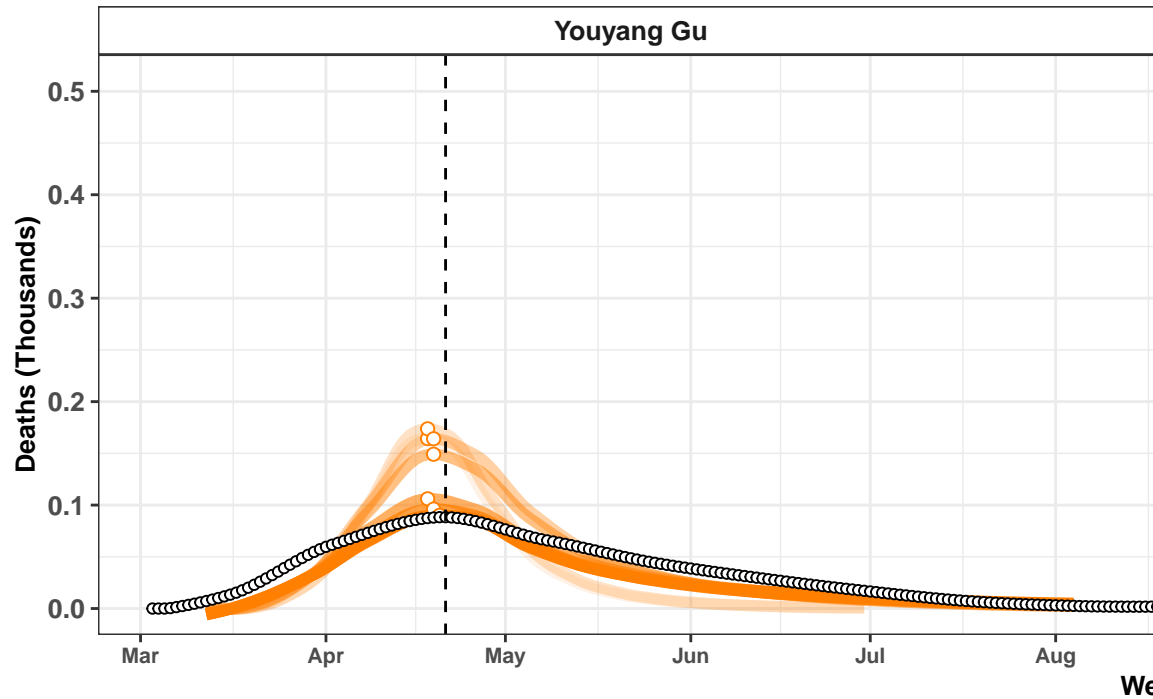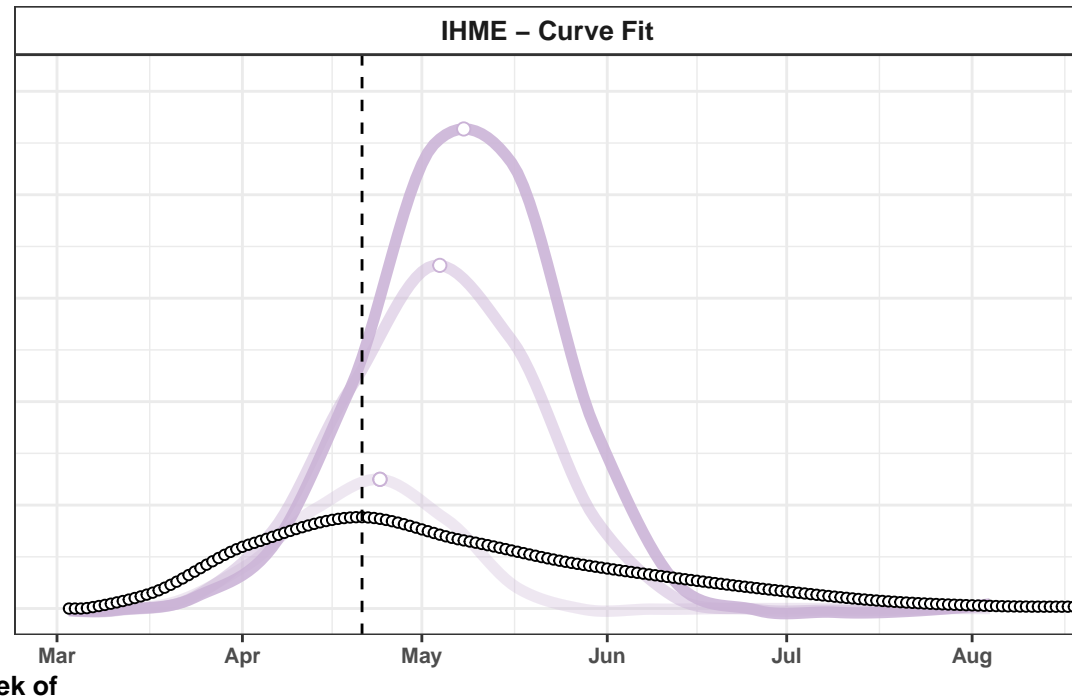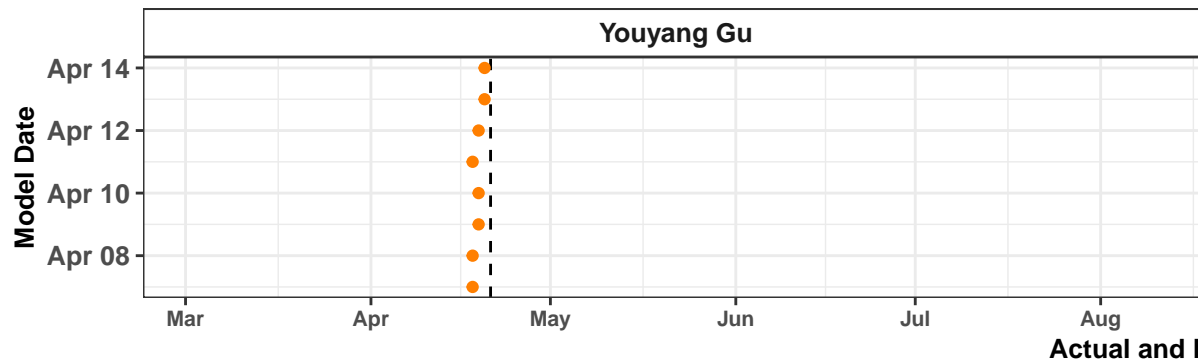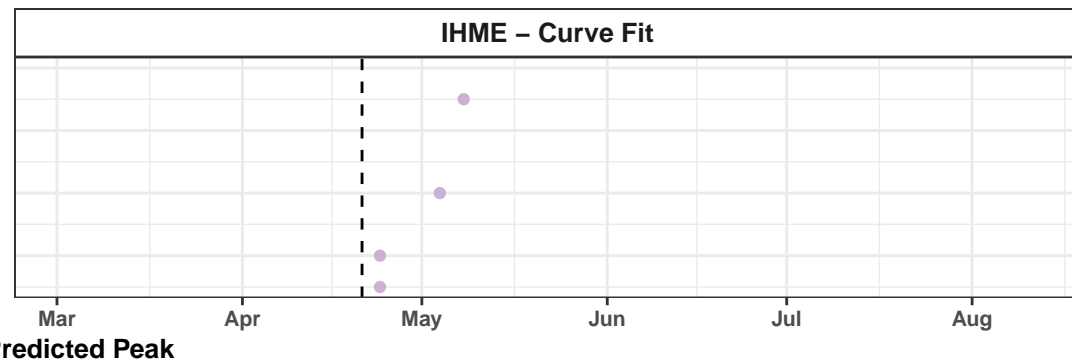

# Louisiana – Smoothed Daily Deaths

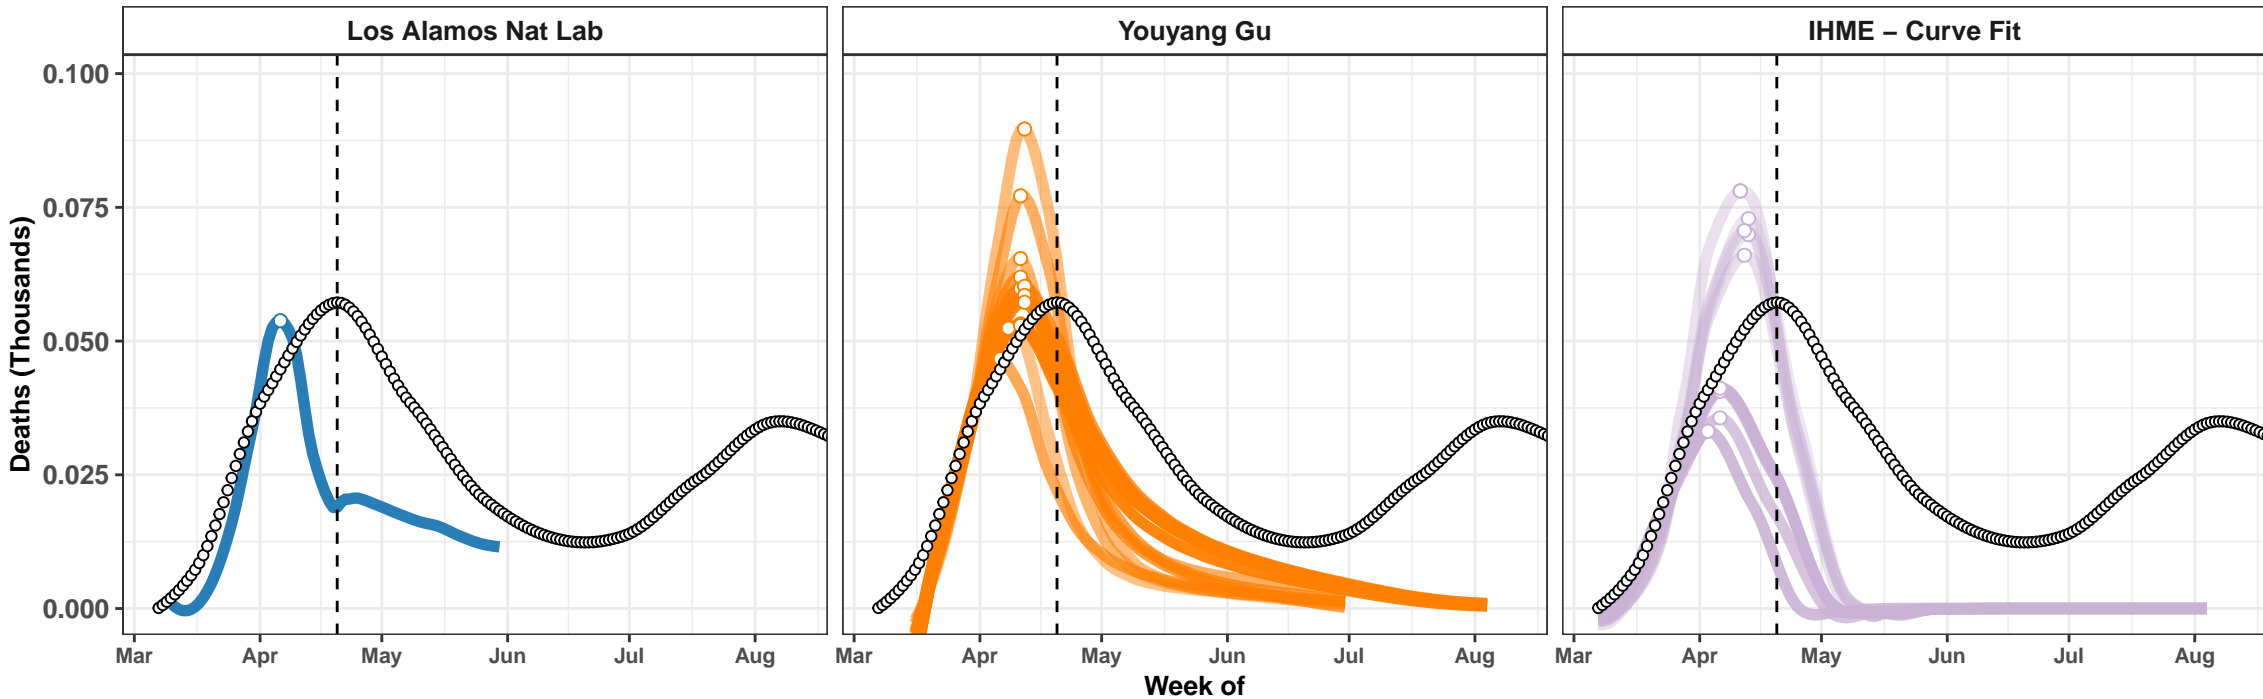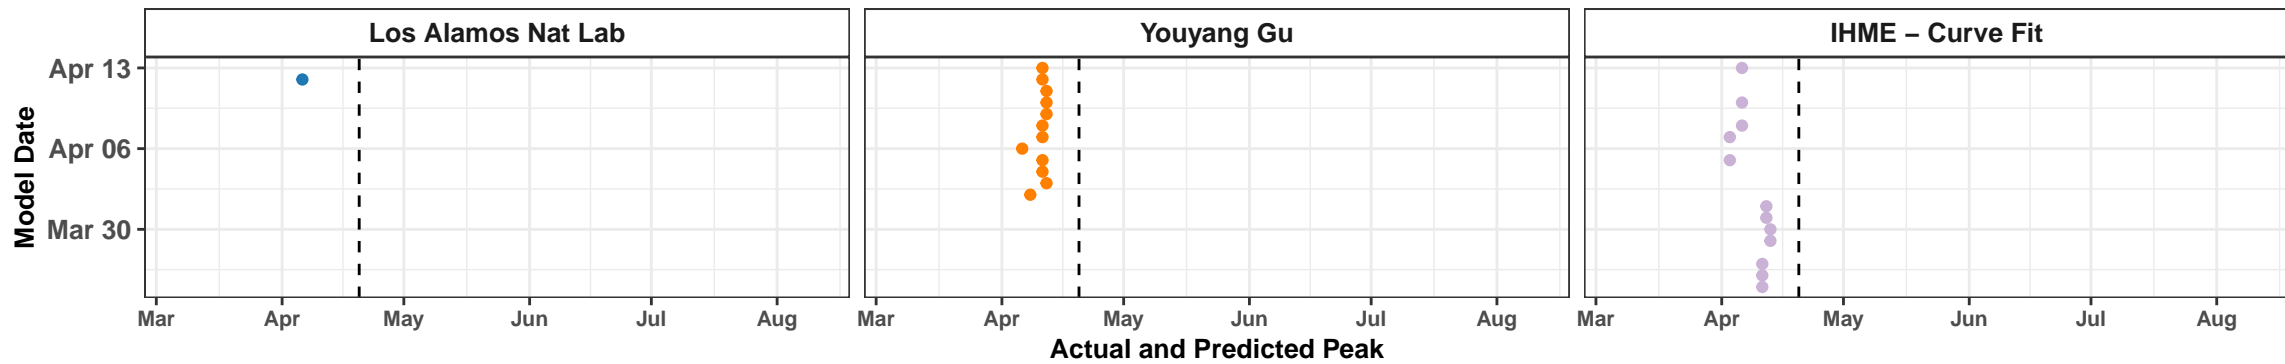



# Poland – Smoothed Daily Deaths

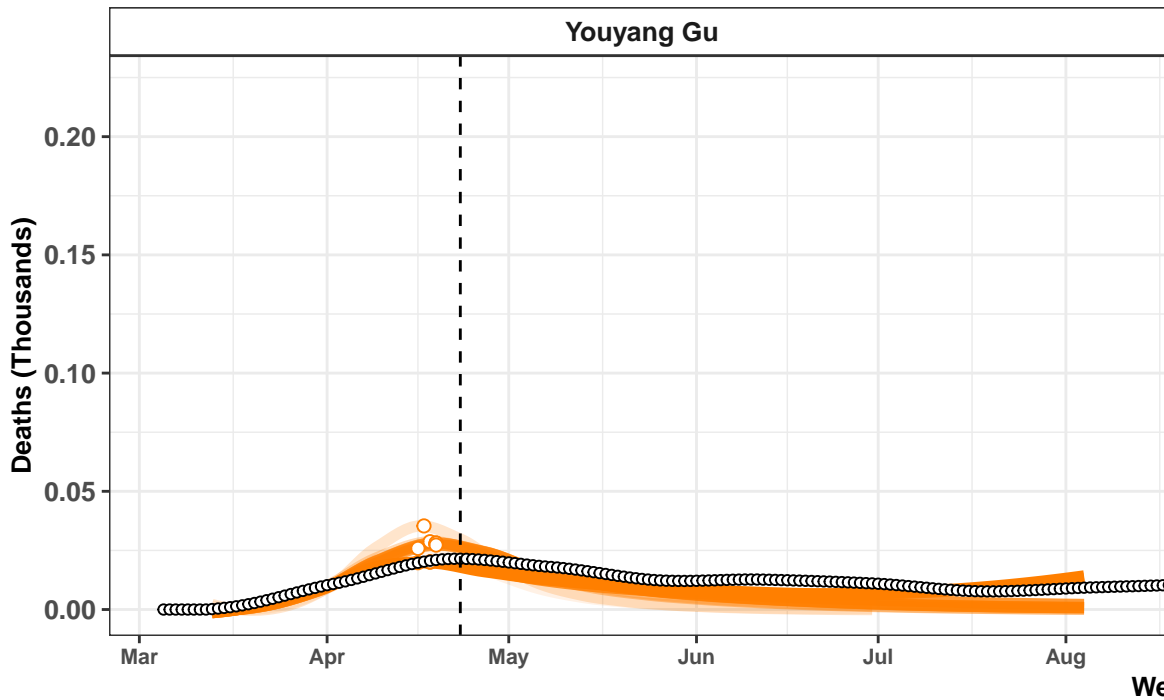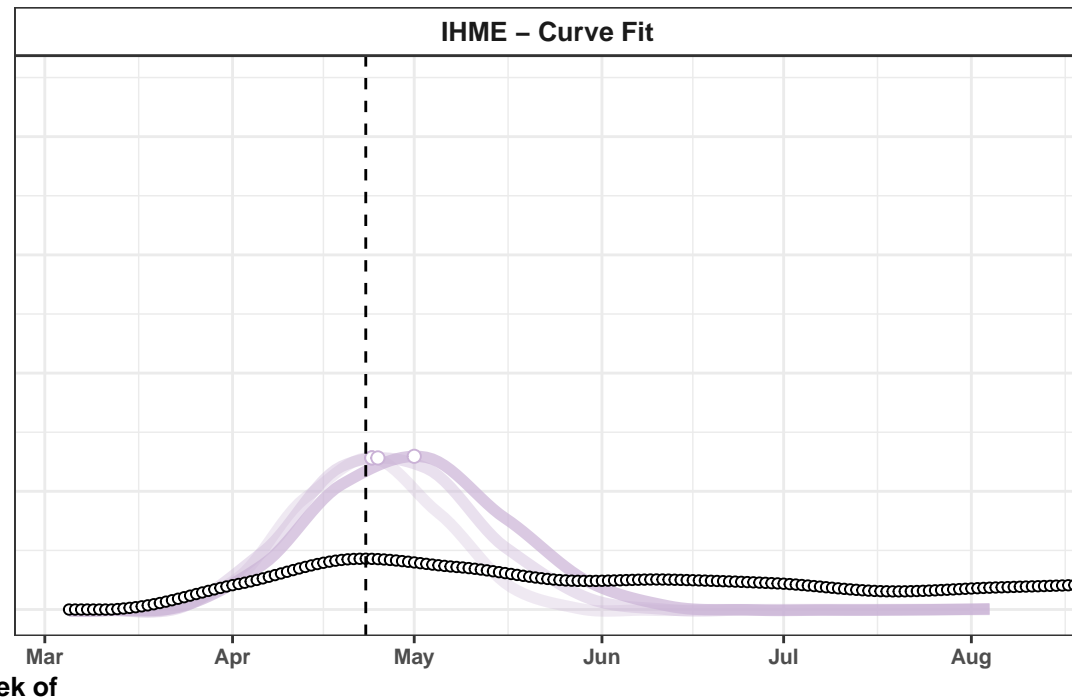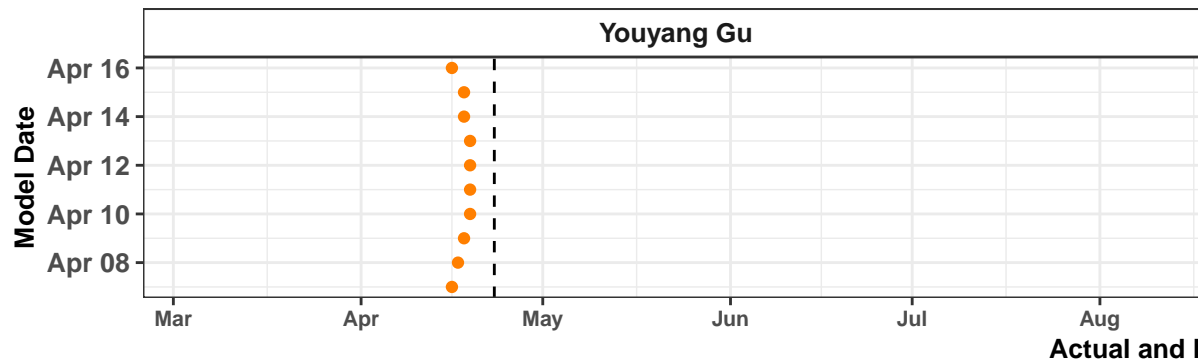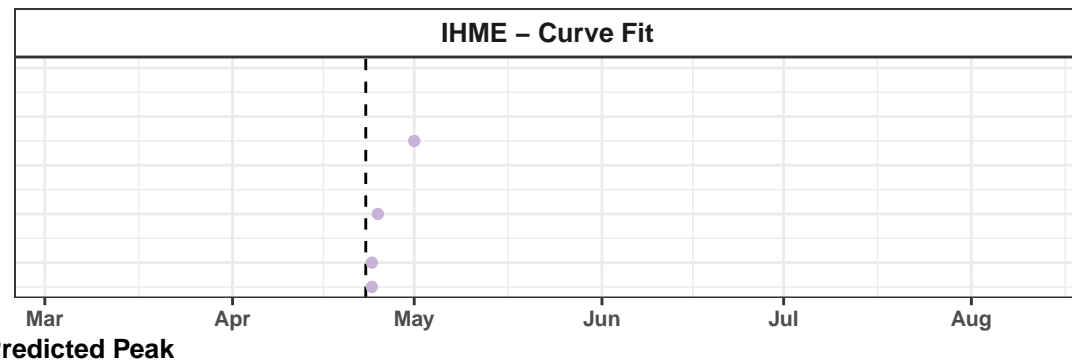

# Saudi Arabia – Smoothed Daily Deaths

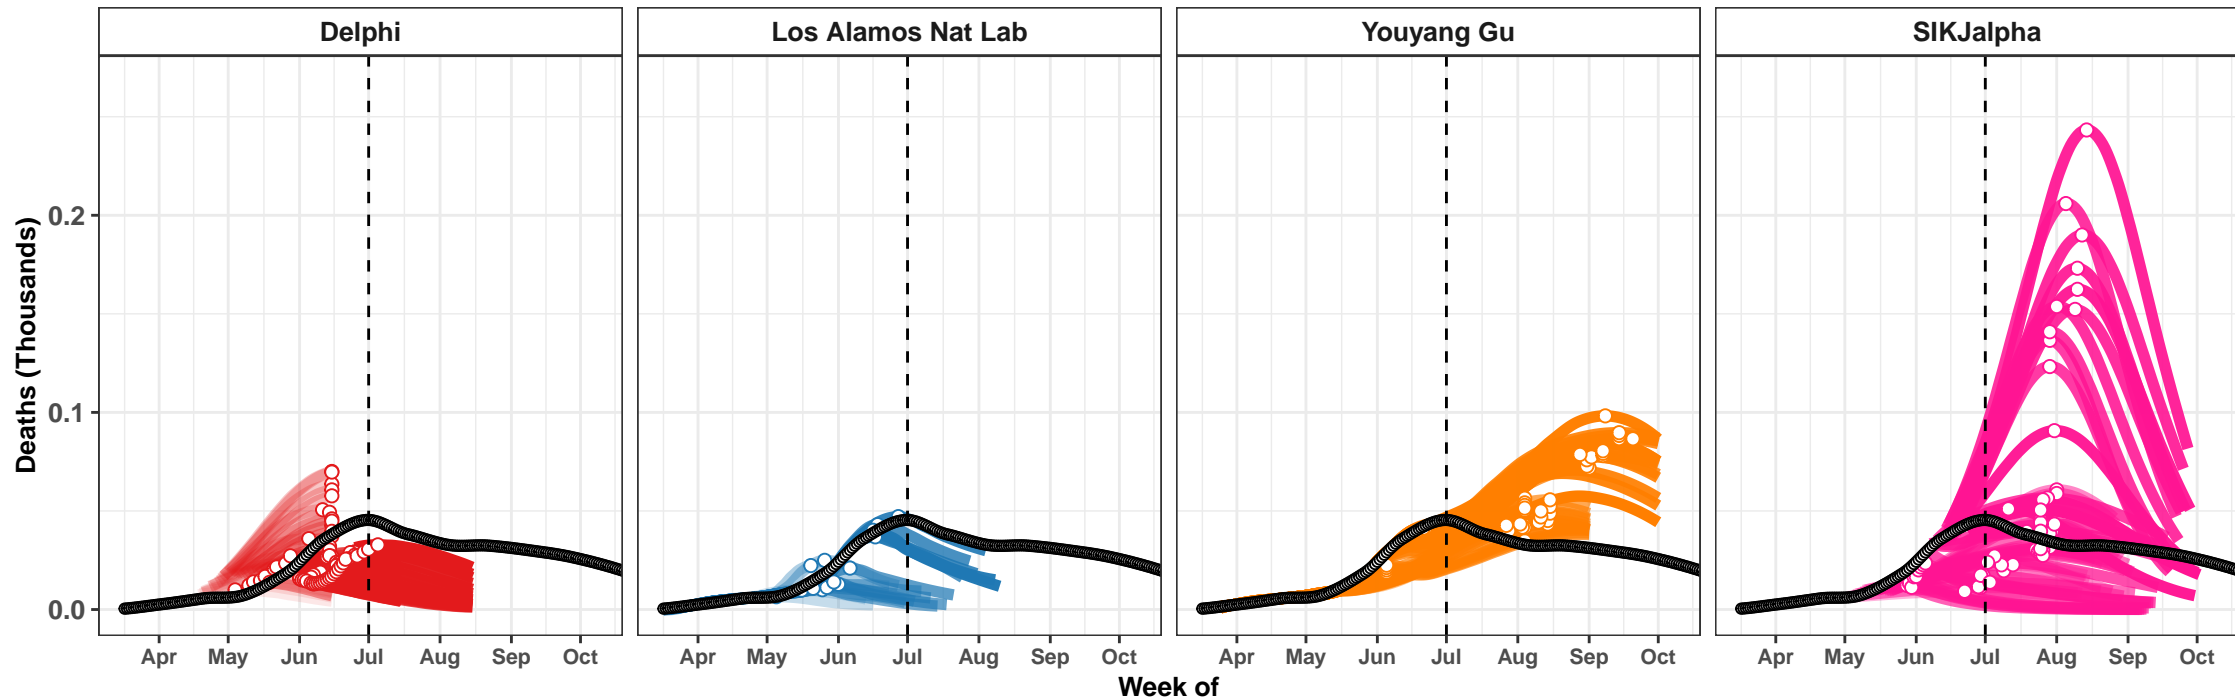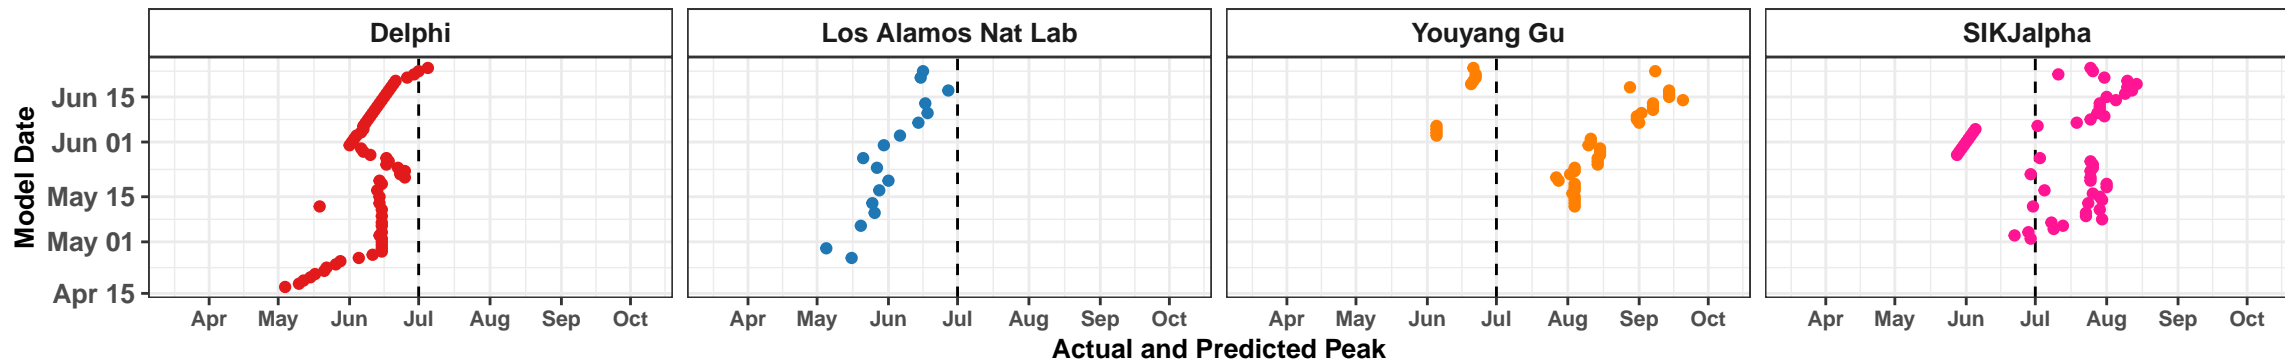

# Ohio – Smoothed Daily Deaths

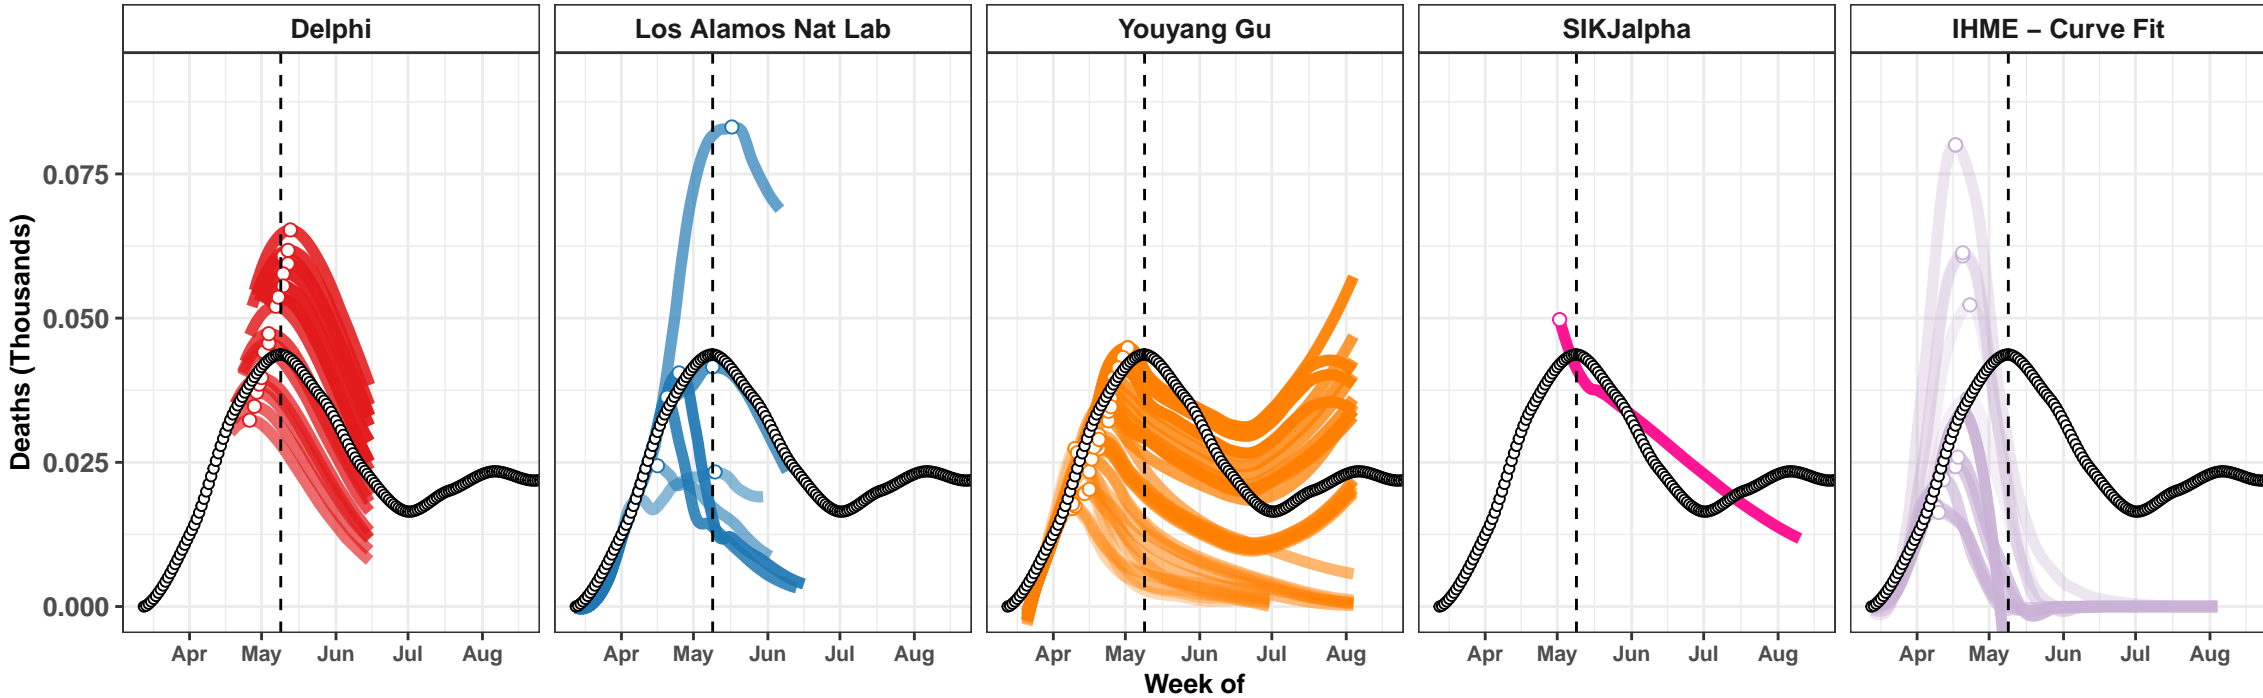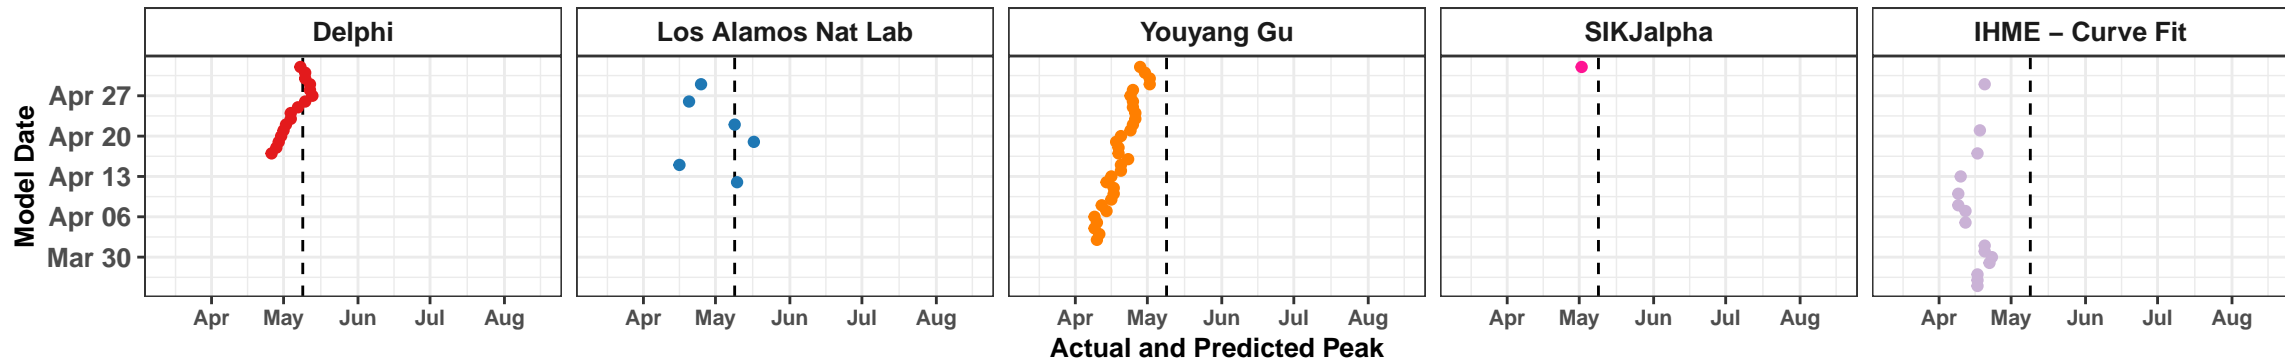

# Connecticut – Smoothed Daily Deaths

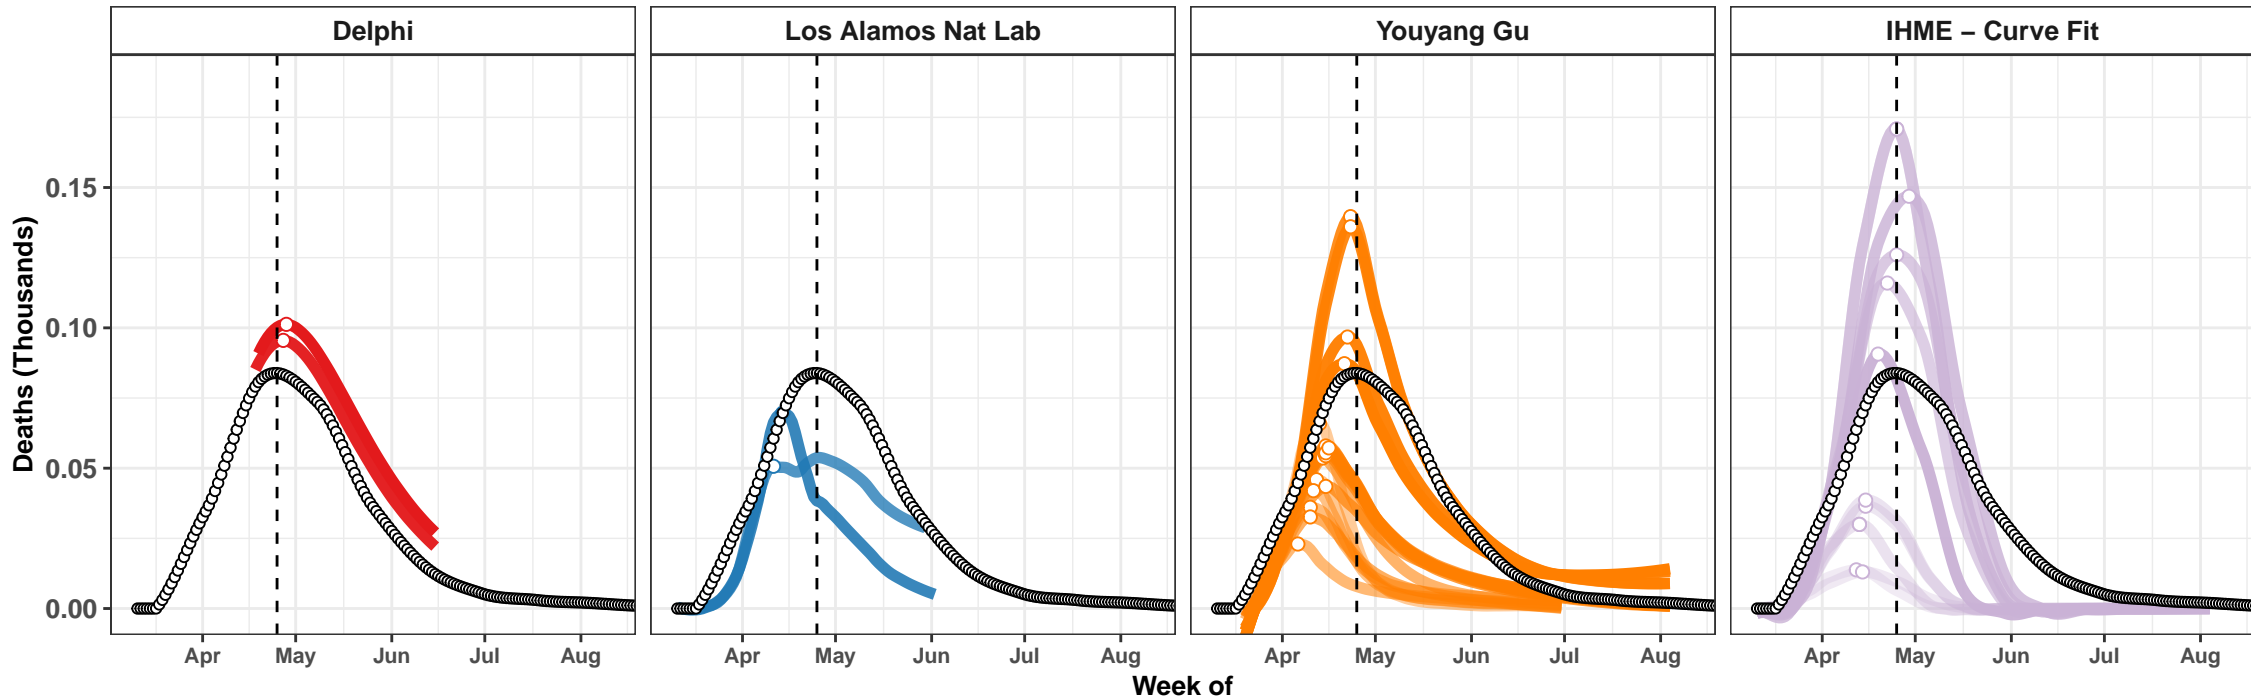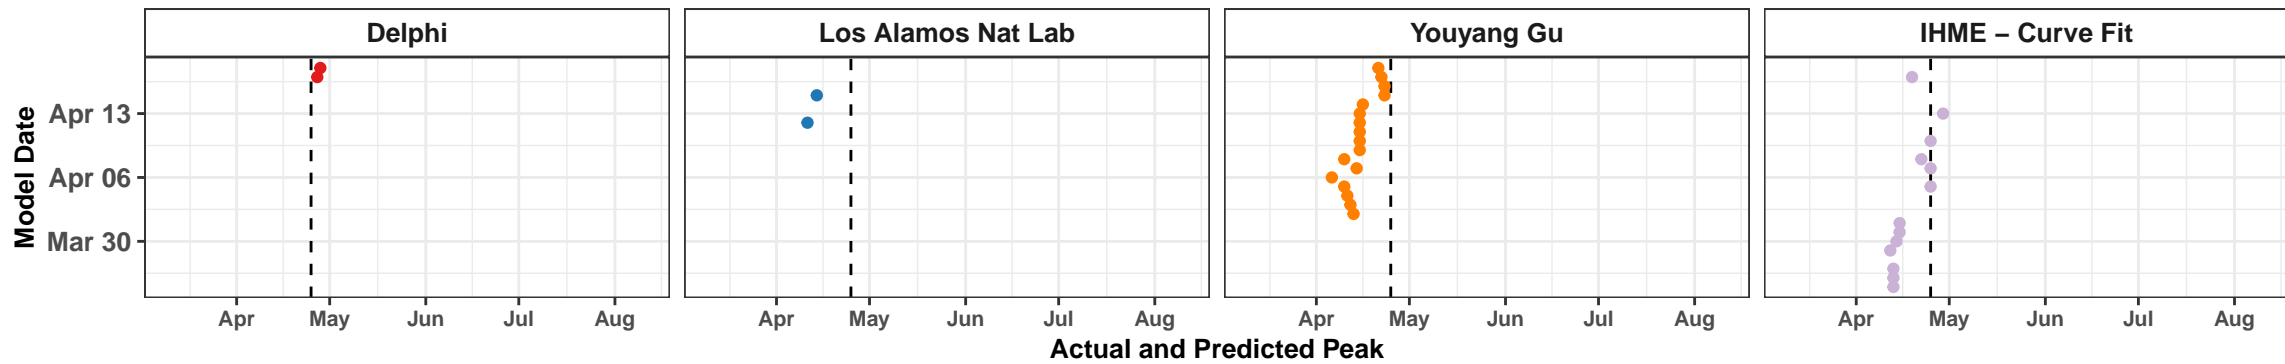

# North Carolina – Smoothed Daily Deaths

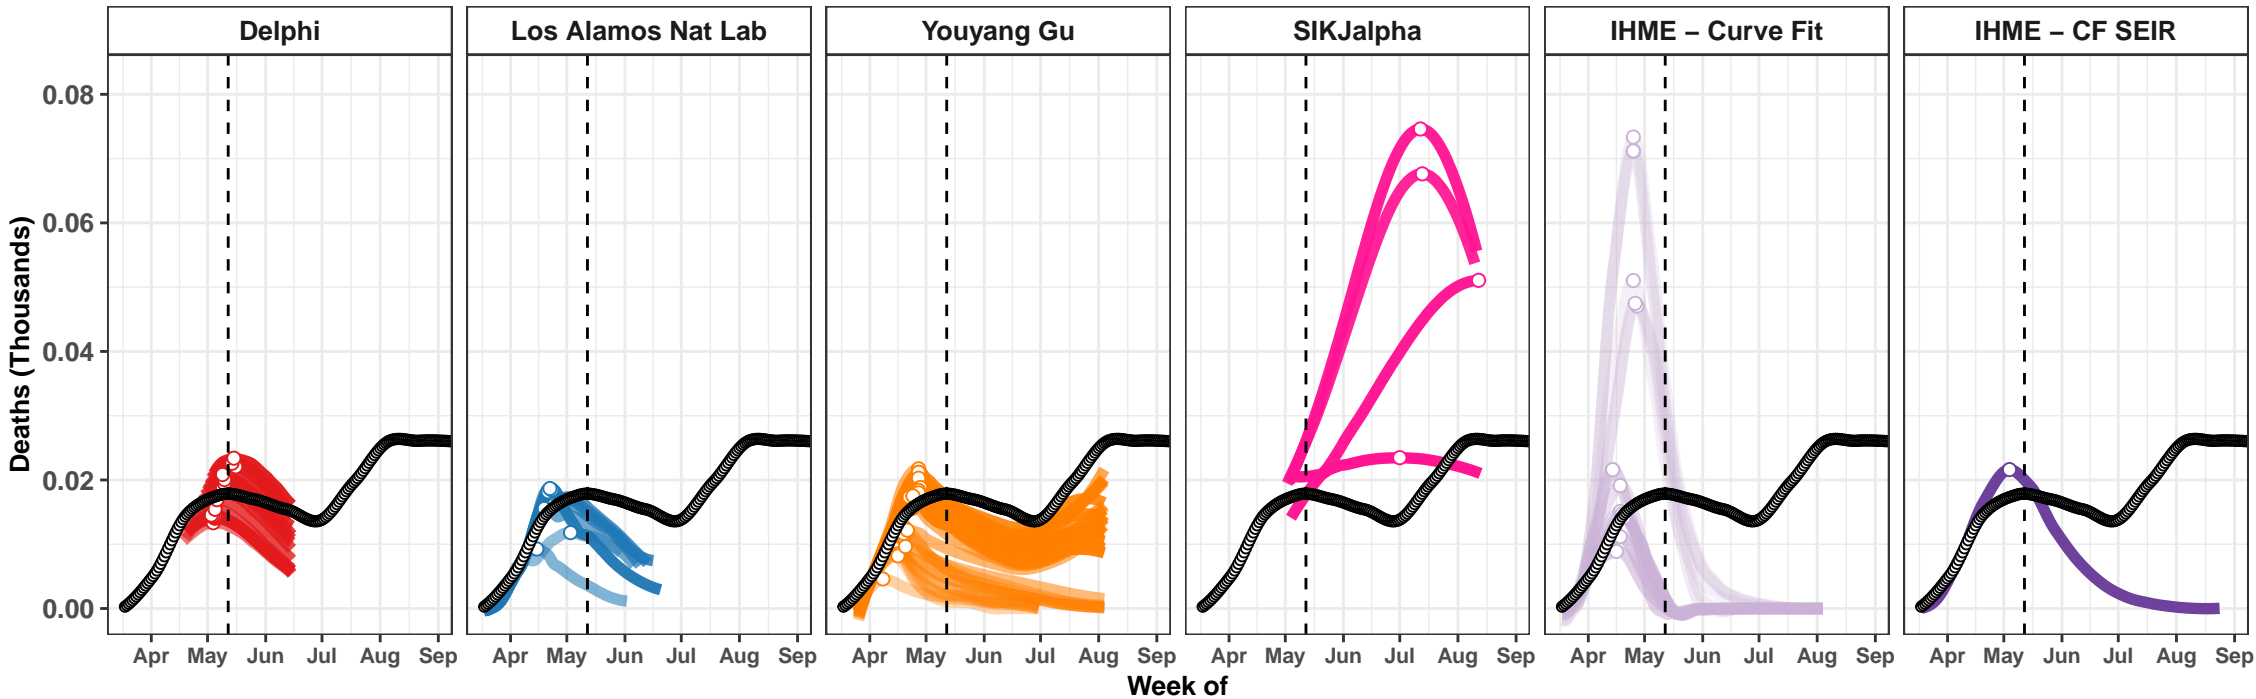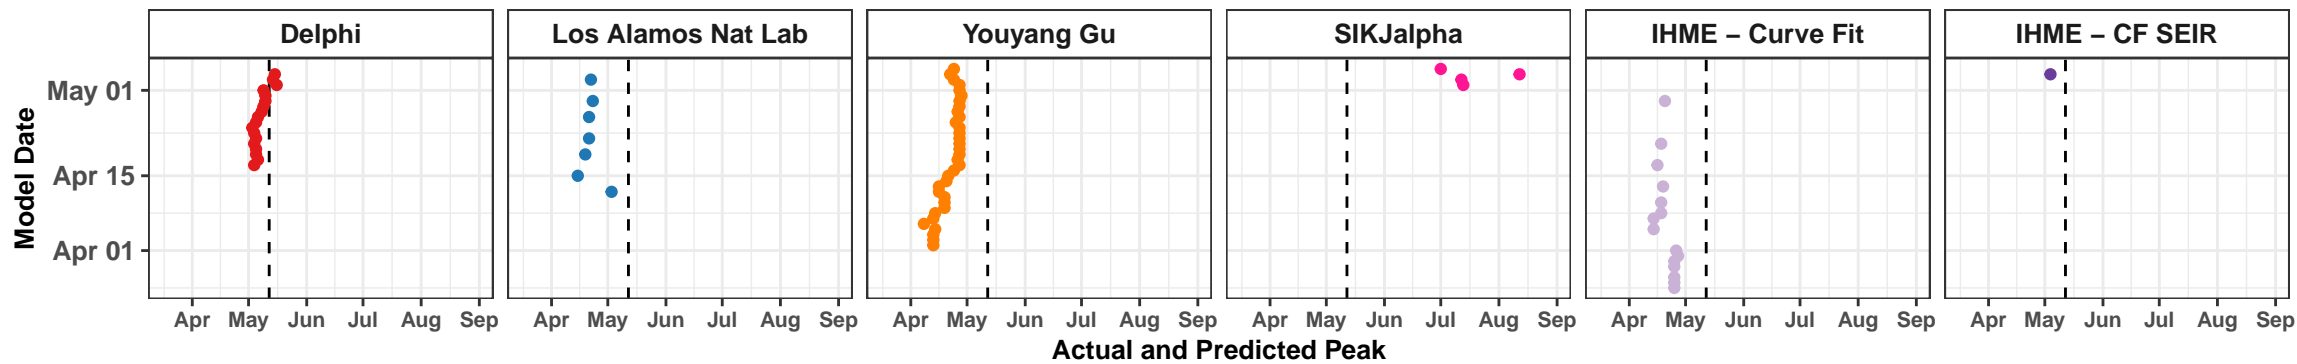

# Indiana – Smoothed Daily Deaths

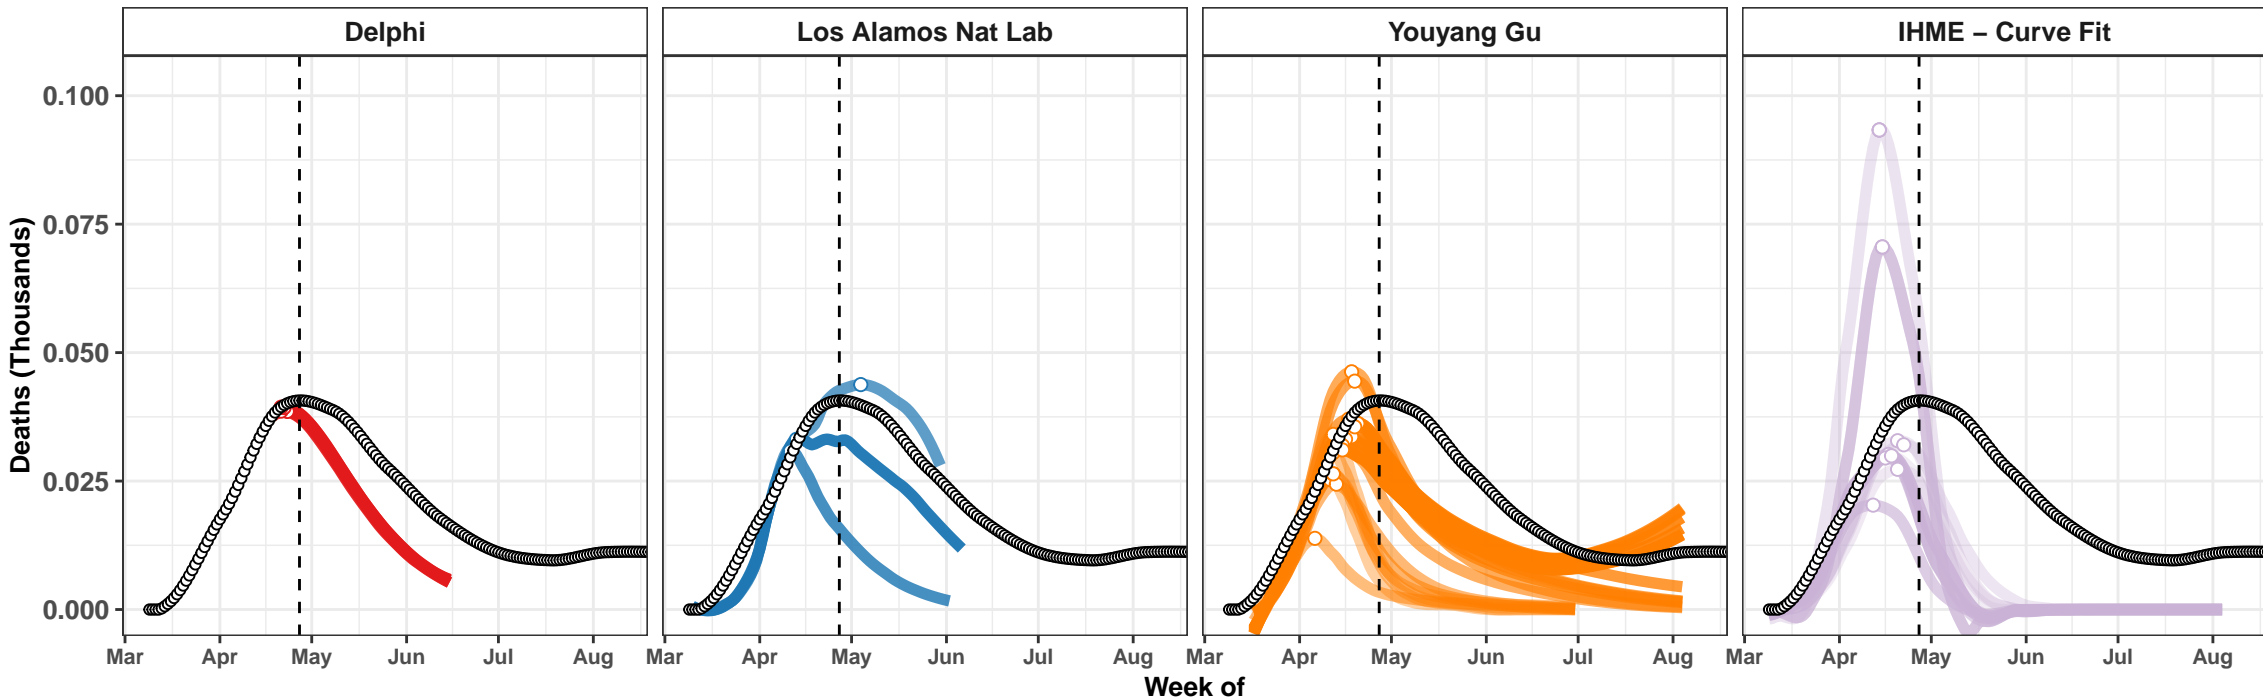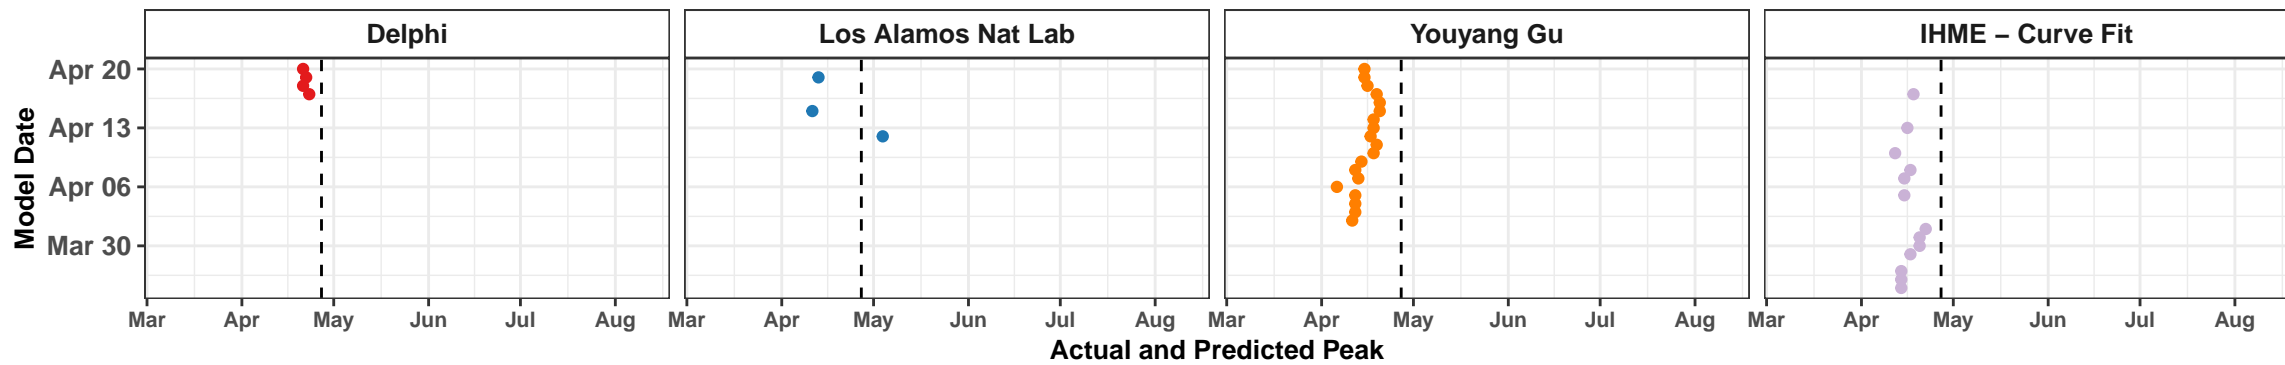

# Maryland – Smoothed Daily Deaths

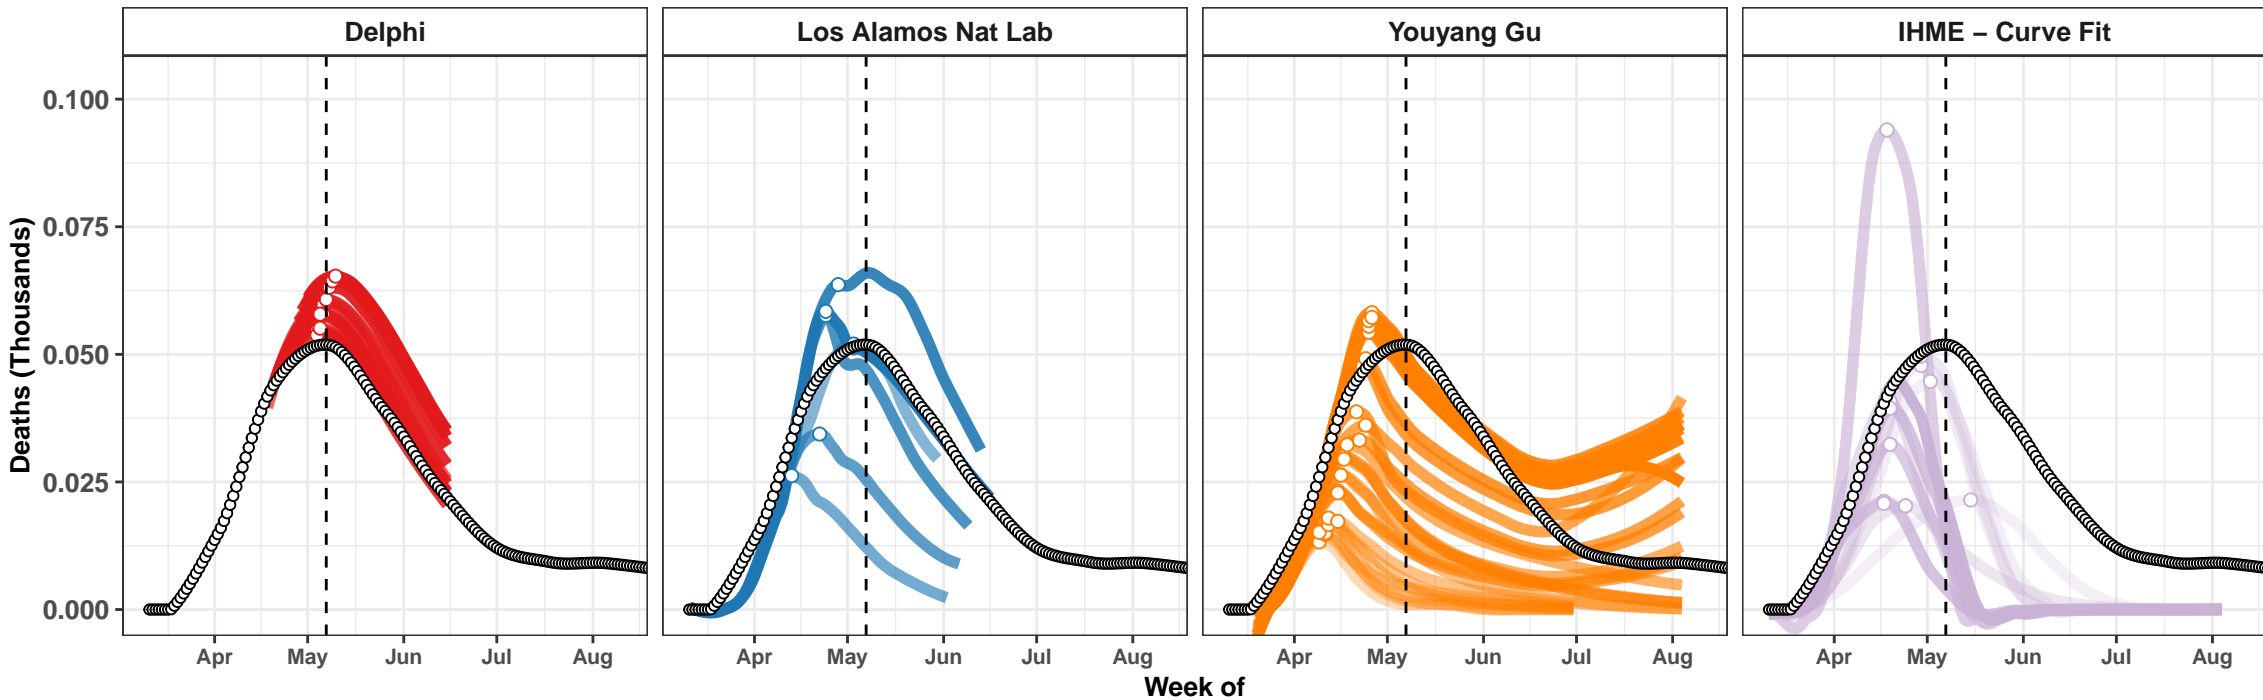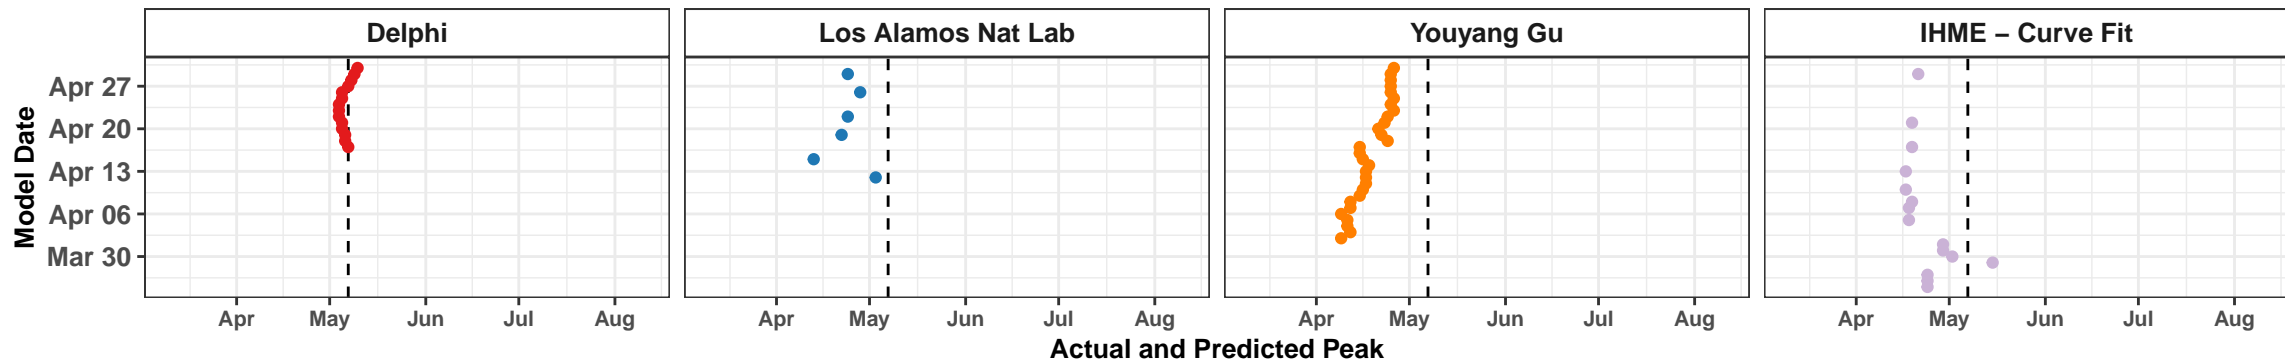

# South Carolina – Smoothed Daily Deaths

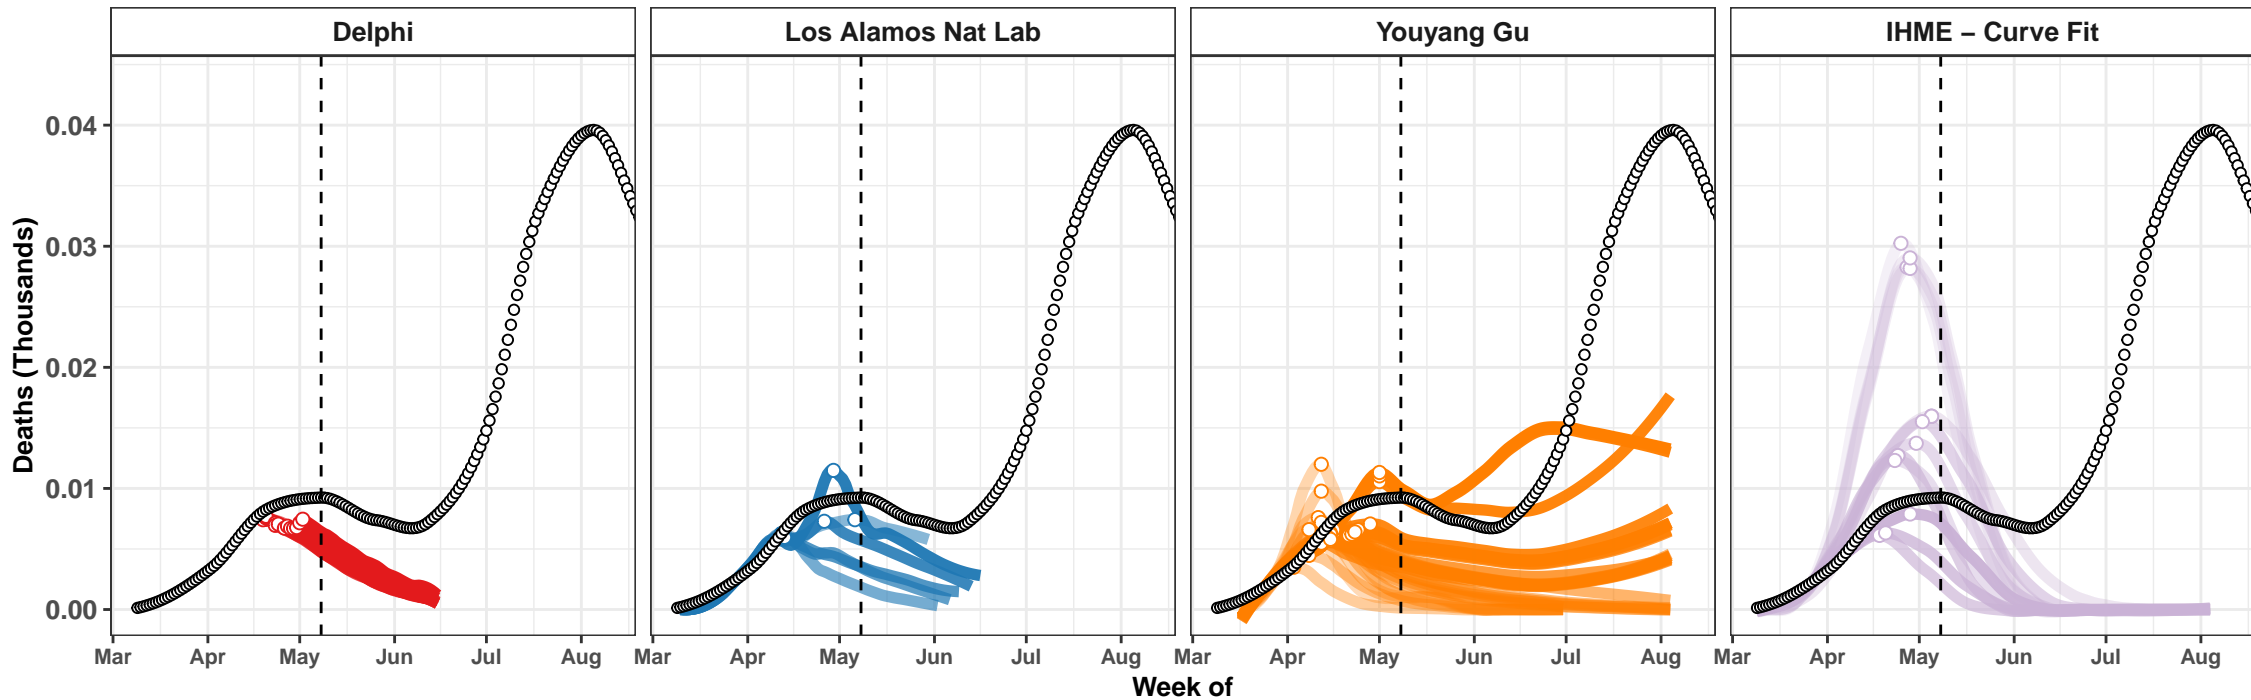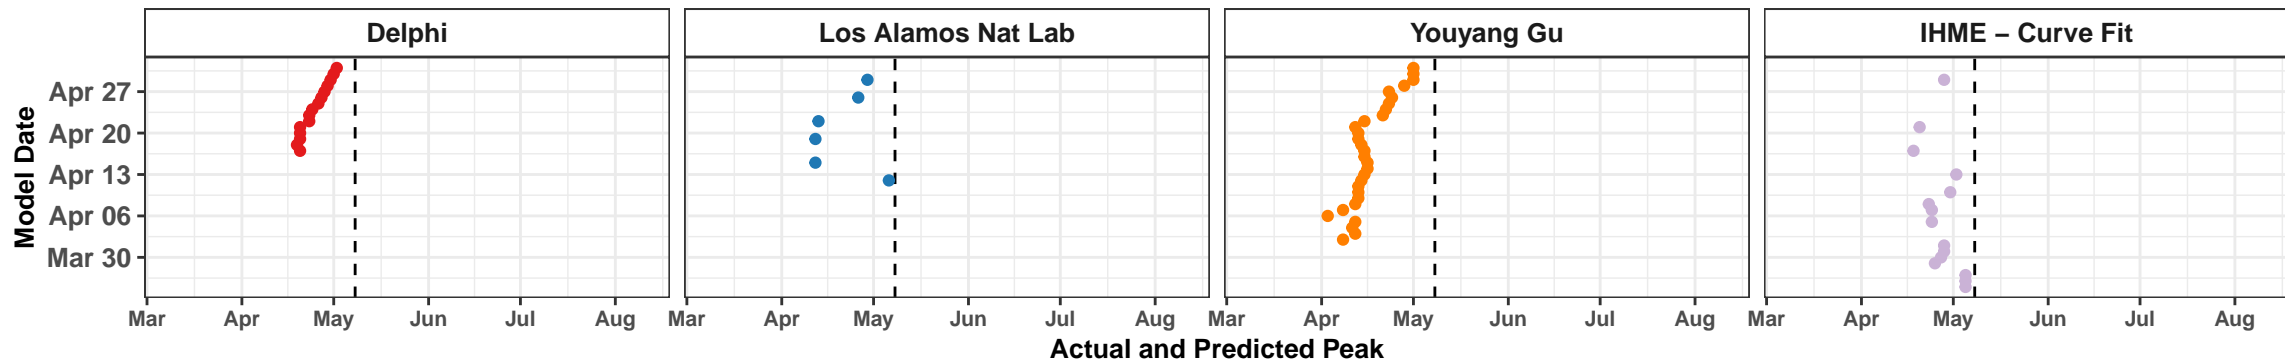



# Morocco – Smoothed Daily Deaths

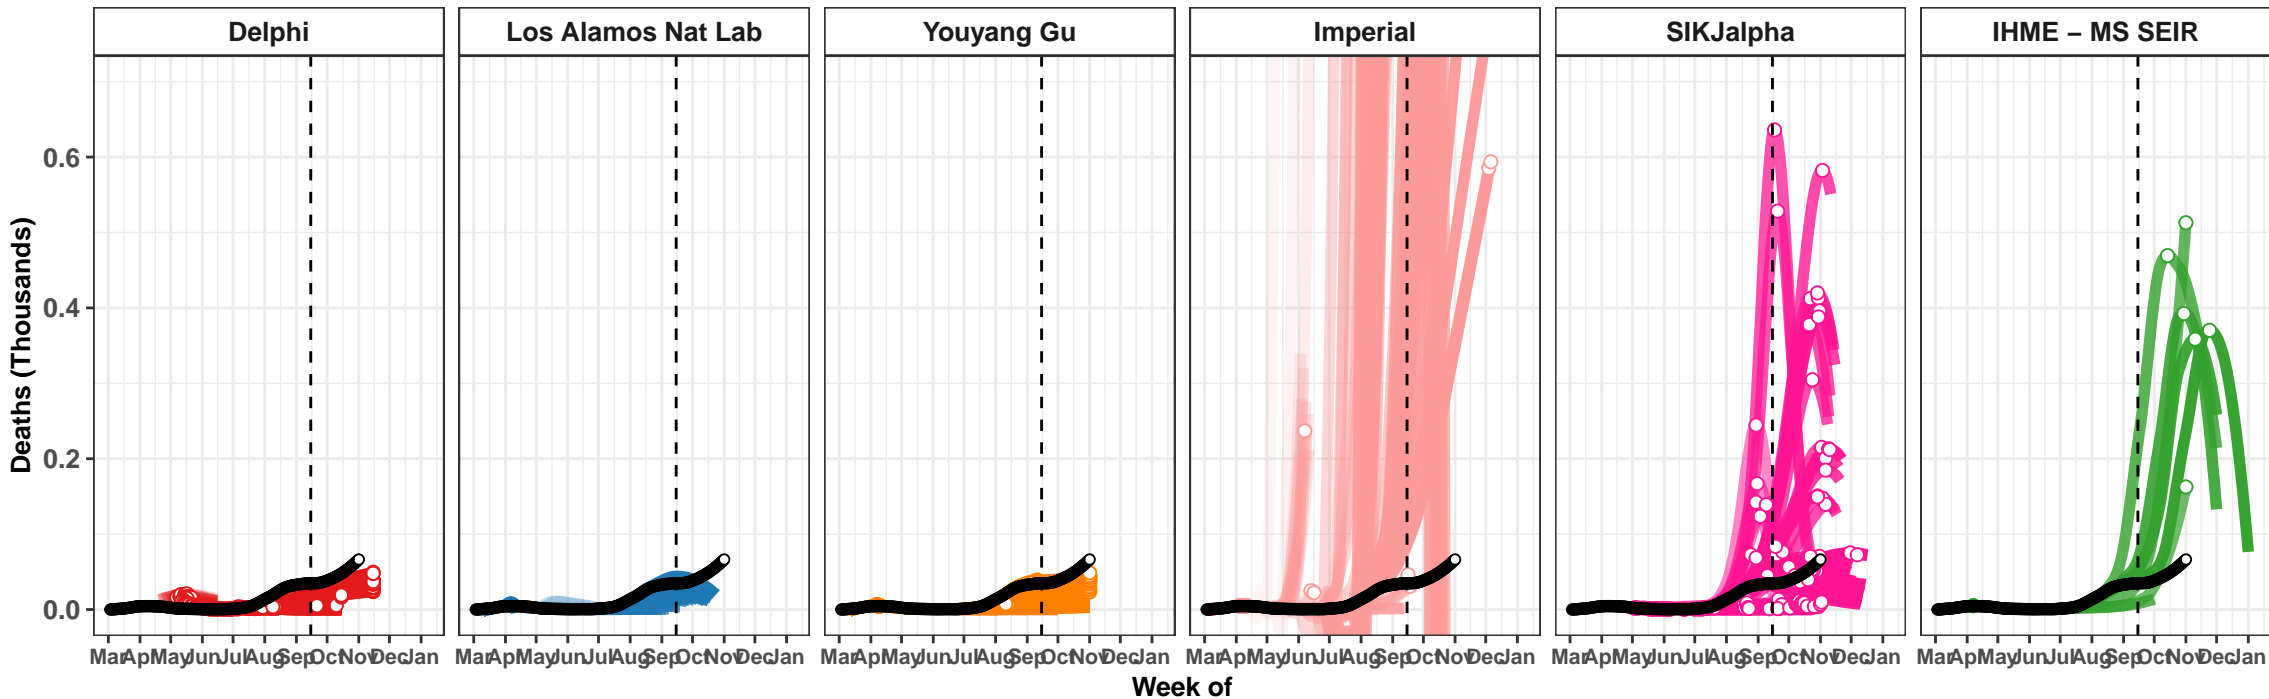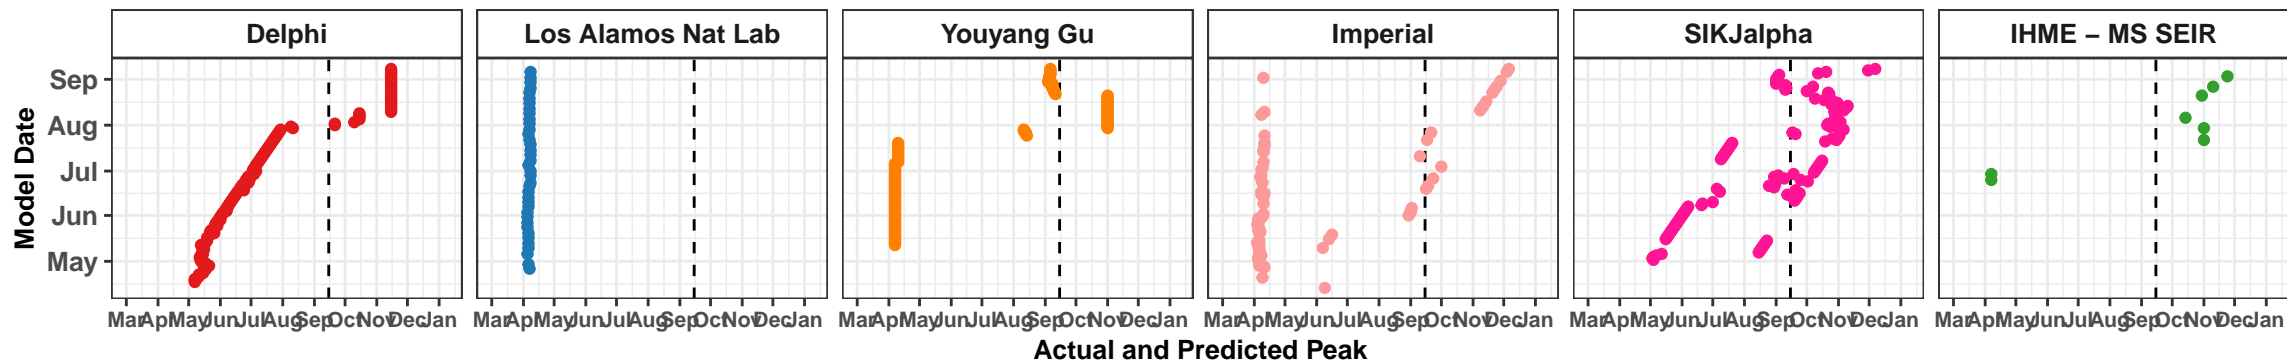

# Guatemala – Smoothed Daily Deaths

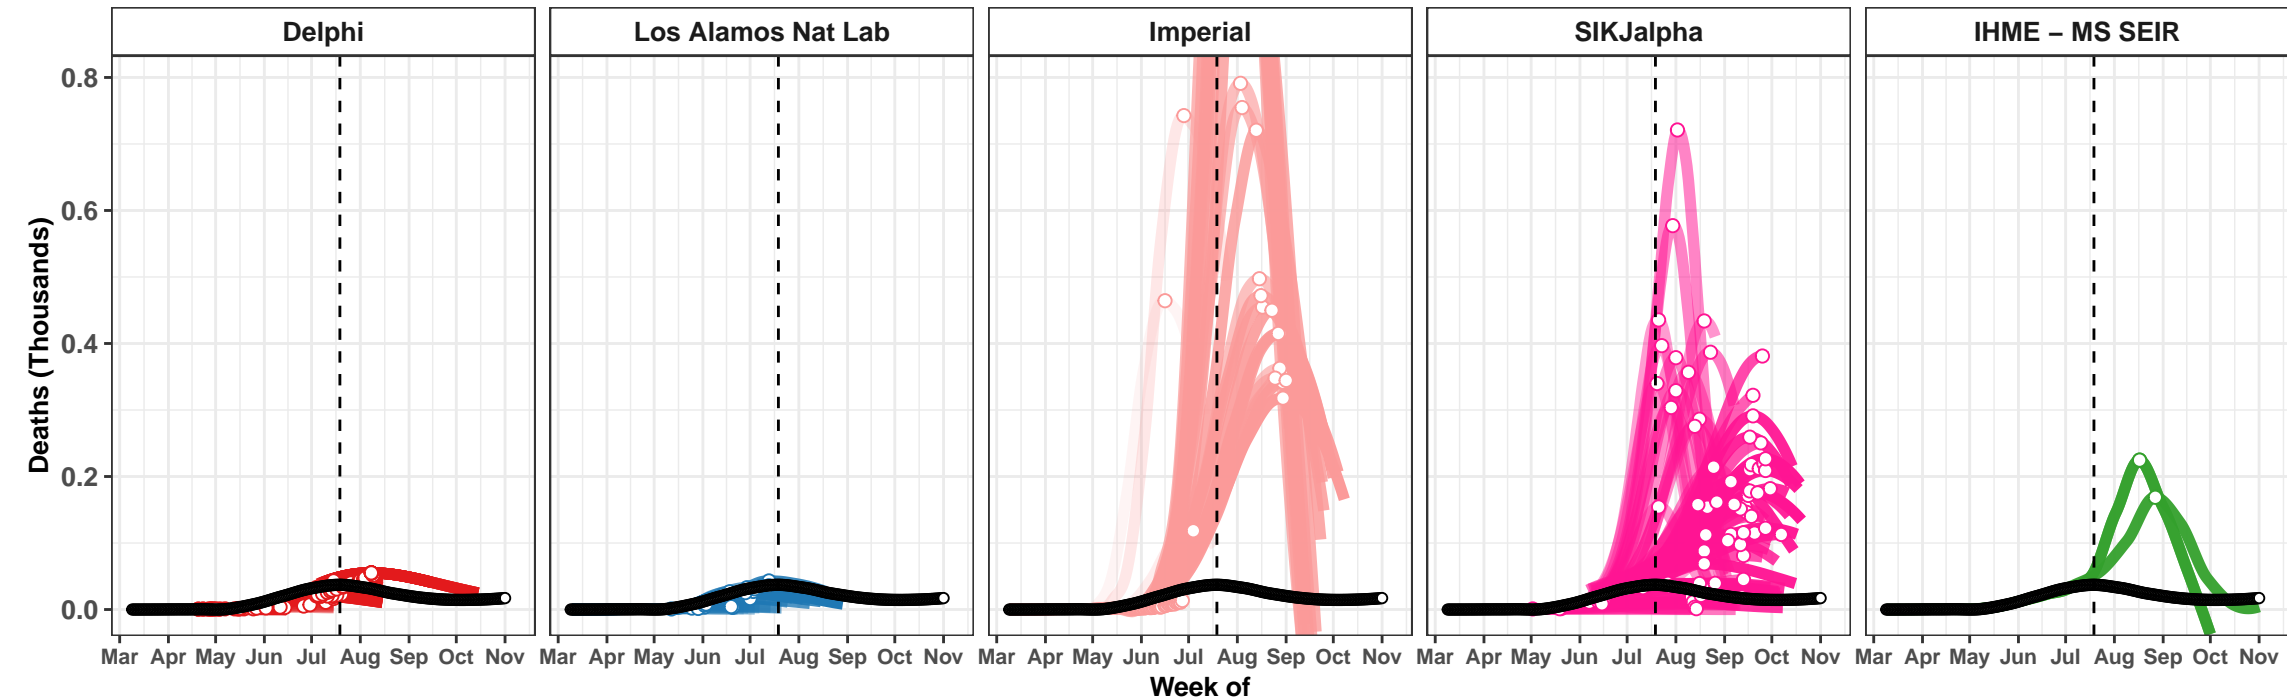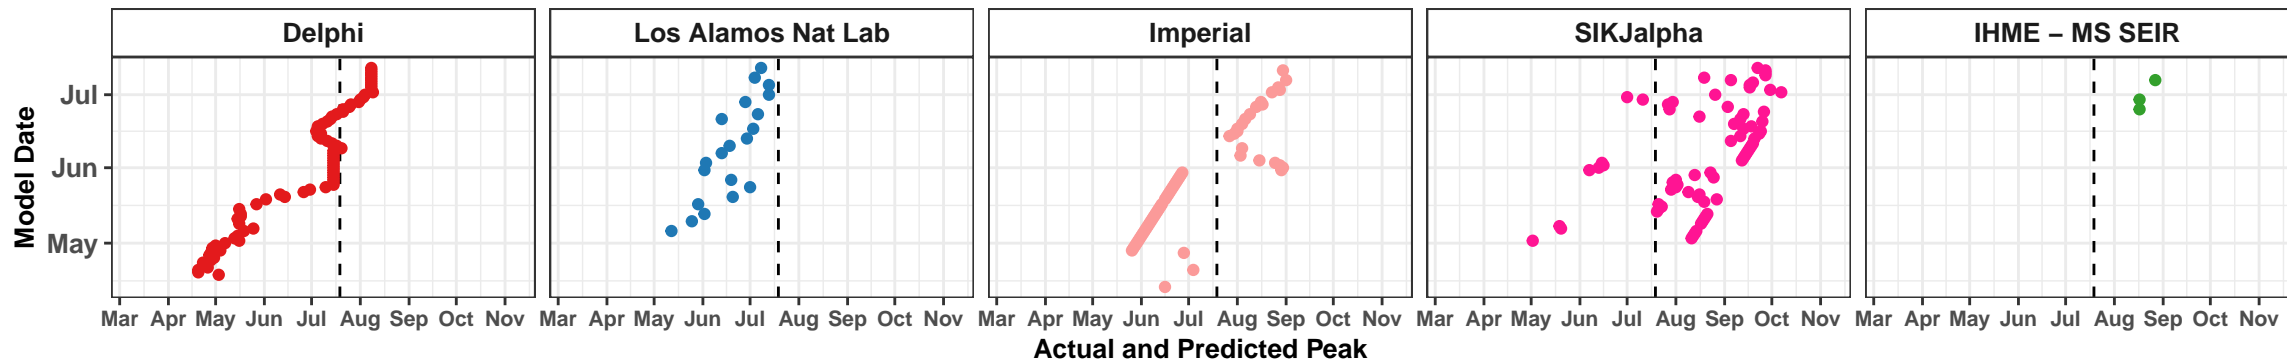

# Virginia – Smoothed Daily Deaths

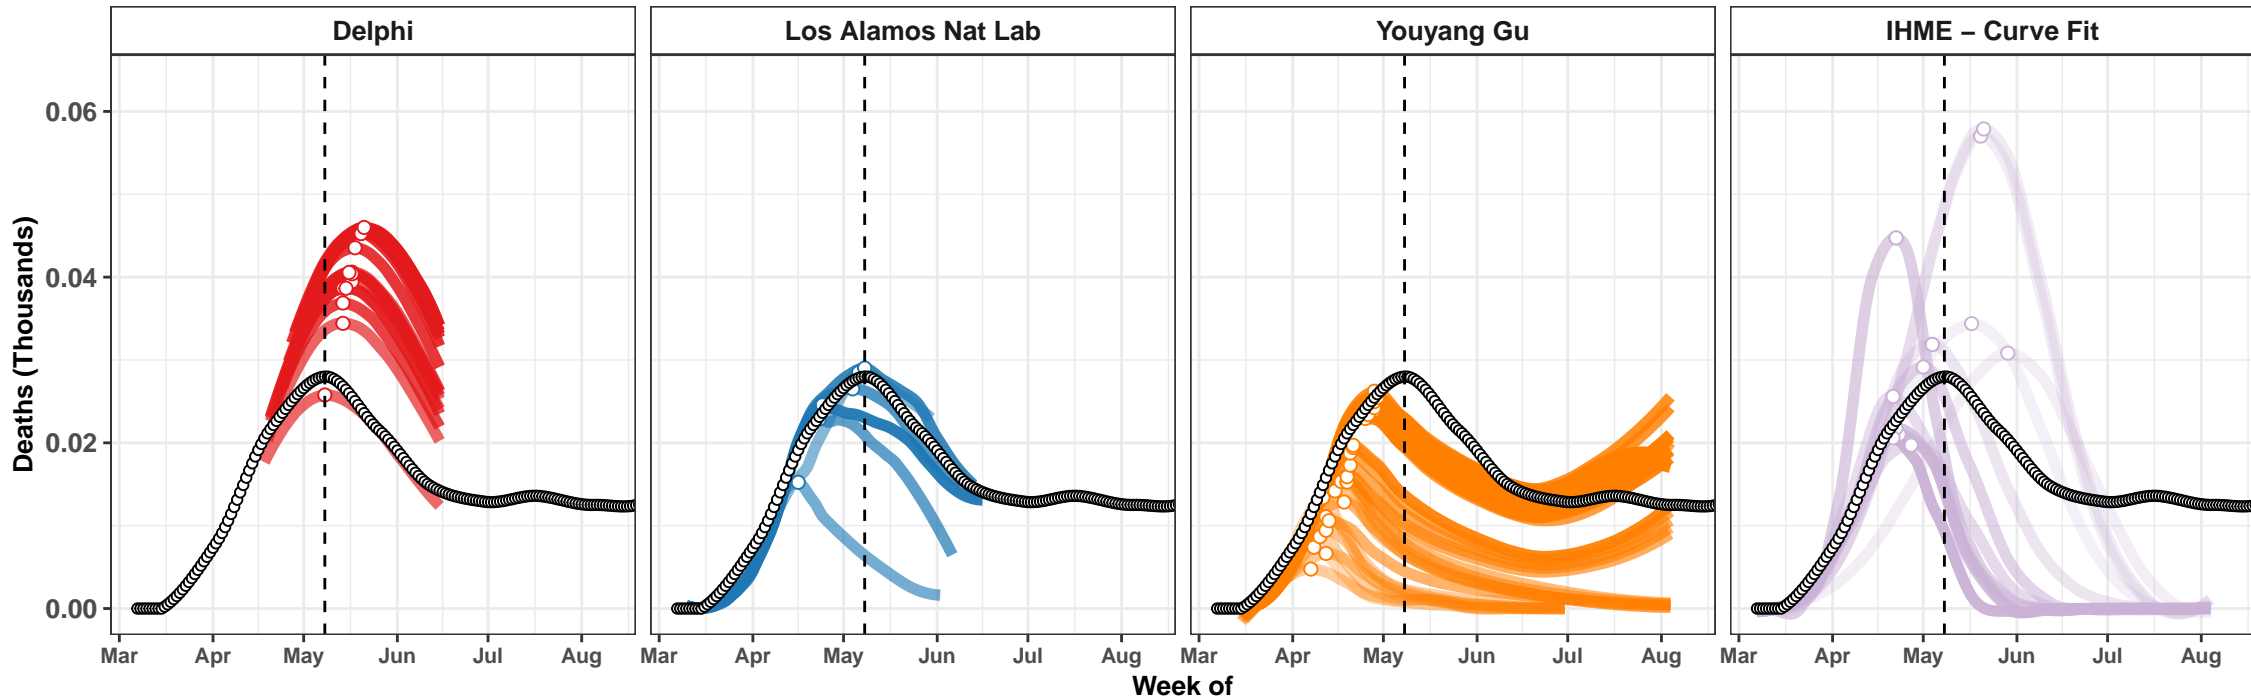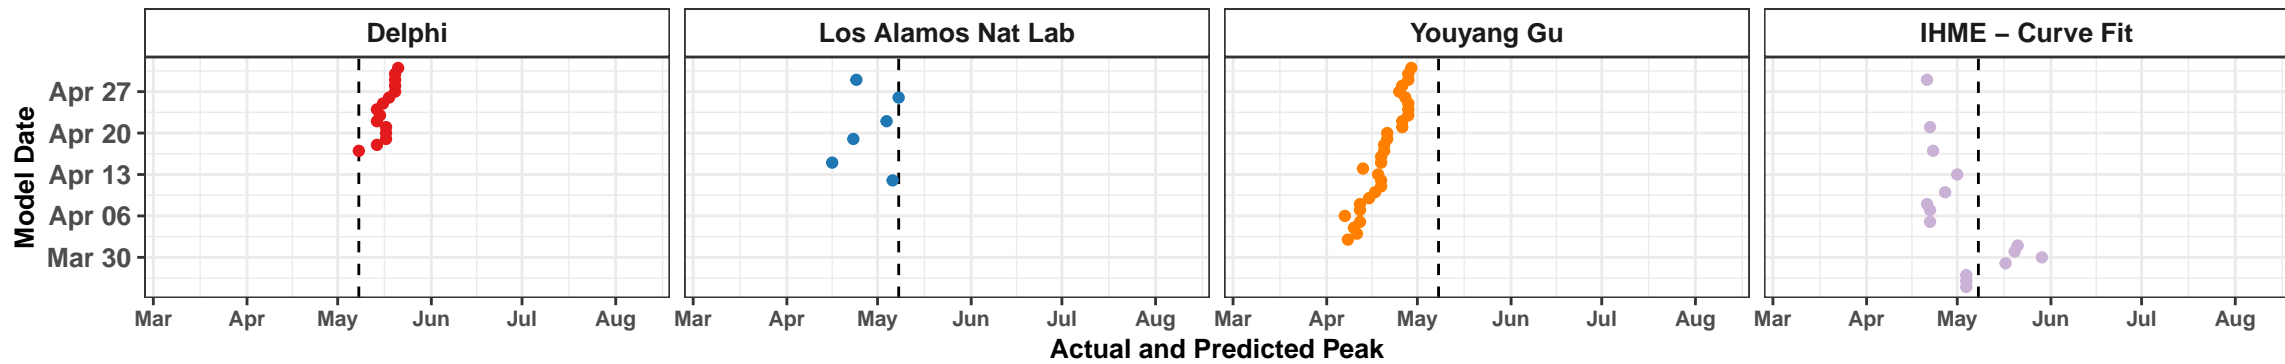

# Czech Republic – Smoothed Daily Deaths

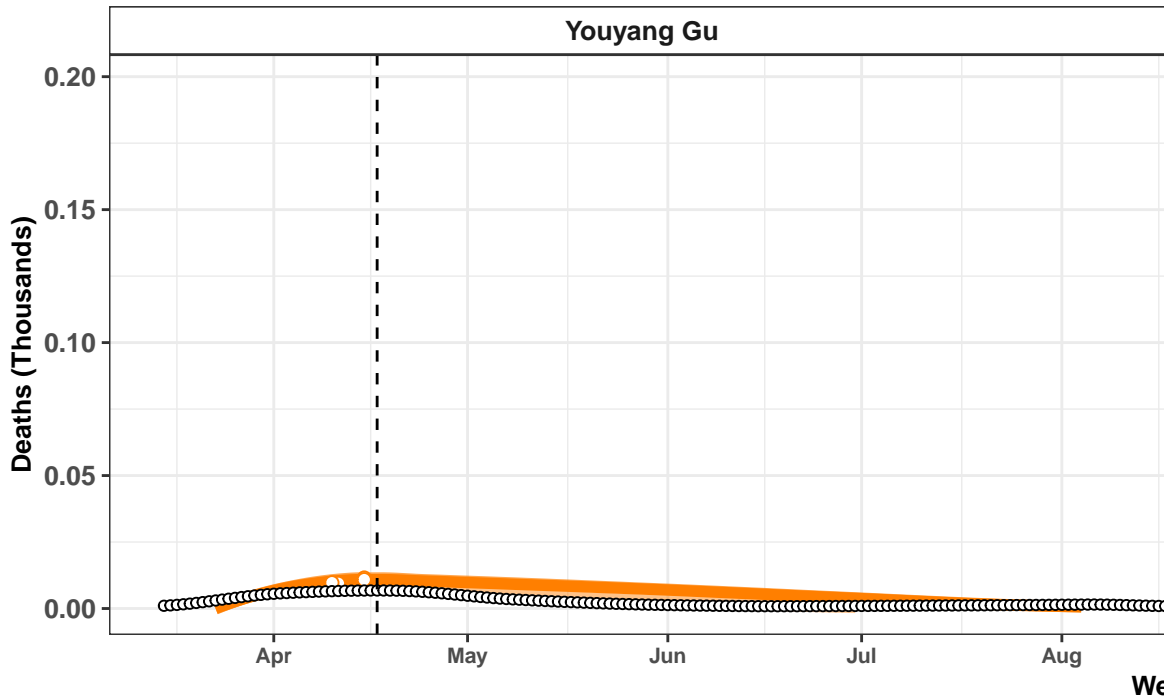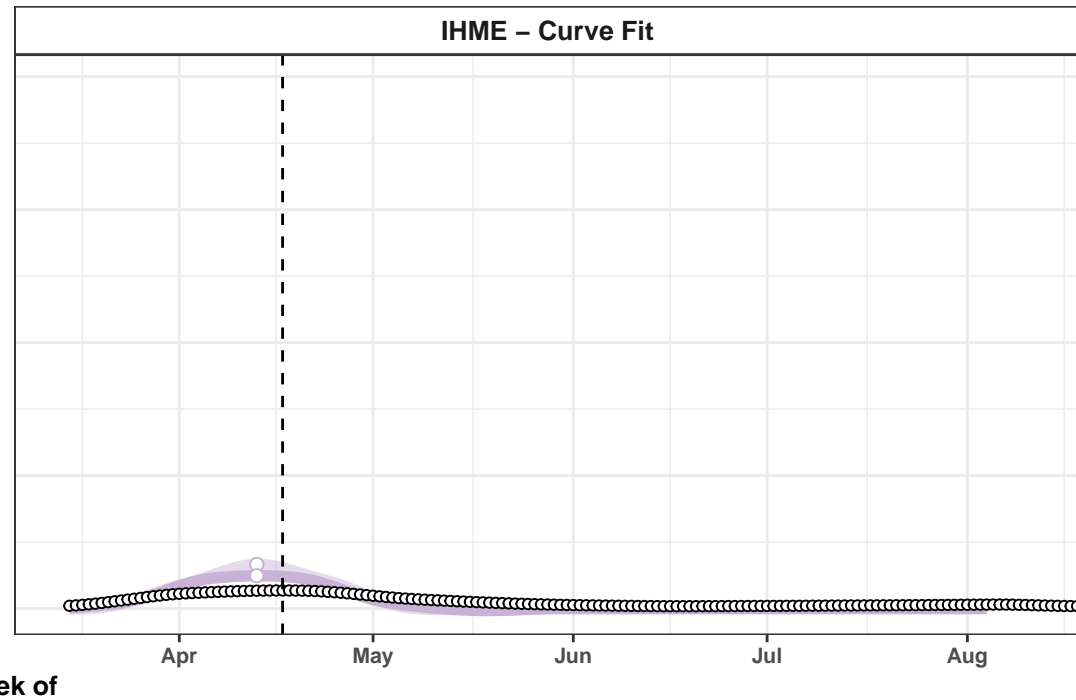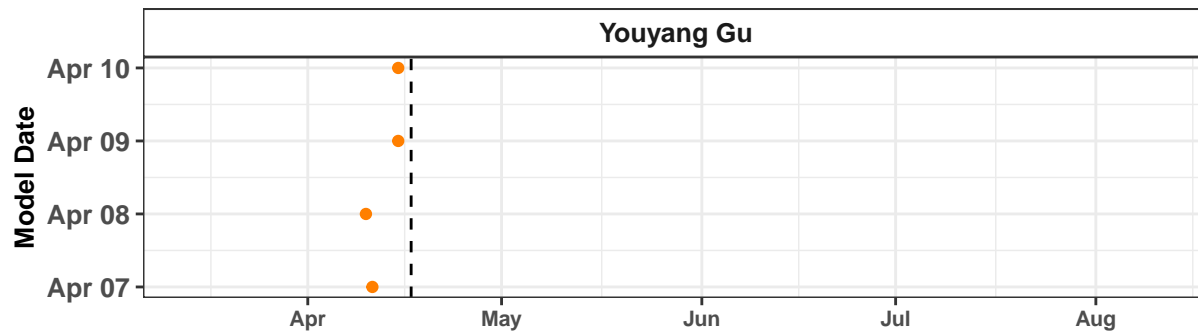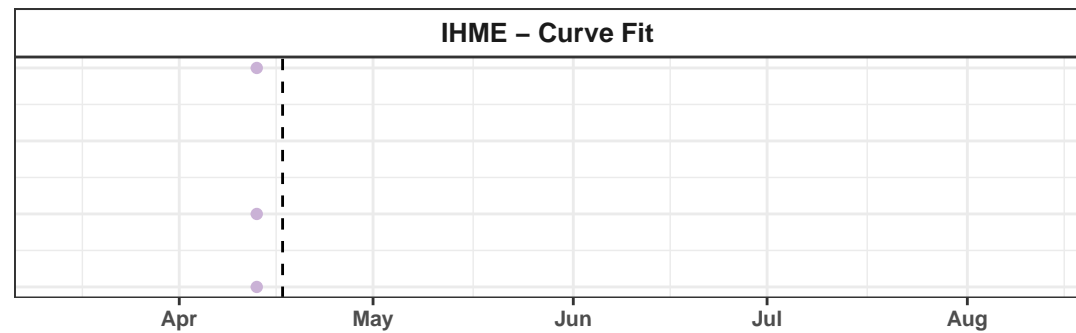

# Mississippi – Smoothed Daily Deaths

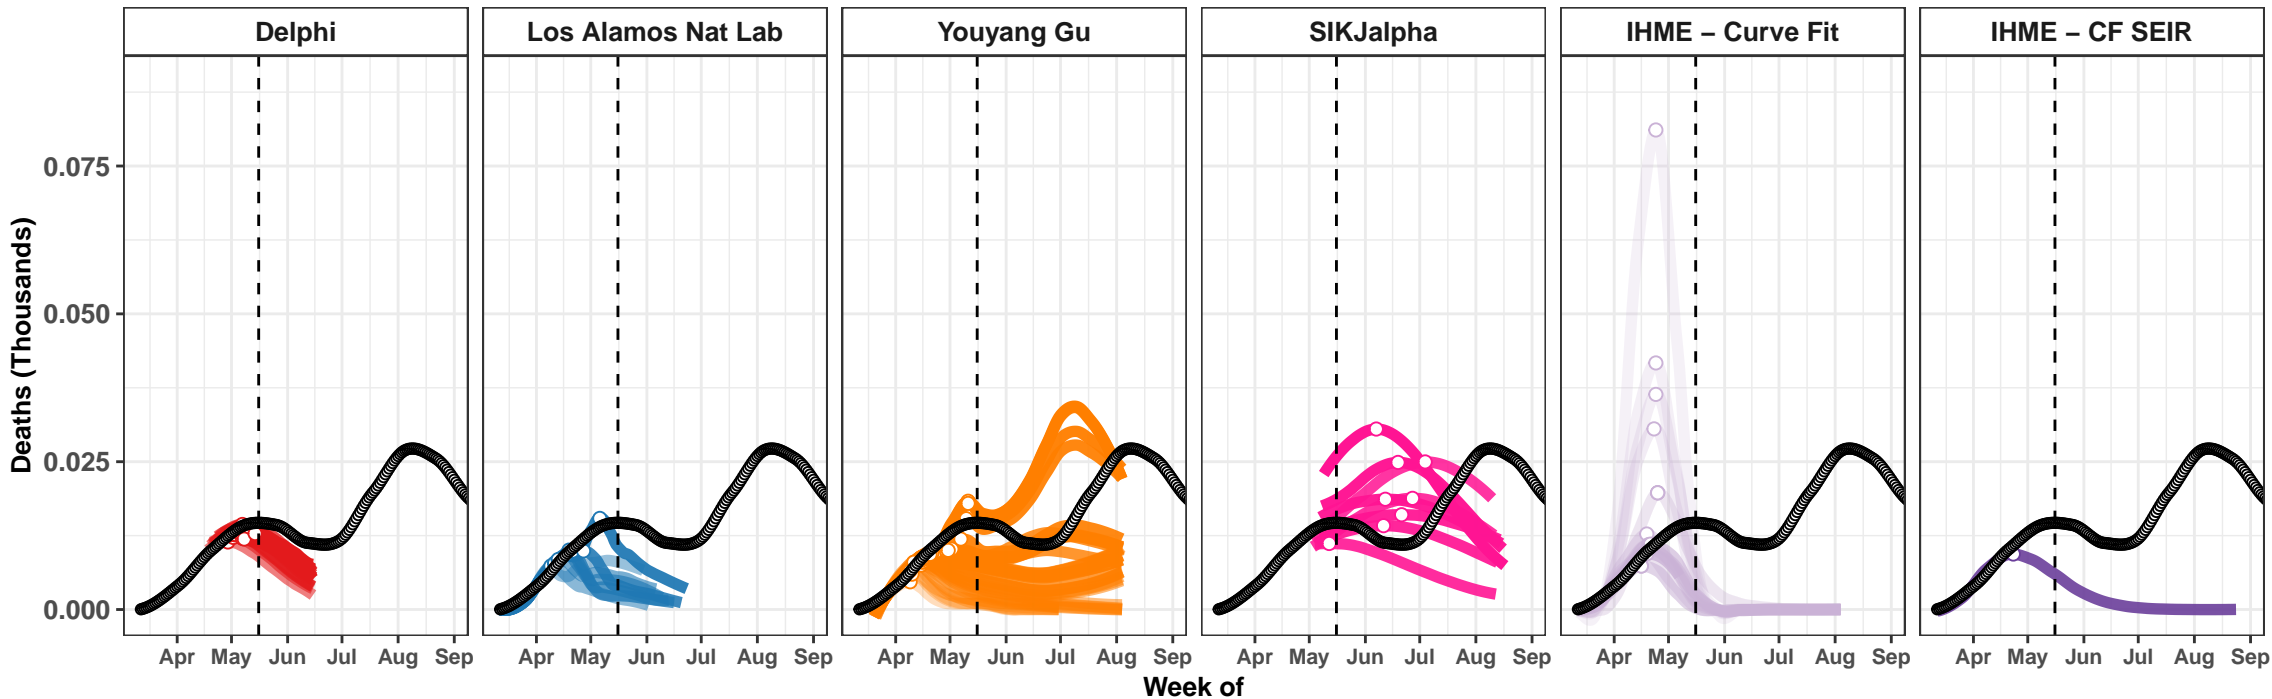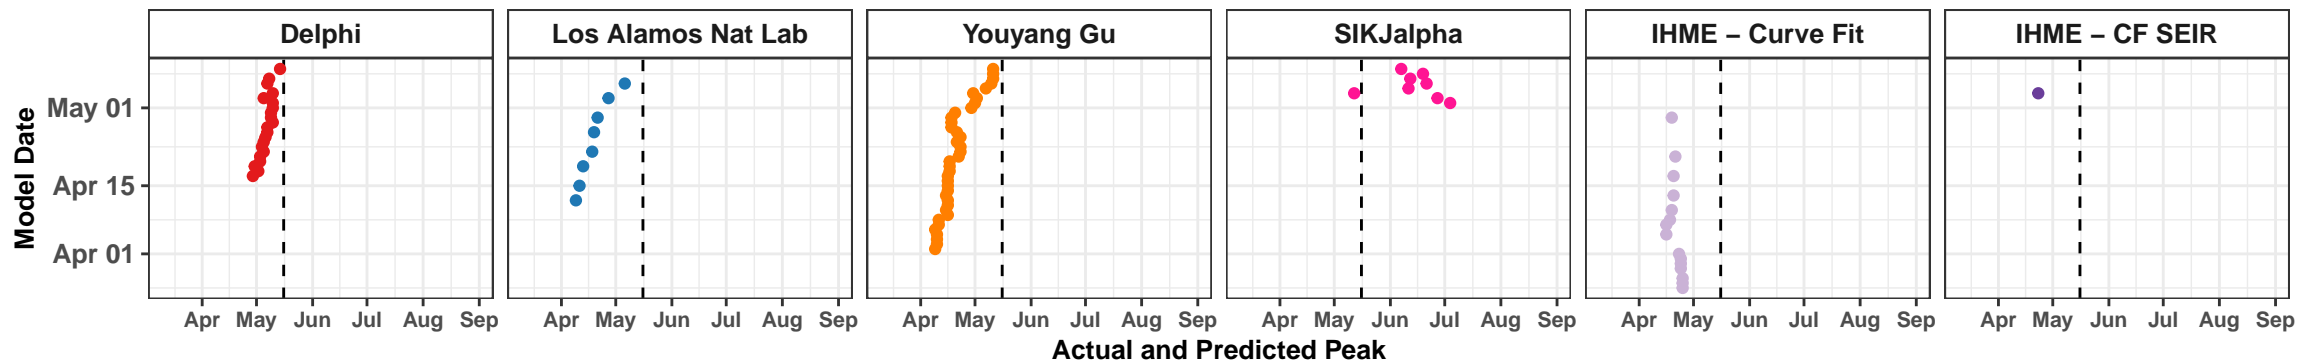

# Tennessee – Smoothed Daily Deaths

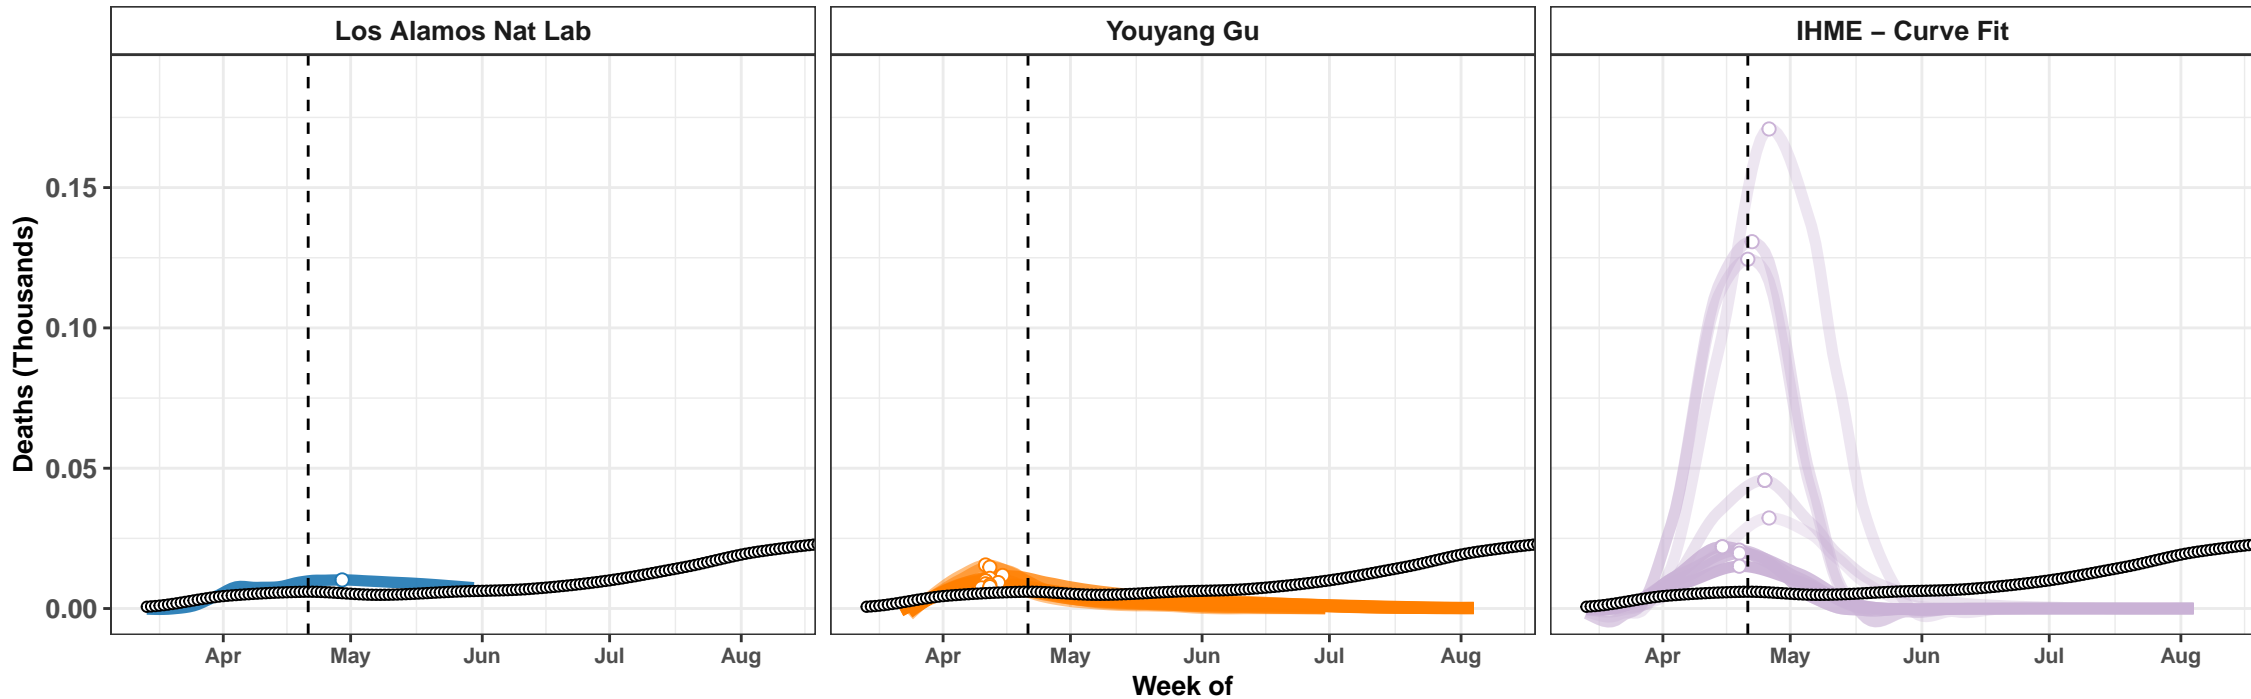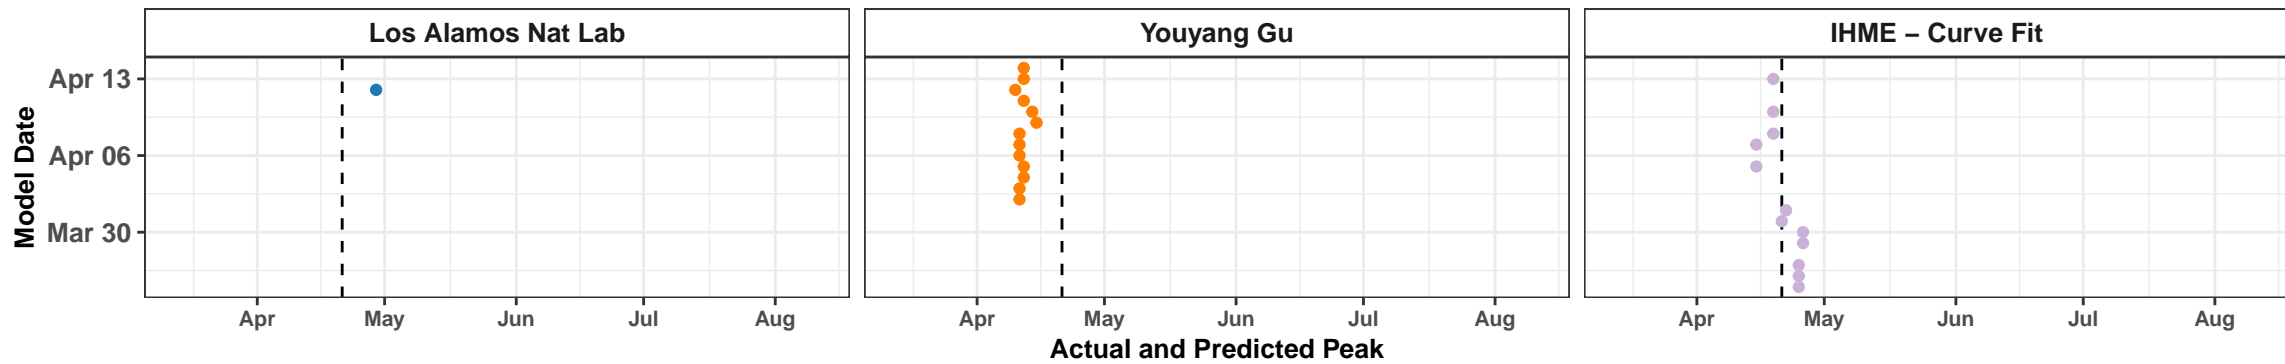

# Missouri – Smoothed Daily Deaths

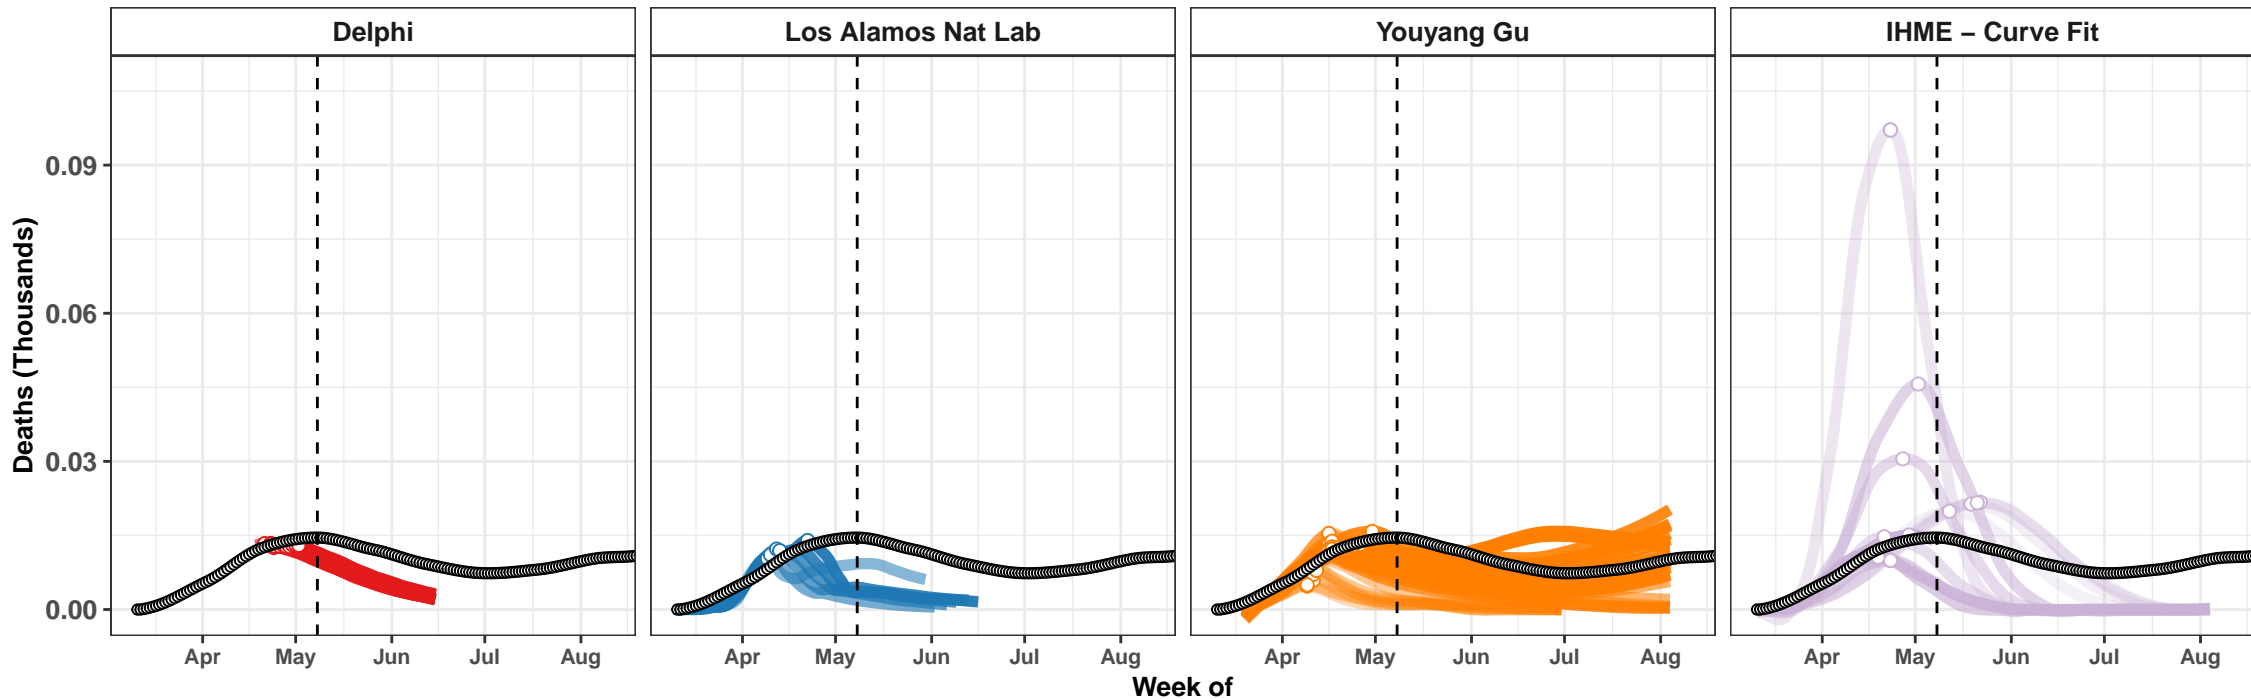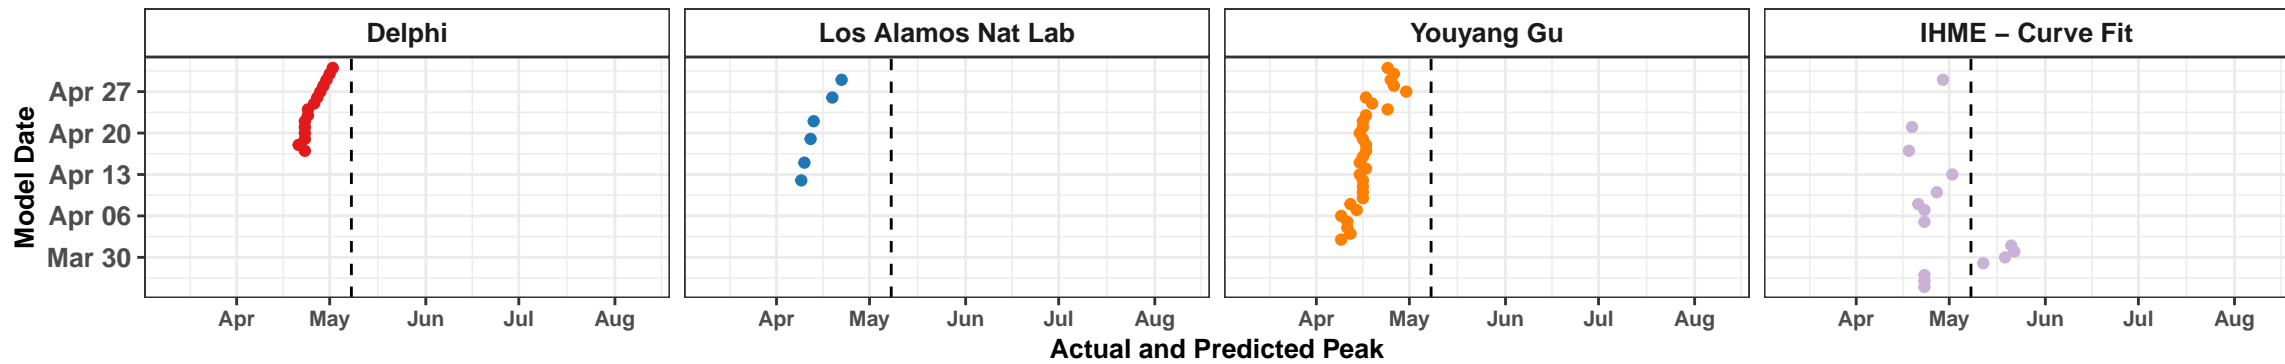

# Alabama – Smoothed Daily Deaths

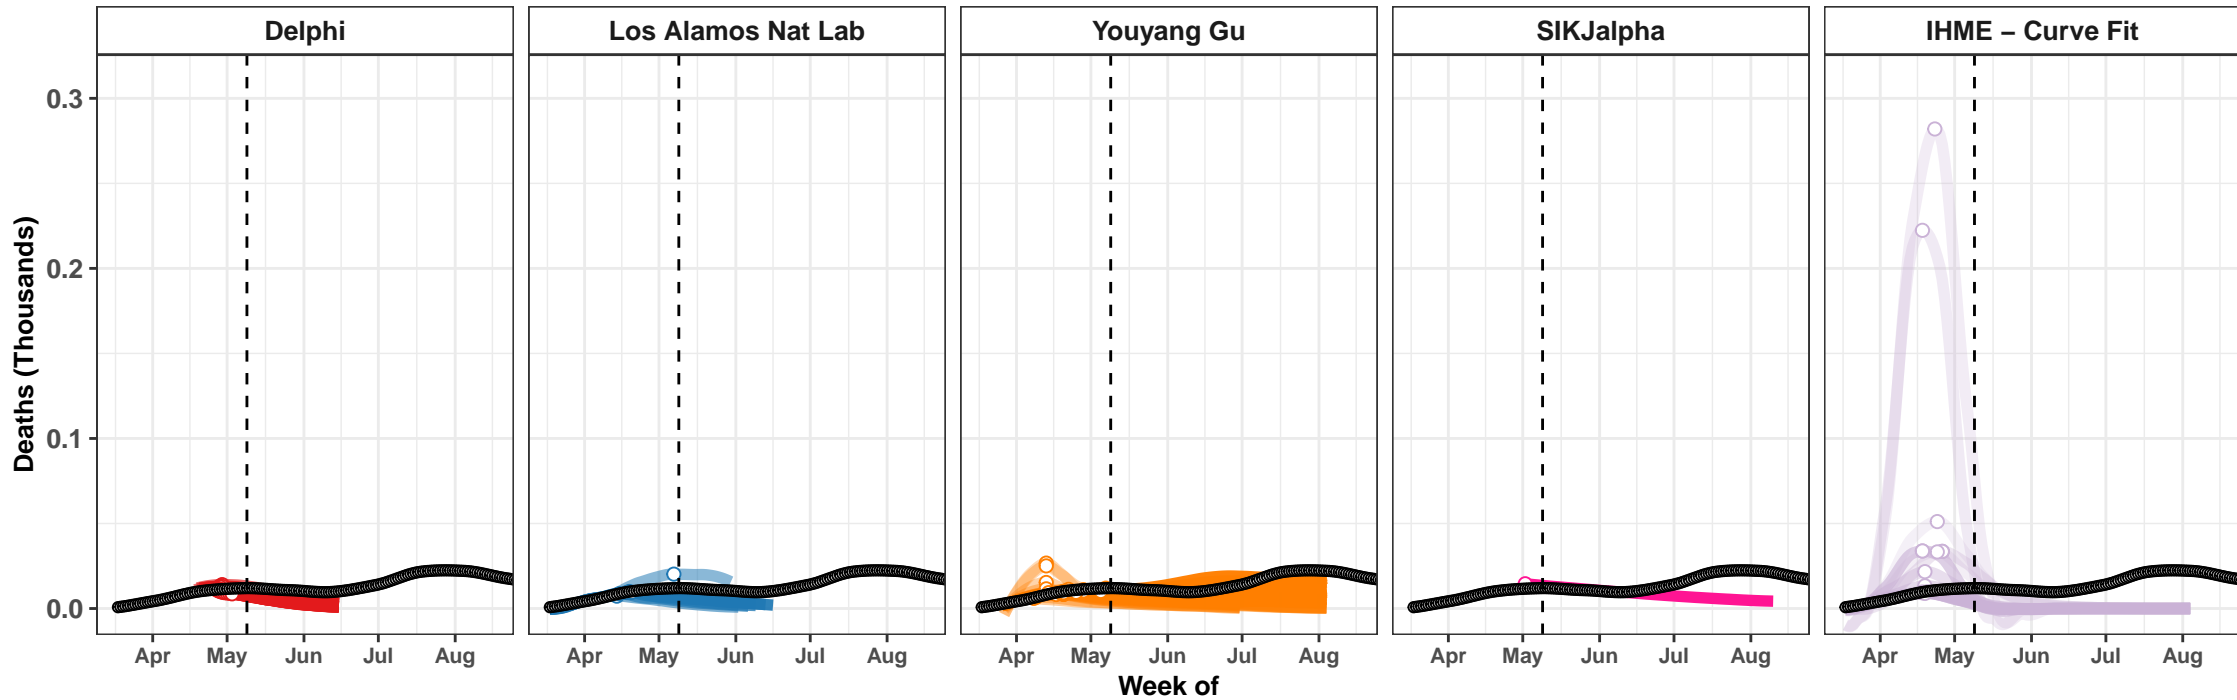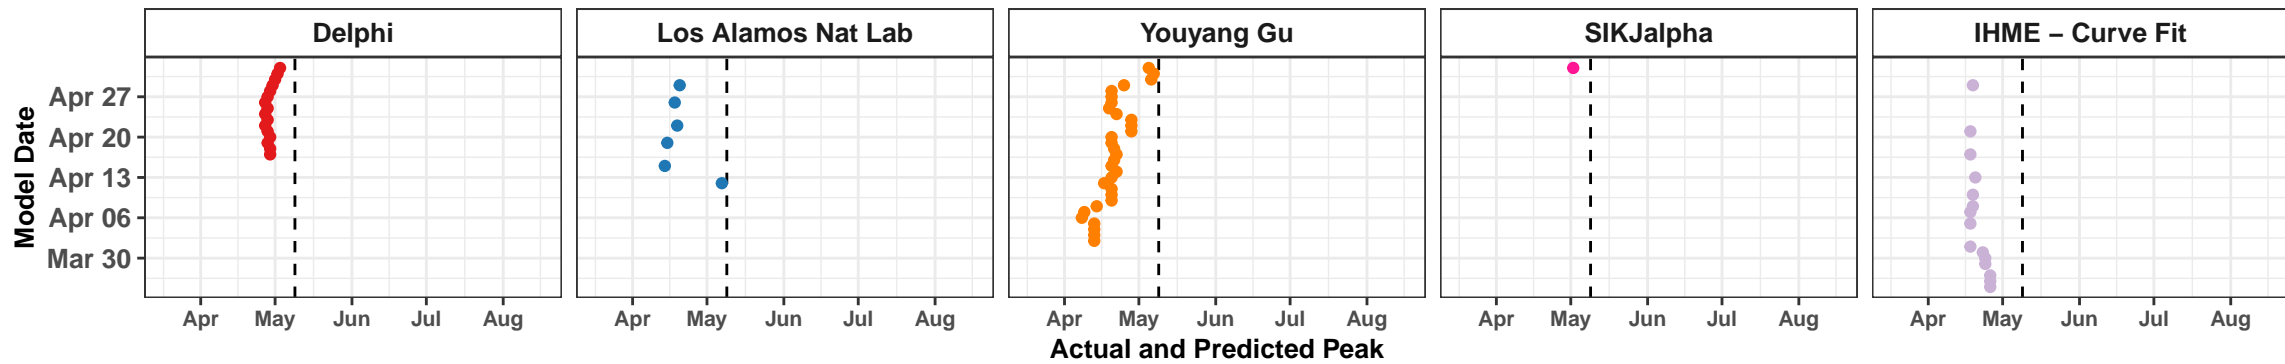



# Panama – Smoothed Daily Deaths

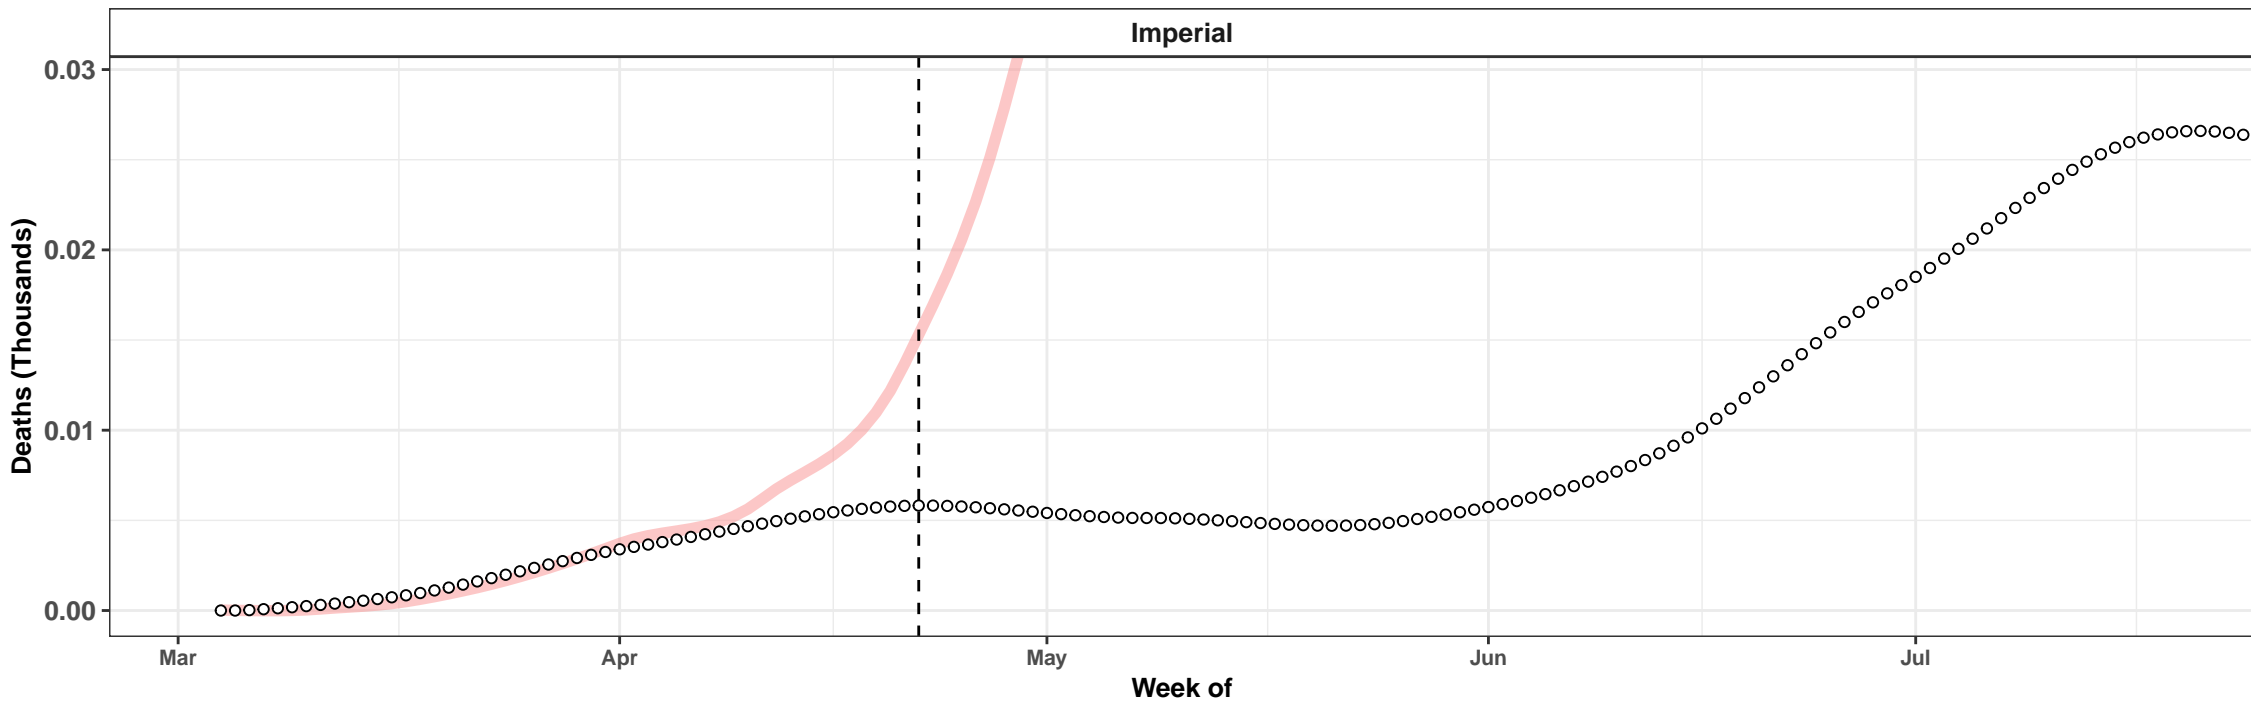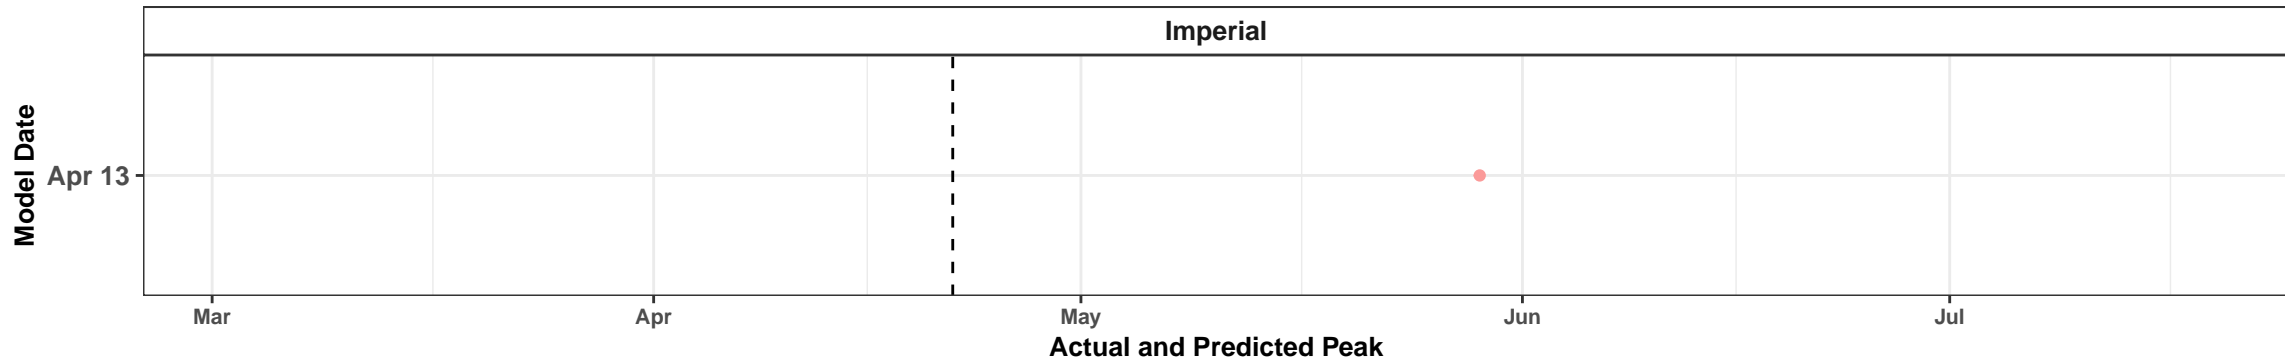

# Honduras – Smoothed Daily Deaths

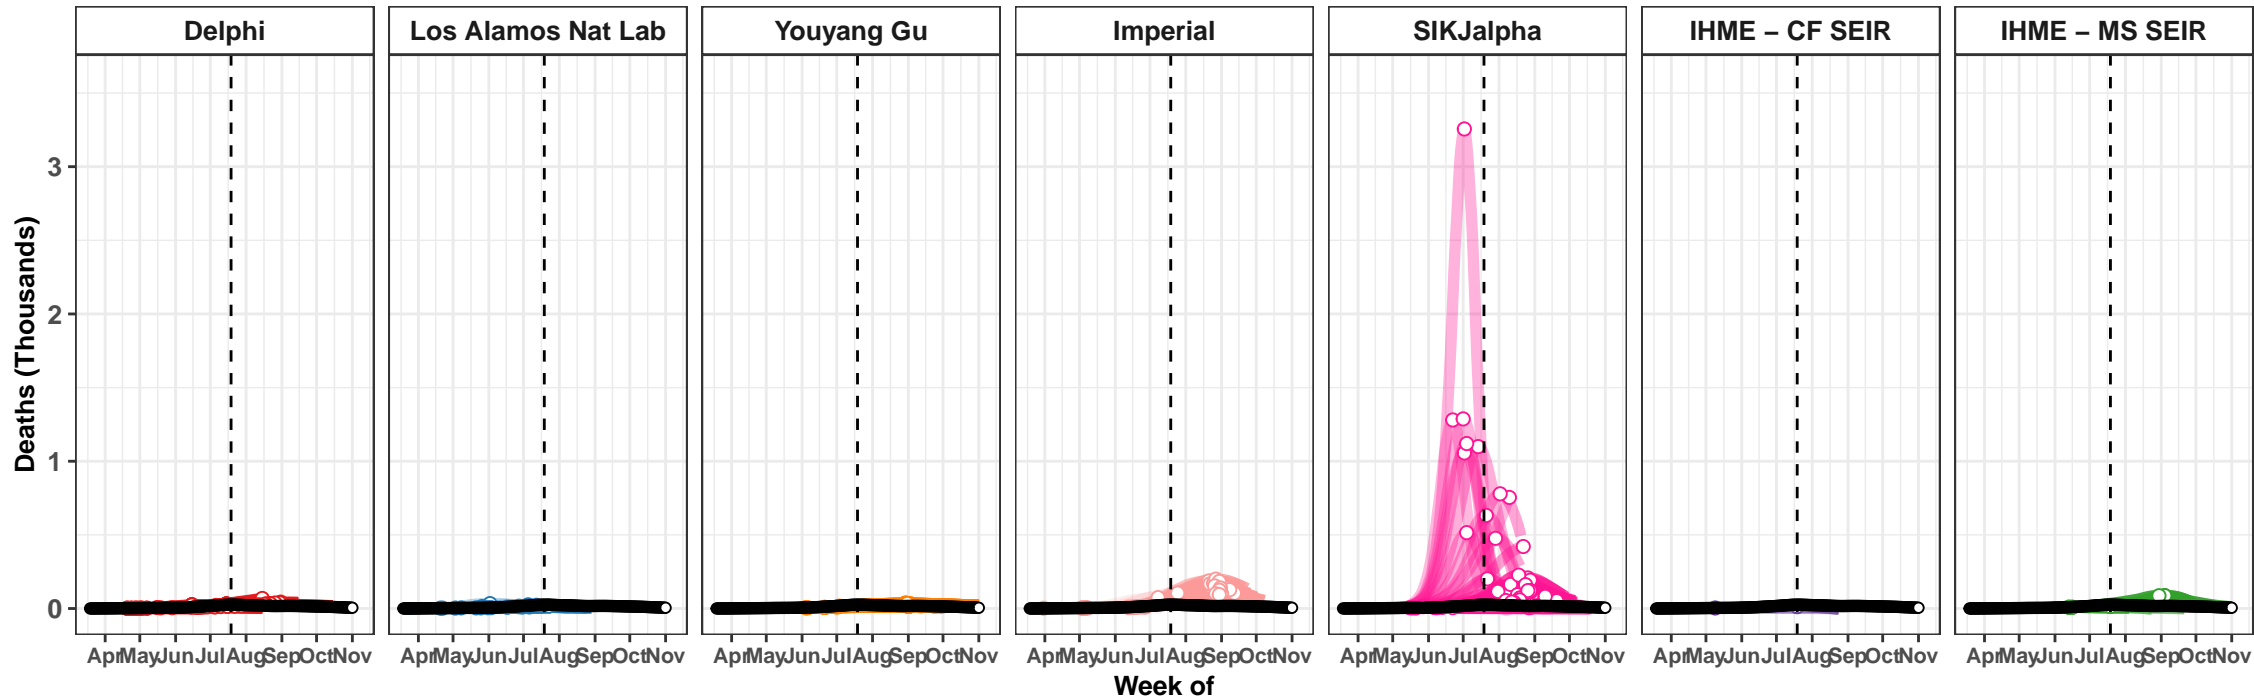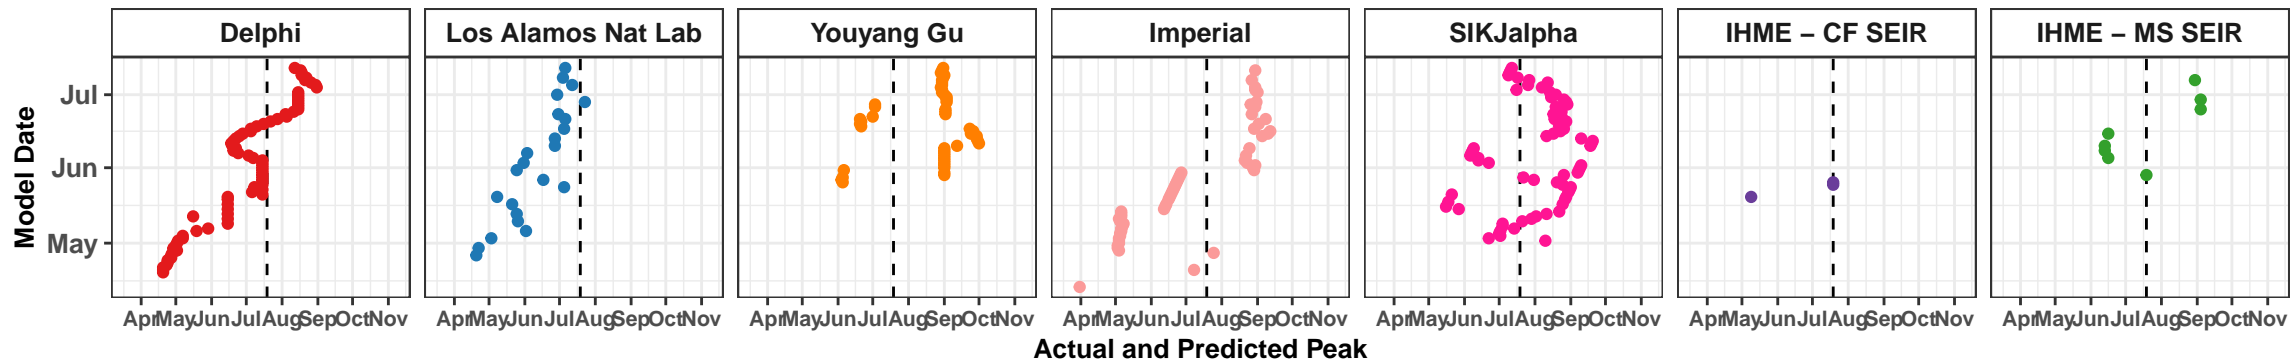

# Portugal – Smoothed Daily Deaths

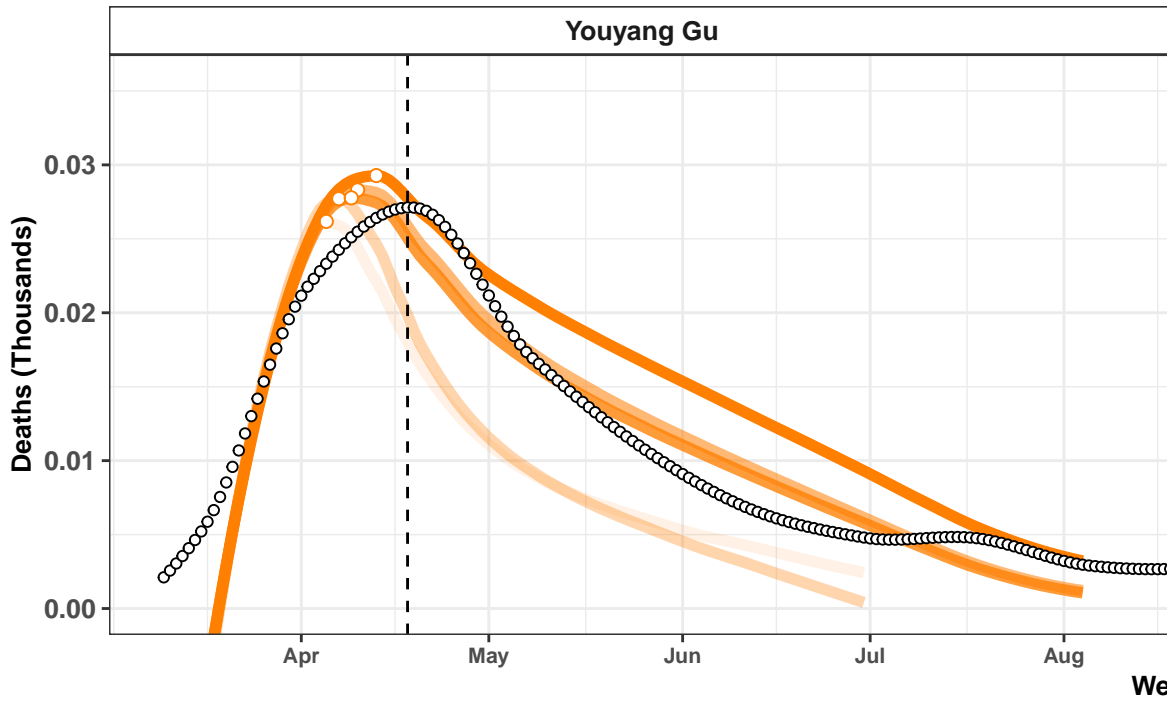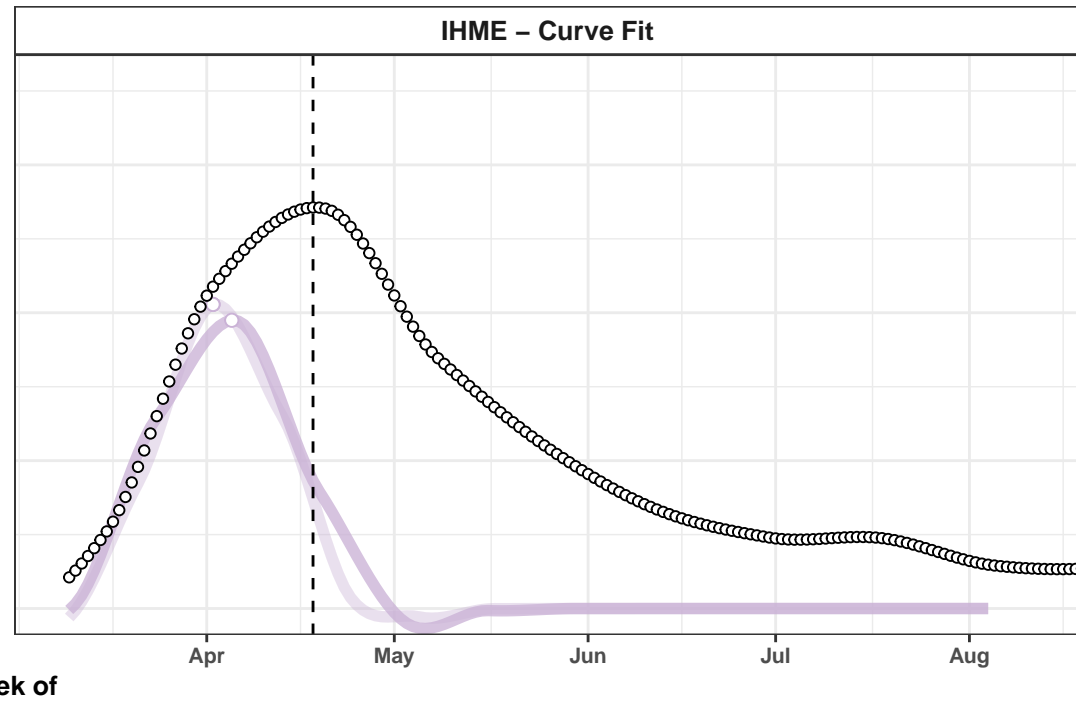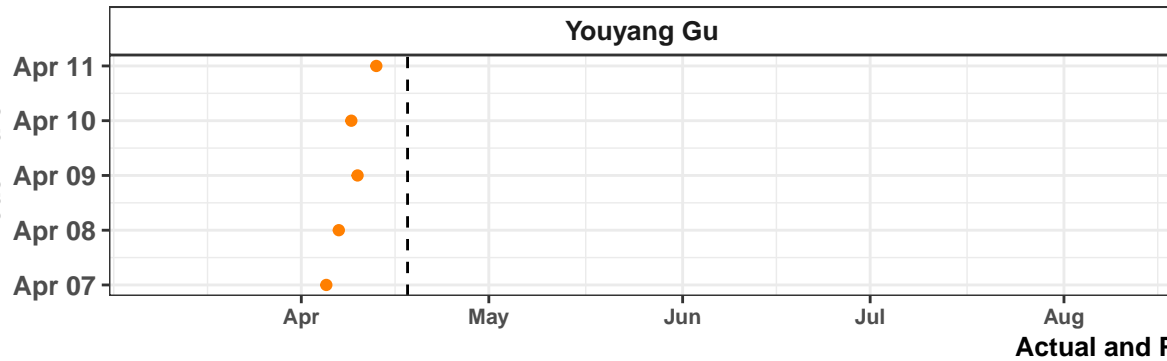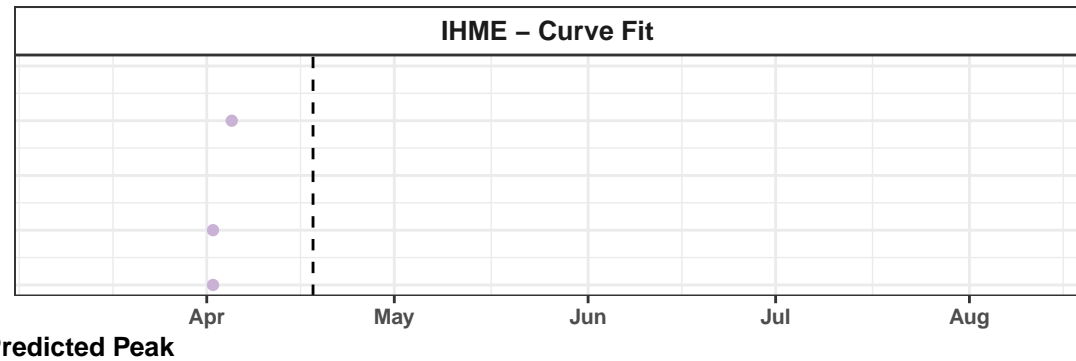

# Minnesota – Smoothed Daily Deaths

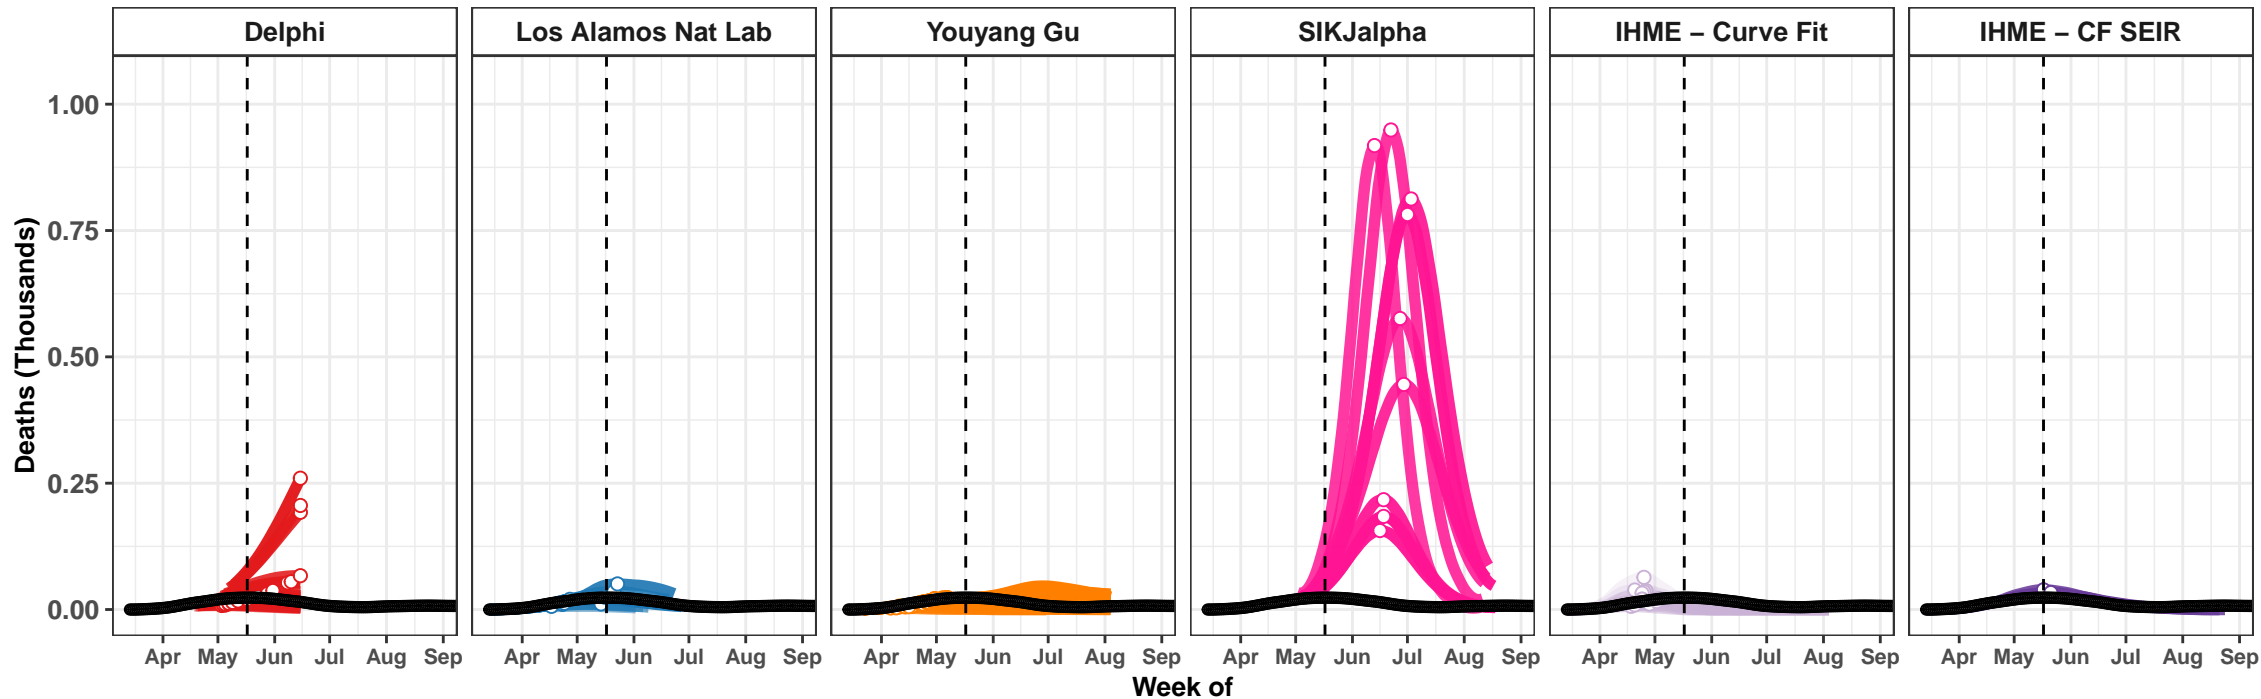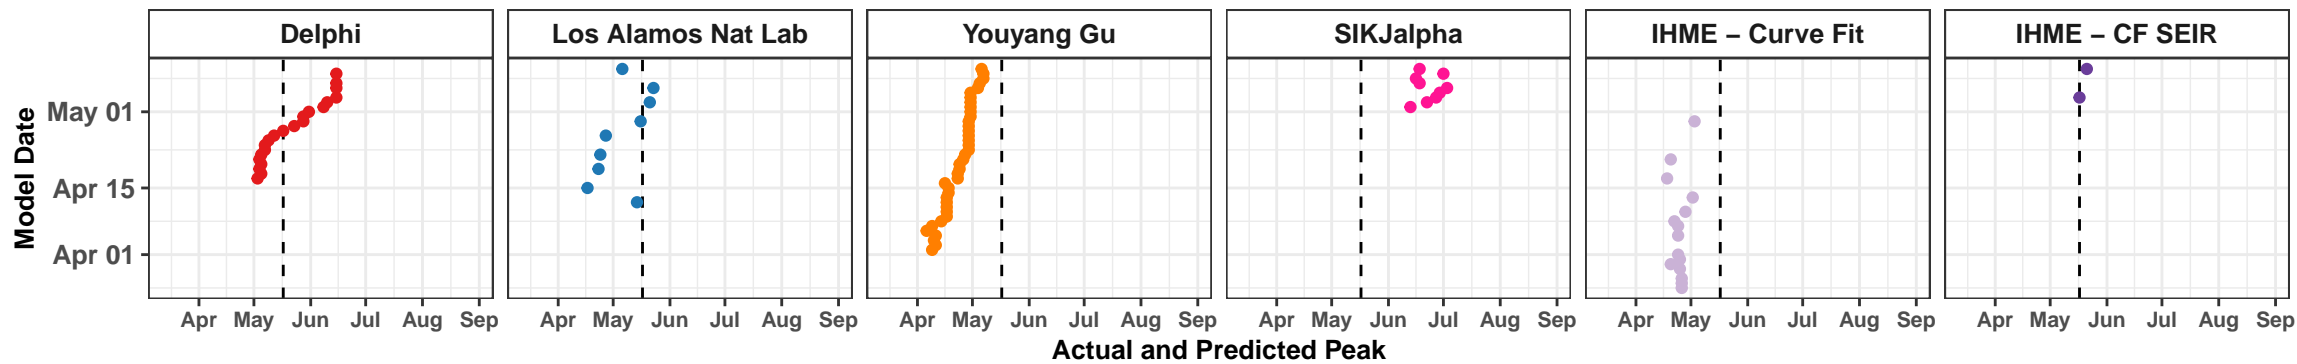

# Washington – Smoothed Daily Deaths

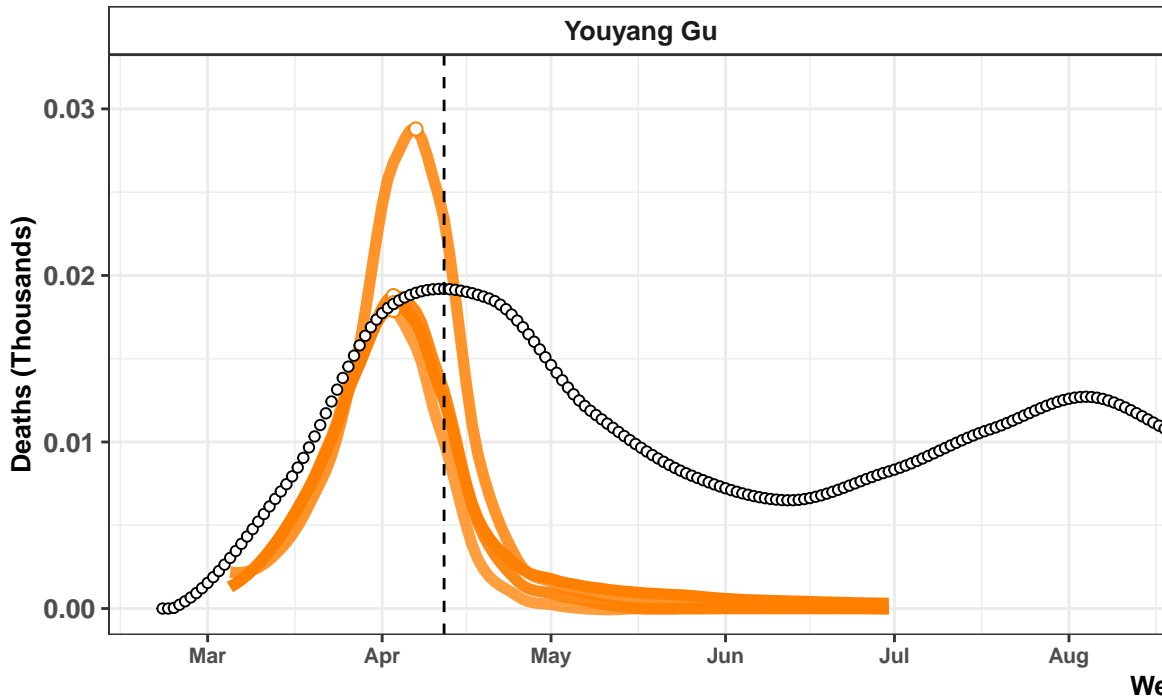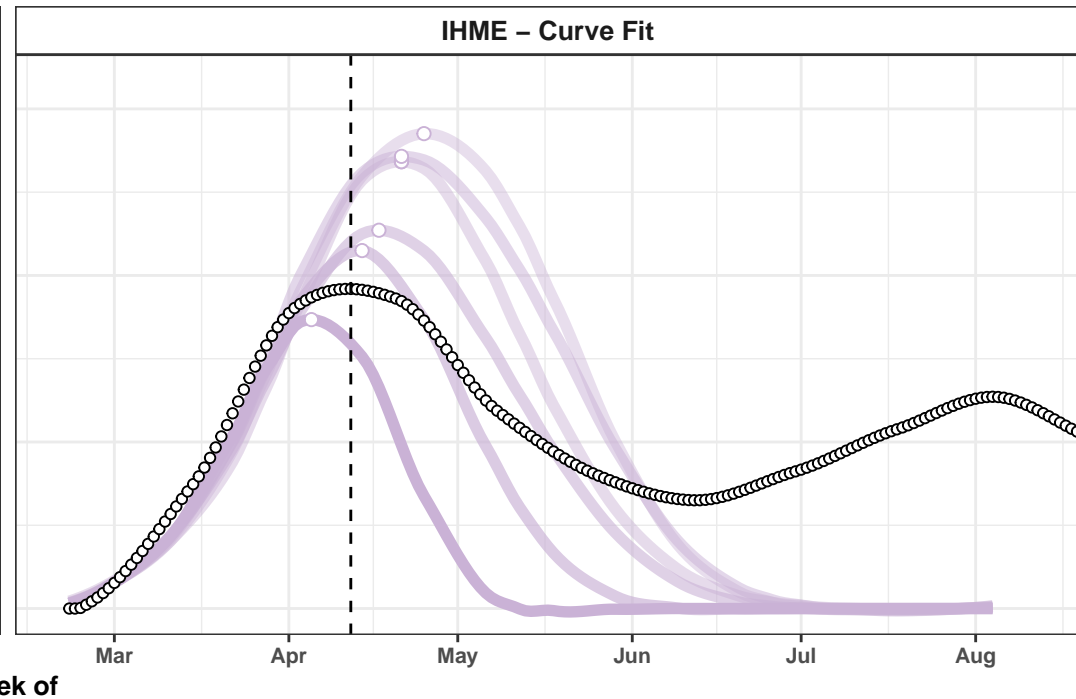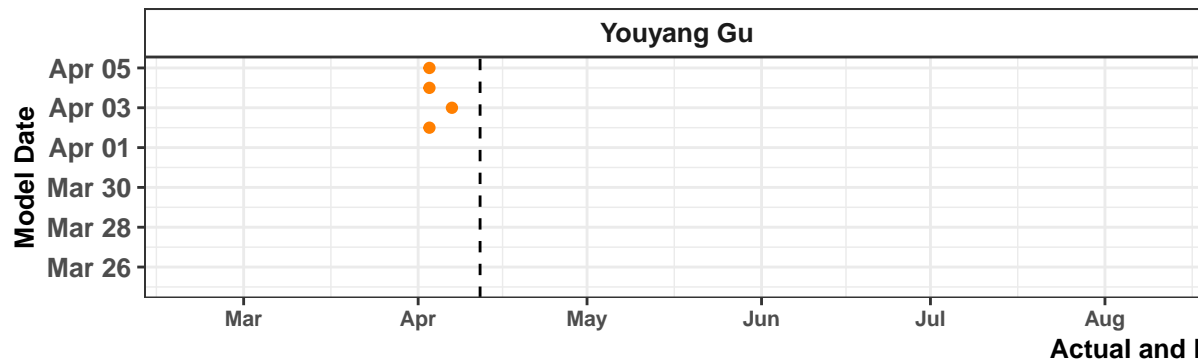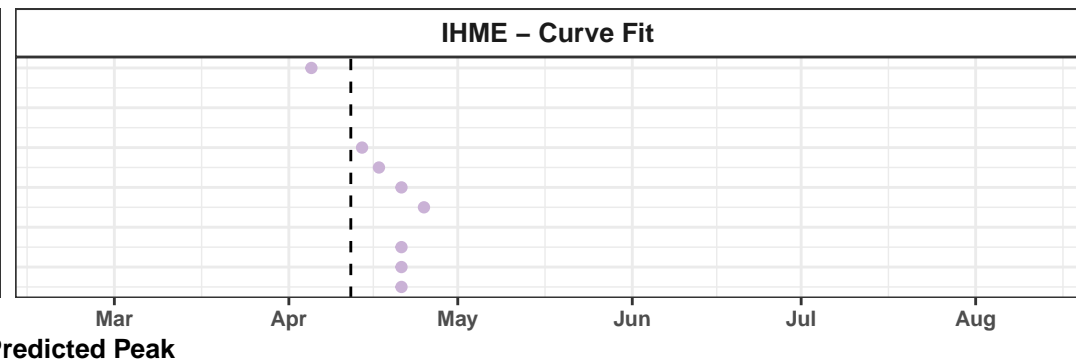

# Colorado – Smoothed Daily Deaths

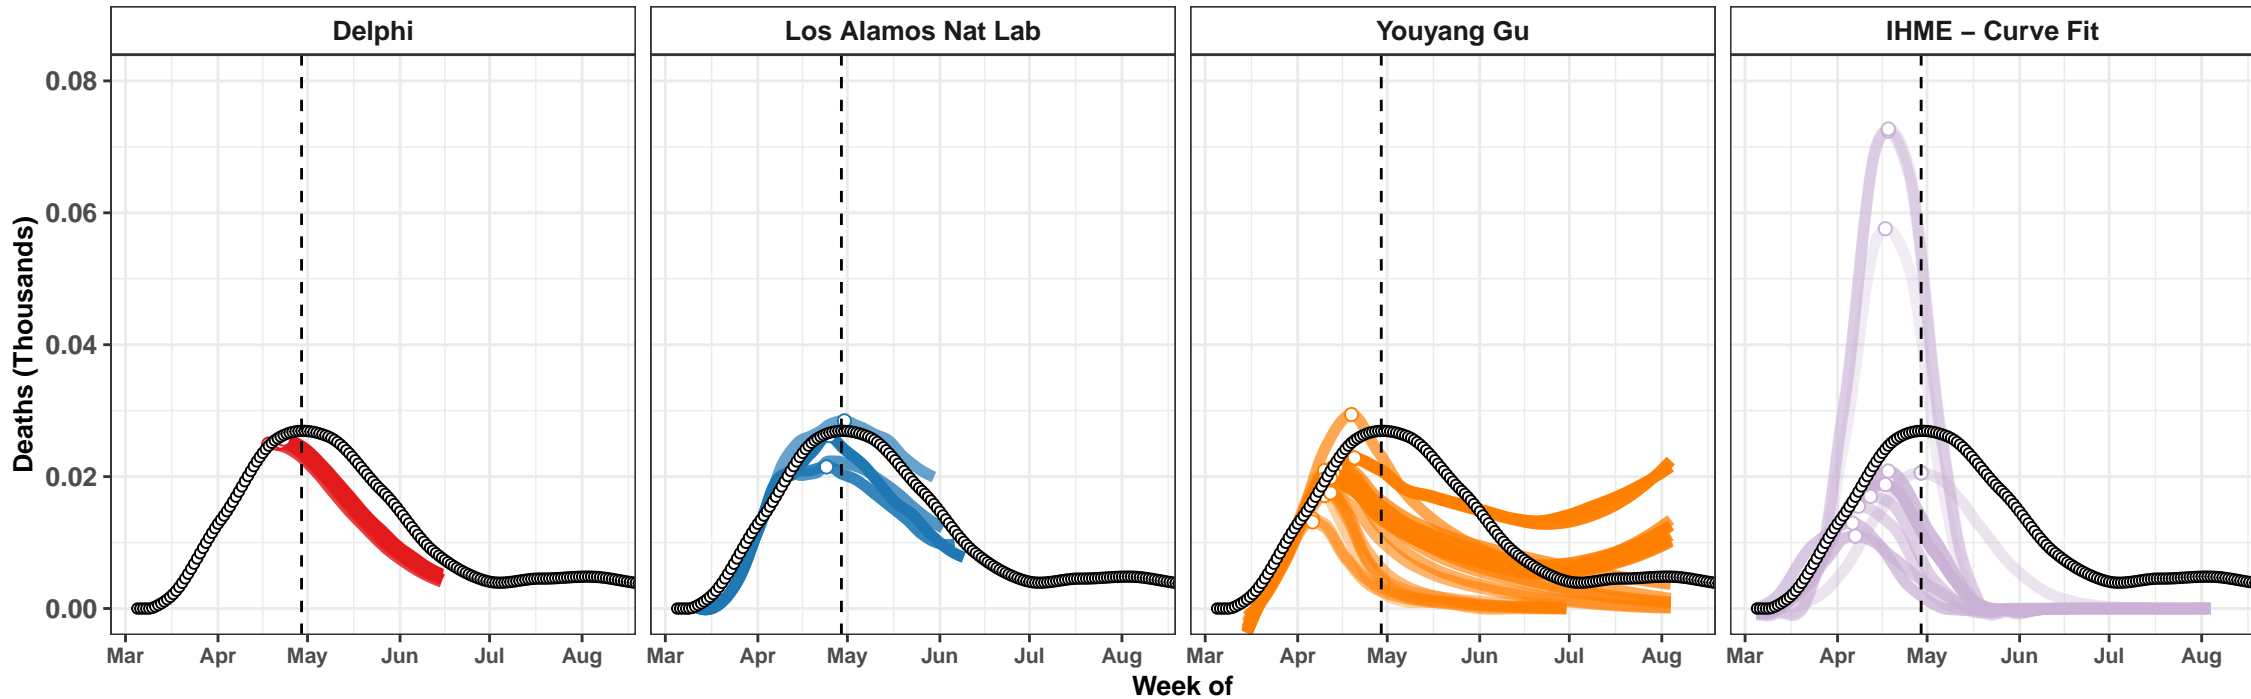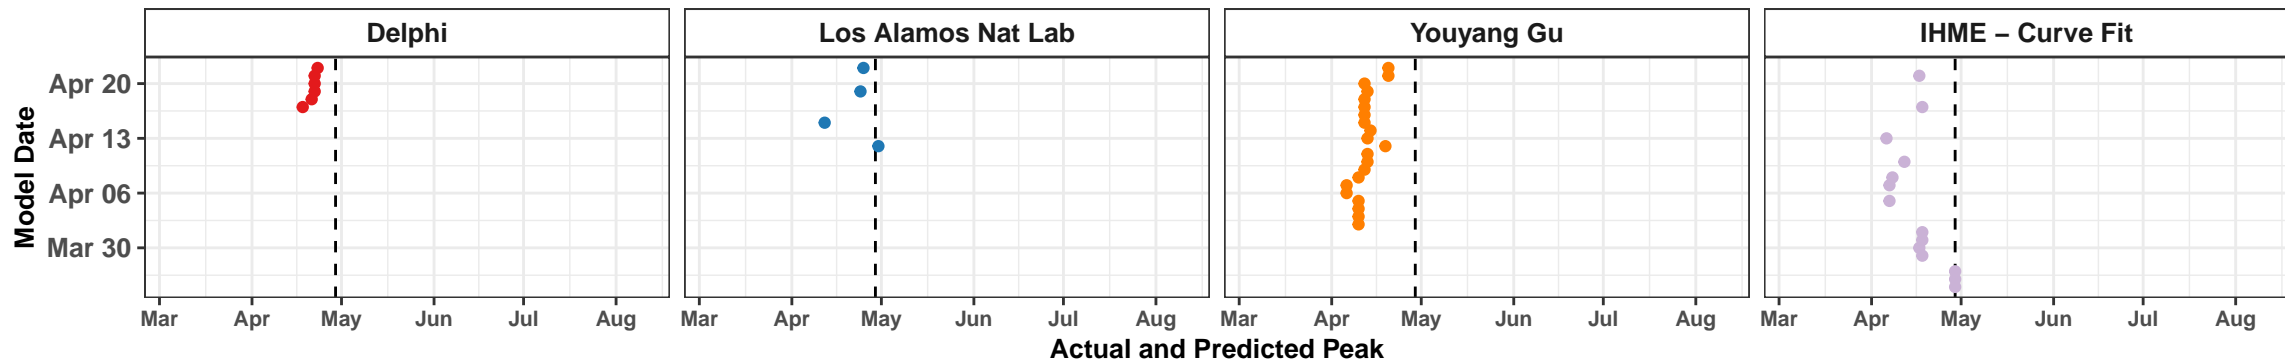

# Dominican Republic – Smoothed Daily Deaths

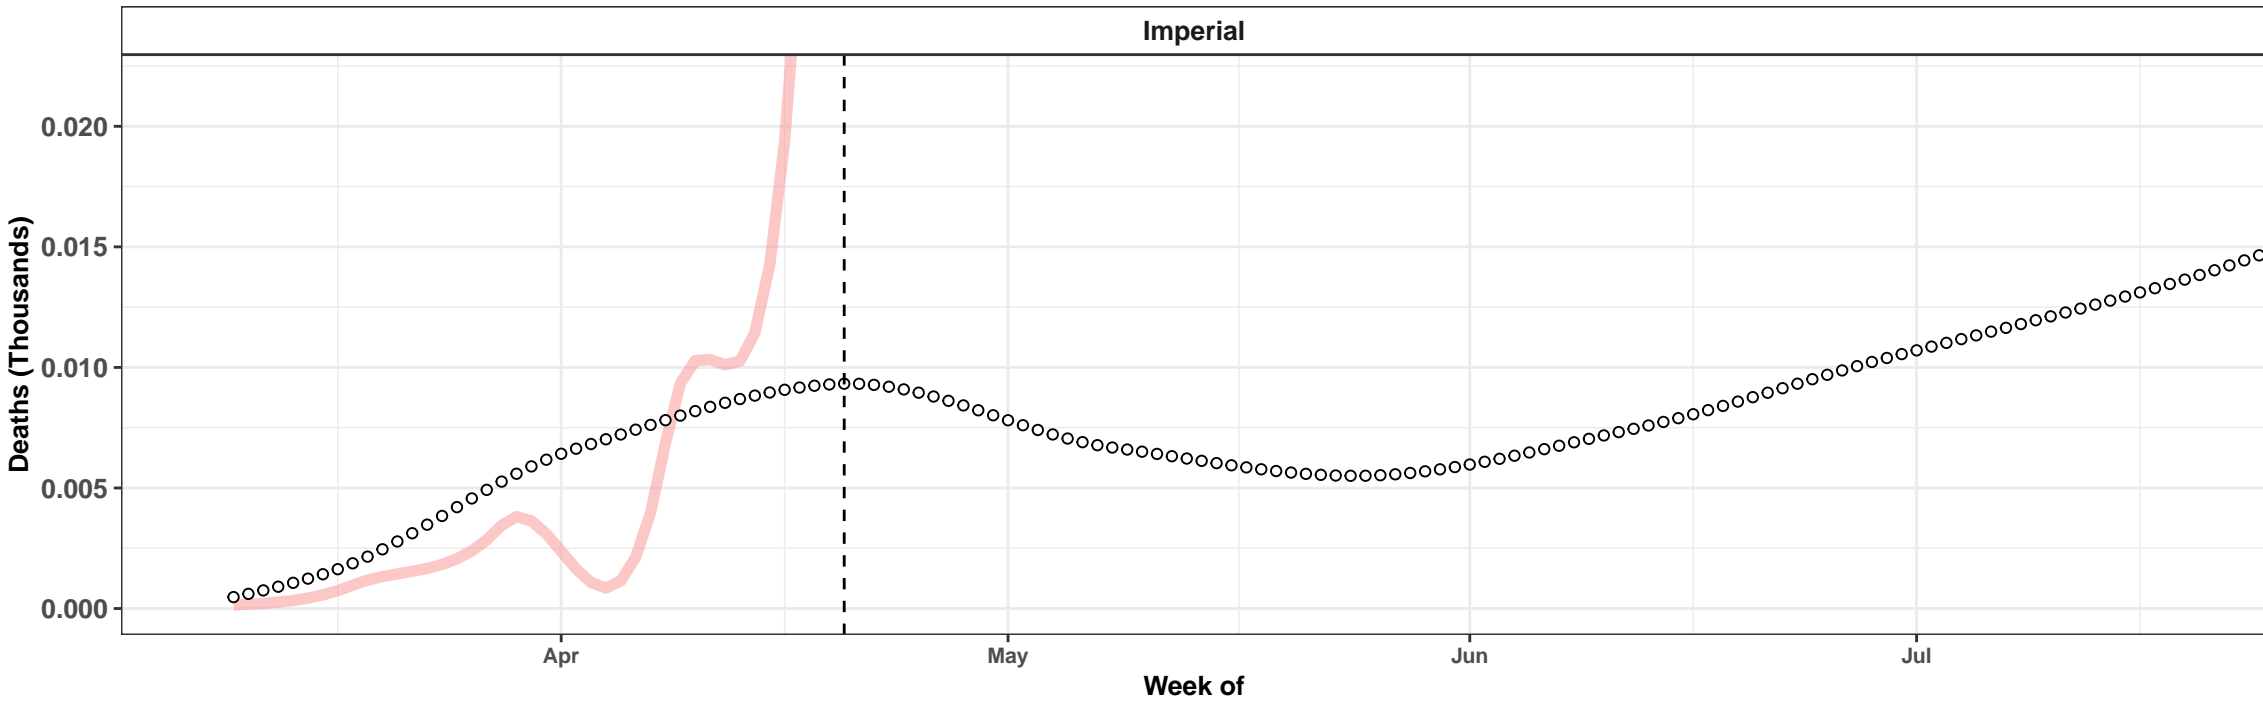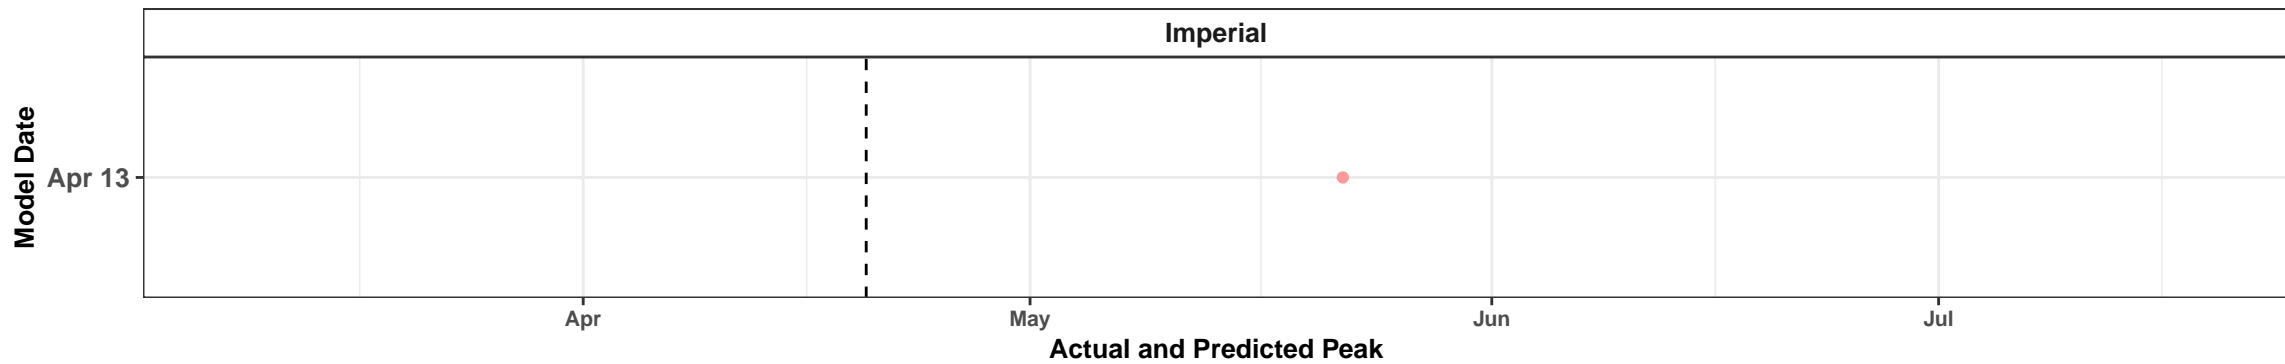

# Wisconsin – Smoothed Daily Deaths

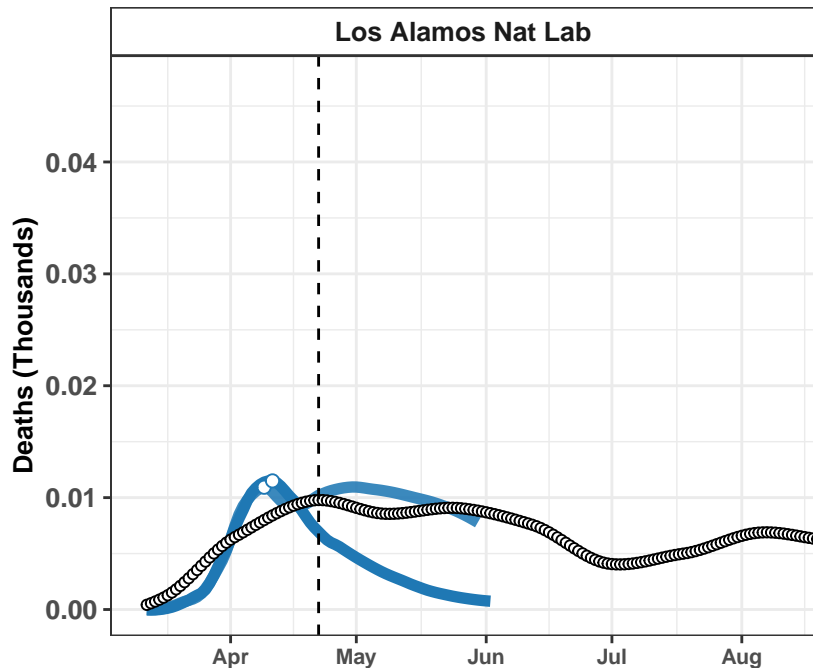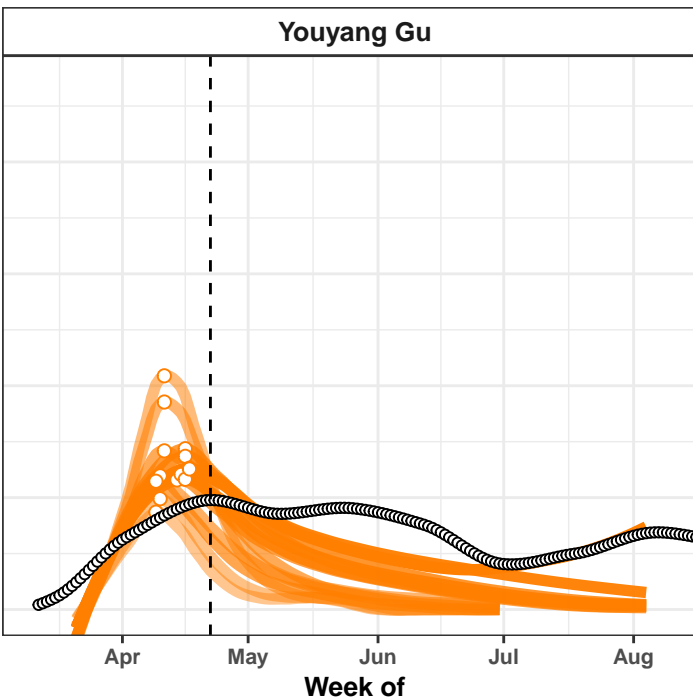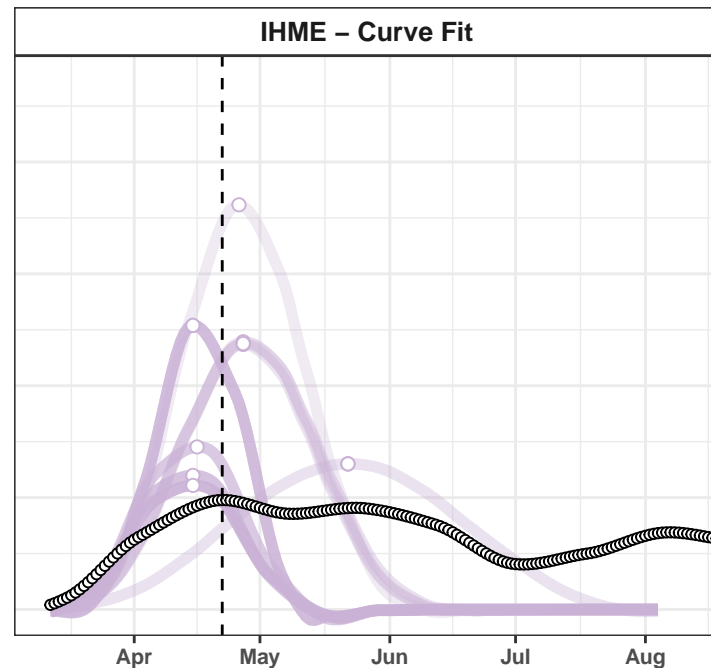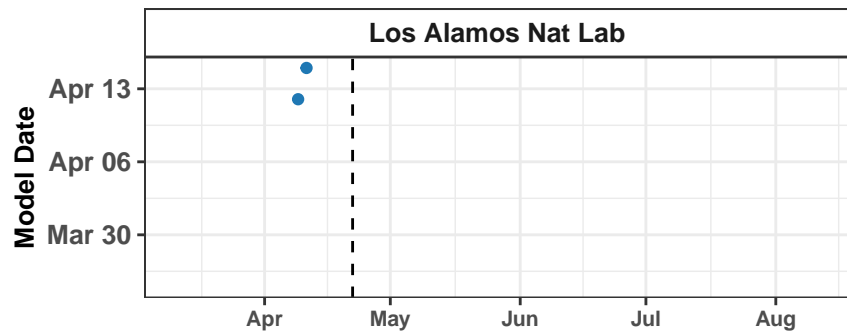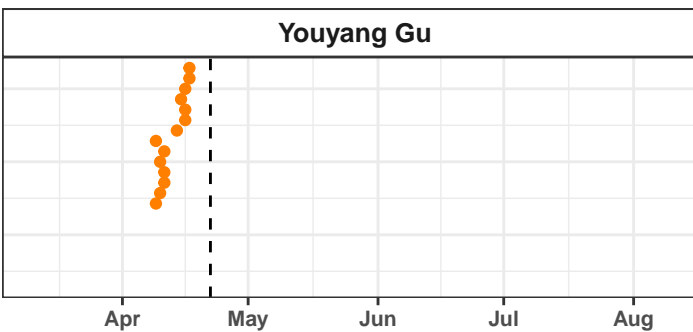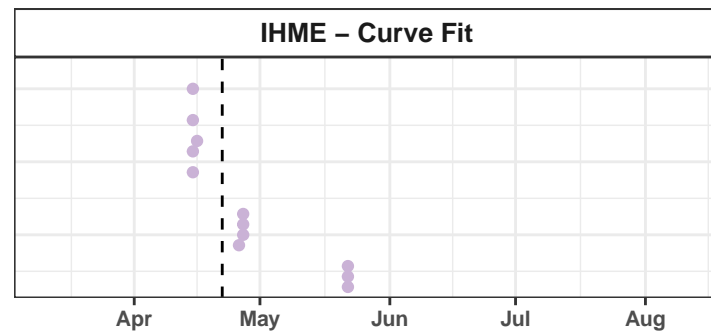





# Ireland – Smoothed Daily Deaths

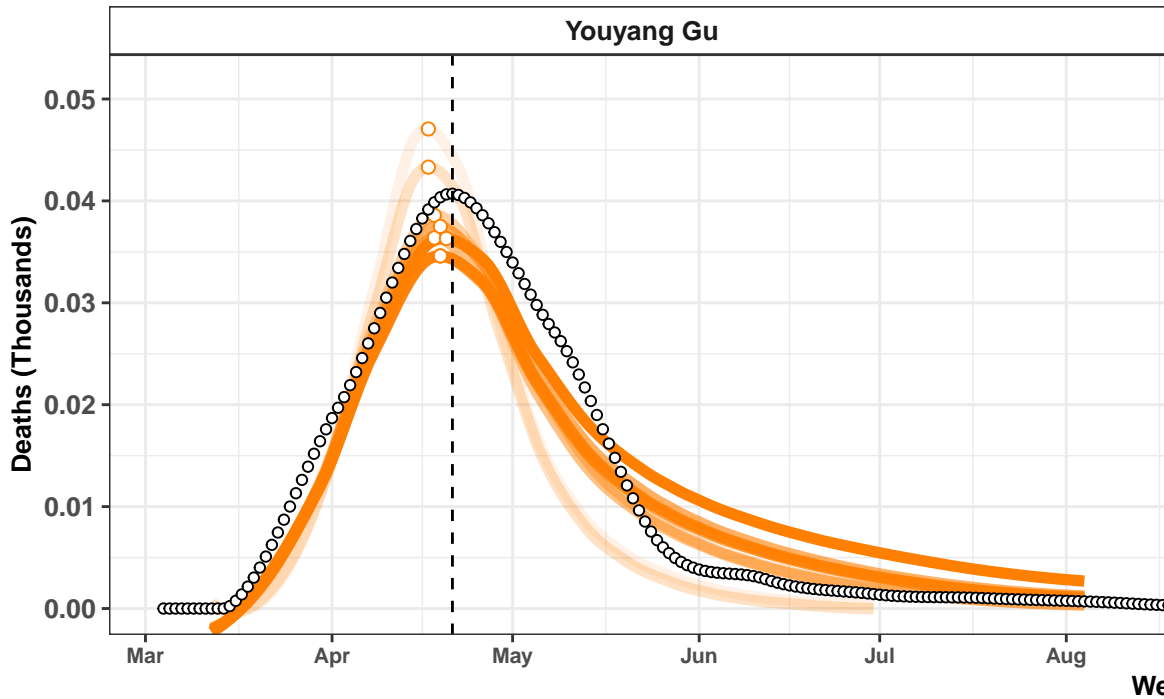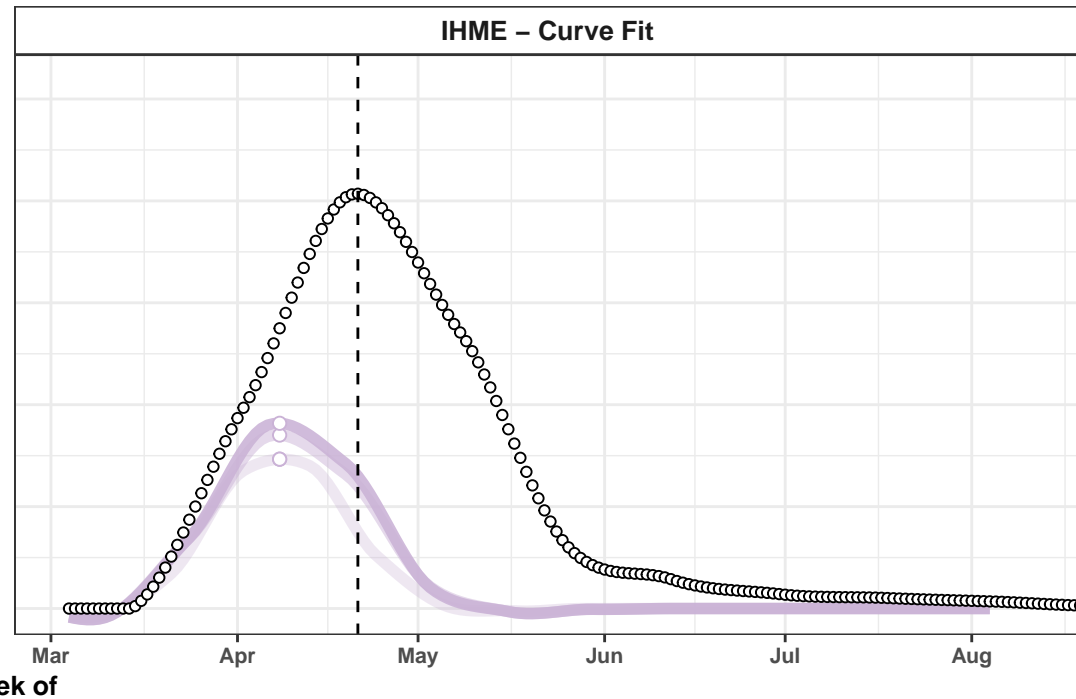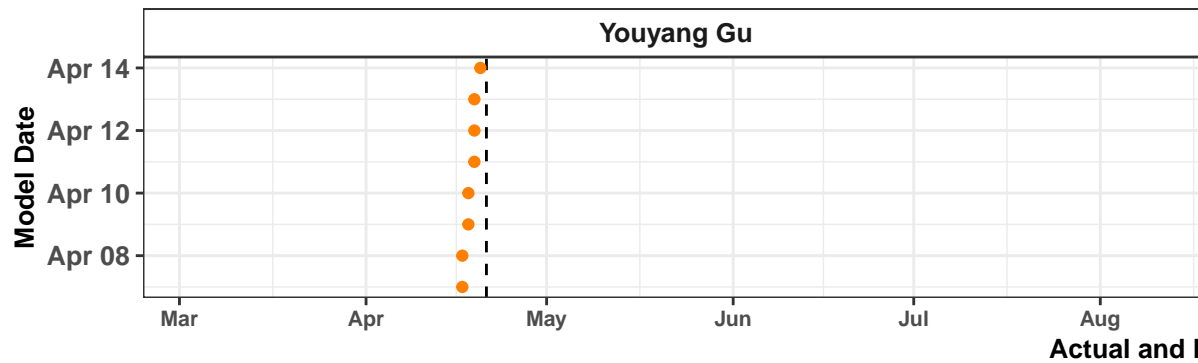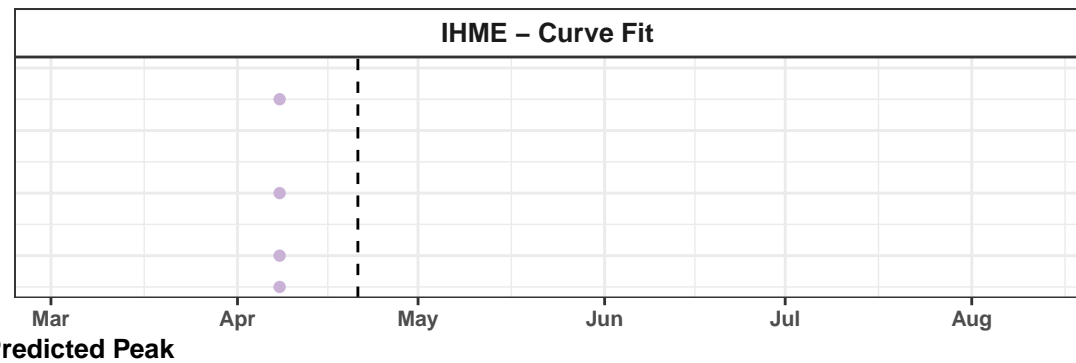

# Kazakhstan – Smoothed Daily Deaths

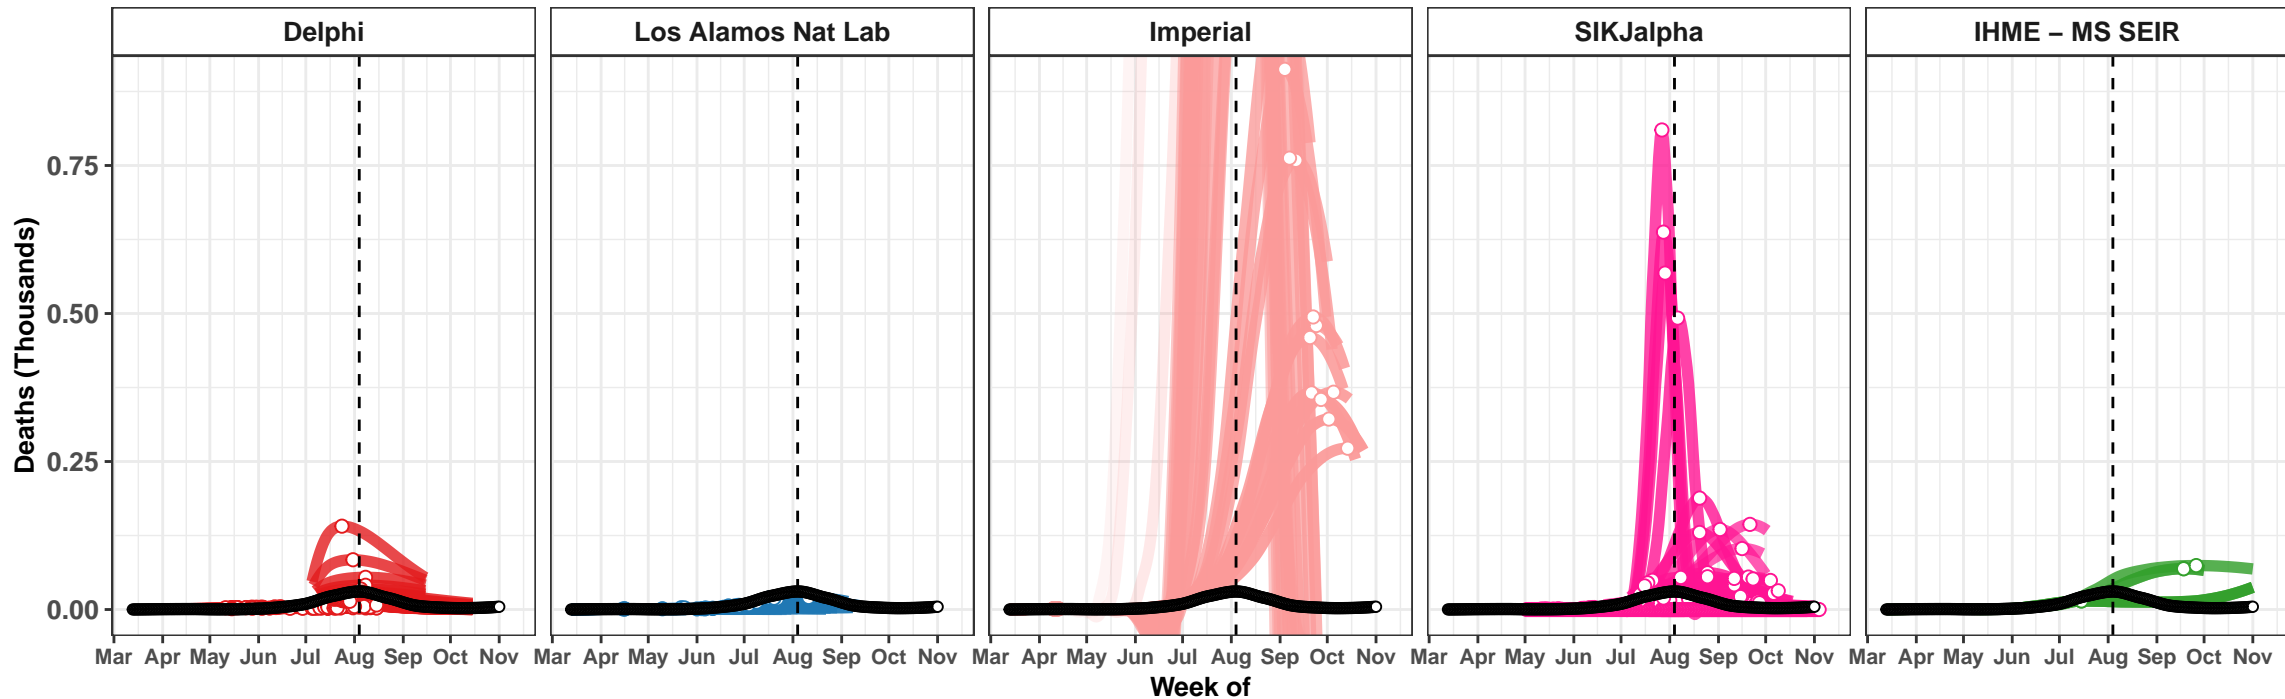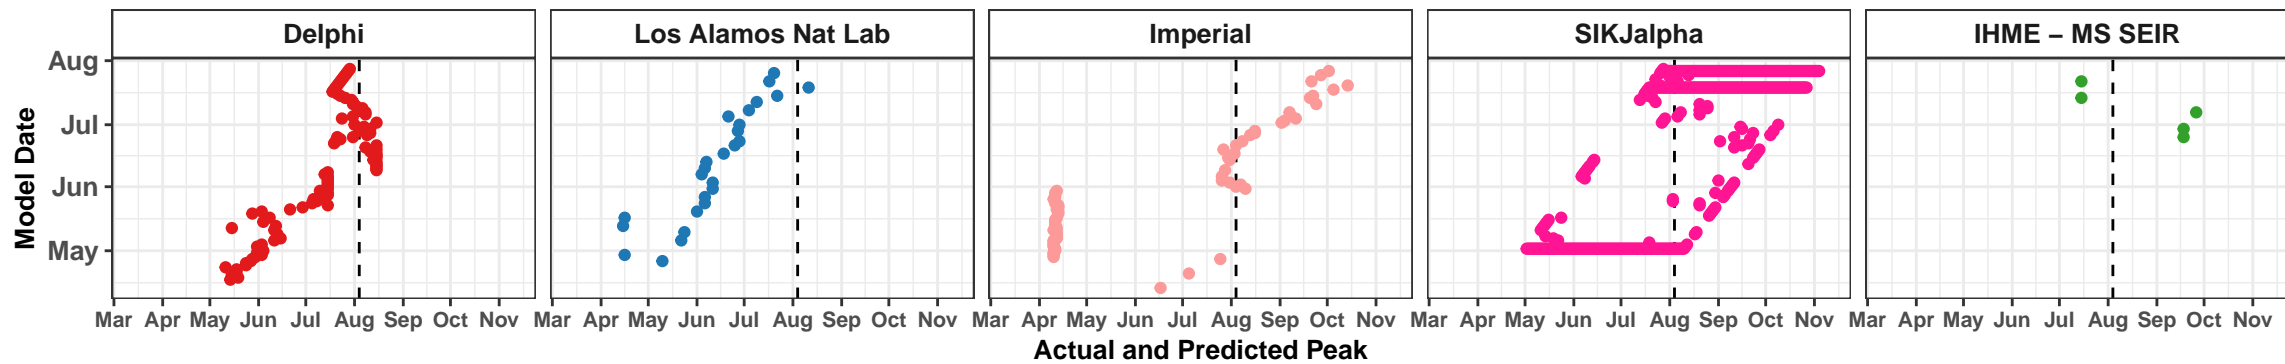

# Hungary – Smoothed Daily Deaths

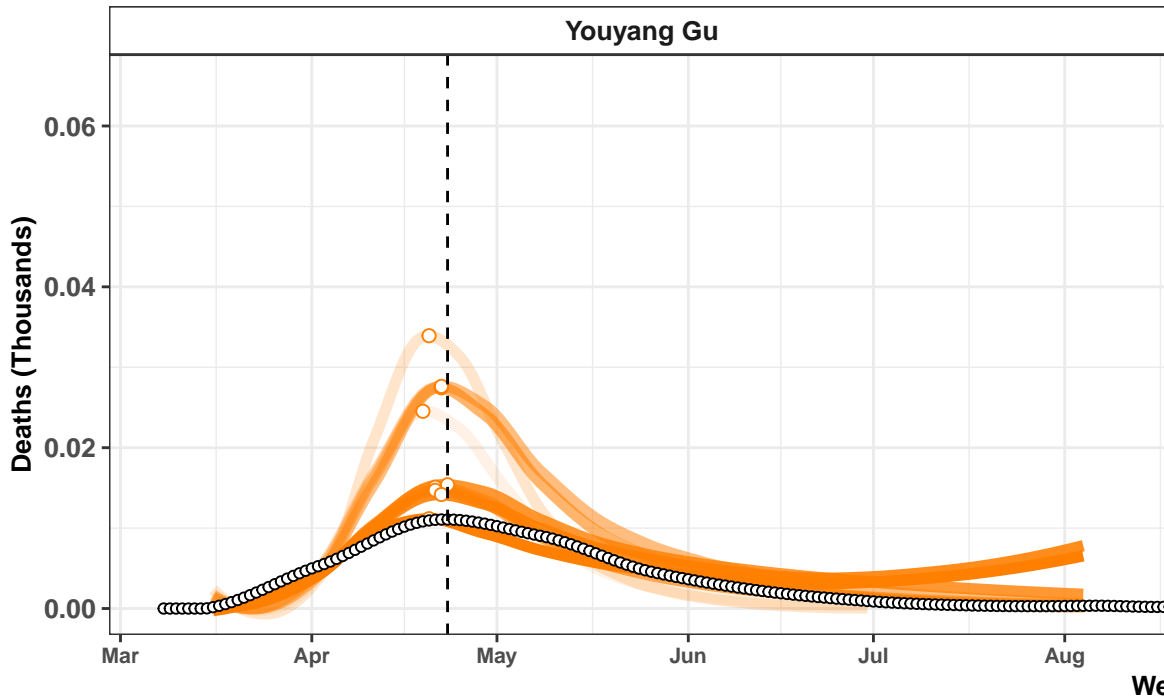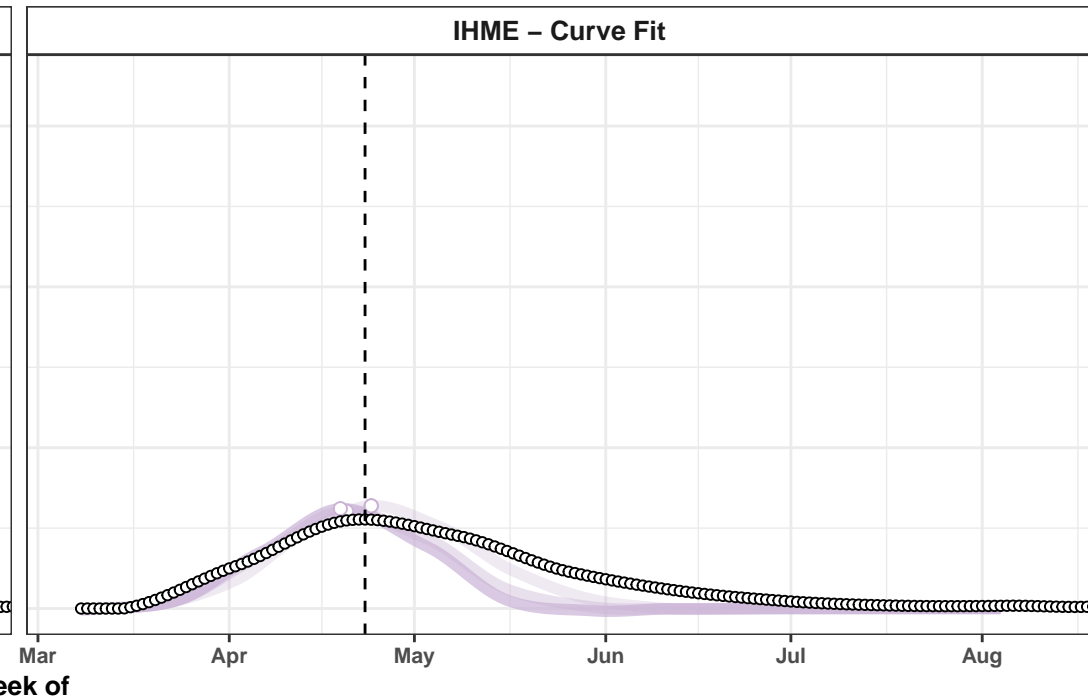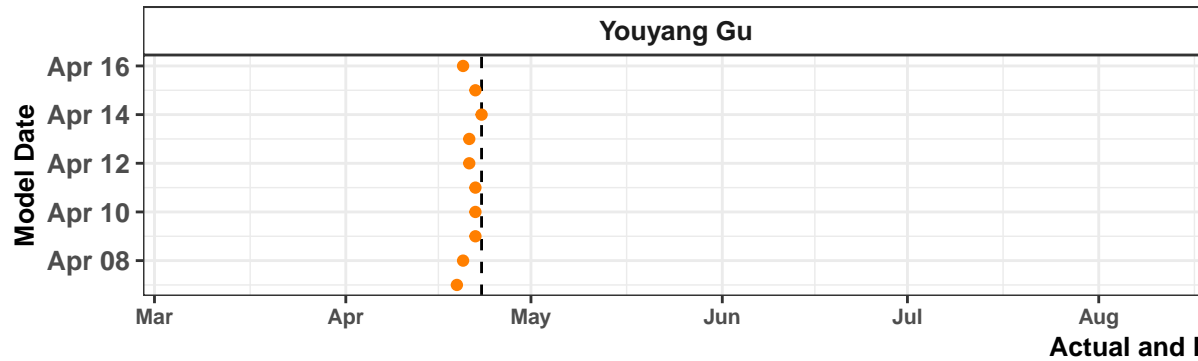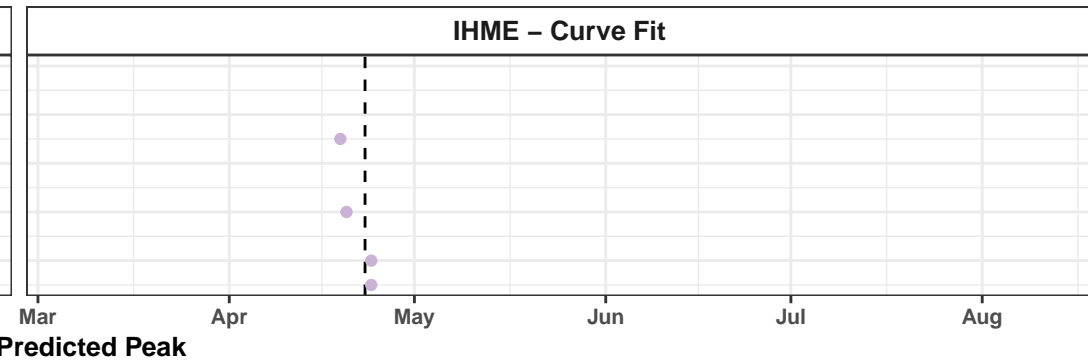

# Moldova – Smoothed Daily Deaths

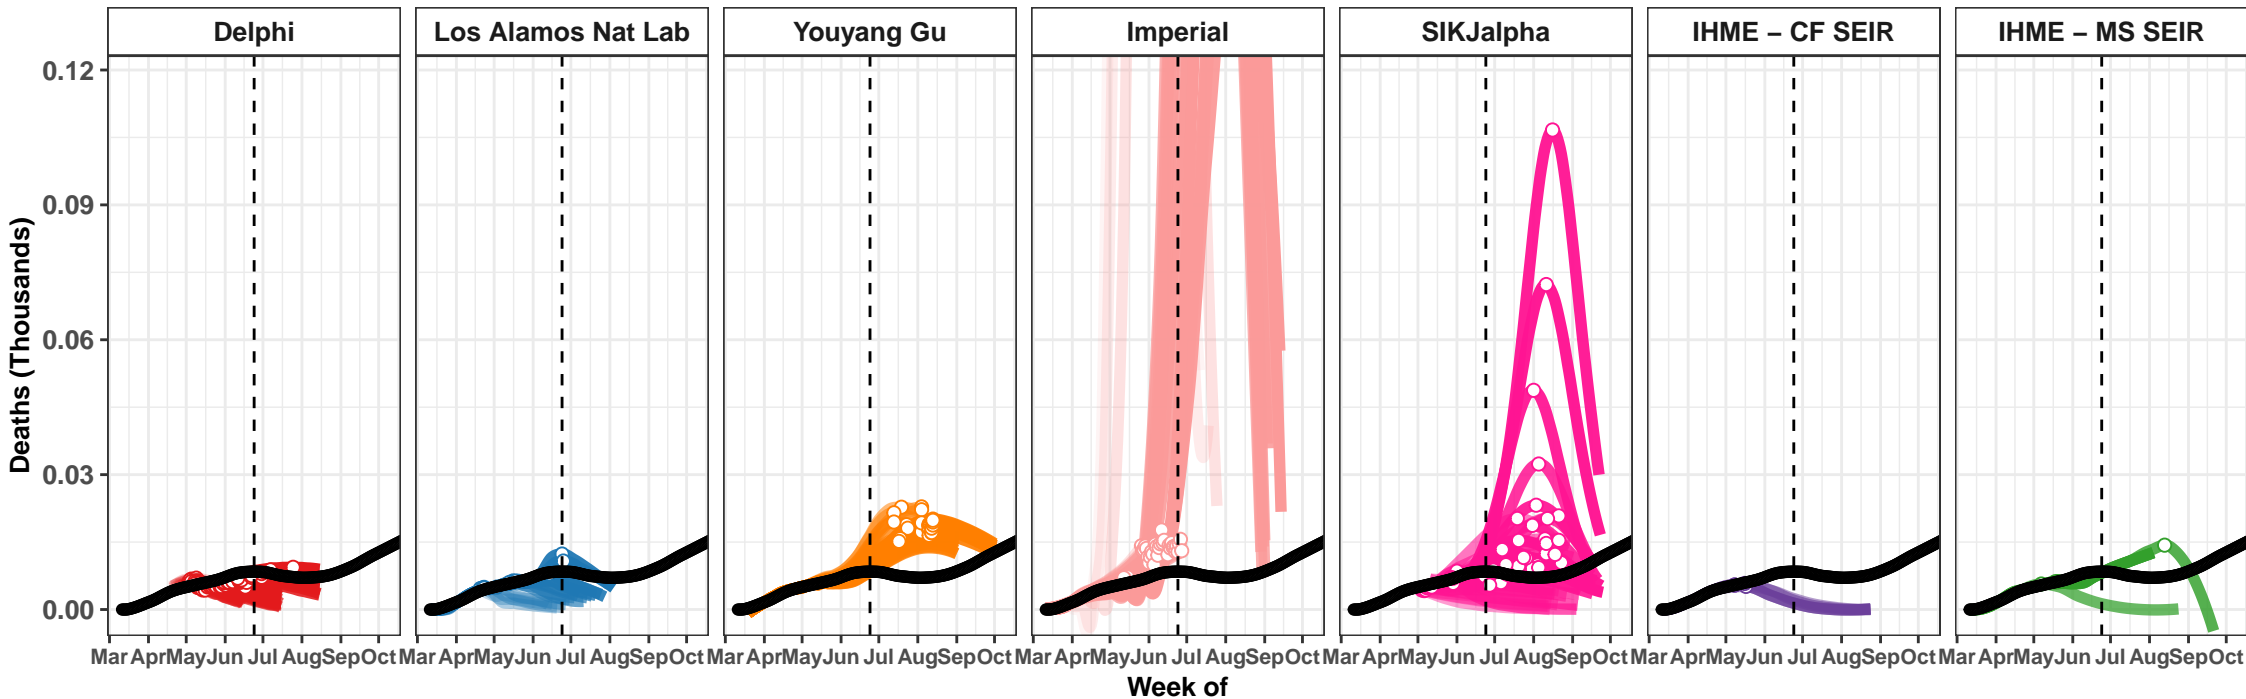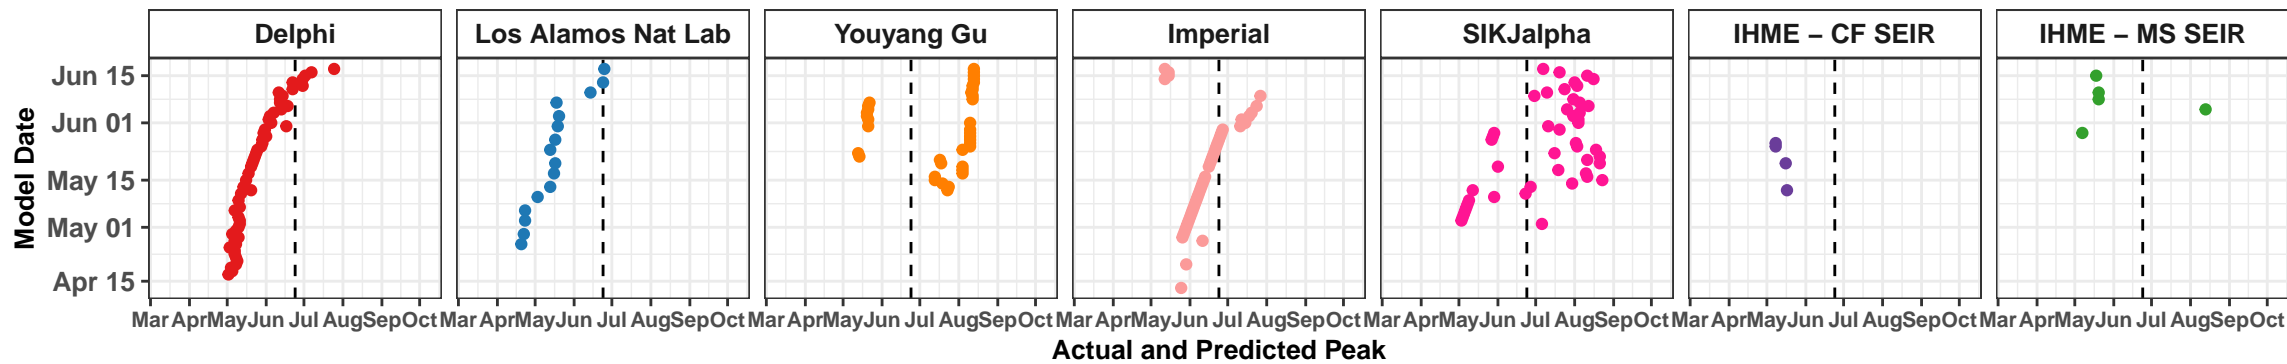

# Nevada – Smoothed Daily Deaths

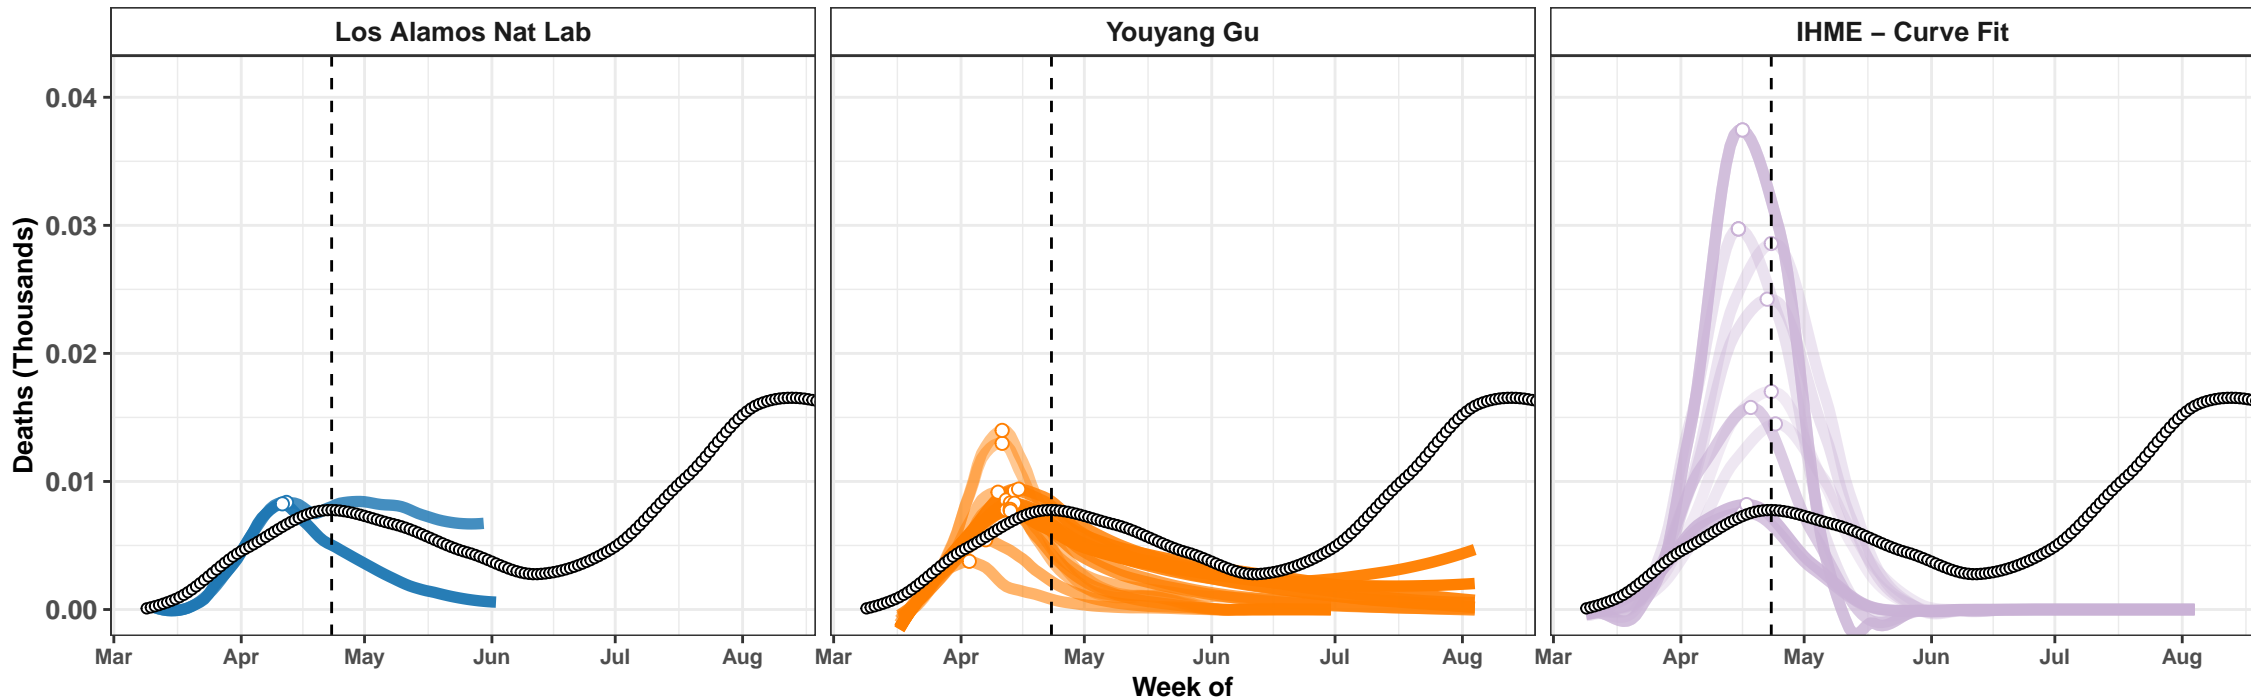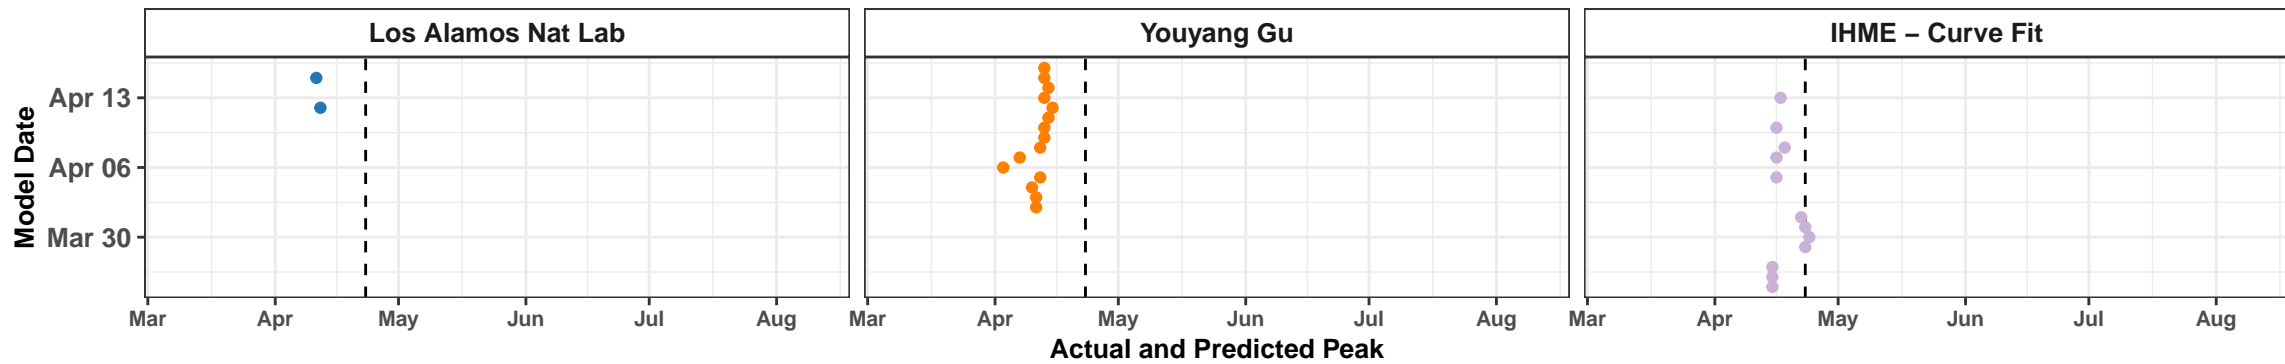

# Japan – Smoothed Daily Deaths

Delphi

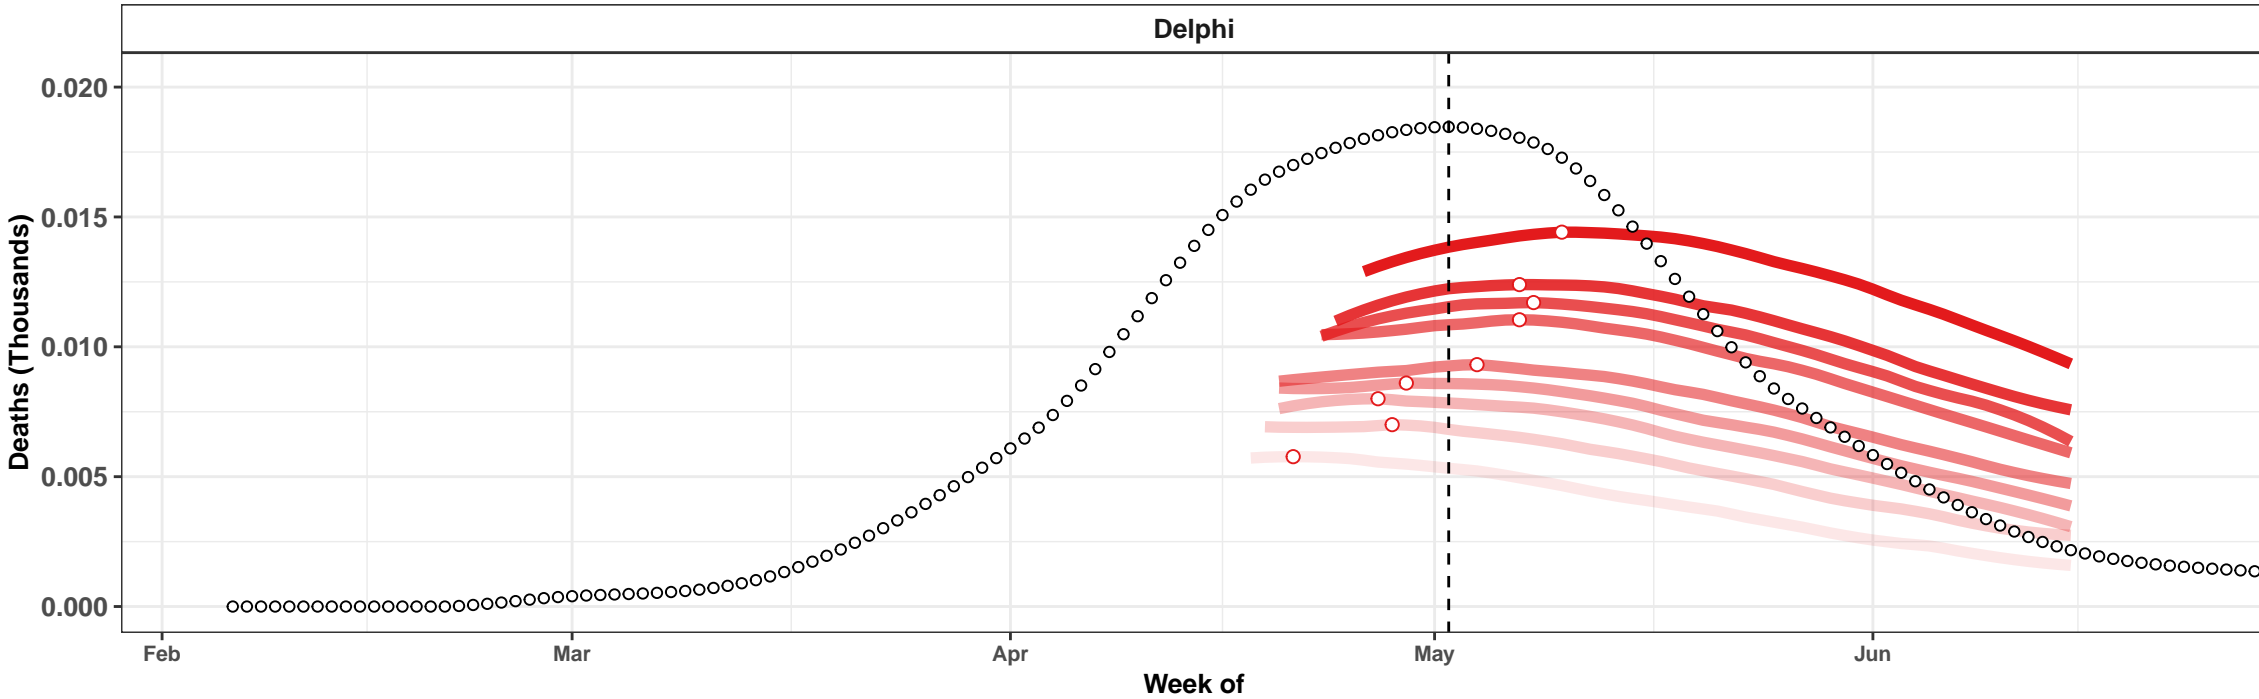

Delphi

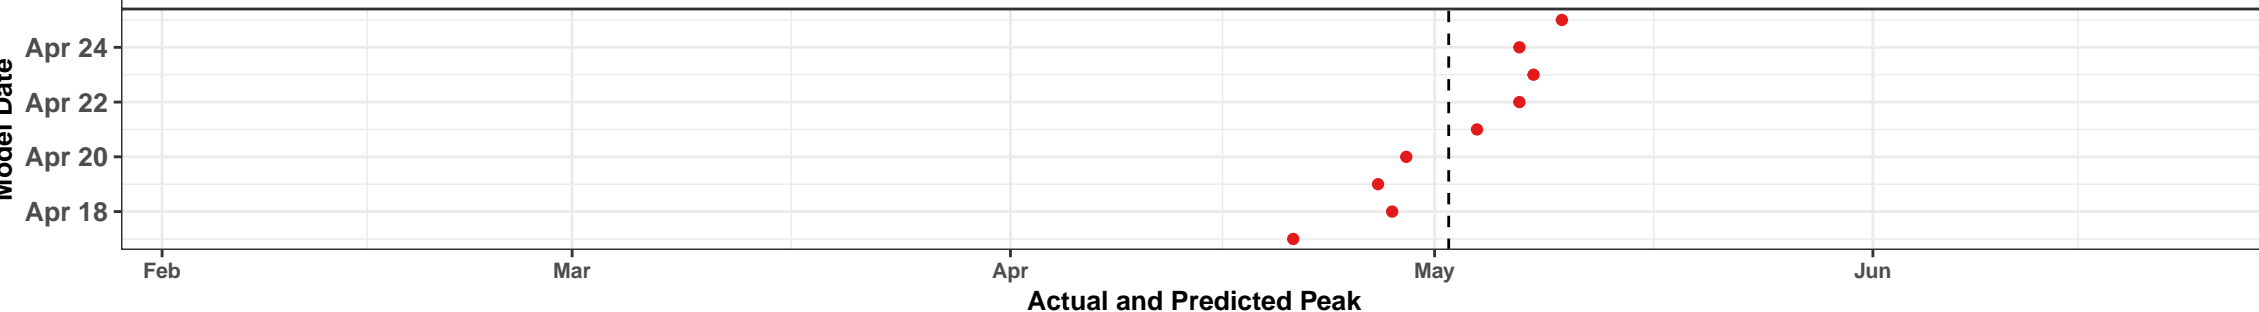

# Iowa – Smoothed Daily Deaths

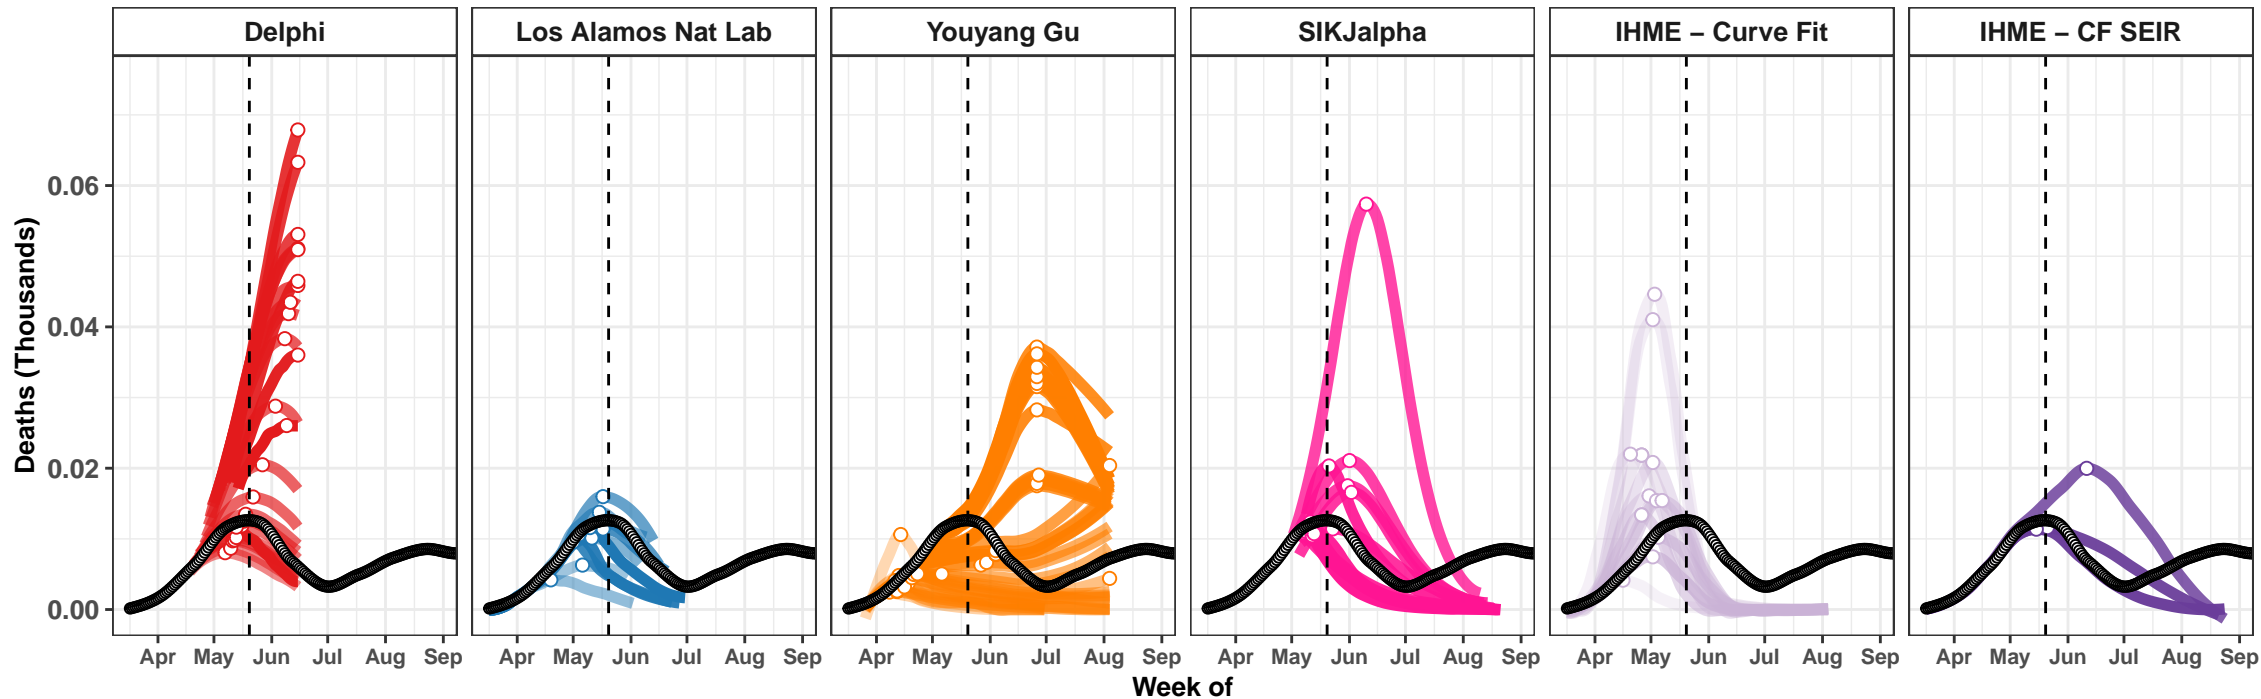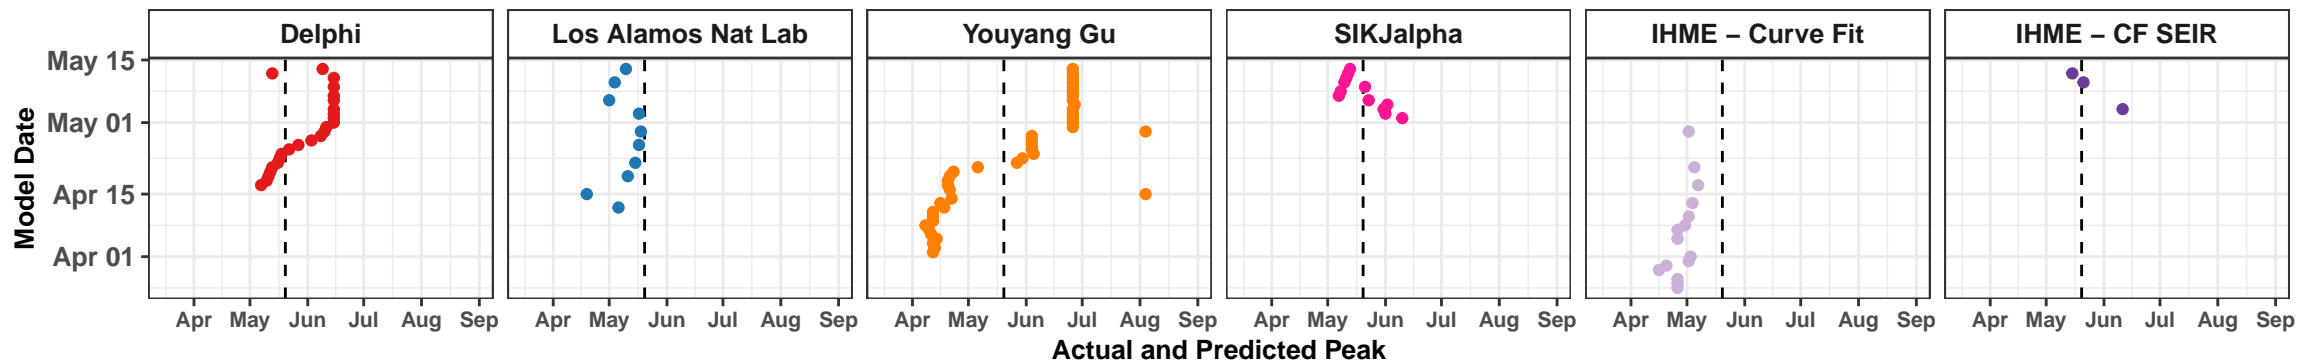



# Kentucky – Smoothed Daily Deaths

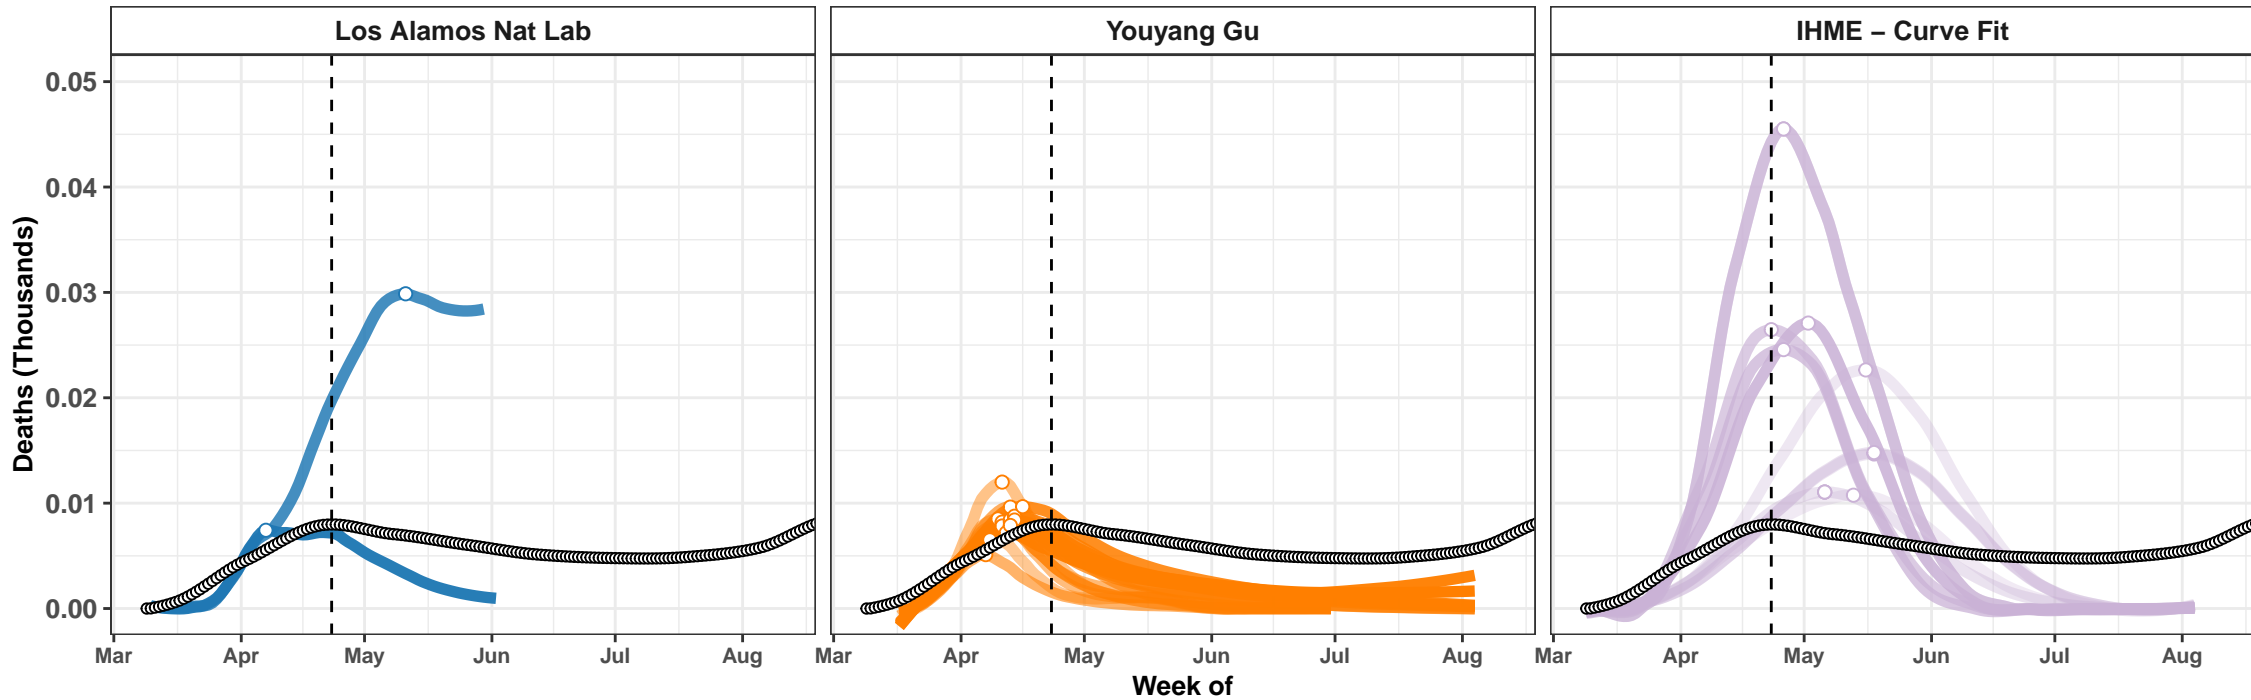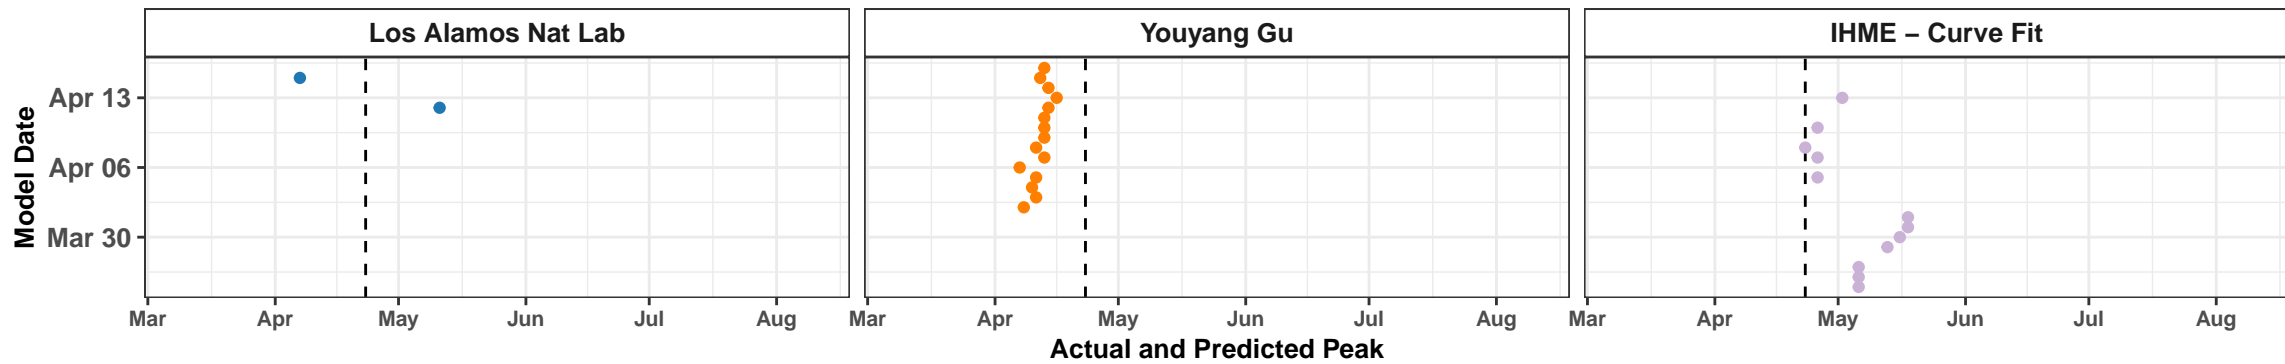

# Afghanistan – Smoothed Daily Deaths

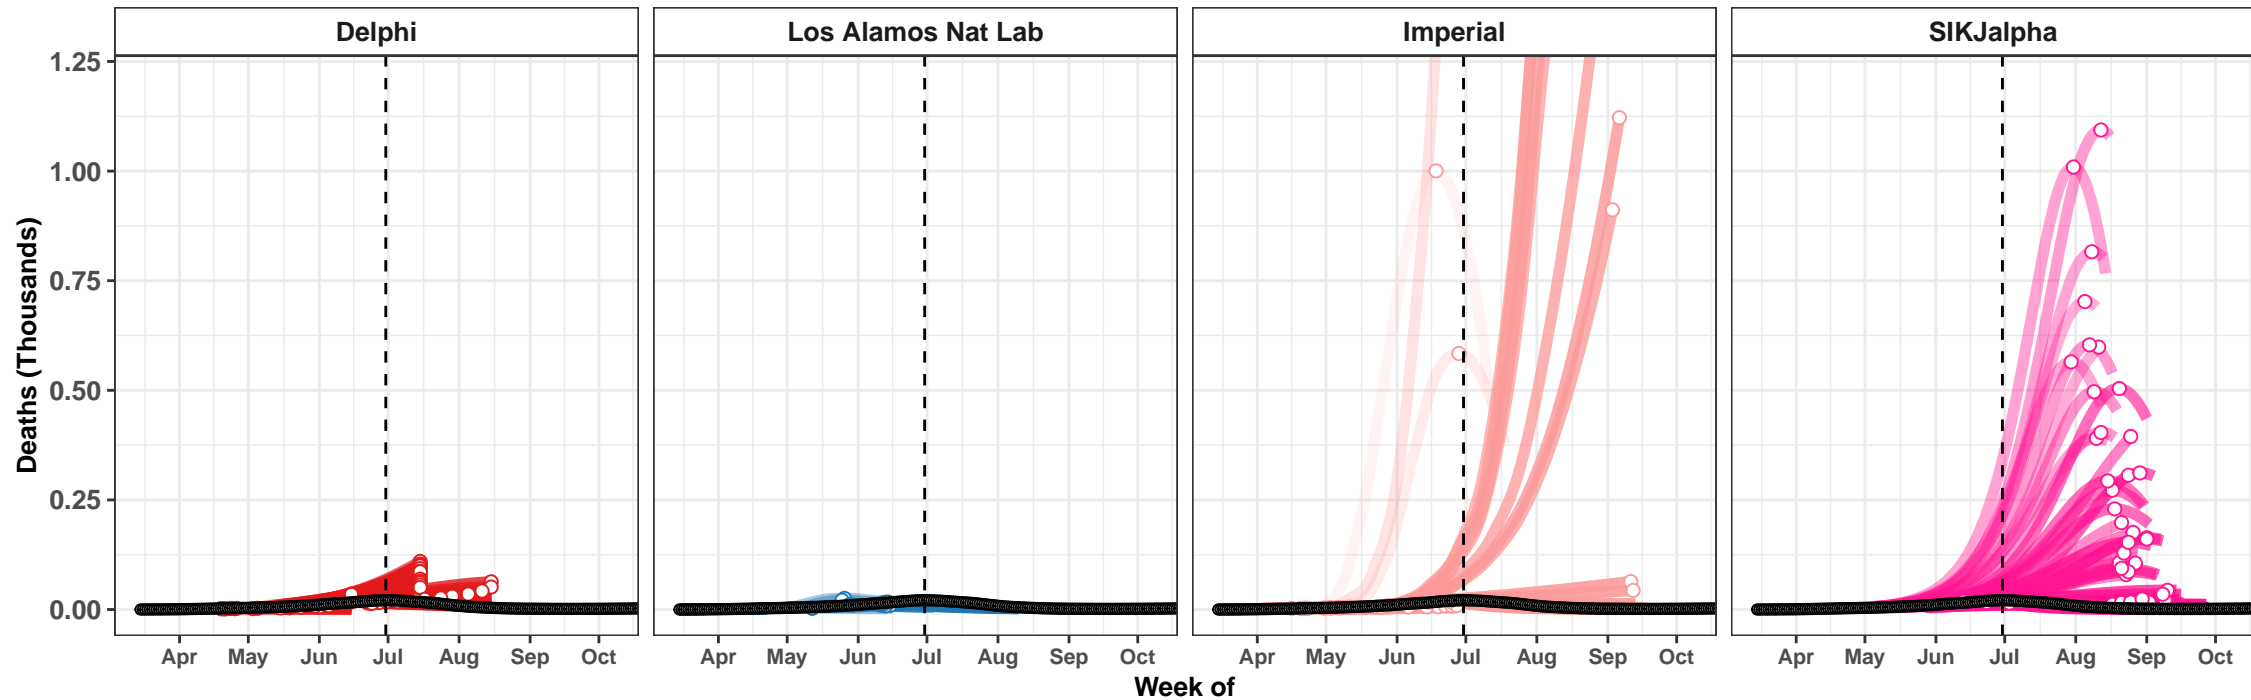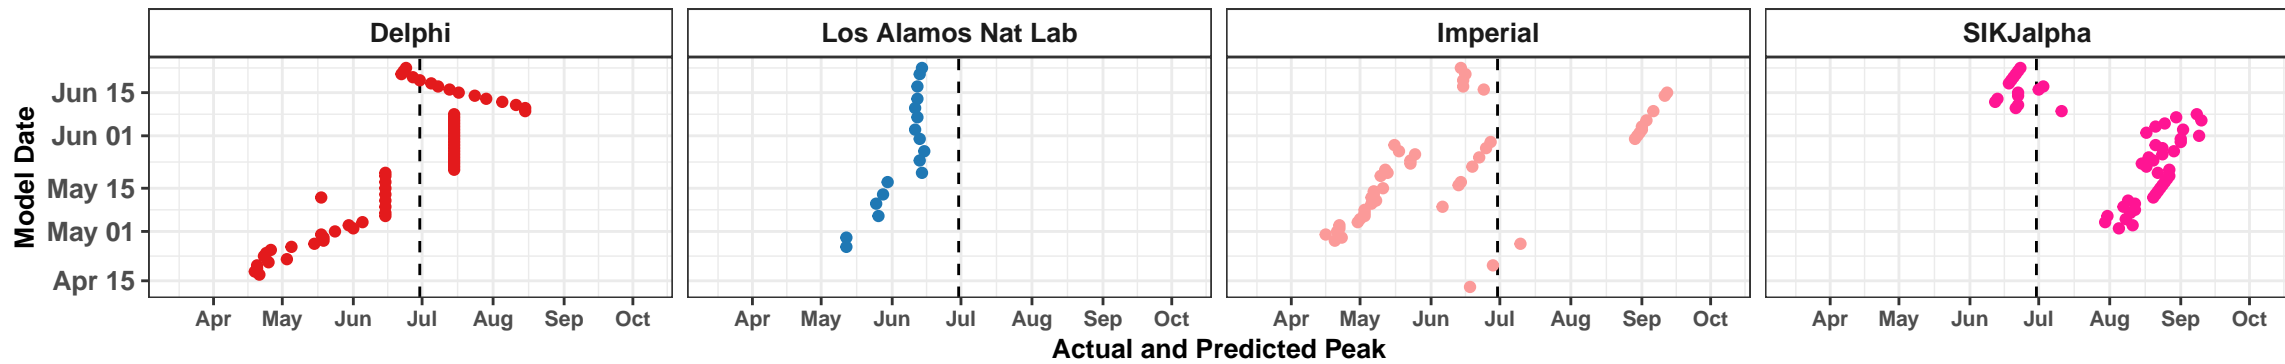

# Ethiopia – Smoothed Daily Deaths

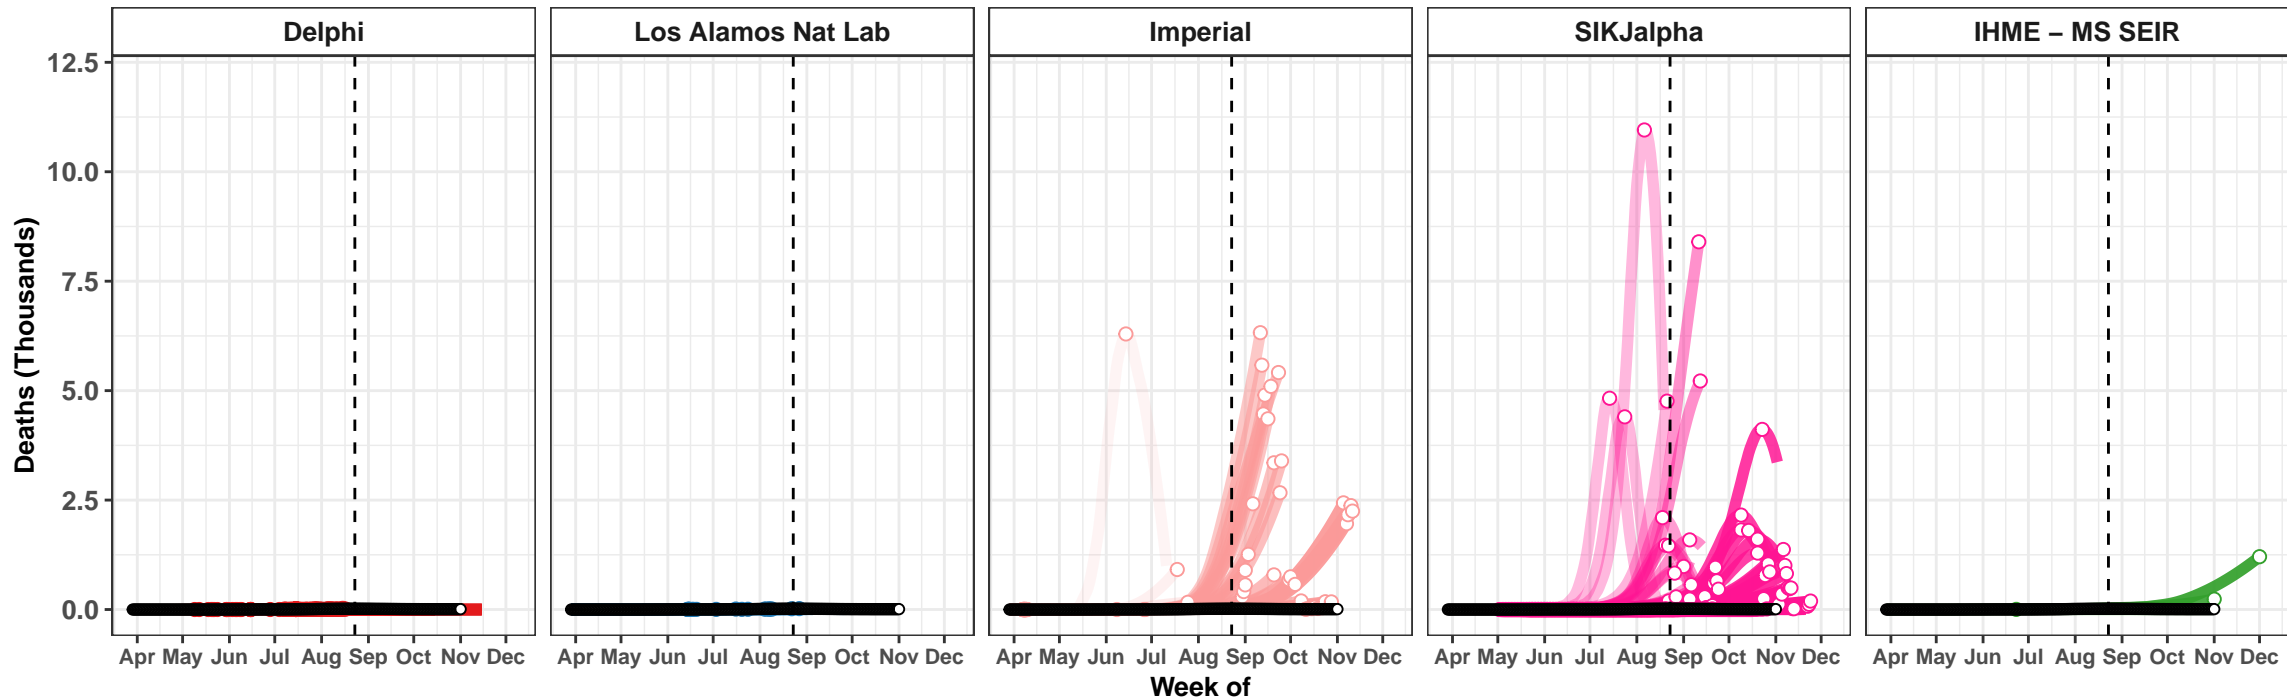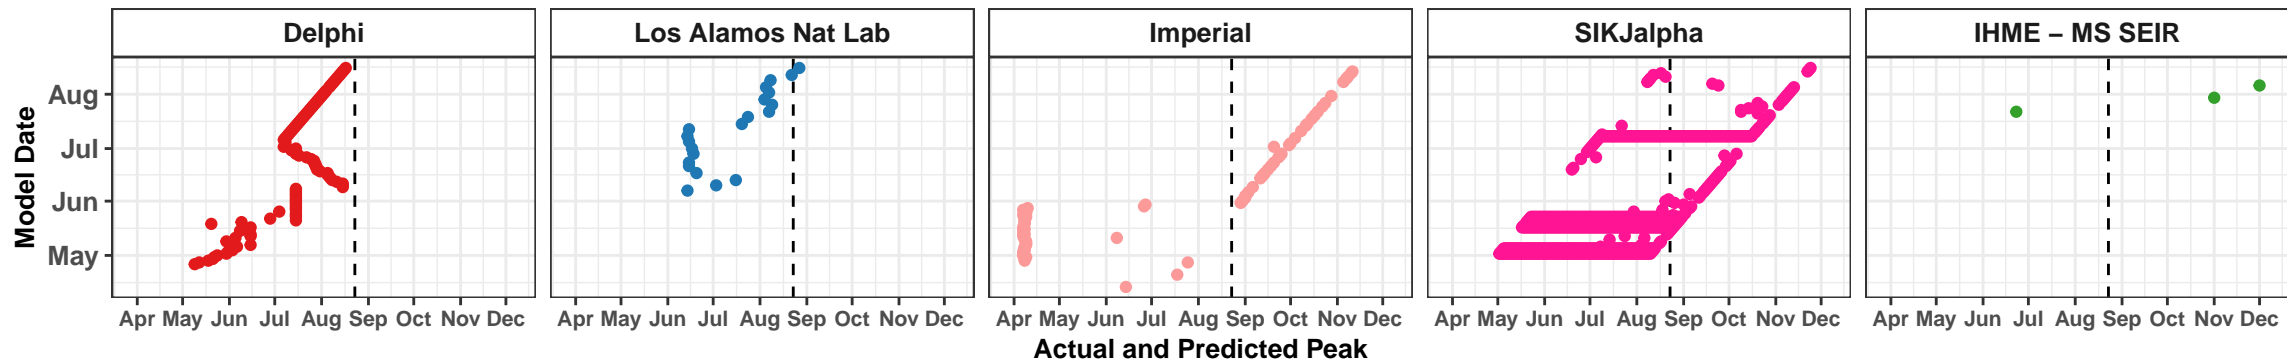

# Paraguay – Smoothed Daily Deaths

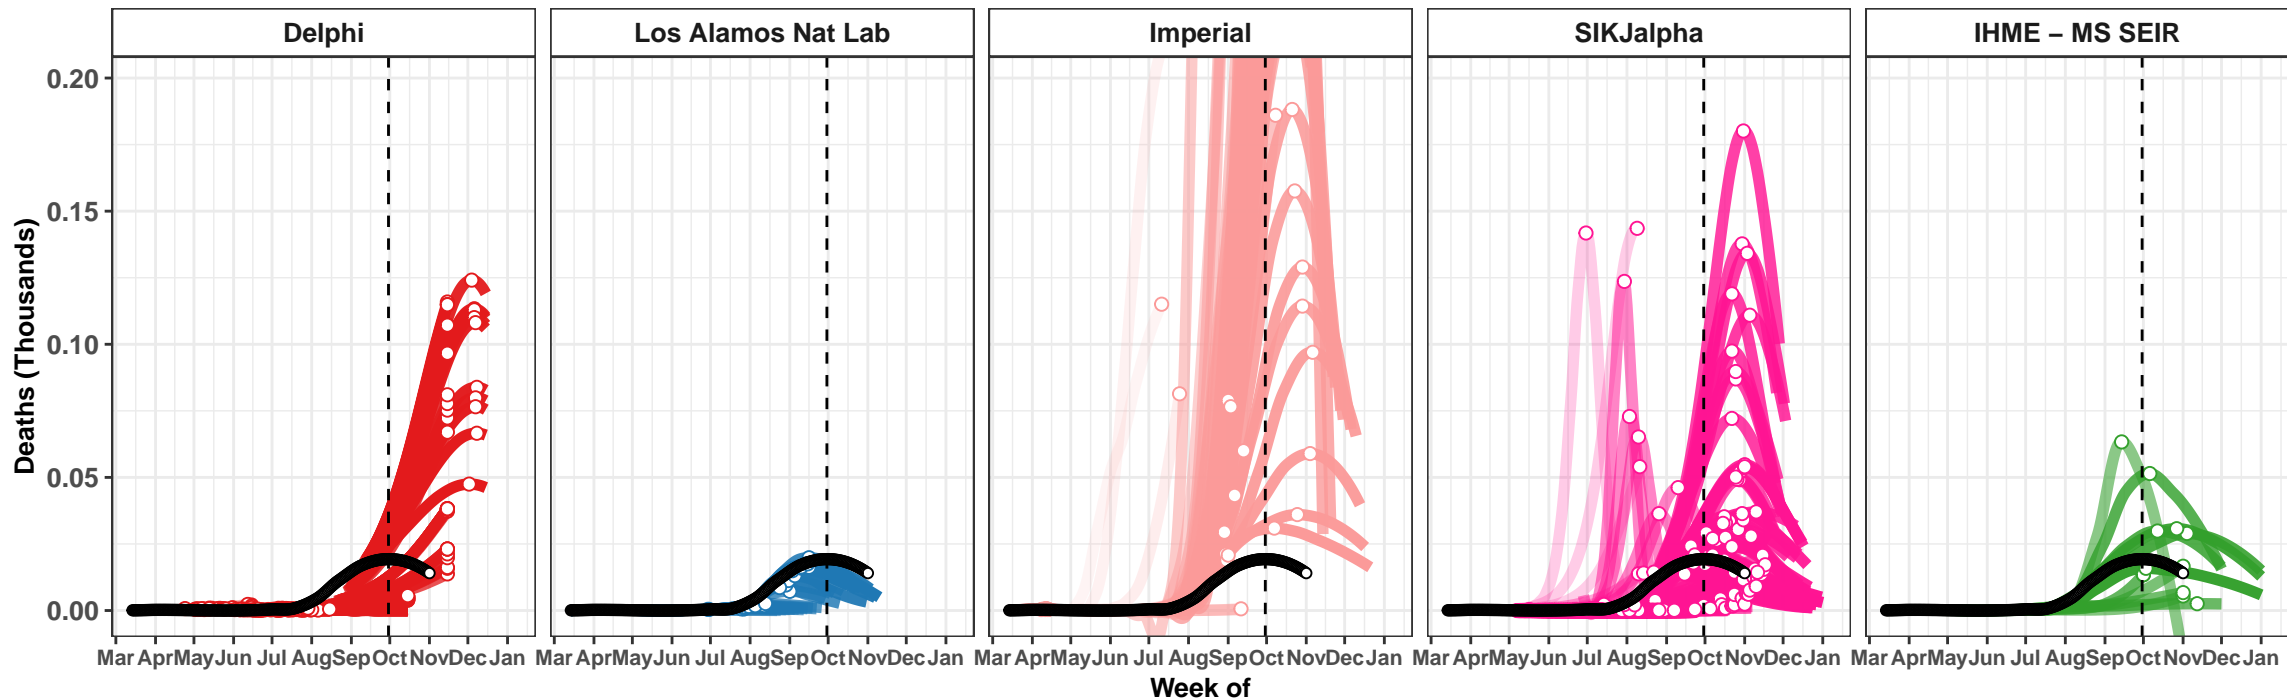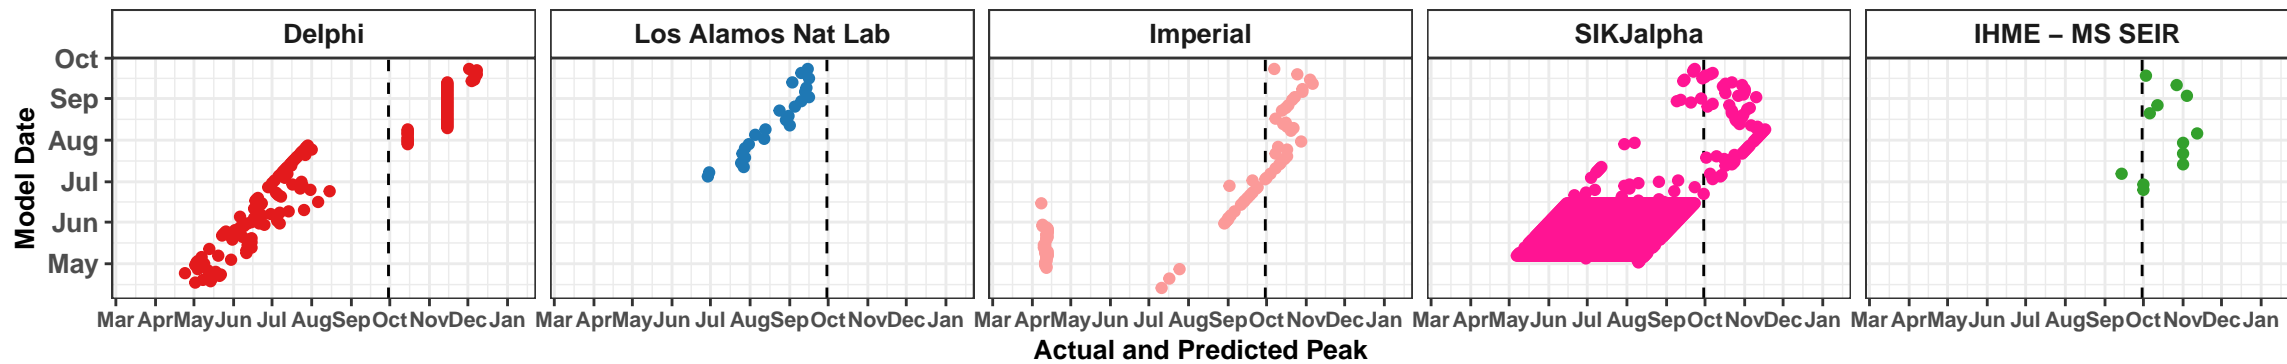

# Costa Rica – Smoothed Daily Deaths

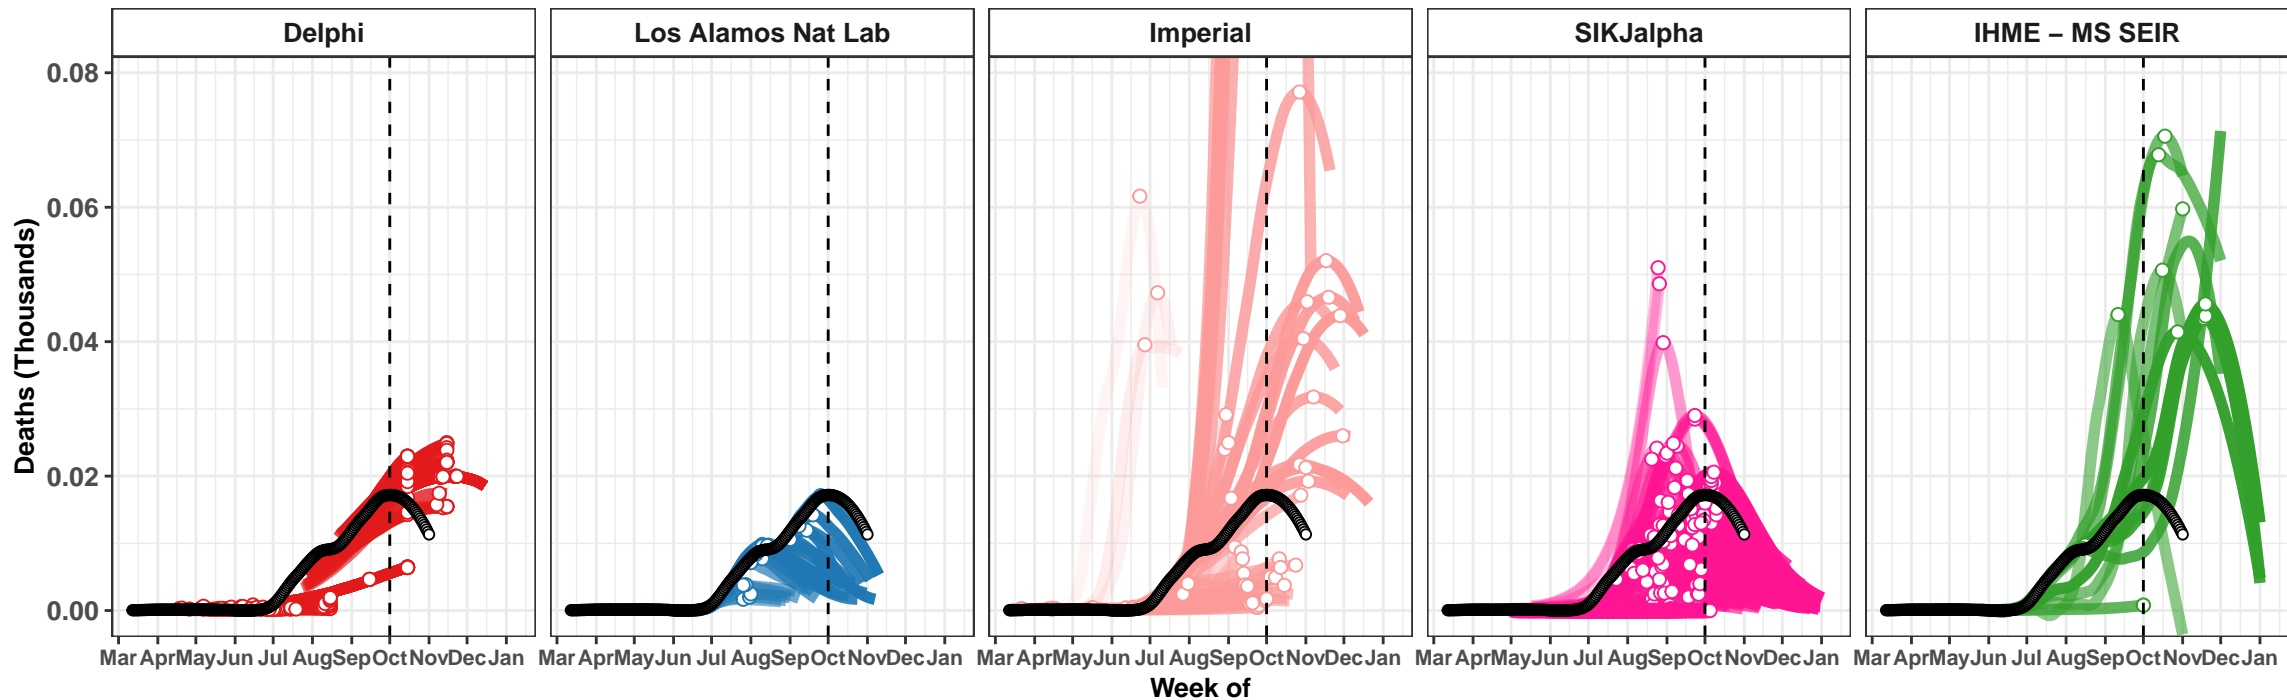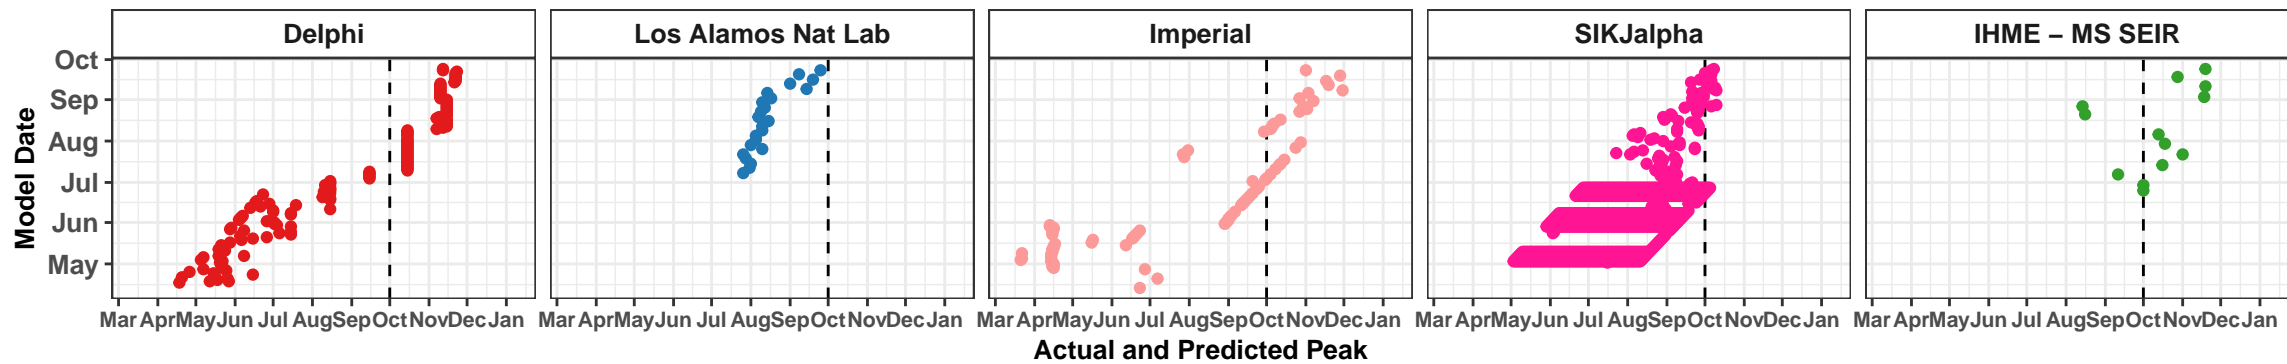

# Armenia – Smoothed Daily Deaths

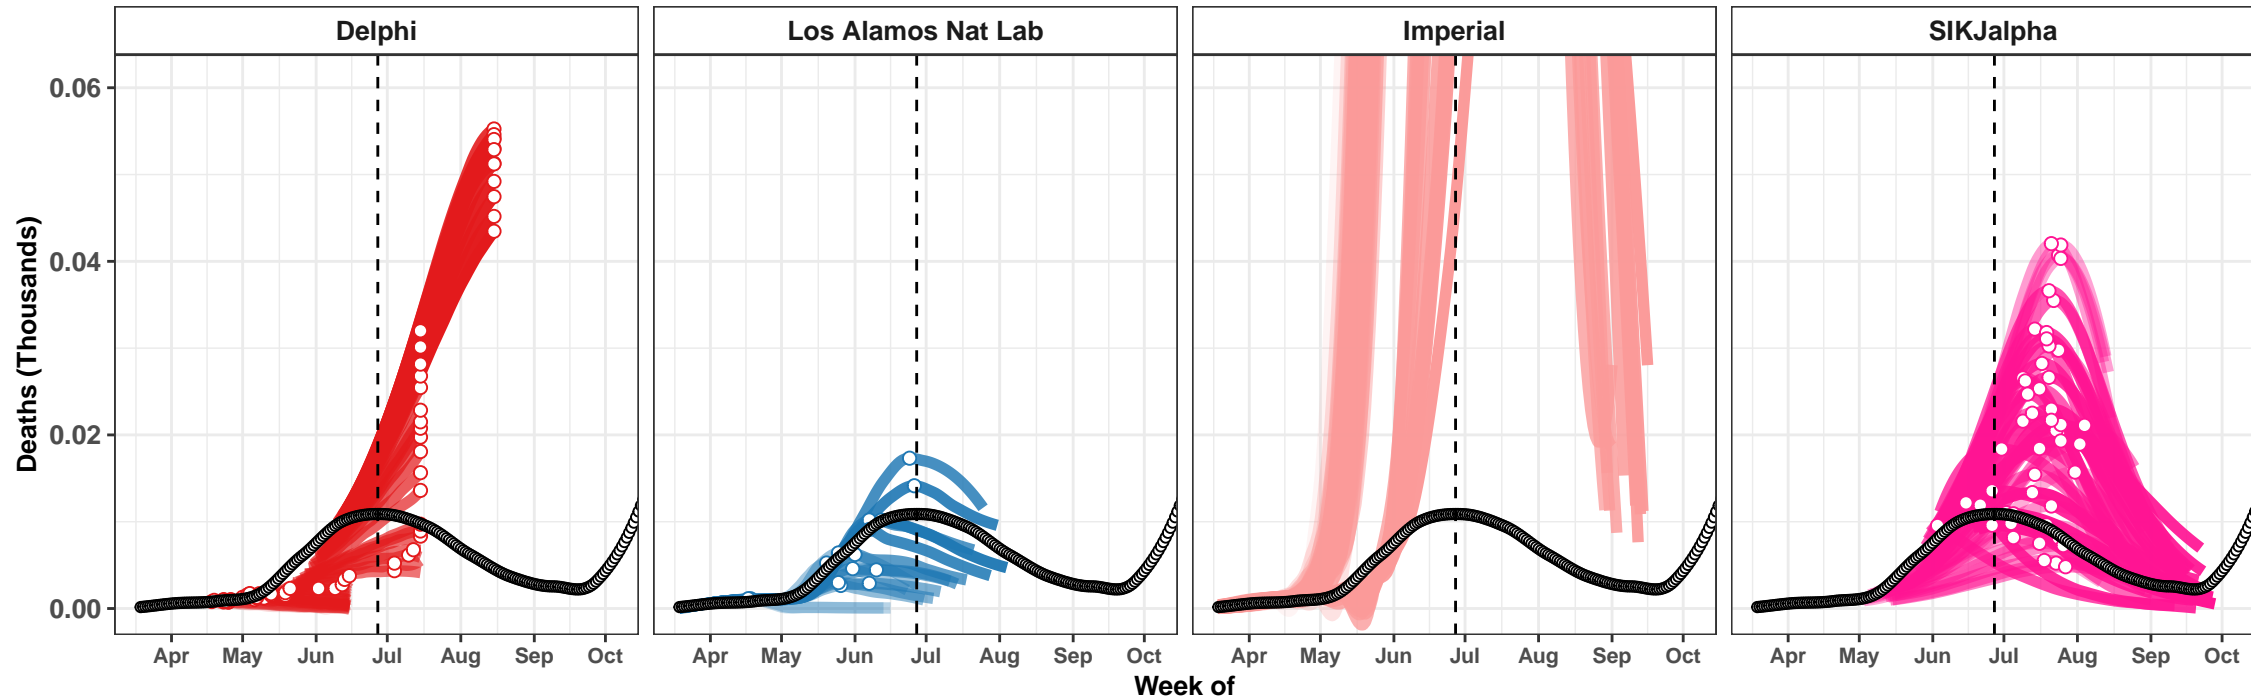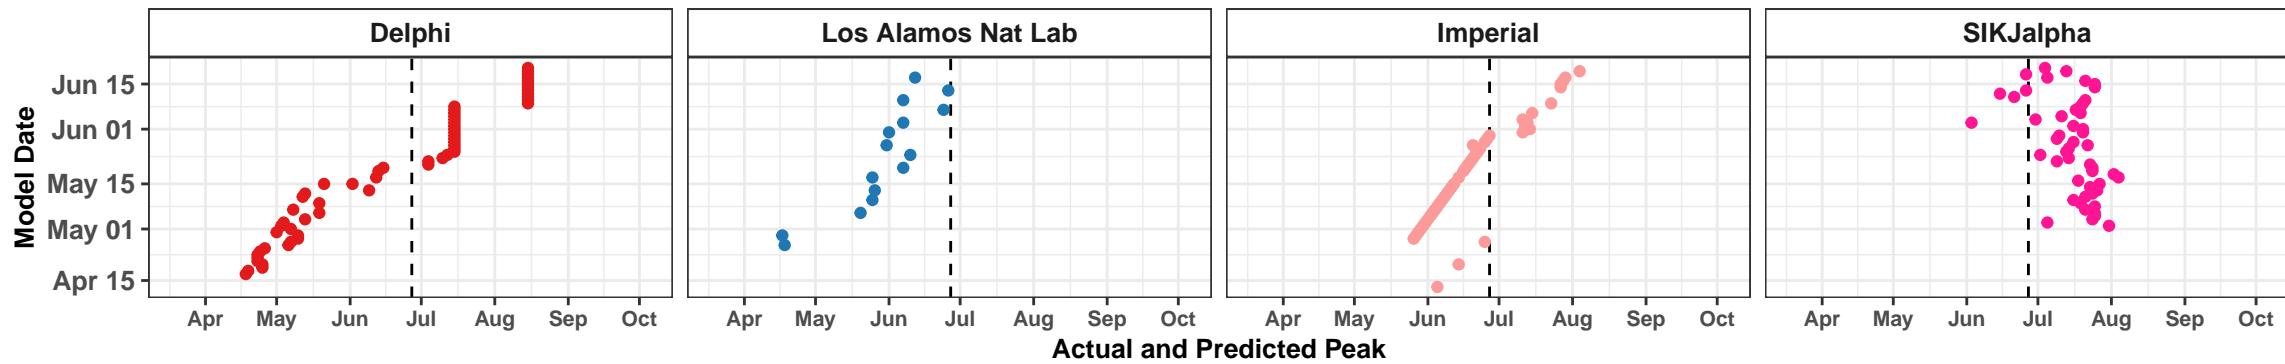

# Oklahoma – Smoothed Daily Deaths

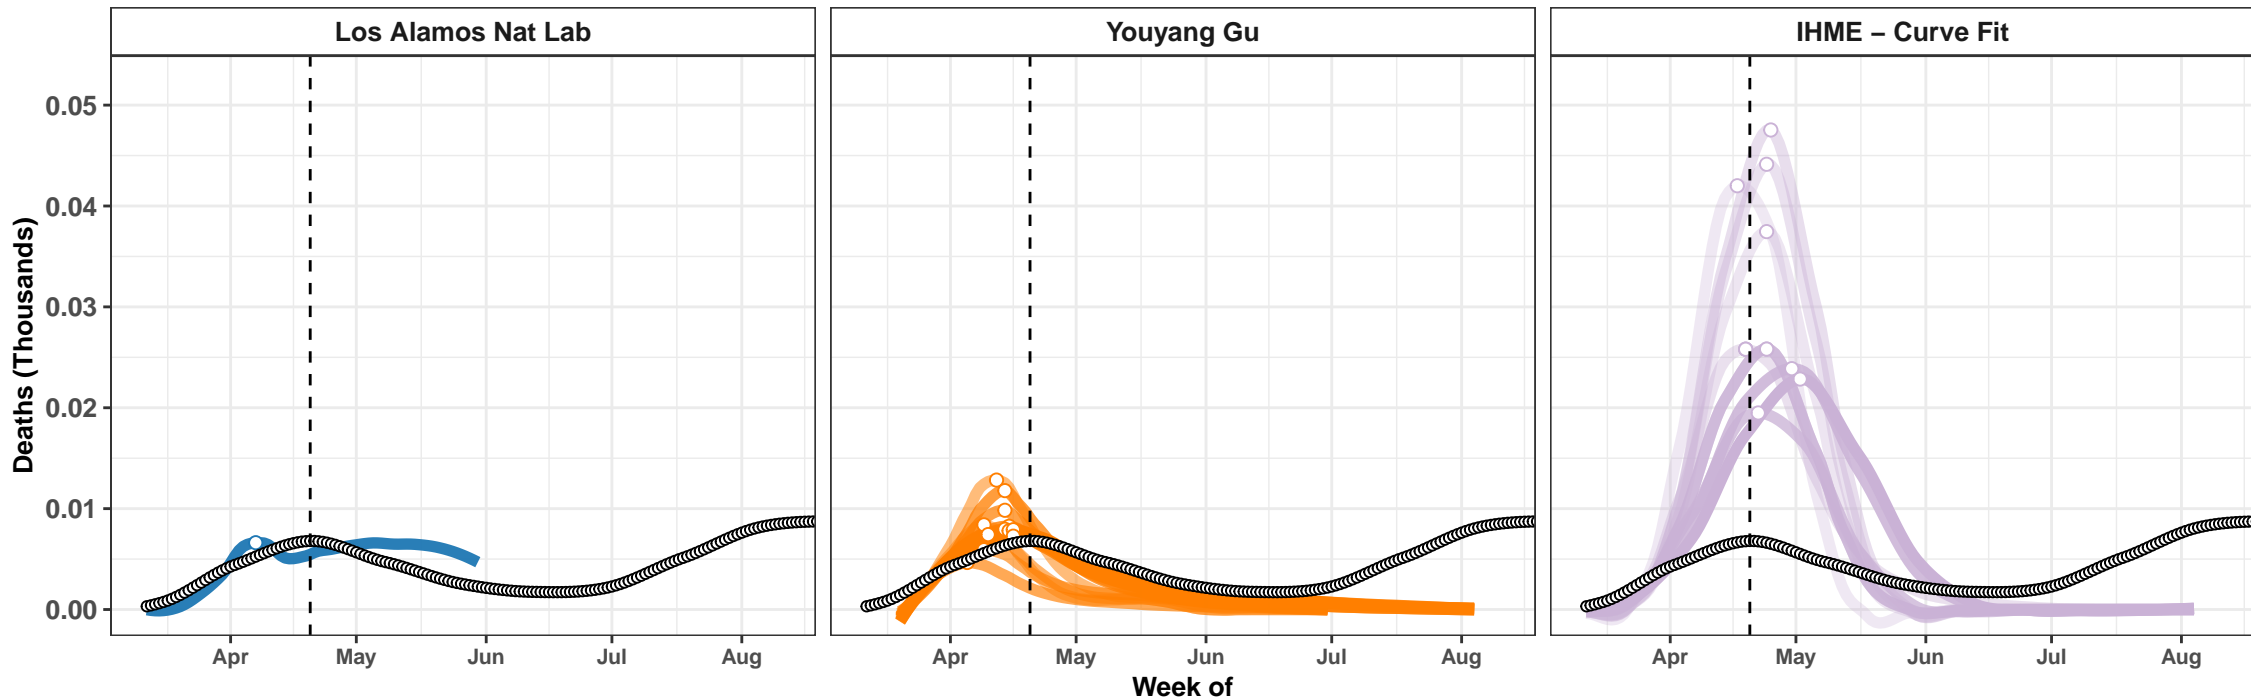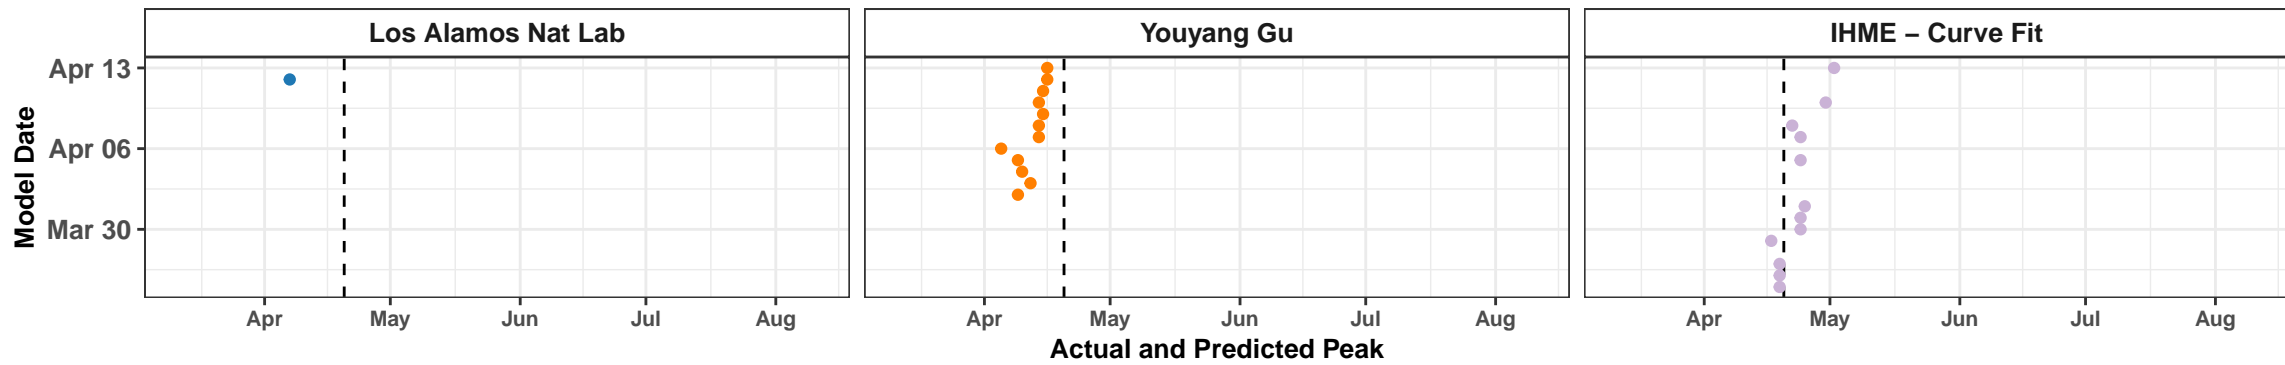

# Bulgaria – Smoothed Daily Deaths

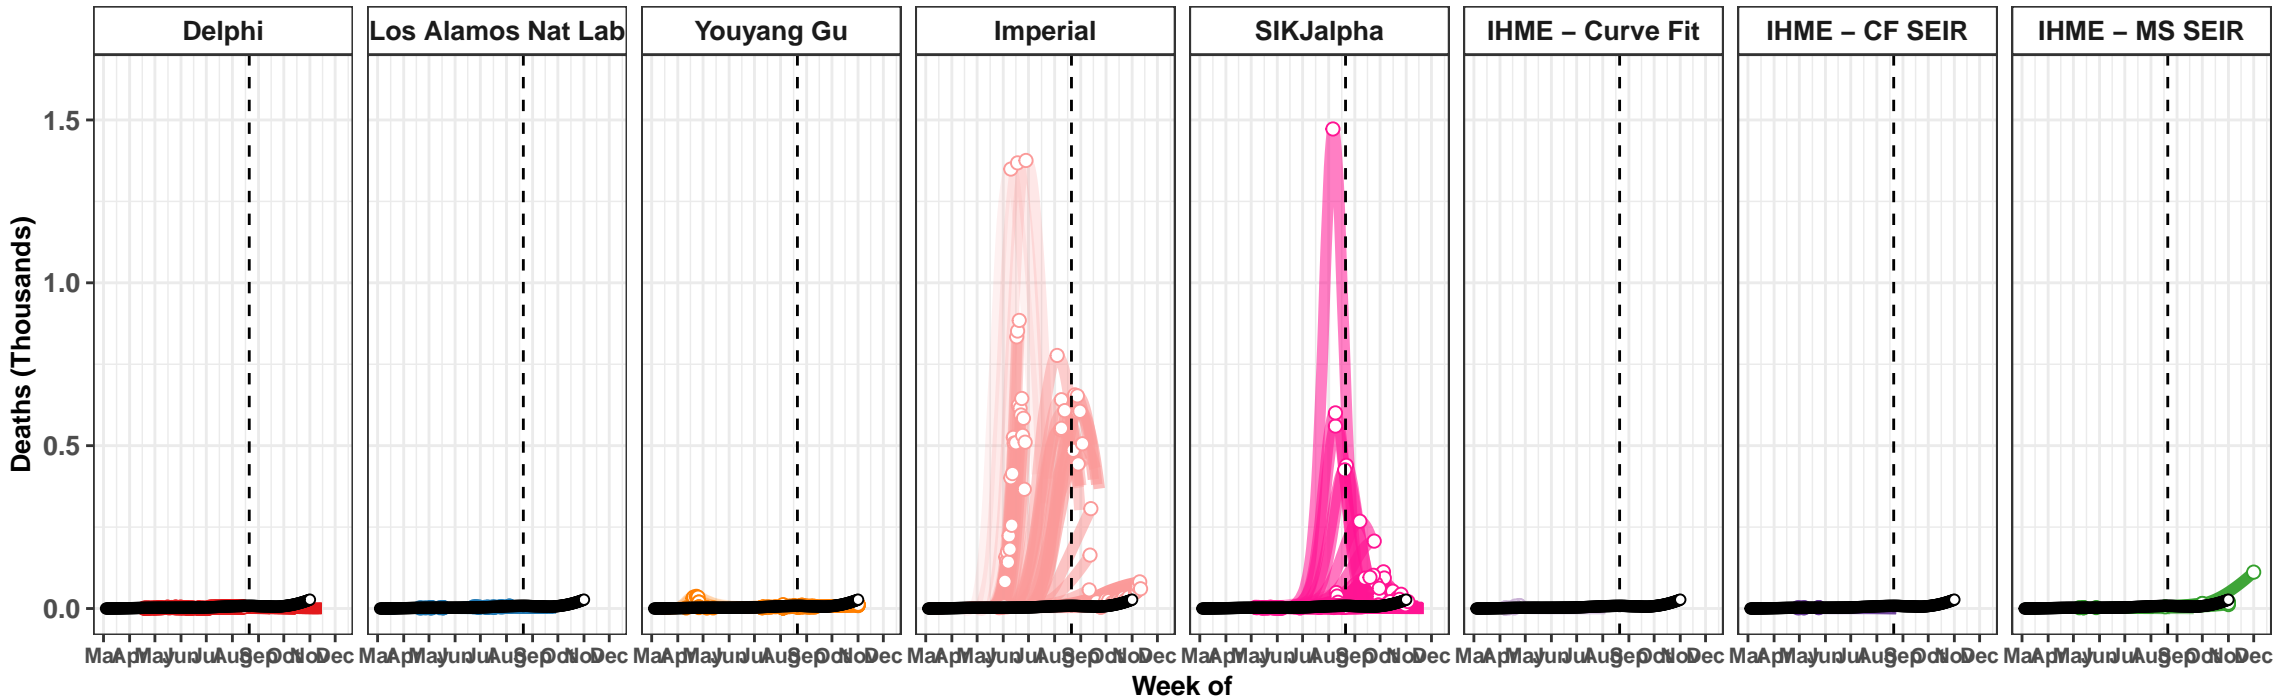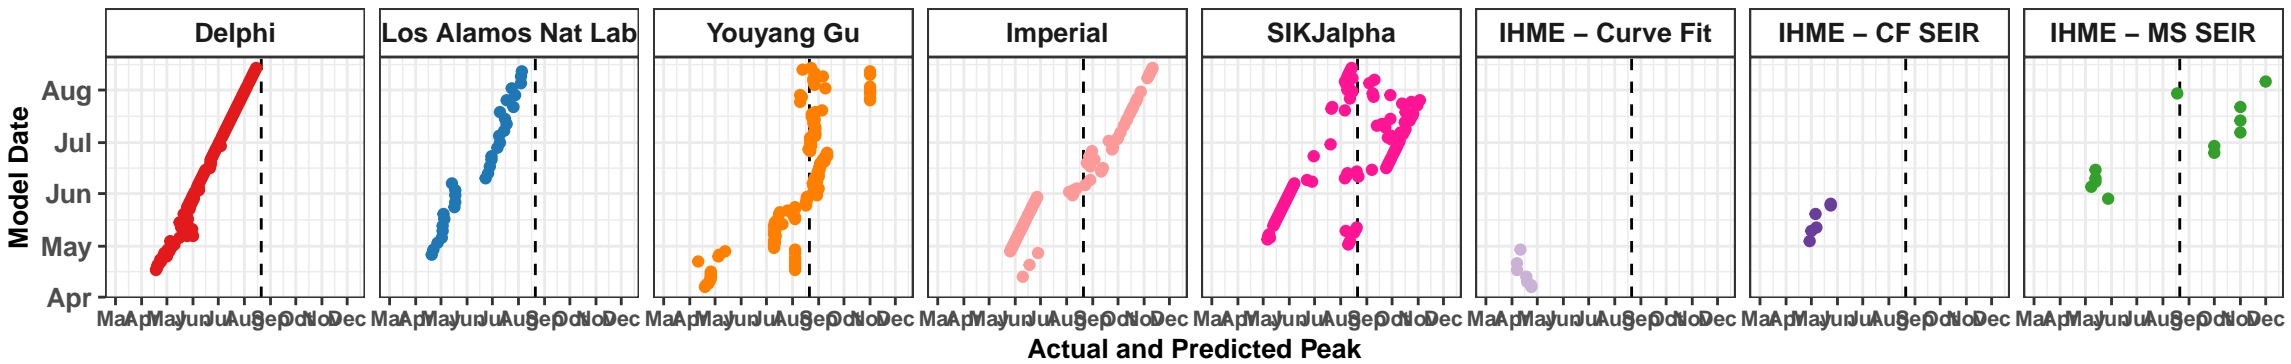



# Myanmar – Smoothed Daily Deaths

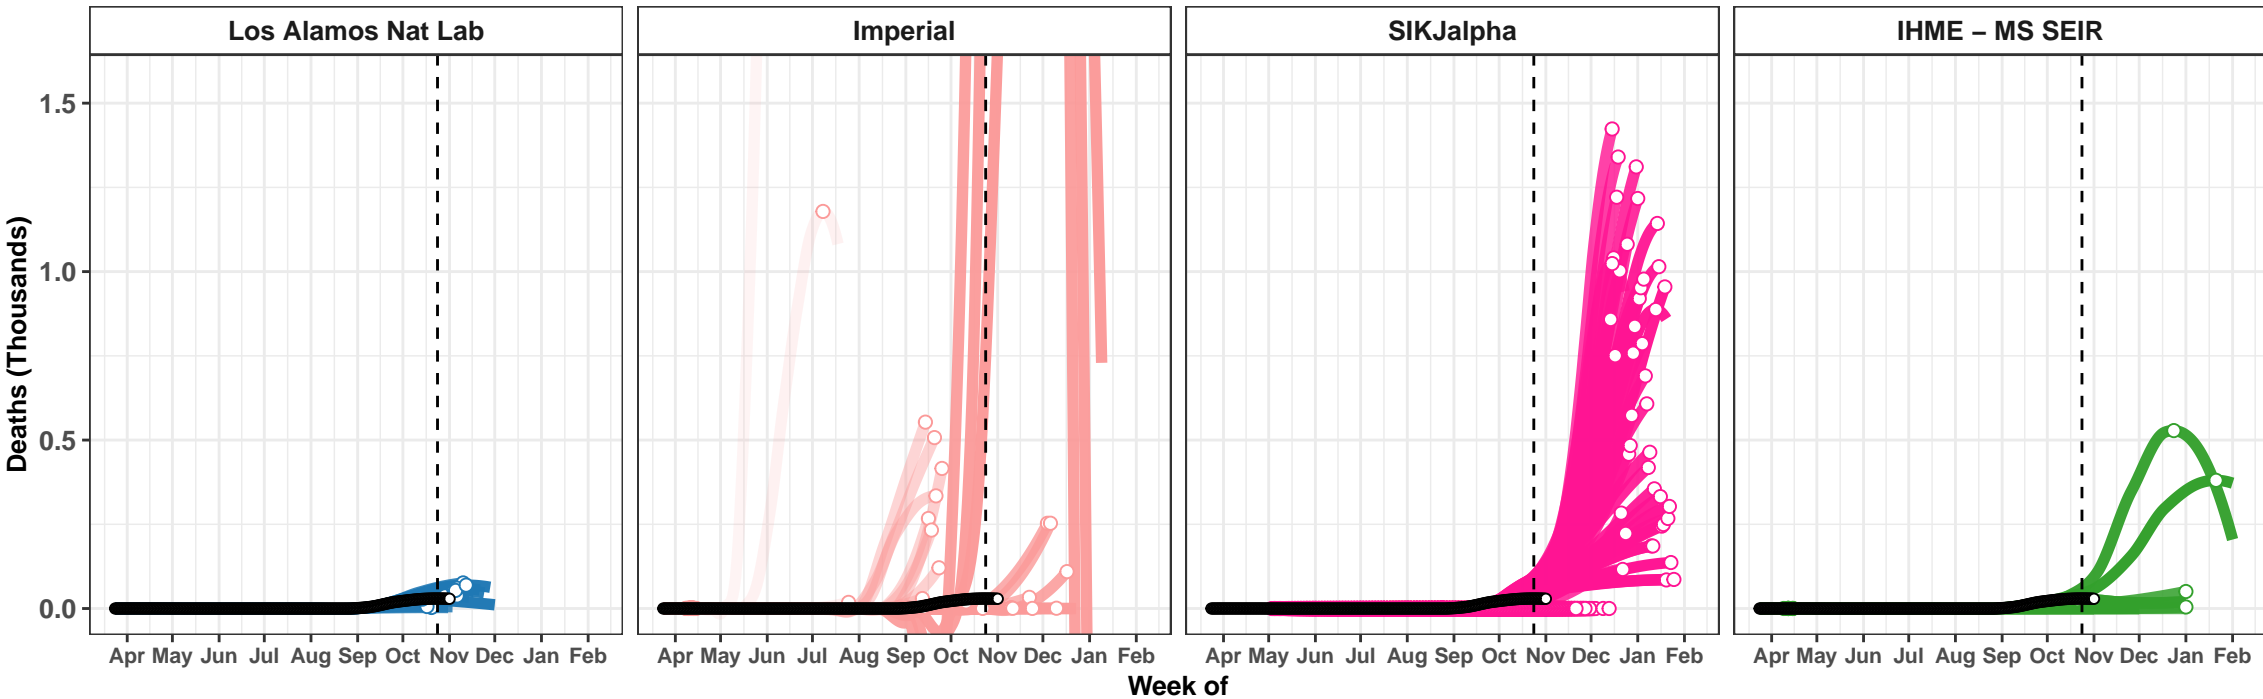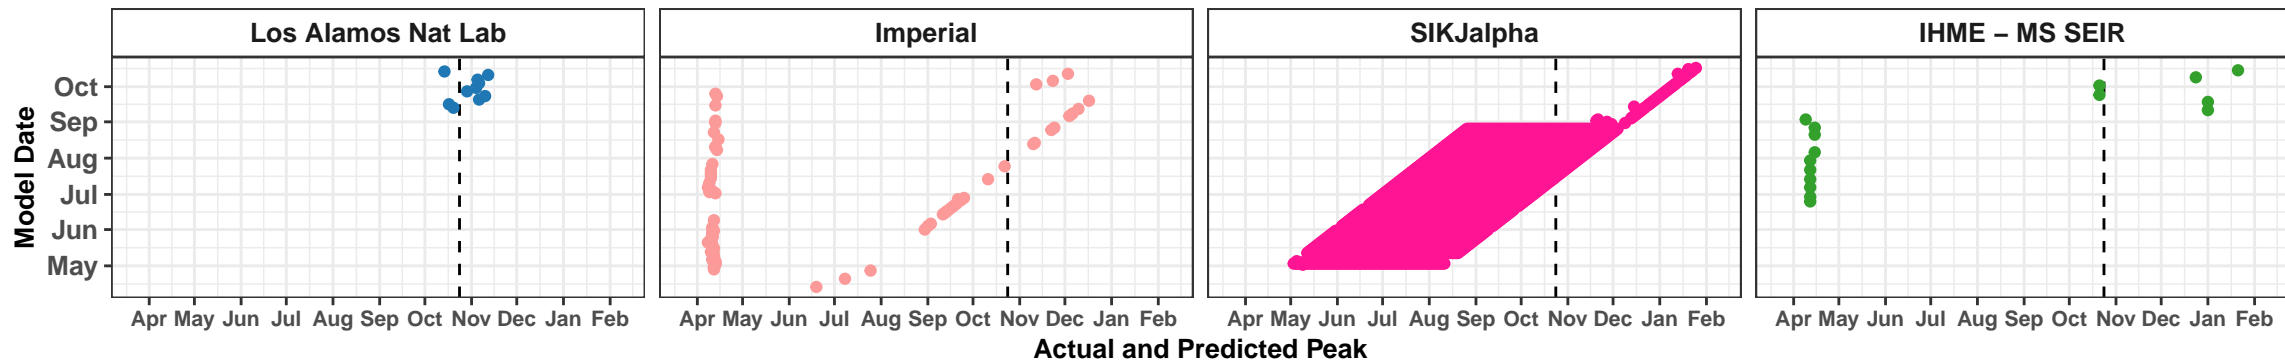

# Bosnia and Herzegovina – Smoothed Daily Deaths

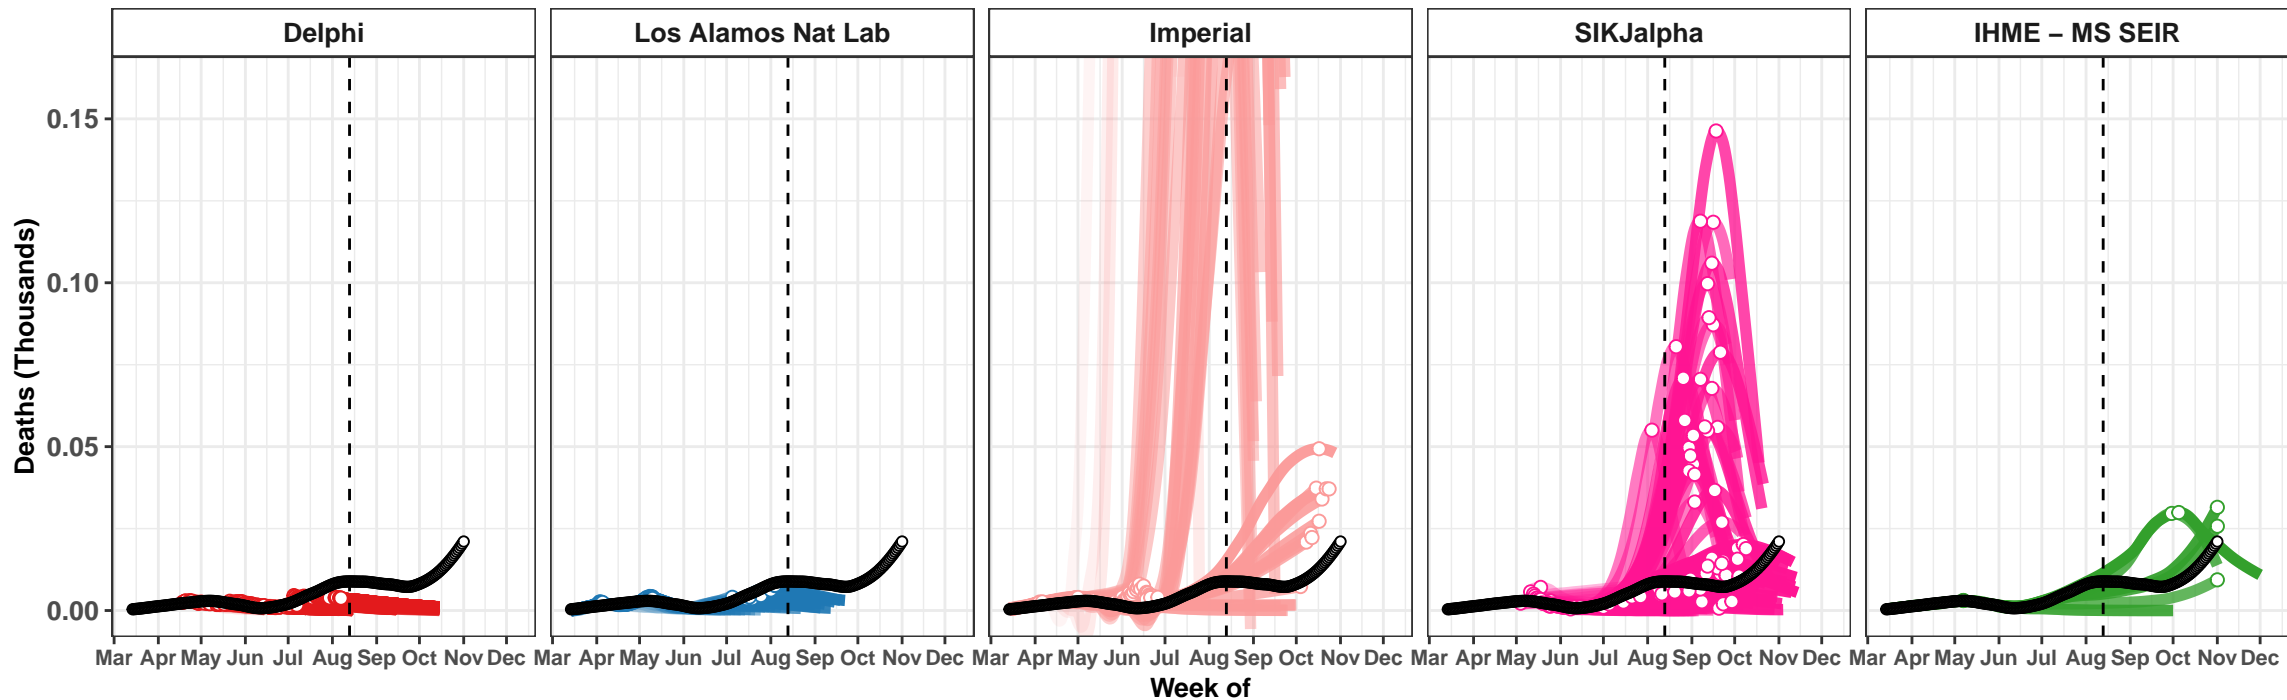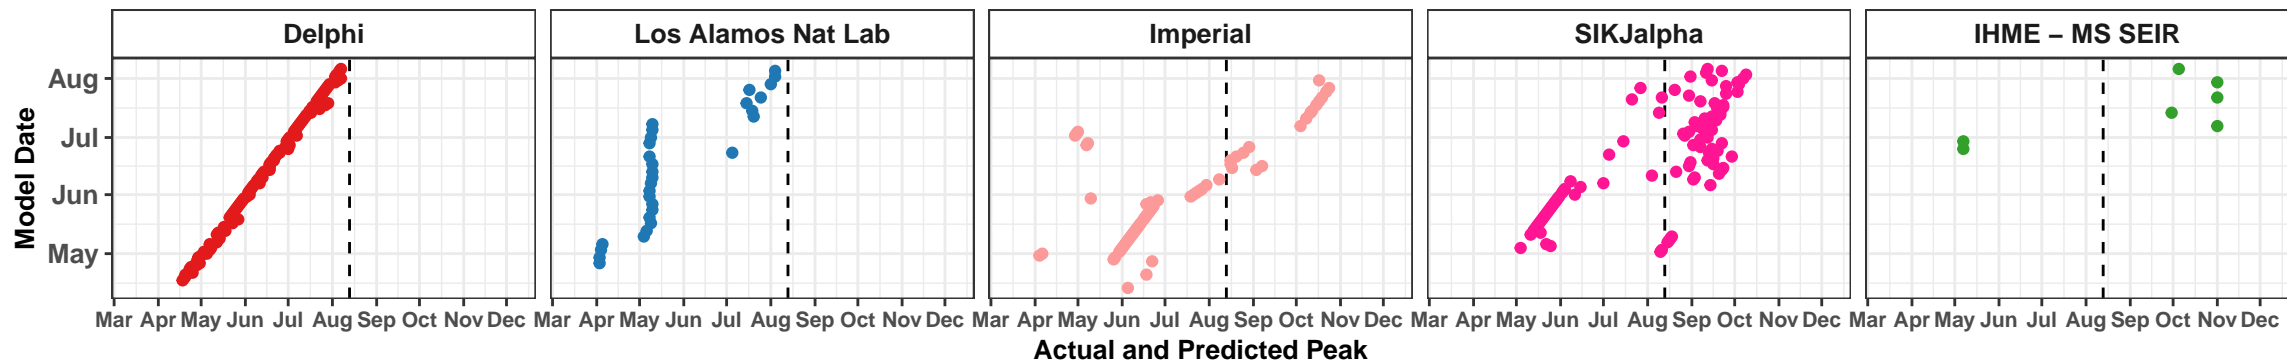

# Oman – Smoothed Daily Deaths

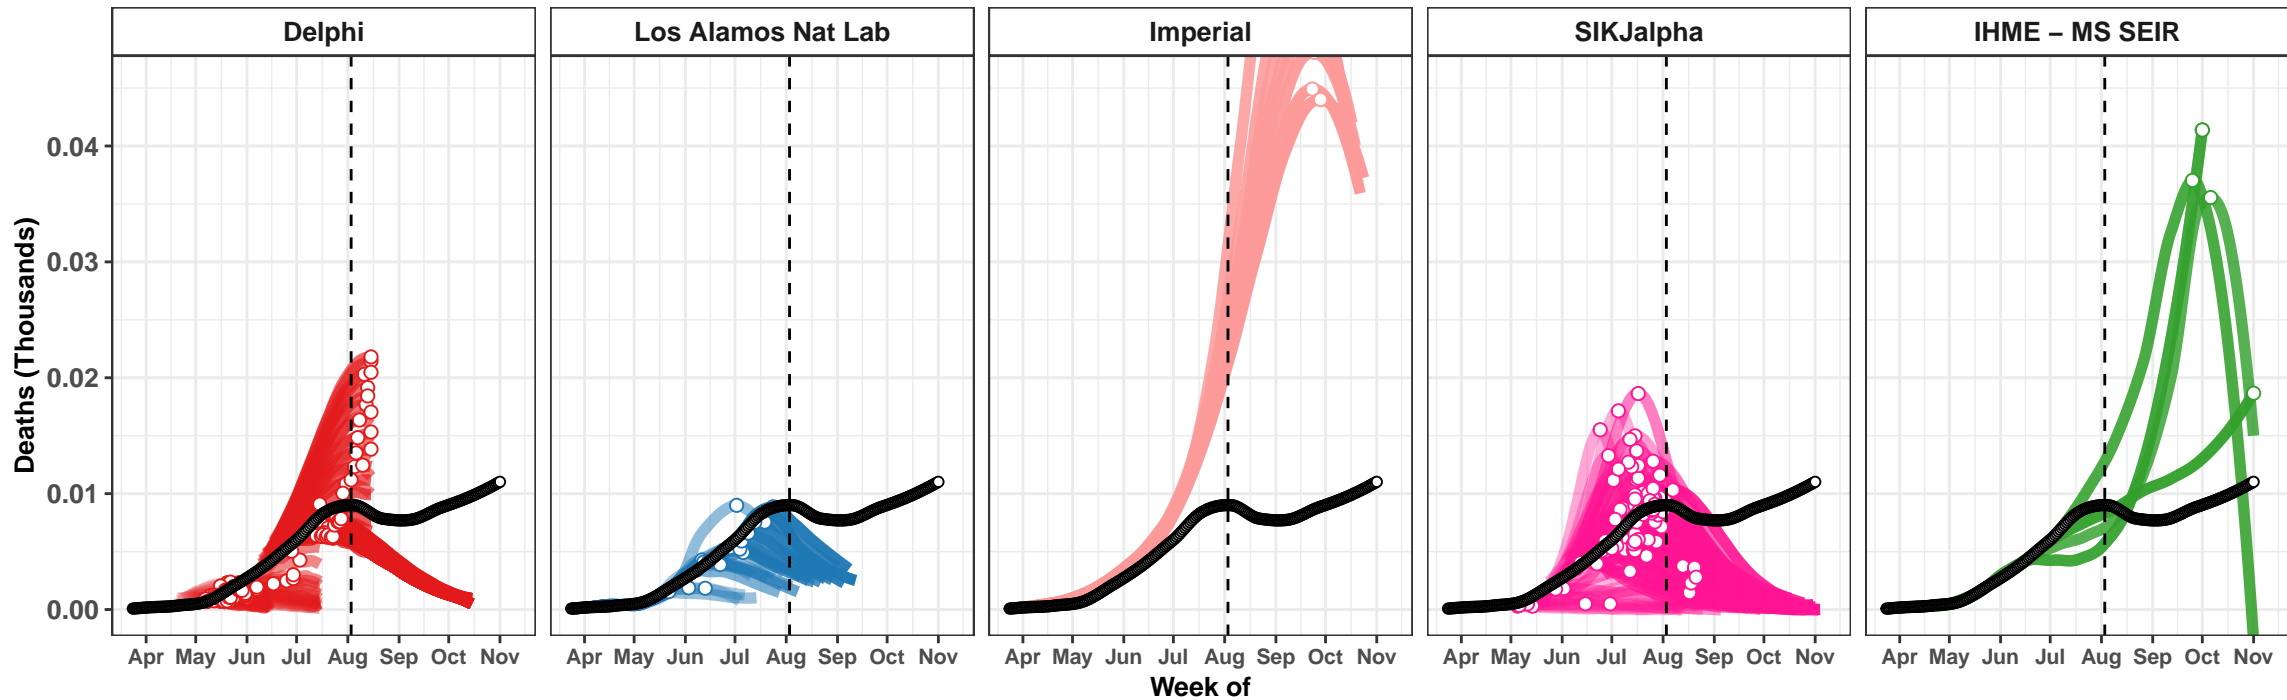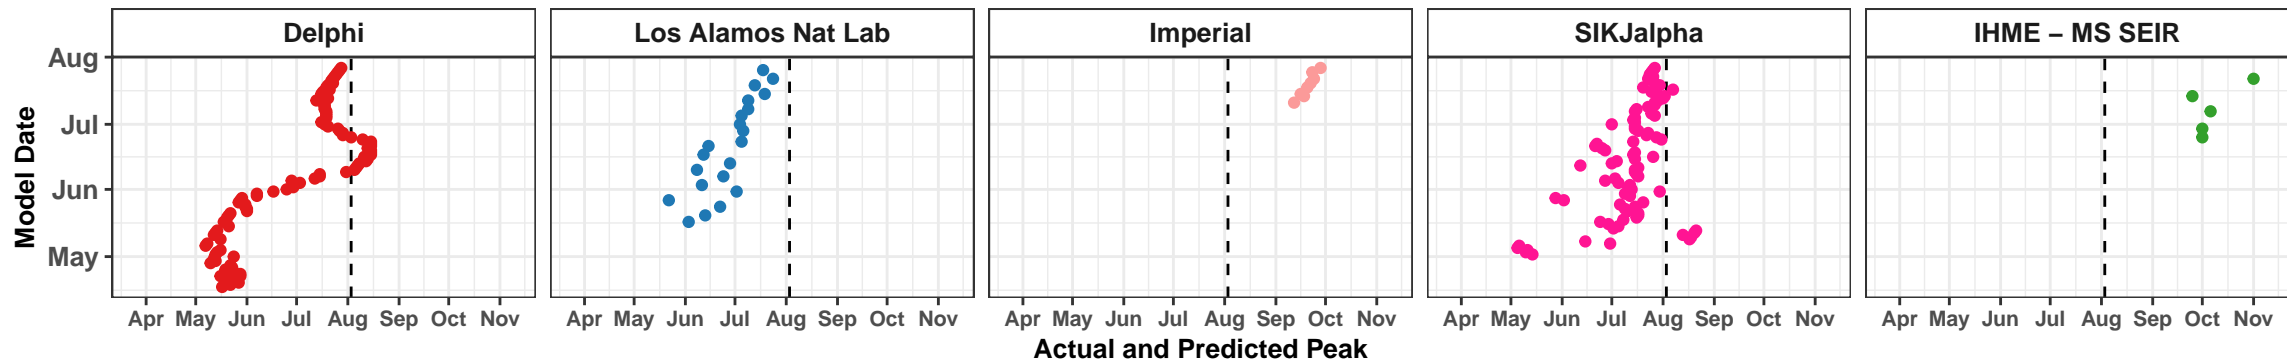

# Rhode Island – Smoothed Daily Deaths

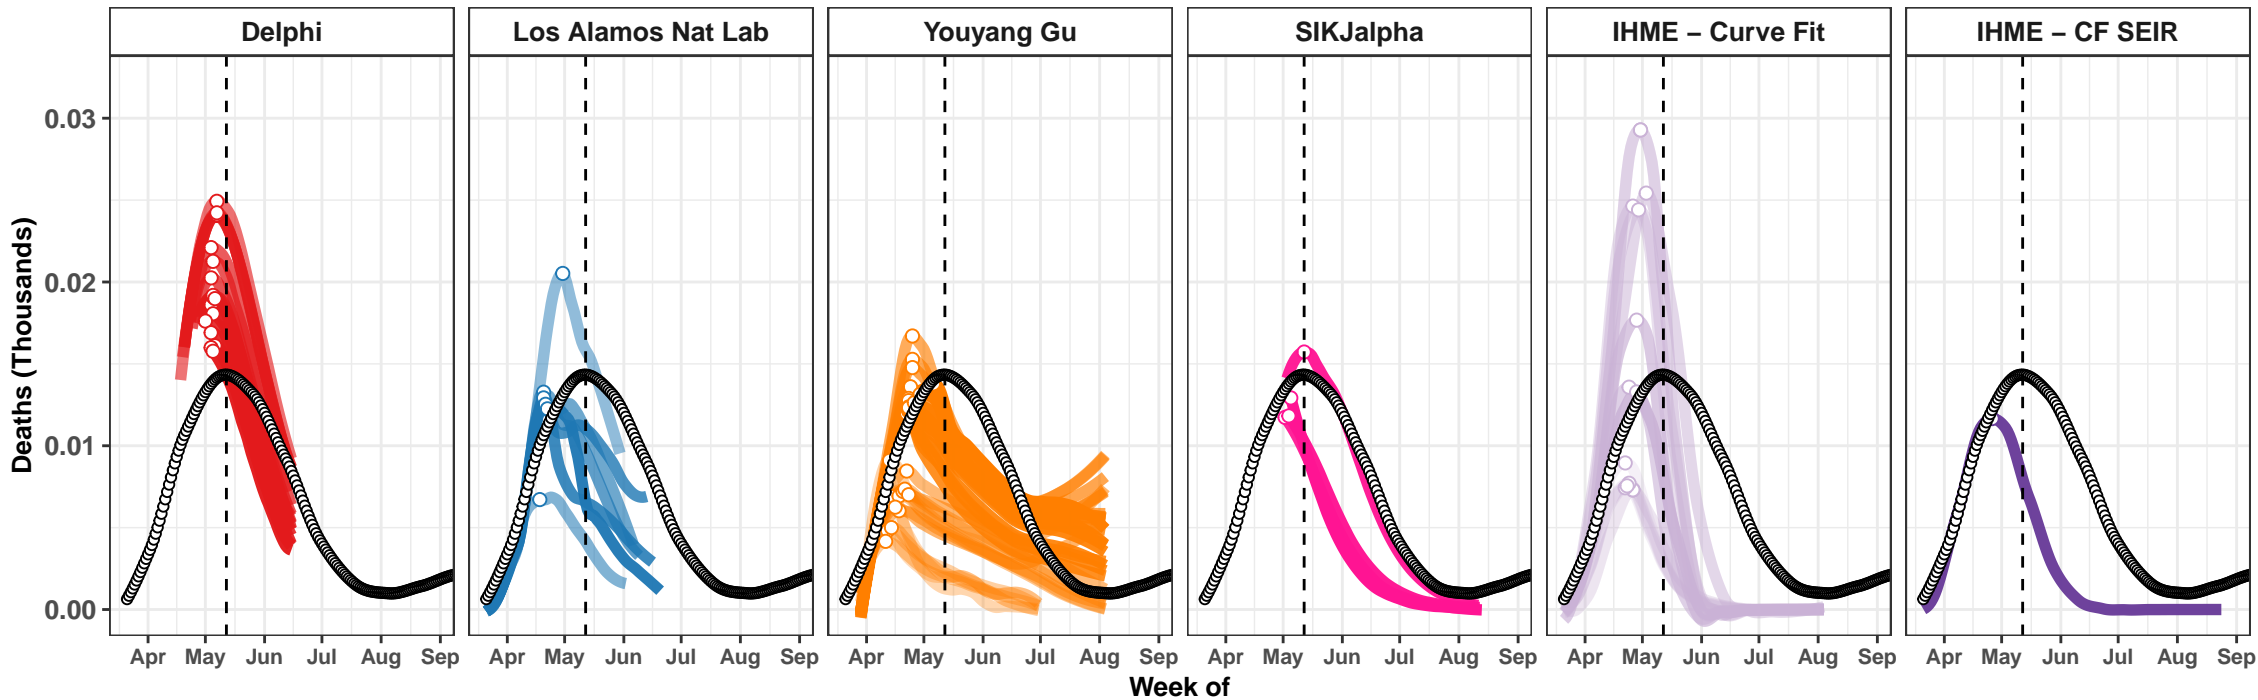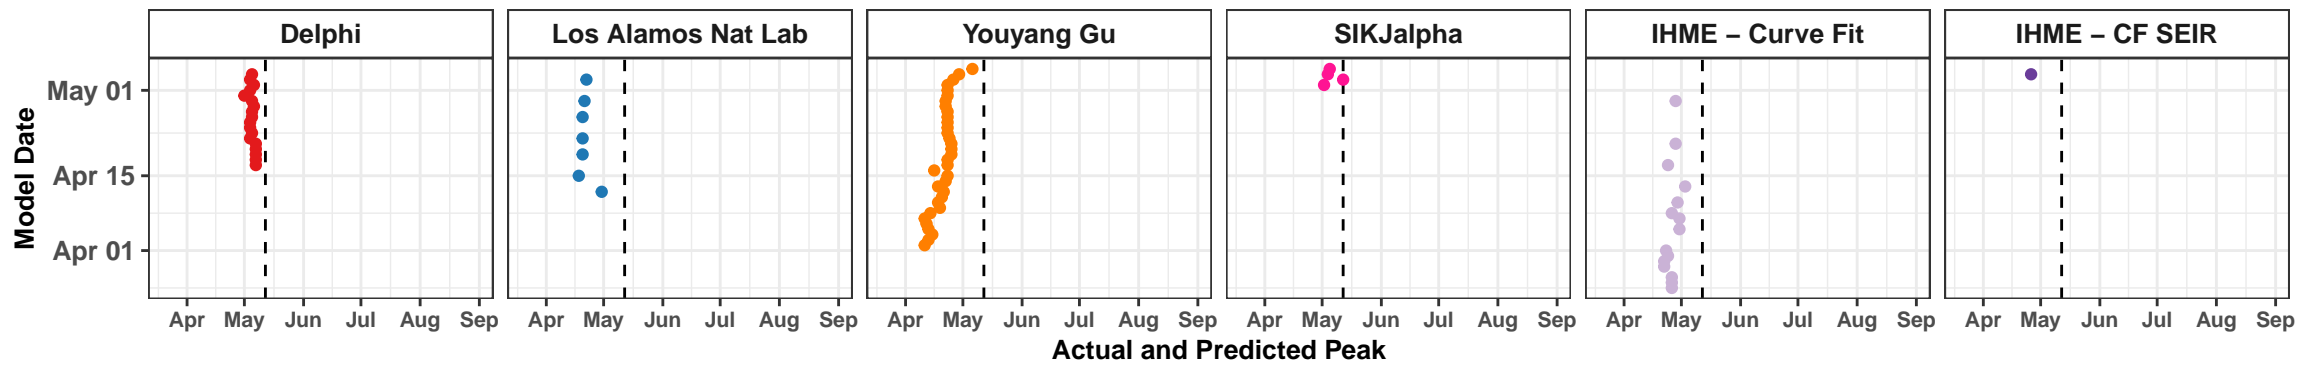

# Nigeria – Smoothed Daily Deaths

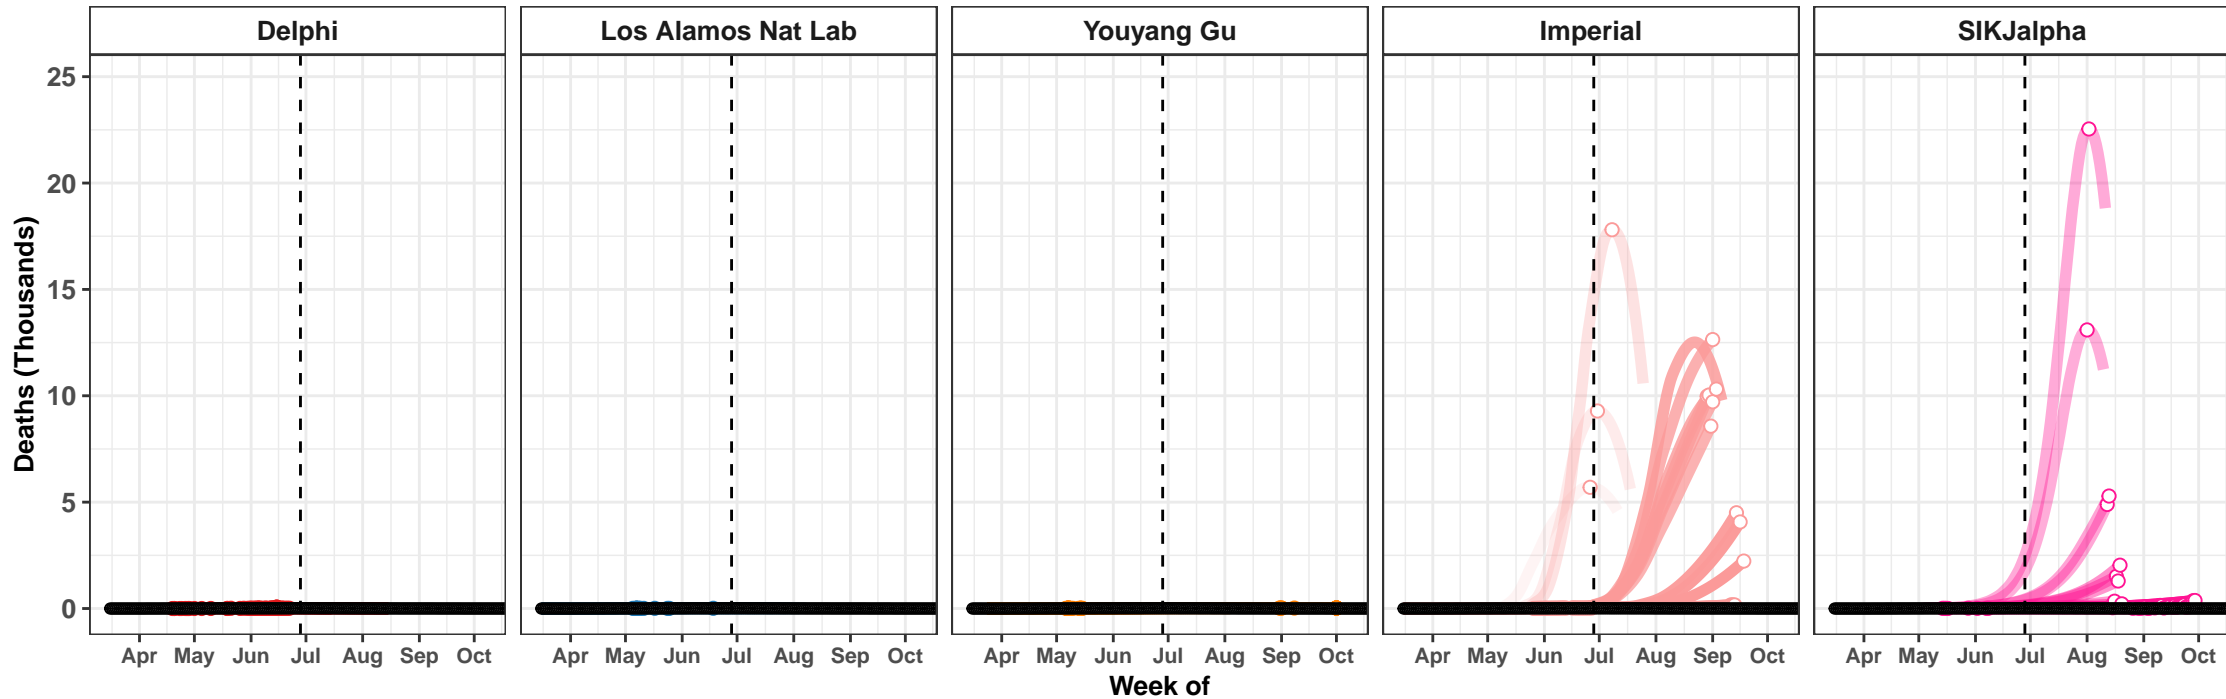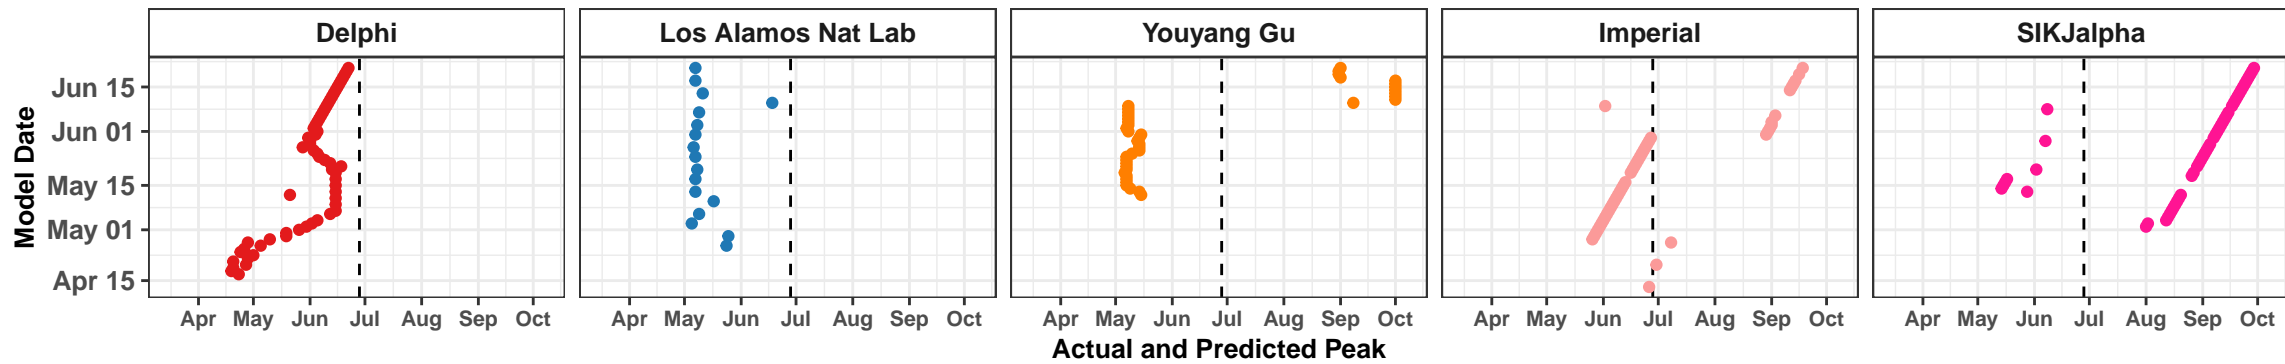

# Kyrgyzstan – Smoothed Daily Deaths

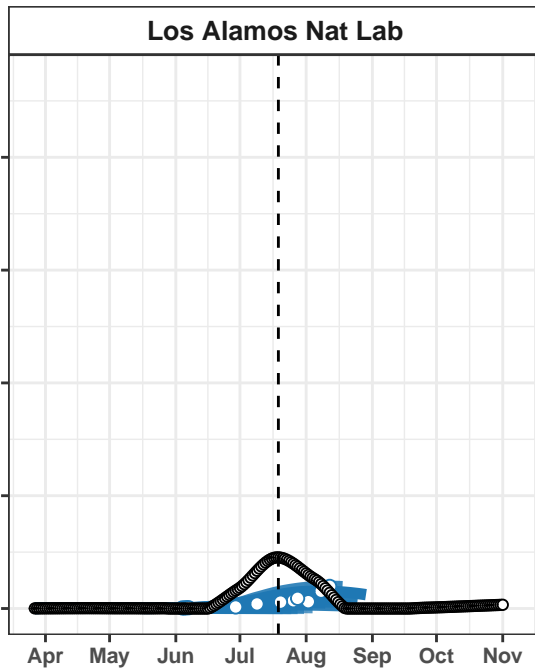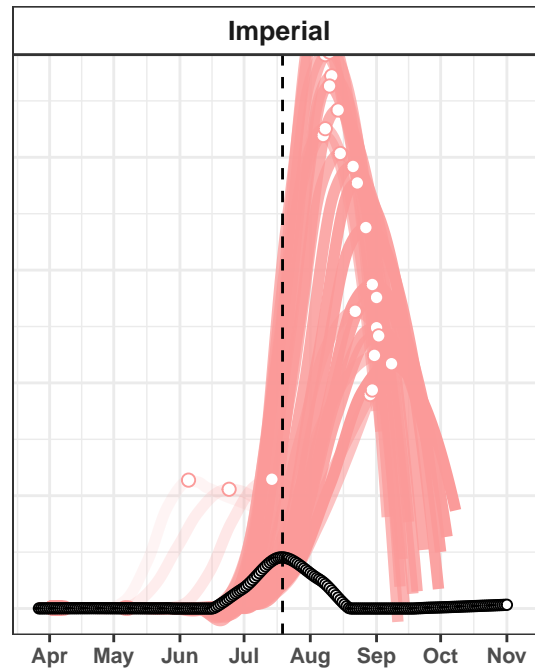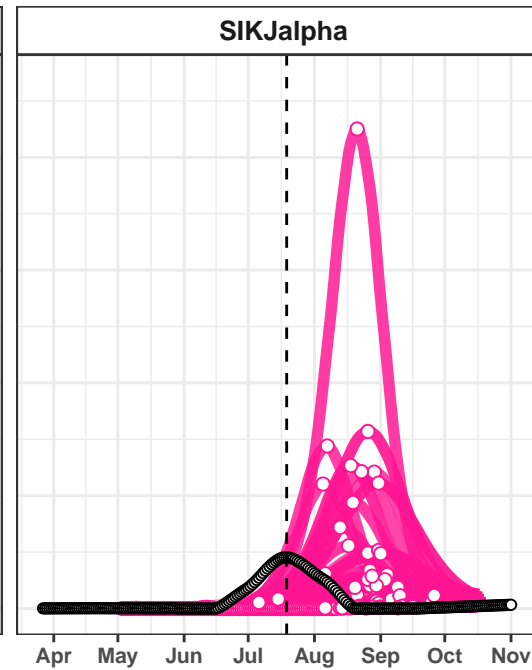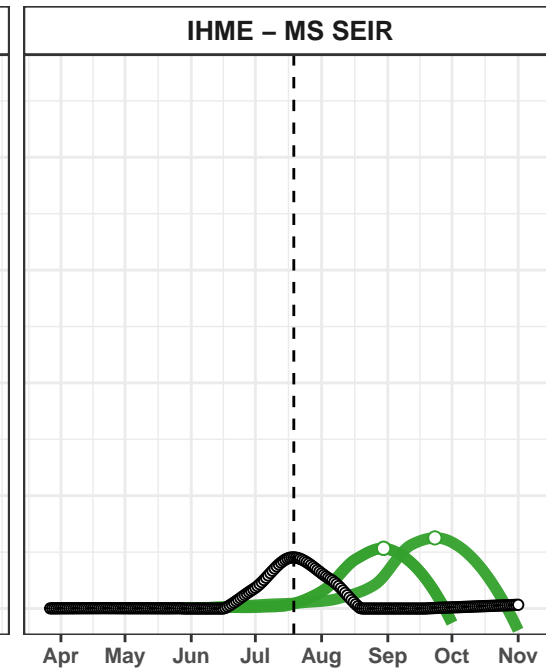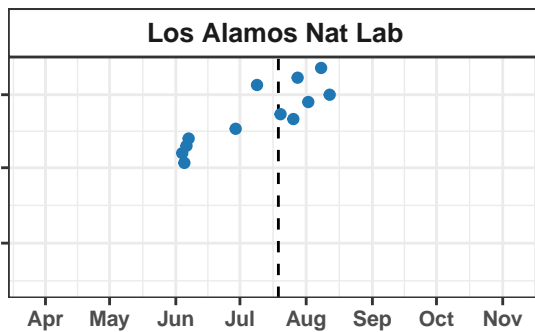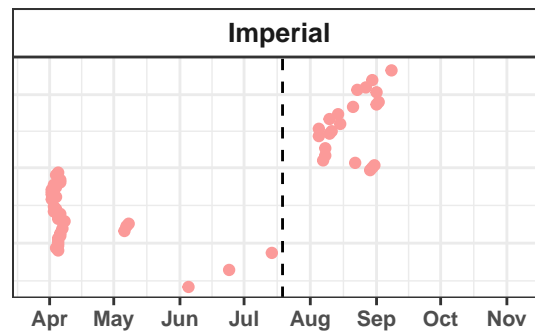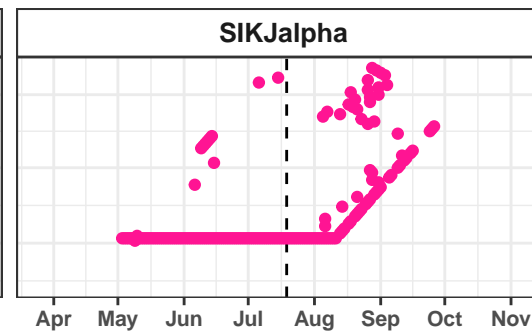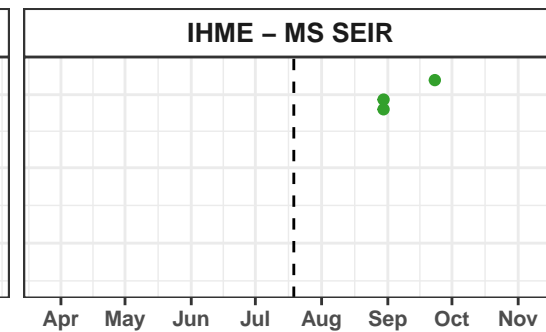

Actual and Predicted Peak

# Kansas – Smoothed Daily Deaths

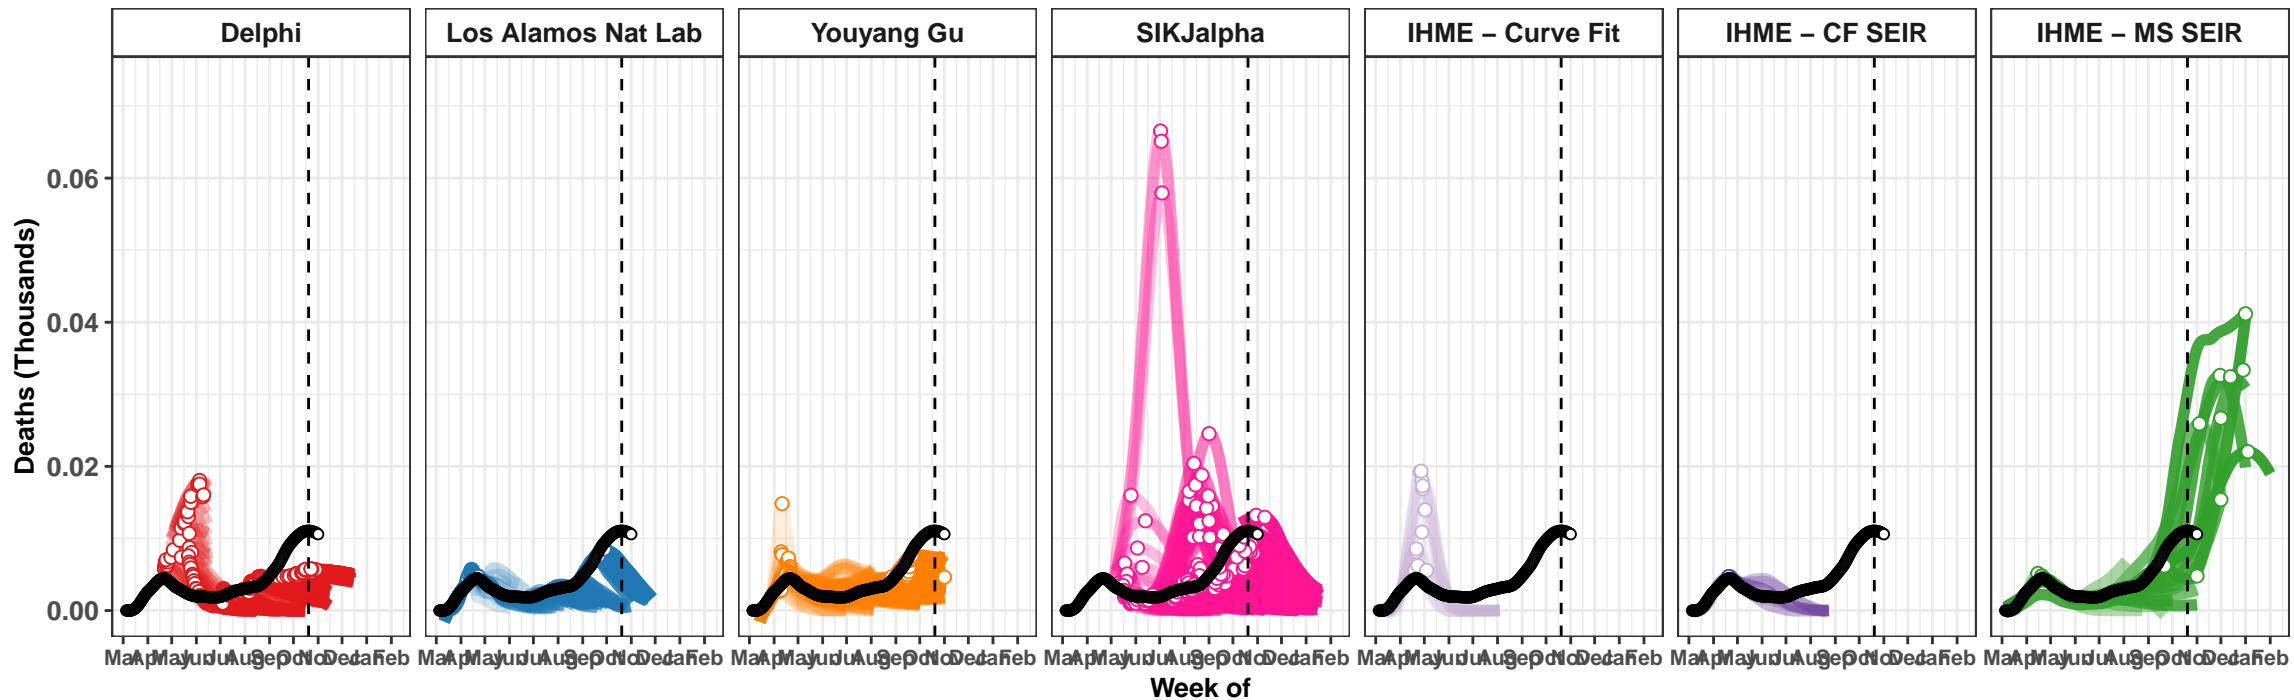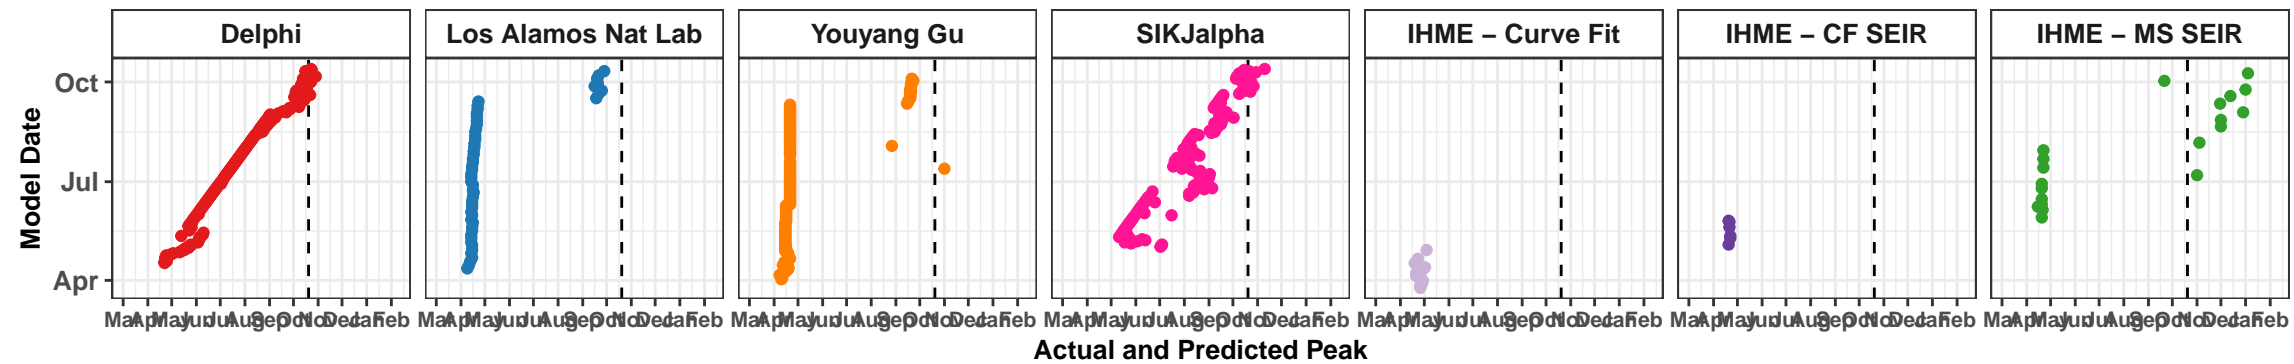

# New Mexico – Smoothed Daily Deaths

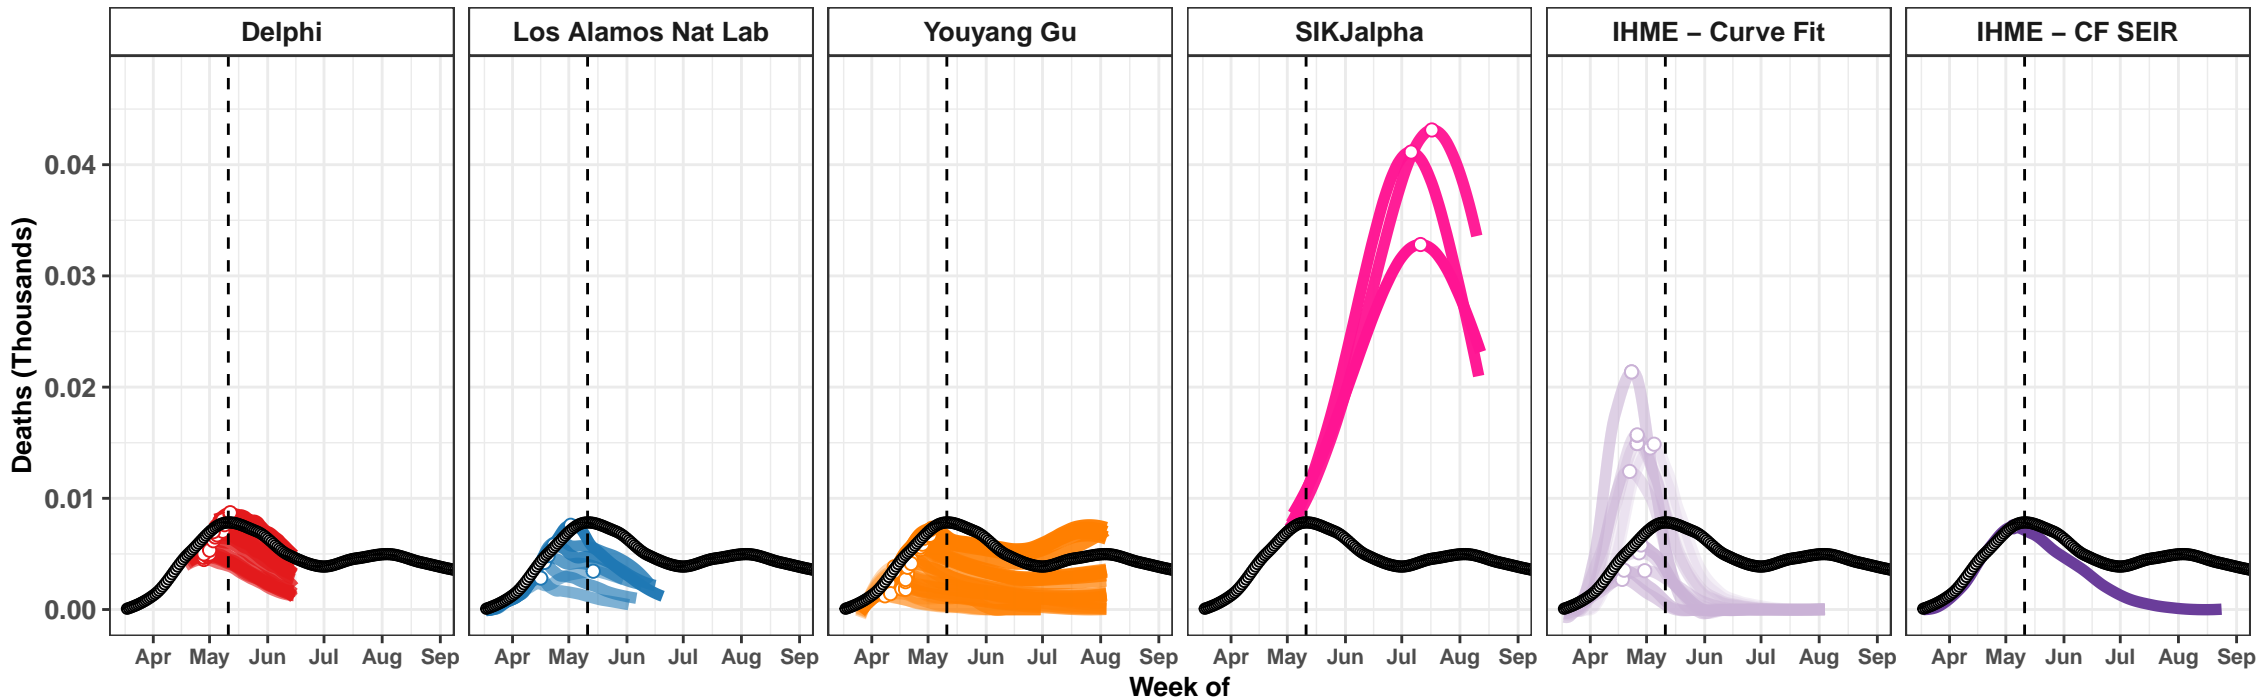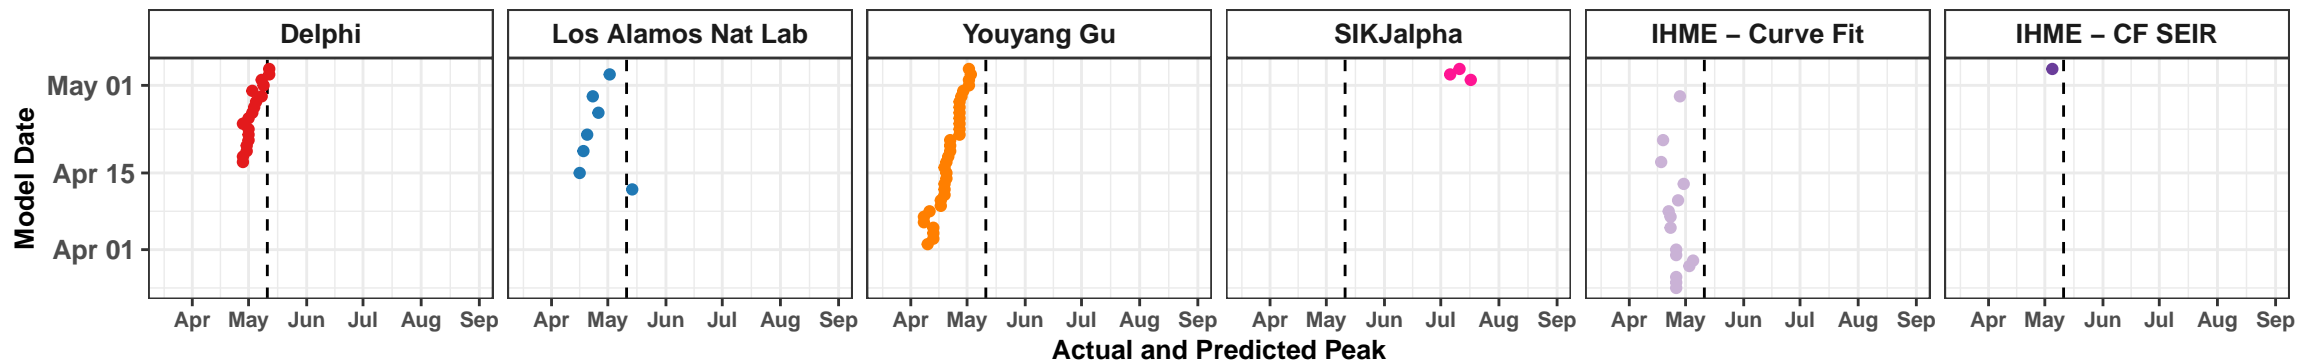



# Kenya – Smoothed Daily Deaths

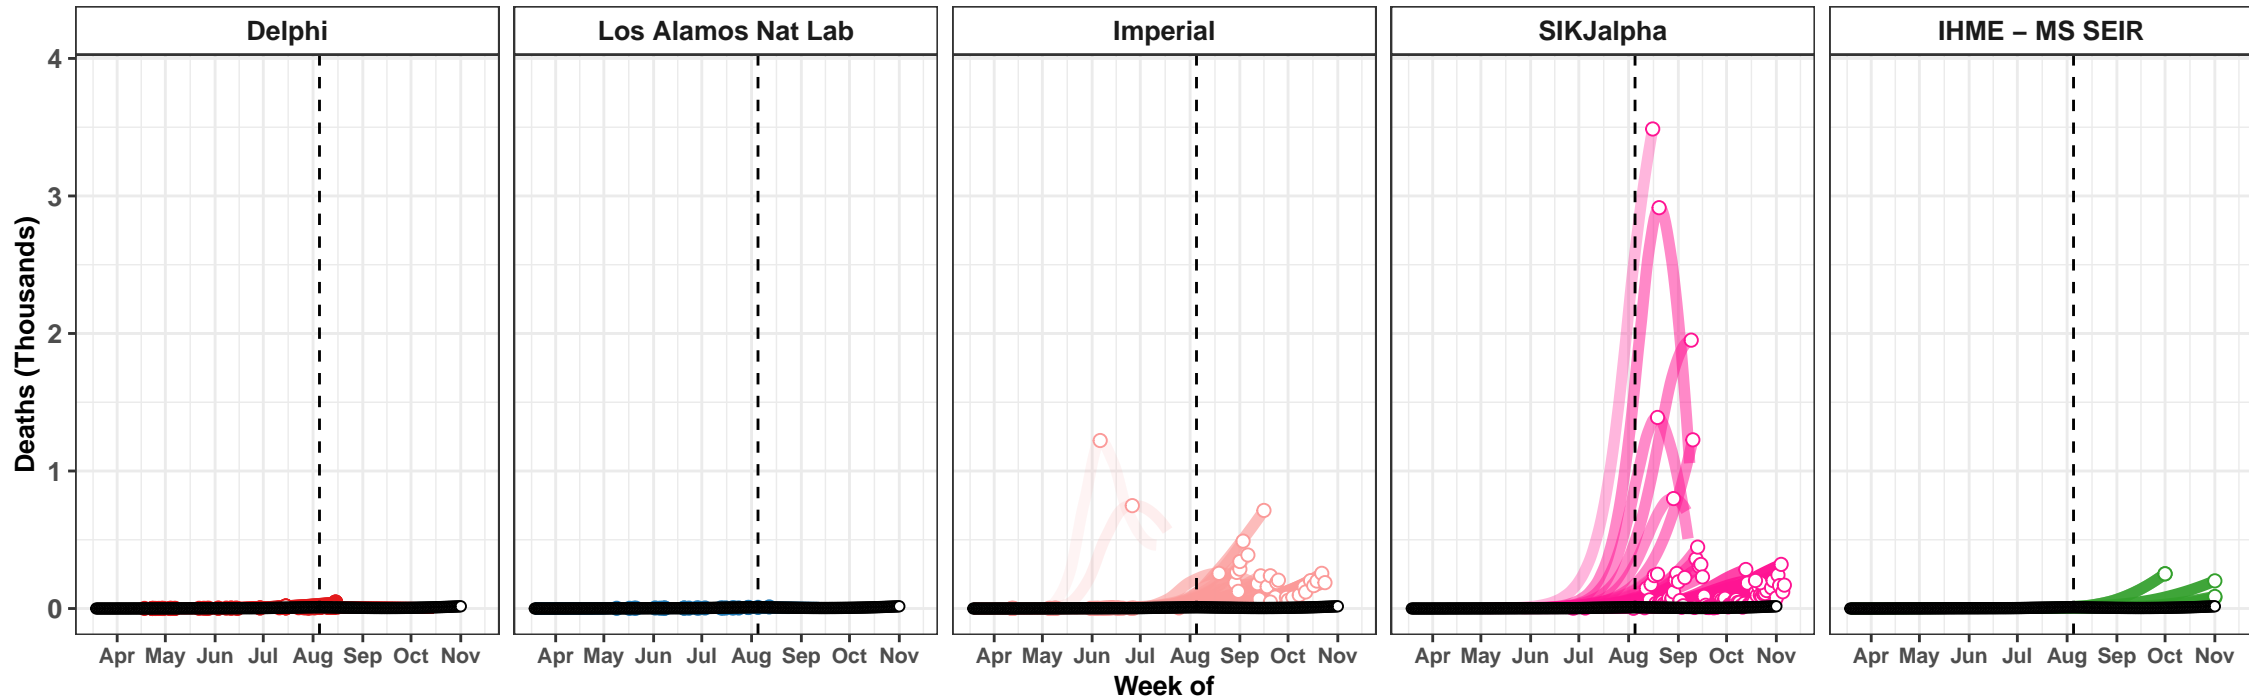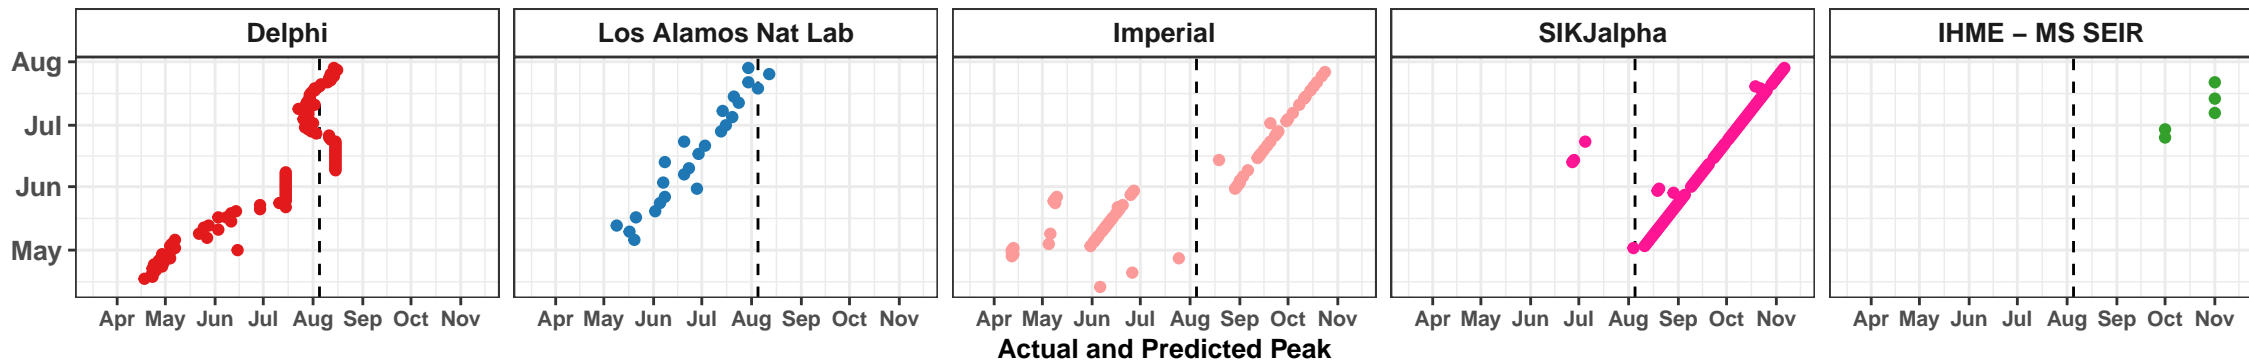

# Macedonia – Smoothed Daily Deaths

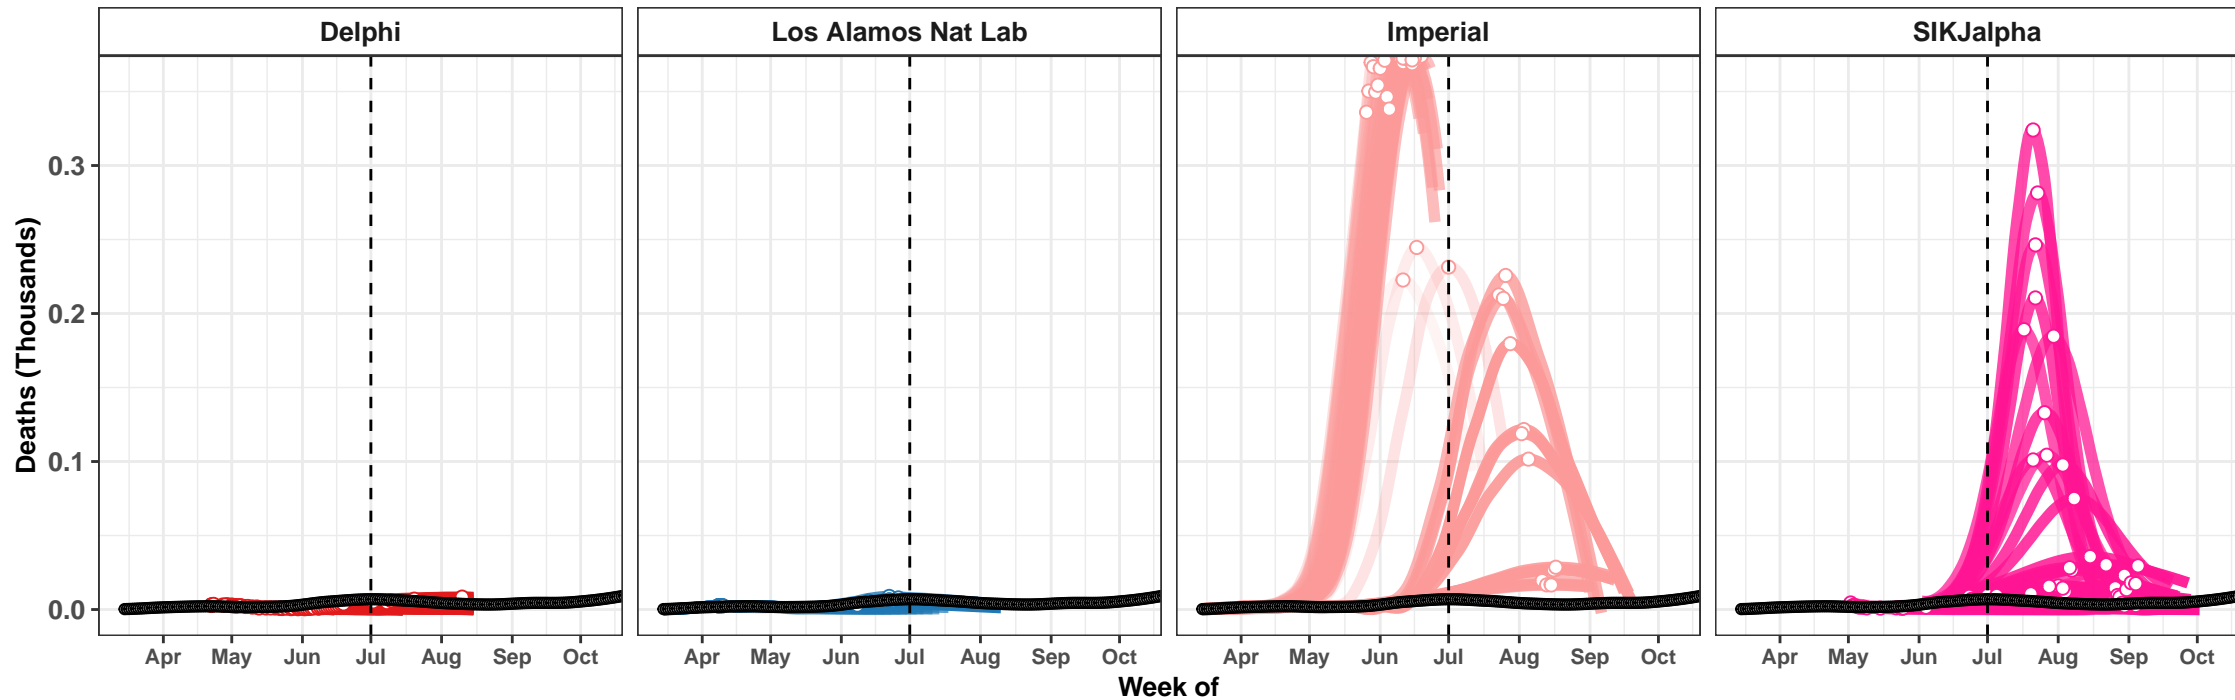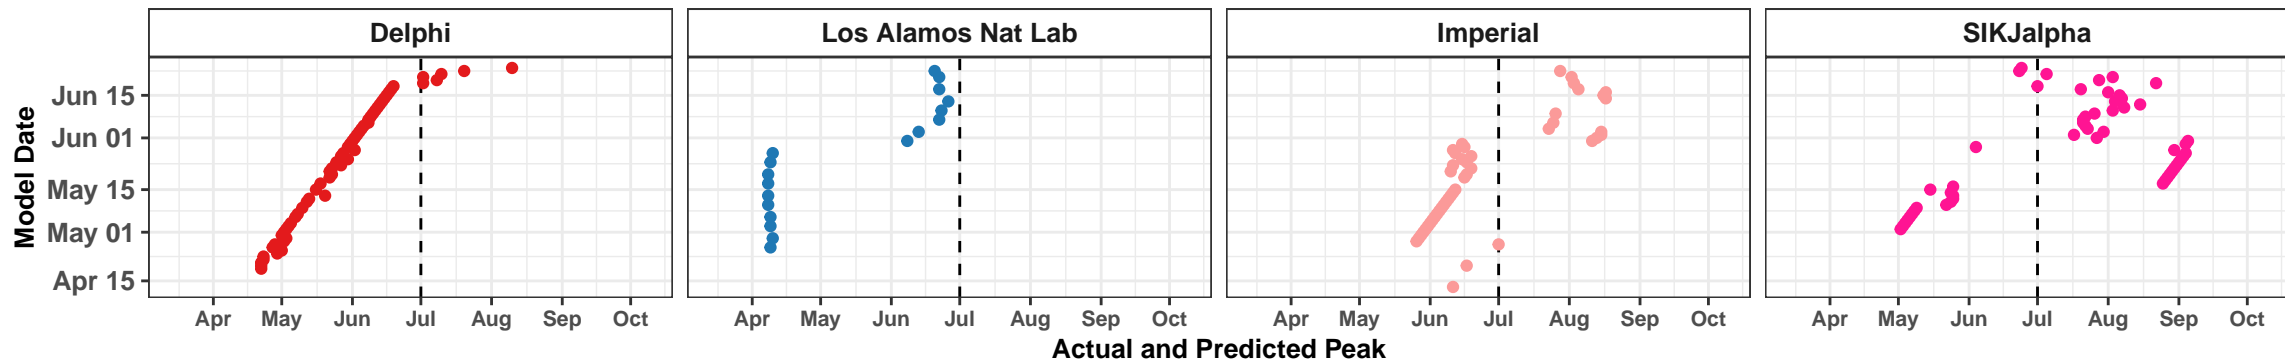

# Belarus – Smoothed Daily Deaths

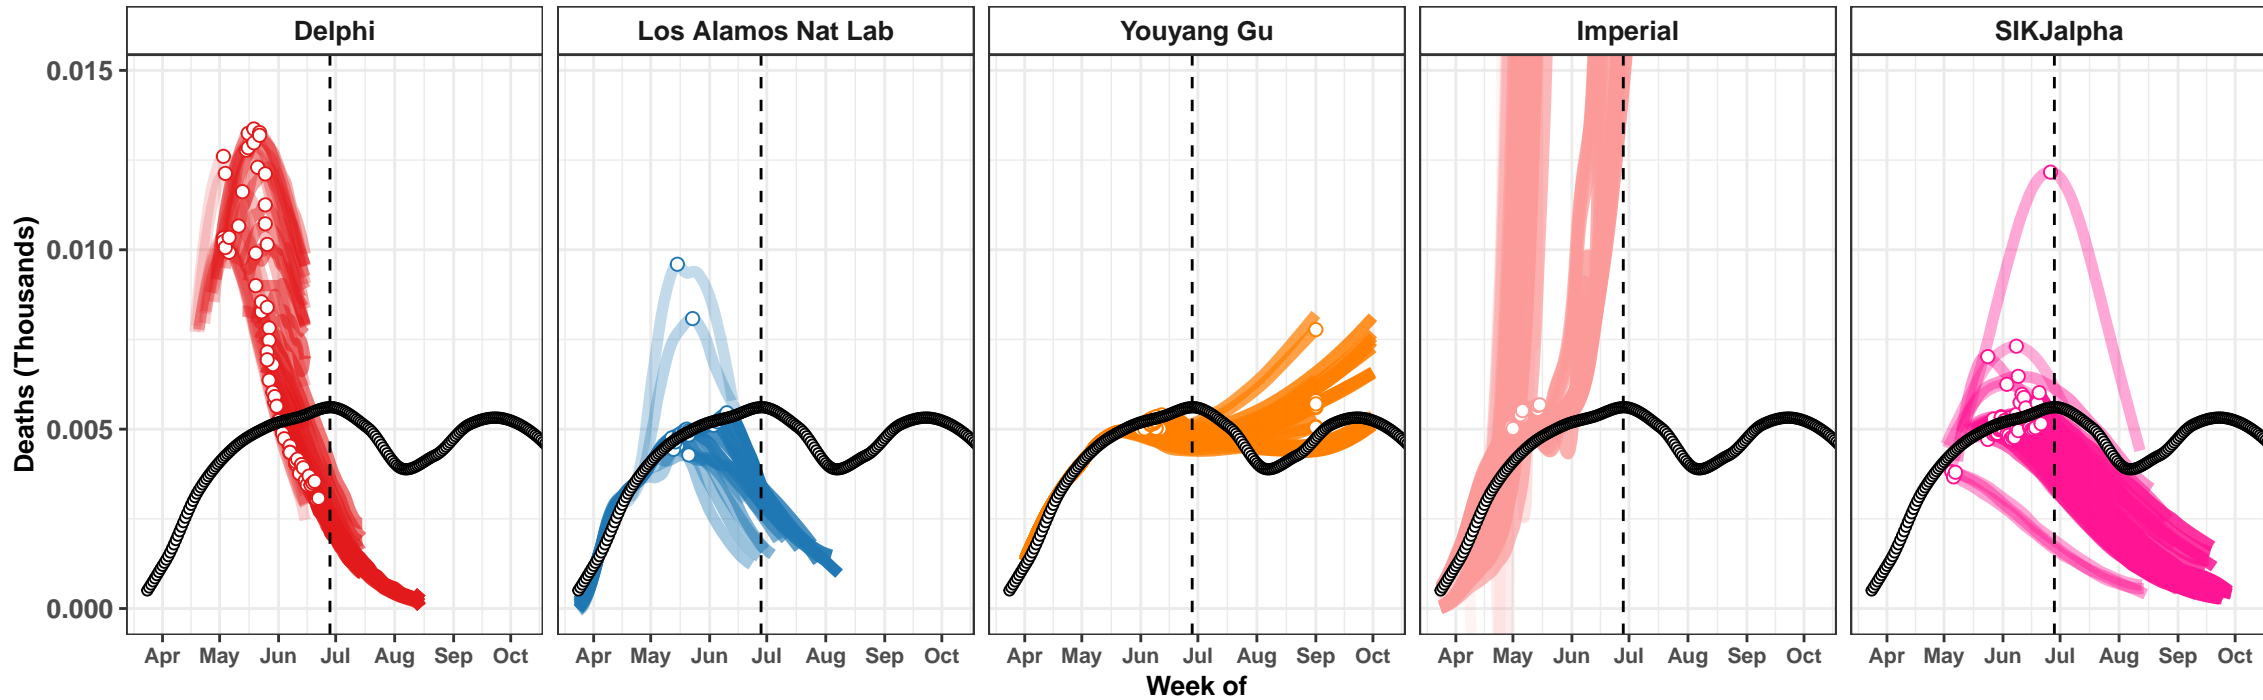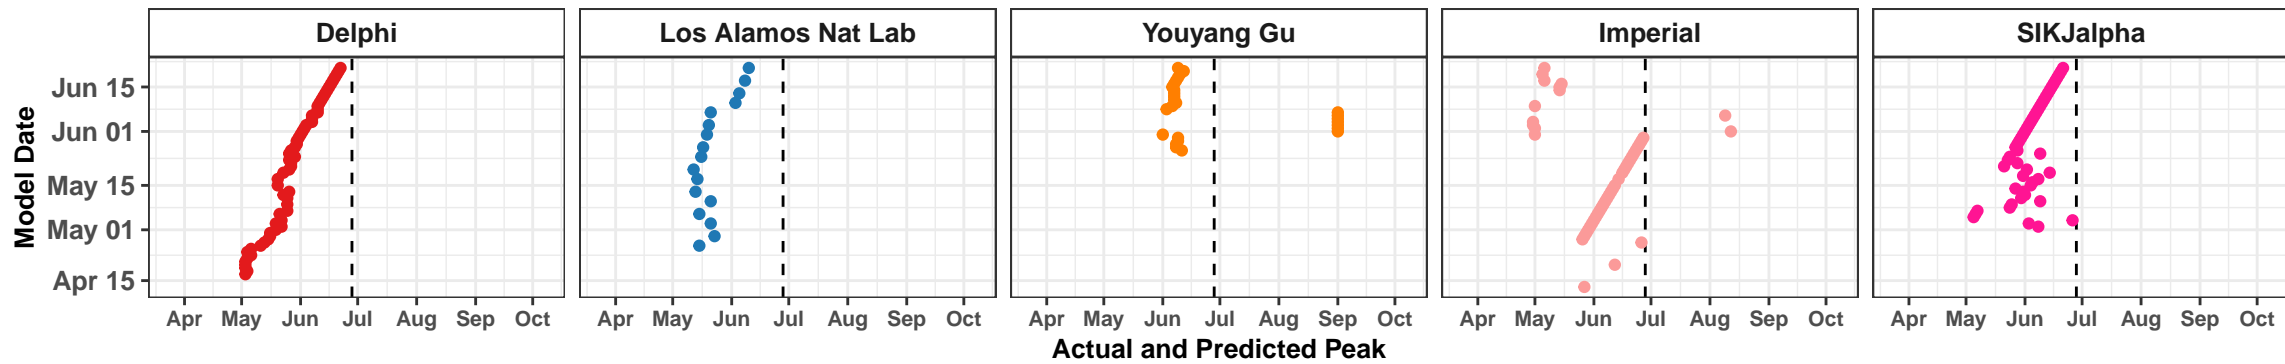

# El Salvador – Smoothed Daily Deaths

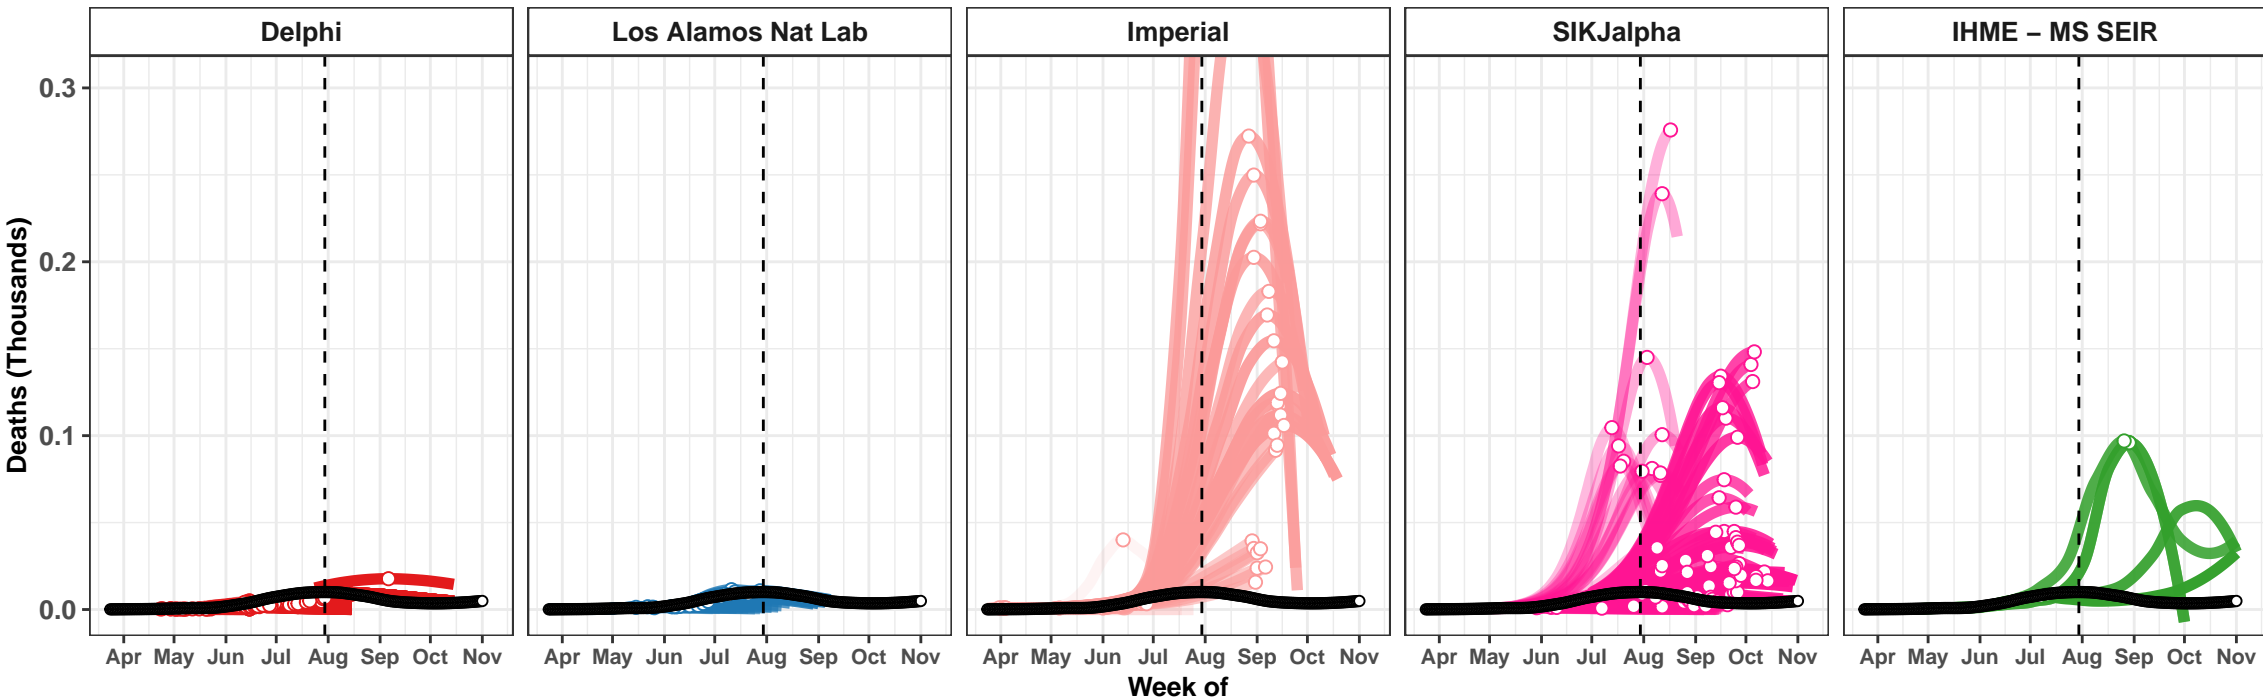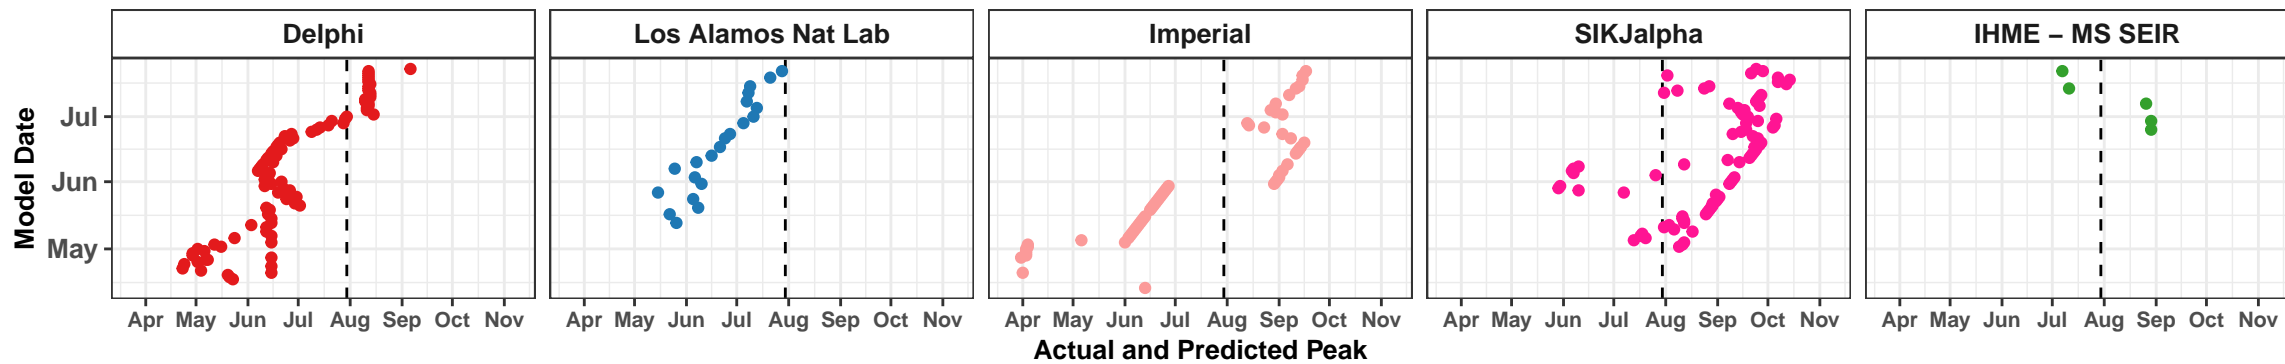

# Australia – Smoothed Daily Deaths

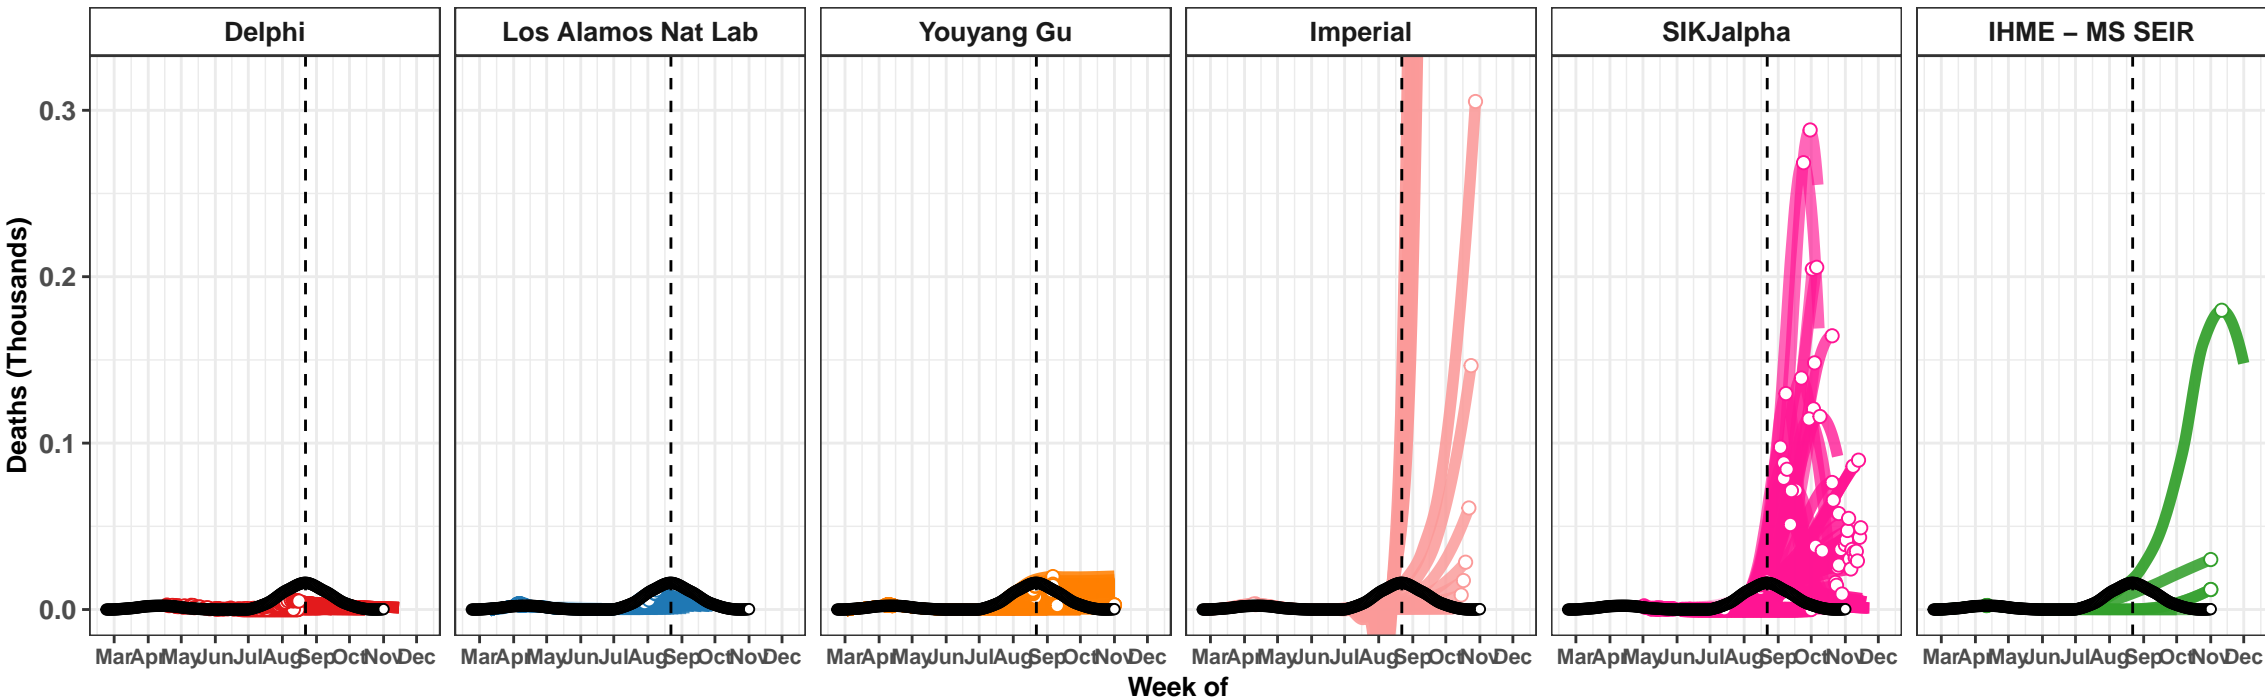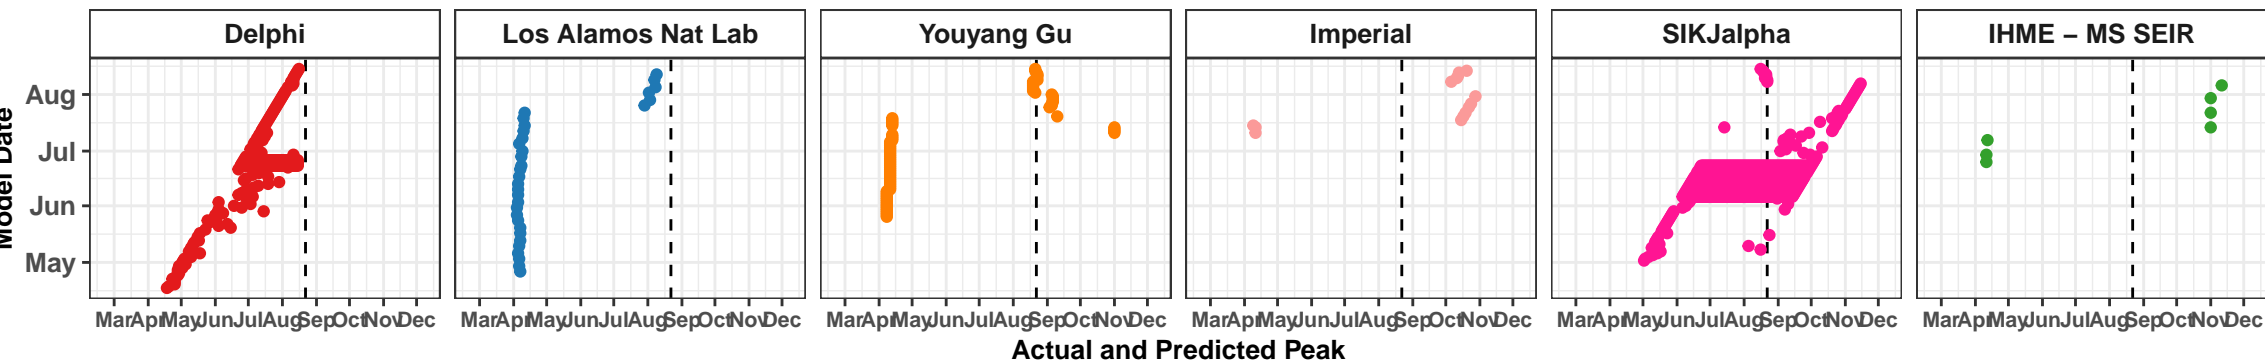

# Libya – Smoothed Daily Deaths

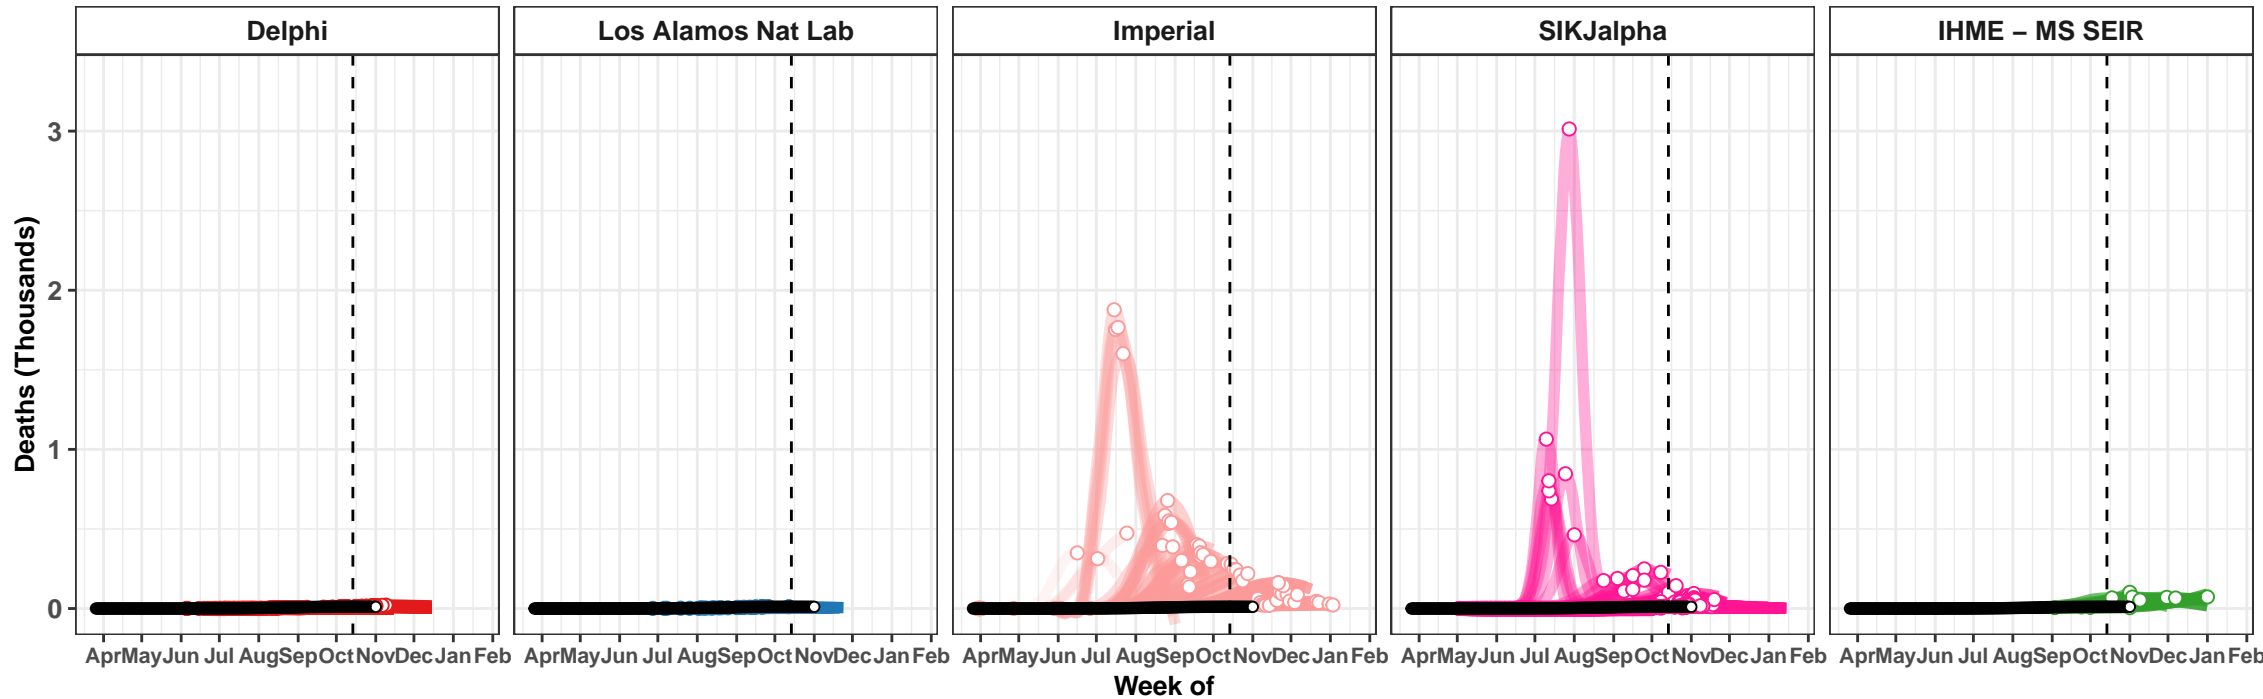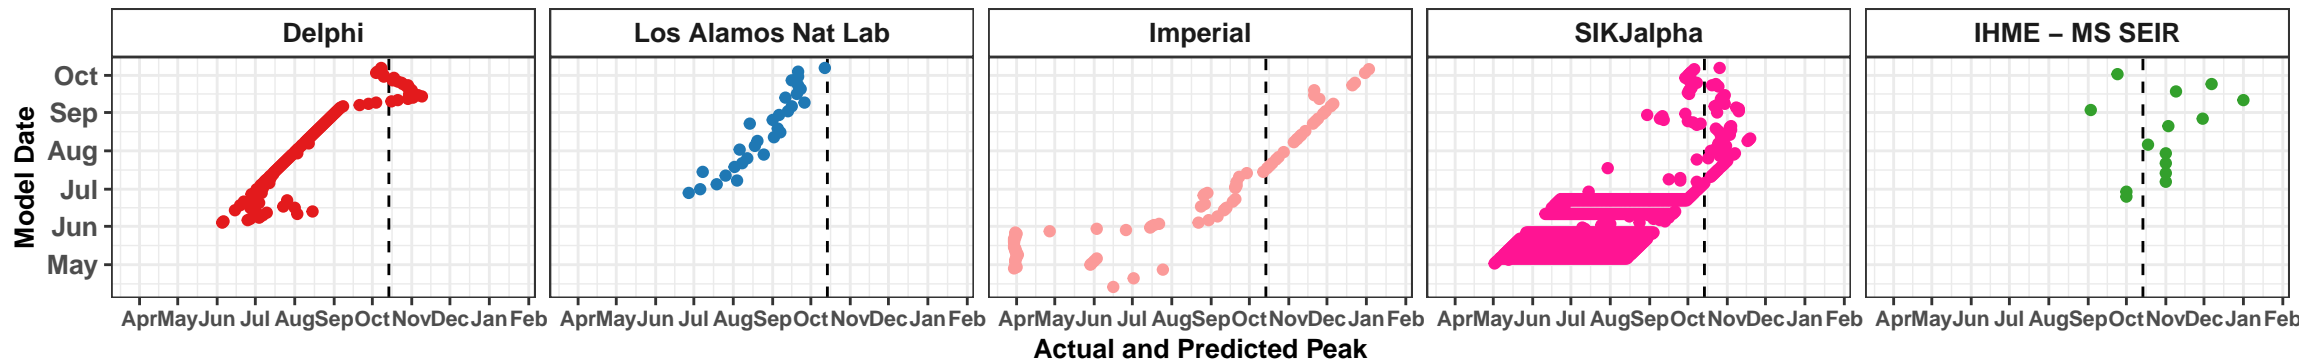

# Sudan – Smoothed Daily Deaths

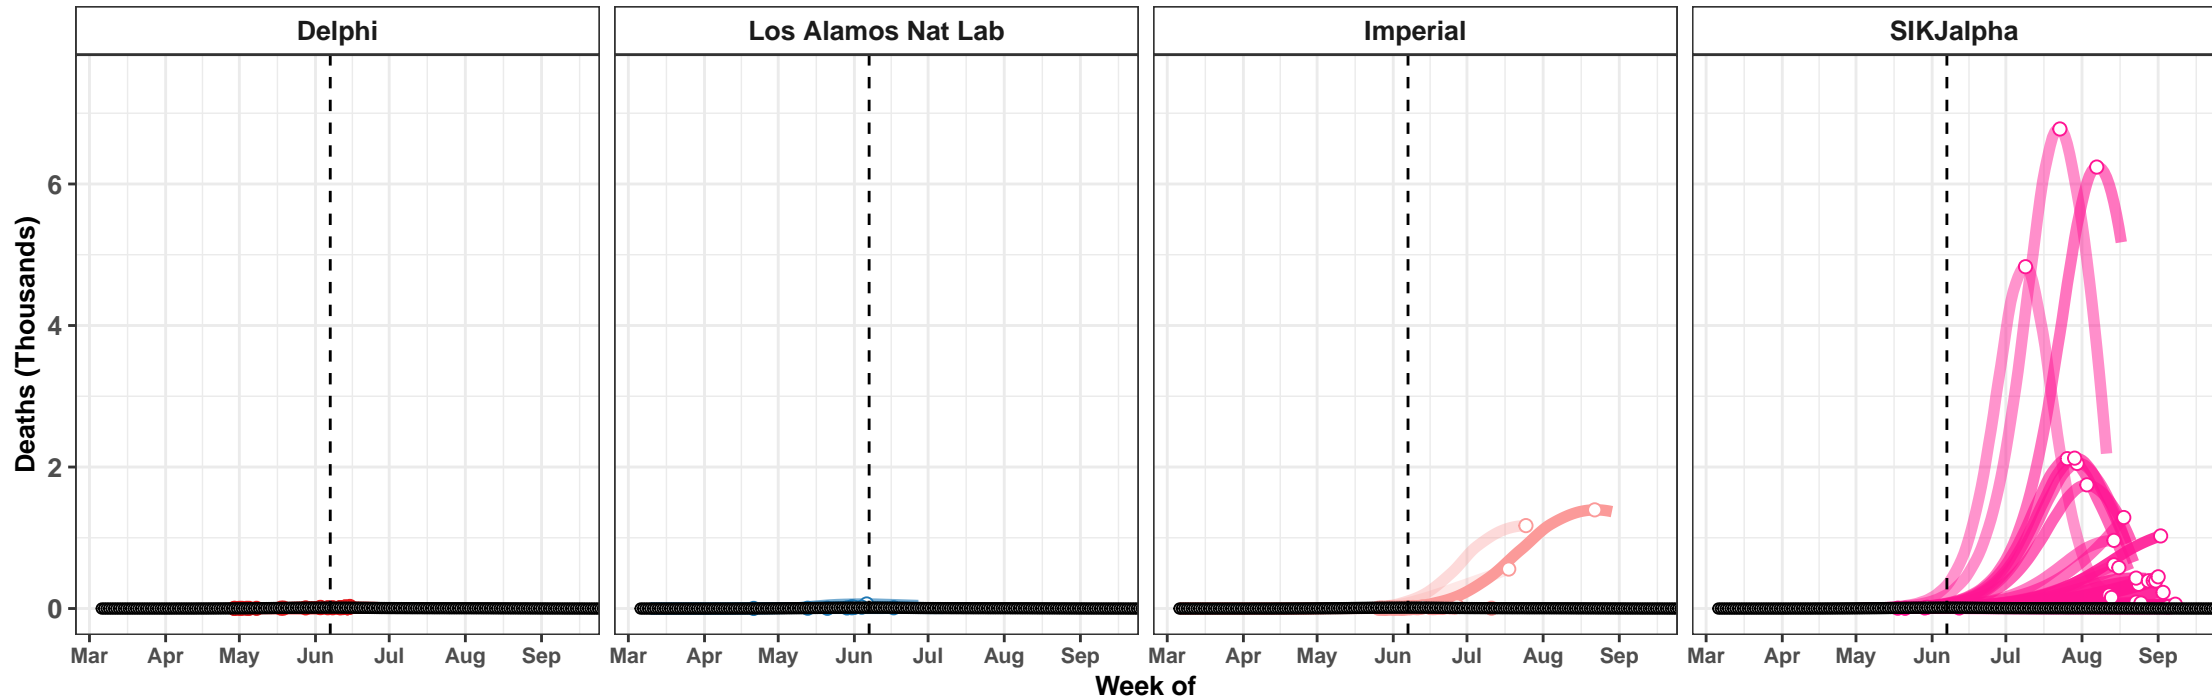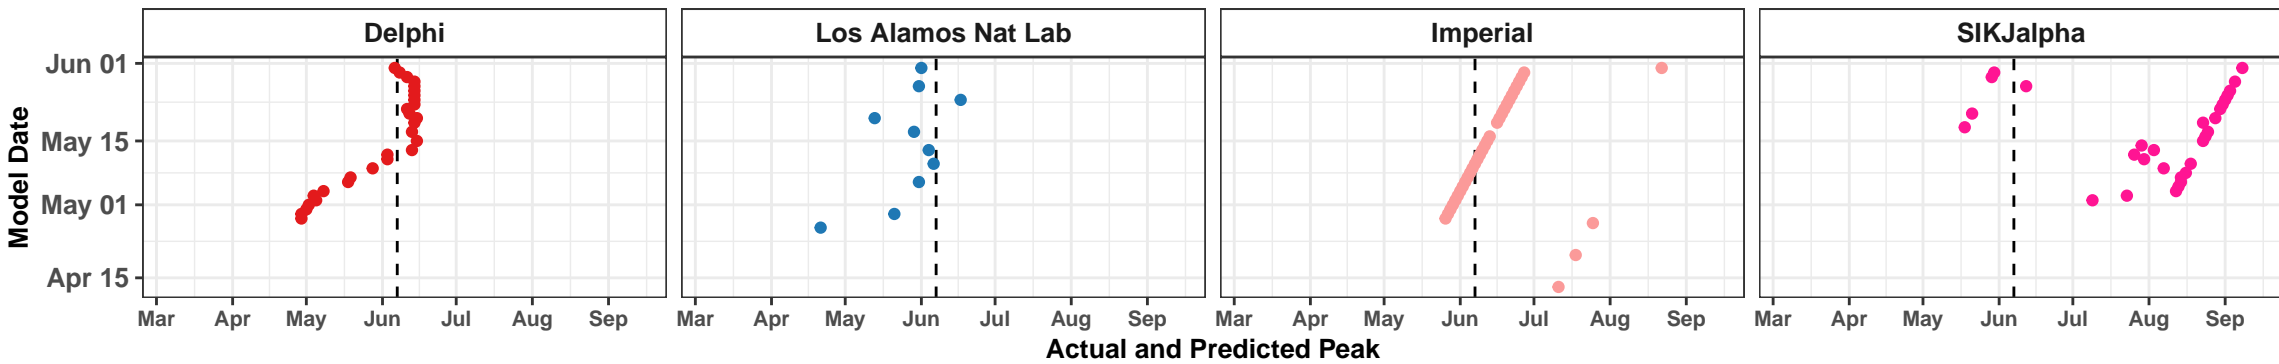

# Puerto Rico – Smoothed Daily Deaths

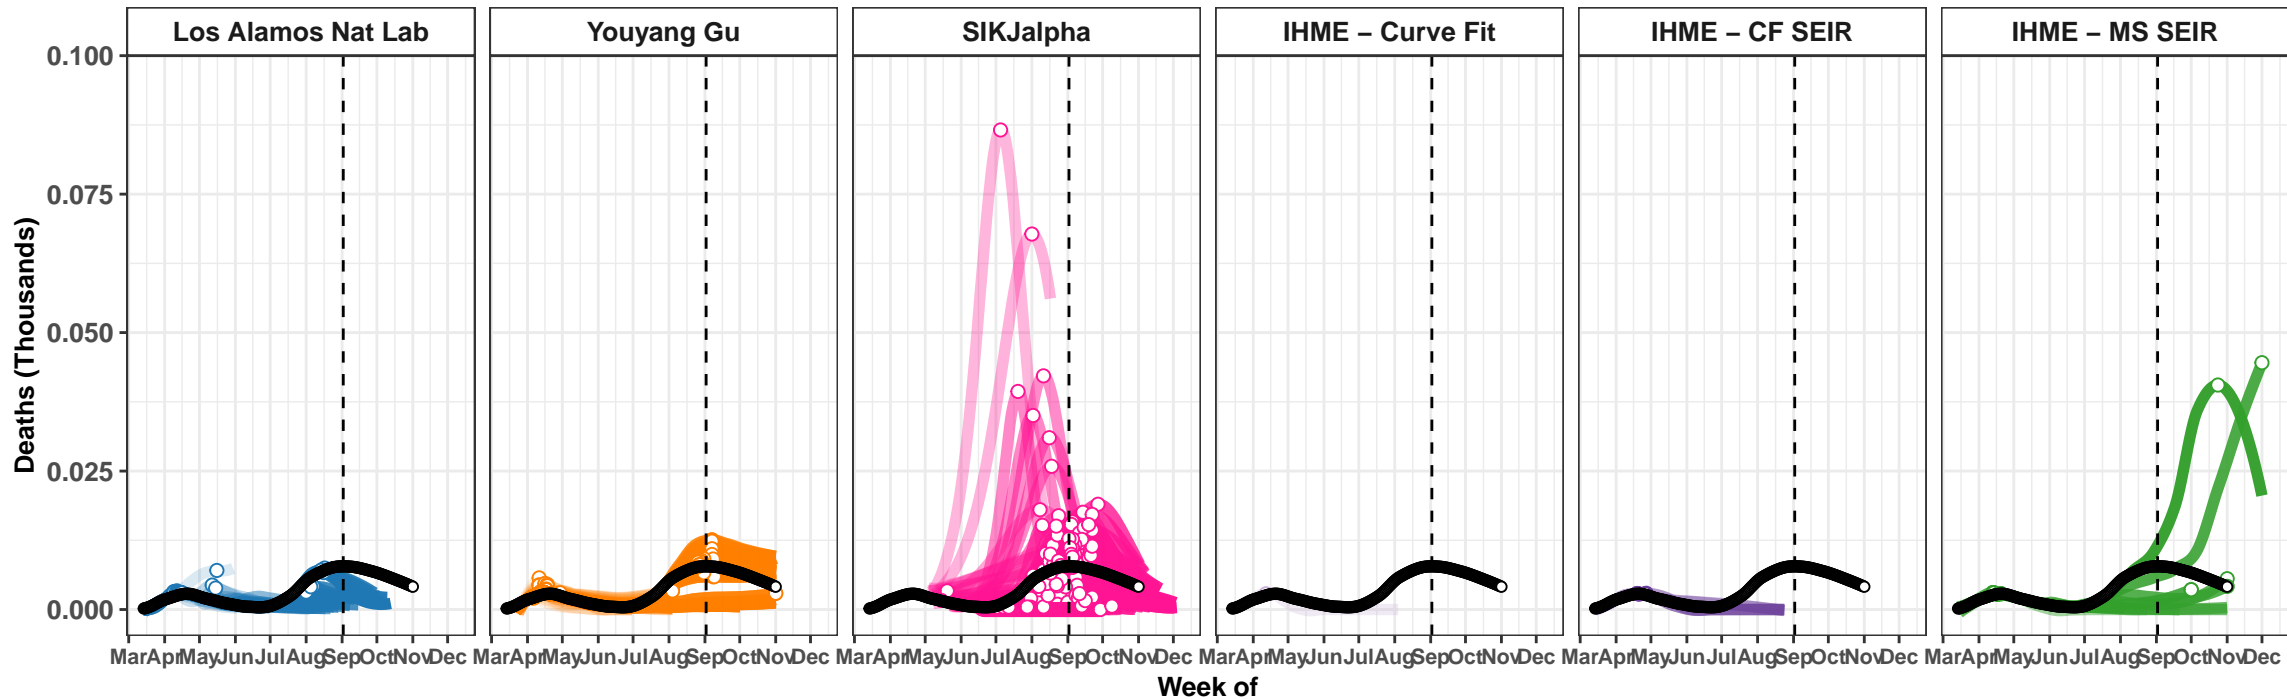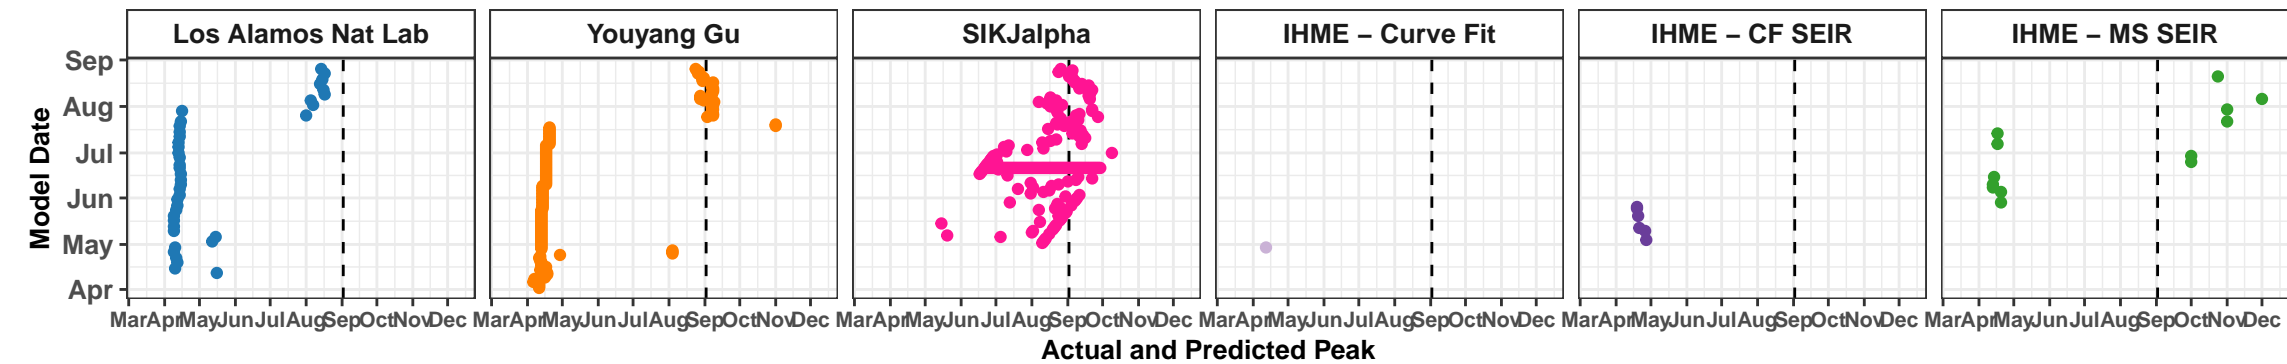



# Serbia – Smoothed Daily Deaths

Imperial

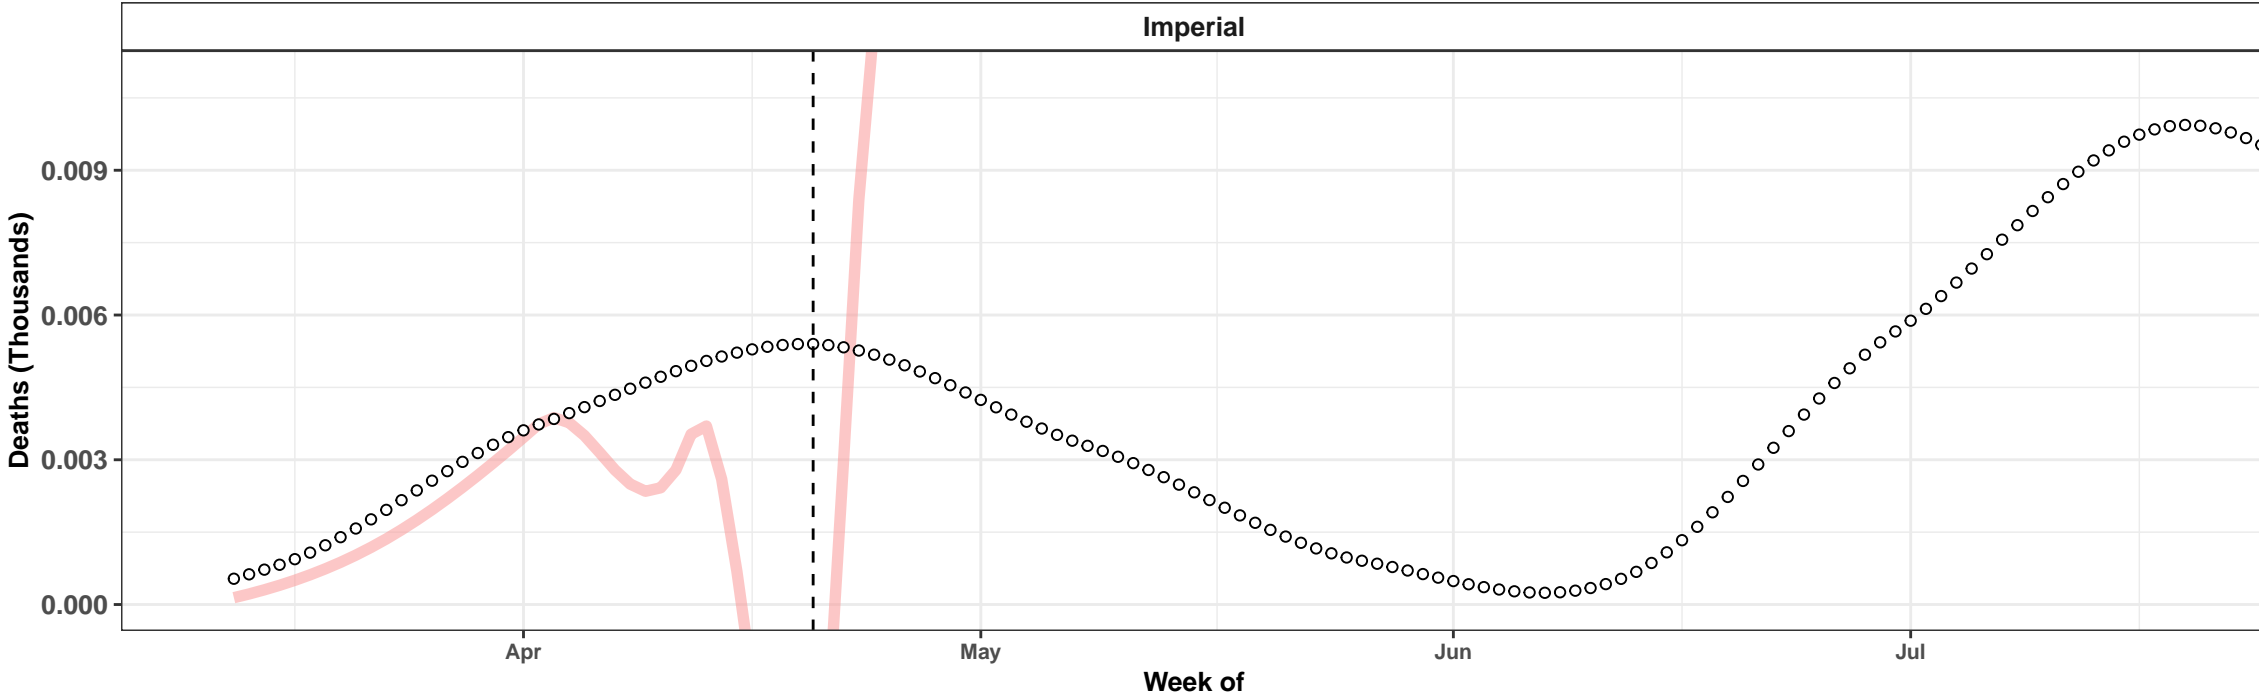

Imperial

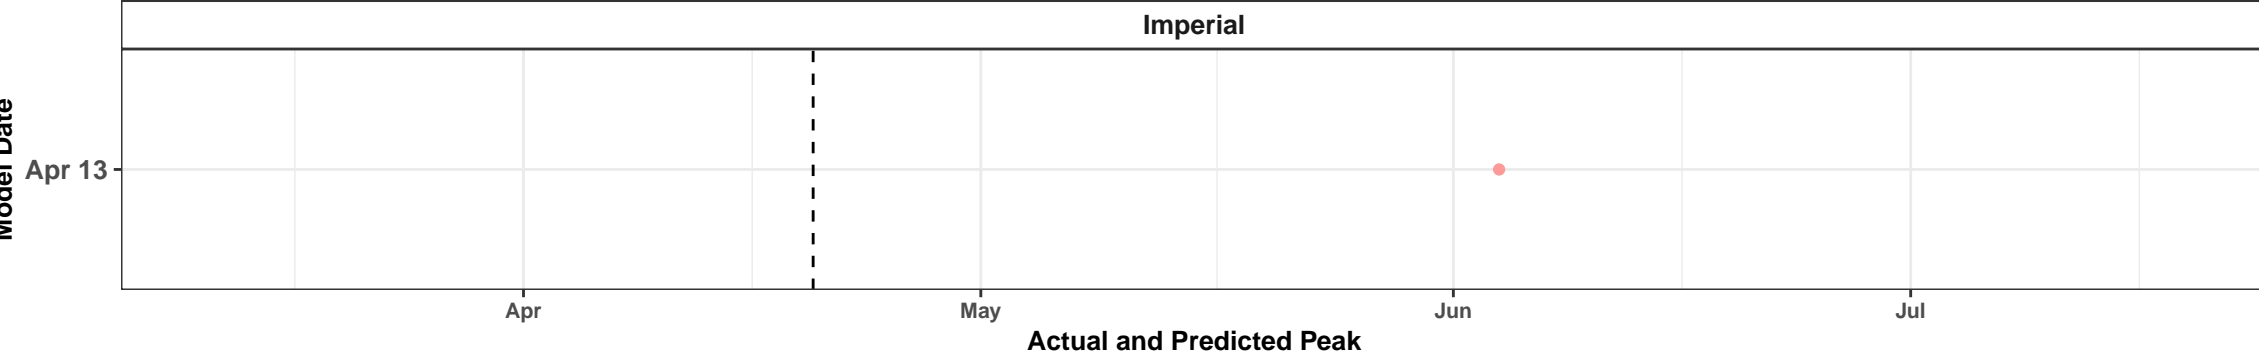

# Venezuela – Smoothed Daily Deaths

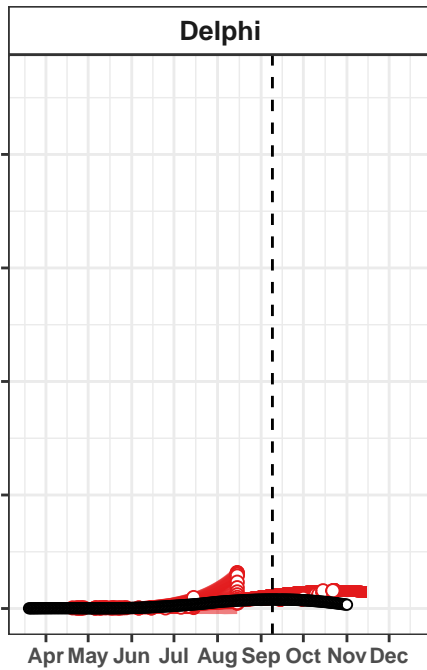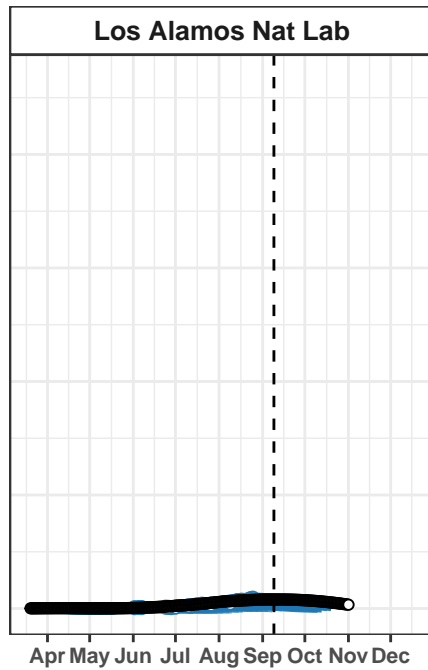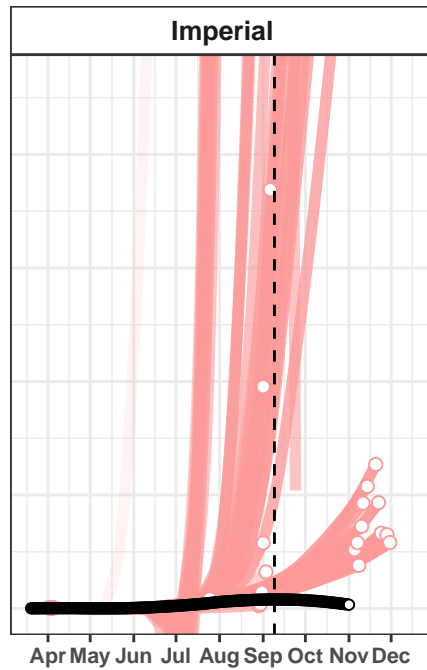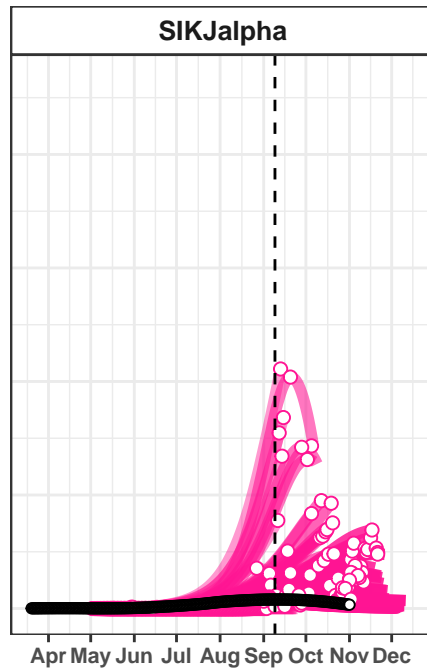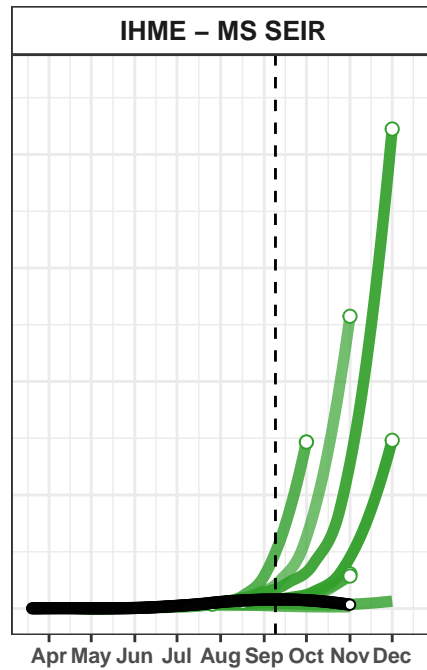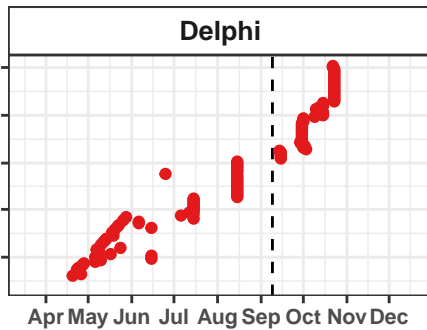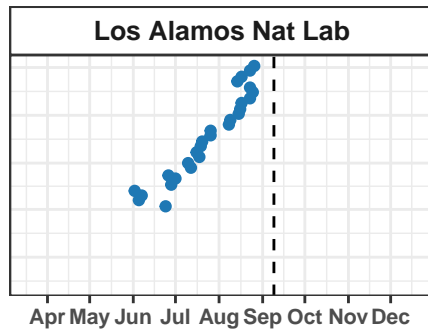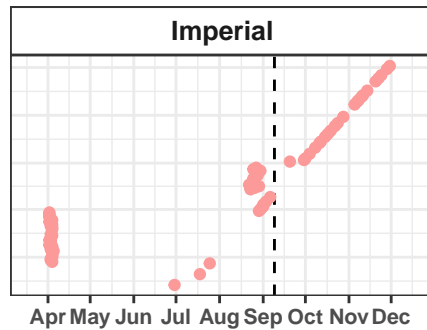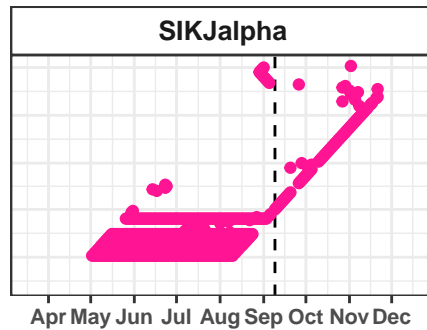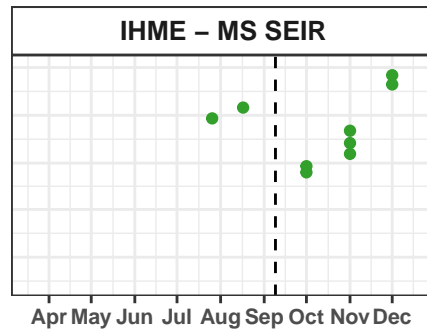

# Kuwait – Smoothed Daily Deaths

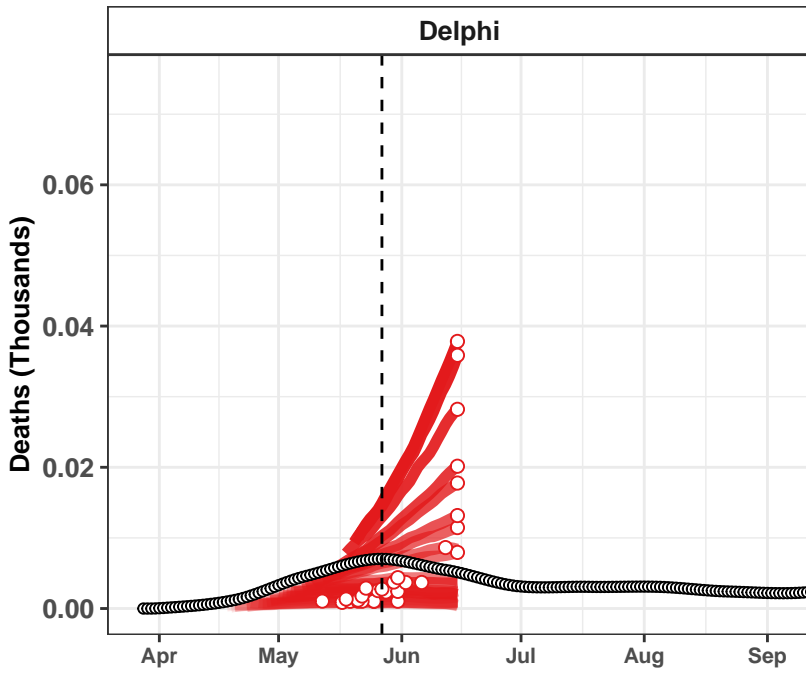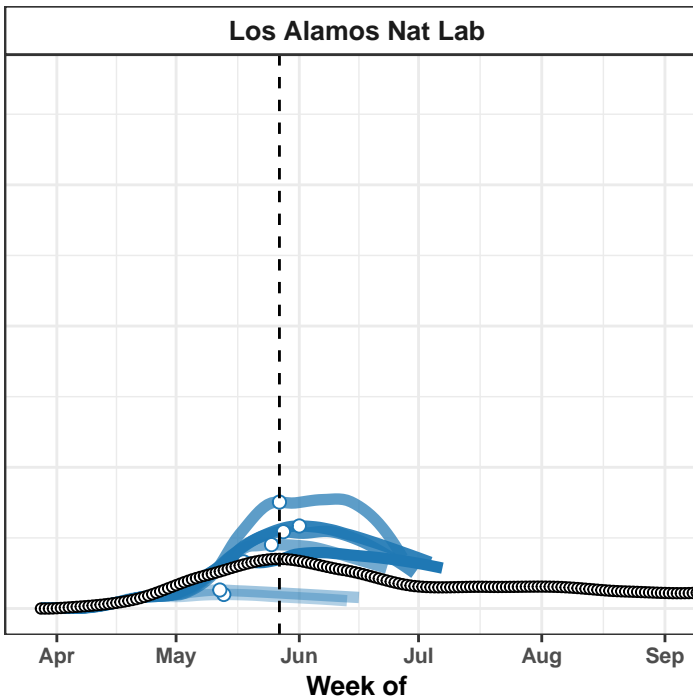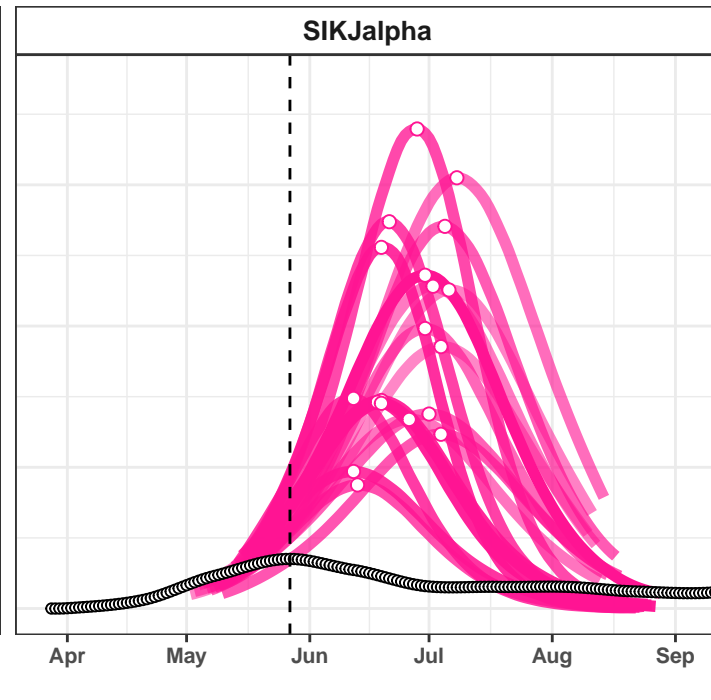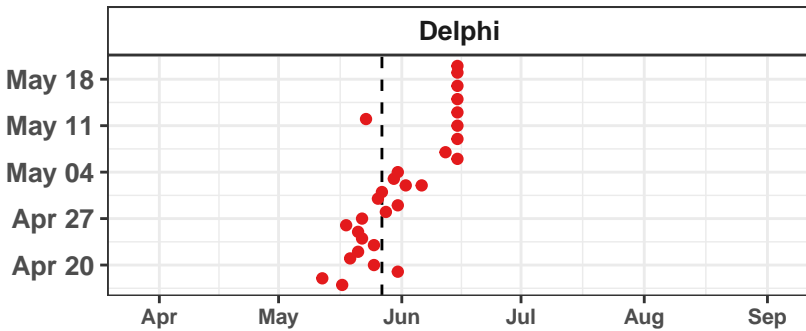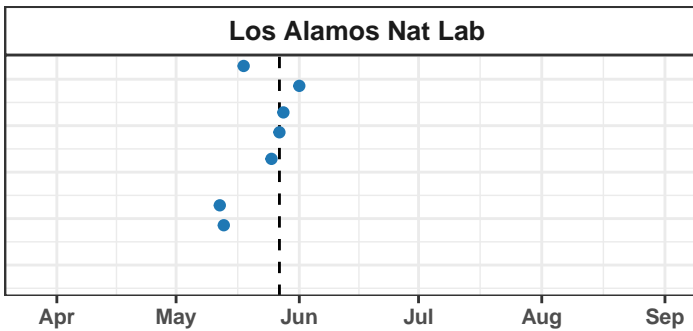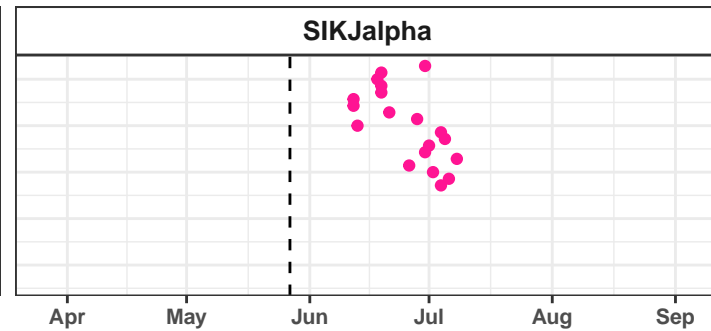

Actual and Predicted Peak

# Azerbaijan – Smoothed Daily Deaths

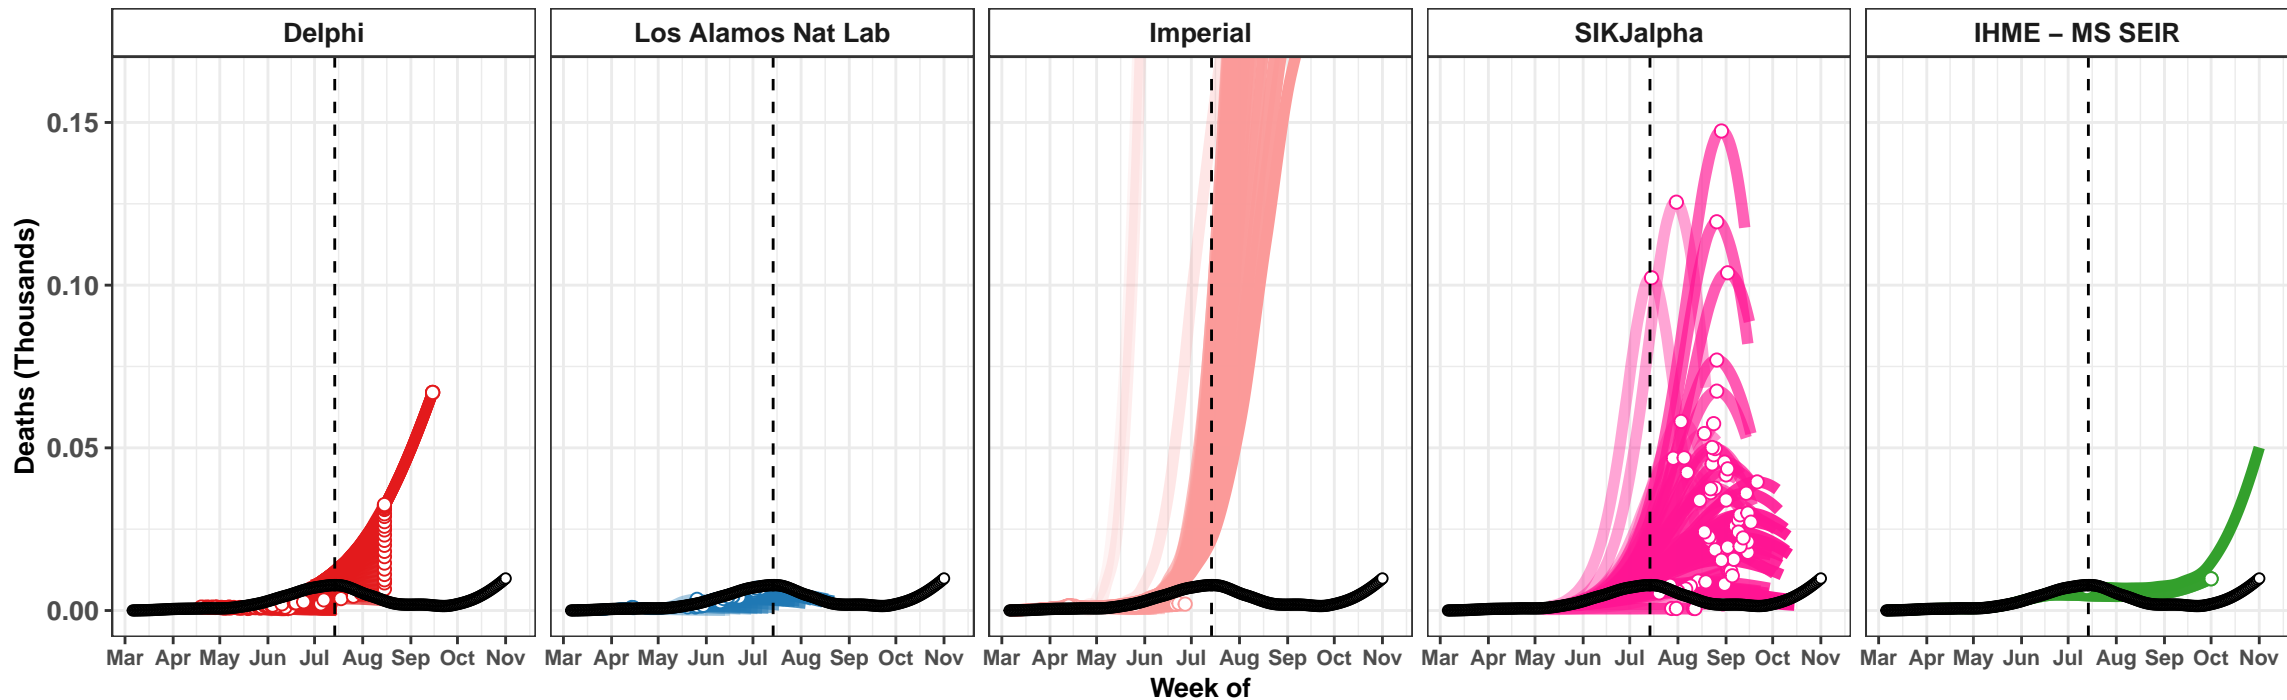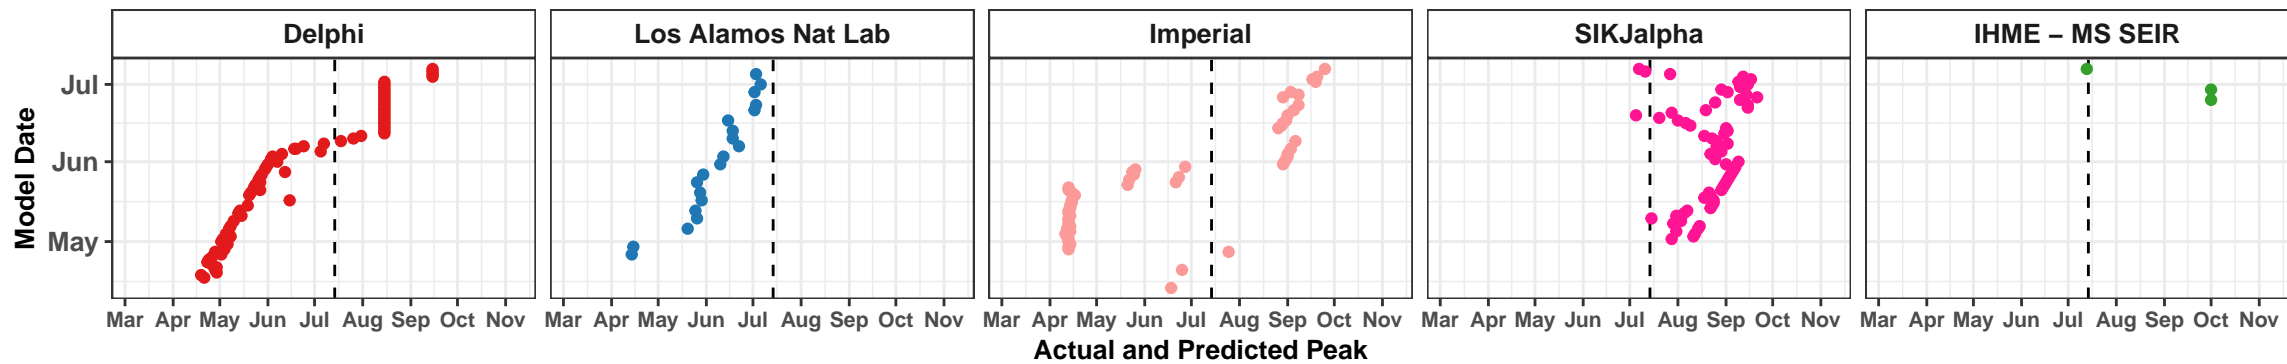

# Denmark – Smoothed Daily Deaths

## Youyang Gu

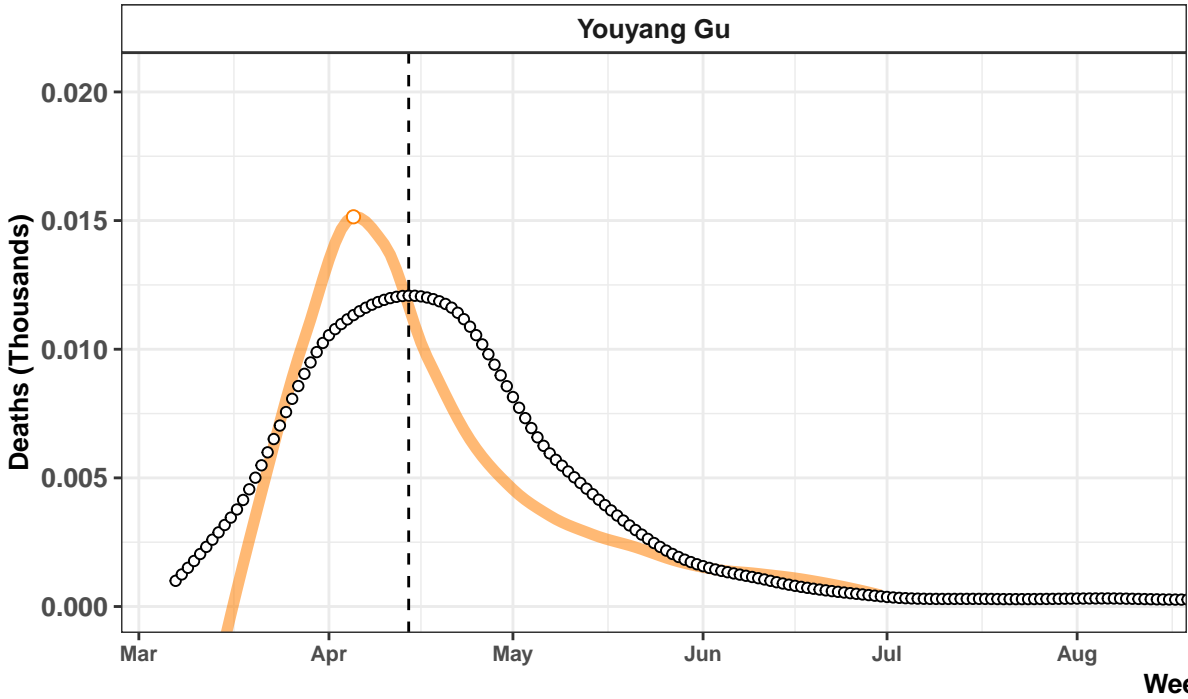

## IHME – Curve Fit

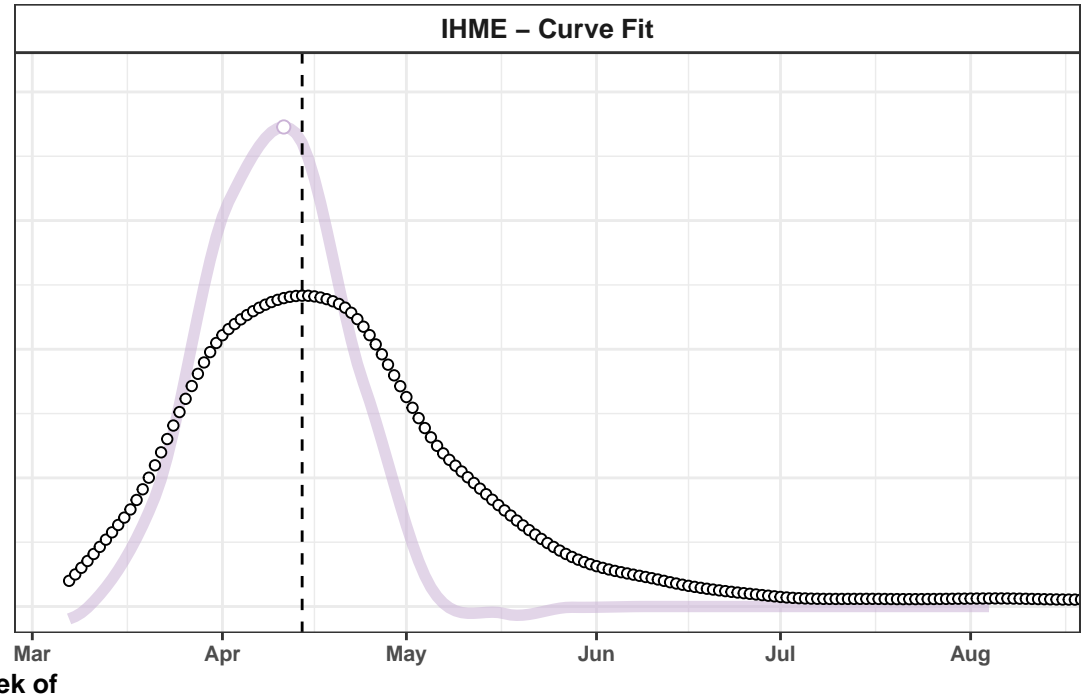

## Youyang Gu

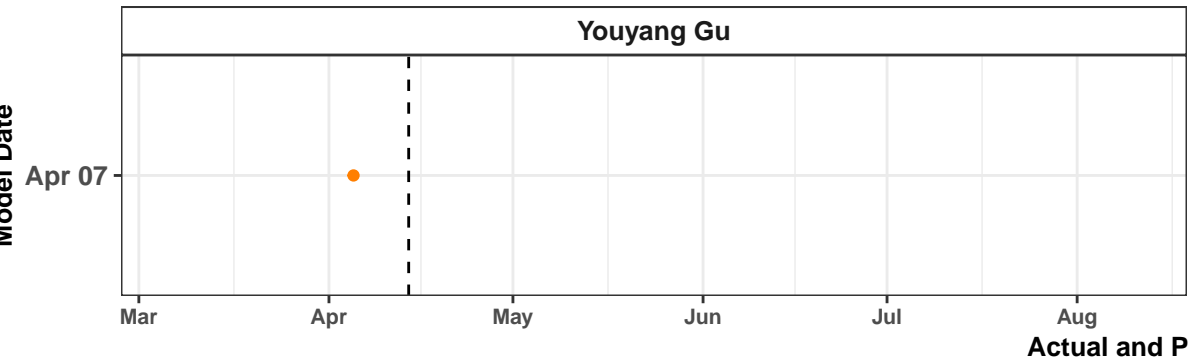

## IHME – Curve Fit

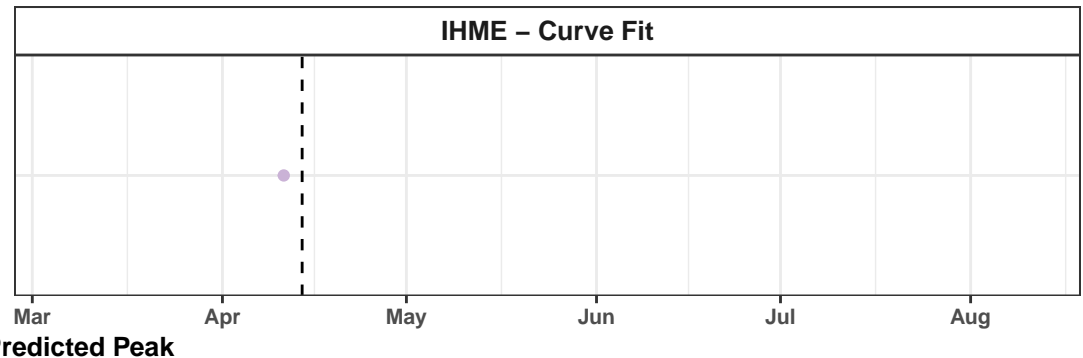

# Delaware – Smoothed Daily Deaths

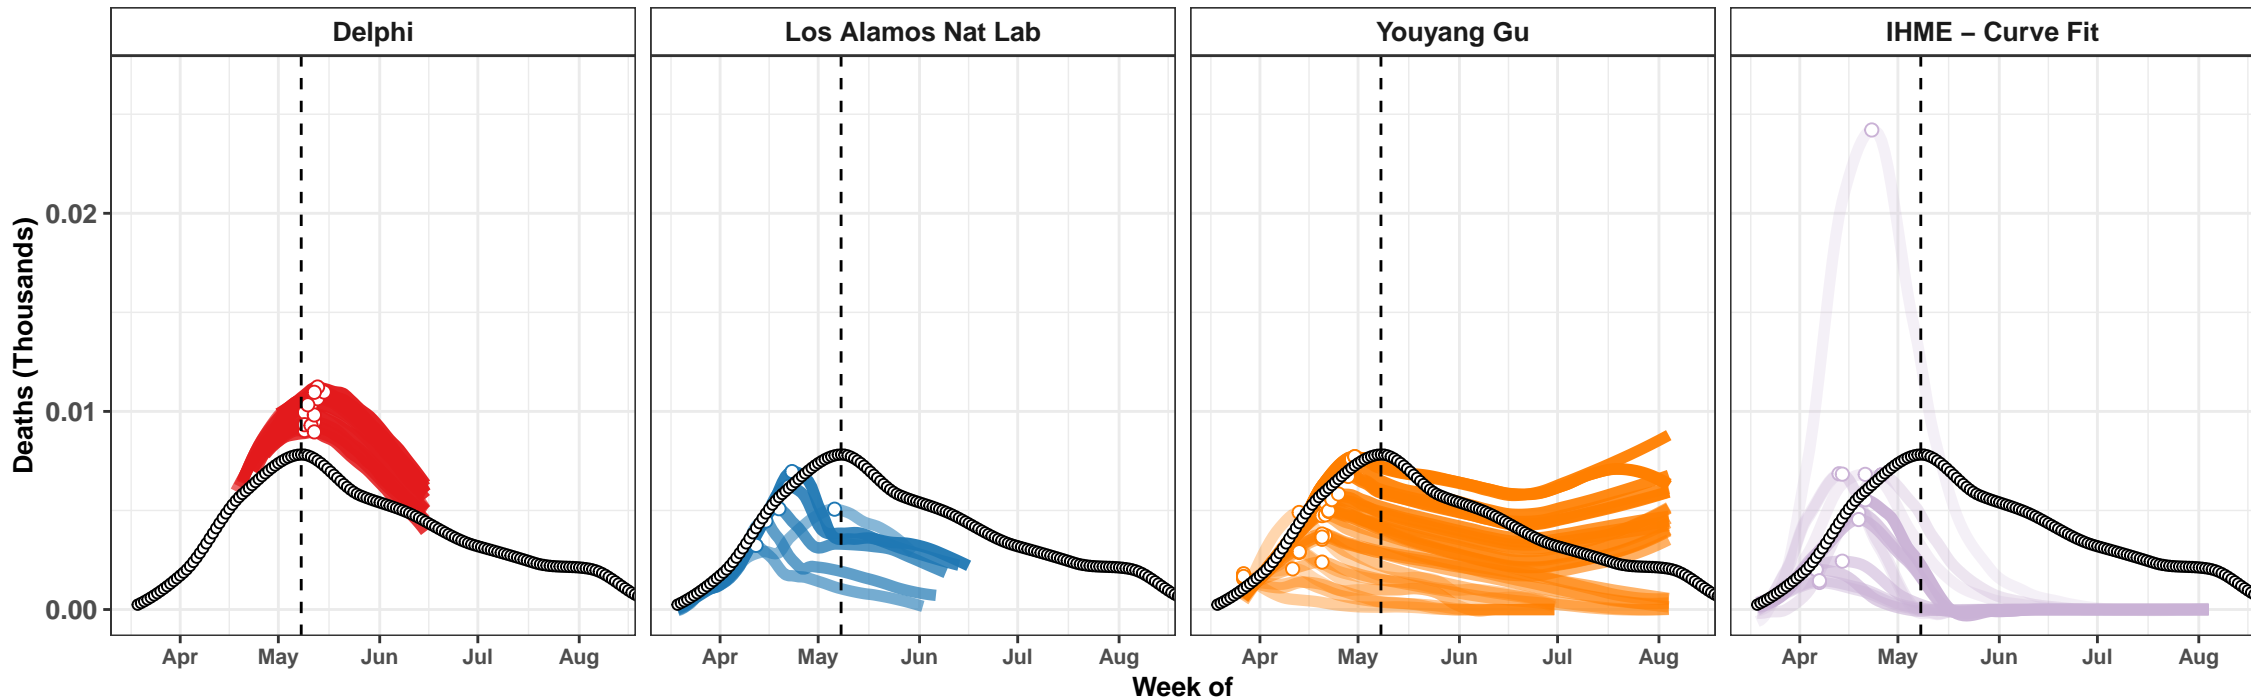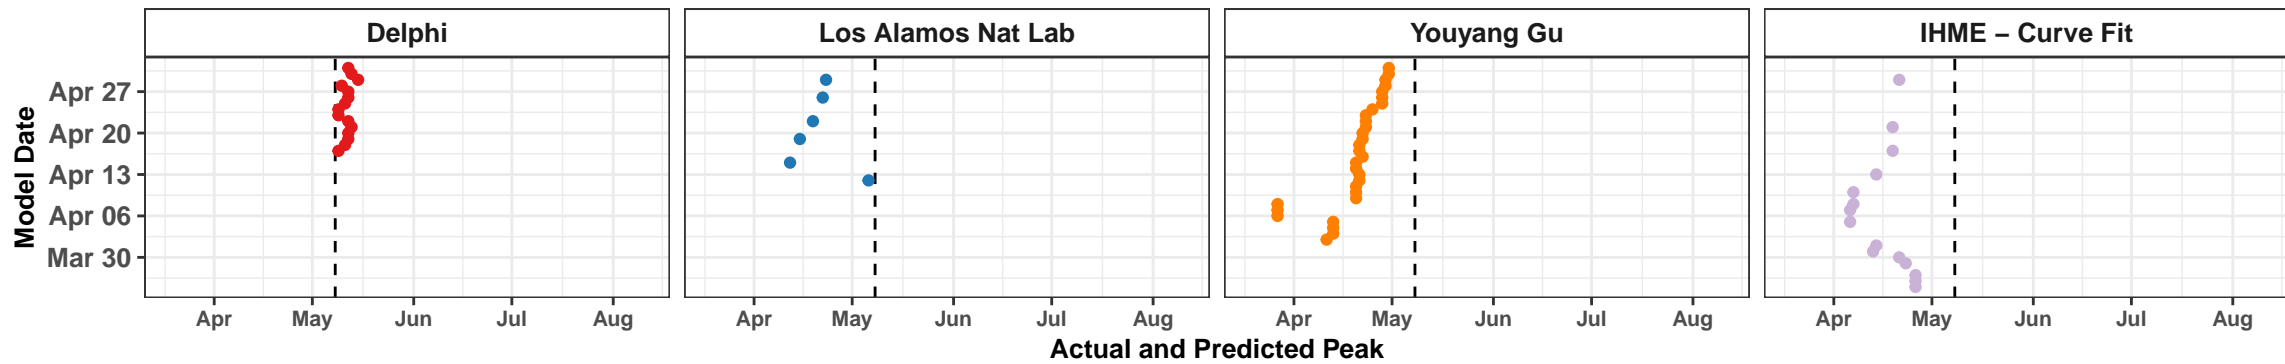

# District of Columbia – Smoothed Daily Deaths

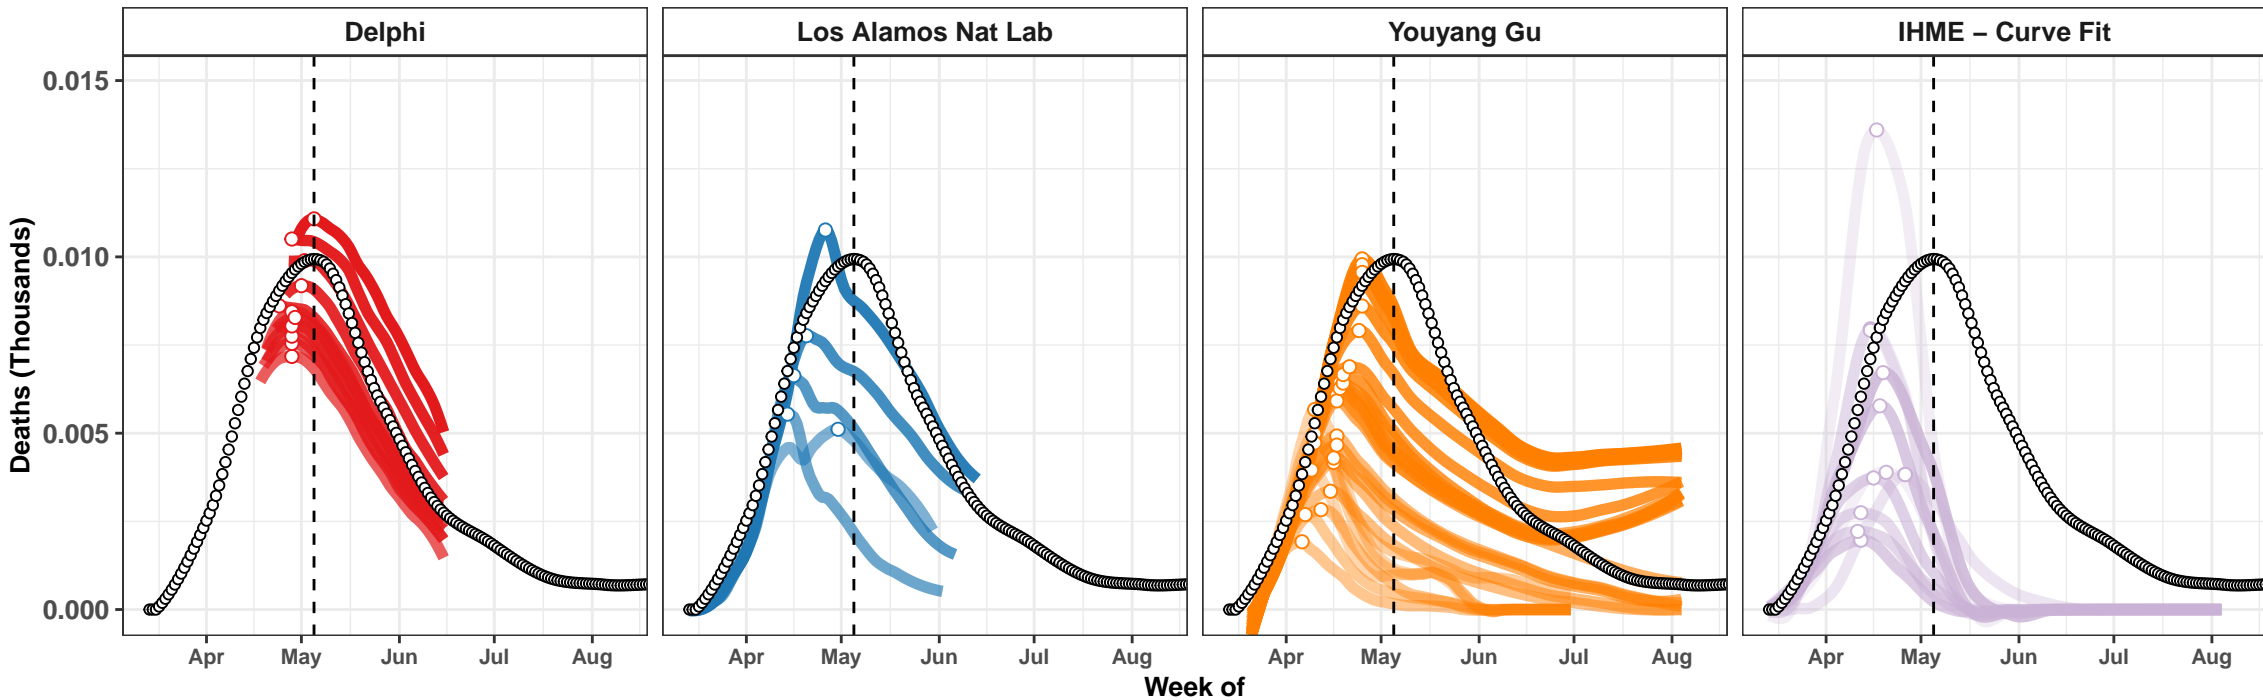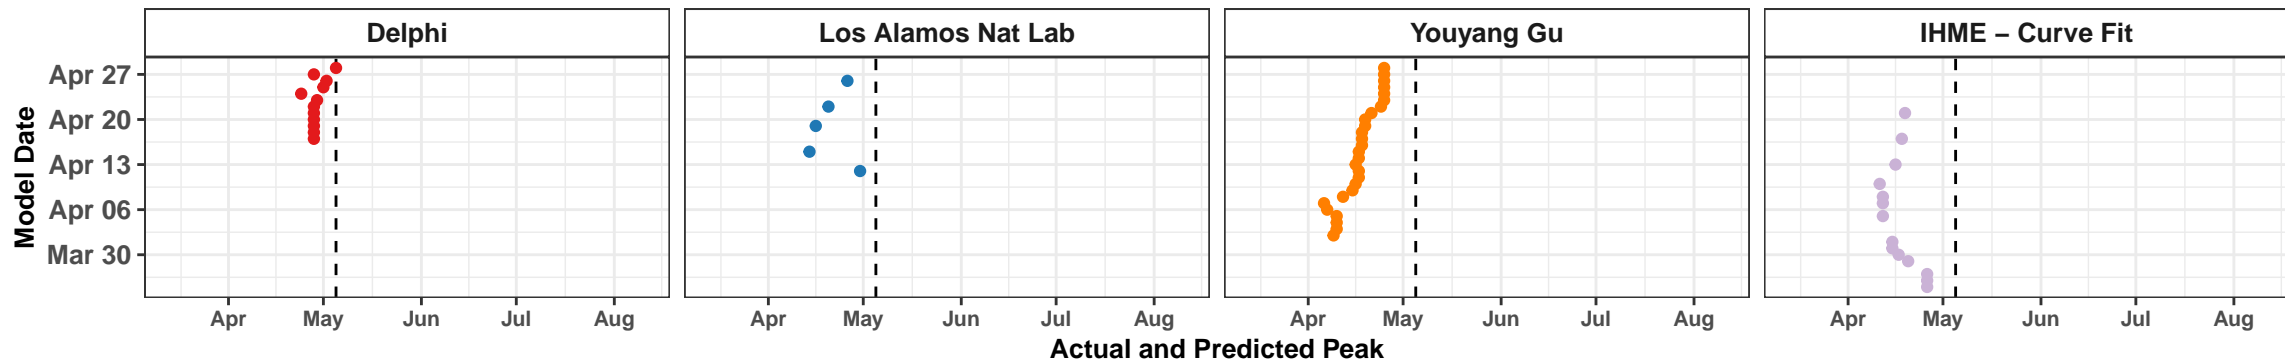

# Idaho – Smoothed Daily Deaths

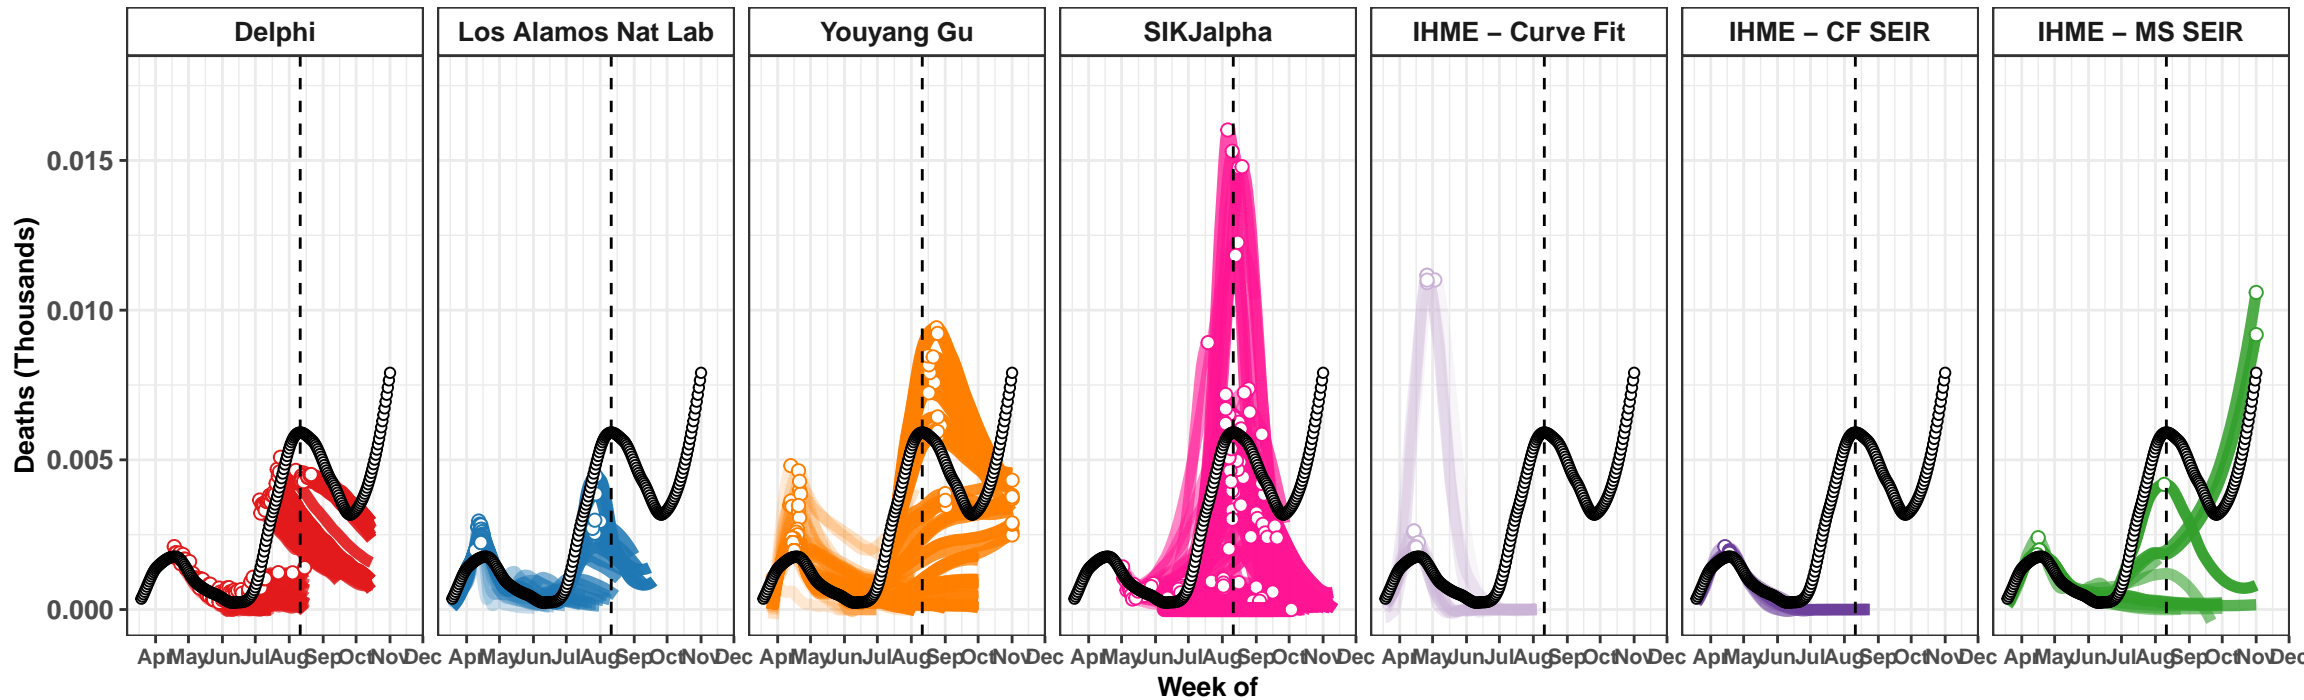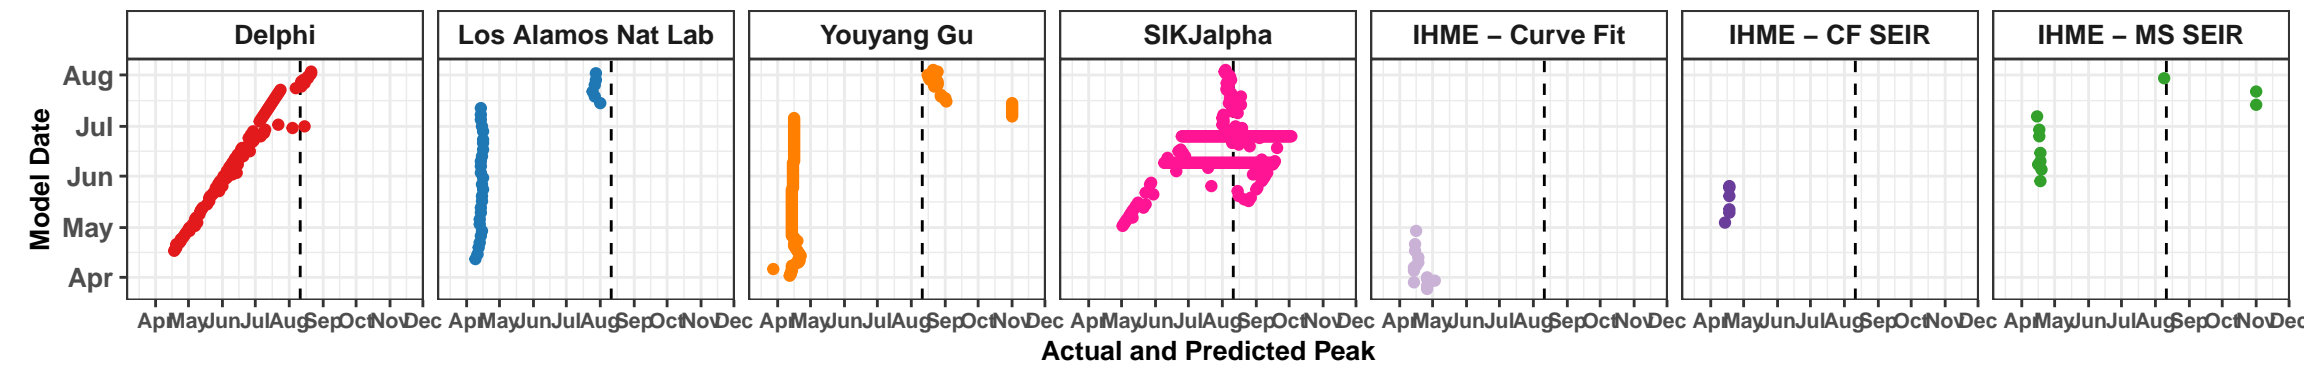



# Yemen – Smoothed Daily Deaths

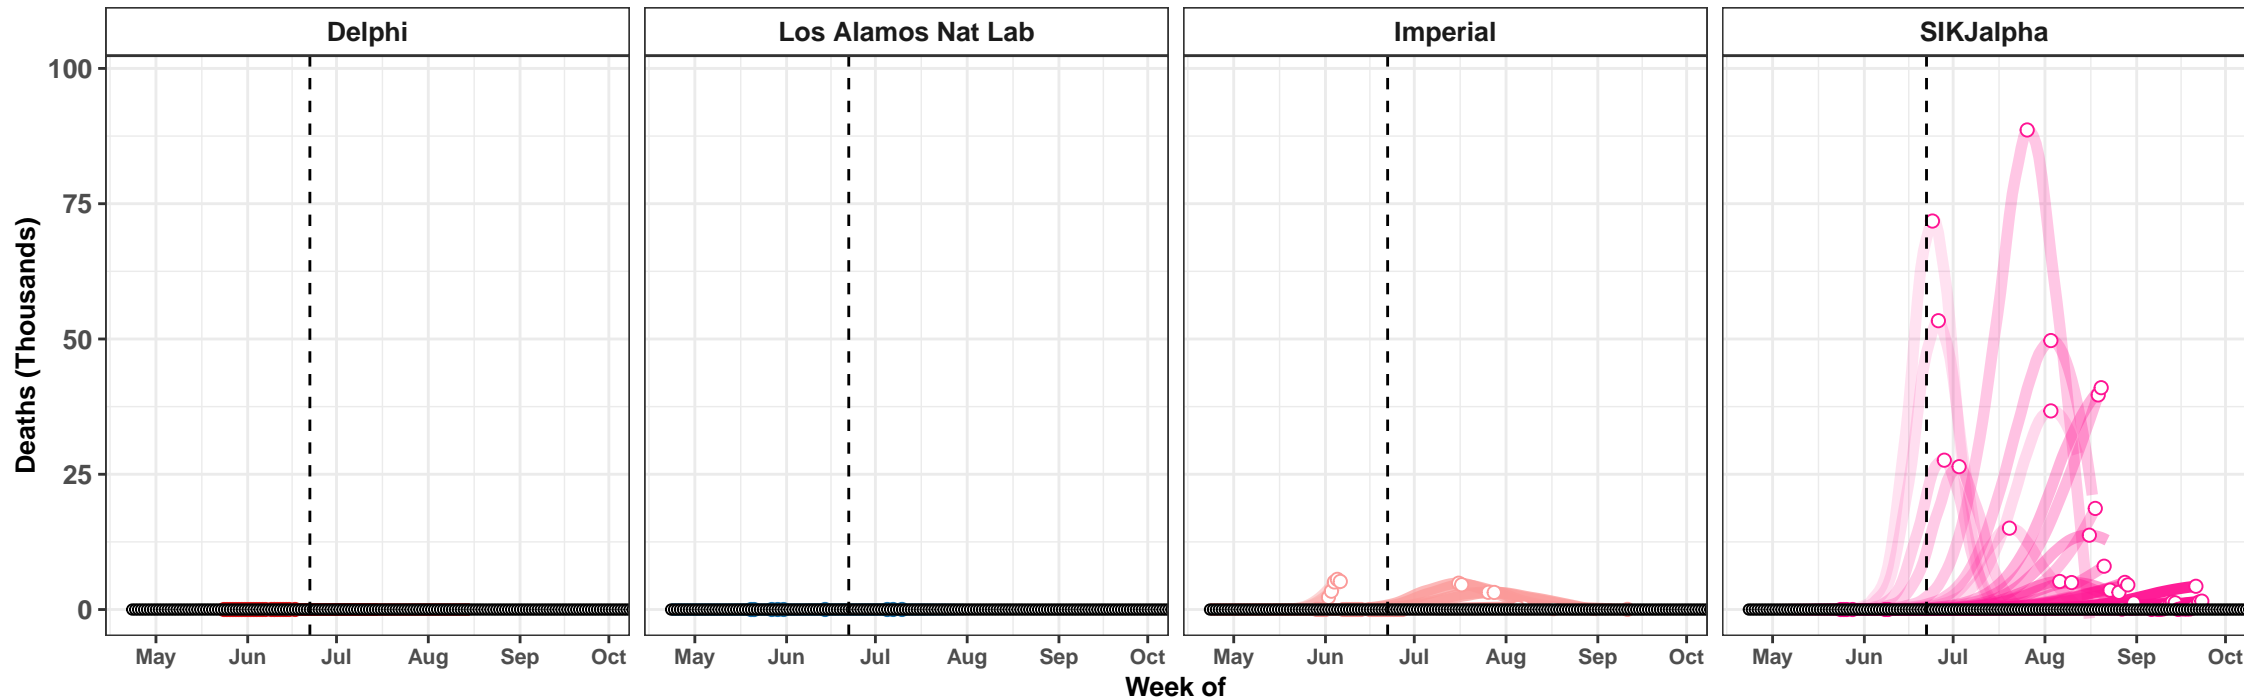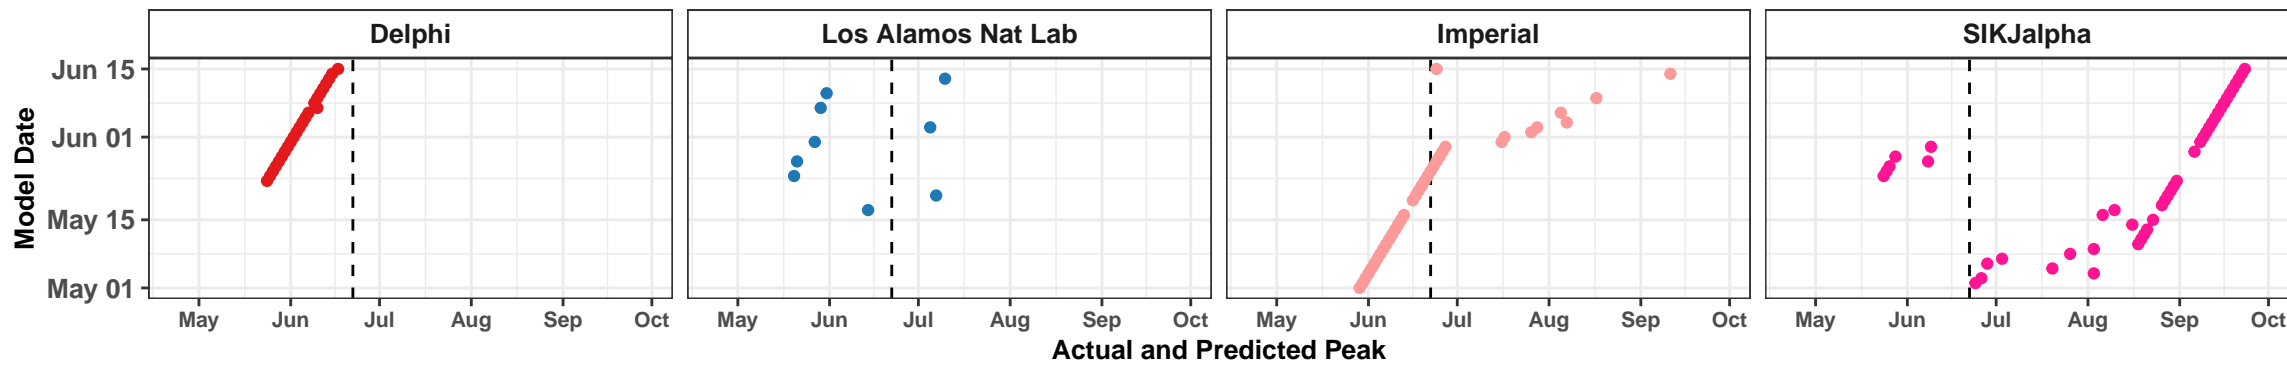

# Uzbekistan – Smoothed Daily Deaths

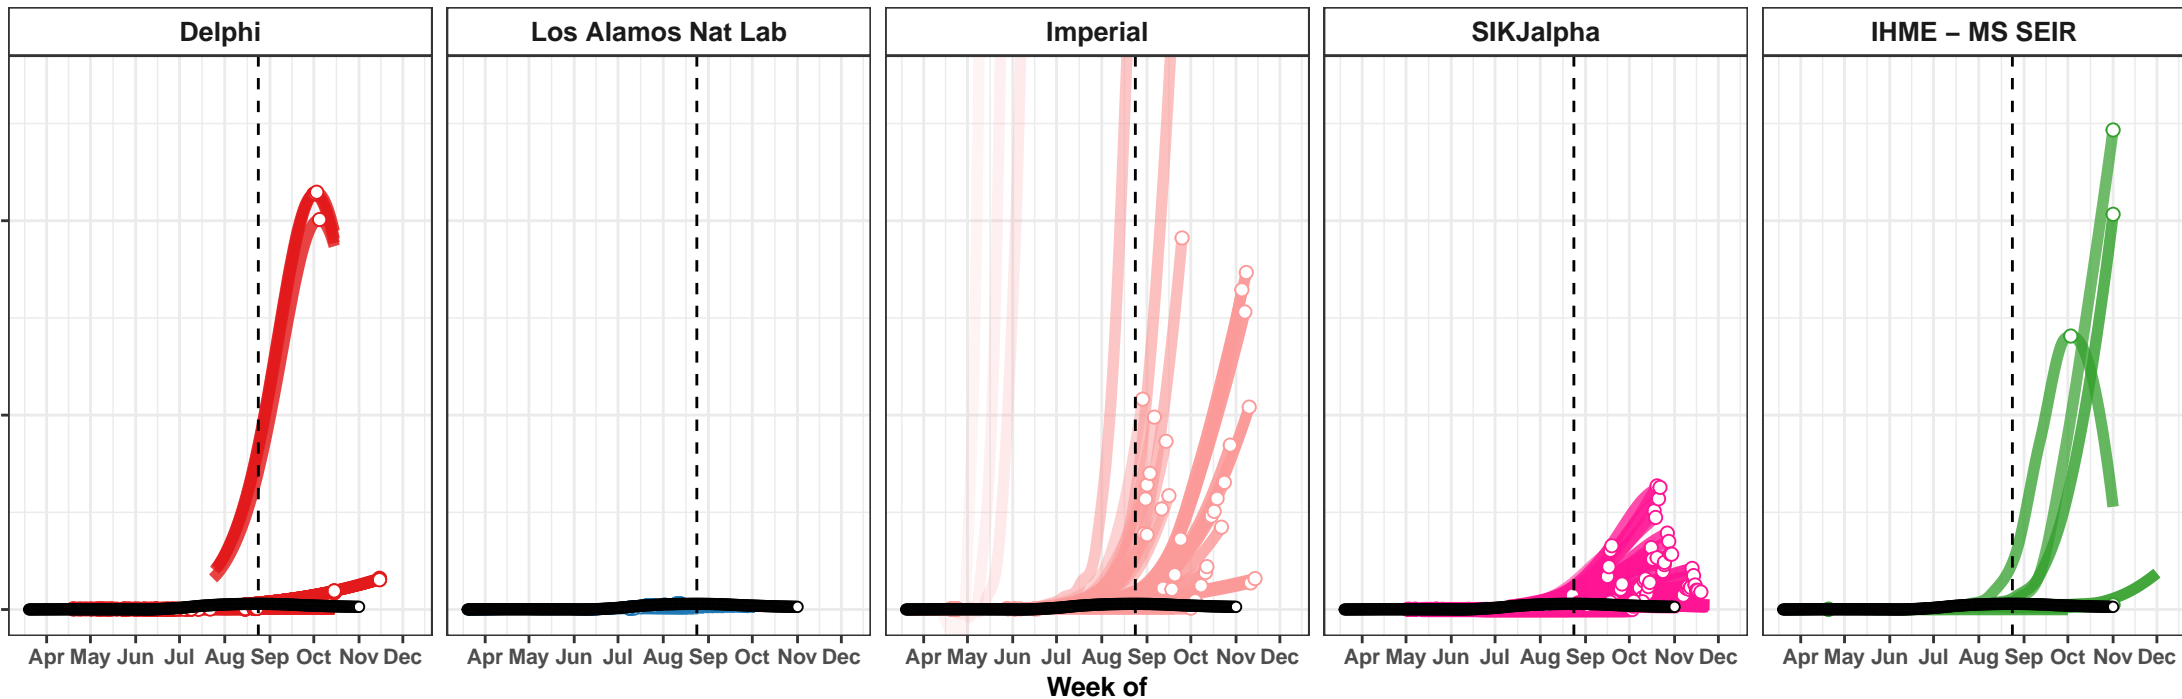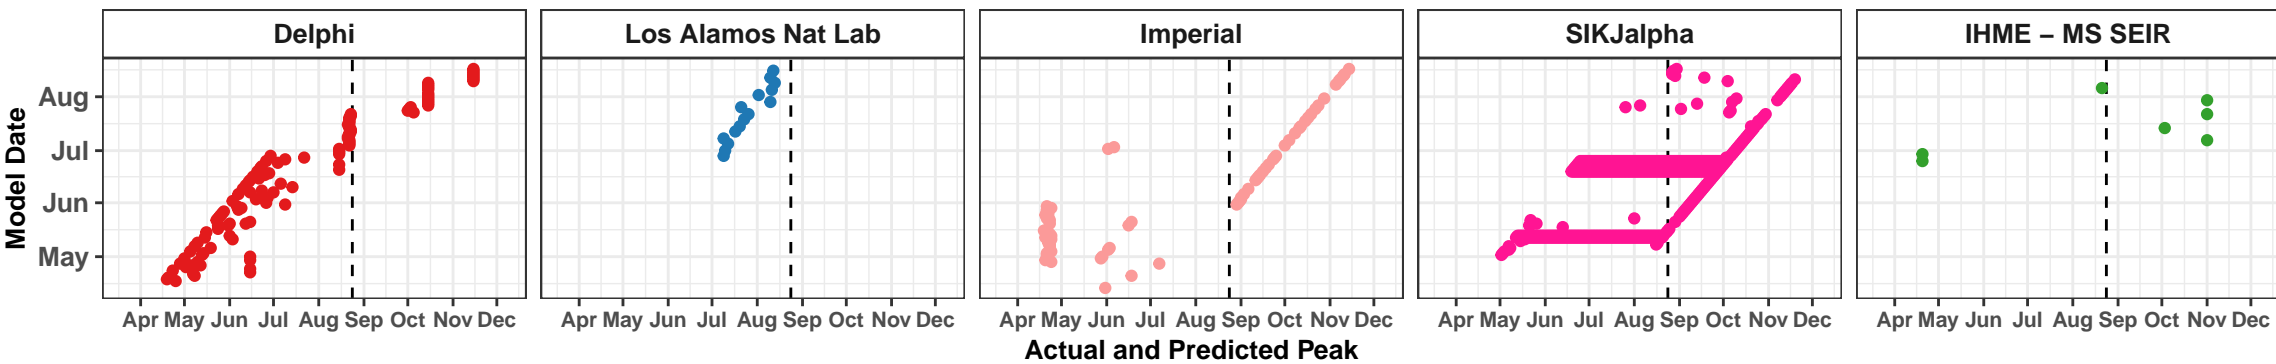

# United Arab Emirates – Smoothed Daily Deaths

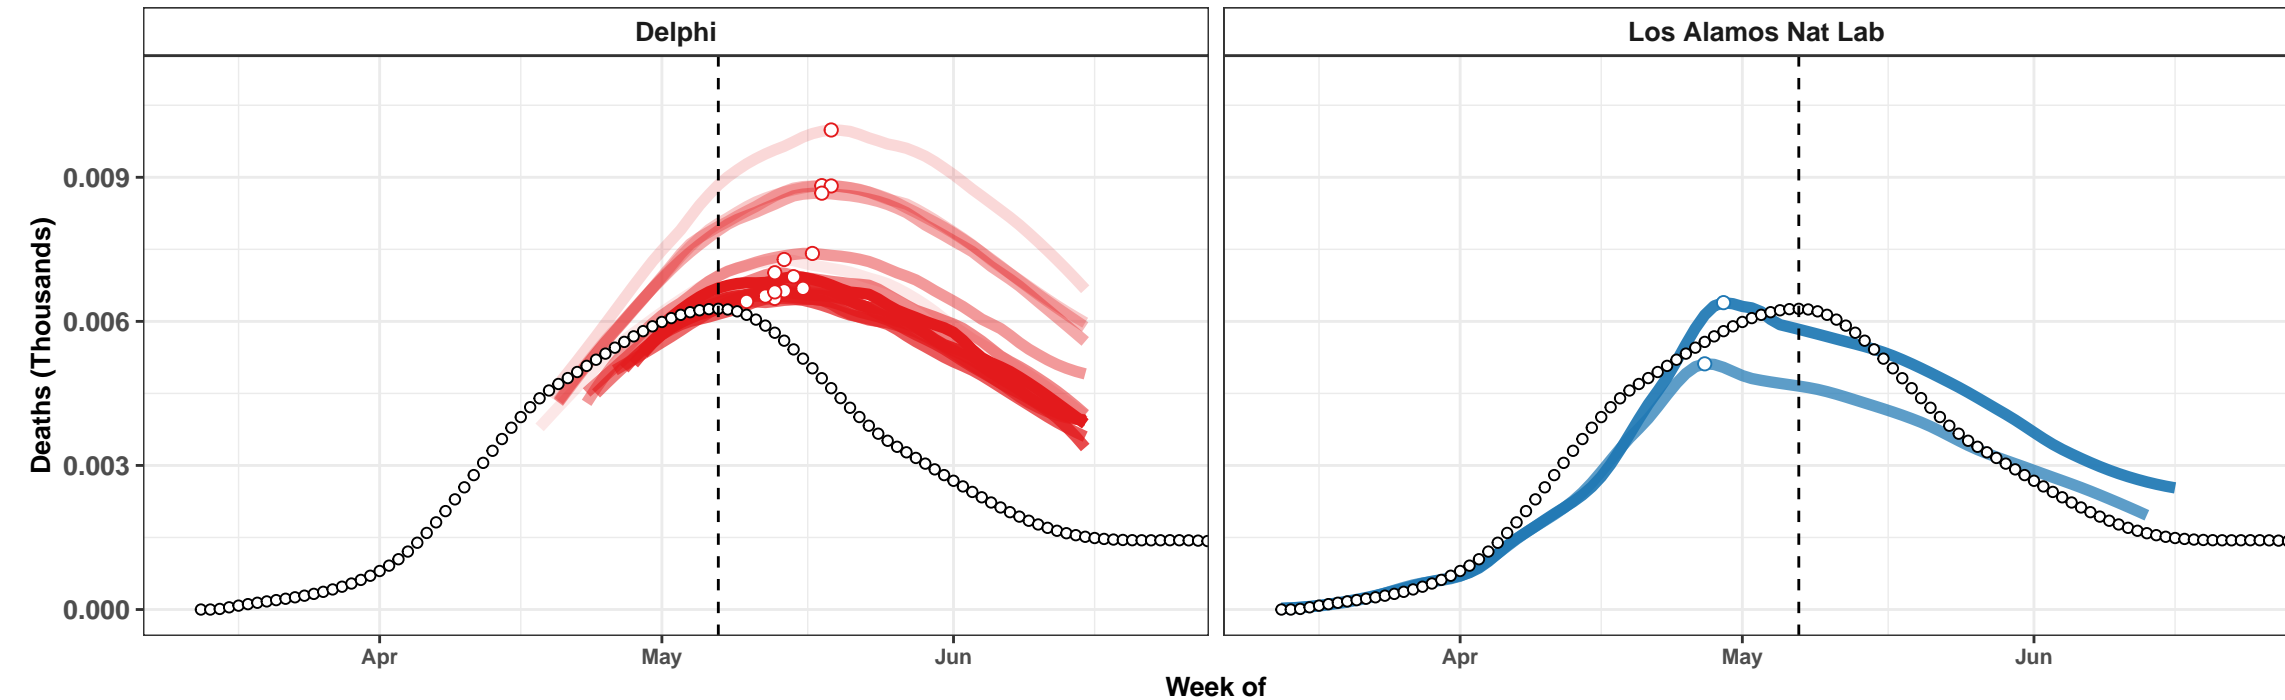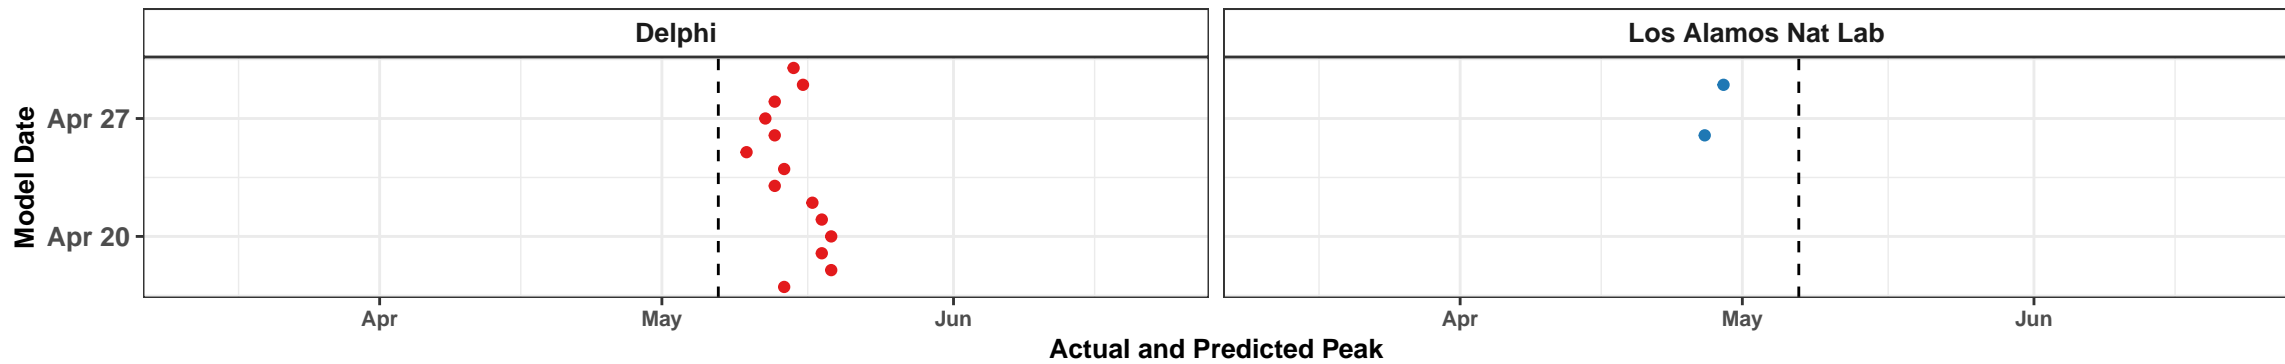

# New Hampshire – Smoothed Daily Deaths

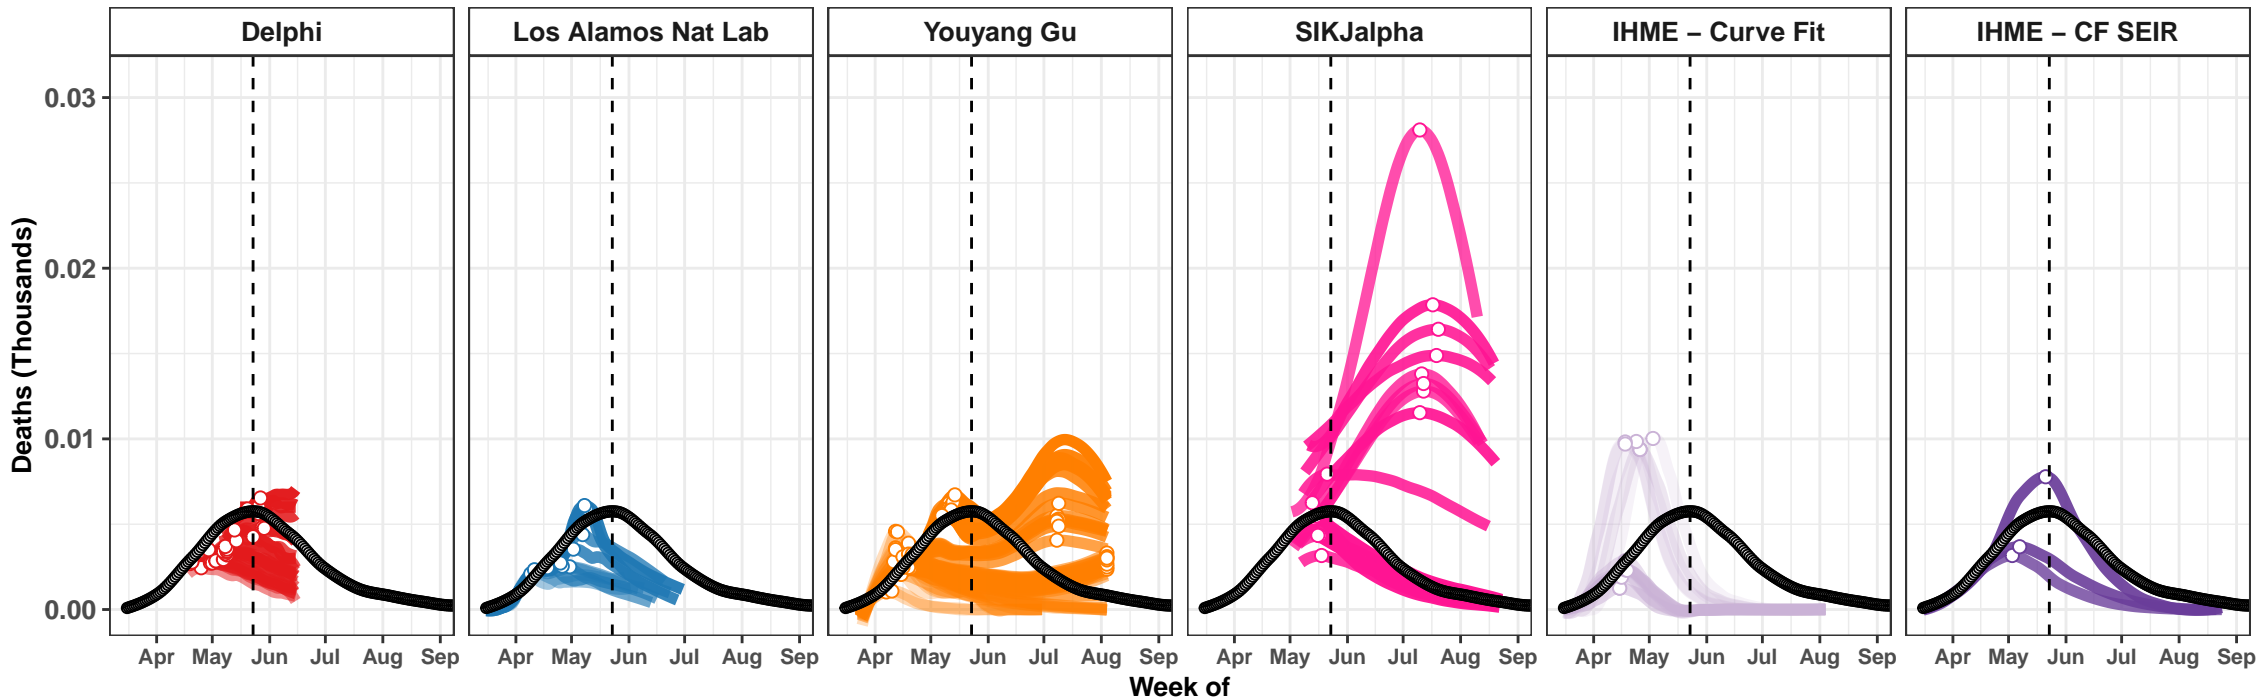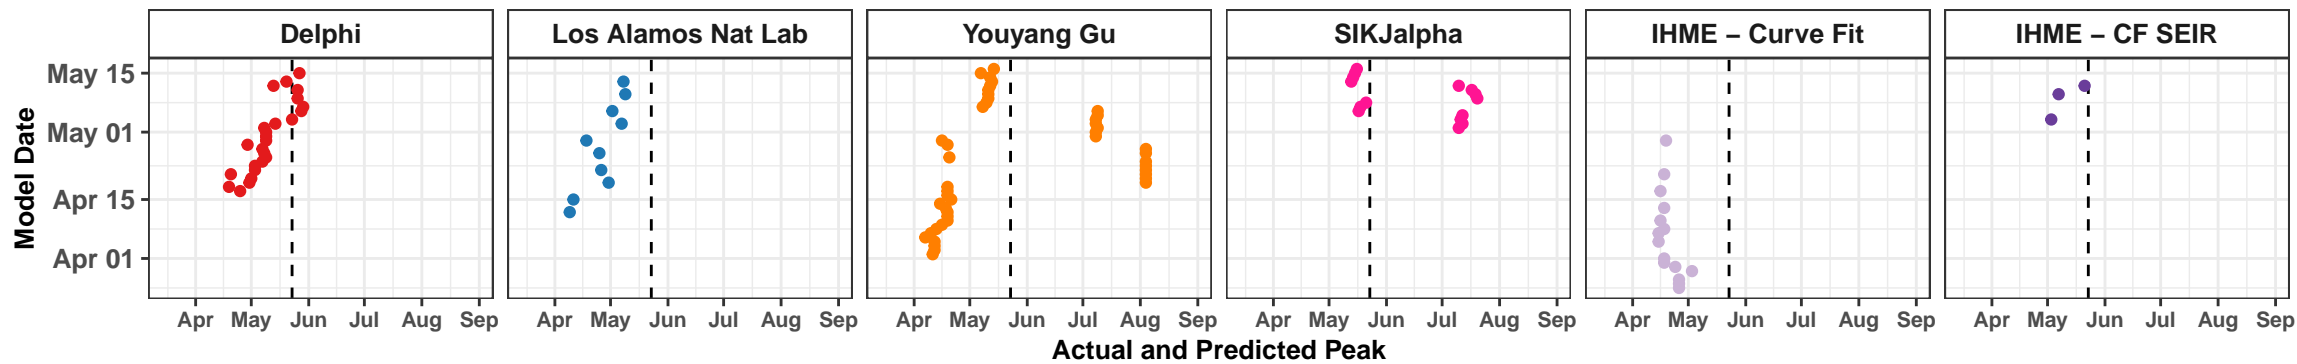

# Finland – Smoothed Daily Deaths

## Youyang Gu

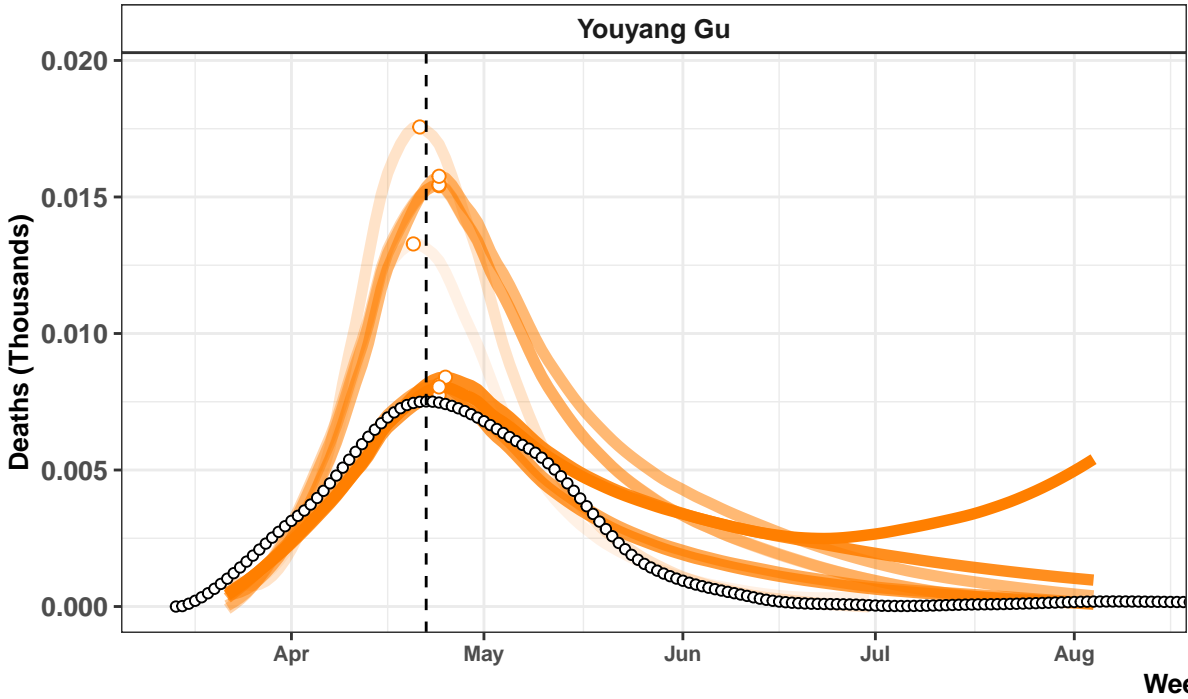

## IHME – Curve Fit

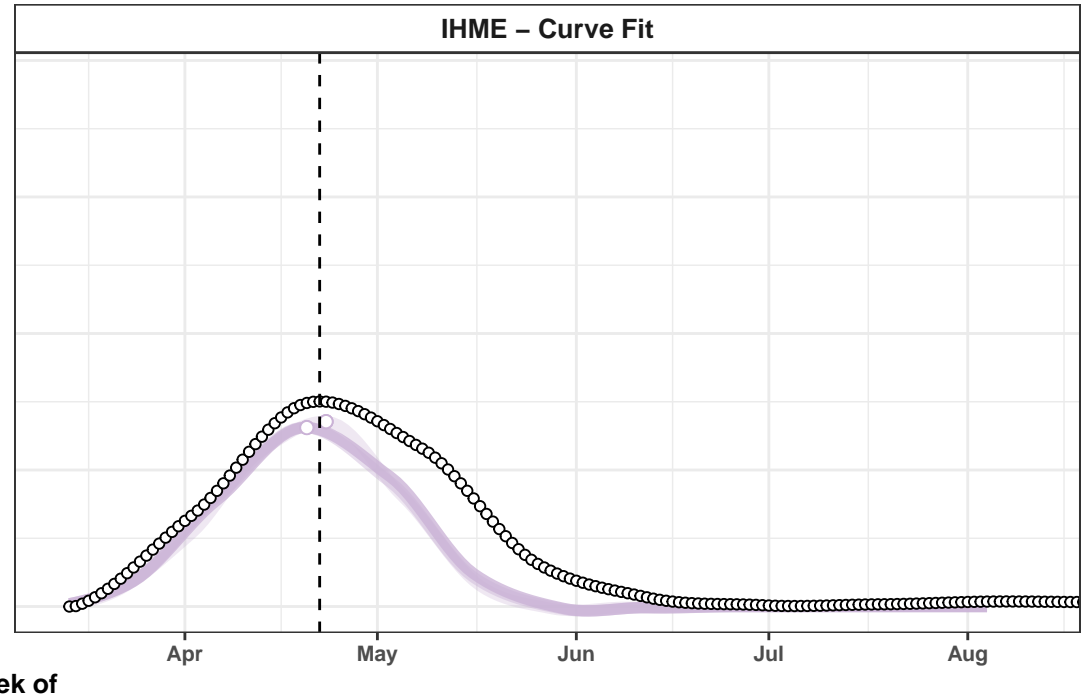

## Youyang Gu

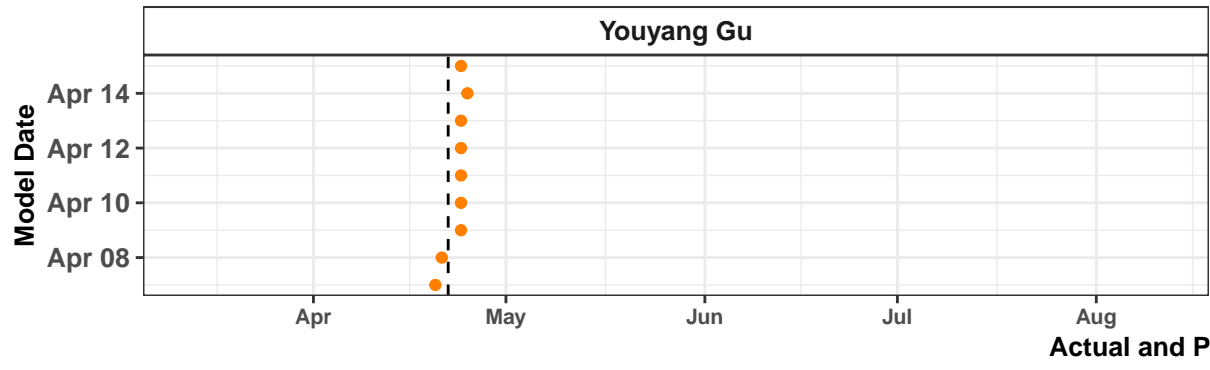

## IHME – Curve Fit

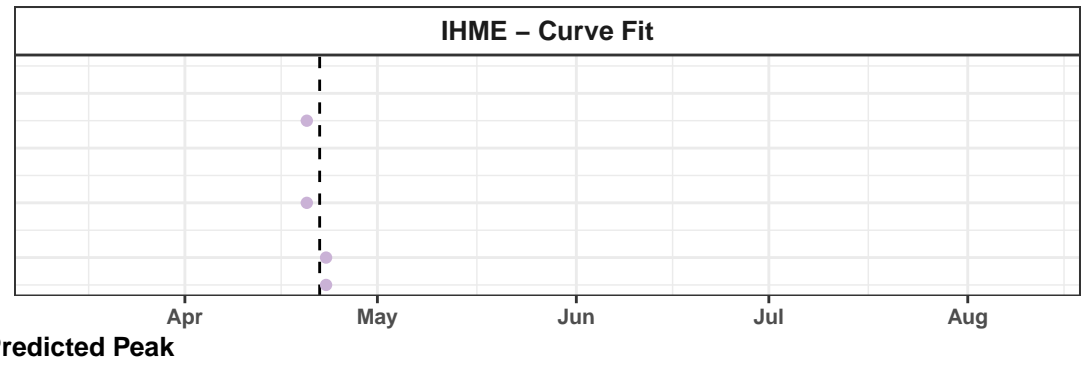

# Zambia – Smoothed Daily Deaths

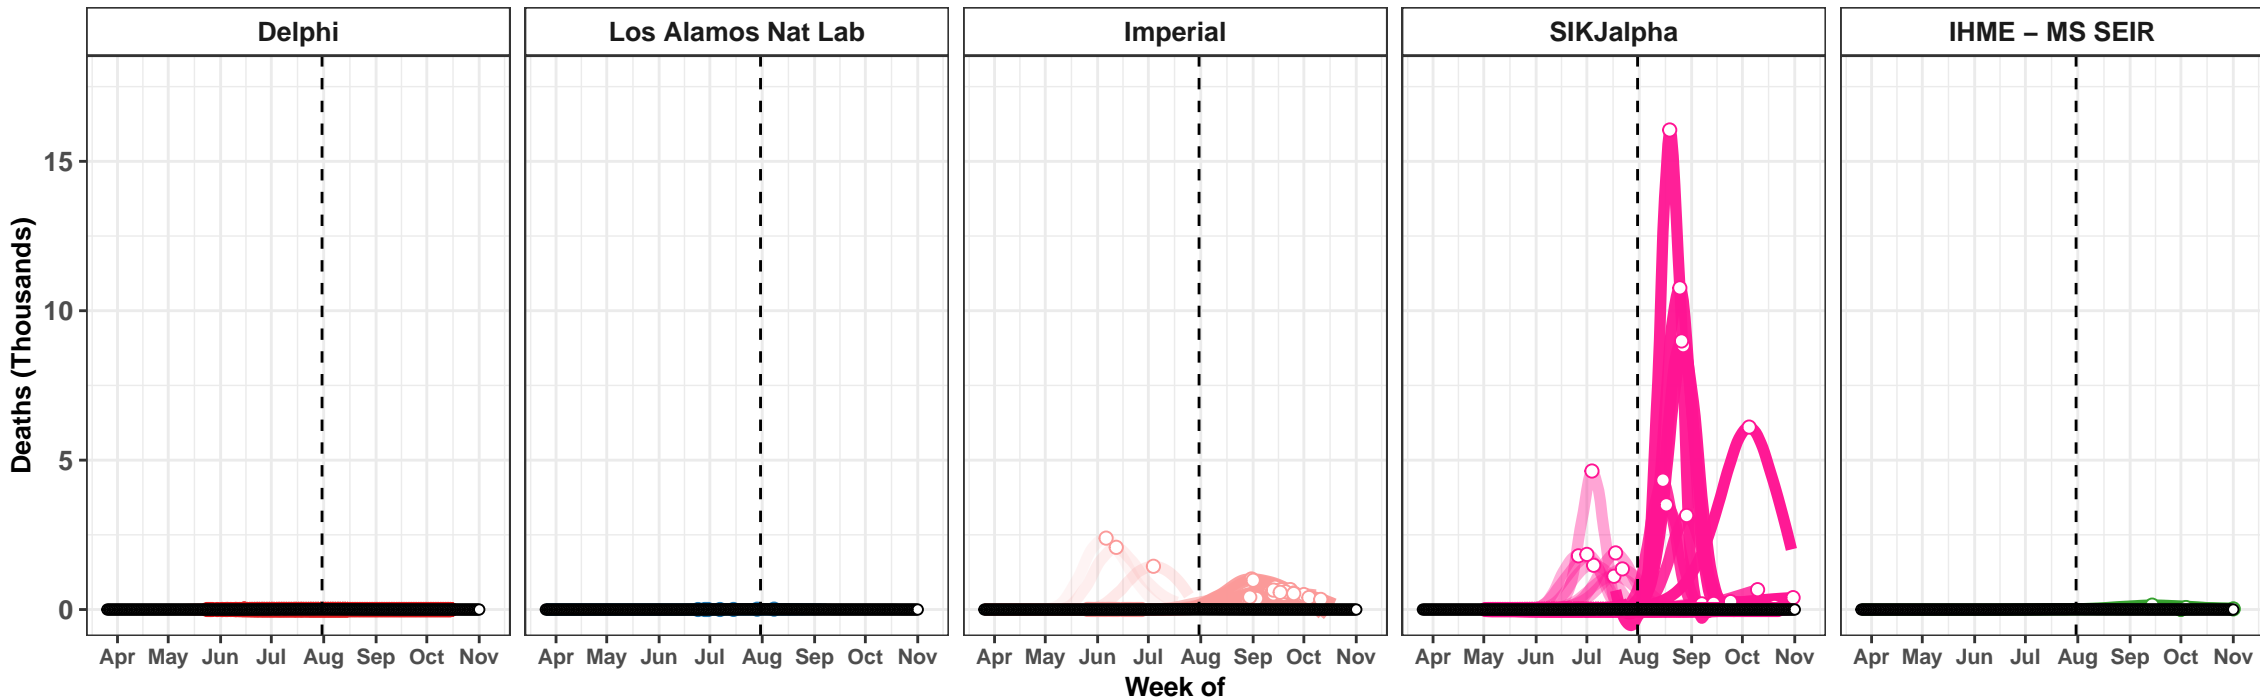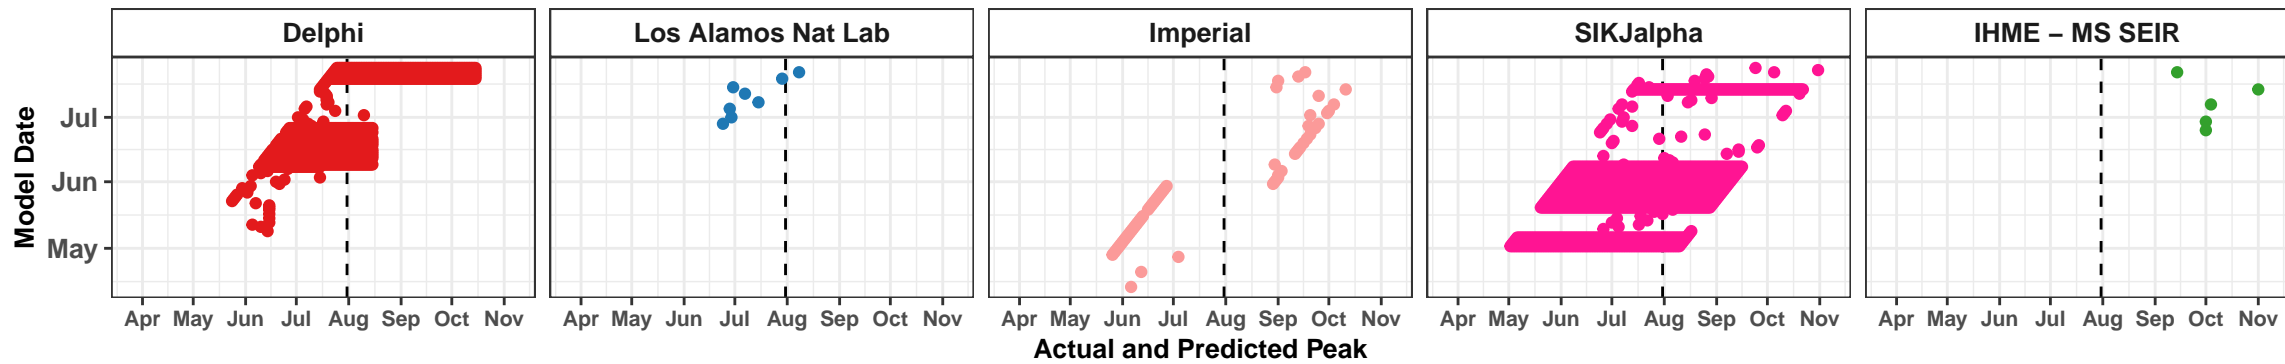

Supplement: Supplementary file [file media-3.pdf]
