# Supplementary material for: Predictive performance of international COVID-19 mortality forecasting models
Source: bioRxiv or medRxiv preprint supplement (doi:10.1101/2020.07.13.20151233), 2020-11-19

# United States

## Current Forecast

Delphi Los Alamos Nat Lab Youyang Gu Imperial IHME – MS SEIR

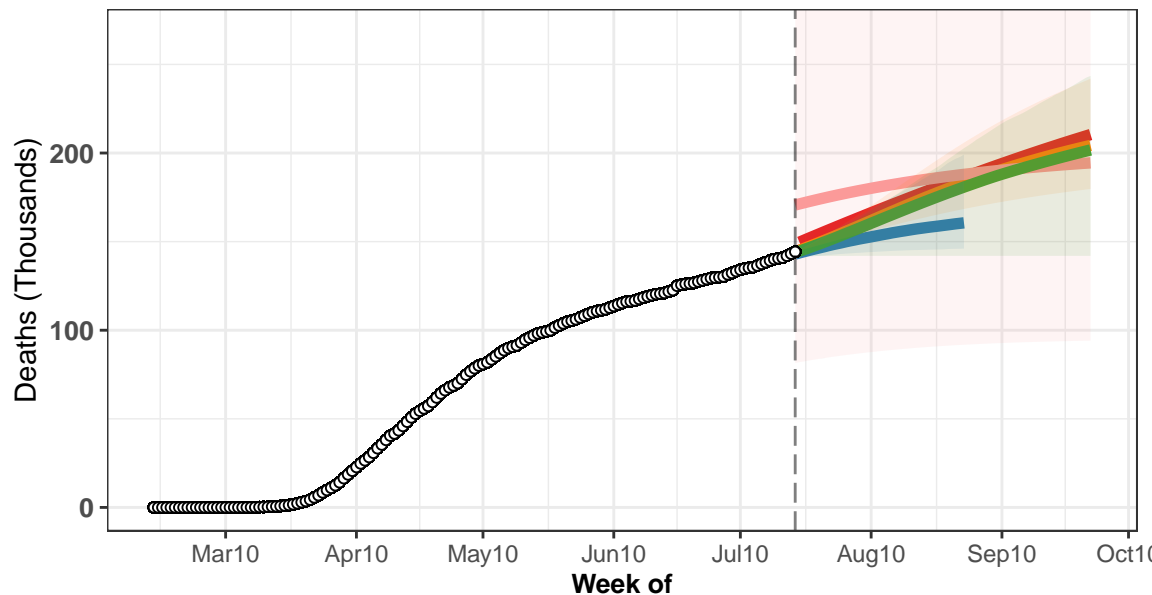

## Cumulative Out-Of-Sample Error (Post Intercept Shift)

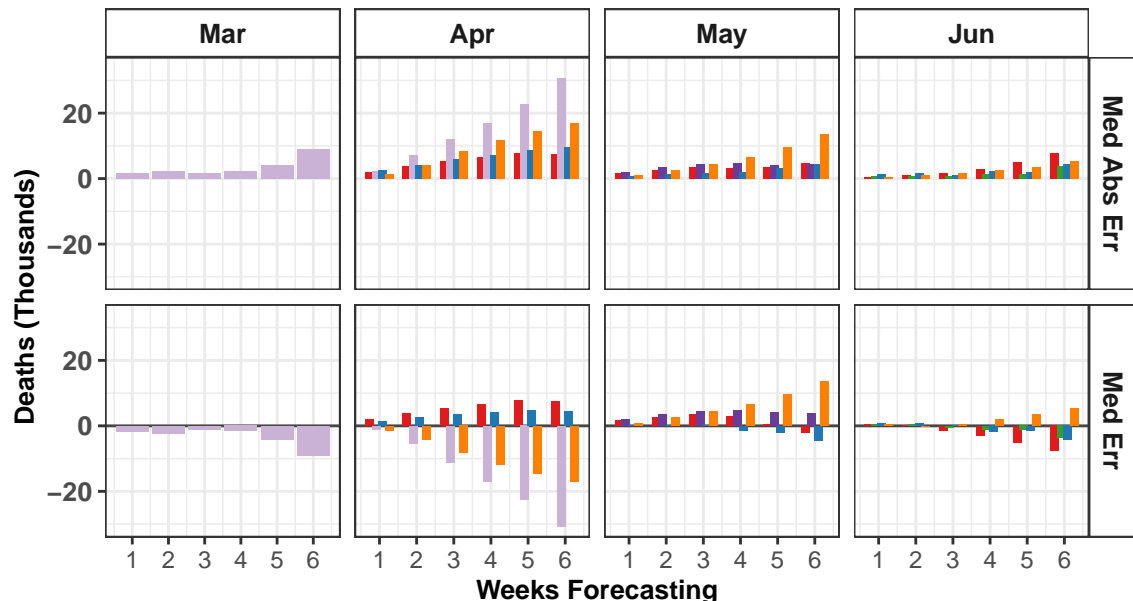

## All Model Versions

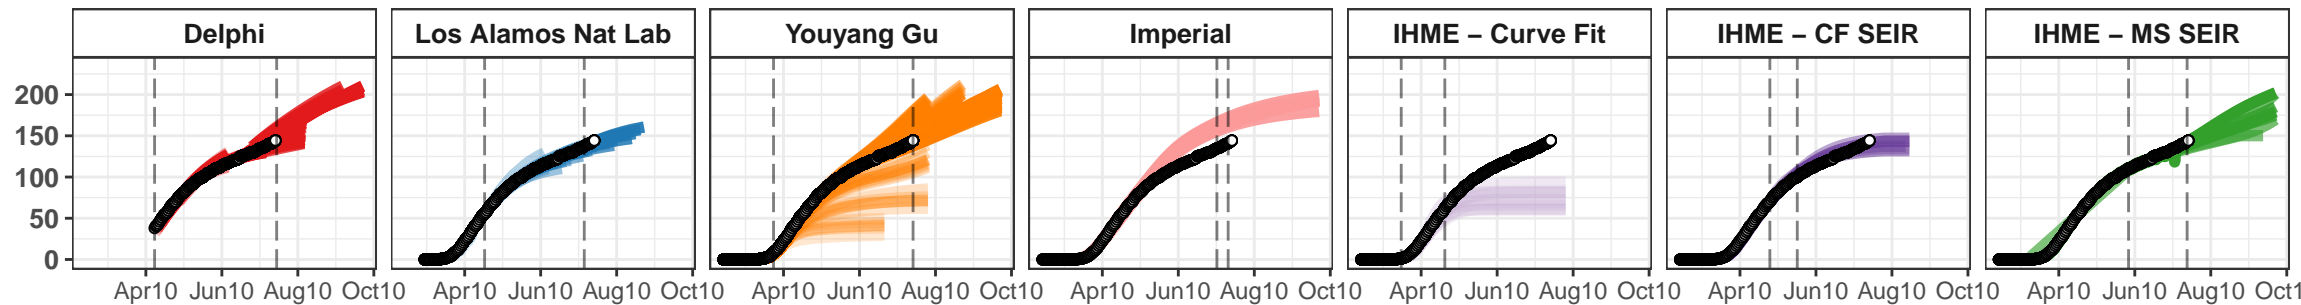

## All Cumulative Errors

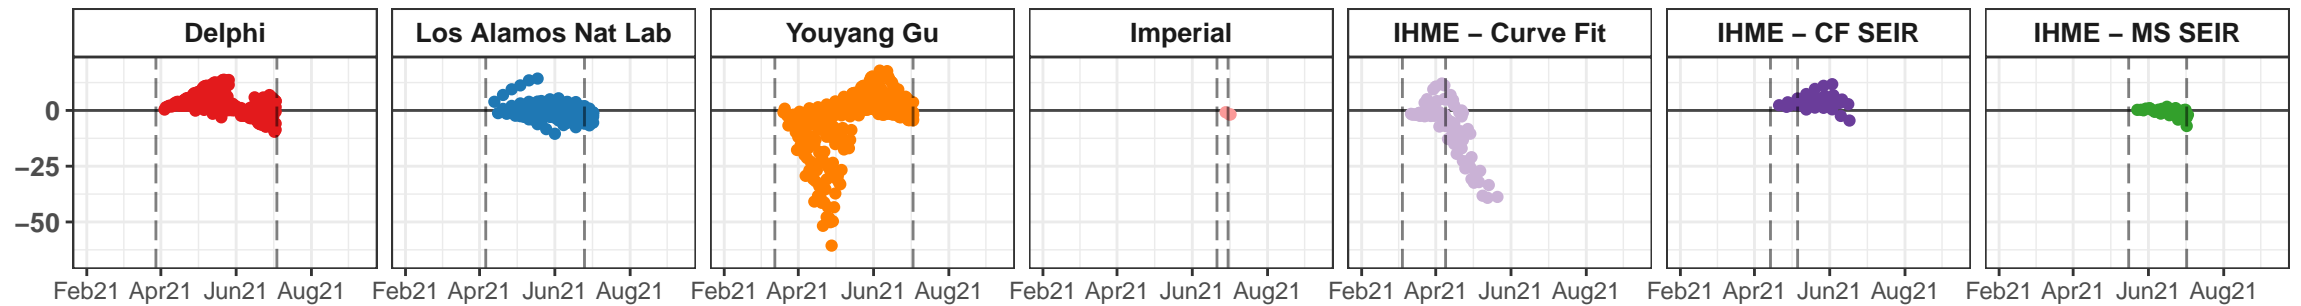

# Brazil

## Current Forecast

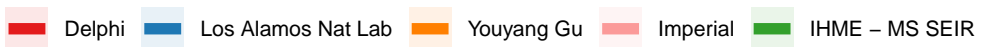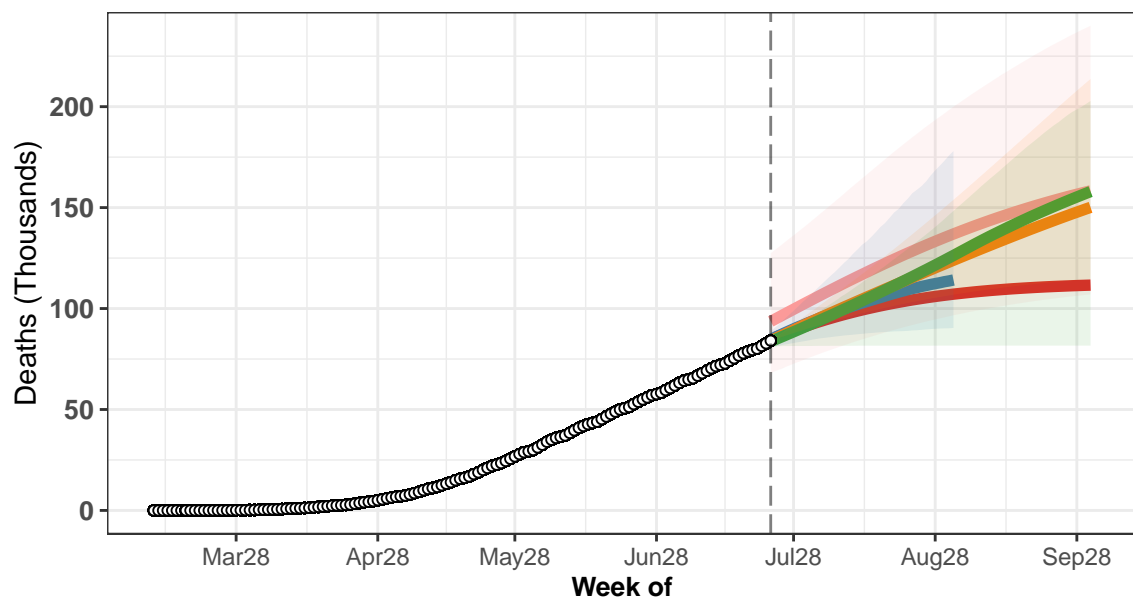

## Cumulative Out-Of-Sample Error (Post Intercept Shift)

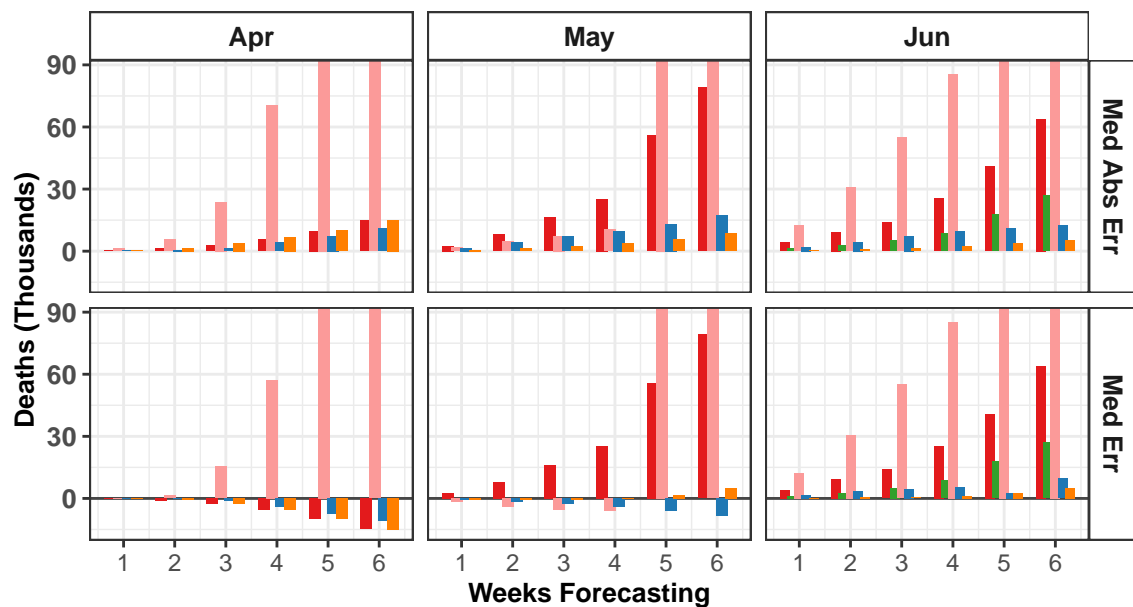

## All Model Versions

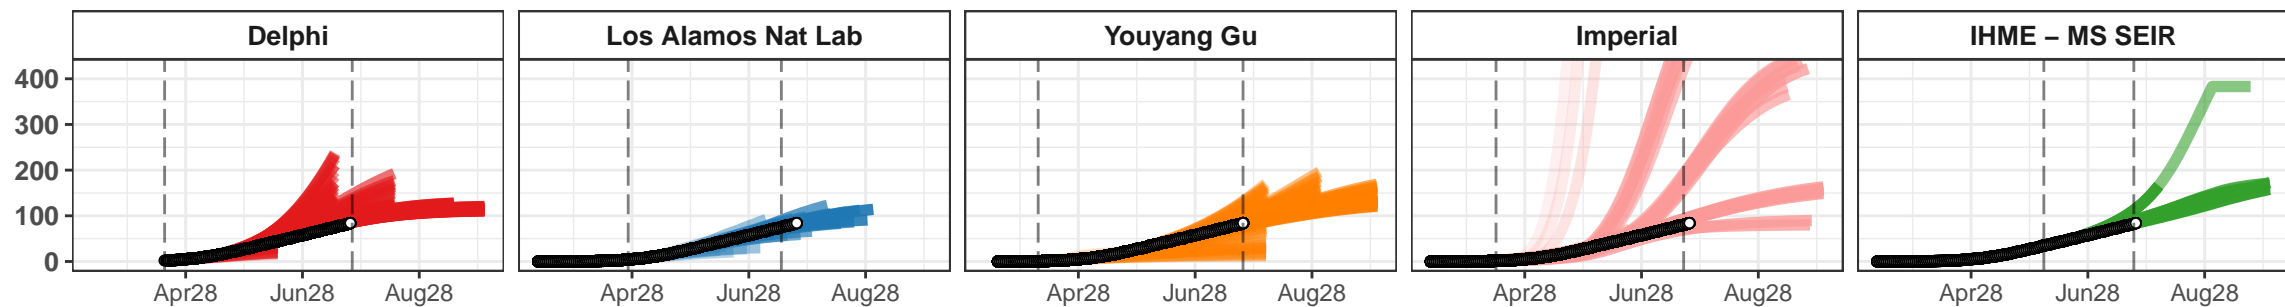

## All Cumulative Errors

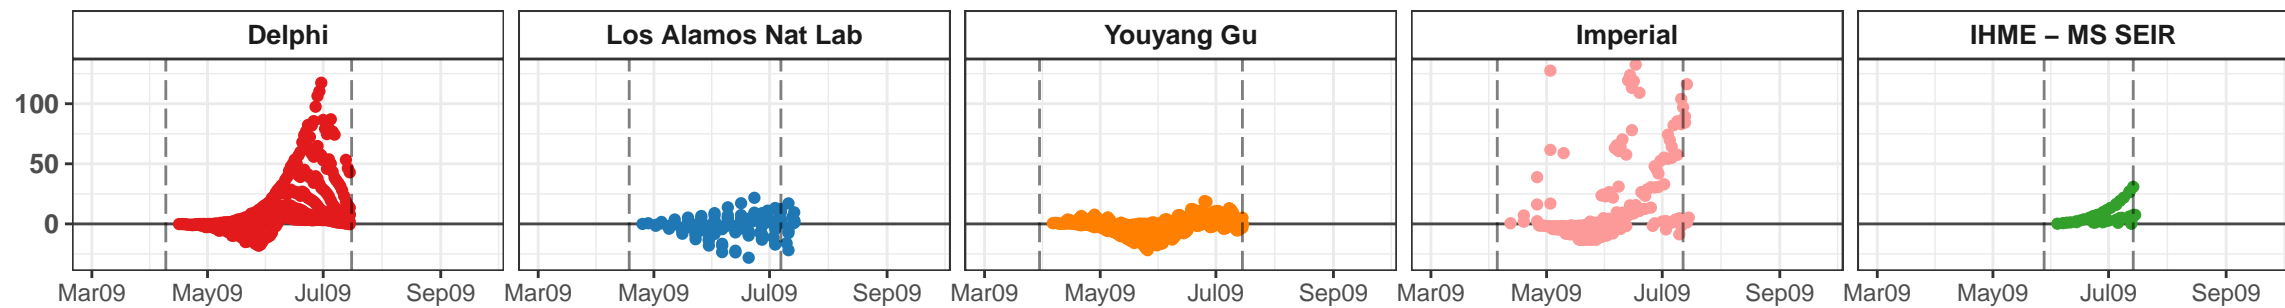

# United Kingdom

## Current Forecast

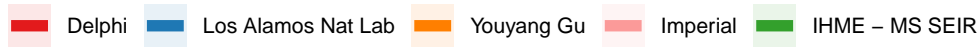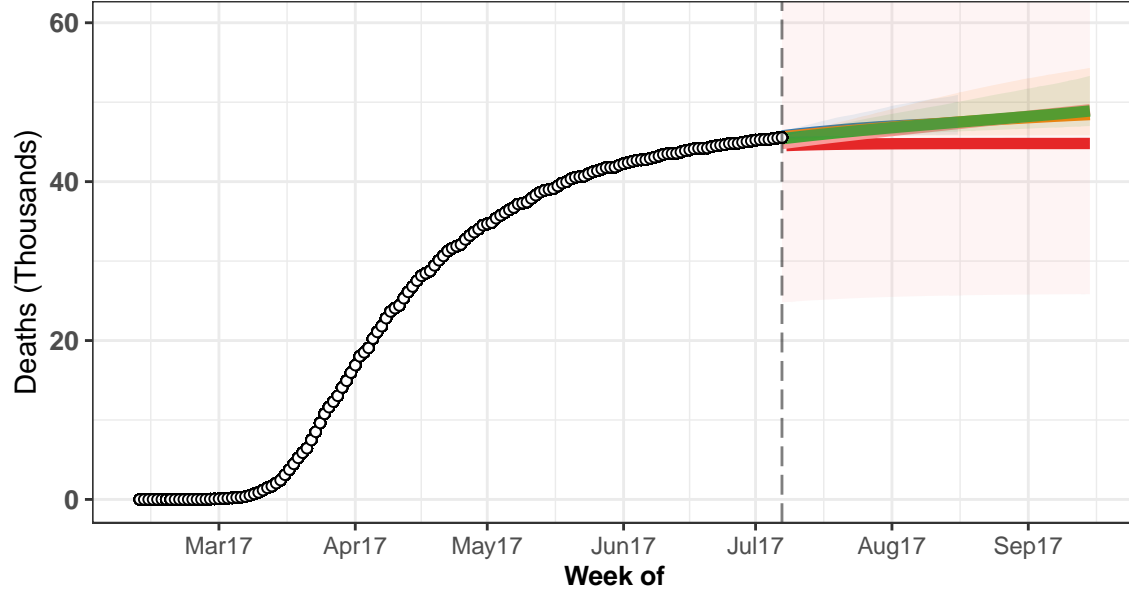

## Cumulative Out-Of-Sample Error (Post Intercept Shift)

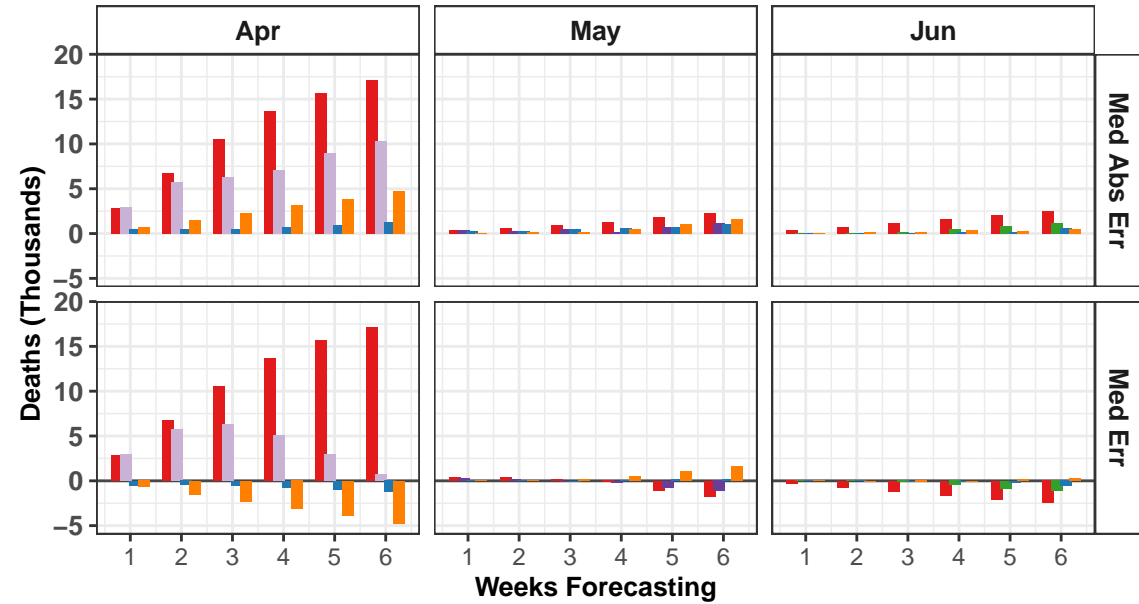

## All Model Versions

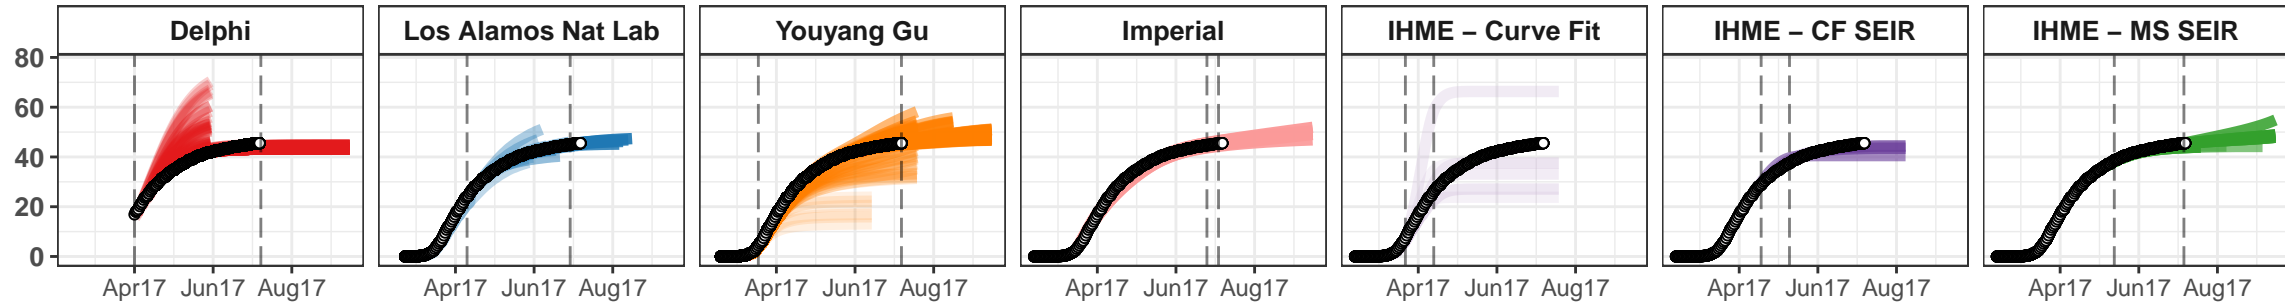

## All Cumulative Errors

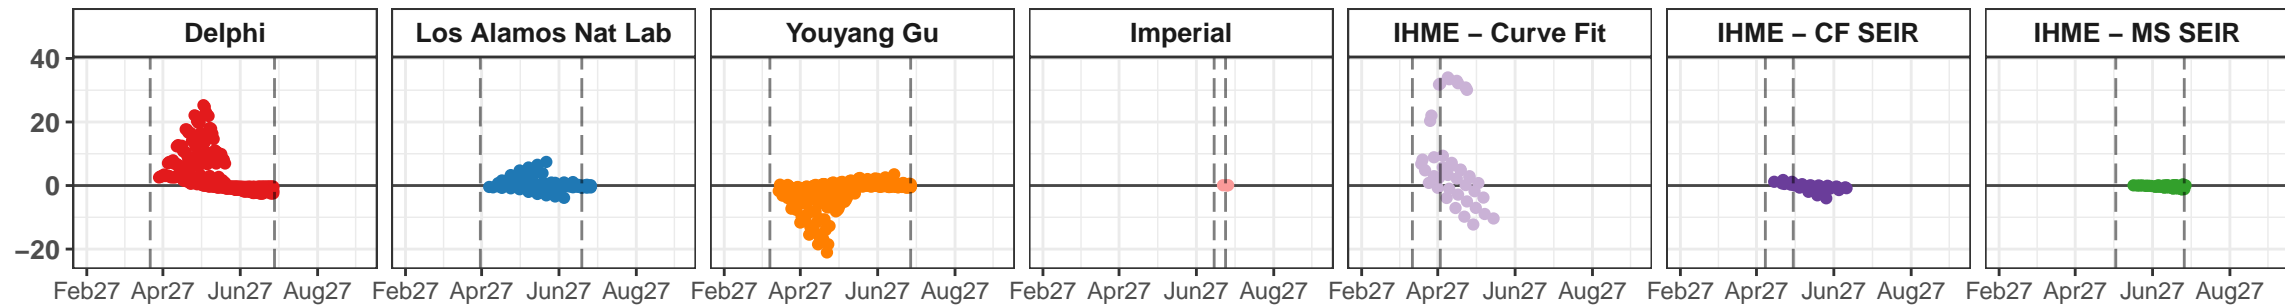

# Mexico

## Current Forecast

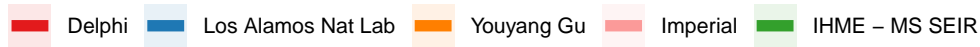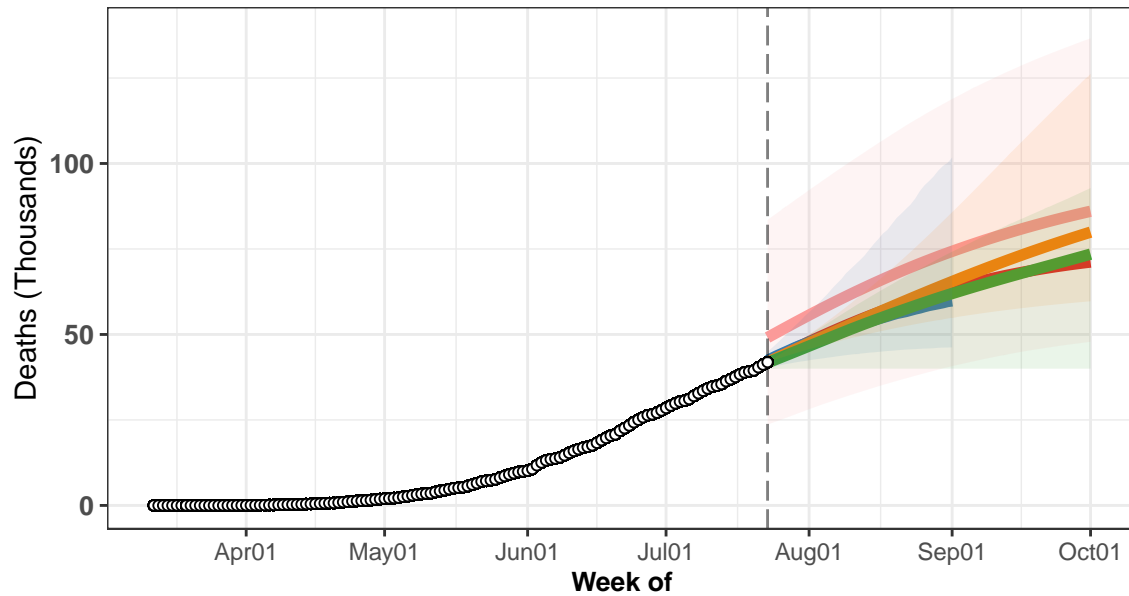

## Cumulative Out-Of-Sample Error (Post Intercept Shift)

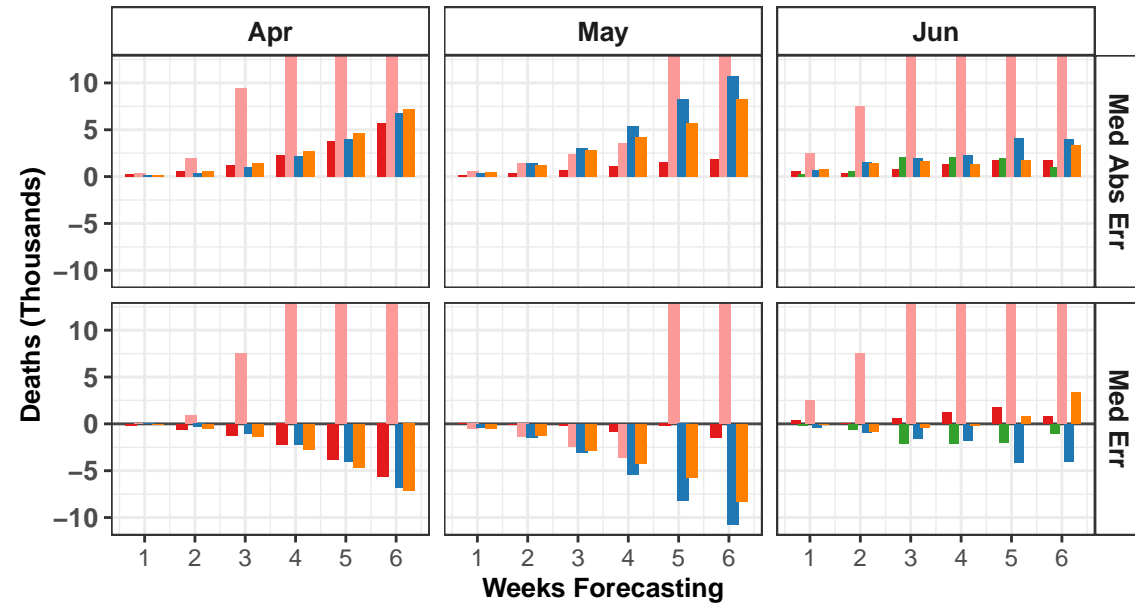

## All Model Versions

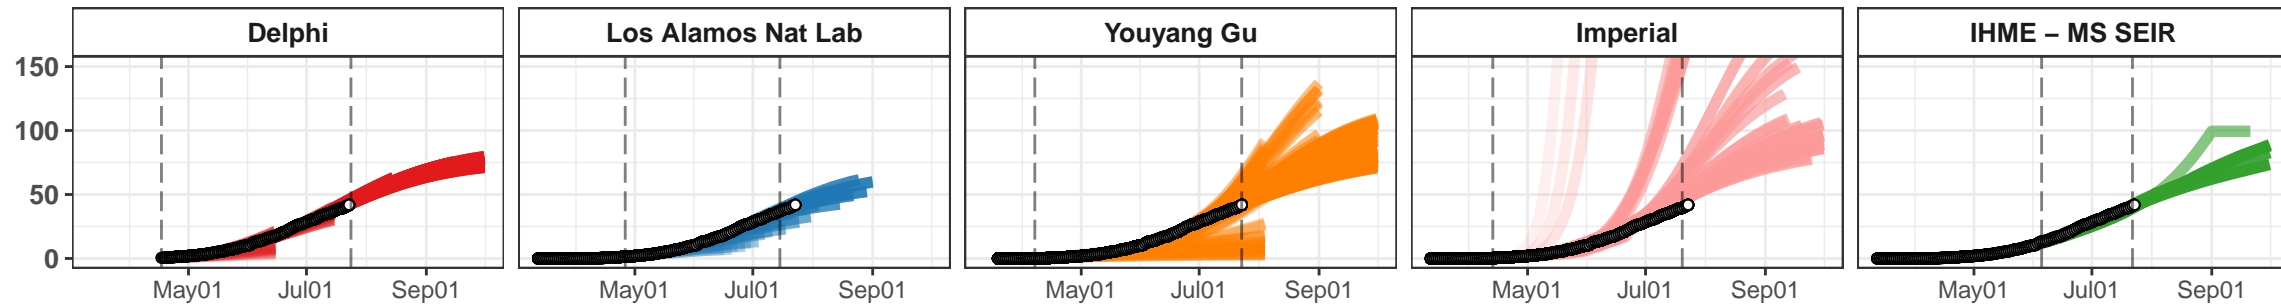

## All Cumulative Errors

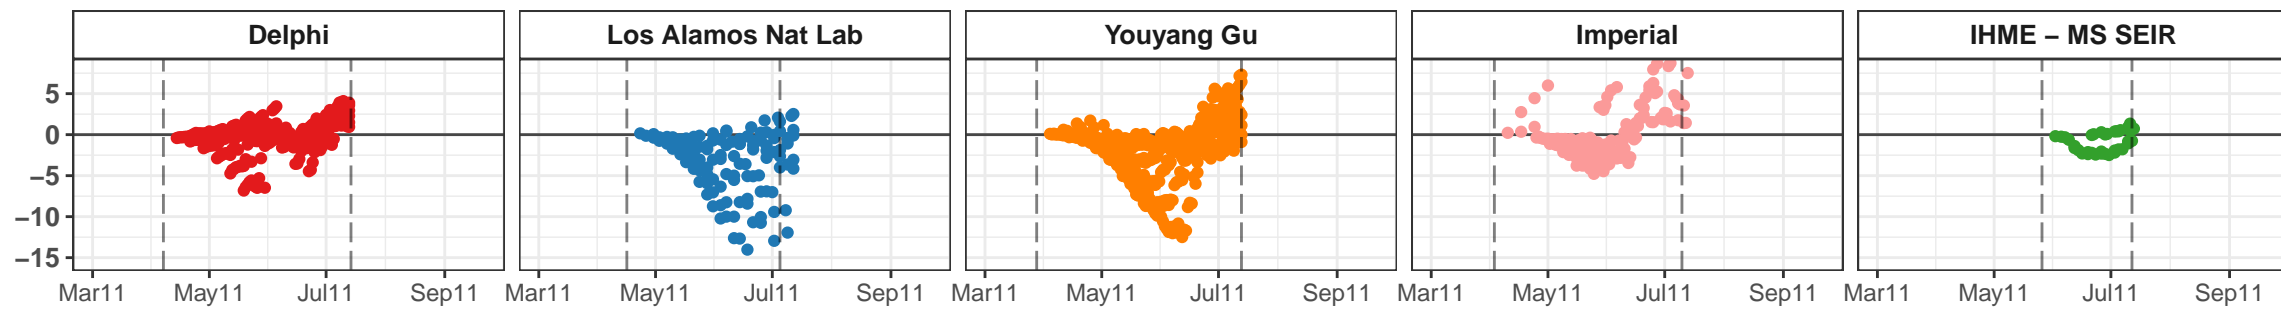



# Italy

## Current Forecast

Delphi Los Alamos Nat Lab Youyang Gu Imperial IHME – MS SEIR

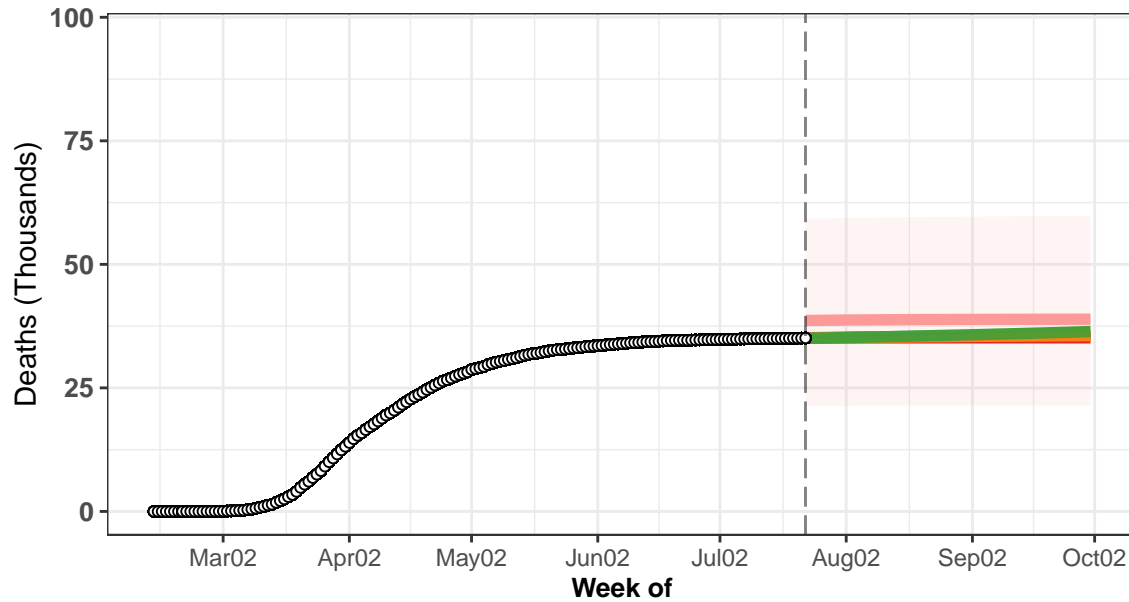

## Cumulative Out-Of-Sample Error (Post Intercept Shift)

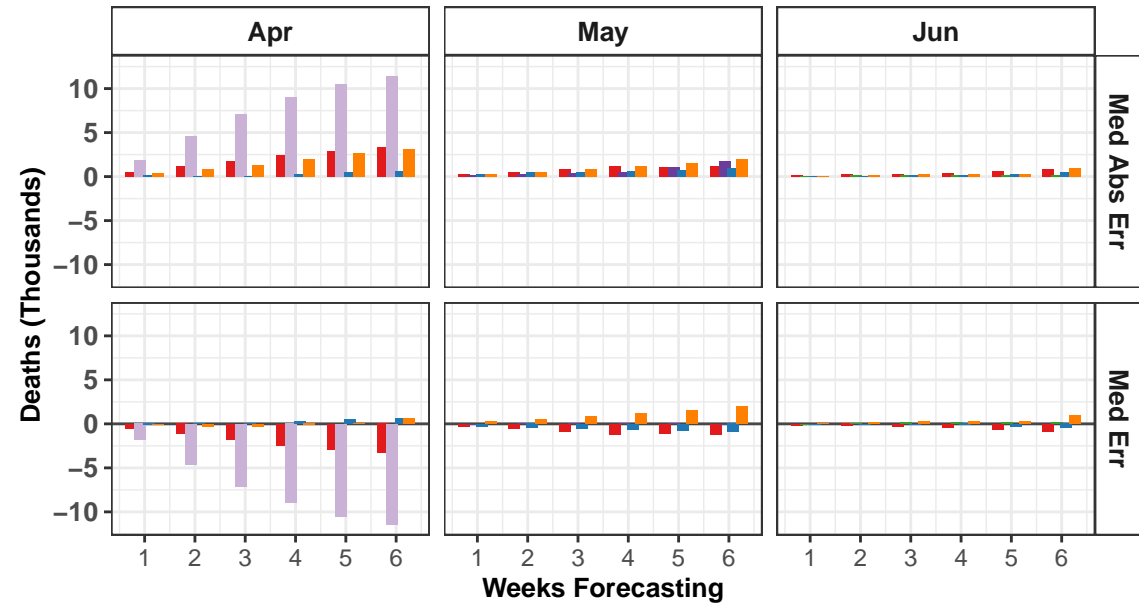

## All Model Versions

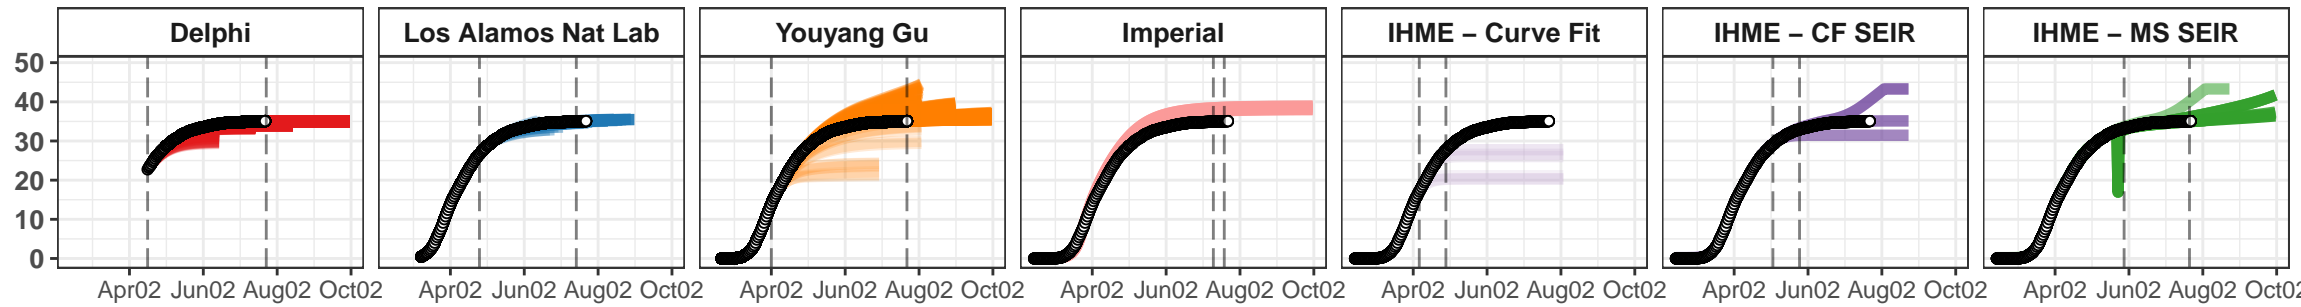

## All Cumulative Errors

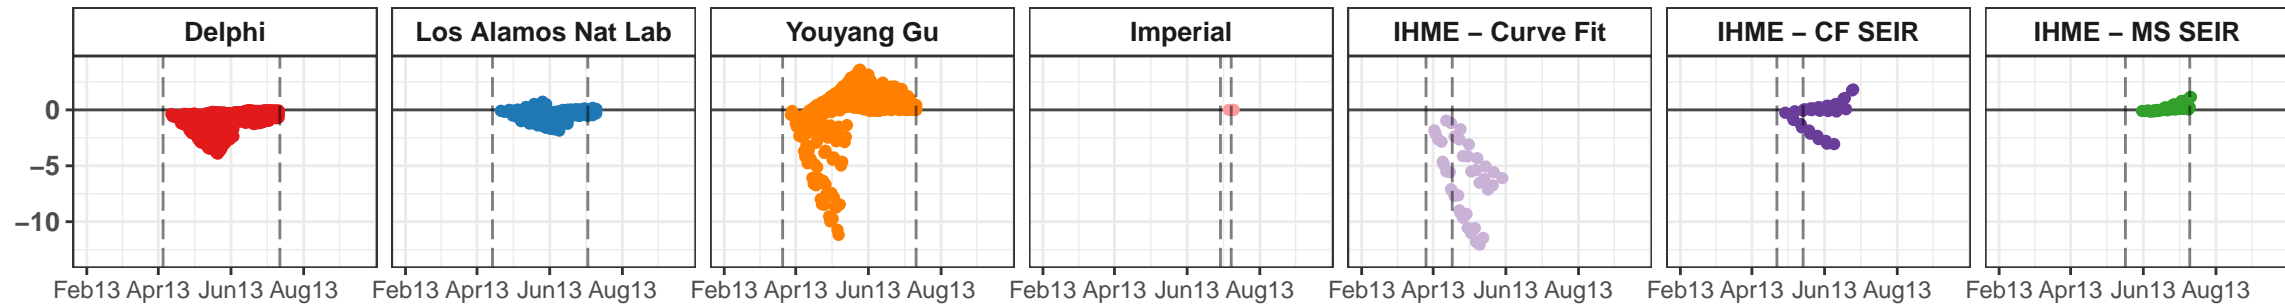

# New York

## Current Forecast

Delphi Los Alamos Nat Lab Youyang Gu IHME - MS SEIR JHU NYT

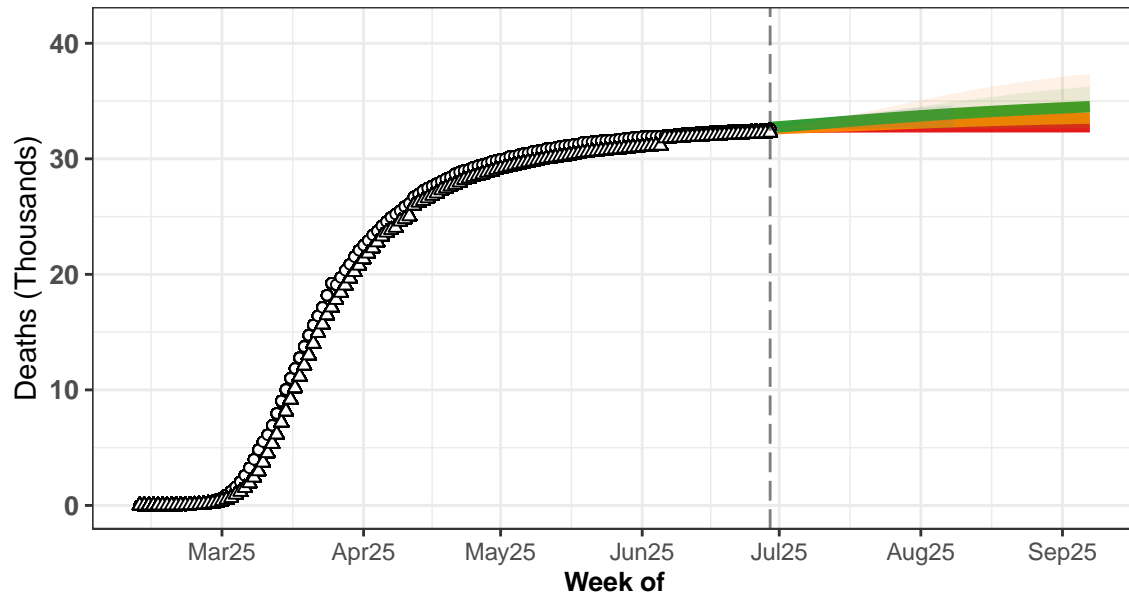

## Cumulative Out-Of-Sample Error (Post Intercept Shift)

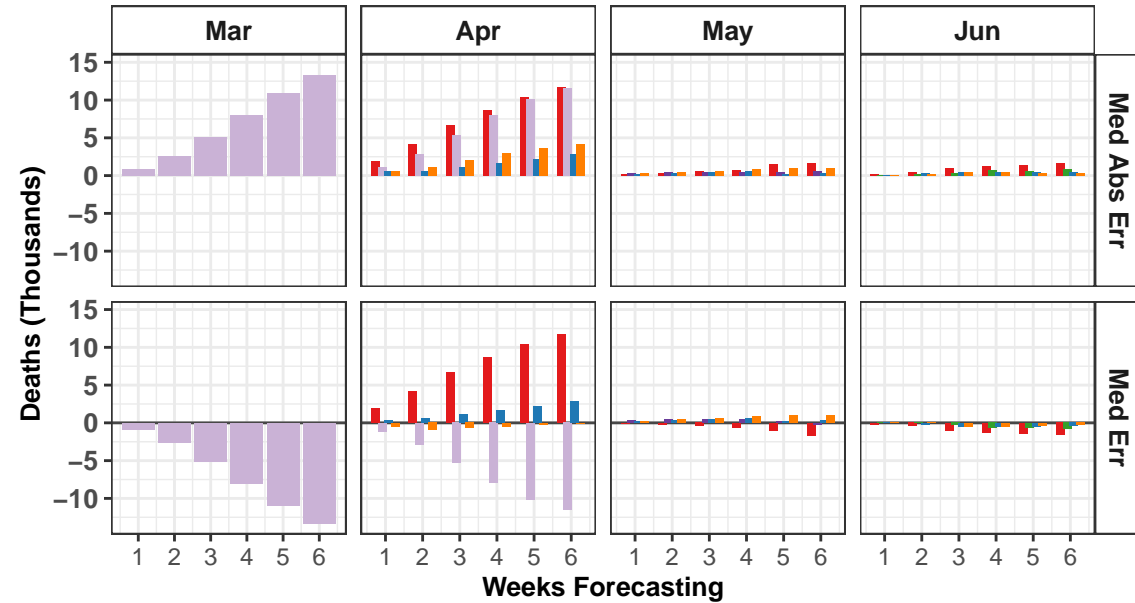

## All Model Versions

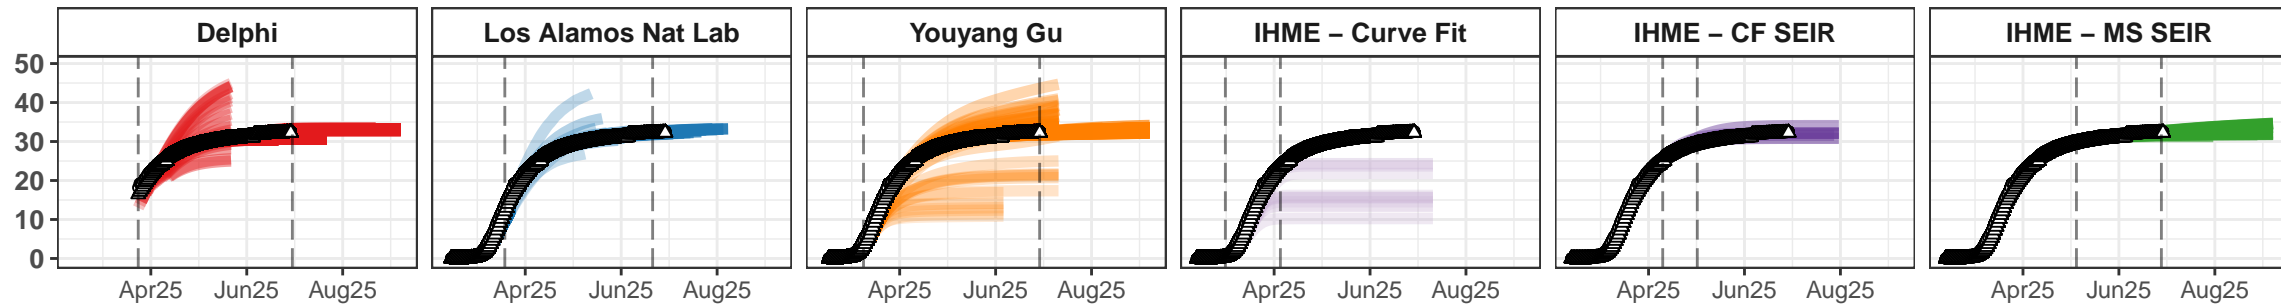

## All Cumulative Errors

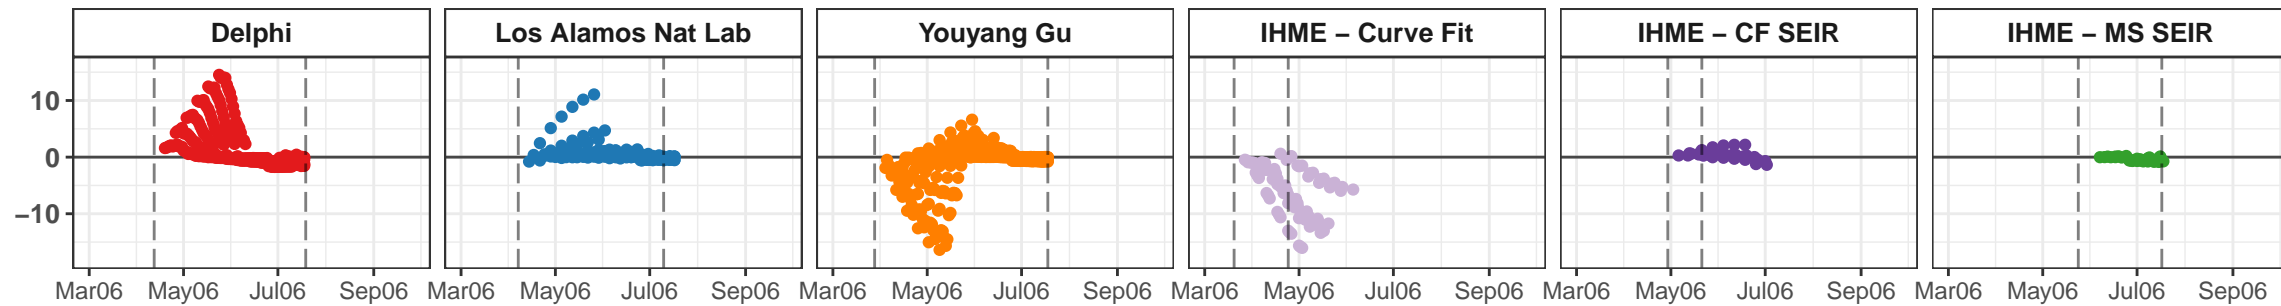

# India

## Current Forecast

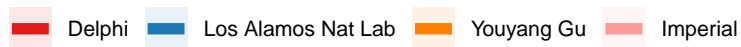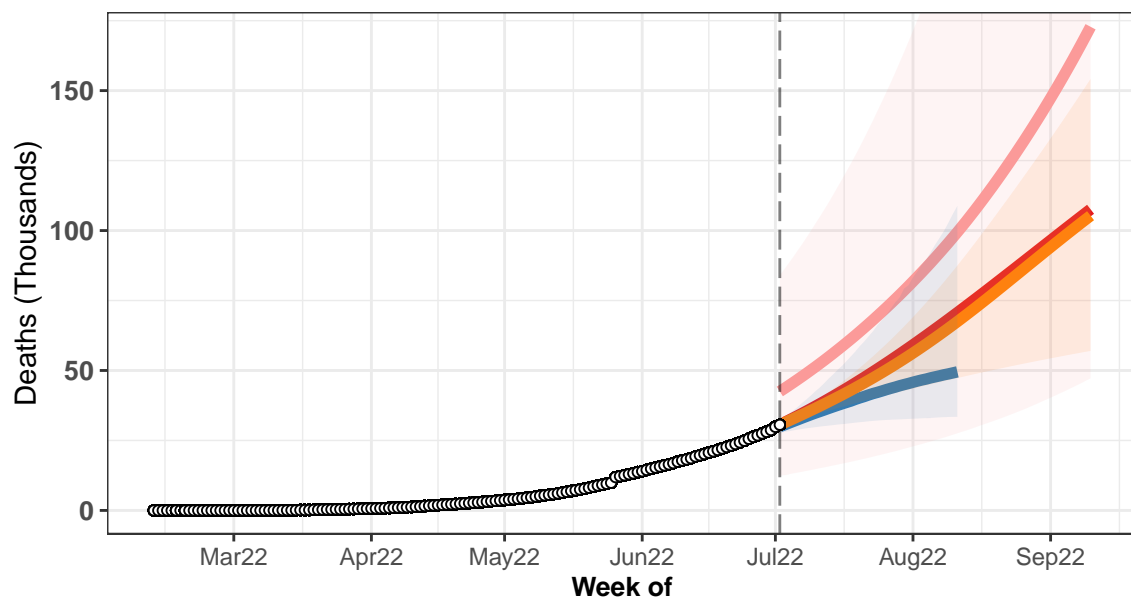

## Cumulative Out-Of-Sample Error (Post Intercept Shift)

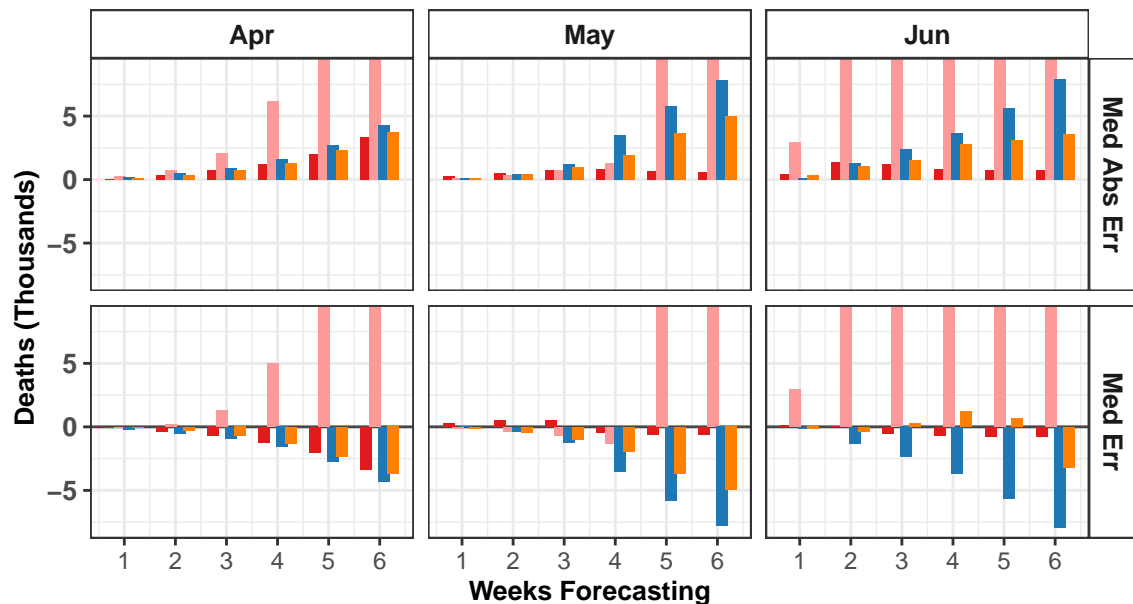

## All Model Versions

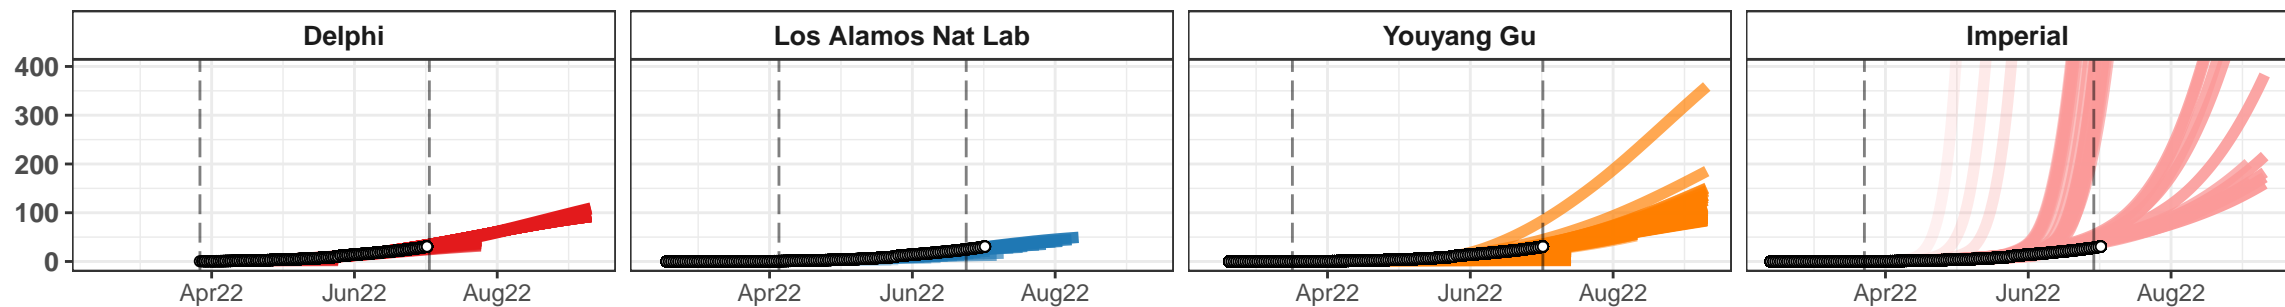

## All Cumulative Errors

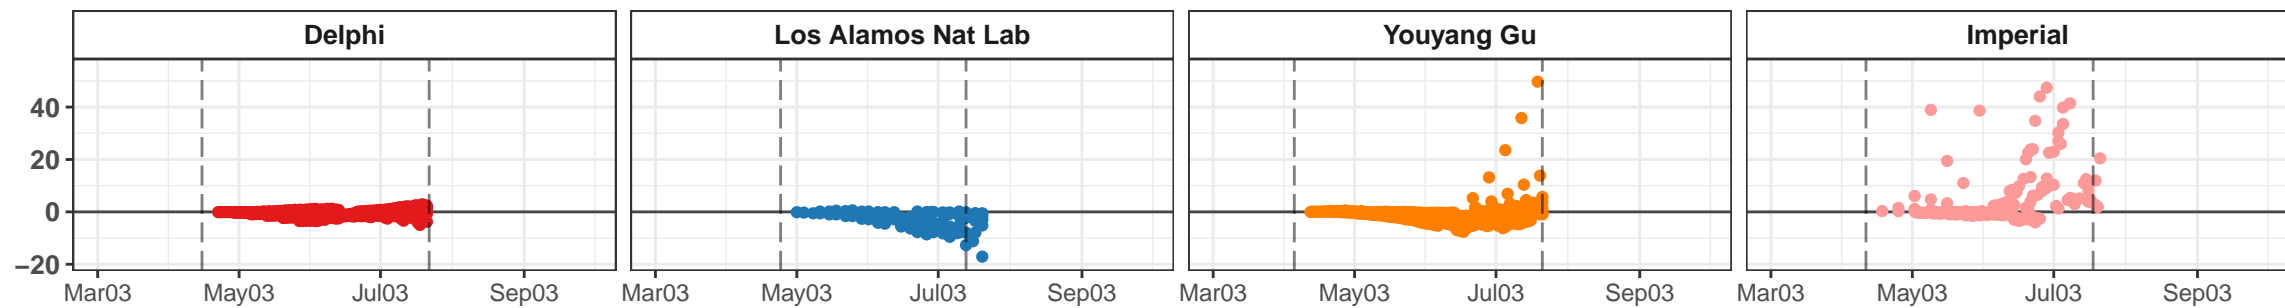

# France

## Current Forecast

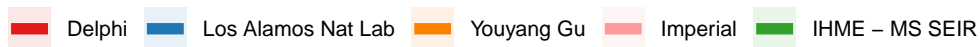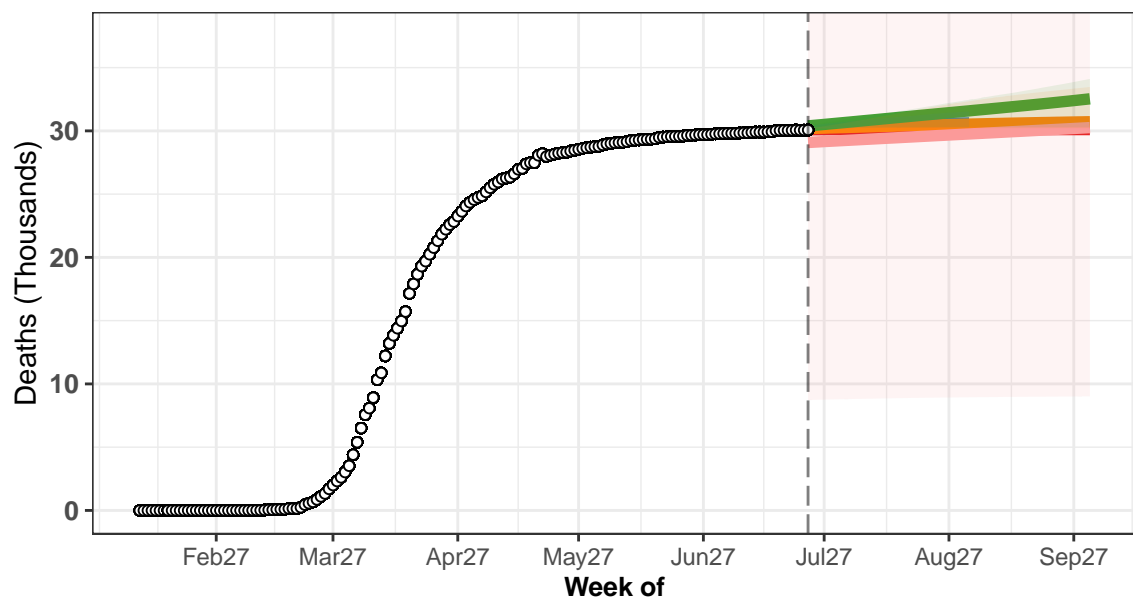

## Cumulative Out-Of-Sample Error (Post Intercept Shift)

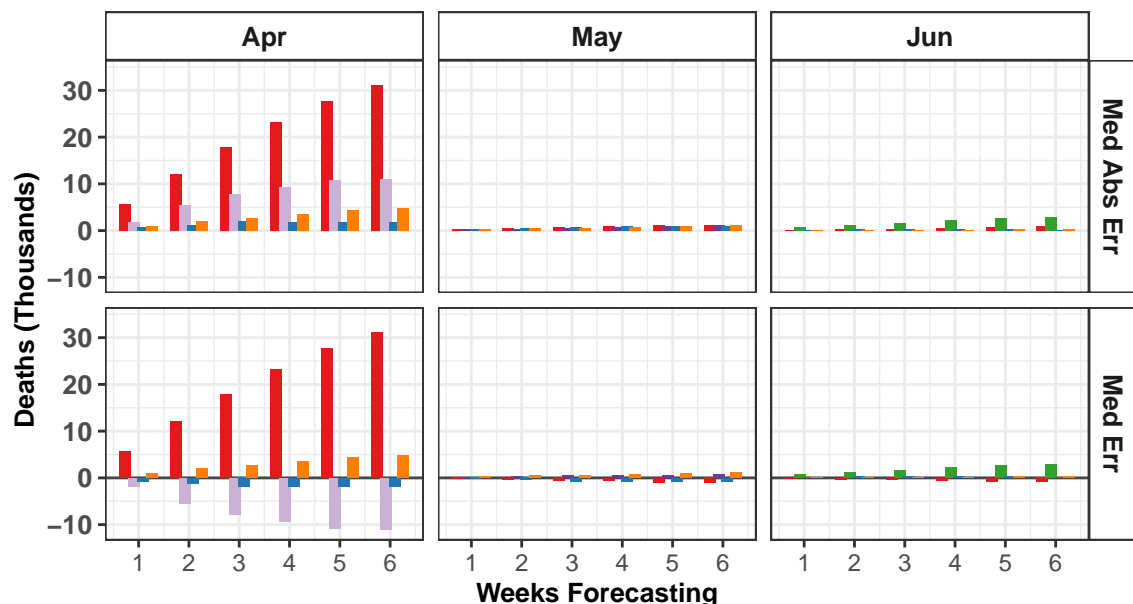

## All Model Versions

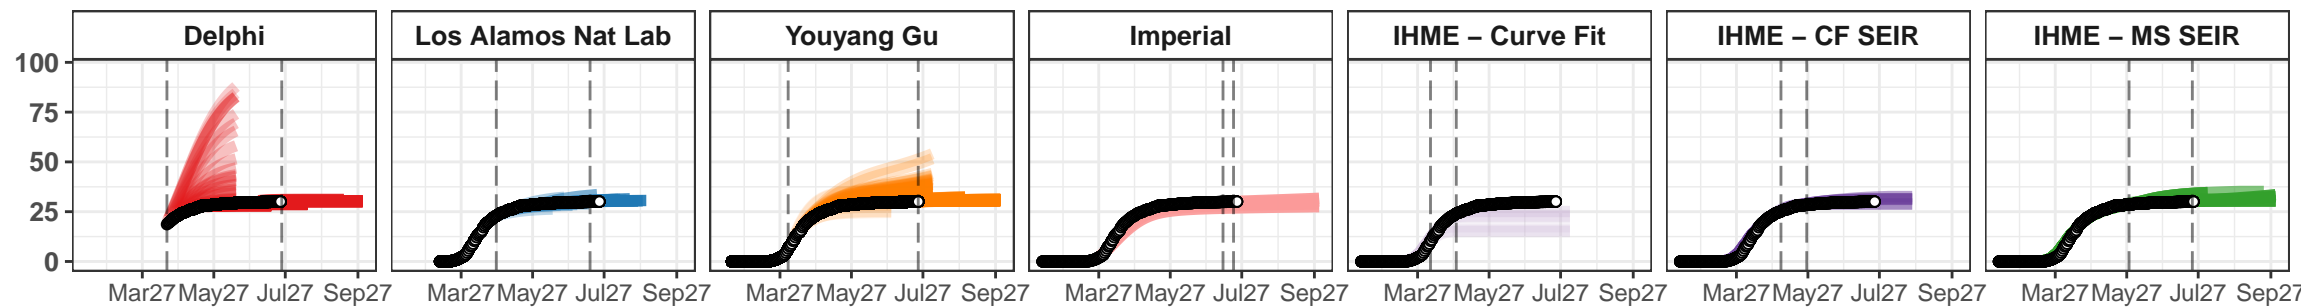

## All Cumulative Errors

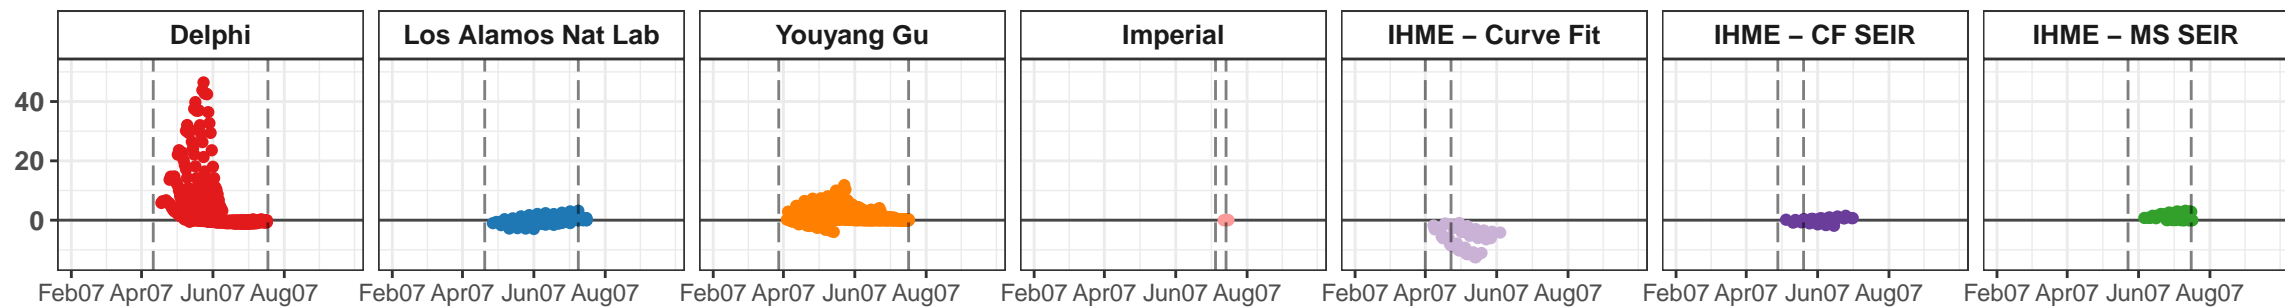

# Spain

## Current Forecast

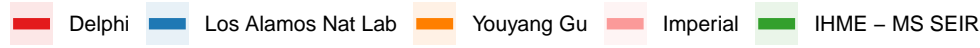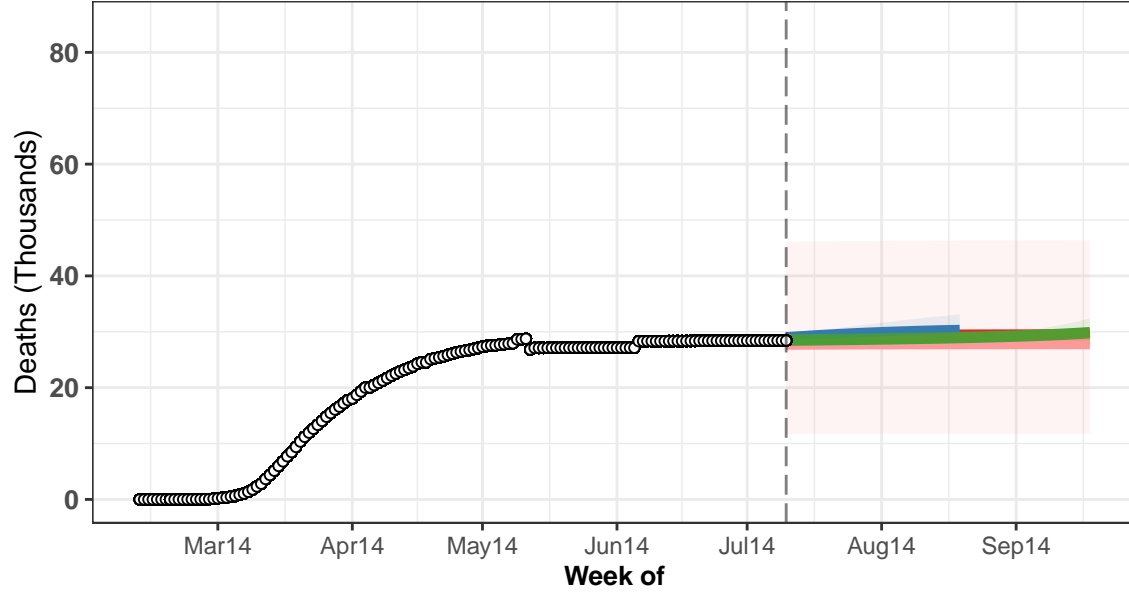

## Cumulative Out-Of-Sample Error (Post Intercept Shift)

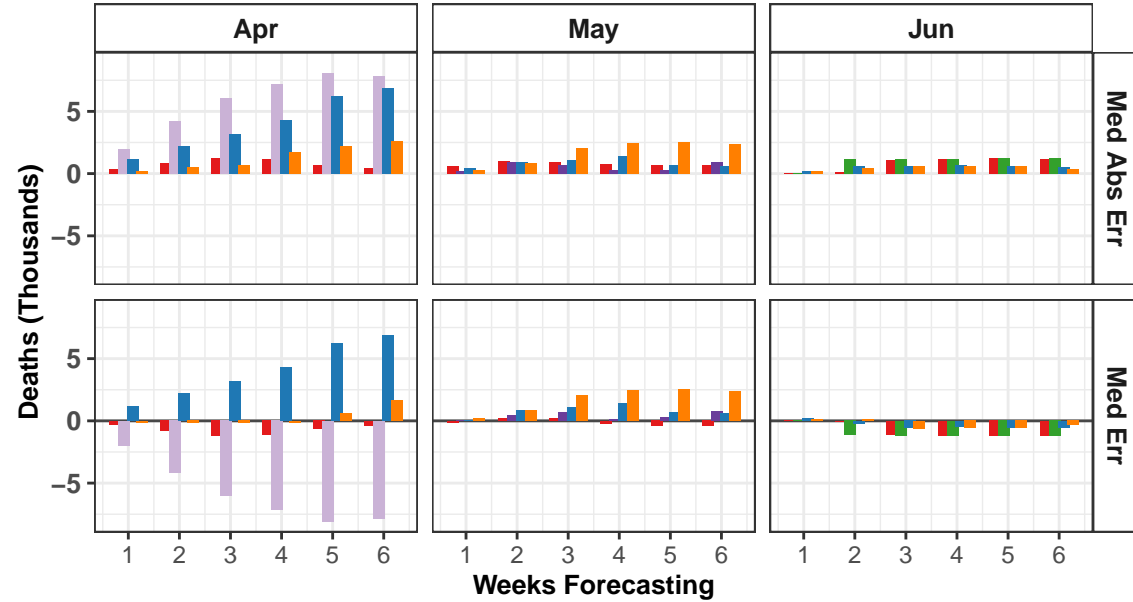

## All Model Versions

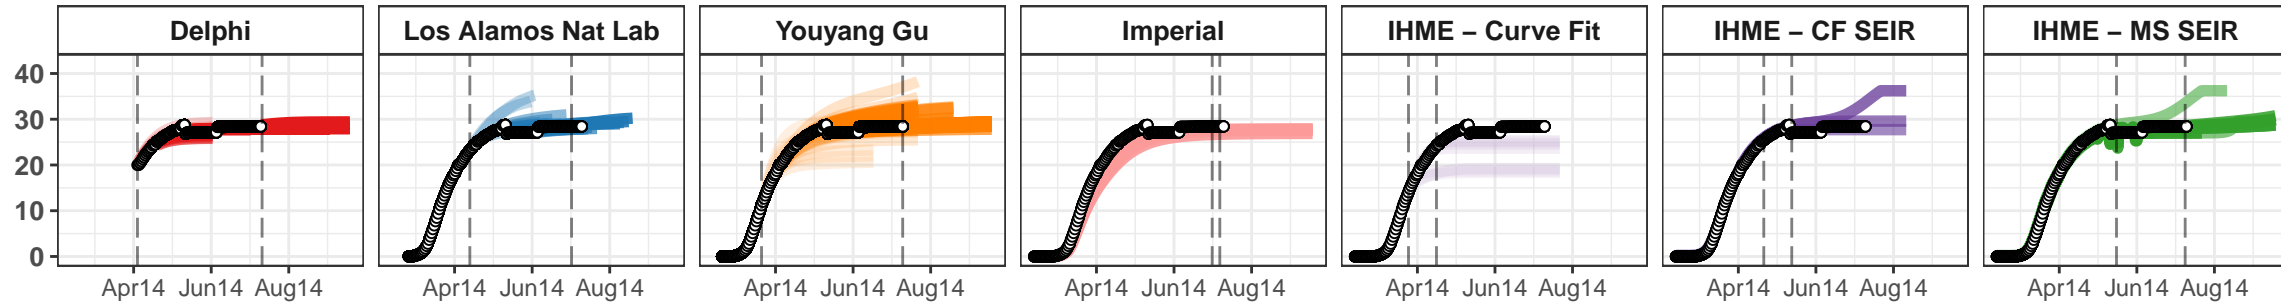

## All Cumulative Errors

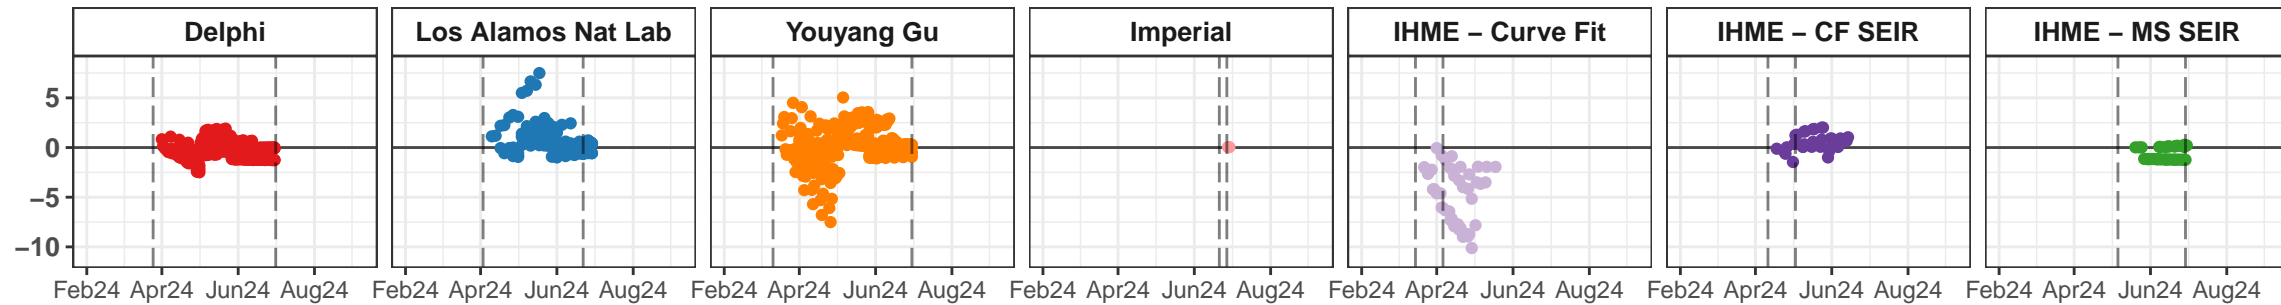

# New Jersey

## Current Forecast

Delphi Los Alamos Nat Lab Youyang Gu IHME - MS SEIR ○ JHU △ NYT

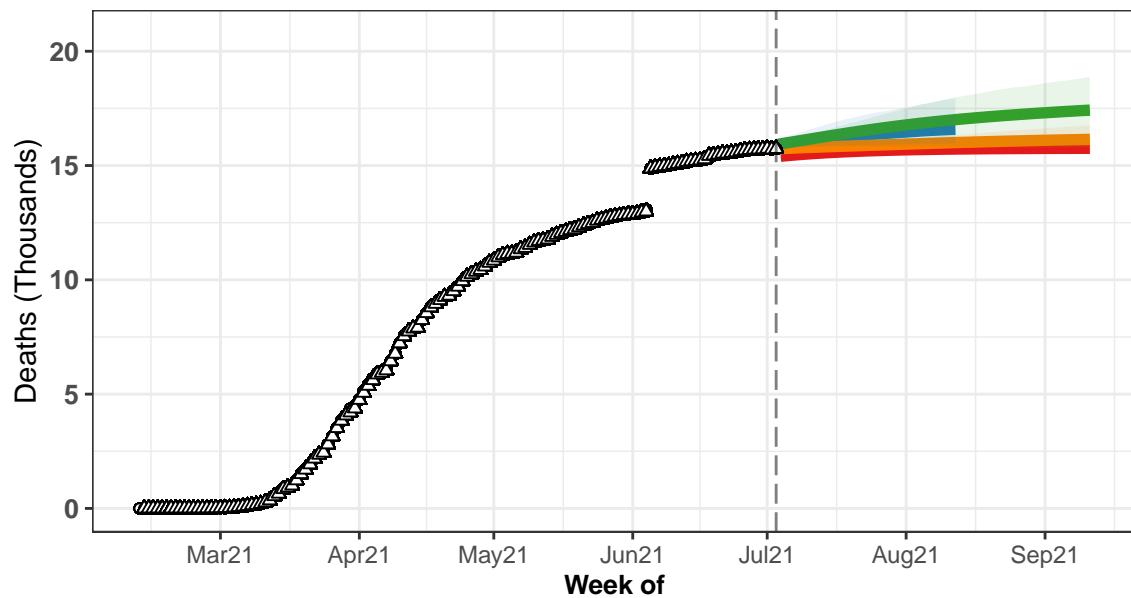

## Cumulative Out-Of-Sample Error (Post Intercept Shift)

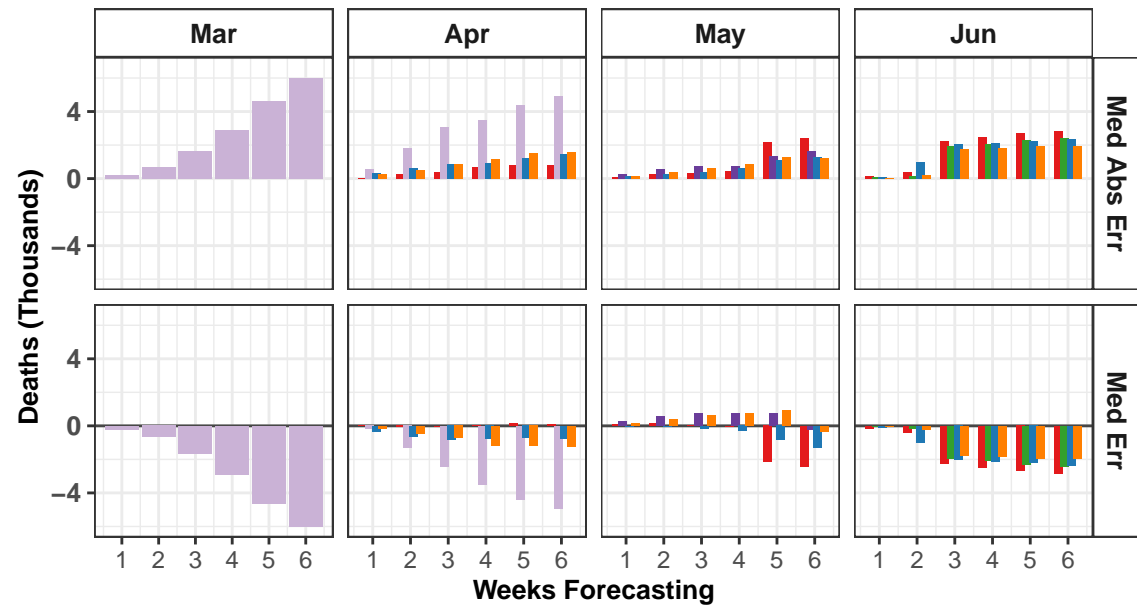

## All Model Versions

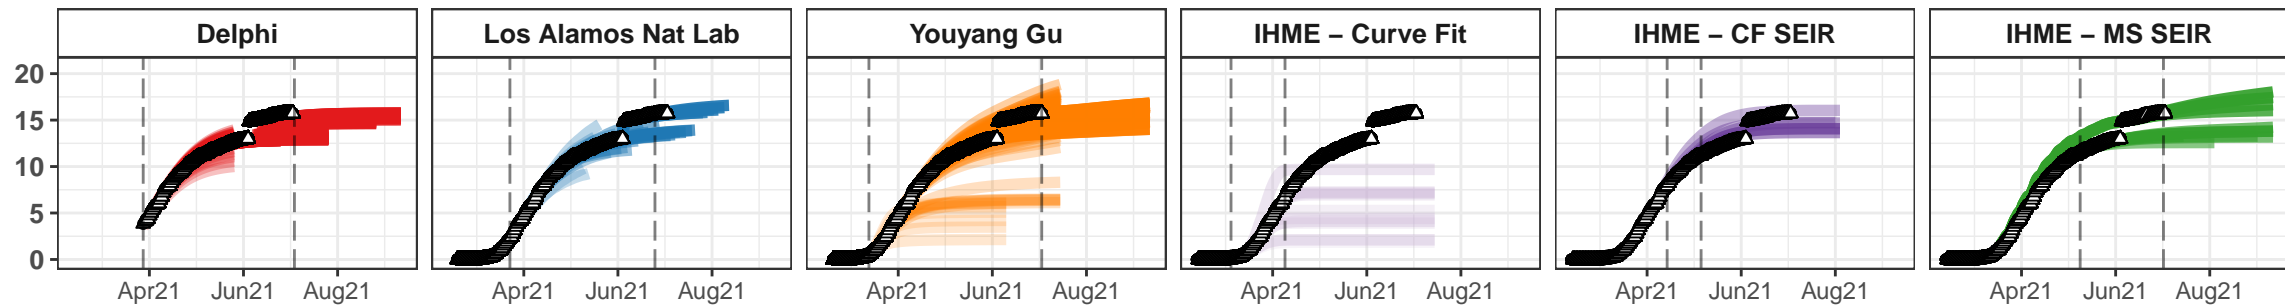

## All Cumulative Errors

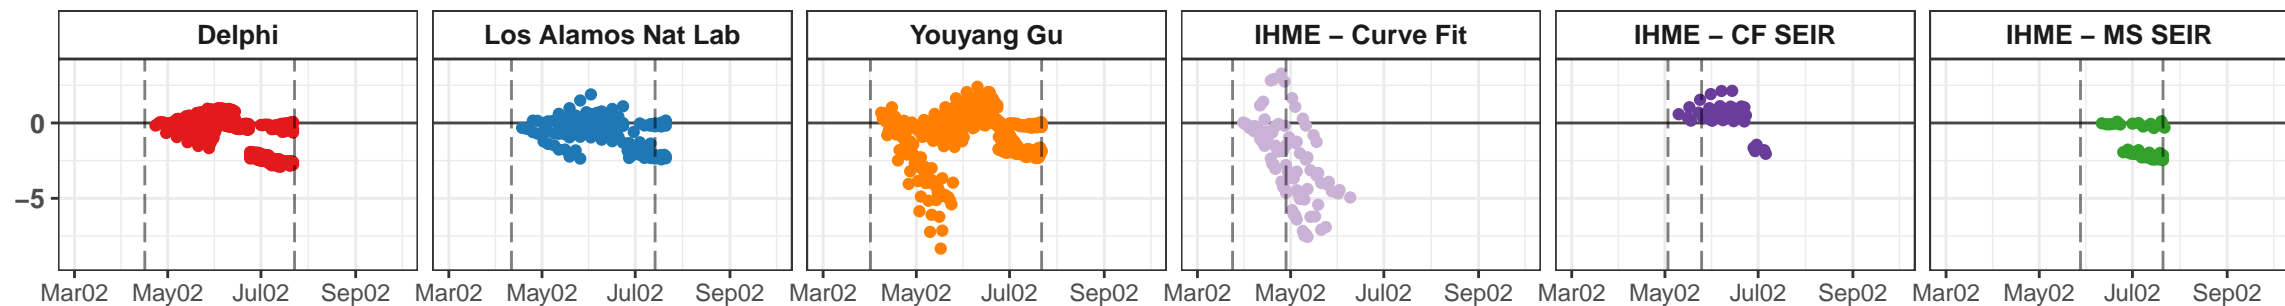

# Iran

## Current Forecast

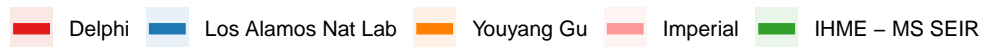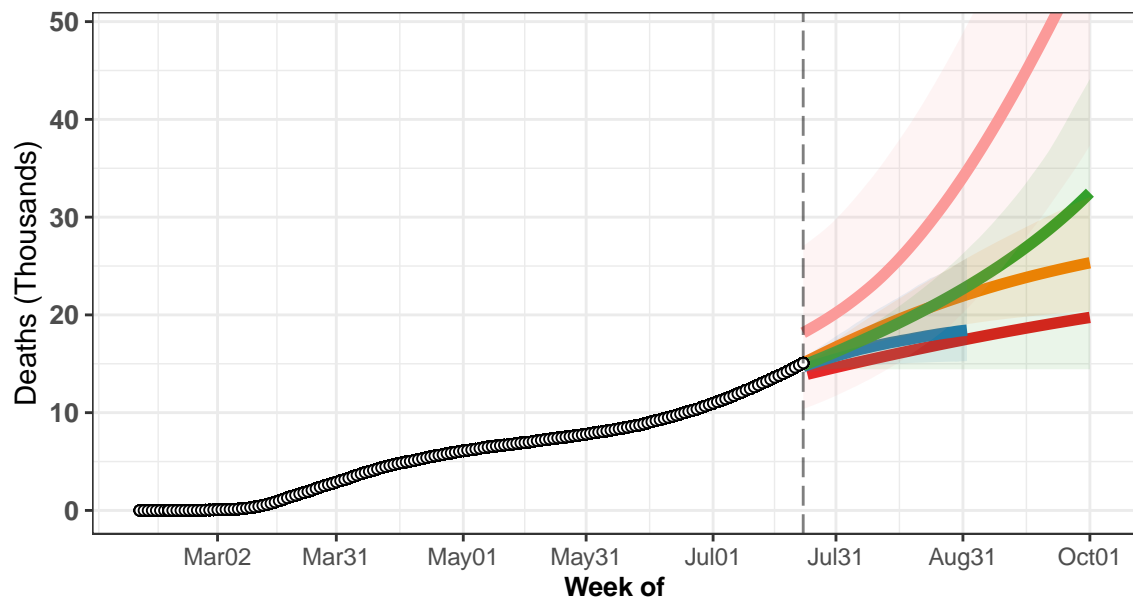

## Cumulative Out-Of-Sample Error (Post Intercept Shift)

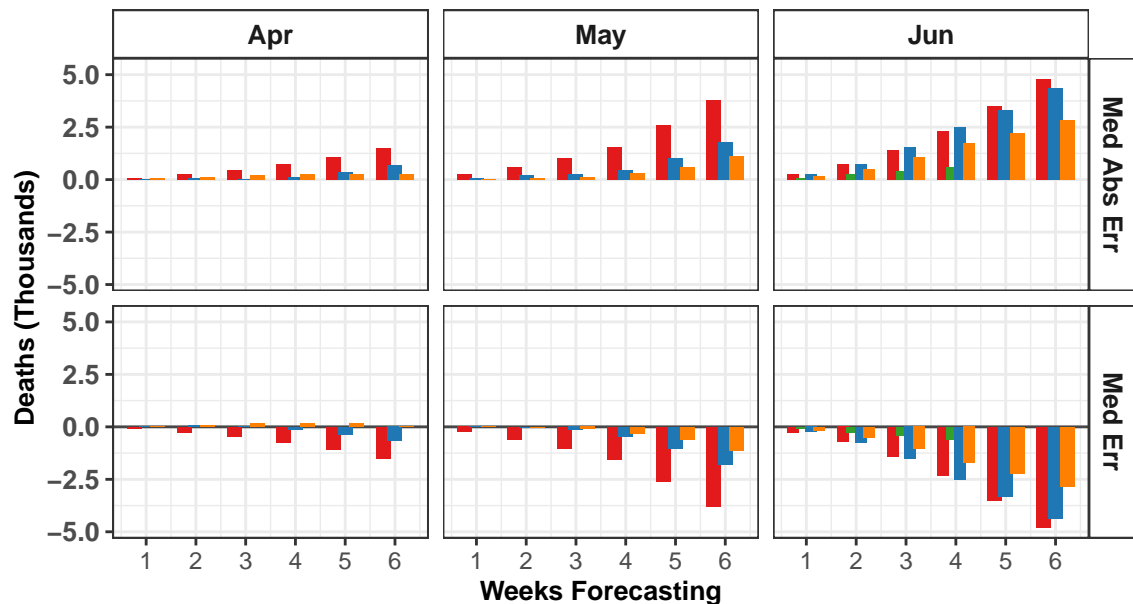

## All Model Versions

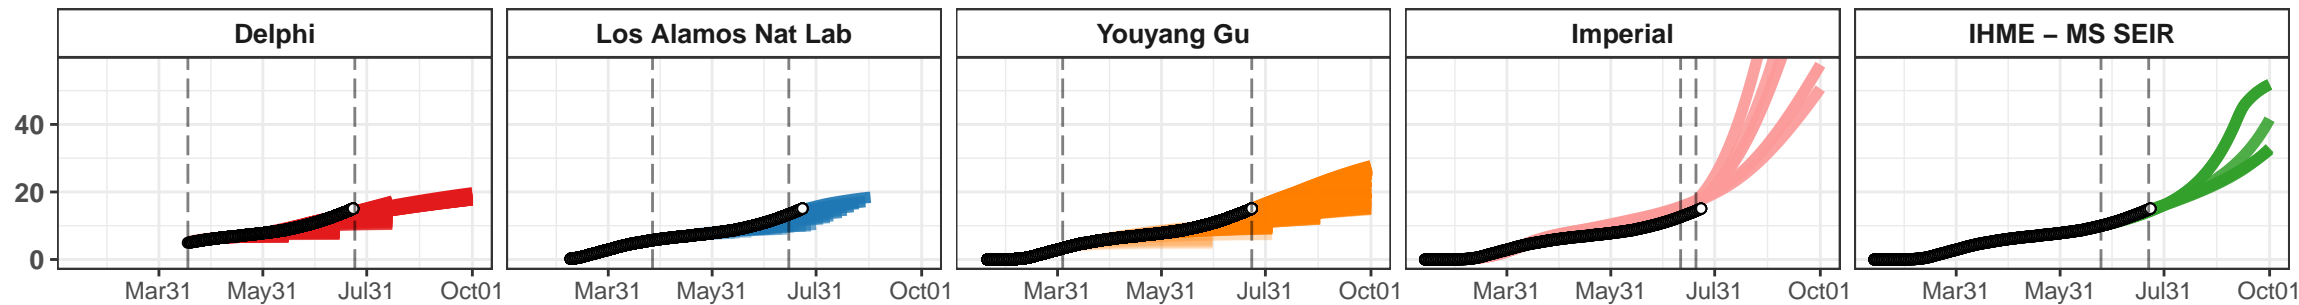

## All Cumulative Errors

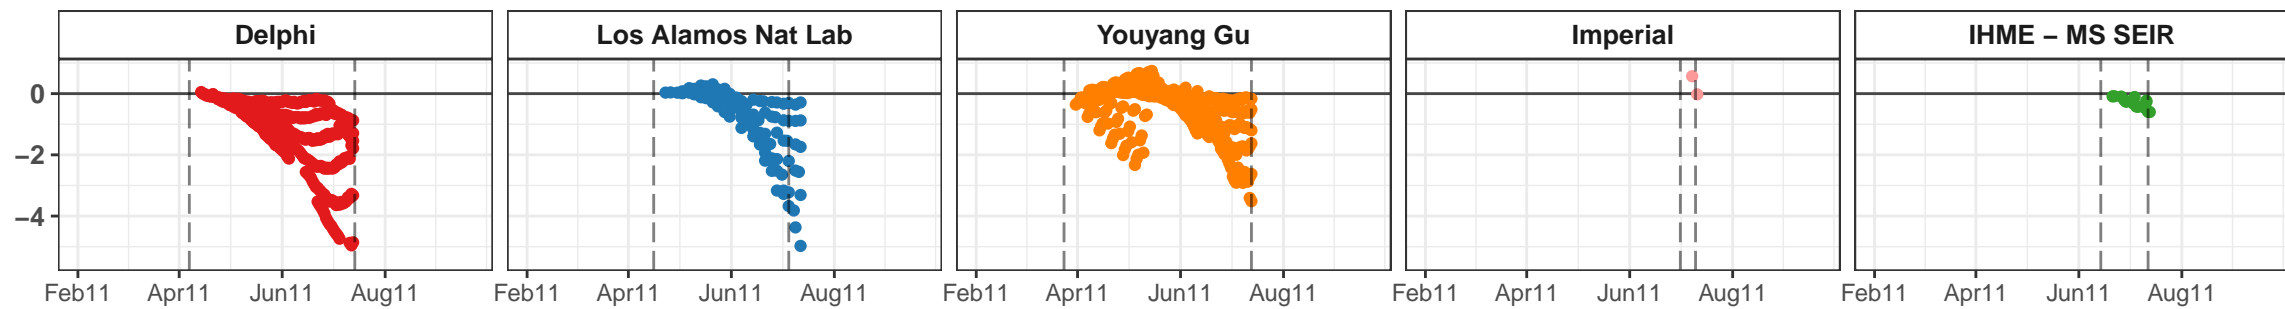

# Russian Federation

## Current Forecast

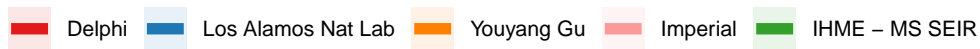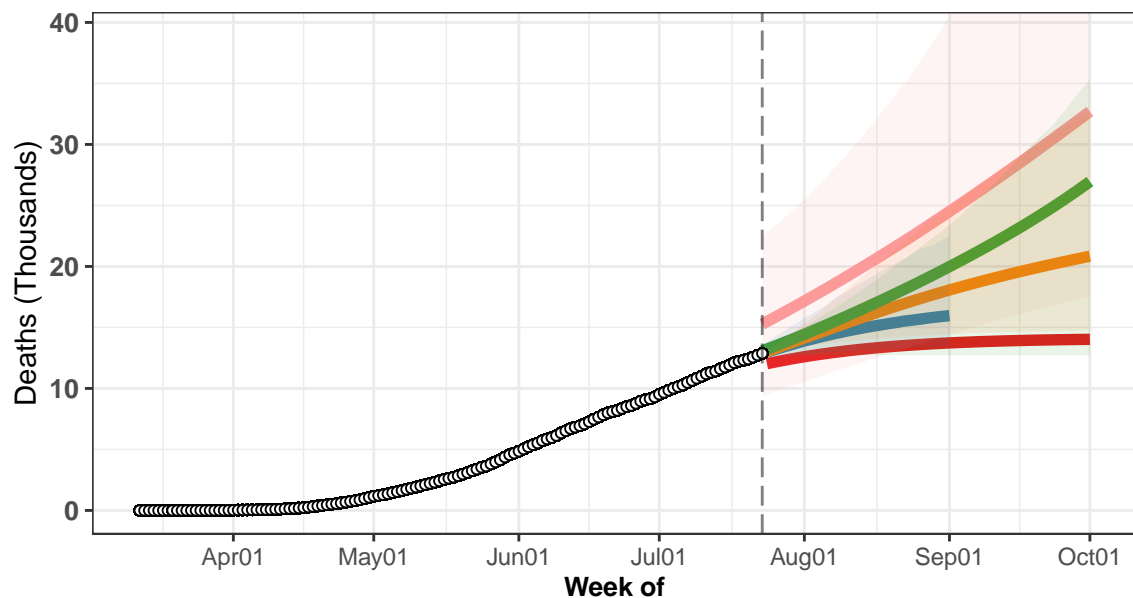

## Cumulative Out-Of-Sample Error (Post Intercept Shift)

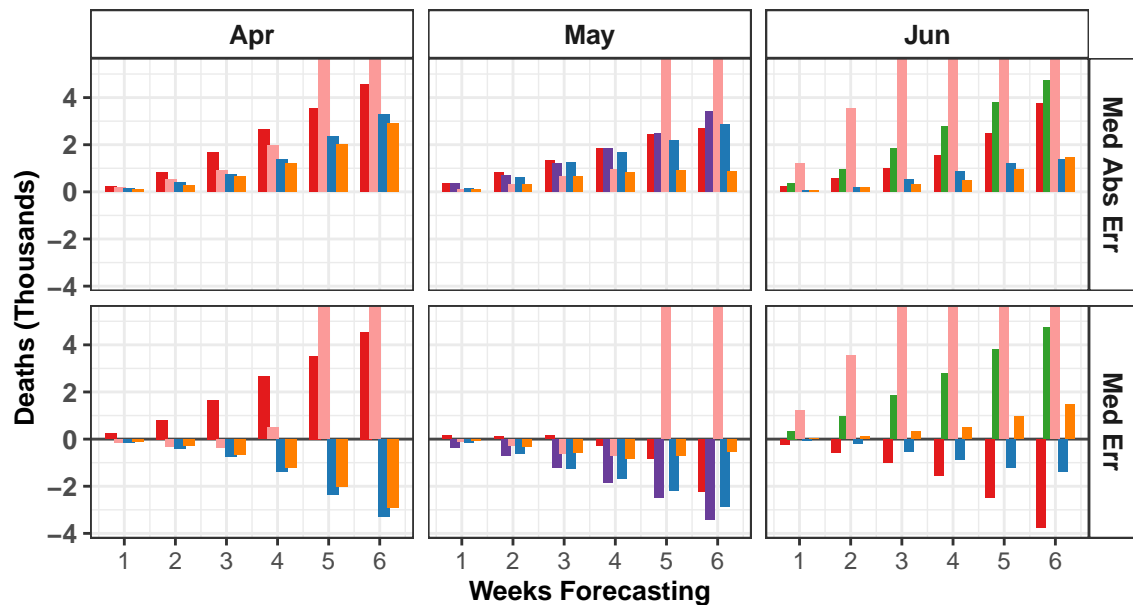

## All Model Versions

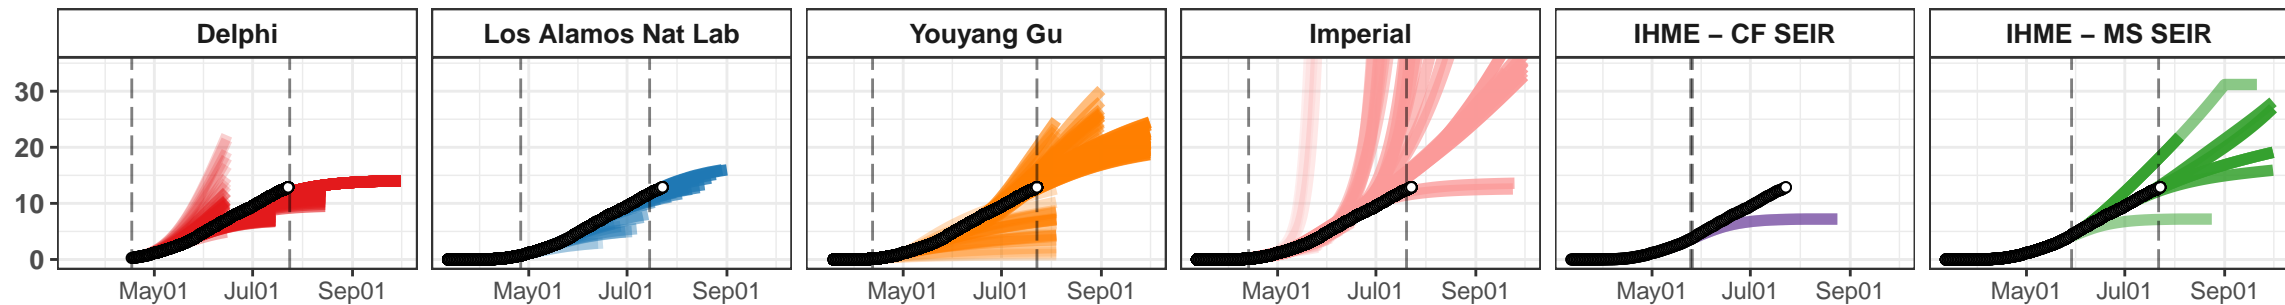

## All Cumulative Errors

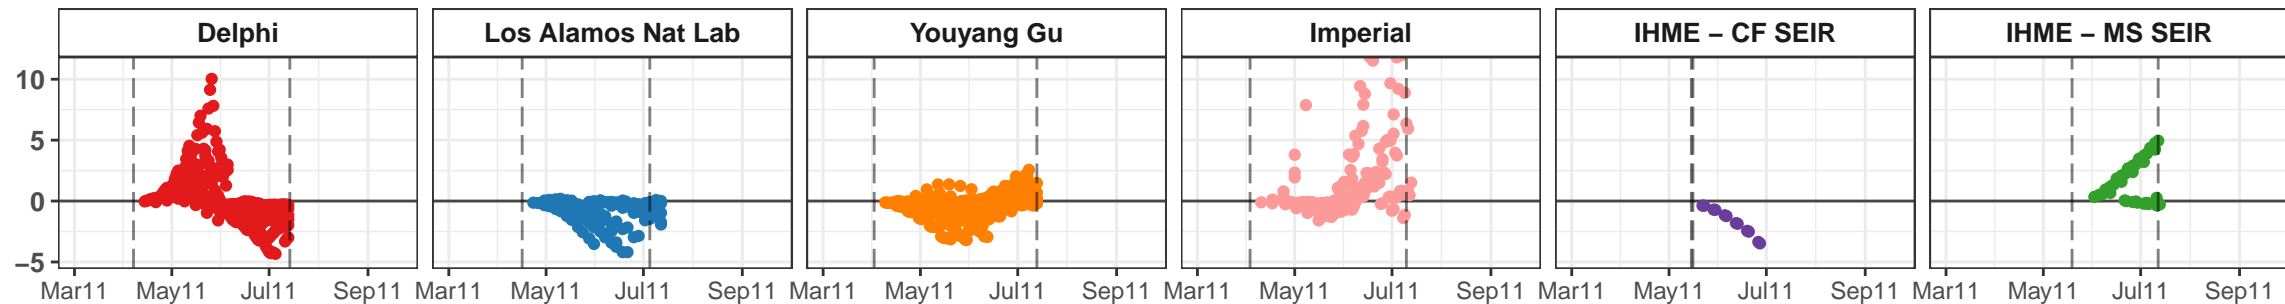



# Belgium

## Current Forecast

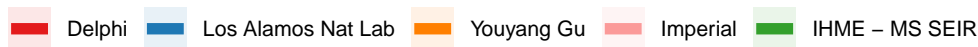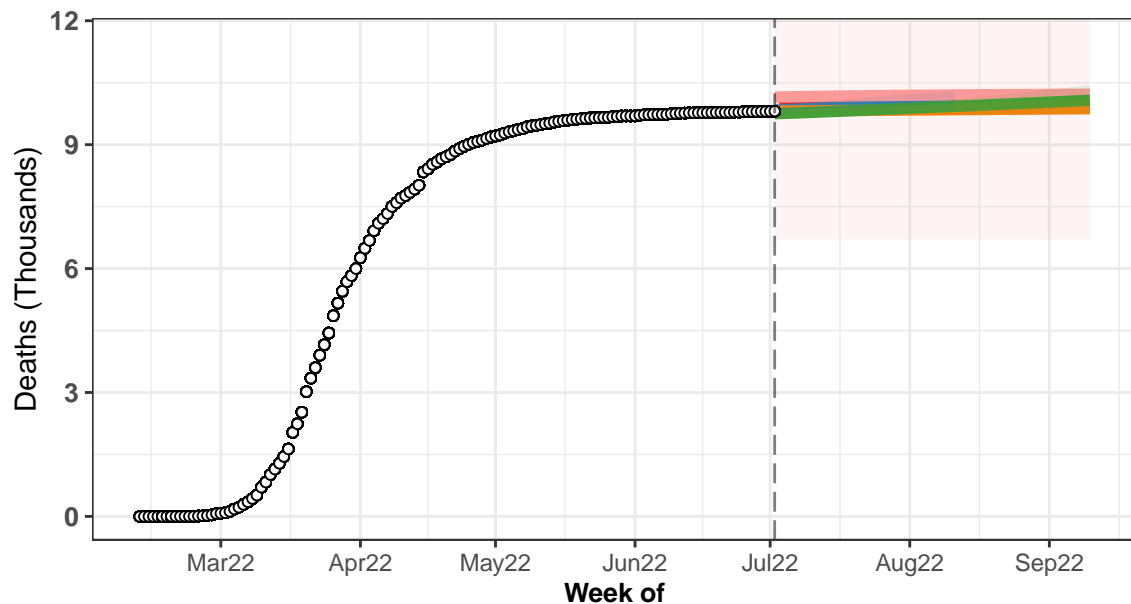

## Cumulative Out-Of-Sample Error (Post Intercept Shift)

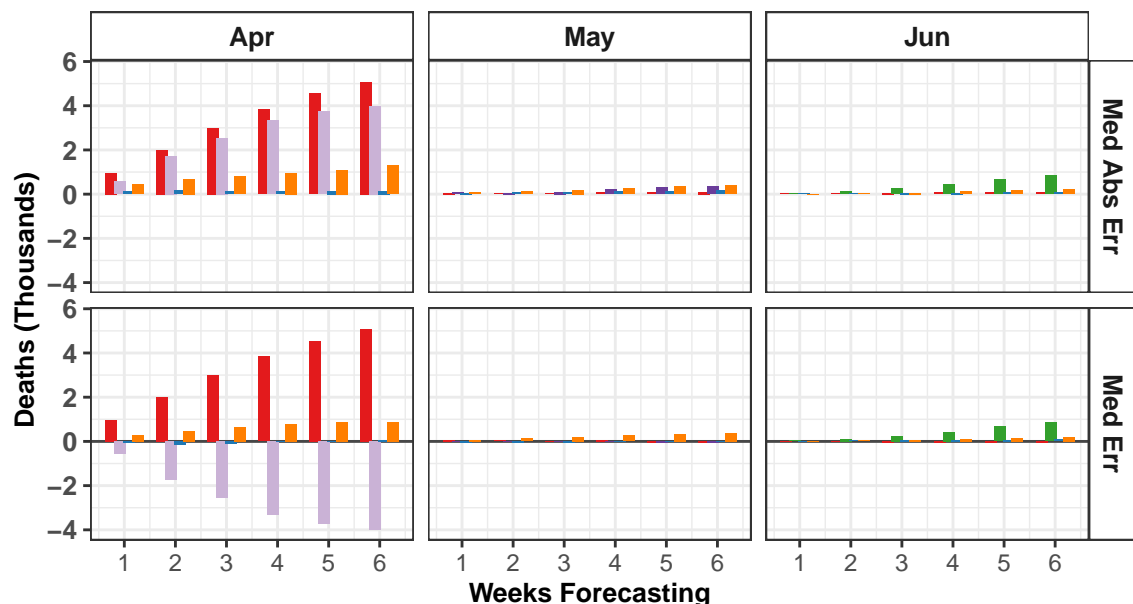

## All Model Versions

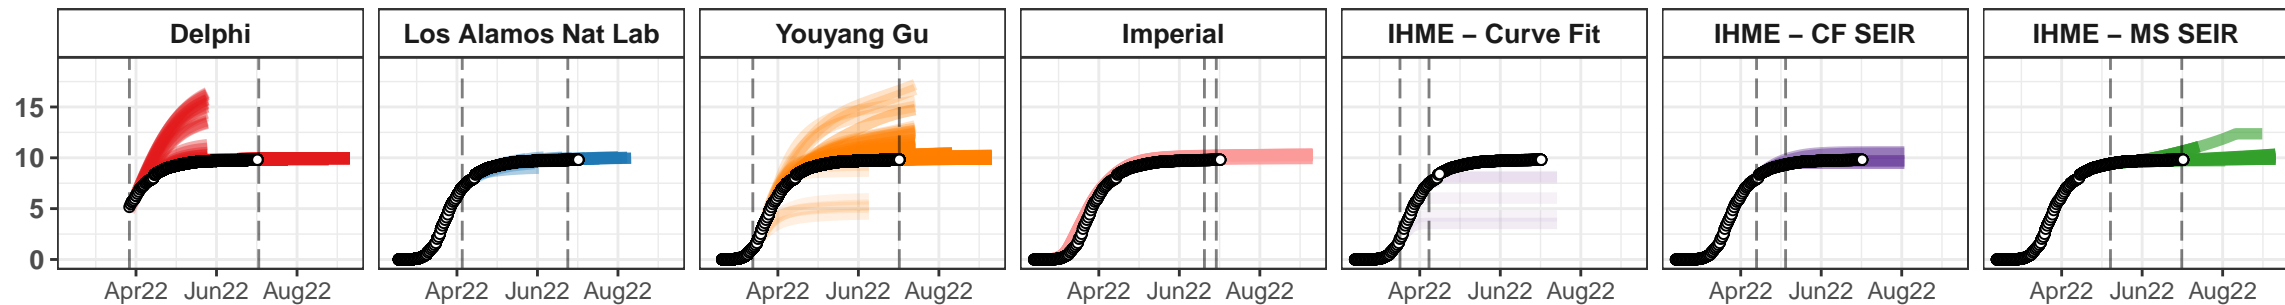

## All Cumulative Errors

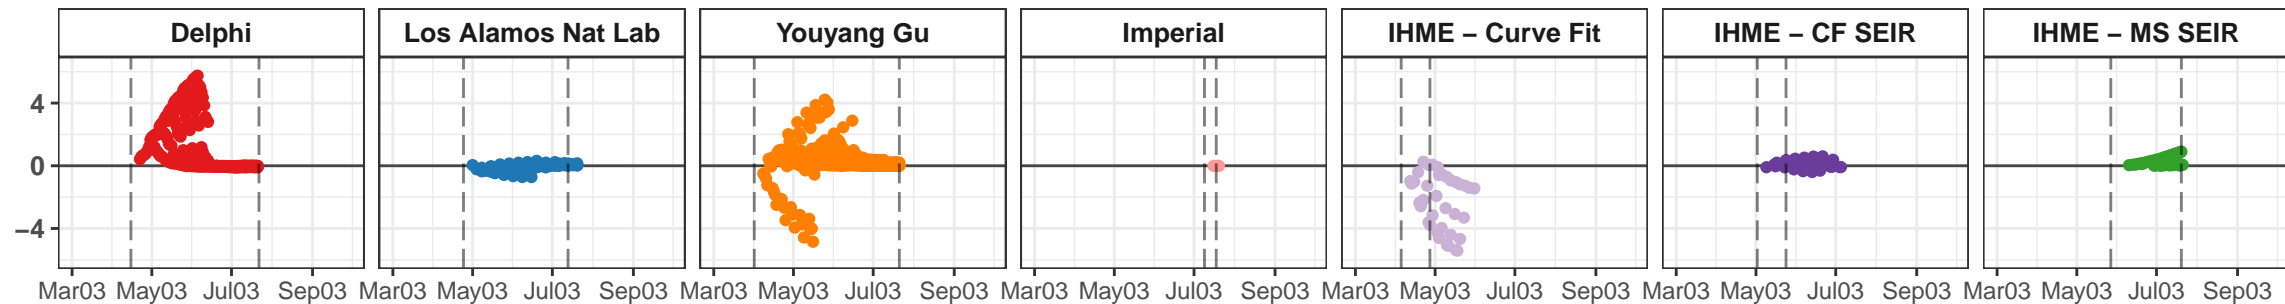

# Germany

## Current Forecast

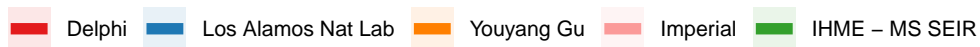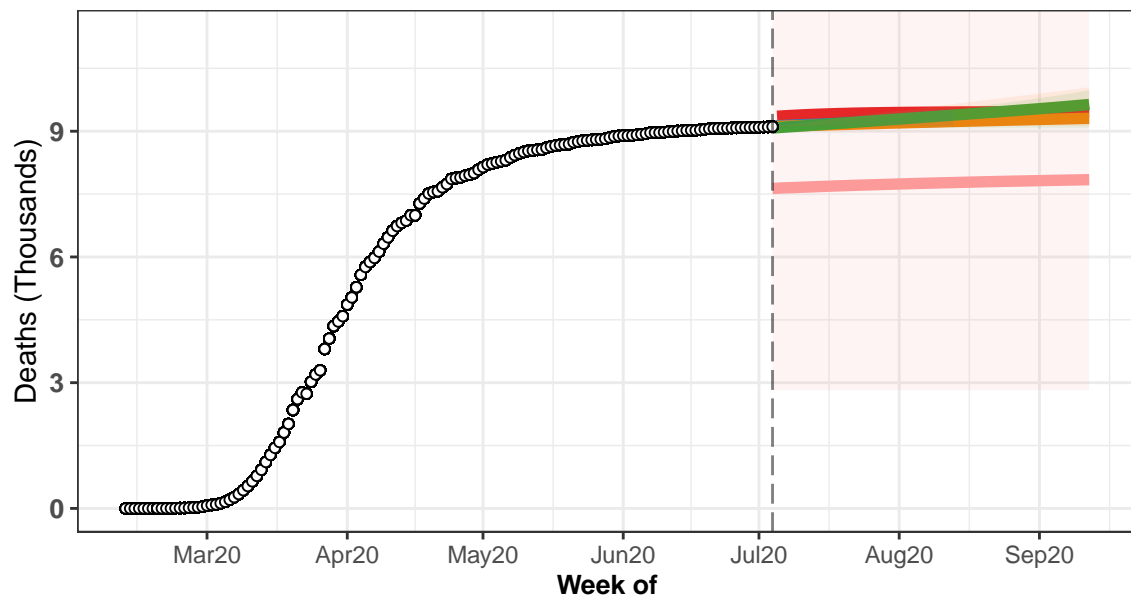

## Cumulative Out-Of-Sample Error (Post Intercept Shift)

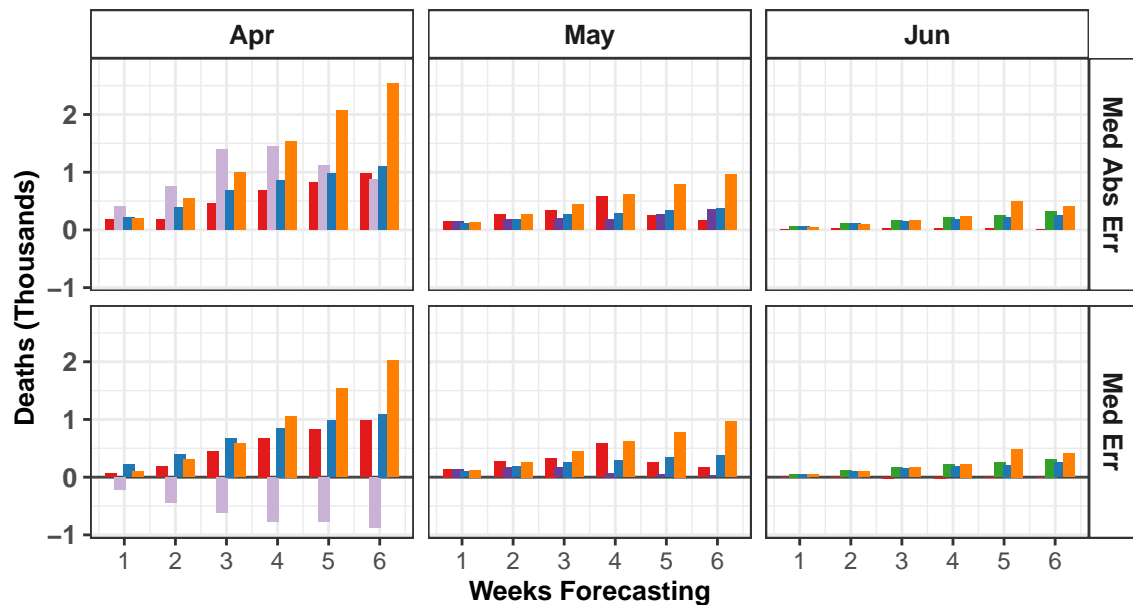

## All Model Versions

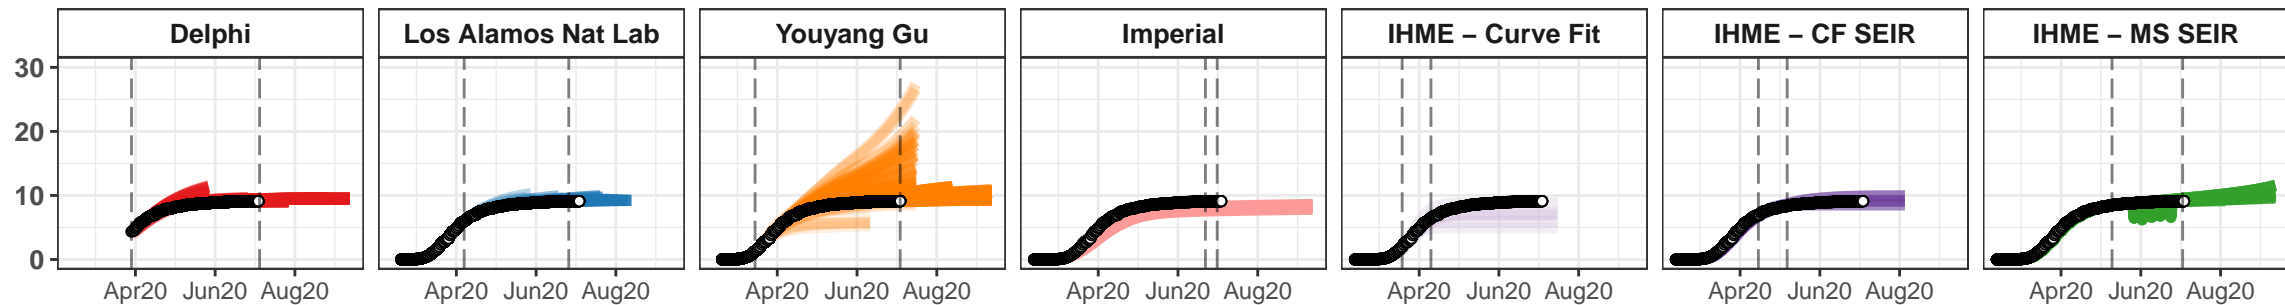

## All Cumulative Errors

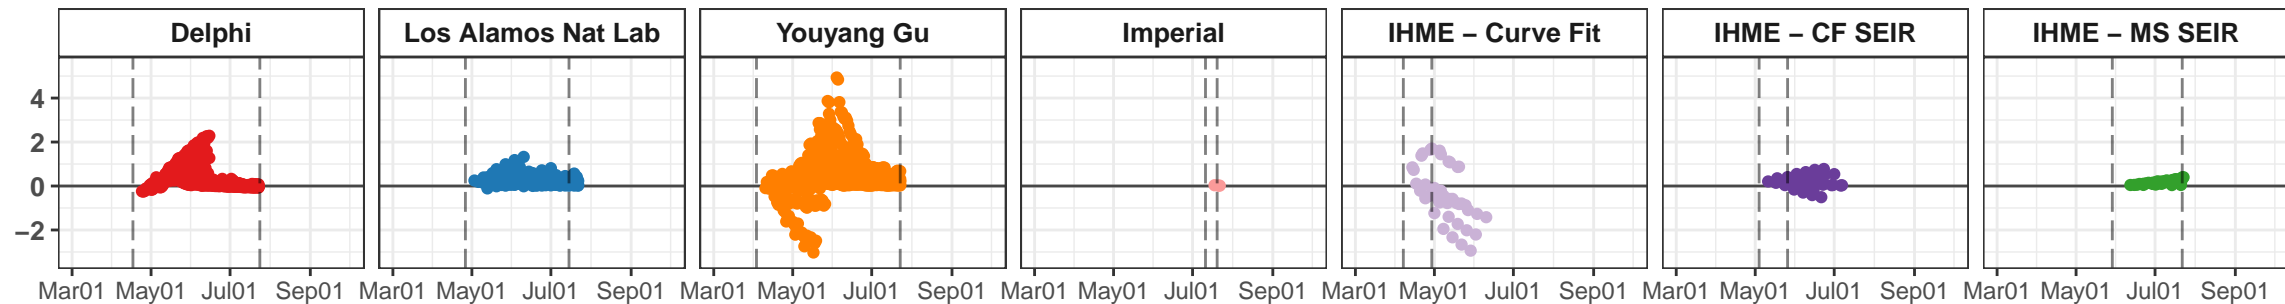

# Canada

## Current Forecast

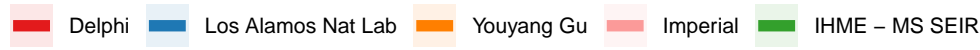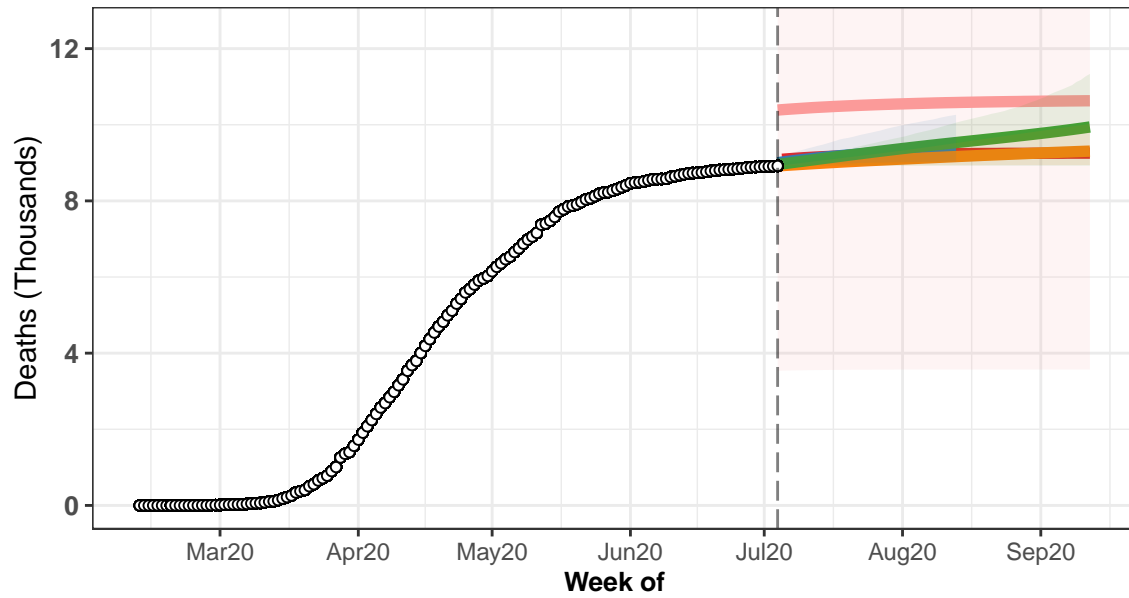

## Cumulative Out-Of-Sample Error (Post Intercept Shift)

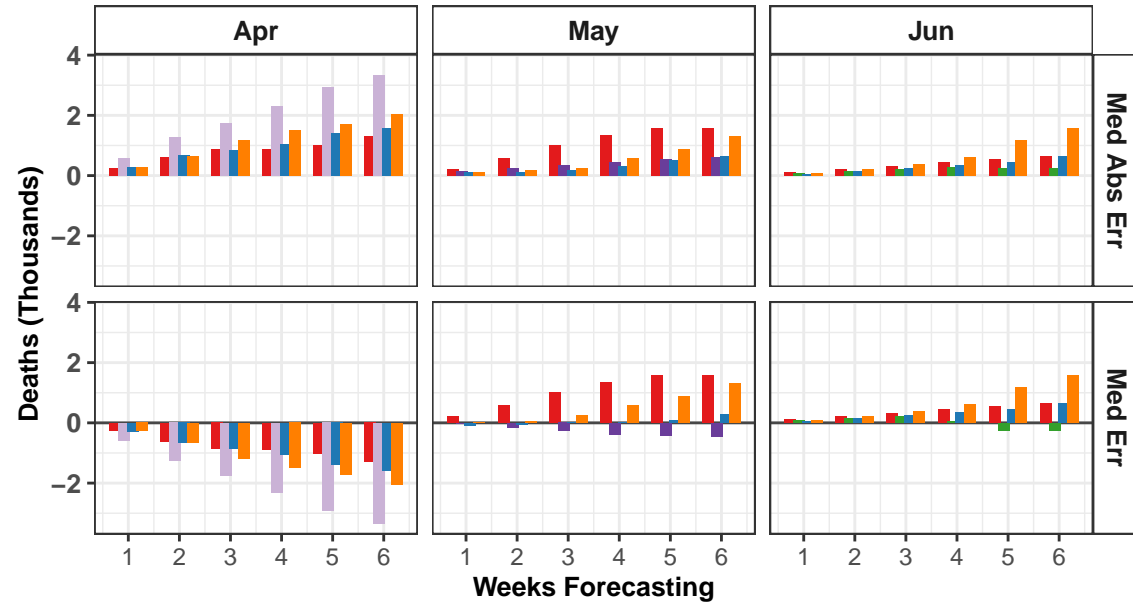

## All Model Versions

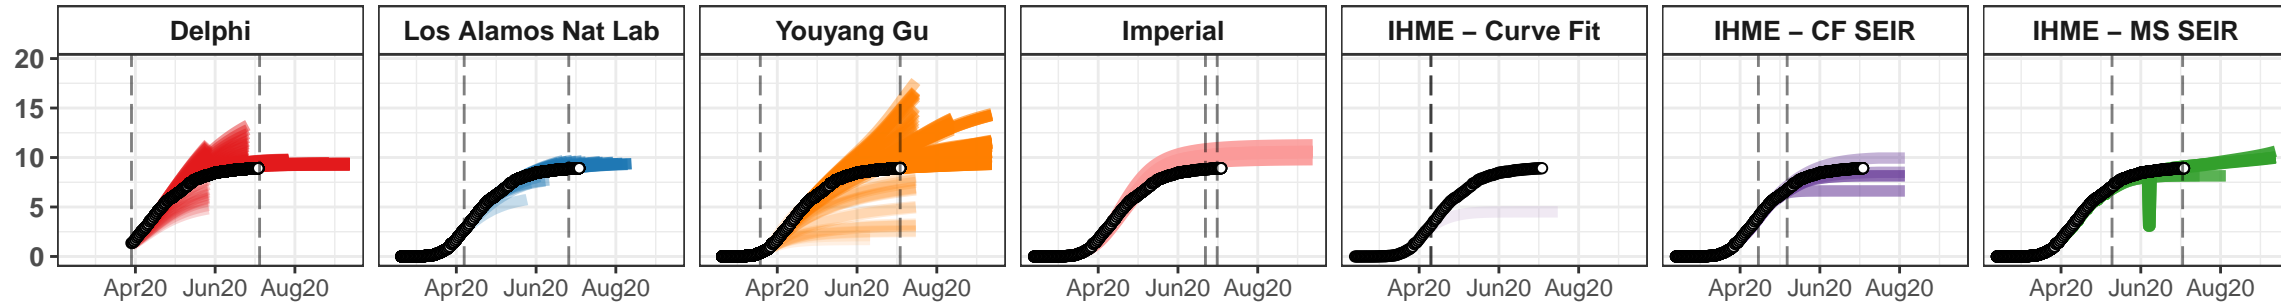

## All Cumulative Errors

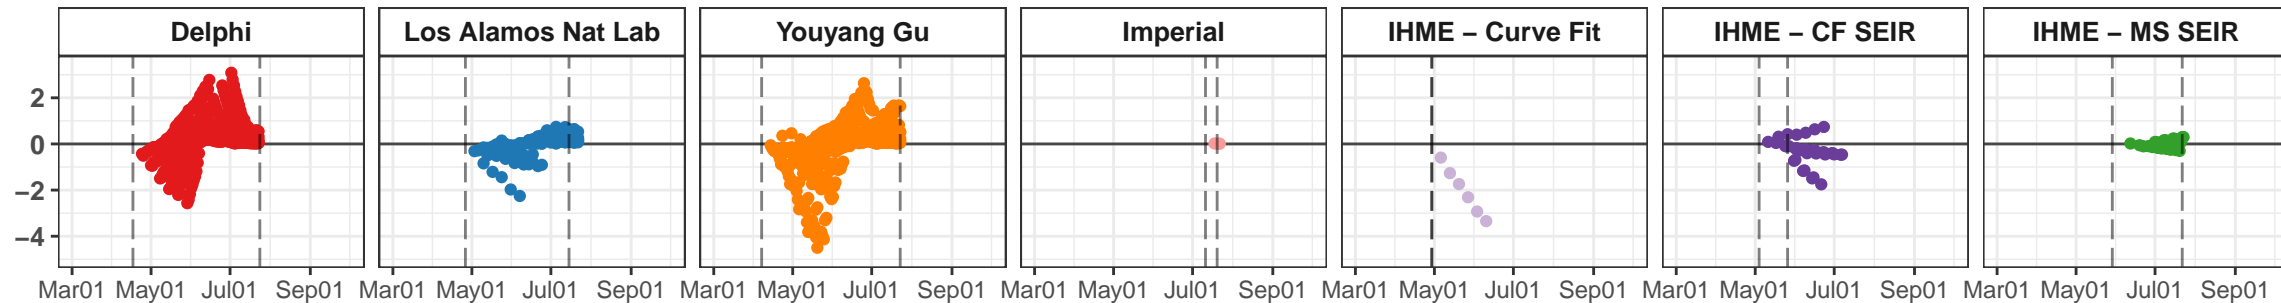

# Chile

## Current Forecast

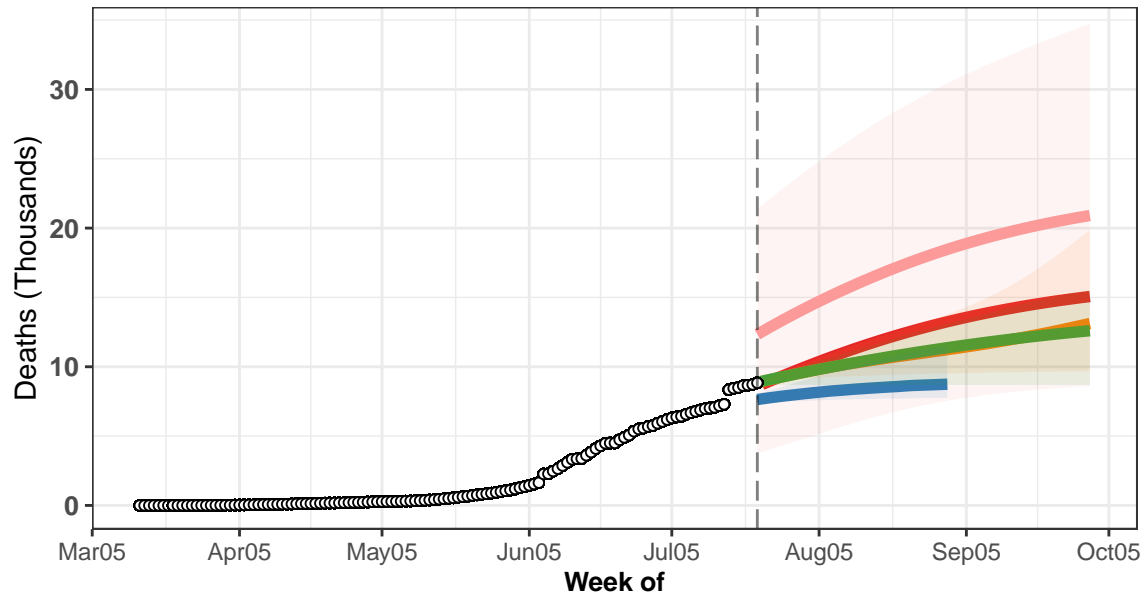

## Cumulative Out-Of-Sample Error (Post Intercept Shift)

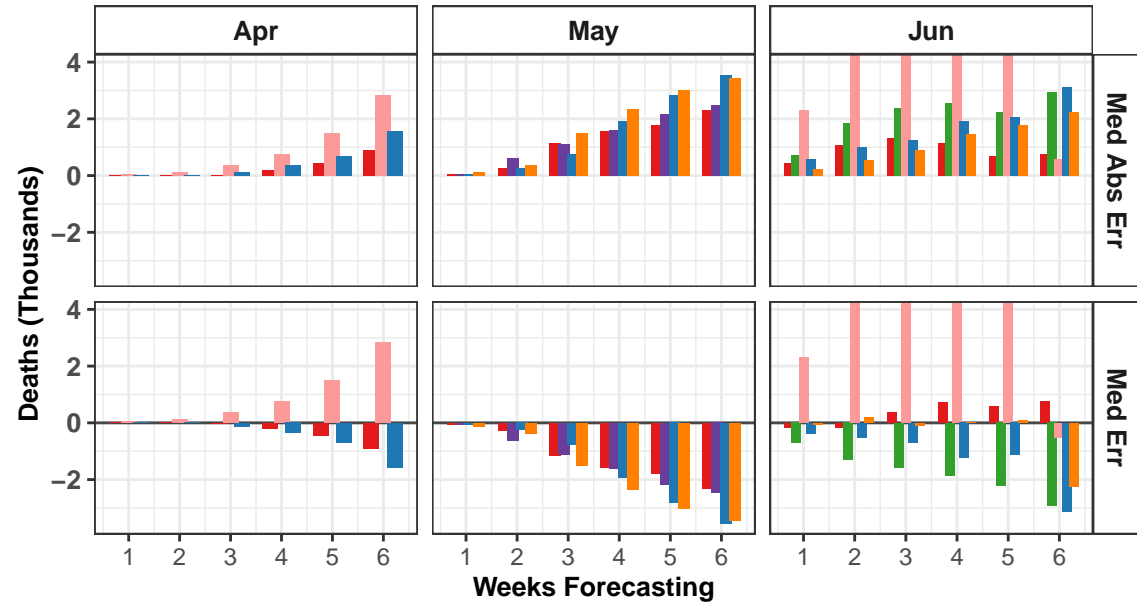

## All Model Versions

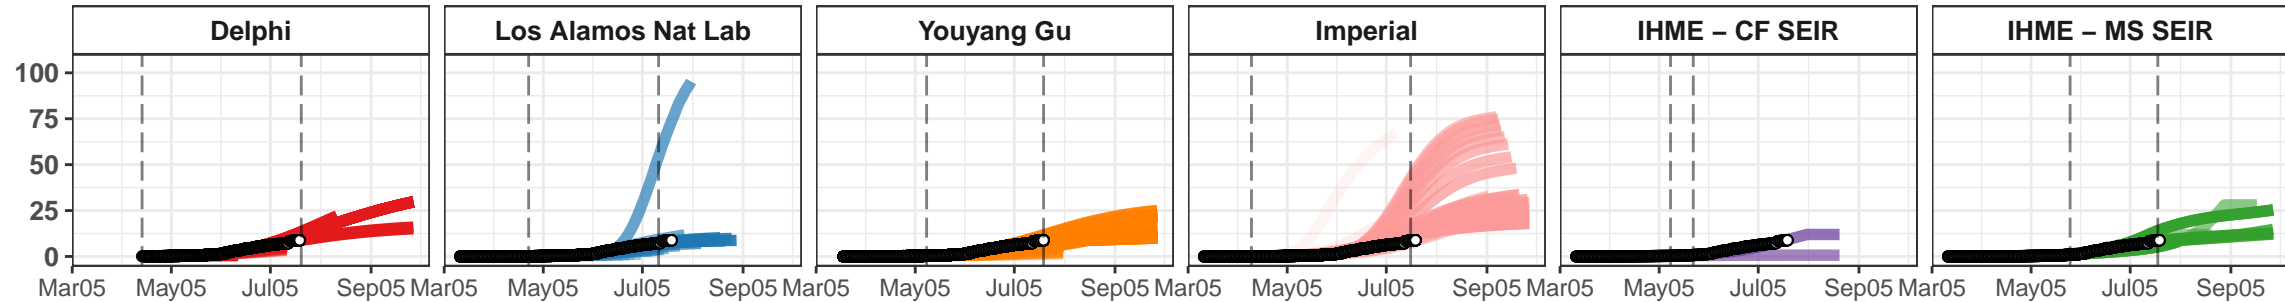

## All Cumulative Errors

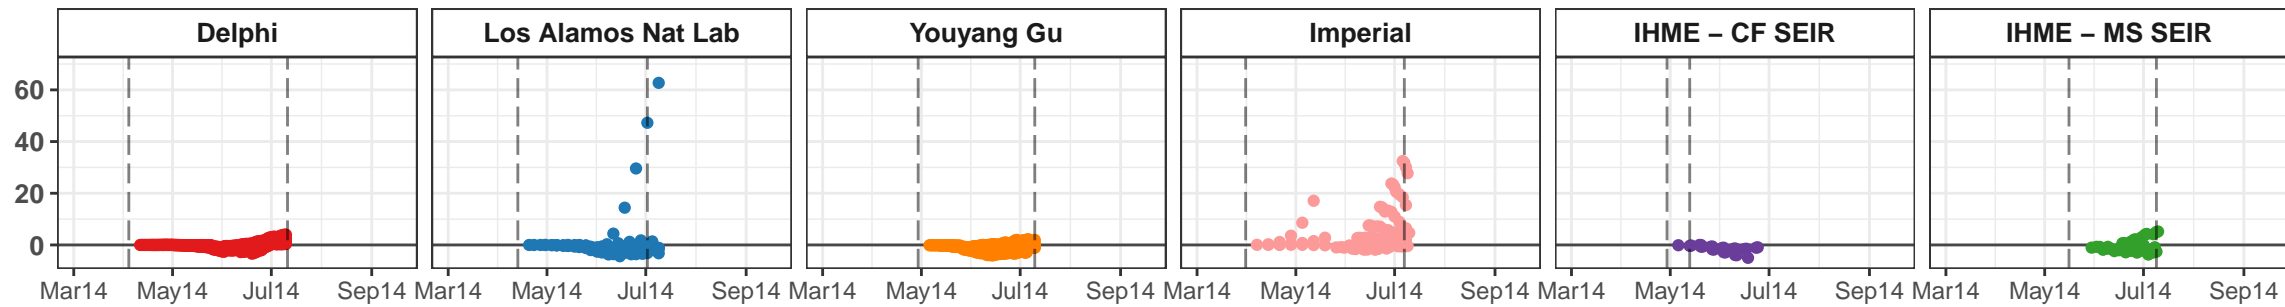

# Massachusetts

## Current Forecast

Delphi Los Alamos Nat Lab Youyang Gu IHME - MS SEIR JHU NYT

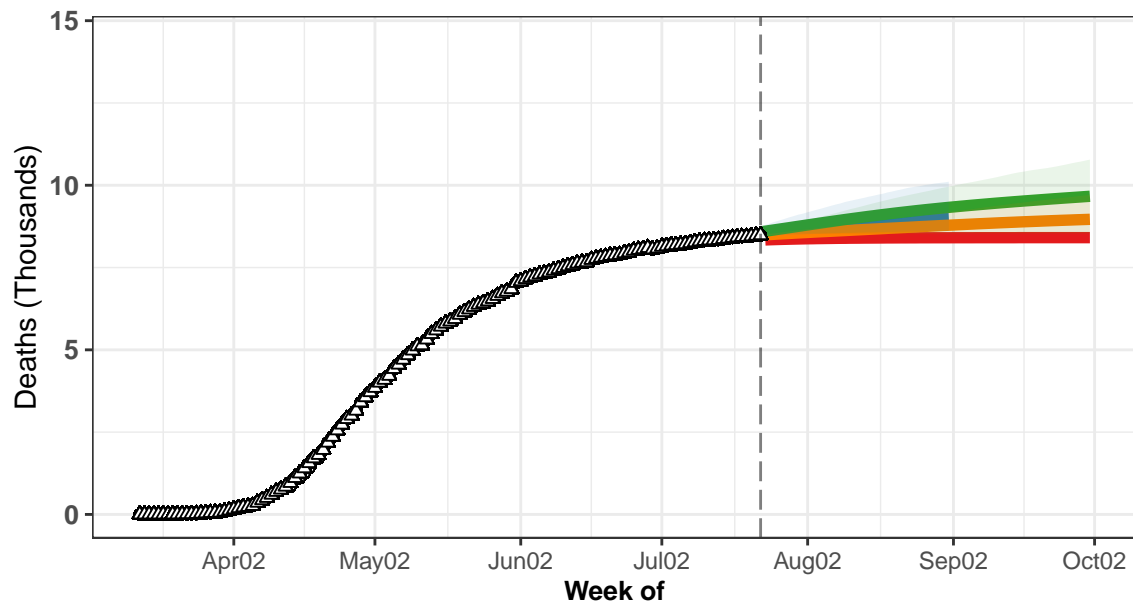

## Cumulative Out-Of-Sample Error (Post Intercept Shift)

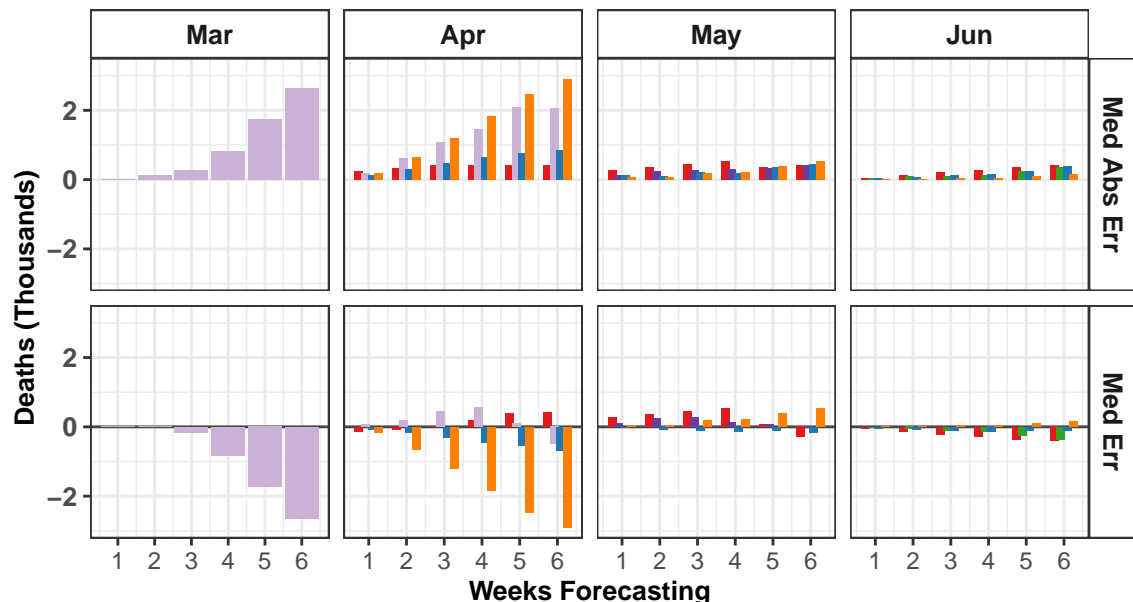

## All Model Versions

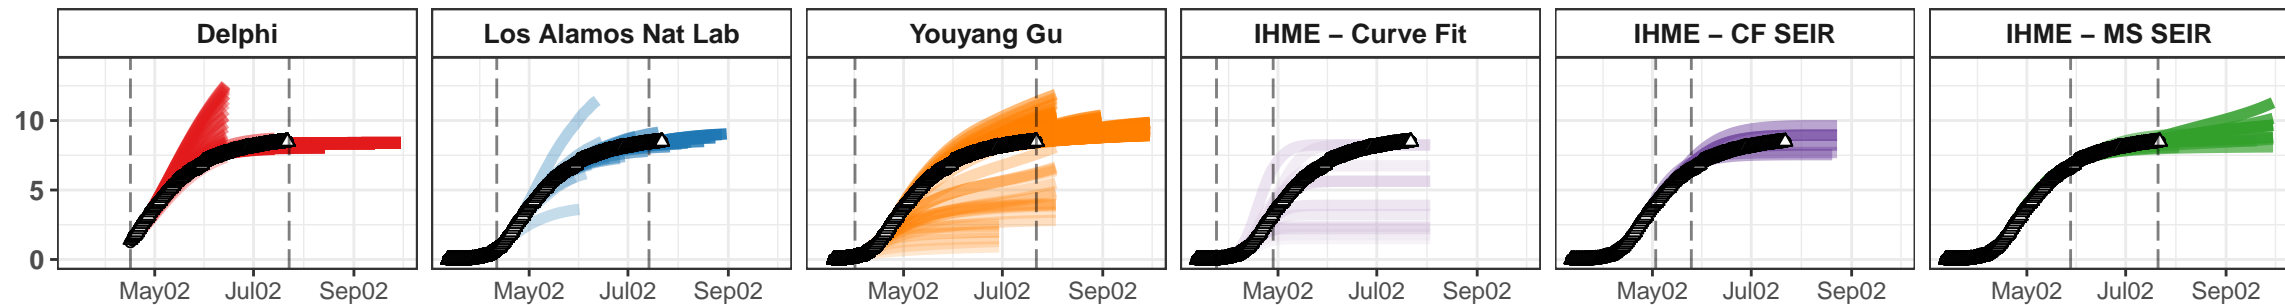

## All Cumulative Errors

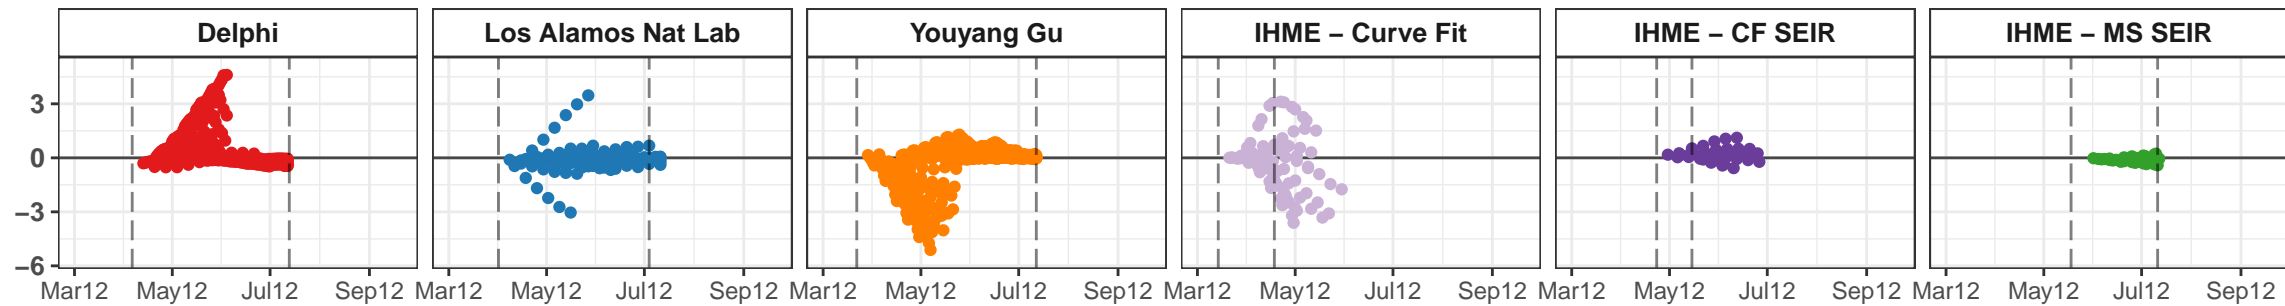

# California

## Current Forecast

Delphi Los Alamos Nat Lab Youyang Gu IHME - MS SEIR ○ JHU △ NYT

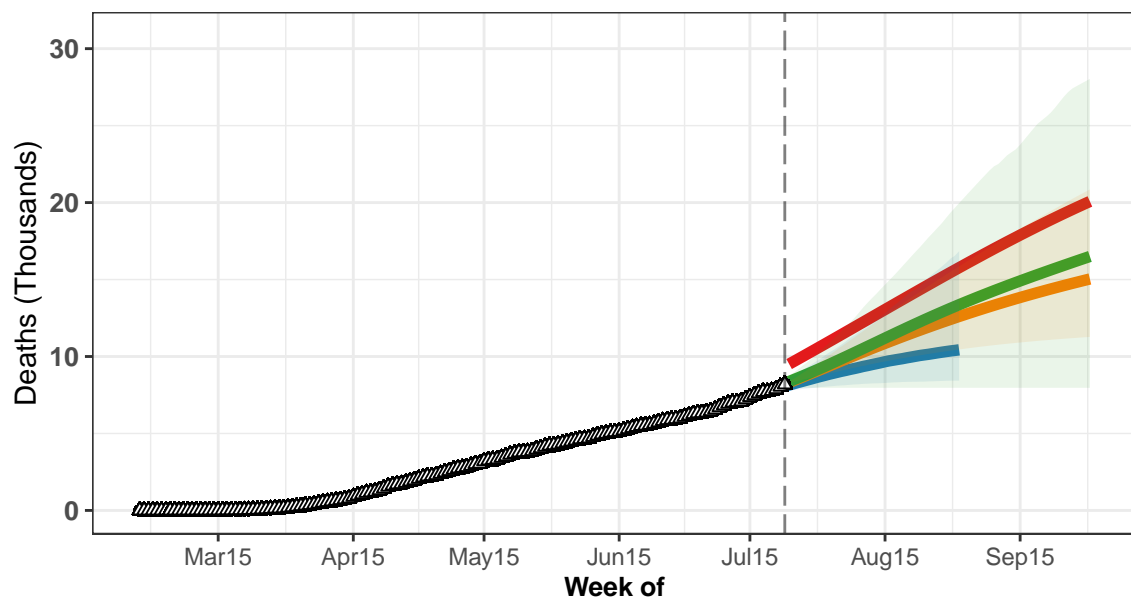

## Cumulative Out-Of-Sample Error (Post Intercept Shift)

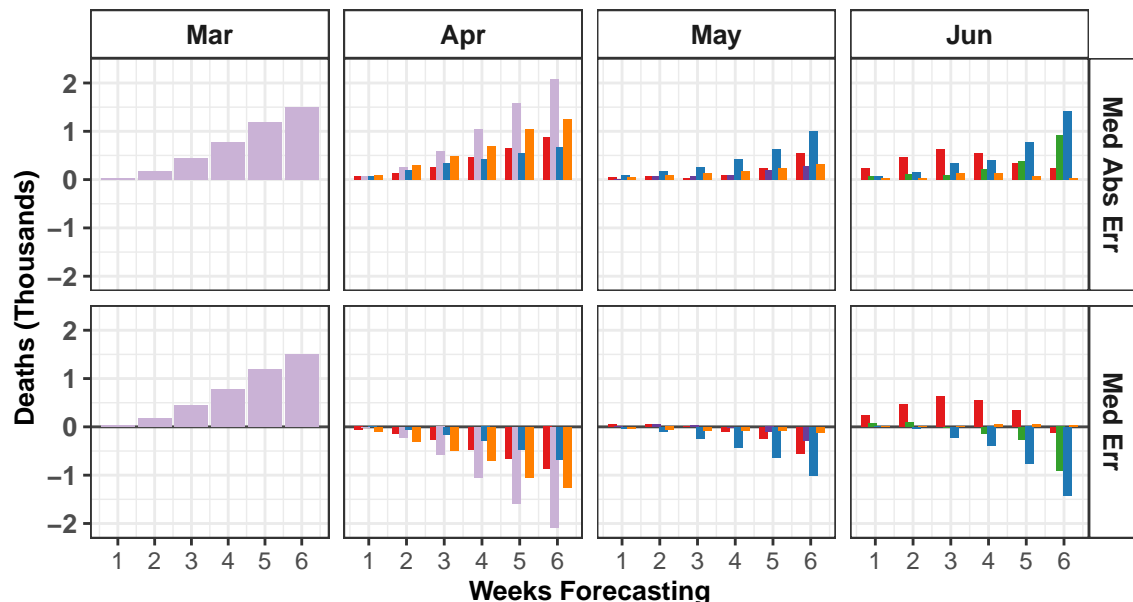

## All Model Versions

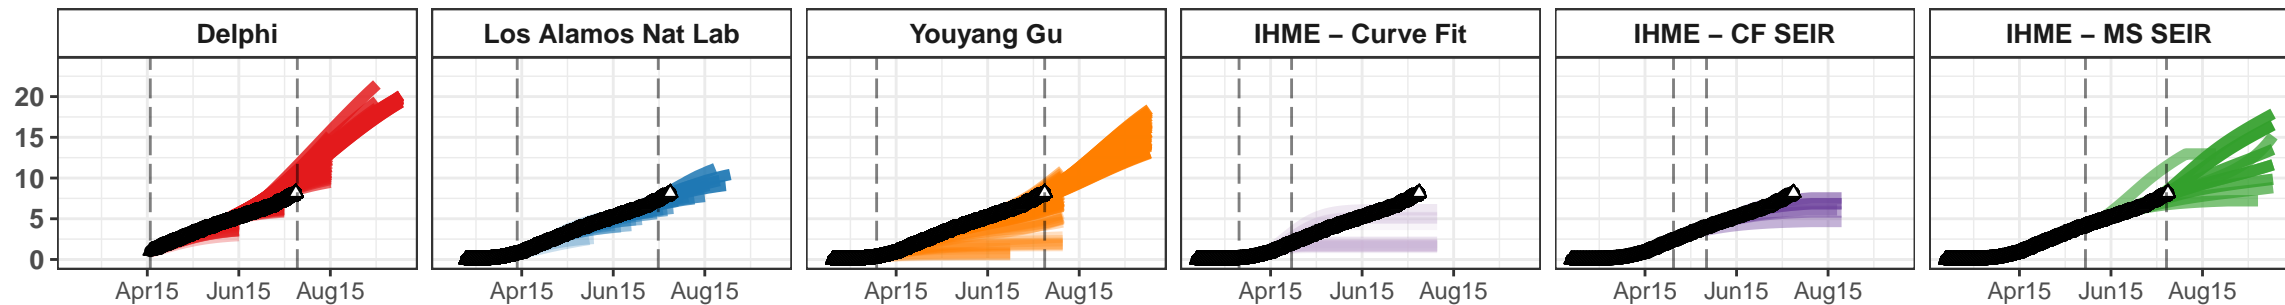

## All Cumulative Errors

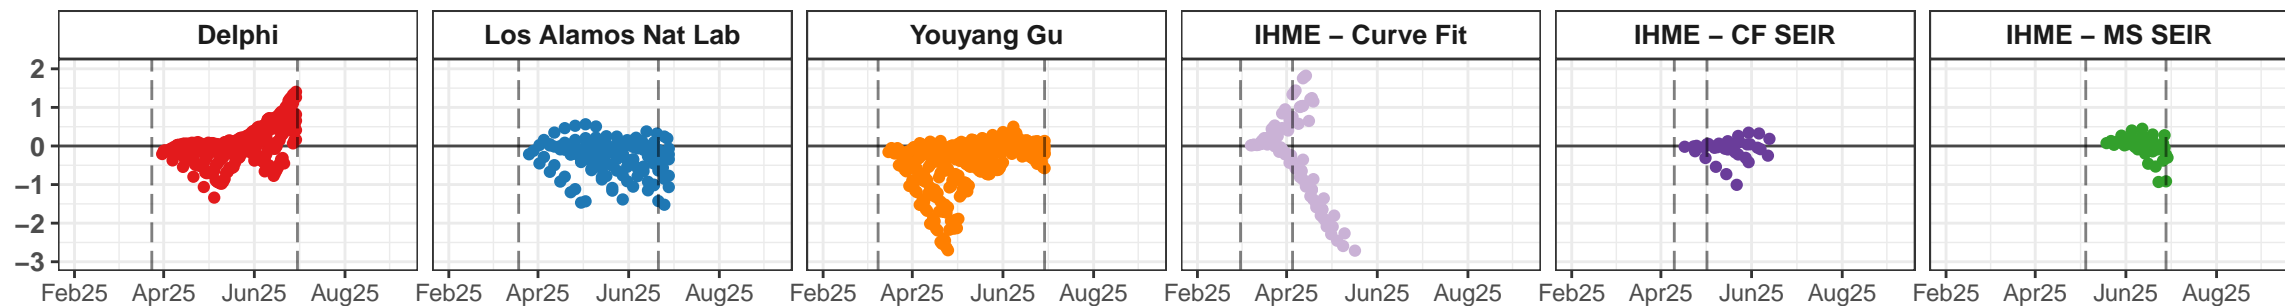

# Colombia

## Current Forecast

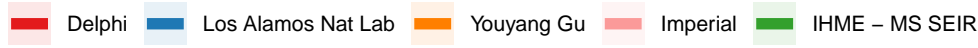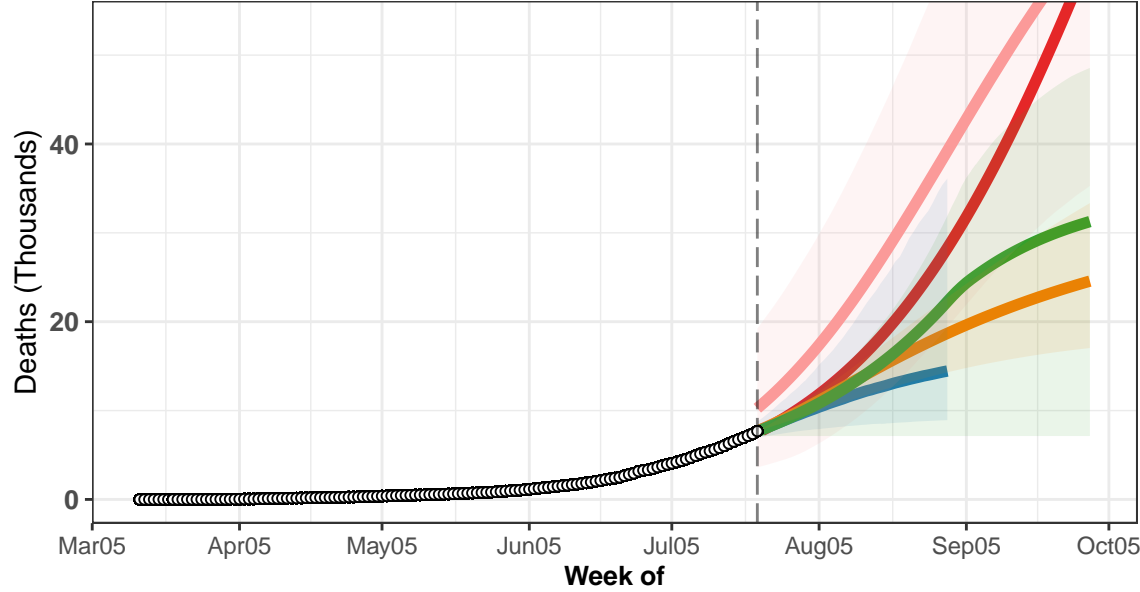

## Cumulative Out-Of-Sample Error (Post Intercept Shift)

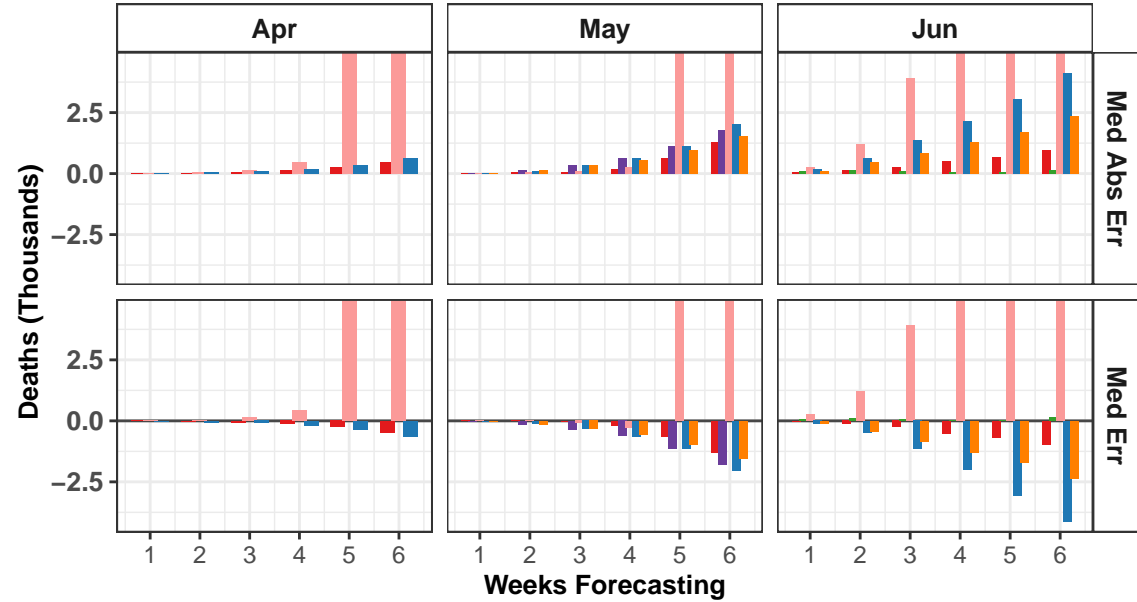

## All Model Versions

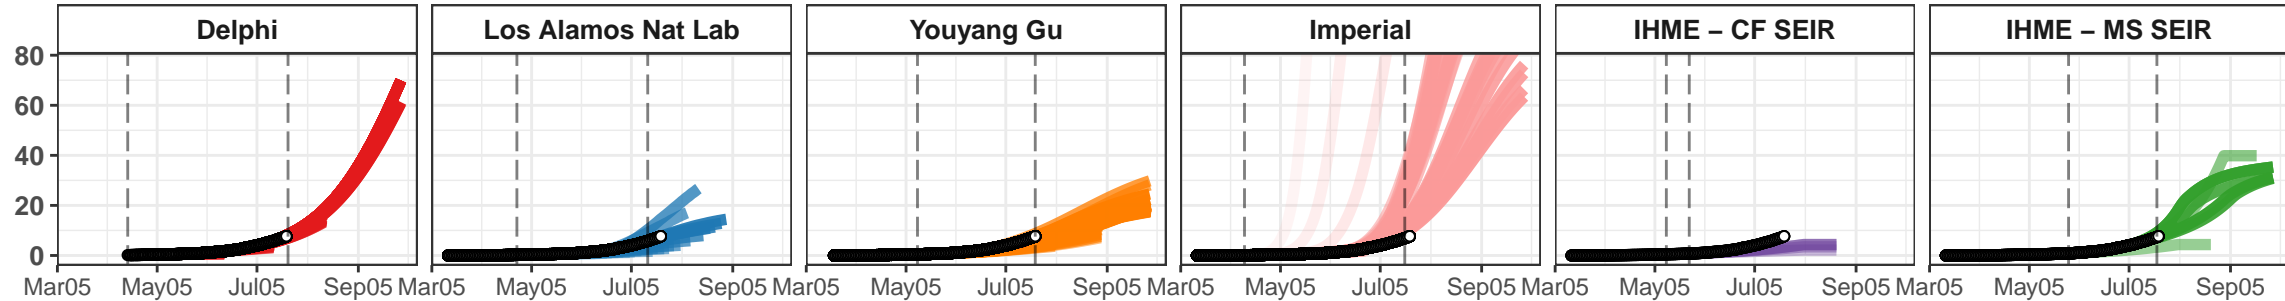

## All Cumulative Errors

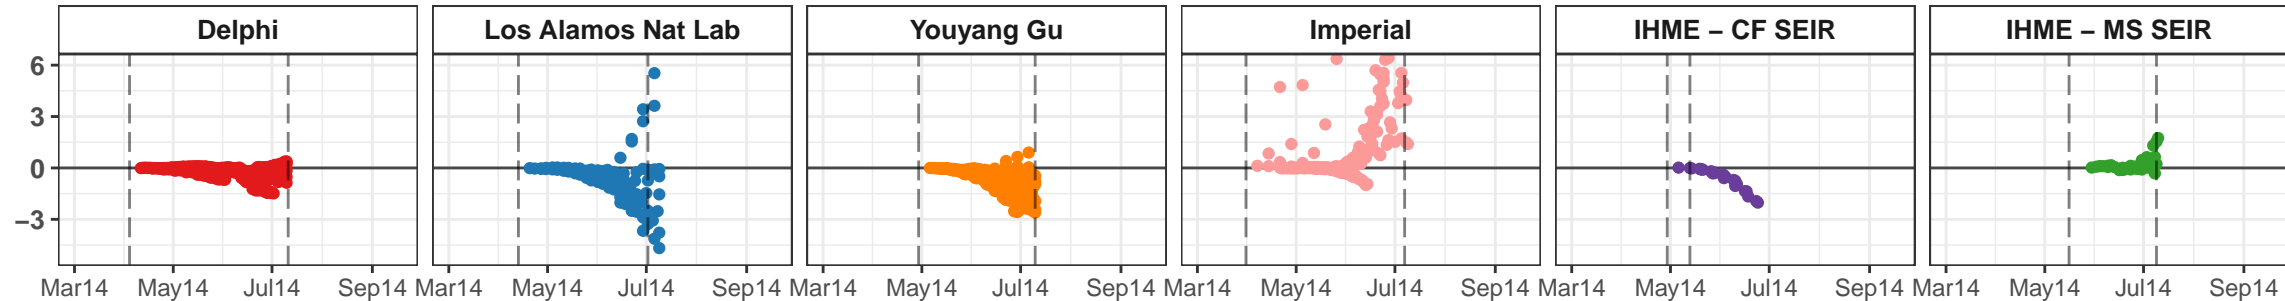

# Illinois

## Current Forecast

Delphi Los Alamos Nat Lab Youyang Gu IHME - MS SEIR ○ JHU △ NY

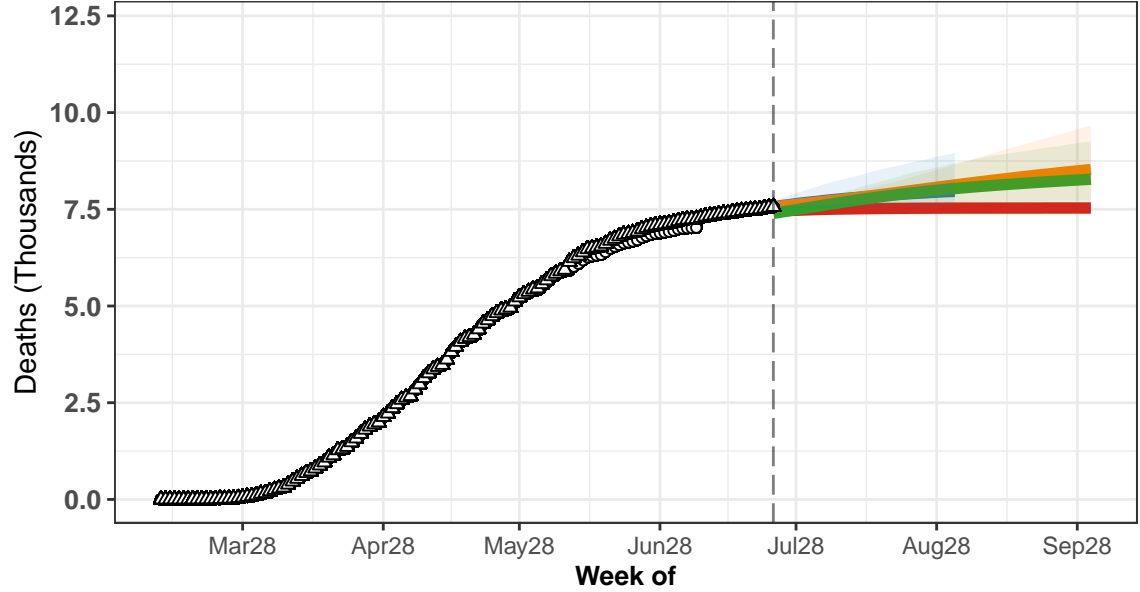

## Cumulative Out-Of-Sample Error (Post Intercept Shift)

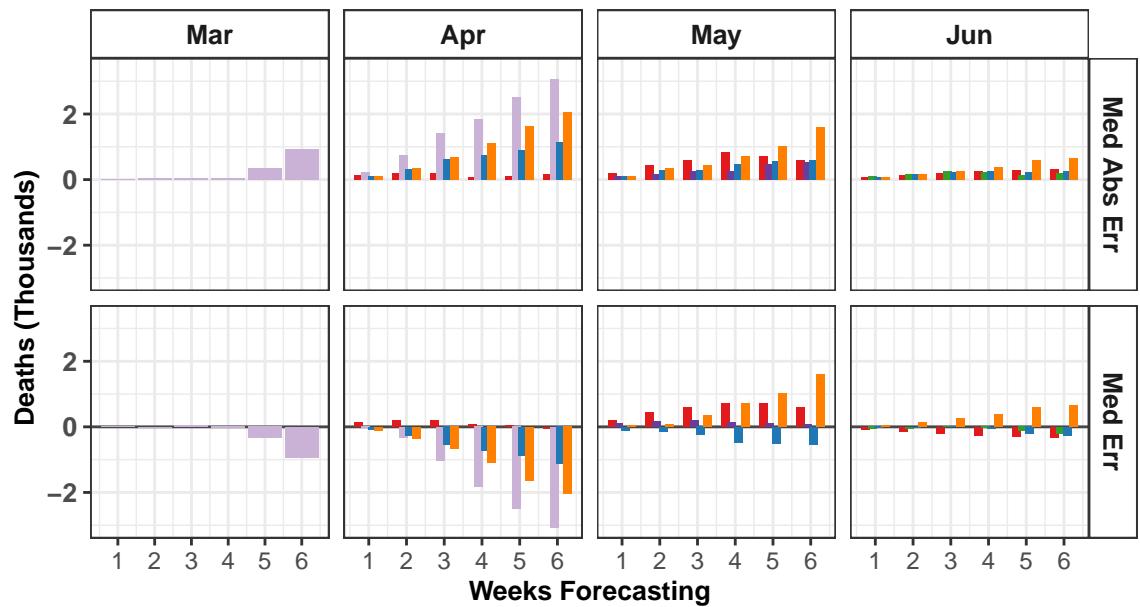

## All Model Versions

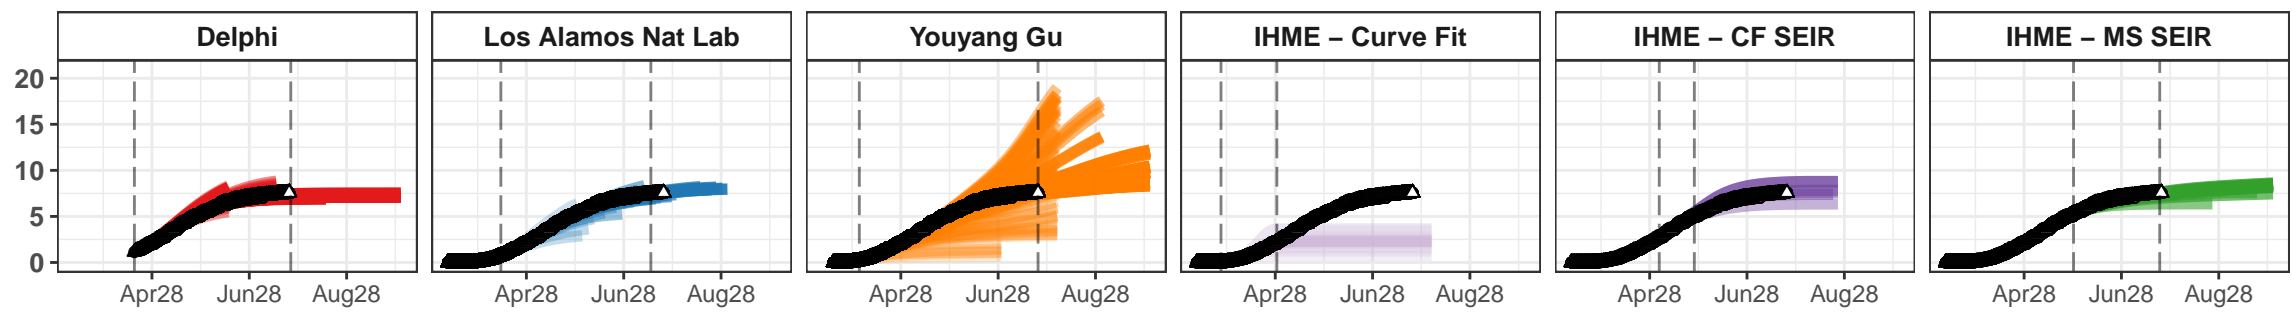

## All Cumulative Errors

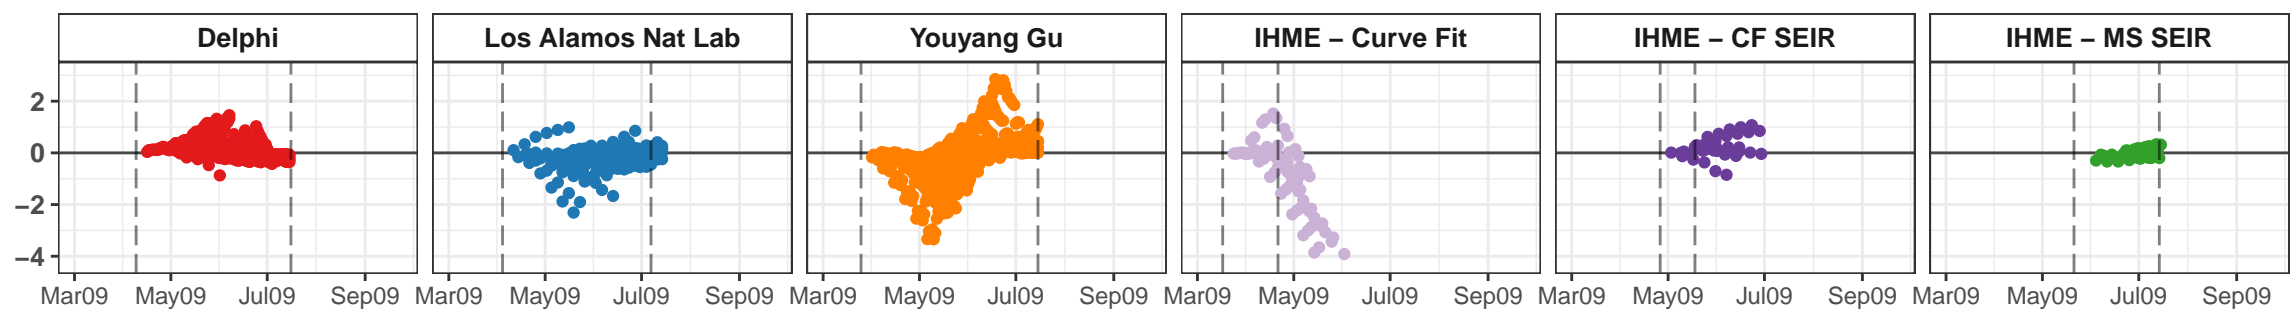



# Pennsylvania

## Current Forecast

Delphi Los Alamos Nat Lab Youyang Gu IHME - MS SEIR ○ JHU △ NYT

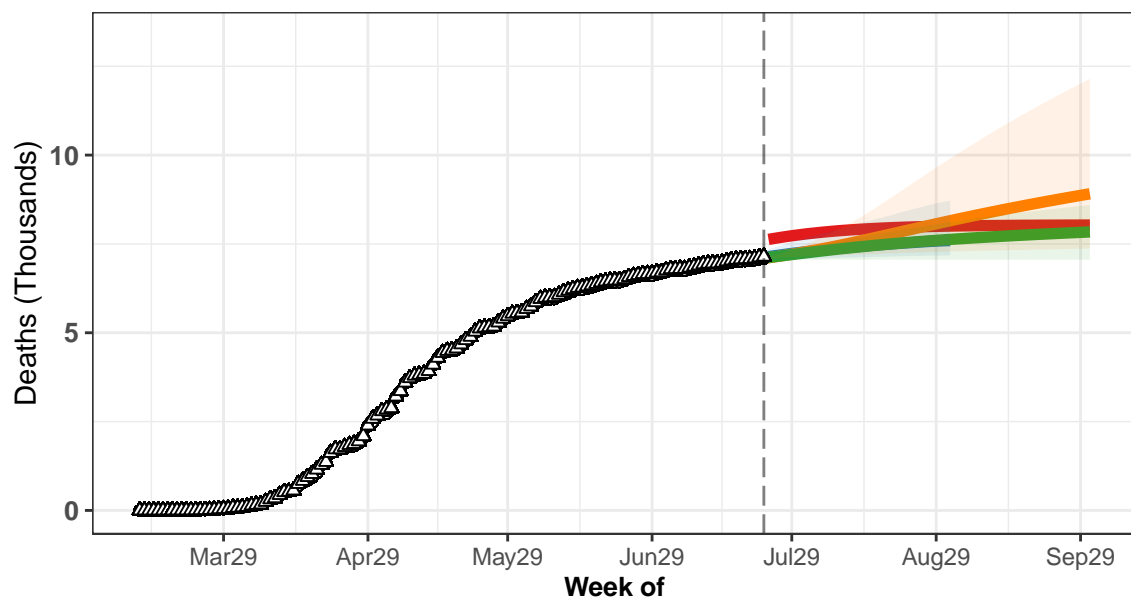

## Cumulative Out-Of-Sample Error (Post Intercept Shift)

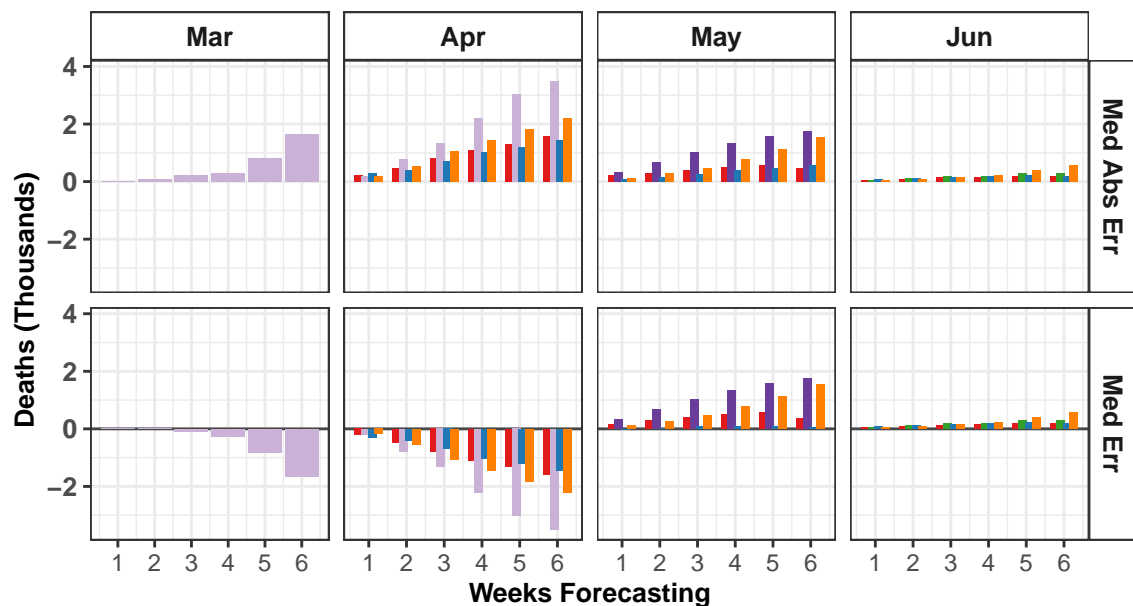

## All Model Versions

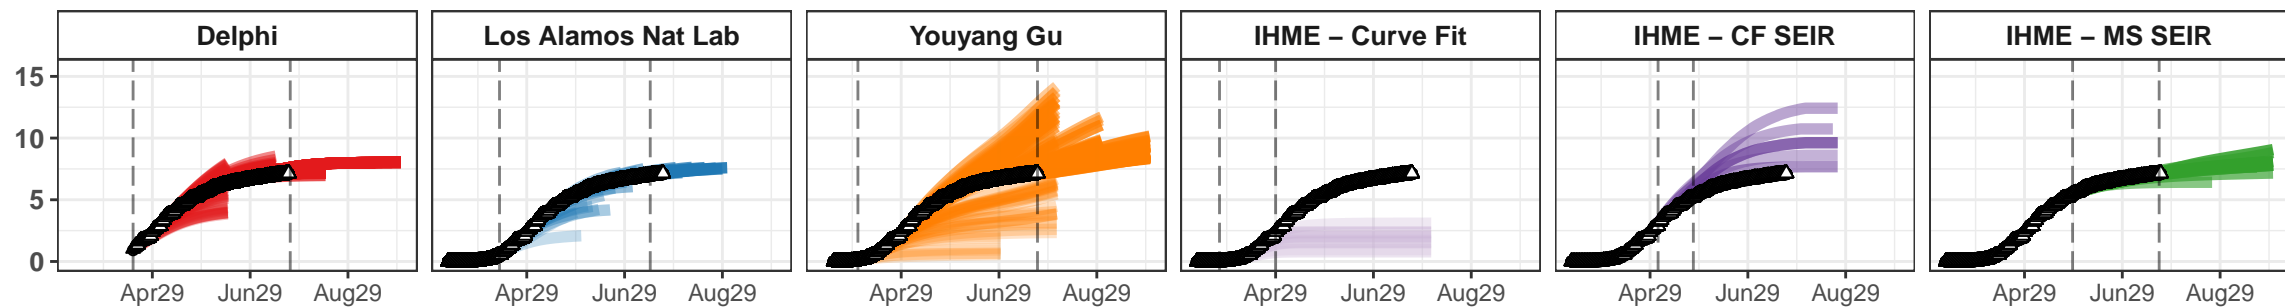

## All Cumulative Errors

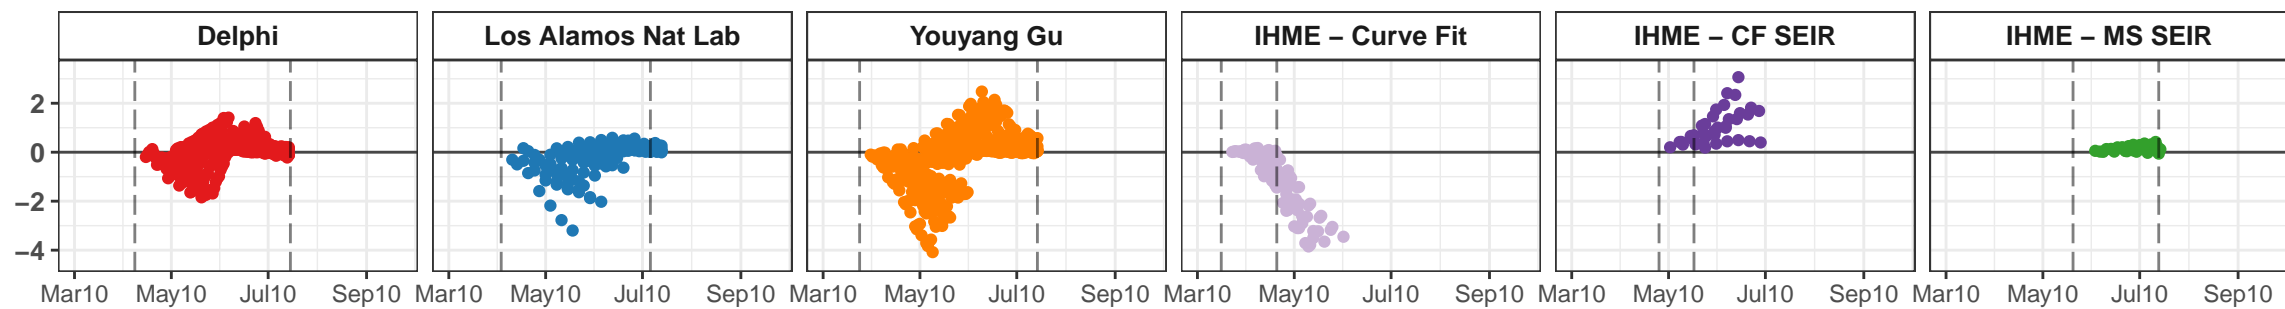

# Michigan

## Current Forecast

Delphi Los Alamos Nat Lab Youyang Gu IHME - MS SEIR ○ JHU △ NYT

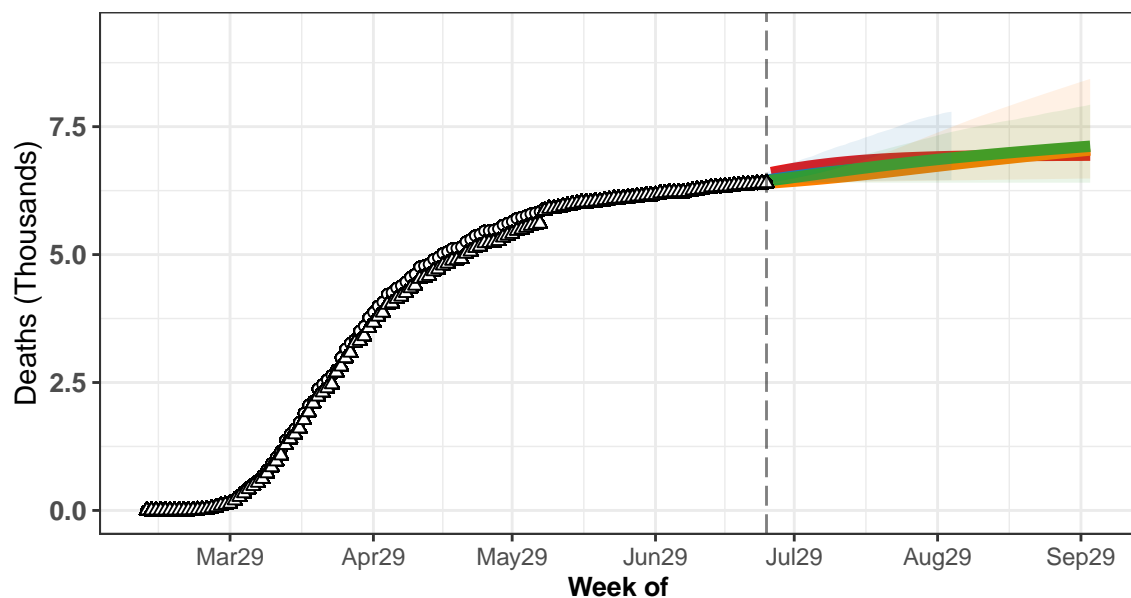

## Cumulative Out-Of-Sample Error (Post Intercept Shift)

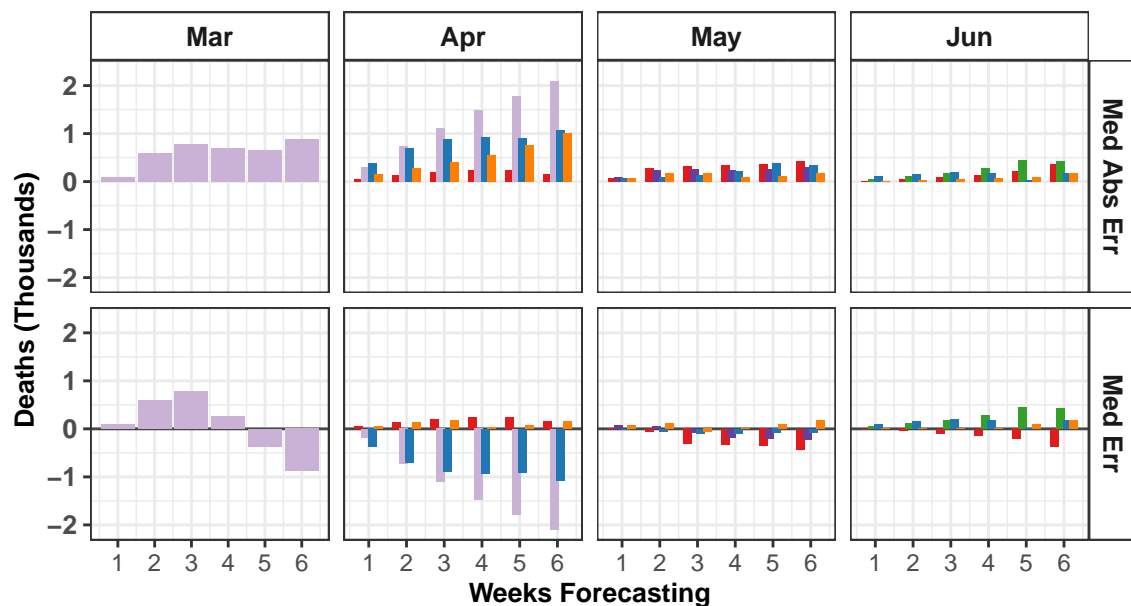

## All Model Versions

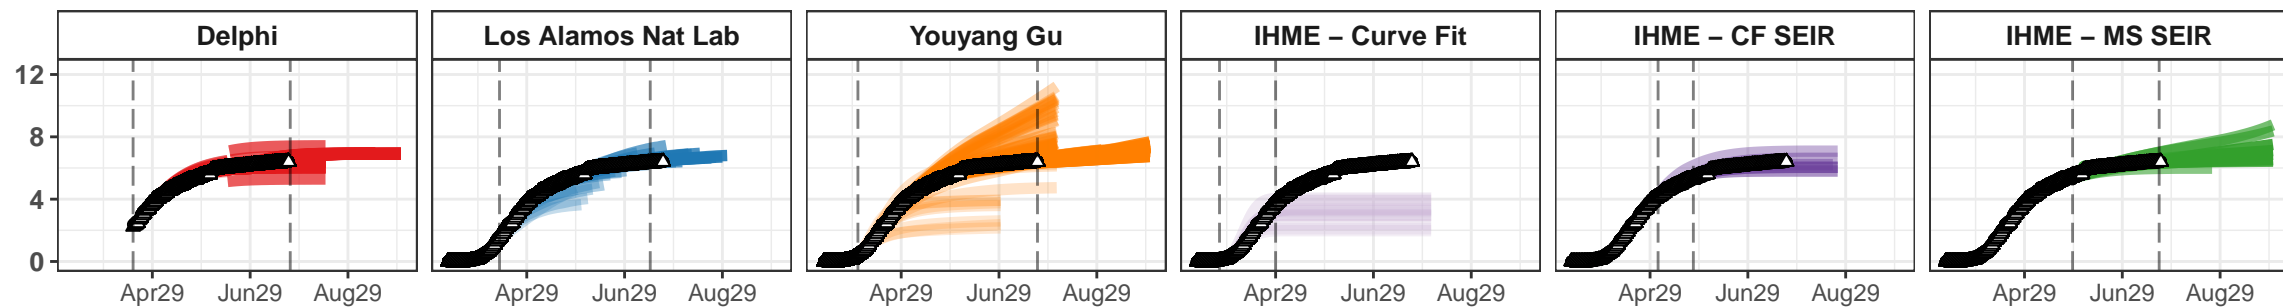

## All Cumulative Errors

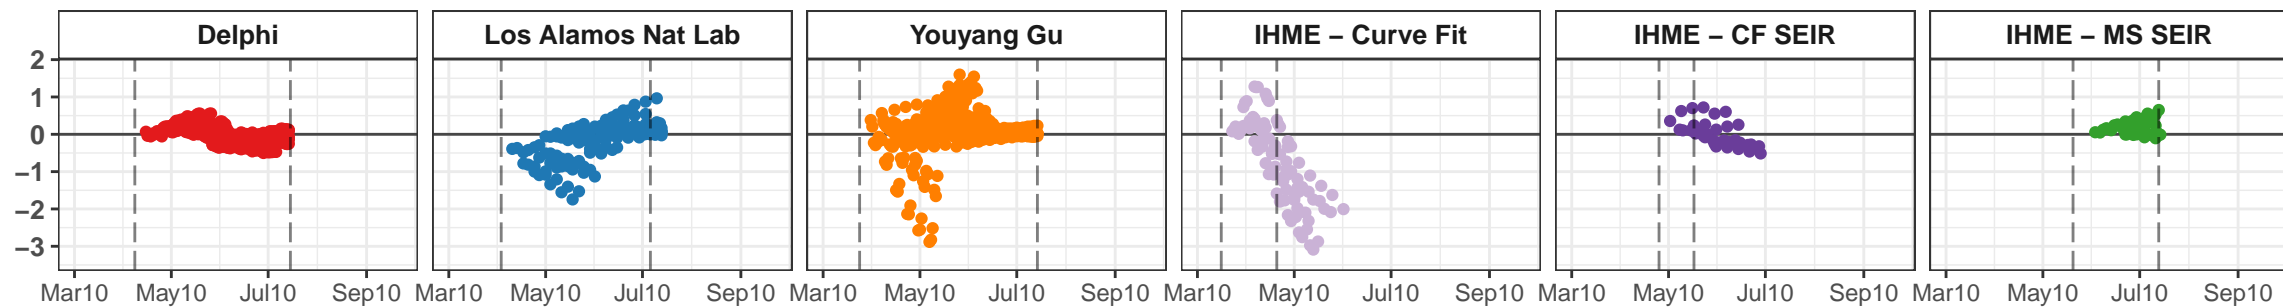

# Netherlands

## Current Forecast

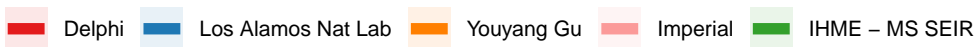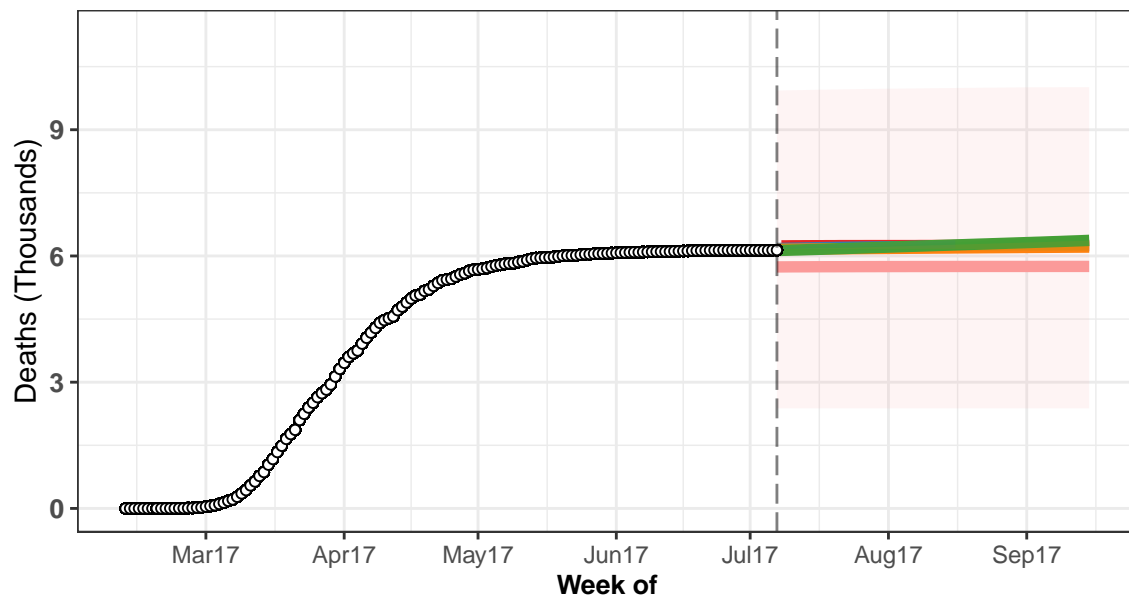

## Cumulative Out-Of-Sample Error (Post Intercept Shift)

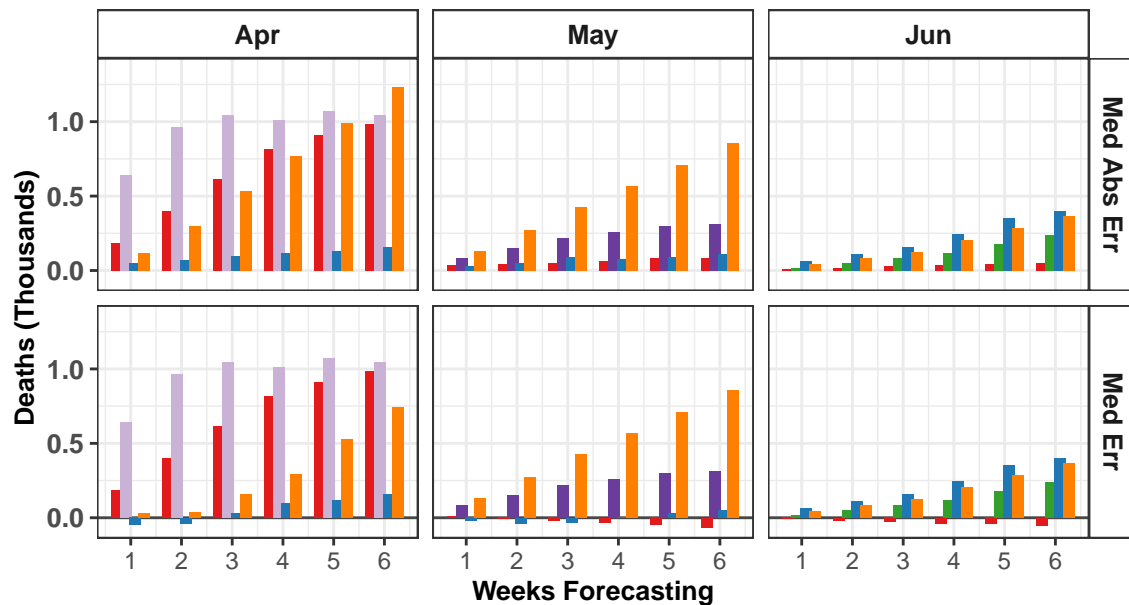

## All Model Versions

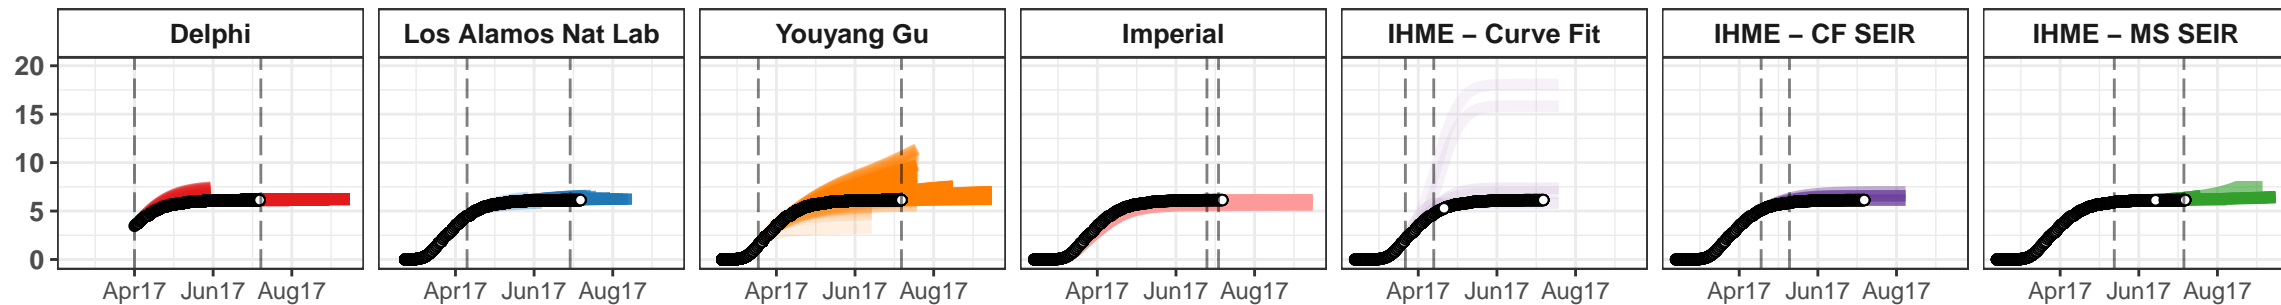

## All Cumulative Errors

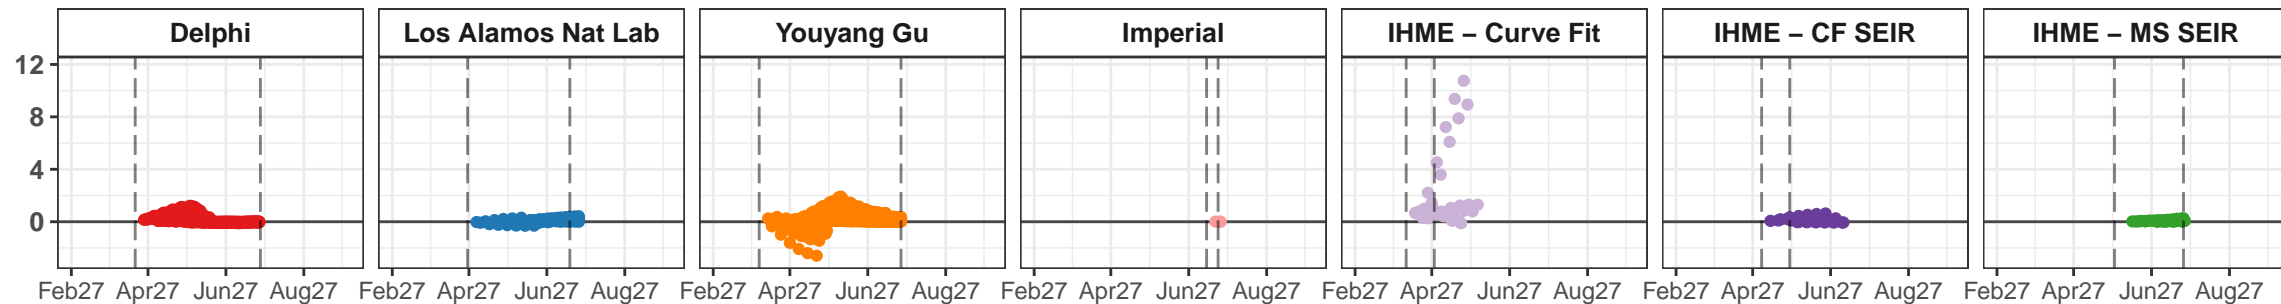

# South Africa

## Current Forecast

Delphi Los Alamos Nat Lab Youyang Gu Imperial

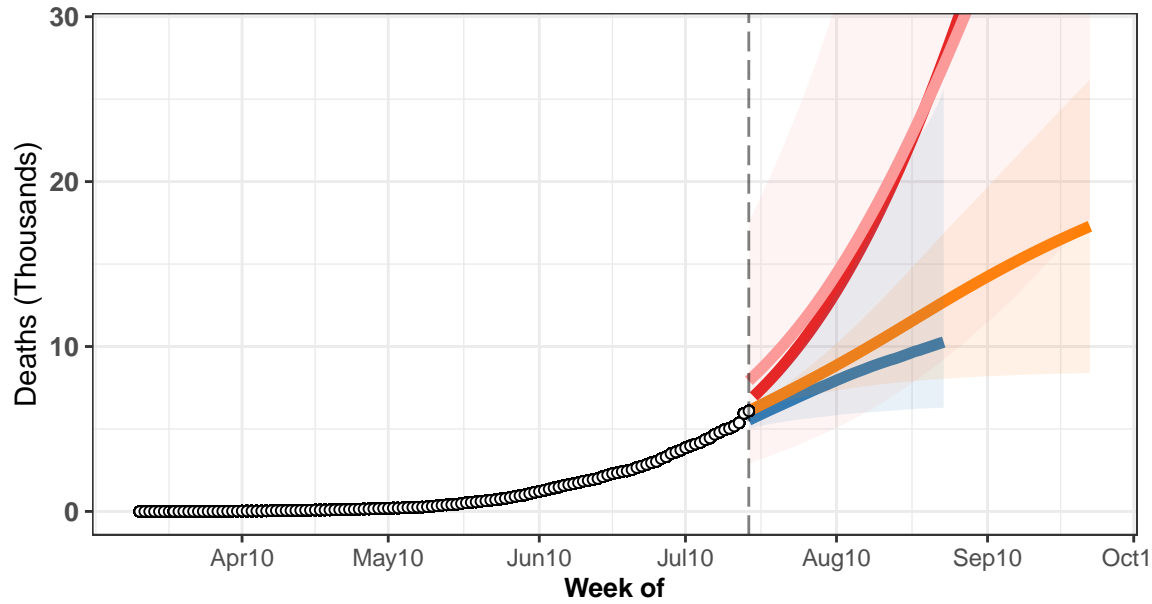

## Cumulative Out-Of-Sample Error (Post Intercept Shift)

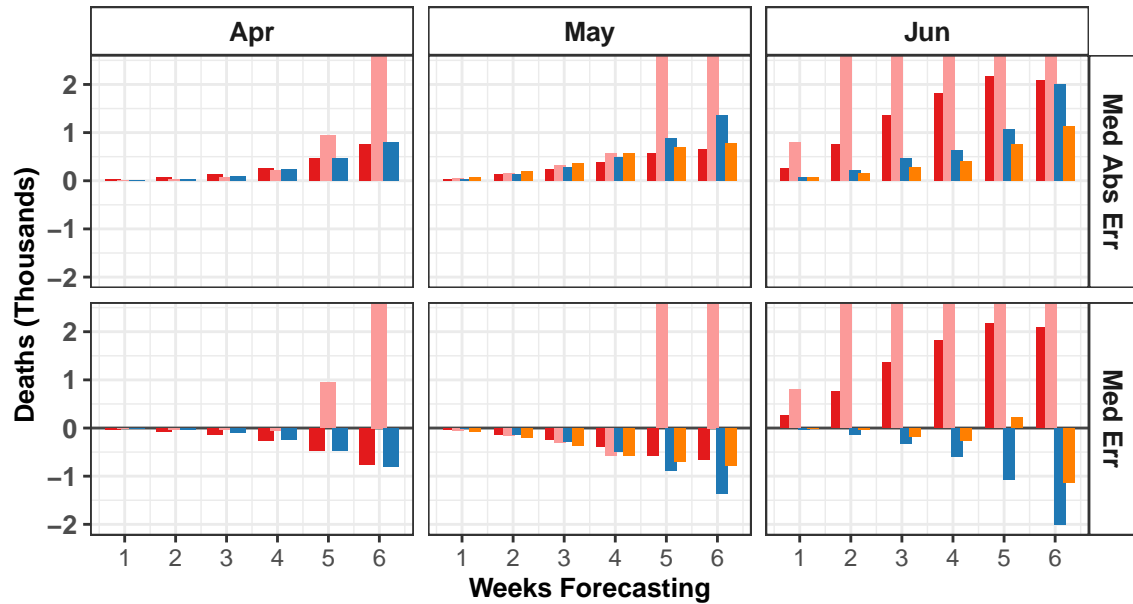

## All Model Versions

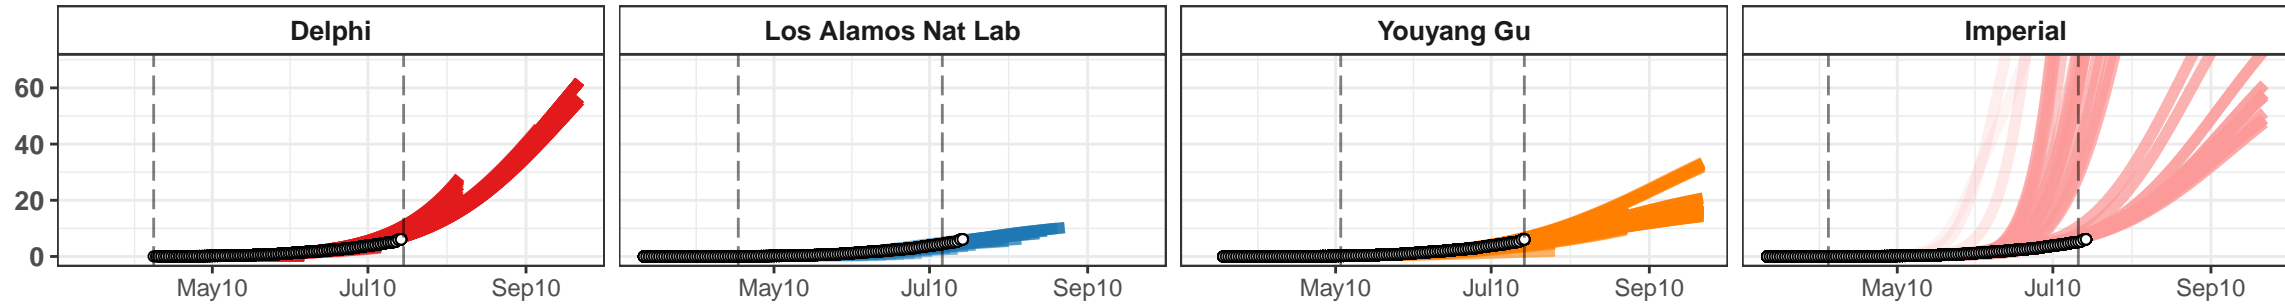

## All Cumulative Errors

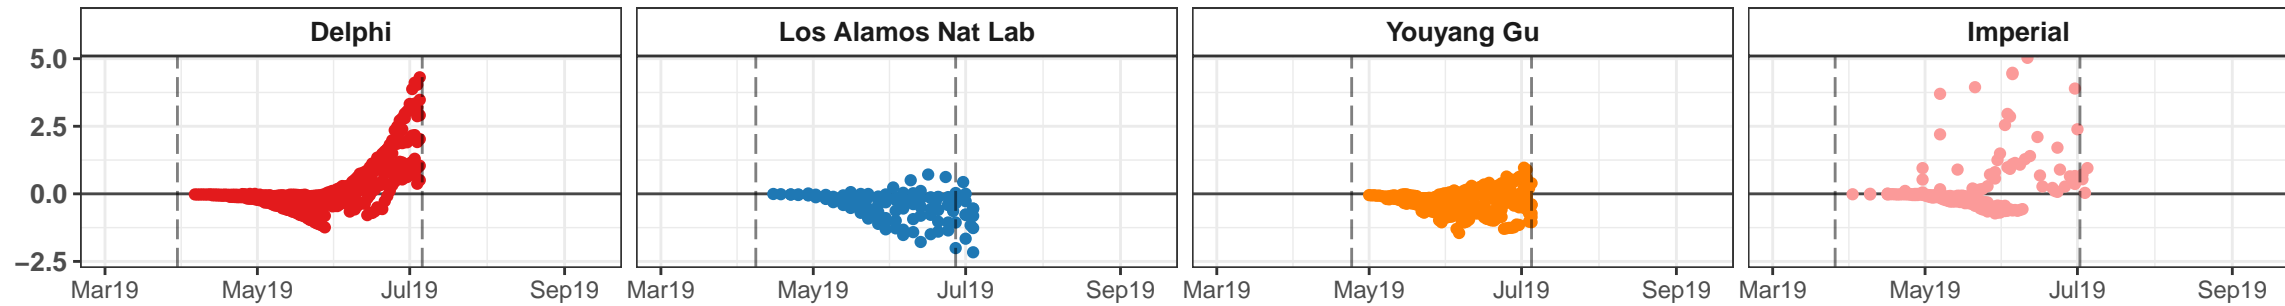

# Pakistan

## Current Forecast

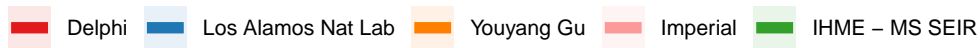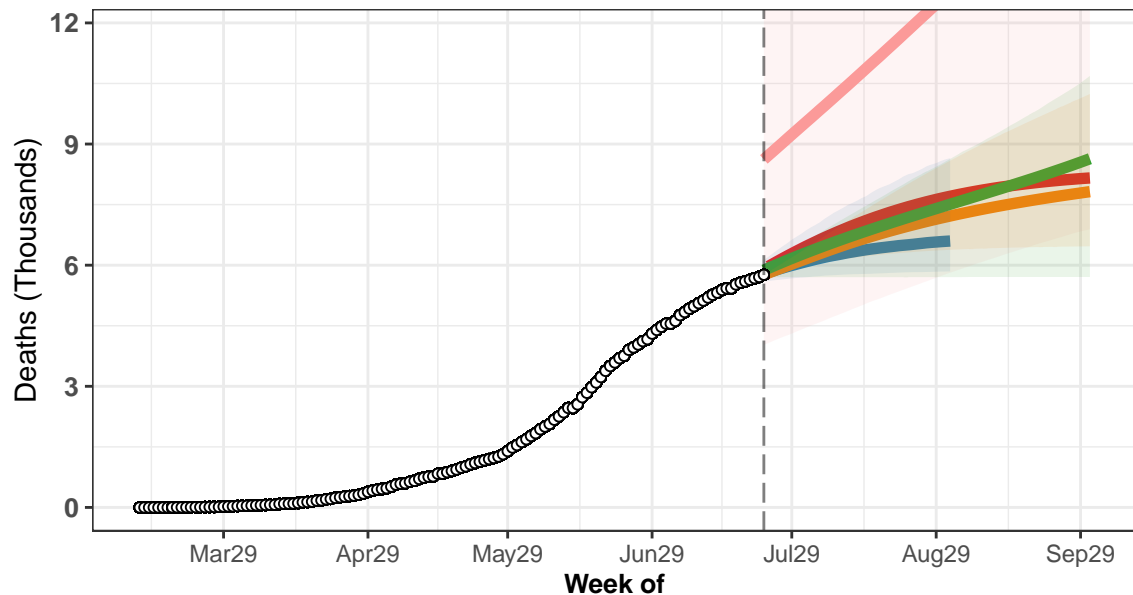

## Cumulative Out-Of-Sample Error (Post Intercept Shift)

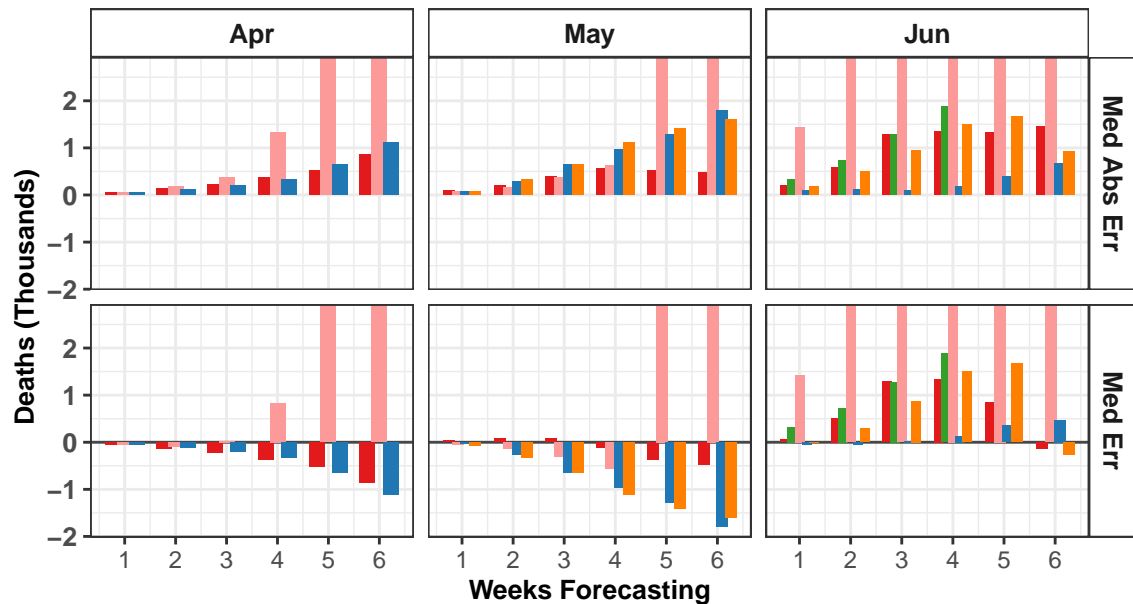

## All Model Versions

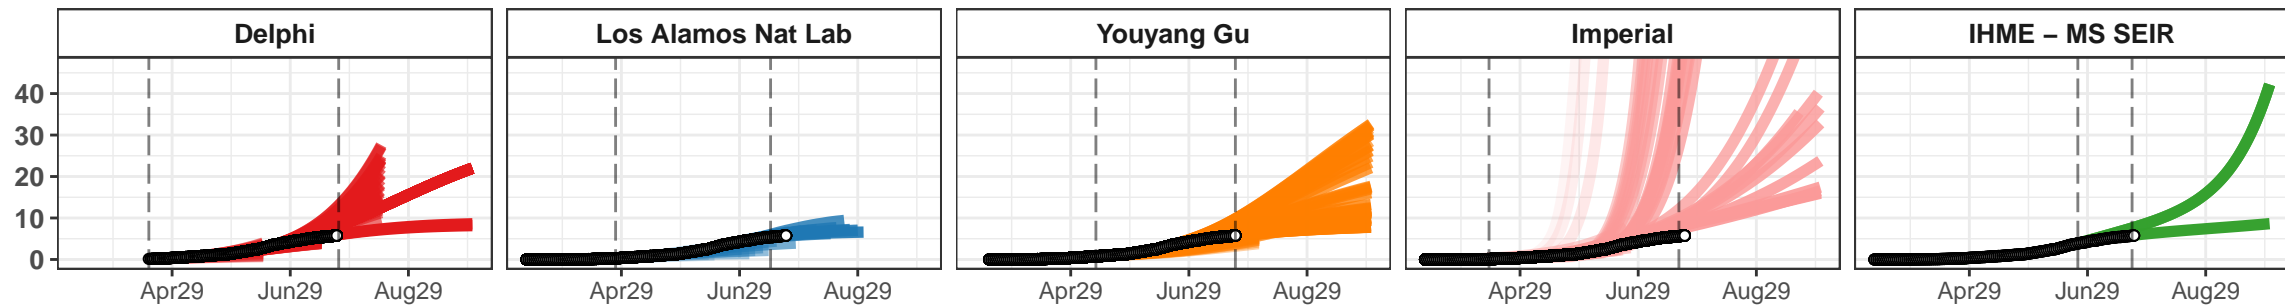

## All Cumulative Errors

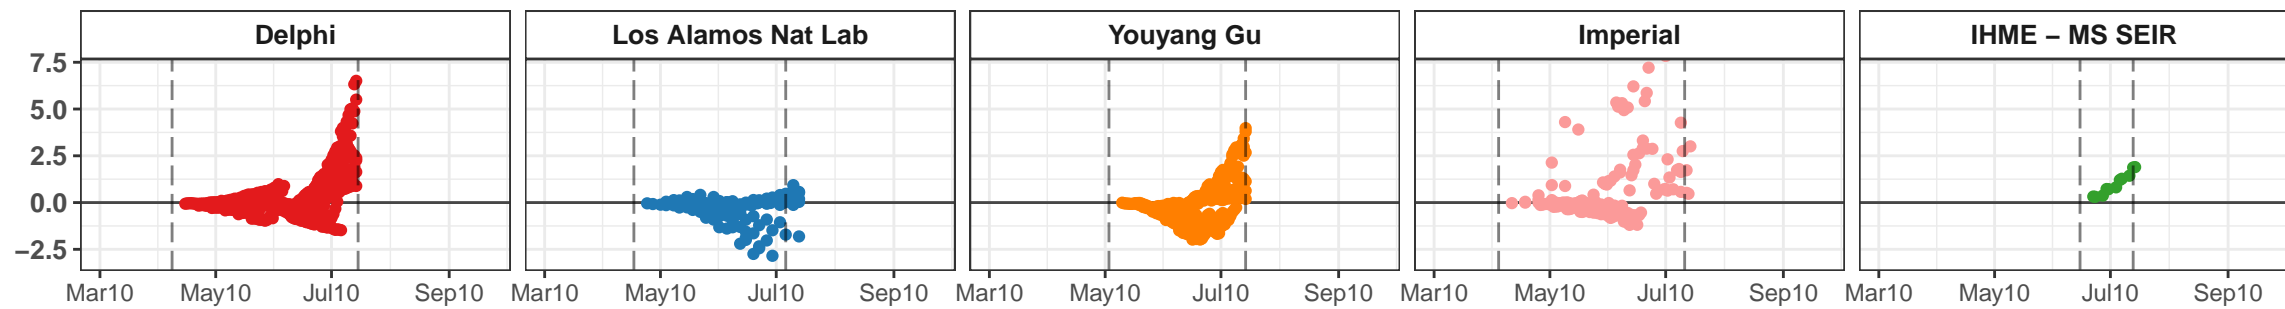

# Sweden

## Current Forecast

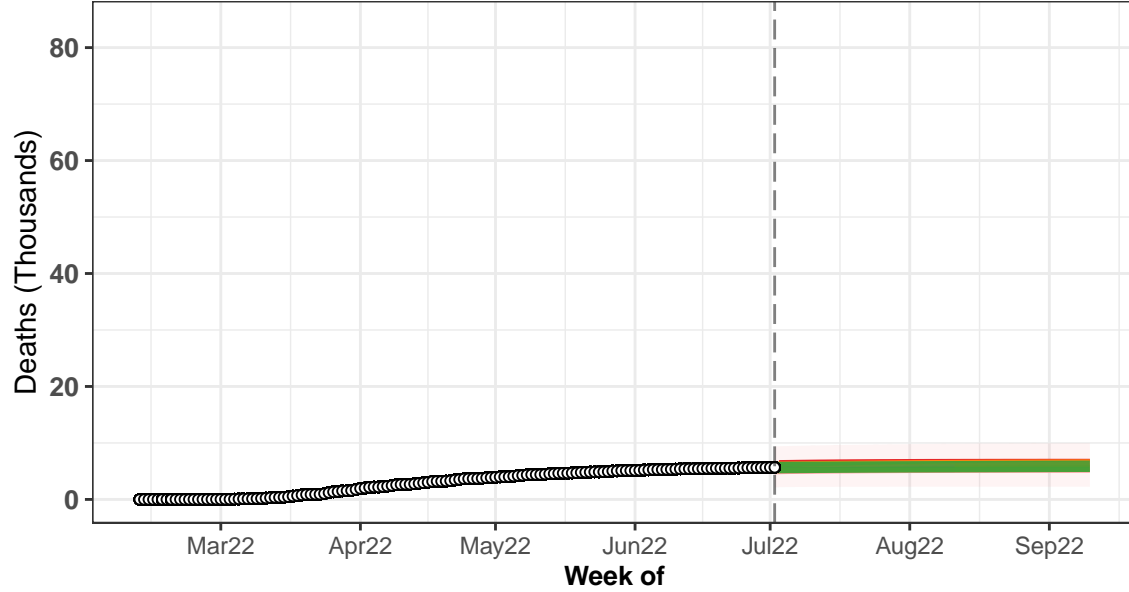

## Cumulative Out-Of-Sample Error (Post Intercept Shift)

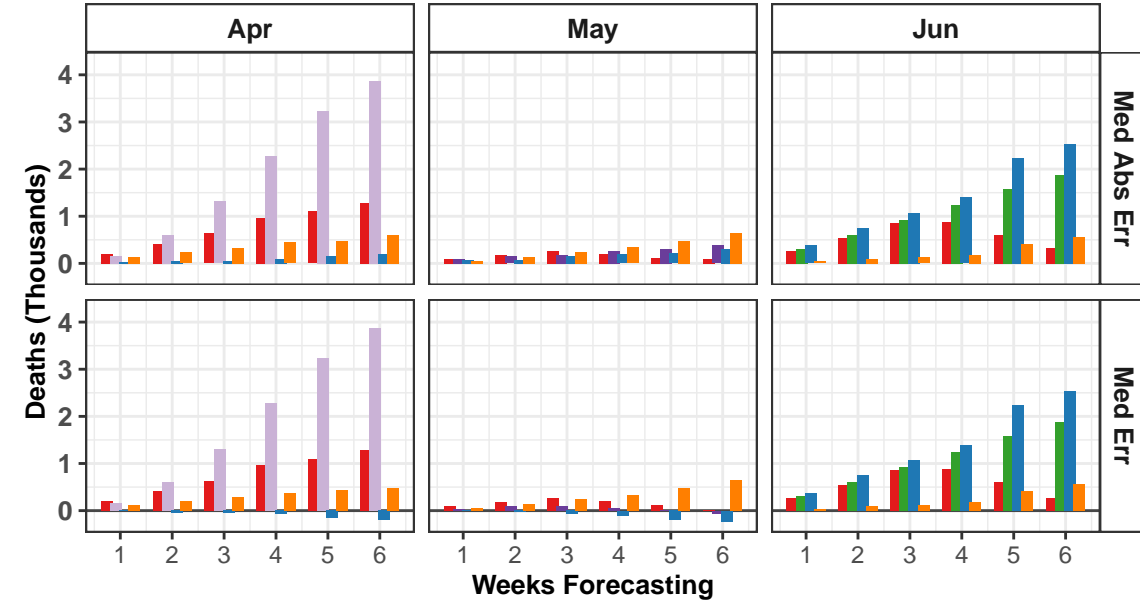

## All Model Versions

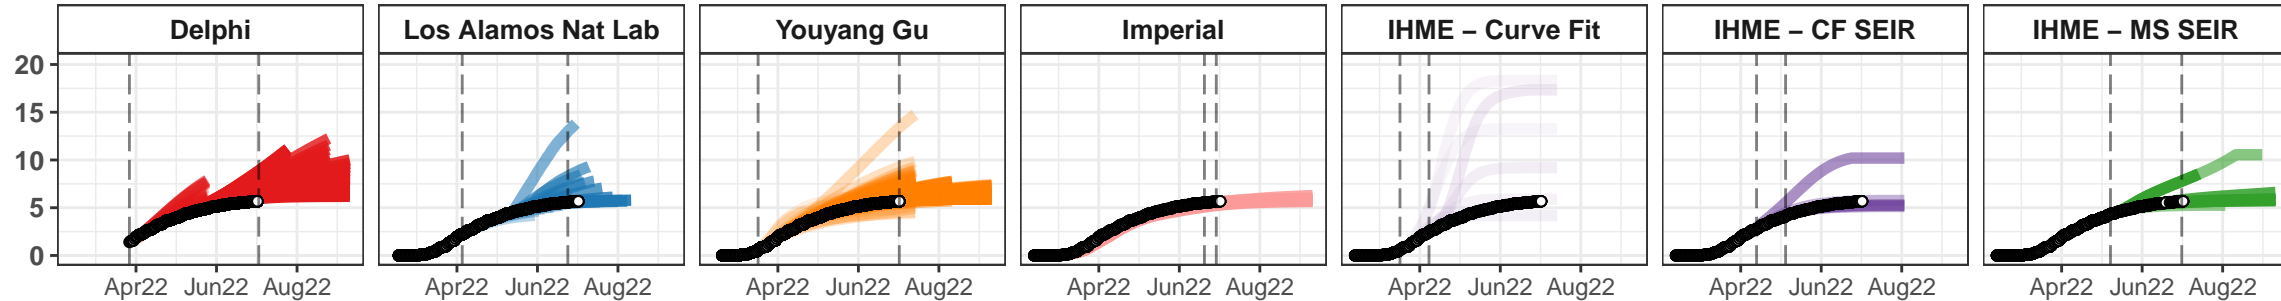

## All Cumulative Errors

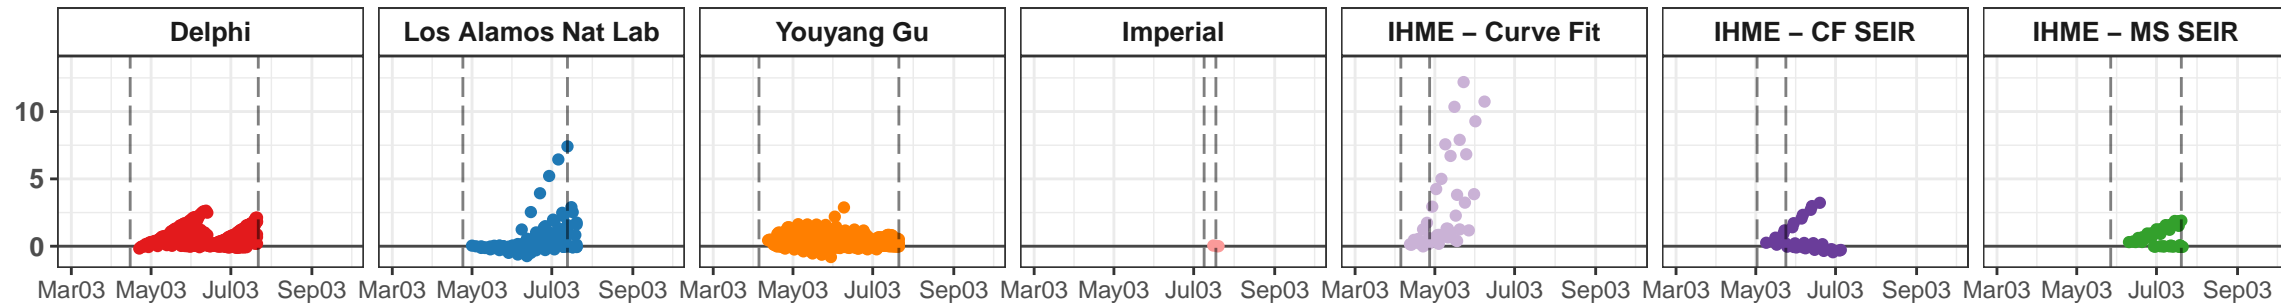

# Turkey

## Current Forecast

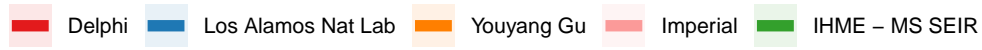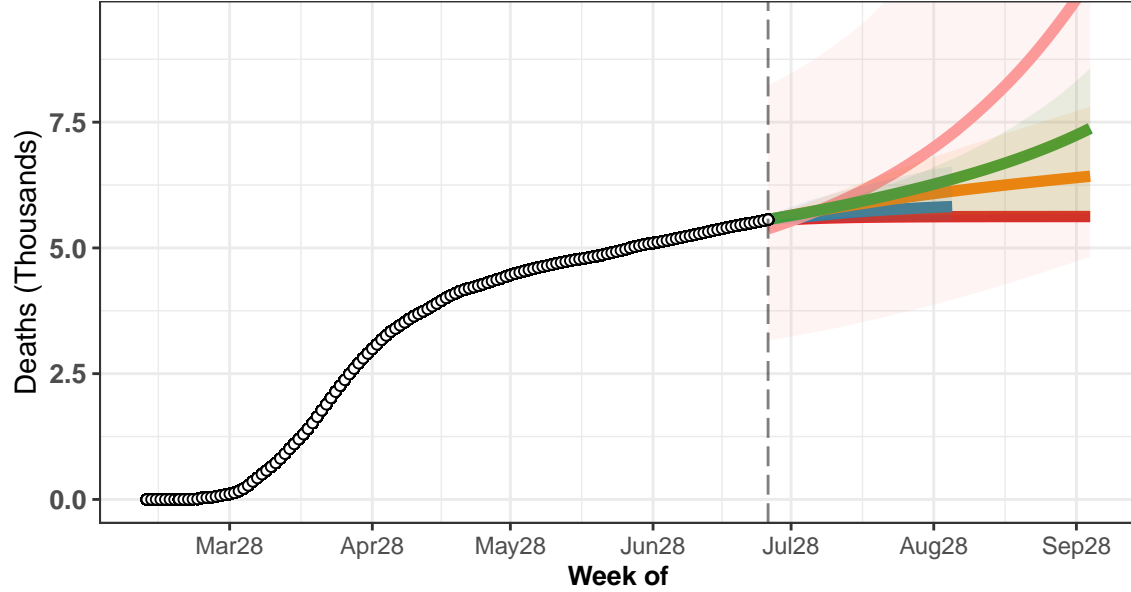

## Cumulative Out-Of-Sample Error (Post Intercept Shift)

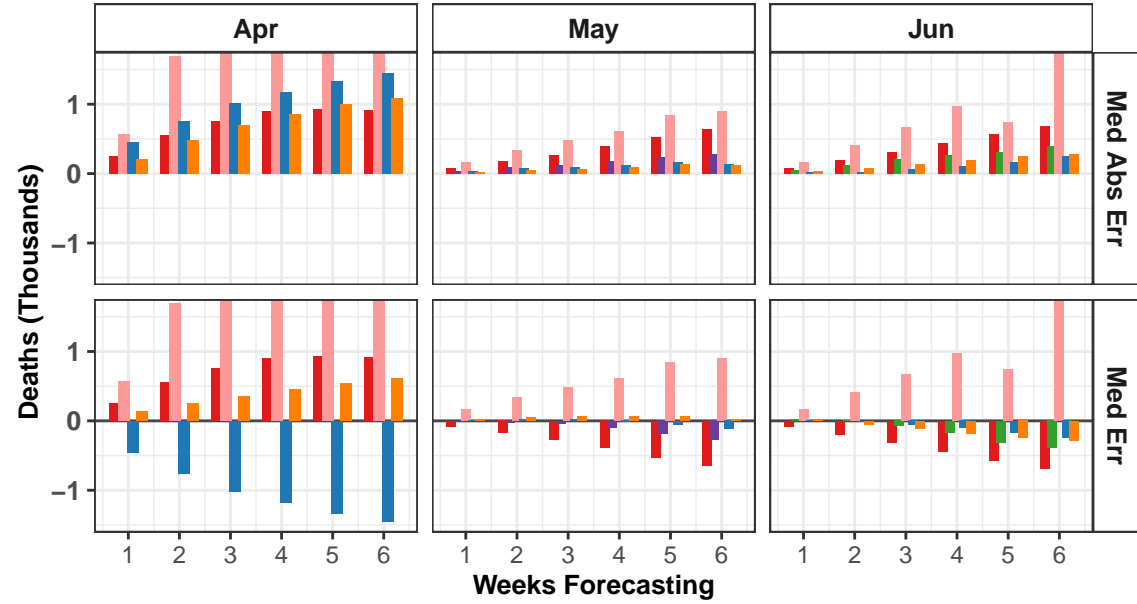

## All Model Versions

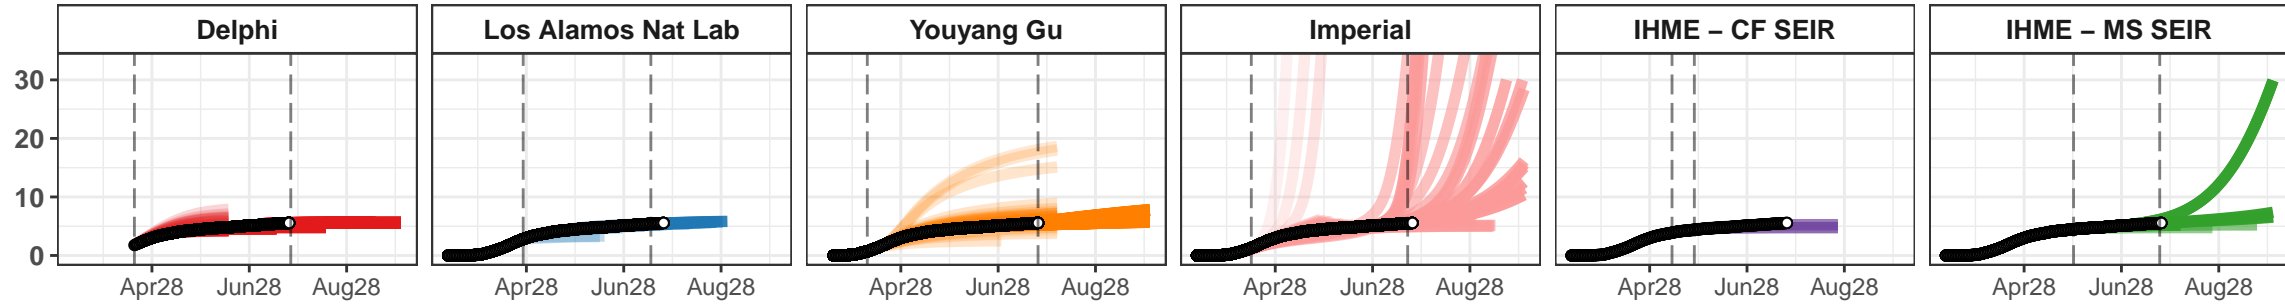

## All Cumulative Errors

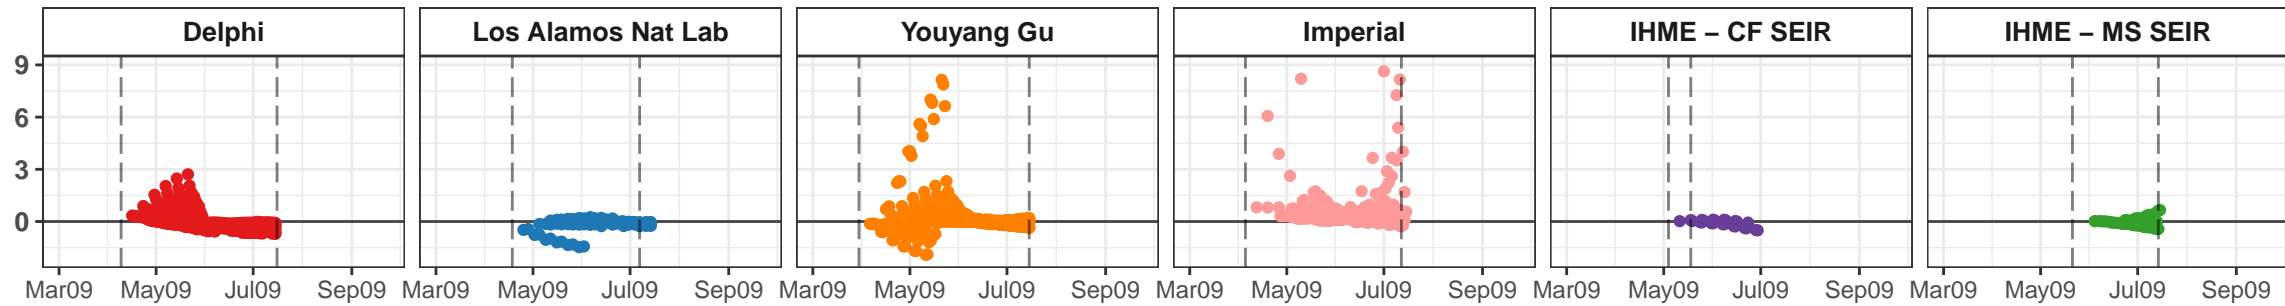

# Florida

## Current Forecast

Delphi Los Alamos Nat Lab Youyang Gu IHME - MS SEIR JHU NYT

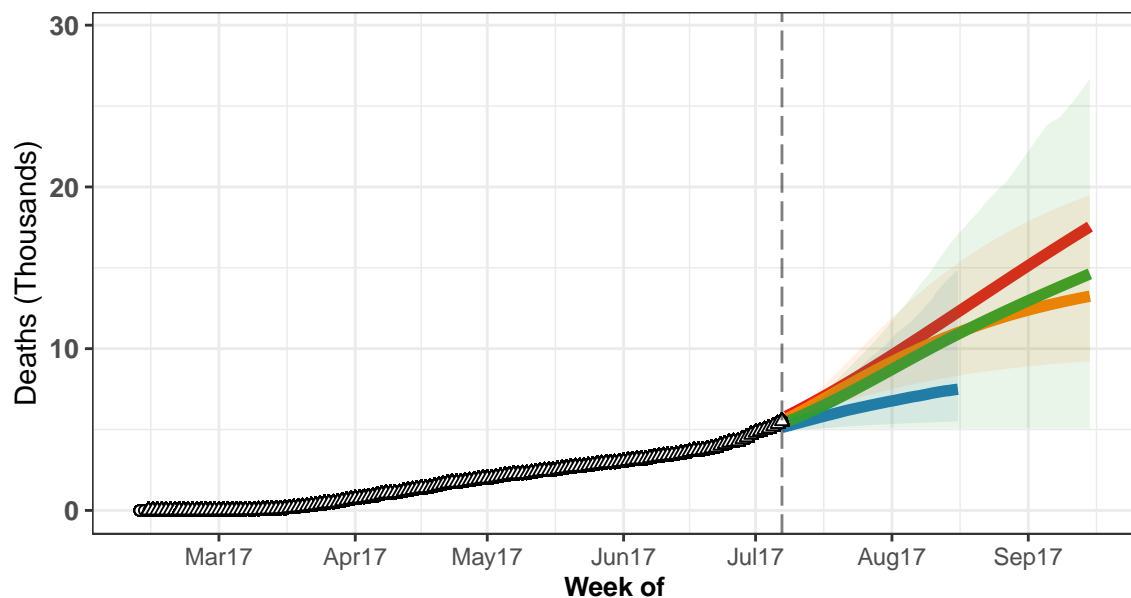

## Cumulative Out-Of-Sample Error (Post Intercept Shift)

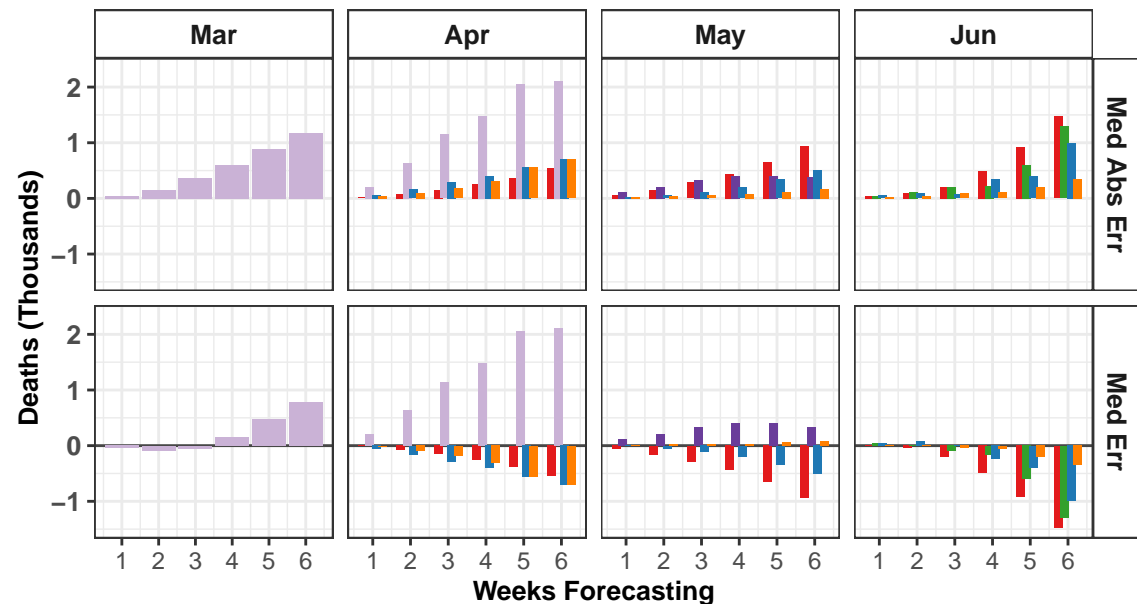

## All Model Versions

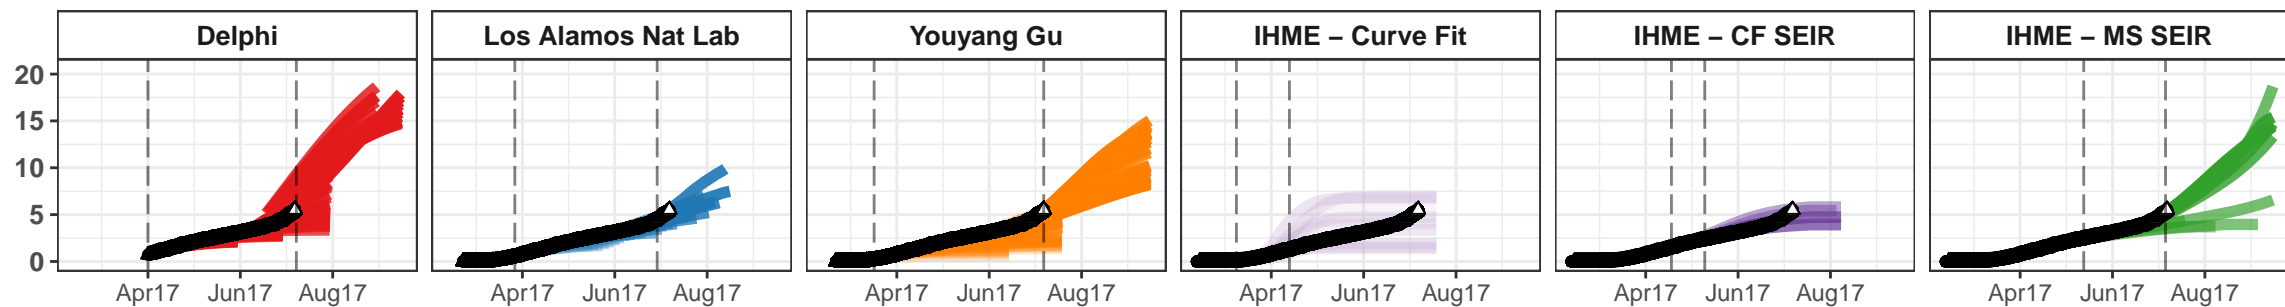

## All Cumulative Errors

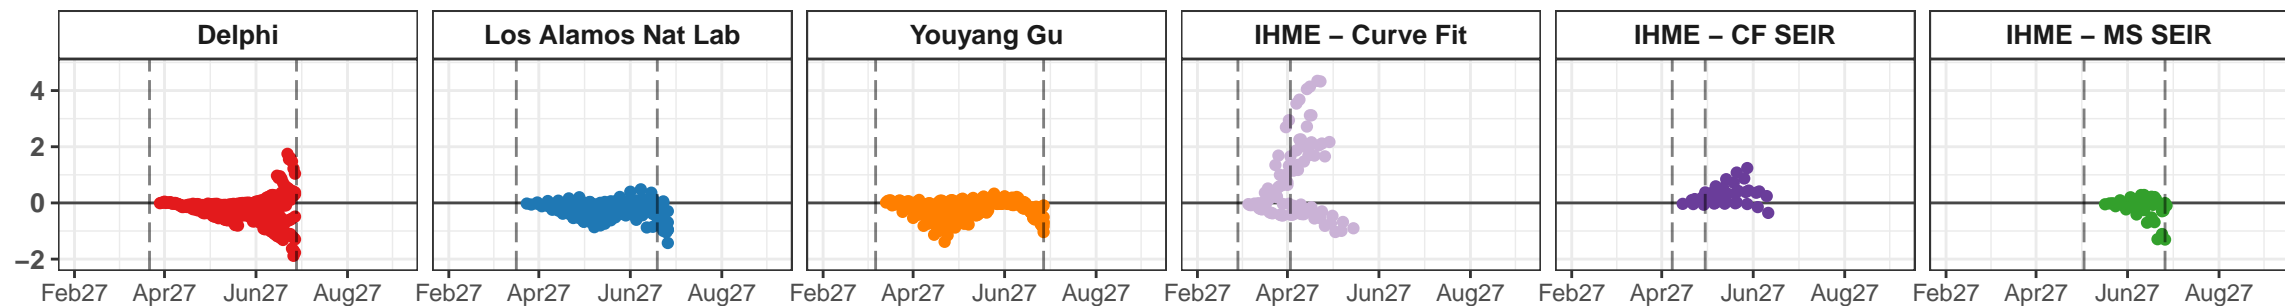



# Texas

## Current Forecast

Delphi Los Alamos Nat Lab Youyang Gu IHME - MS SEIR JHU NYT

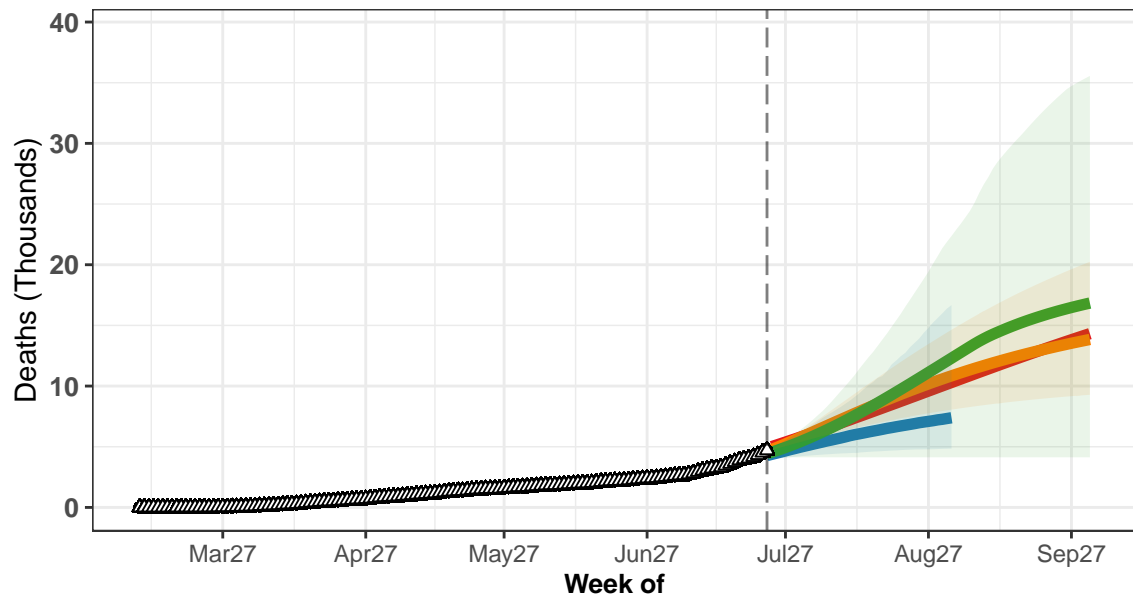

## Cumulative Out-Of-Sample Error (Post Intercept Shift)

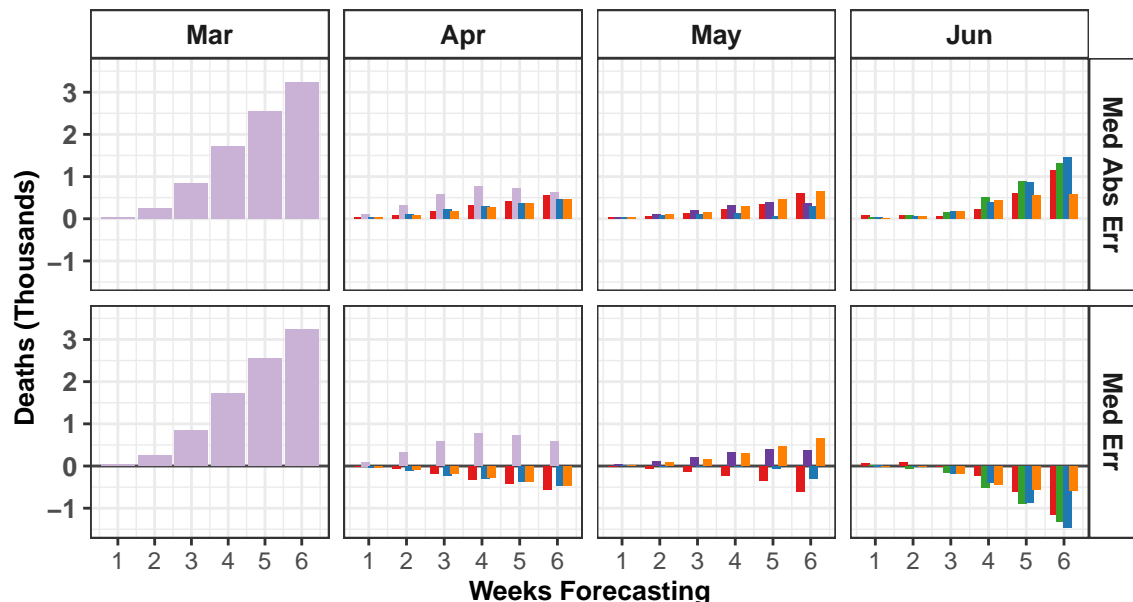

## All Model Versions

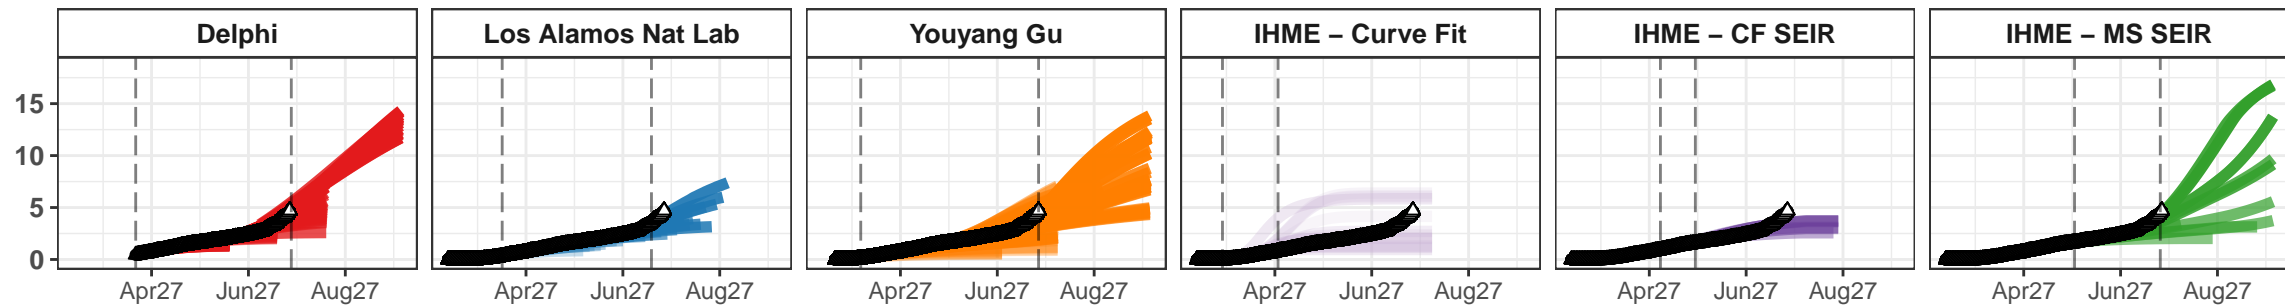

## All Cumulative Errors

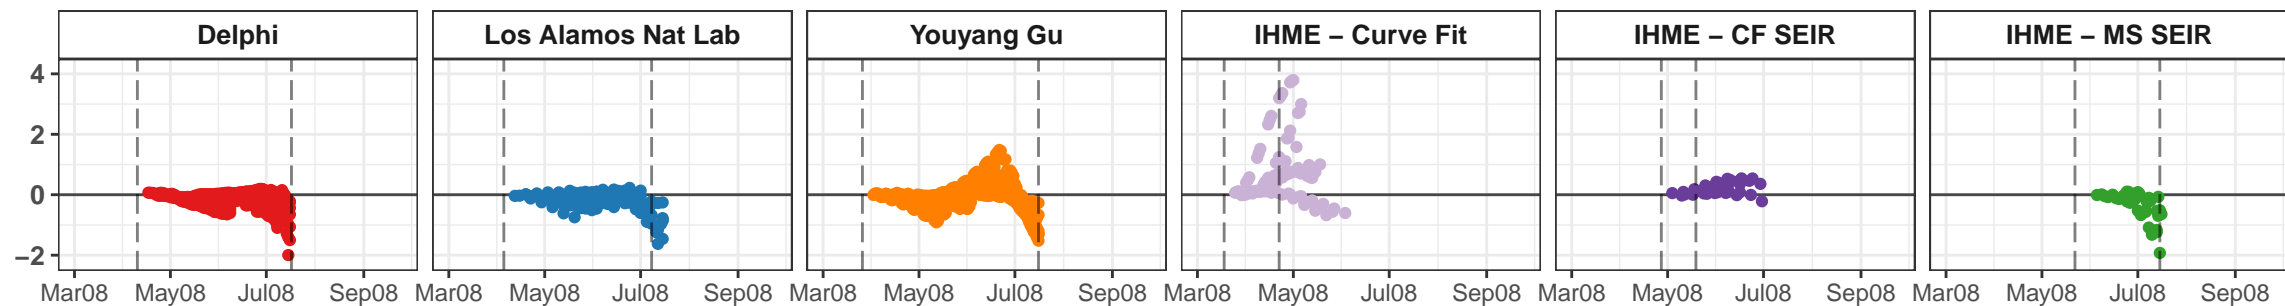

# China

## Current Forecast

Los Alamos Nat Lab Youyang Gu

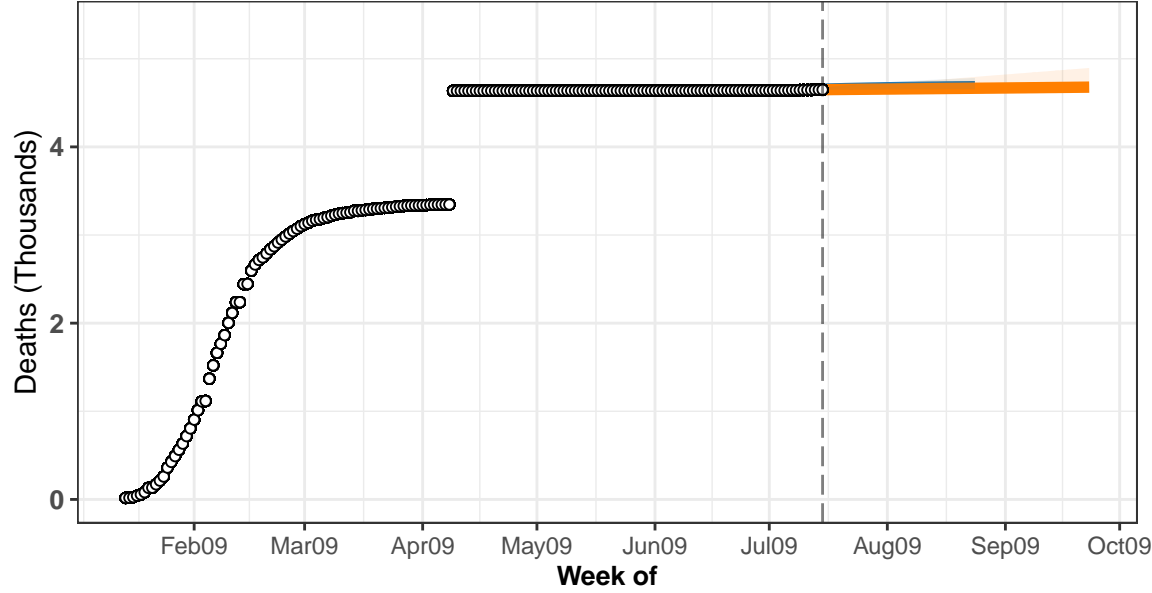

## Cumulative Out-Of-Sample Error (Post Intercept Shift)

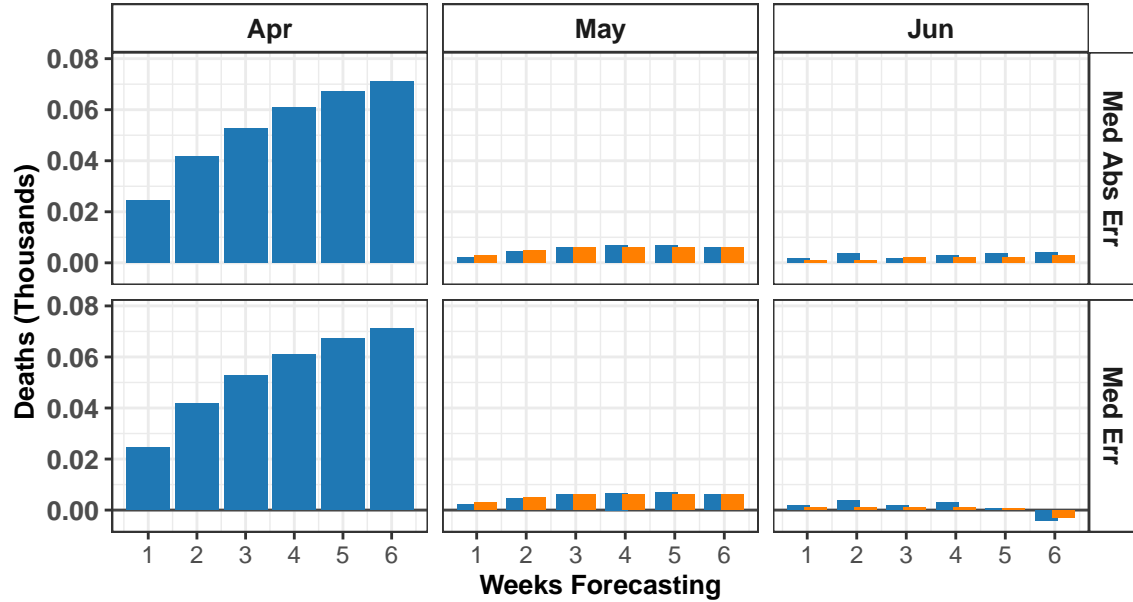

## All Model Versions

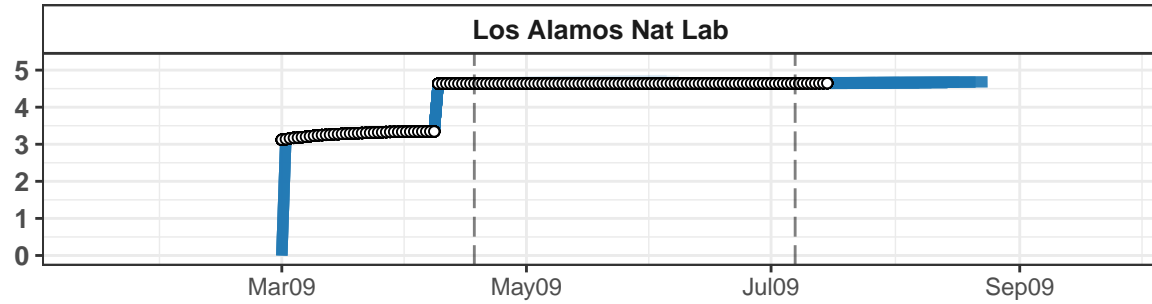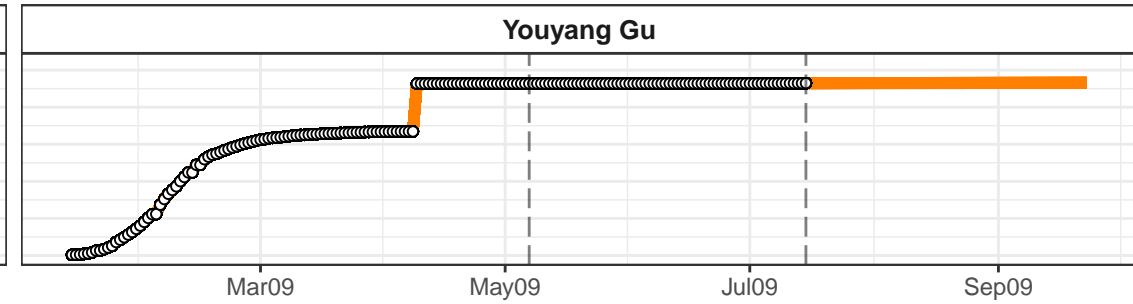

## All Cumulative Errors

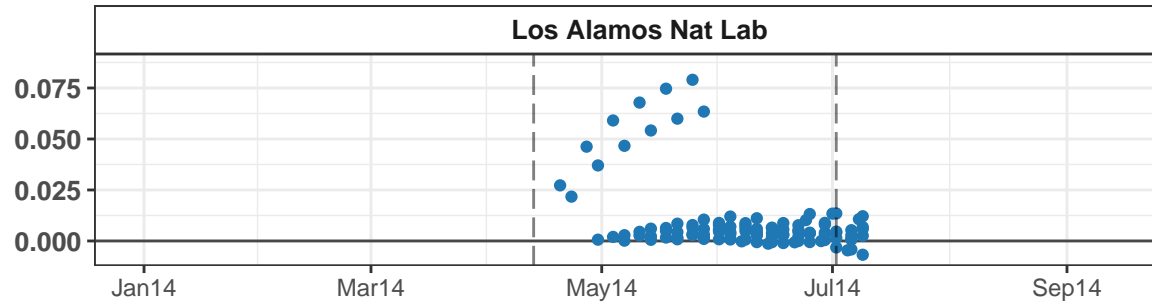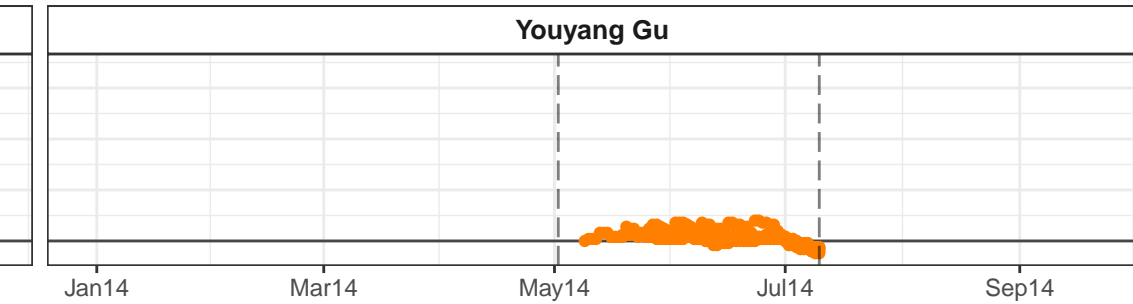

# Indonesia

## Current Forecast

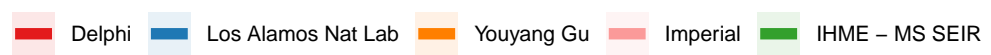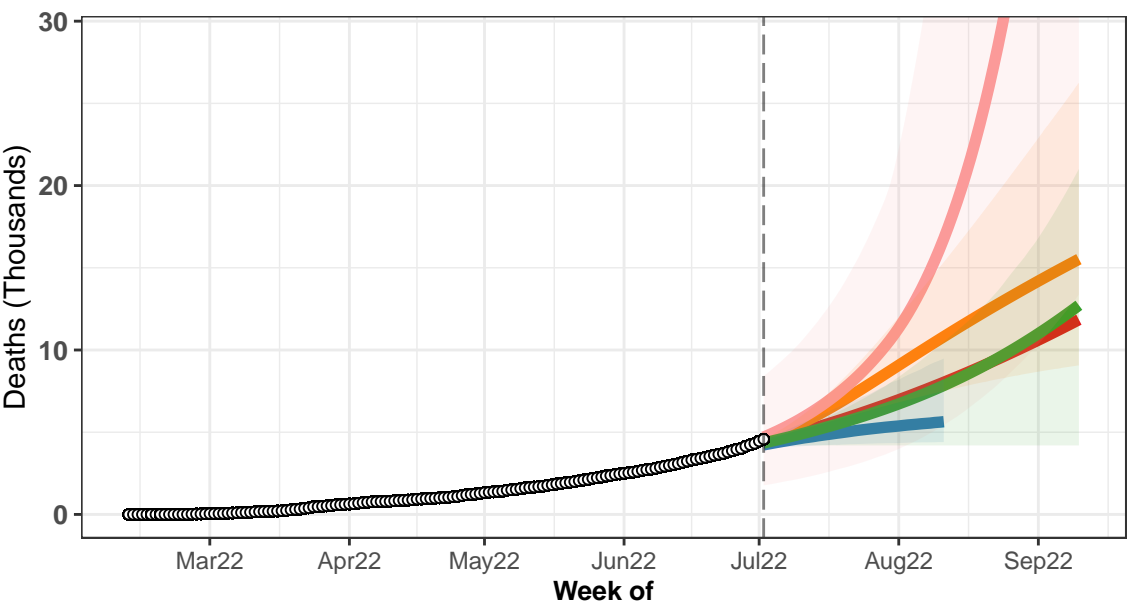

## Cumulative Out-Of-Sample Error (Post Intercept Shift)

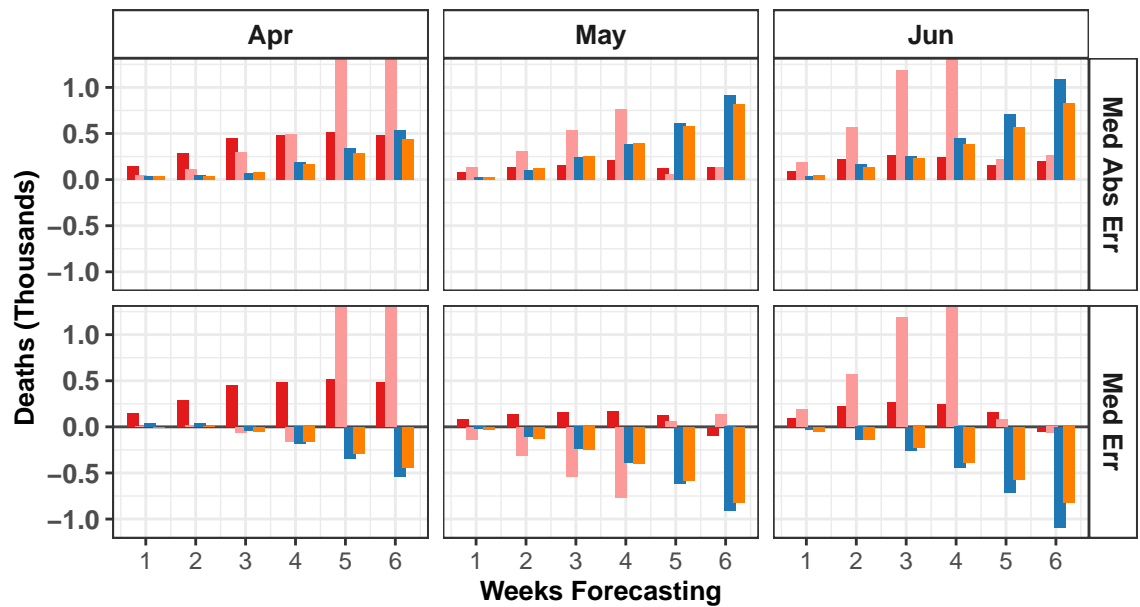

## All Model Versions

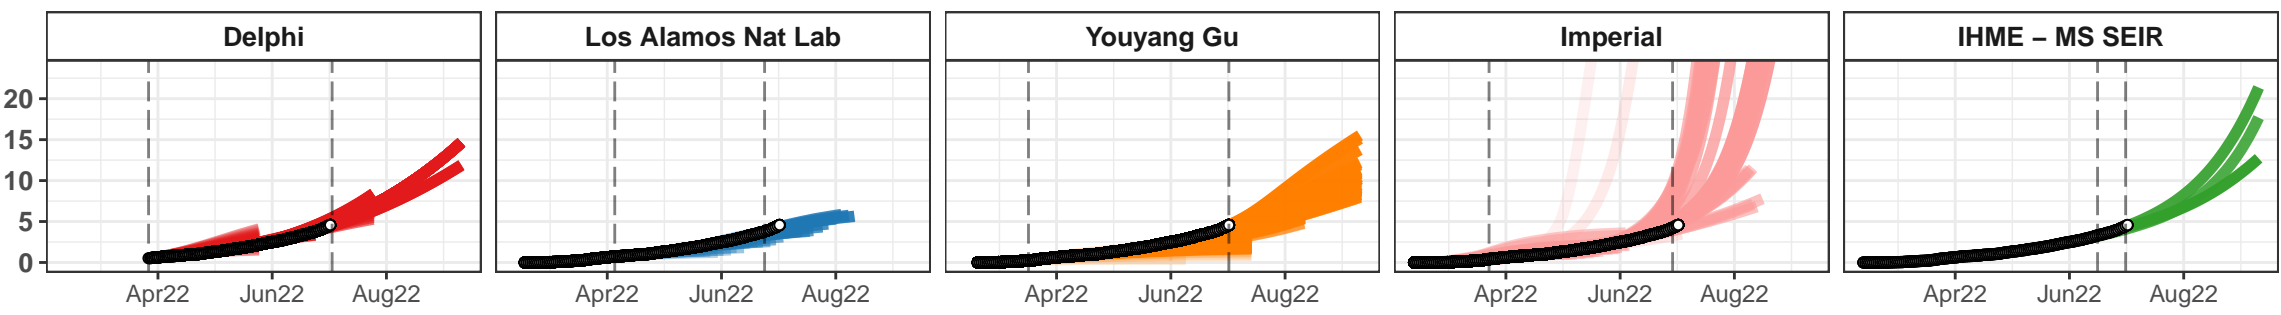

## All Cumulative Errors

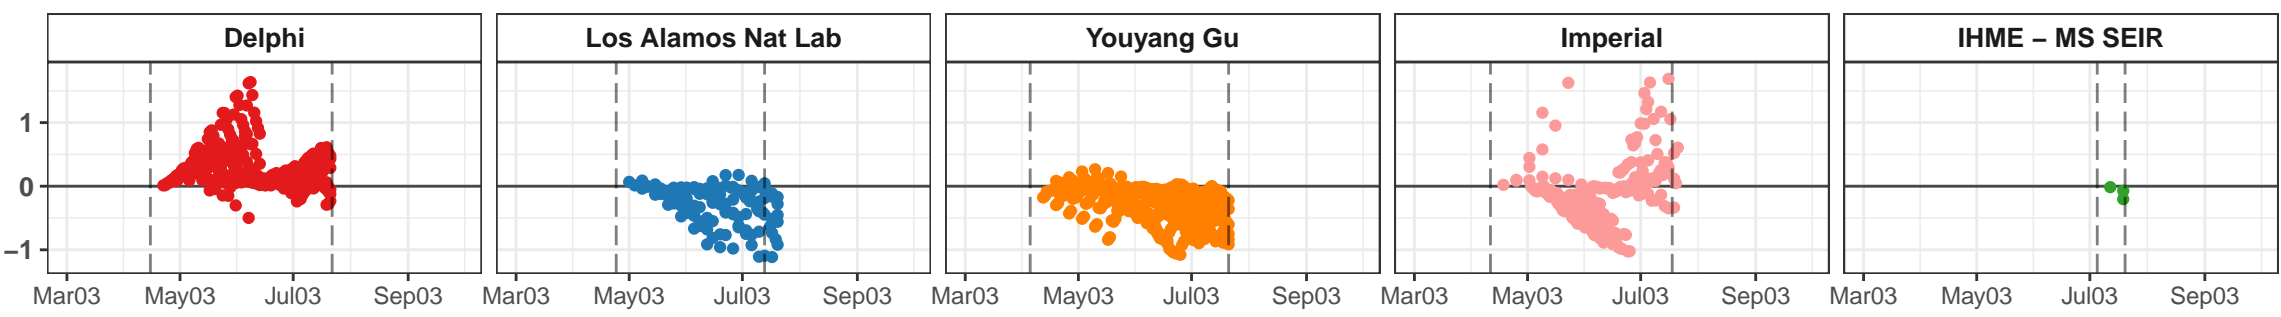

# Egypt

## Current Forecast

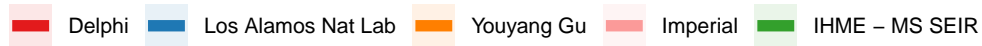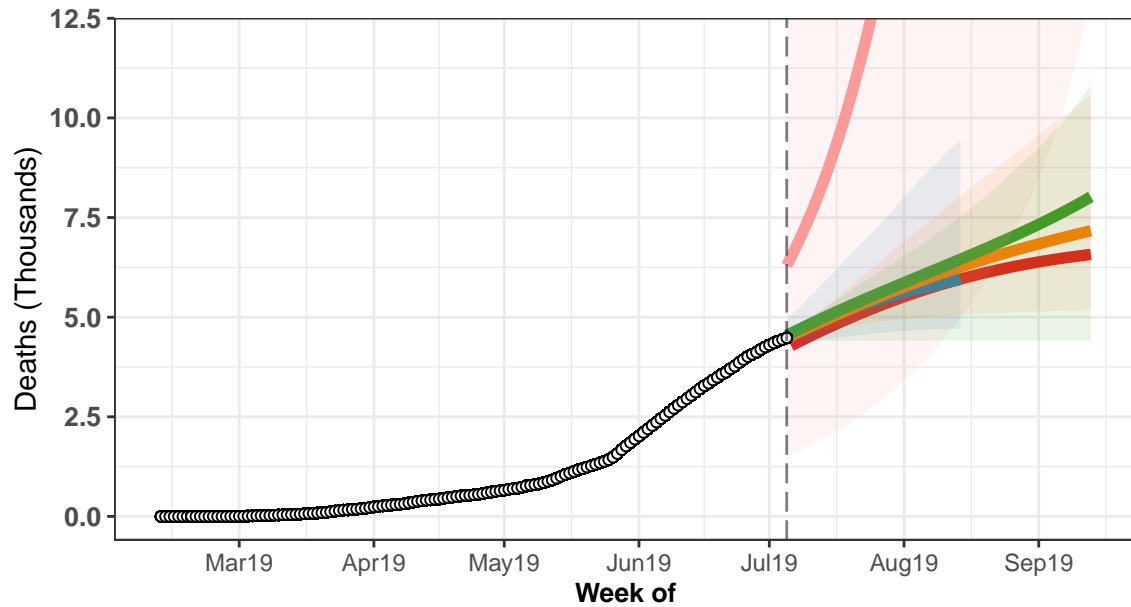

## Cumulative Out-Of-Sample Error (Post Intercept Shift)

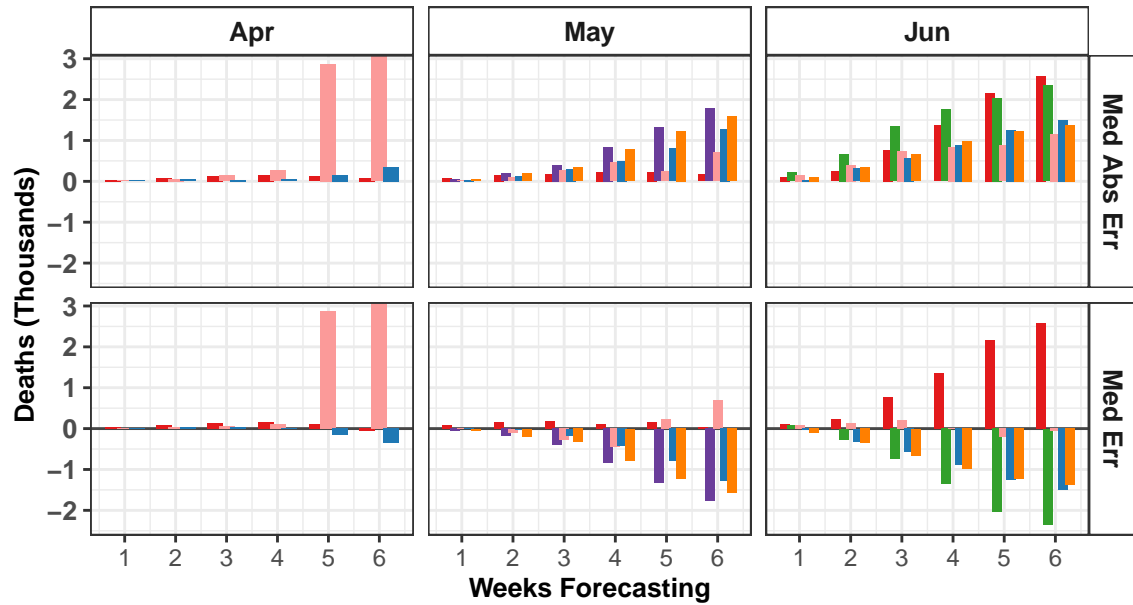

## All Model Versions

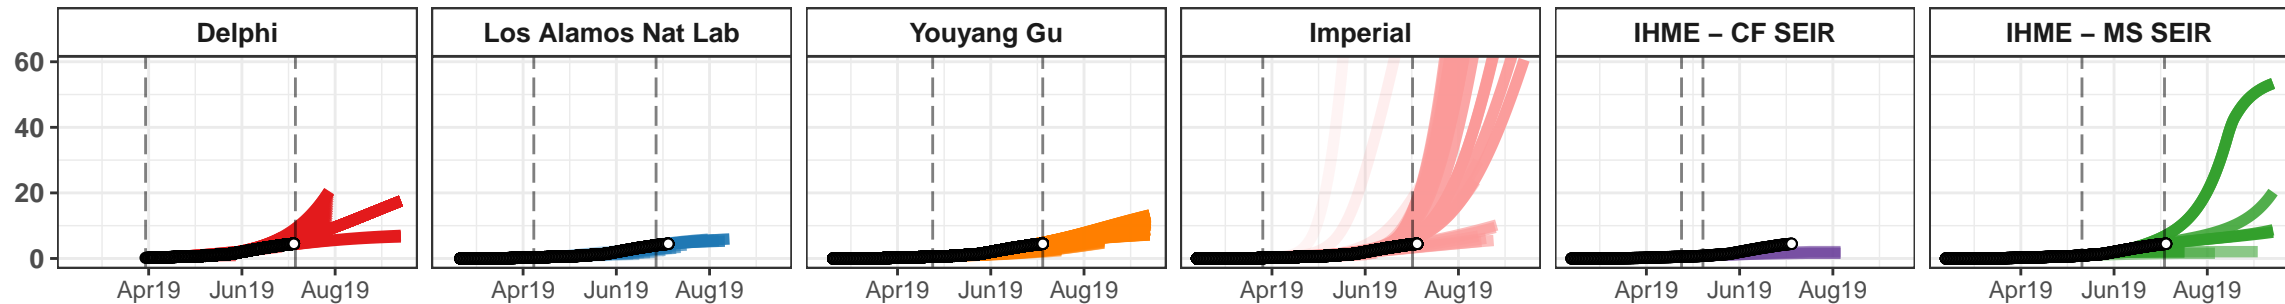

## All Cumulative Errors

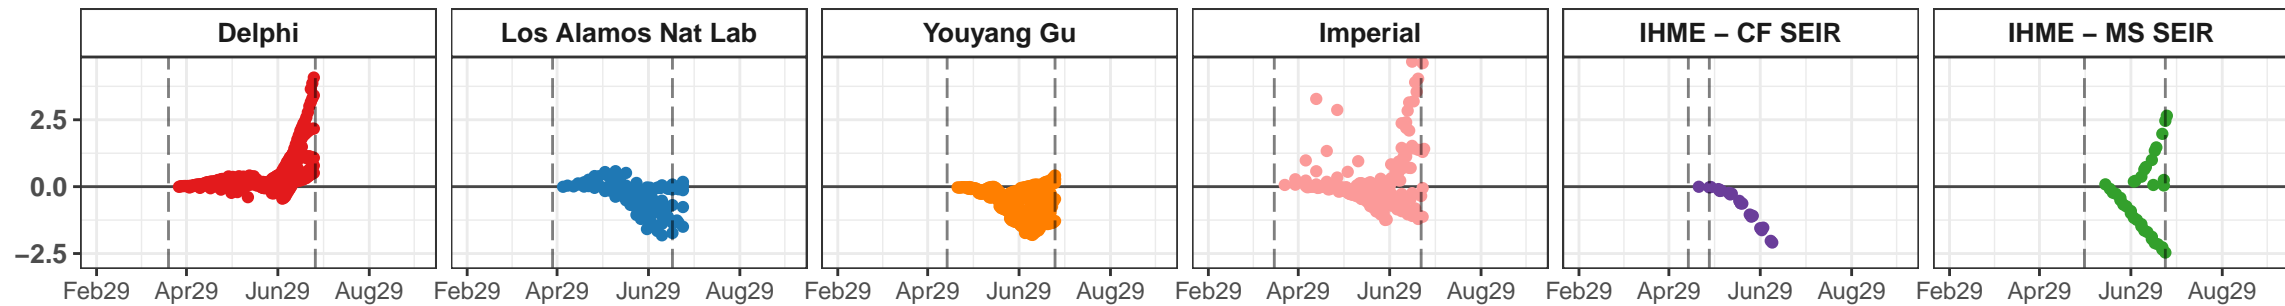

# Connecticut

## Current Forecast

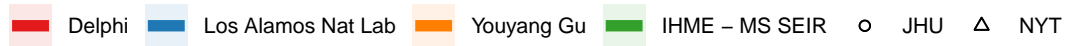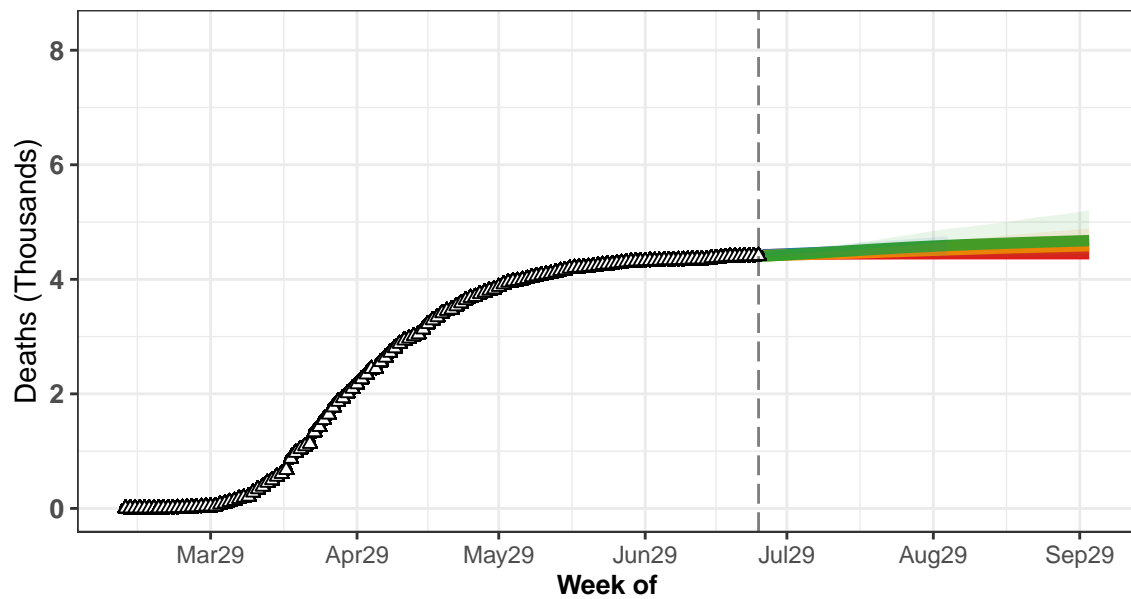

## Cumulative Out-Of-Sample Error (Post Intercept Shift)

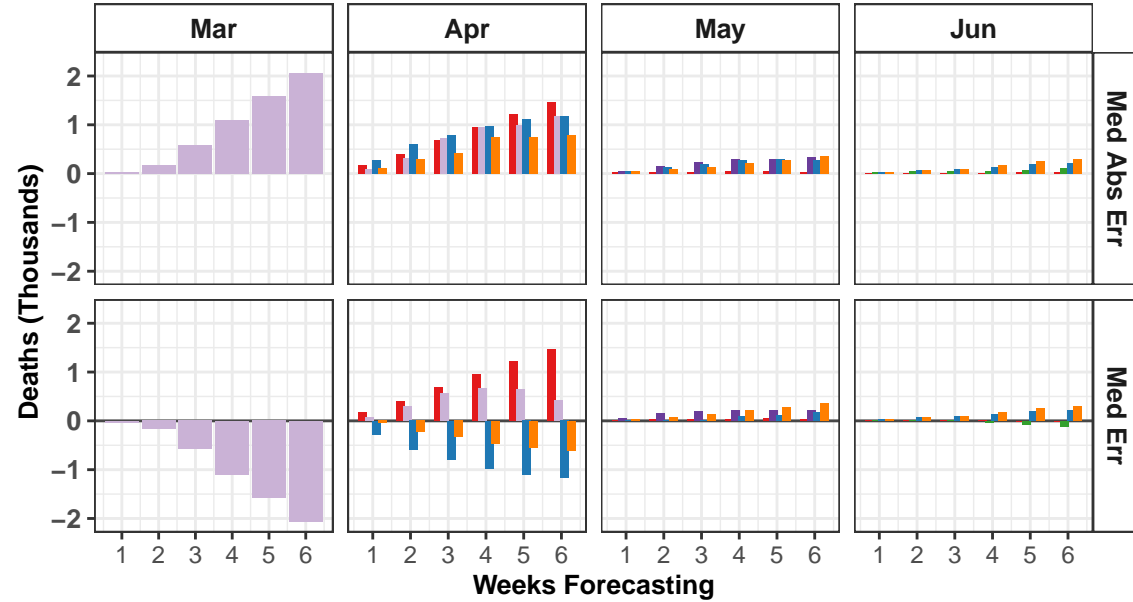

## All Model Versions

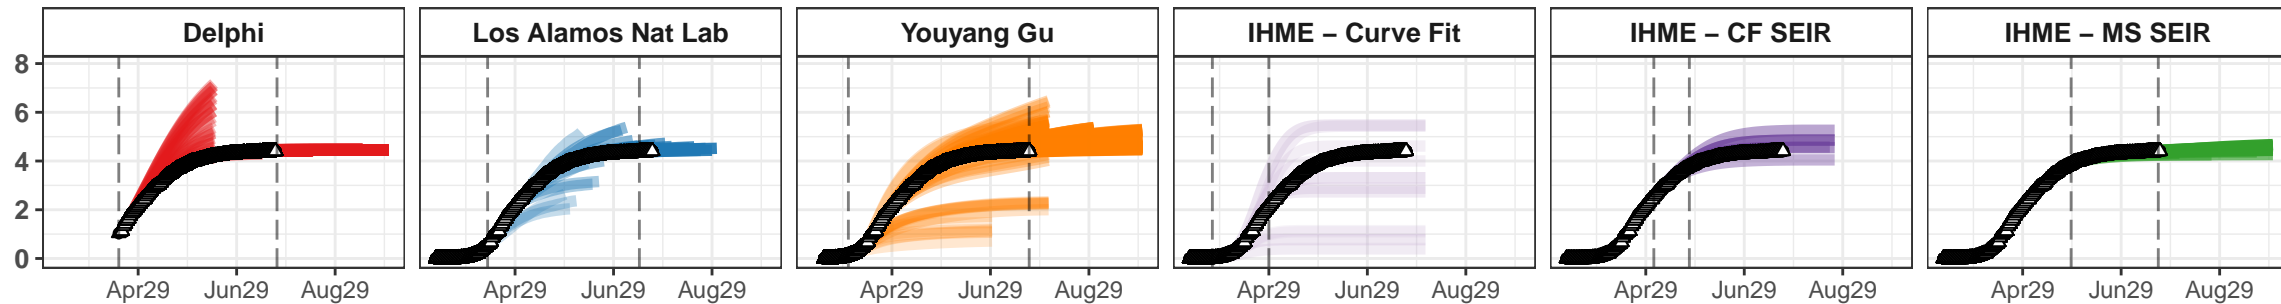

## All Cumulative Errors

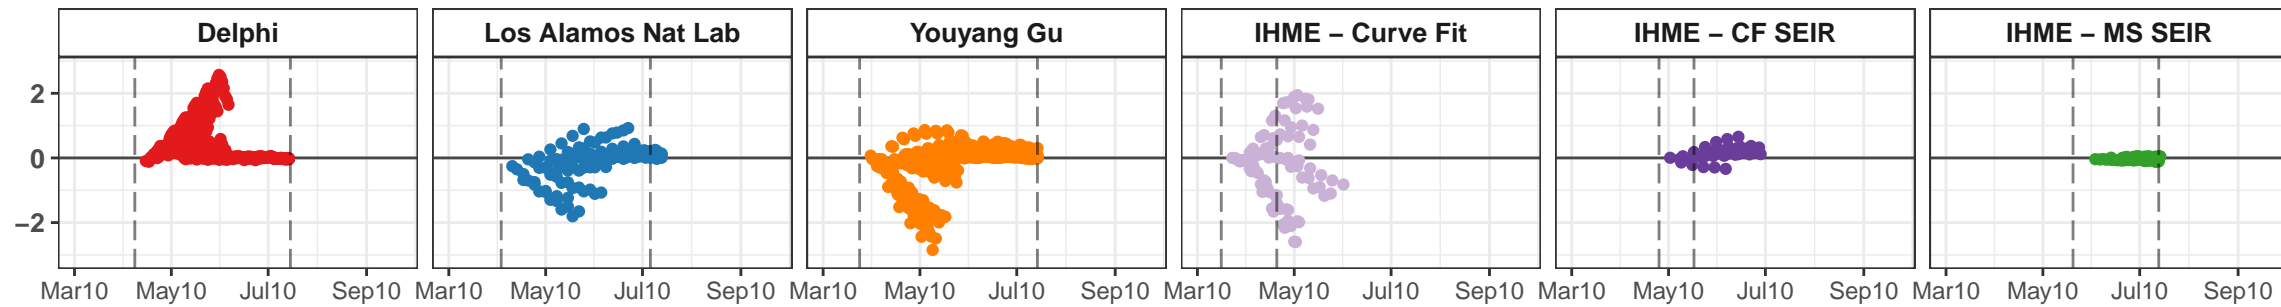

# Iraq

## Current Forecast

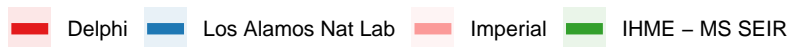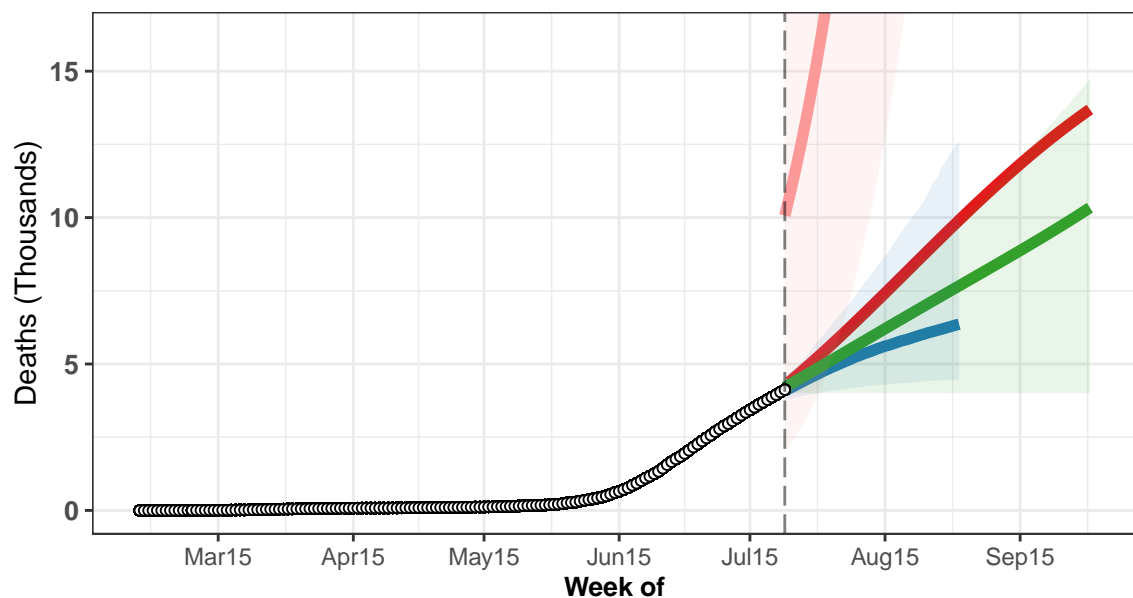

## Cumulative Out-Of-Sample Error (Post Intercept Shift)

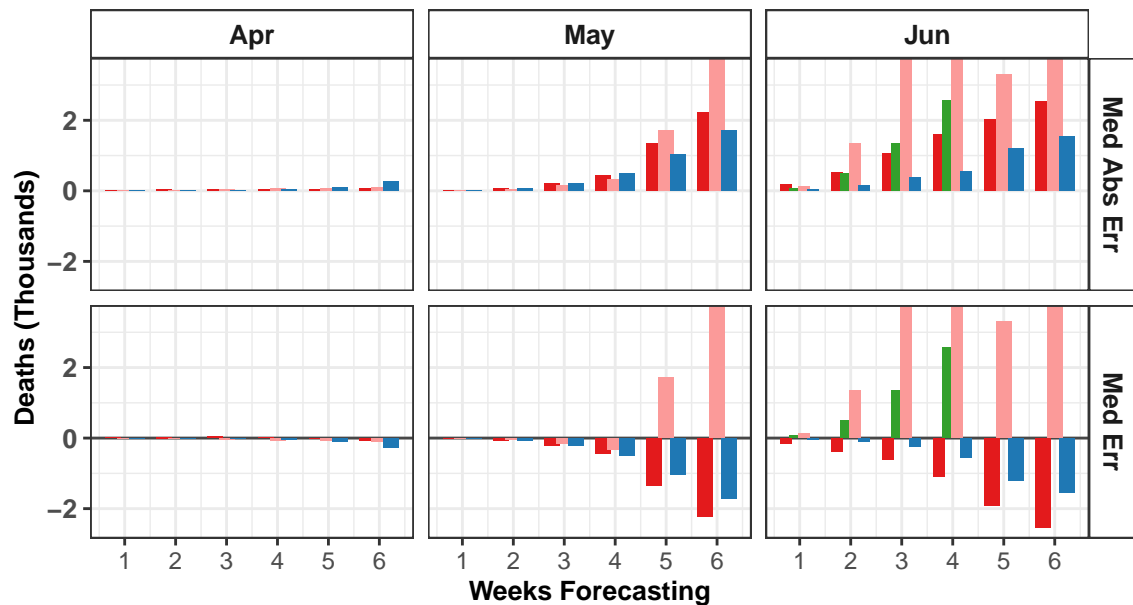

## All Model Versions

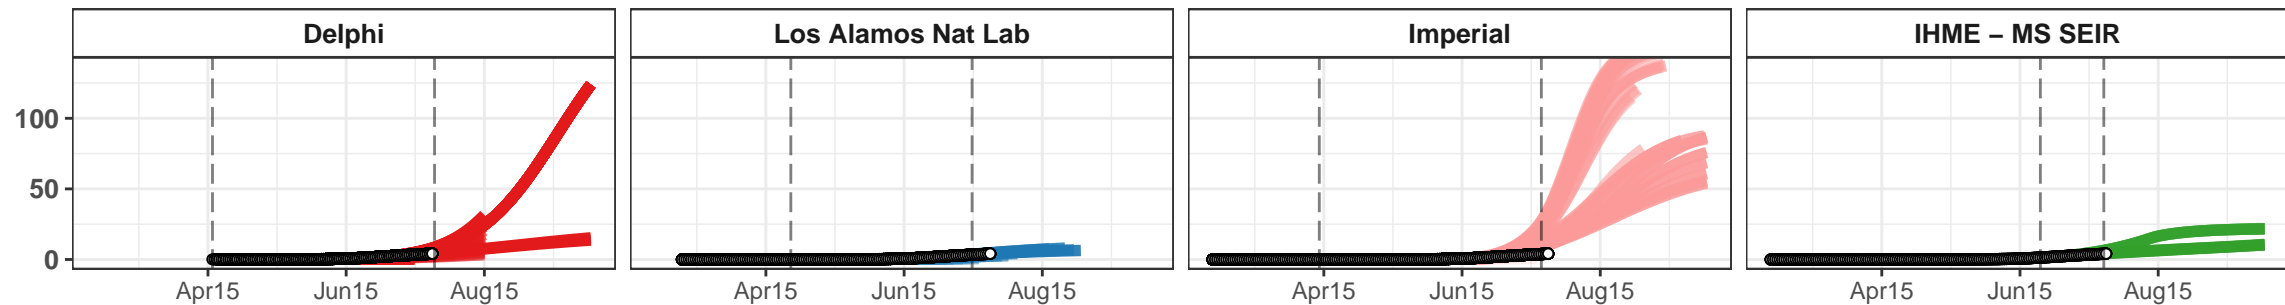

## All Cumulative Errors

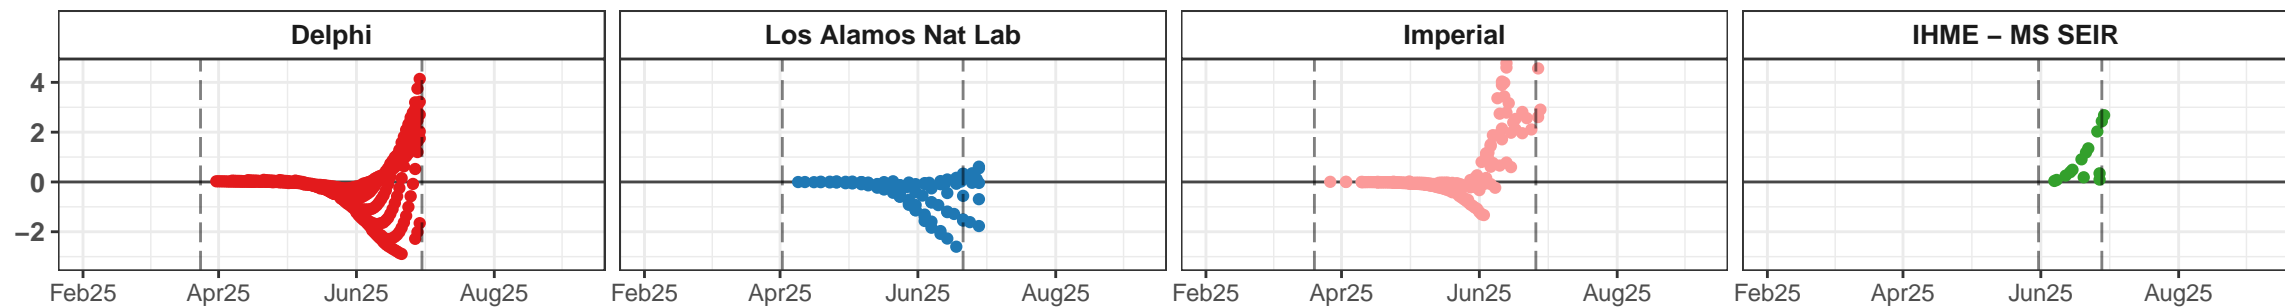

# Louisiana

## Current Forecast

Delphi Los Alamos Nat Lab Youyang Gu IHME – MS SEIR ○ JHU △ NYT

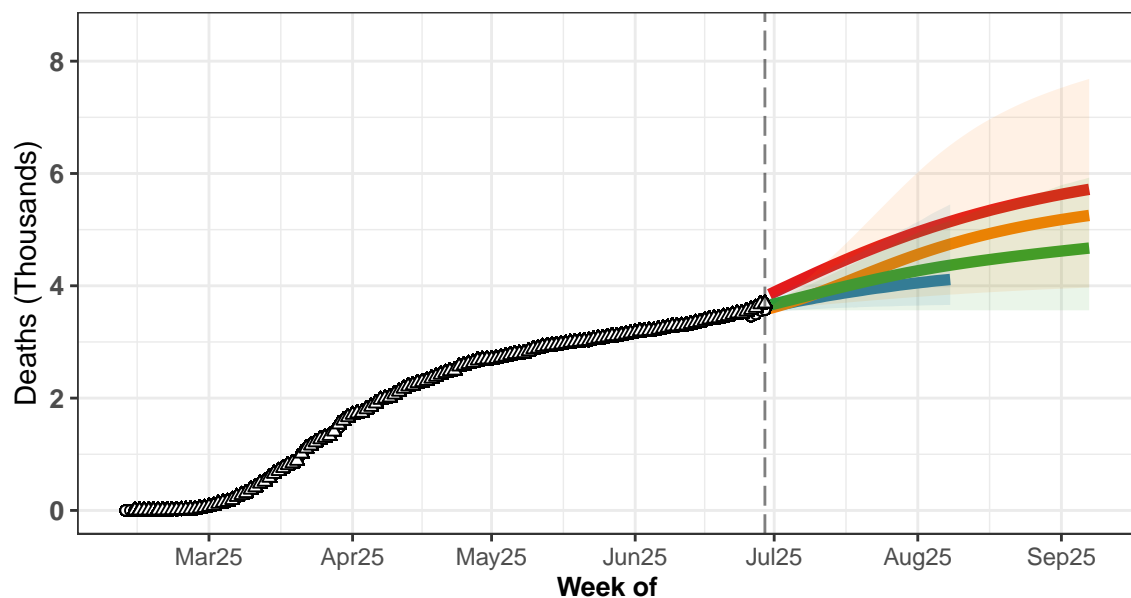

## Cumulative Out-Of-Sample Error (Post Intercept Shift)

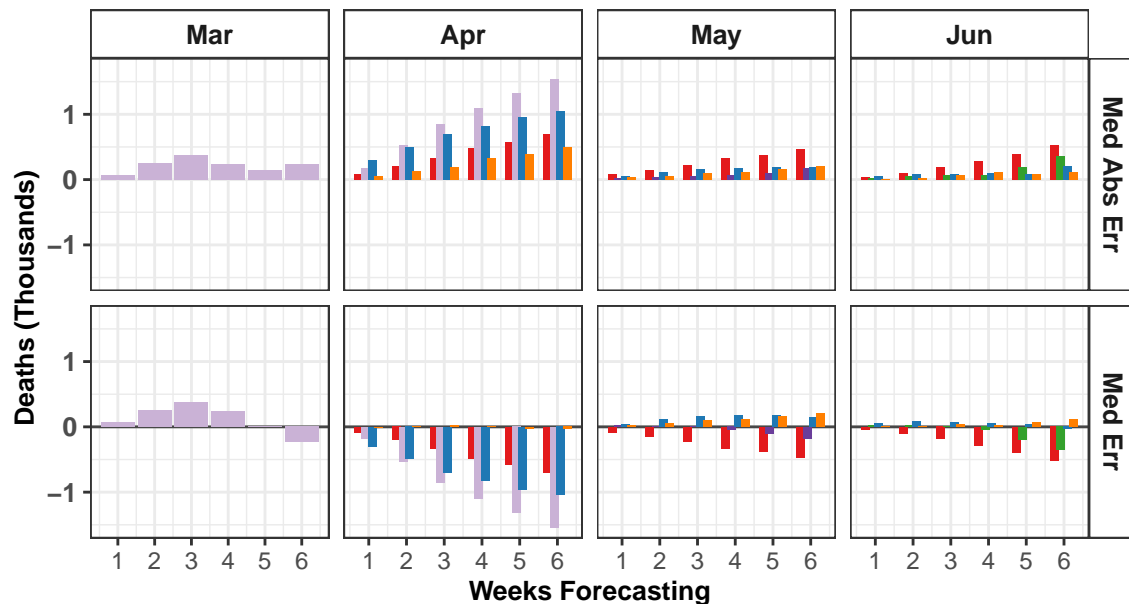

## All Model Versions

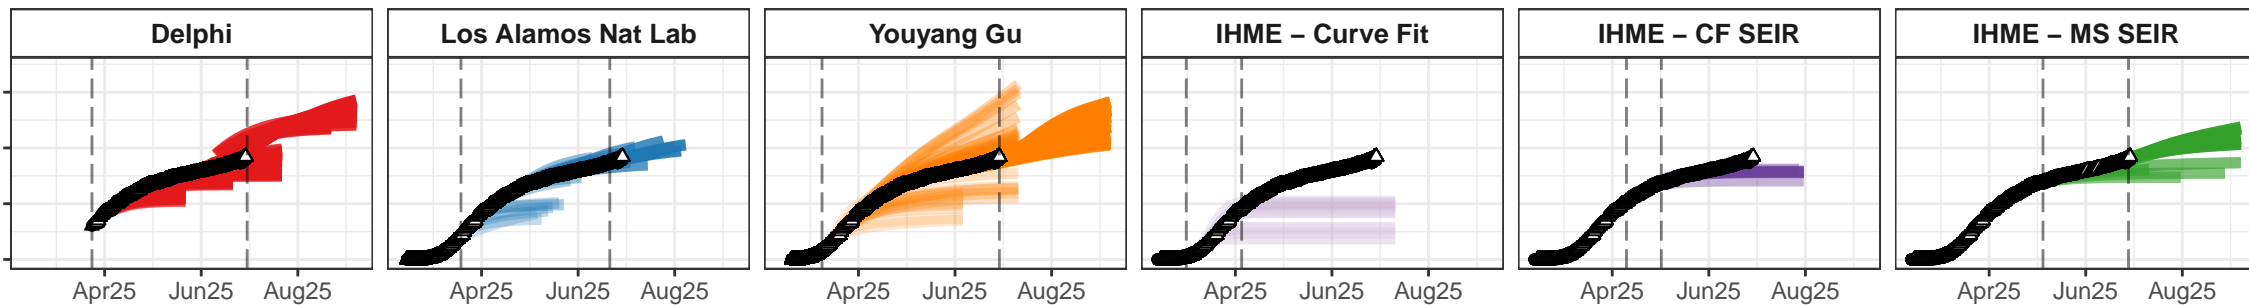

## All Cumulative Errors

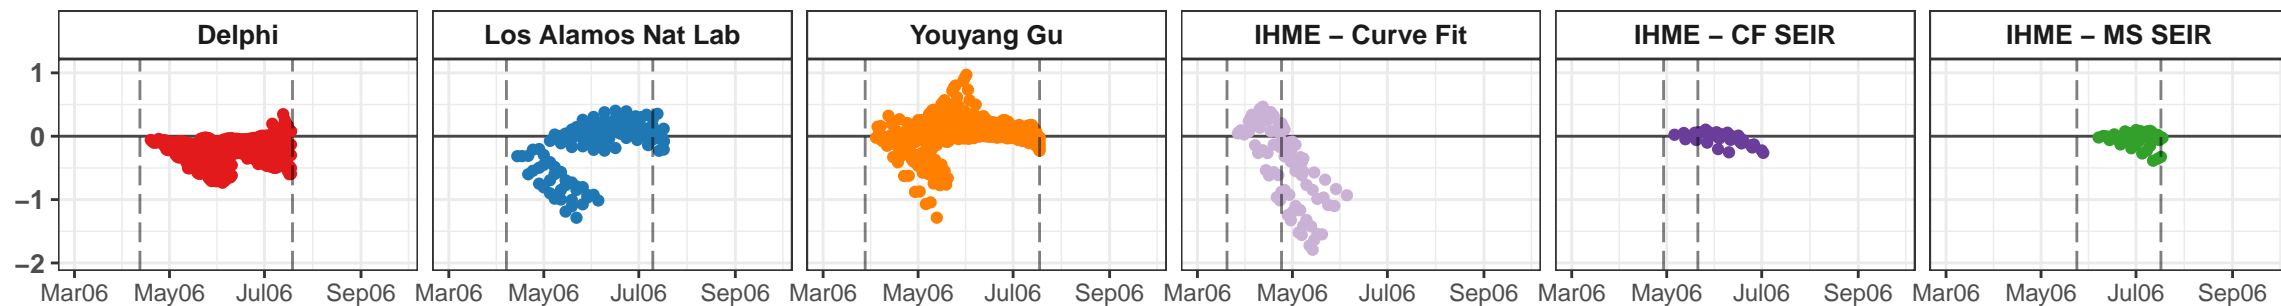

# Maryland

## Current Forecast

Delphi Los Alamos Nat Lab Youyang Gu IHME - MS SEIR ○ JHU △ NYT

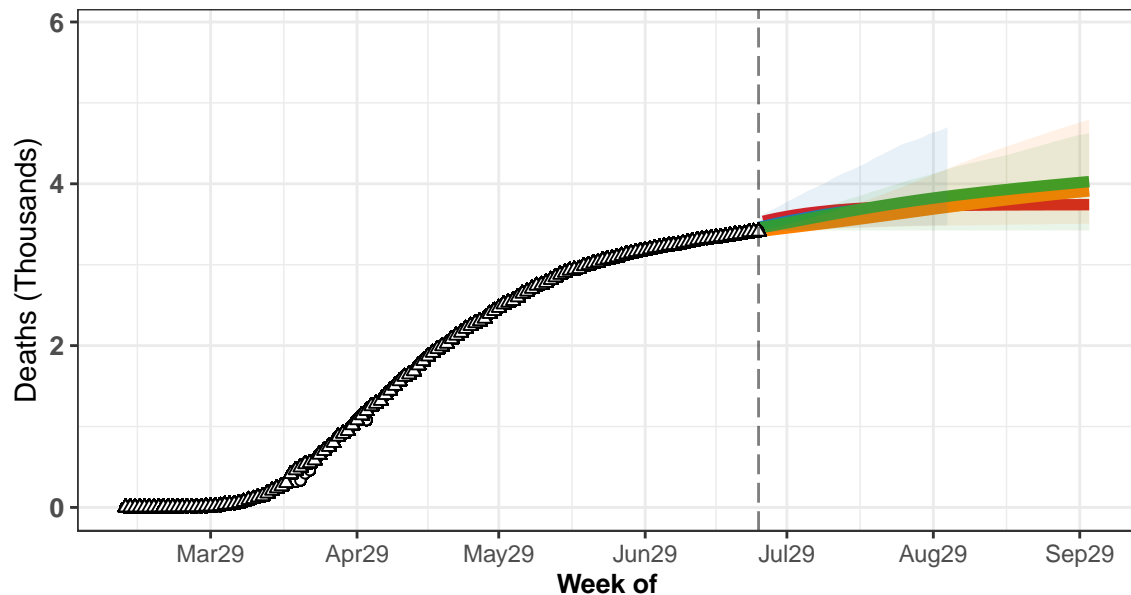

## Cumulative Out-Of-Sample Error (Post Intercept Shift)

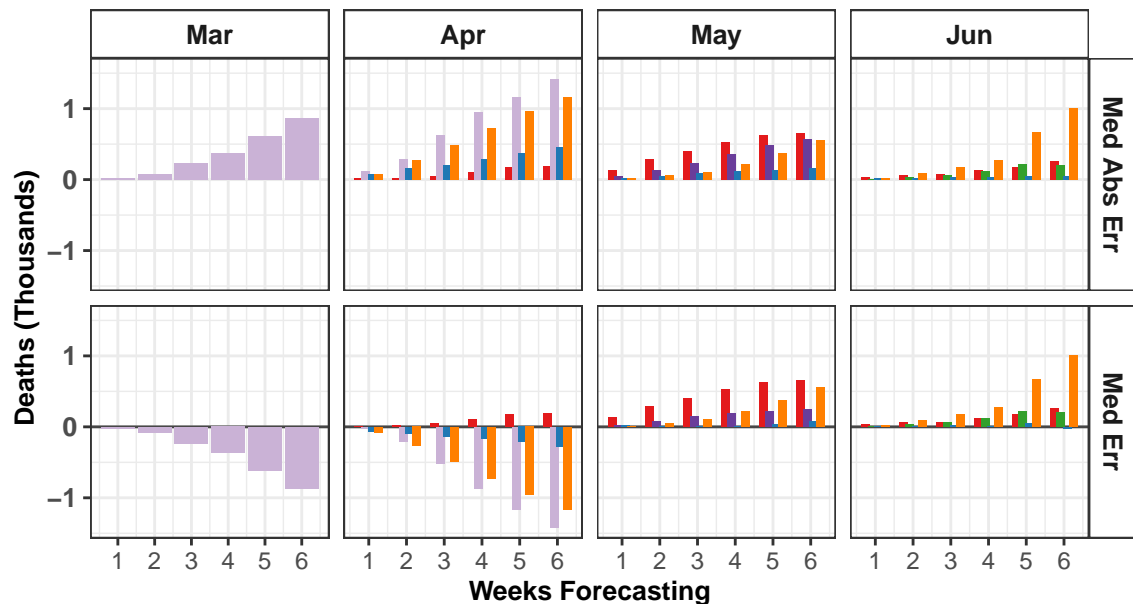

## All Model Versions

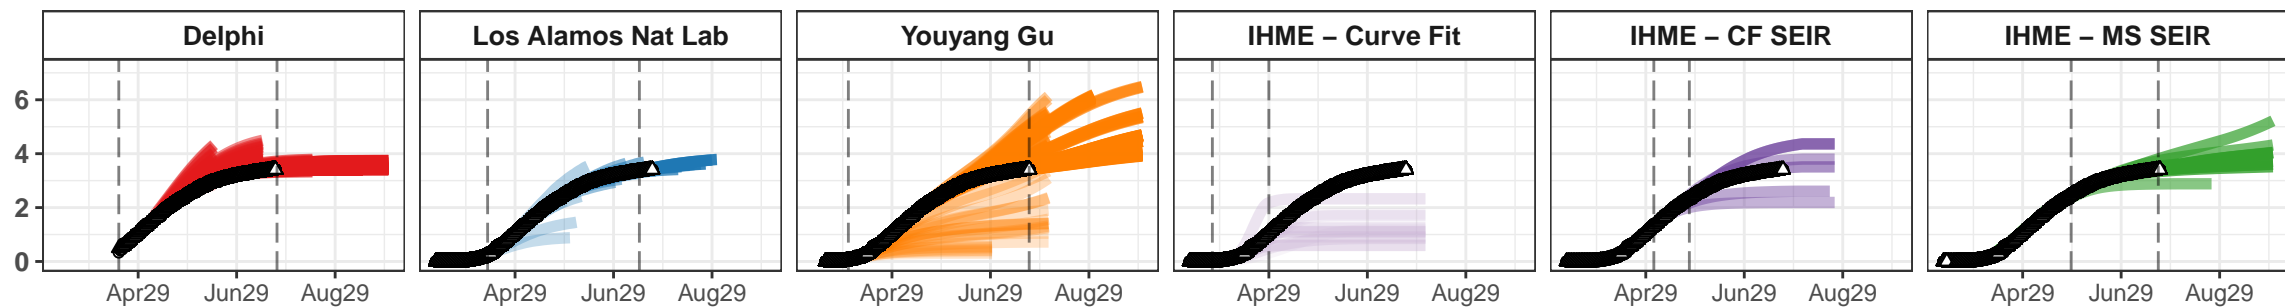

## All Cumulative Errors

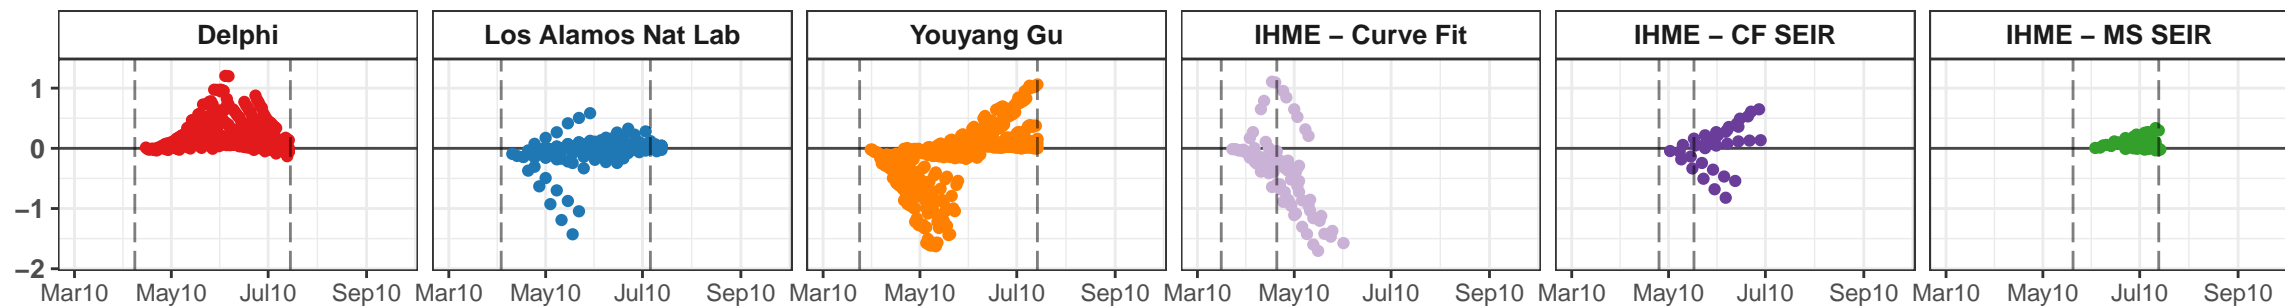



# Georgia

## Current Forecast

Delphi Los Alamos Nat Lab Youyang Gu IHME - MS SEIR JHU NYT

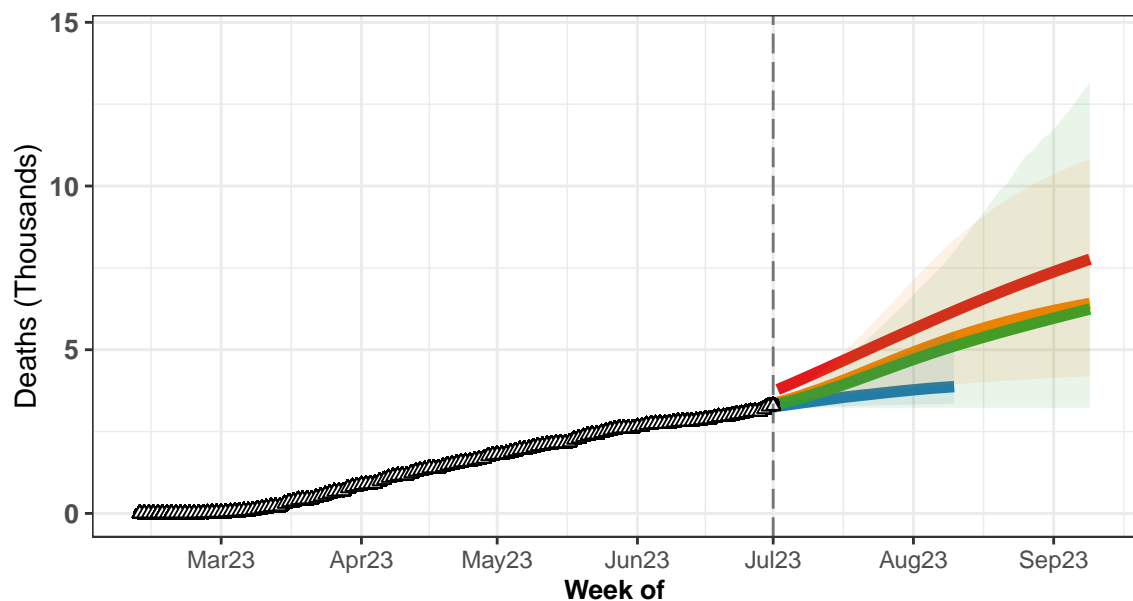

## Cumulative Out-Of-Sample Error (Post Intercept Shift)

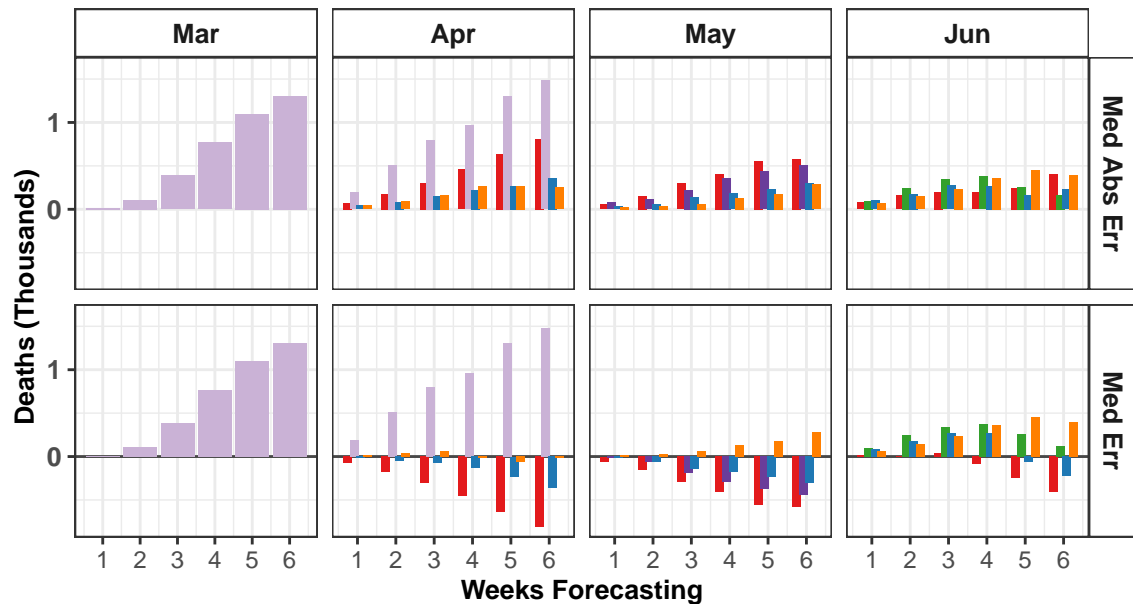

## All Model Versions

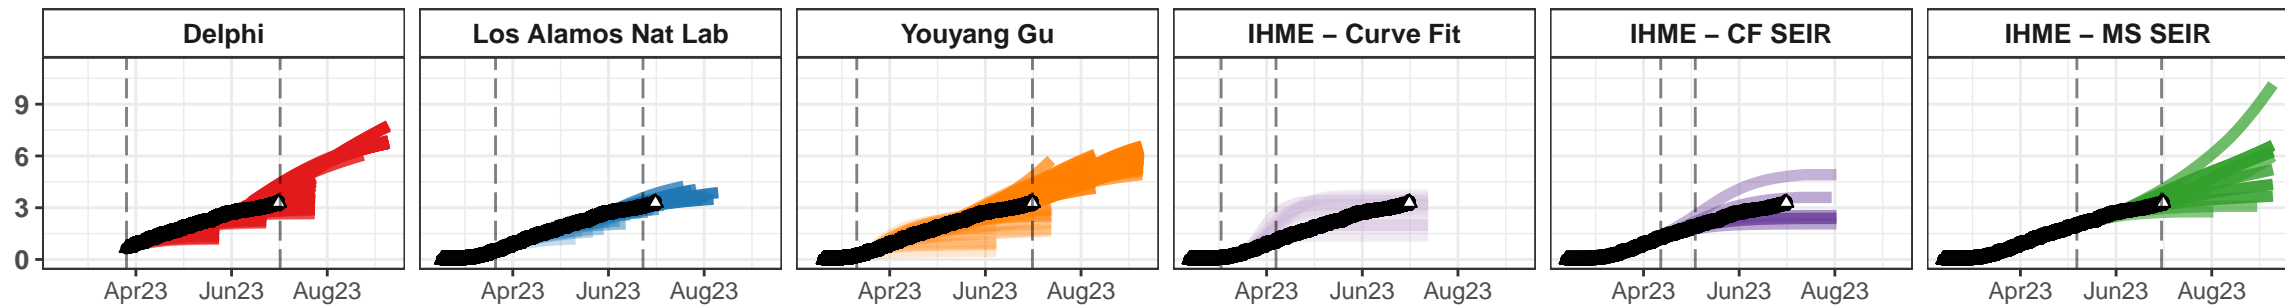

## All Cumulative Errors

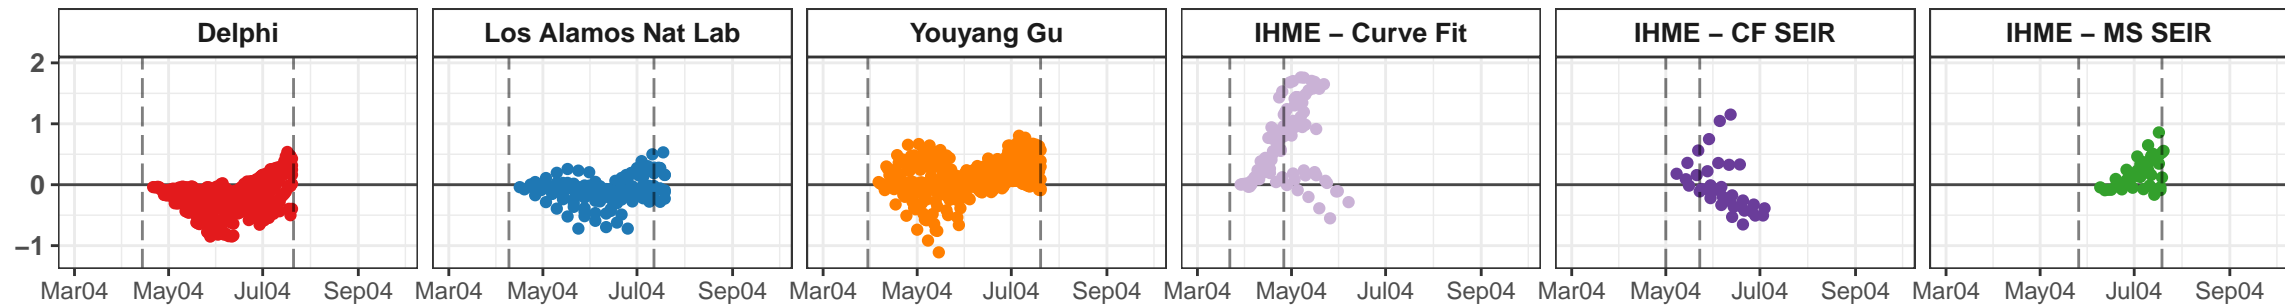

# Ohio

## Current Forecast

Delphi Los Alamos Nat Lab Youyang Gu IHME – MS SEIR ○ JHU △ NYT

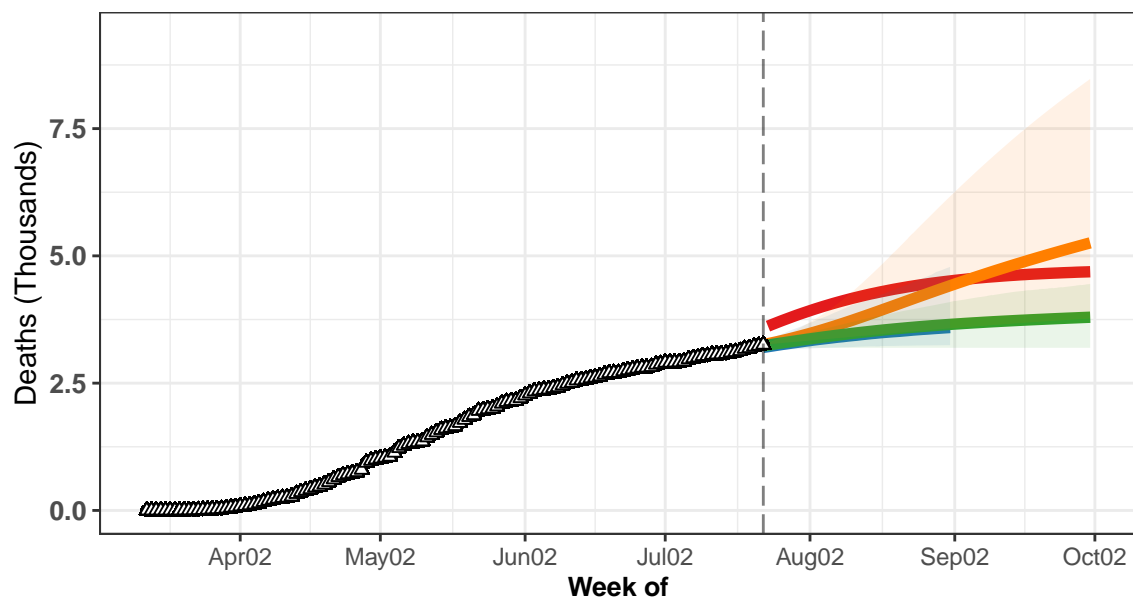

## Cumulative Out-Of-Sample Error (Post Intercept Shift)

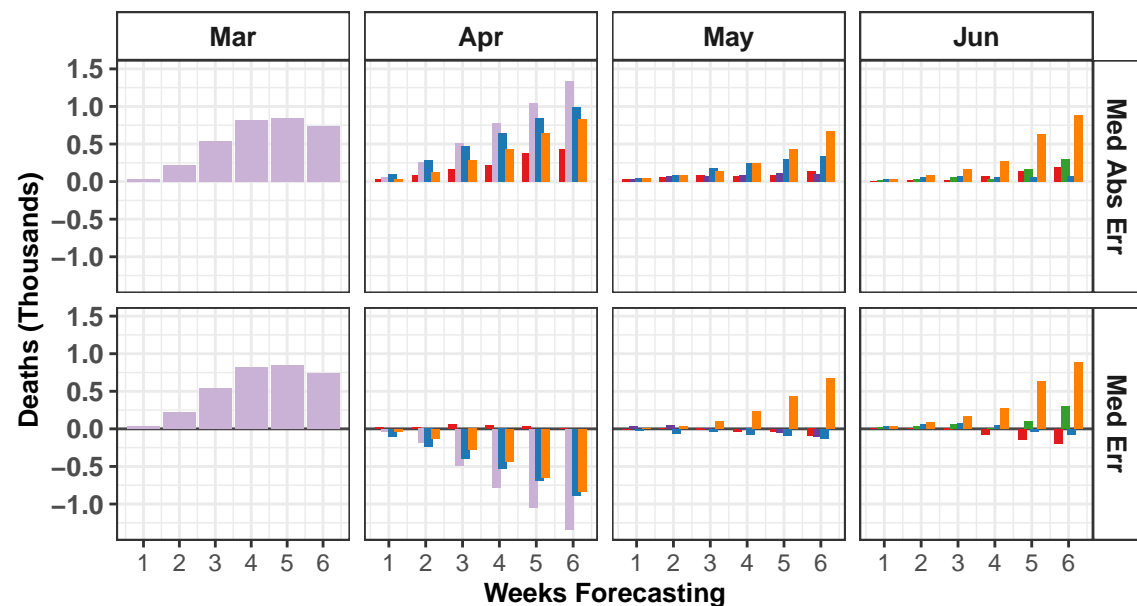

## All Model Versions

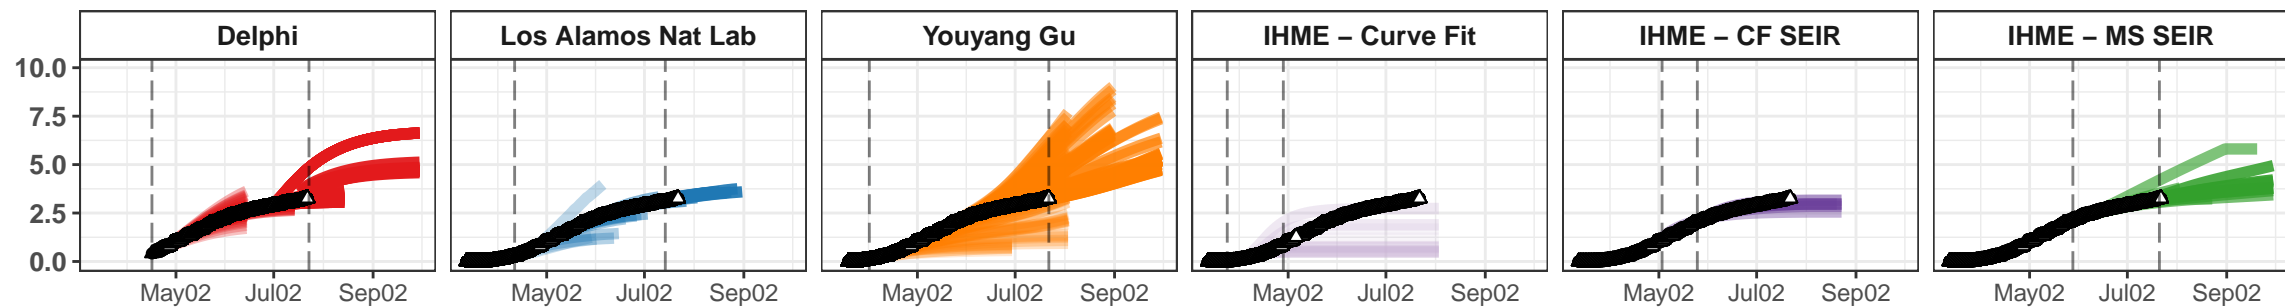

## All Cumulative Errors

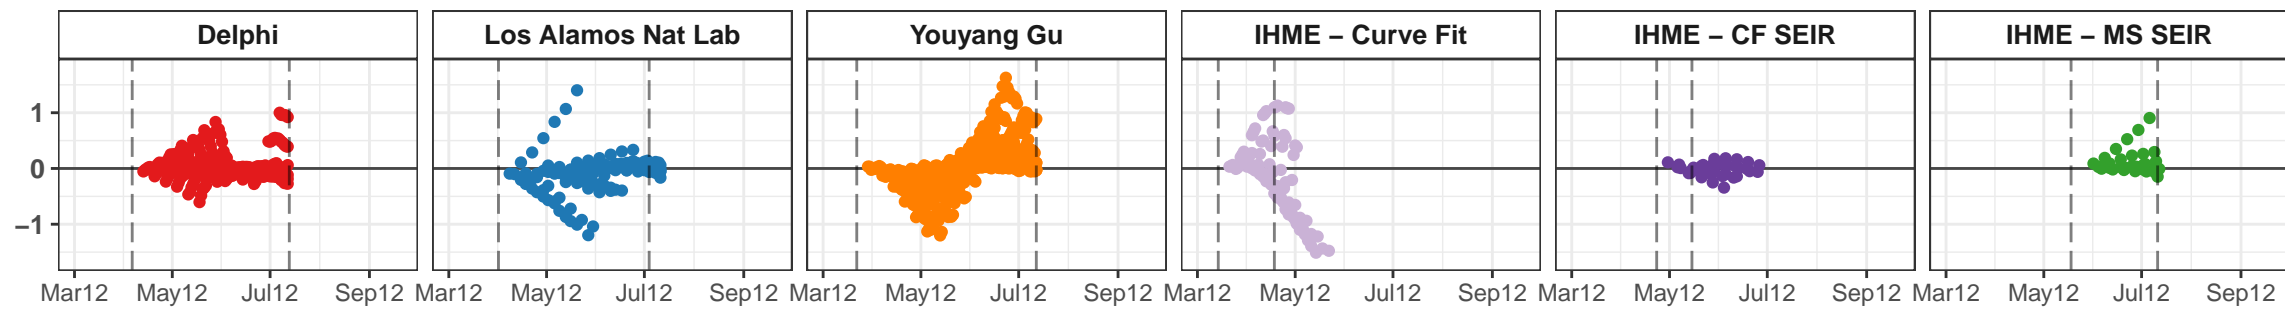

# Arizona

## Current Forecast

Delphi Los Alamos Nat Lab Youyang Gu IHME - MS SEIR ○ JHU △ NYT

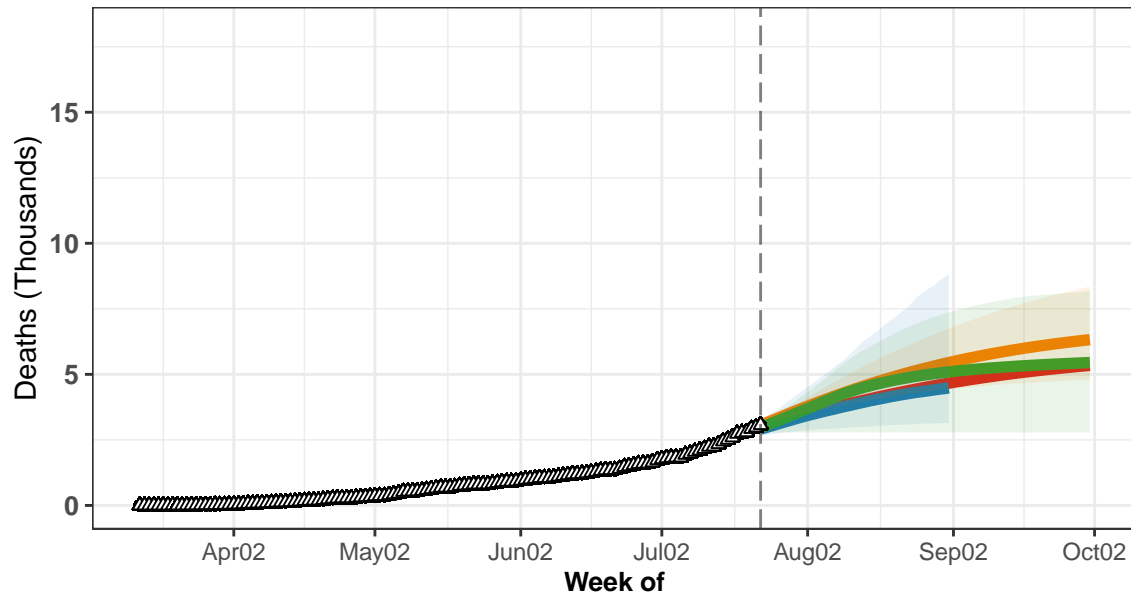

## Cumulative Out-Of-Sample Error (Post Intercept Shift)

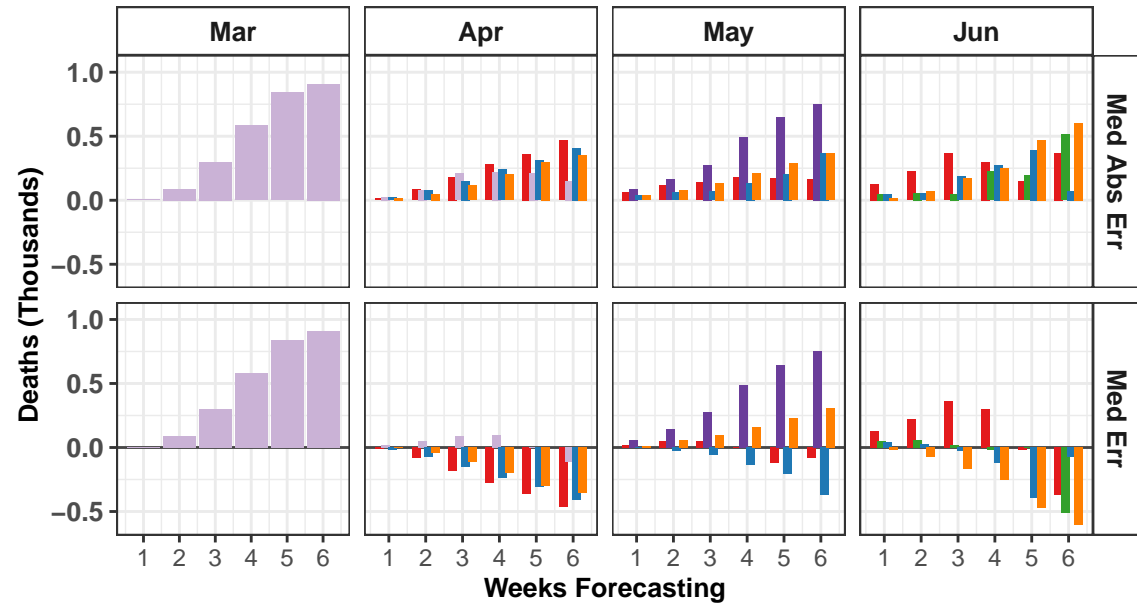

## All Model Versions

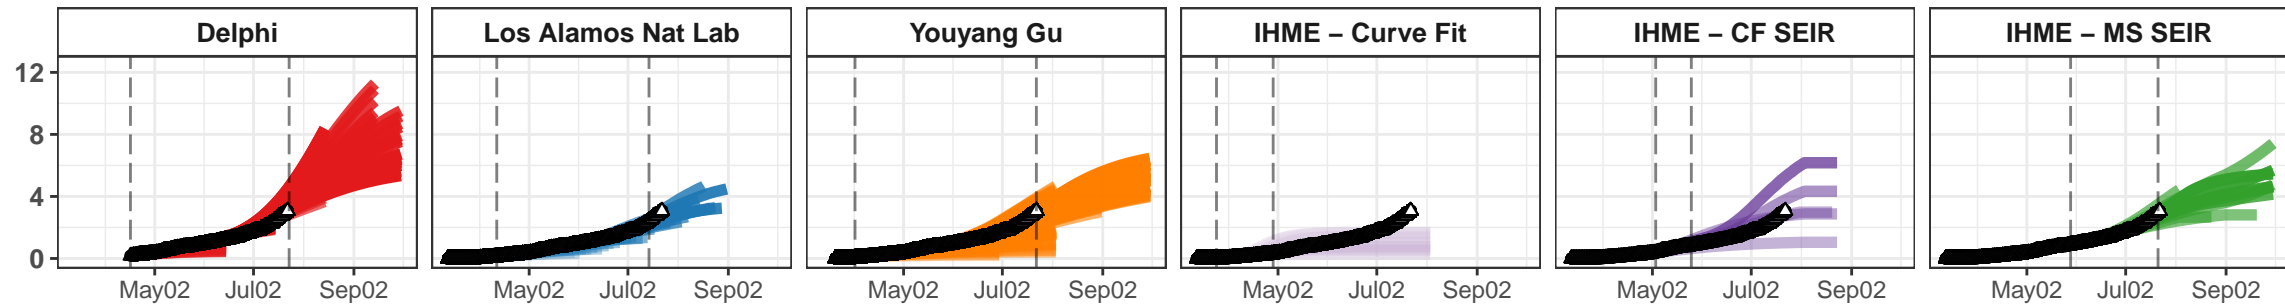

## All Cumulative Errors

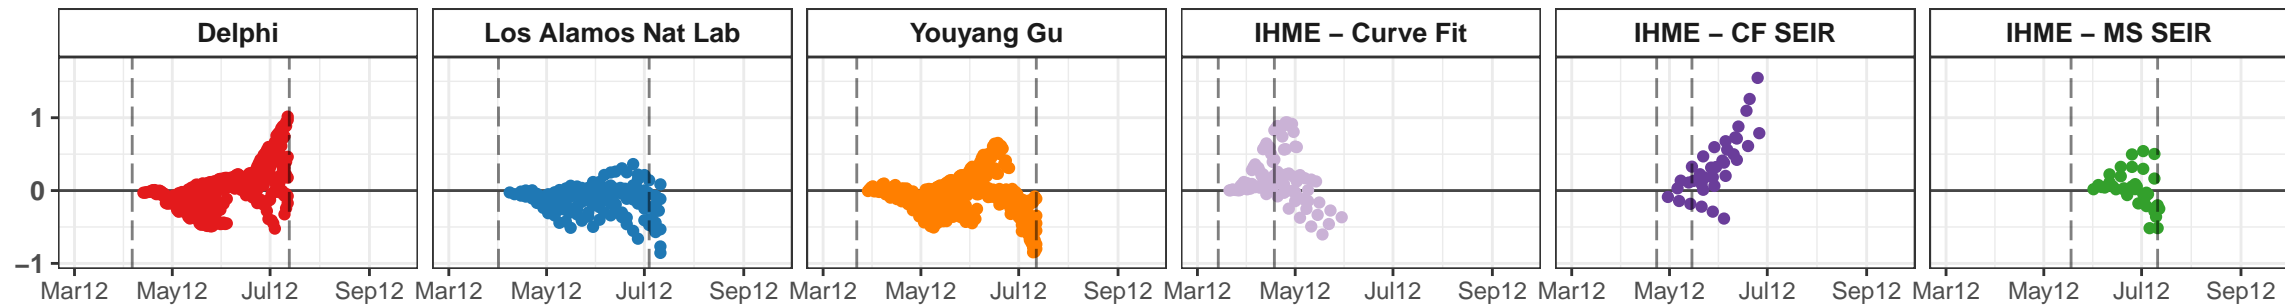

# Indiana

## Current Forecast

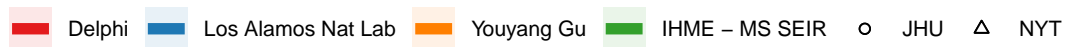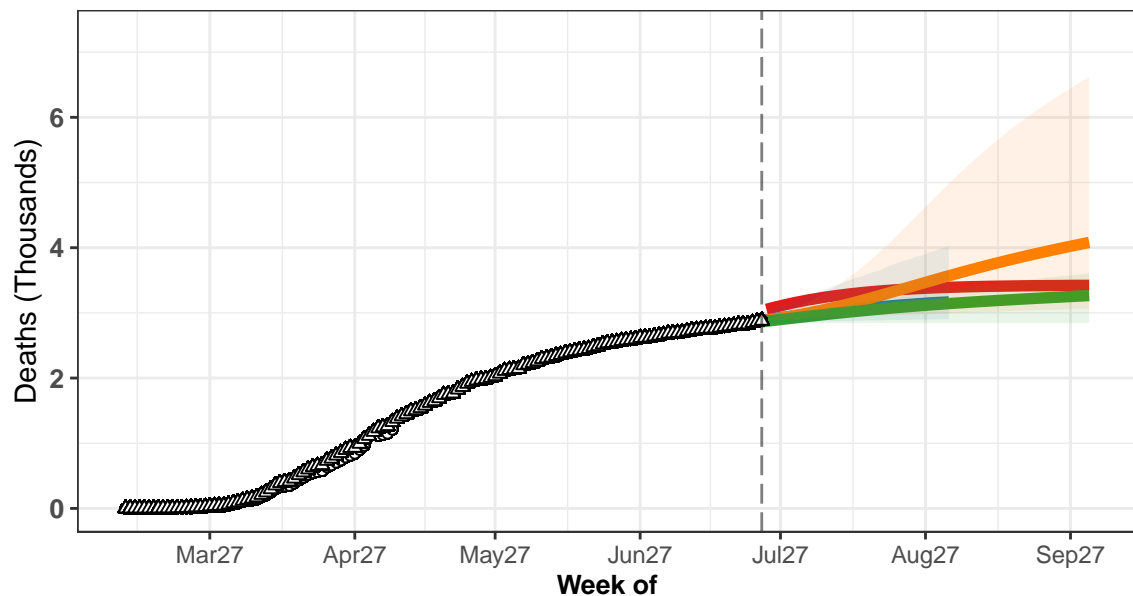

## Cumulative Out-Of-Sample Error (Post Intercept Shift)

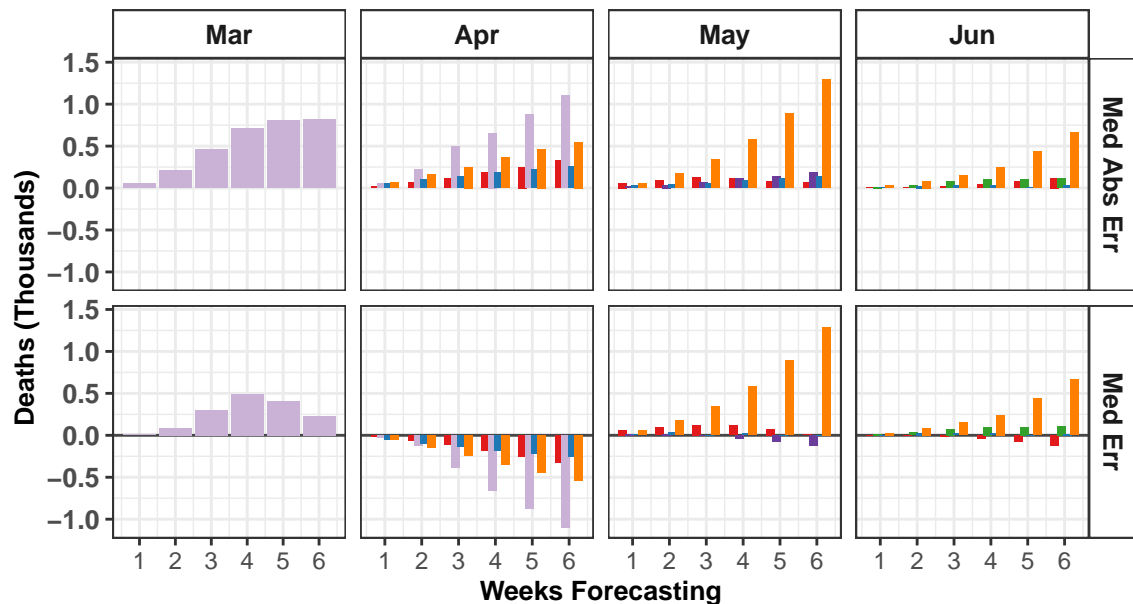

## All Model Versions

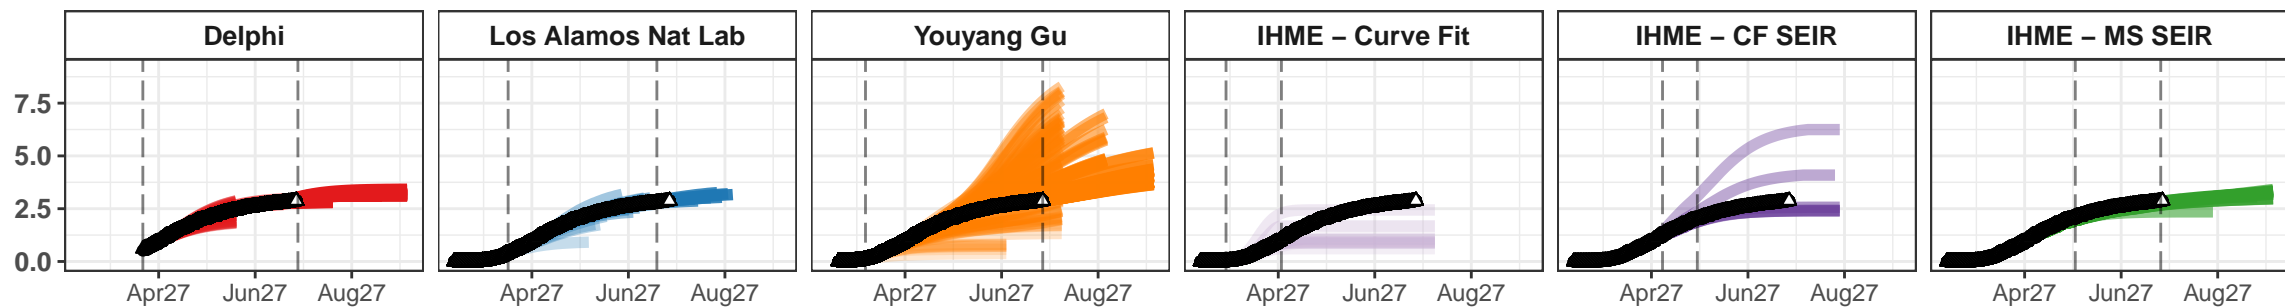

## All Cumulative Errors

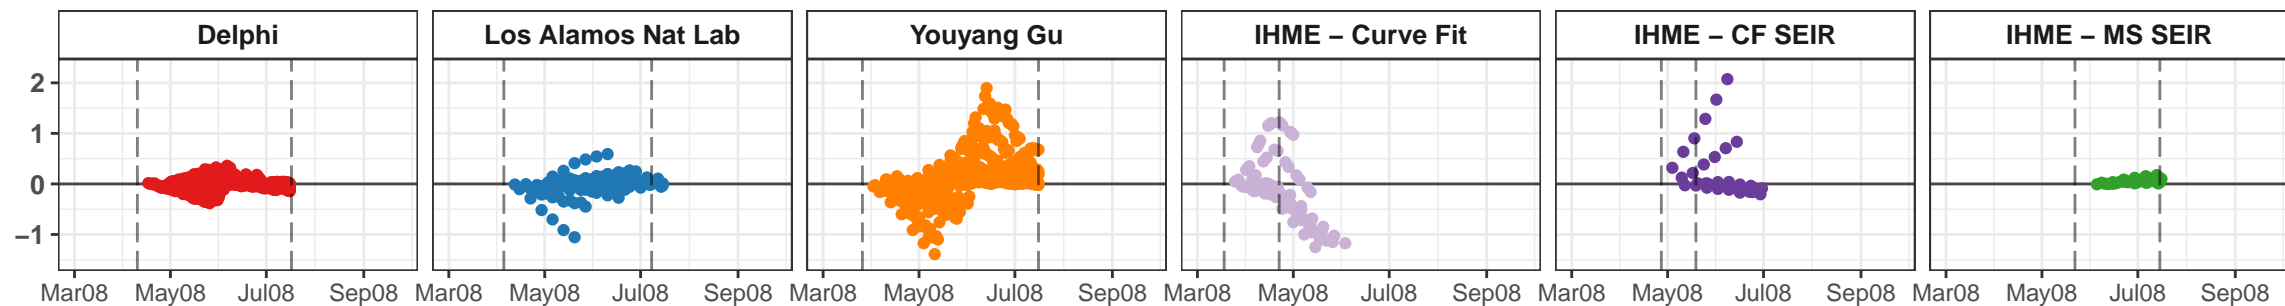

# Bangladesh

## Current Forecast

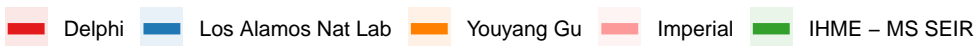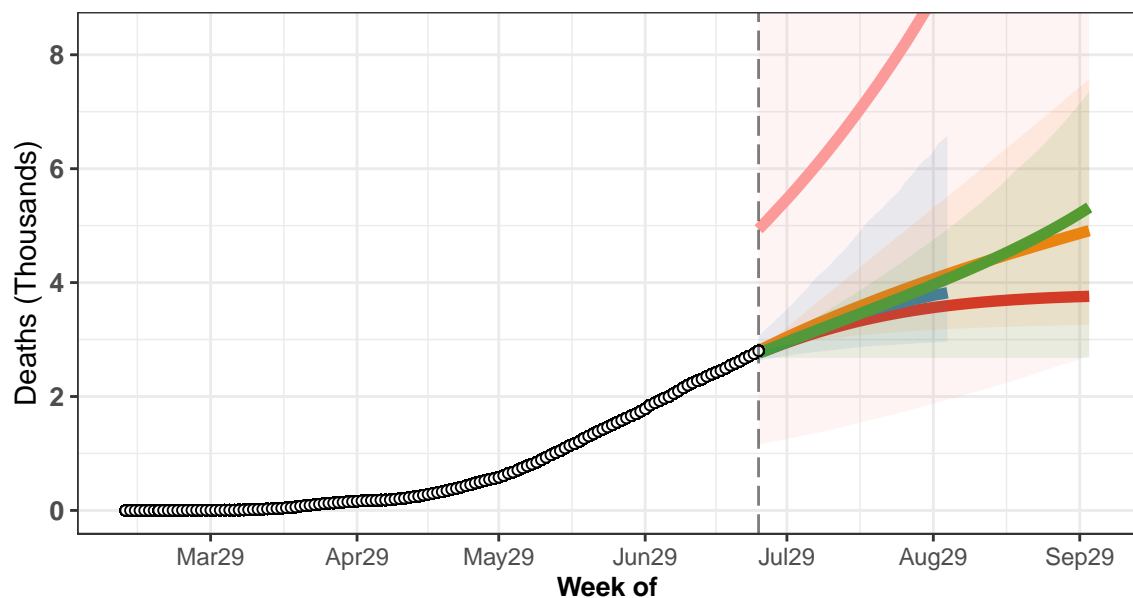

## Cumulative Out-Of-Sample Error (Post Intercept Shift)

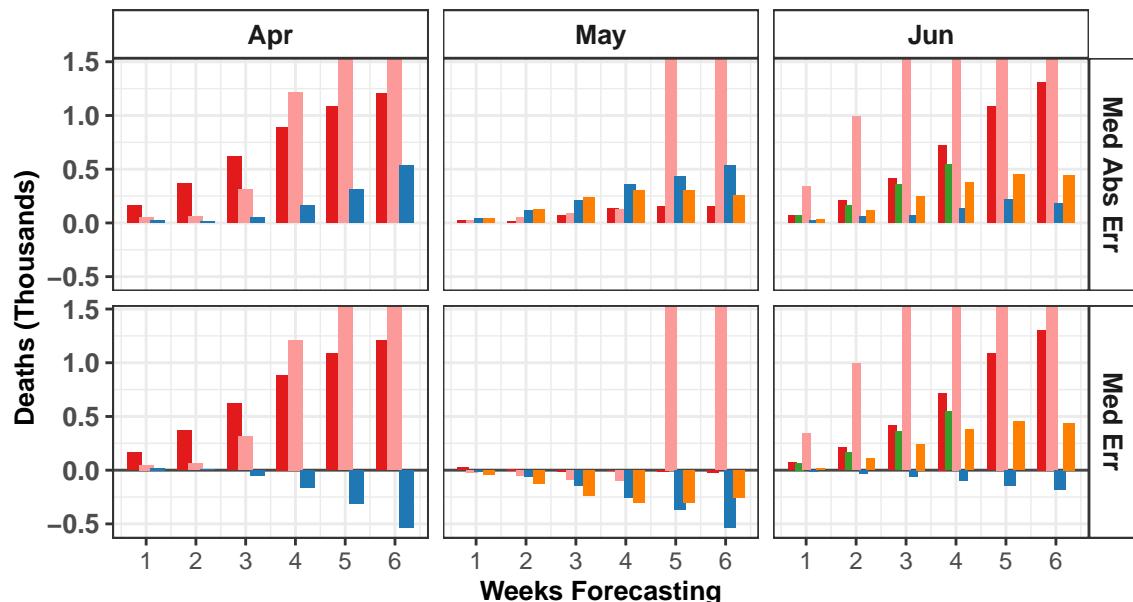

## All Model Versions

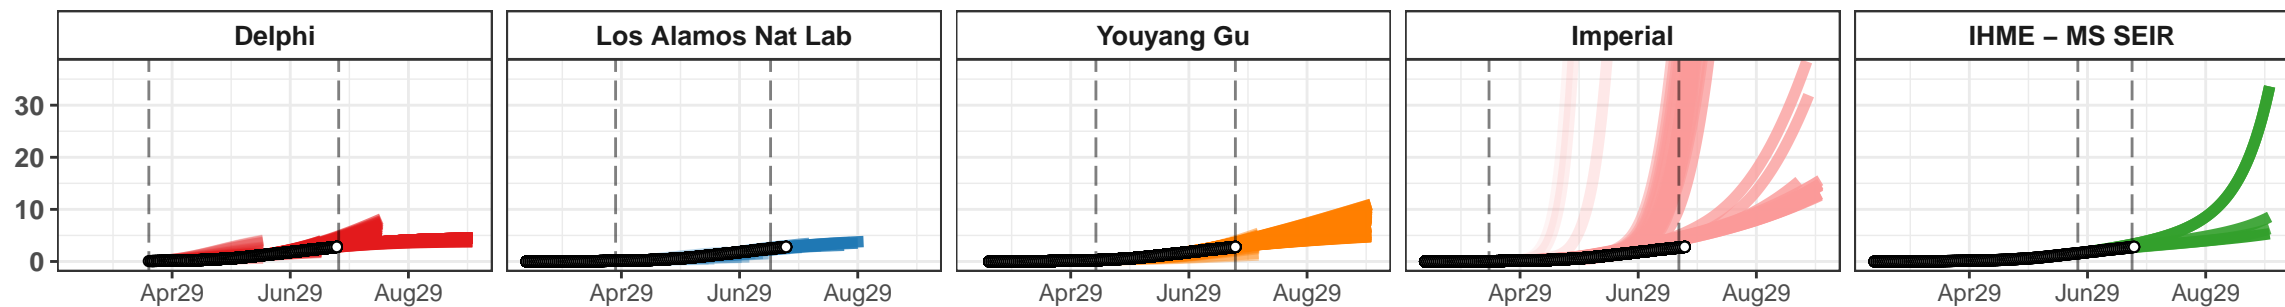

## All Cumulative Errors

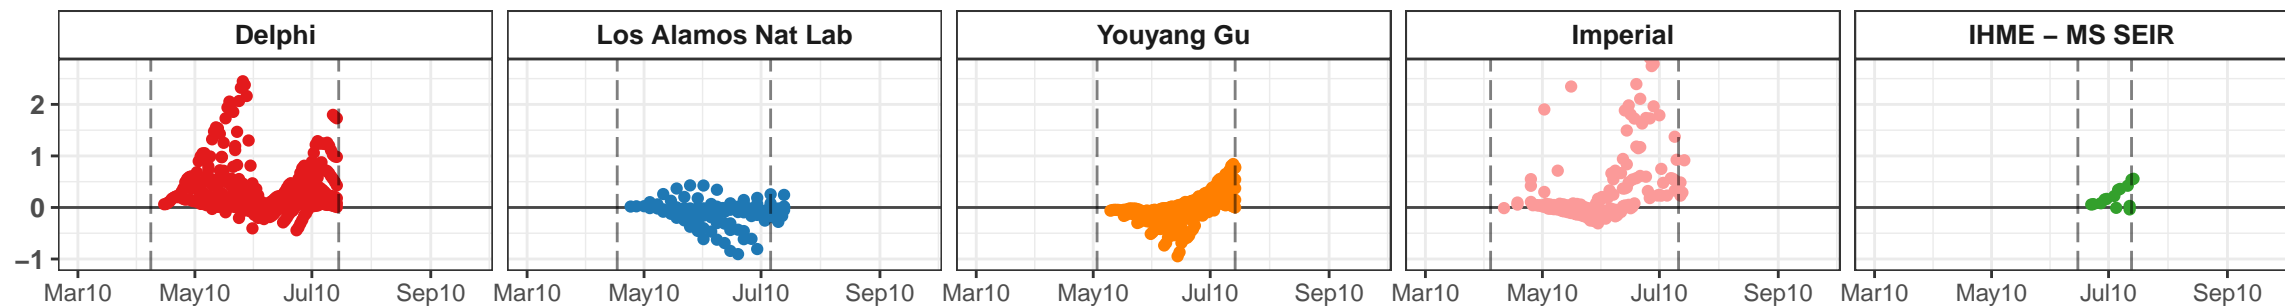

# Argentina

## Current Forecast

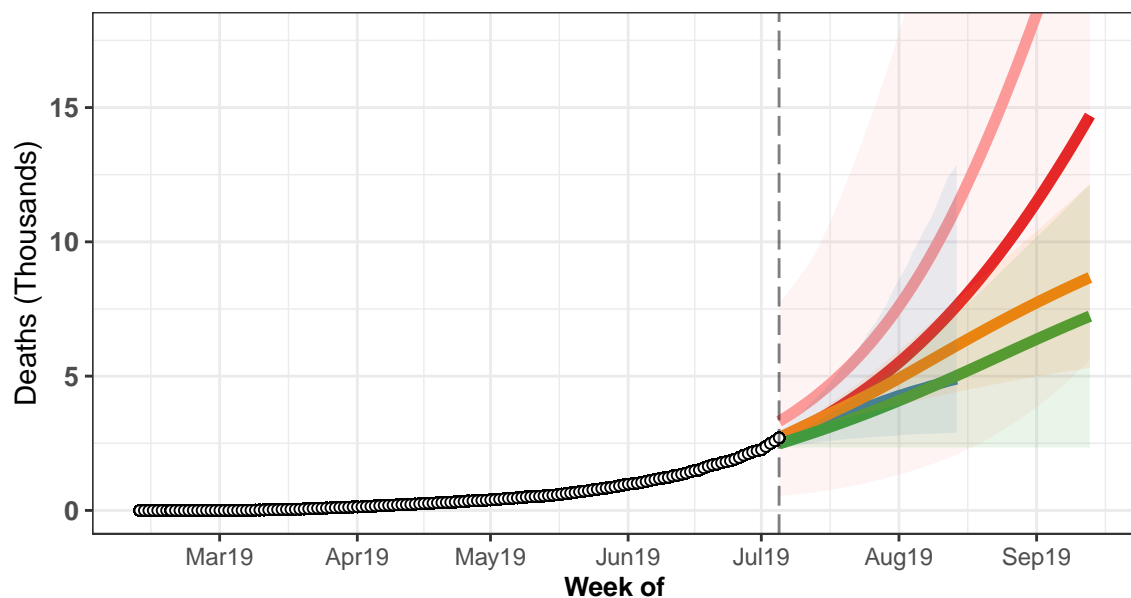

## Cumulative Out-Of-Sample Error (Post Intercept Shift)

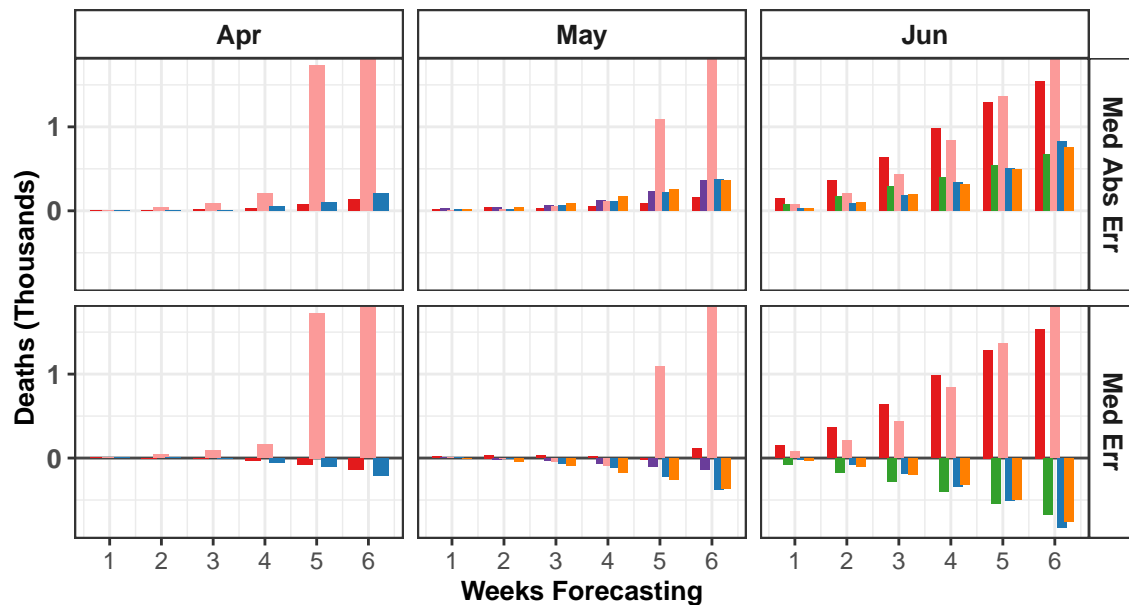

## All Model Versions

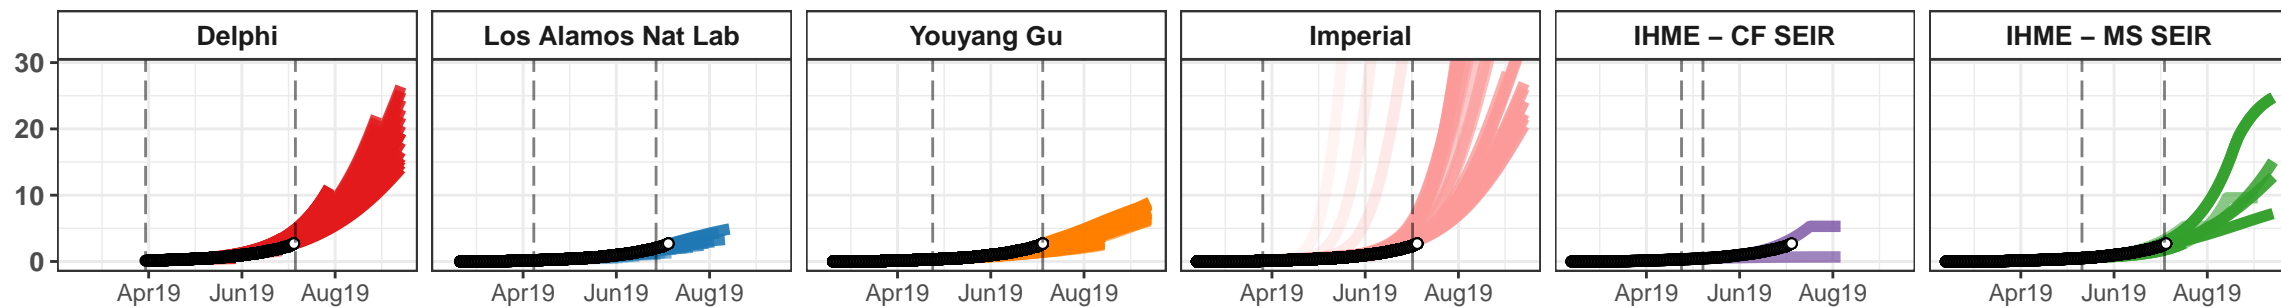

## All Cumulative Errors

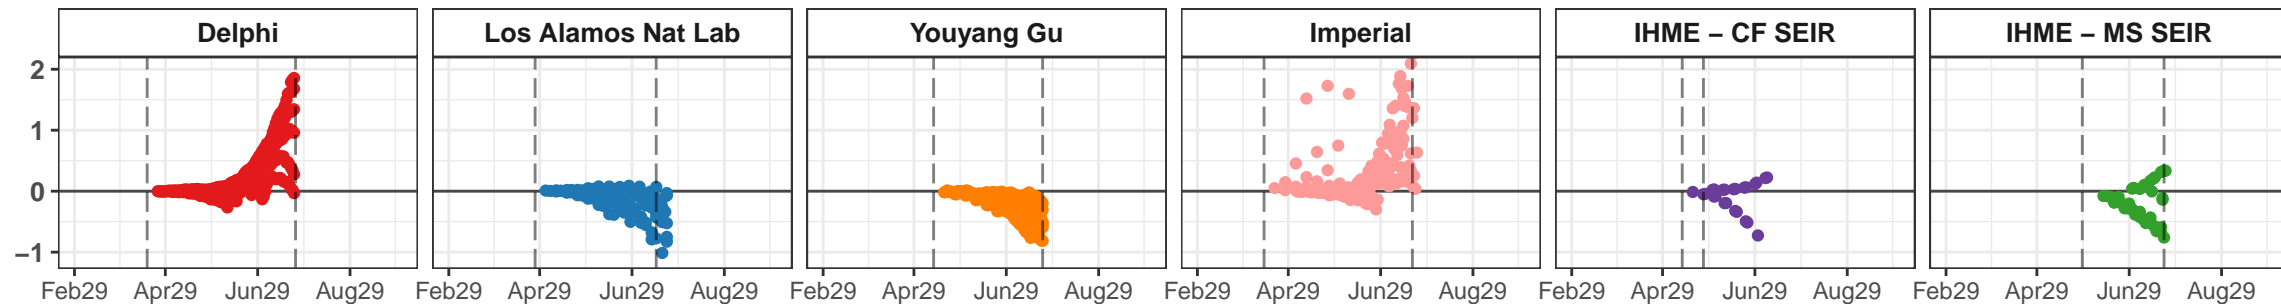

# Saudi Arabia

## Current Forecast

Delphi Los Alamos Nat Lab Youyang Gu Imperial

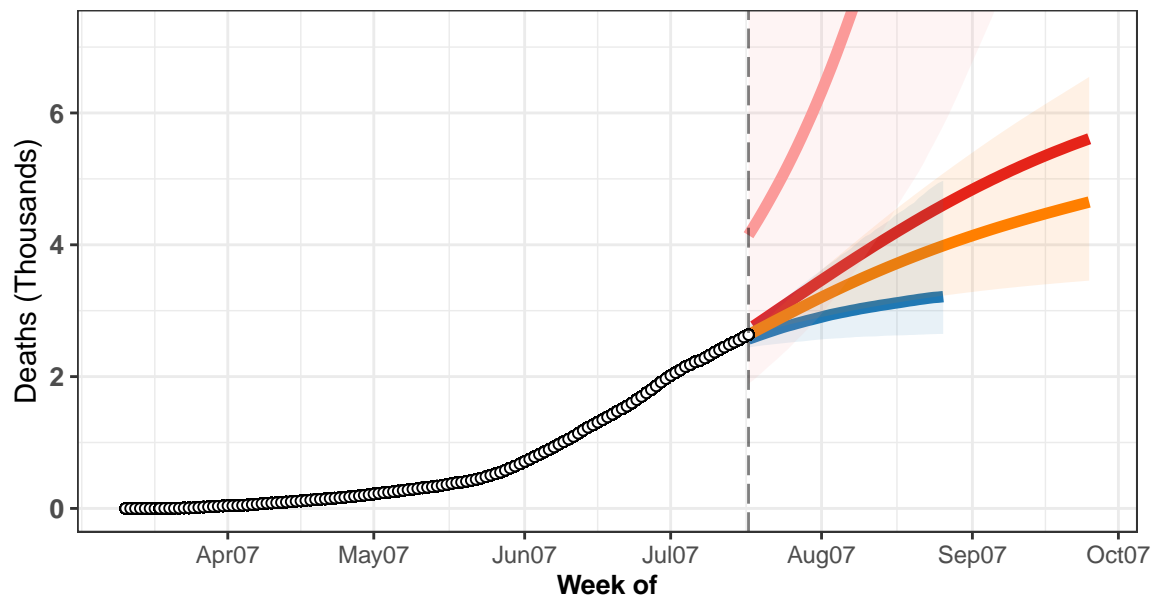

## Cumulative Out-Of-Sample Error (Post Intercept Shift)

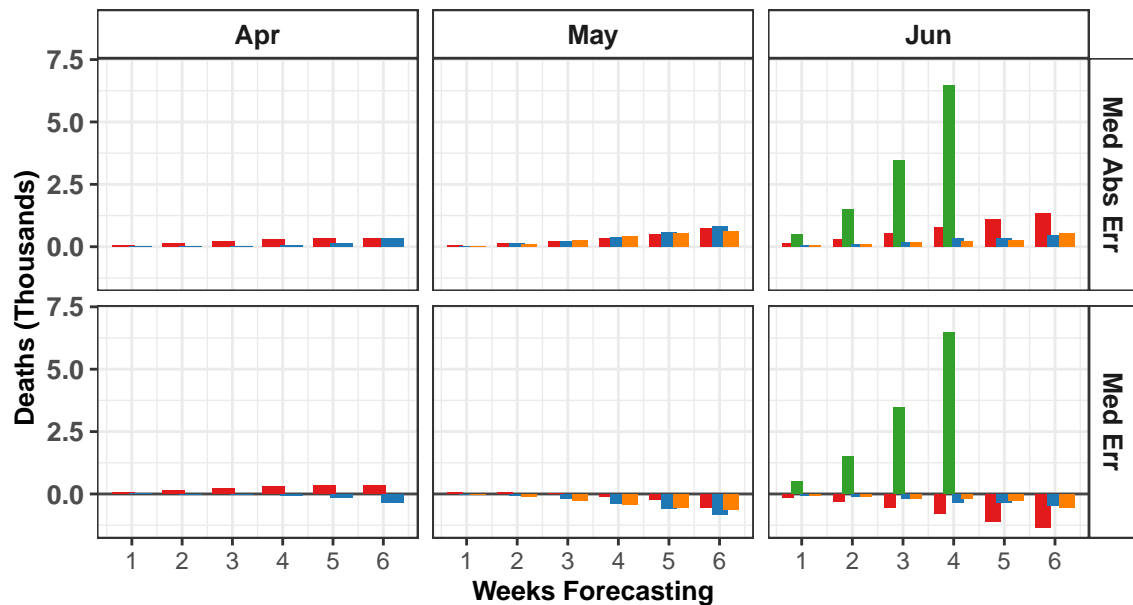

## All Model Versions

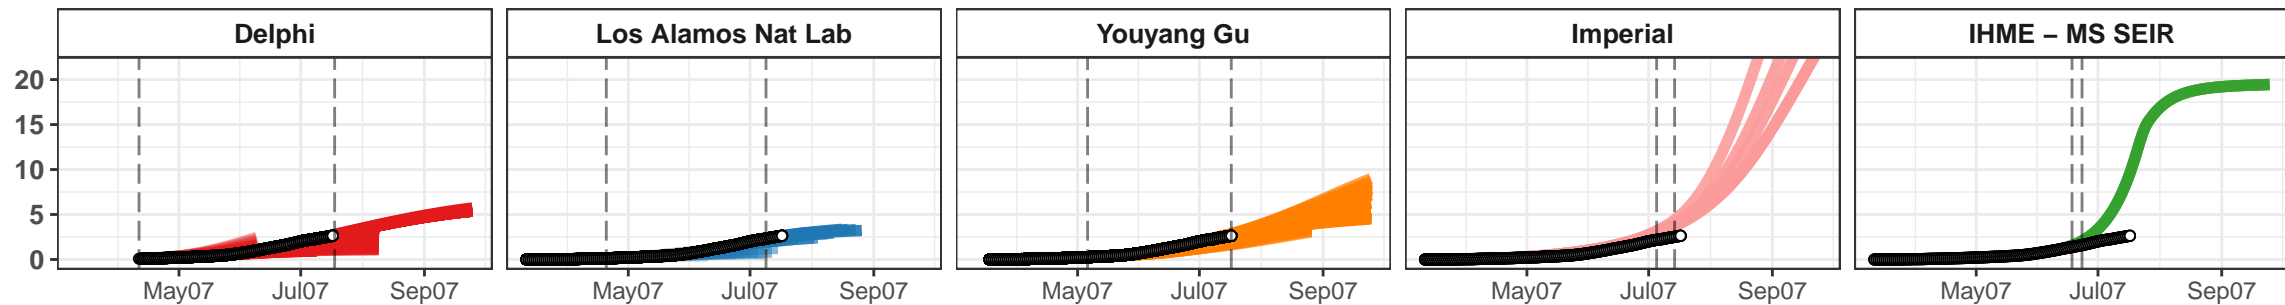

## All Cumulative Errors

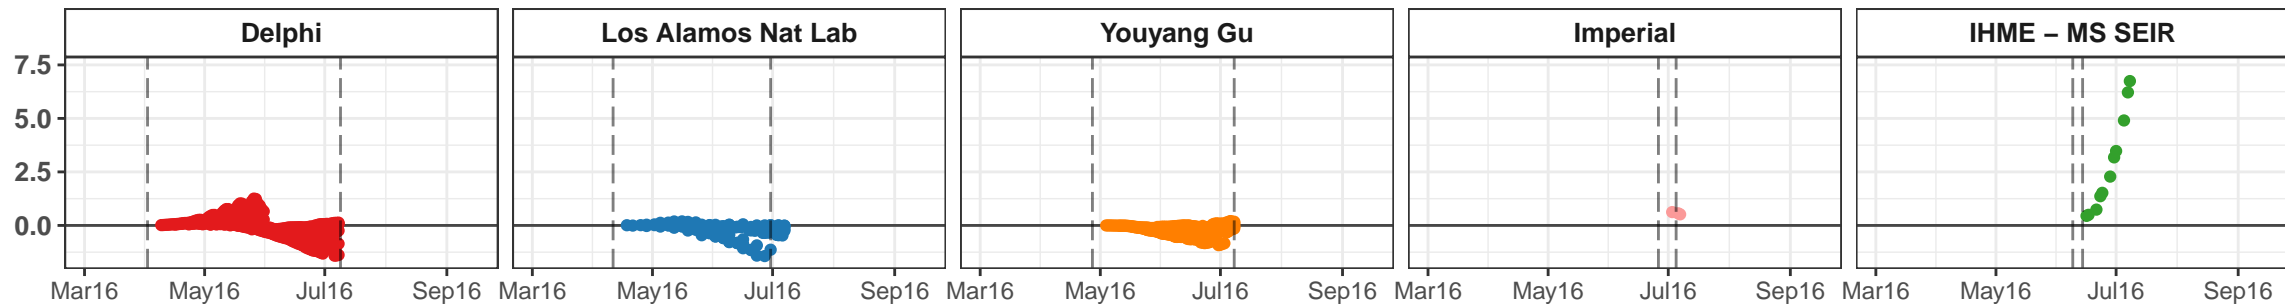

# Bolivia

## Current Forecast

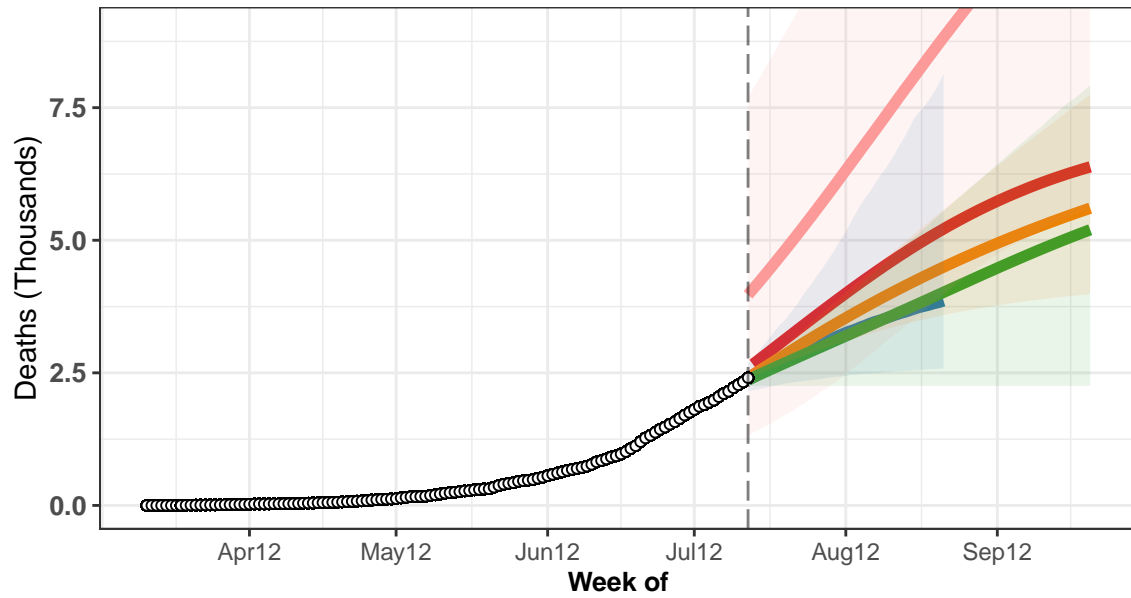

## Cumulative Out-Of-Sample Error (Post Intercept Shift)

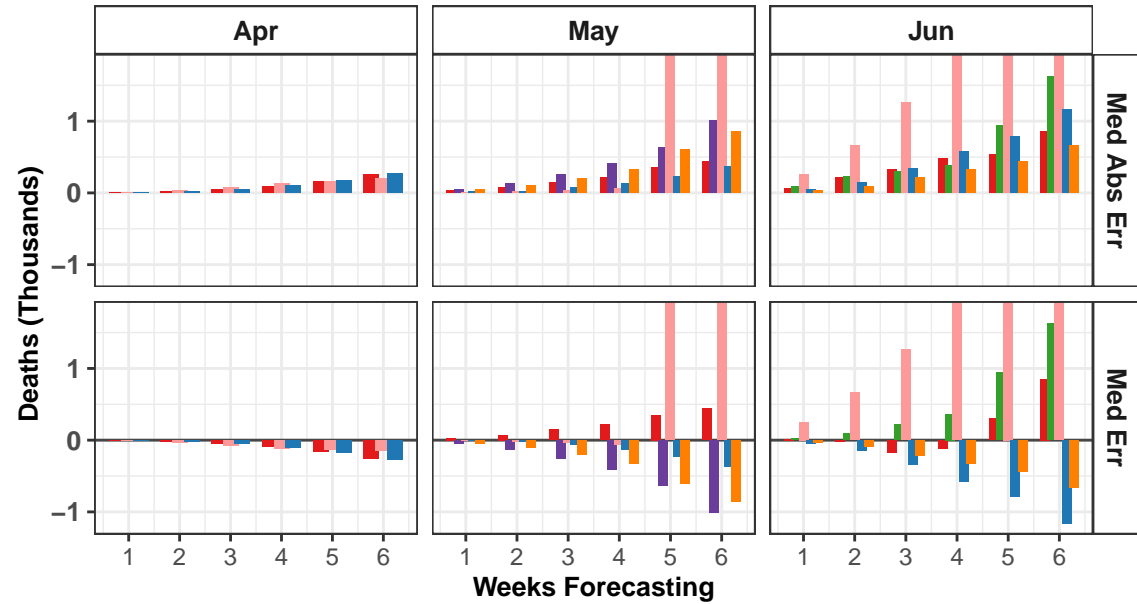

## All Model Versions

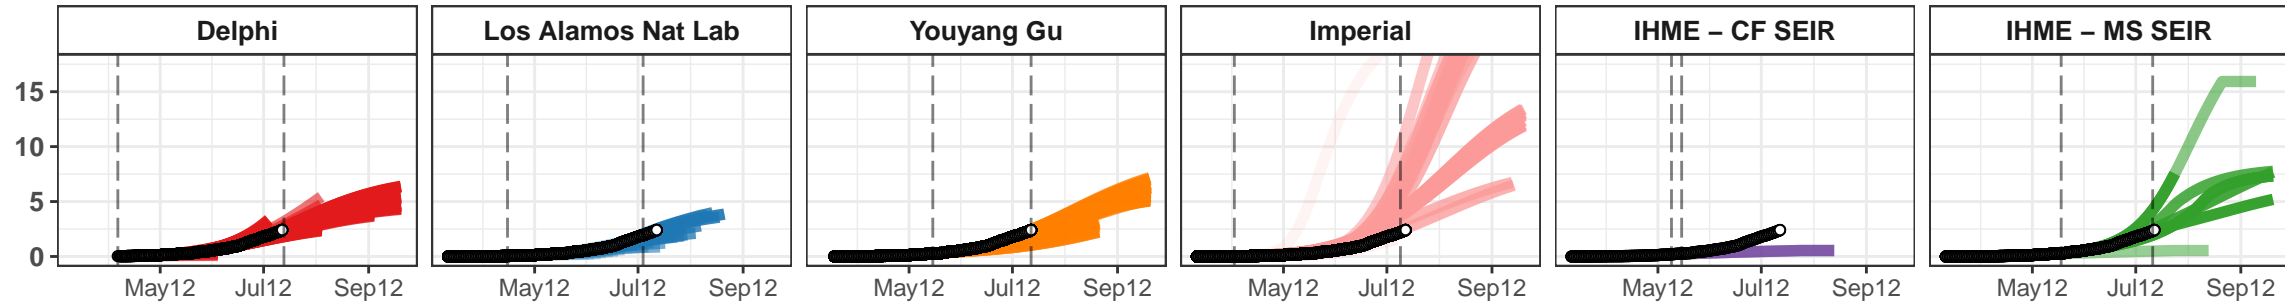

## All Cumulative Errors

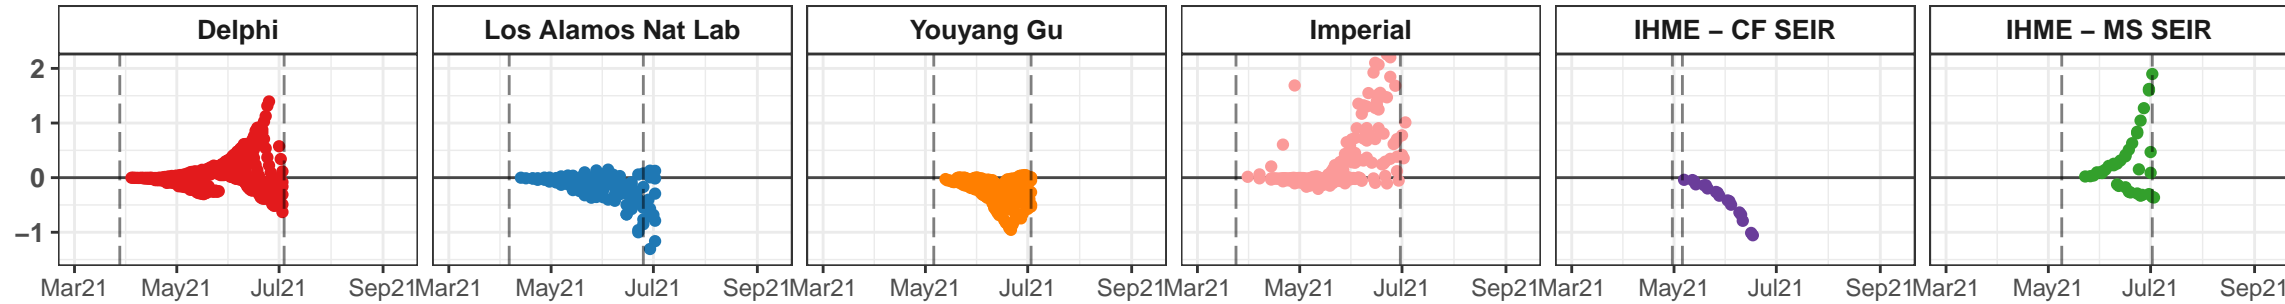



# Romania

## Current Forecast

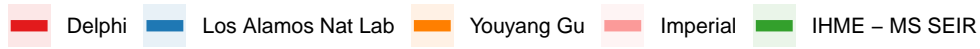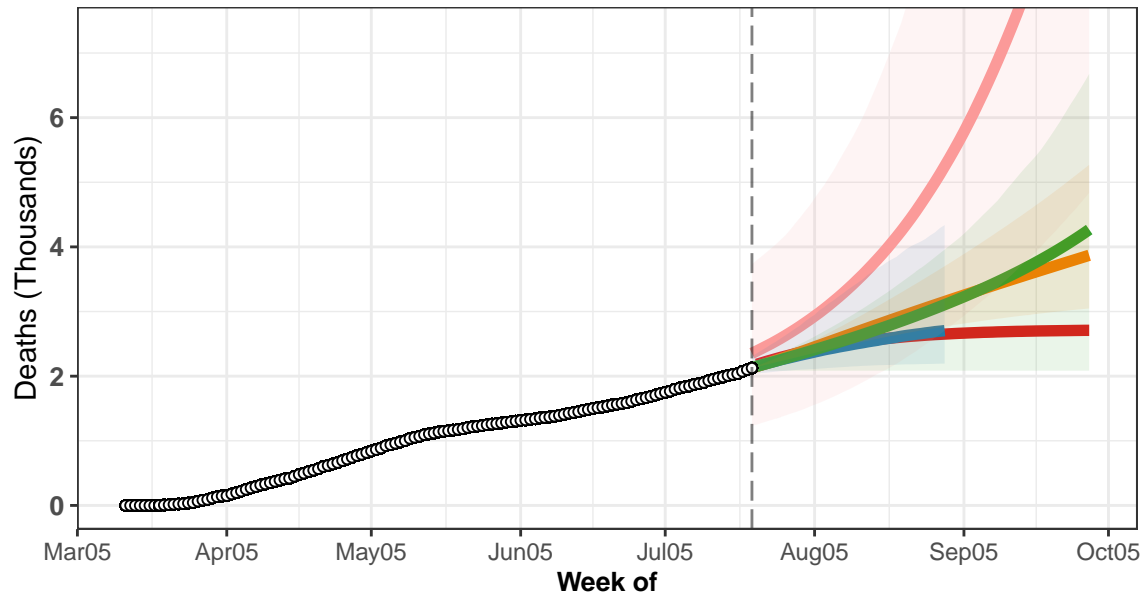

## Cumulative Out-Of-Sample Error (Post Intercept Shift)

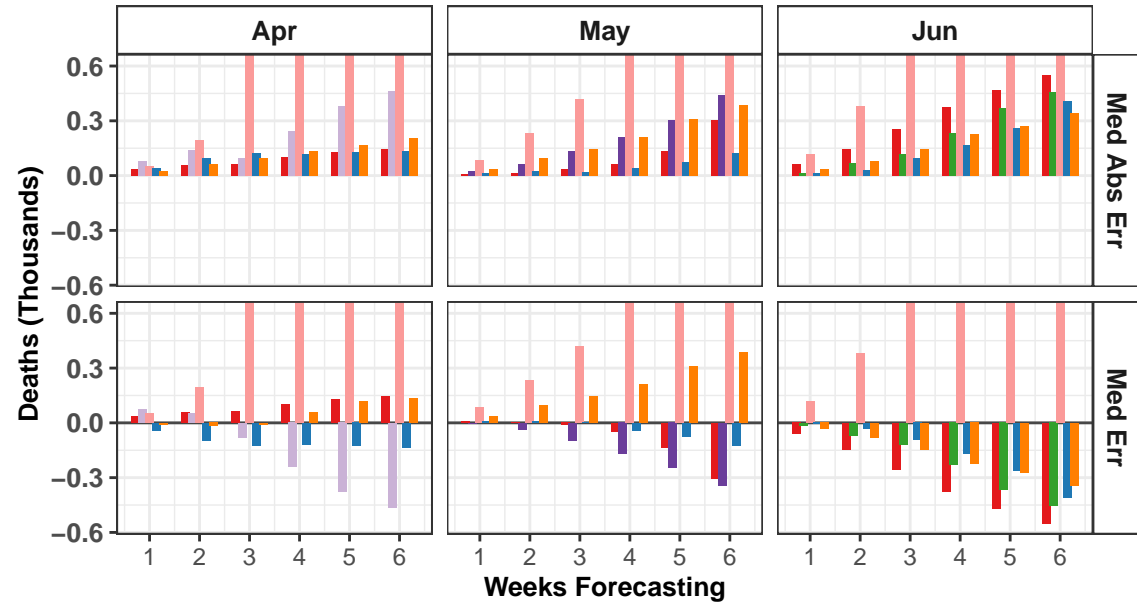

## All Model Versions

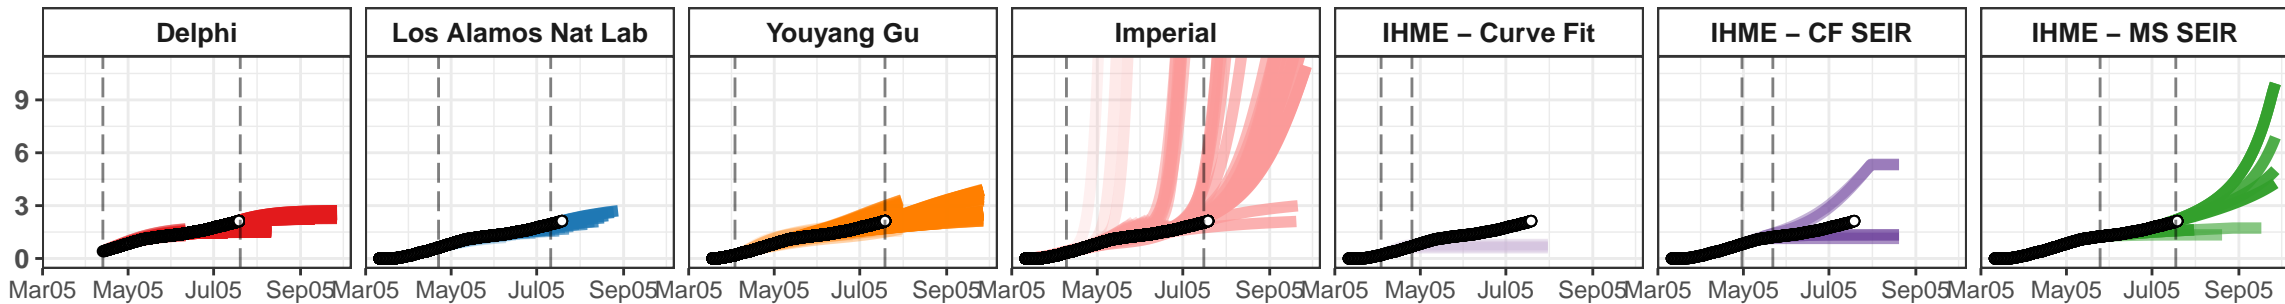

## All Cumulative Errors

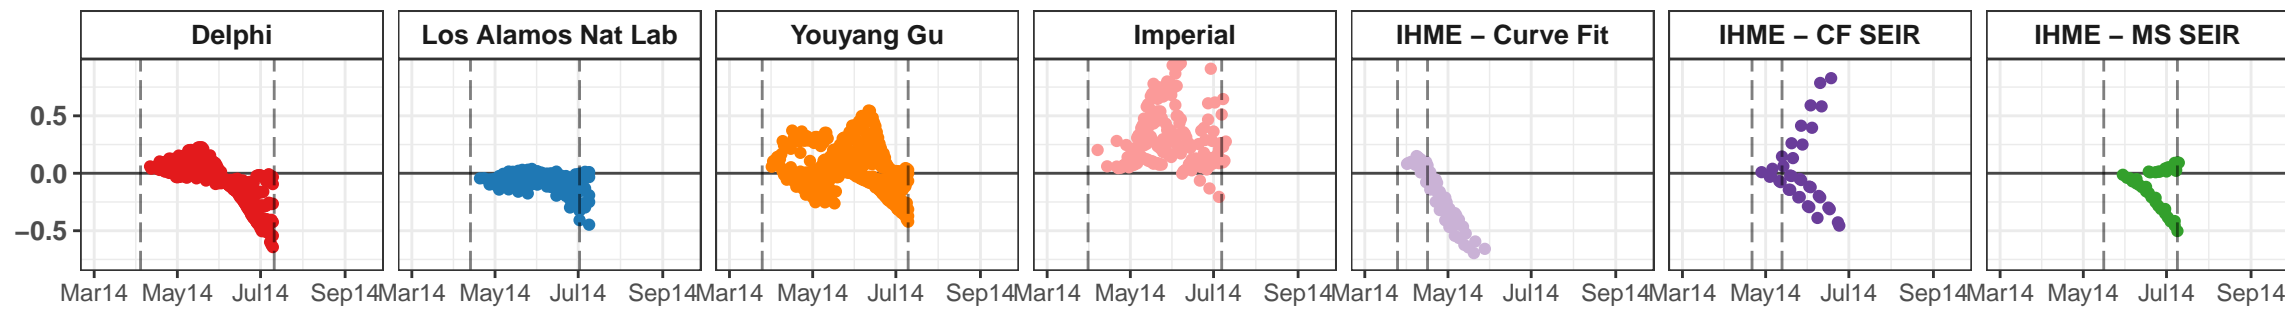

# Virginia

## Current Forecast

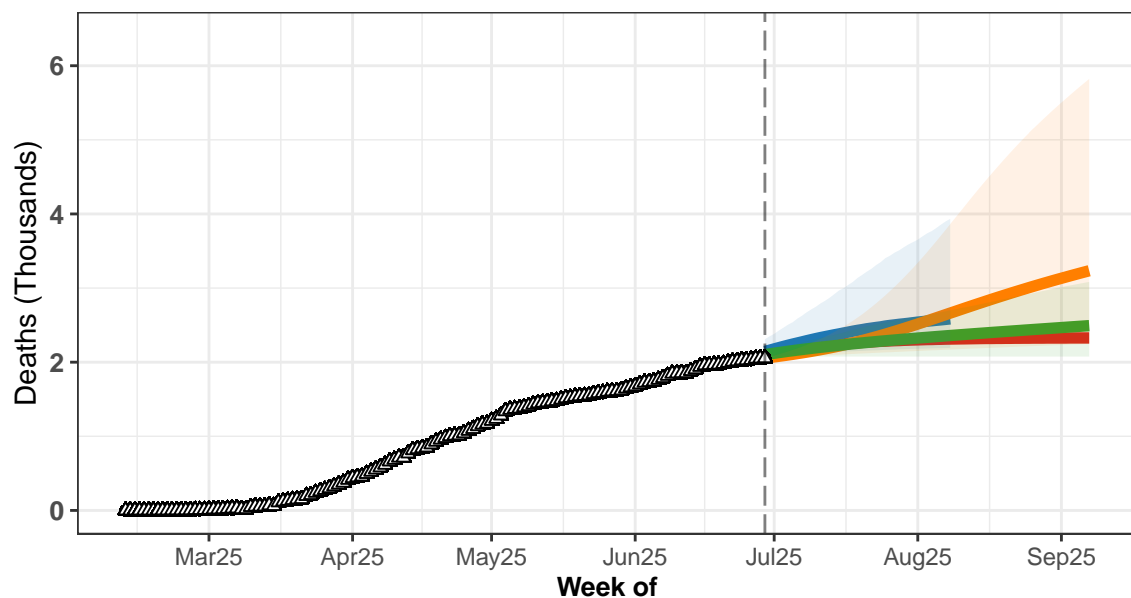

## Cumulative Out-Of-Sample Error (Post Intercept Shift)

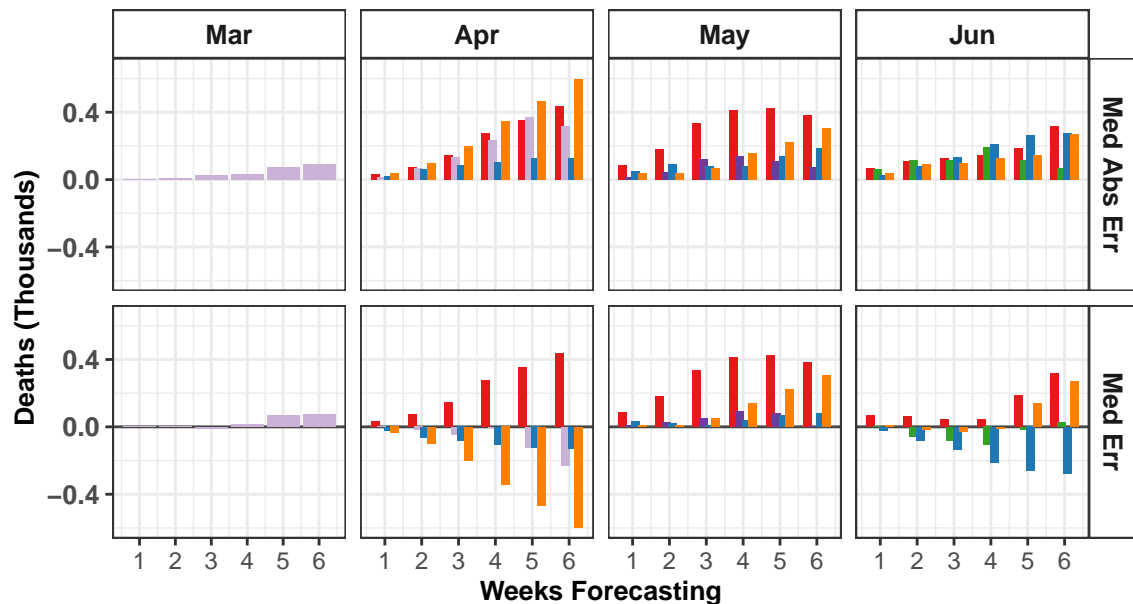

## All Model Versions

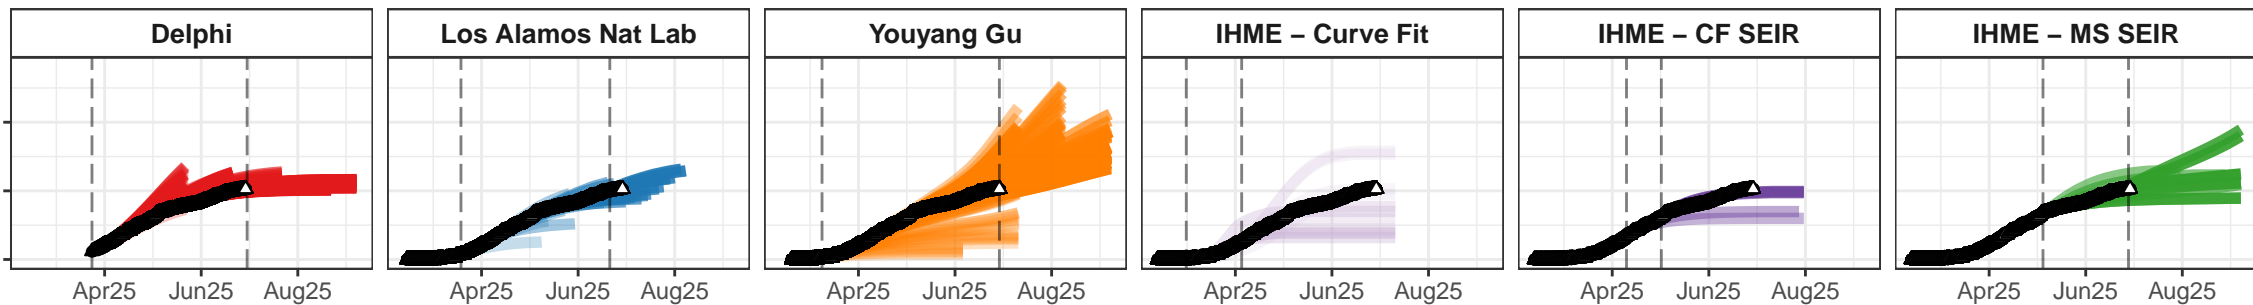

## All Cumulative Errors

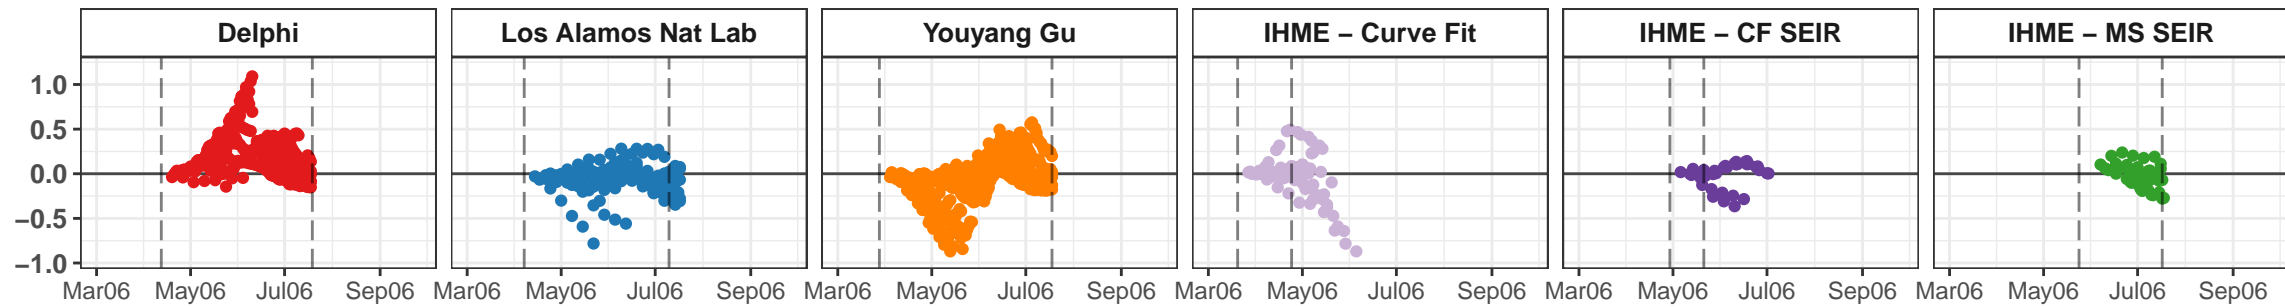

# Switzerland

## Current Forecast

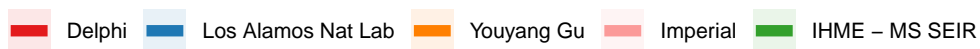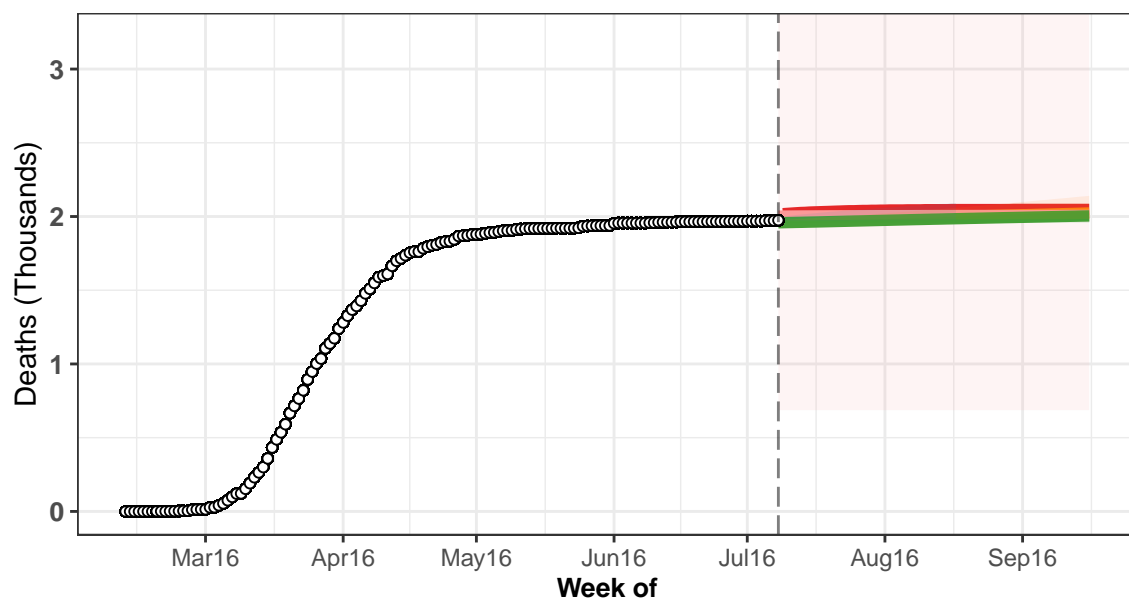

## Cumulative Out-Of-Sample Error (Post Intercept Shift)

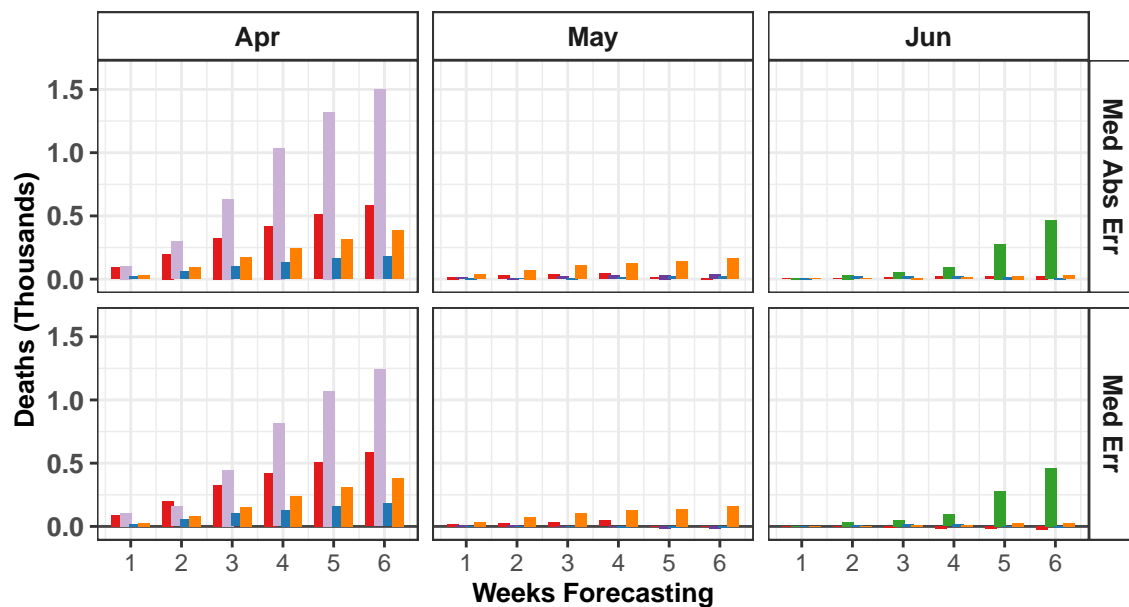

## All Model Versions

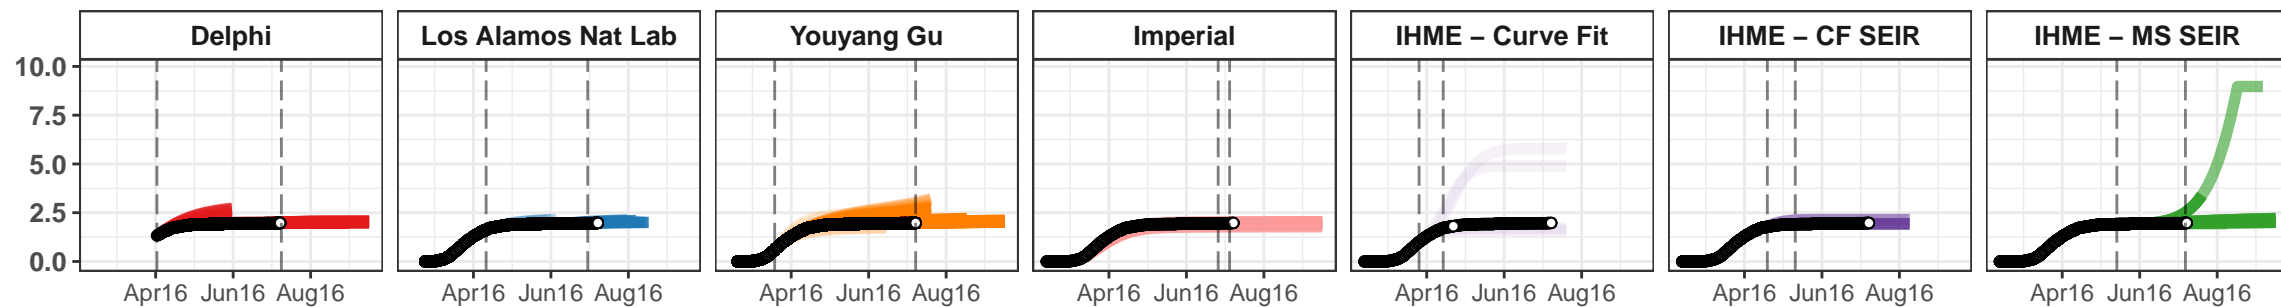

## All Cumulative Errors

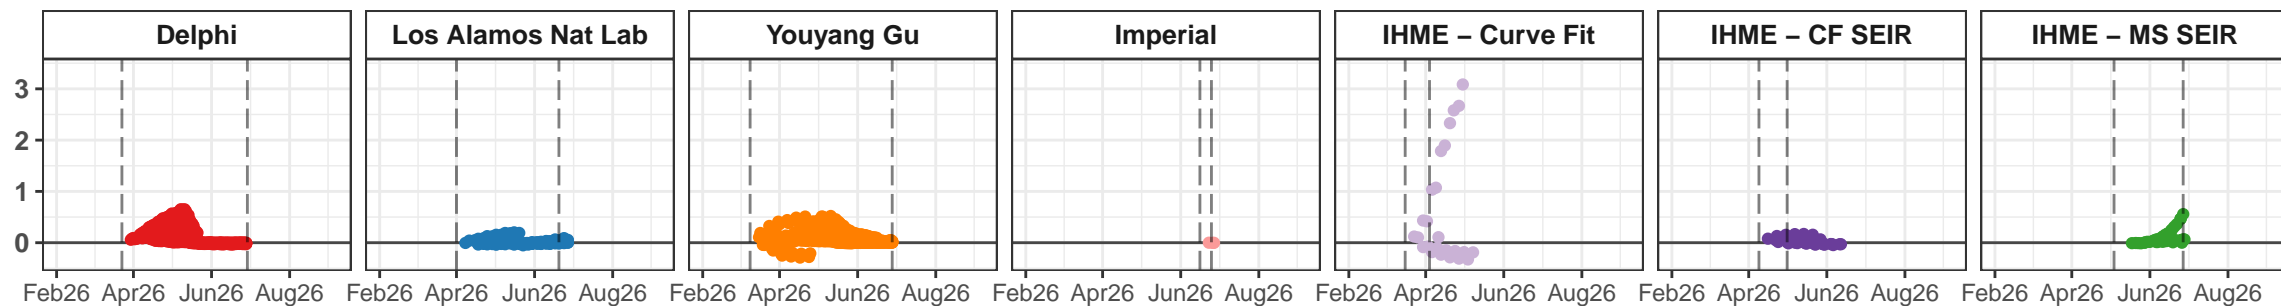

# Philippines

## Current Forecast

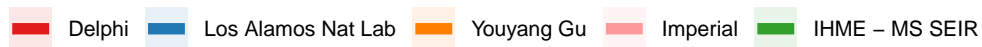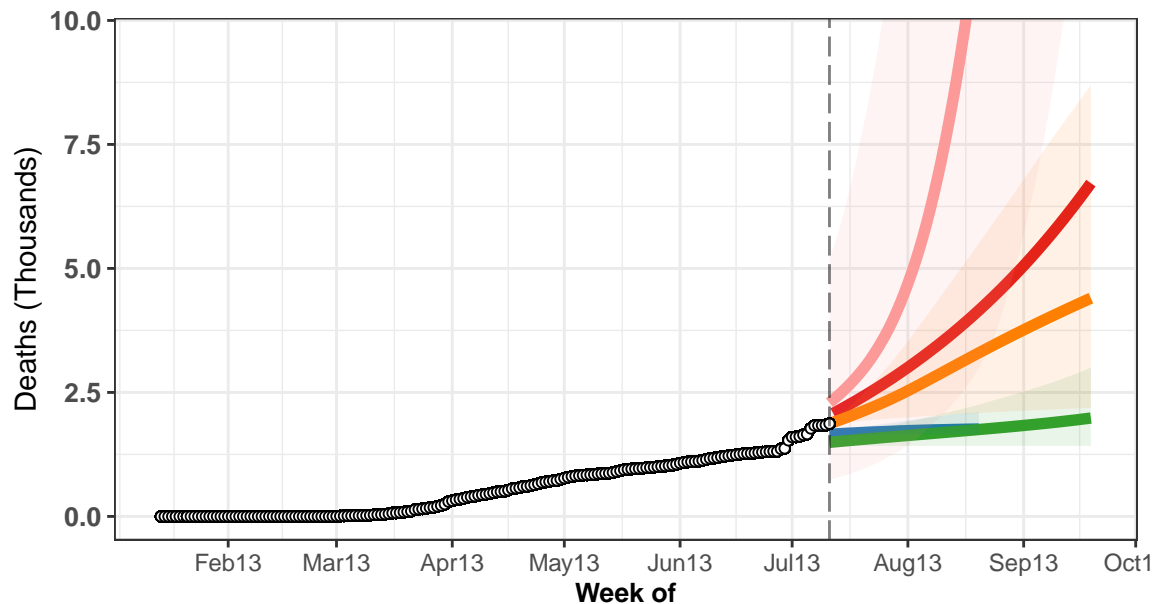

## Cumulative Out-Of-Sample Error (Post Intercept Shift)

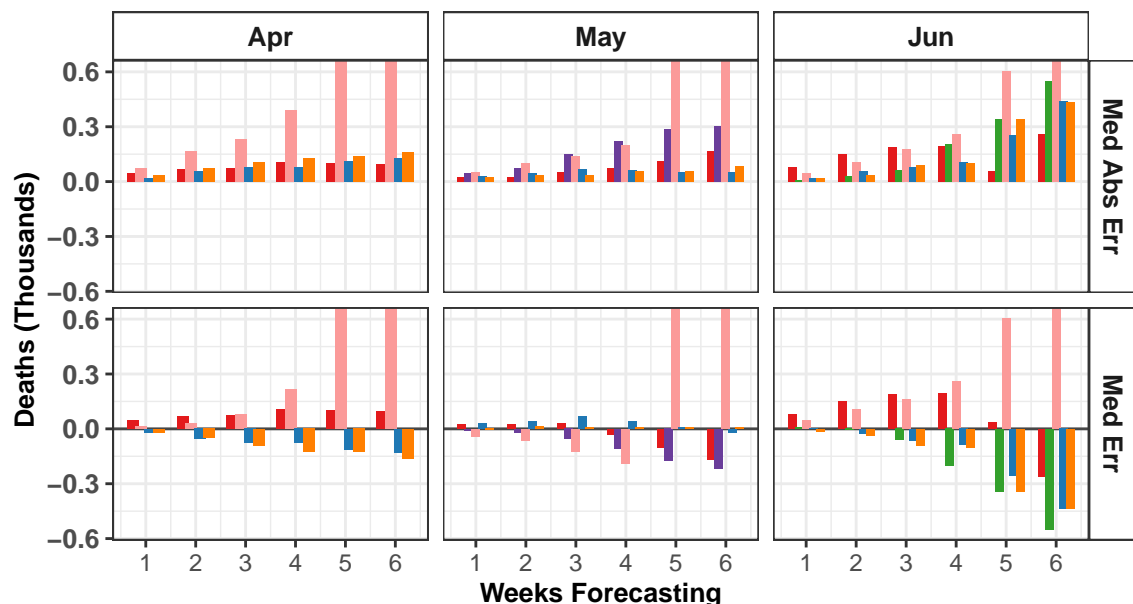

## All Model Versions

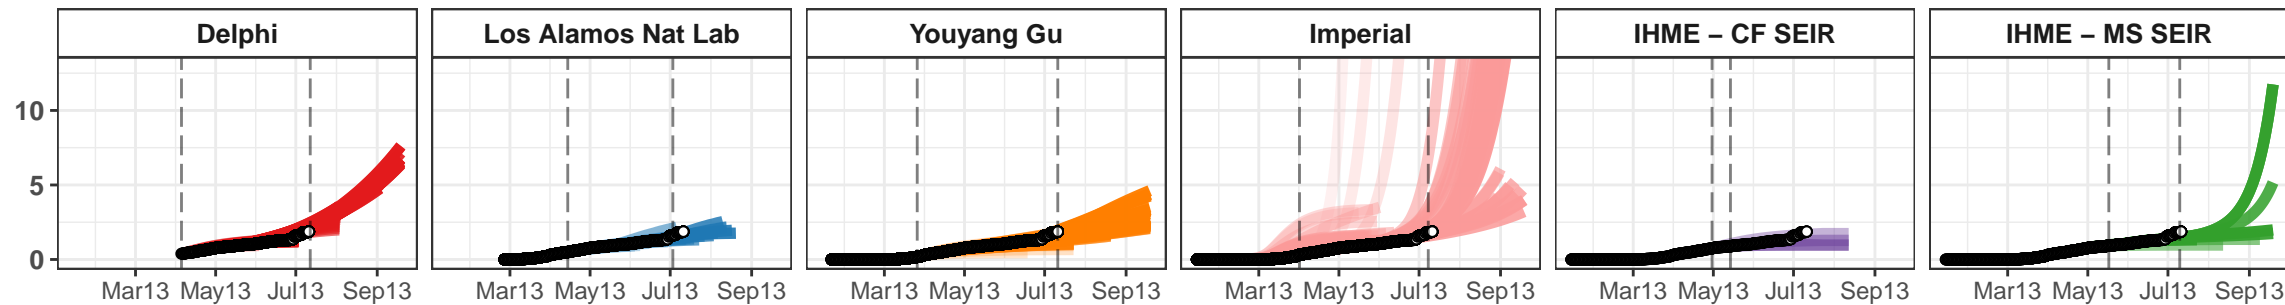

## All Cumulative Errors

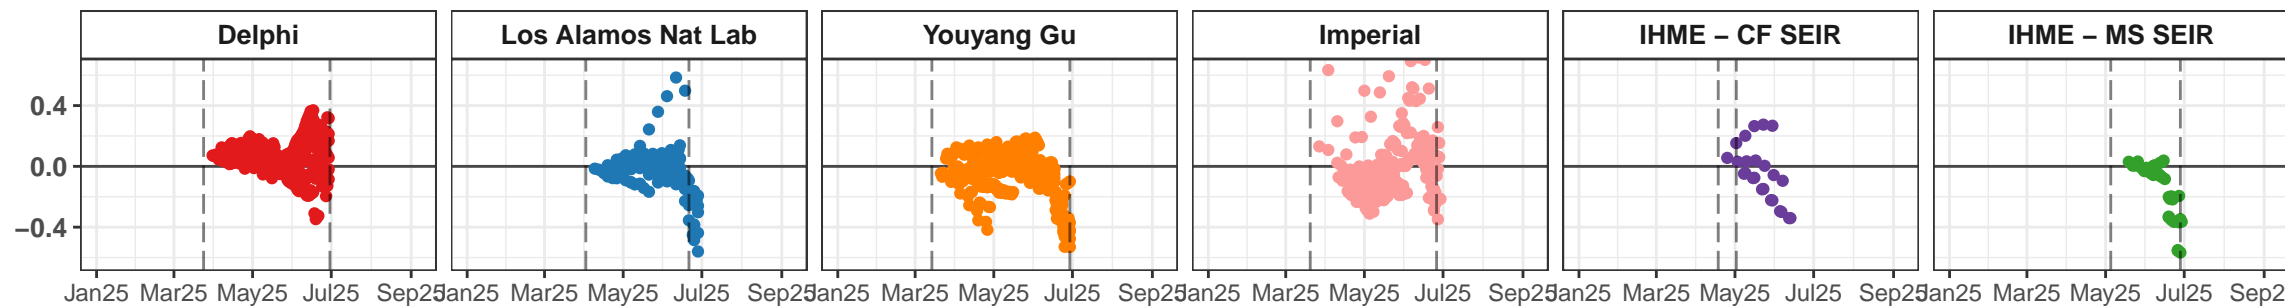

# Colorado

## Current Forecast

Delphi Los Alamos Nat Lab Youyang Gu IHME – MS SEIR ○ JHU △ NYT

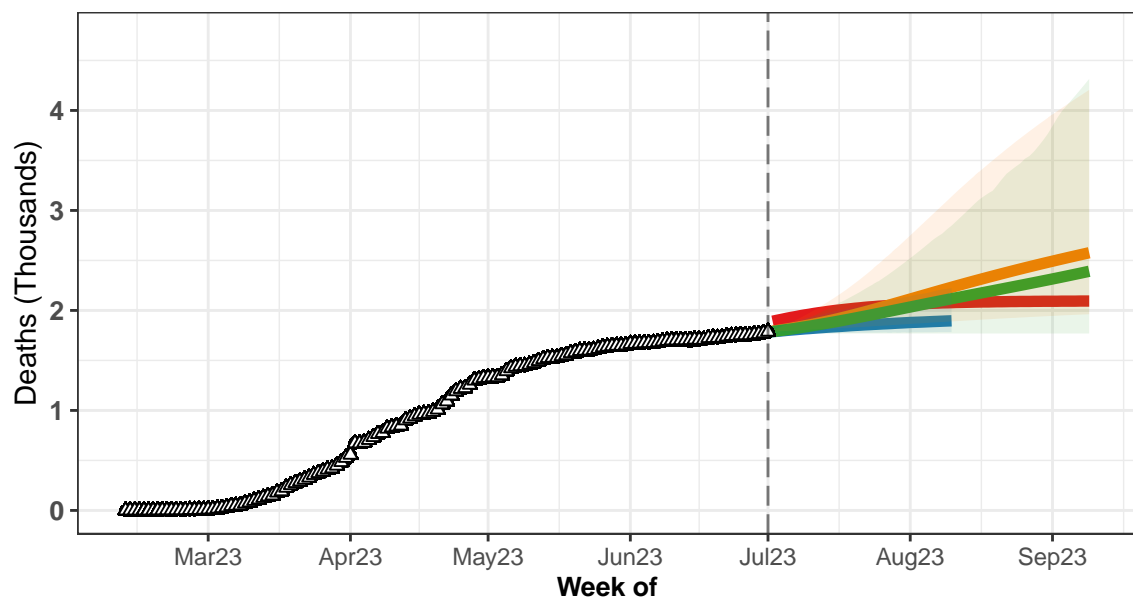

## Cumulative Out-Of-Sample Error (Post Intercept Shift)

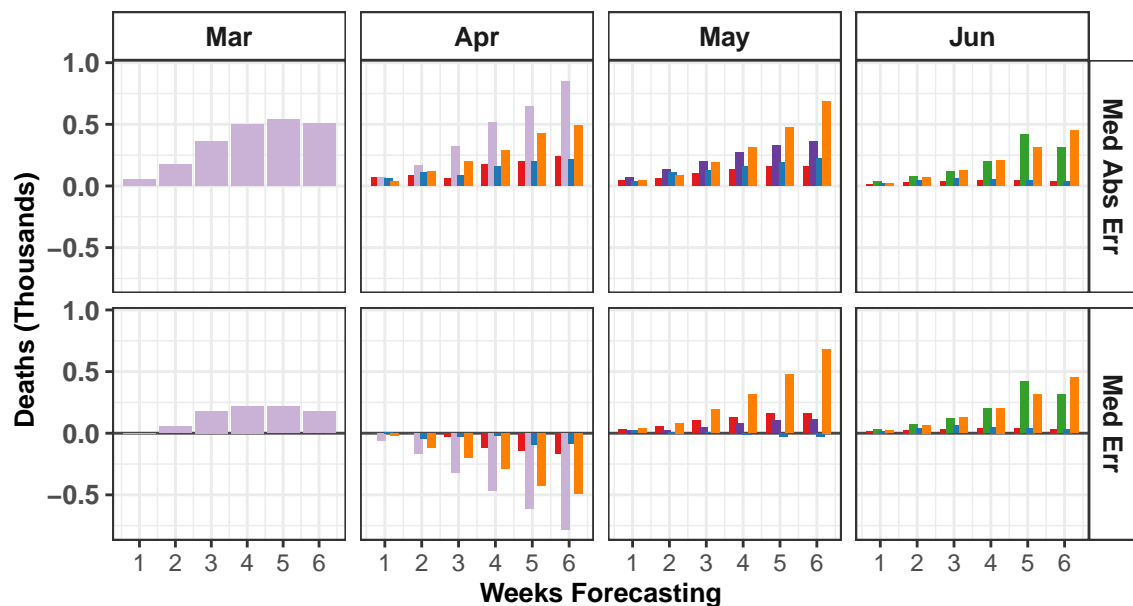

## All Model Versions

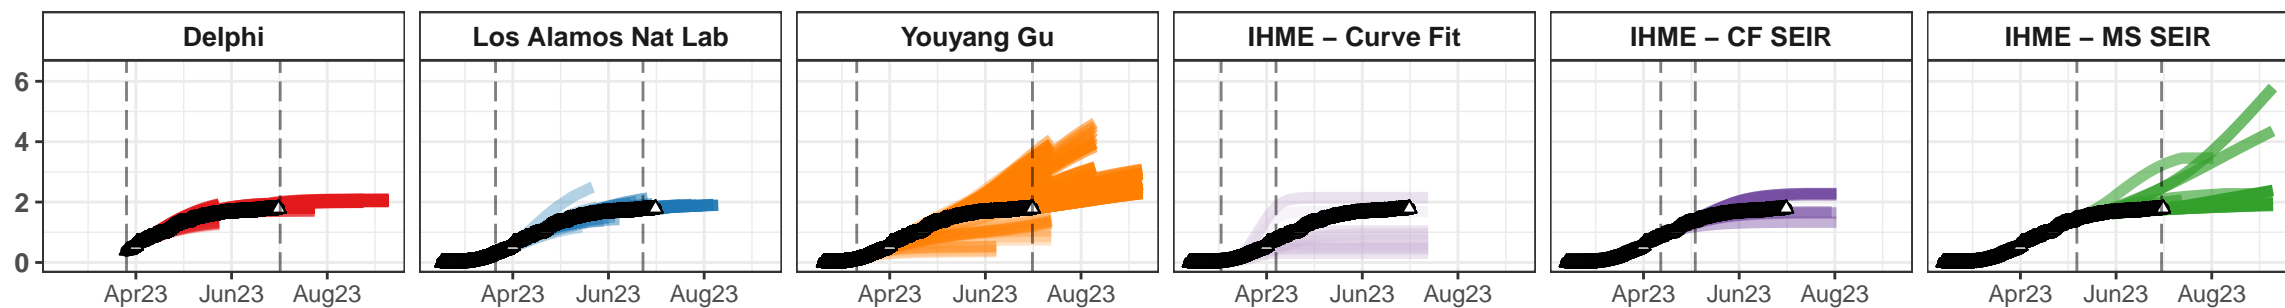

## All Cumulative Errors

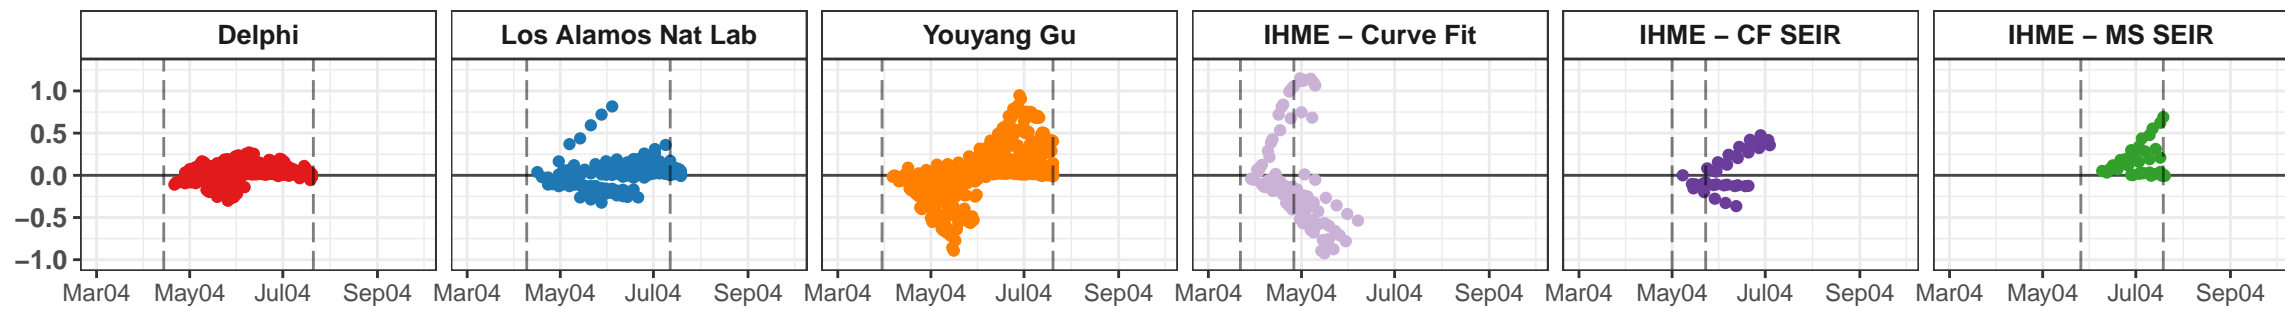

# Ireland

## Current Forecast

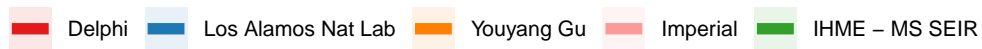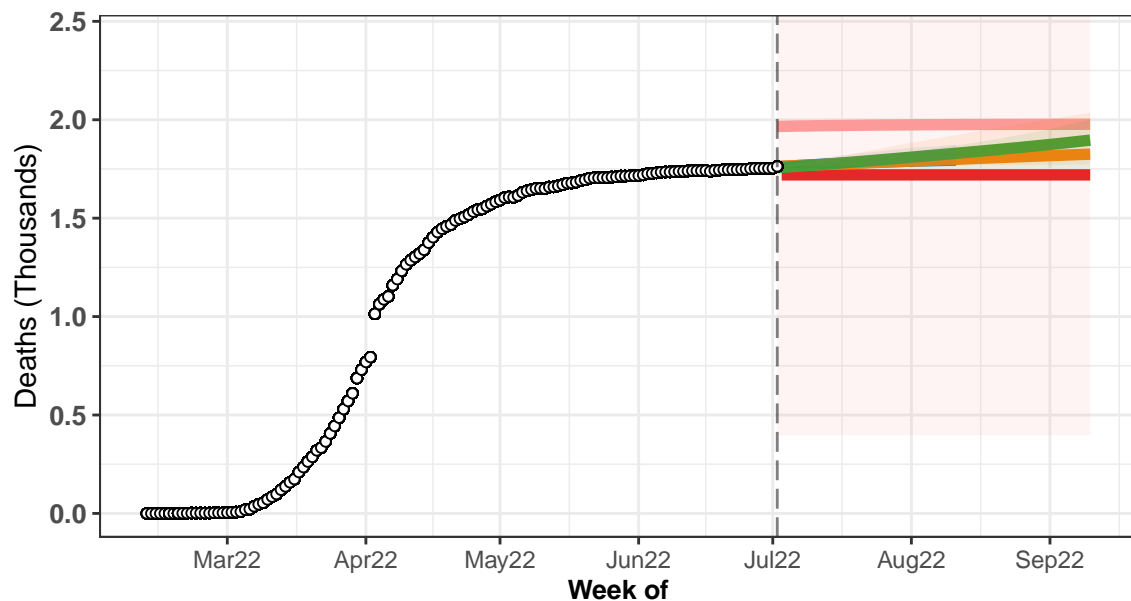

## Cumulative Out-Of-Sample Error (Post Intercept Shift)

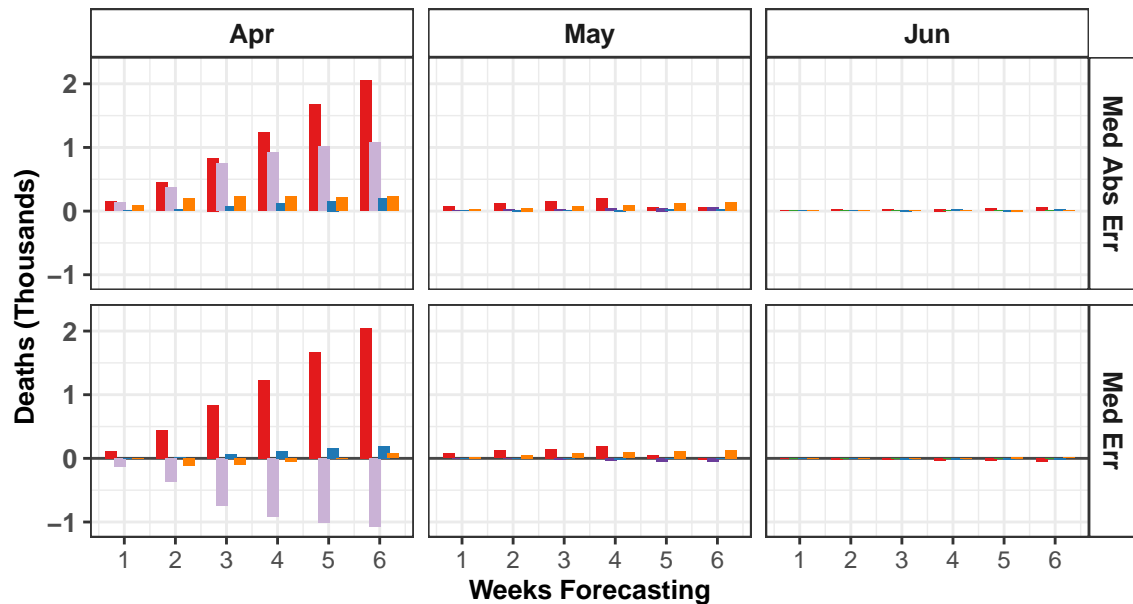

## All Model Versions

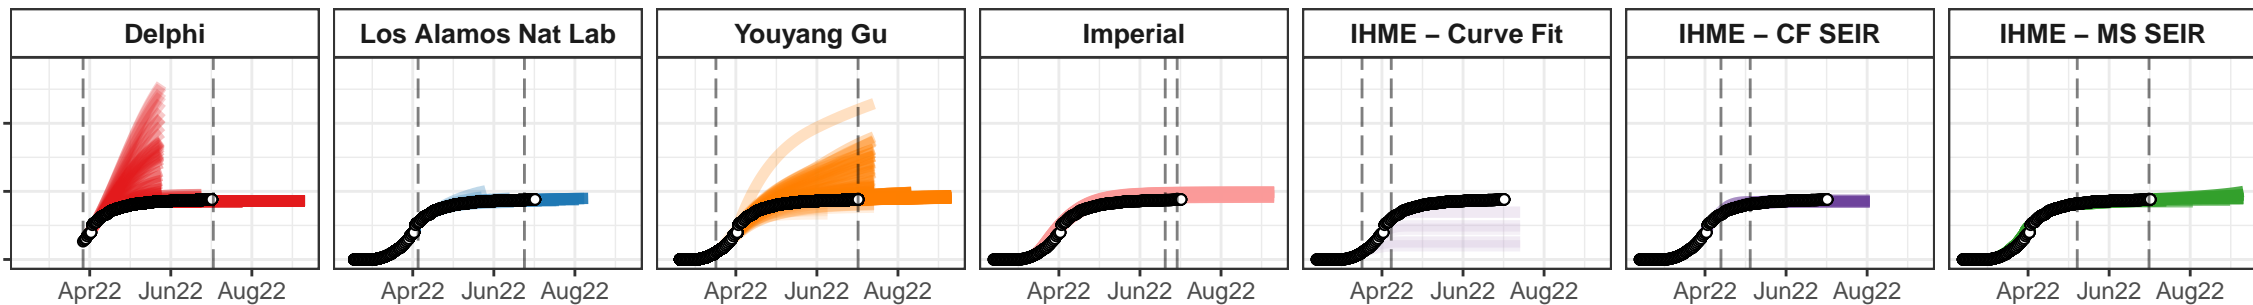

## All Cumulative Errors

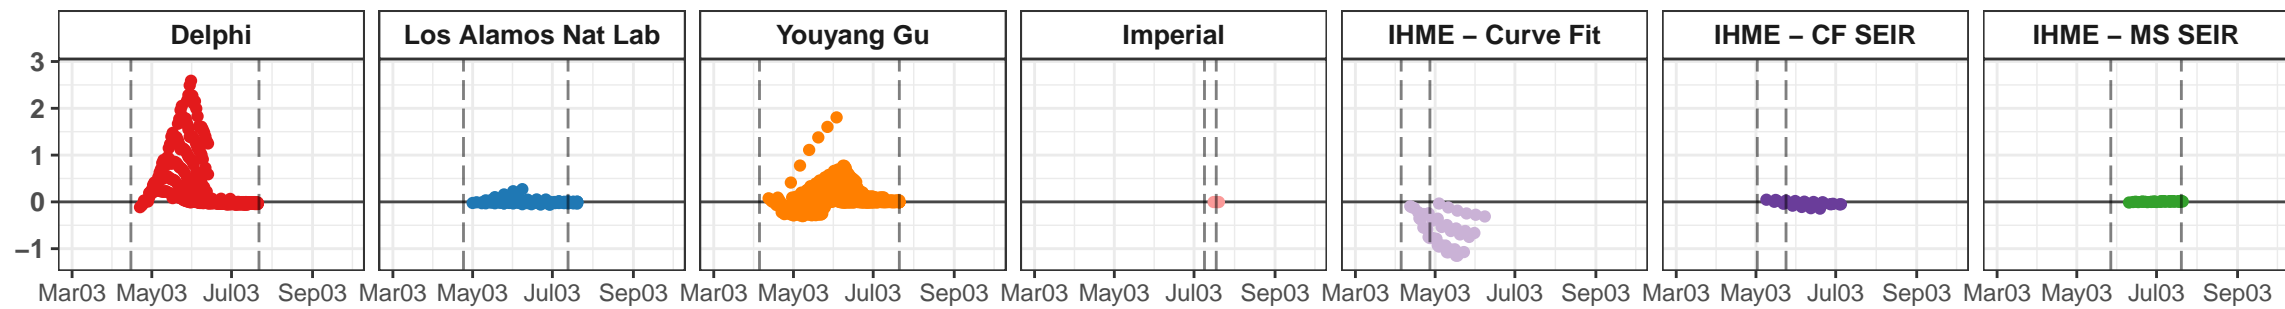

# North Carolina

## Current Forecast

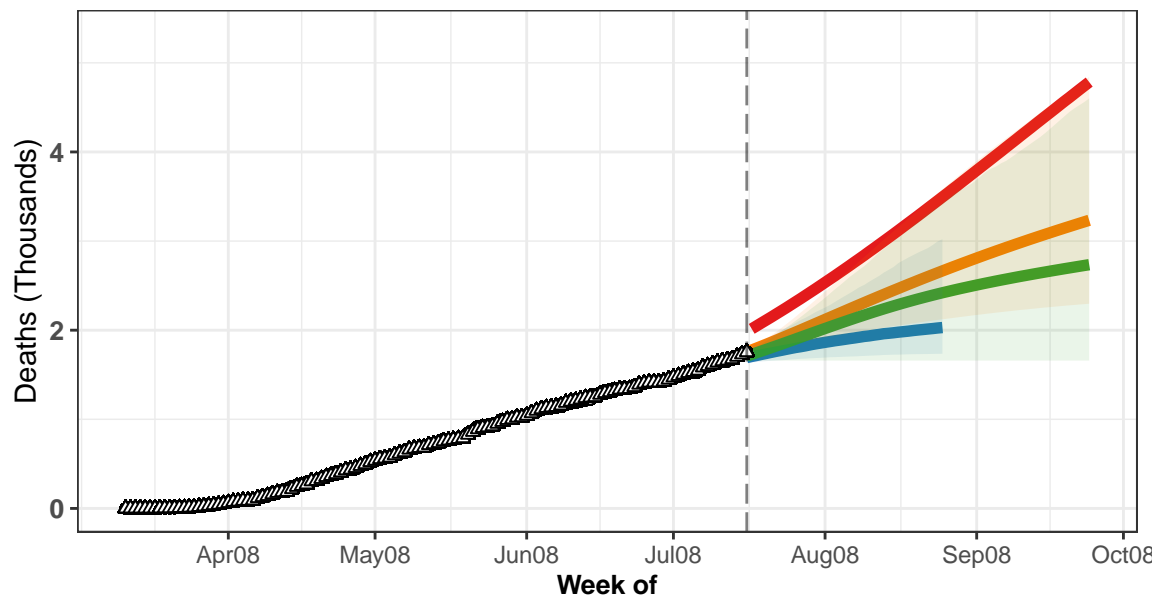

## Cumulative Out-Of-Sample Error (Post Intercept Shift)

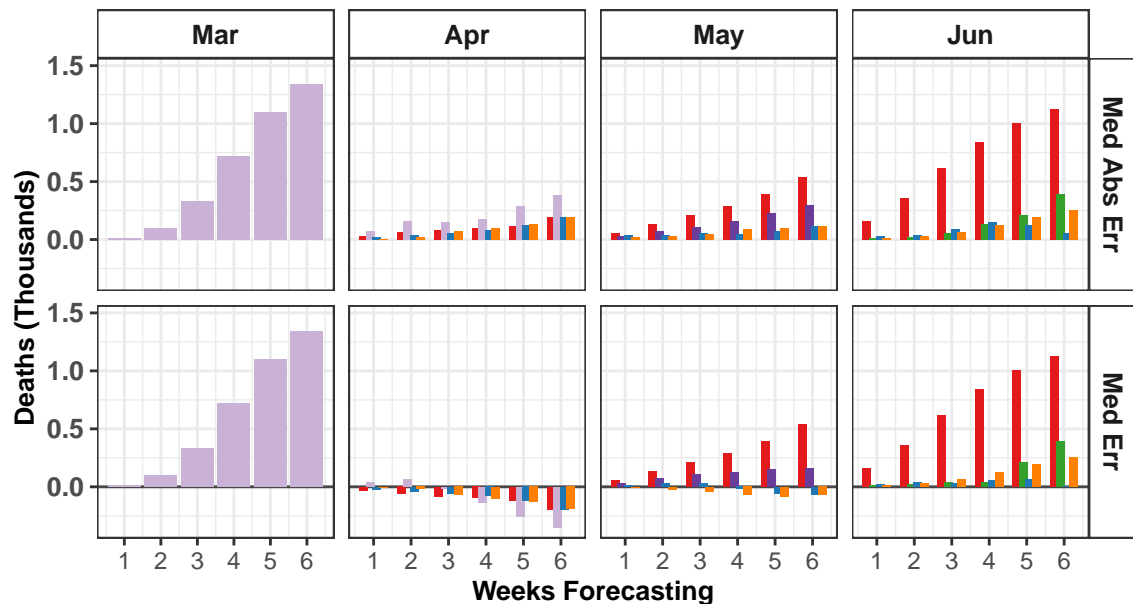

## All Model Versions

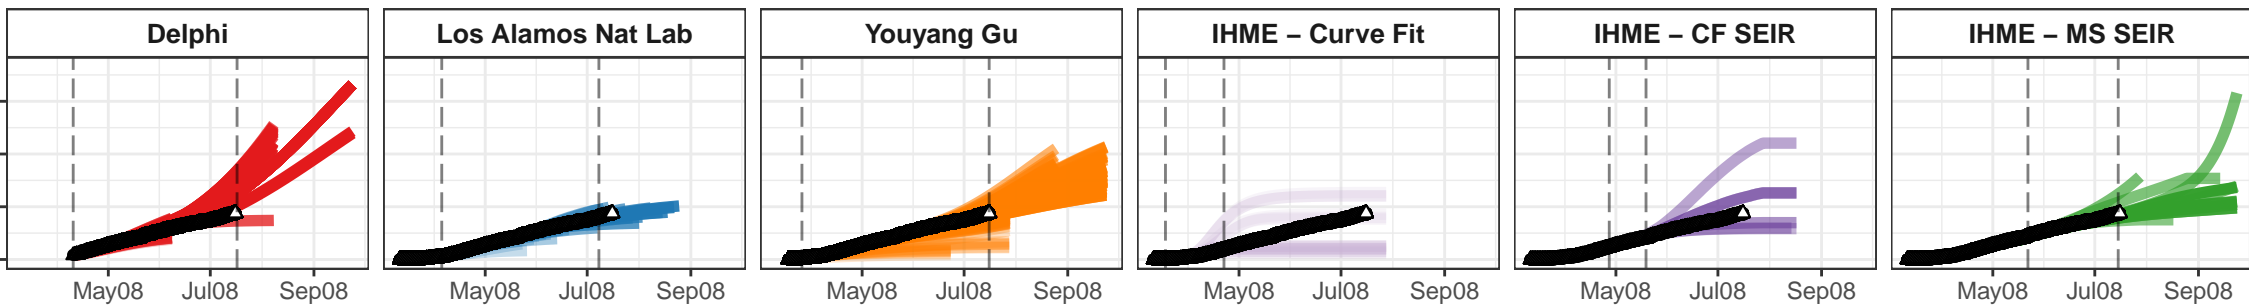

## All Cumulative Errors

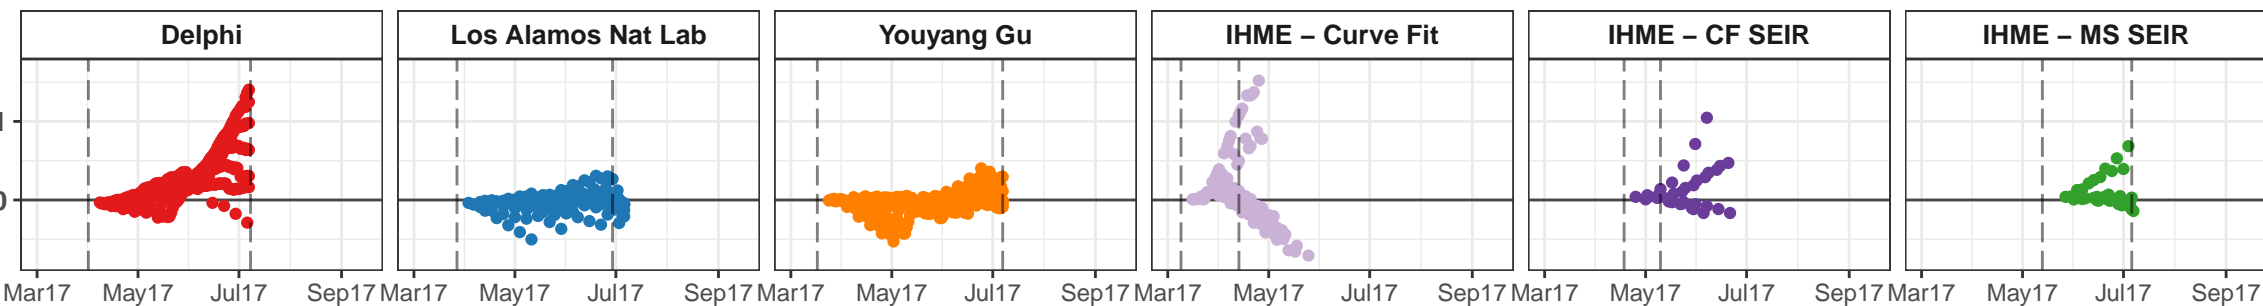

# Portugal

## Current Forecast

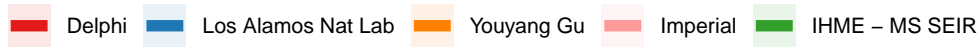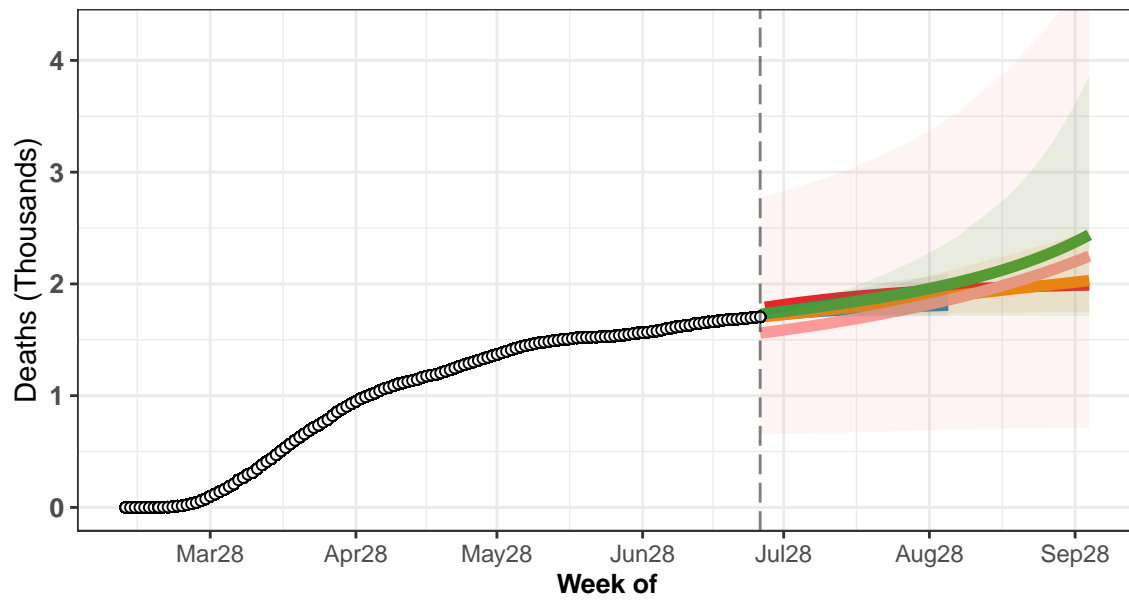

## Cumulative Out-Of-Sample Error (Post Intercept Shift)

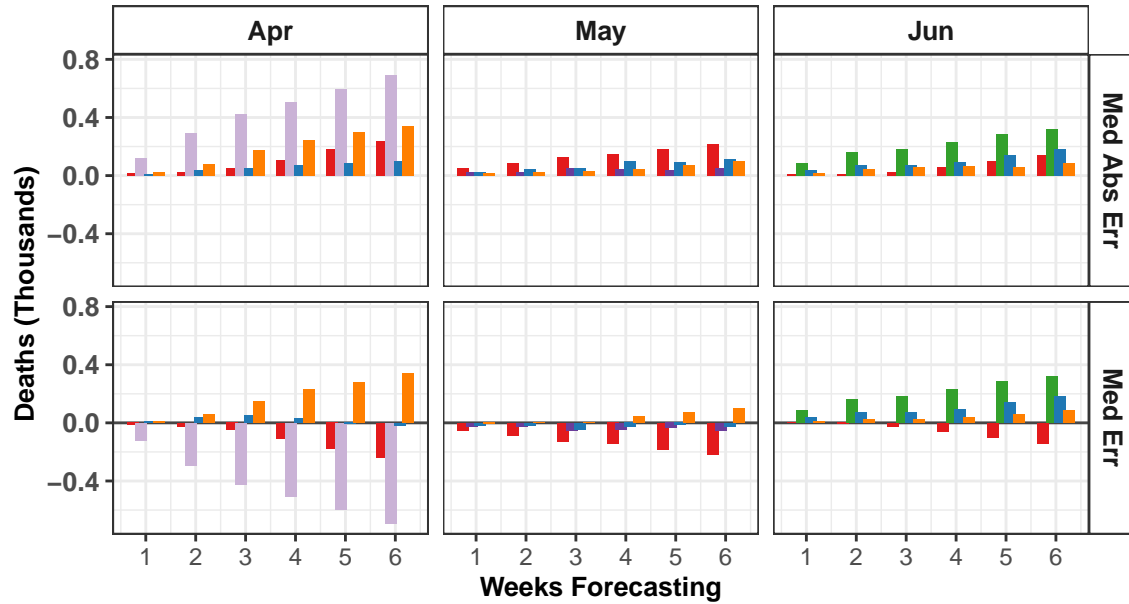

## All Model Versions

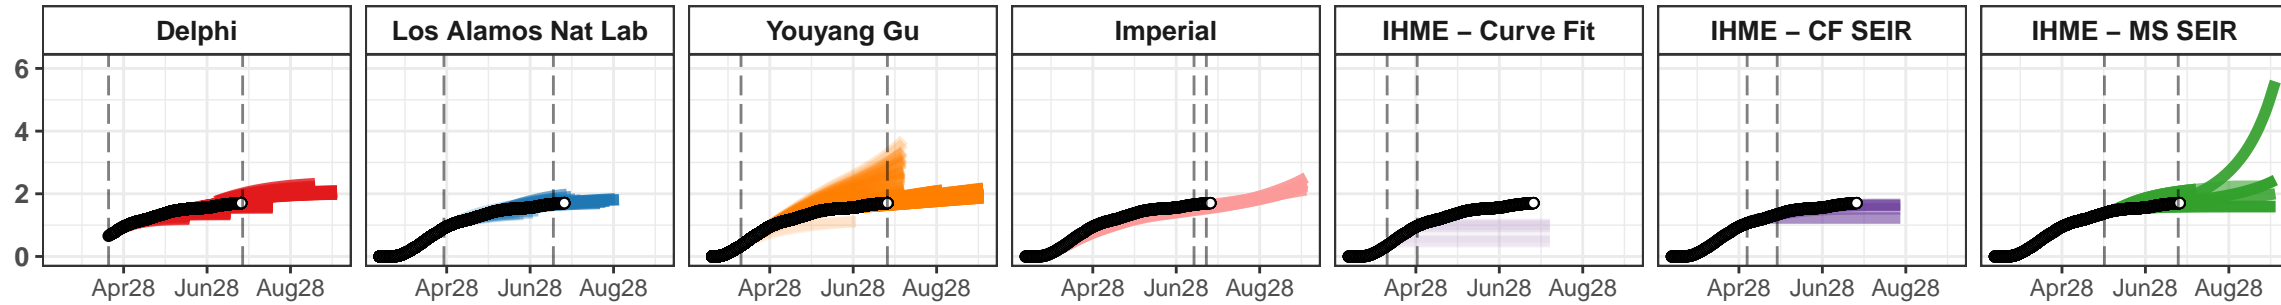

## All Cumulative Errors

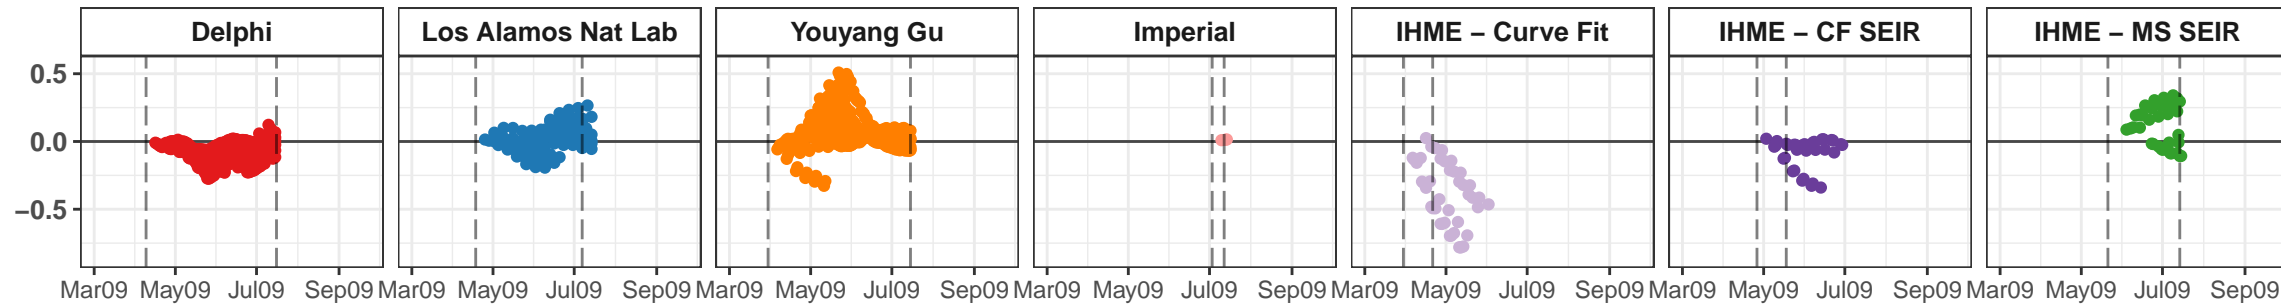



# Poland

## Current Forecast

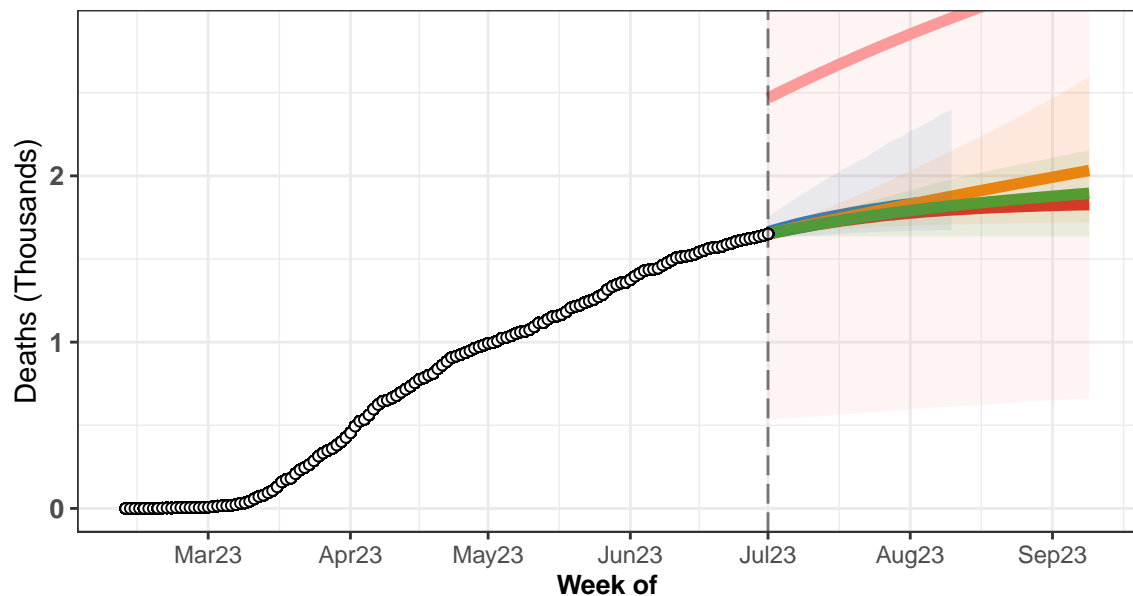

## Cumulative Out-Of-Sample Error (Post Intercept Shift)

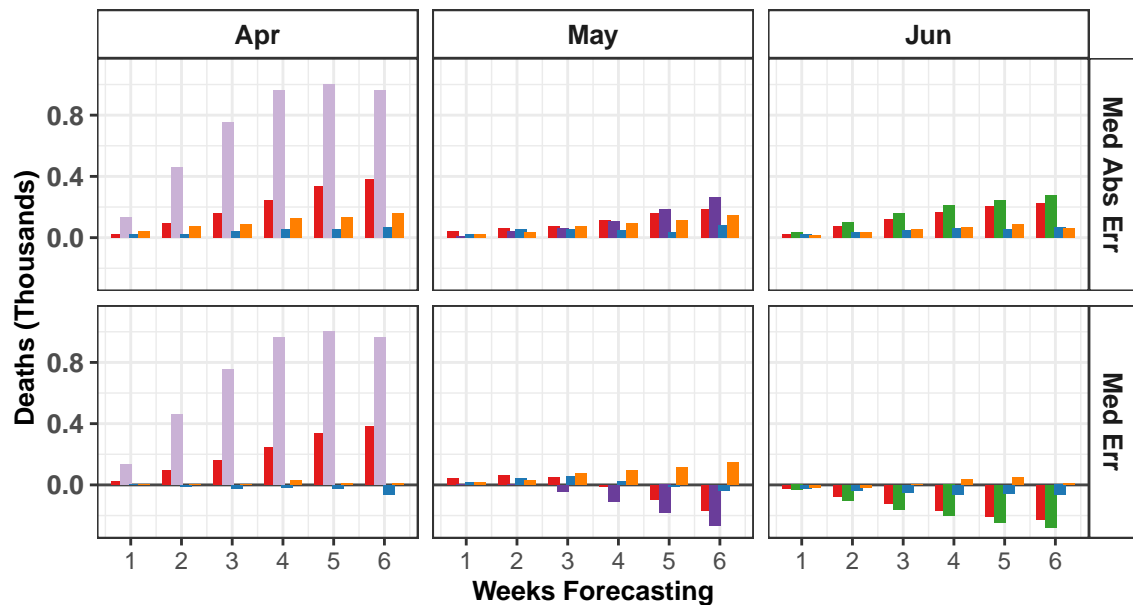

## All Model Versions

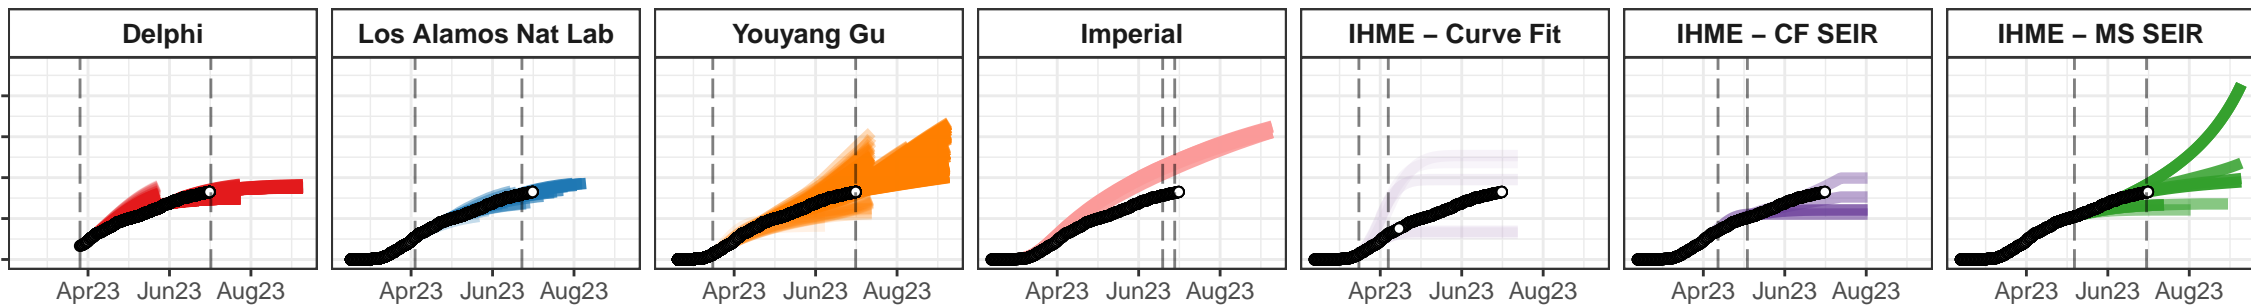

## All Cumulative Errors

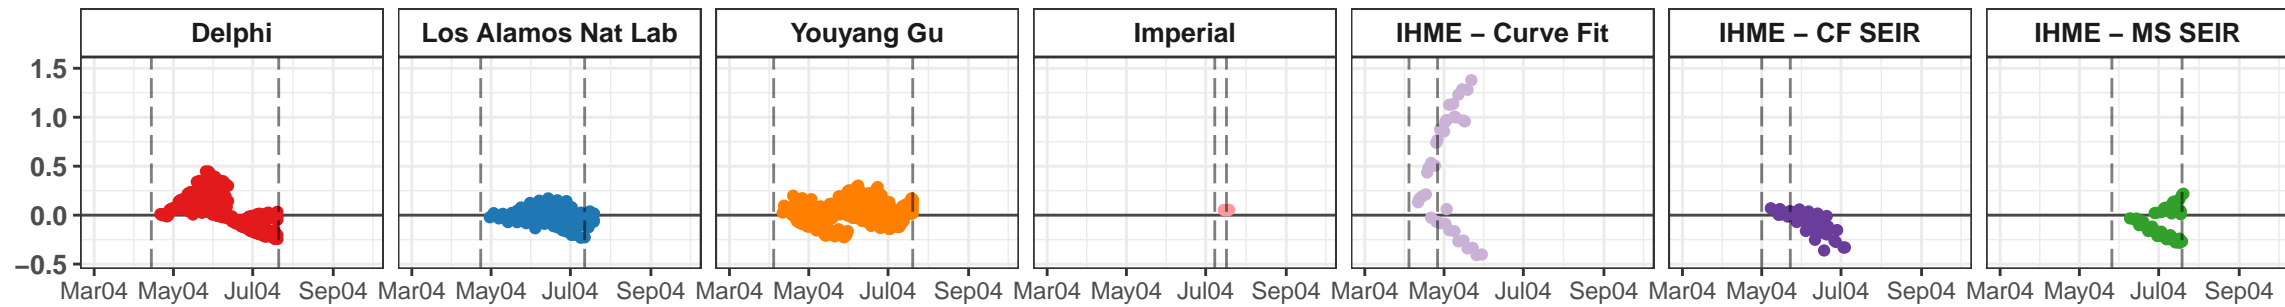

# Guatemala

## Current Forecast

Delphi Los Alamos Nat Lab Imperial IHME – MS SEIR

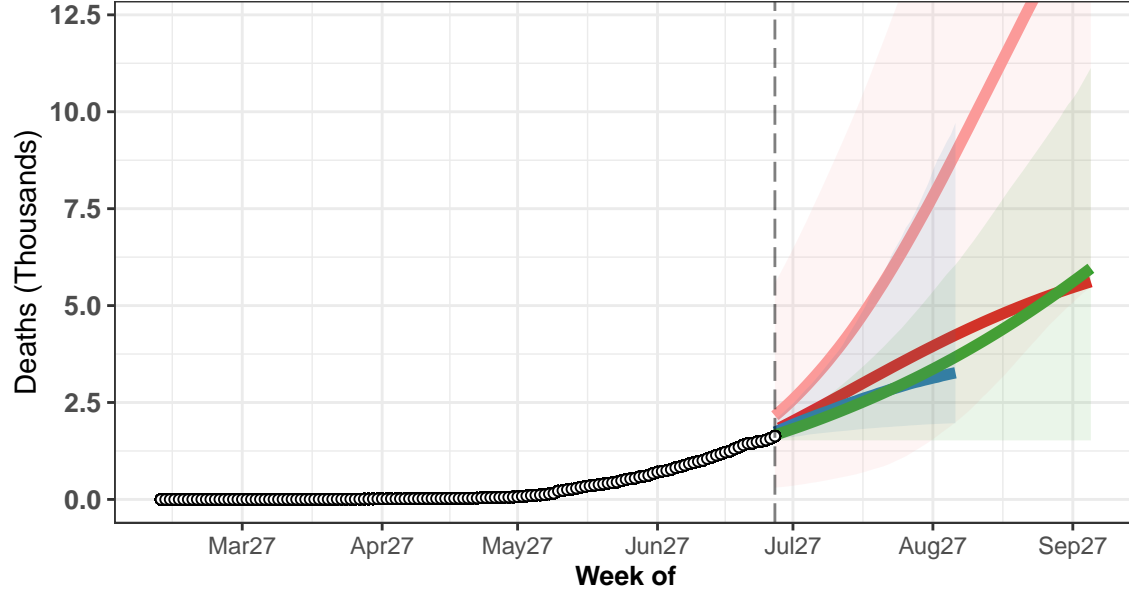

## Cumulative Out-Of-Sample Error (Post Intercept Shift)

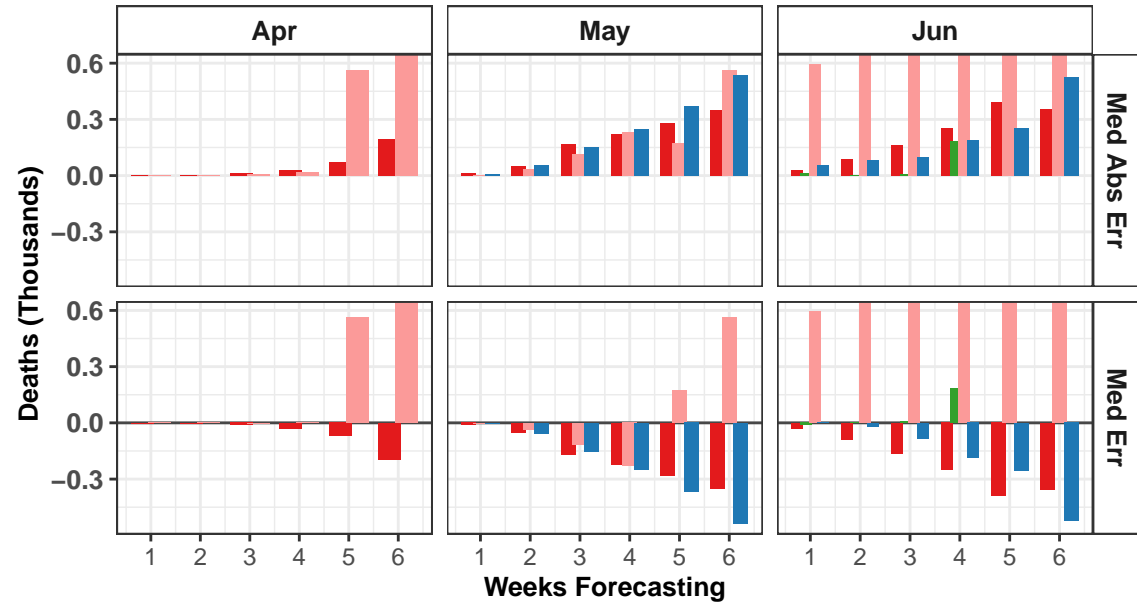

## All Model Versions

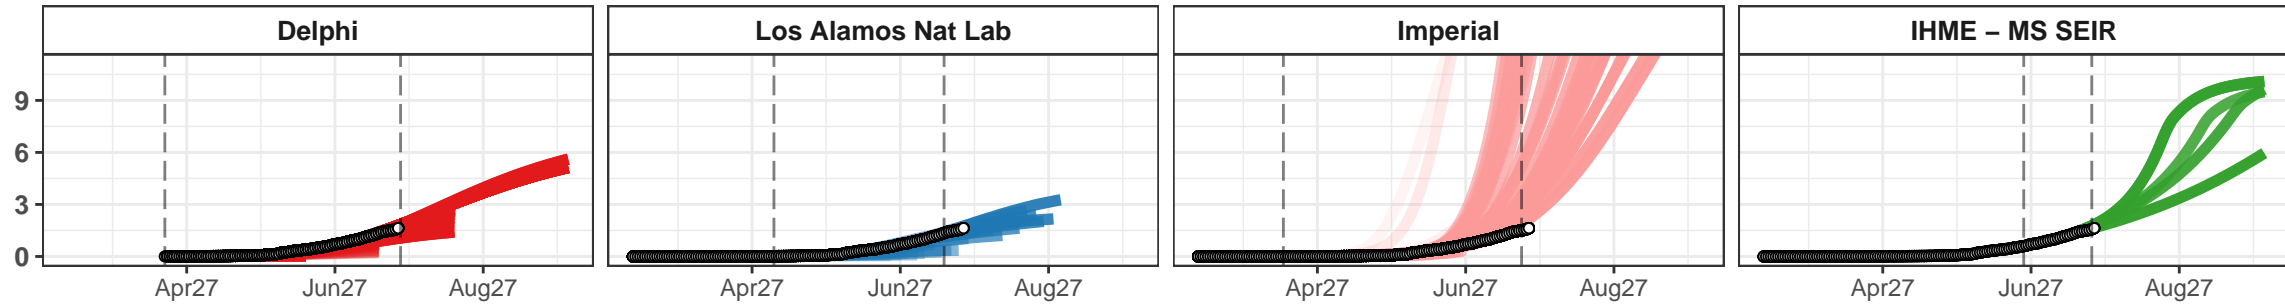

## All Cumulative Errors

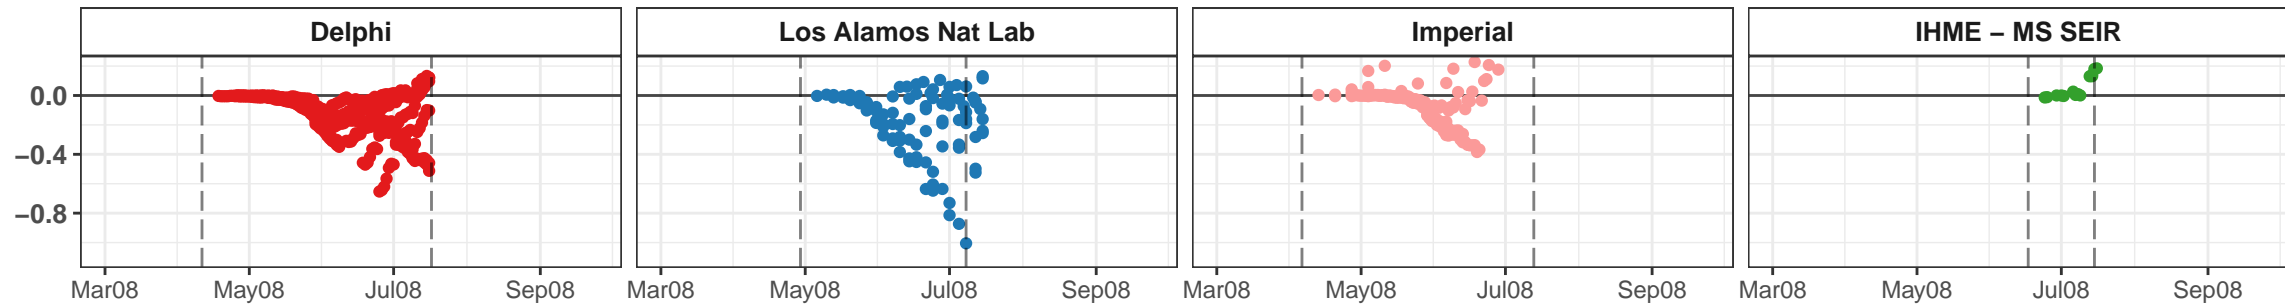

# Minnesota

## Current Forecast

Delphi Los Alamos Nat Lab Youyang Gu IHME – MS SEIR ○ JHU △ NYT

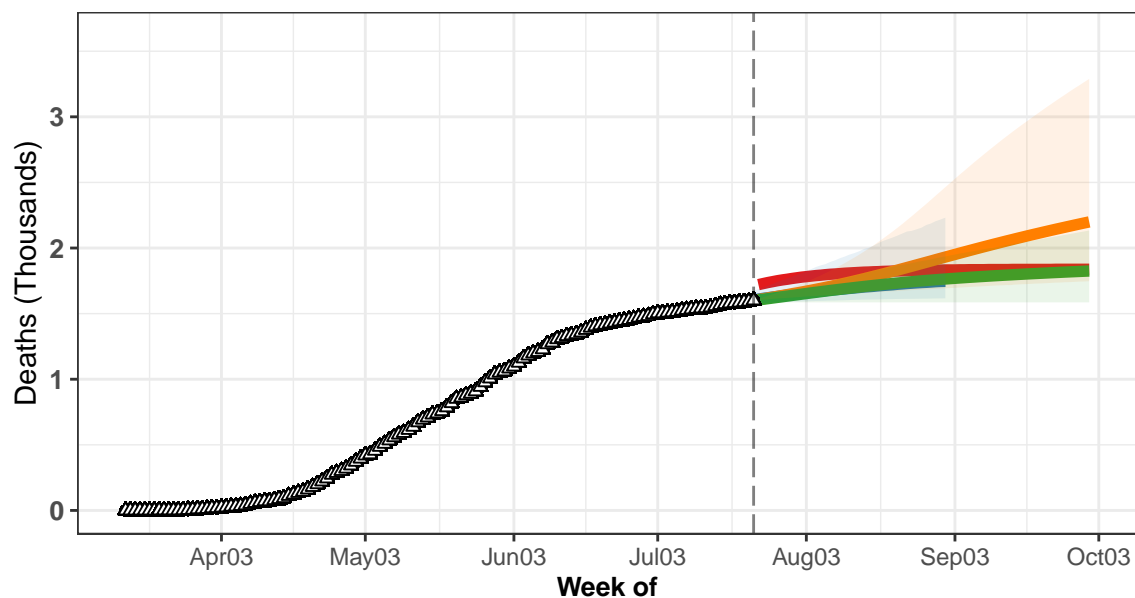

## Cumulative Out-Of-Sample Error (Post Intercept Shift)

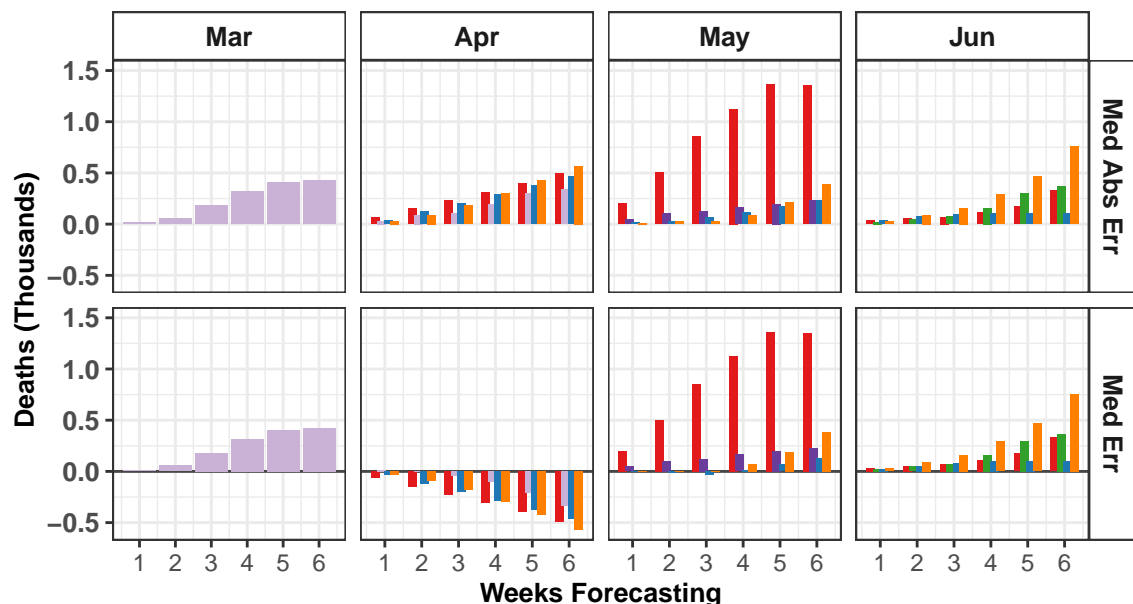

## All Model Versions

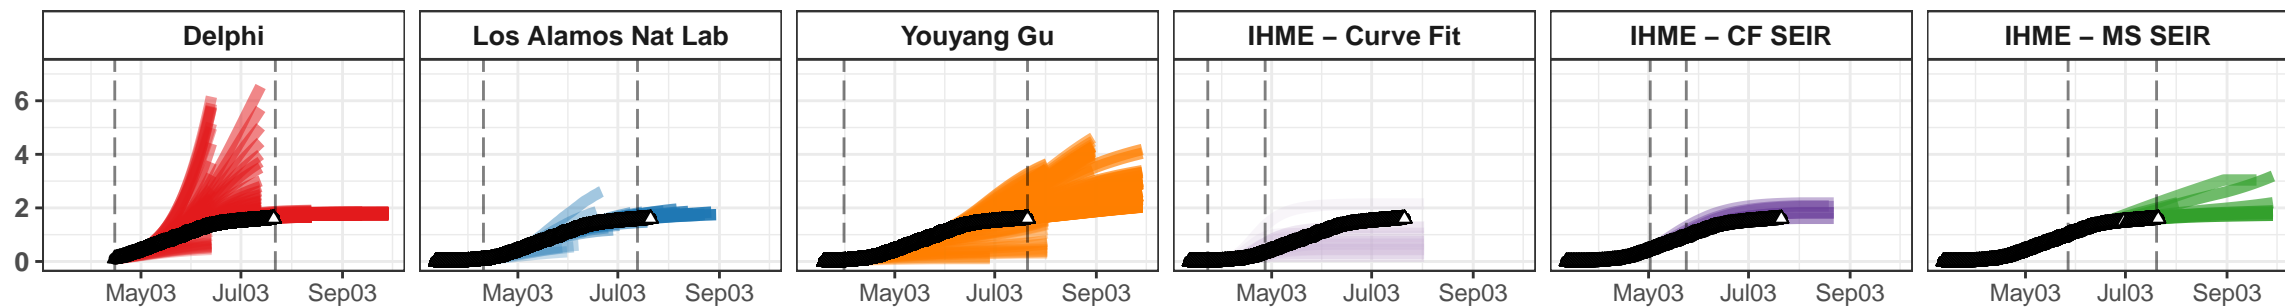

## All Cumulative Errors

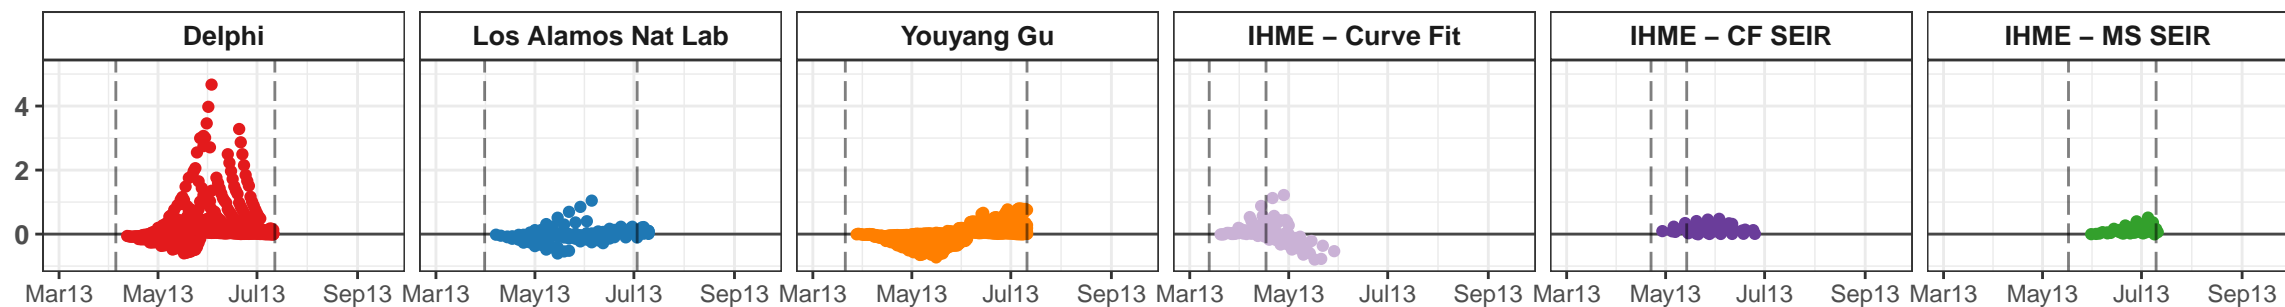

# Ukraine

## Current Forecast

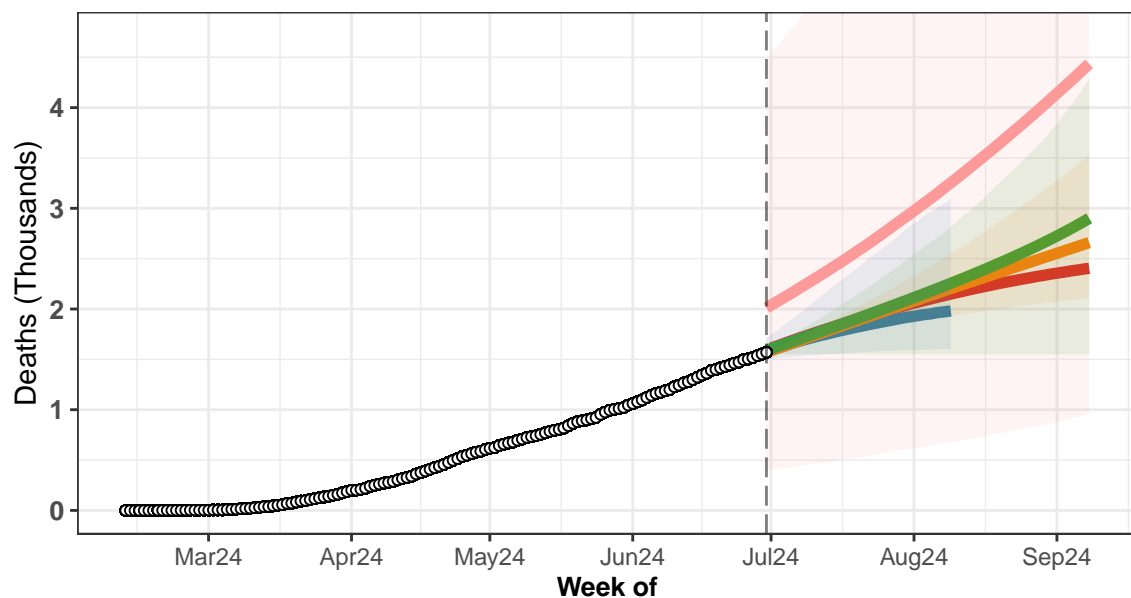

## Cumulative Out-Of-Sample Error (Post Intercept Shift)

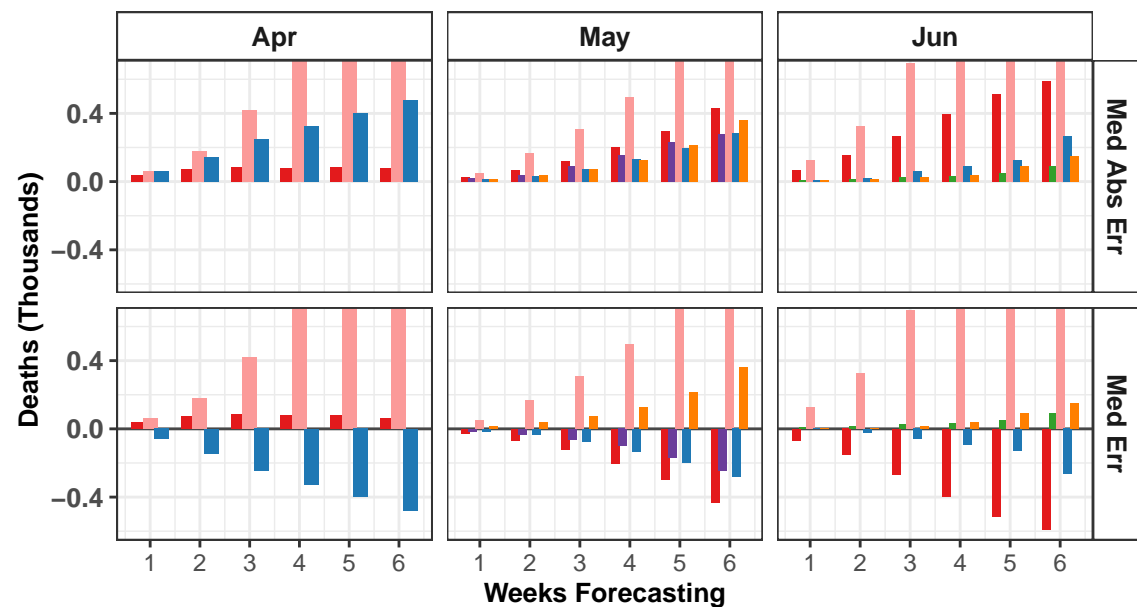

## All Model Versions

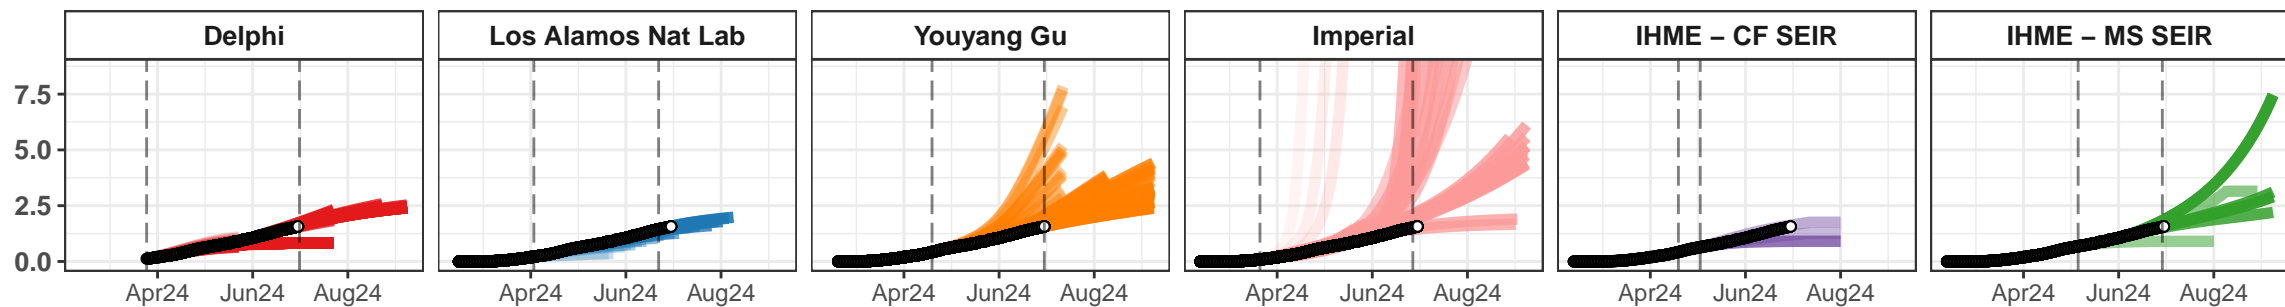

## All Cumulative Errors

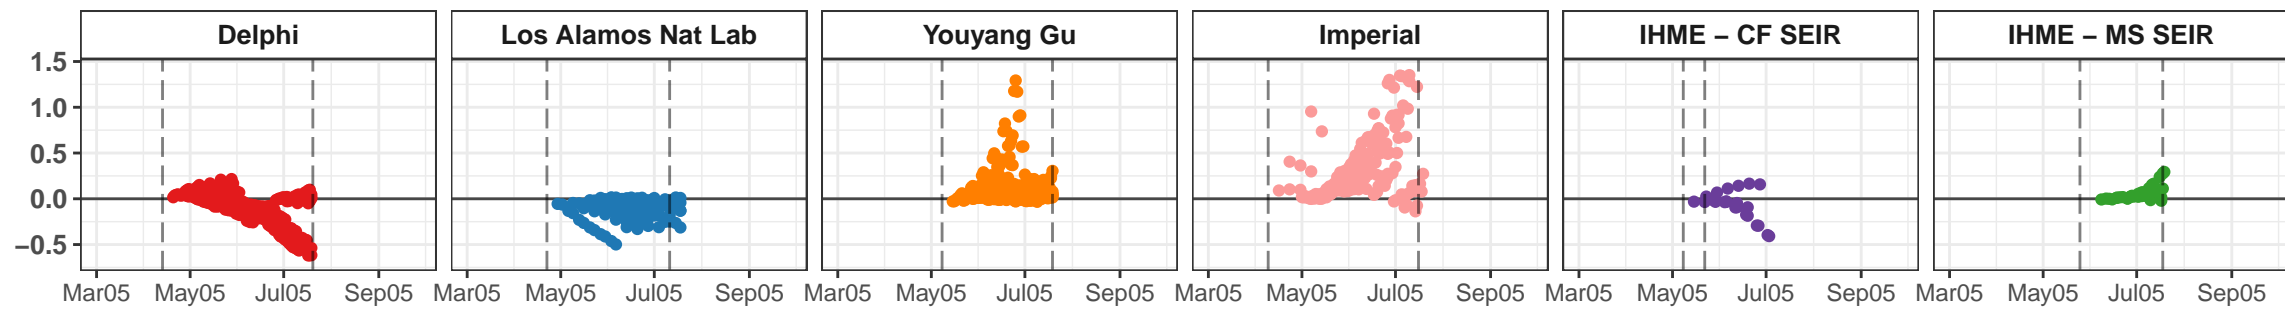

# Washington

## Current Forecast

Delphi Los Alamos Nat Lab Youyang Gu IHME – MS SEIR ○ JHU △ NYT

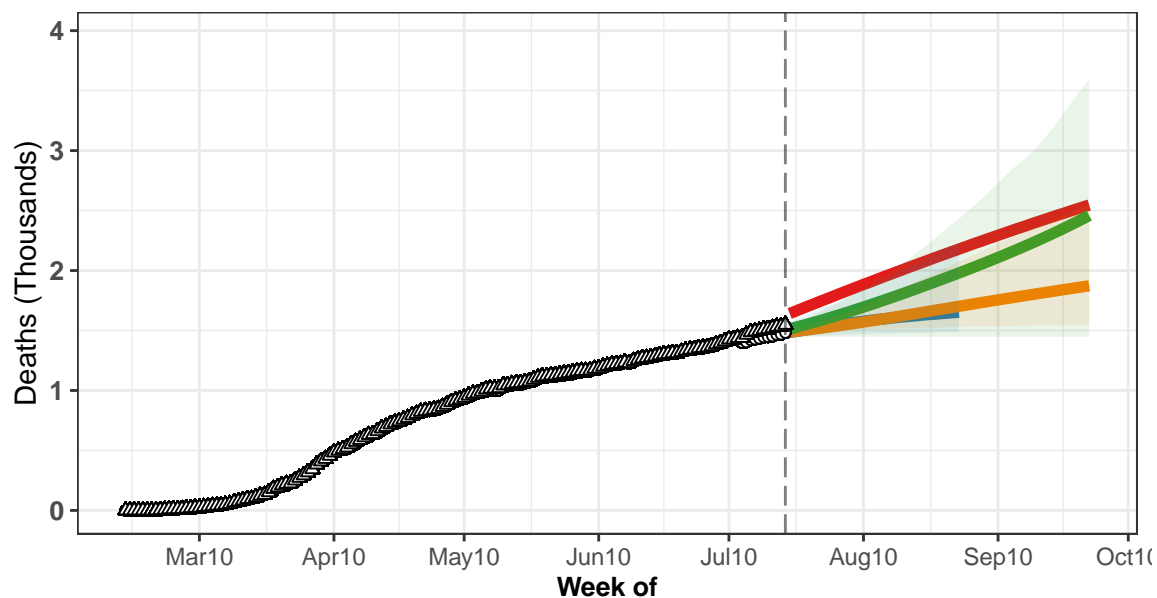

## Cumulative Out-Of-Sample Error (Post Intercept Shift)

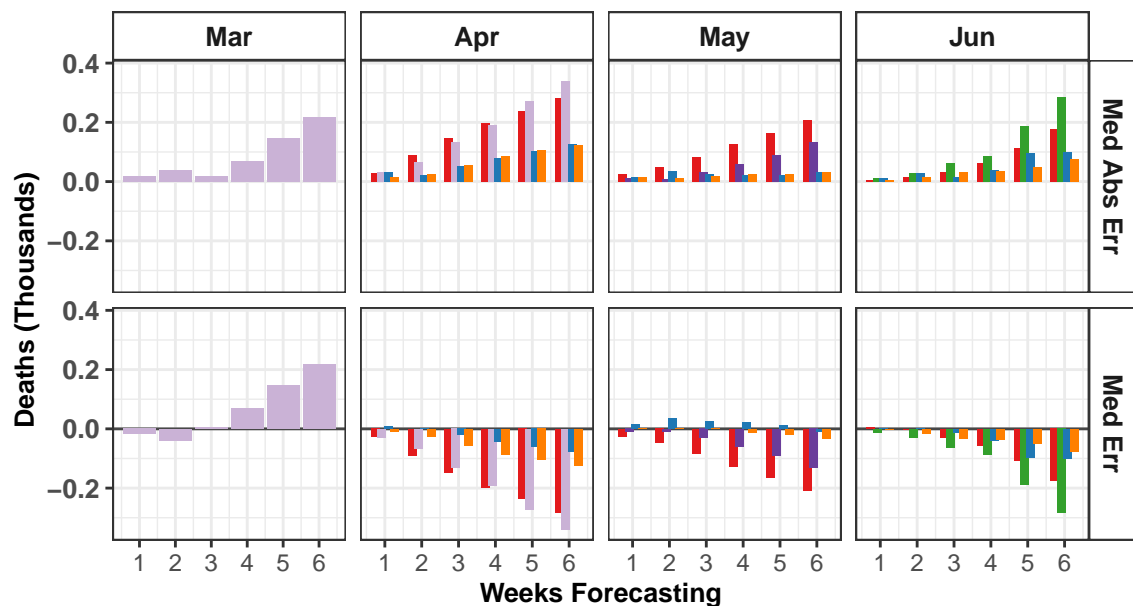

## All Model Versions

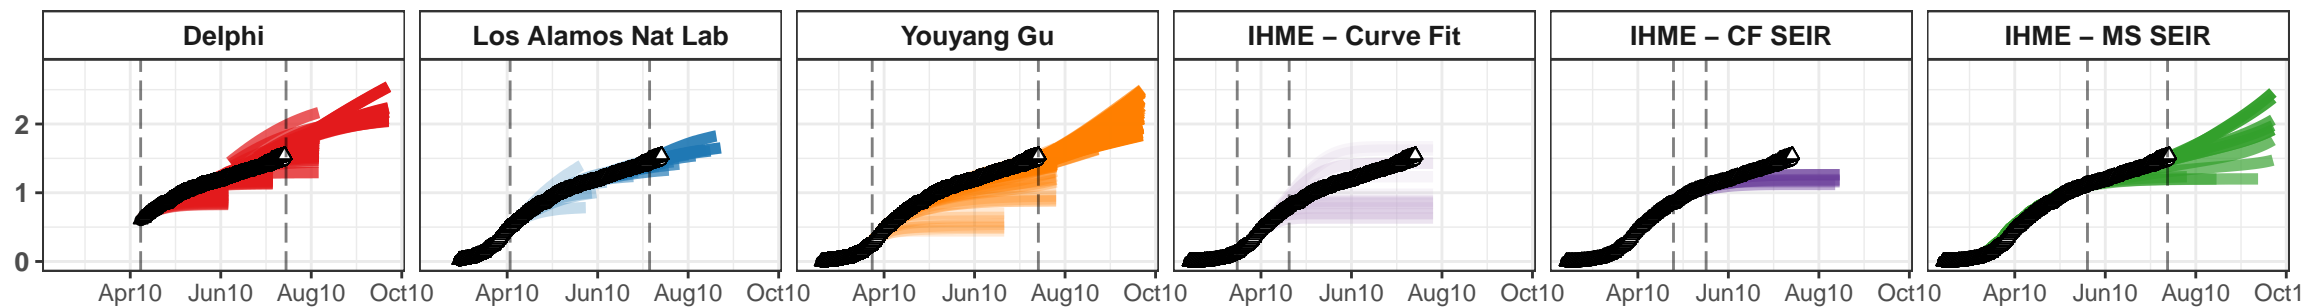

## All Cumulative Errors

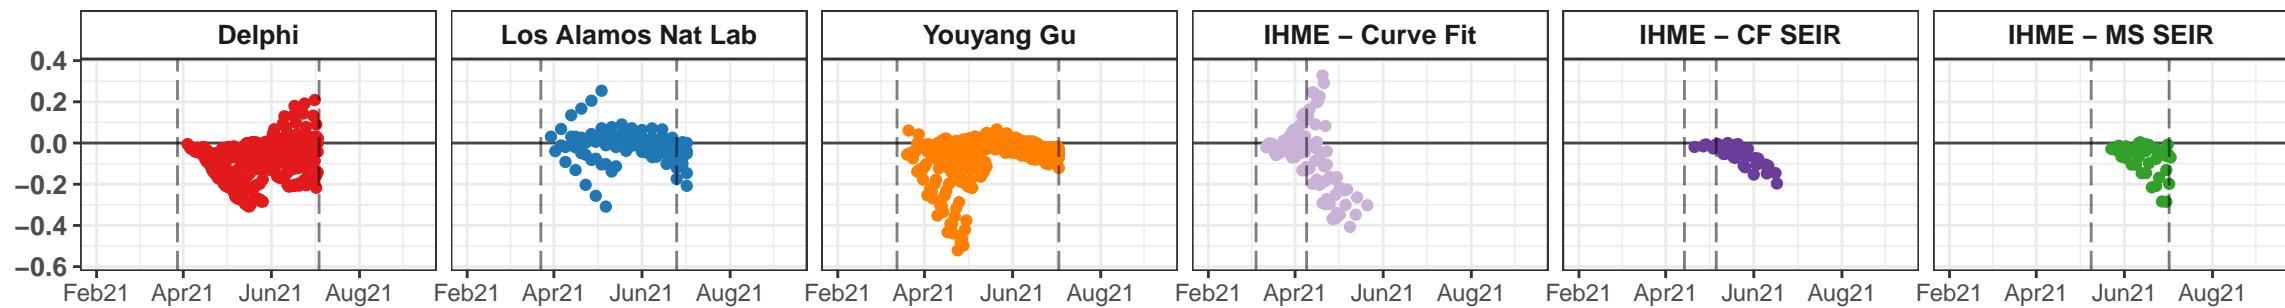

# Mississippi

## Current Forecast

Delphi Los Alamos Nat Lab Youyang Gu IHME – MS SEIR ○ JHU △ NYT

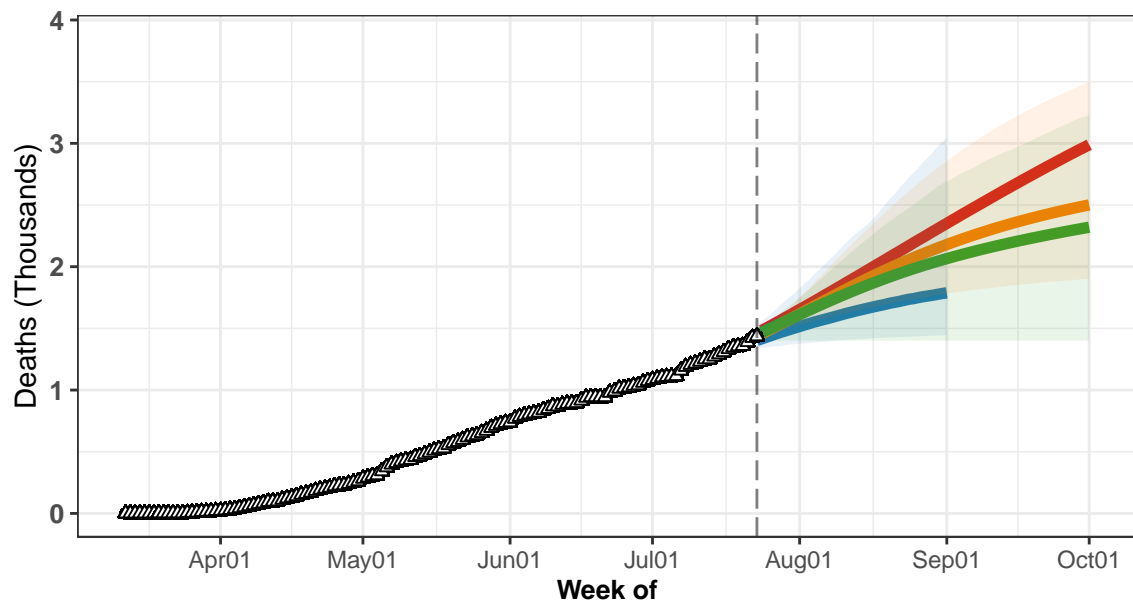

## Cumulative Out-Of-Sample Error (Post Intercept Shift)

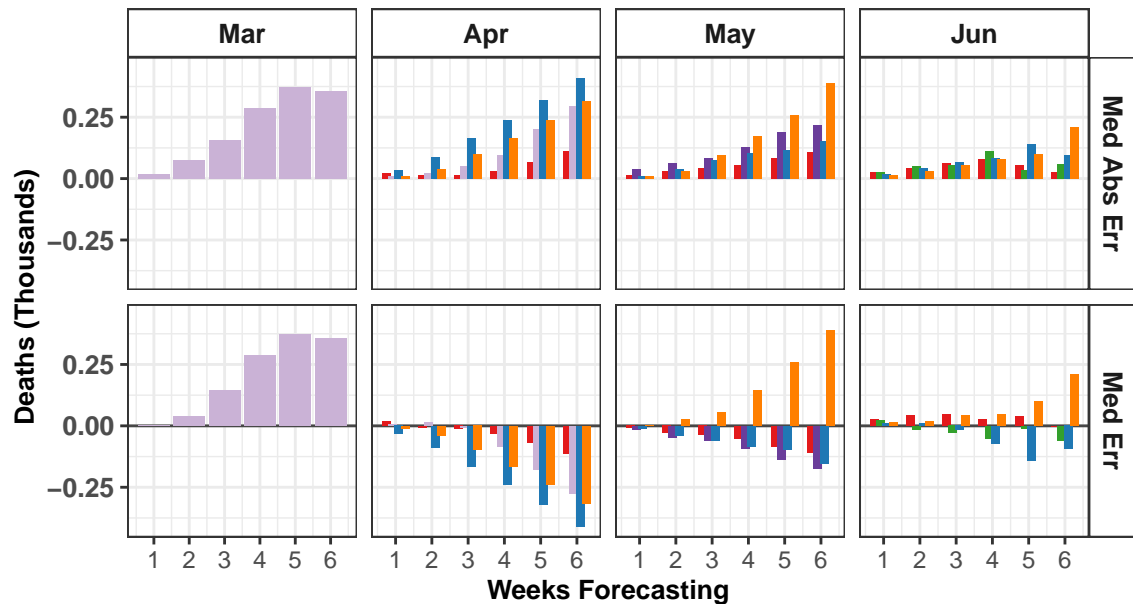

## All Model Versions

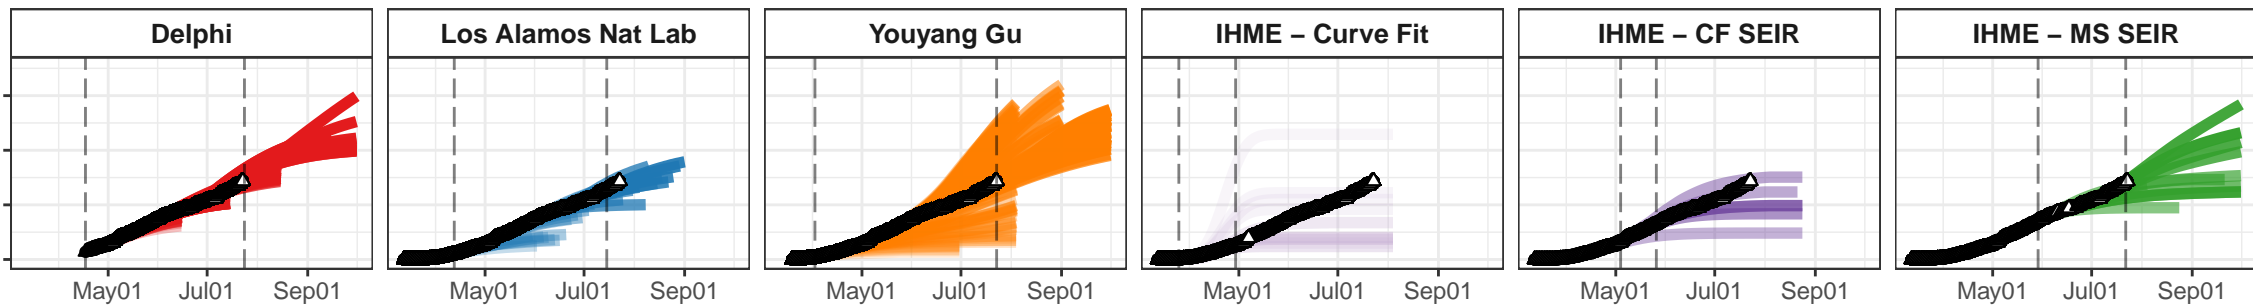

## All Cumulative Errors

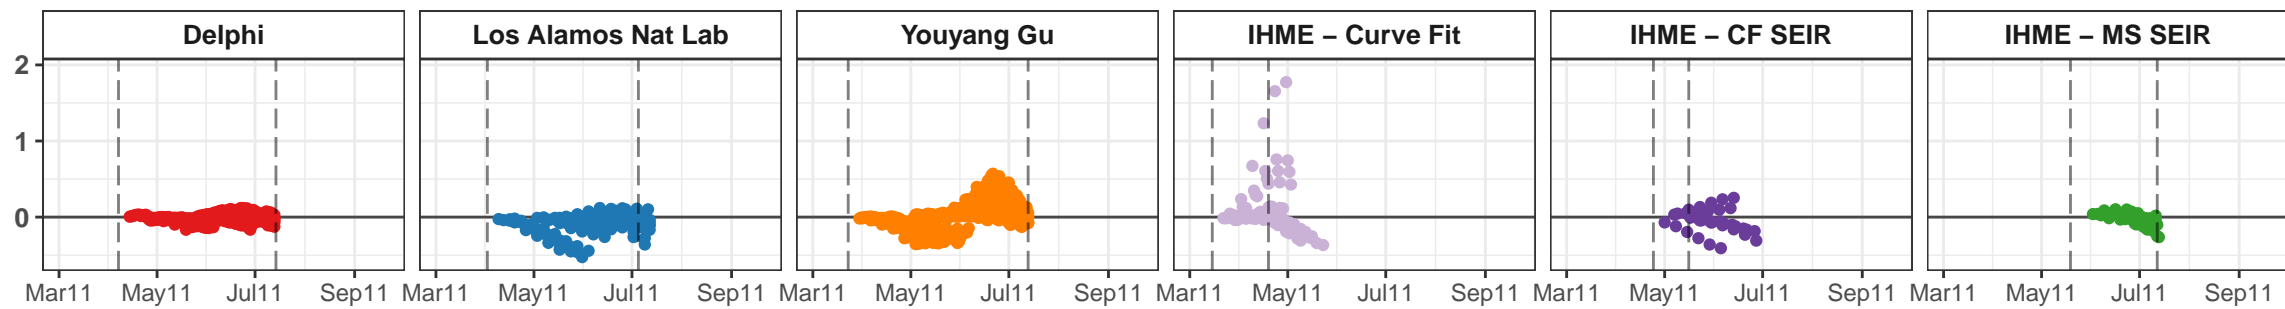

# Alabama

## Current Forecast

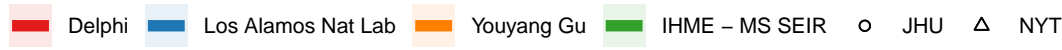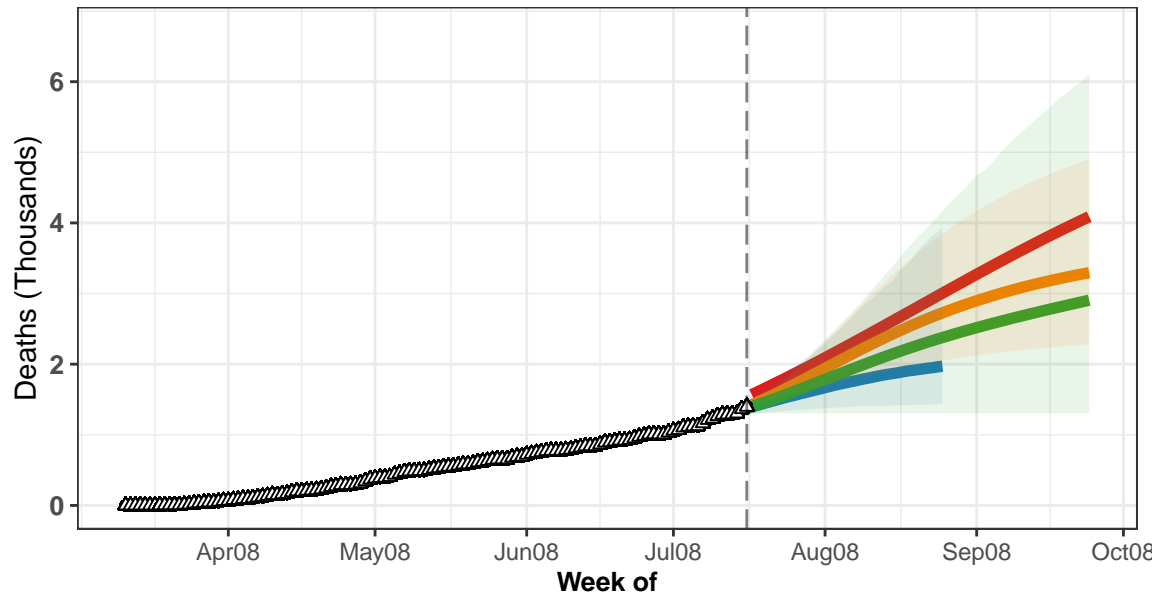

## Cumulative Out-Of-Sample Error (Post Intercept Shift)

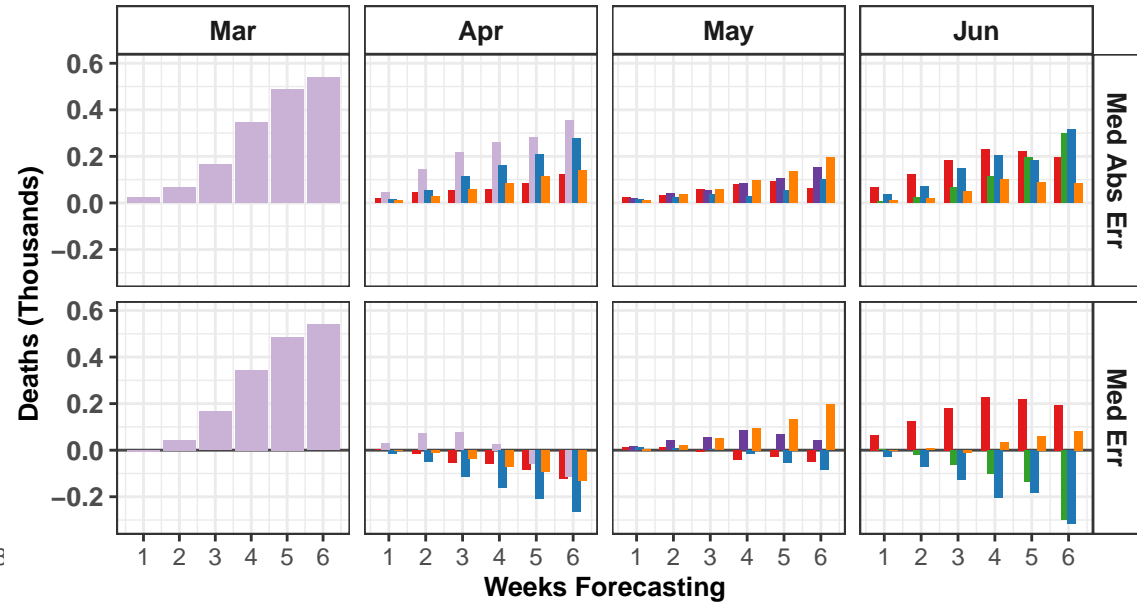

## All Model Versions

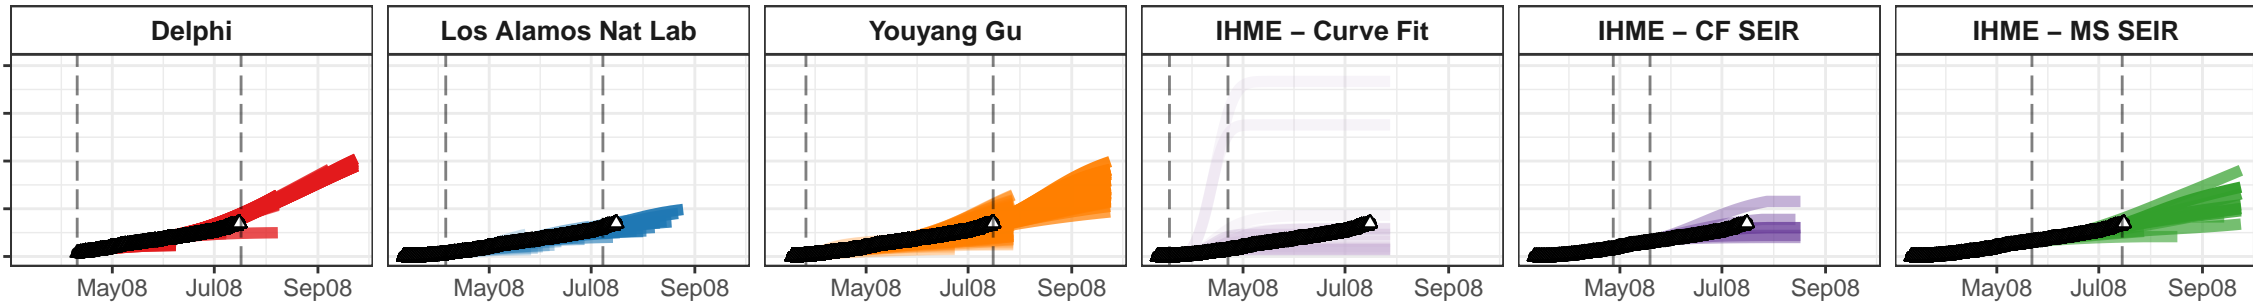

## All Cumulative Errors

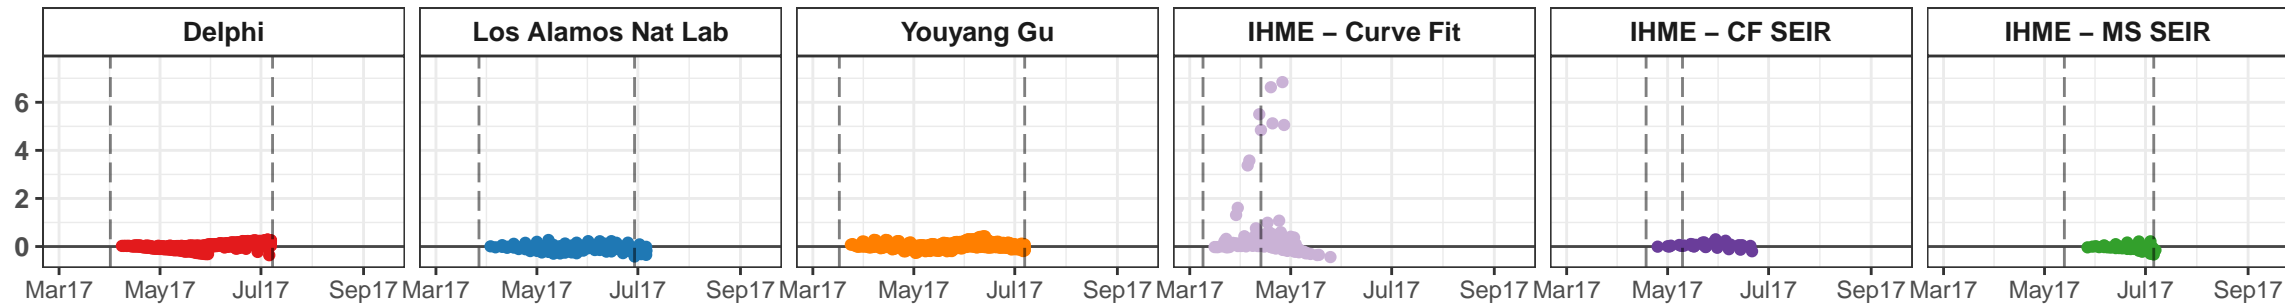

# South Carolina

## Current Forecast

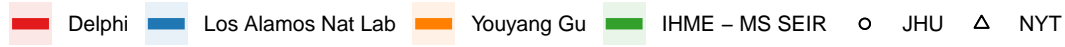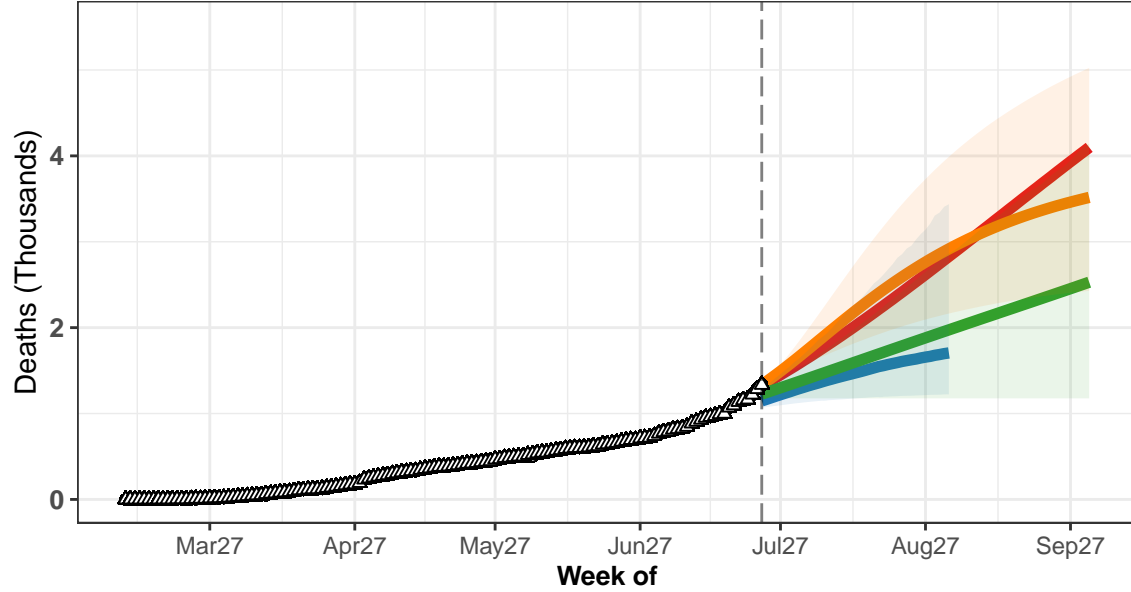

## Cumulative Out-Of-Sample Error (Post Intercept Shift)

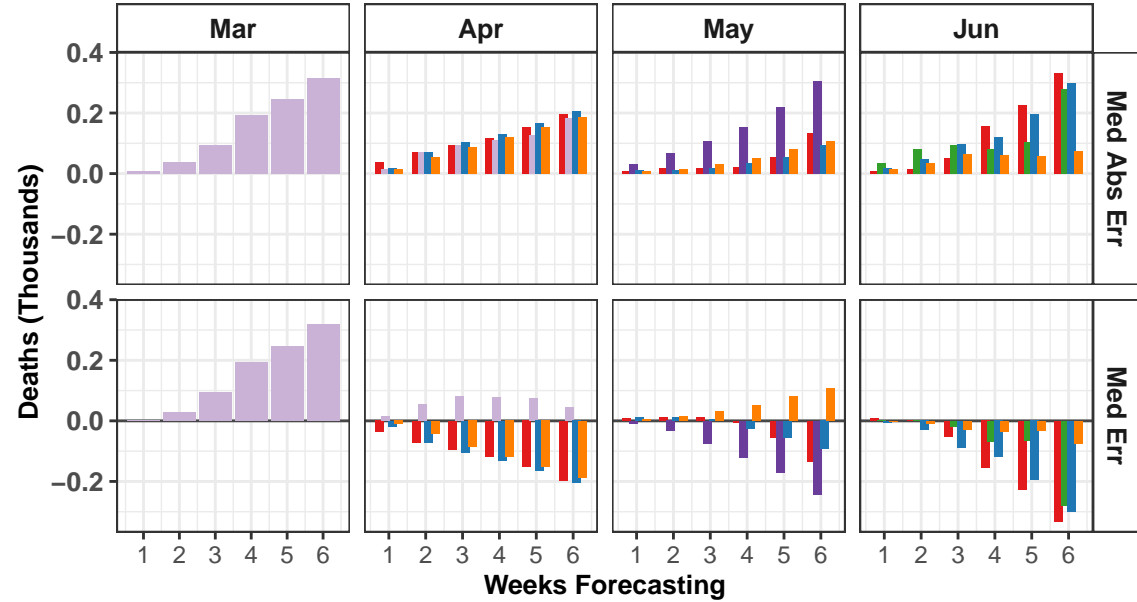

## All Model Versions

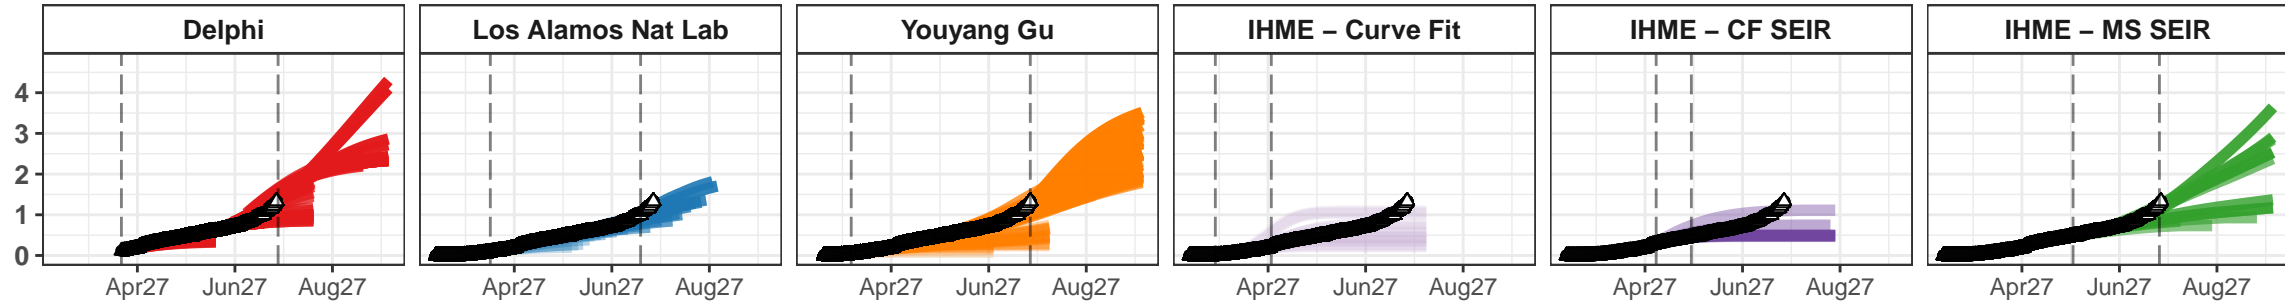

## All Cumulative Errors

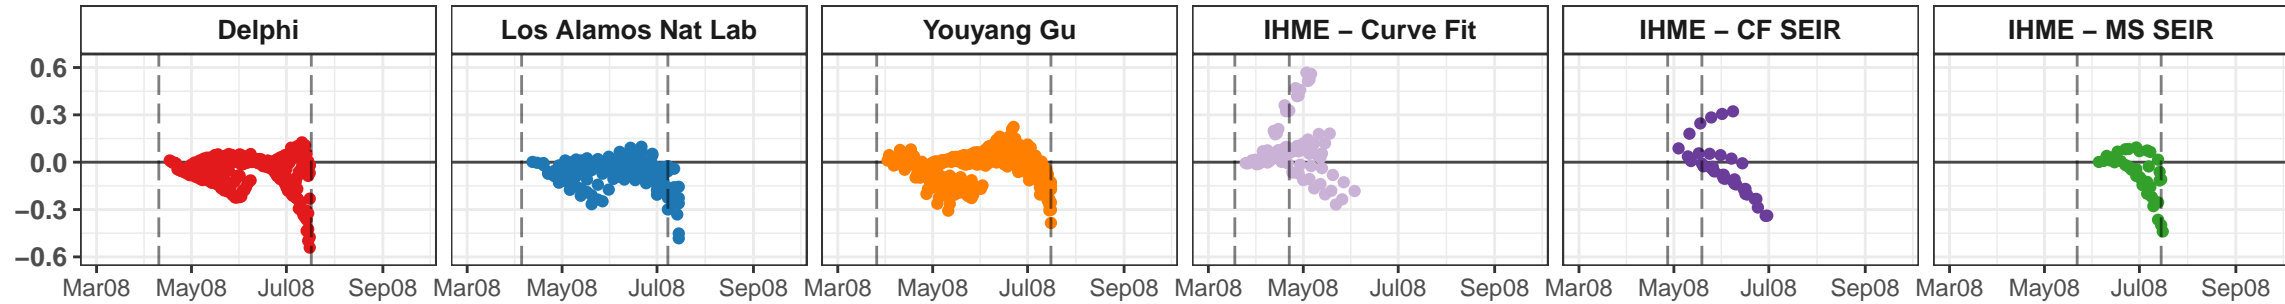



# Missouri

## Current Forecast

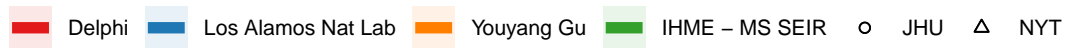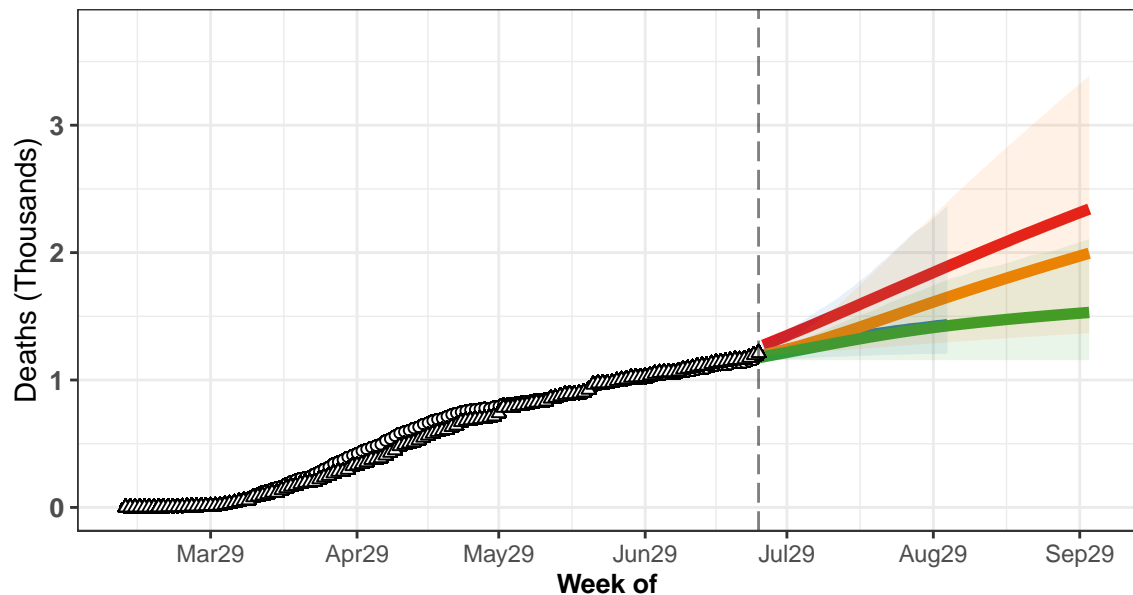

## Cumulative Out-Of-Sample Error (Post Intercept Shift)

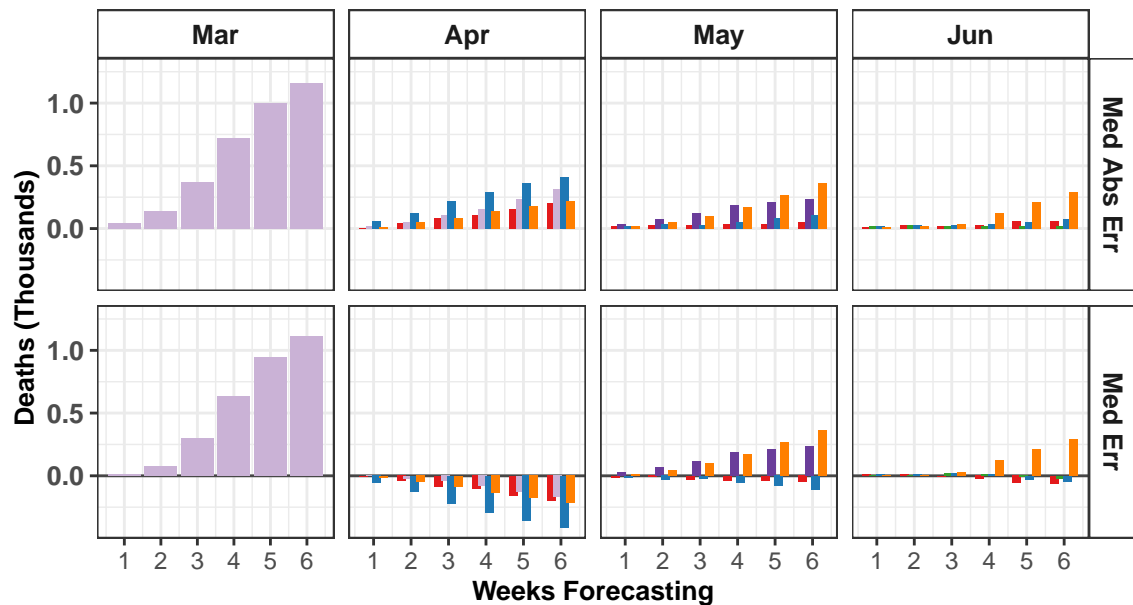

## All Model Versions

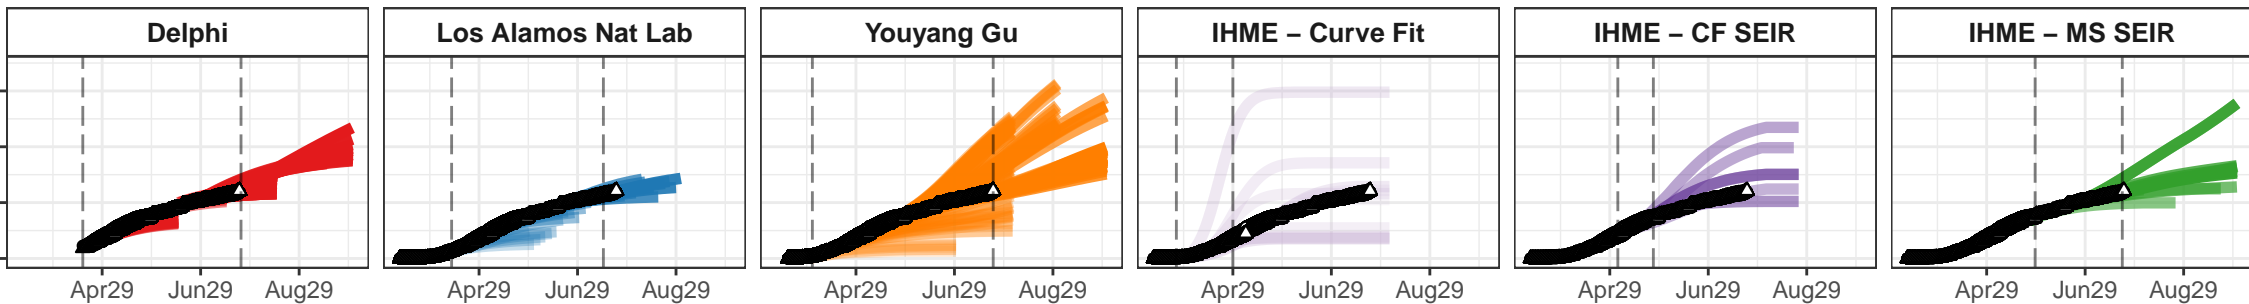

## All Cumulative Errors

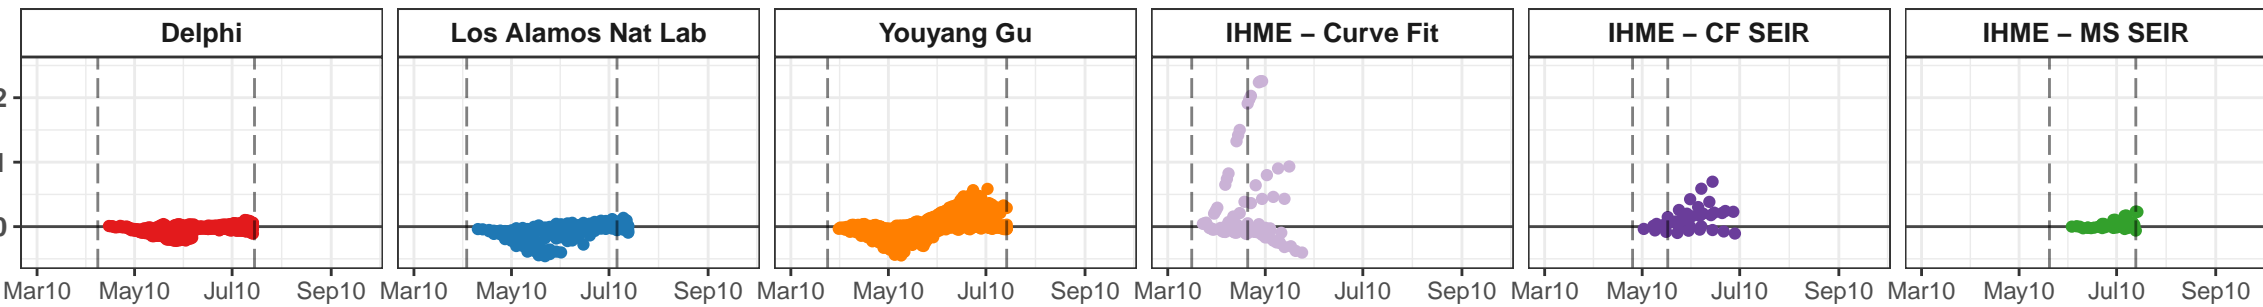

# Afghanistan

## Current Forecast

Delphi Los Alamos Nat Lab Imperial IHME – MS SEIR

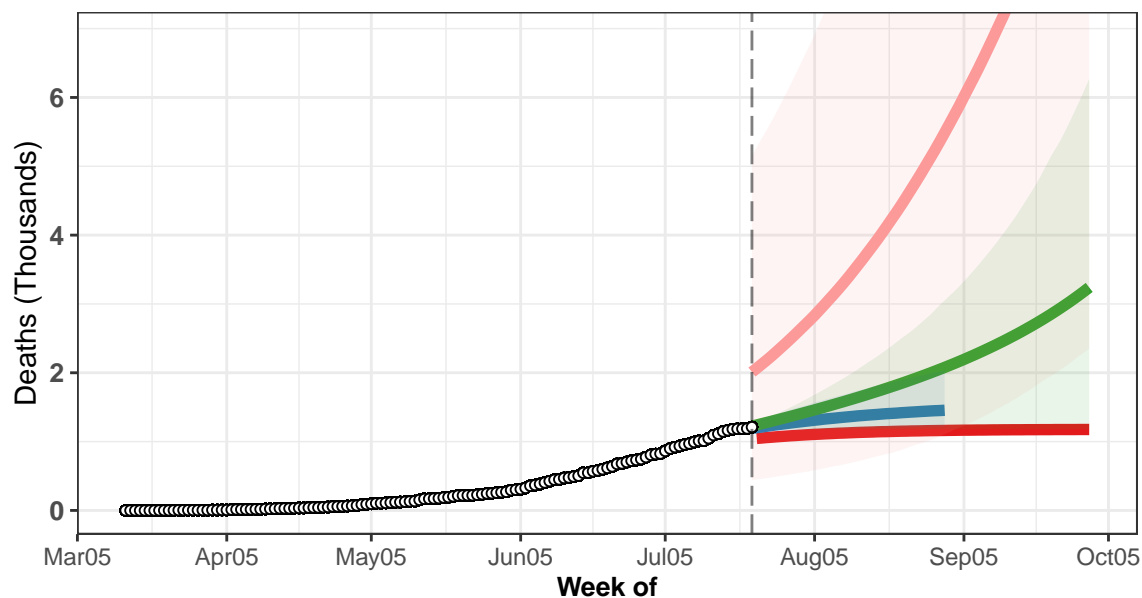

## Cumulative Out-Of-Sample Error (Post Intercept Shift)

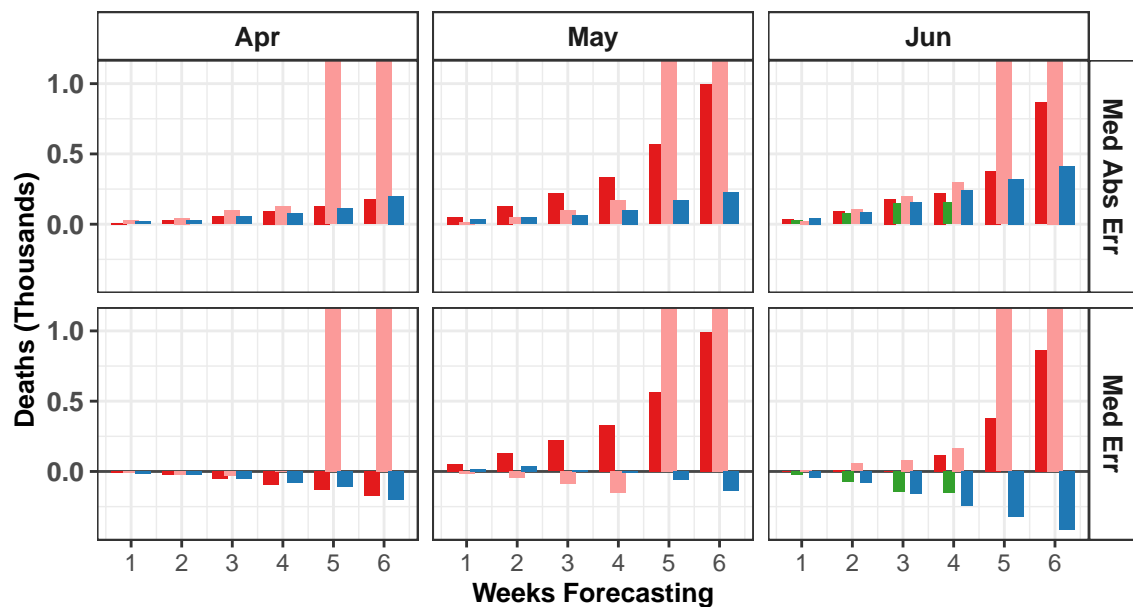

## All Model Versions

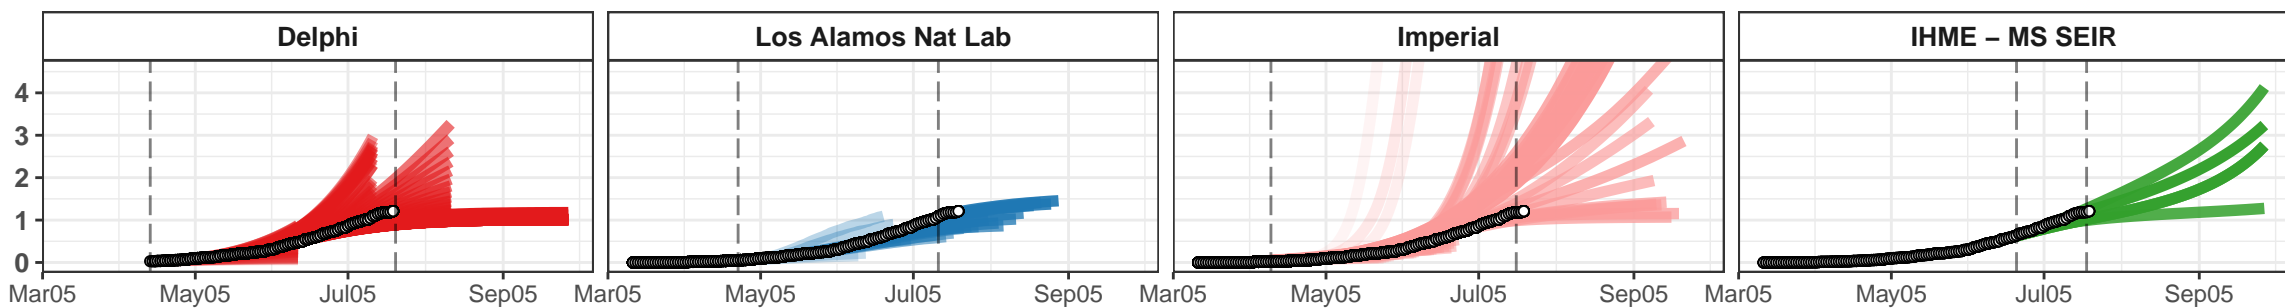

## All Cumulative Errors

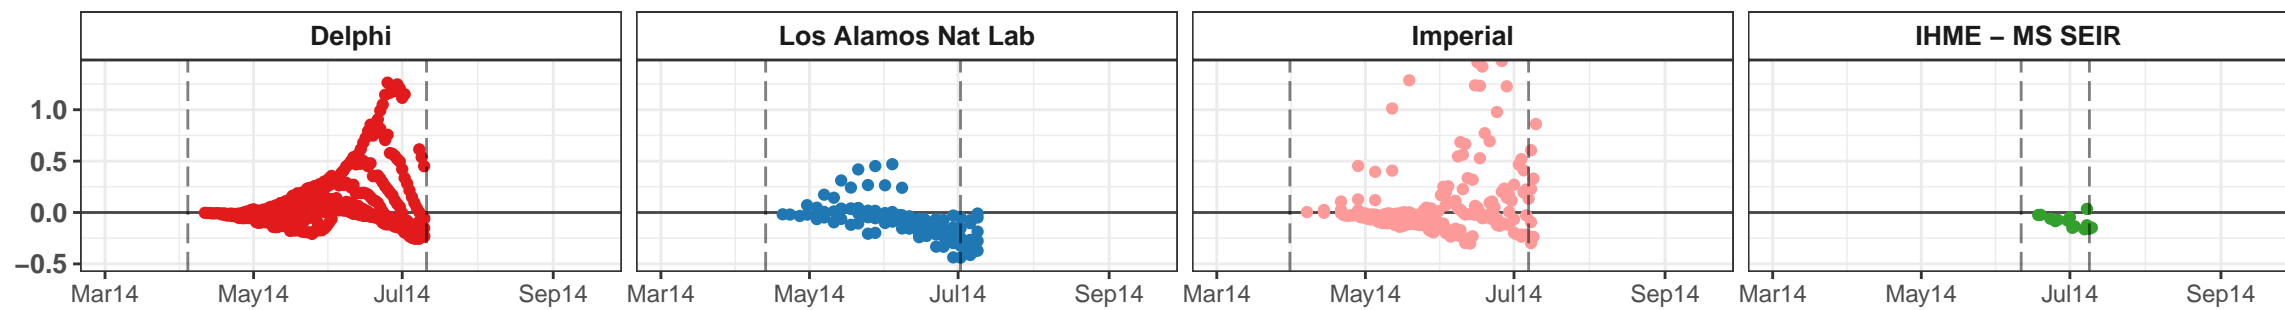

# Kyrgyzstan

## Current Forecast

Los Alamos Nat Lab Imperial IHME – MS SEIR

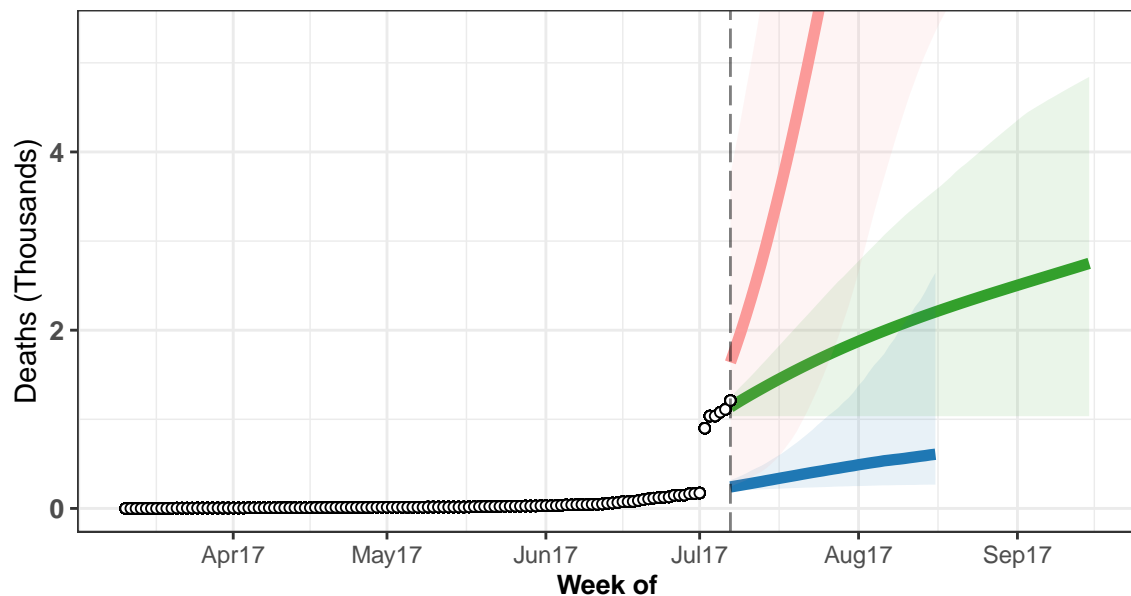

## Cumulative Out-Of-Sample Error (Post Intercept Shift)

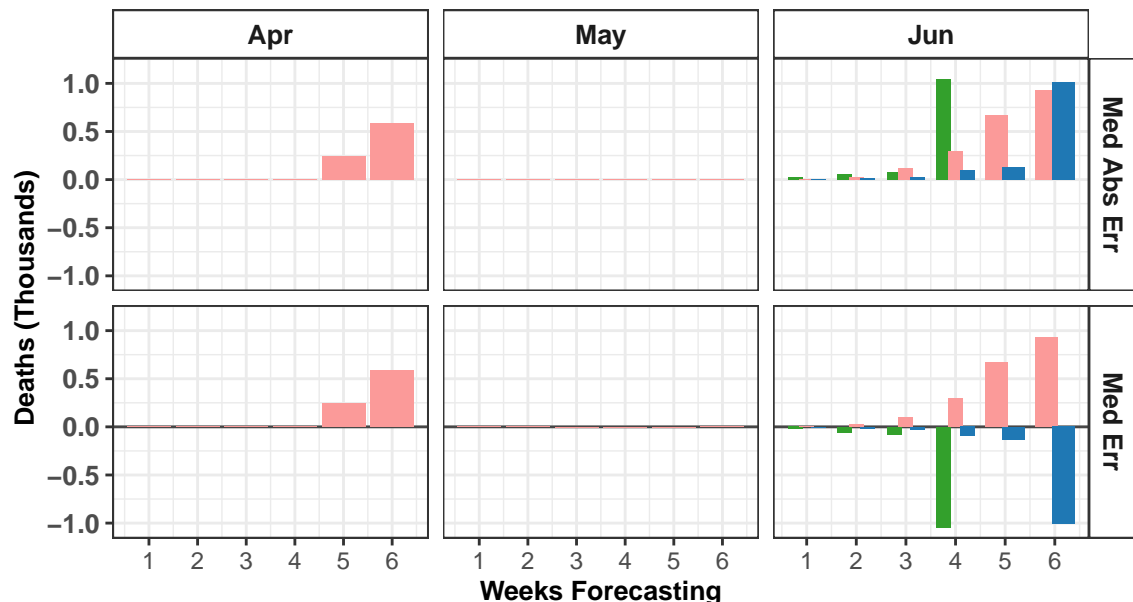

## All Model Versions

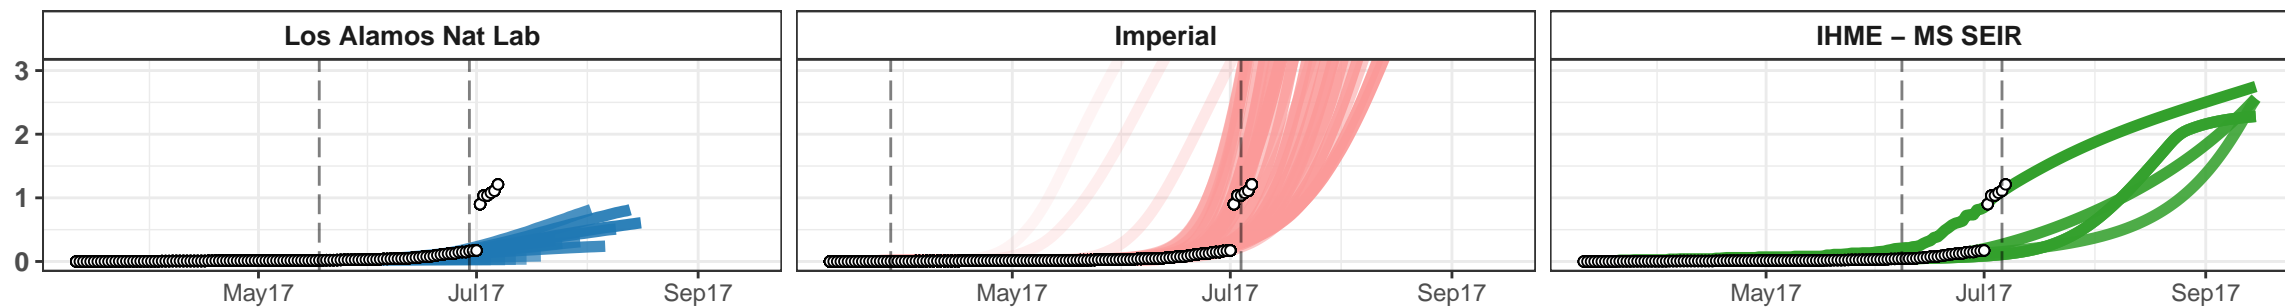

## All Cumulative Errors

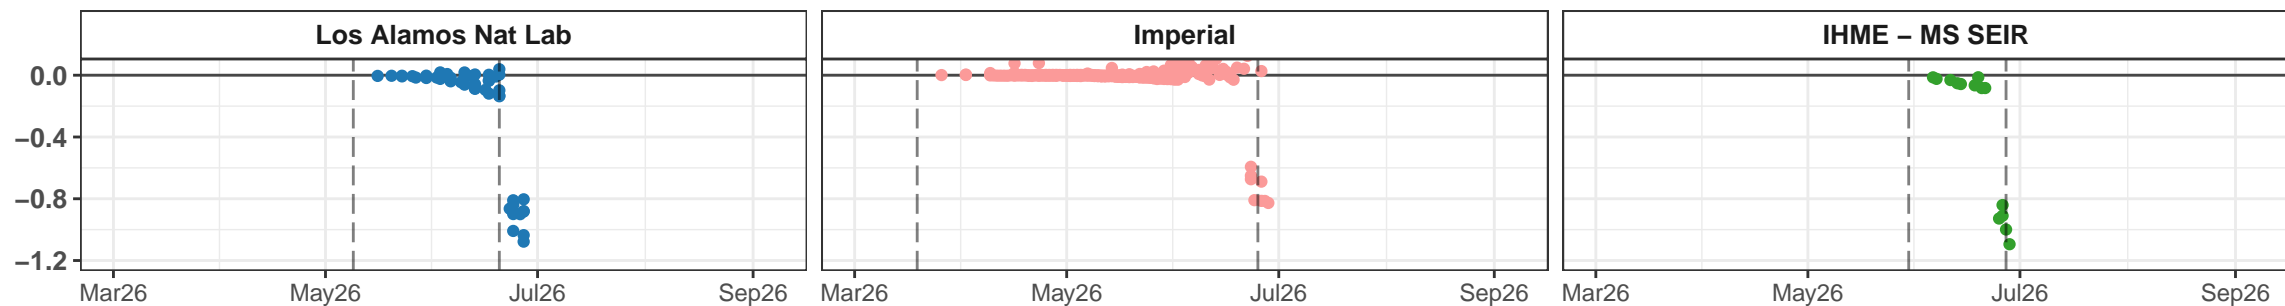

# Panama

## Current Forecast

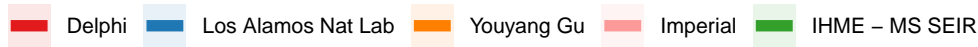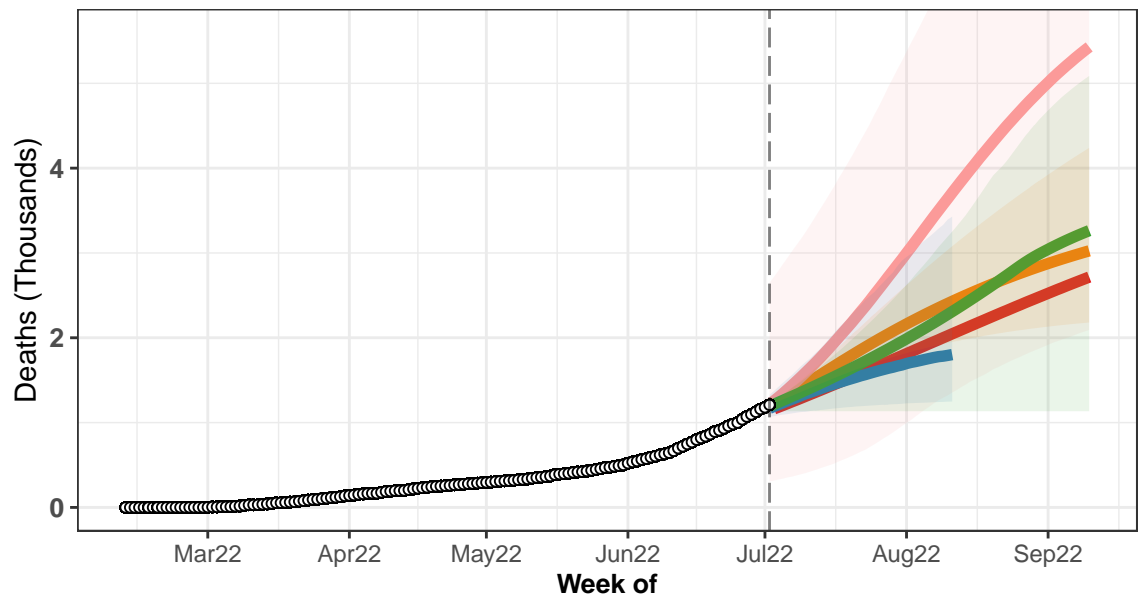

## Cumulative Out-Of-Sample Error (Post Intercept Shift)

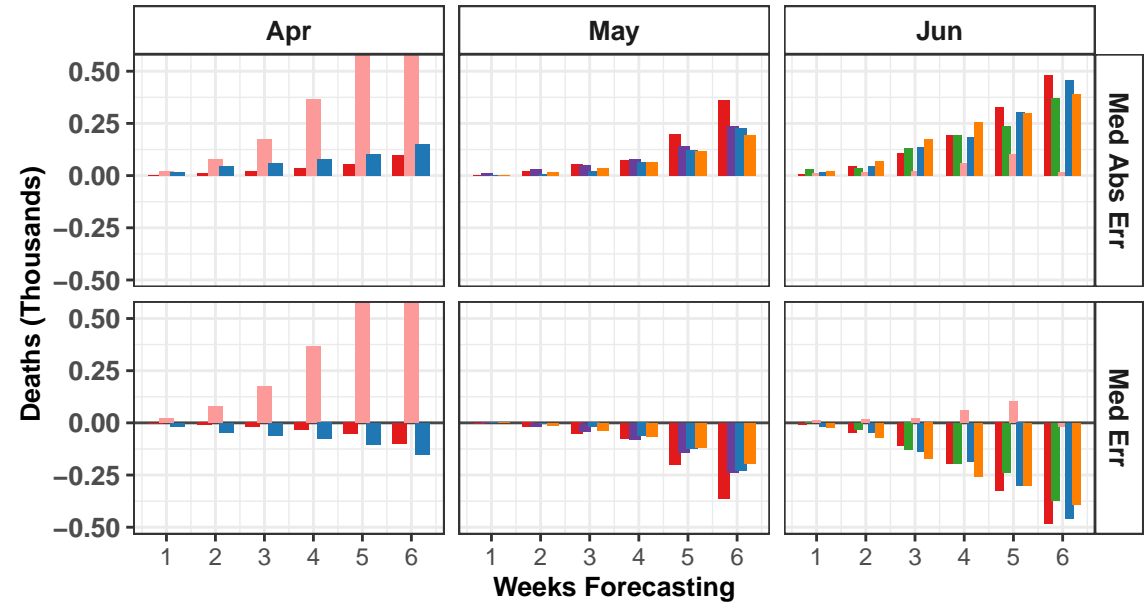

## All Model Versions

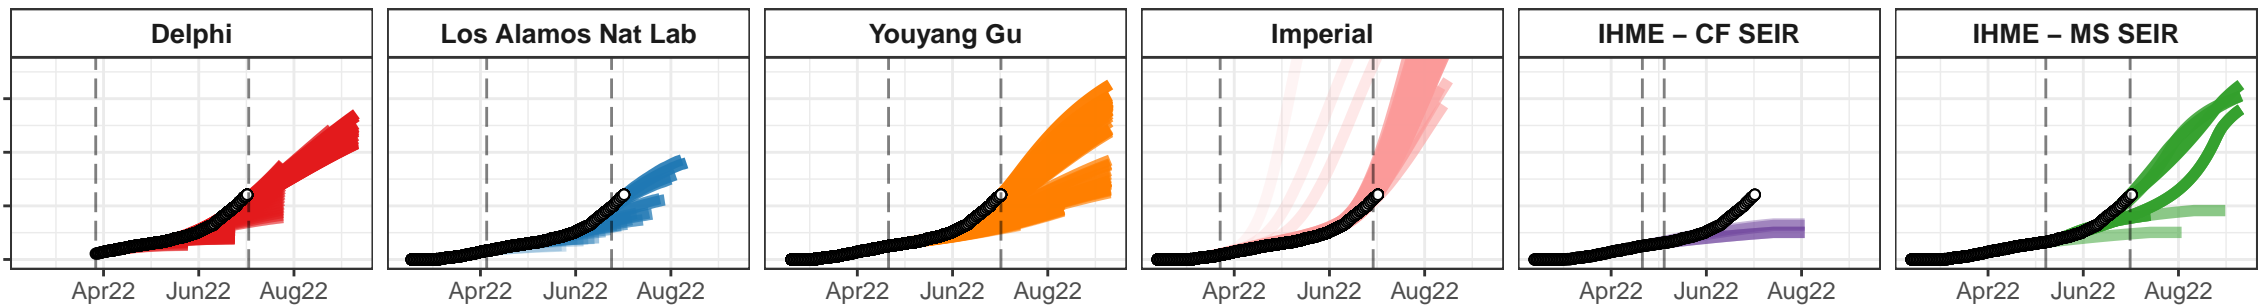

## All Cumulative Errors

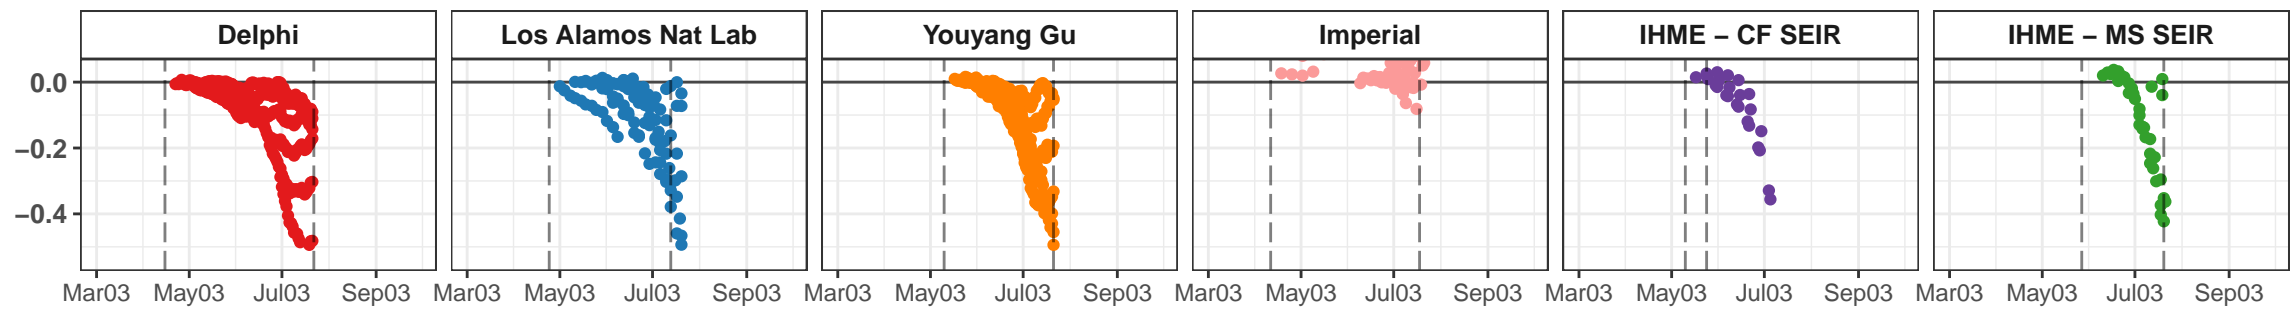

# Algeria

## Current Forecast

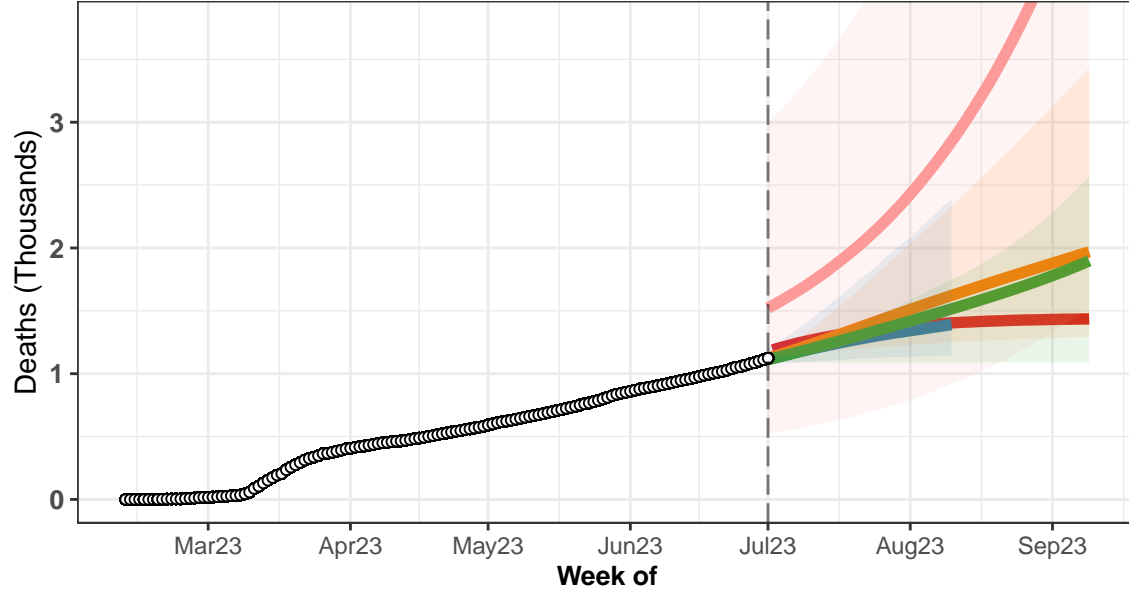

## Cumulative Out-Of-Sample Error (Post Intercept Shift)

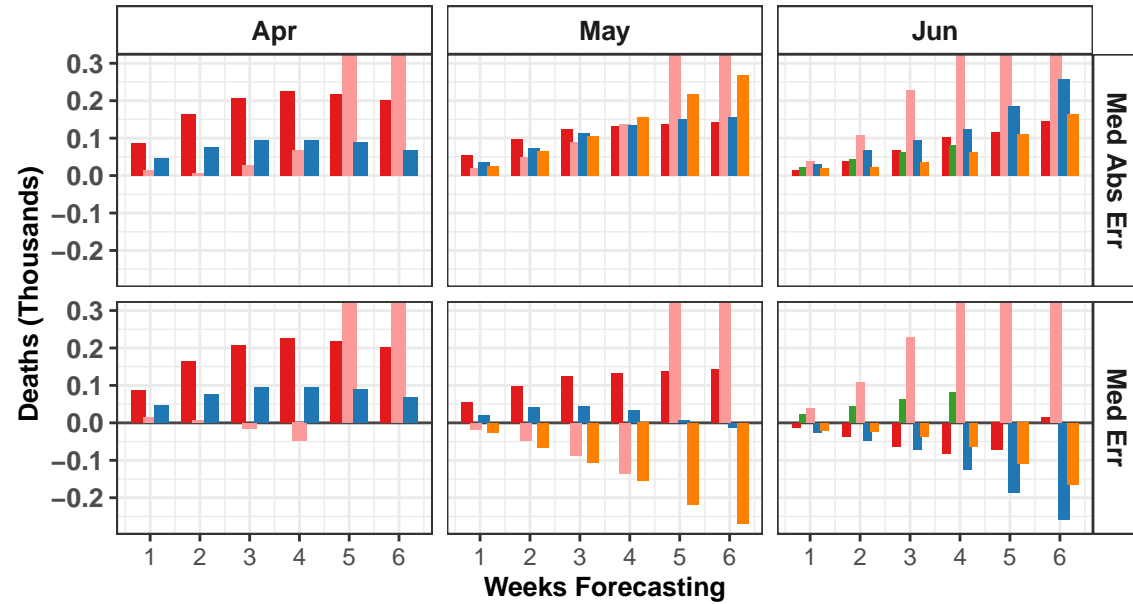

## All Model Versions

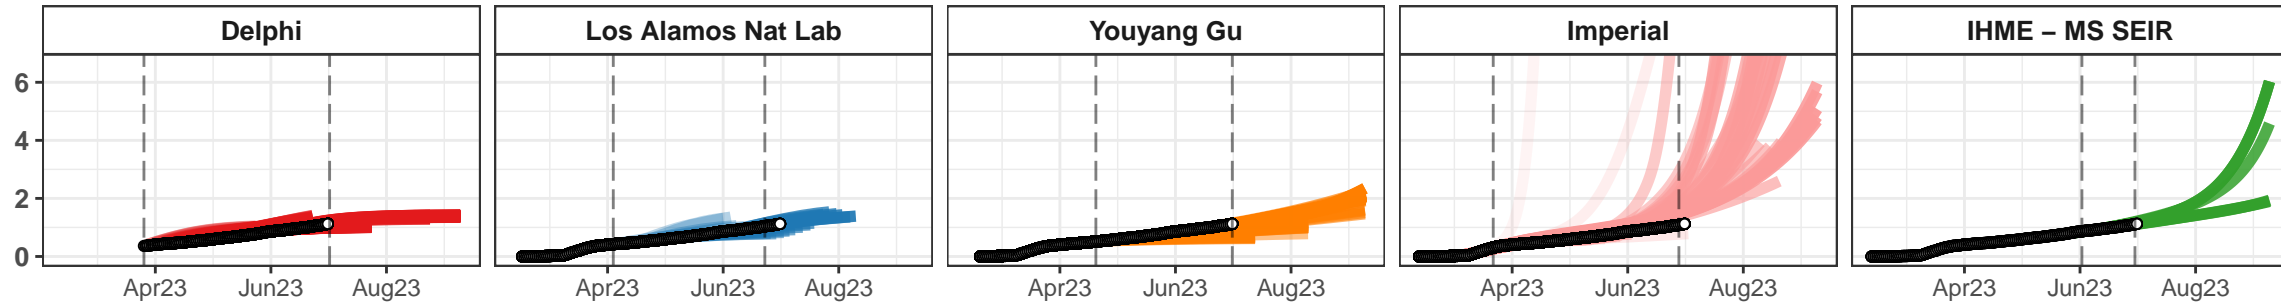

## All Cumulative Errors

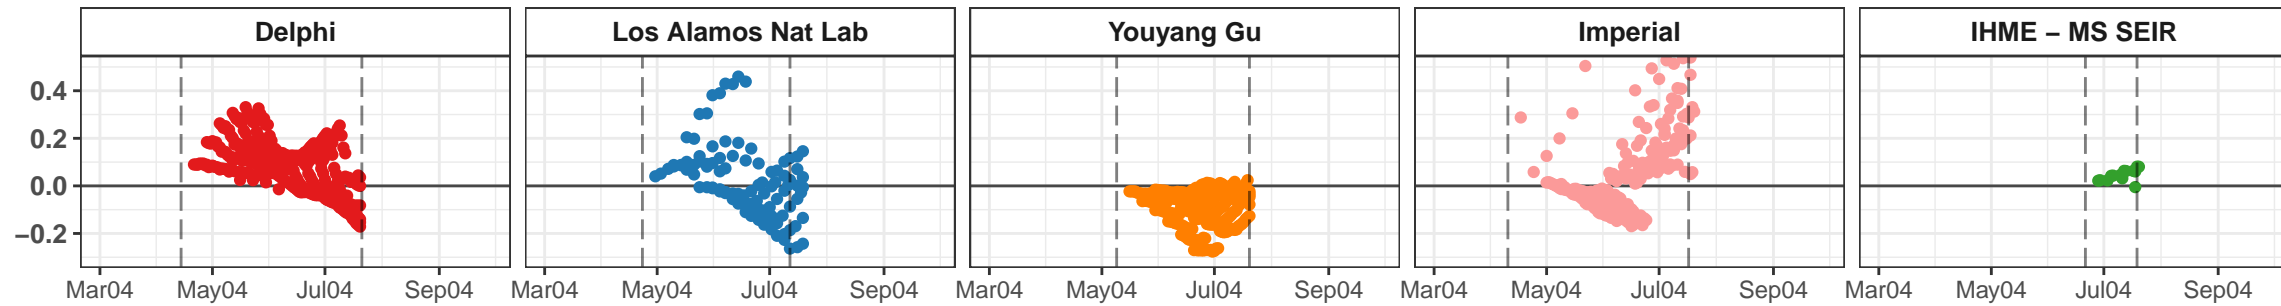

# Honduras

## Current Forecast

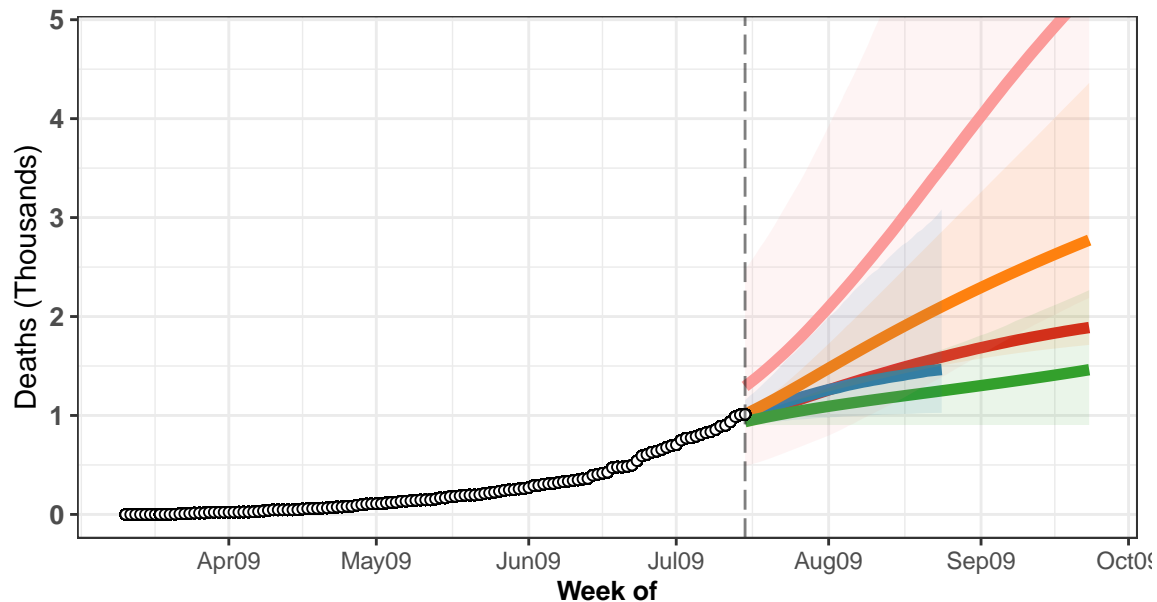

## Cumulative Out-Of-Sample Error (Post Intercept Shift)

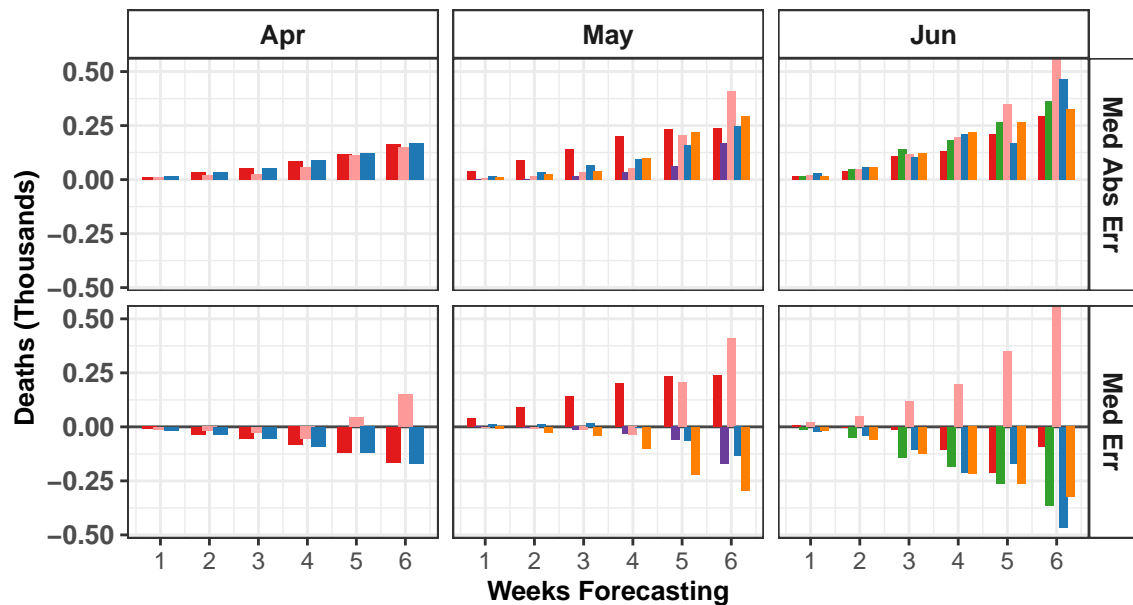

## All Model Versions

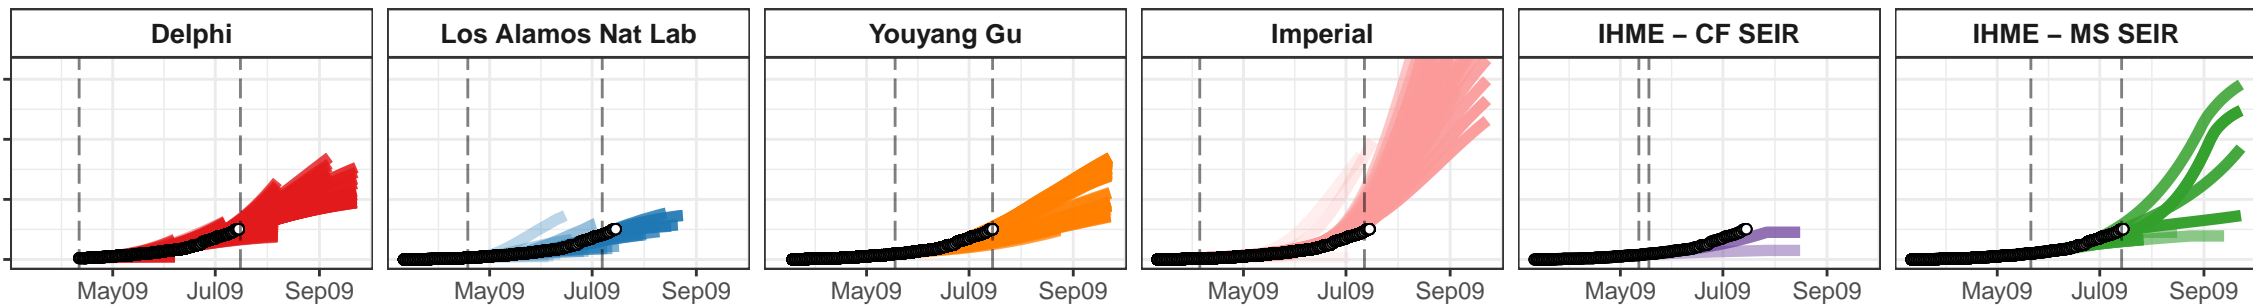

## All Cumulative Errors

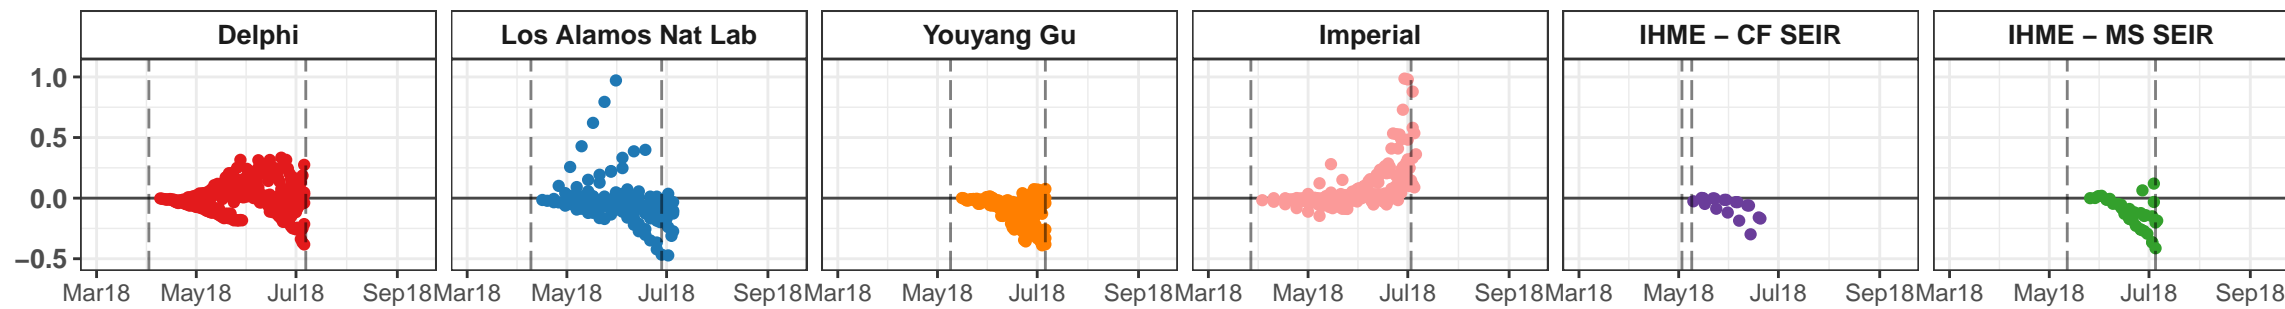

# Dominican Republic

## Current Forecast

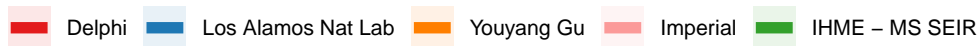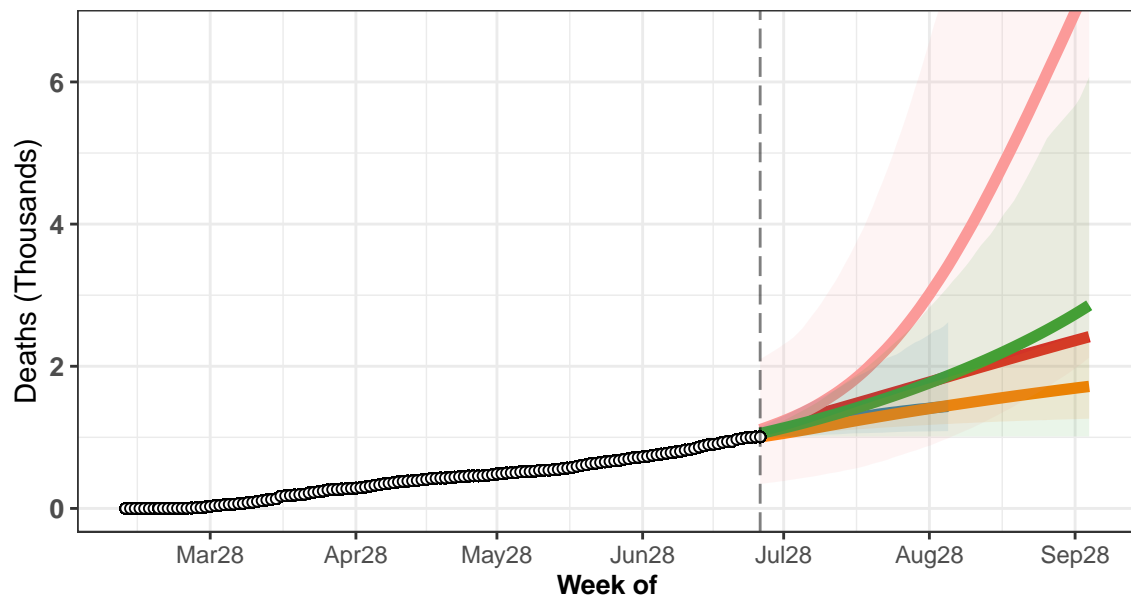

## Cumulative Out-Of-Sample Error (Post Intercept Shift)

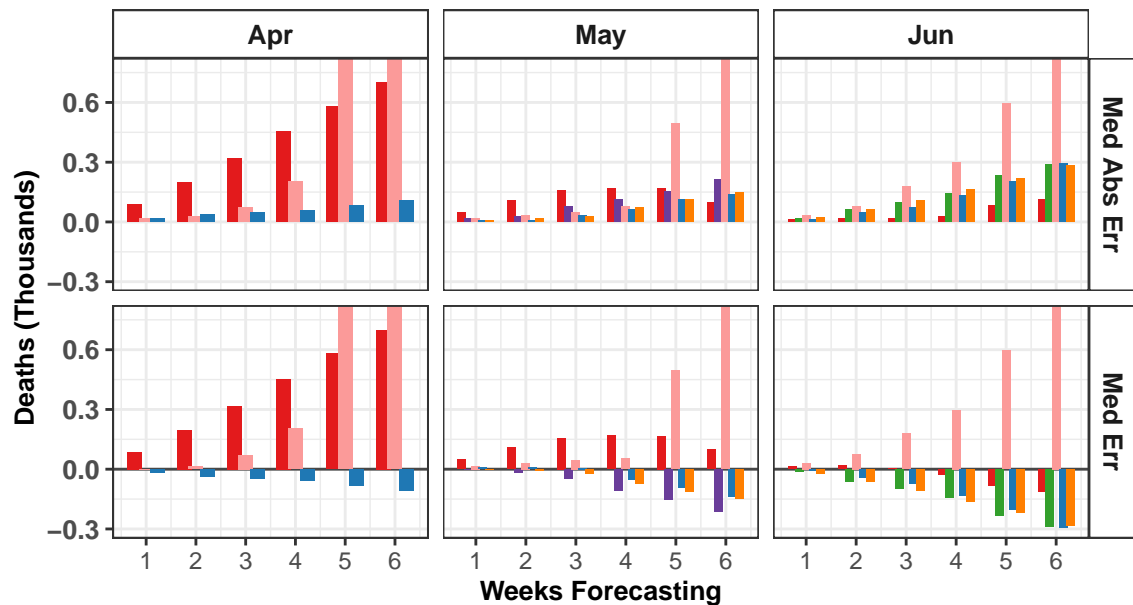

## All Model Versions

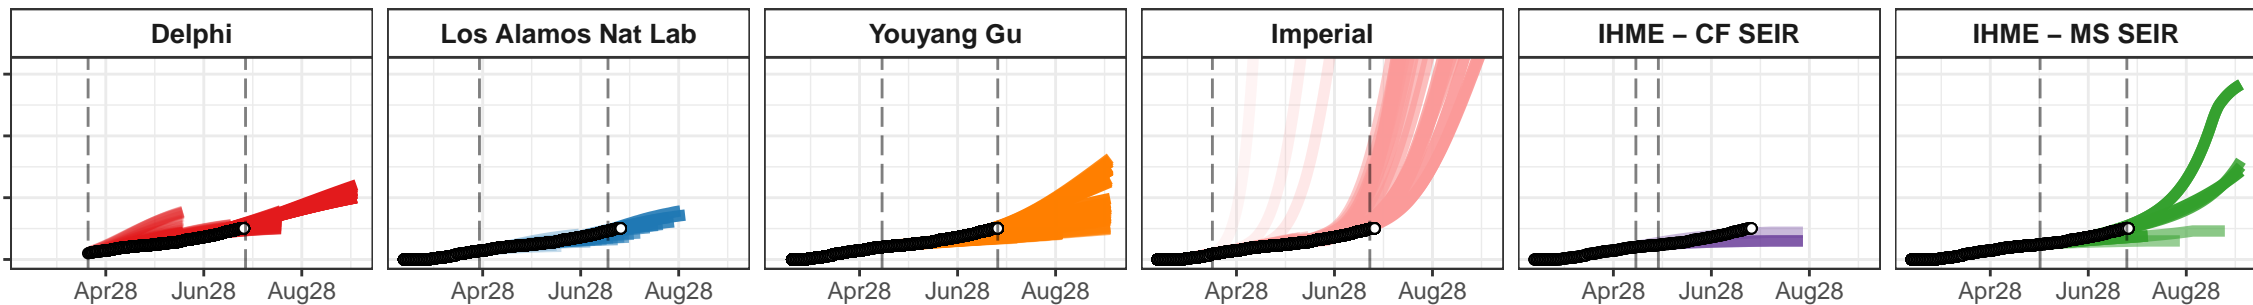

## All Cumulative Errors

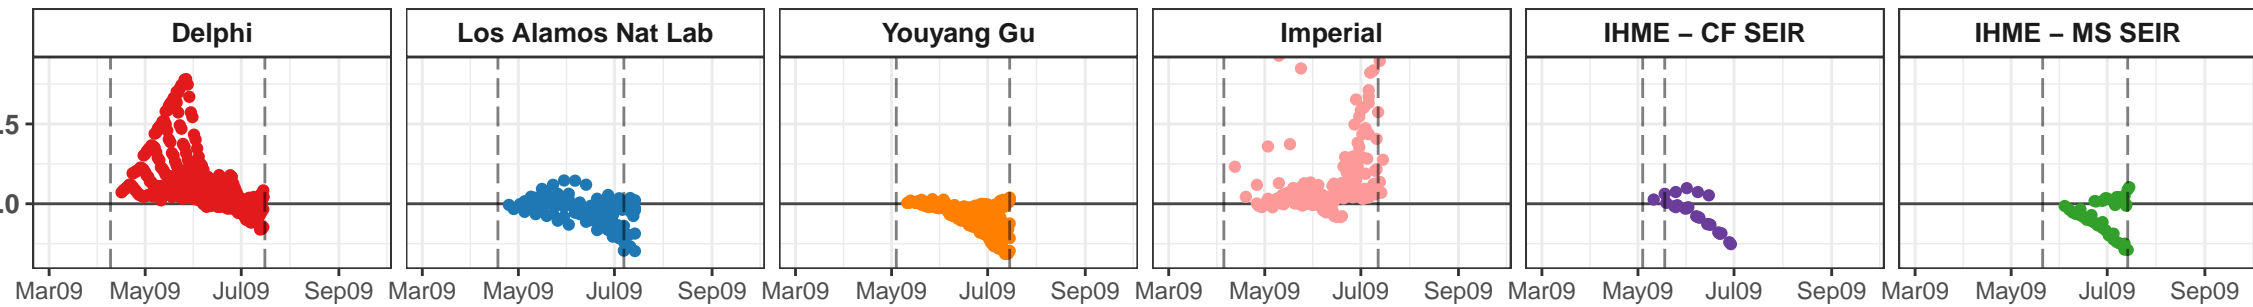

# Rhode Island

## Current Forecast

Delphi Los Alamos Nat Lab Youyang Gu IHME - MS SEIR ○ JHU △ NYT

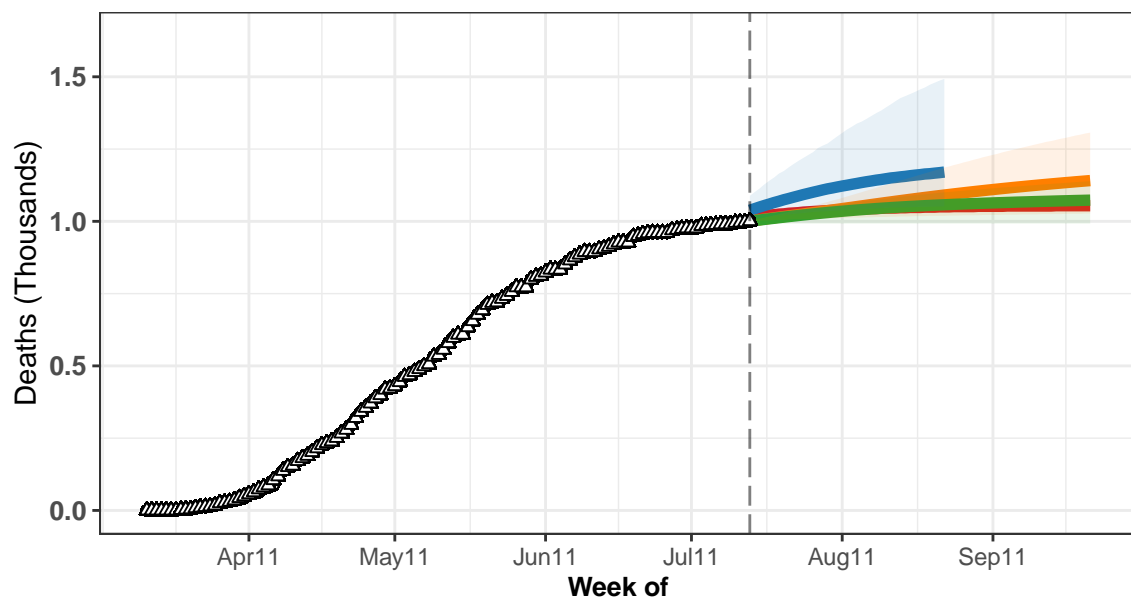

## Cumulative Out-Of-Sample Error (Post Intercept Shift)

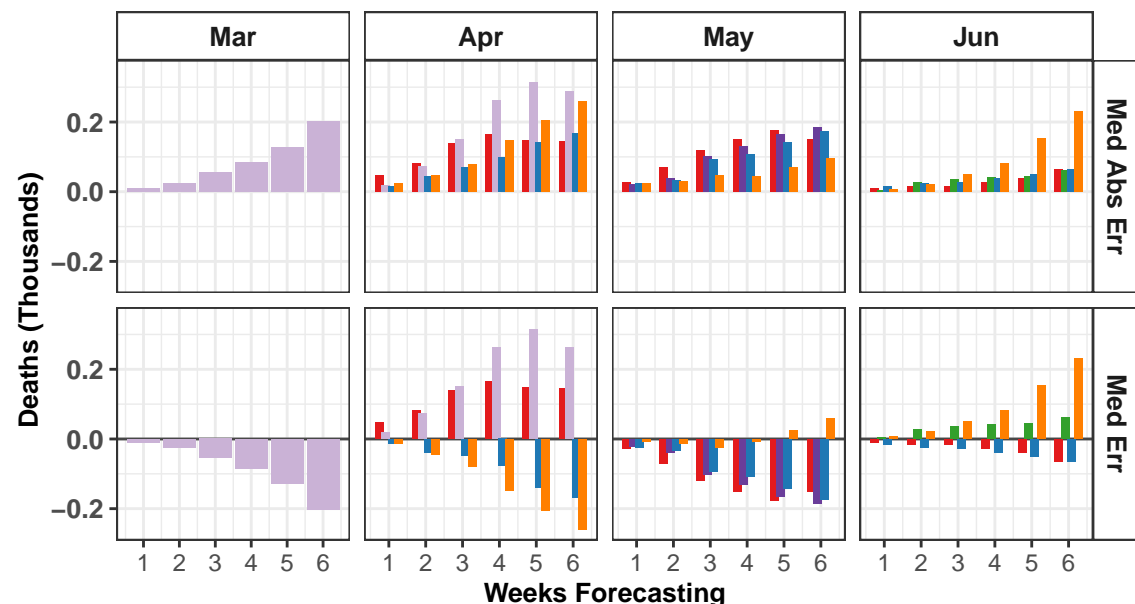

## All Model Versions

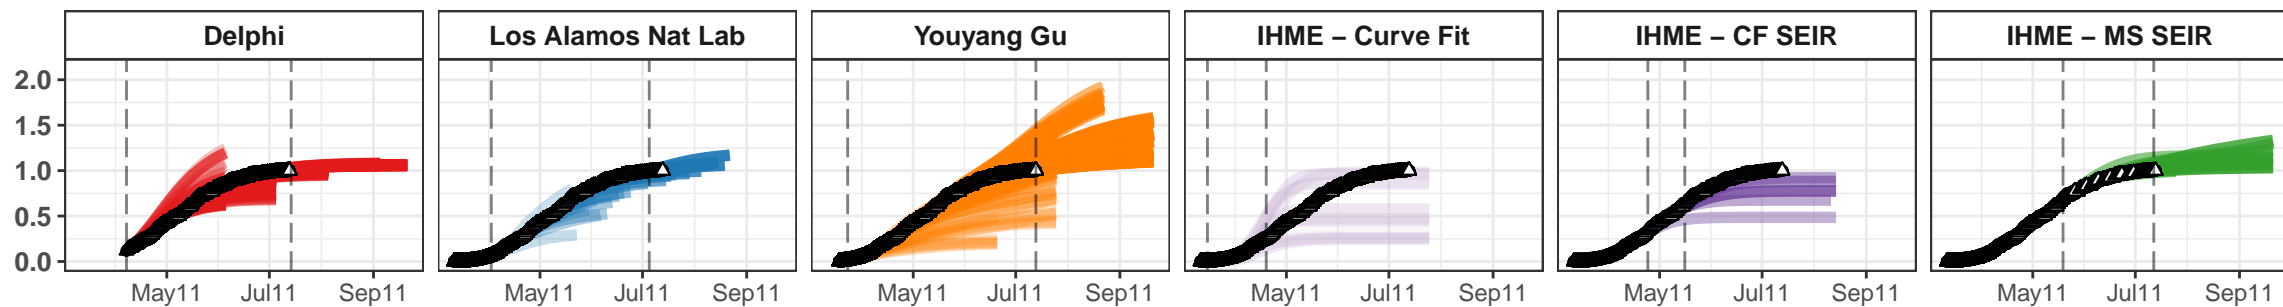

## All Cumulative Errors

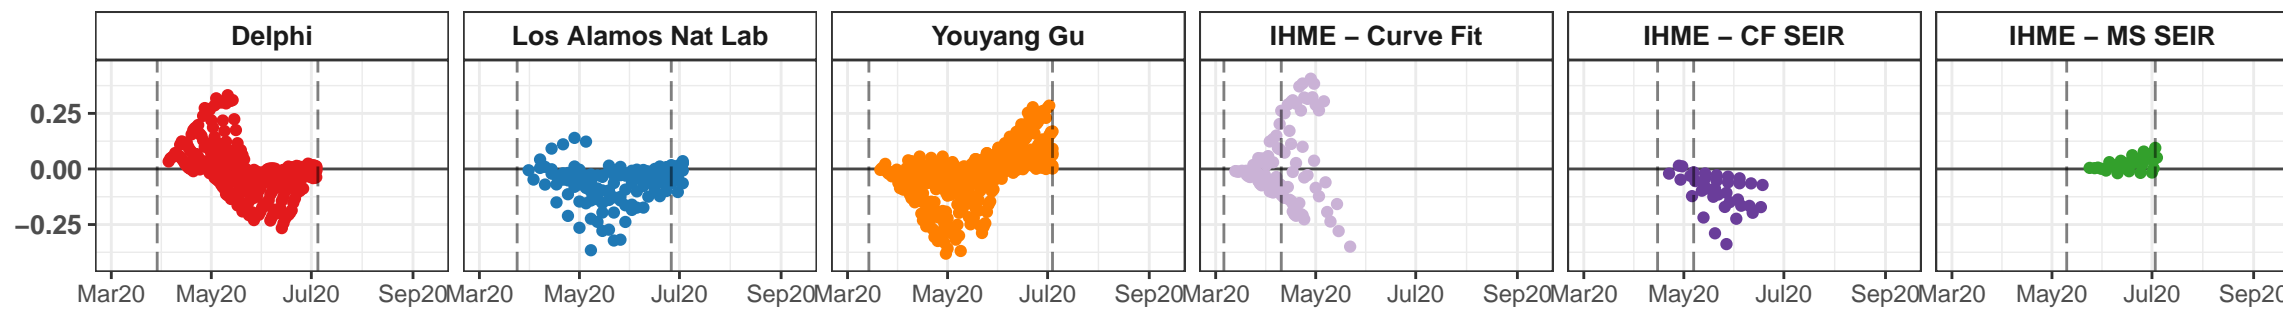



# Japan

## Current Forecast

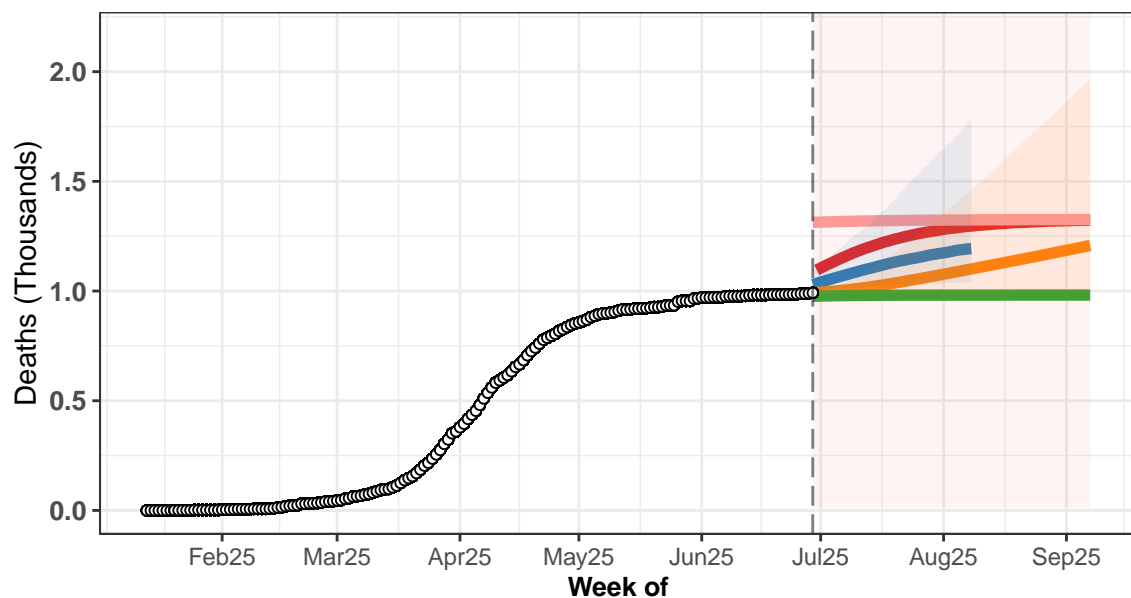

## Cumulative Out-Of-Sample Error (Post Intercept Shift)

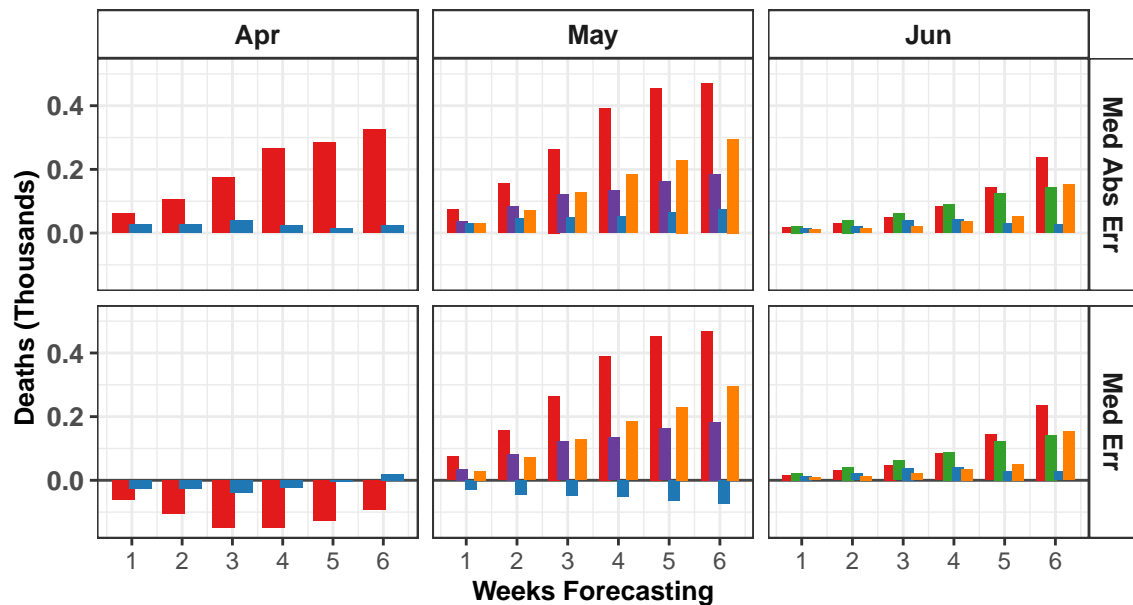

## All Model Versions

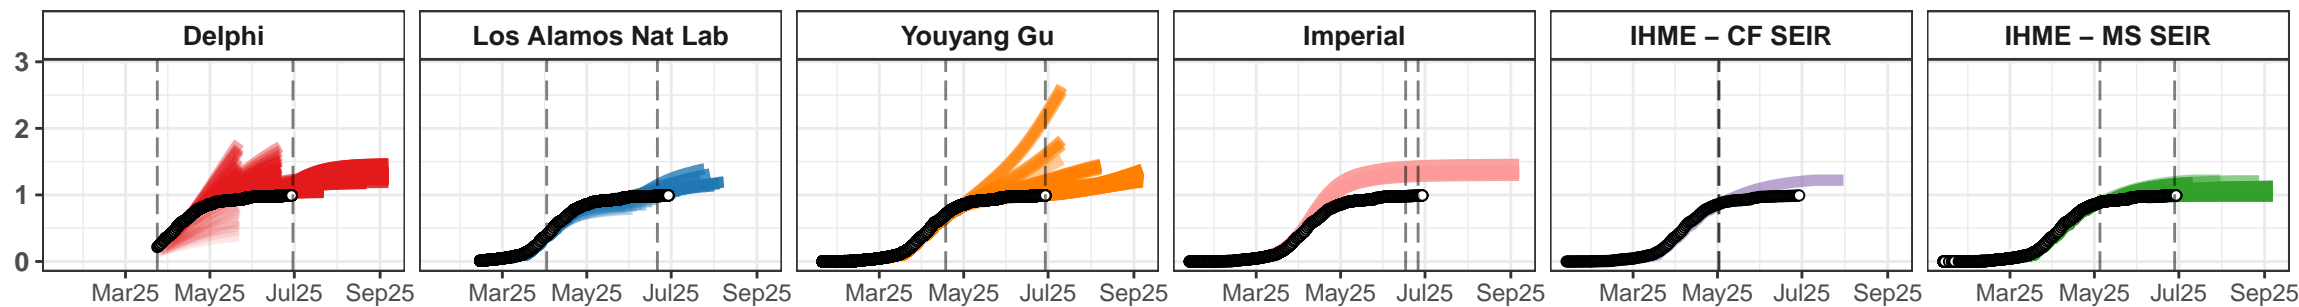

## All Cumulative Errors

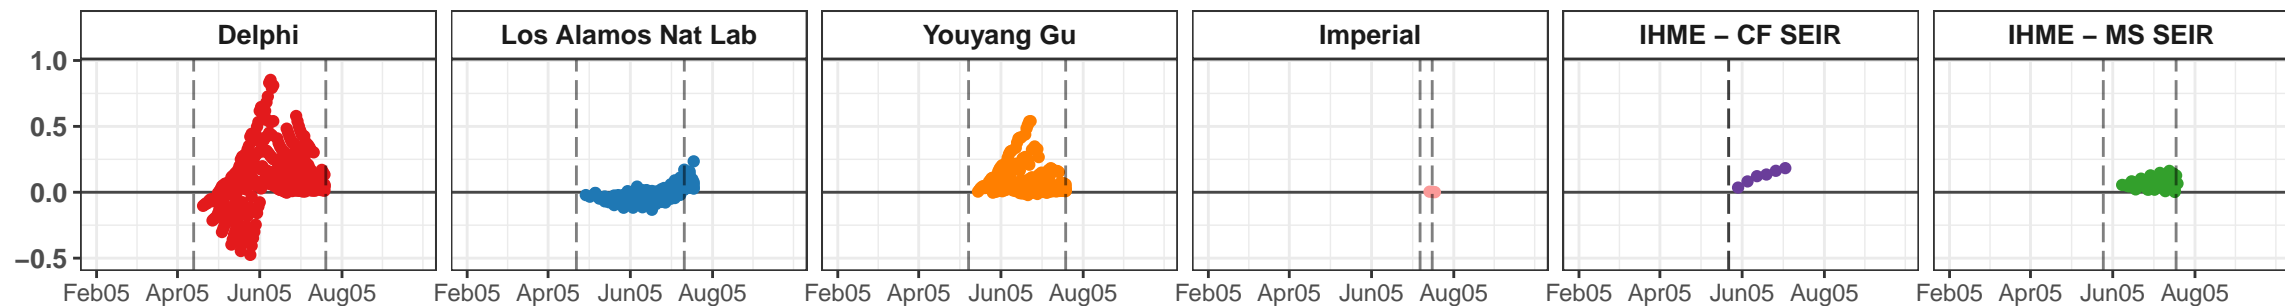

# Tennessee

## Current Forecast

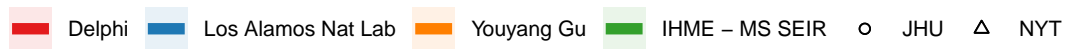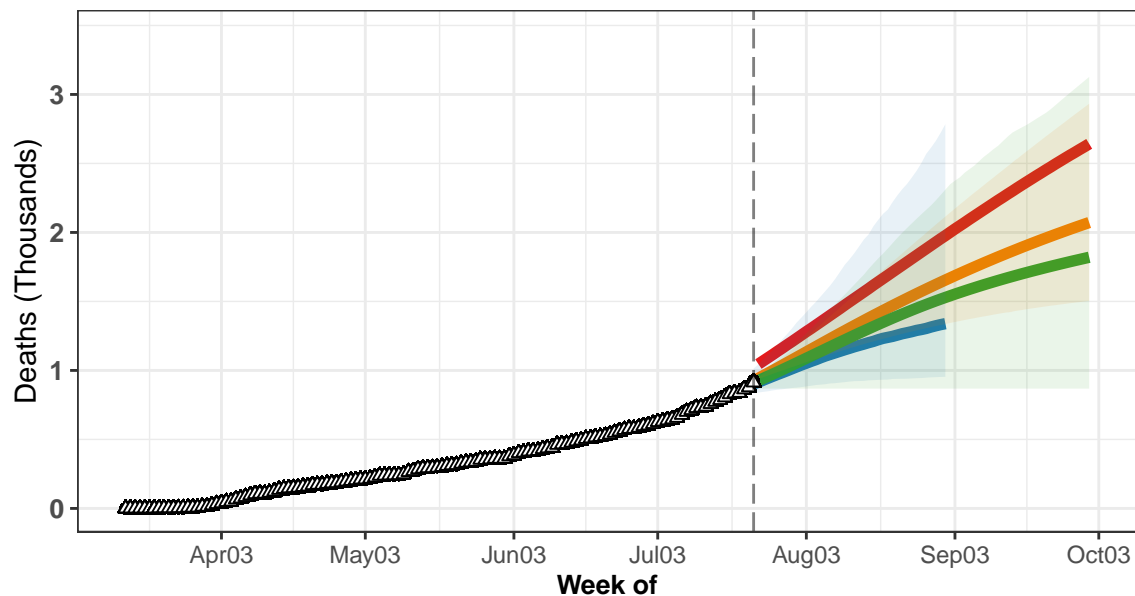

## Cumulative Out-Of-Sample Error (Post Intercept Shift)

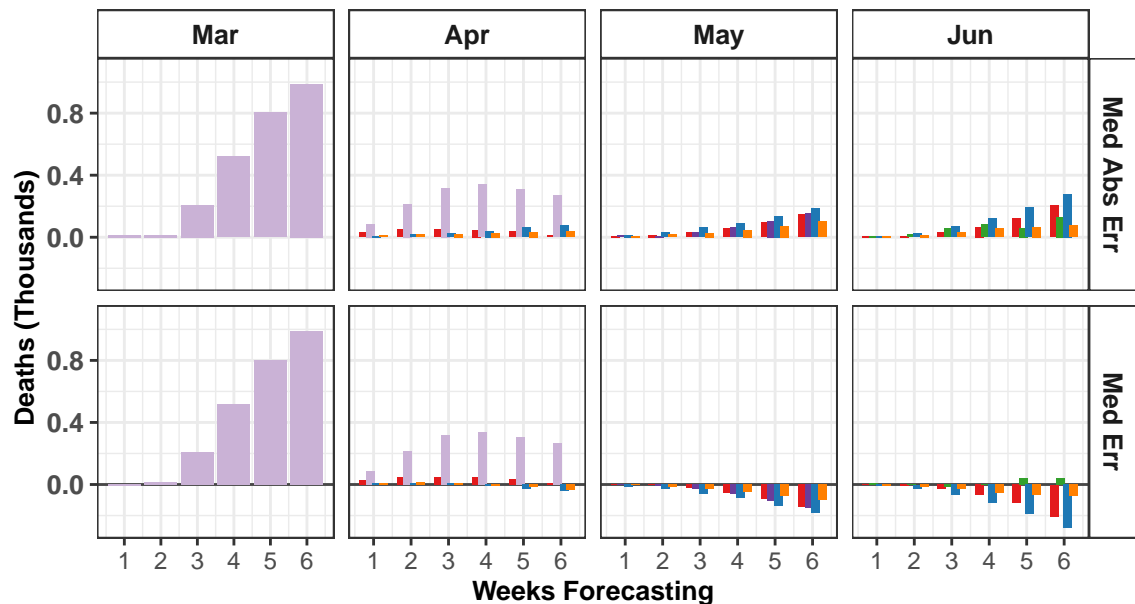

## All Model Versions

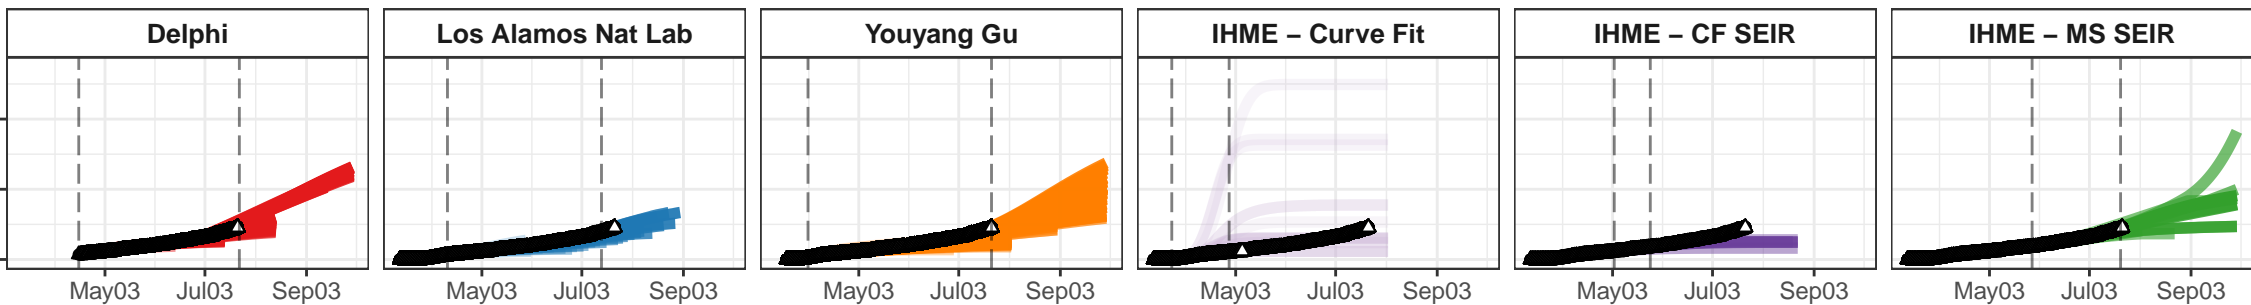

## All Cumulative Errors

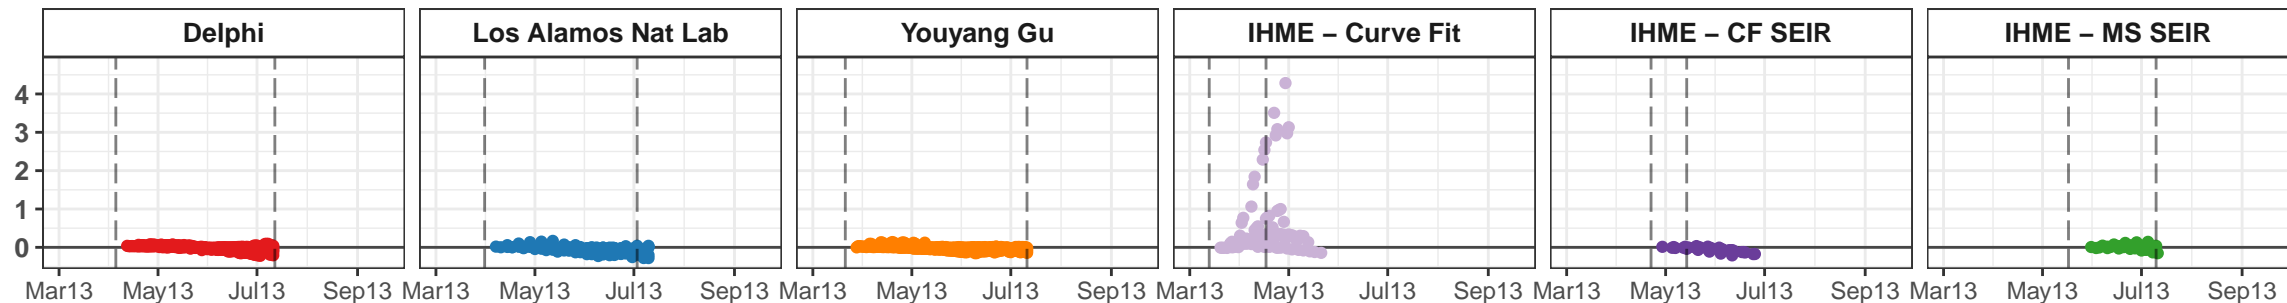

# Wisconsin

## Current Forecast

Delphi Los Alamos Nat Lab Youyang Gu IHME – MS SEIR ○ JHU △ NYT

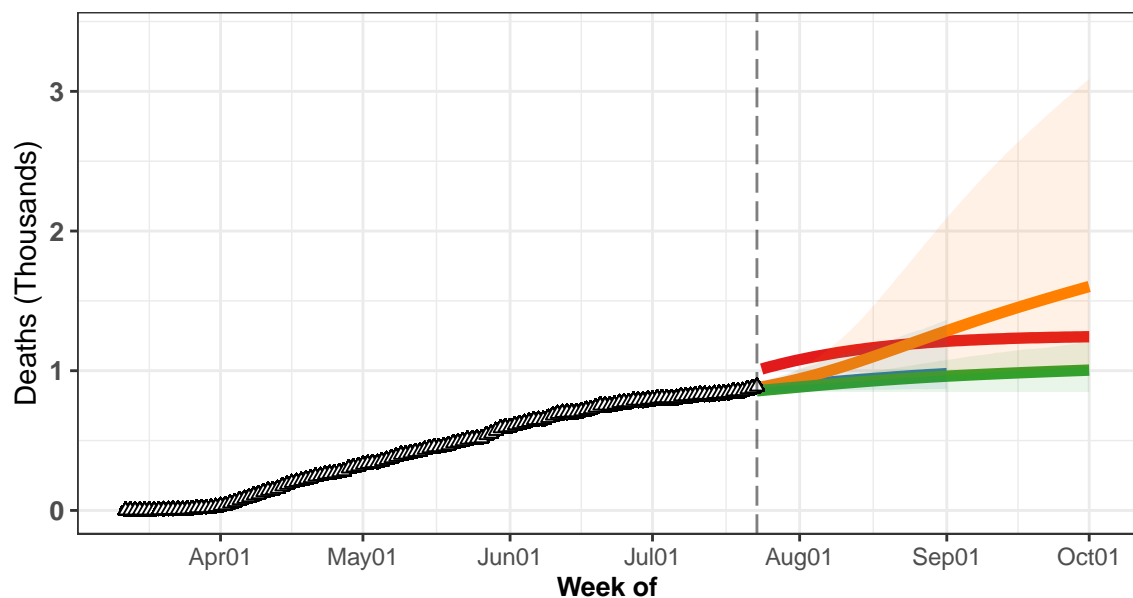

## Cumulative Out-Of-Sample Error (Post Intercept Shift)

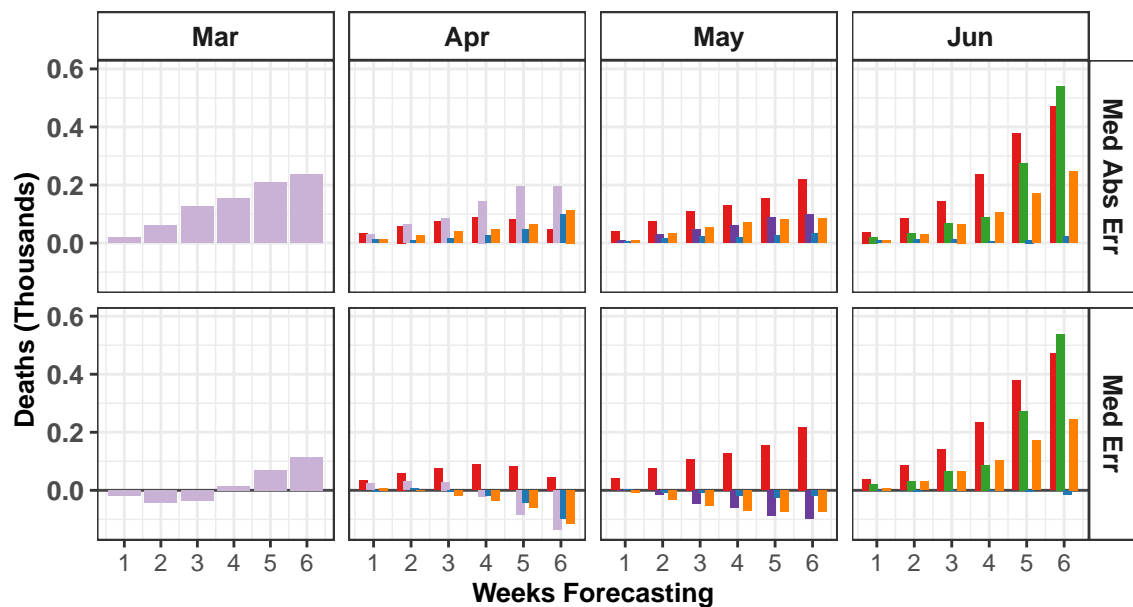

## All Model Versions

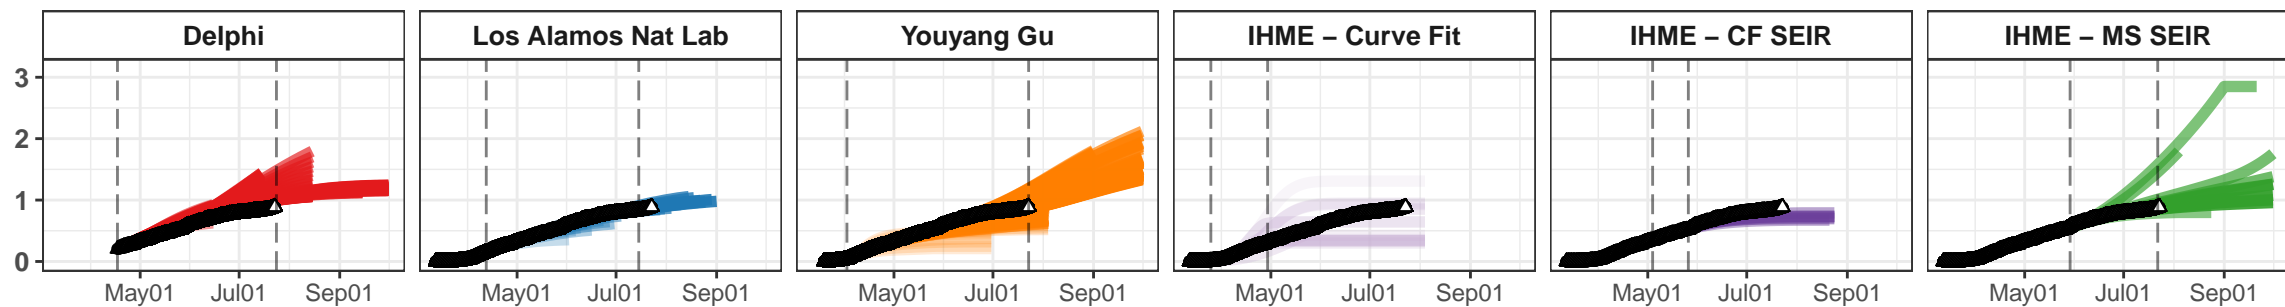

## All Cumulative Errors

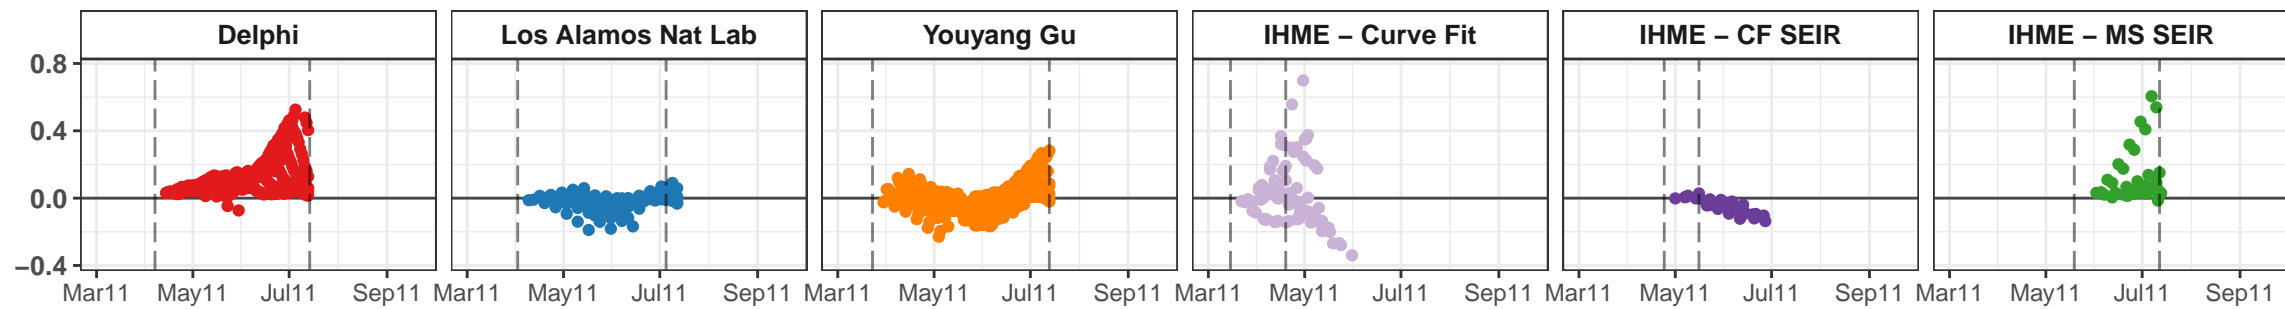

# Nigeria

## Current Forecast

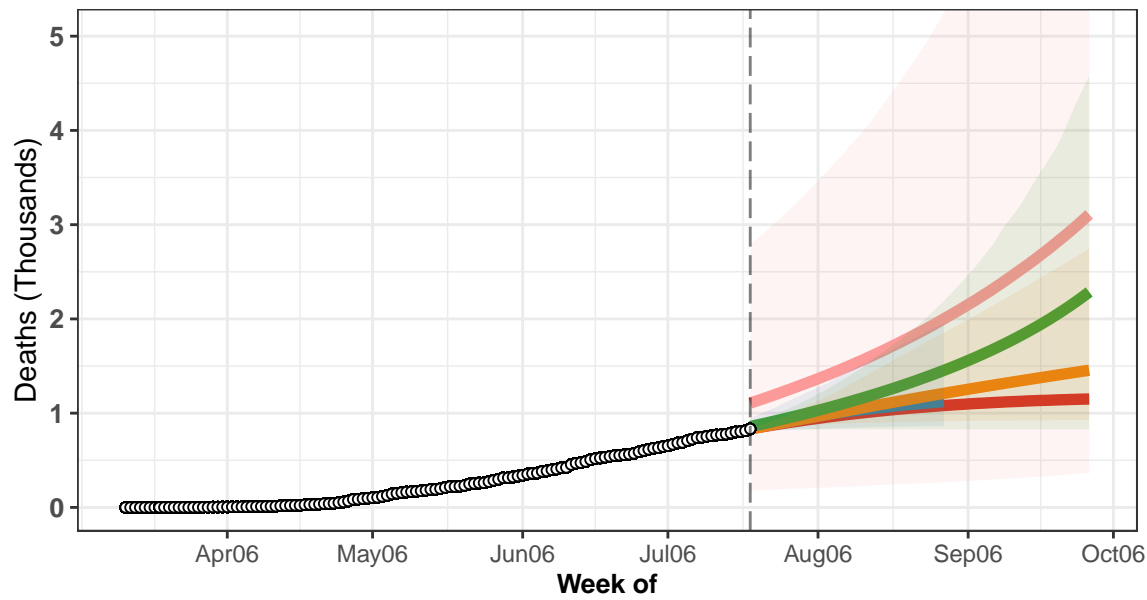

## Cumulative Out-Of-Sample Error (Post Intercept Shift)

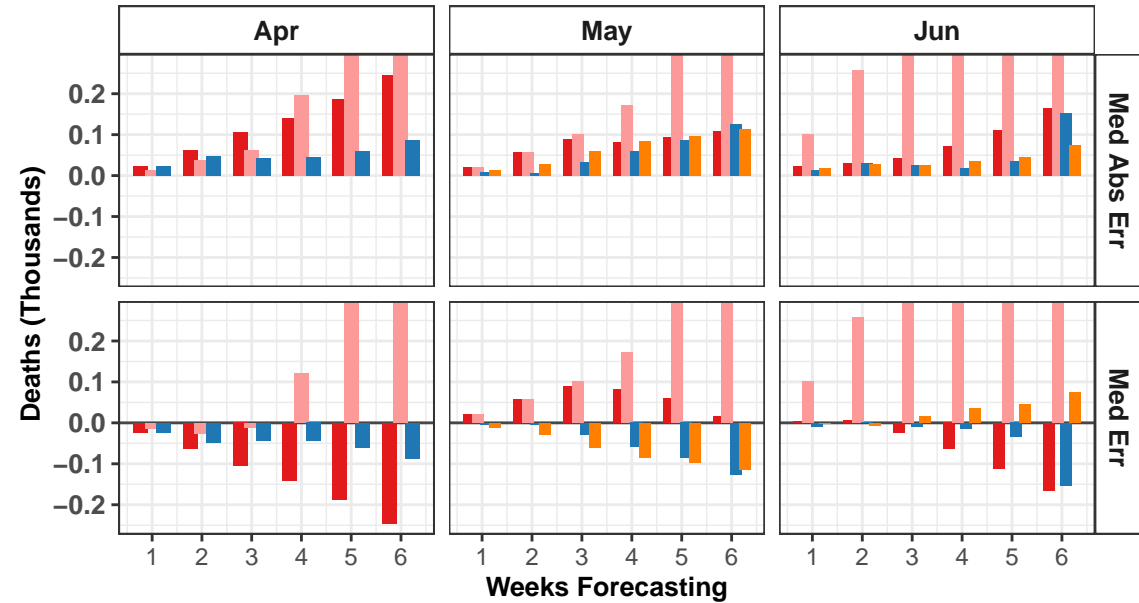

## All Model Versions

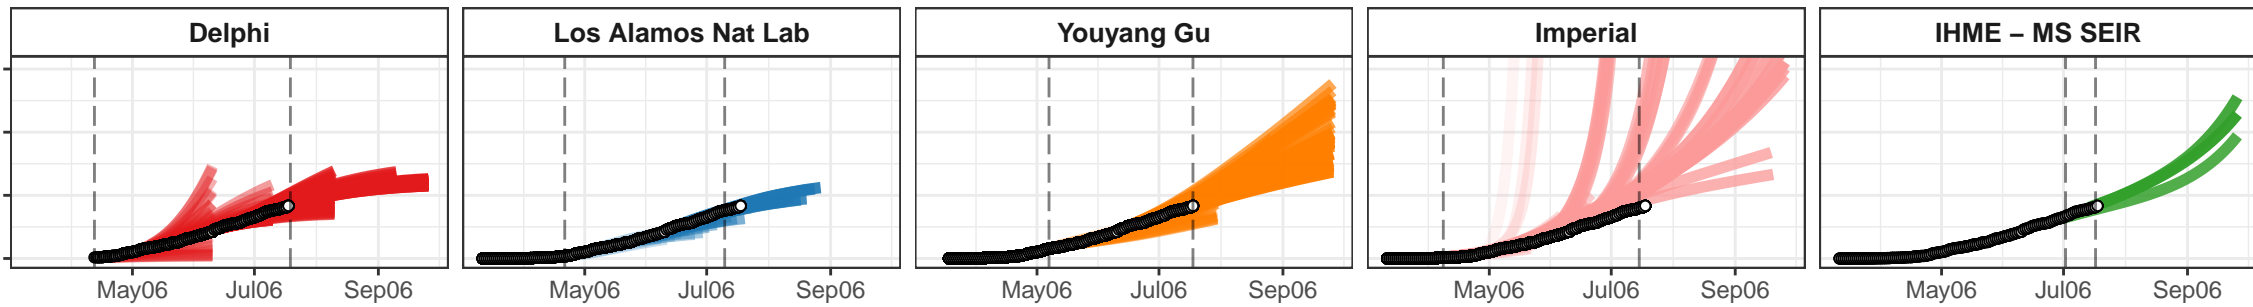

## All Cumulative Errors

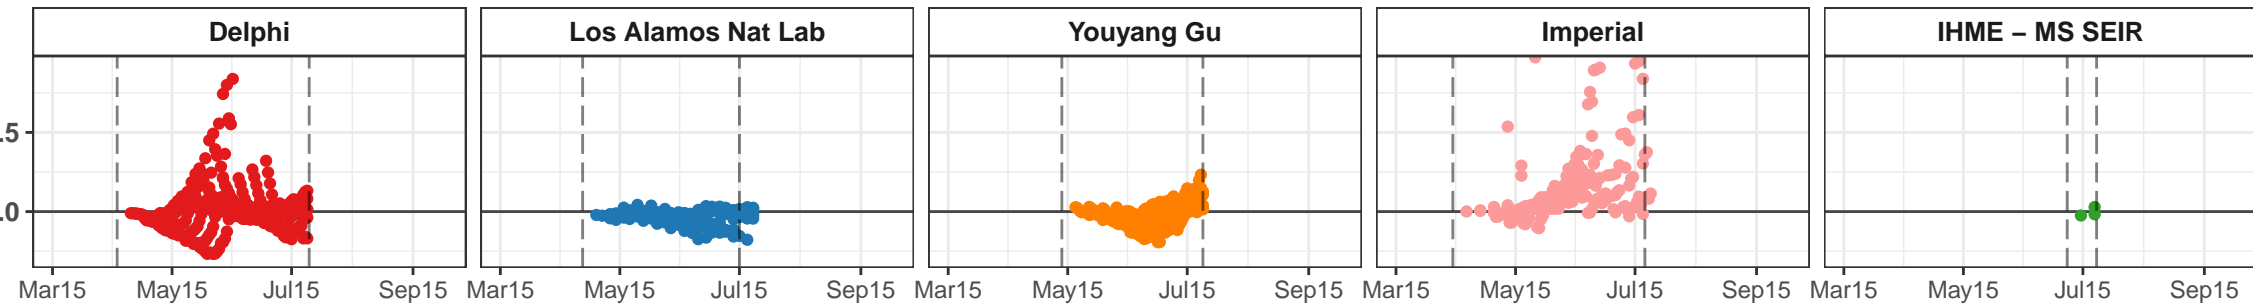

# Iowa

## Current Forecast

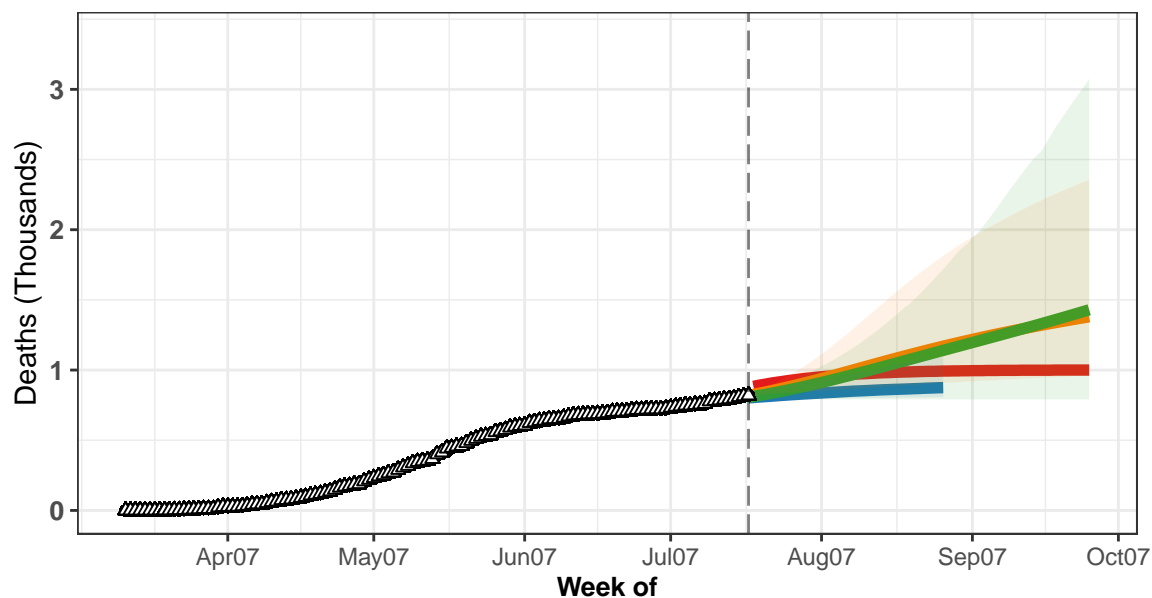

## Cumulative Out-Of-Sample Error (Post Intercept Shift)

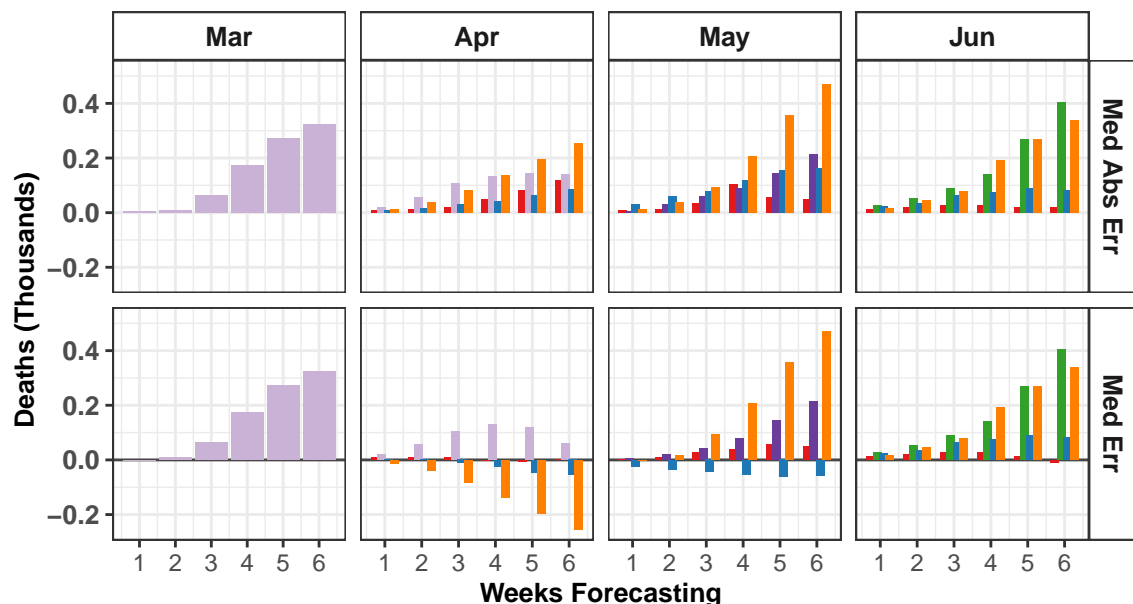

## All Model Versions

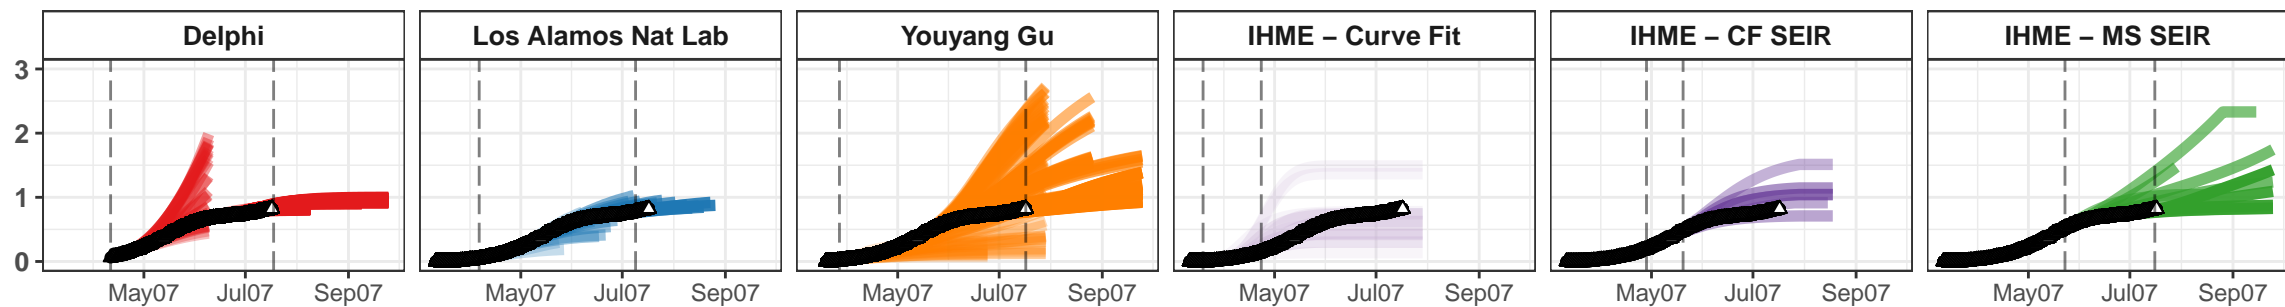

## All Cumulative Errors

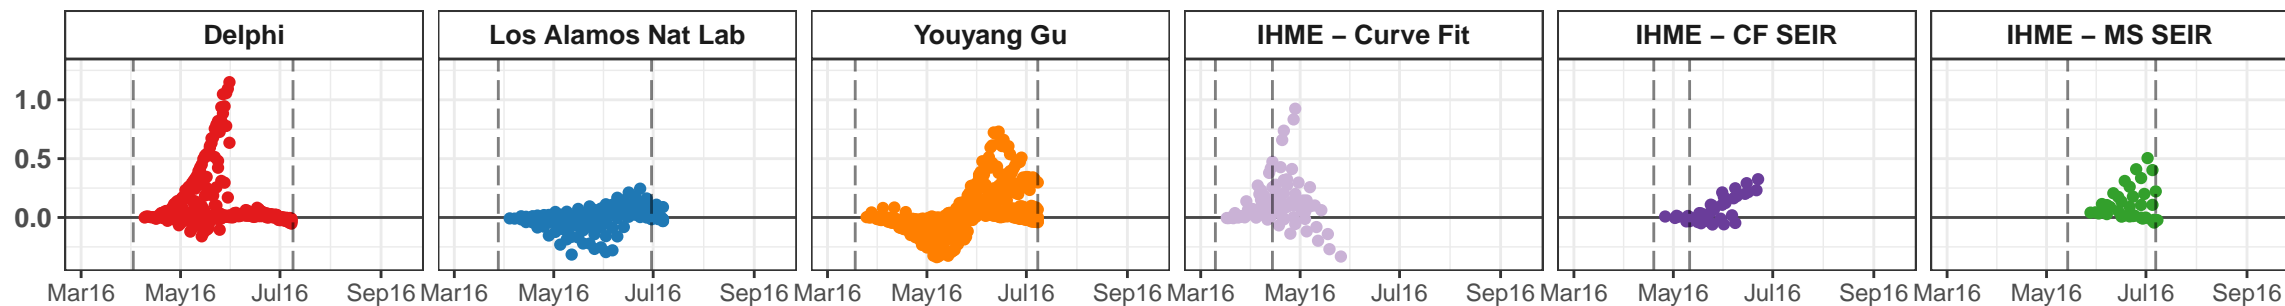

# Moldova

## Current Forecast

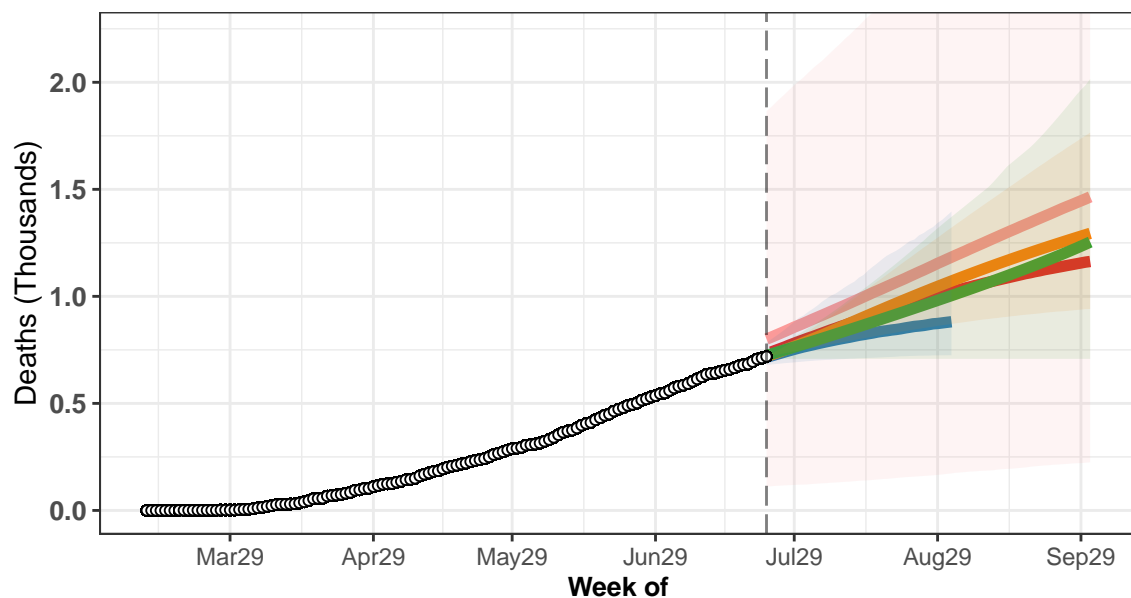

## Cumulative Out-Of-Sample Error (Post Intercept Shift)

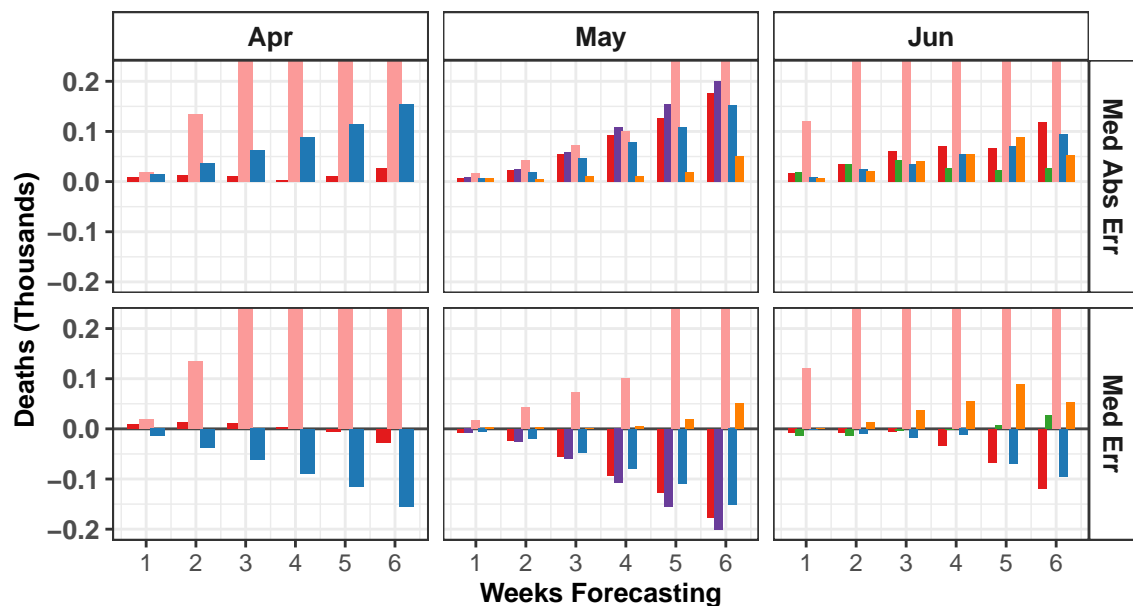

## All Model Versions

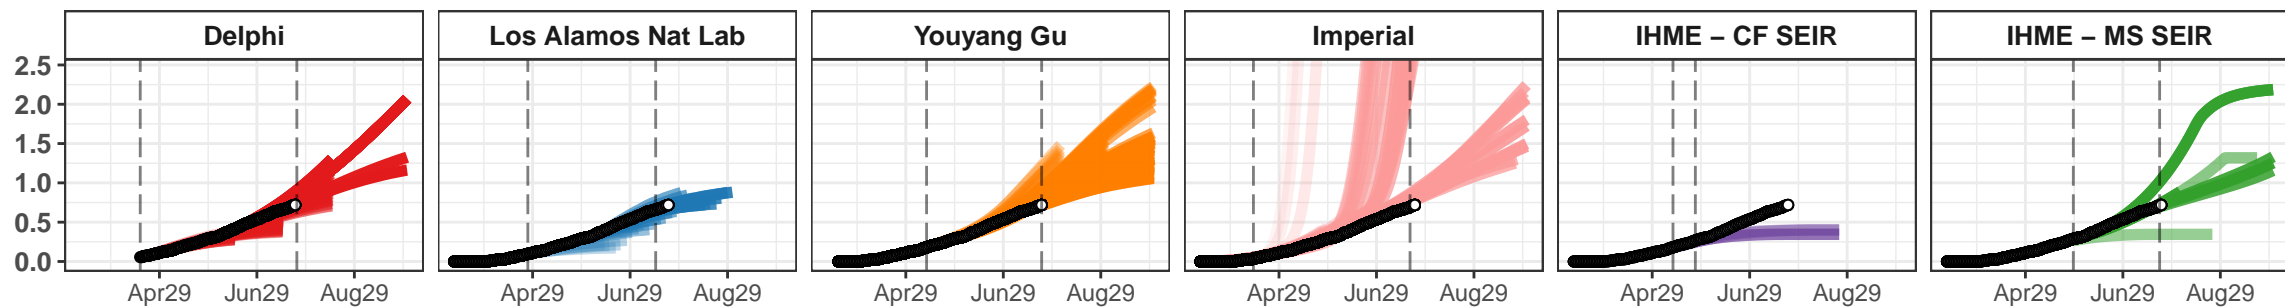

## All Cumulative Errors

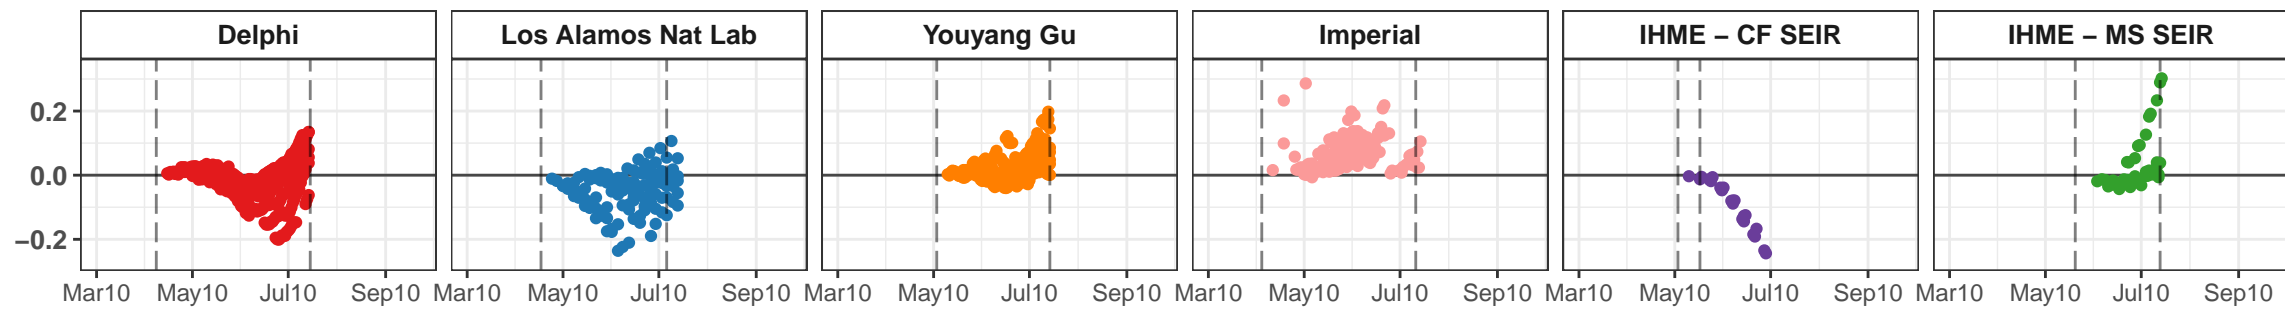

# Austria

## Current Forecast

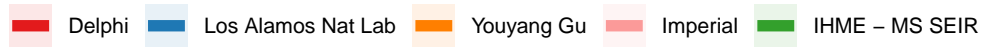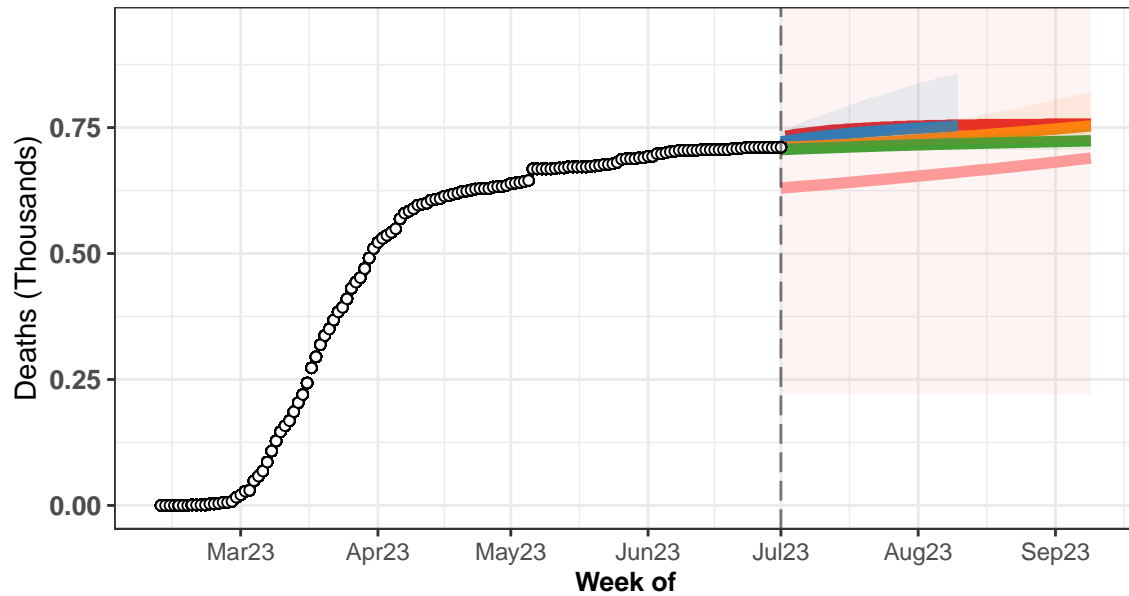

## Cumulative Out-Of-Sample Error (Post Intercept Shift)

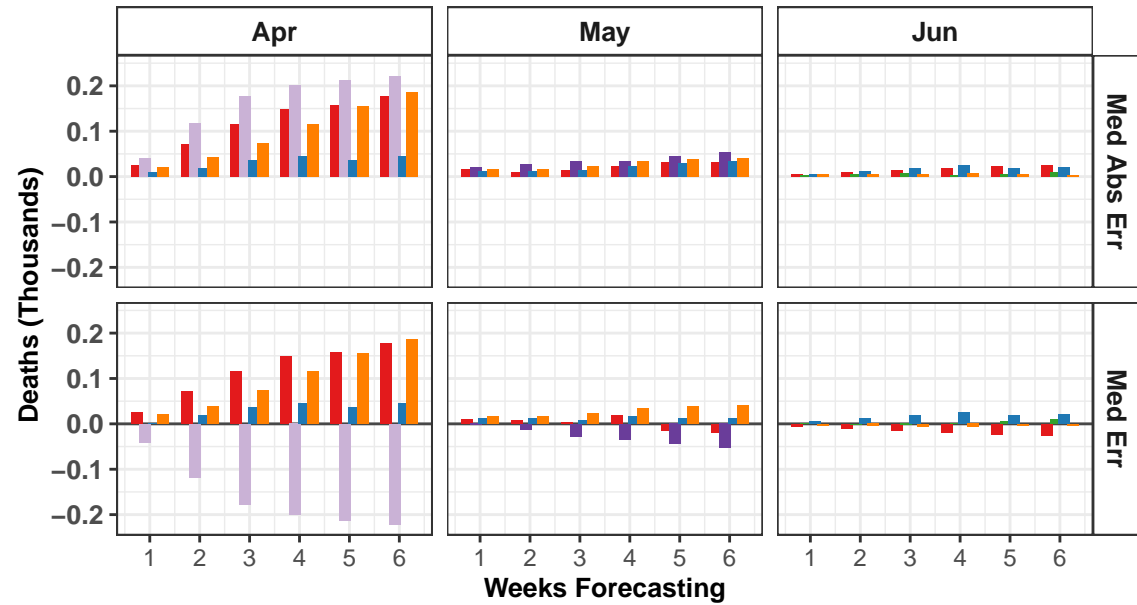

## All Model Versions

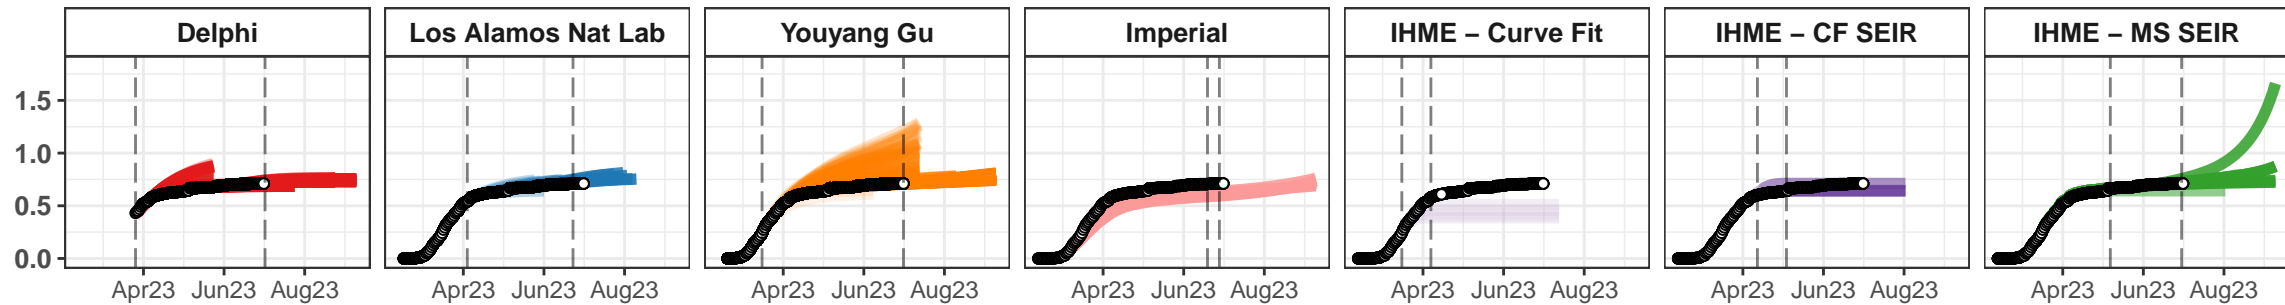

## All Cumulative Errors

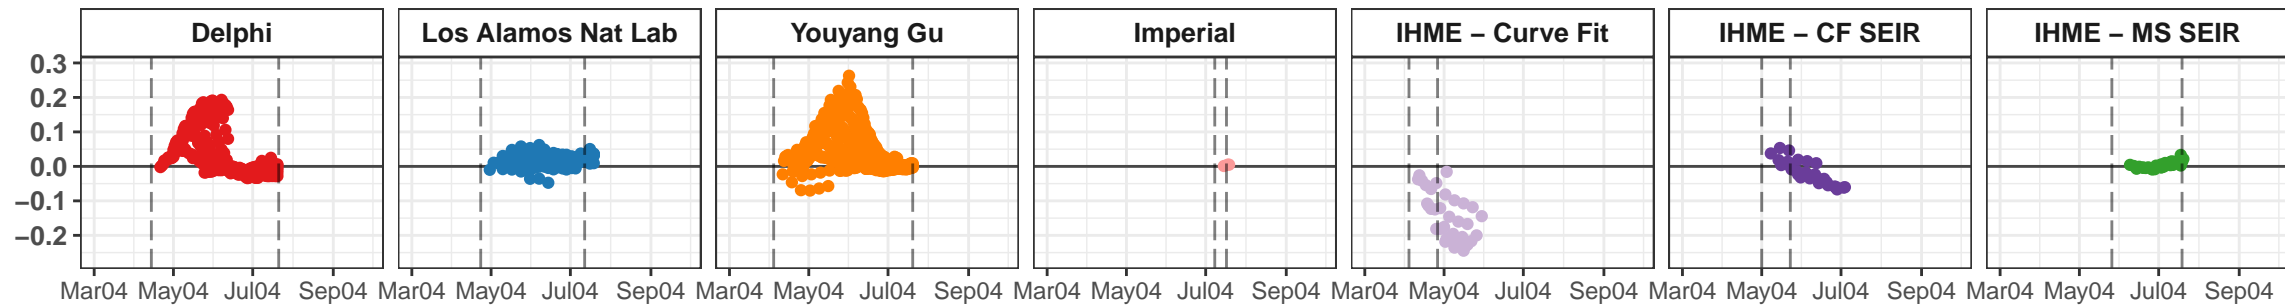

# Nevada

## Current Forecast

Delphi Los Alamos Nat Lab Youyang Gu IHME - MS SEIR JHU NYT

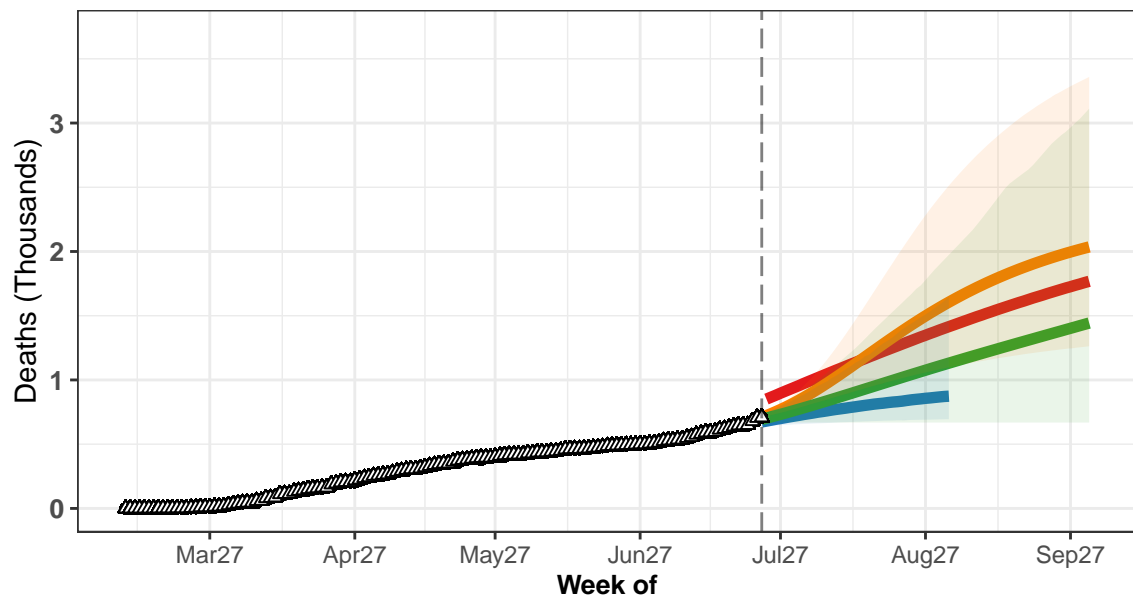

## Cumulative Out-Of-Sample Error (Post Intercept Shift)

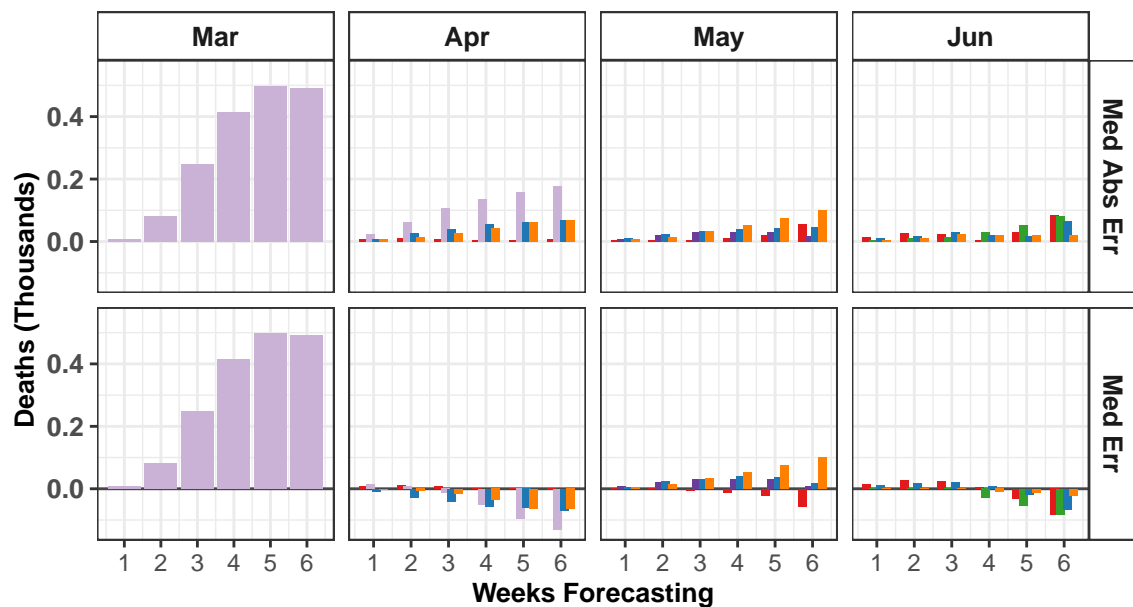

## All Model Versions

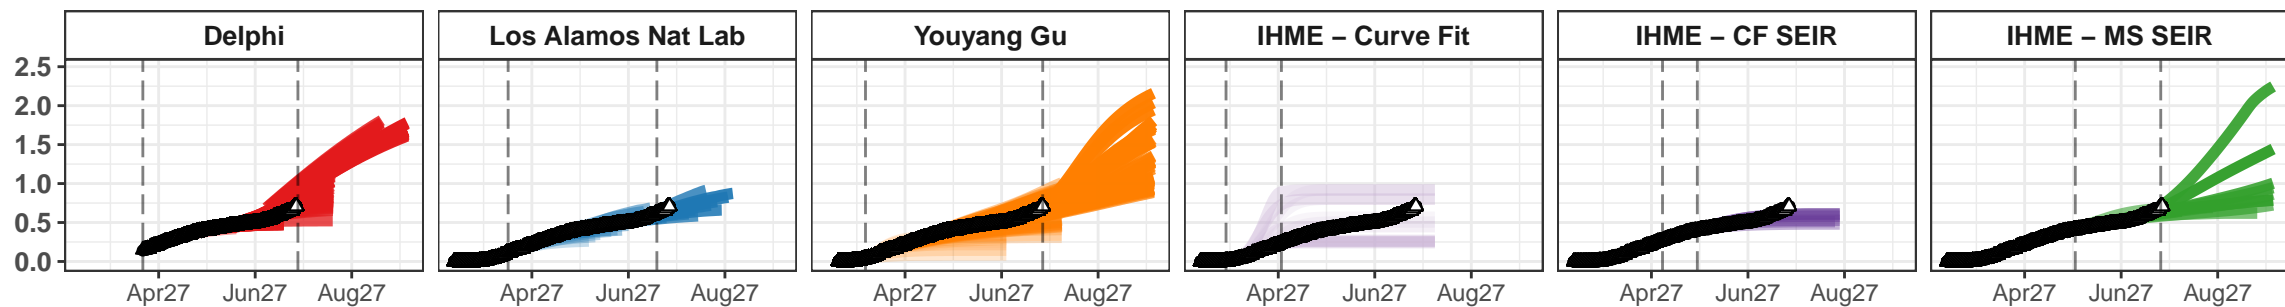

## All Cumulative Errors

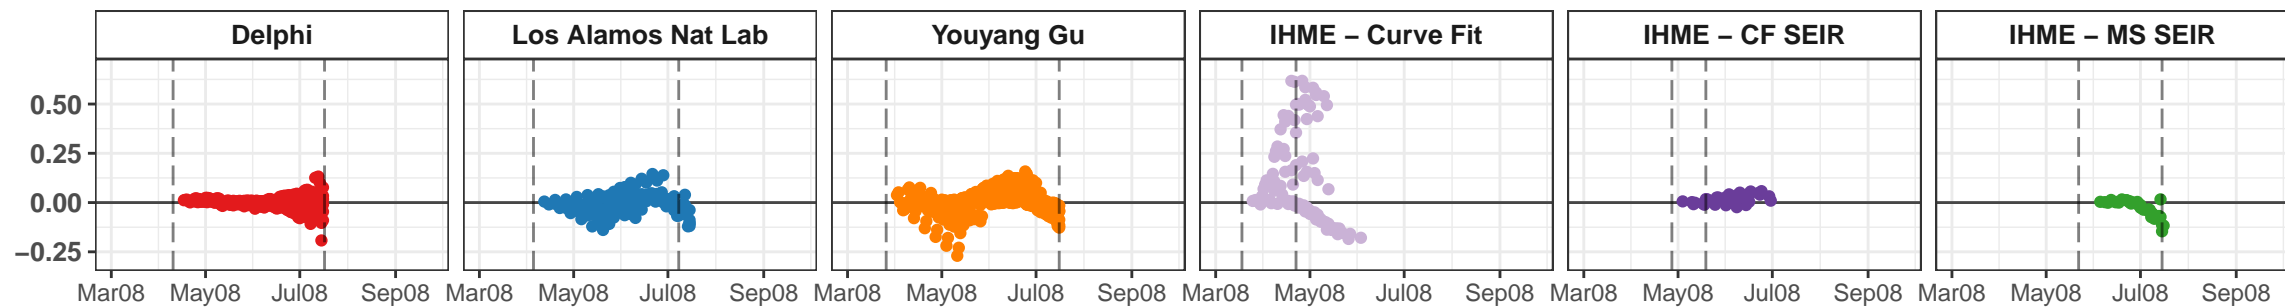



# Sudan

## Current Forecast

Delphi Los Alamos Nat Lab Imperial IHME – MS SEIR

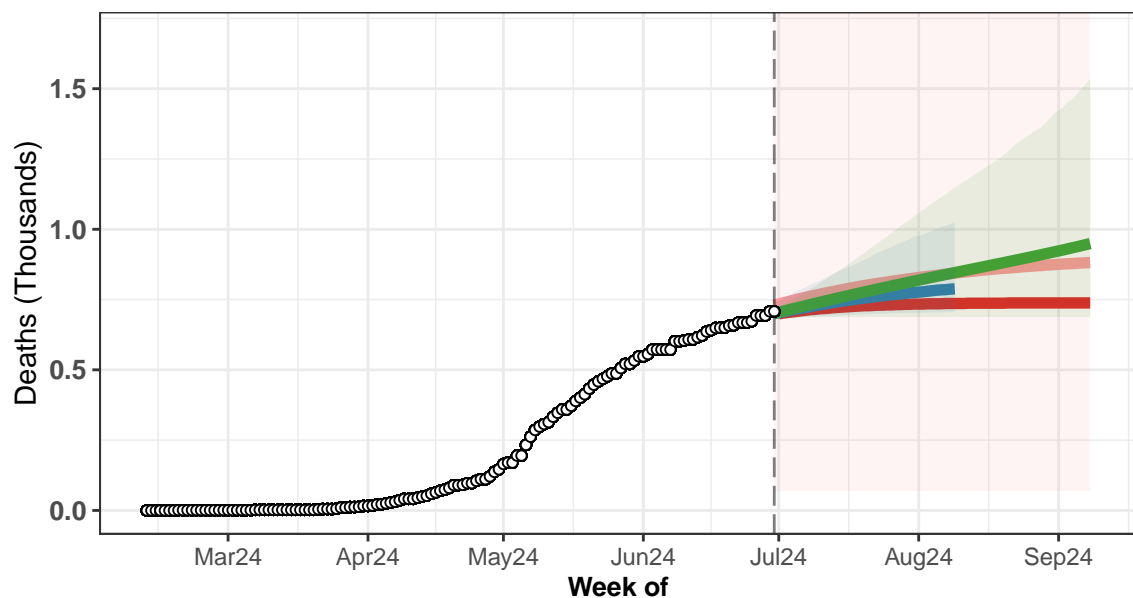

## Cumulative Out-Of-Sample Error (Post Intercept Shift)

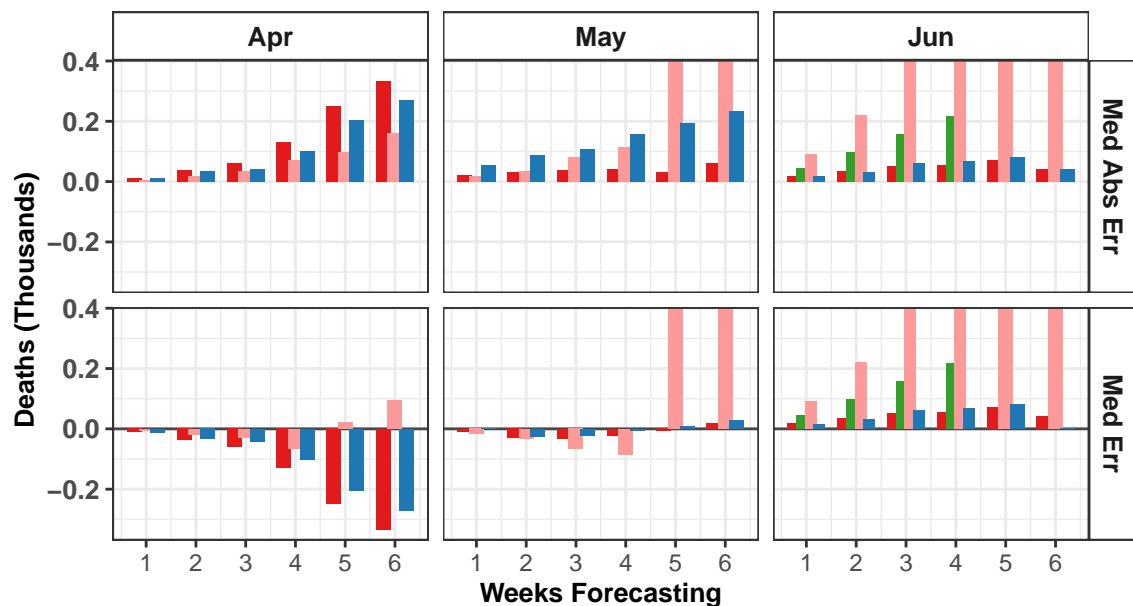

## All Model Versions

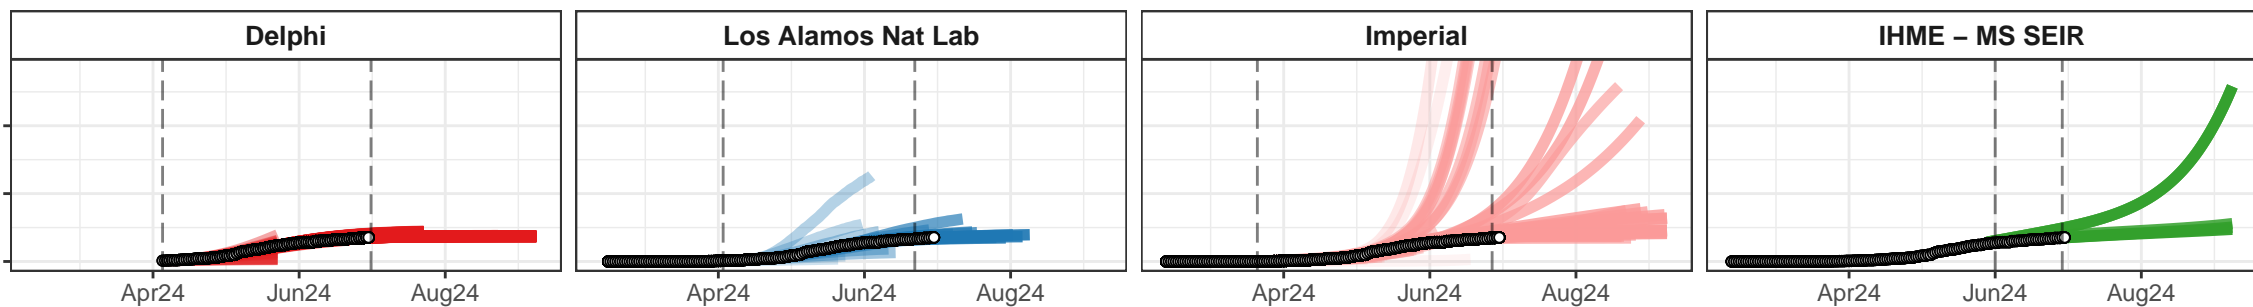

## All Cumulative Errors

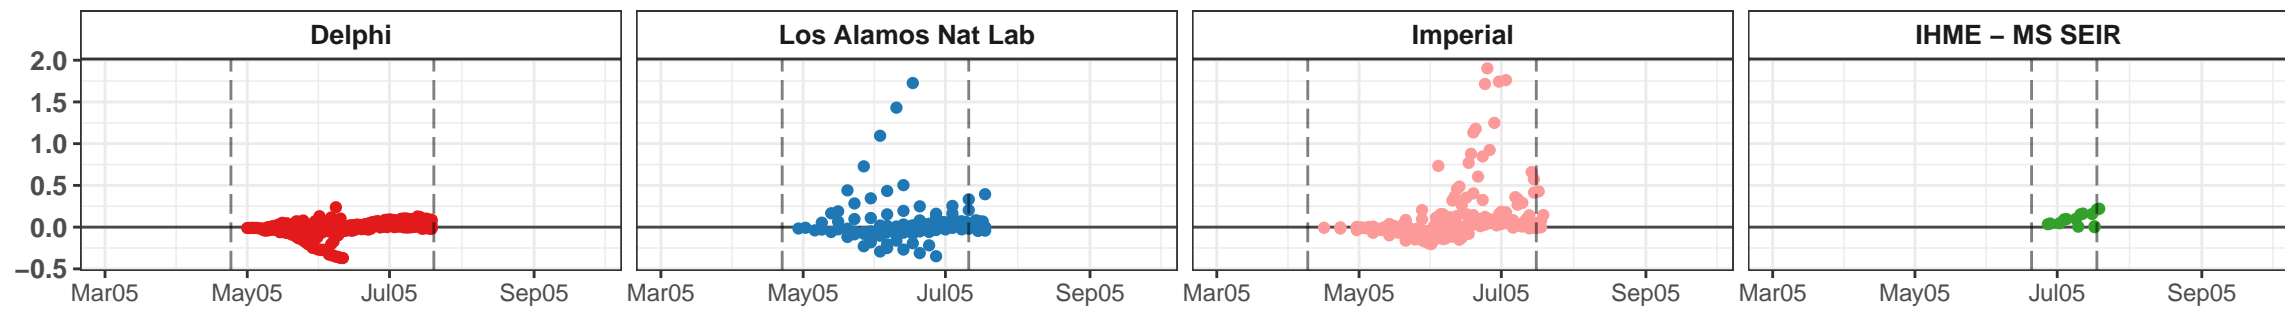

# Kentucky

## Current Forecast

Delphi Los Alamos Nat Lab Youyang Gu IHME - MS SEIR ○ JHU △ NYT

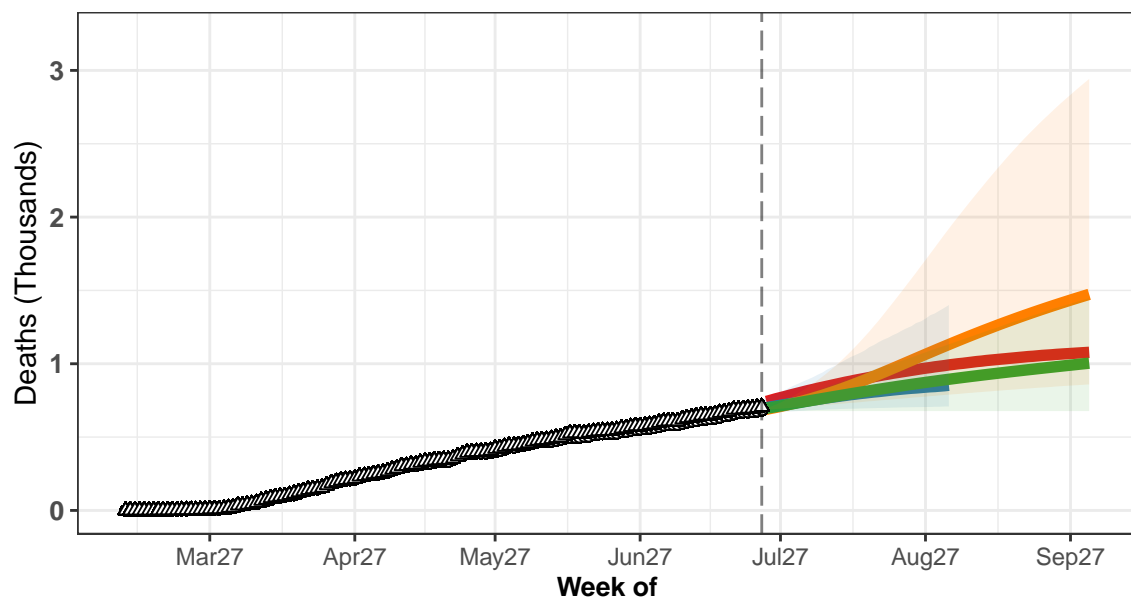

## Cumulative Out-Of-Sample Error (Post Intercept Shift)

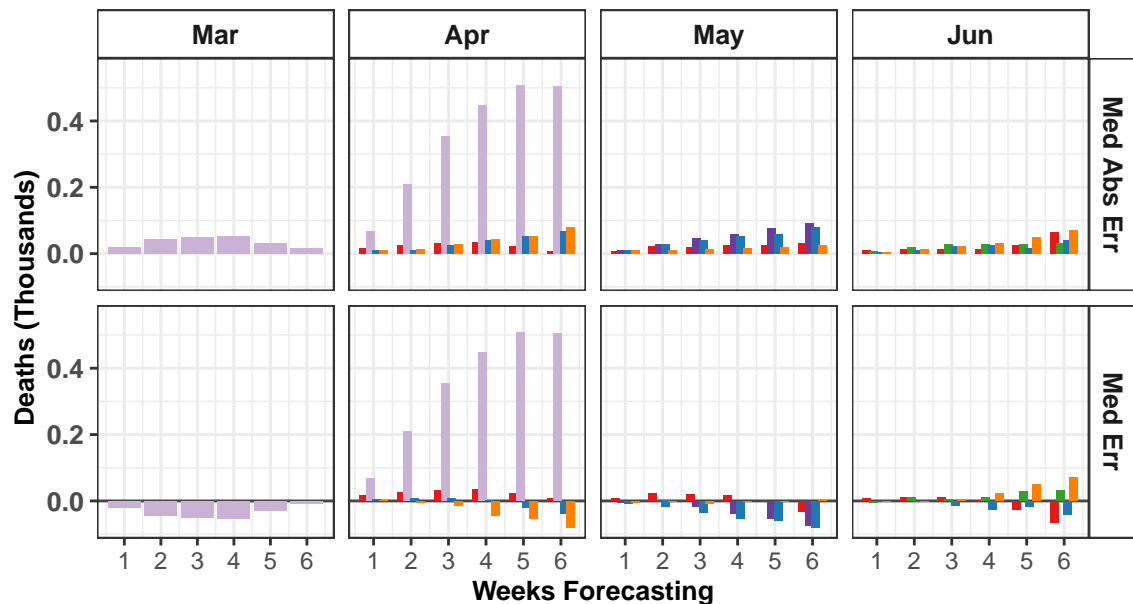

## All Model Versions

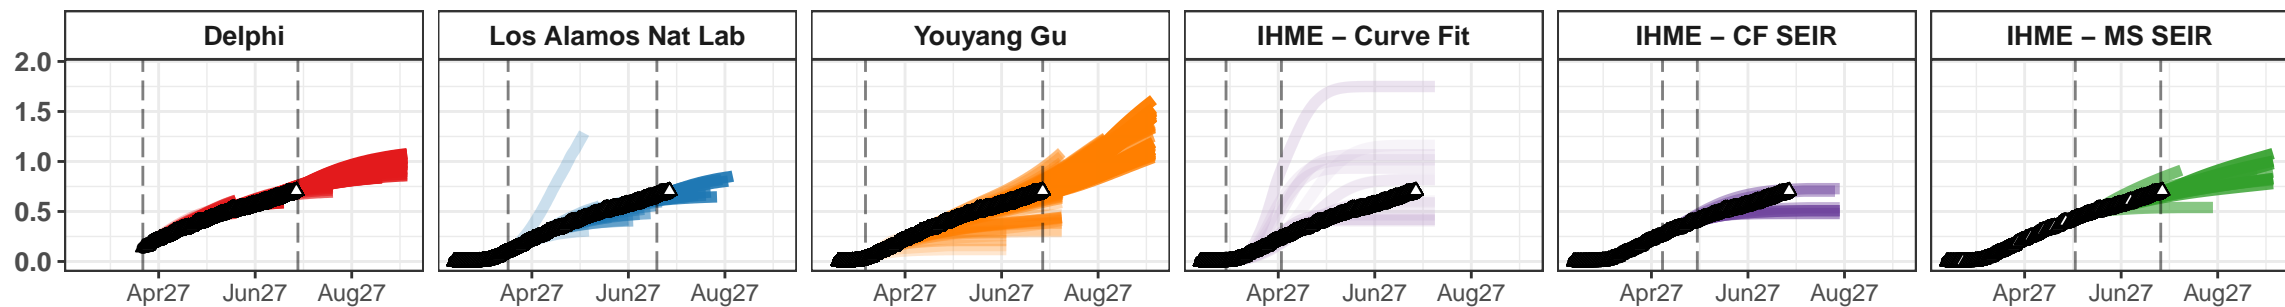

## All Cumulative Errors

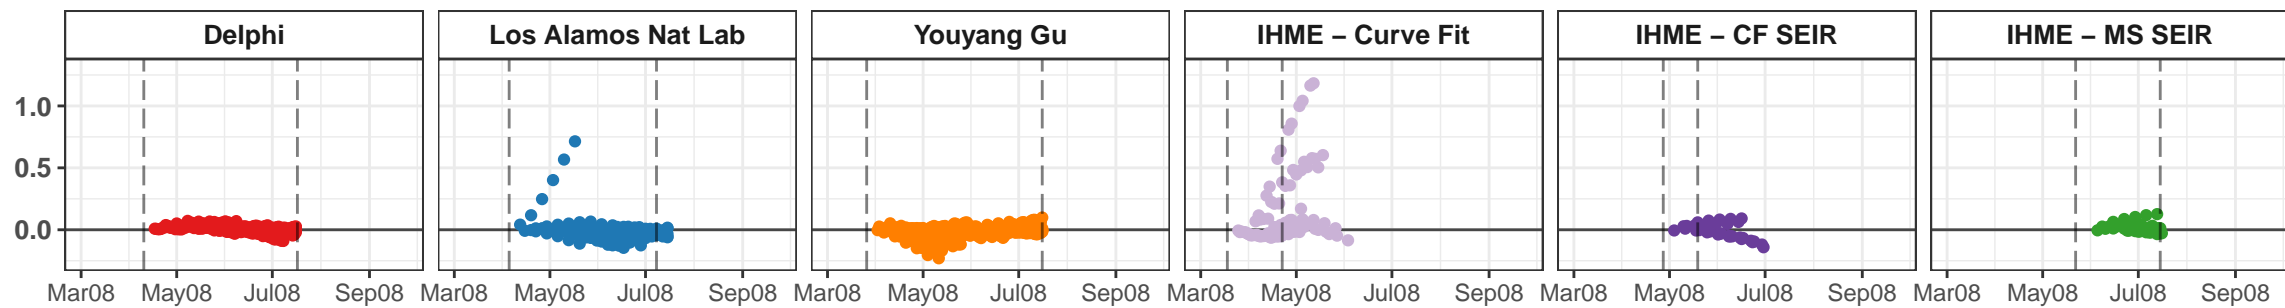

# Armenia

## Current Forecast

Delphi Los Alamos Nat Lab Imperial IHME – MS SEIR

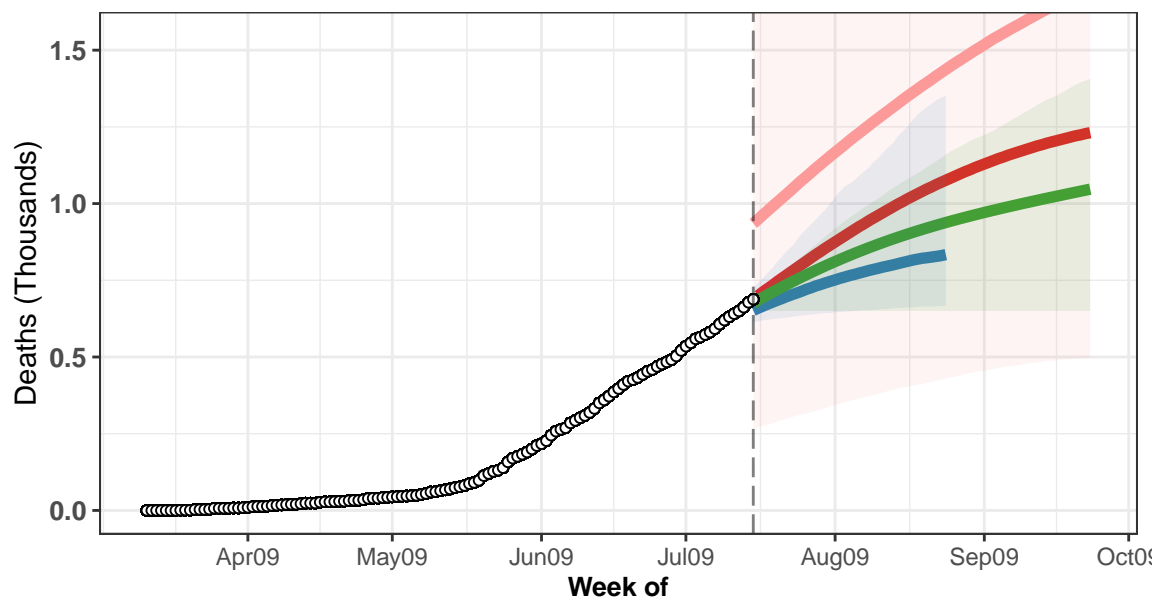

## Cumulative Out-Of-Sample Error (Post Intercept Shift)

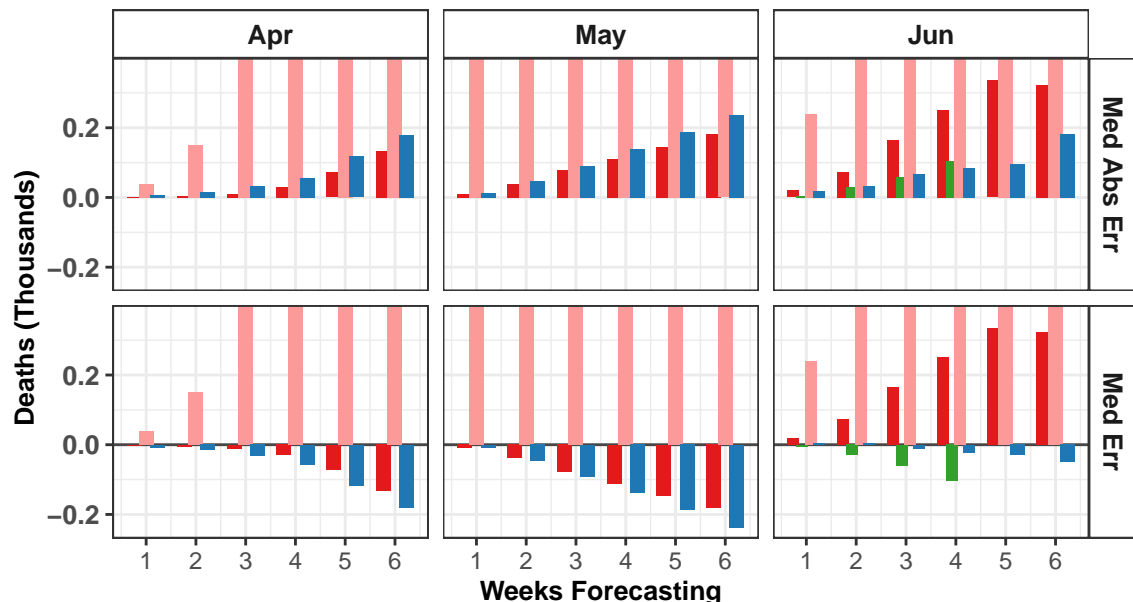

## All Model Versions

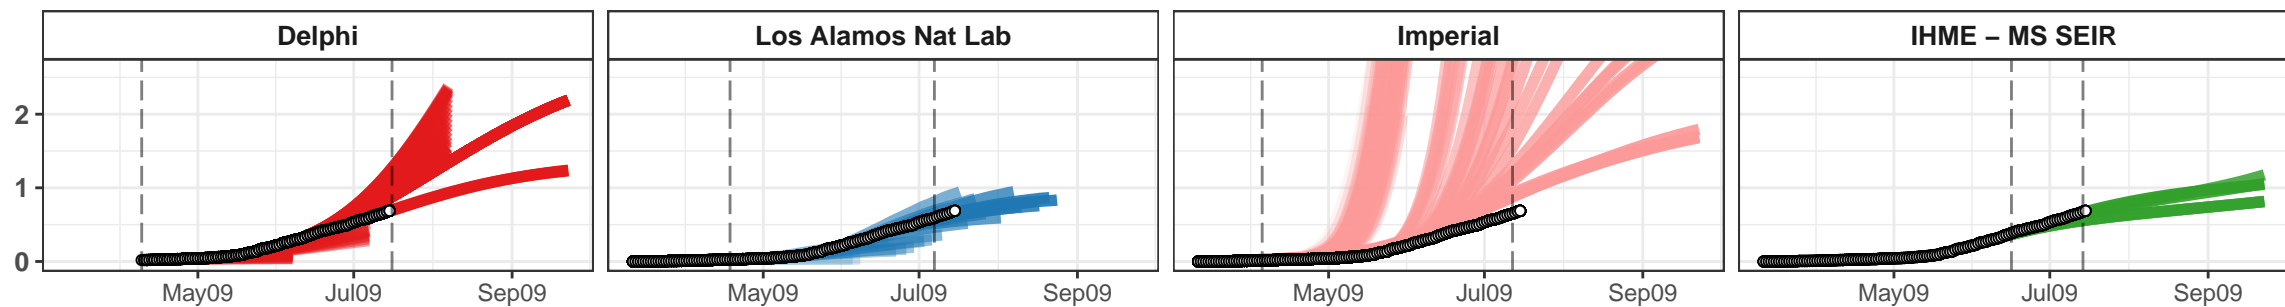

## All Cumulative Errors

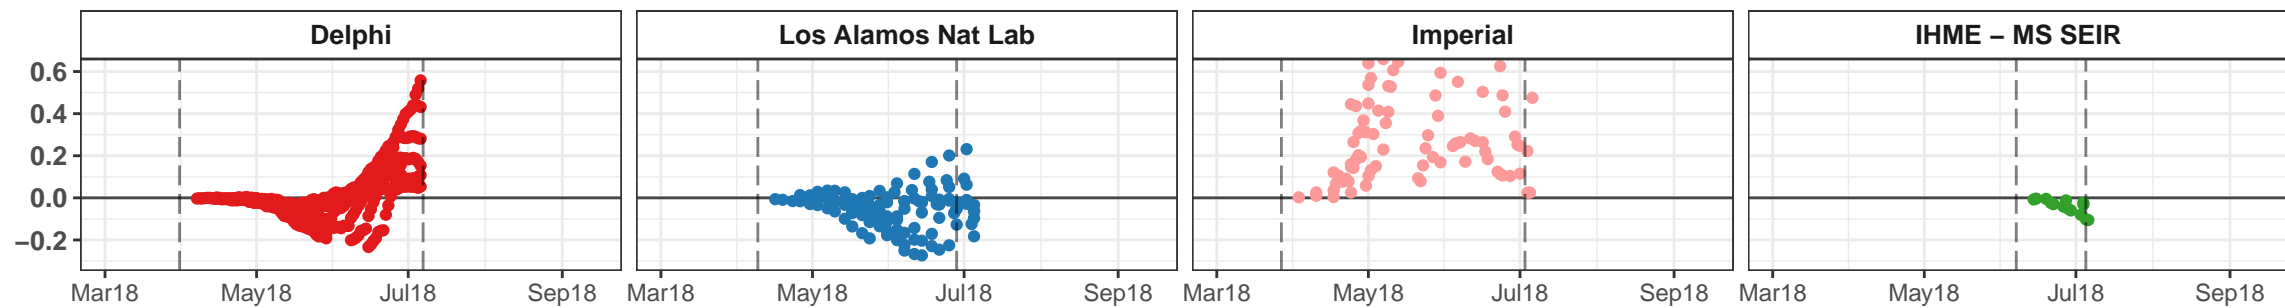

# Denmark

## Current Forecast

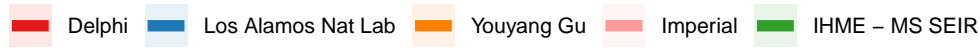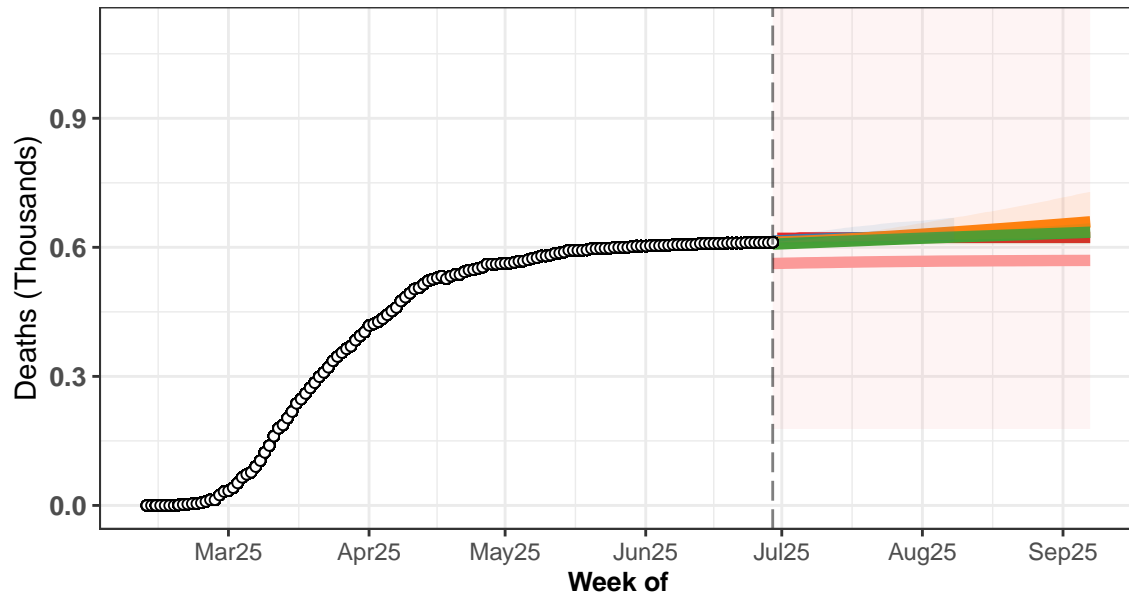

## Cumulative Out-Of-Sample Error (Post Intercept Shift)

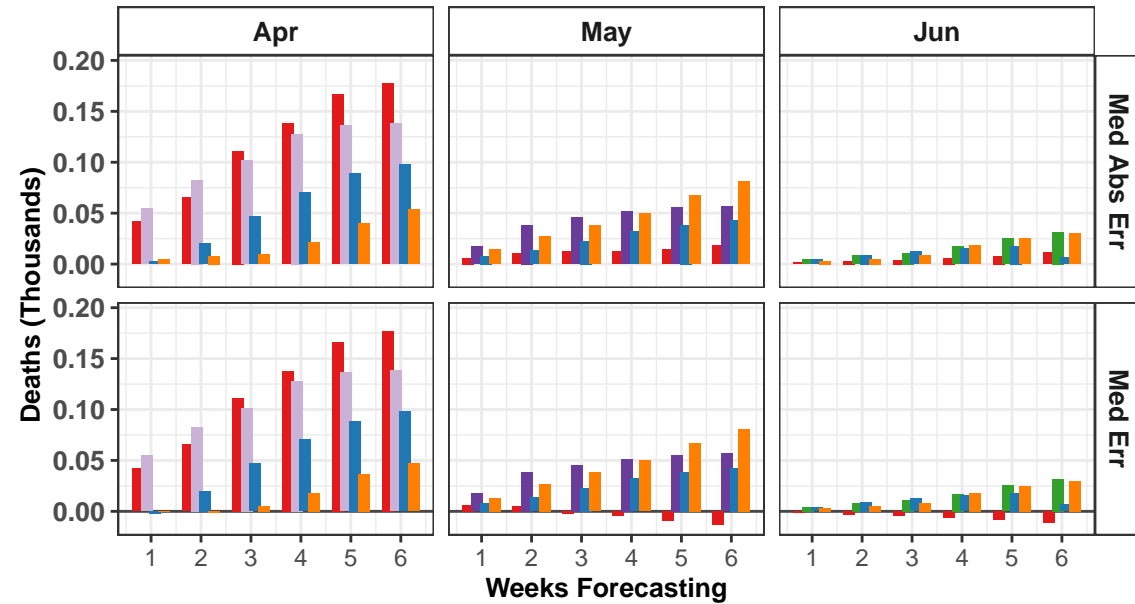

## All Model Versions

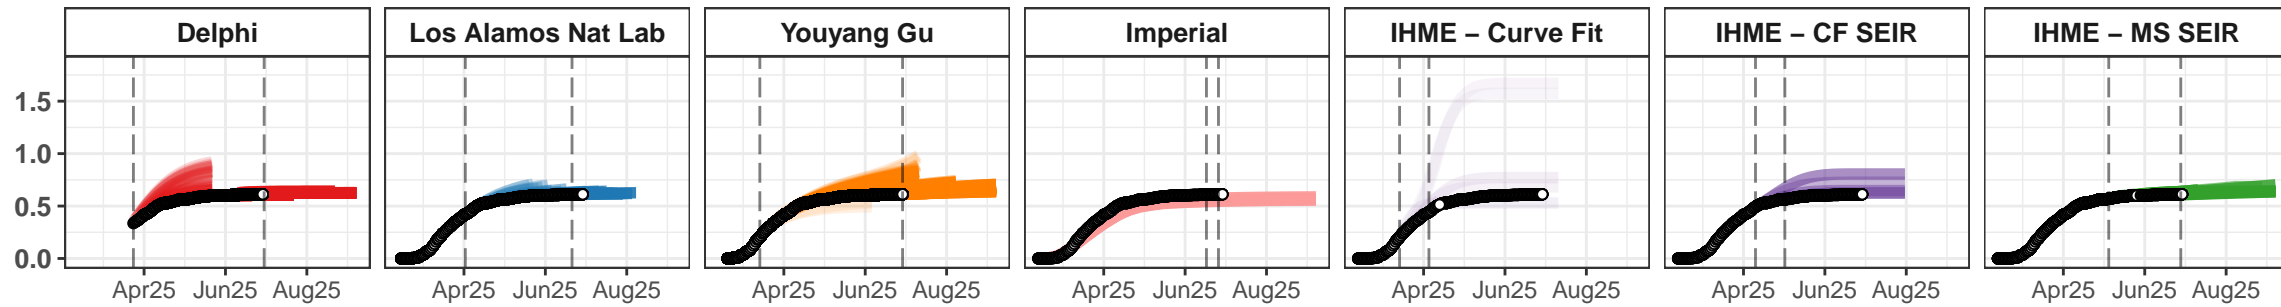

## All Cumulative Errors

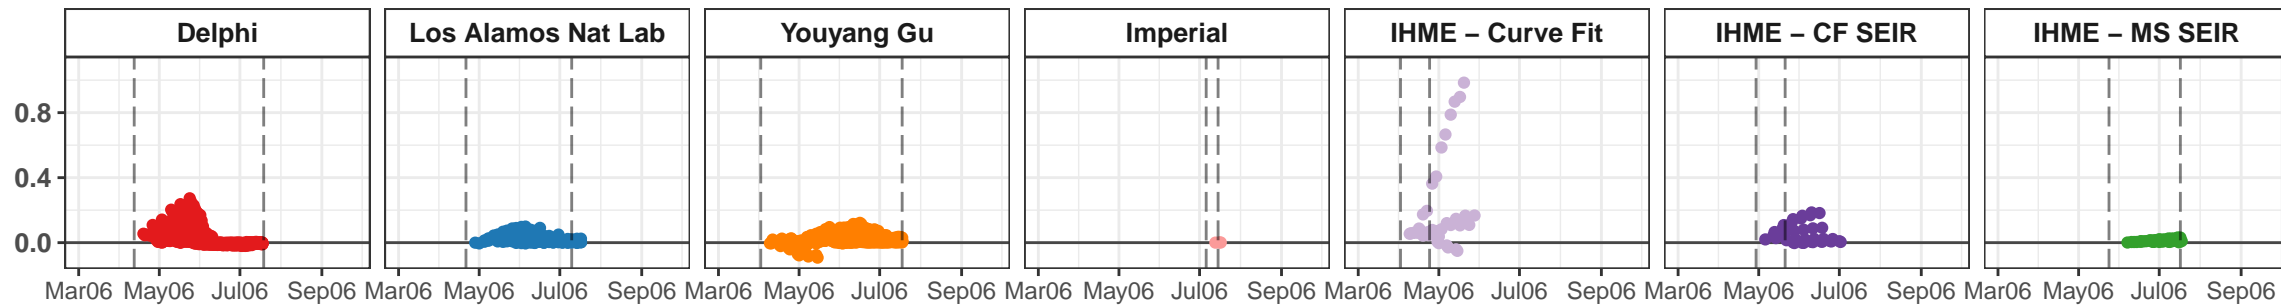

# Hungary

## Current Forecast

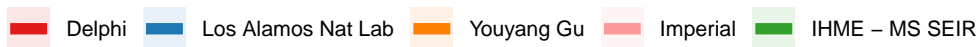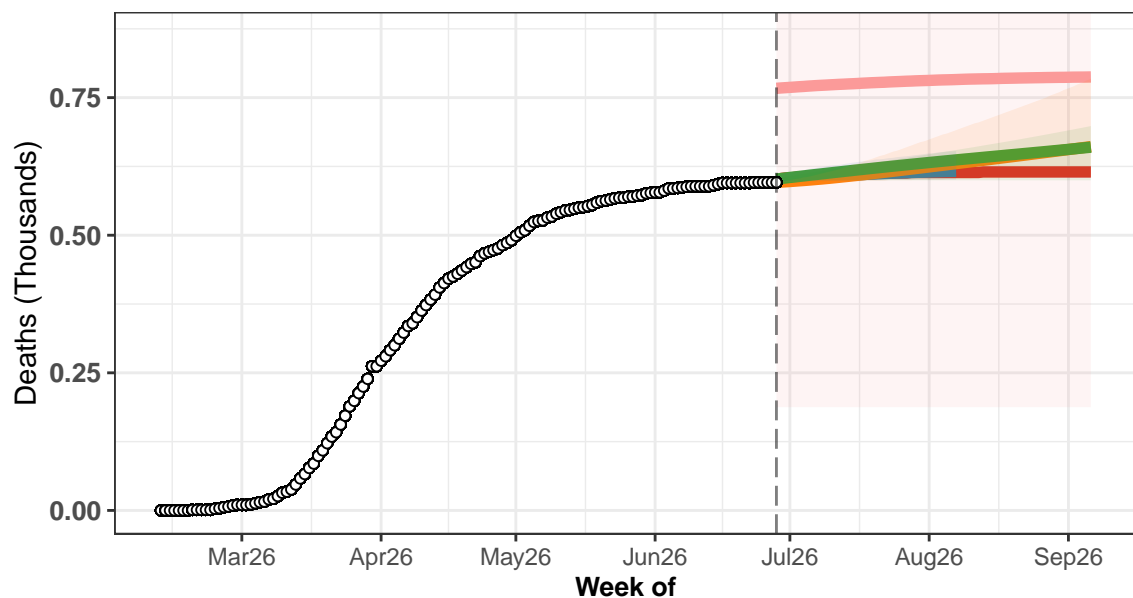

## Cumulative Out-Of-Sample Error (Post Intercept Shift)

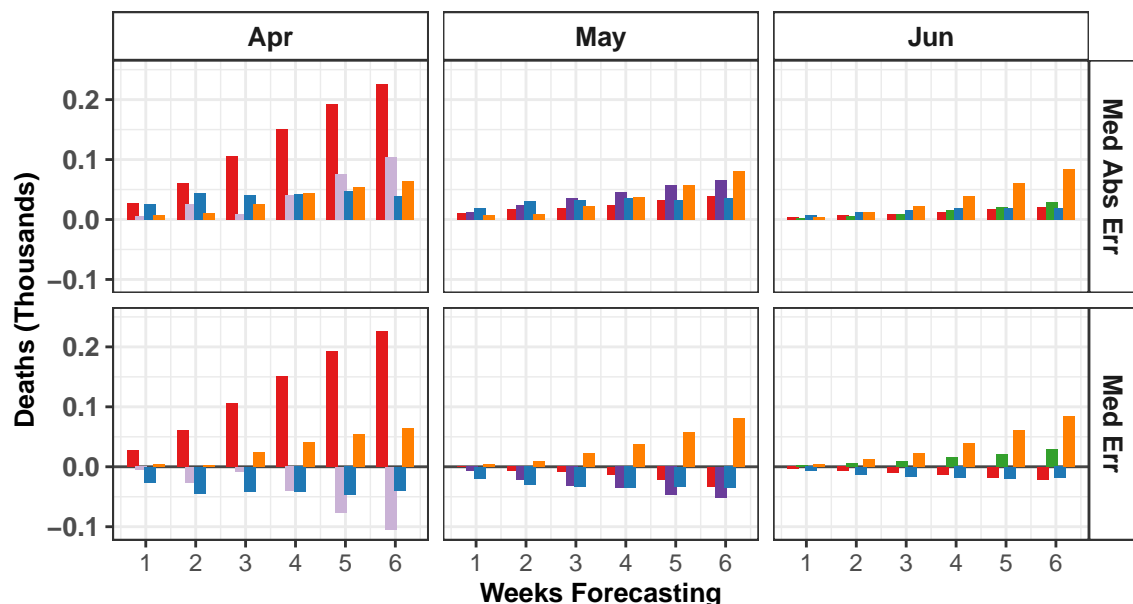

## All Model Versions

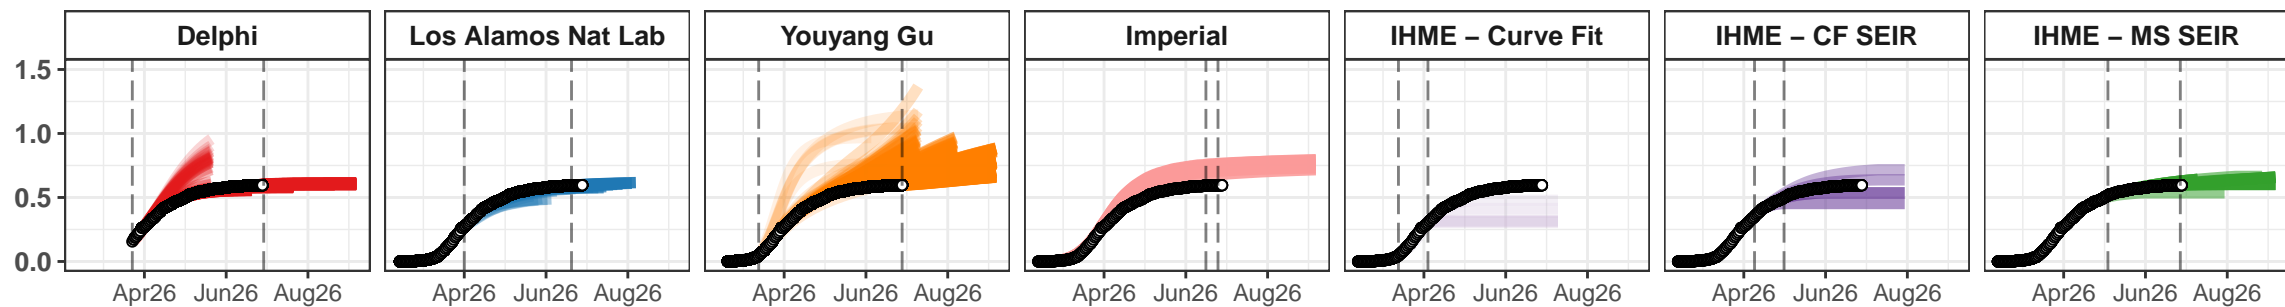

## All Cumulative Errors

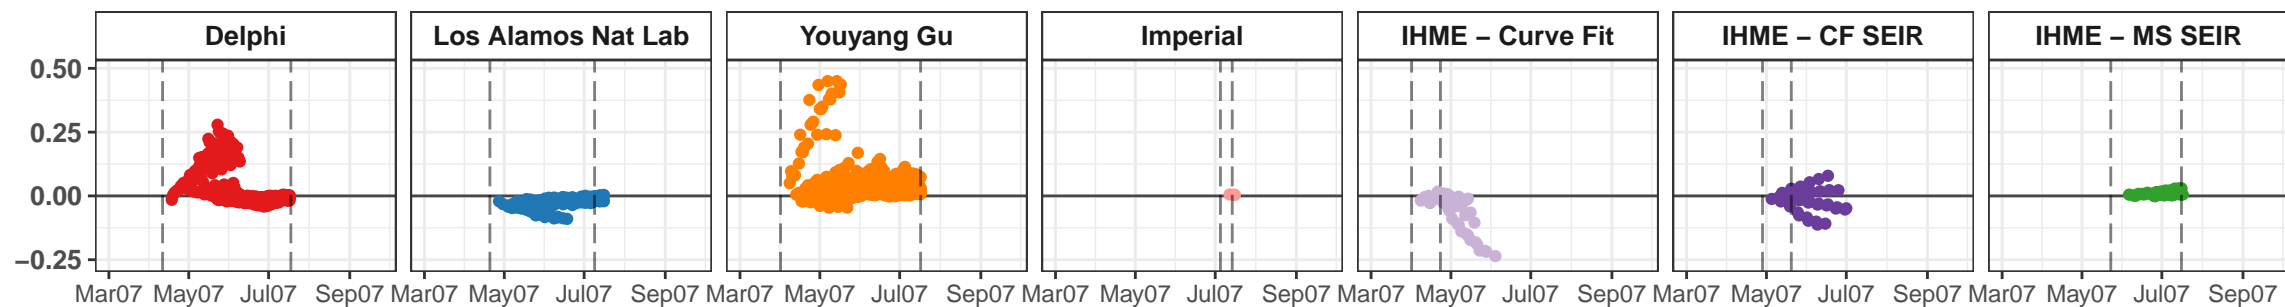

# New Mexico

## Current Forecast

Delphi Los Alamos Nat Lab Youyang Gu IHME – MS SEIR ○ JHU △ NYT

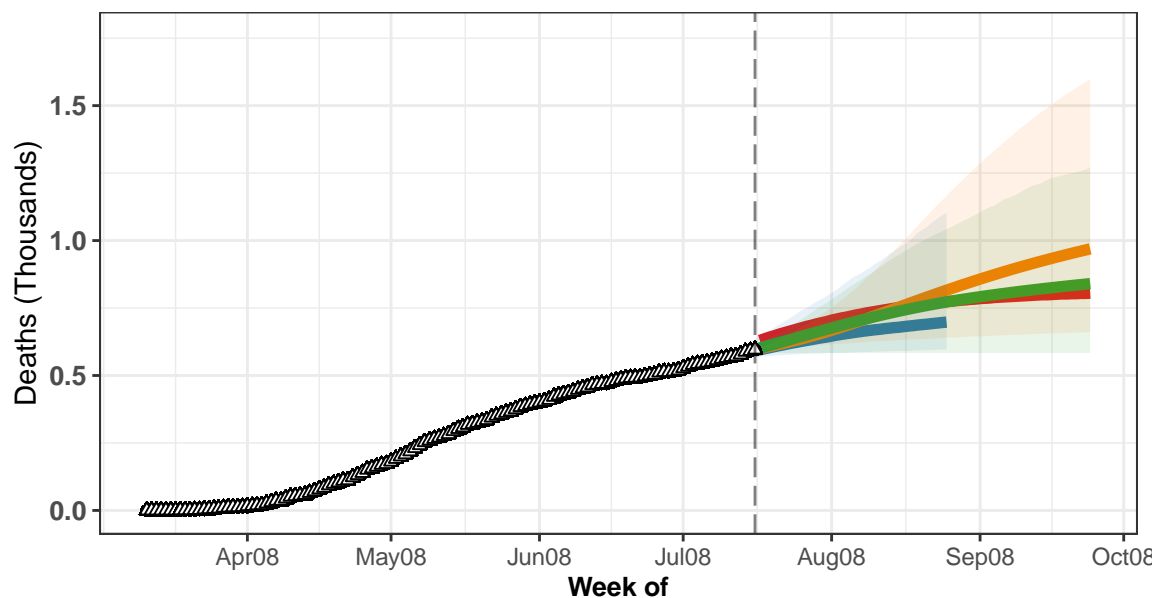

## Cumulative Out-Of-Sample Error (Post Intercept Shift)

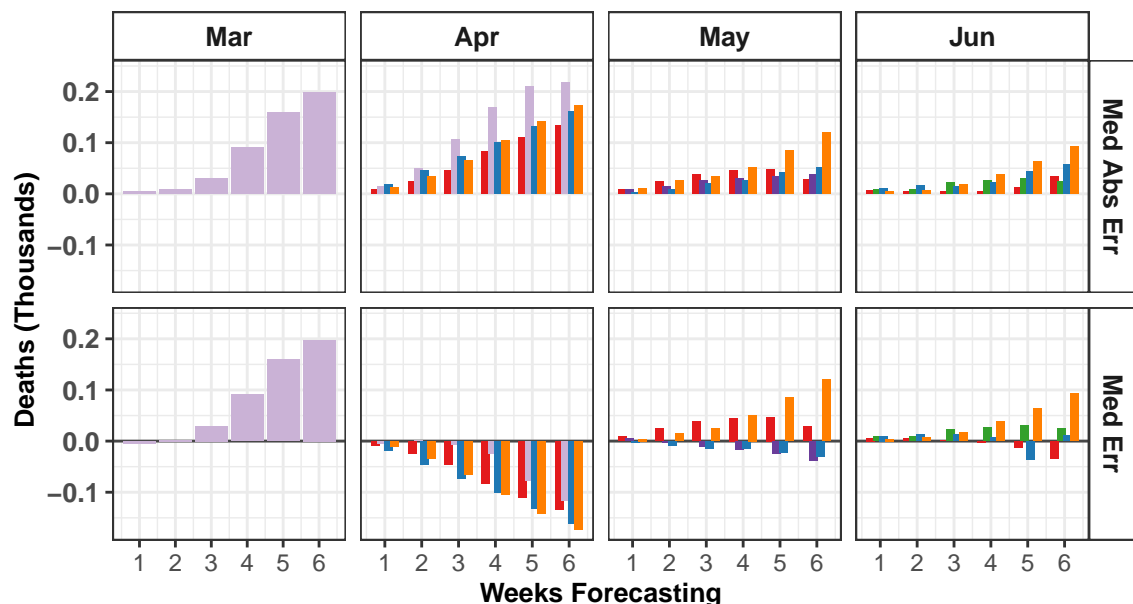

## All Model Versions

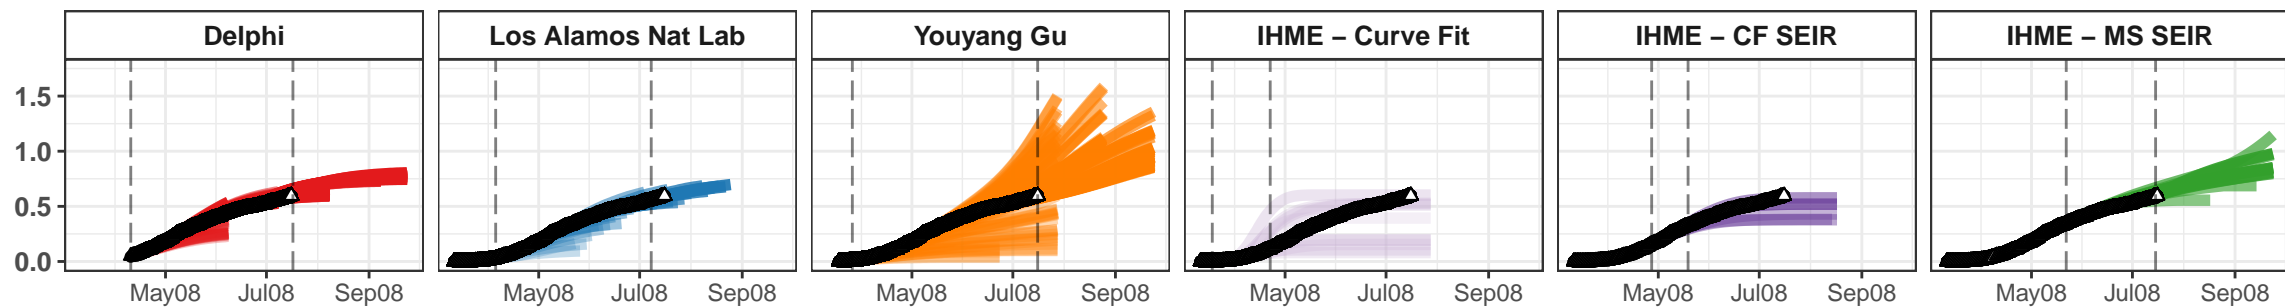

## All Cumulative Errors

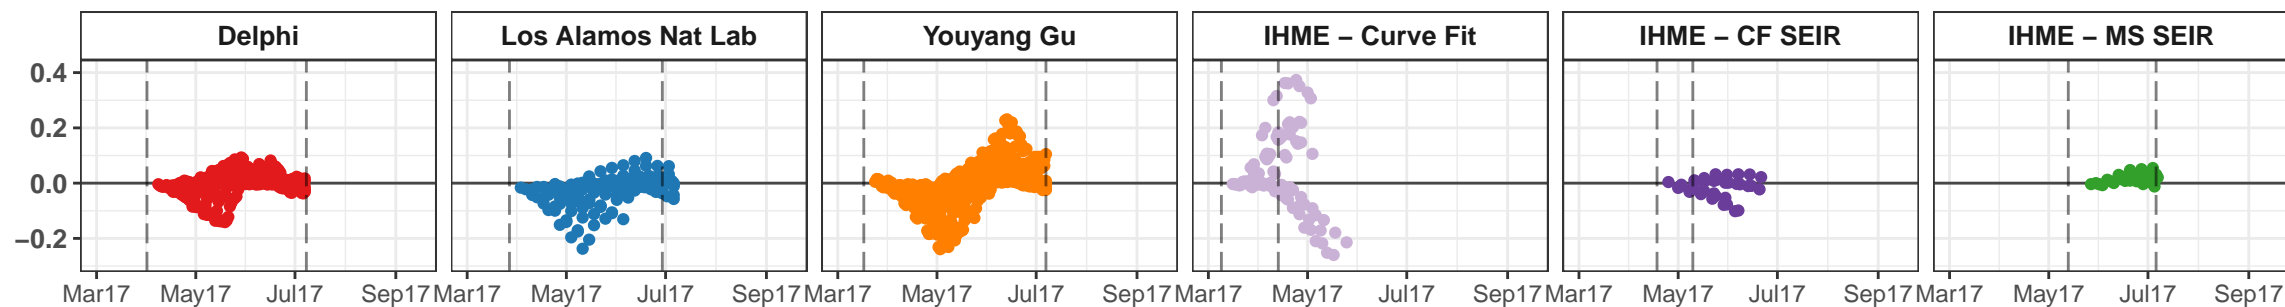

# Kazakhstan

## Current Forecast

Delphi Los Alamos Nat Lab Imperial IHME – MS SEIR

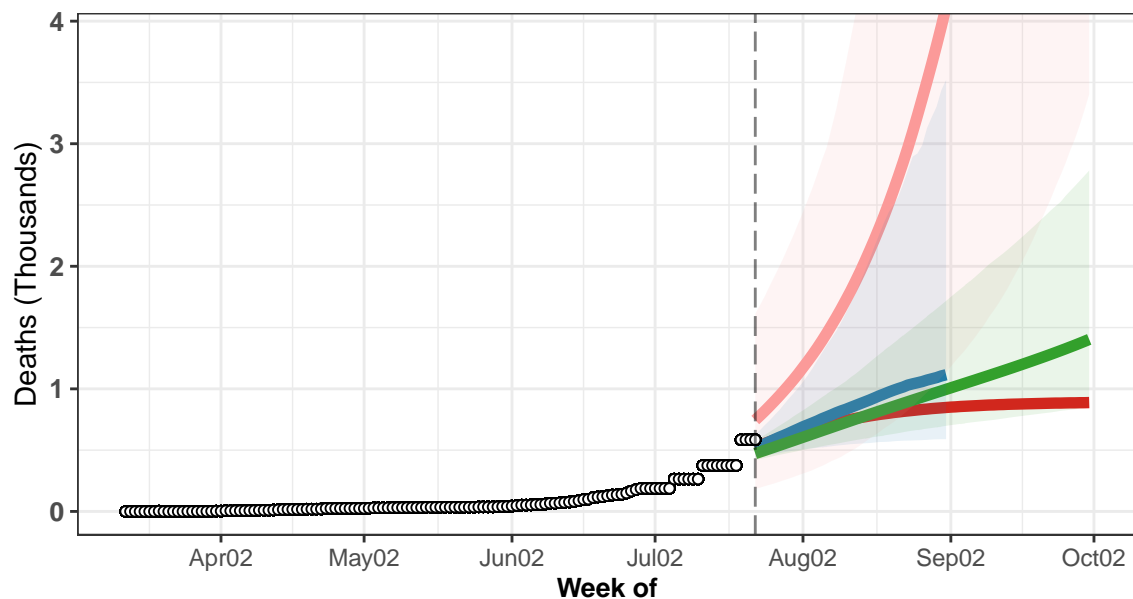

## Cumulative Out-Of-Sample Error (Post Intercept Shift)

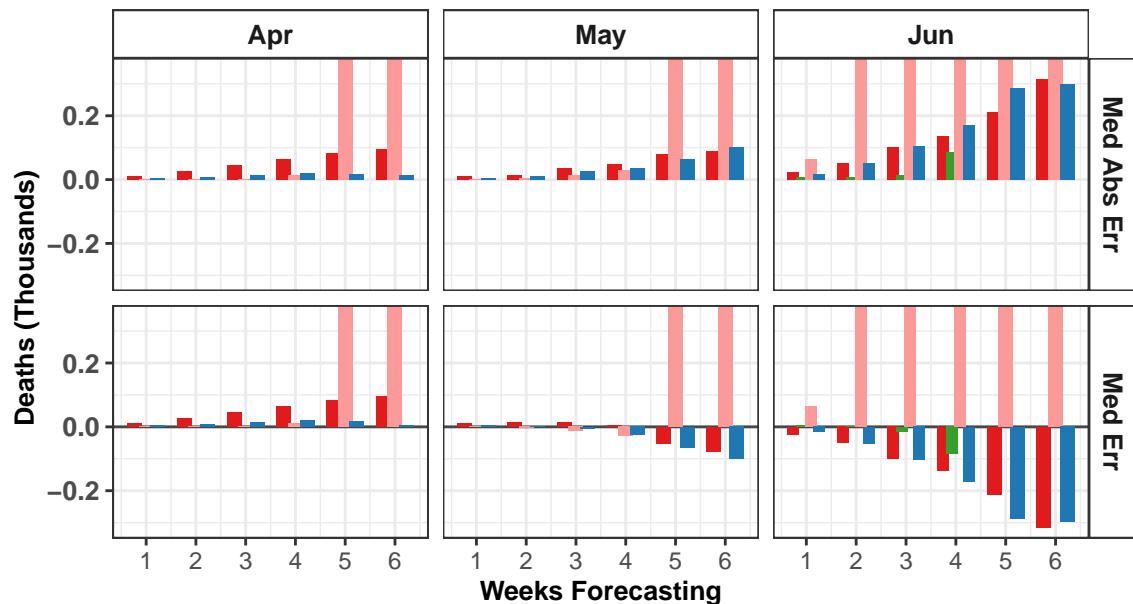

## All Model Versions

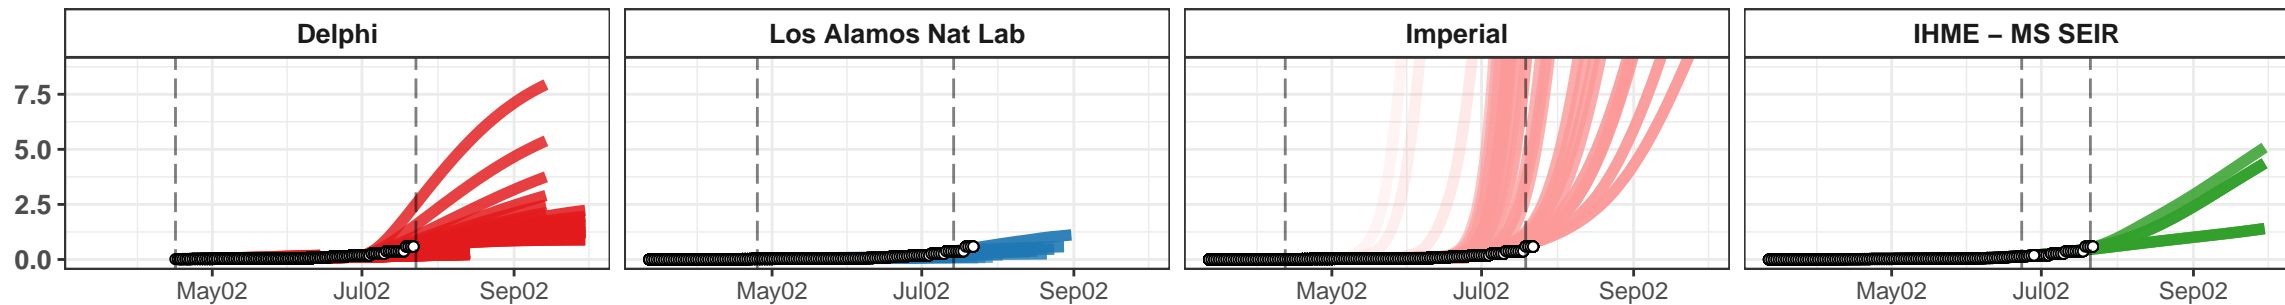

## All Cumulative Errors

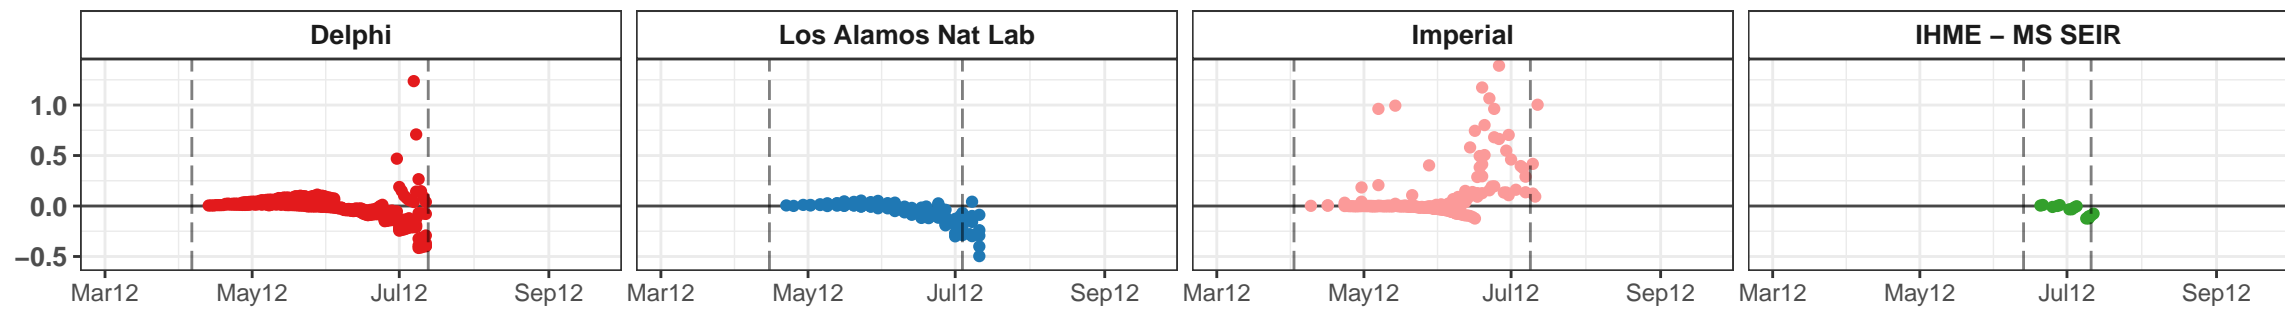

# District of Columbia

## Current Forecast

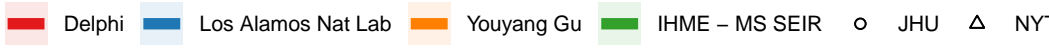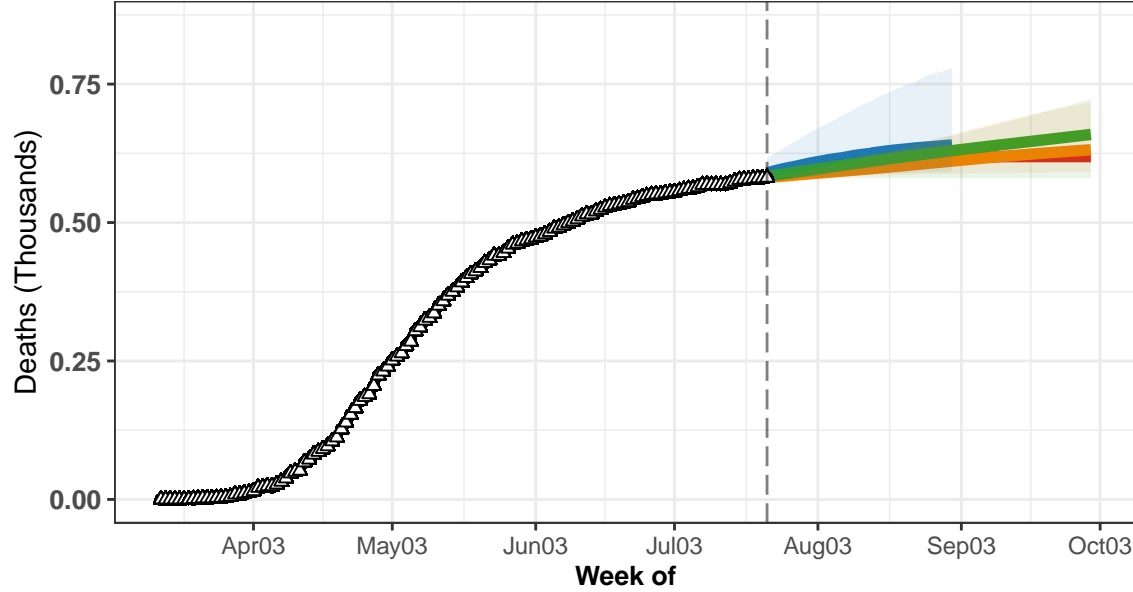

## Cumulative Out-Of-Sample Error (Post Intercept Shift)

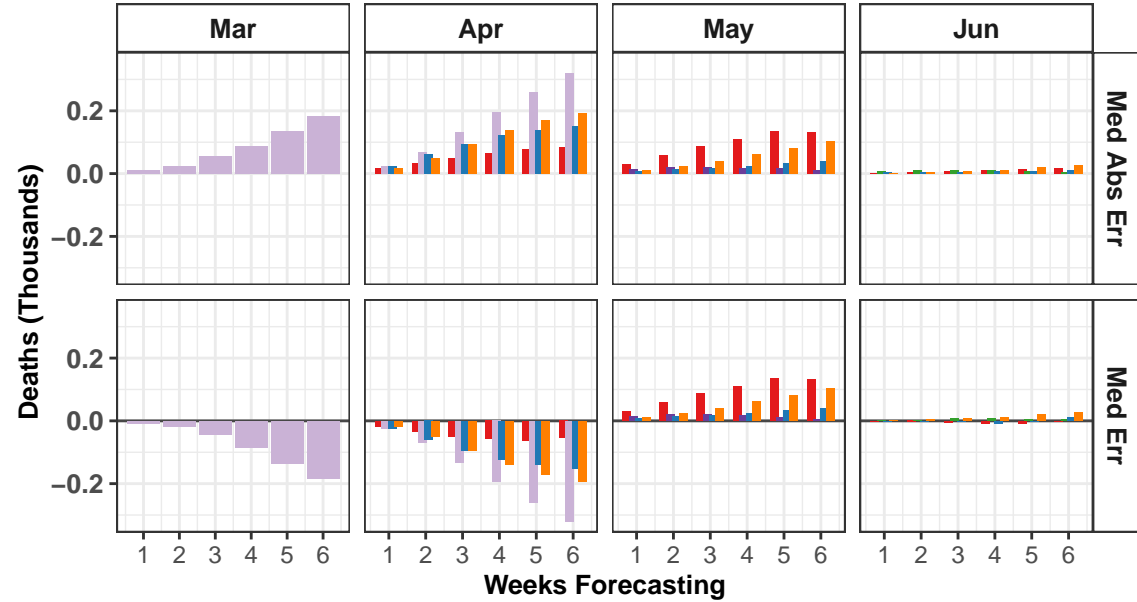

## All Model Versions

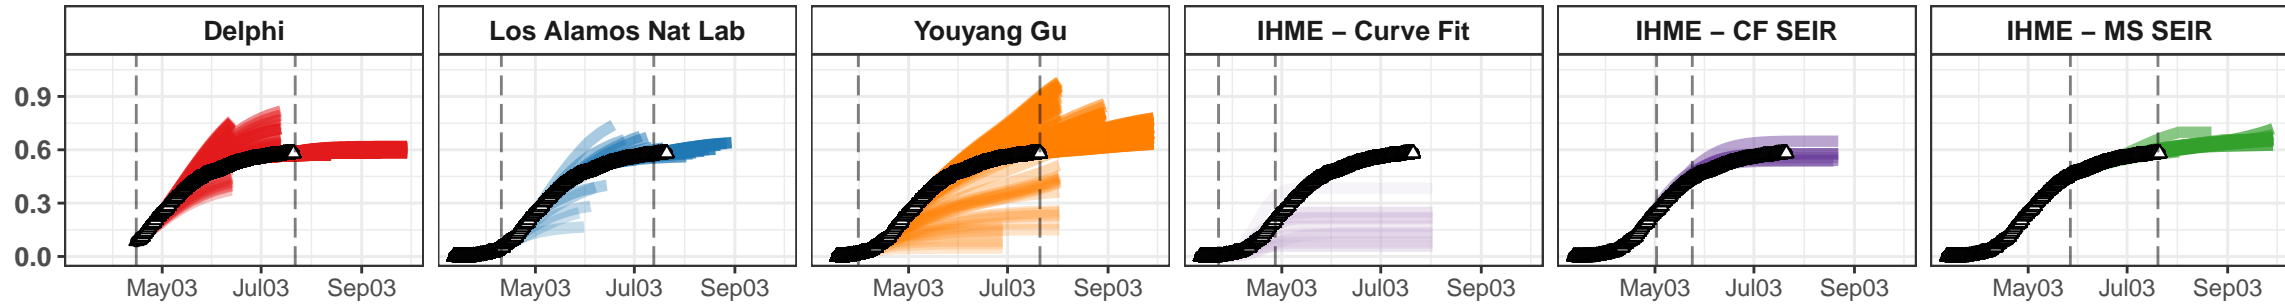

## All Cumulative Errors

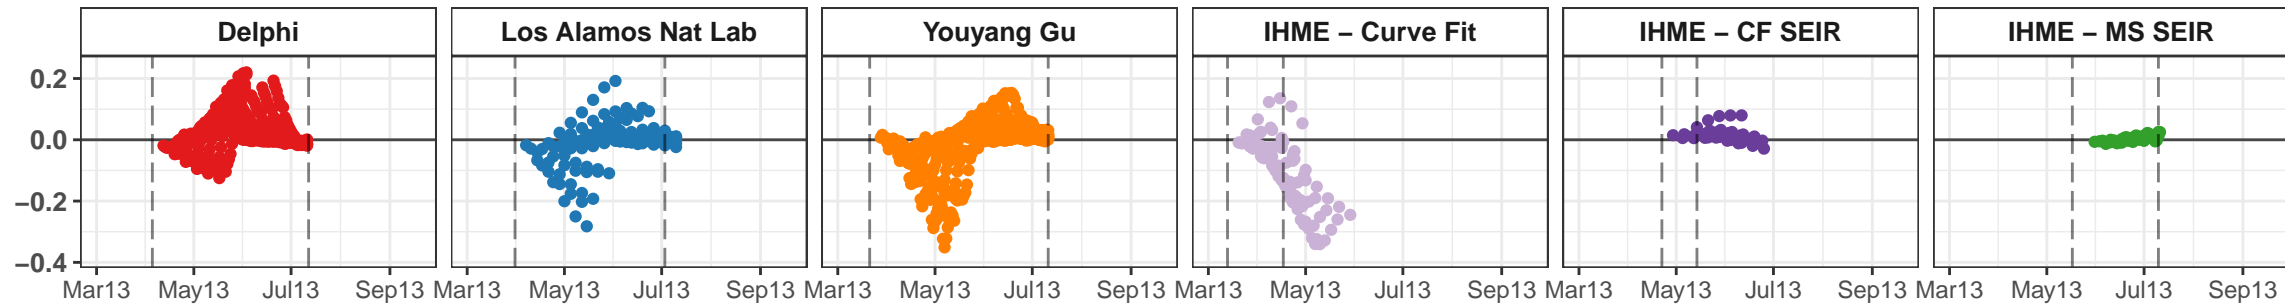



# Delaware

## Current Forecast

■ Delphi 
 ■ Los Alamos Nat Lab 
 ■ Youyang Gu 
 ■ IHME - MS SEIR 
 ○ JHU 
 △ NY

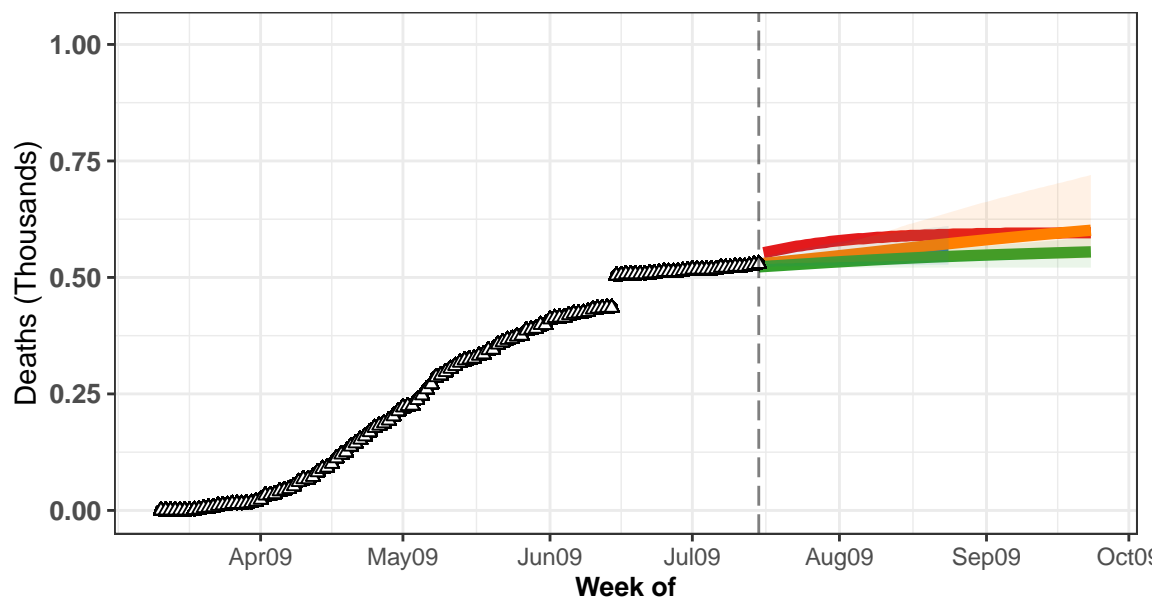

## Cumulative Out-Of-Sample Error (Post Intercept Shift)

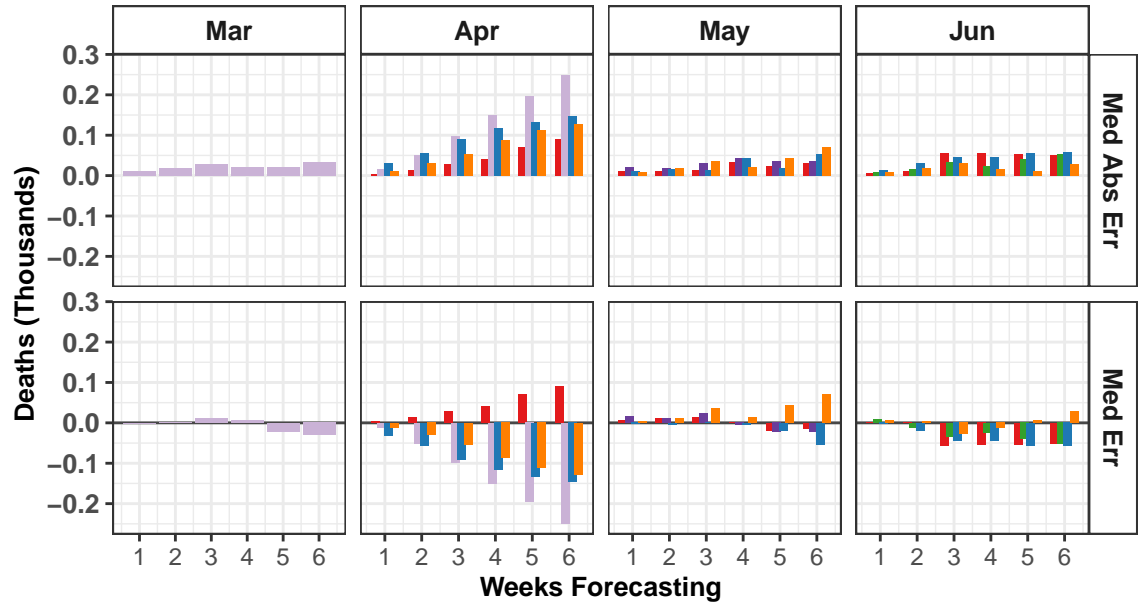

## All Model Versions

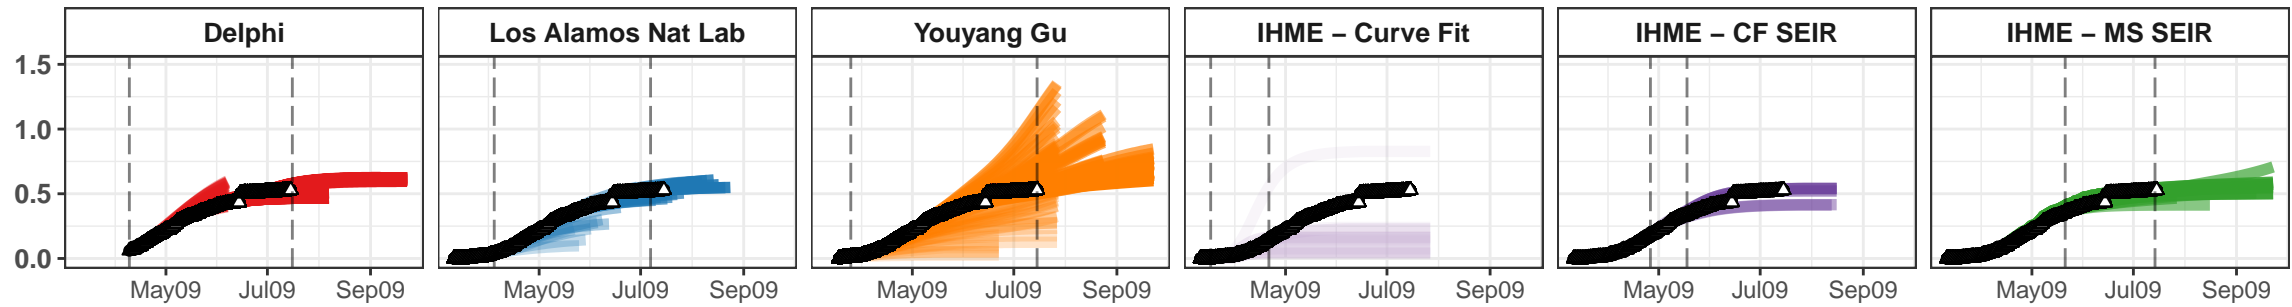

## All Cumulative Errors

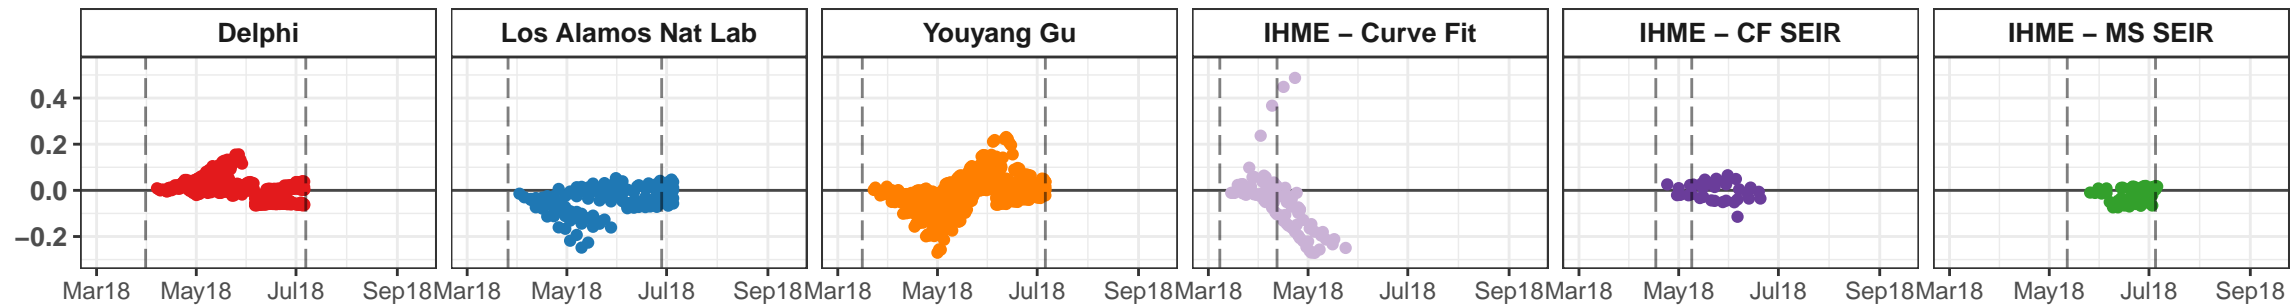

# Belarus

## Current Forecast

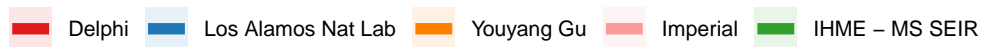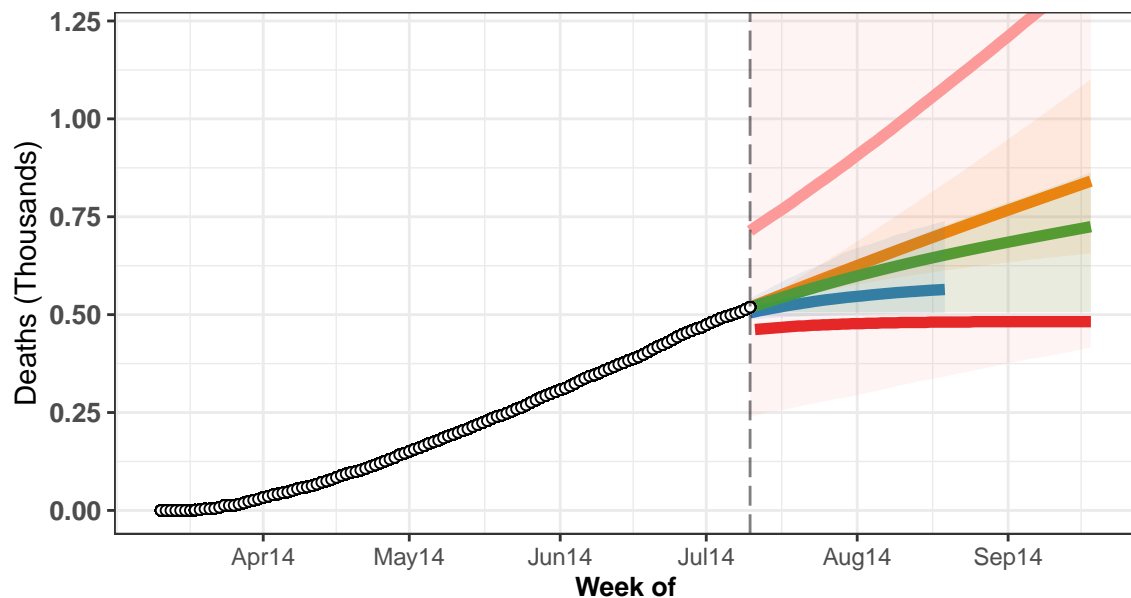

## Cumulative Out-Of-Sample Error (Post Intercept Shift)

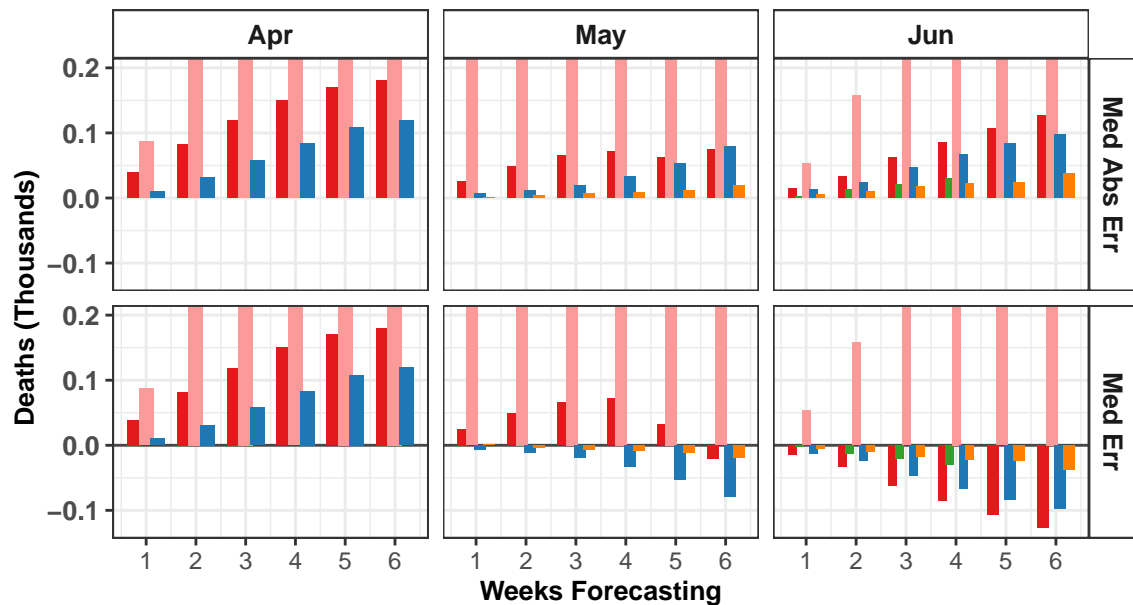

## All Model Versions

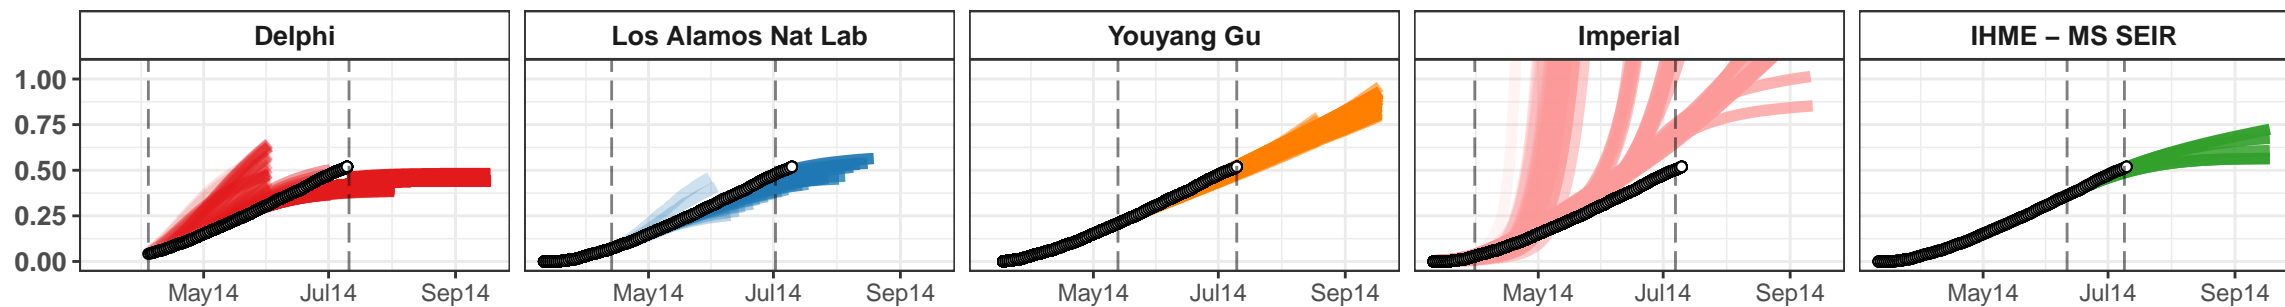

## All Cumulative Errors

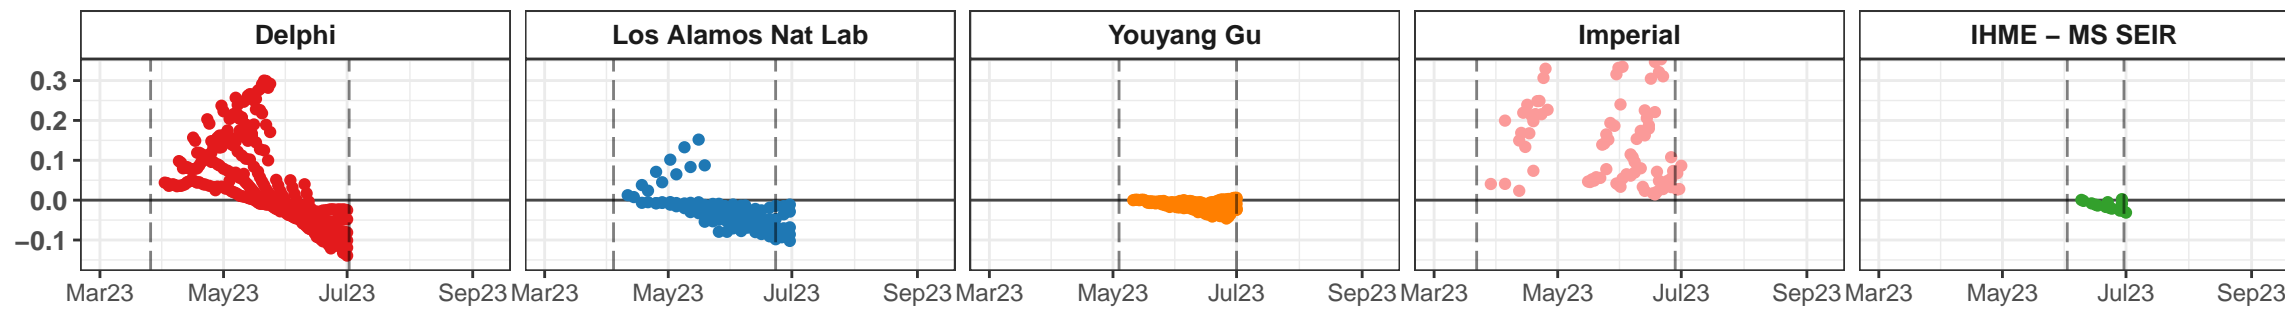

# Serbia

## Current Forecast

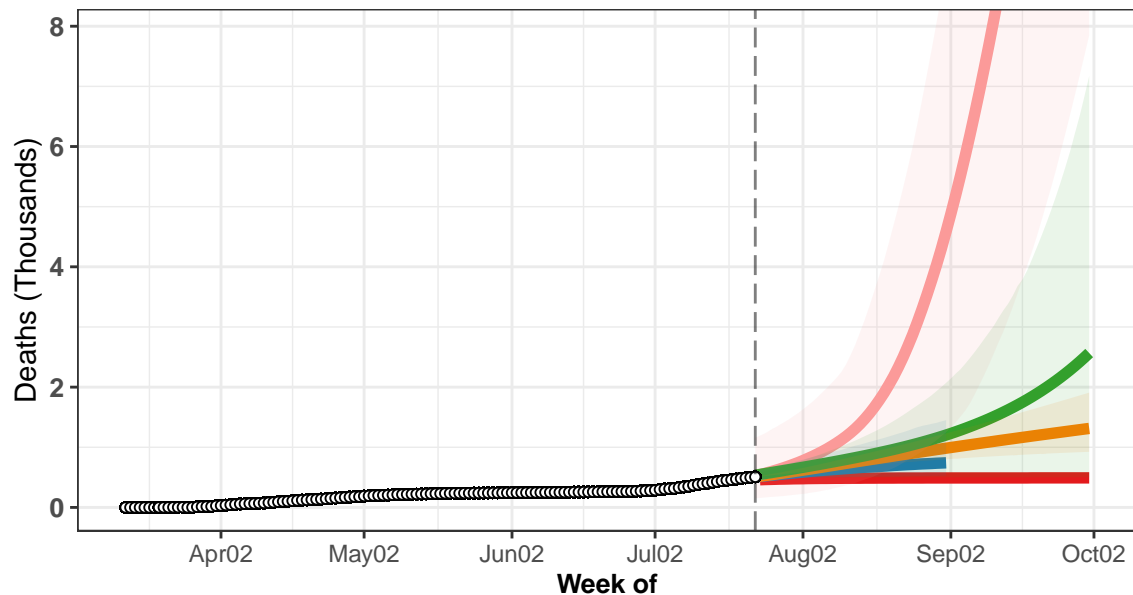

## Cumulative Out-Of-Sample Error (Post Intercept Shift)

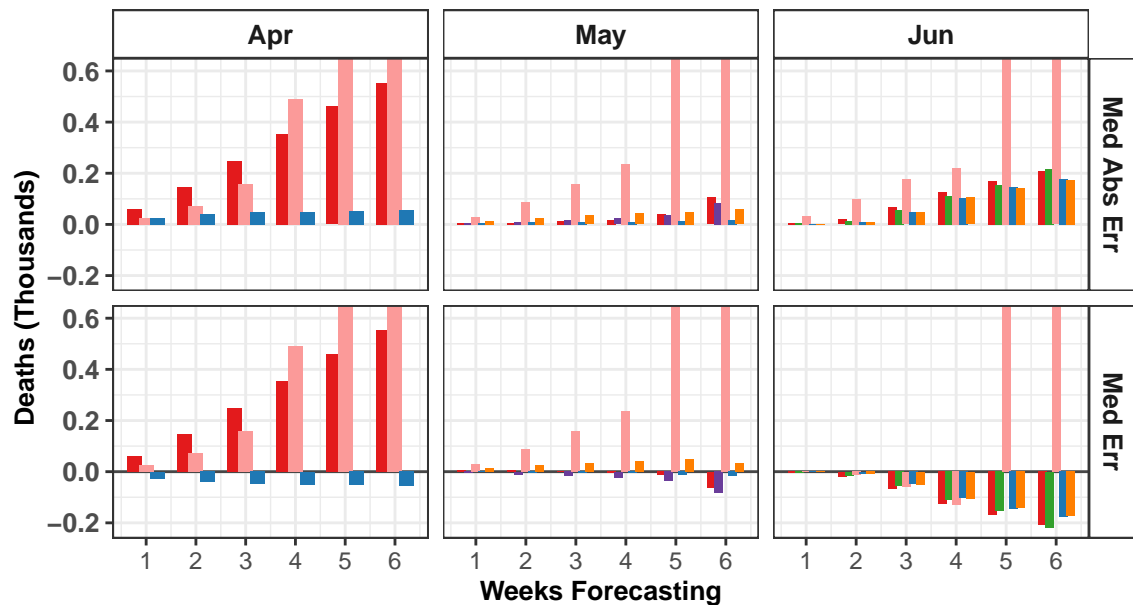

## All Model Versions

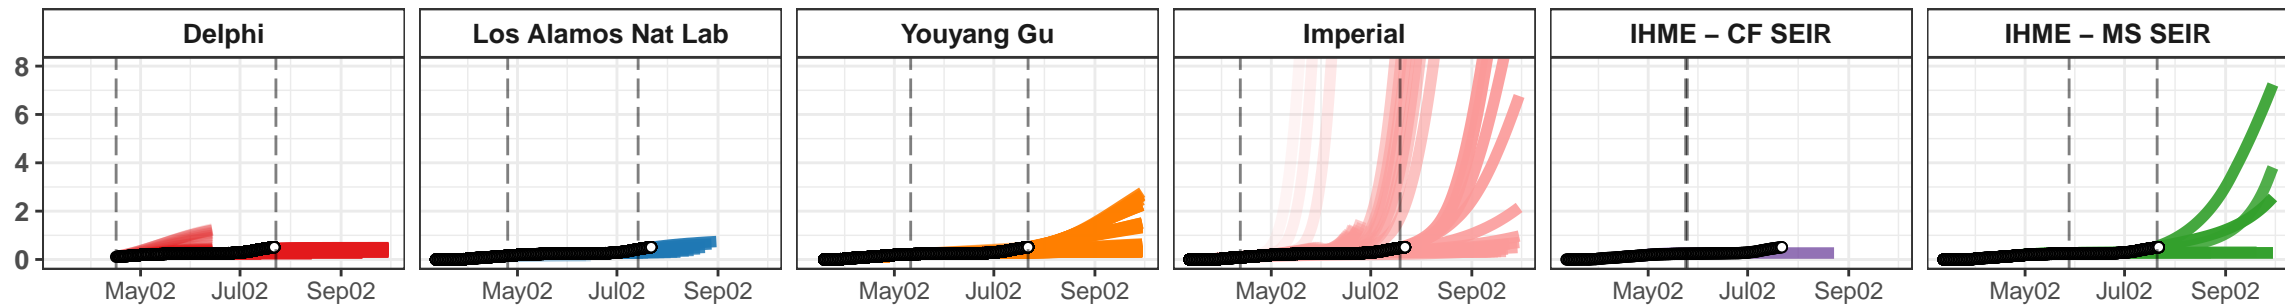

## All Cumulative Errors

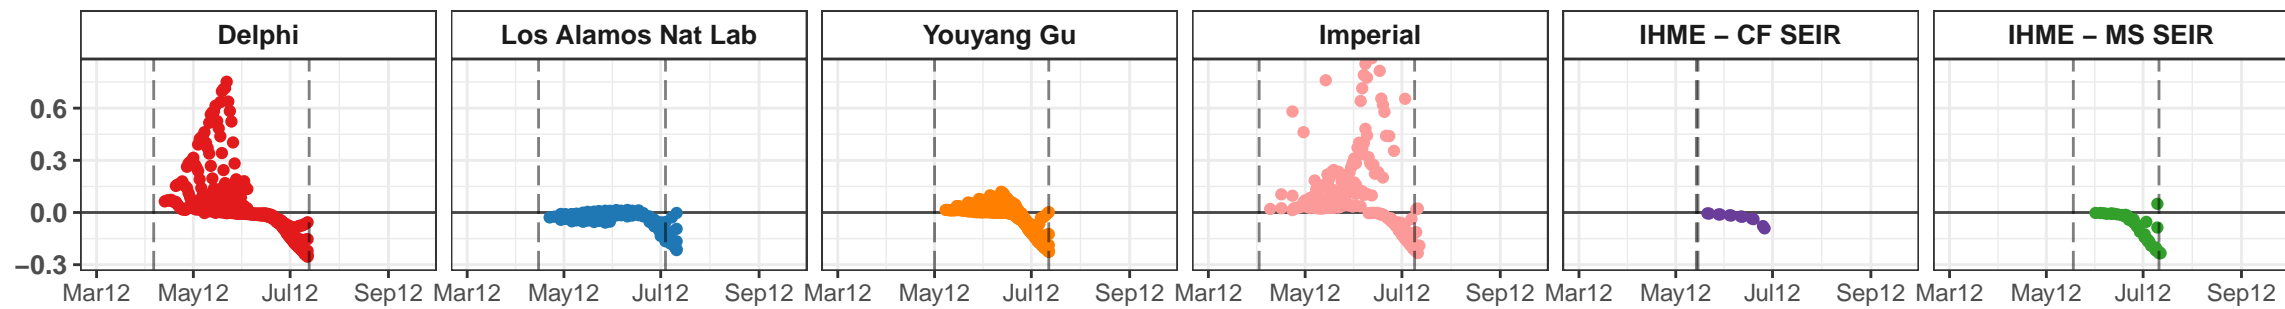

# Oklahoma

## Current Forecast

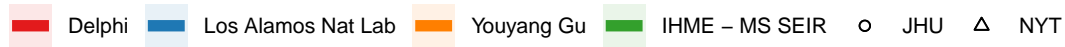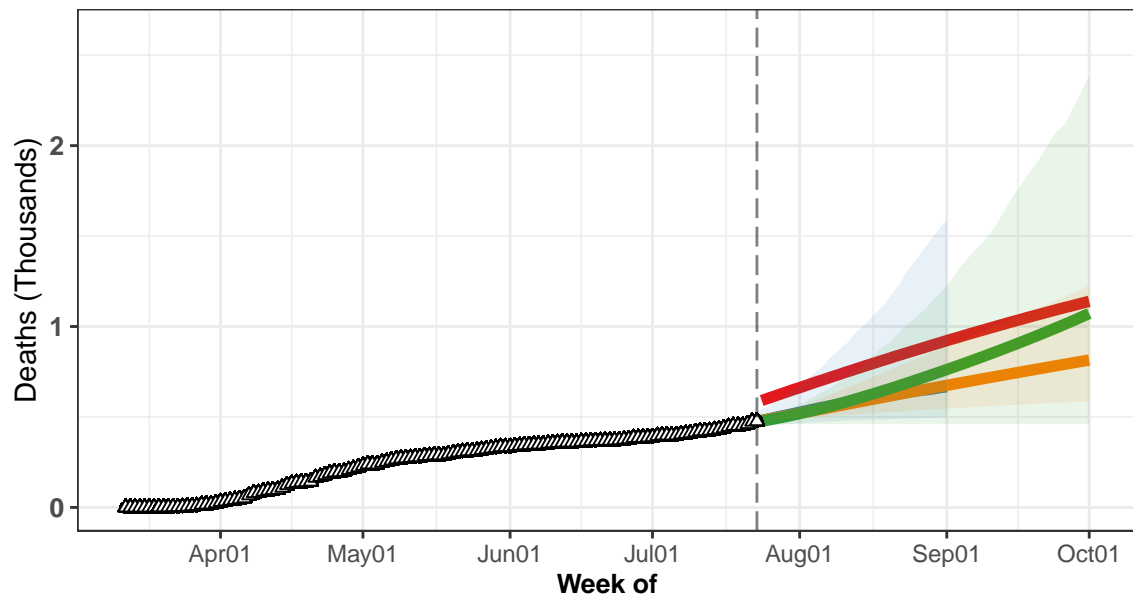

## Cumulative Out-Of-Sample Error (Post Intercept Shift)

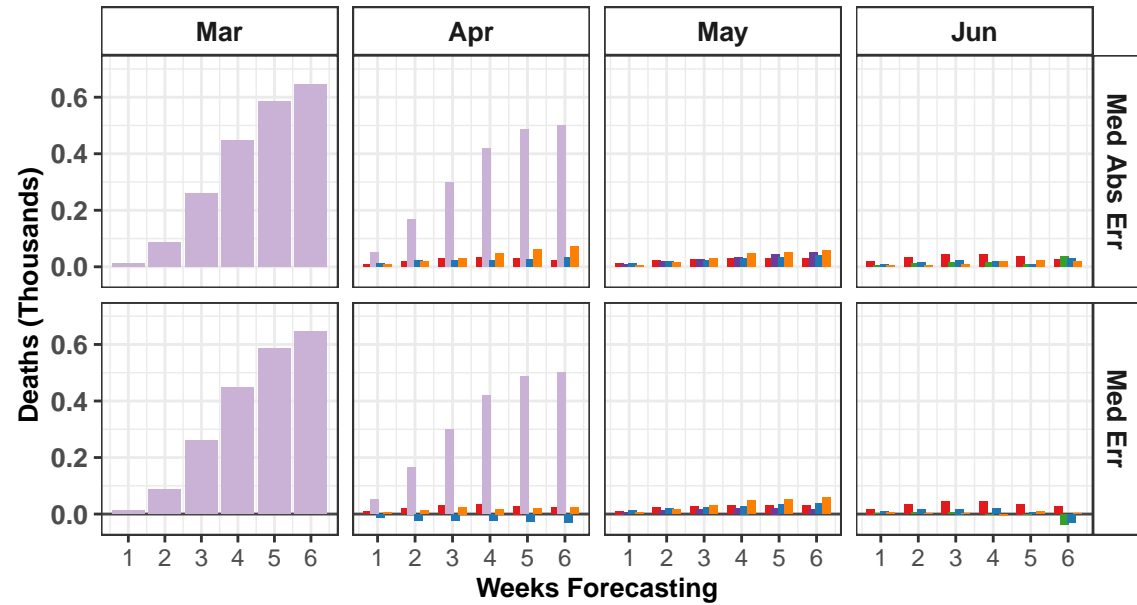

## All Model Versions

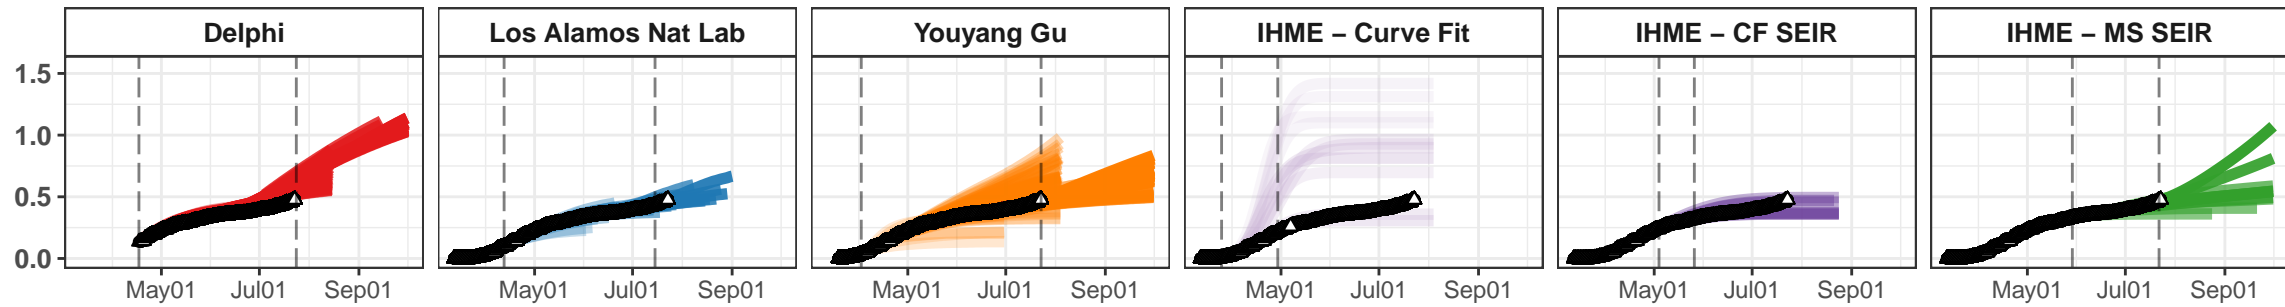

## All Cumulative Errors

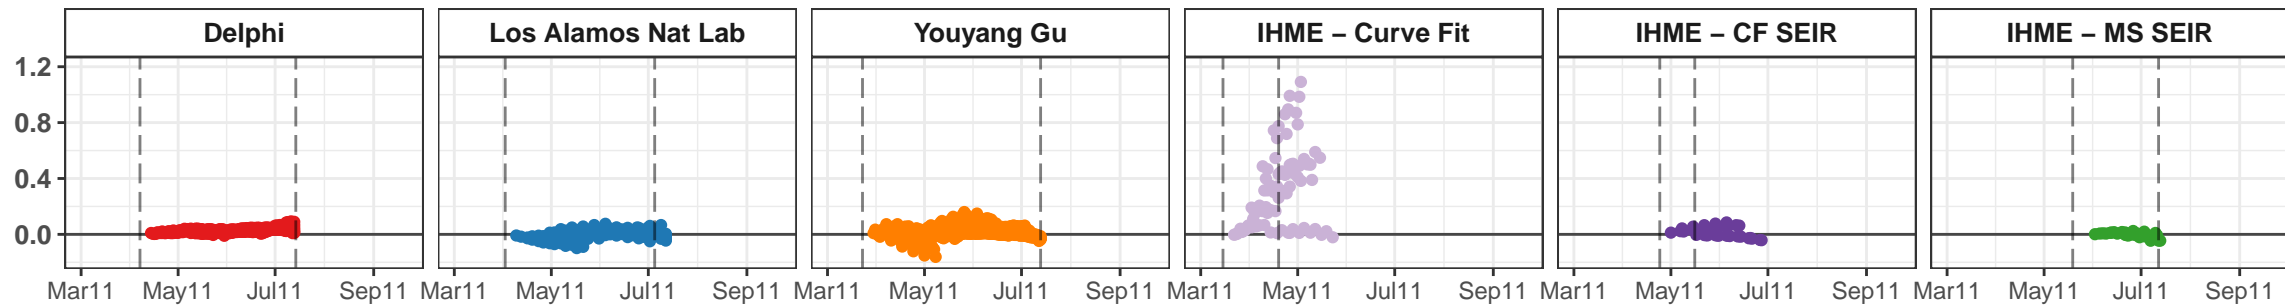

# Yemen

## Current Forecast

Delphi Los Alamos Nat Lab Imperial

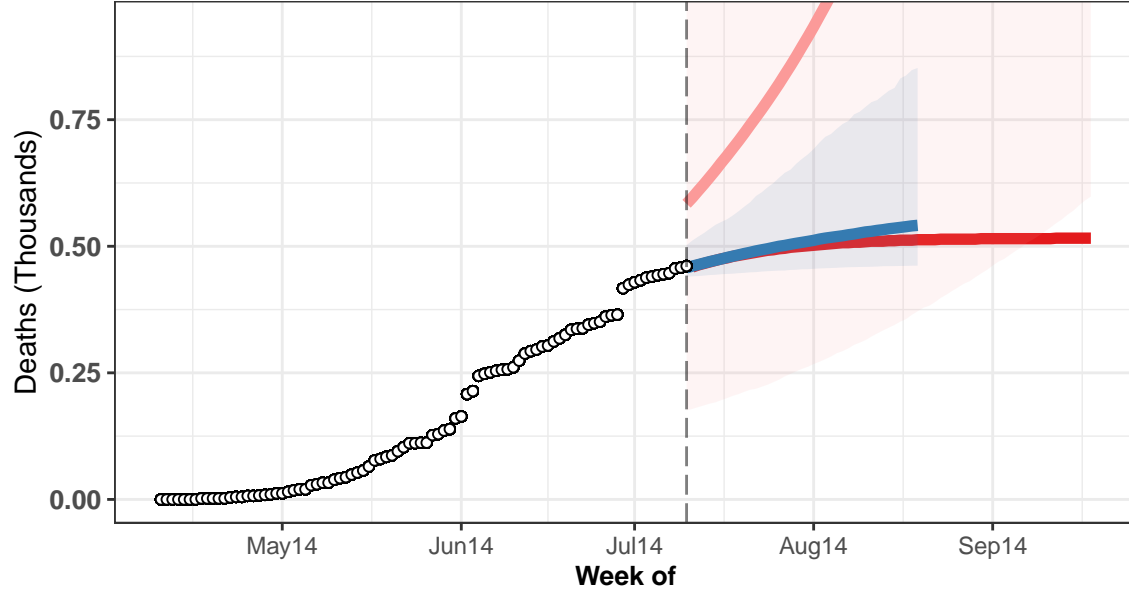

## Cumulative Out-Of-Sample Error (Post Intercept Shift)

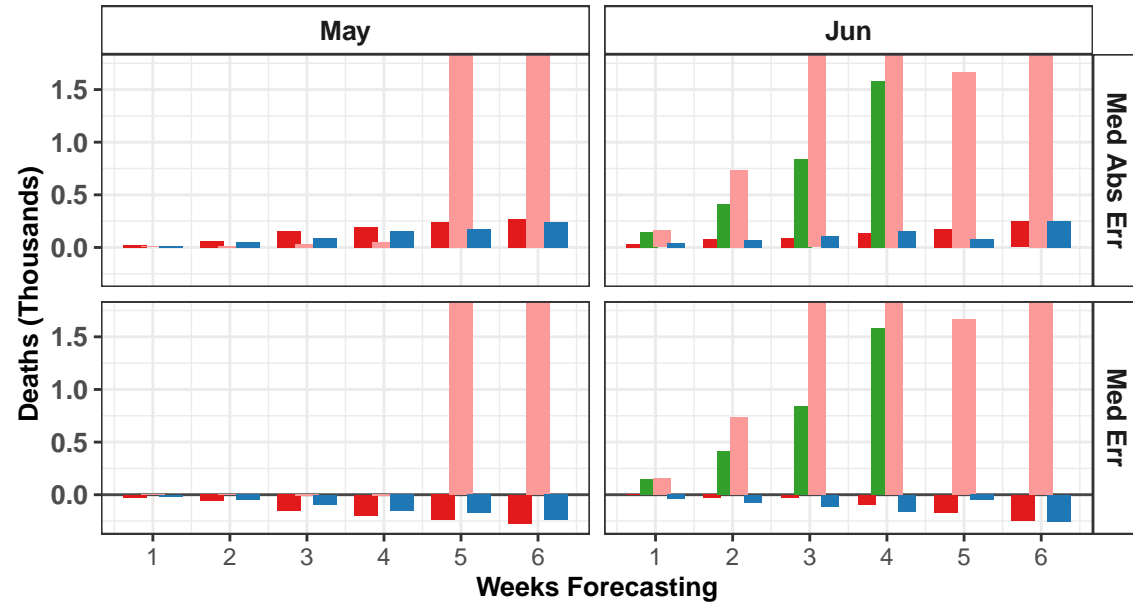

## All Model Versions

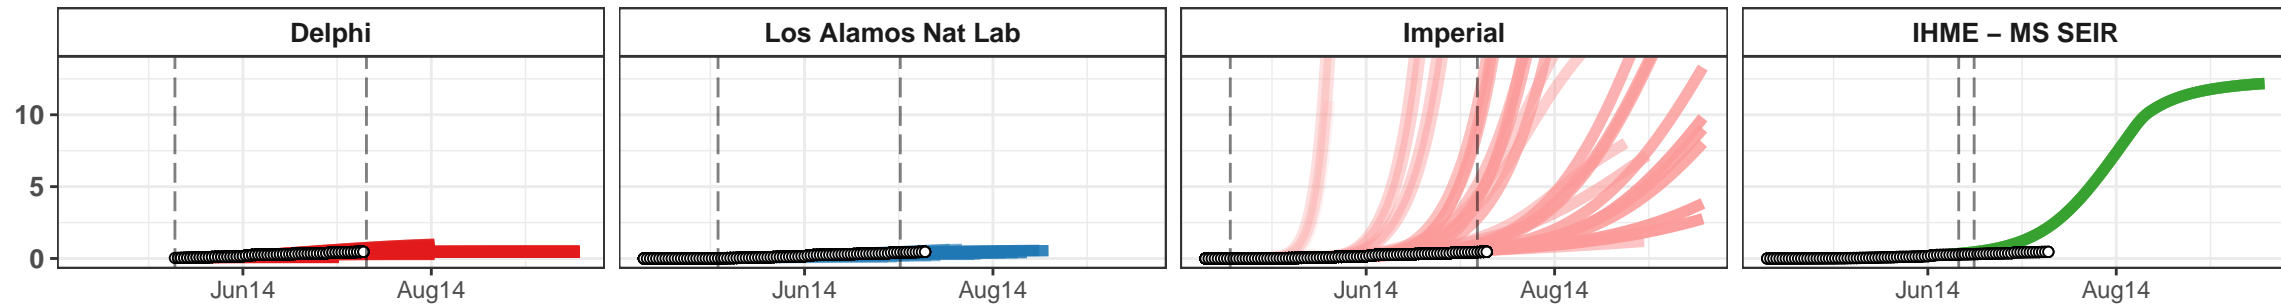

## All Cumulative Errors

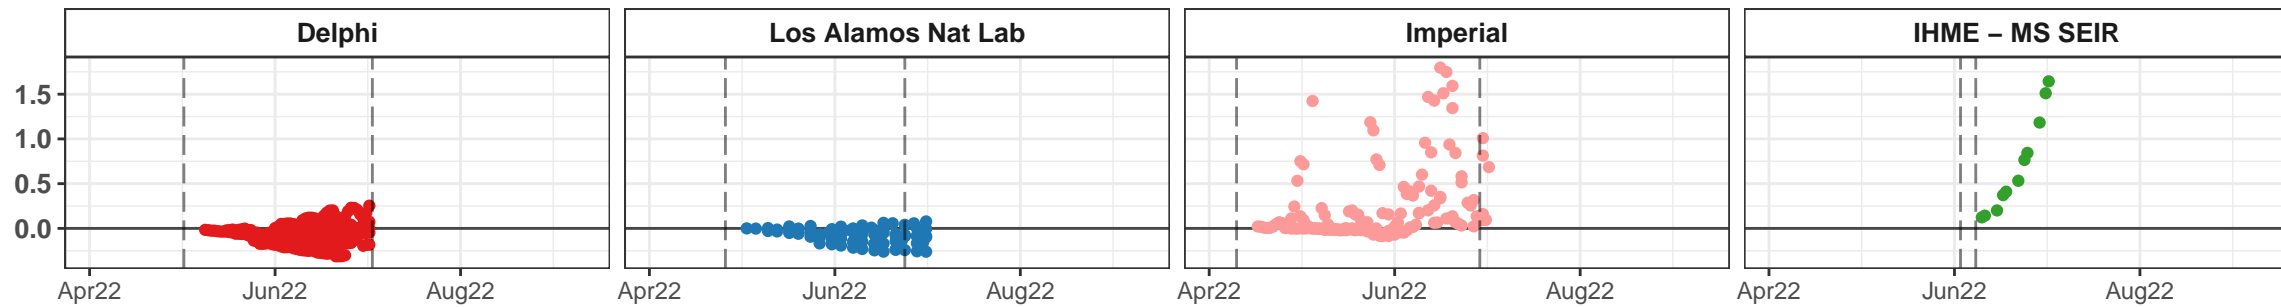

# Macedonia

## Current Forecast

Delphi Los Alamos Nat Lab Imperial IHME – MS SEIR

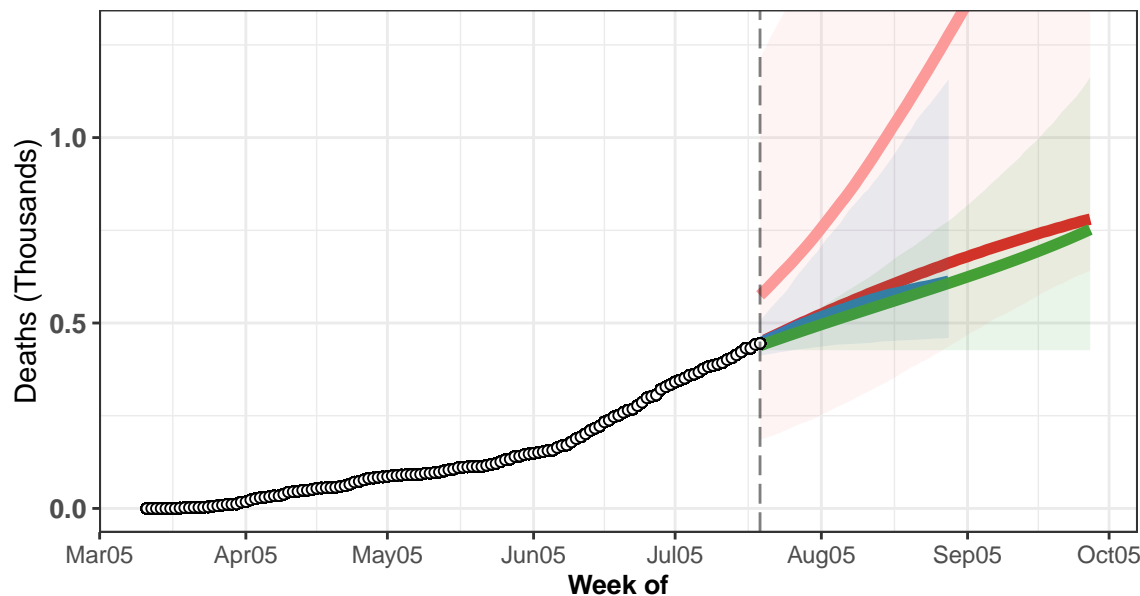

## Cumulative Out-Of-Sample Error (Post Intercept Shift)

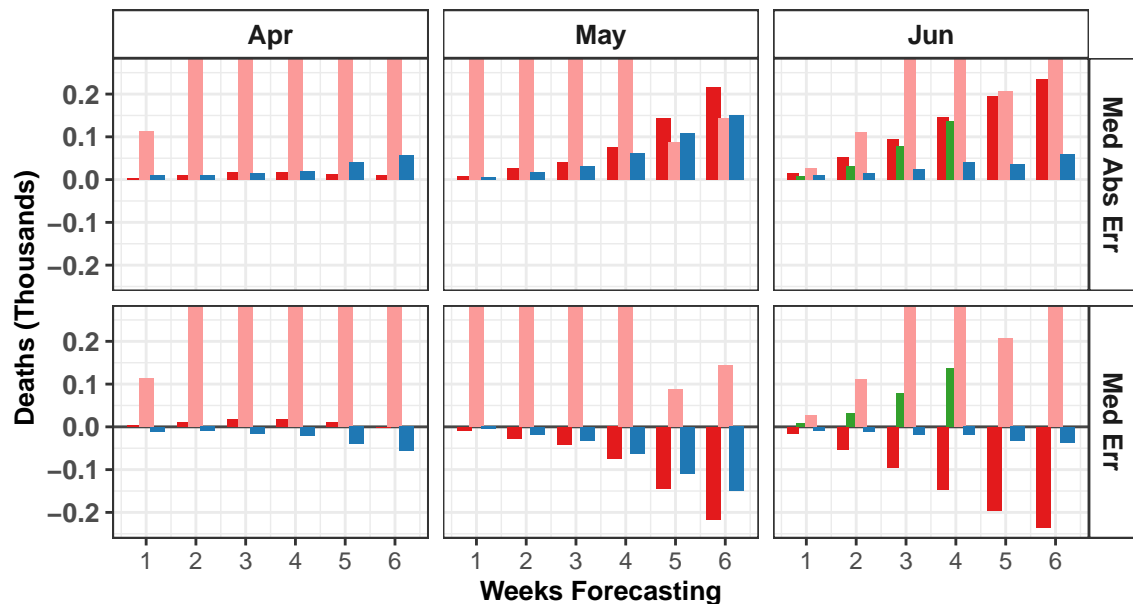

## All Model Versions

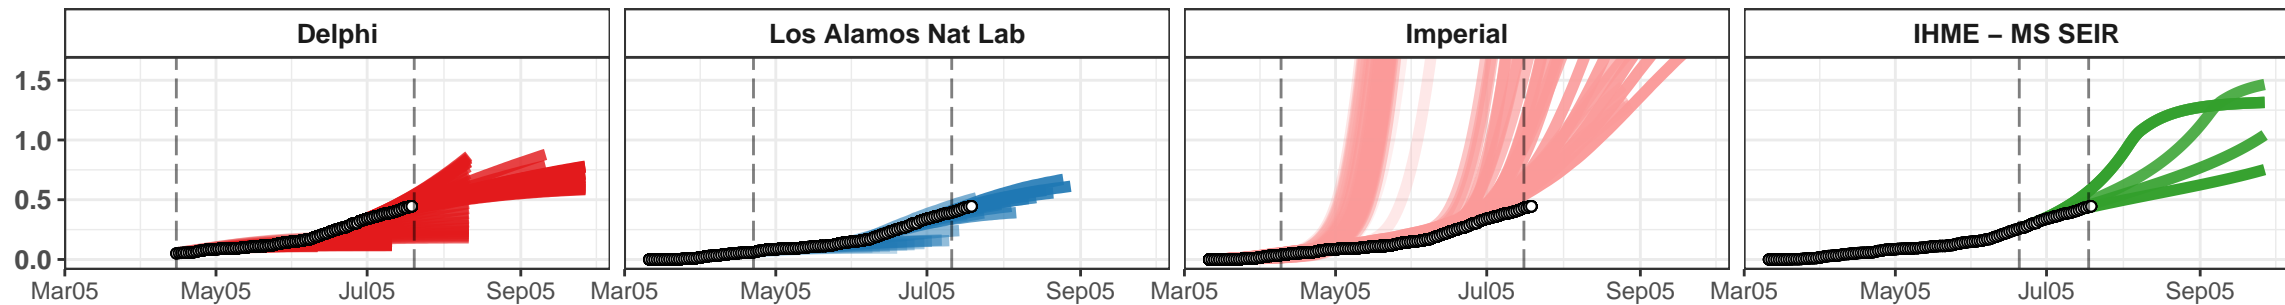

## All Cumulative Errors

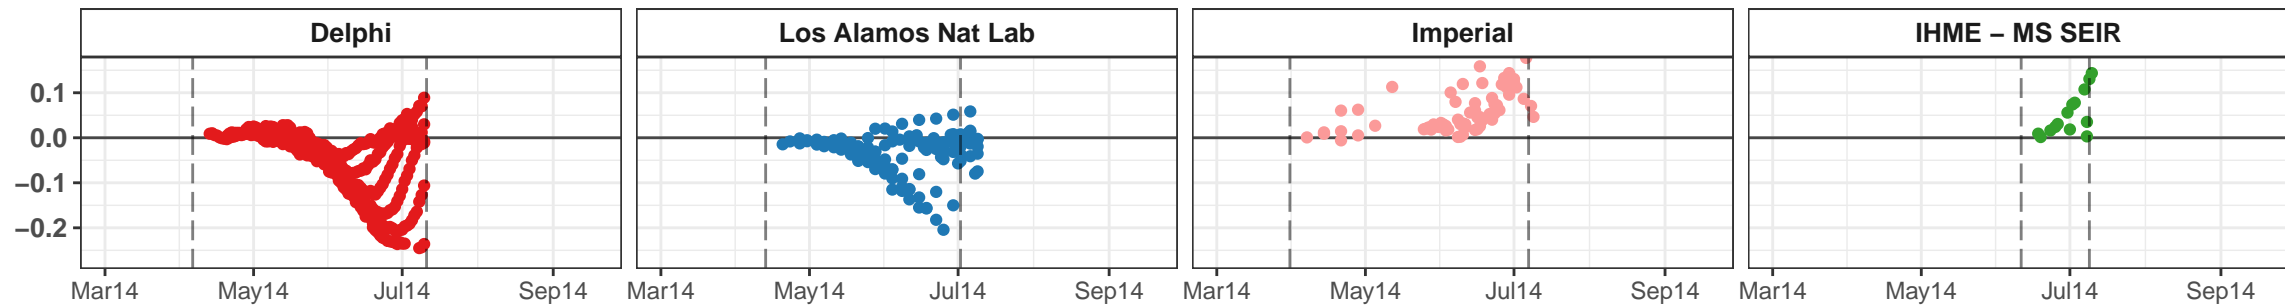

# Israel

## Current Forecast

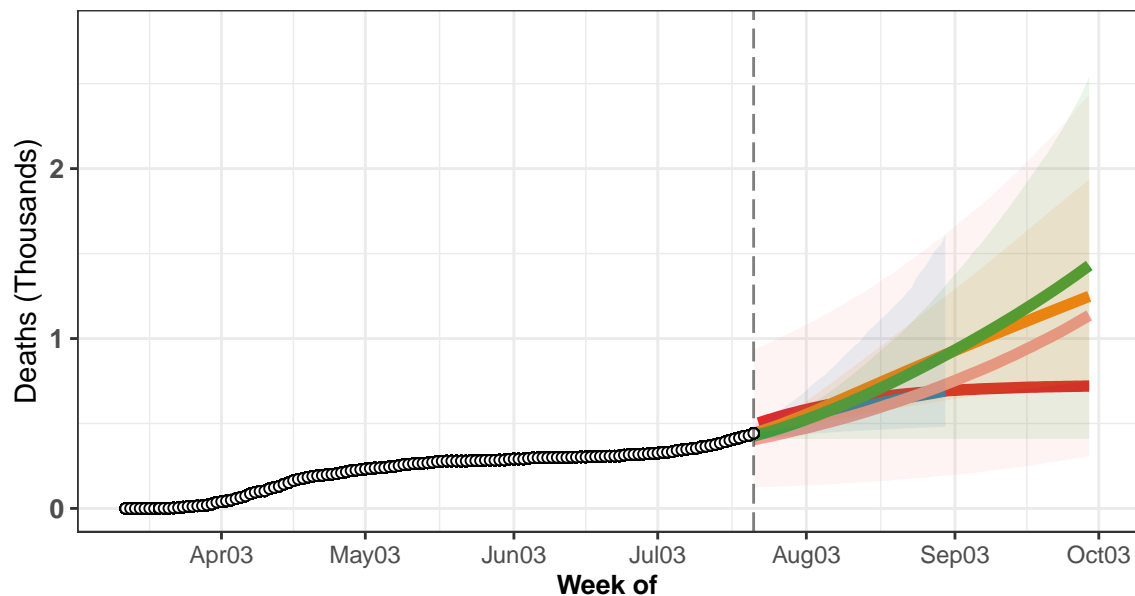

## Cumulative Out-Of-Sample Error (Post Intercept Shift)

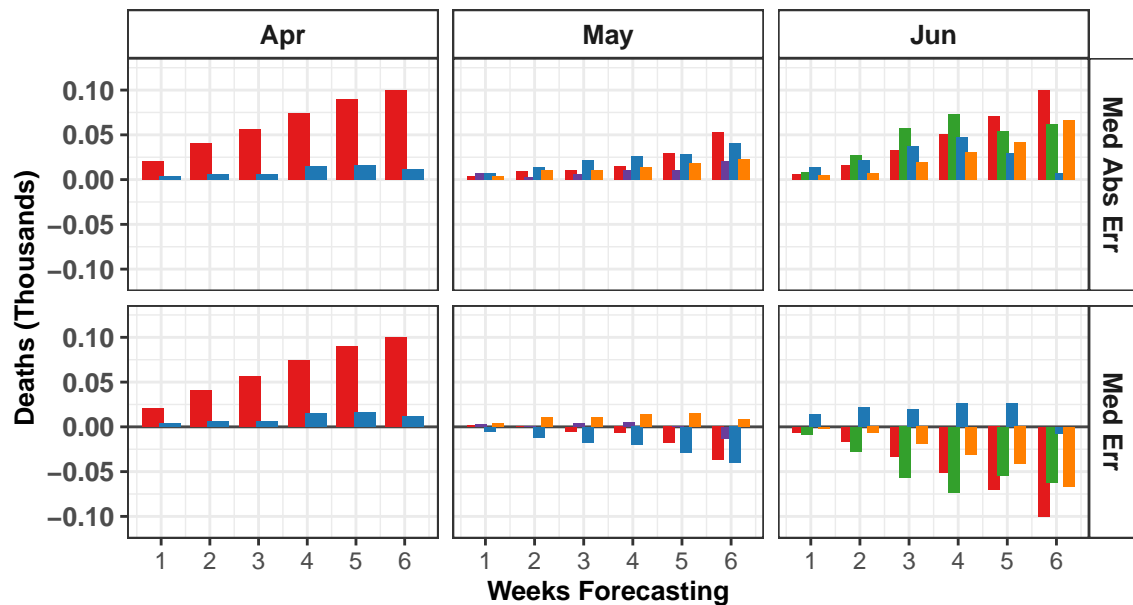

## All Model Versions

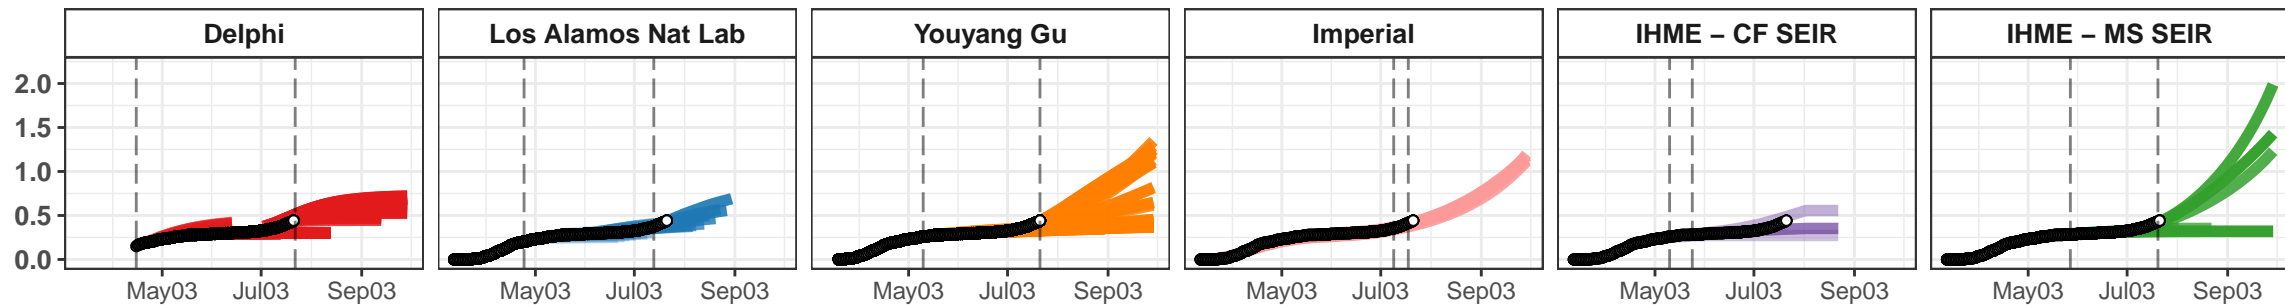

## All Cumulative Errors

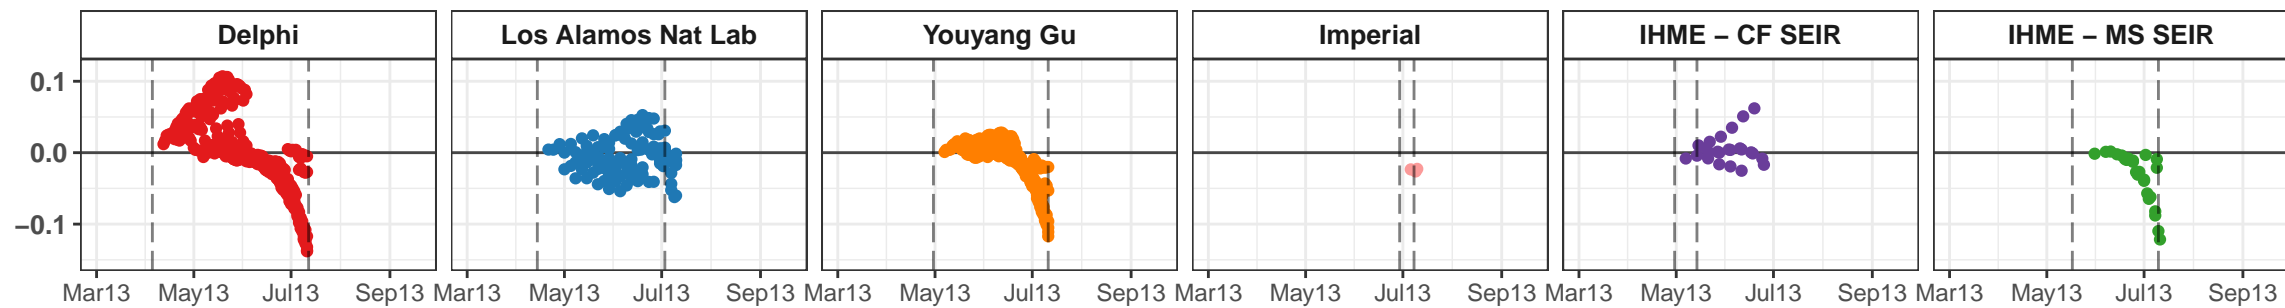

# Kuwait

## Current Forecast

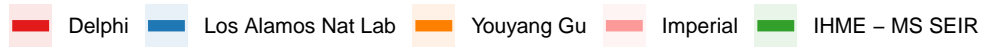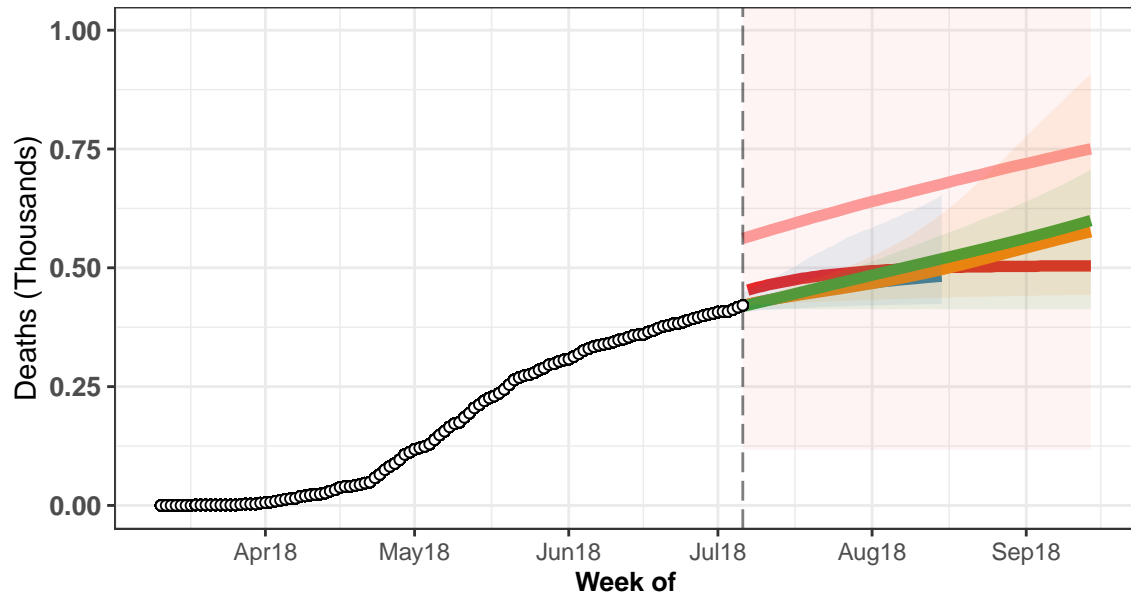

## Cumulative Out-Of-Sample Error (Post Intercept Shift)

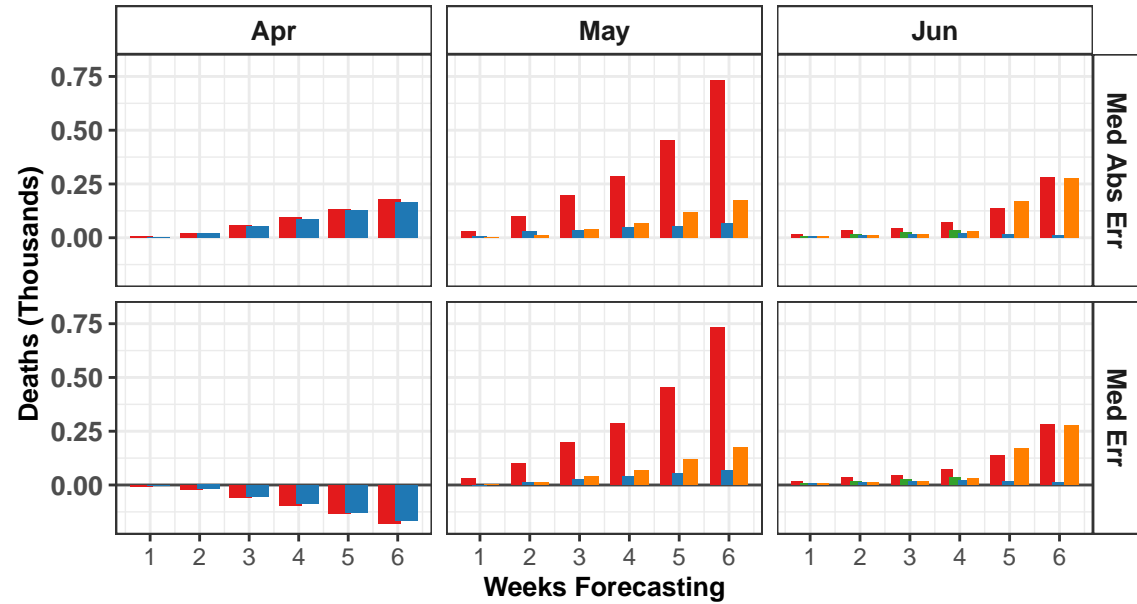

## All Model Versions

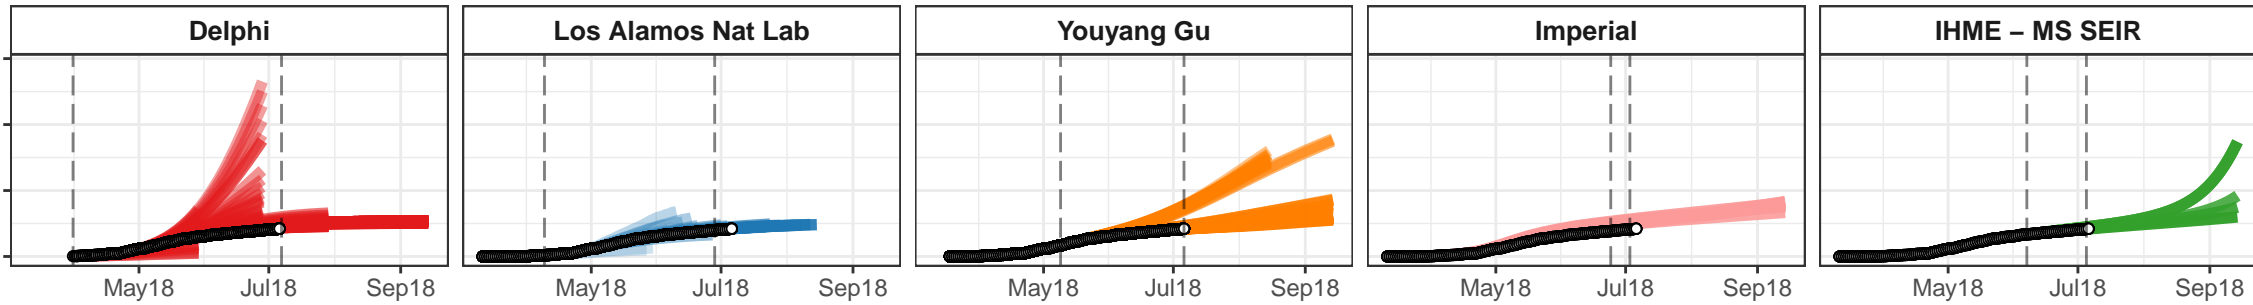

## All Cumulative Errors

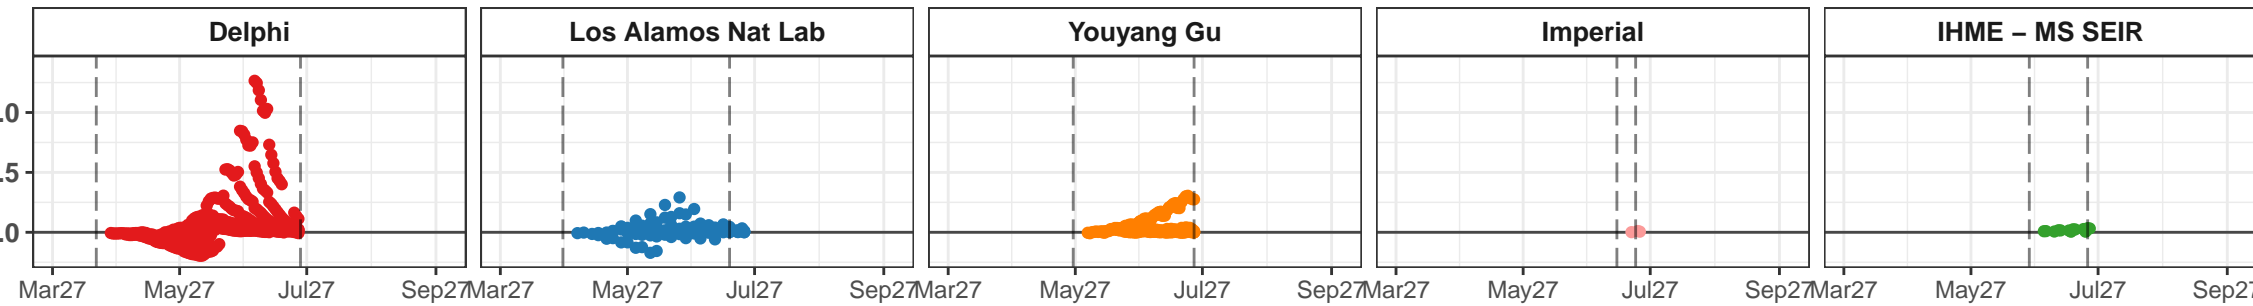



# New Hampshire

## Current Forecast

Delphi Los Alamos Nat Lab Youyang Gu IHME – MS SEIR ○ JHU △ NYT

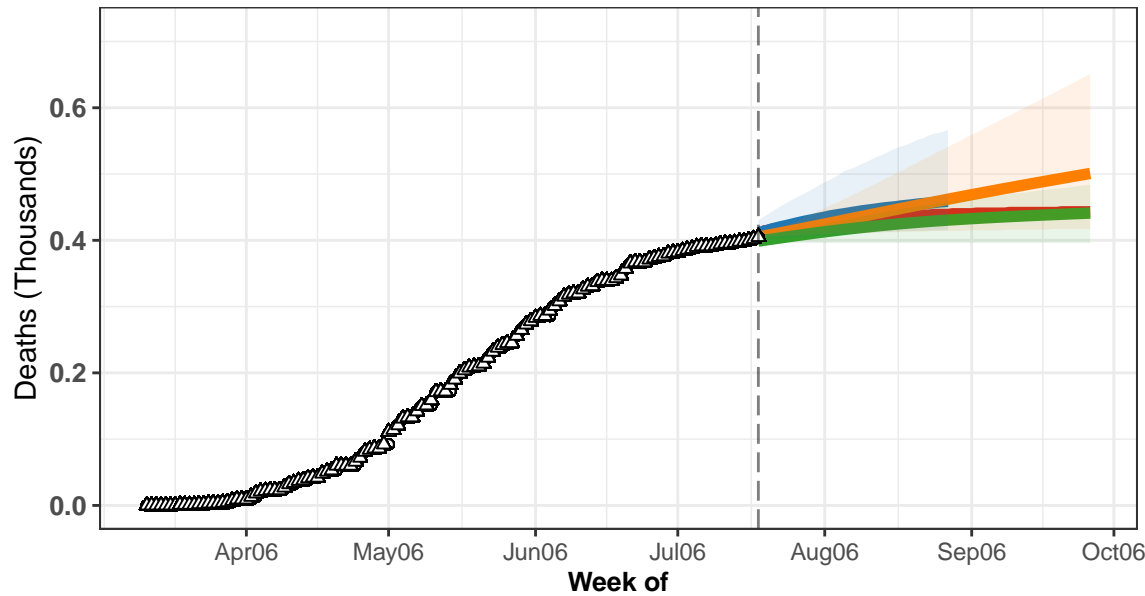

## Cumulative Out-Of-Sample Error (Post Intercept Shift)

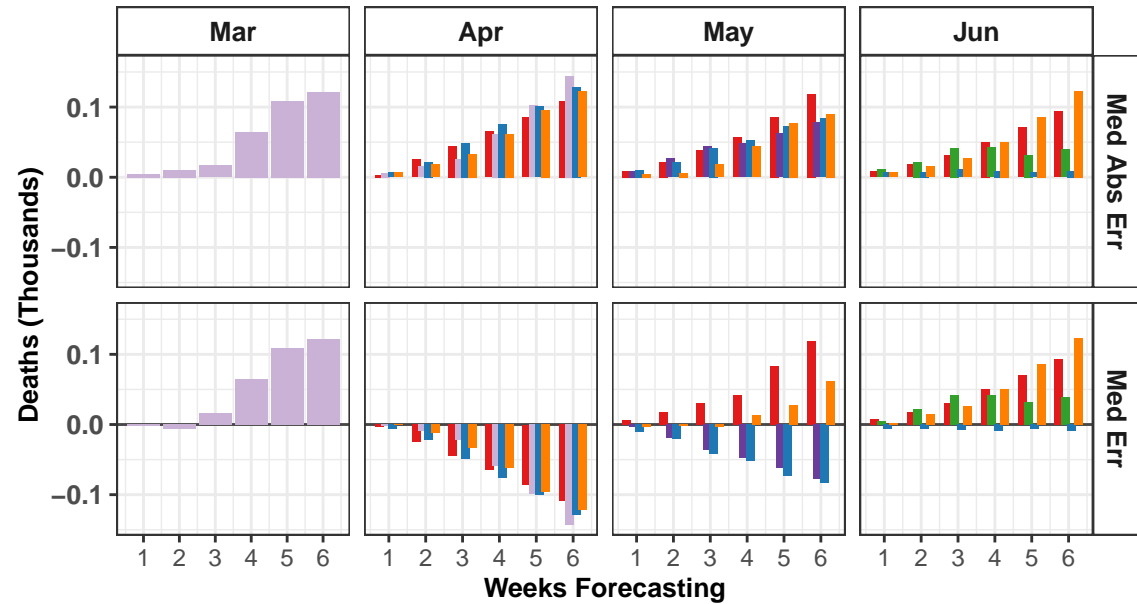

## All Model Versions

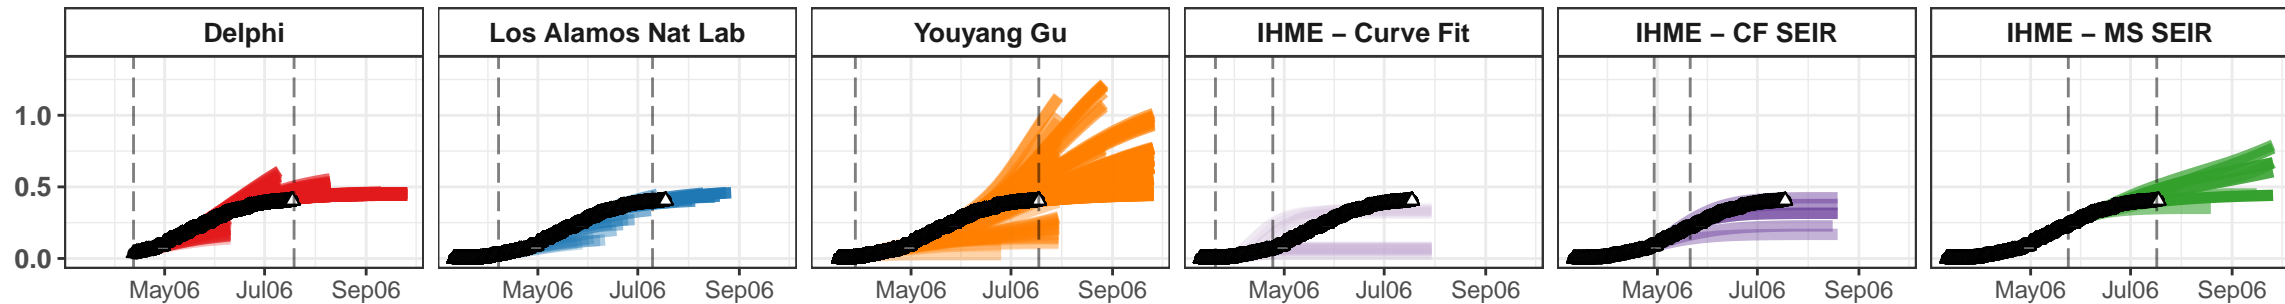

## All Cumulative Errors

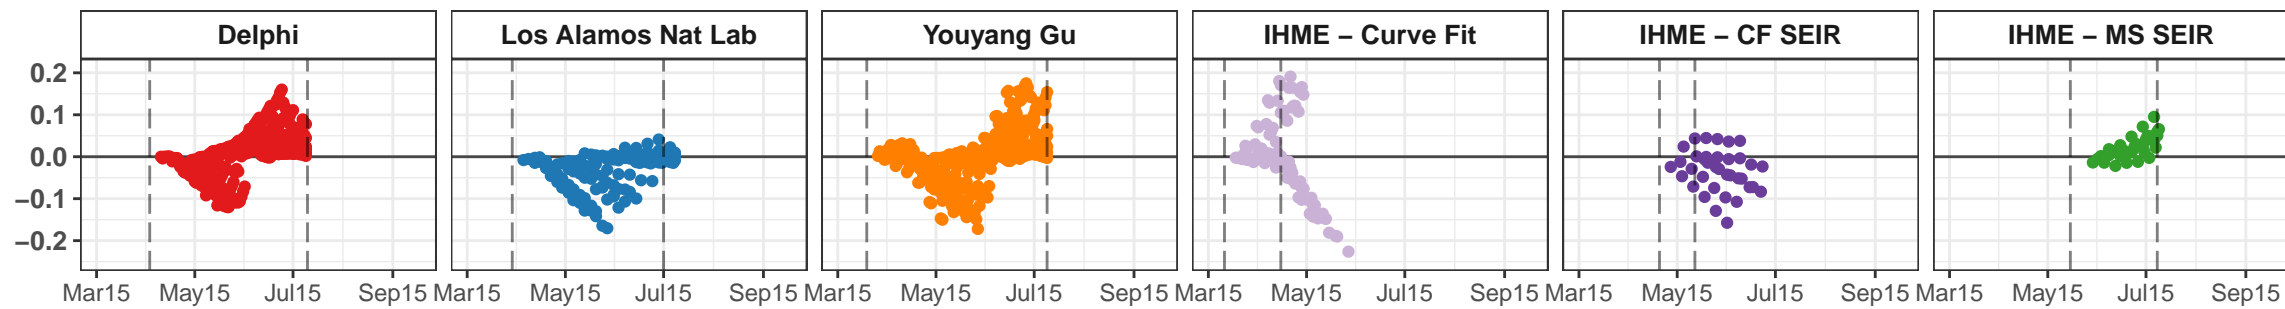

# Azerbaijan

## Current Forecast

Delphi Los Alamos Nat Lab Imperial IHME – MS SEIR

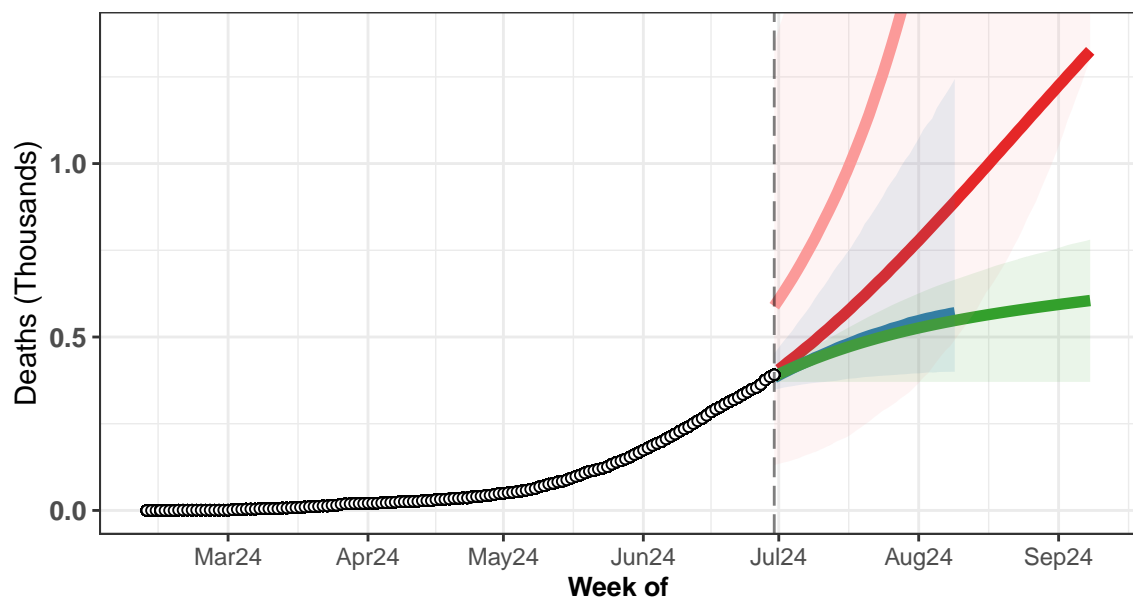

## Cumulative Out-Of-Sample Error (Post Intercept Shift)

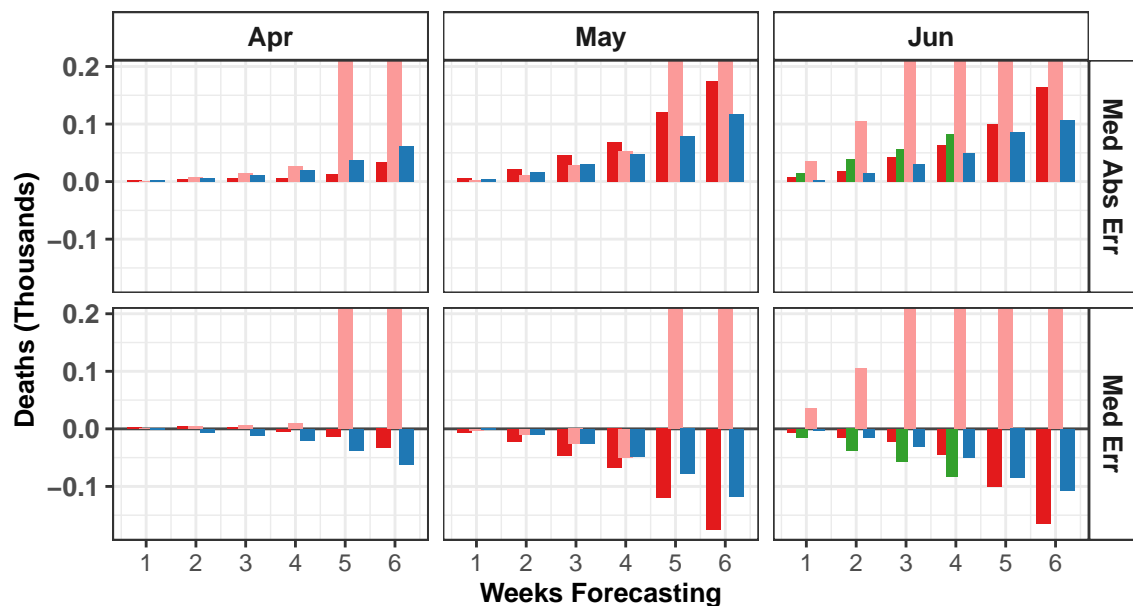

## All Model Versions

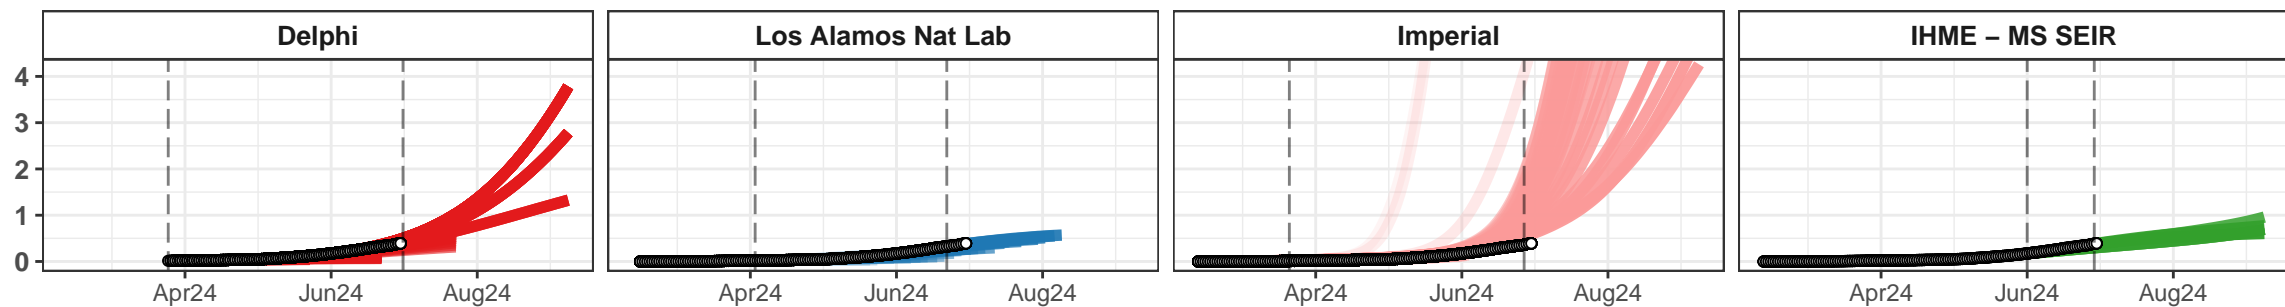

## All Cumulative Errors

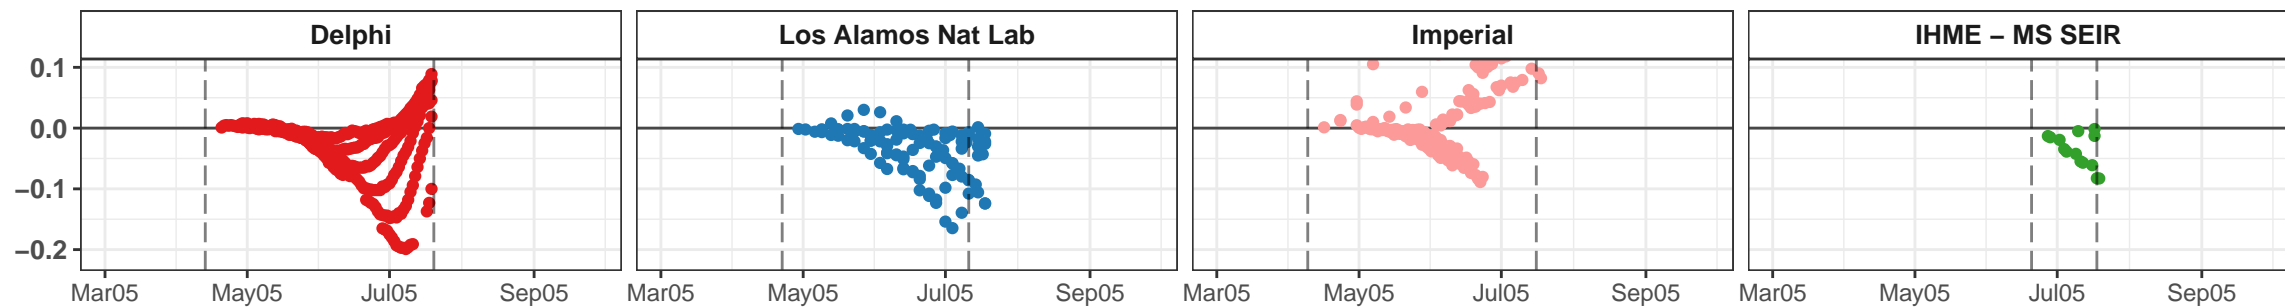

# Arkansas

## Current Forecast

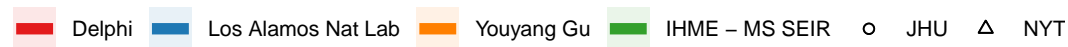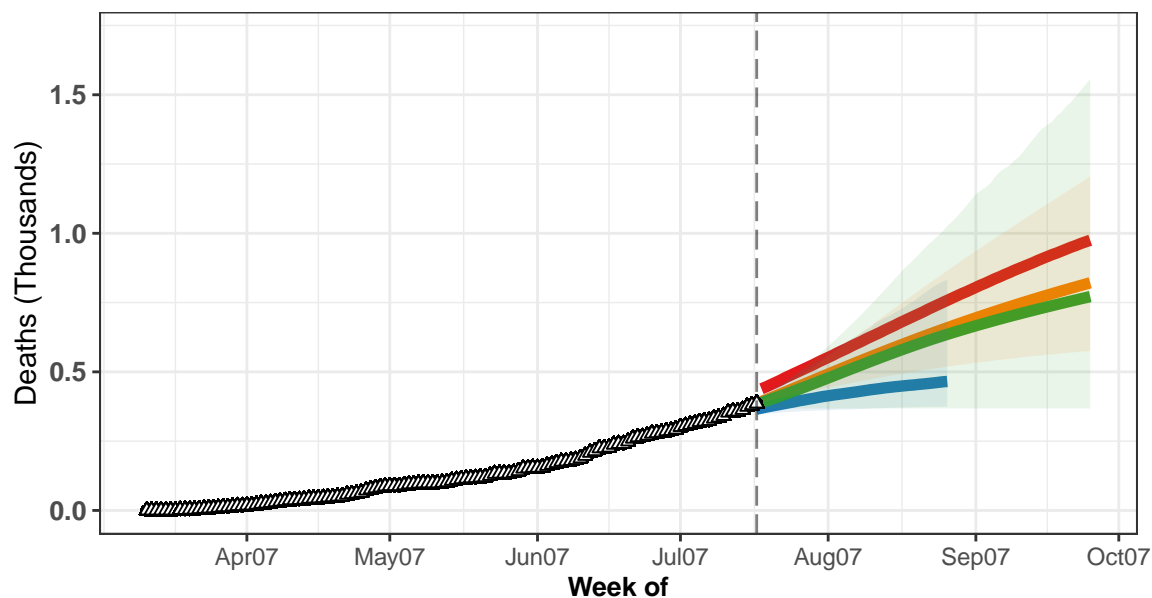

## Cumulative Out-Of-Sample Error (Post Intercept Shift)

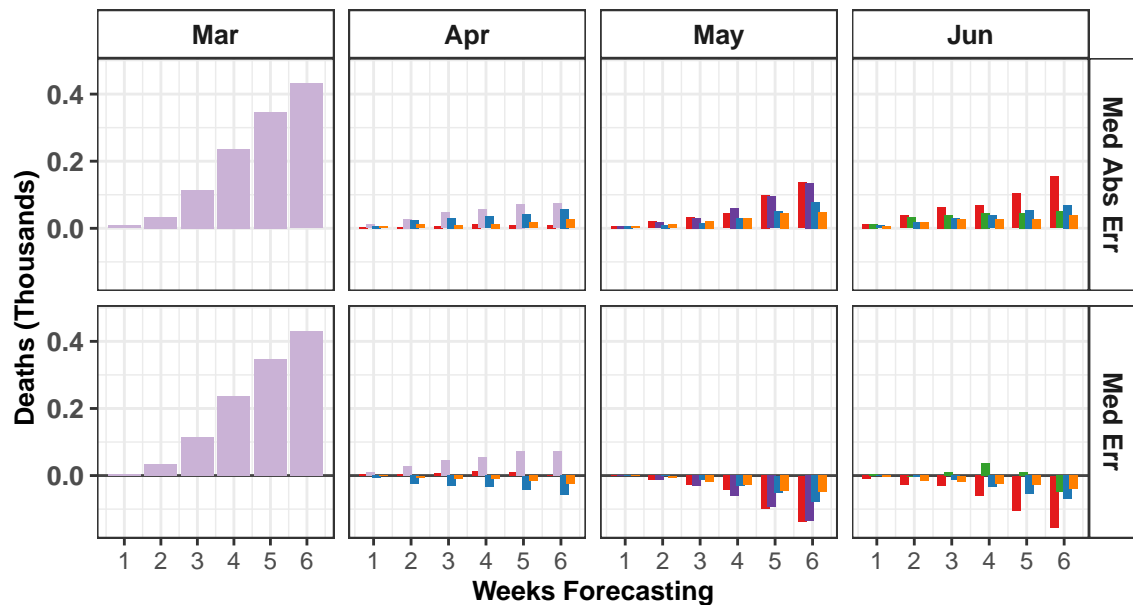

## All Model Versions

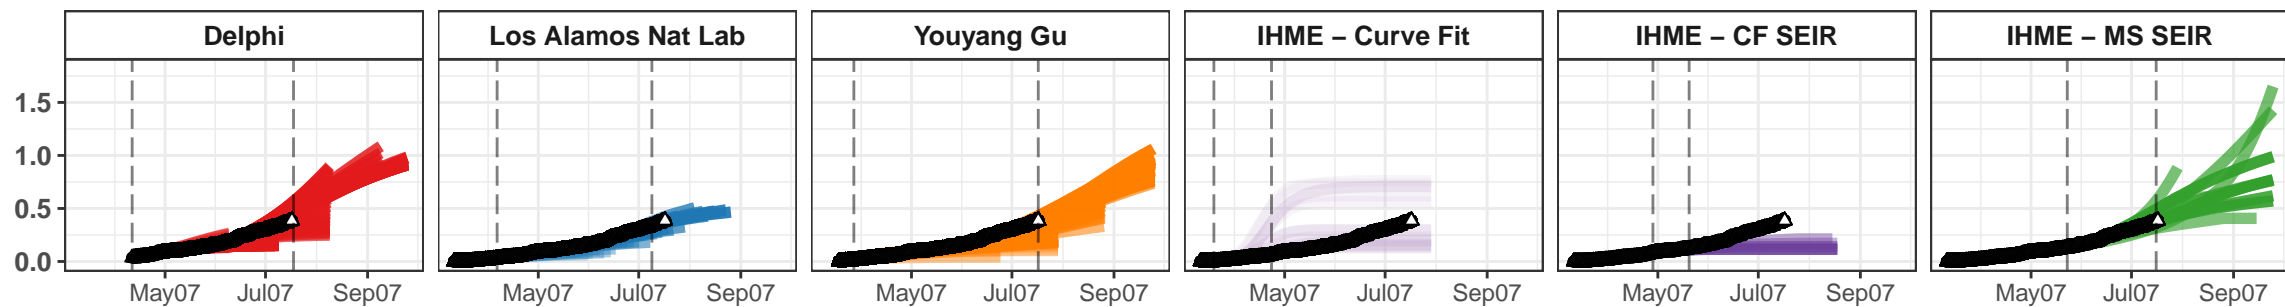

## All Cumulative Errors

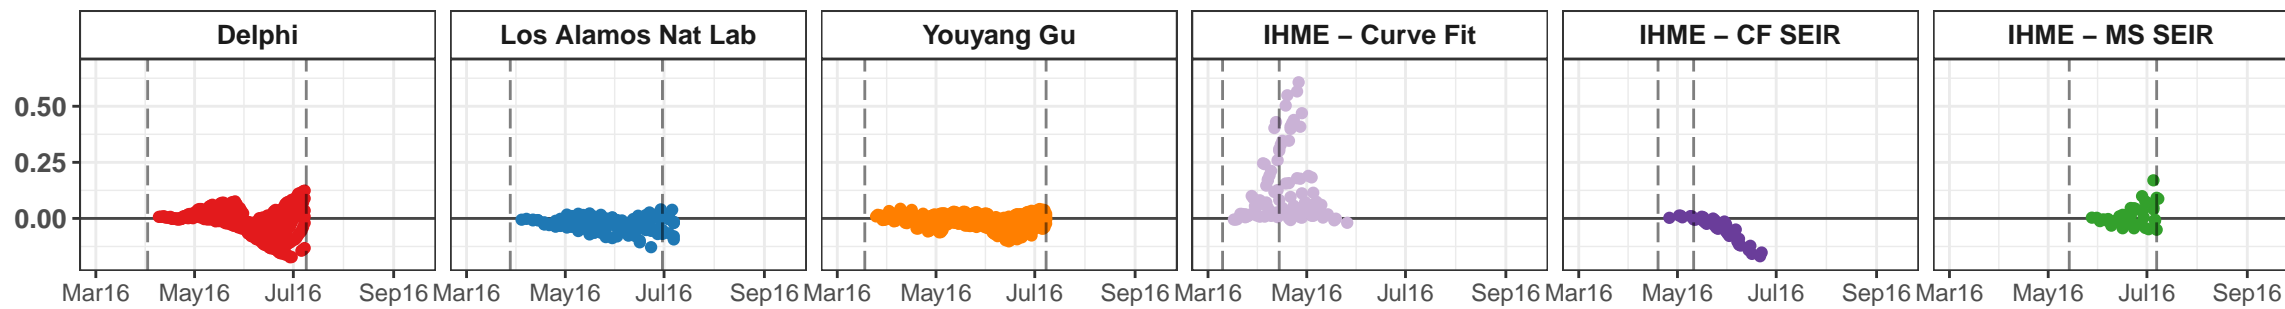

# Cameroon

## Current Forecast

Delphi Los Alamos Nat Lab Imperial IHME – MS SEIR

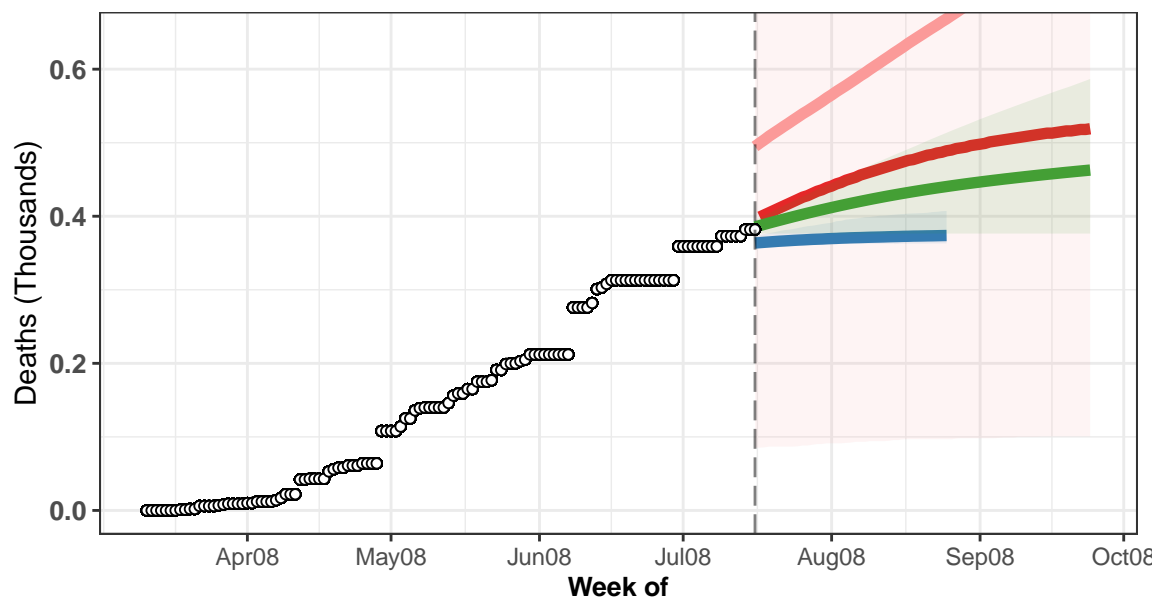

## Cumulative Out-Of-Sample Error (Post Intercept Shift)

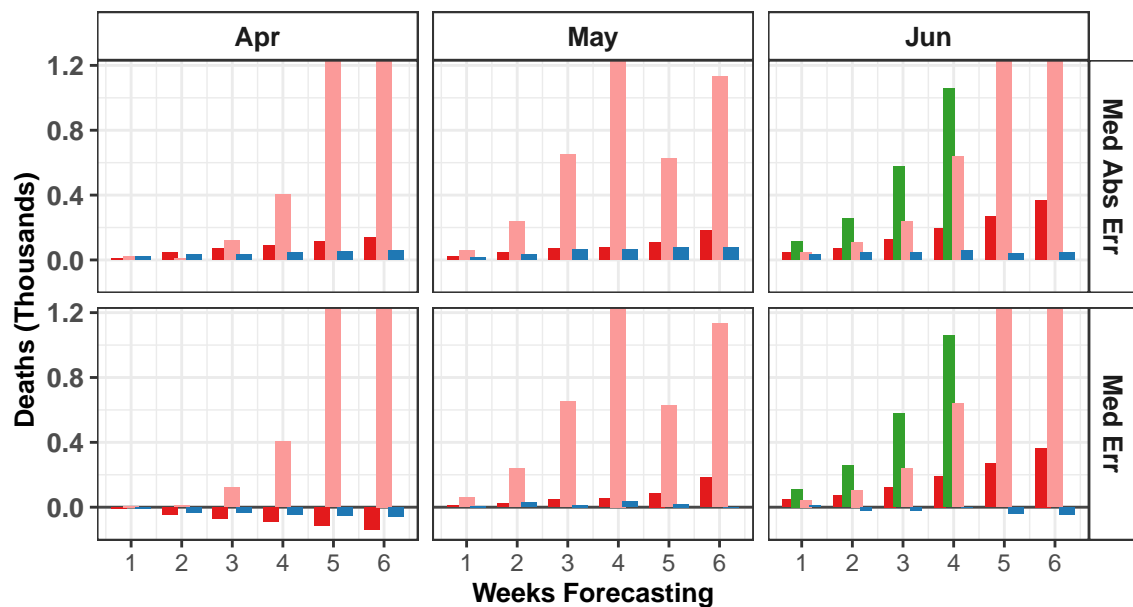

## All Model Versions

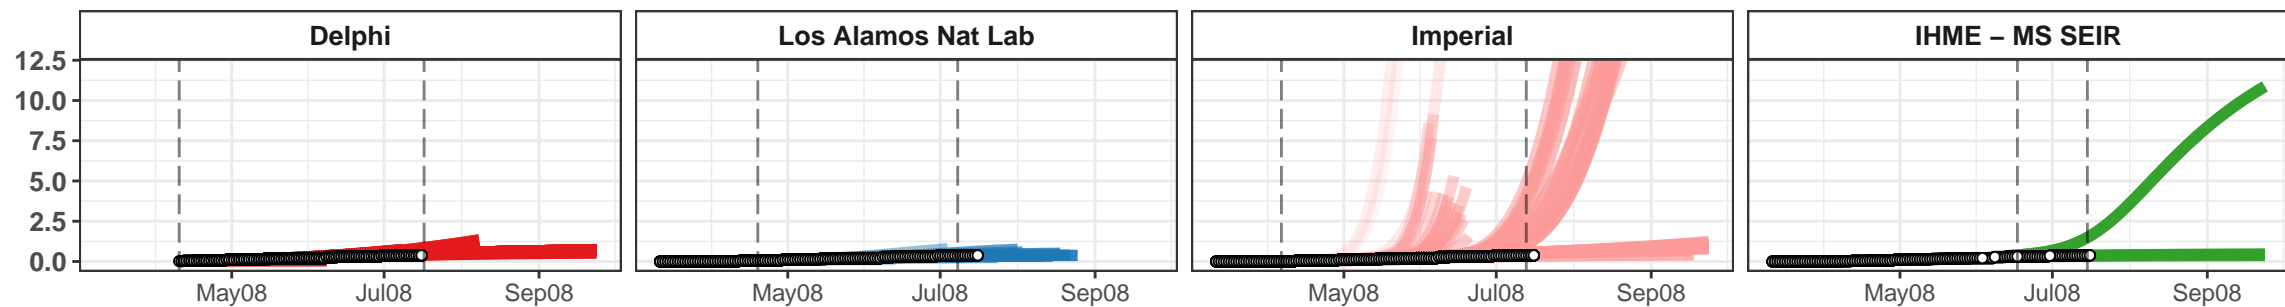

## All Cumulative Errors

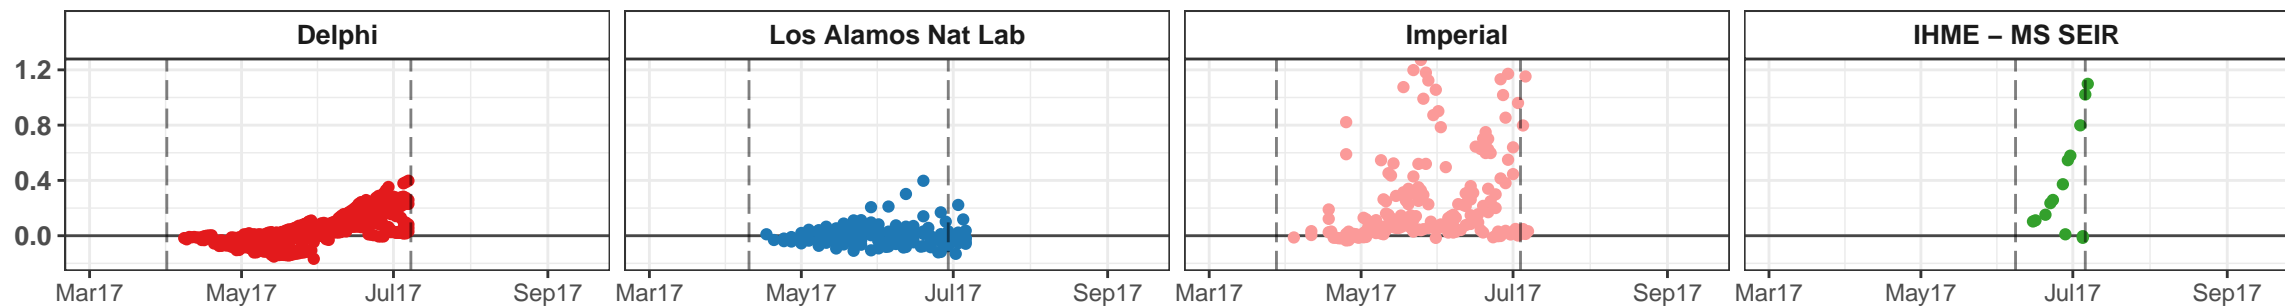

# El Salvador

## Current Forecast

Delphi Los Alamos Nat Lab Imperial IHME – MS SEIR

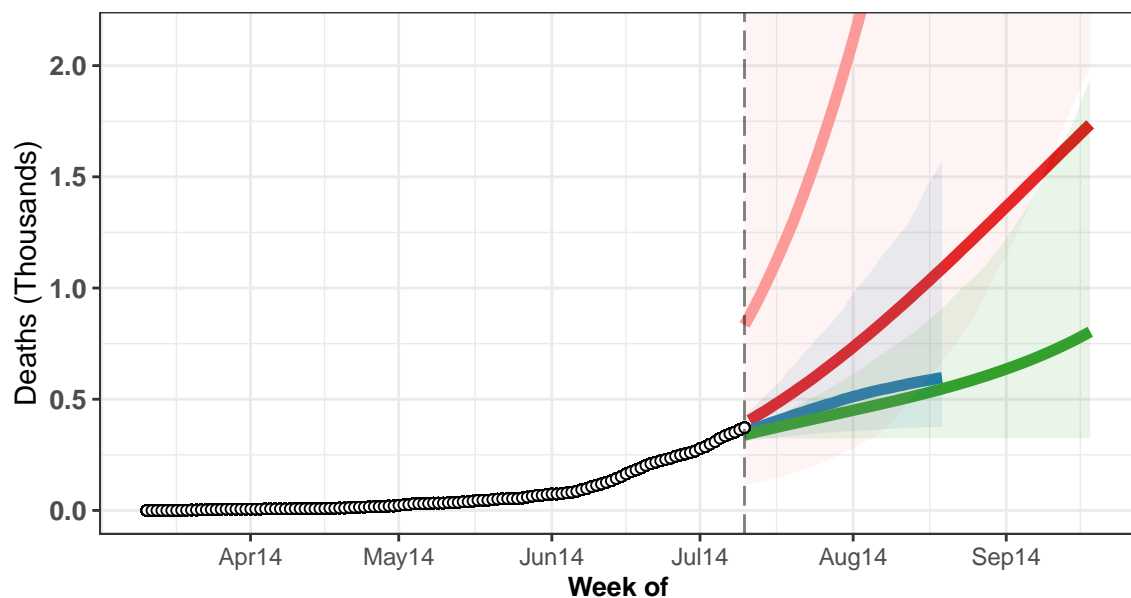

## Cumulative Out-Of-Sample Error (Post Intercept Shift)

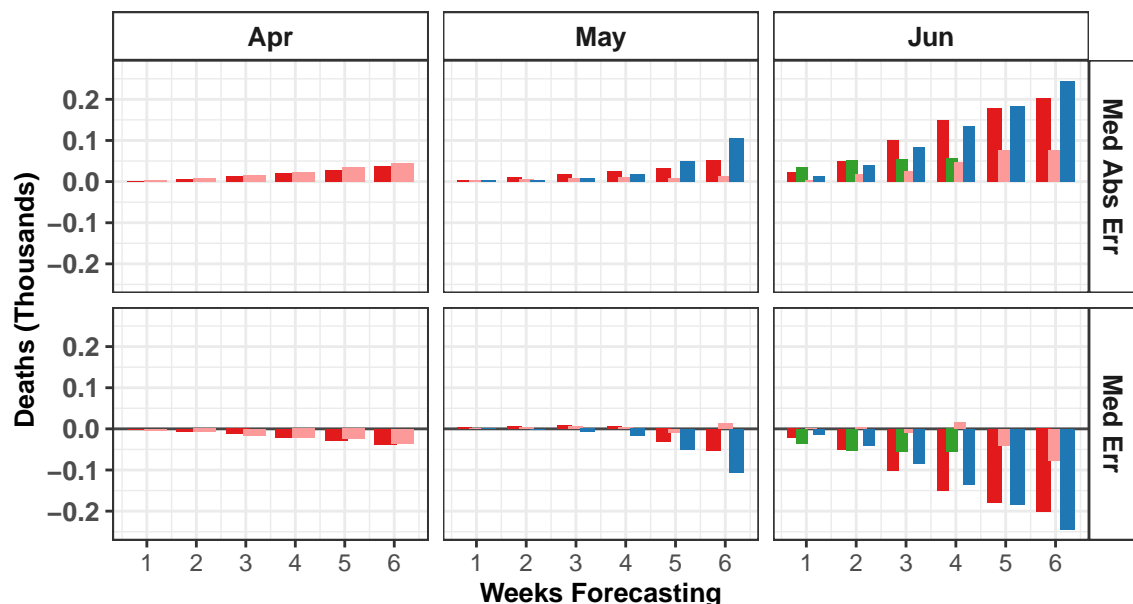

## All Model Versions

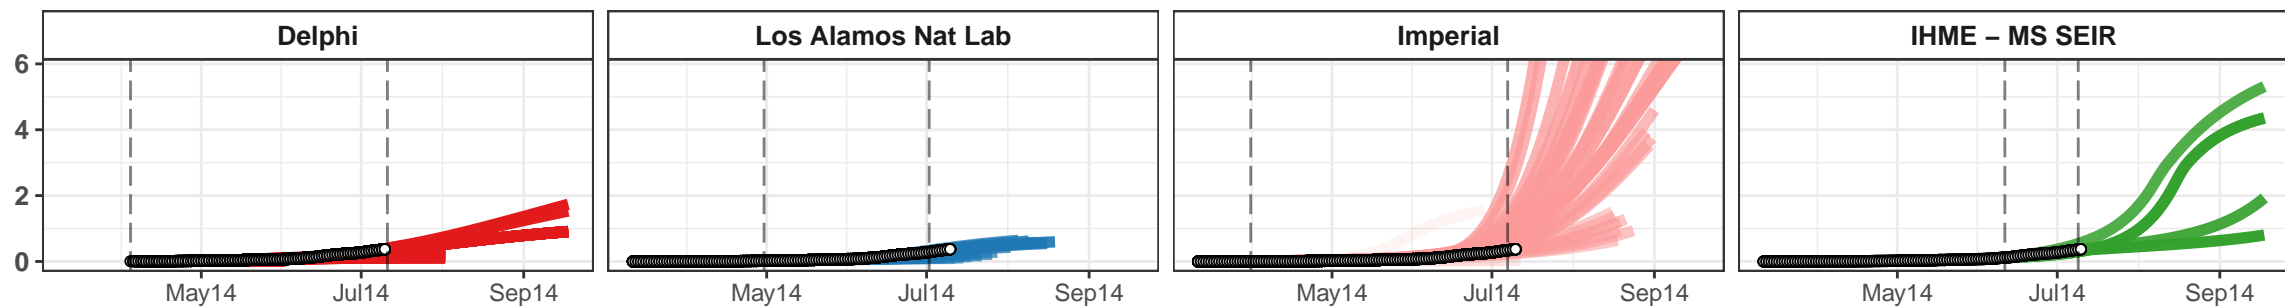

## All Cumulative Errors

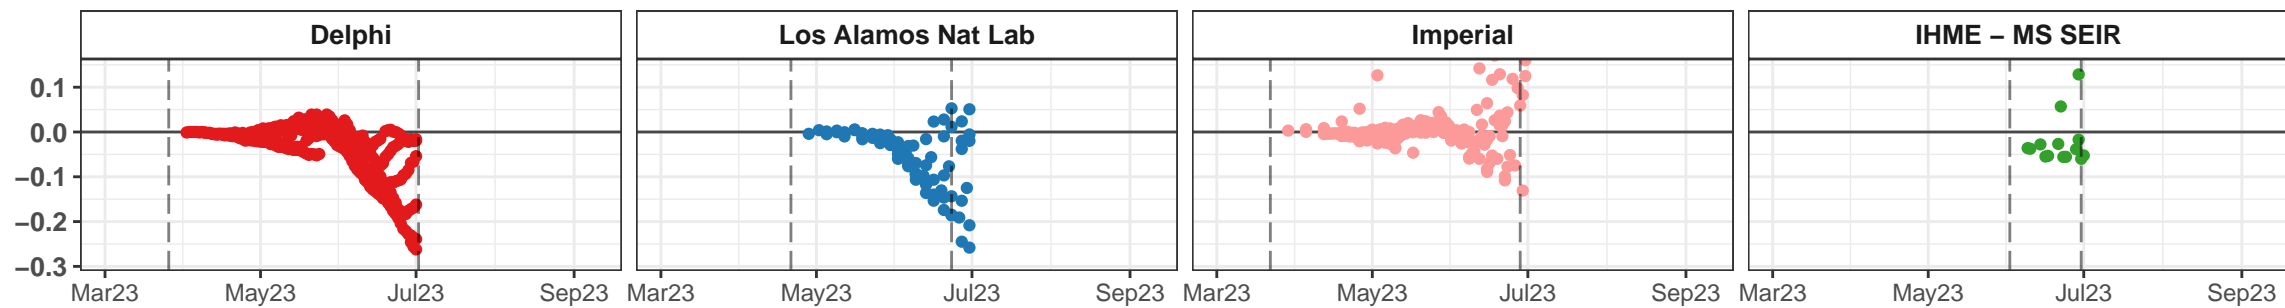

# Czech Republic

## Current Forecast

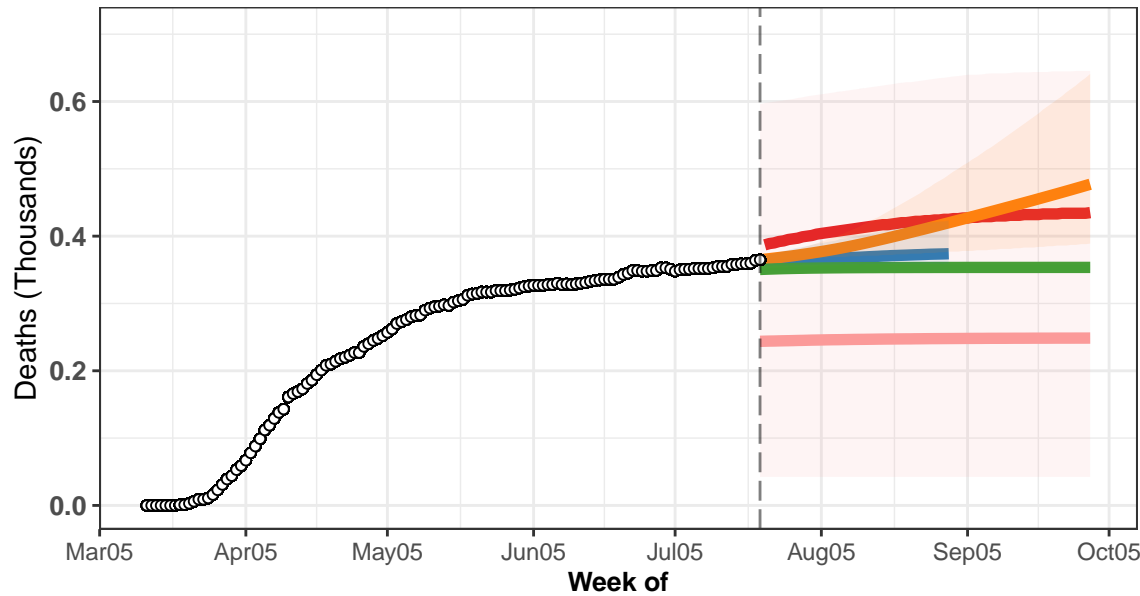

## Cumulative Out-Of-Sample Error (Post Intercept Shift)

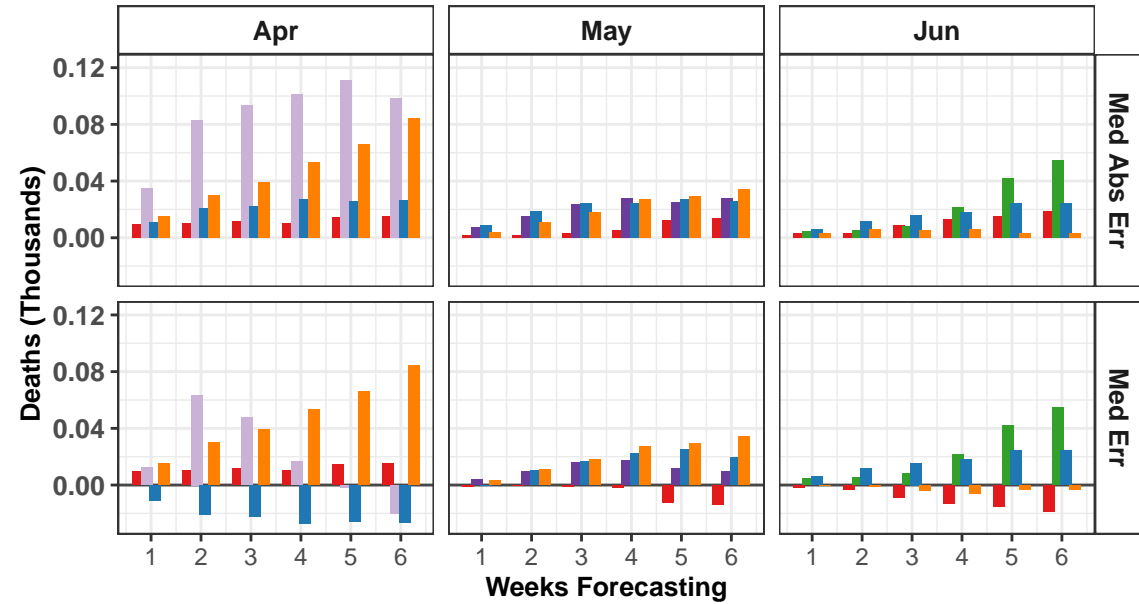

## All Model Versions

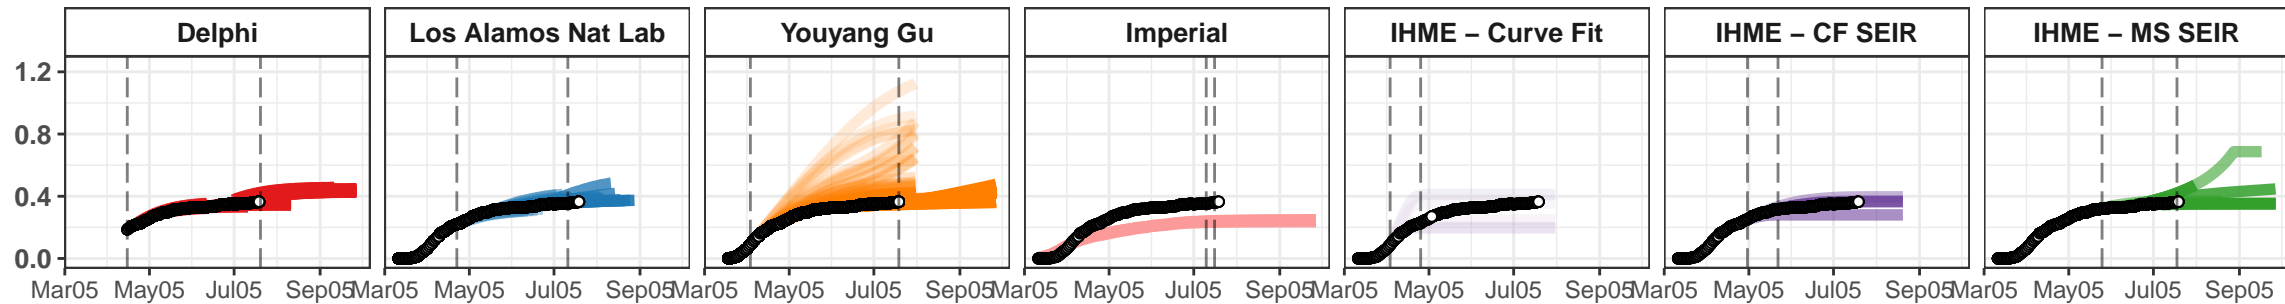

## All Cumulative Errors

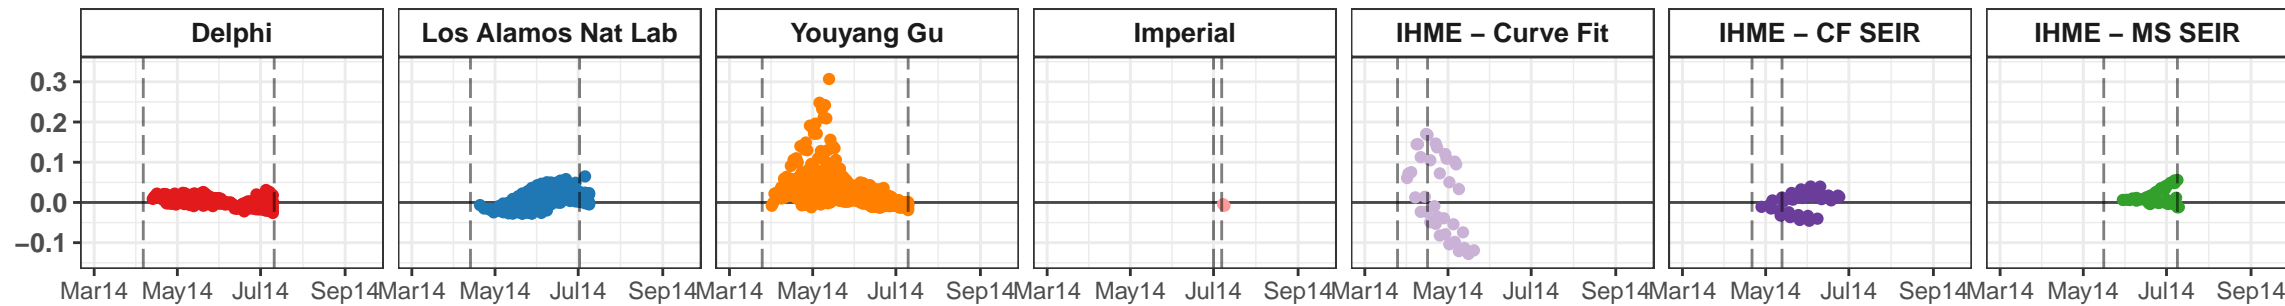

# Oman

## Current Forecast

Delphi Los Alamos Nat Lab Imperial IHME – MS SEIR

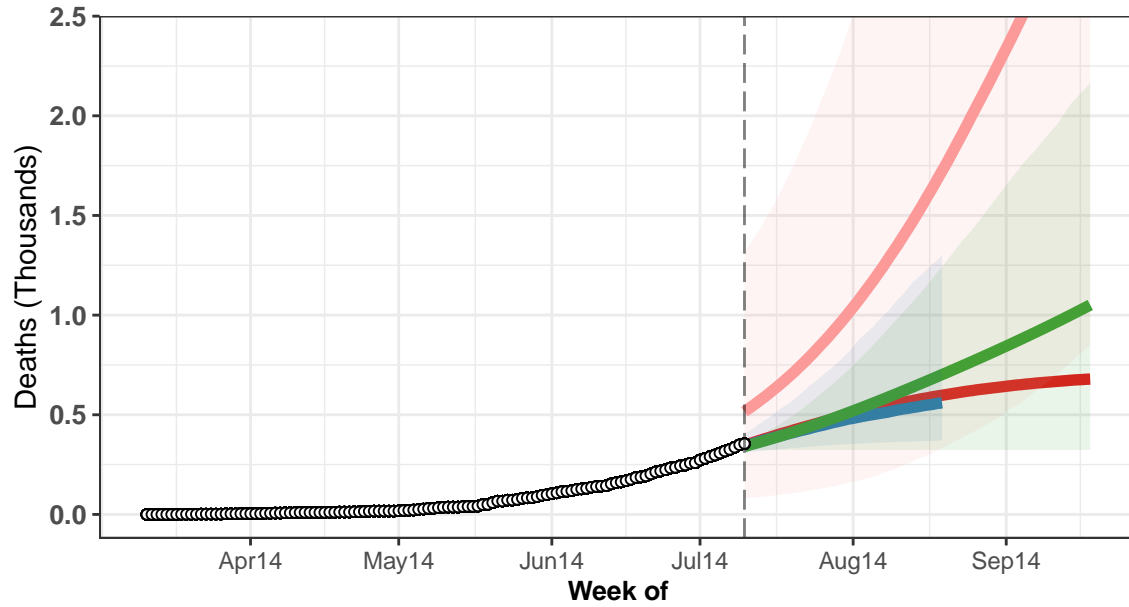

## Cumulative Out-Of-Sample Error (Post Intercept Shift)

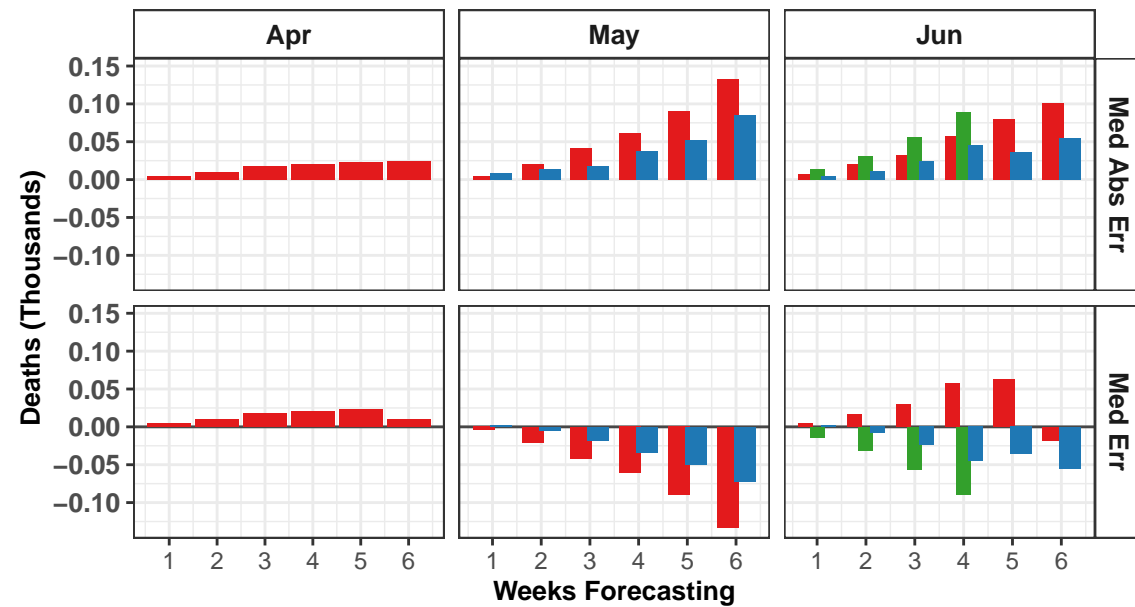

## All Model Versions

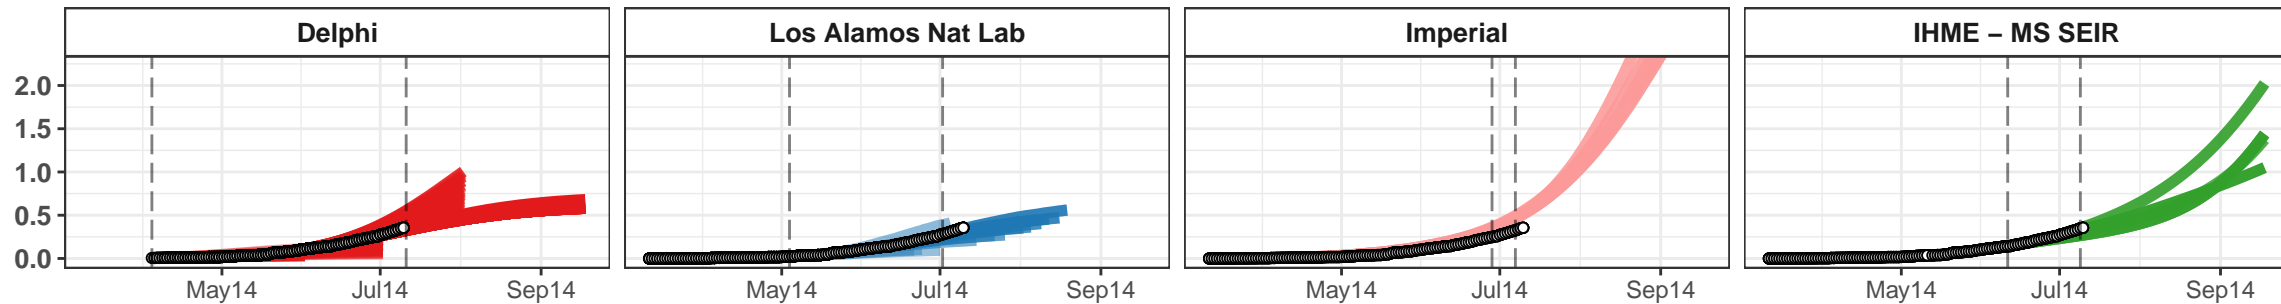

## All Cumulative Errors

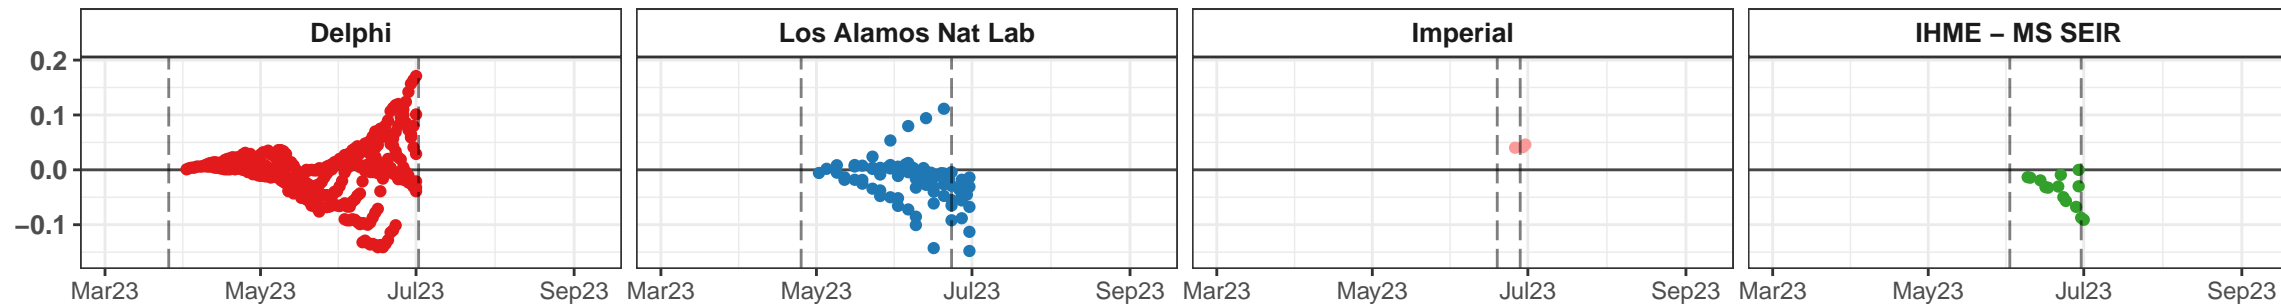

# United Arab Emirates

## Current Forecast

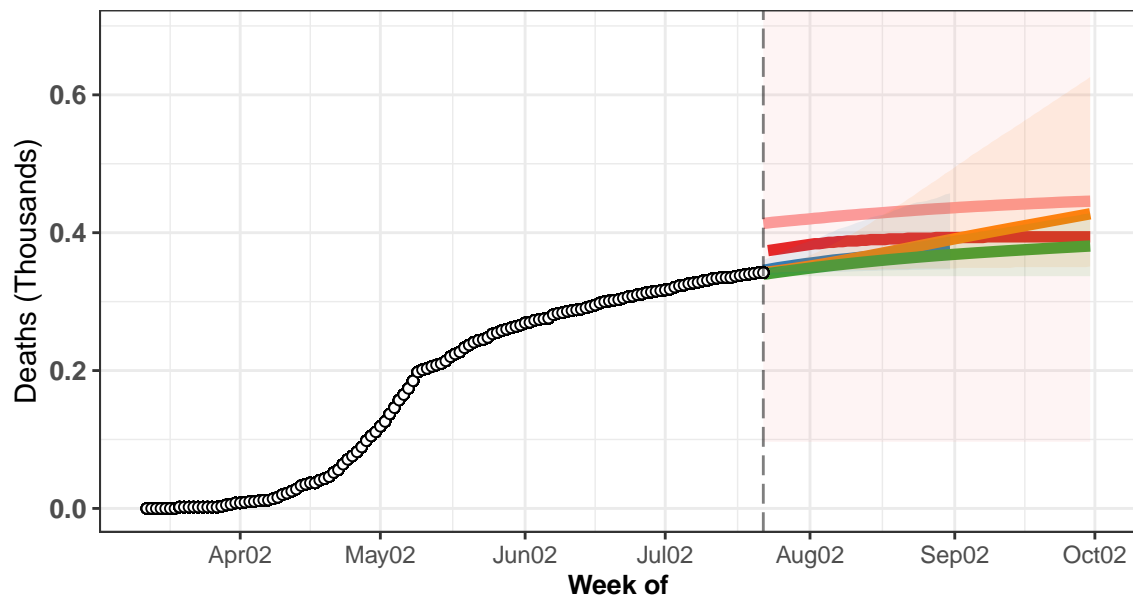

## Cumulative Out-Of-Sample Error (Post Intercept Shift)

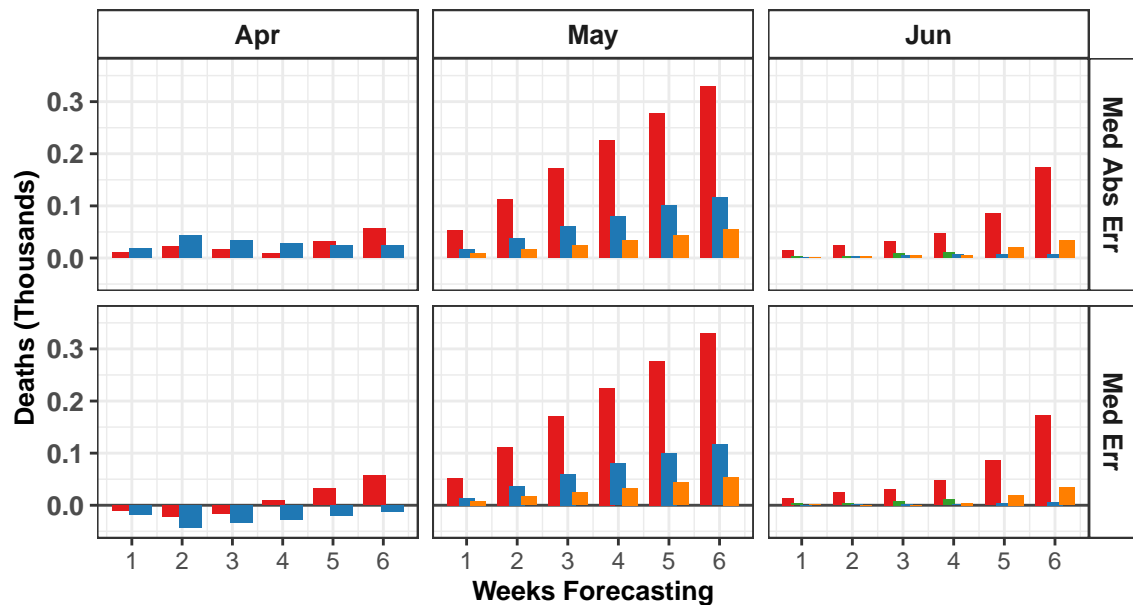

## All Model Versions

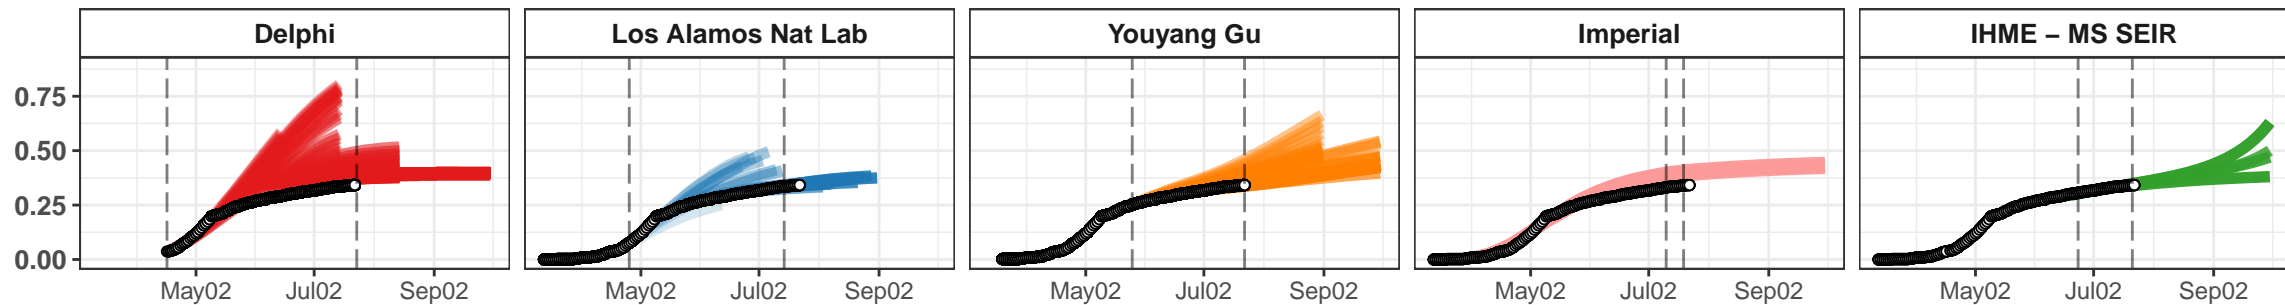

## All Cumulative Errors

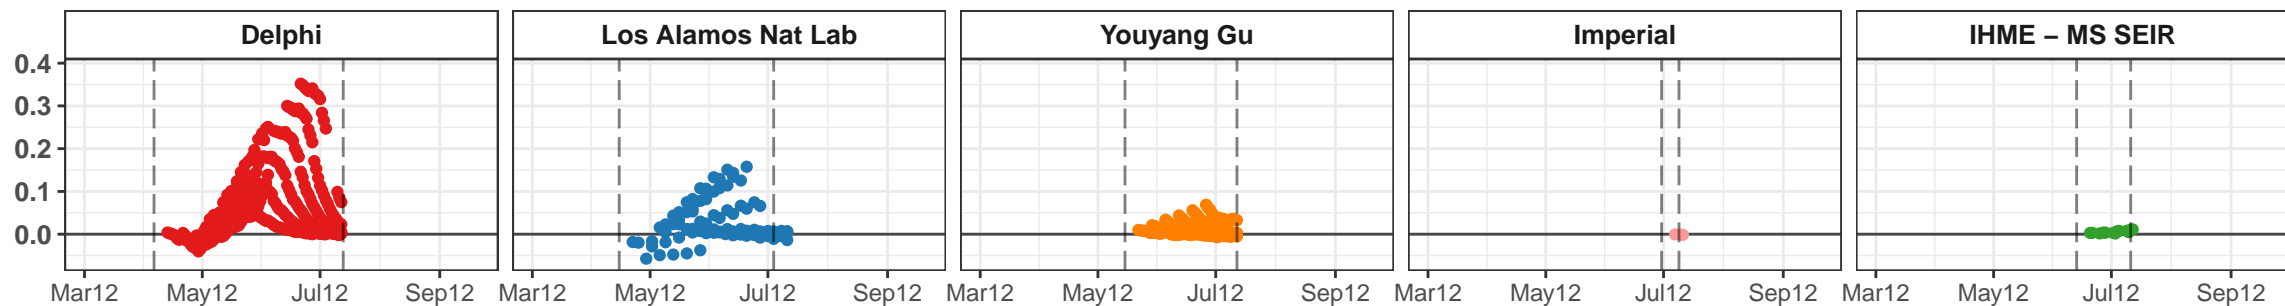



# Bulgaria

## Current Forecast

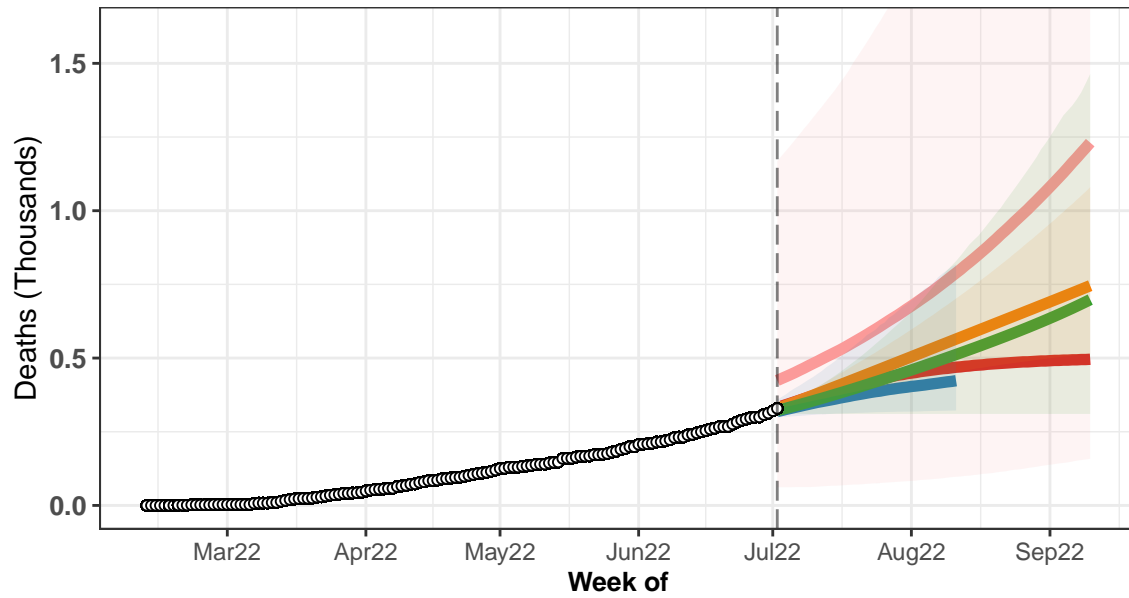

## Cumulative Out-Of-Sample Error (Post Intercept Shift)

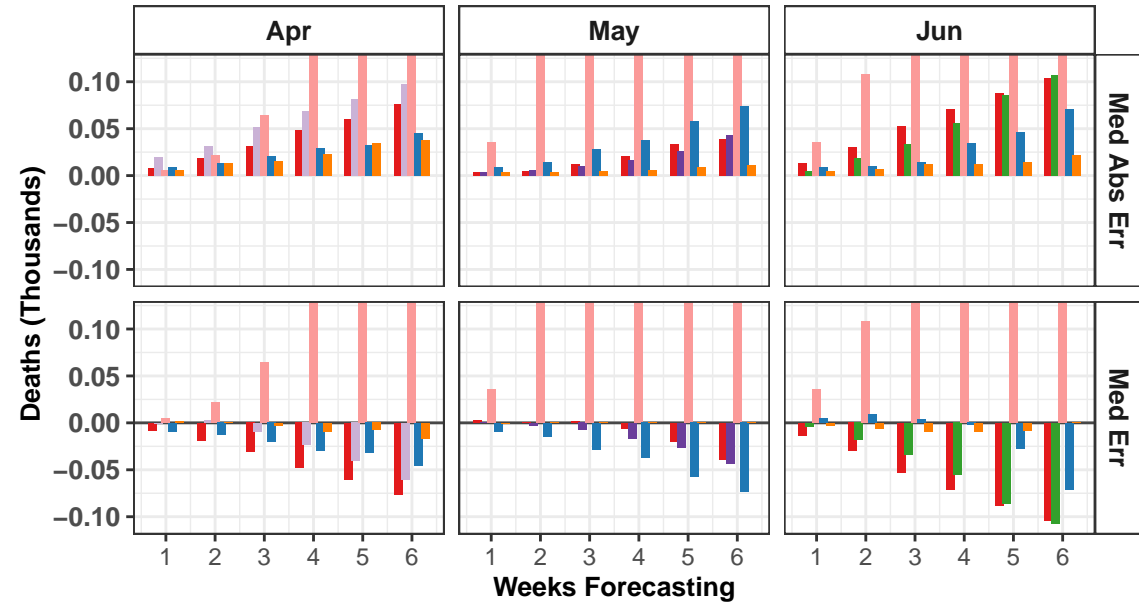

## All Model Versions

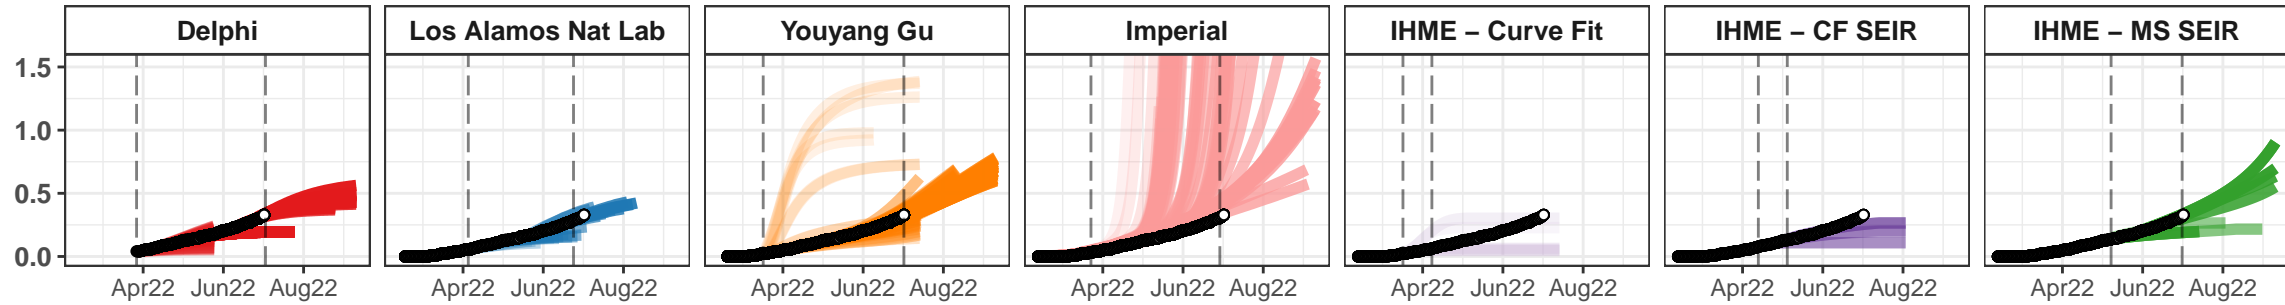

## All Cumulative Errors

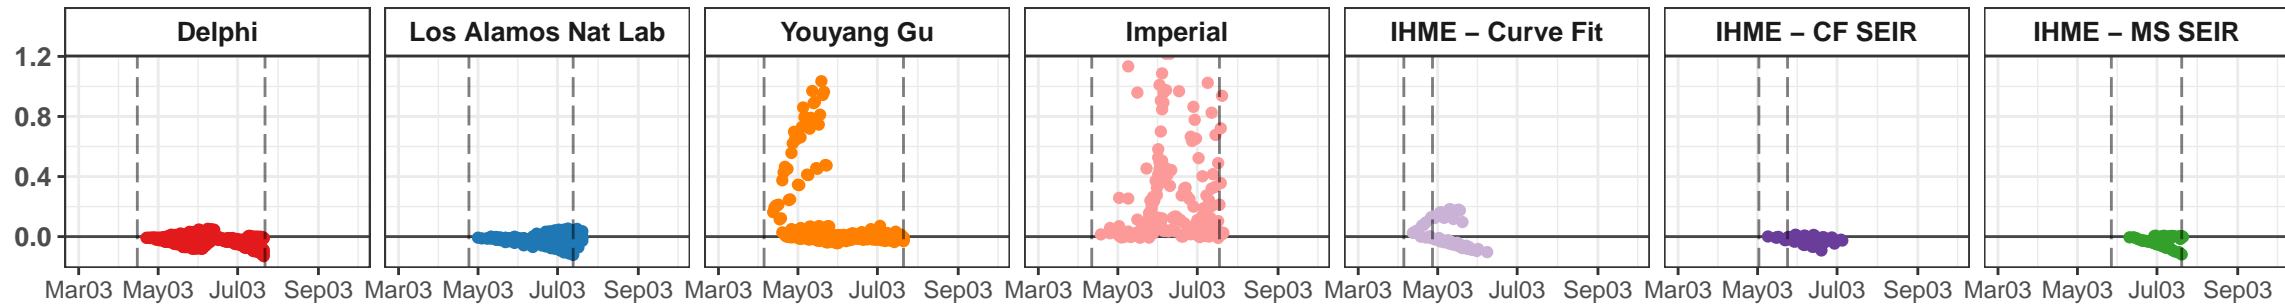

# Finland

## Current Forecast

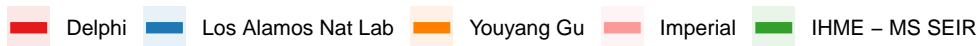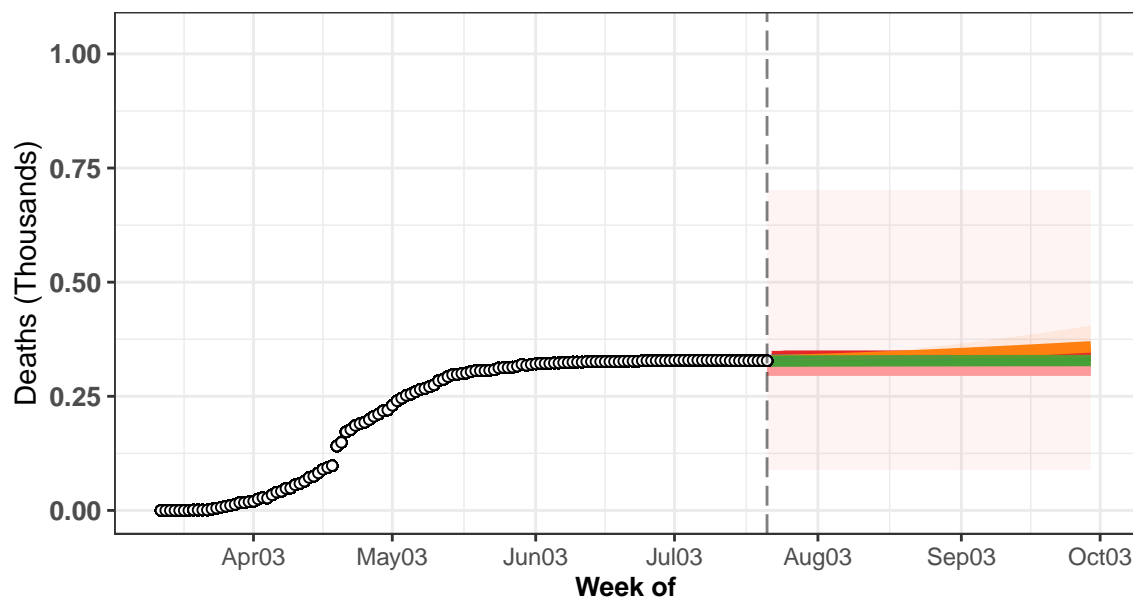

## Cumulative Out-Of-Sample Error (Post Intercept Shift)

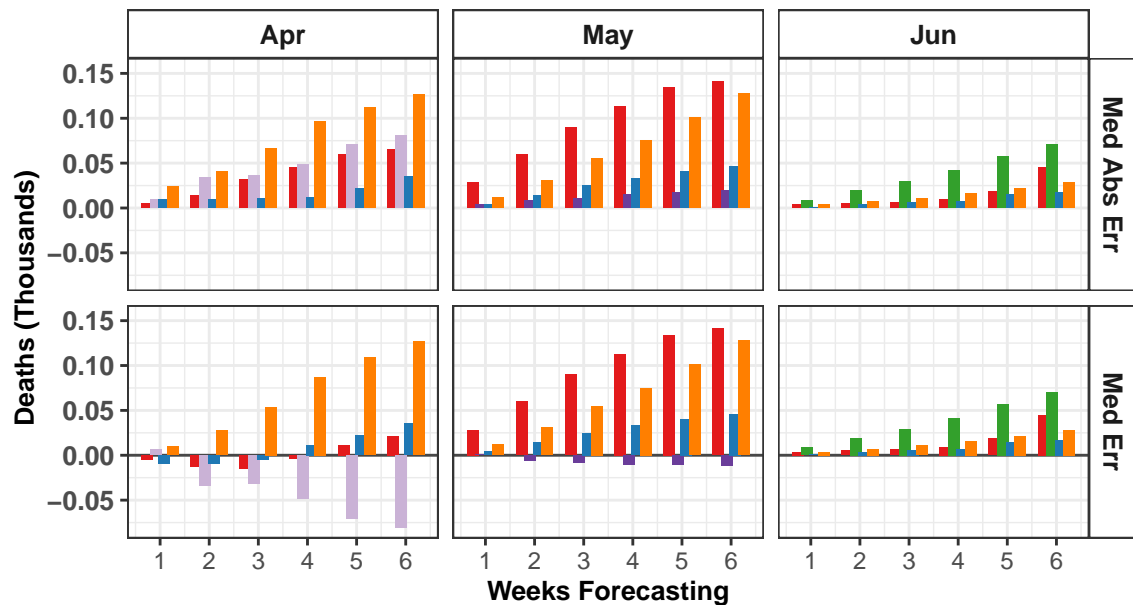

## All Model Versions

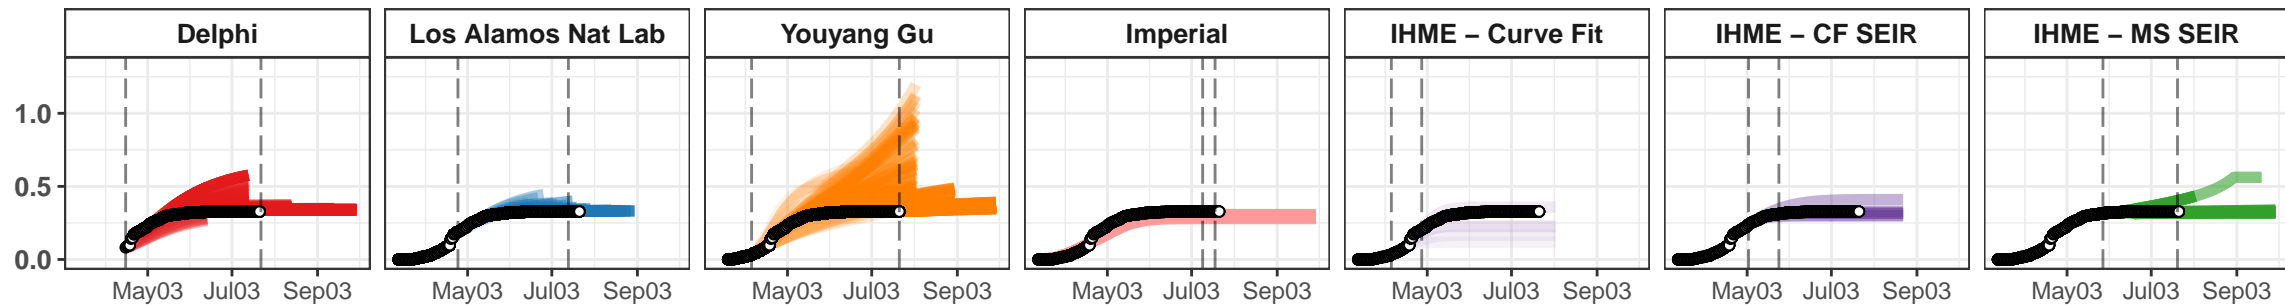

## All Cumulative Errors

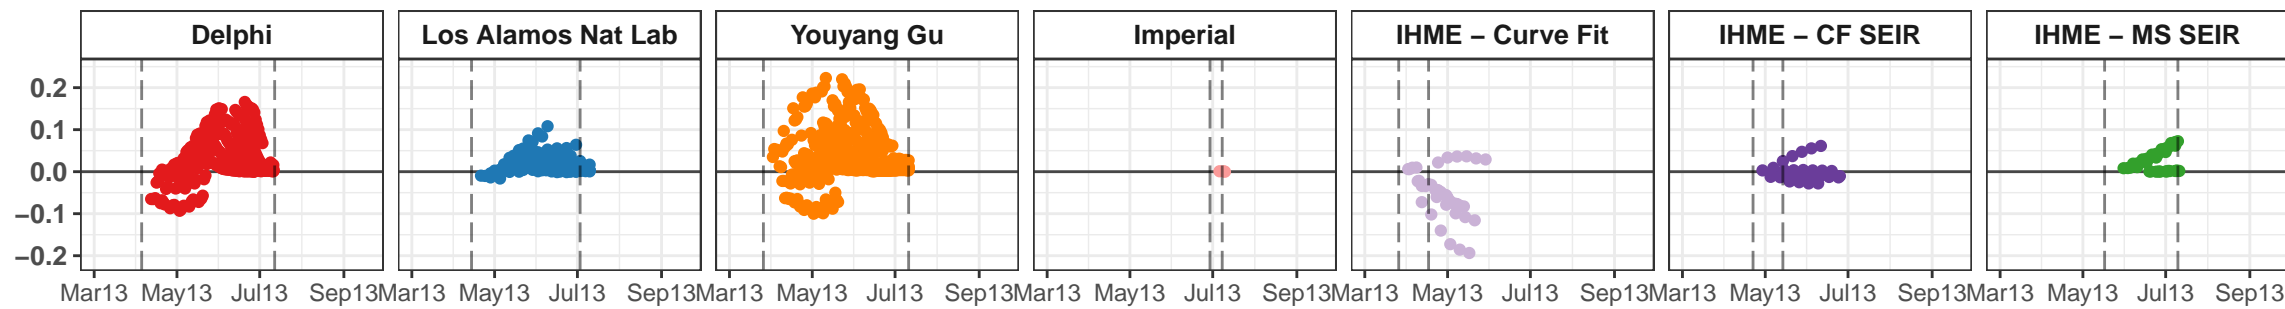

# Kansas

## Current Forecast

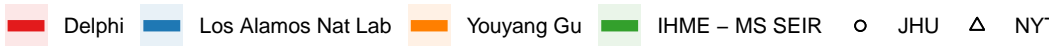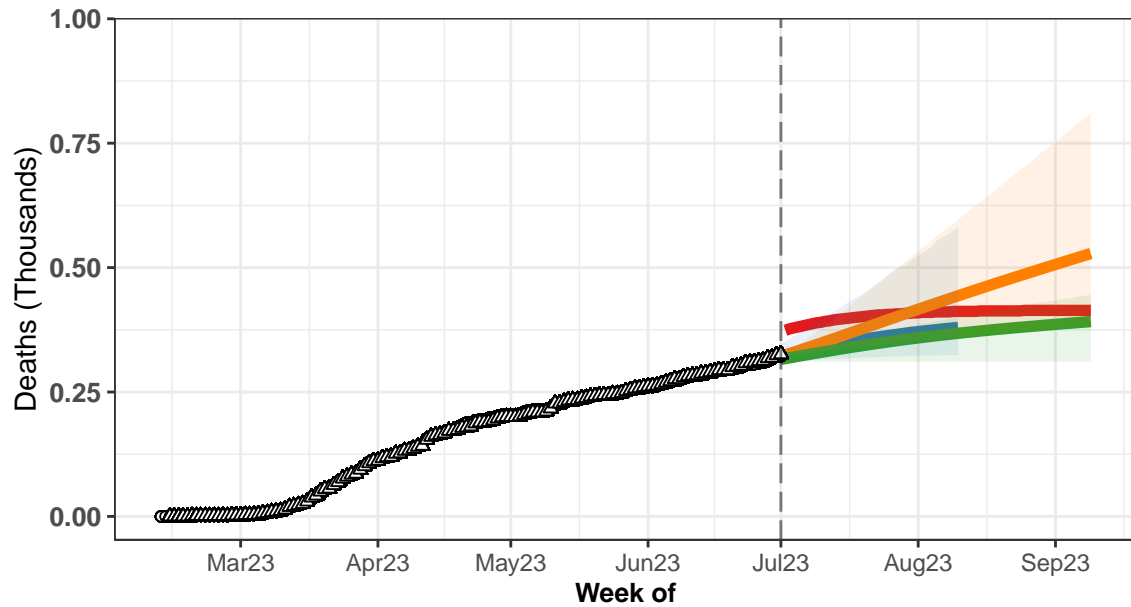

## Cumulative Out-Of-Sample Error (Post Intercept Shift)

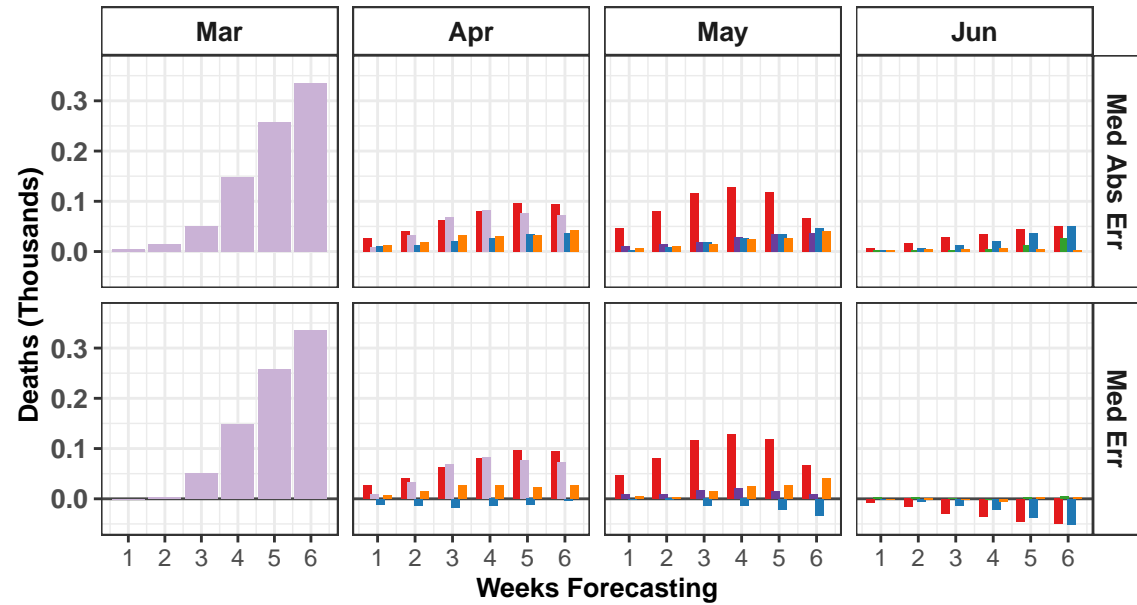

## All Model Versions

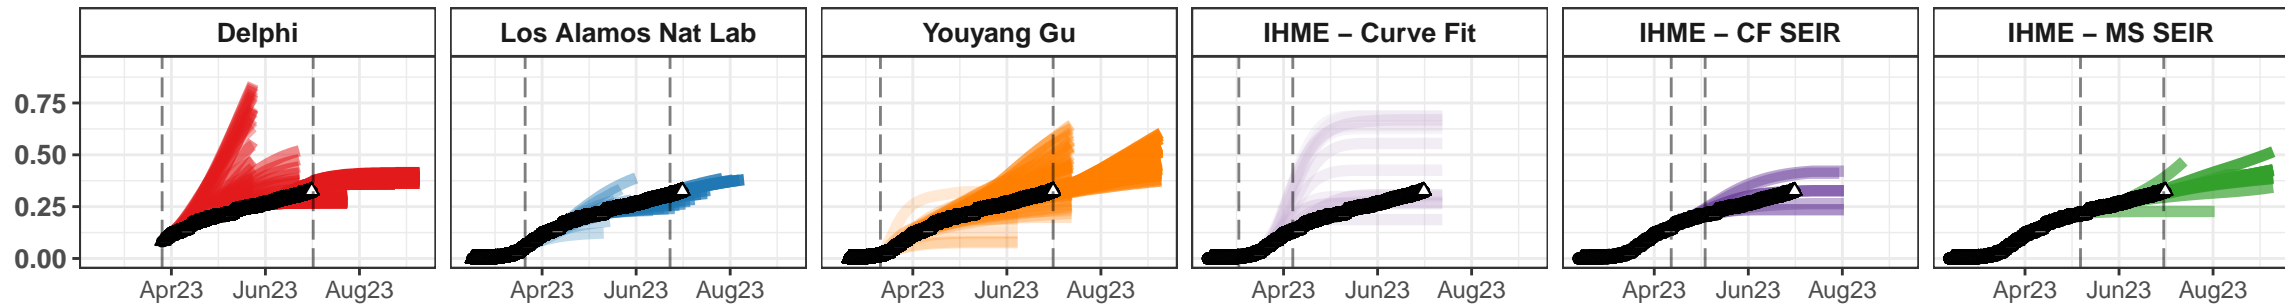

## All Cumulative Errors

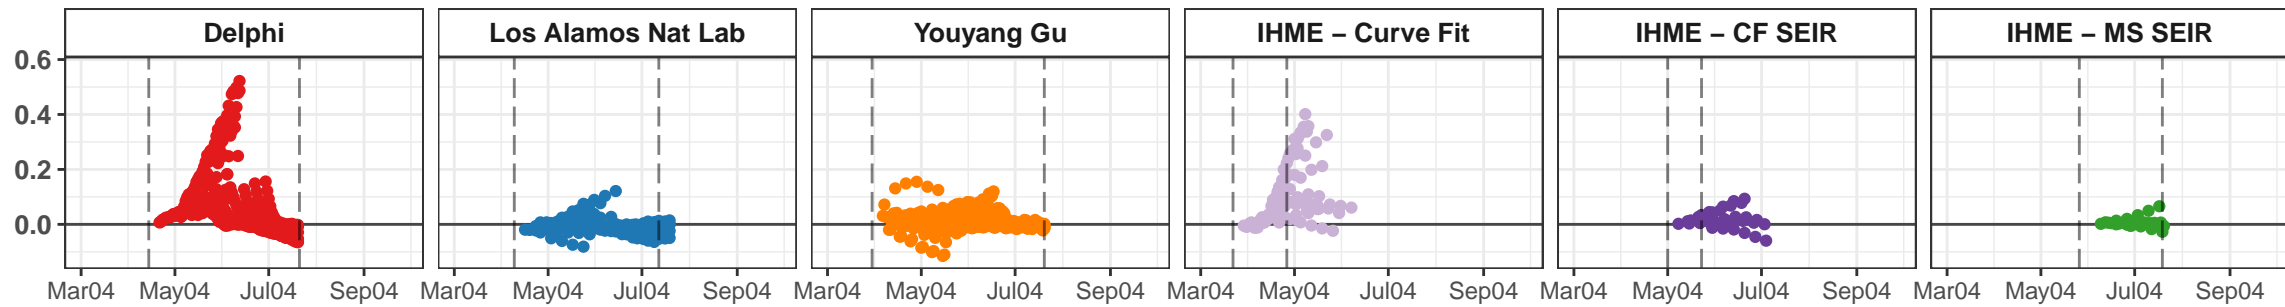

# Nebraska

## Current Forecast

■ Delphi 
 ■ Los Alamos Nat Lab 
 ■ Youyang Gu 
 ■ IHME - MS SEIR 
 ○ JHU 
 △ NY

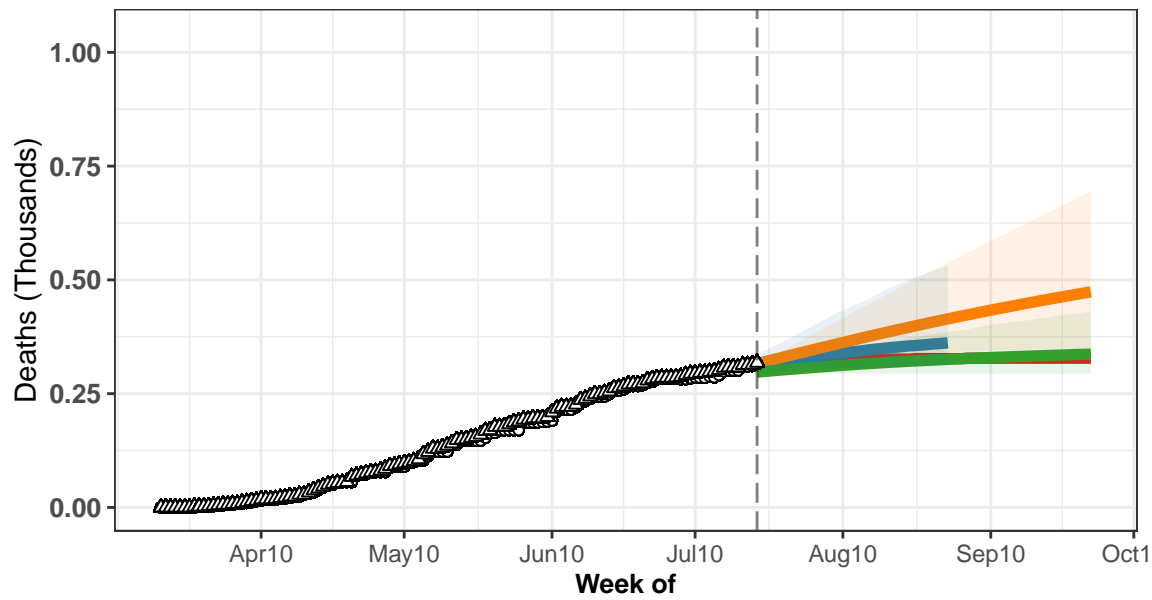

## Cumulative Out-Of-Sample Error (Post Intercept Shift)

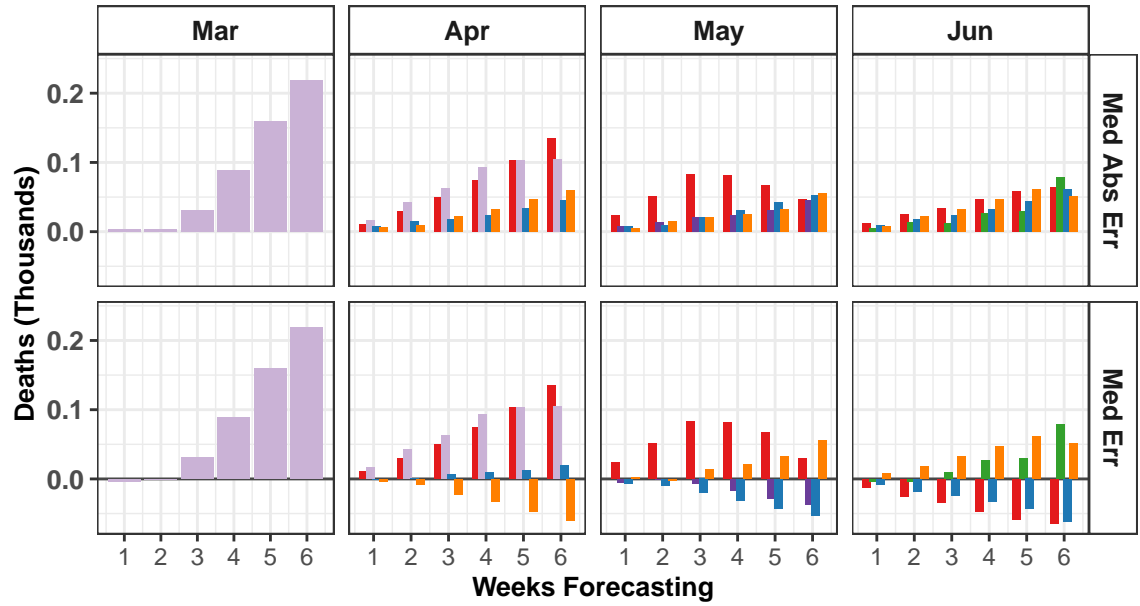

## All Model Versions

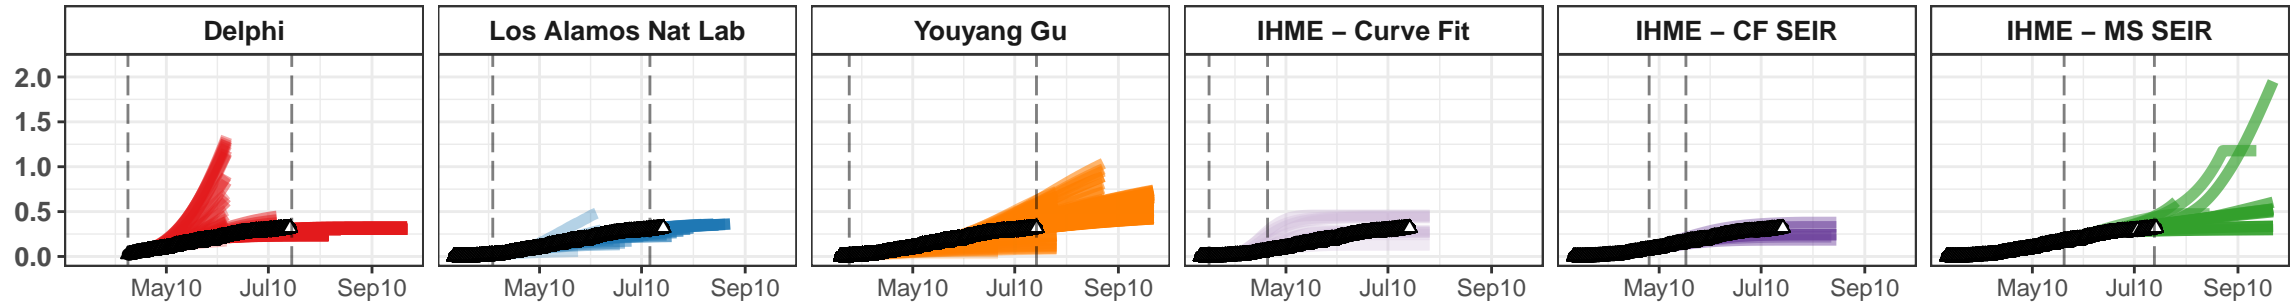

## All Cumulative Errors

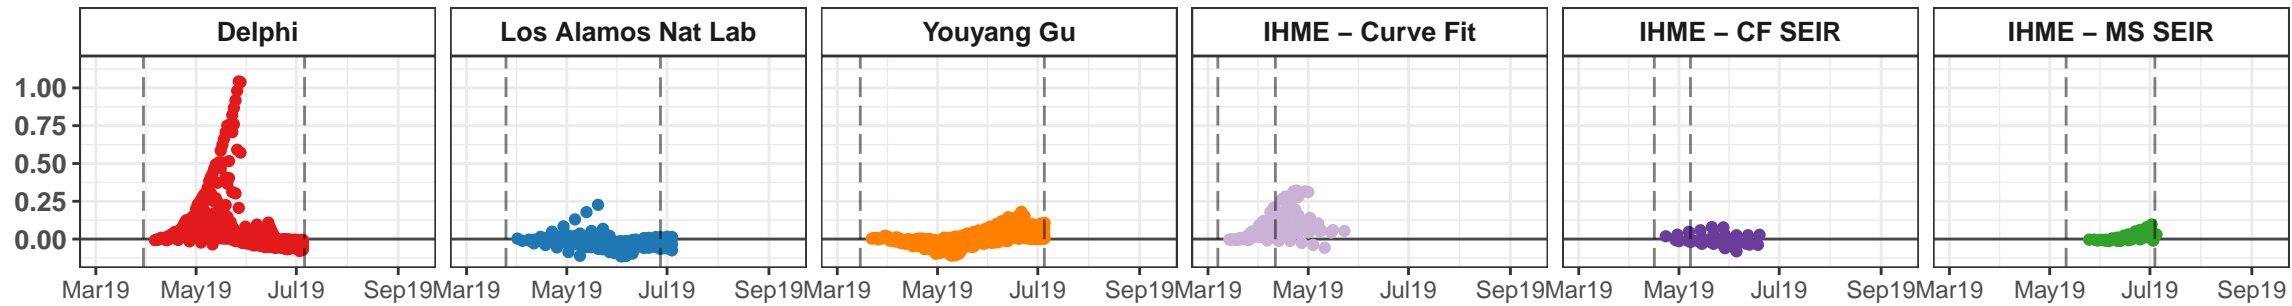

# South Korea

## Current Forecast

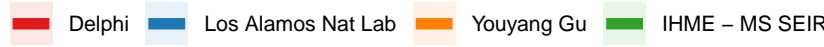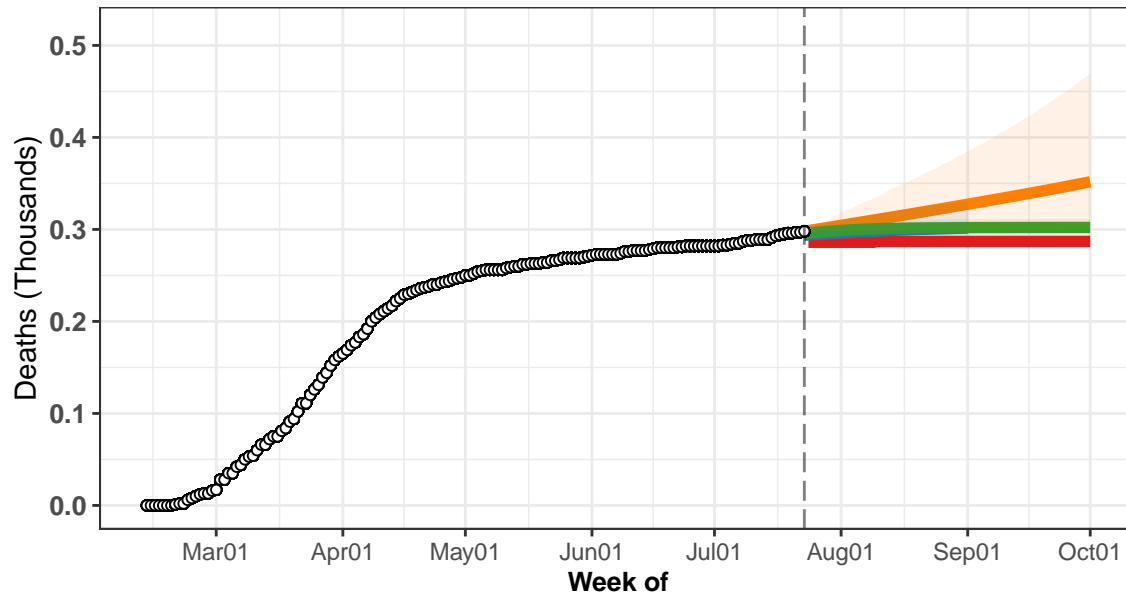

## Cumulative Out-Of-Sample Error (Post Intercept Shift)

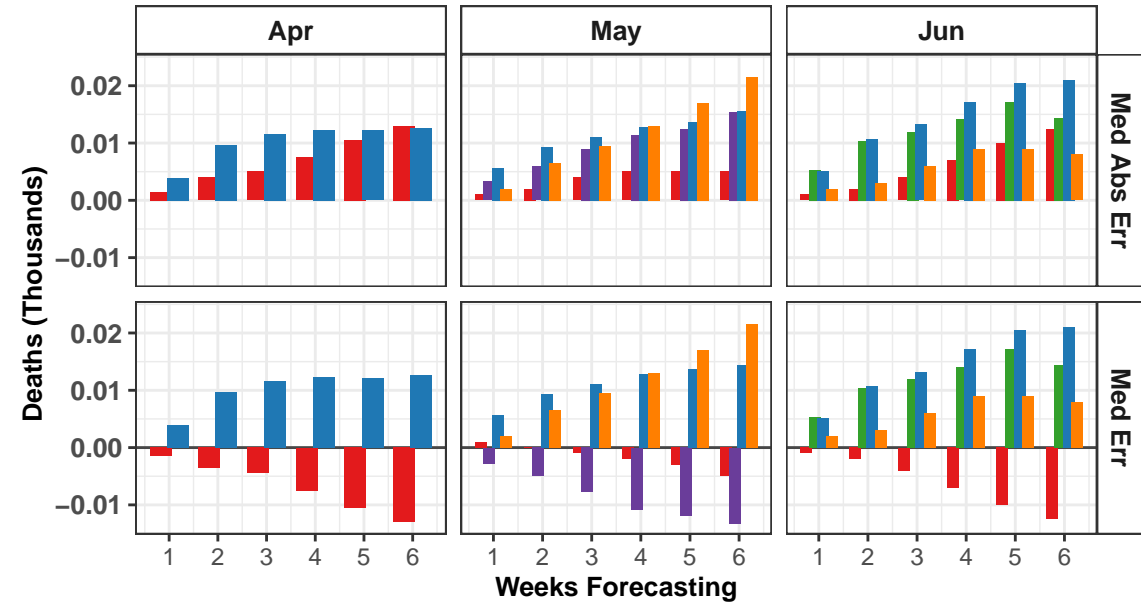

## All Model Versions

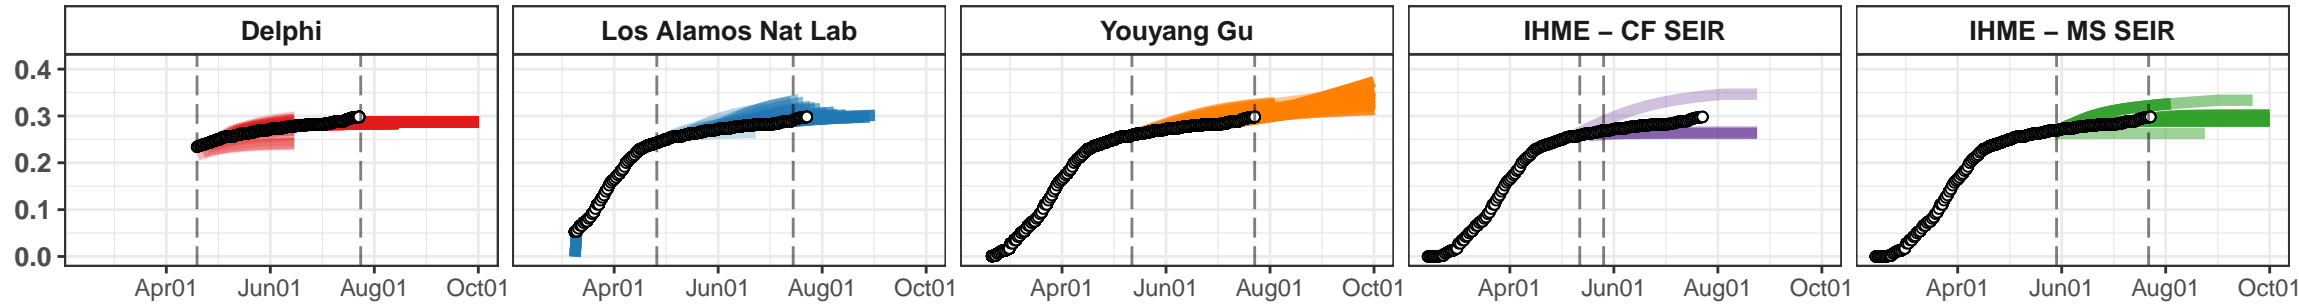

## All Cumulative Errors

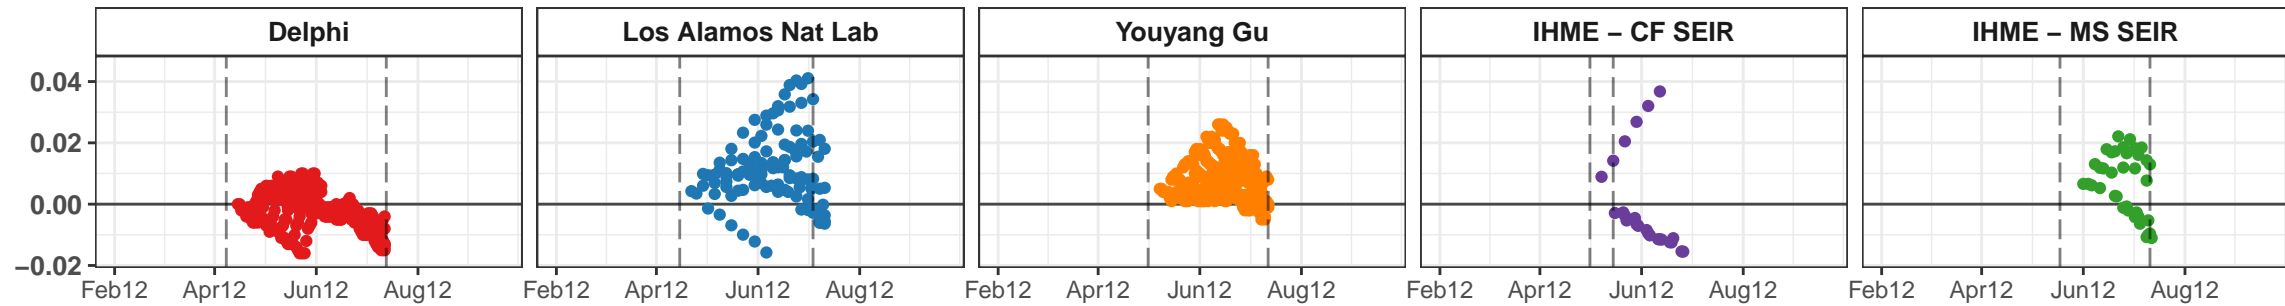

# Morocco

## Current Forecast

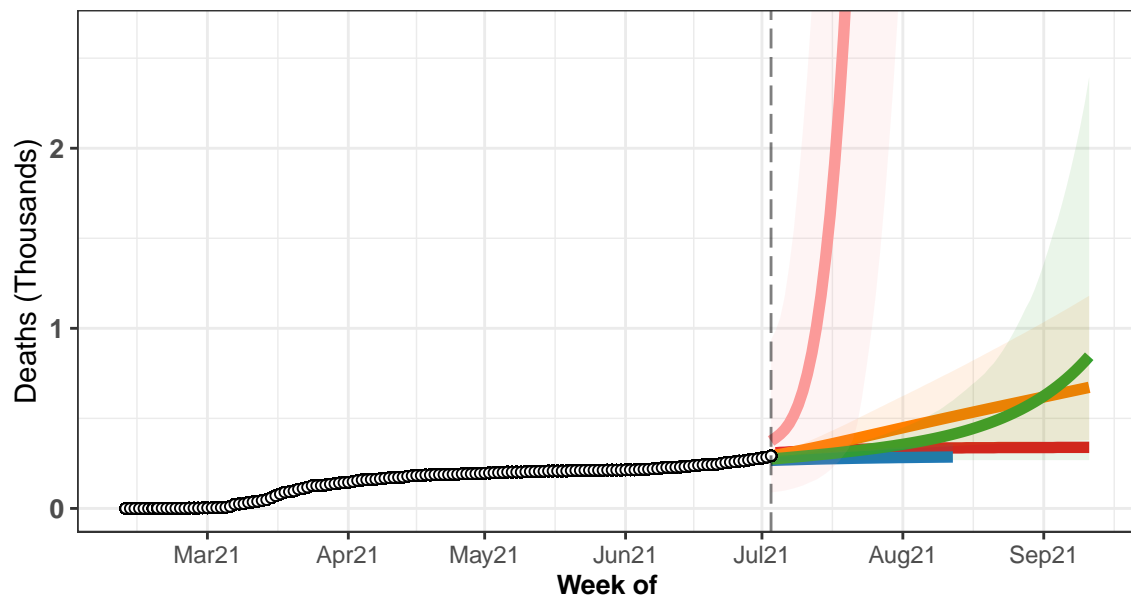

## Cumulative Out-Of-Sample Error (Post Intercept Shift)

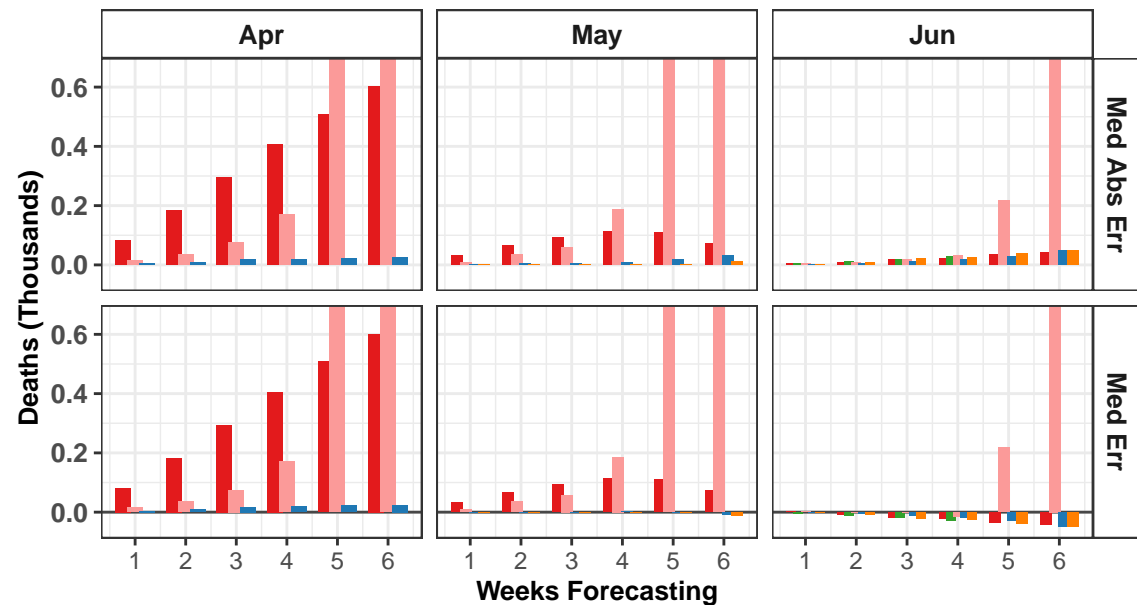

## All Model Versions

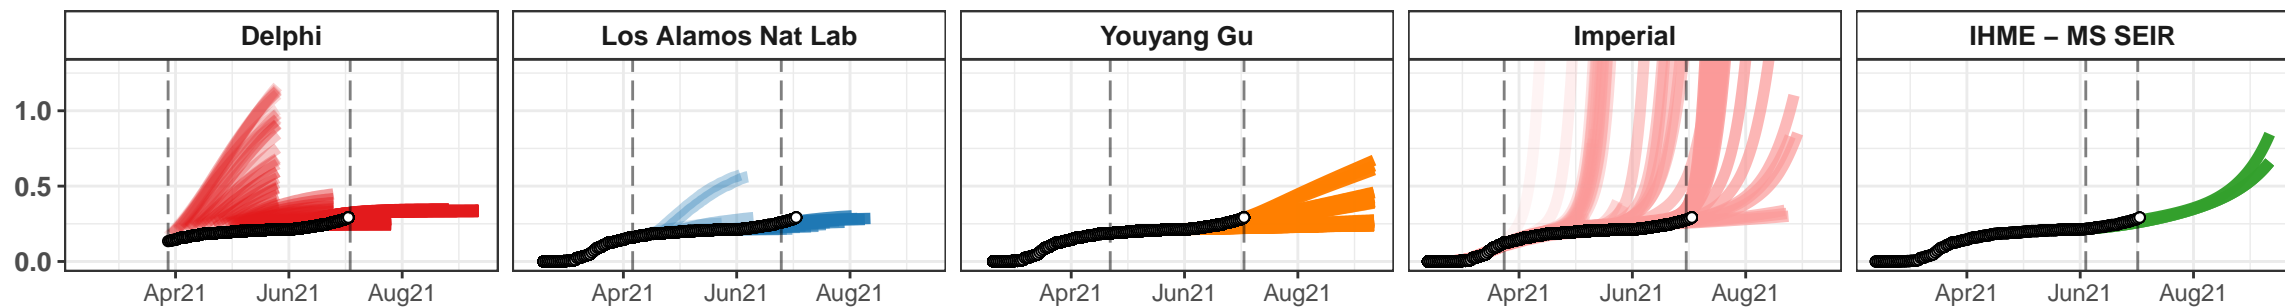

## All Cumulative Errors

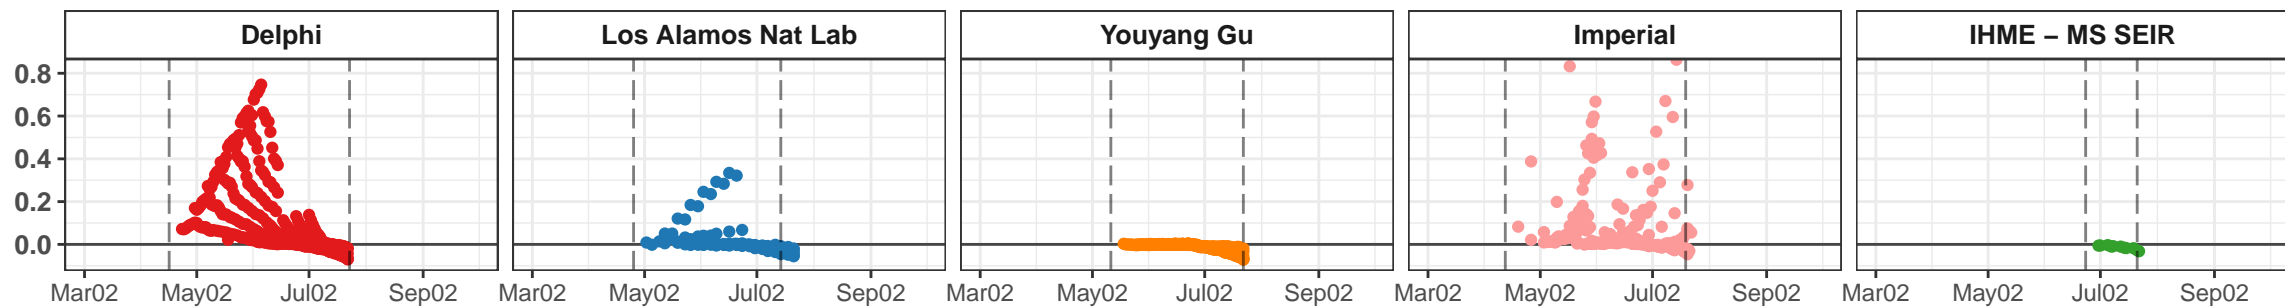

# Oregon

## Current Forecast

Delphi Los Alamos Nat Lab Youyang Gu IHME – MS SEIR ○ JHU △ NYT

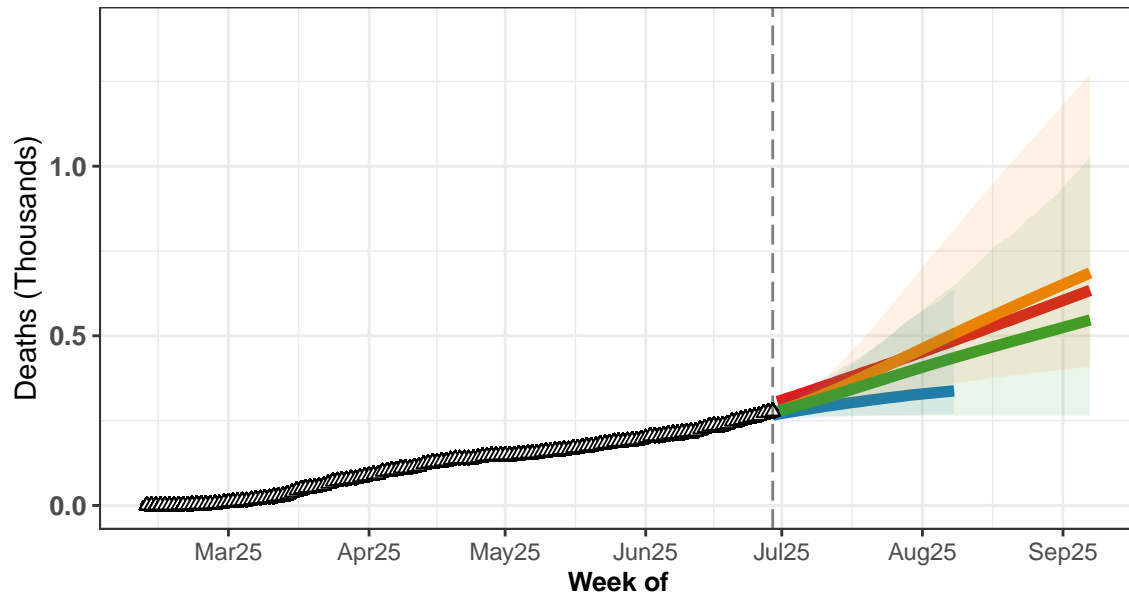

## Cumulative Out-Of-Sample Error (Post Intercept Shift)

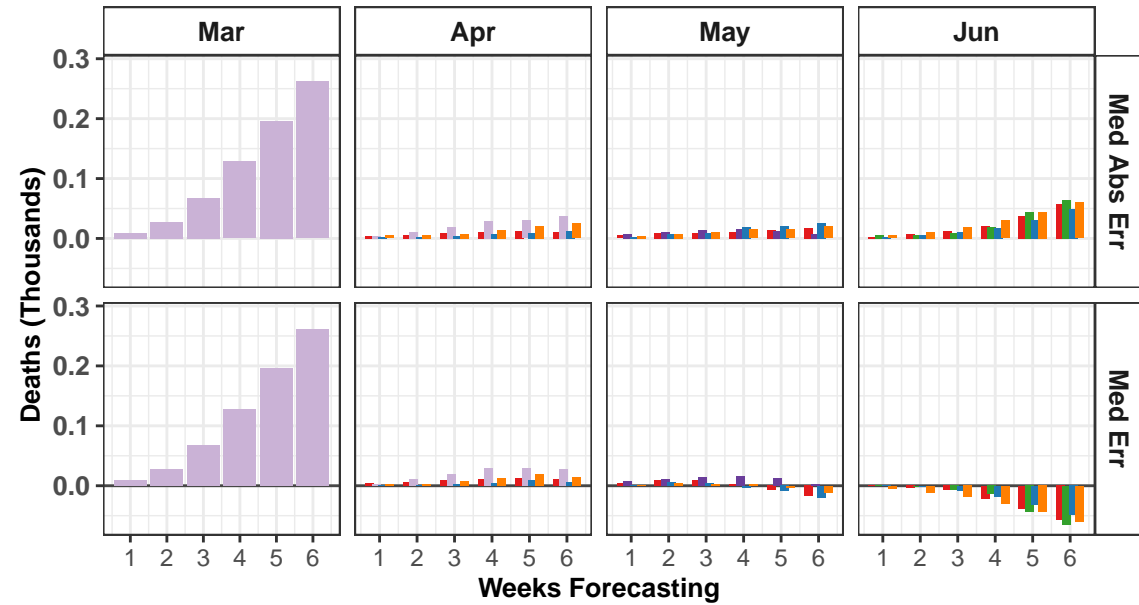

## All Model Versions

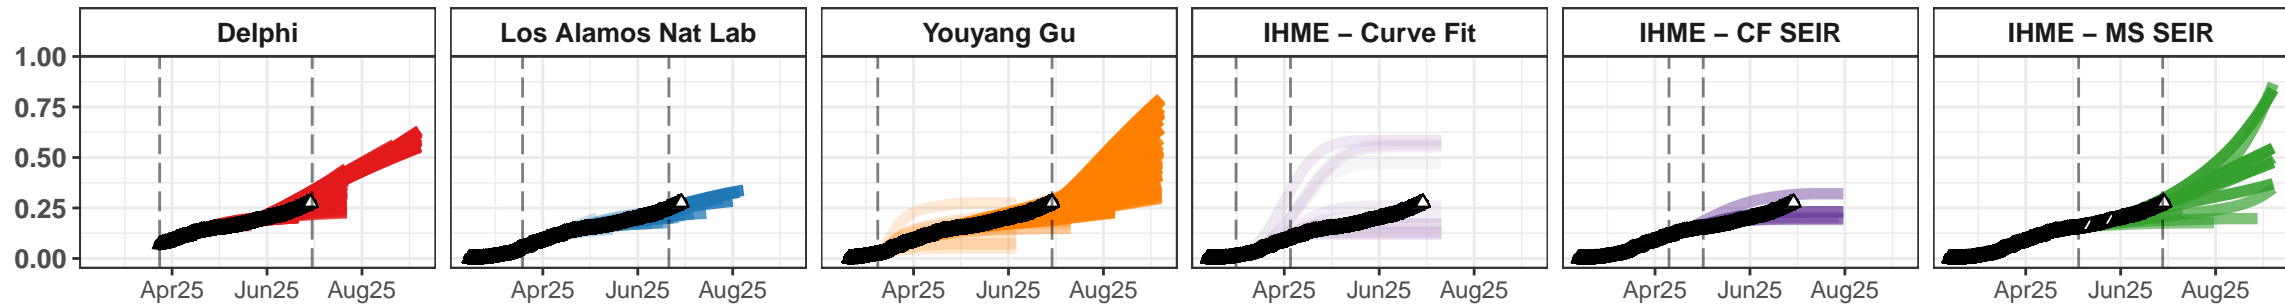

## All Cumulative Errors

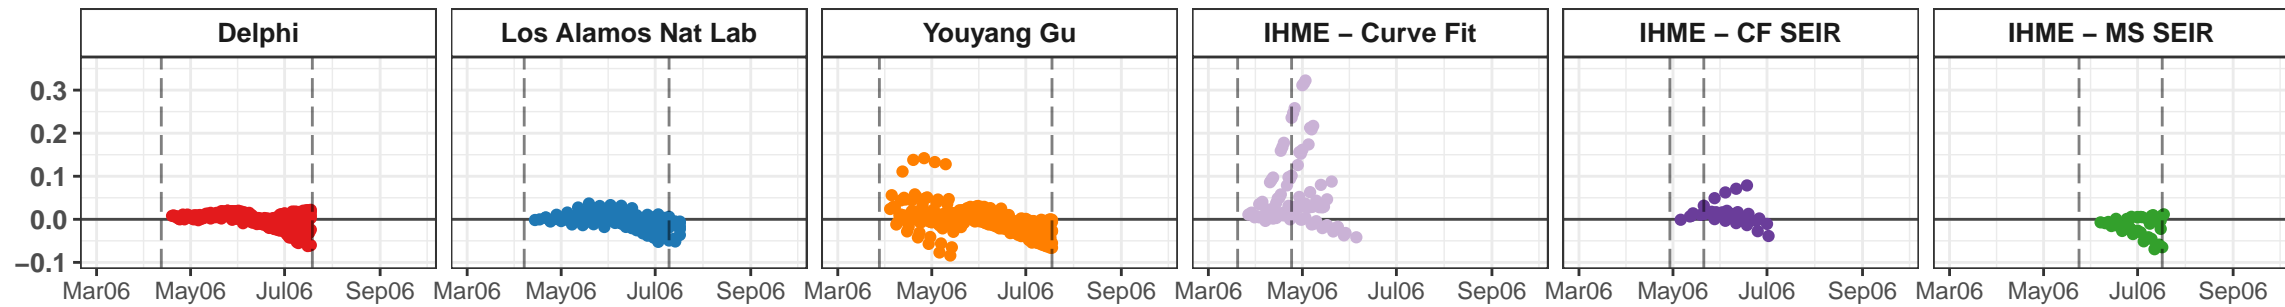

# Bosnia and Herzegovina

## Current Forecast

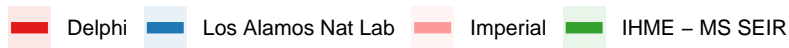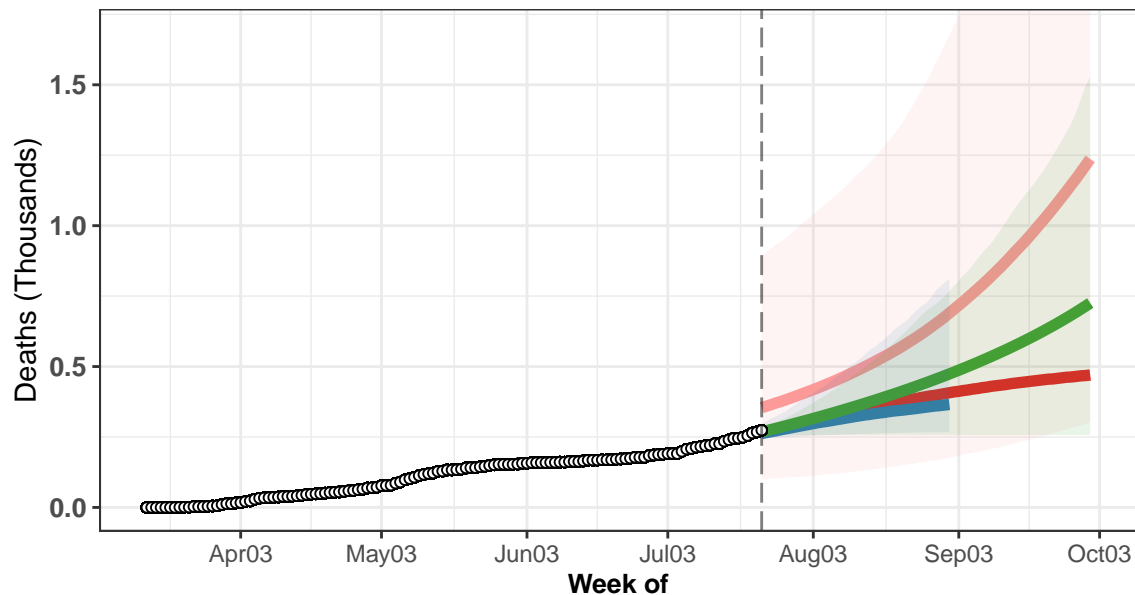

## Cumulative Out-Of-Sample Error (Post Intercept Shift)

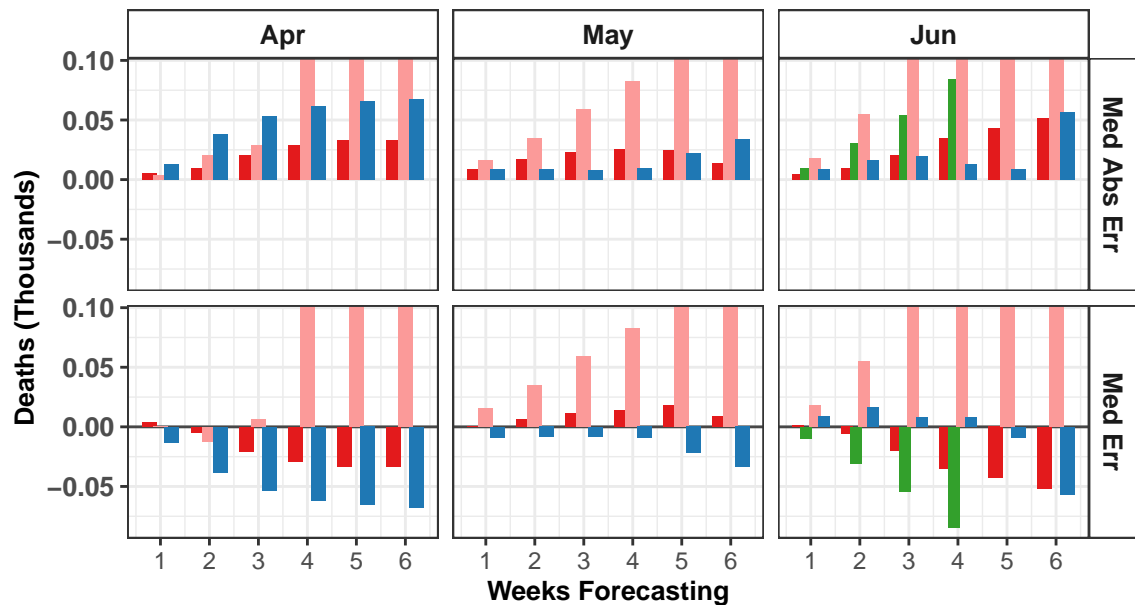

## All Model Versions

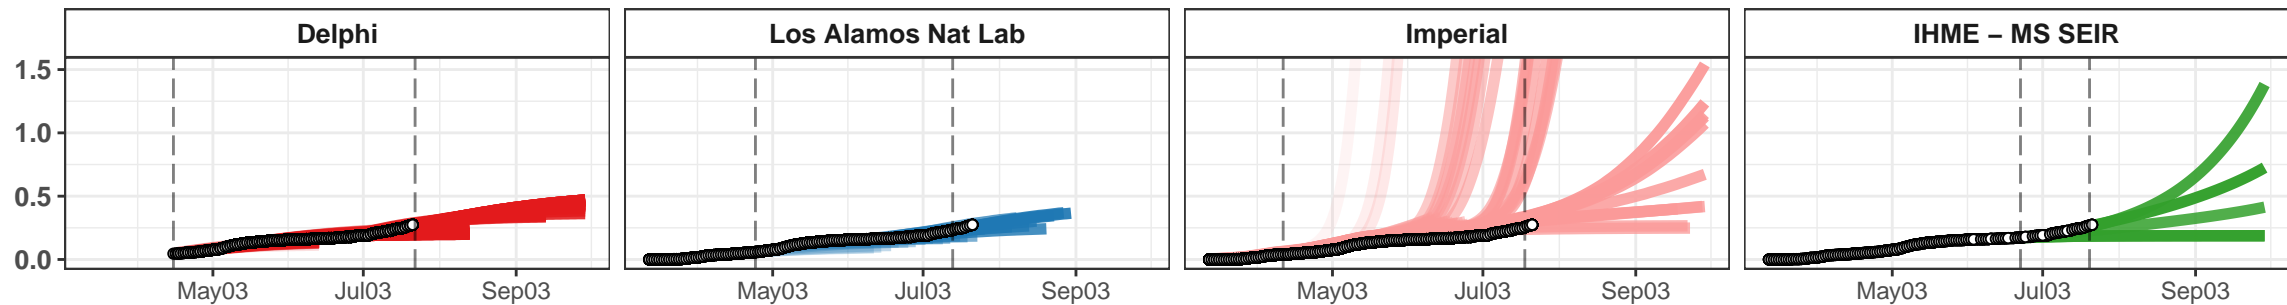

## All Cumulative Errors

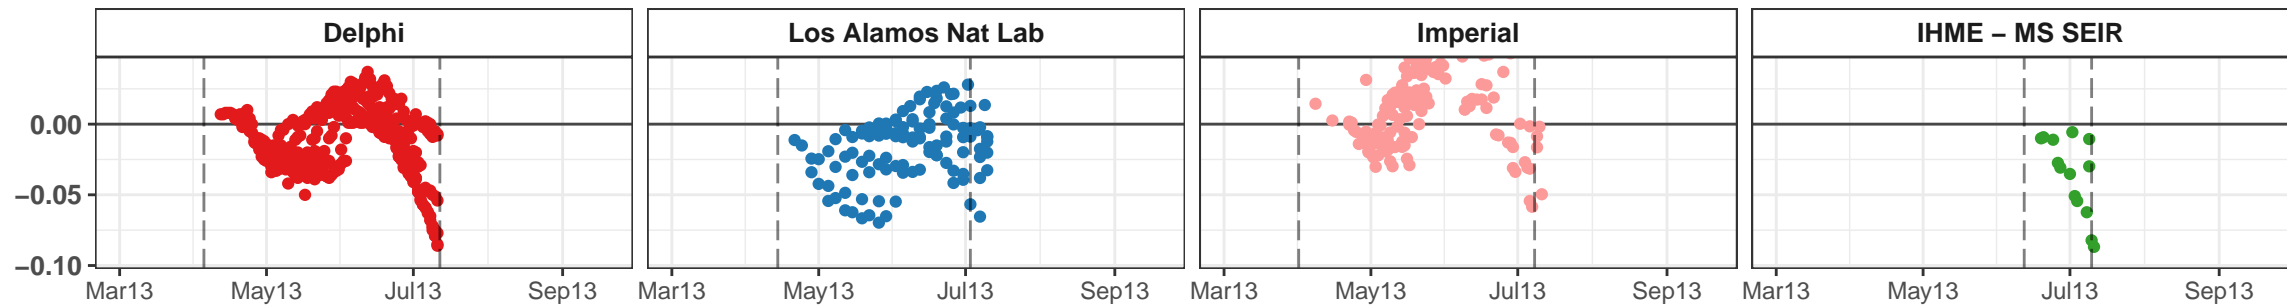



# Utah

## Current Forecast

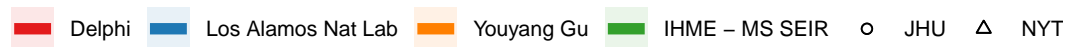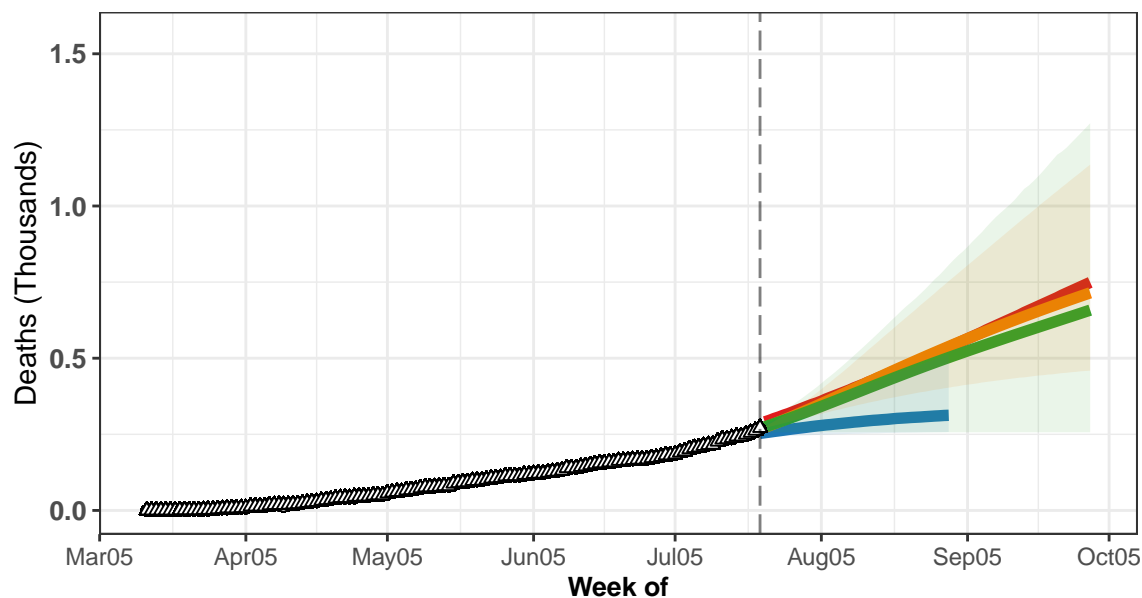

## Cumulative Out-Of-Sample Error (Post Intercept Shift)

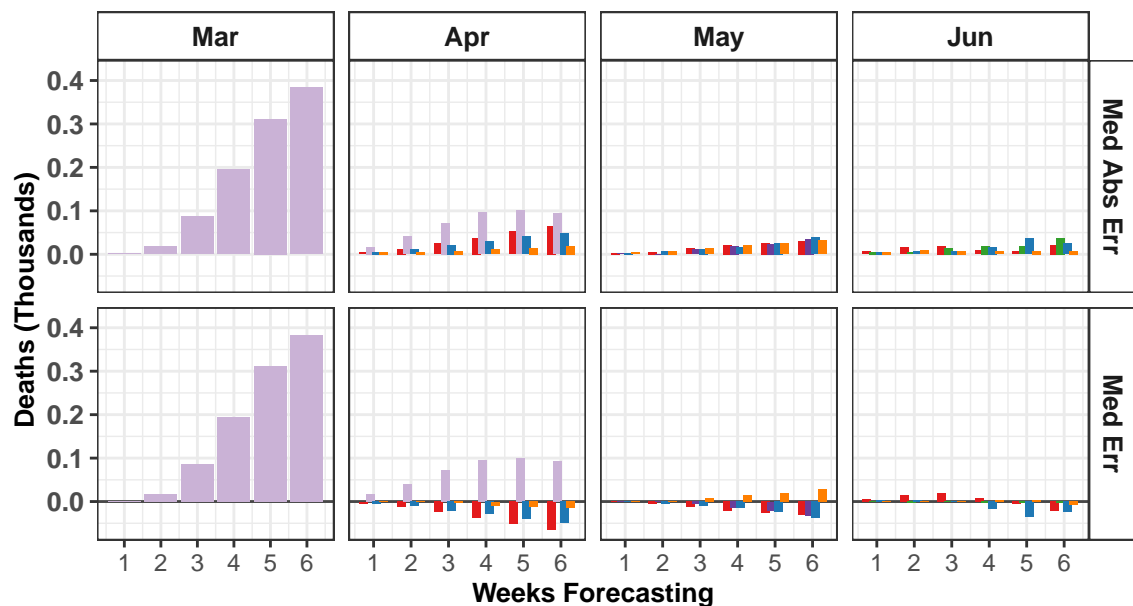

## All Model Versions

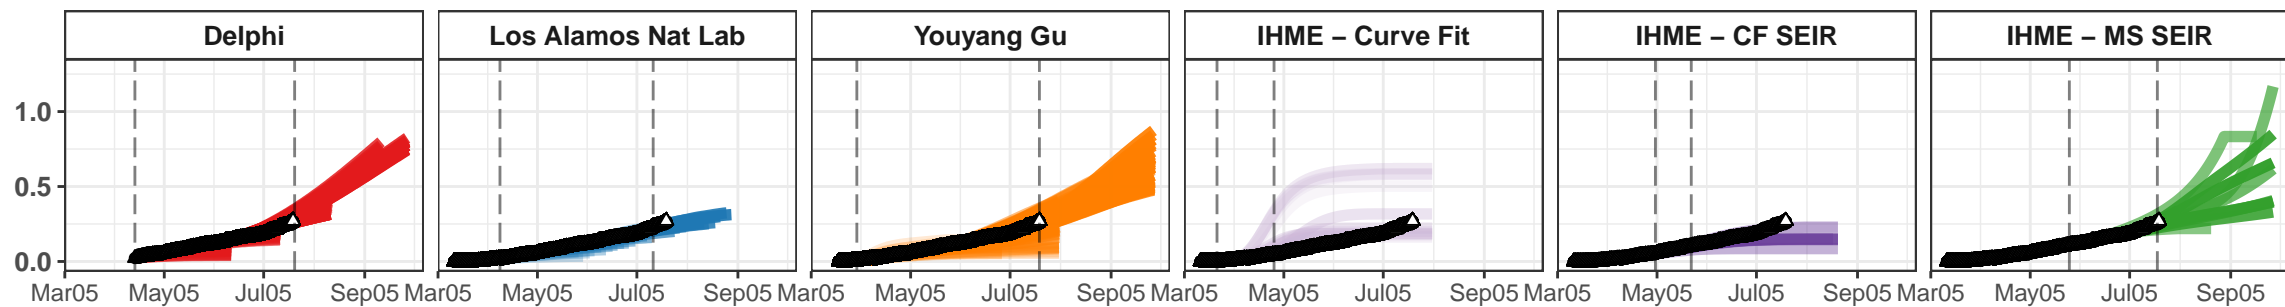

## All Cumulative Errors

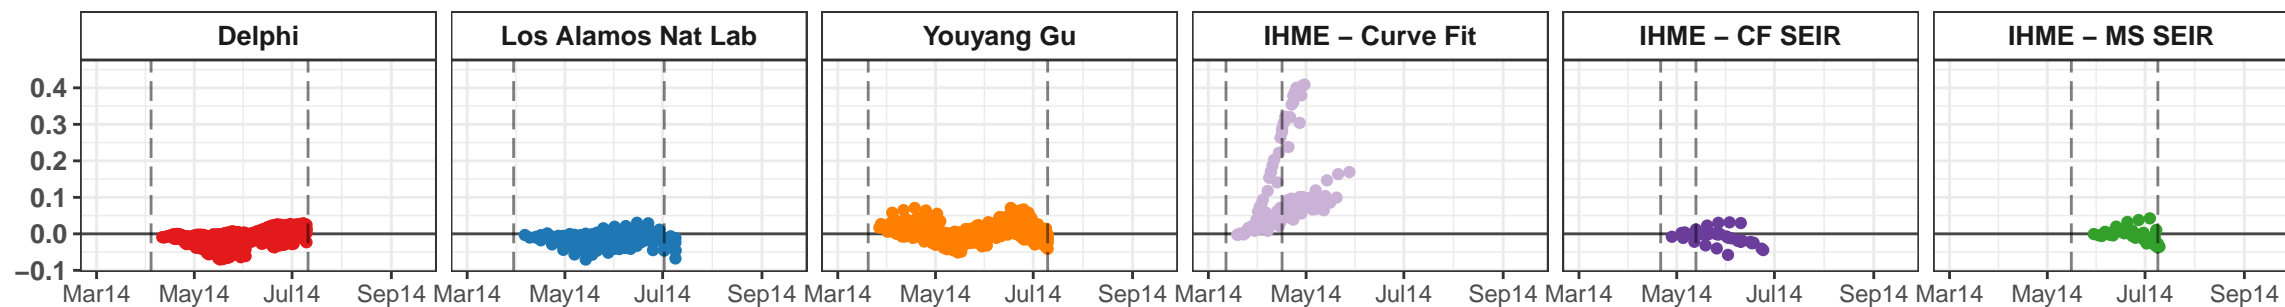

# Kenya

## Current Forecast

Delphi Los Alamos Nat Lab Imperial IHME – MS SEIR

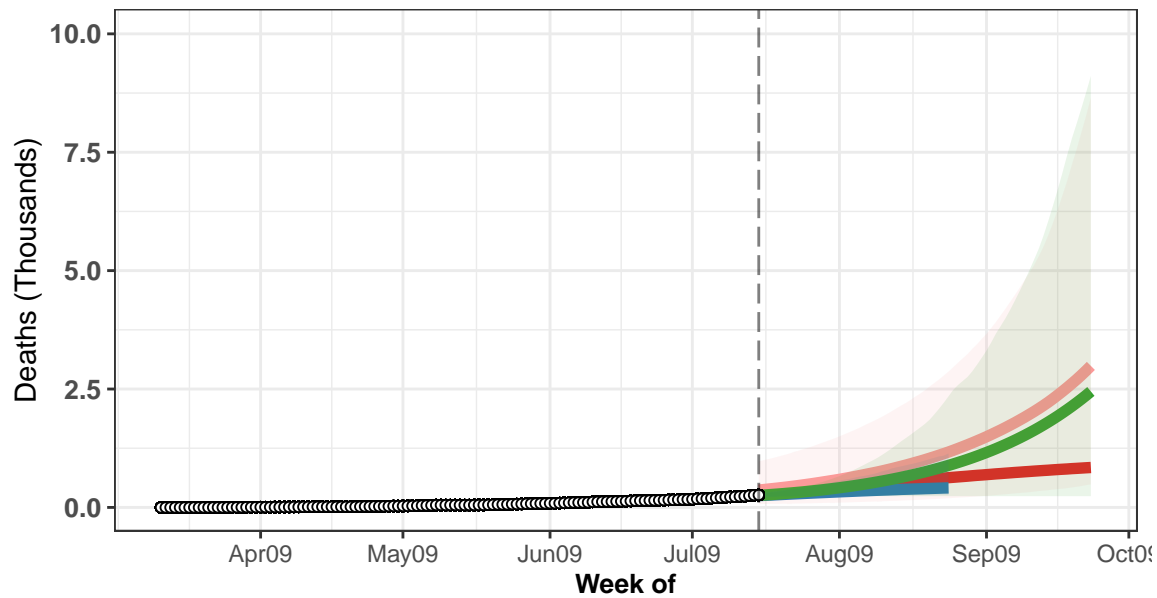

## Cumulative Out-Of-Sample Error (Post Intercept Shift)

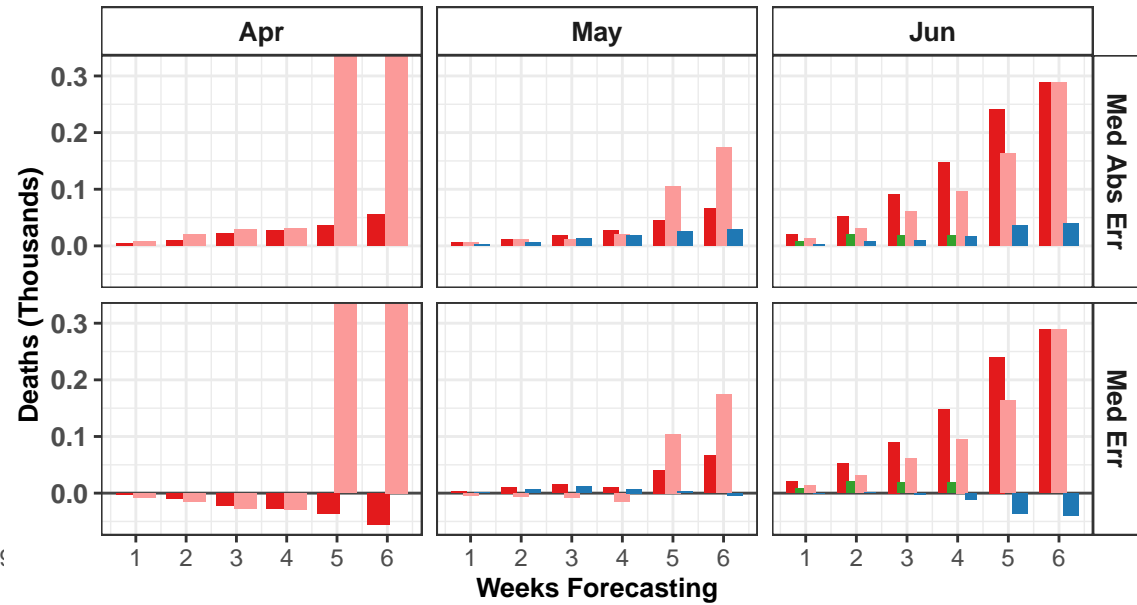

## All Model Versions

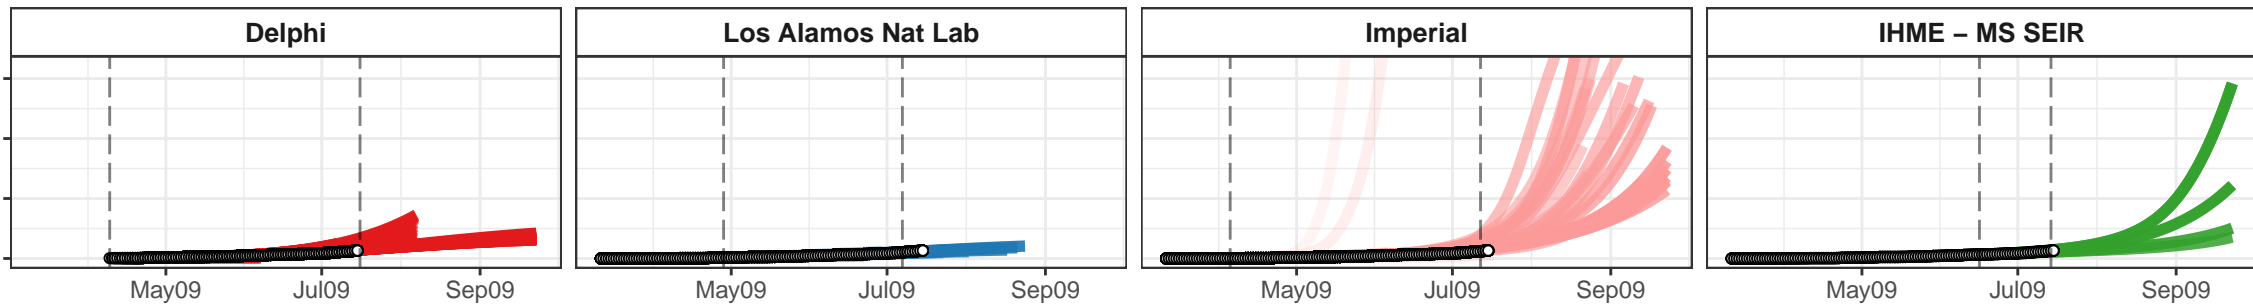

## All Cumulative Errors

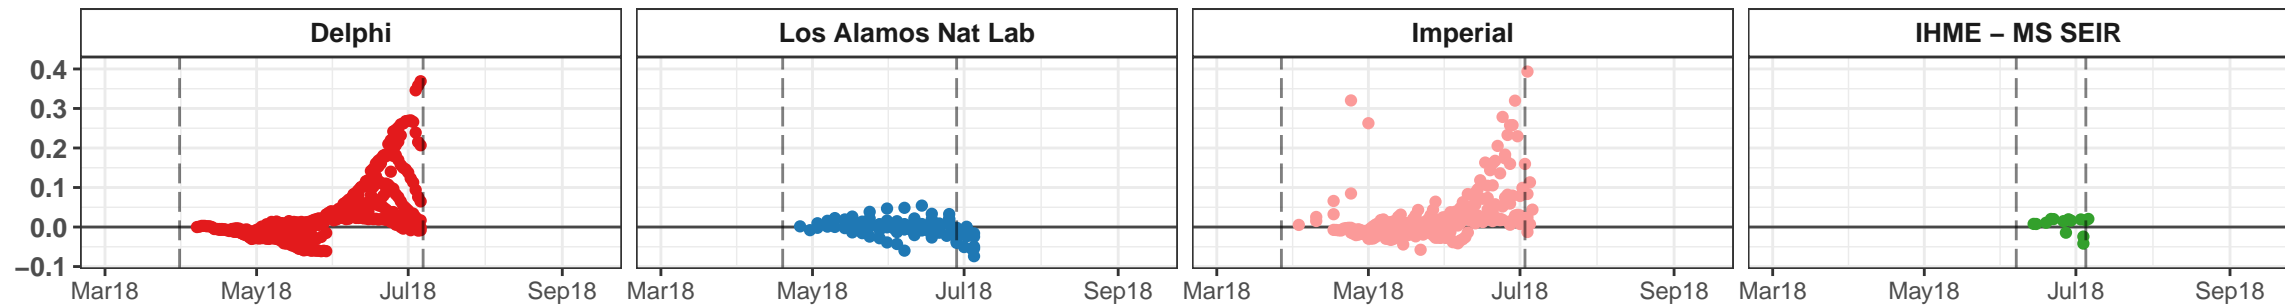

# Norway

## Current Forecast

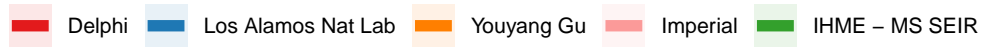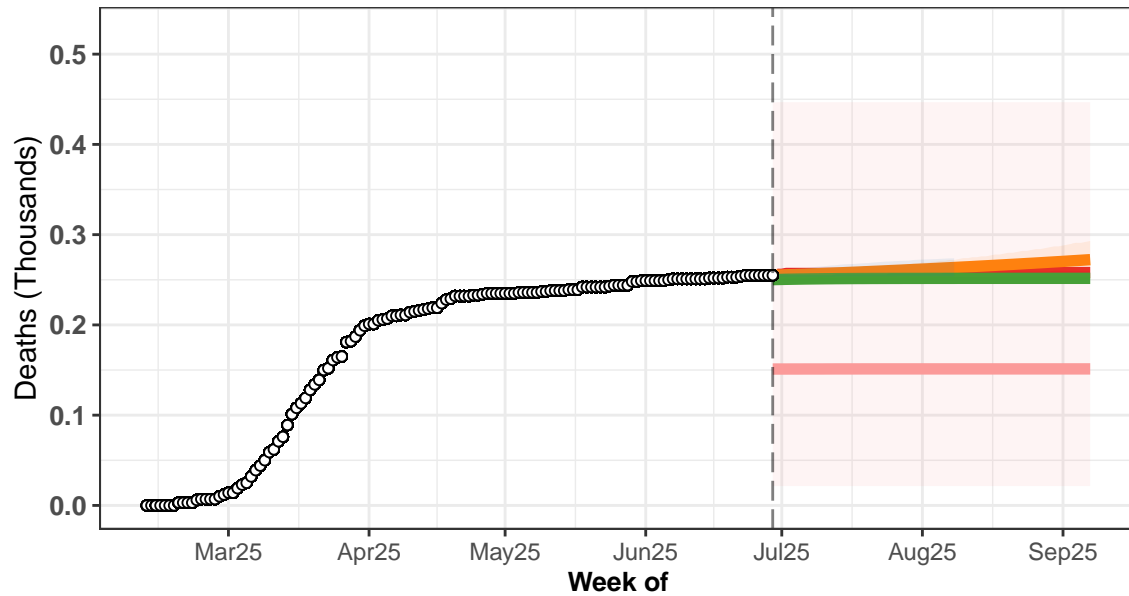

## Cumulative Out-Of-Sample Error (Post Intercept Shift)

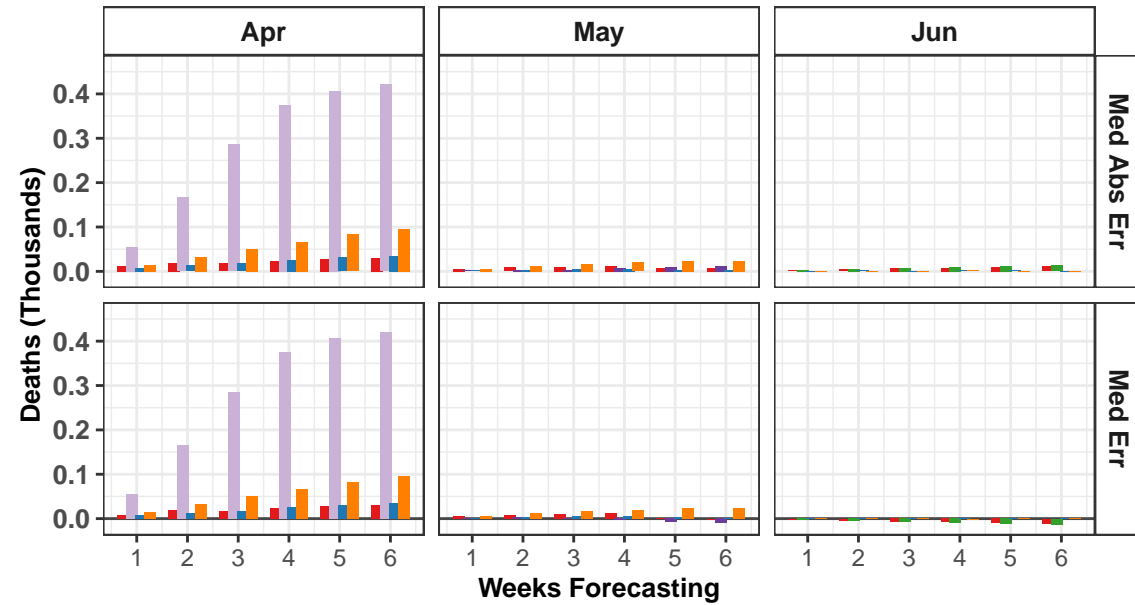

## All Model Versions

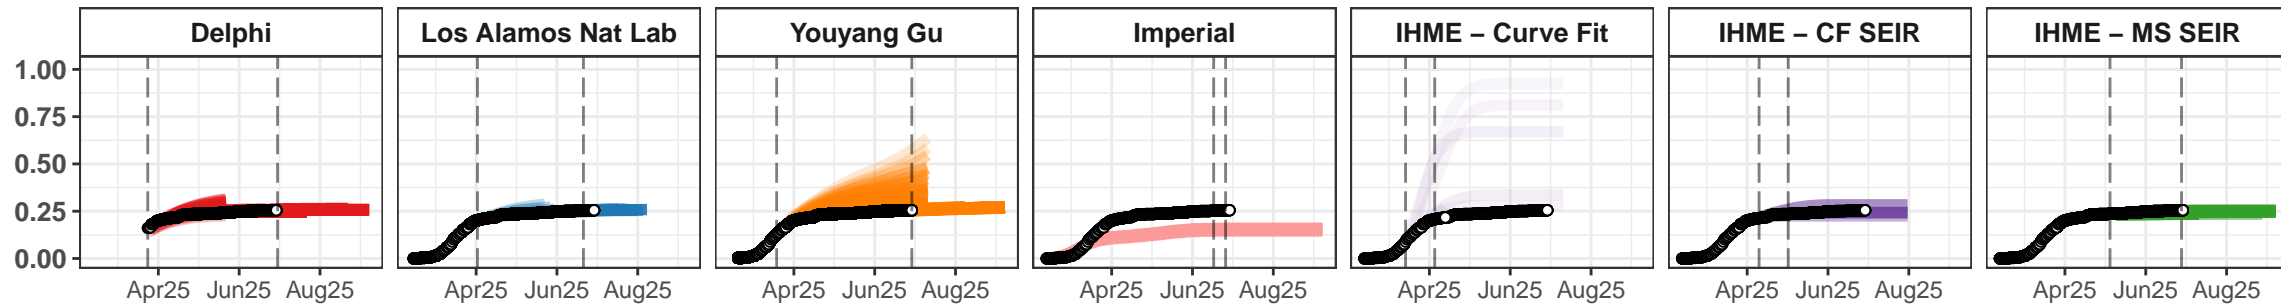

## All Cumulative Errors

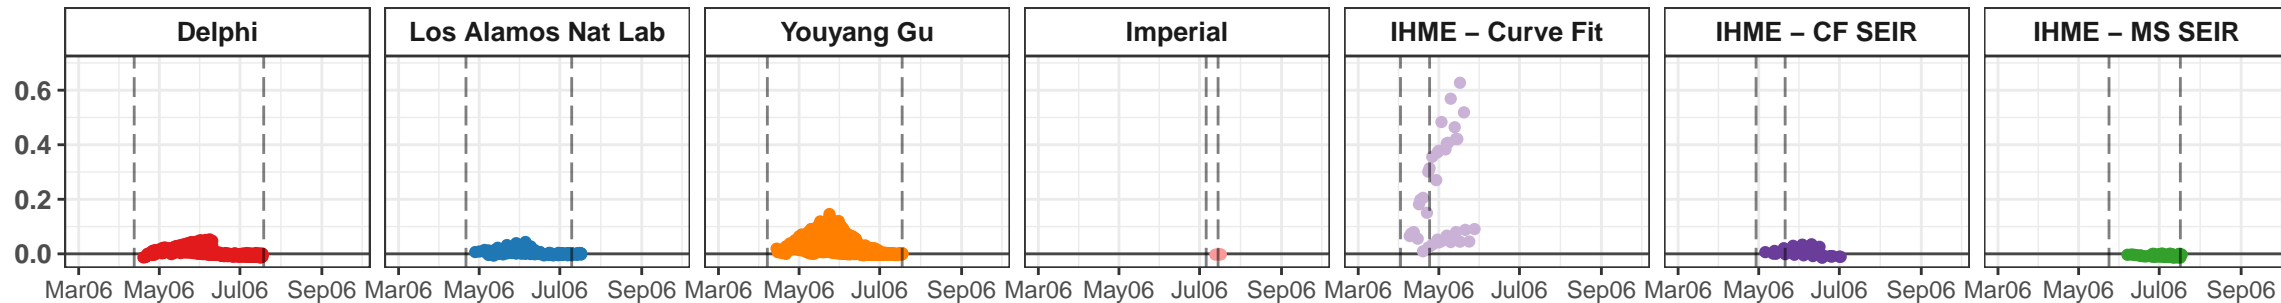

# Democratic Republic of the Congo

## Current Forecast

Delphi Los Alamos Nat Lab Imperial IHME - MS SEIR

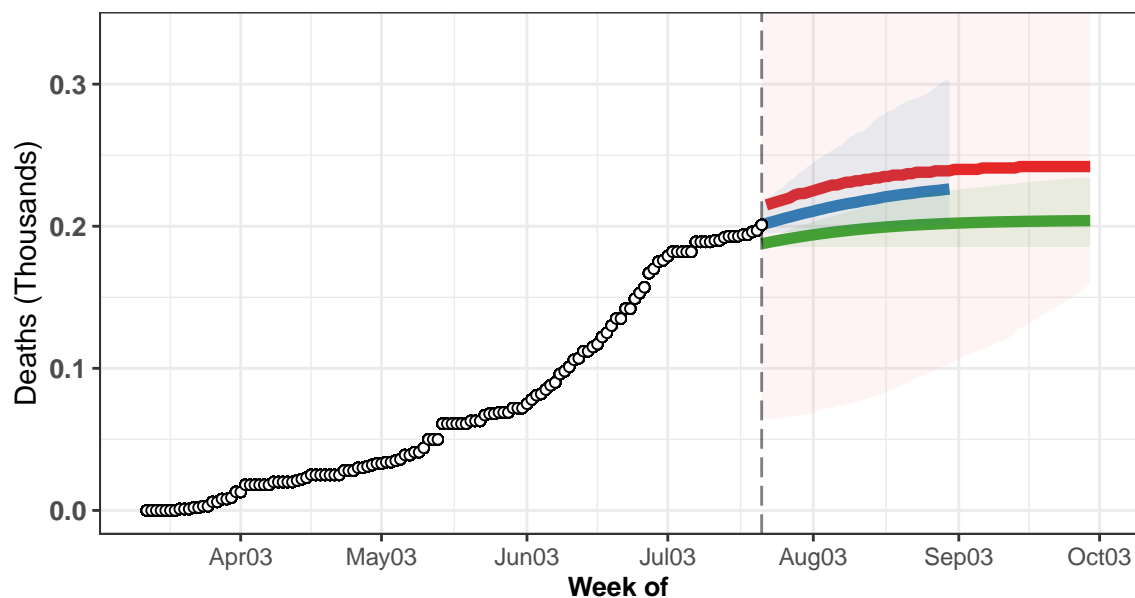

## Cumulative Out-Of-Sample Error (Post Intercept Shift)

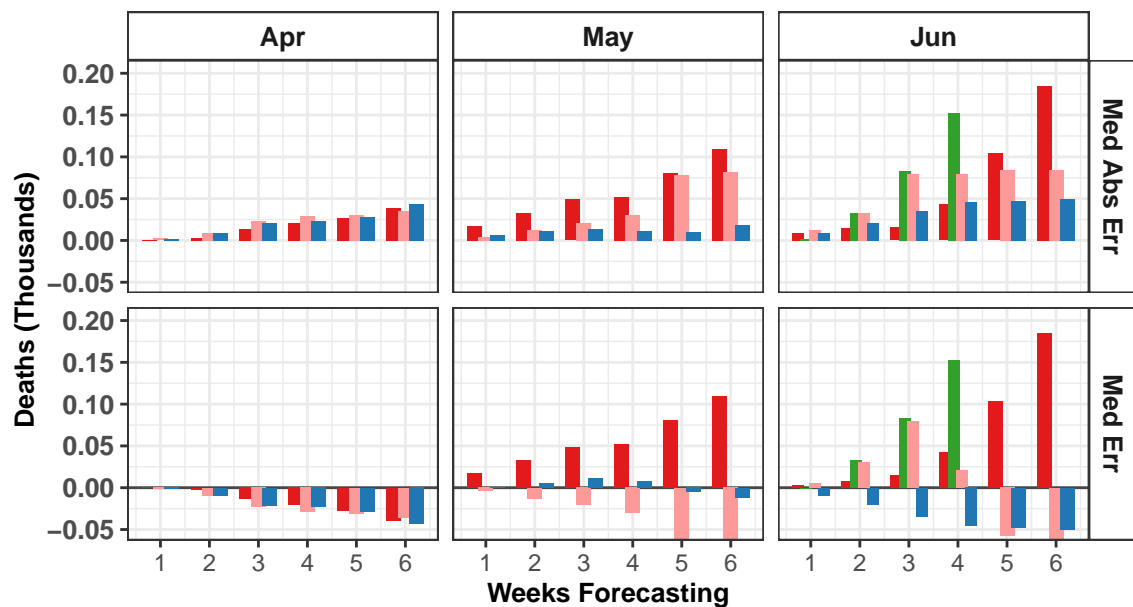

## All Model Versions

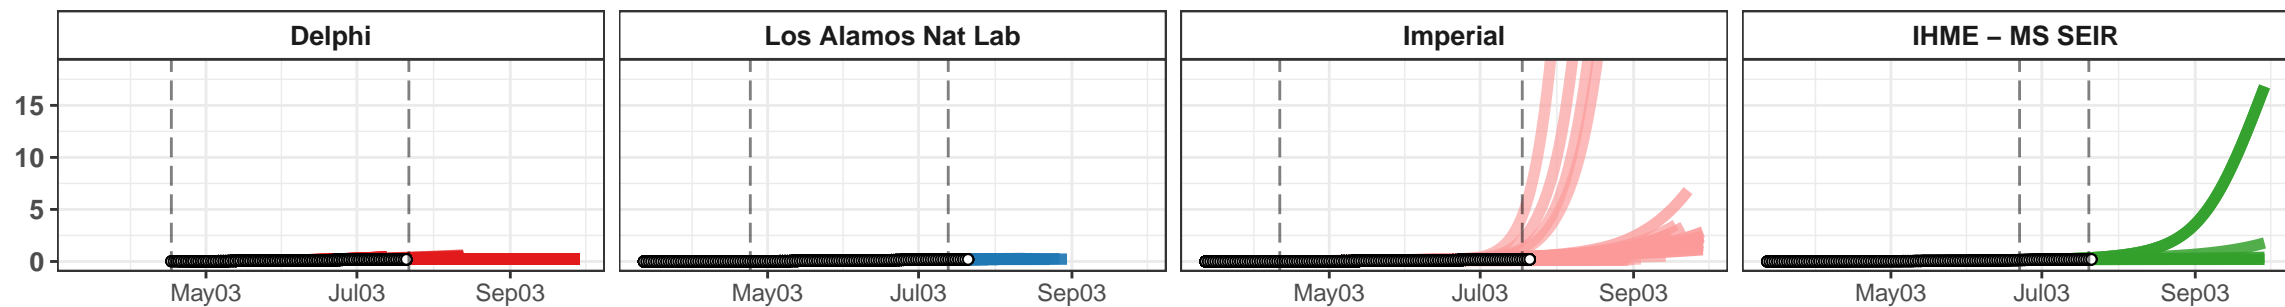

## All Cumulative Errors

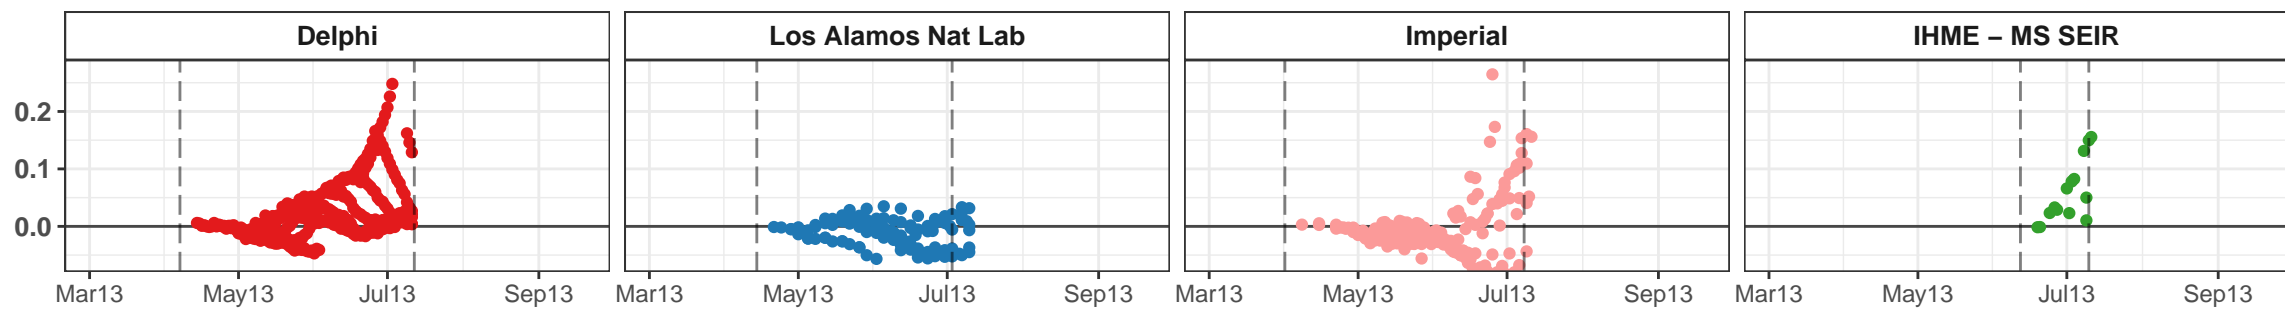

# Greece

## Current Forecast

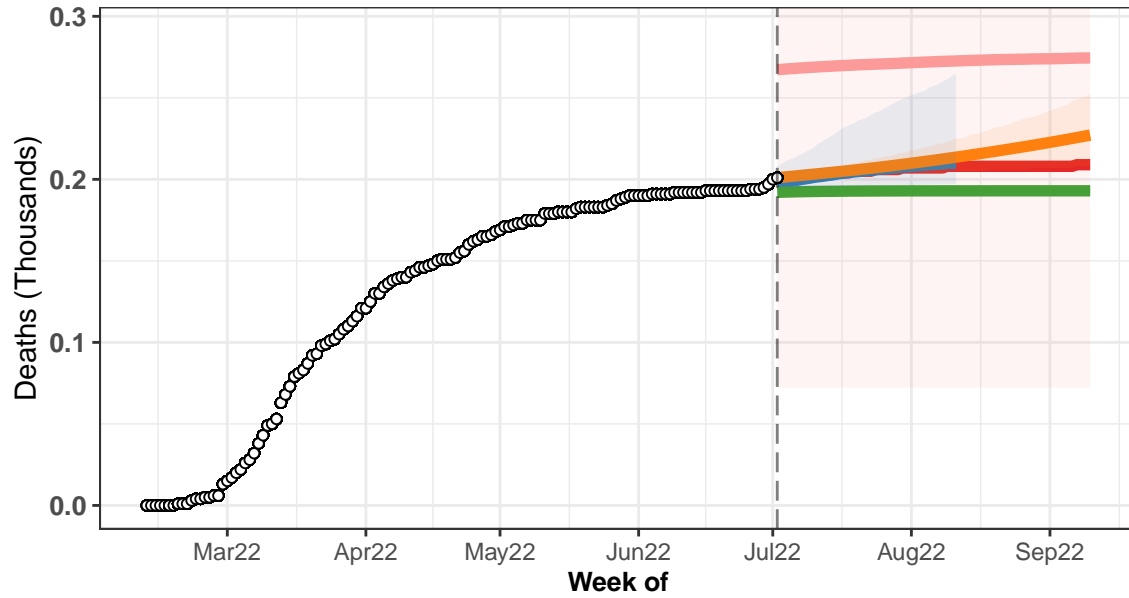

## Cumulative Out-Of-Sample Error (Post Intercept Shift)

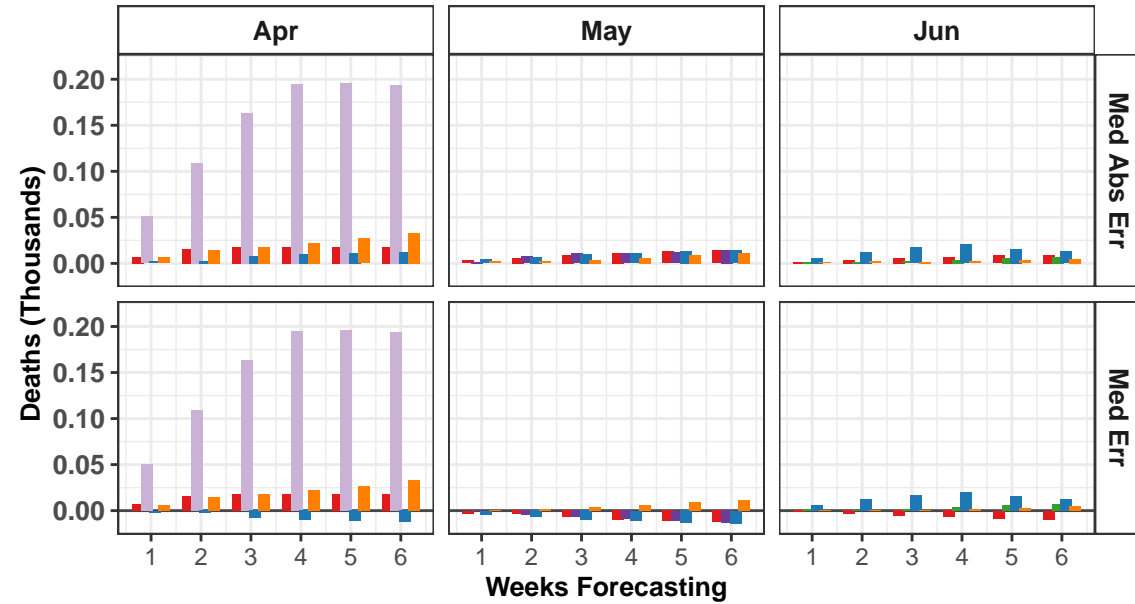

## All Model Versions

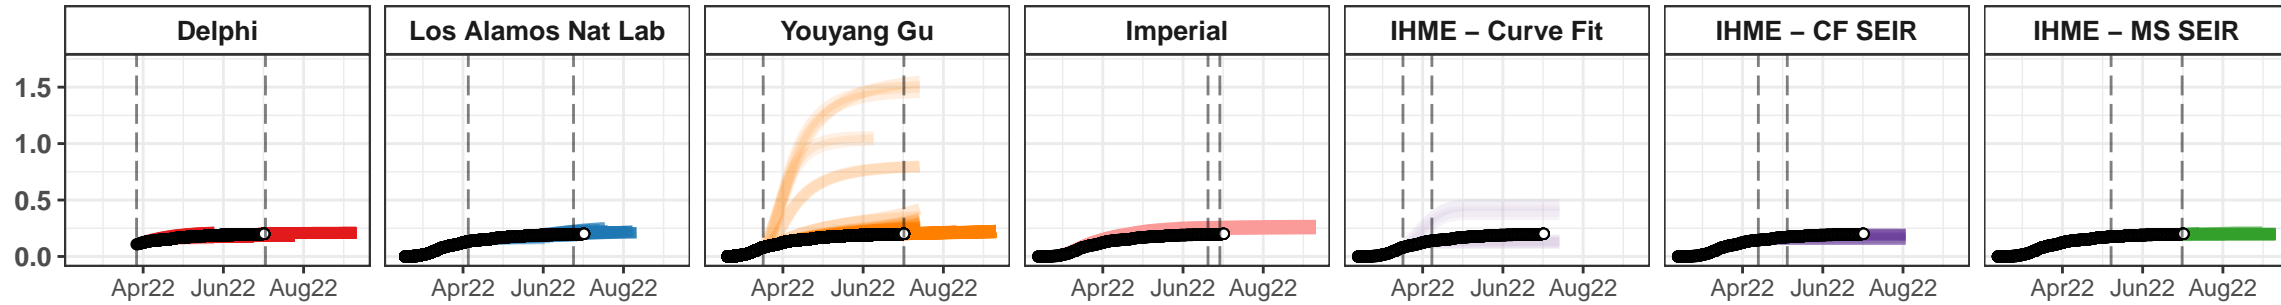

## All Cumulative Errors

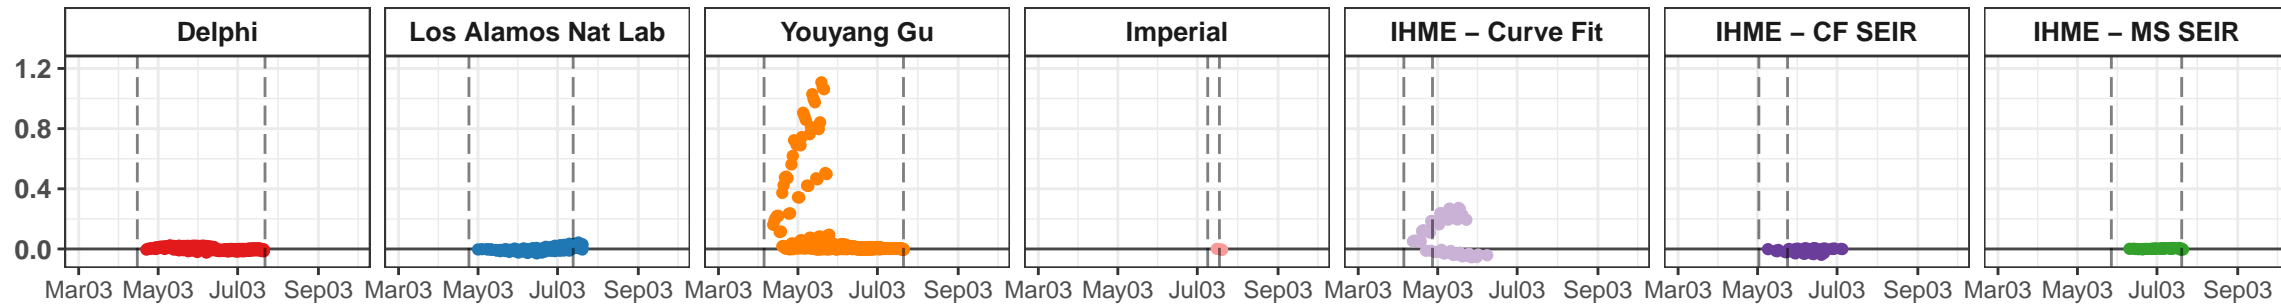

# Ethiopia

## Current Forecast

Delphi Los Alamos Nat Lab Imperial IHME – MS SEIR

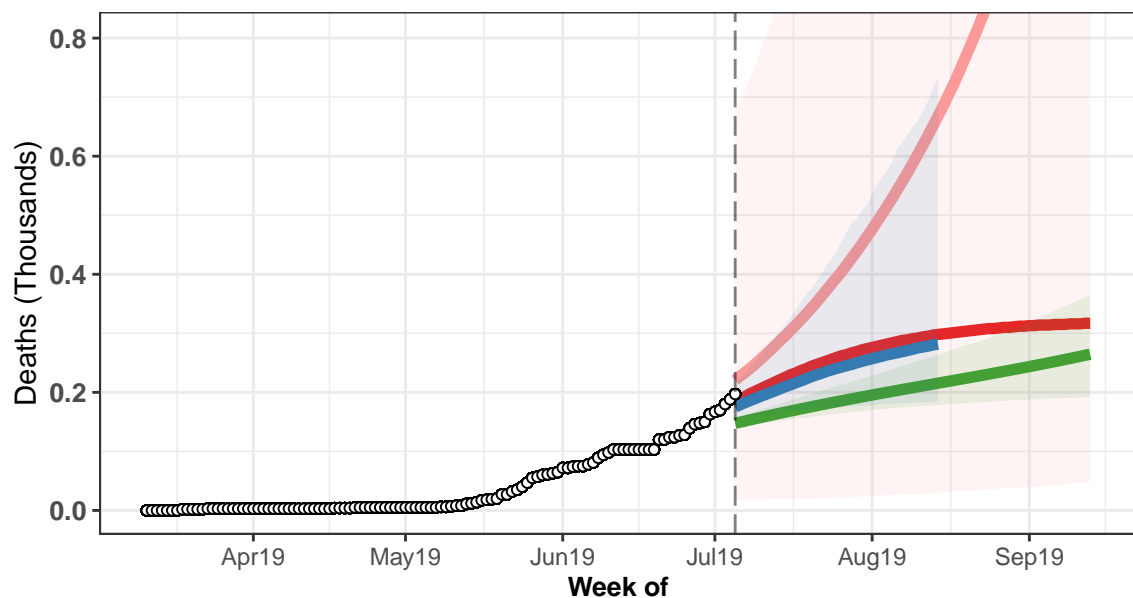

## Cumulative Out-Of-Sample Error (Post Intercept Shift)

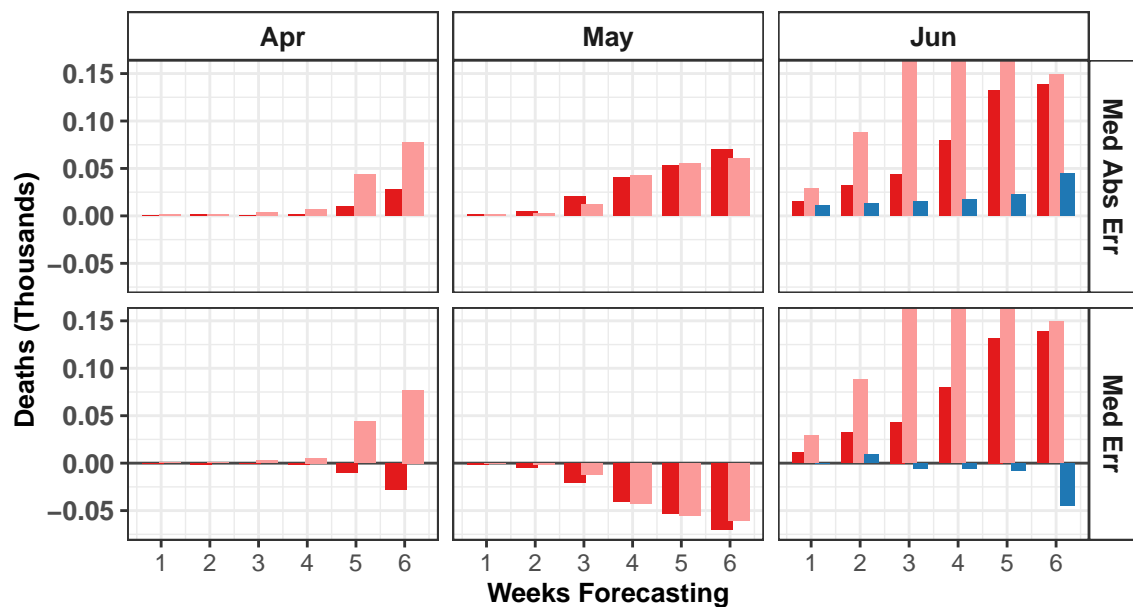

## All Model Versions

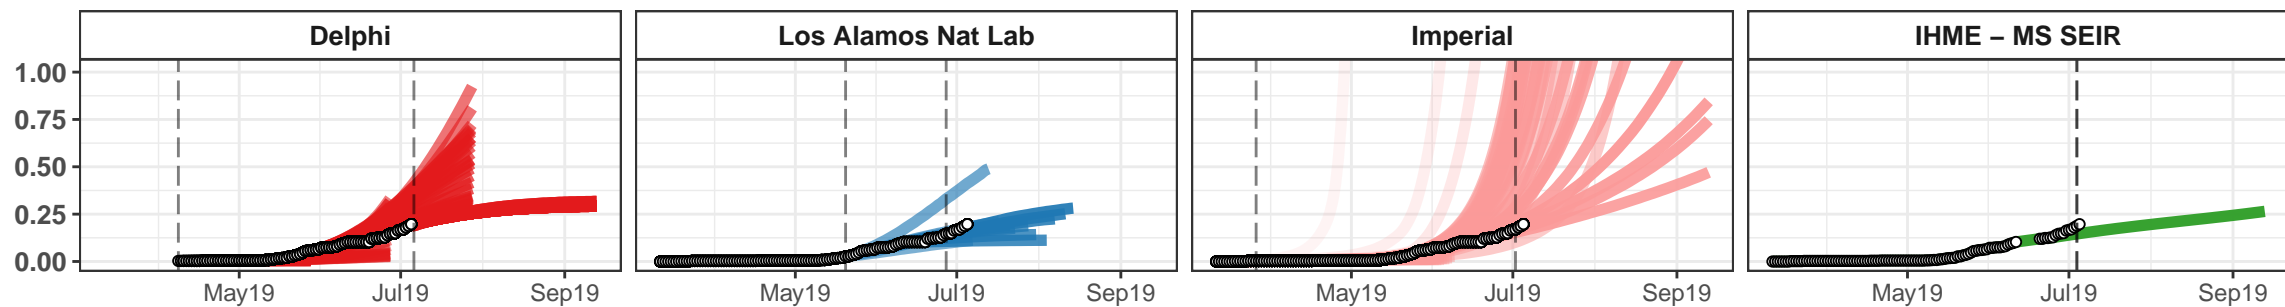

## All Cumulative Errors

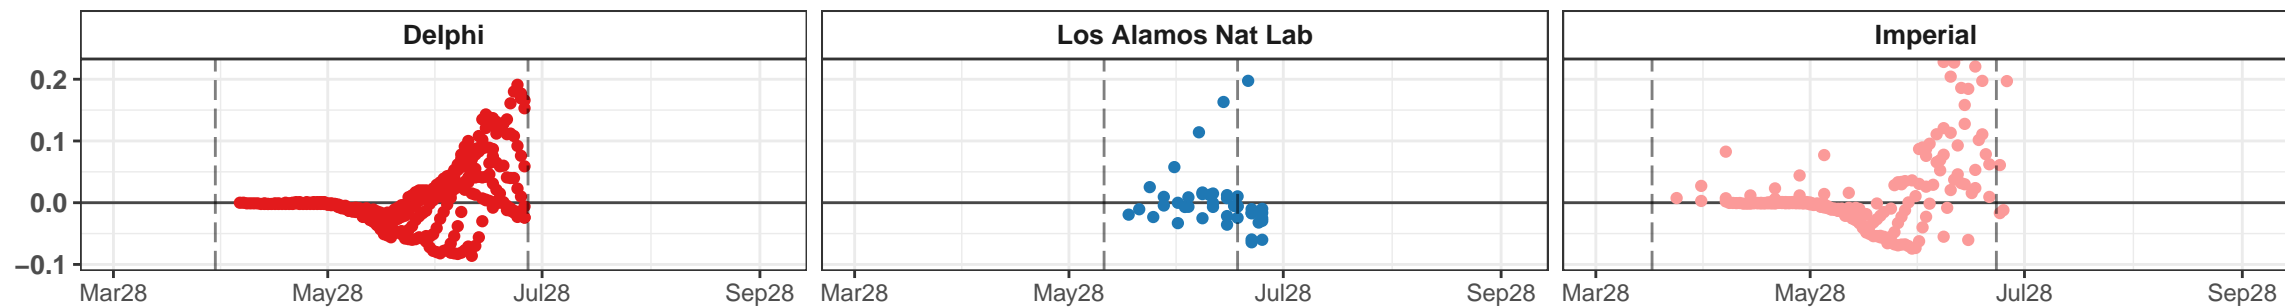

# Puerto Rico

## Current Forecast

Los Alamos Nat Lab    Youyang Gu    IHME – MS SEIR

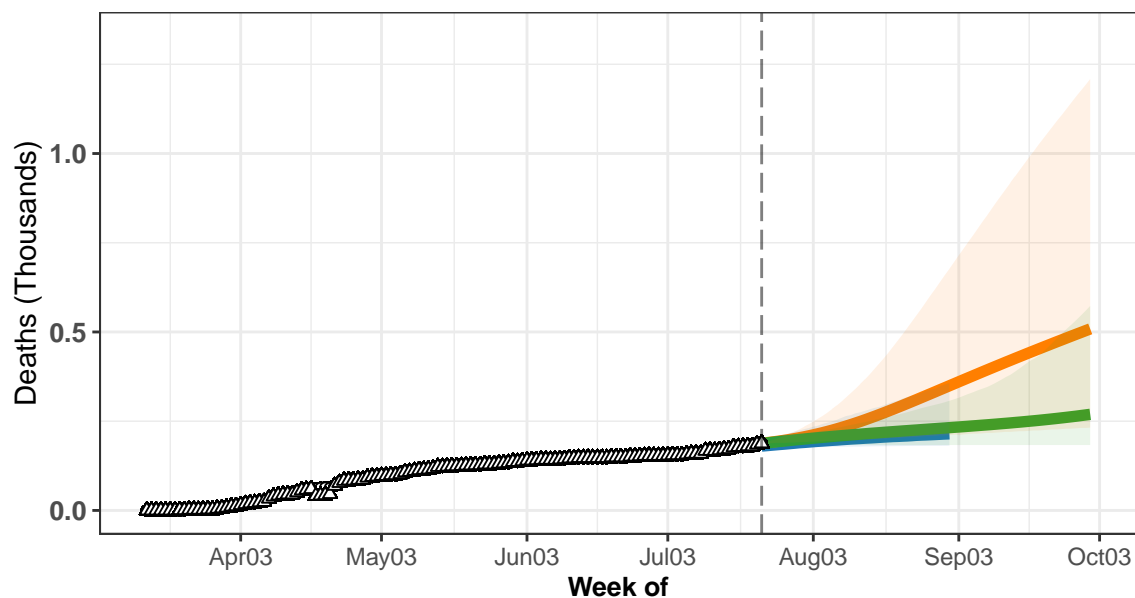

## Cumulative Out-Of-Sample Error (Post Intercept Shift)

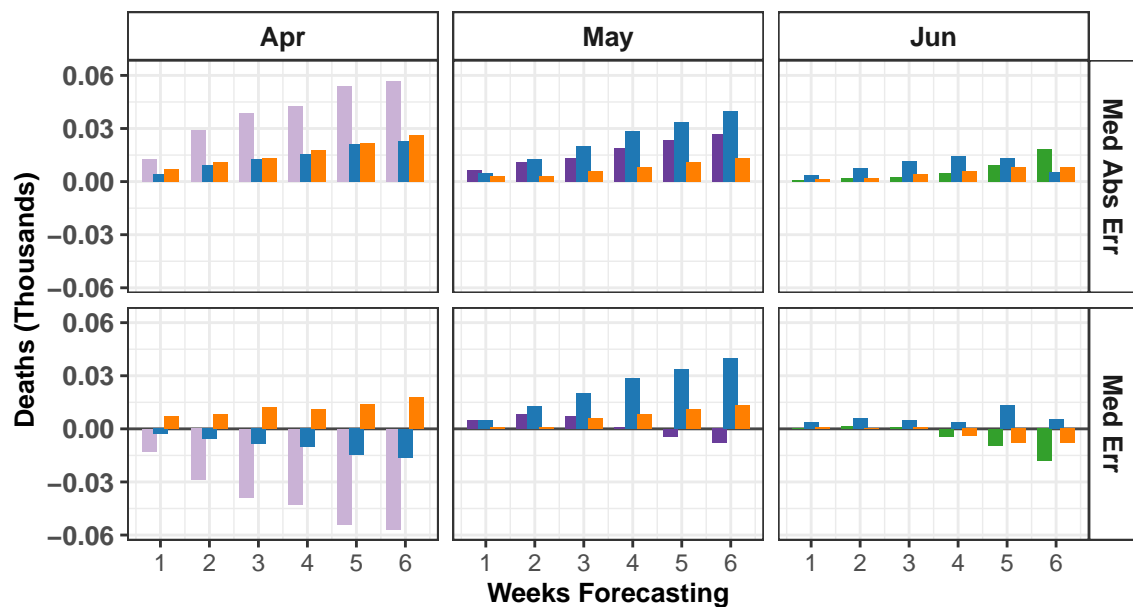

## All Model Versions

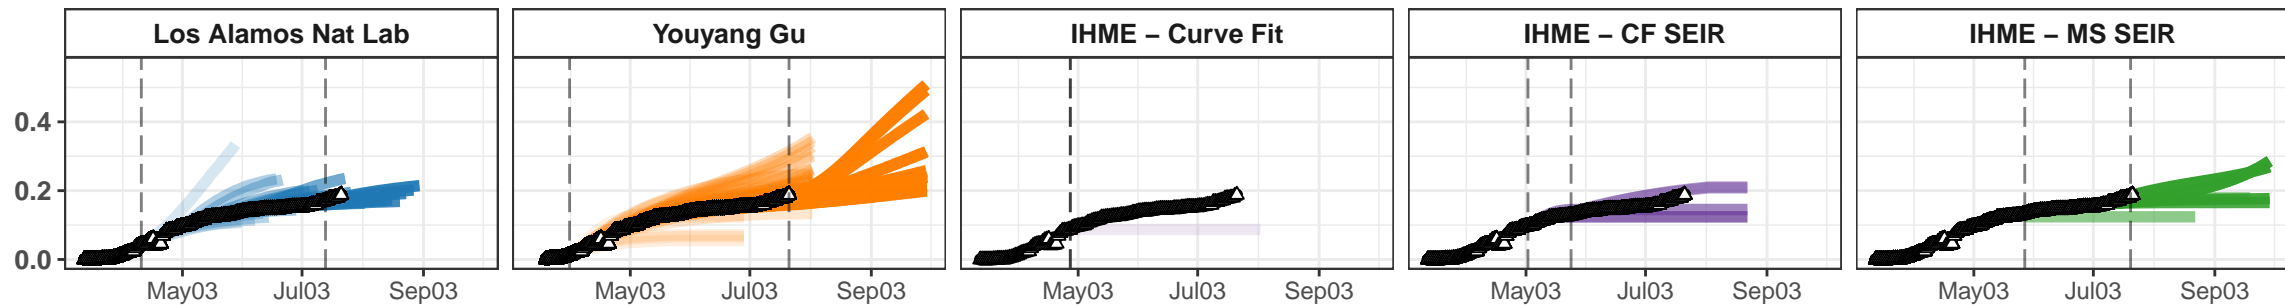

## All Cumulative Errors

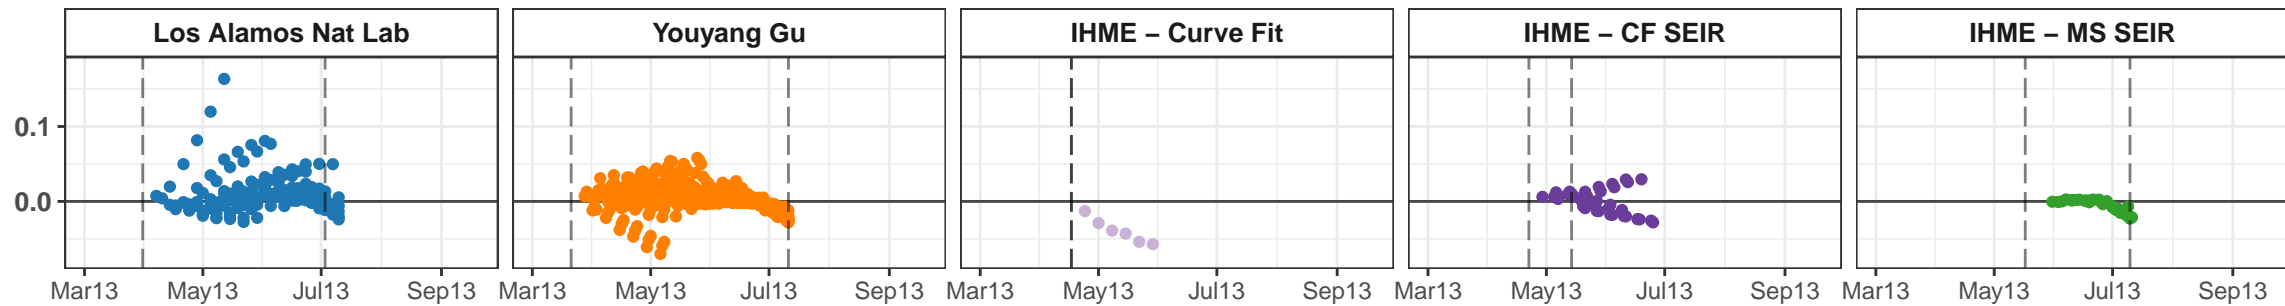

# Senegal

## Current Forecast

Delphi Los Alamos Nat Lab Imperial IHME – MS SEIR

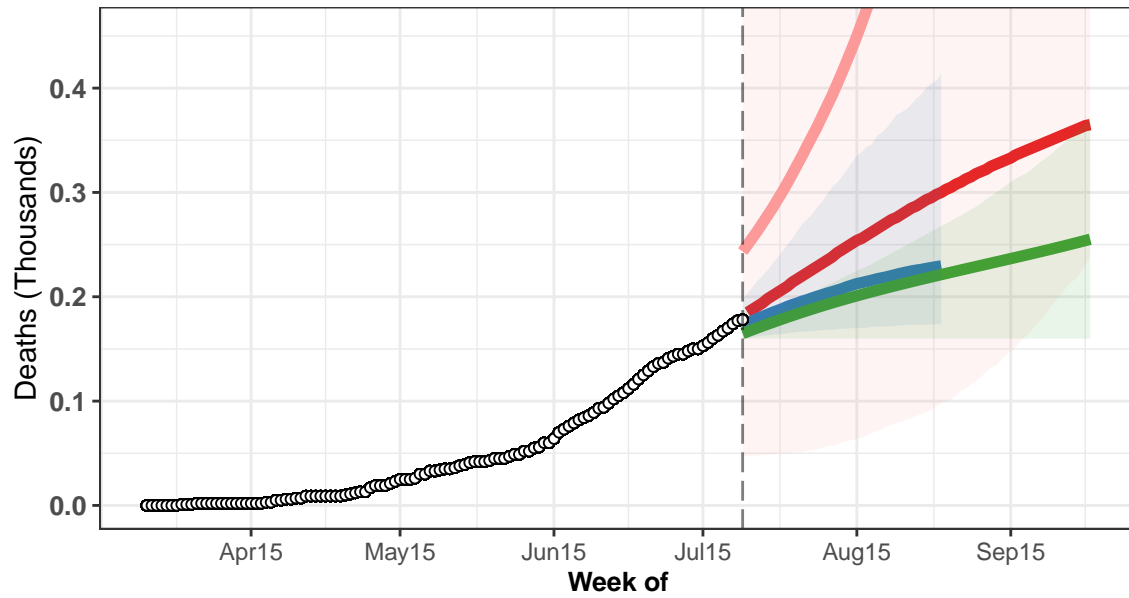

## Cumulative Out-Of-Sample Error (Post Intercept Shift)

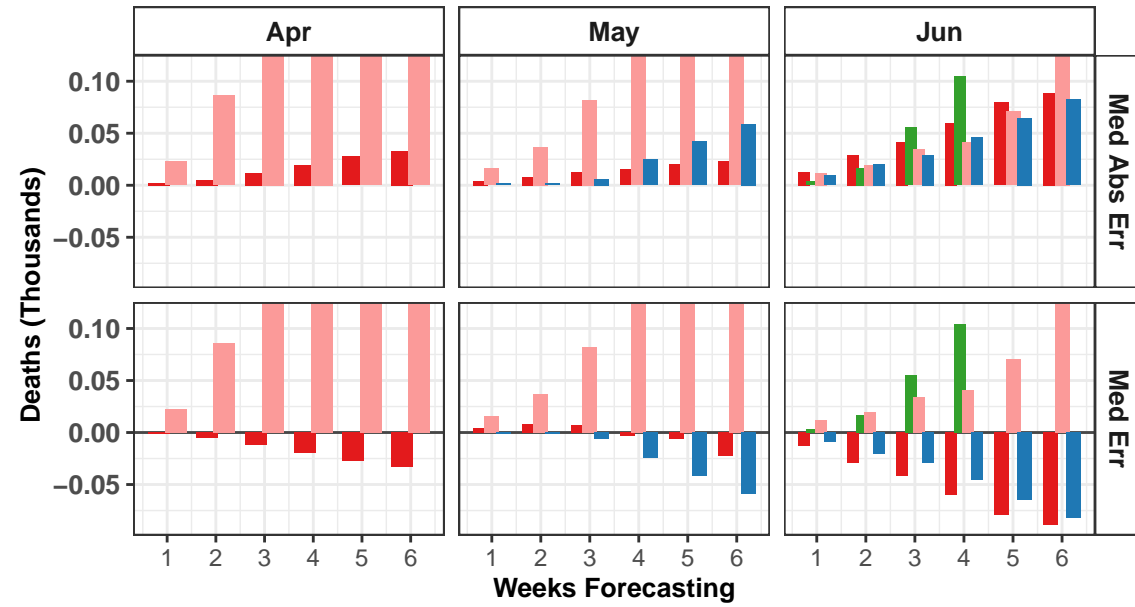

## All Model Versions

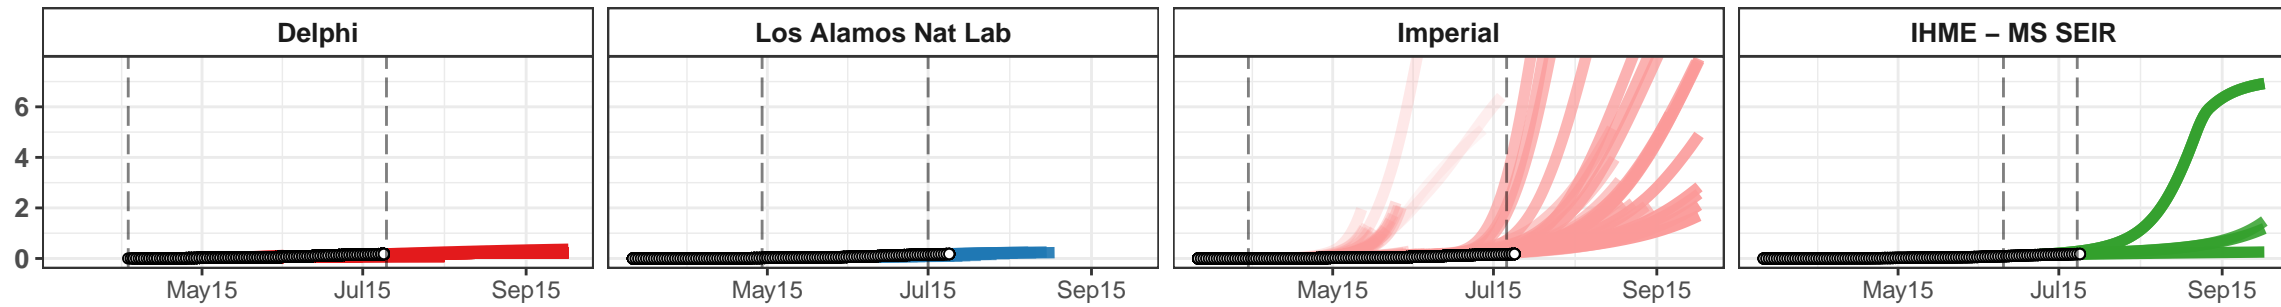

## All Cumulative Errors

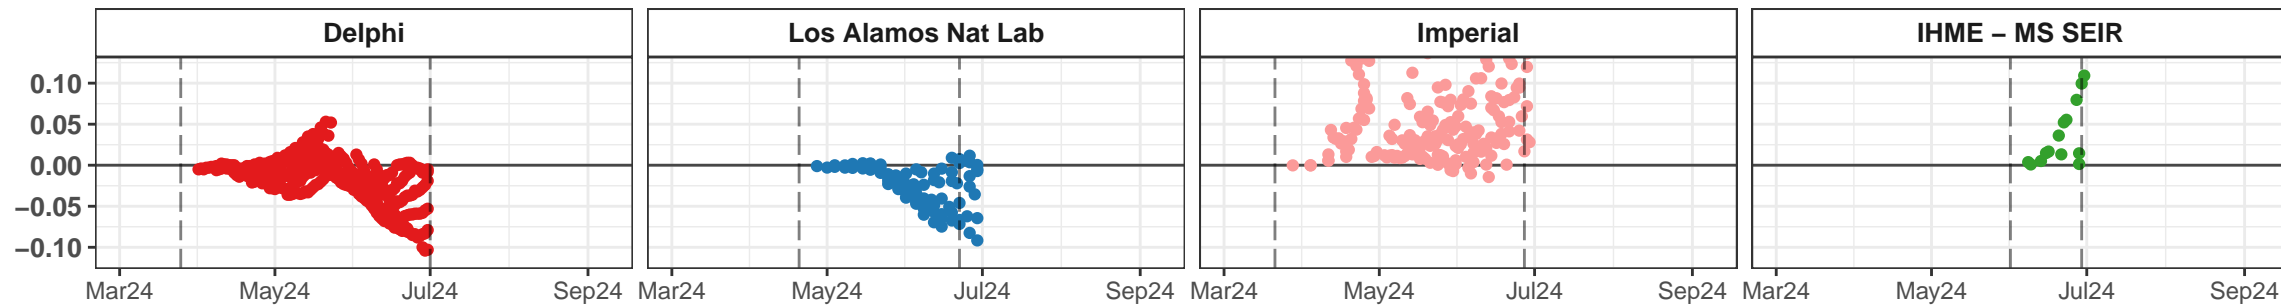



# Qatar

## Current Forecast

Delphi Los Alamos Nat Lab Imperial IHME – MS SEIR

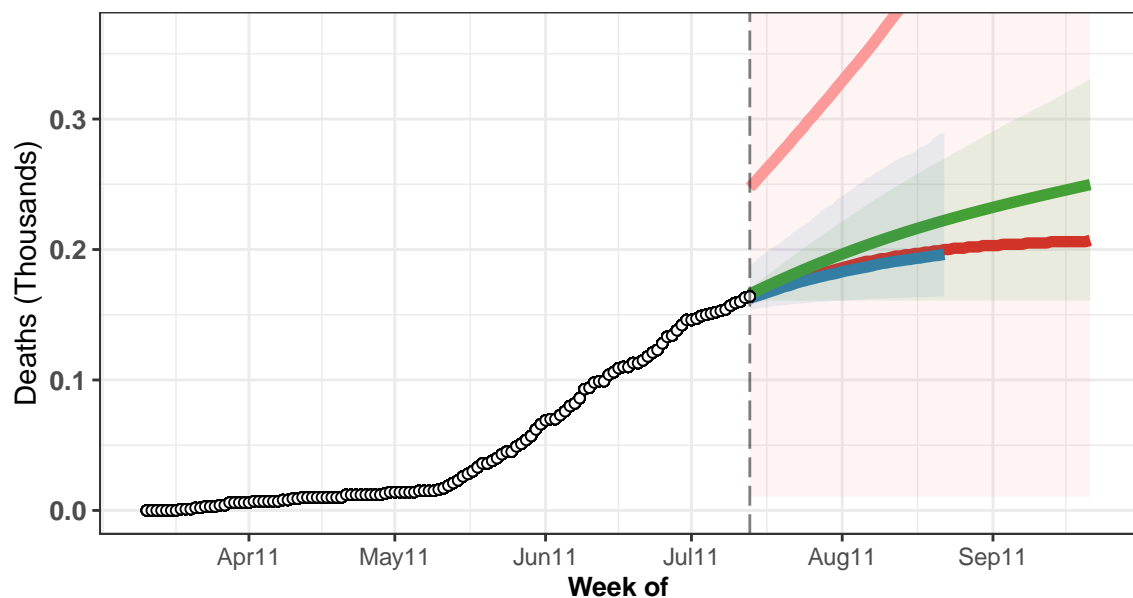

## Cumulative Out-Of-Sample Error (Post Intercept Shift)

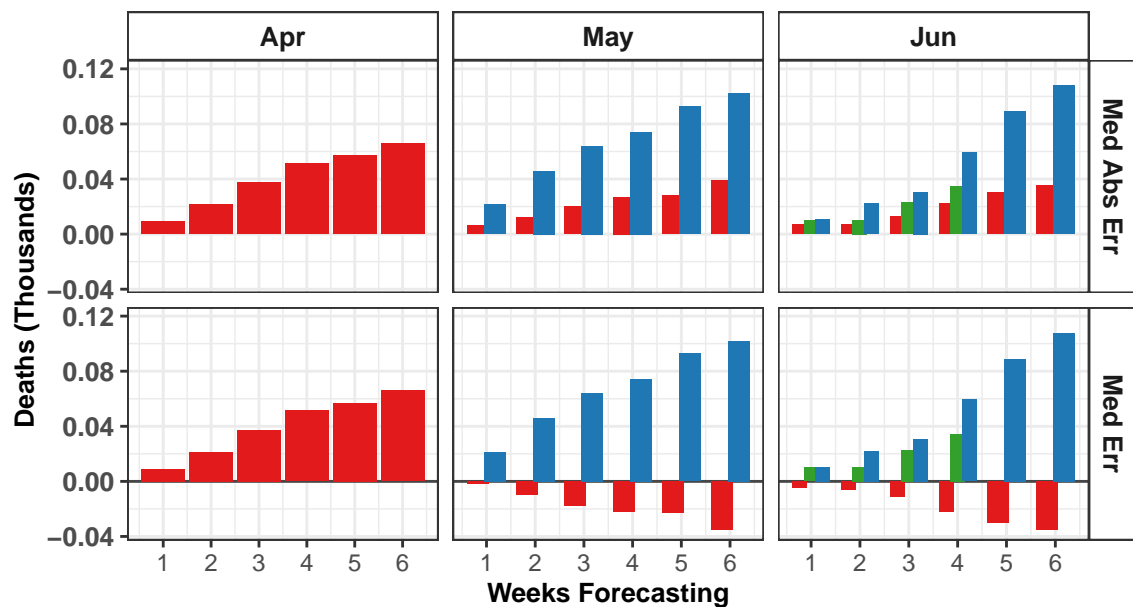

## All Model Versions

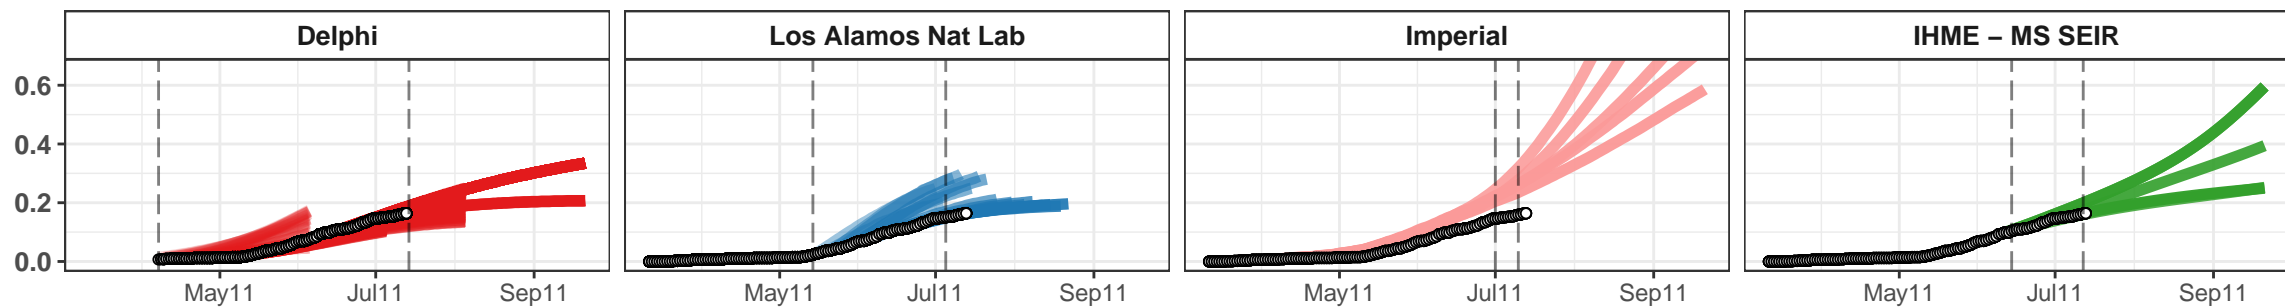

## All Cumulative Errors

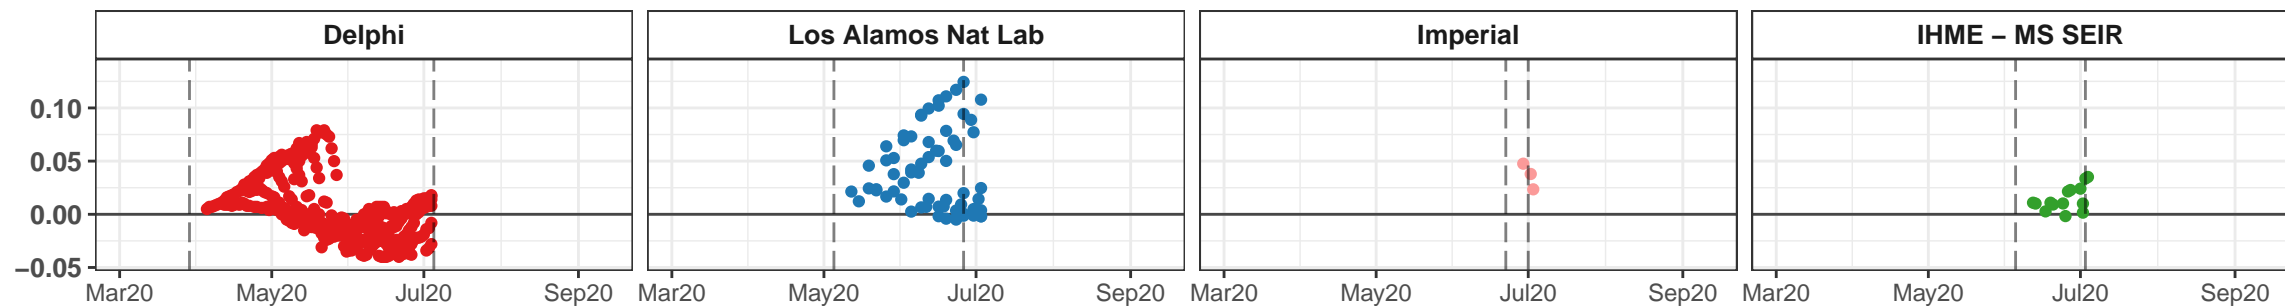

# Mauritania

## Current Forecast

Delphi Los Alamos Nat Lab Imperial IHME – MS SEIR

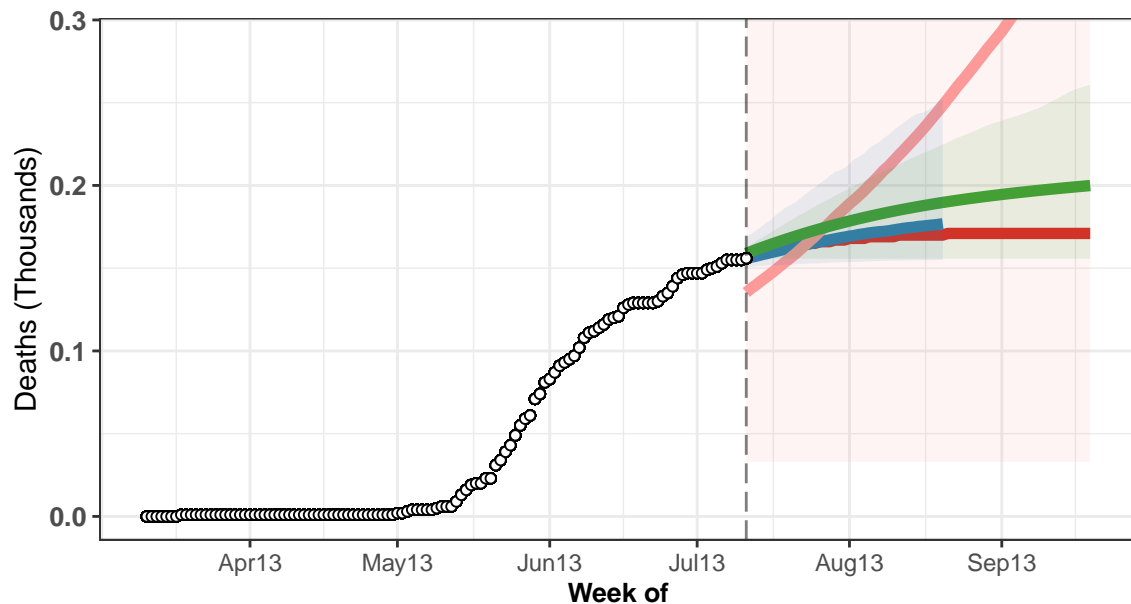

## Cumulative Out-Of-Sample Error (Post Intercept Shift)

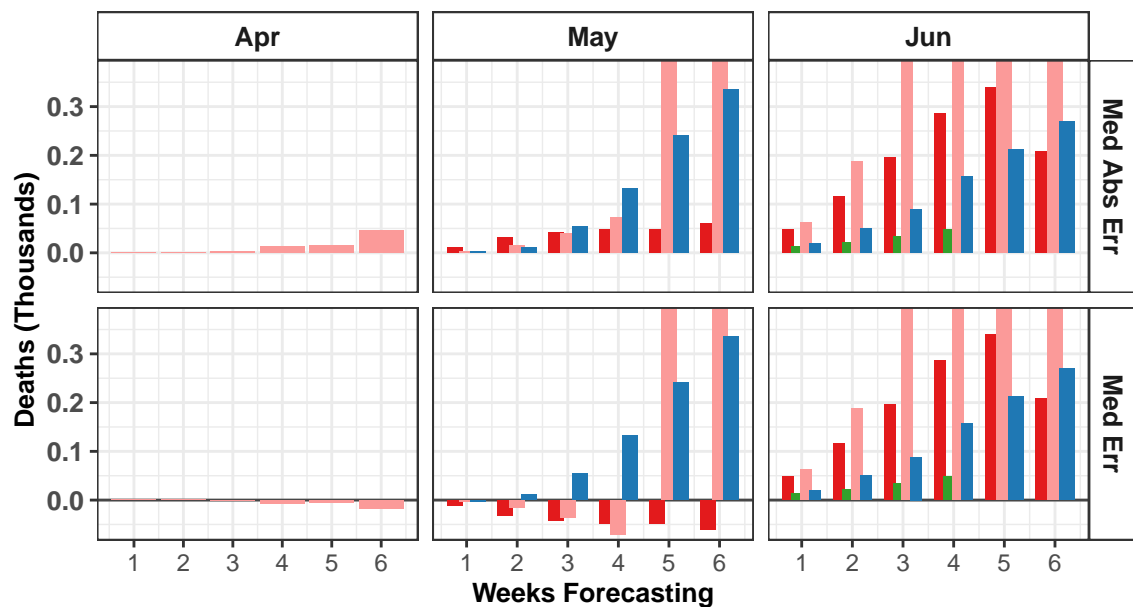

## All Model Versions

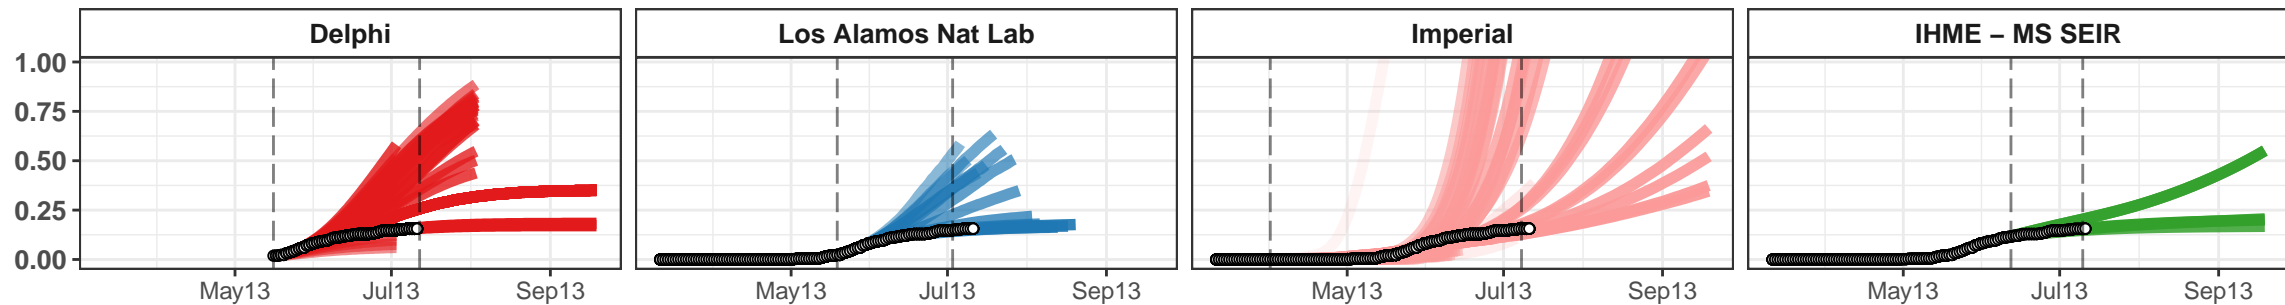

## All Cumulative Errors

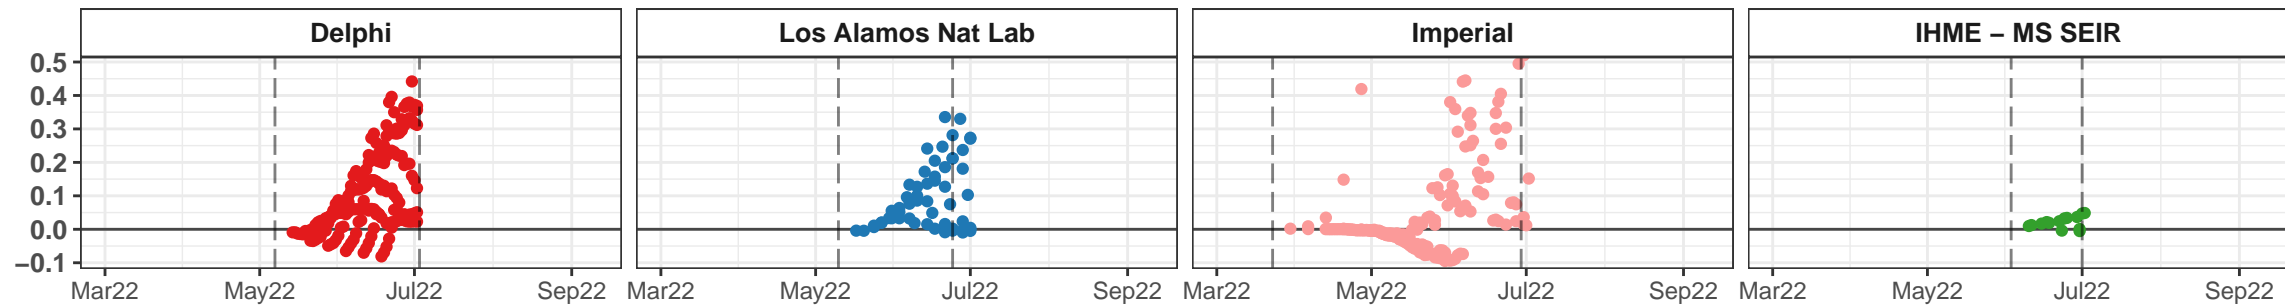

# Haiti

## Current Forecast

Delphi Los Alamos Nat Lab Imperial IHME – MS SEIR

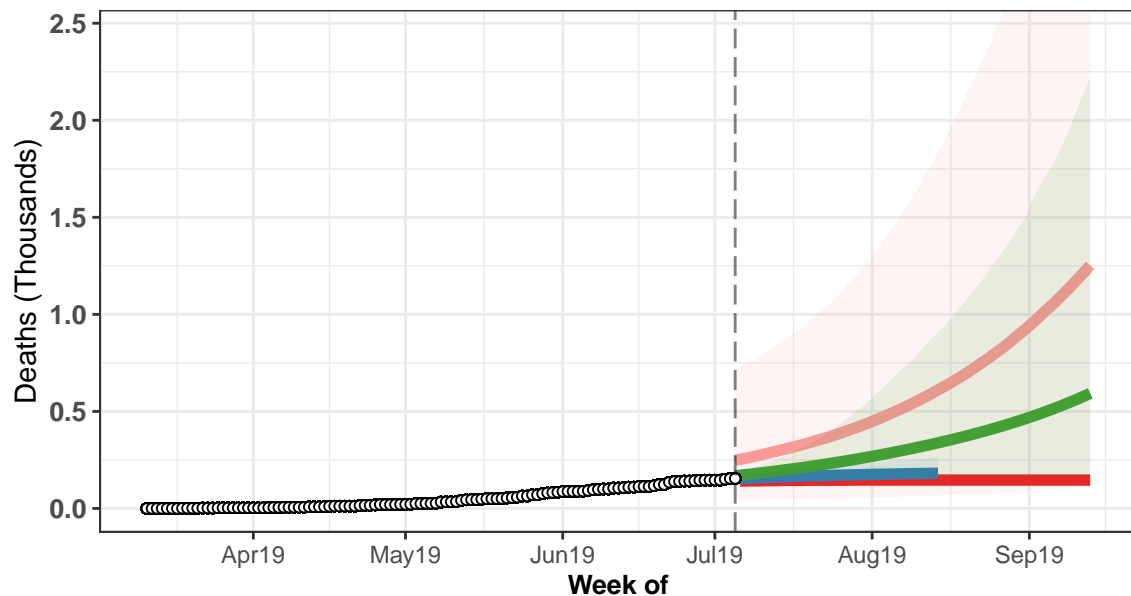

## Cumulative Out-Of-Sample Error (Post Intercept Shift)

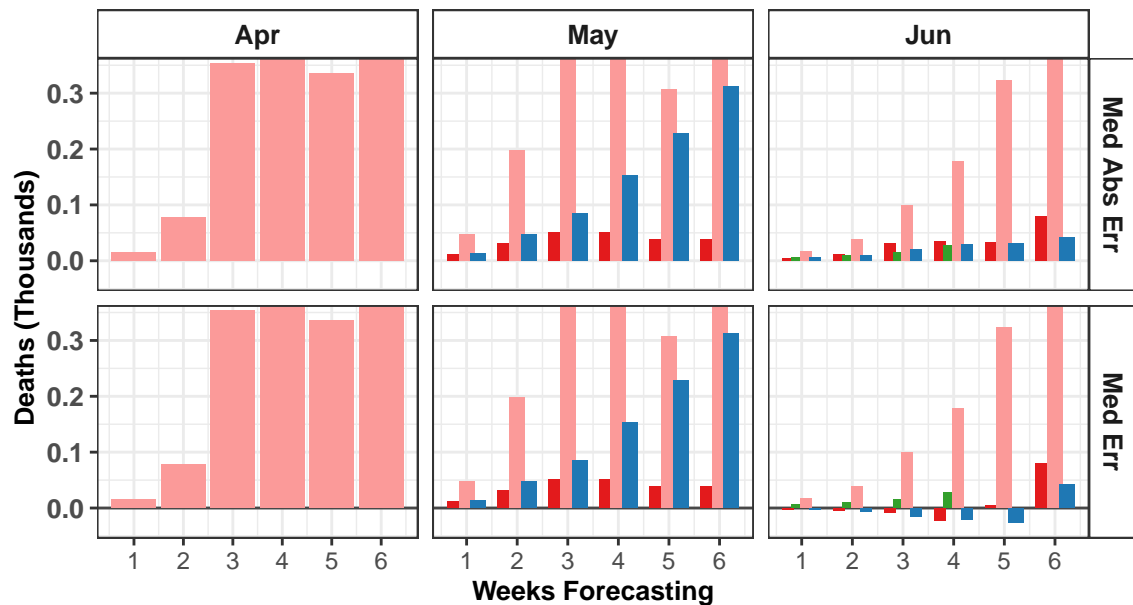

## All Model Versions

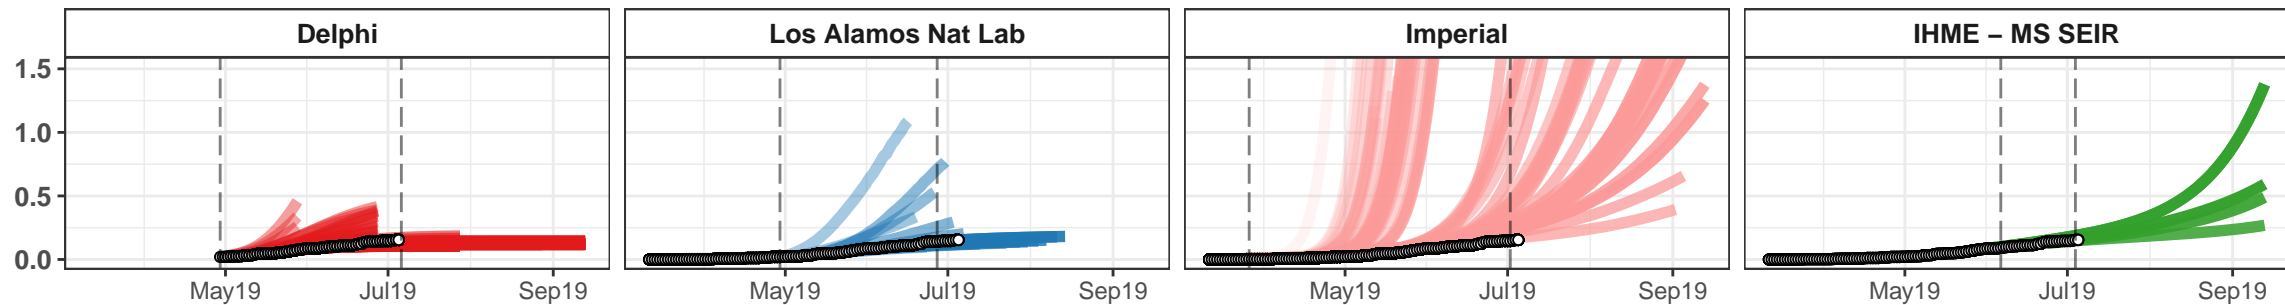

## All Cumulative Errors

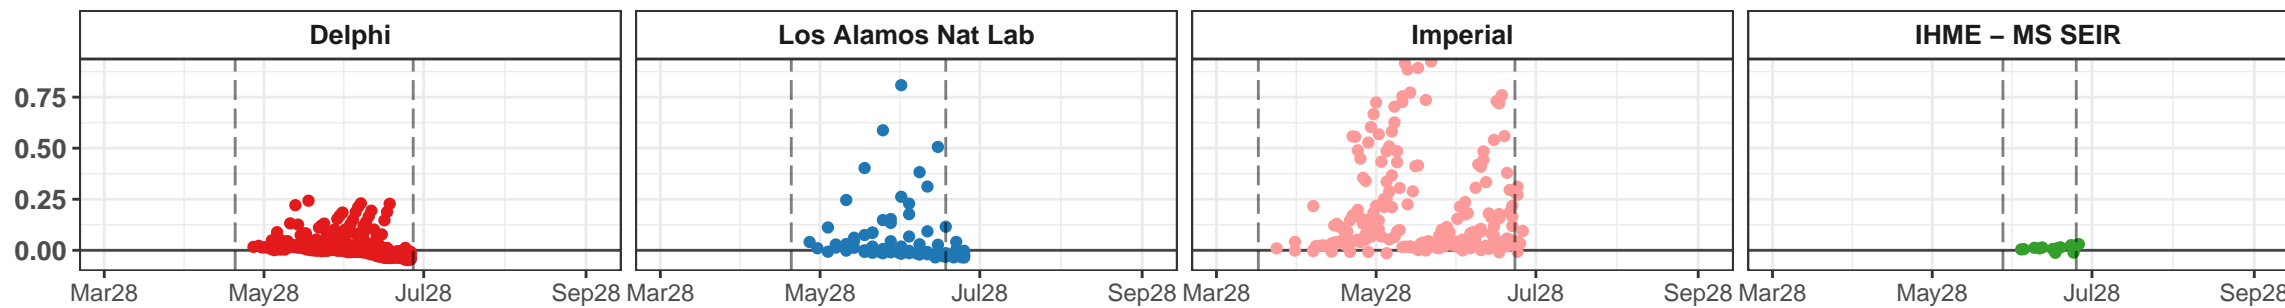

# Ghana

## Current Forecast

Delphi Los Alamos Nat Lab Imperial IHME – MS SEIR

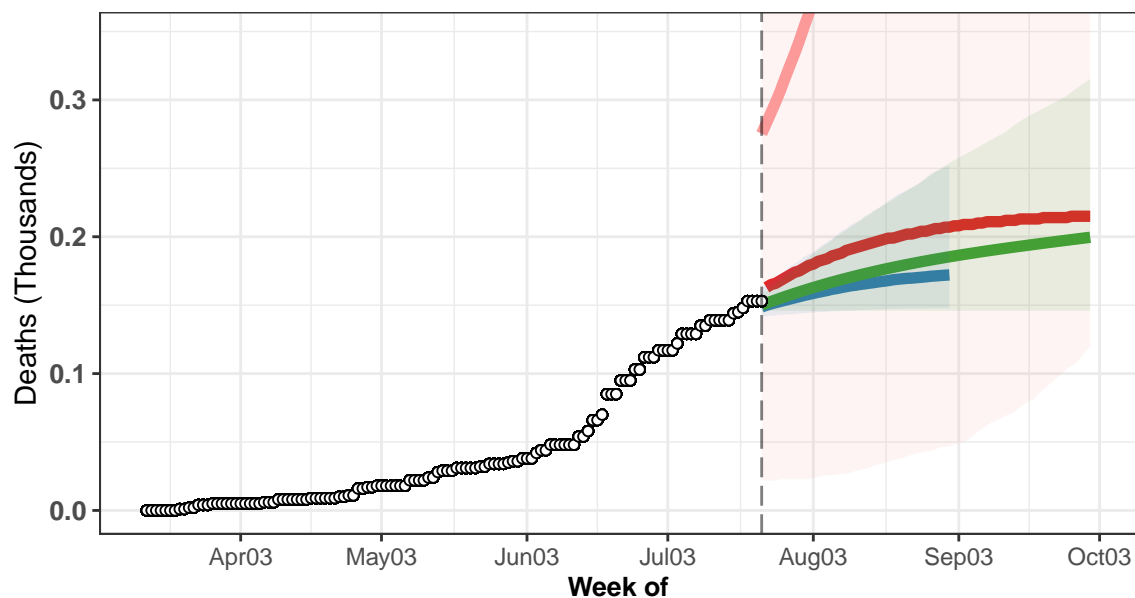

## Cumulative Out-Of-Sample Error (Post Intercept Shift)

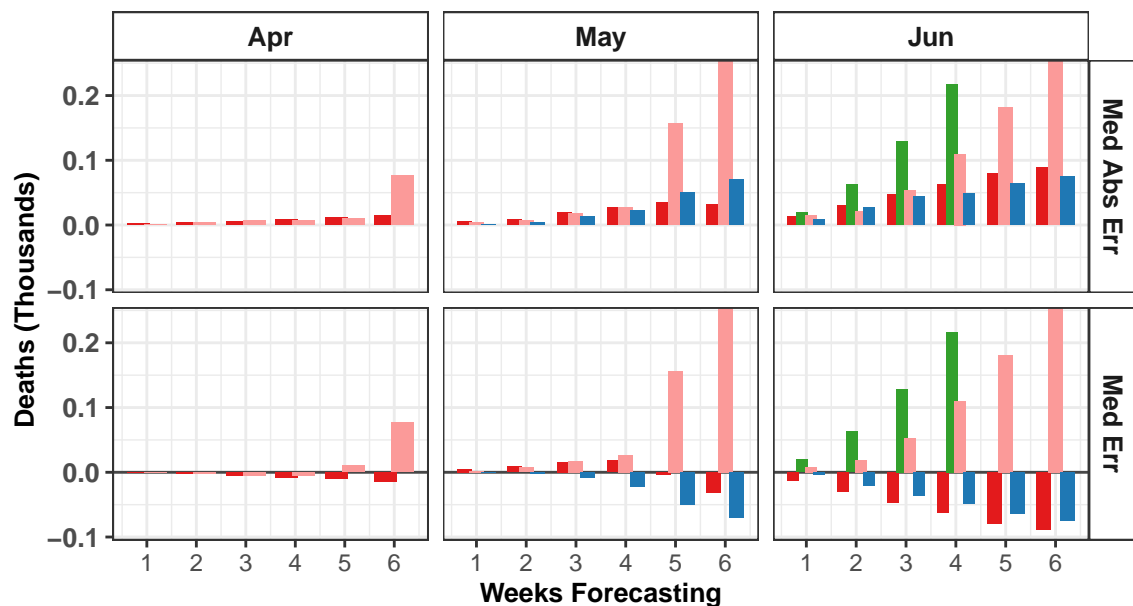

## All Model Versions

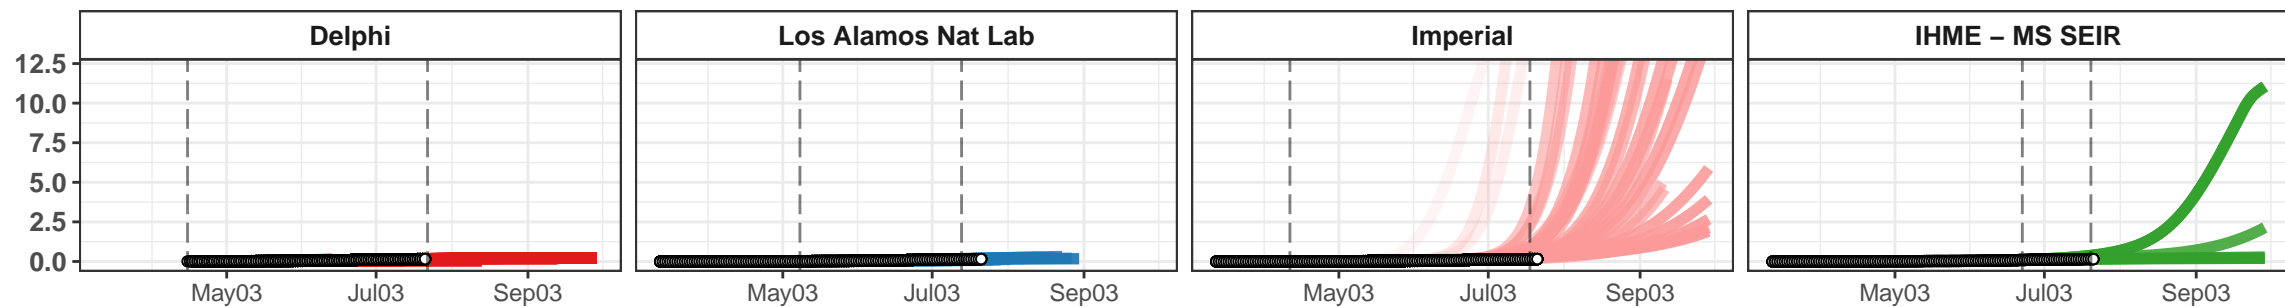

## All Cumulative Errors

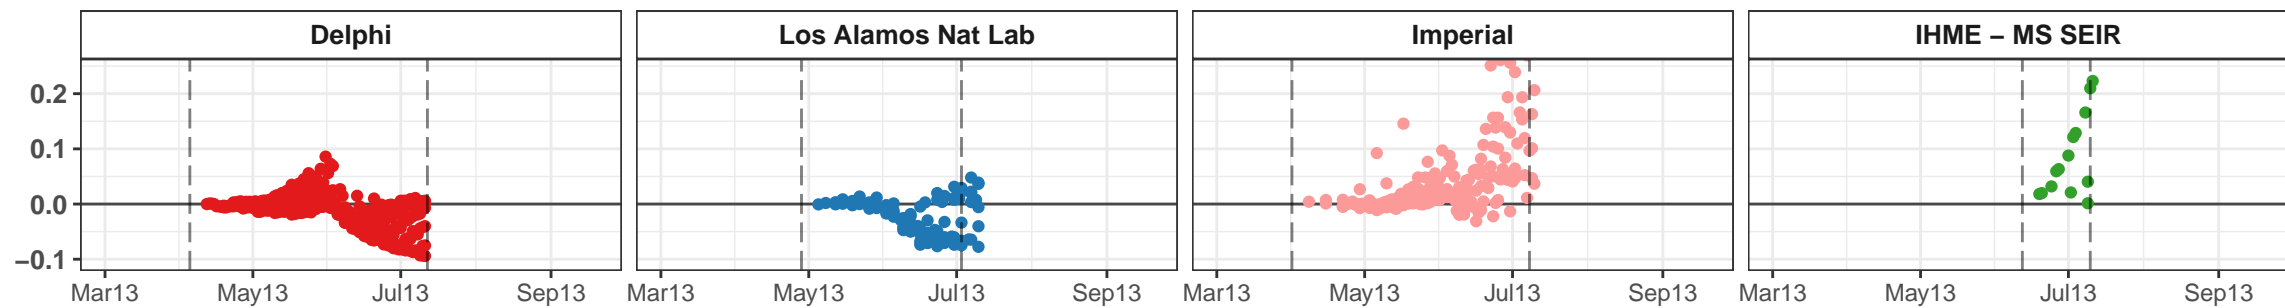

# Idaho

## Current Forecast

Delphi Los Alamos Nat Lab Youyang Gu IHME – MS SEIR ○ JHU △ NYT

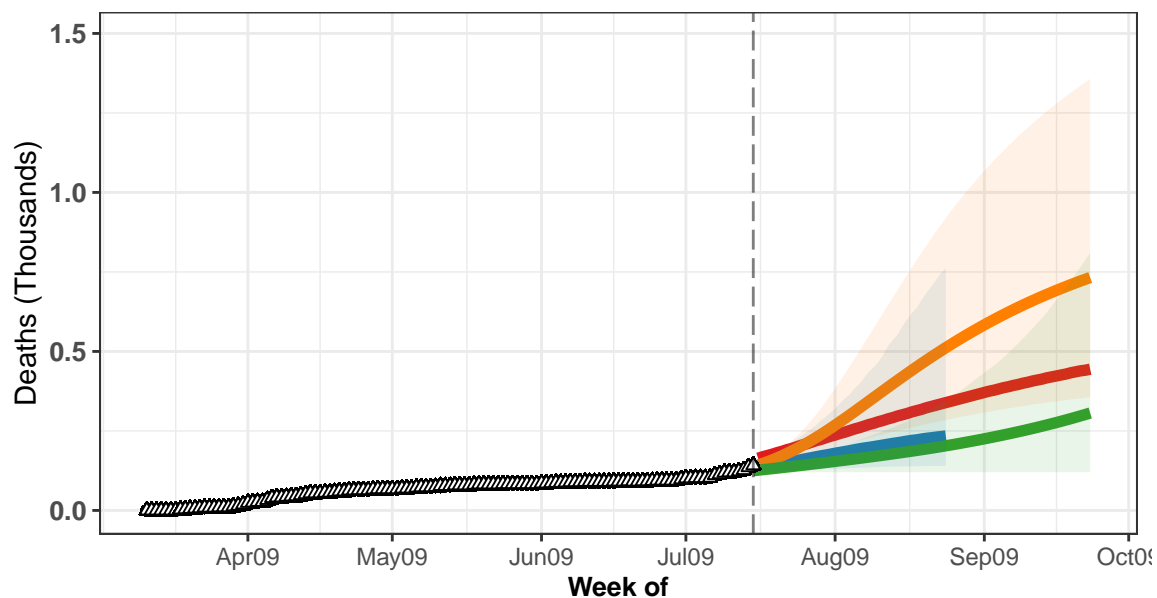

## Cumulative Out-Of-Sample Error (Post Intercept Shift)

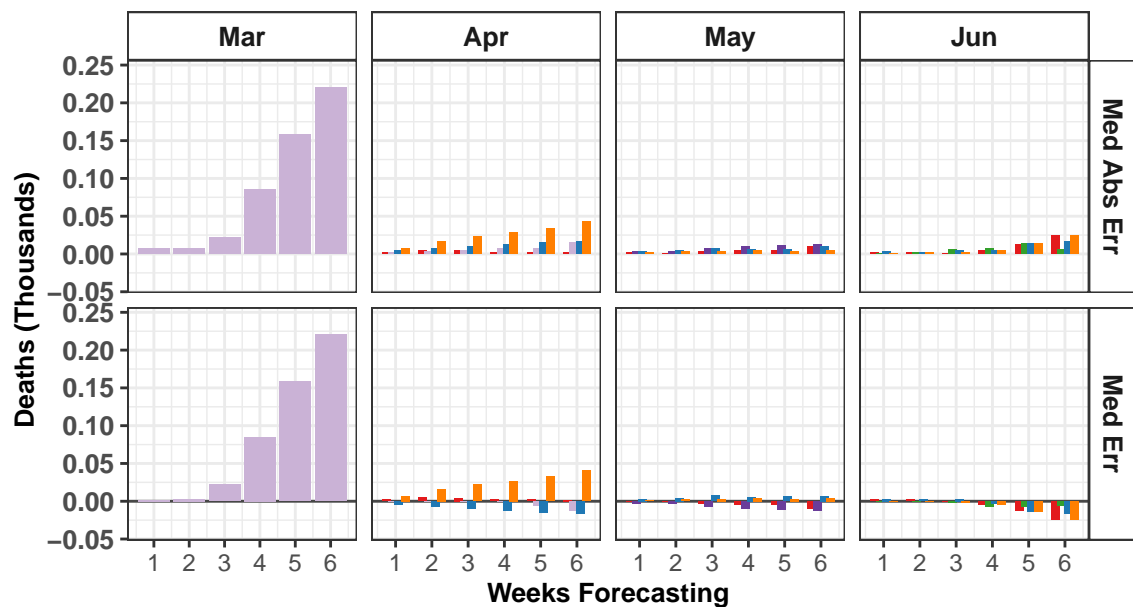

## All Model Versions

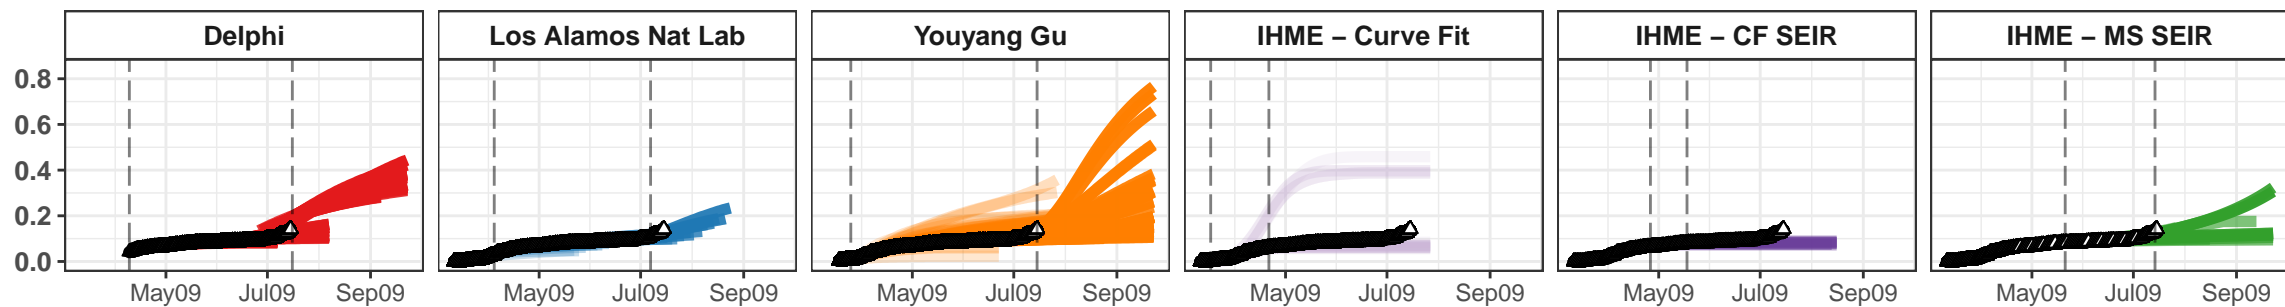

## All Cumulative Errors

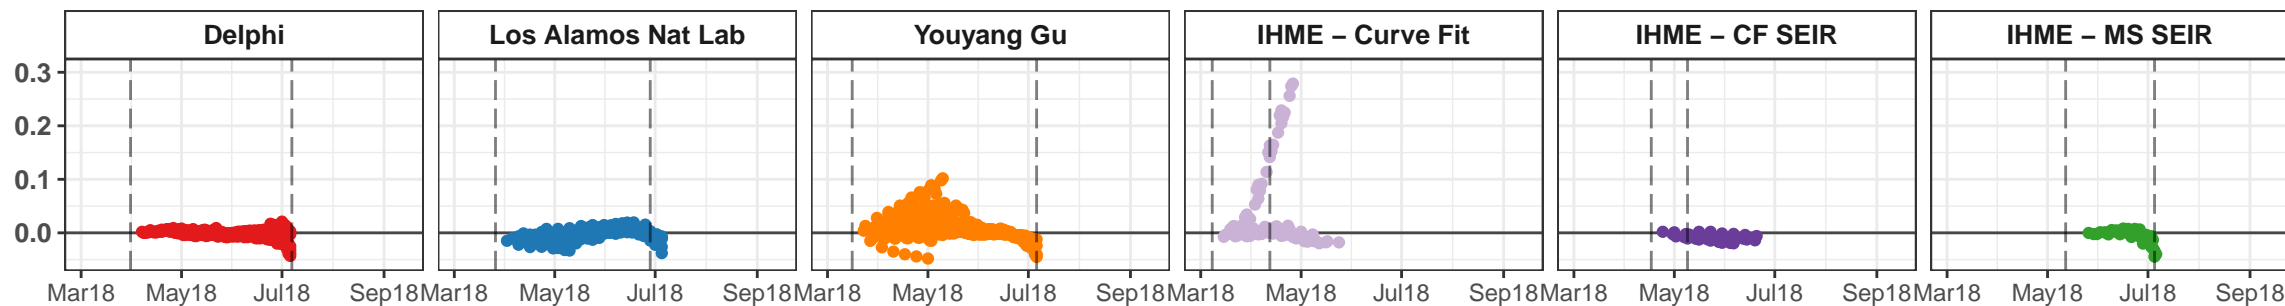

# Australia

## Current Forecast

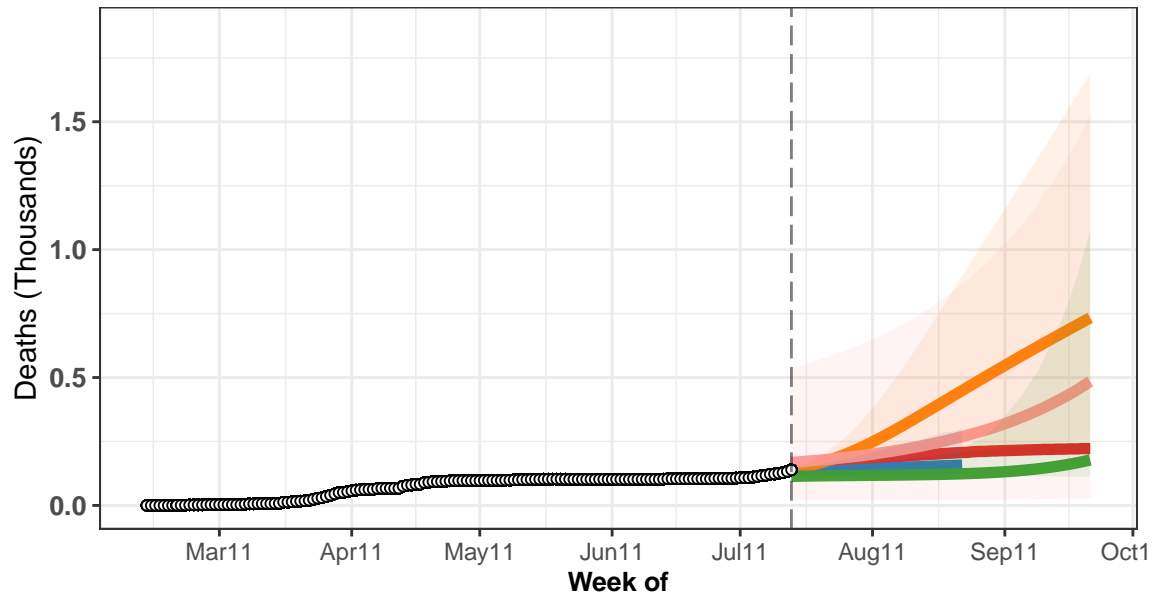

## Cumulative Out-Of-Sample Error (Post Intercept Shift)

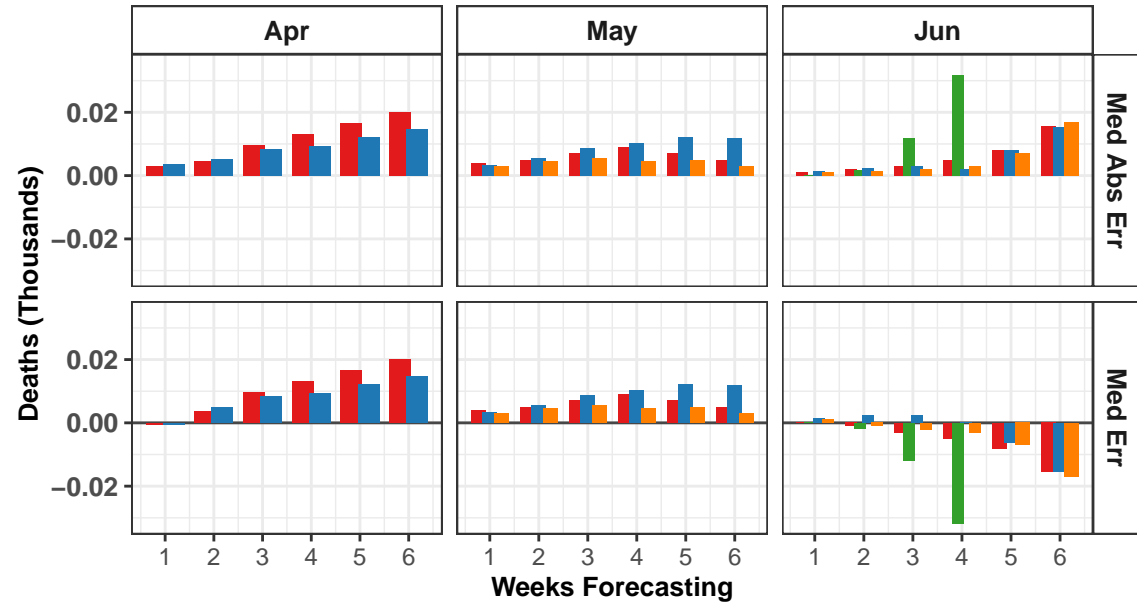

## All Model Versions

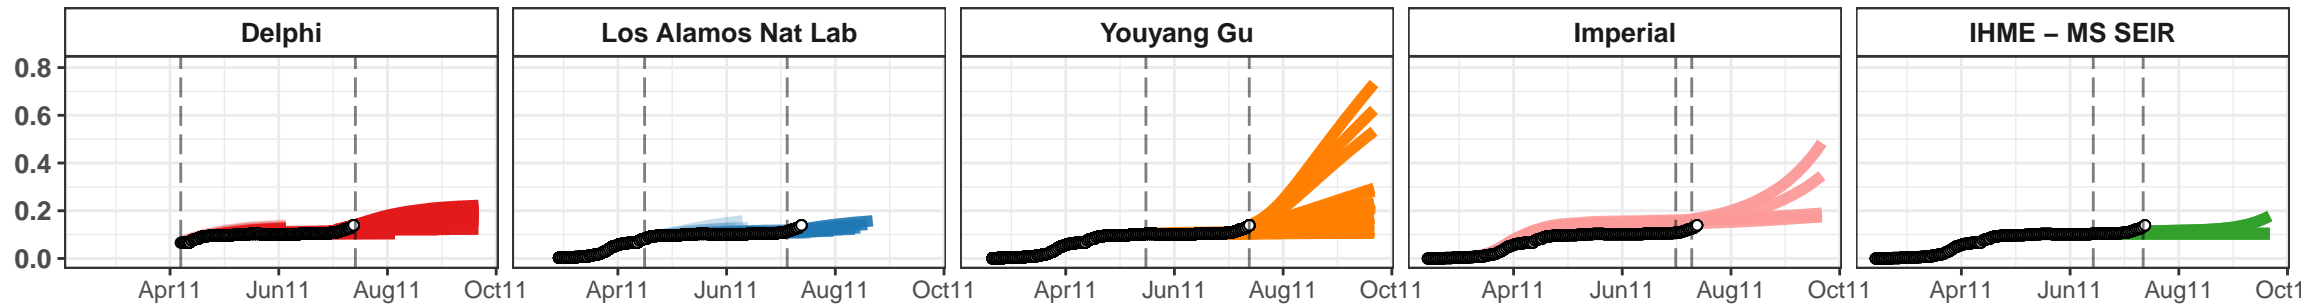

## All Cumulative Errors

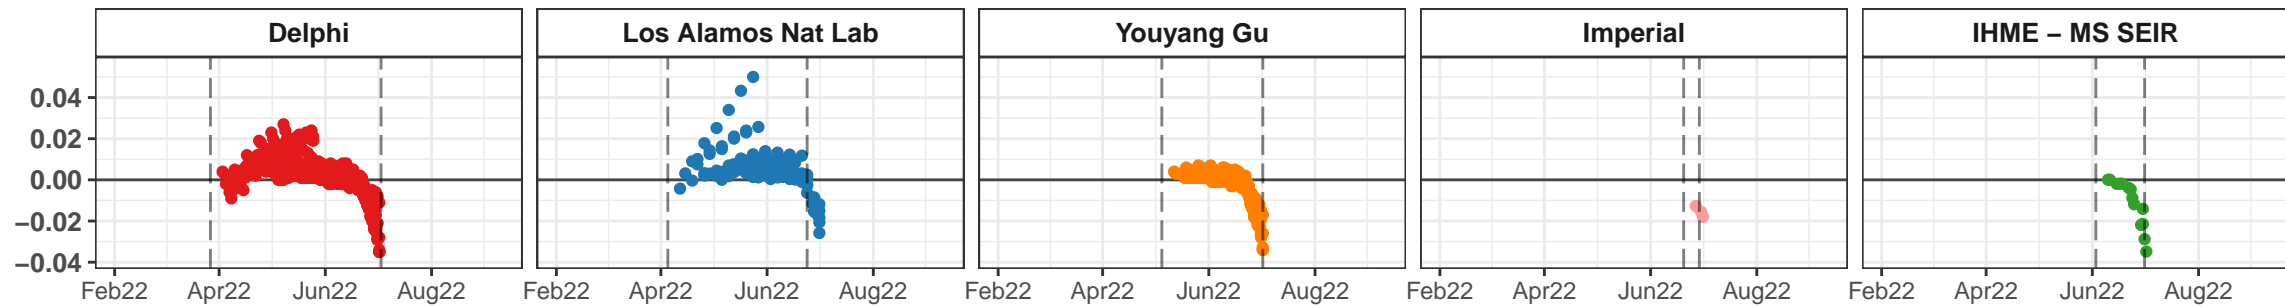

# Bahrain

## Current Forecast

Delphi Los Alamos Nat Lab Imperial IHME – MS SEIR

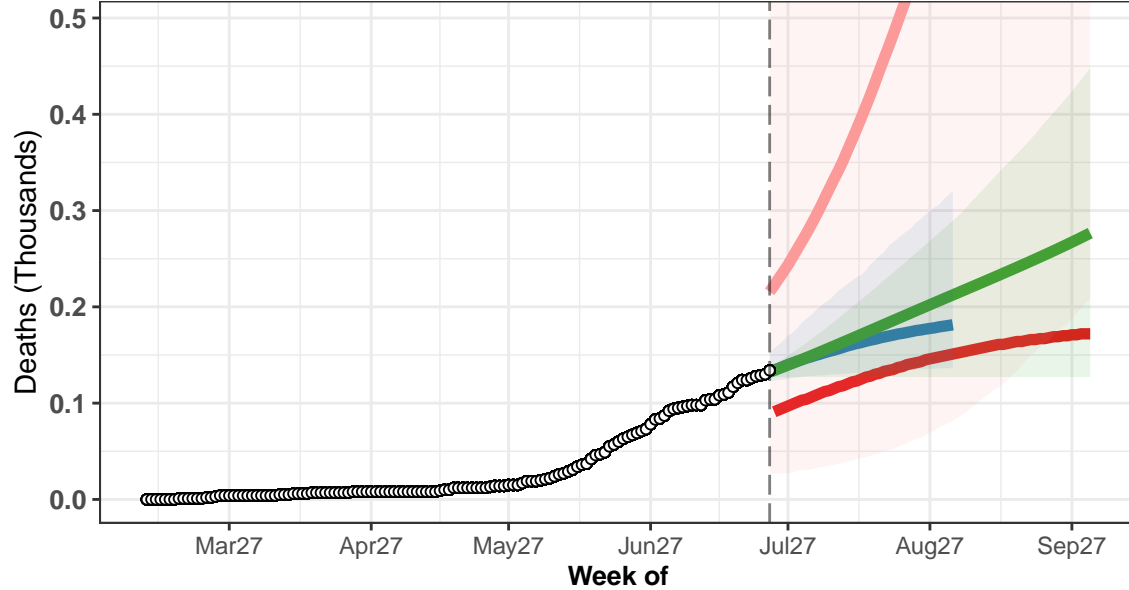

## Cumulative Out-Of-Sample Error (Post Intercept Shift)

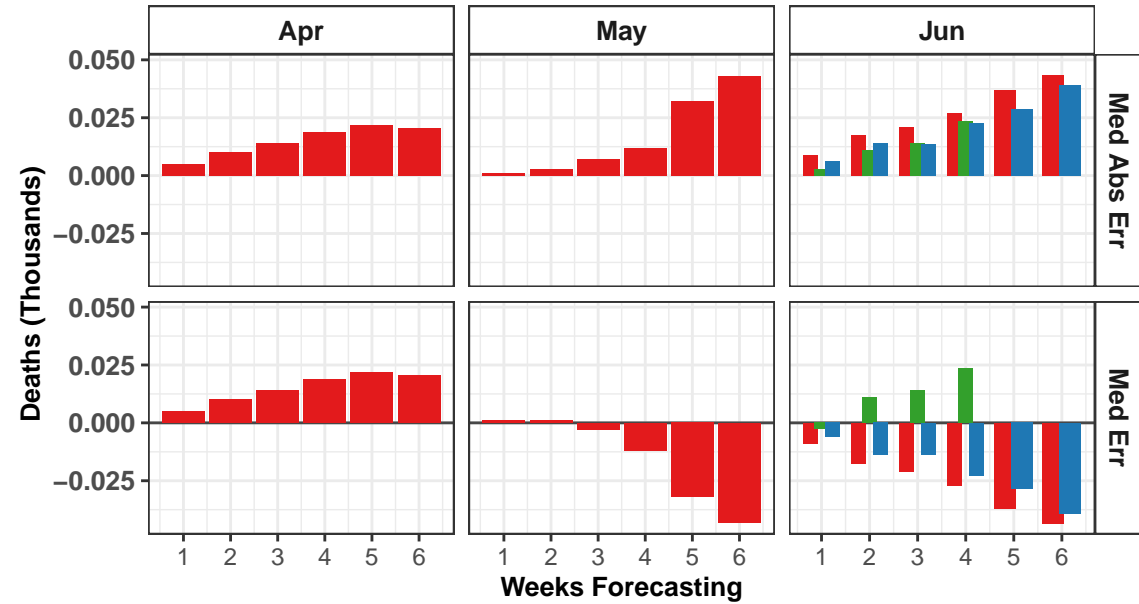

## All Model Versions

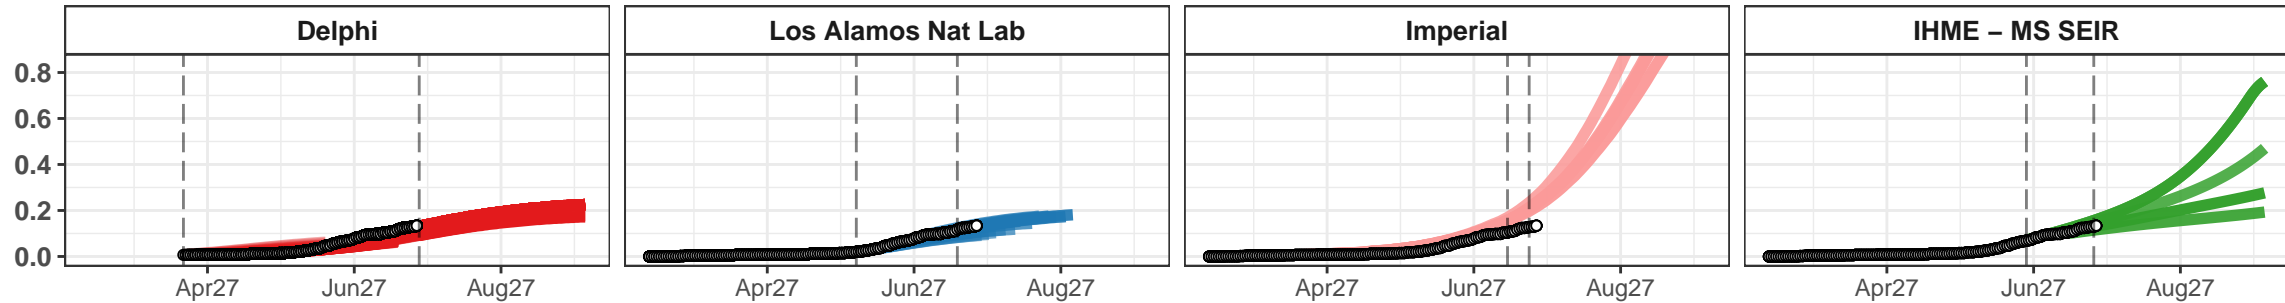

## All Cumulative Errors

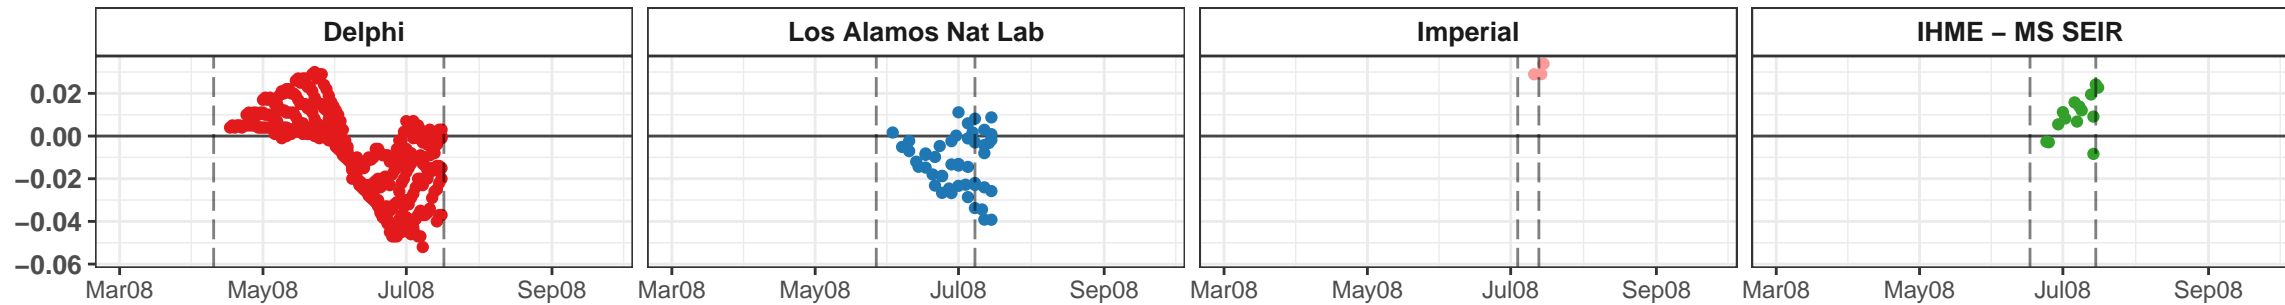

# Zambia

## Current Forecast

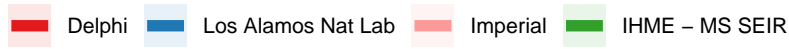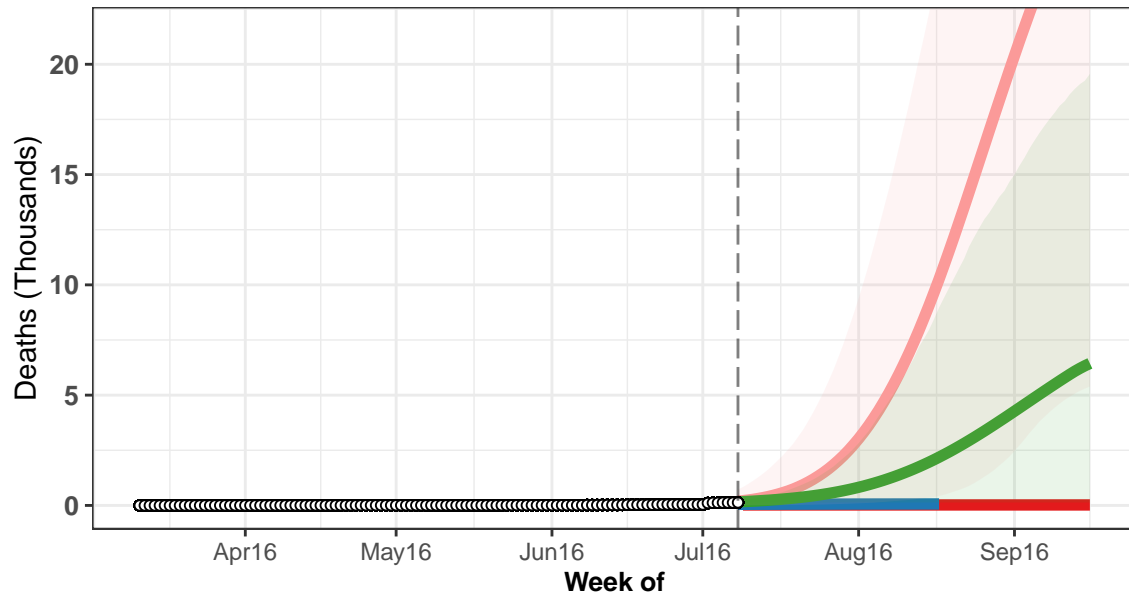

## Cumulative Out-Of-Sample Error (Post Intercept Shift)

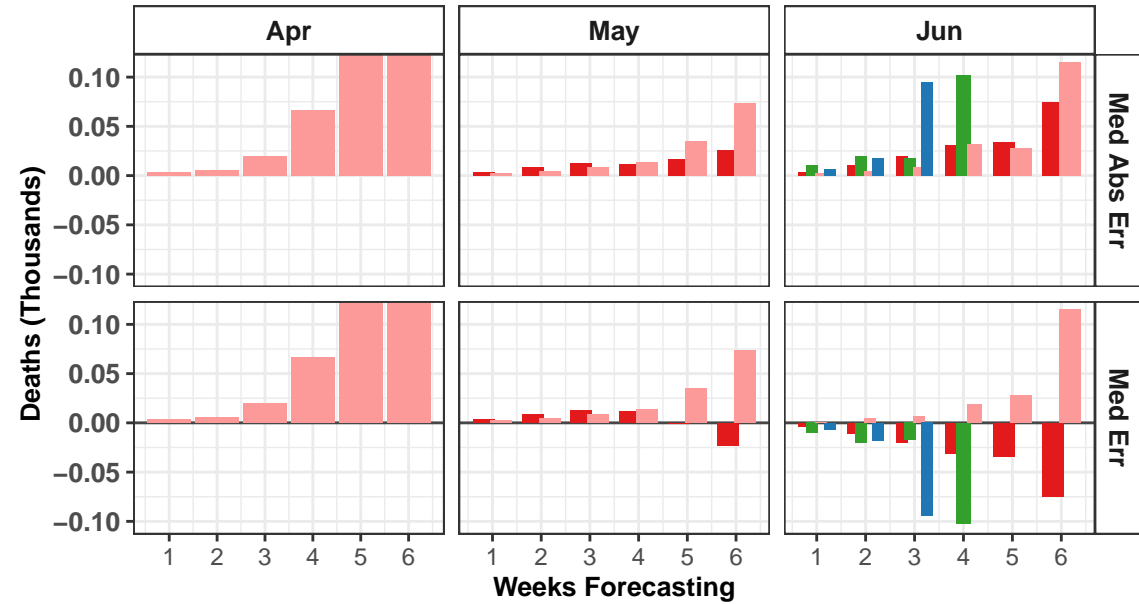

## All Model Versions

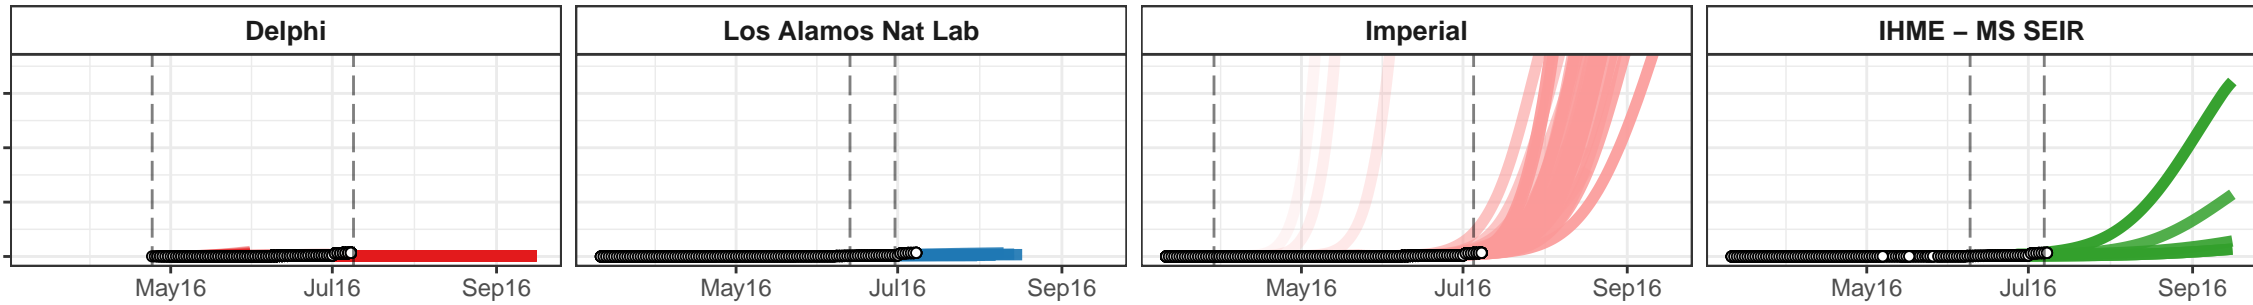

## All Cumulative Errors

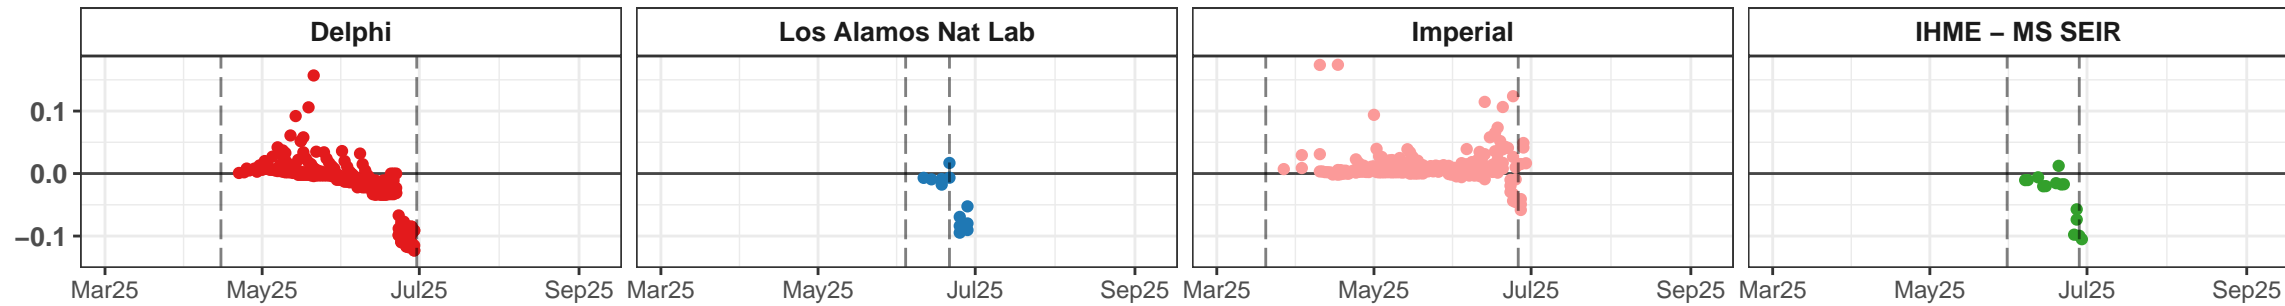



# Venezuela

## Current Forecast

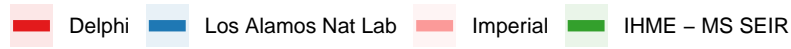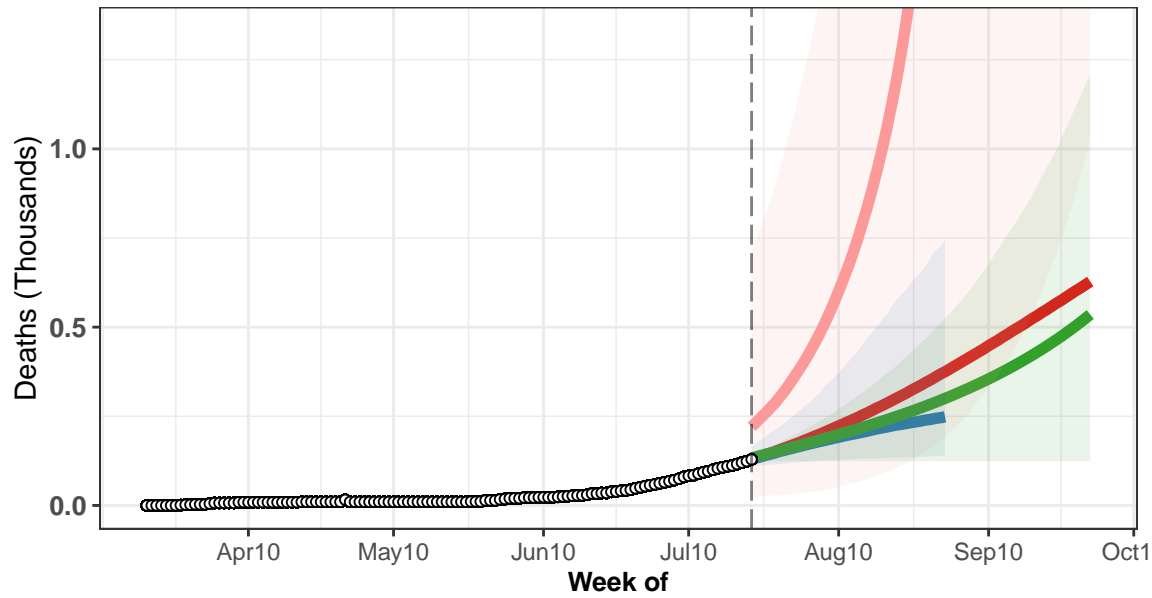

## Cumulative Out-Of-Sample Error (Post Intercept Shift)

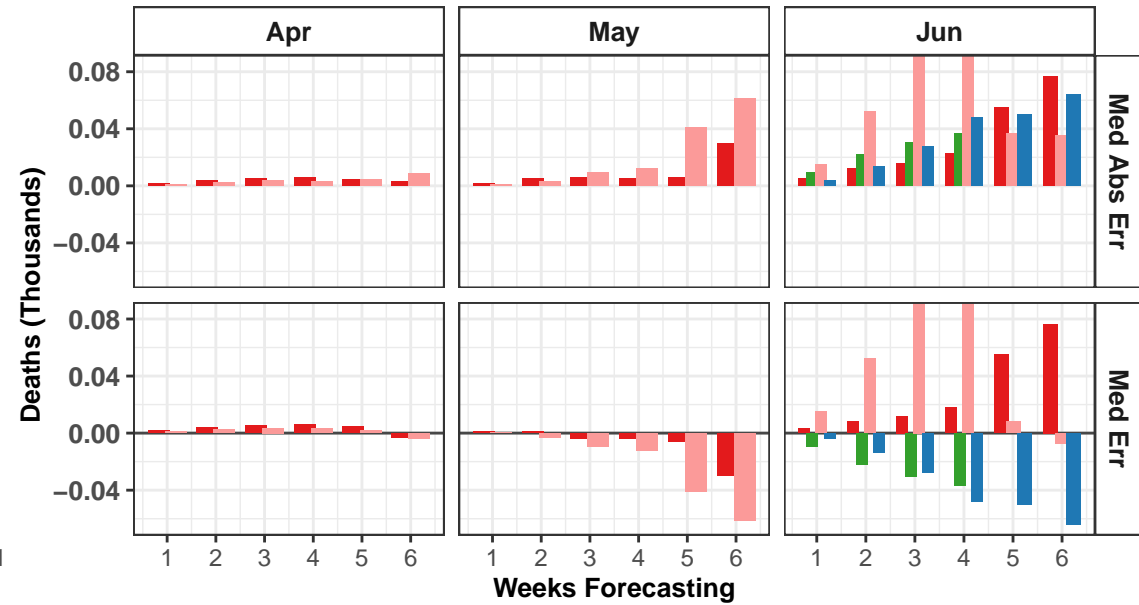

## All Model Versions

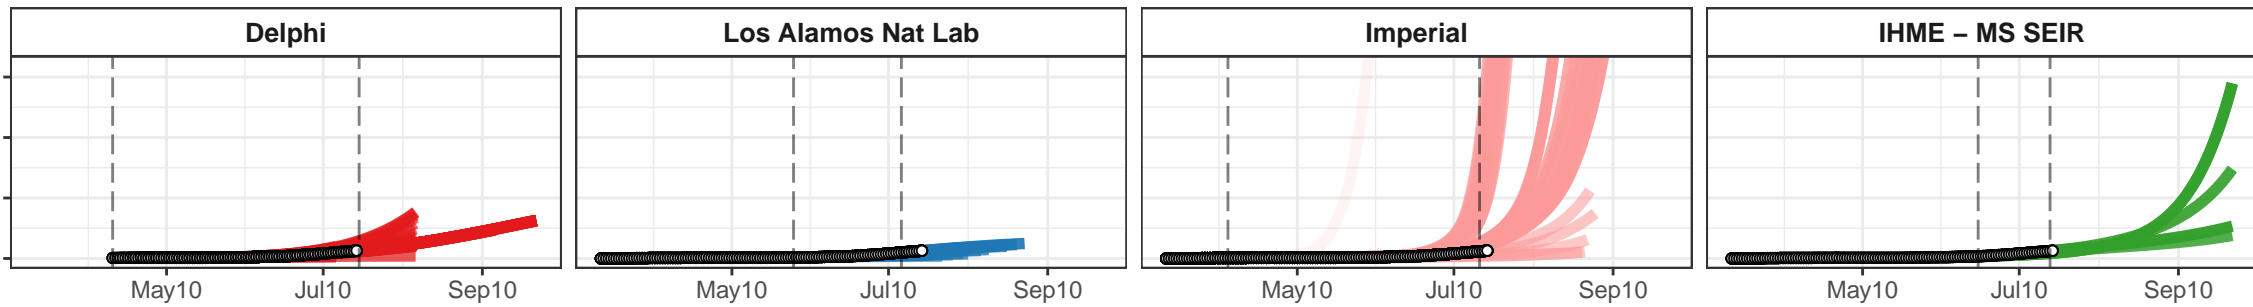

## All Cumulative Errors

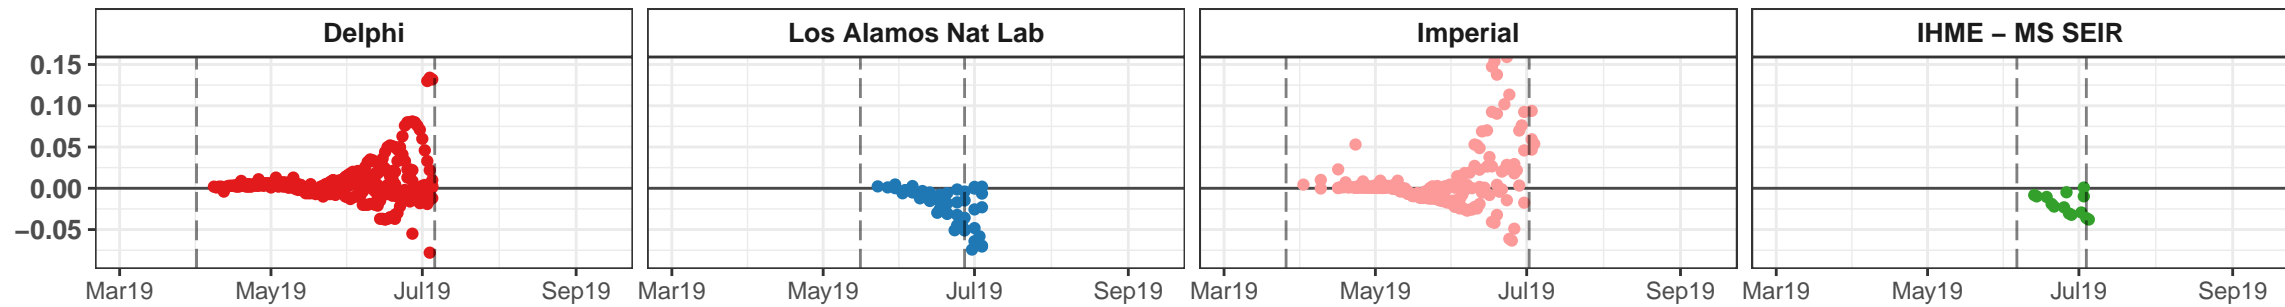

# Croatia

## Current Forecast

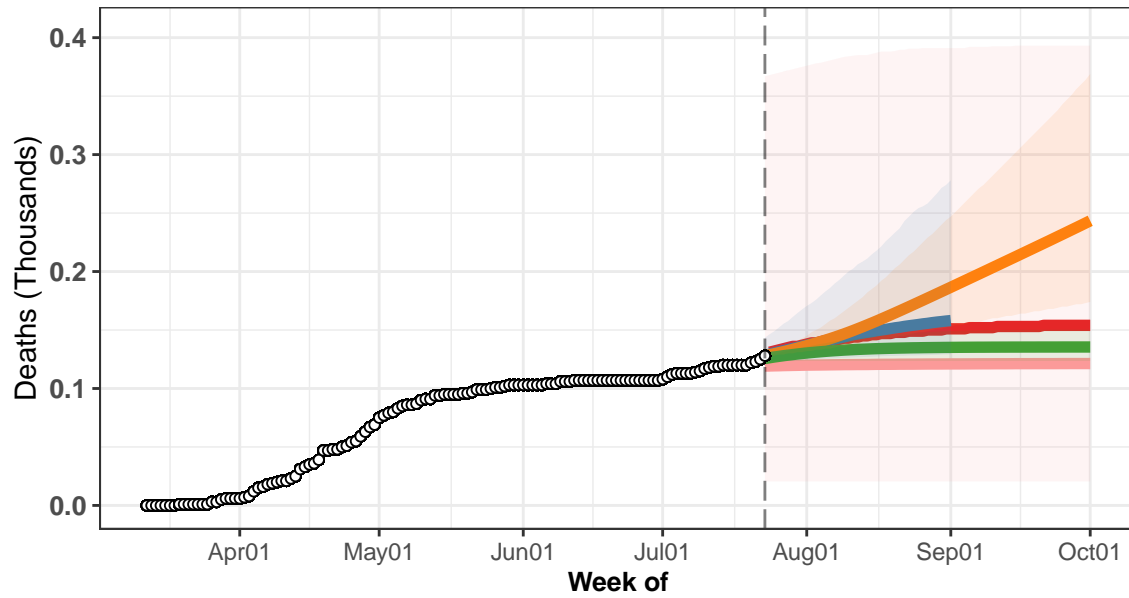

## Cumulative Out-Of-Sample Error (Post Intercept Shift)

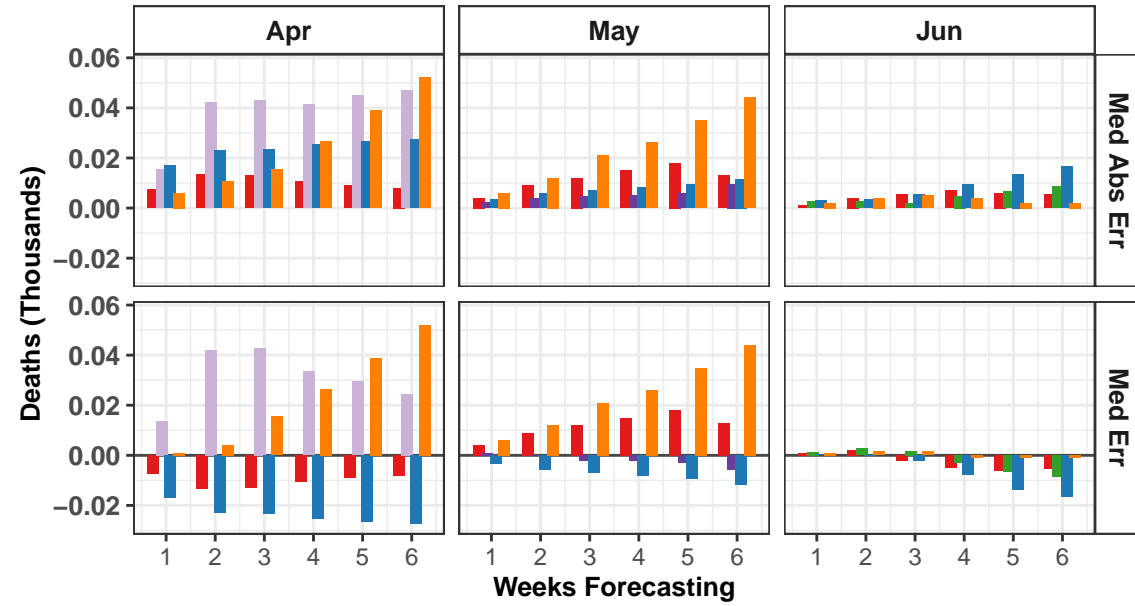

## All Model Versions

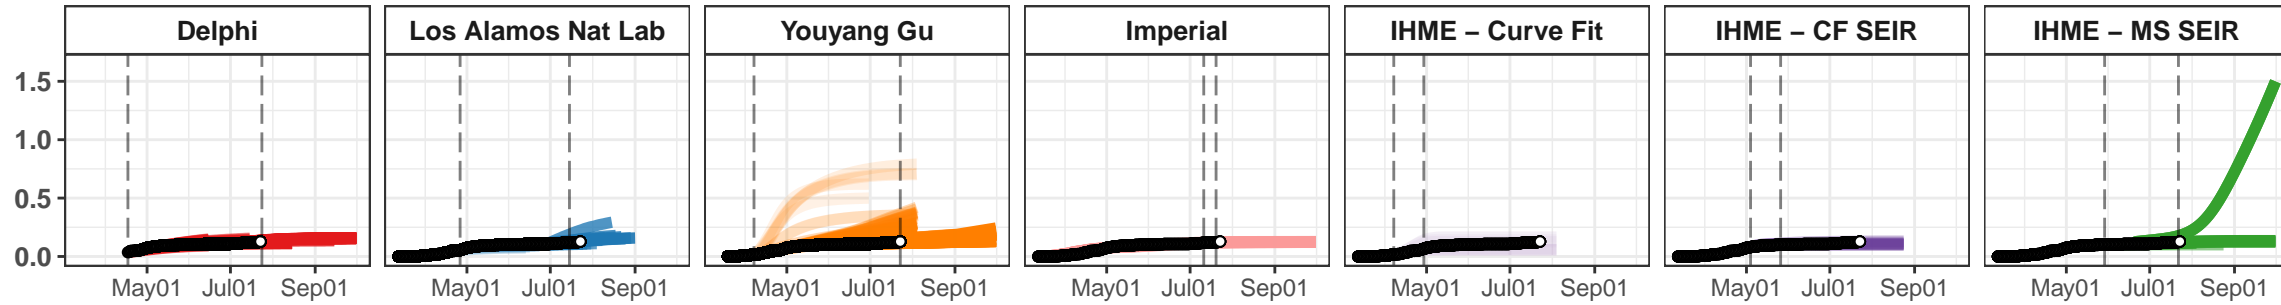

## All Cumulative Errors

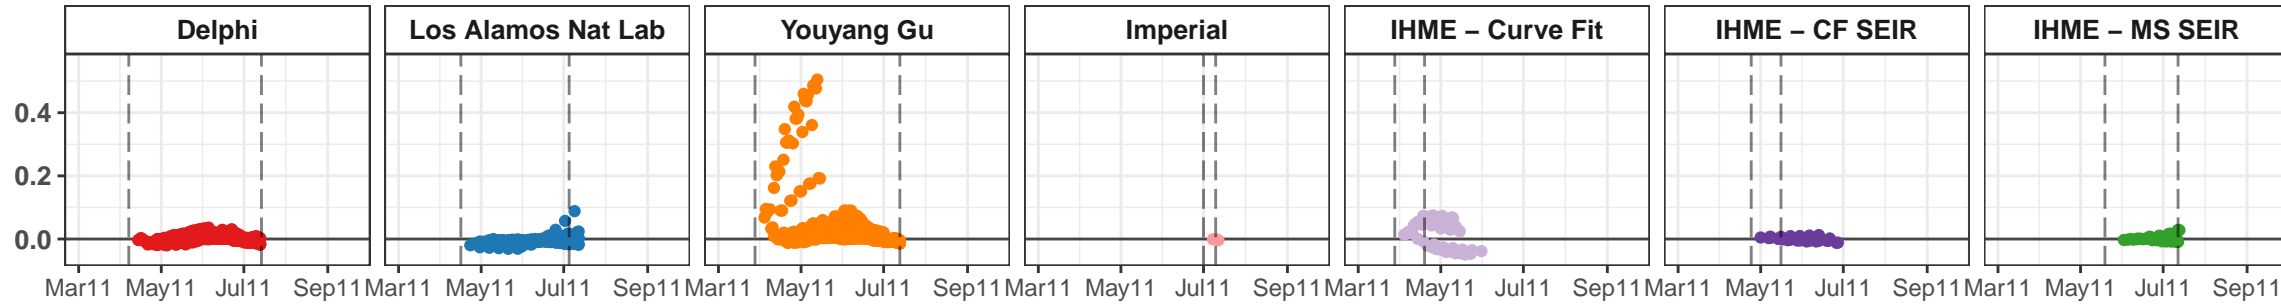

# Albania

## Current Forecast

Delphi Los Alamos Nat Lab Imperial IHME – MS SEIR

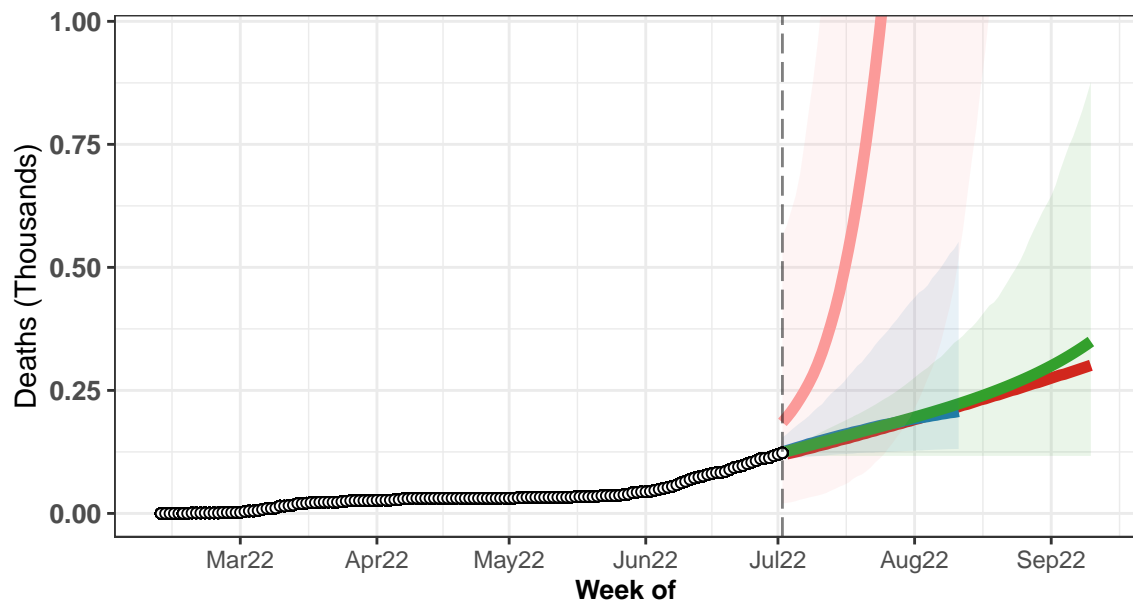

## Cumulative Out-Of-Sample Error (Post Intercept Shift)

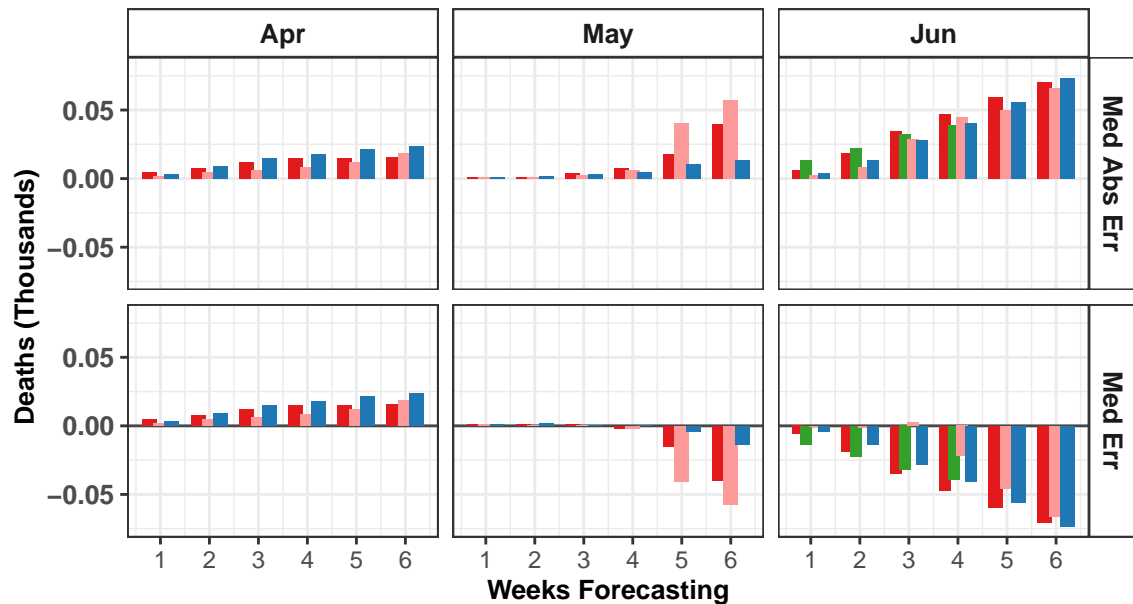

## All Model Versions

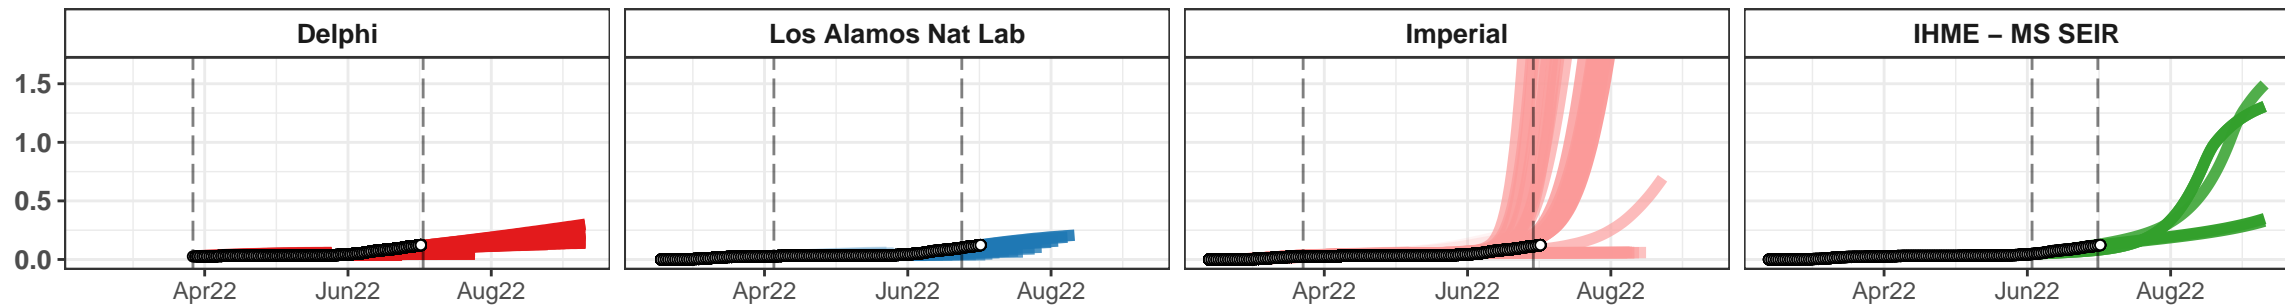

## All Cumulative Errors

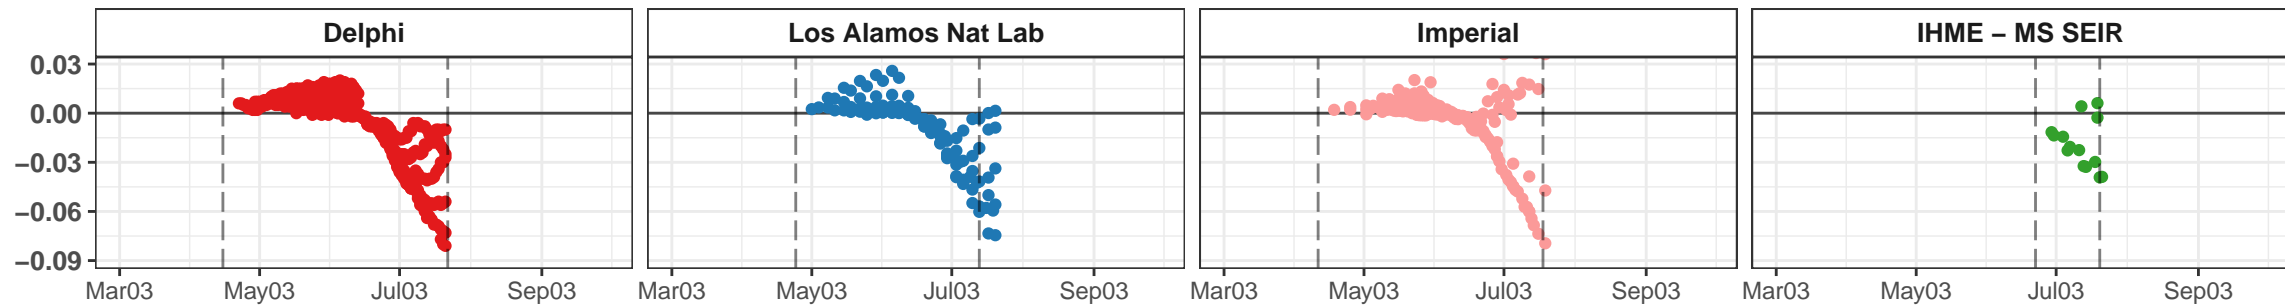

# Malaysia

## Current Forecast

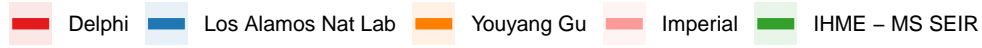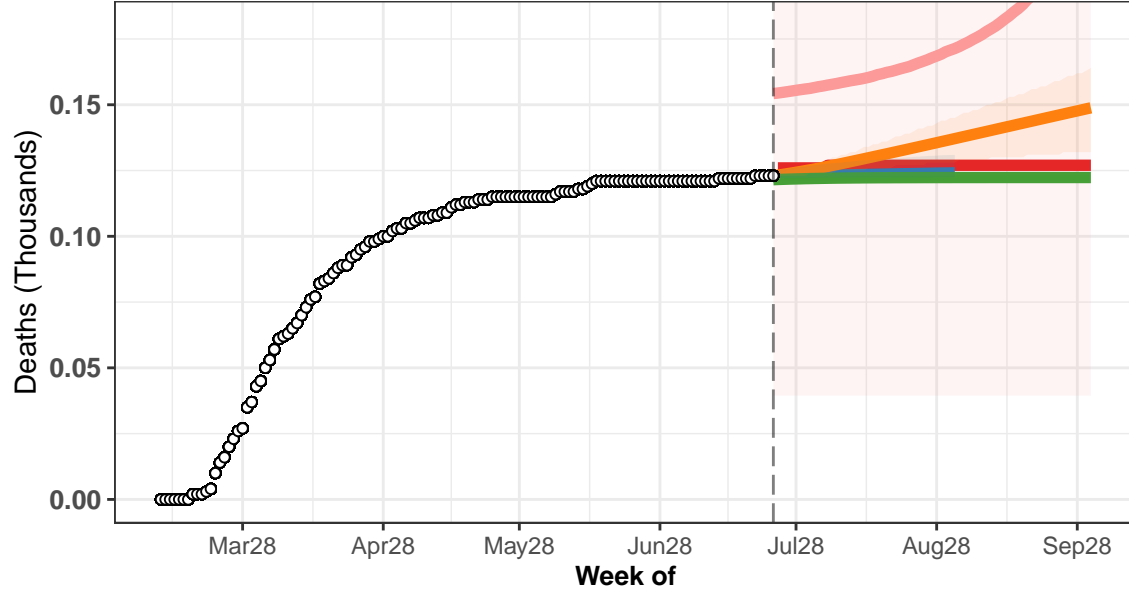

## Cumulative Out-Of-Sample Error (Post Intercept Shift)

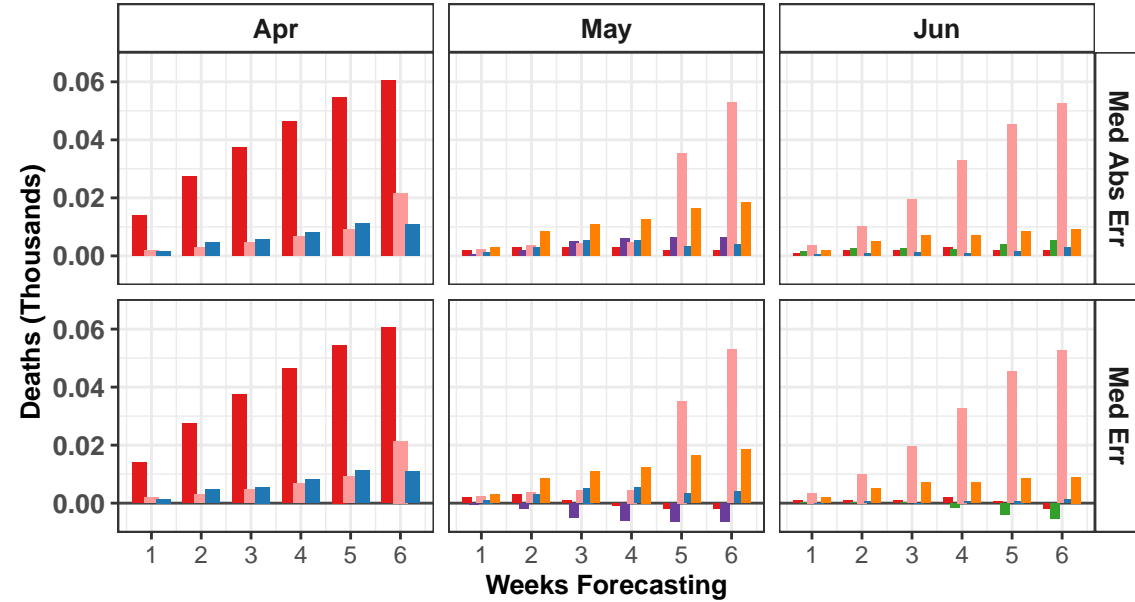

## All Model Versions

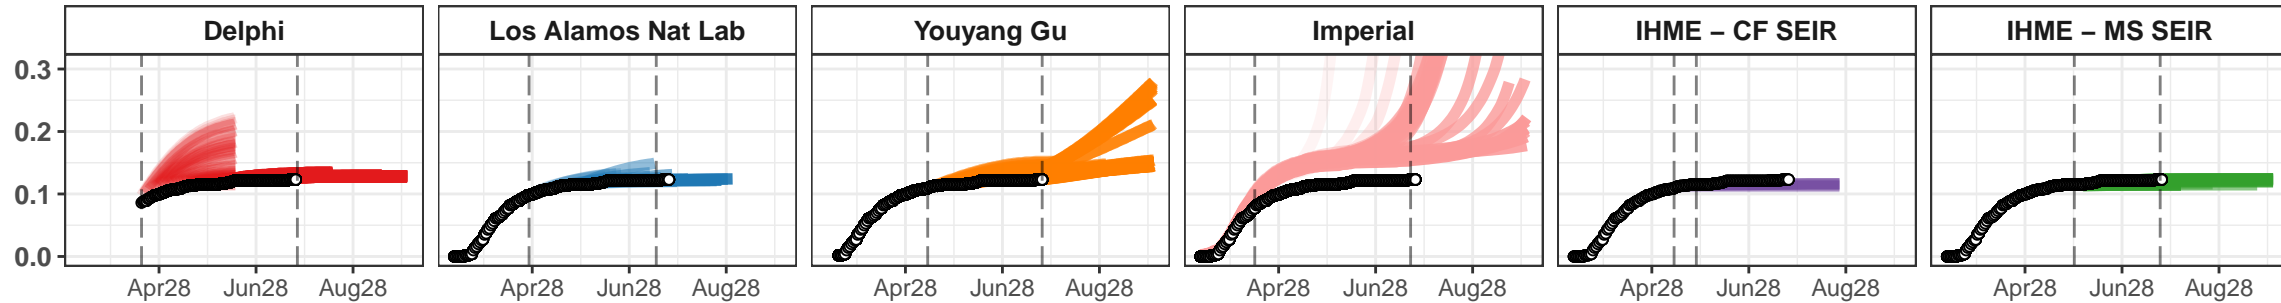

## All Cumulative Errors

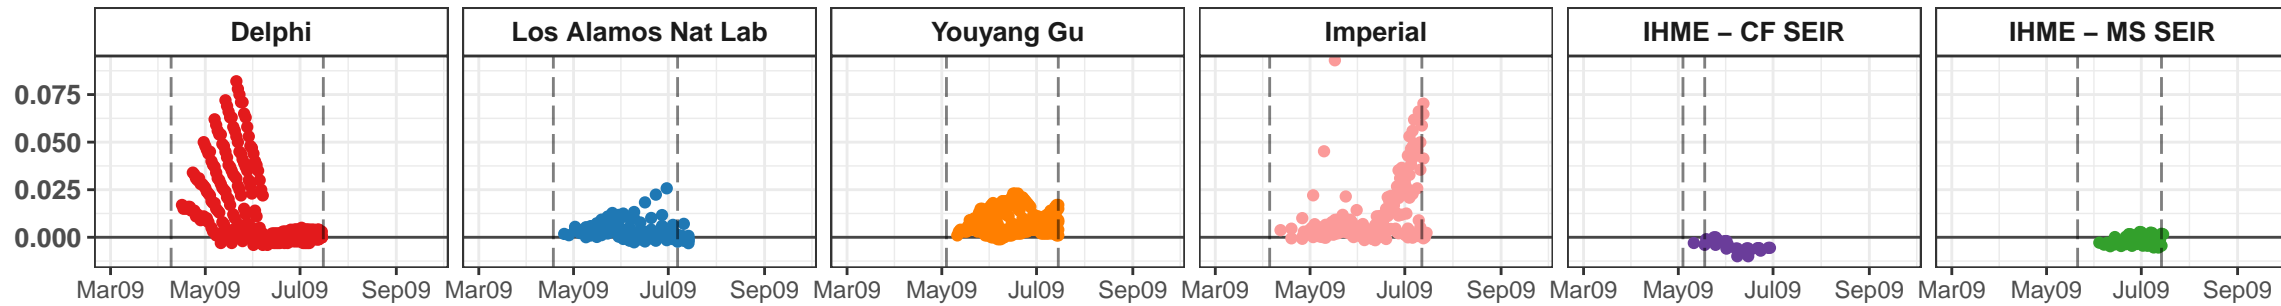

# Mali

## Current Forecast

Delphi Los Alamos Nat Lab Imperial IHME – MS SEIR

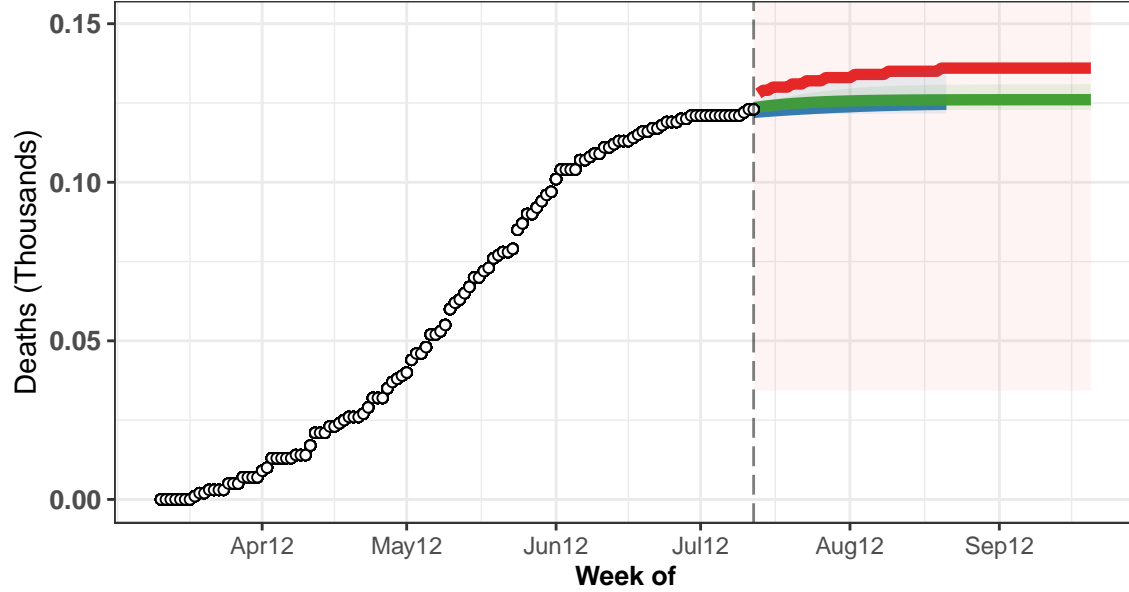

## Cumulative Out-Of-Sample Error (Post Intercept Shift)

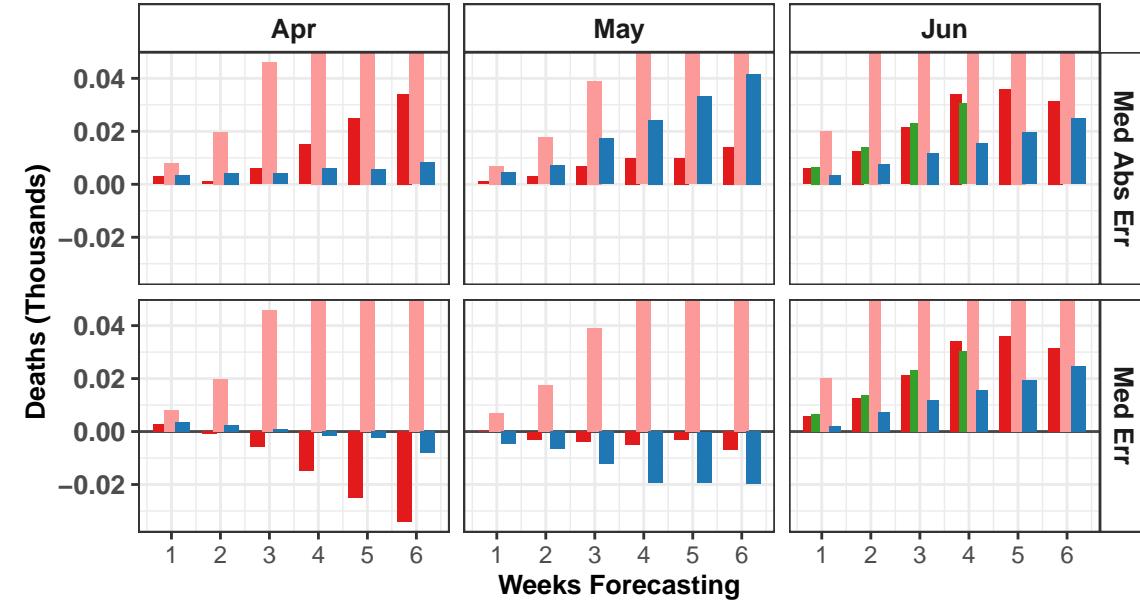

## All Model Versions

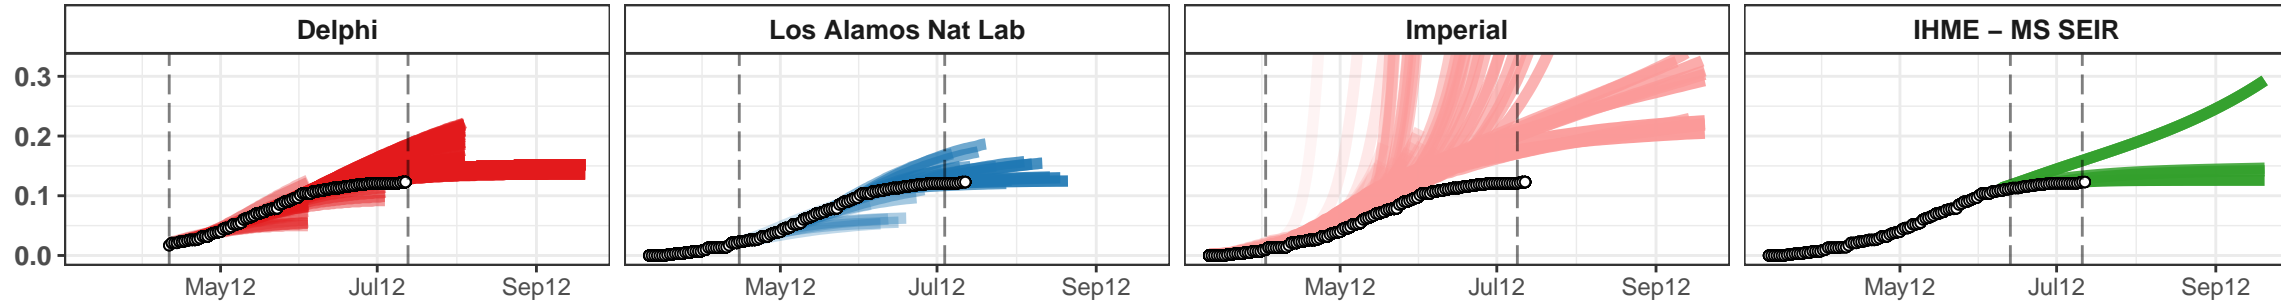

## All Cumulative Errors

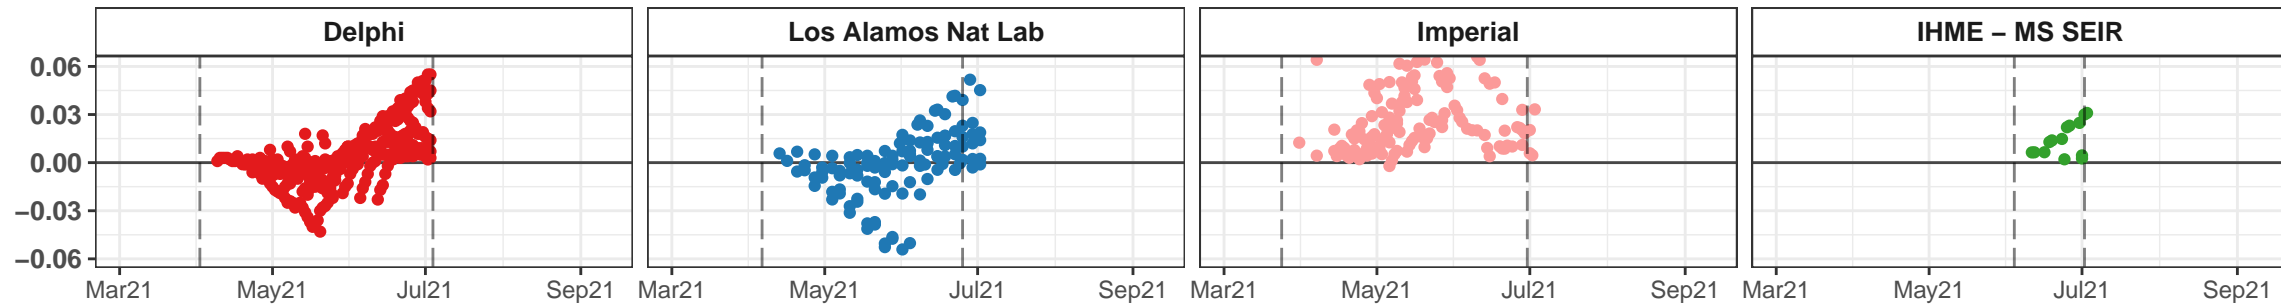

# South Dakota

## Current Forecast

Delphi Los Alamos Nat Lab Youyang Gu IHME - MS SEIR ○ JHU △ NYT

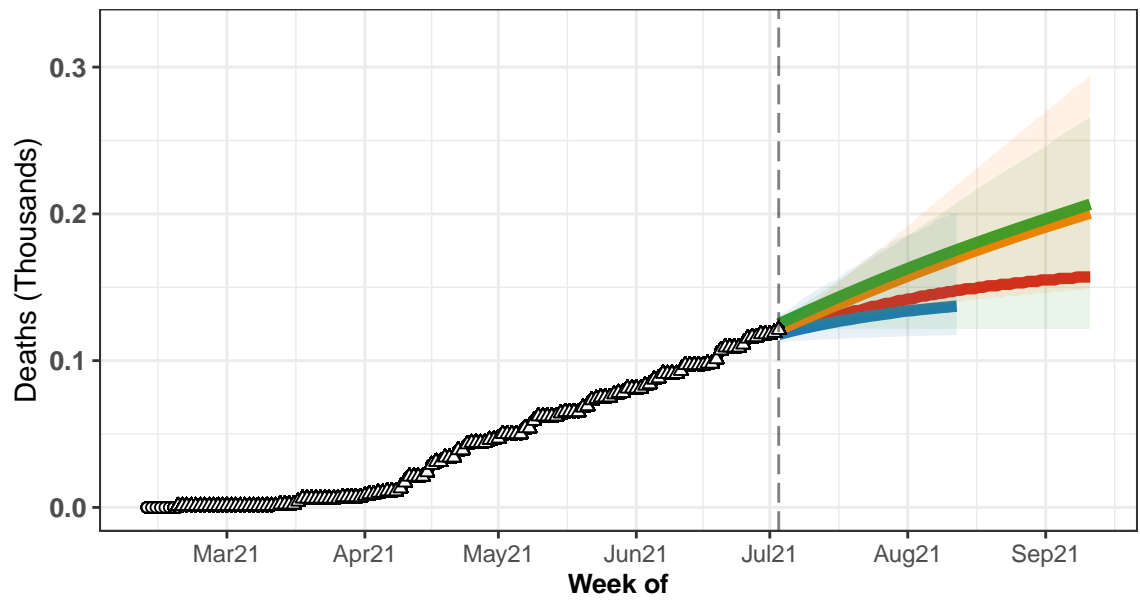

## Cumulative Out-Of-Sample Error (Post Intercept Shift)

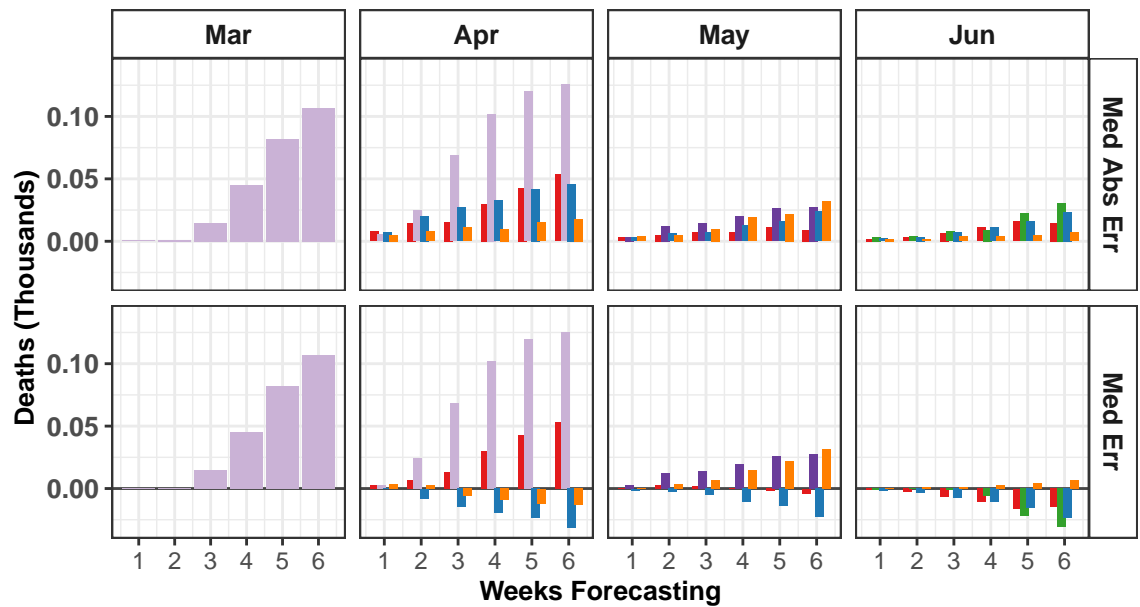

## All Model Versions

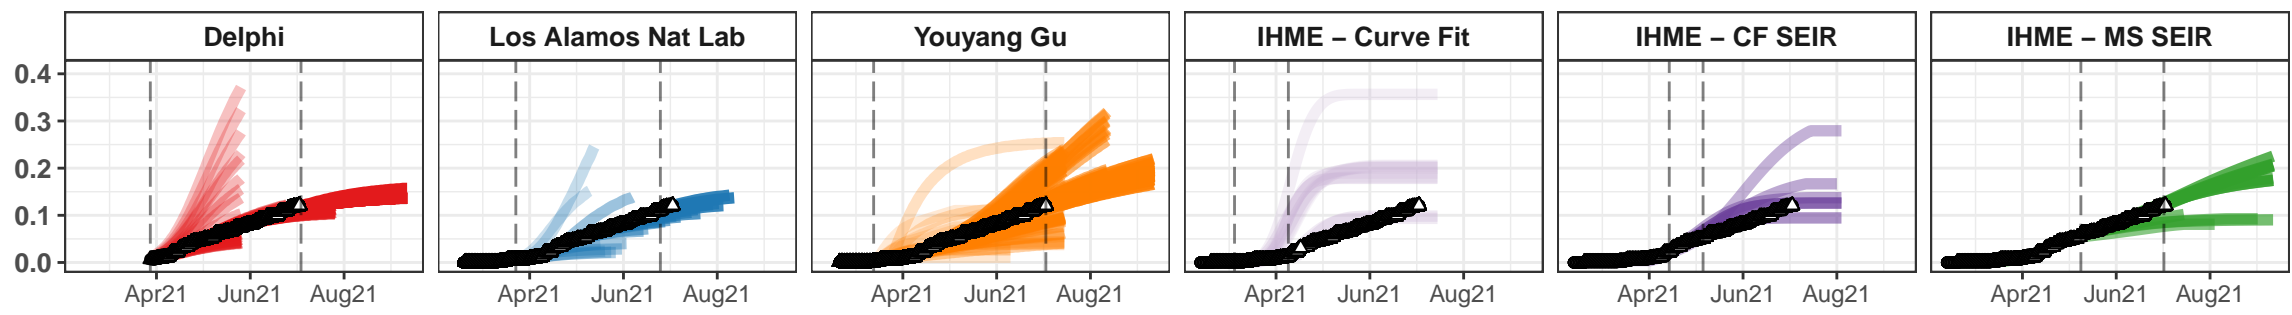

## All Cumulative Errors

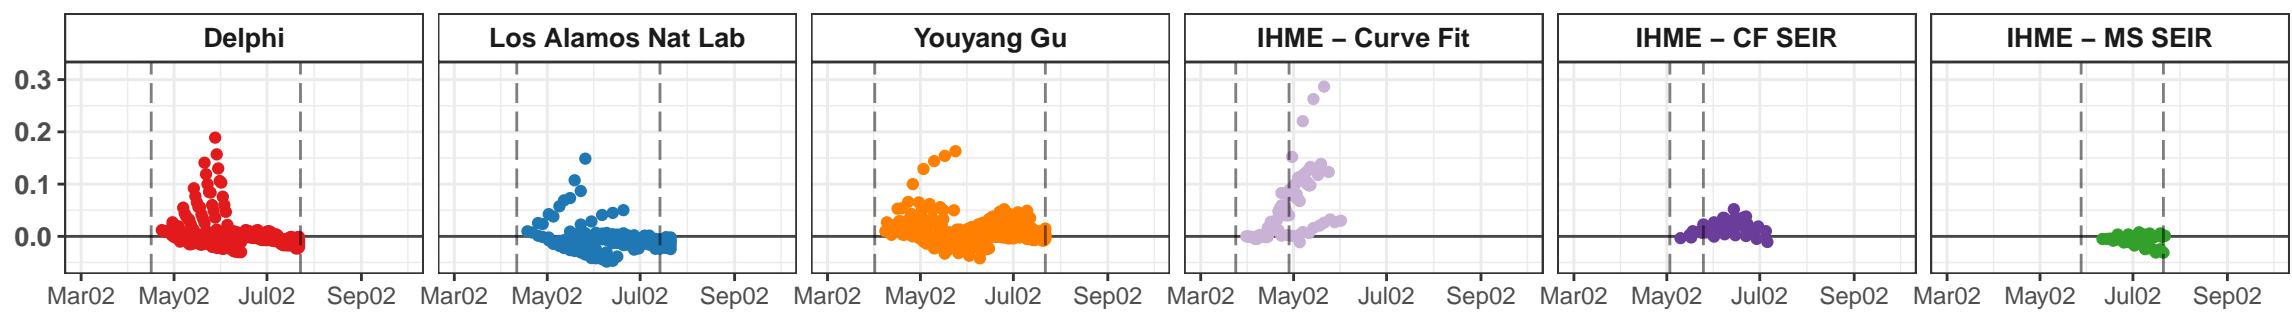

# Maine

## Current Forecast

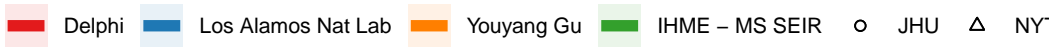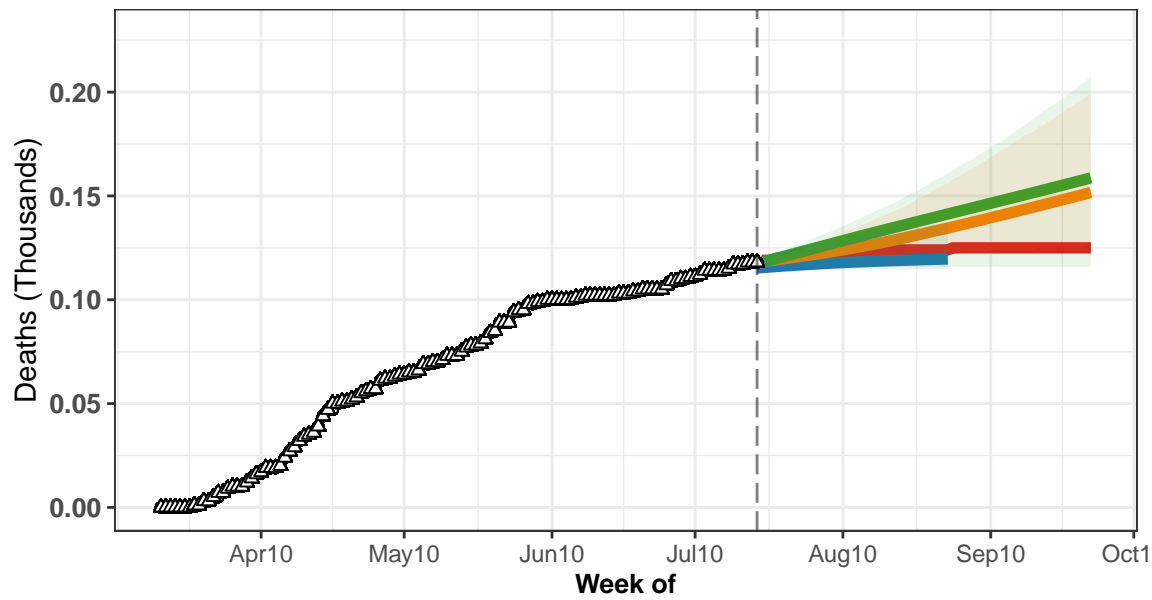

## Cumulative Out-Of-Sample Error (Post Intercept Shift)

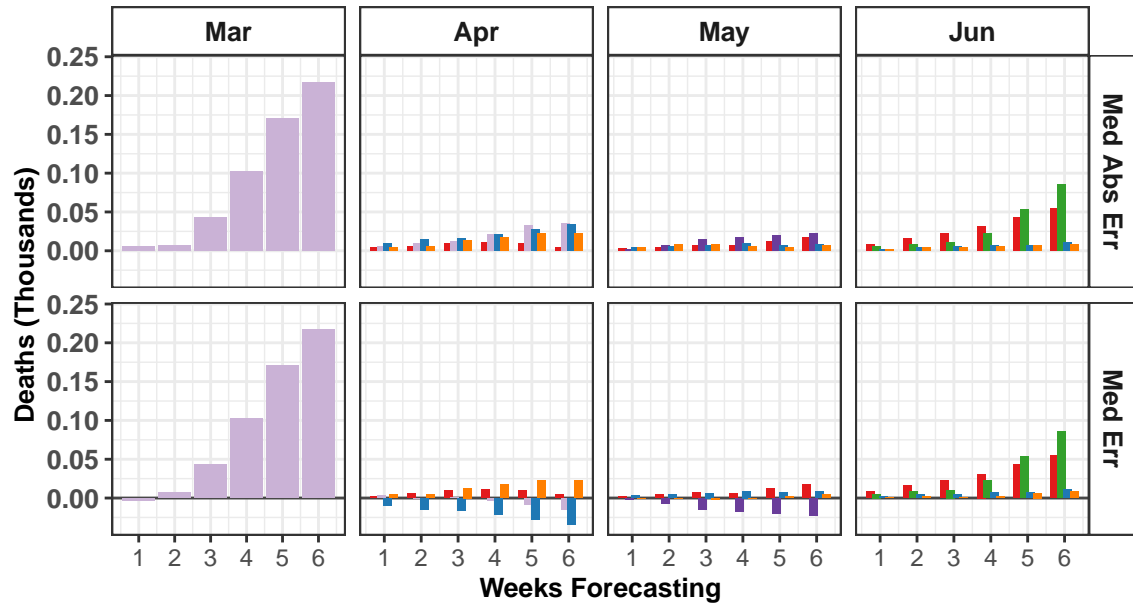

## All Model Versions

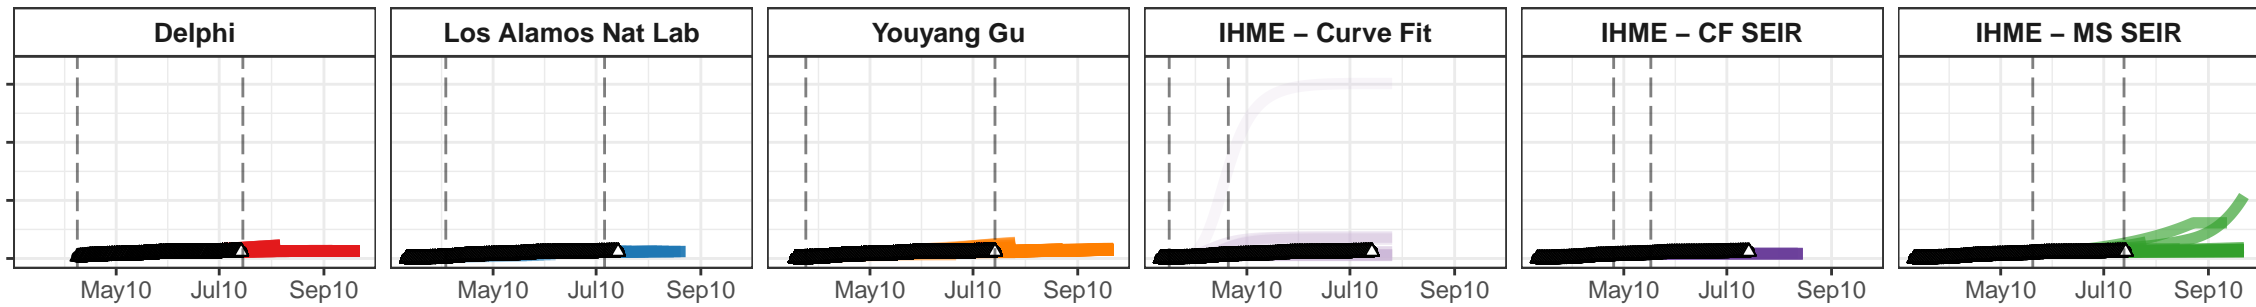

## All Cumulative Errors

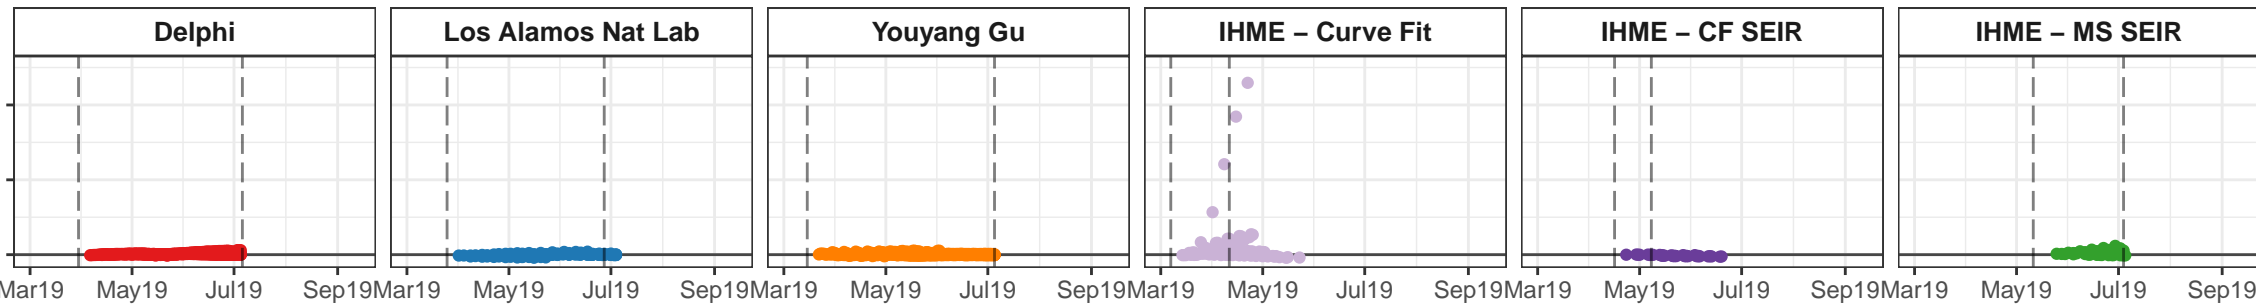

# Slovenia

## Current Forecast

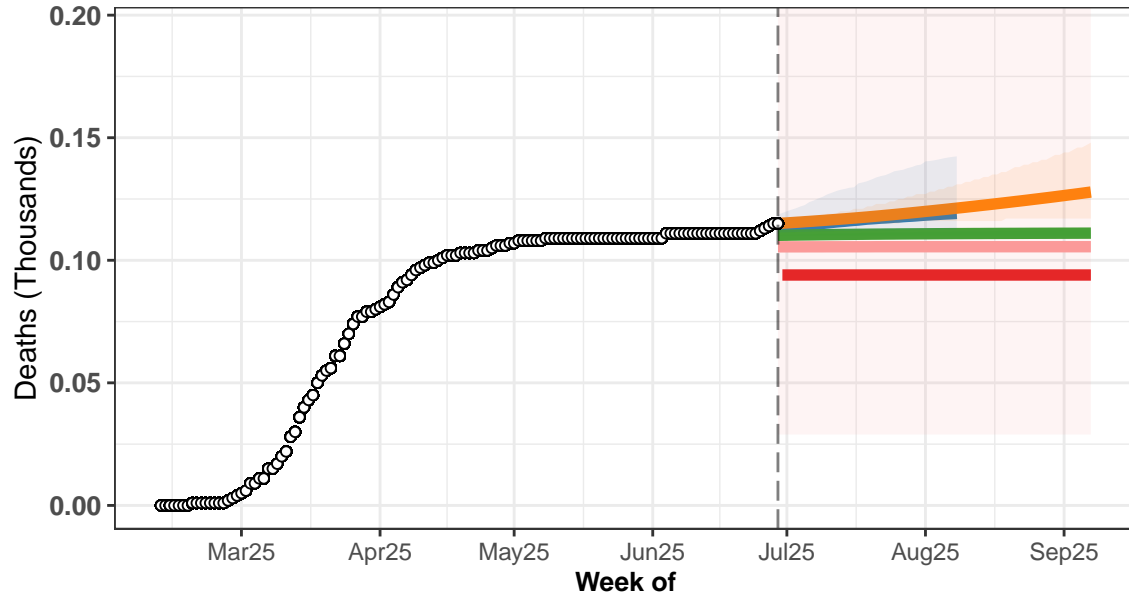

## Cumulative Out-Of-Sample Error (Post Intercept Shift)

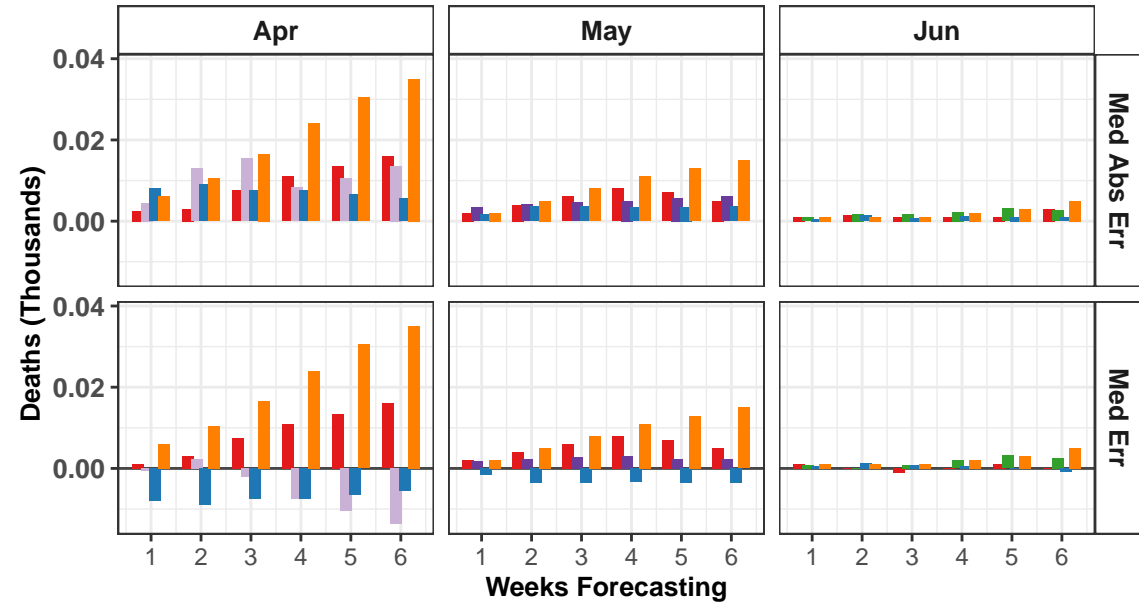

## All Model Versions

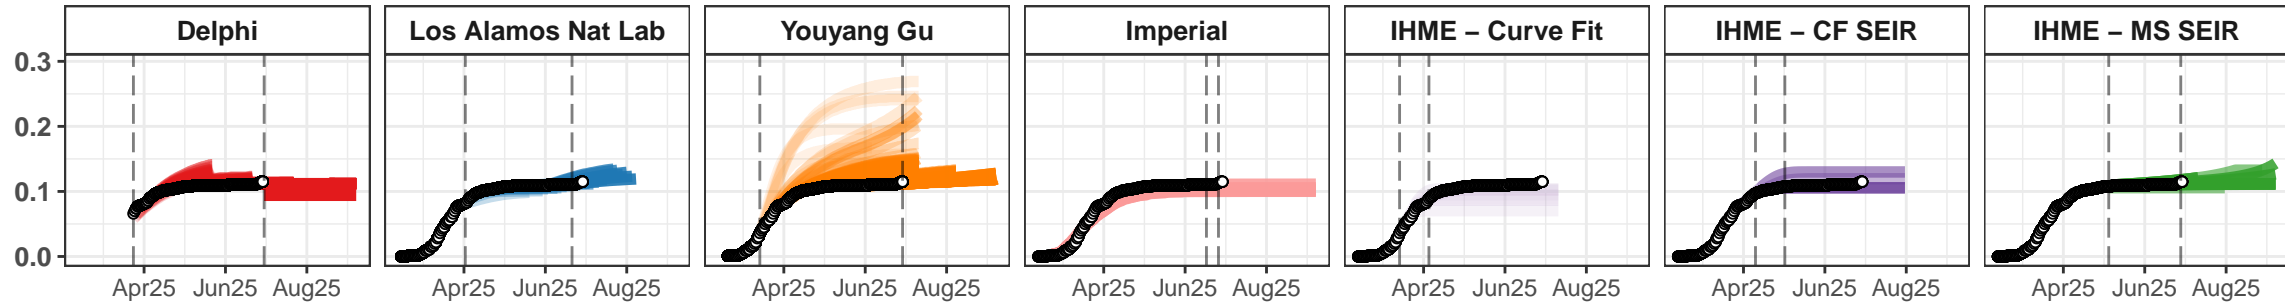

## All Cumulative Errors

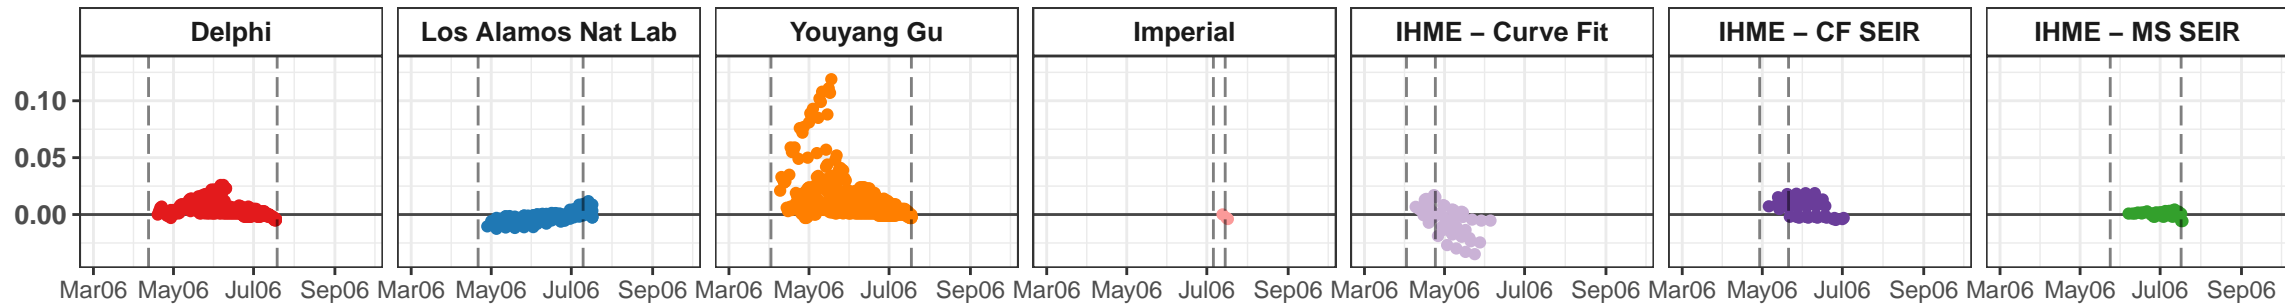



# Luxembourg

## Current Forecast

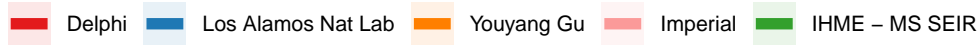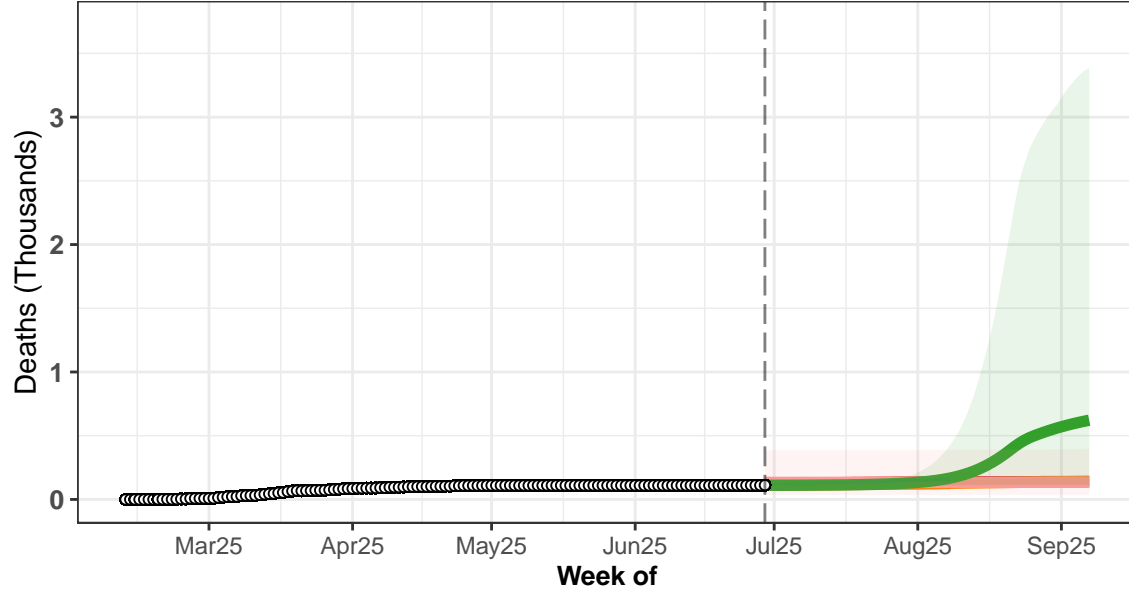

## Cumulative Out-Of-Sample Error (Post Intercept Shift)

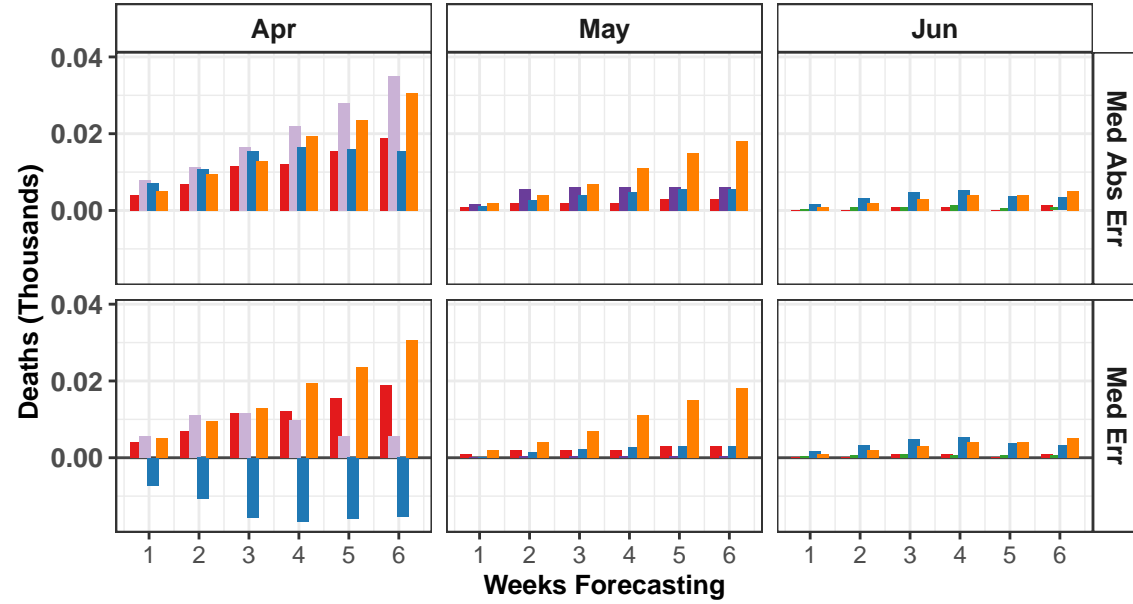

## All Model Versions

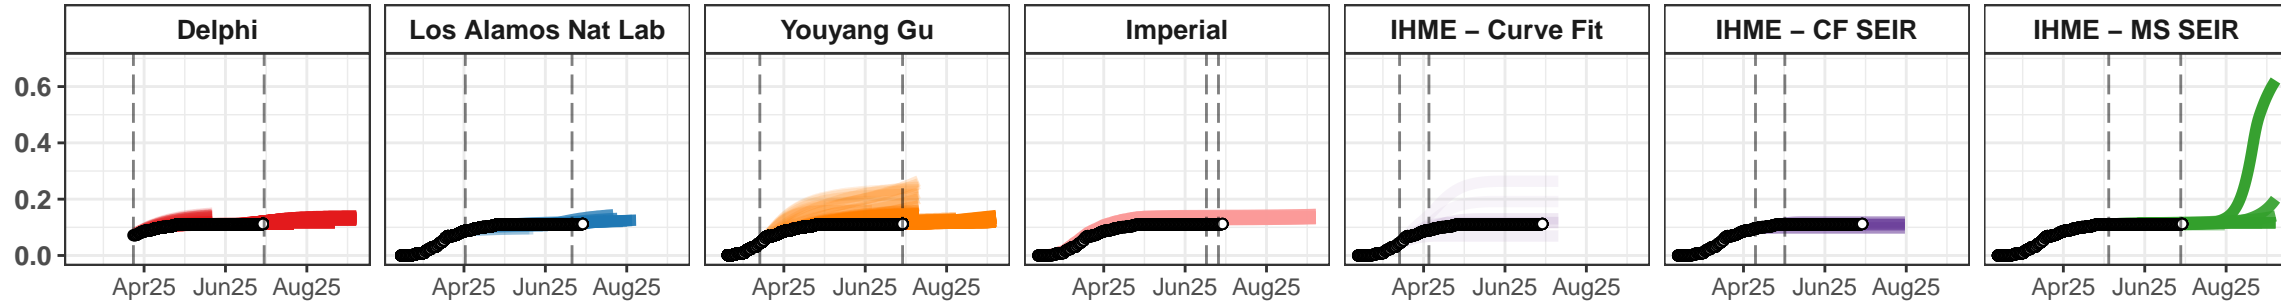

## All Cumulative Errors

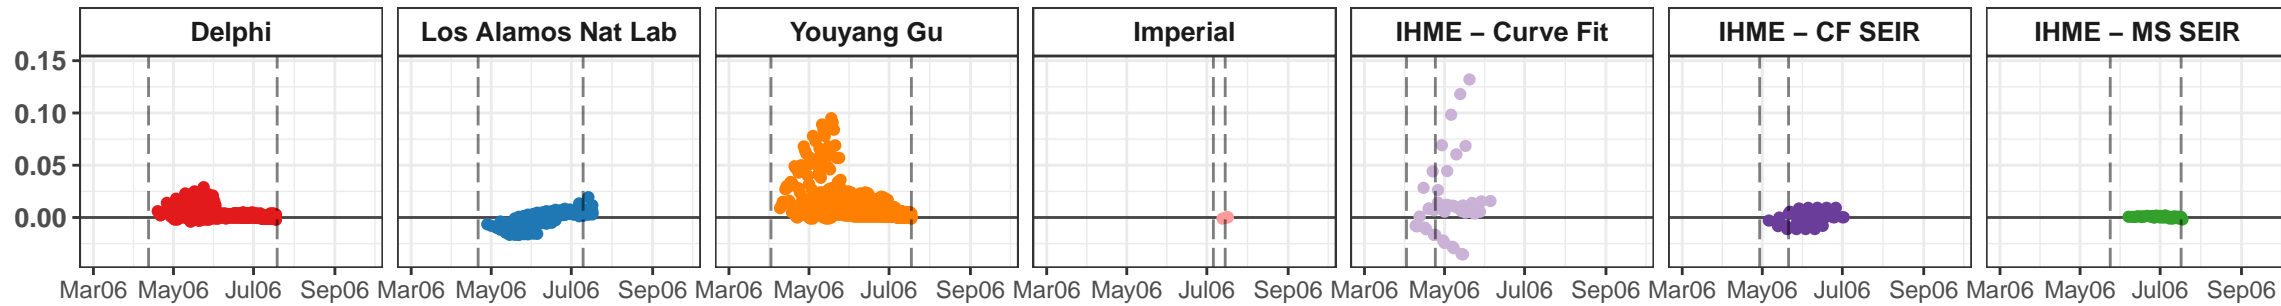

# Nicaragua

## Current Forecast

Delphi Los Alamos Nat Lab Imperial IHME – MS SEIR

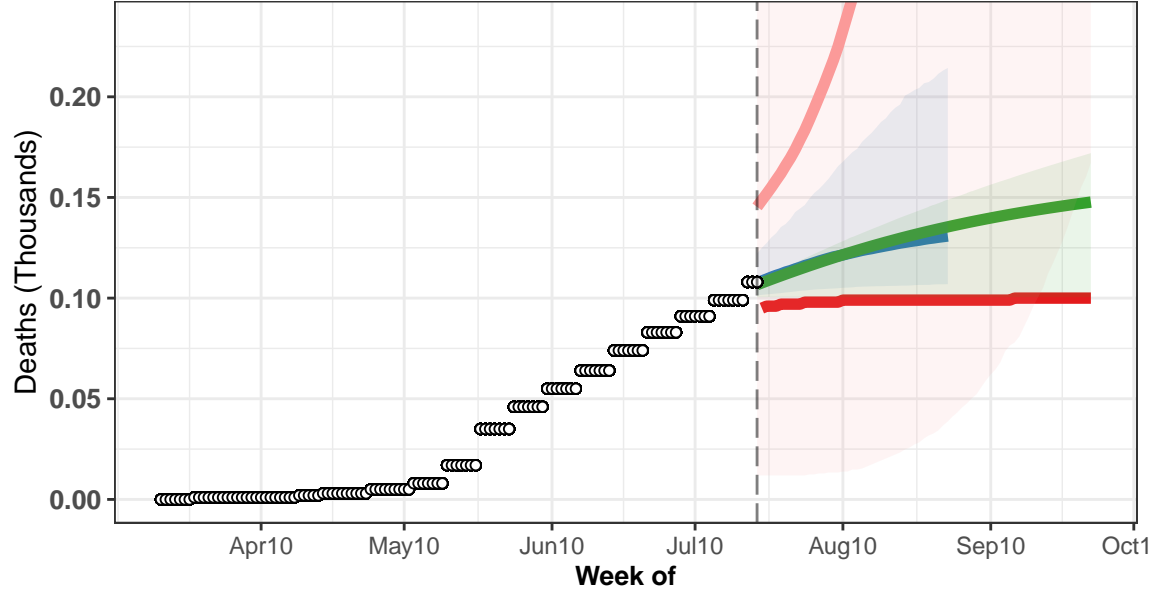

## Cumulative Out-Of-Sample Error (Post Intercept Shift)

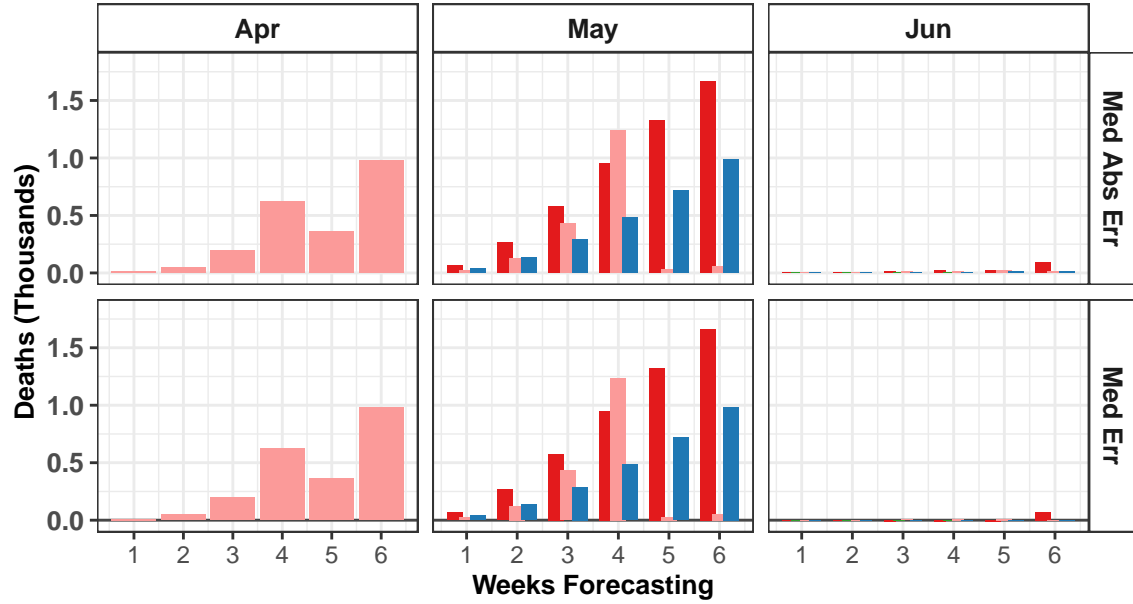

## All Model Versions

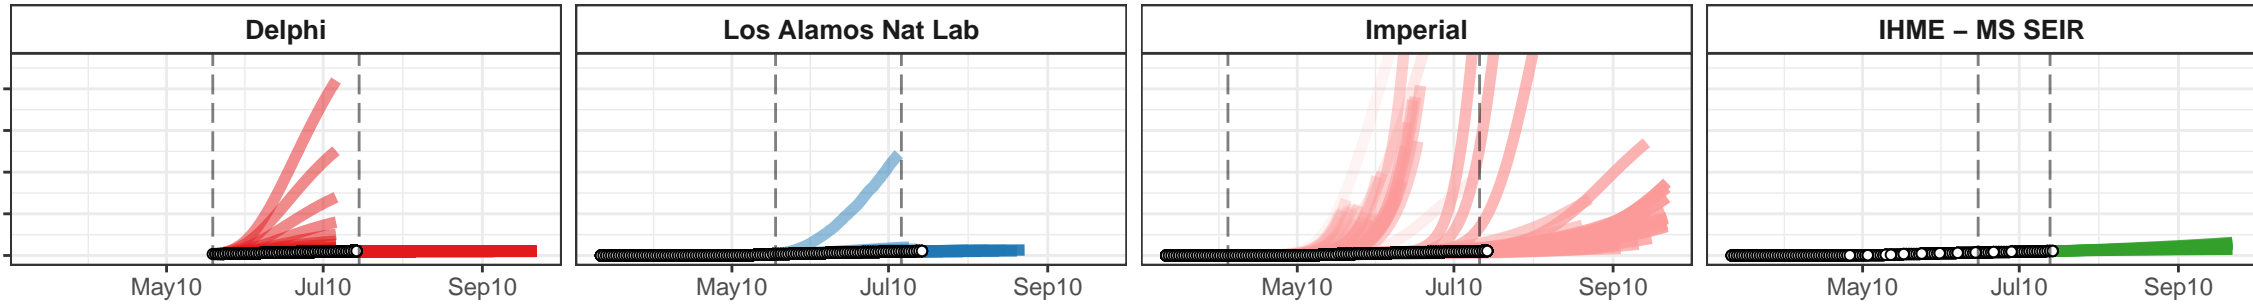

## All Cumulative Errors

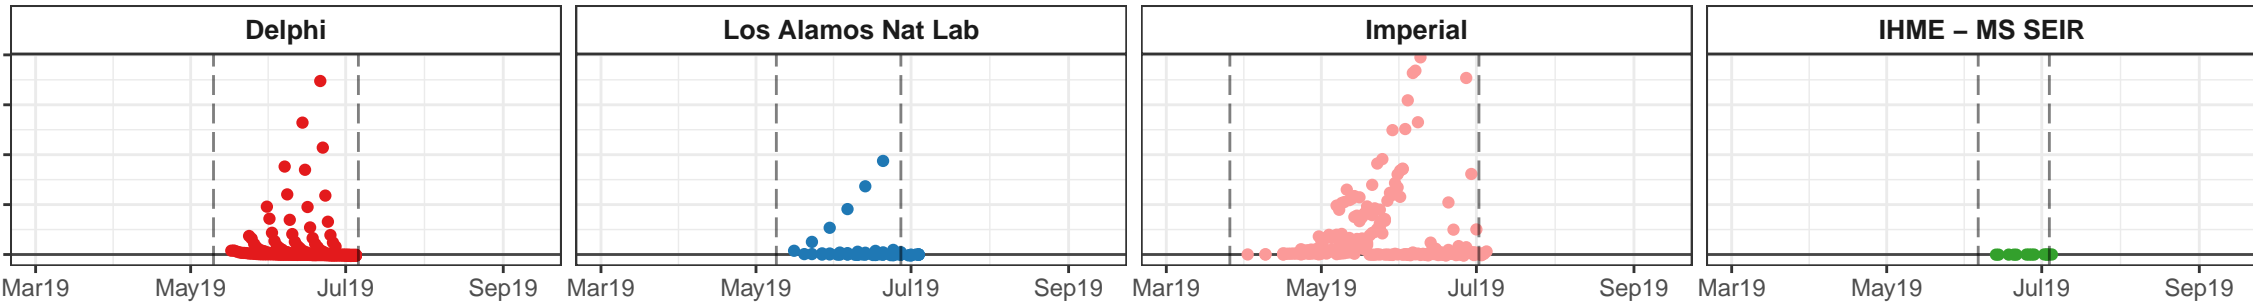

# Uzbekistan

## Current Forecast

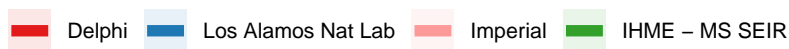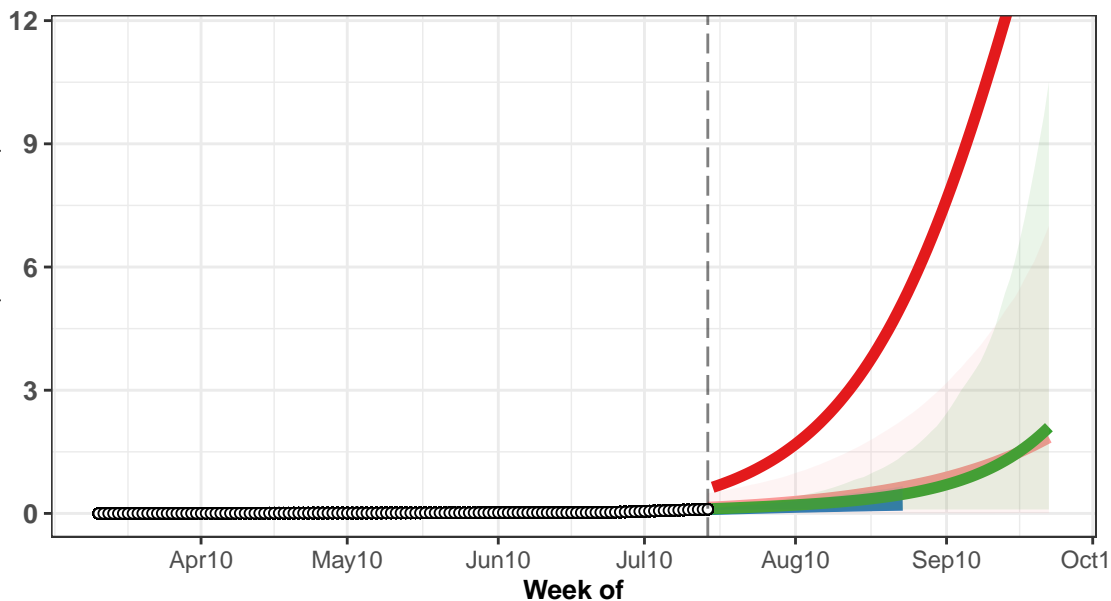

## Cumulative Out-Of-Sample Error (Post Intercept Shift)

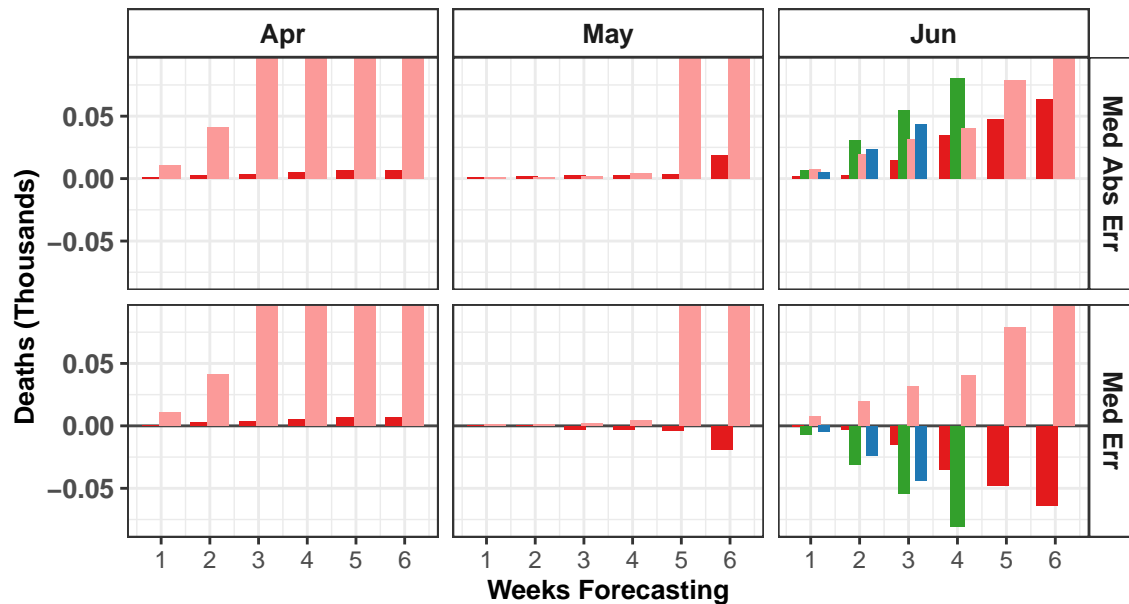

## All Model Versions

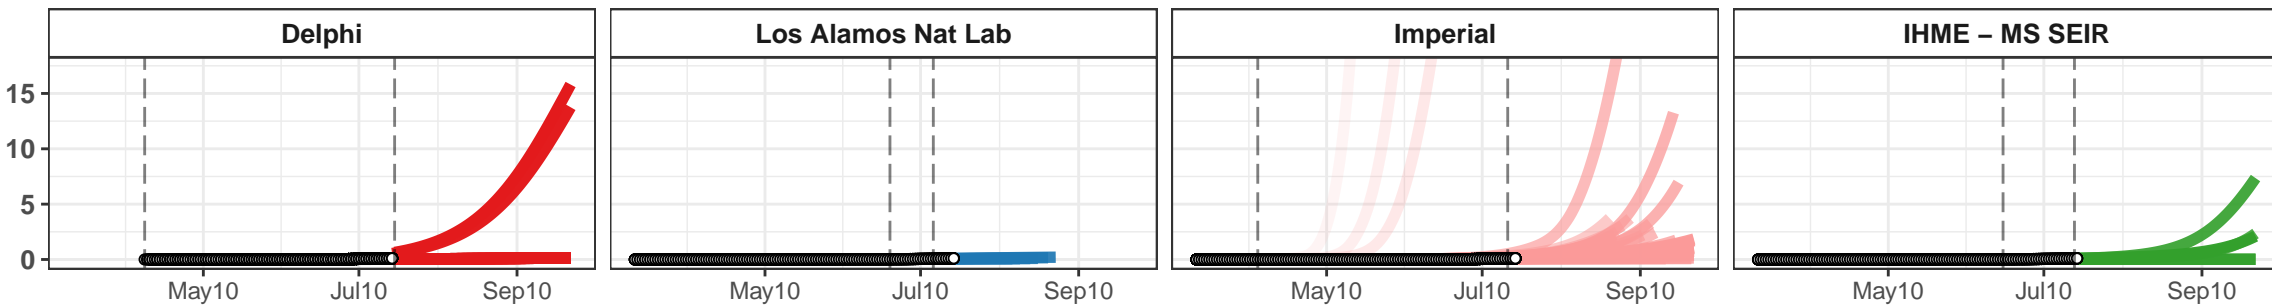

## All Cumulative Errors

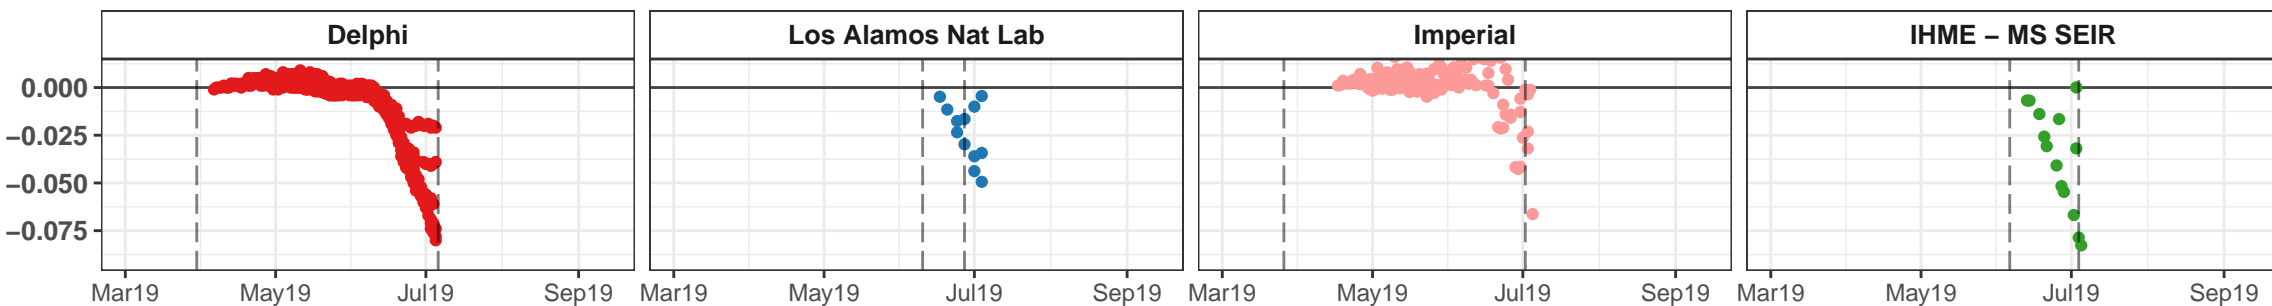

# West Virginia

## Current Forecast

Delphi Los Alamos Nat Lab Youyang Gu IHME - MS SEIR ○ JHU △ NYT

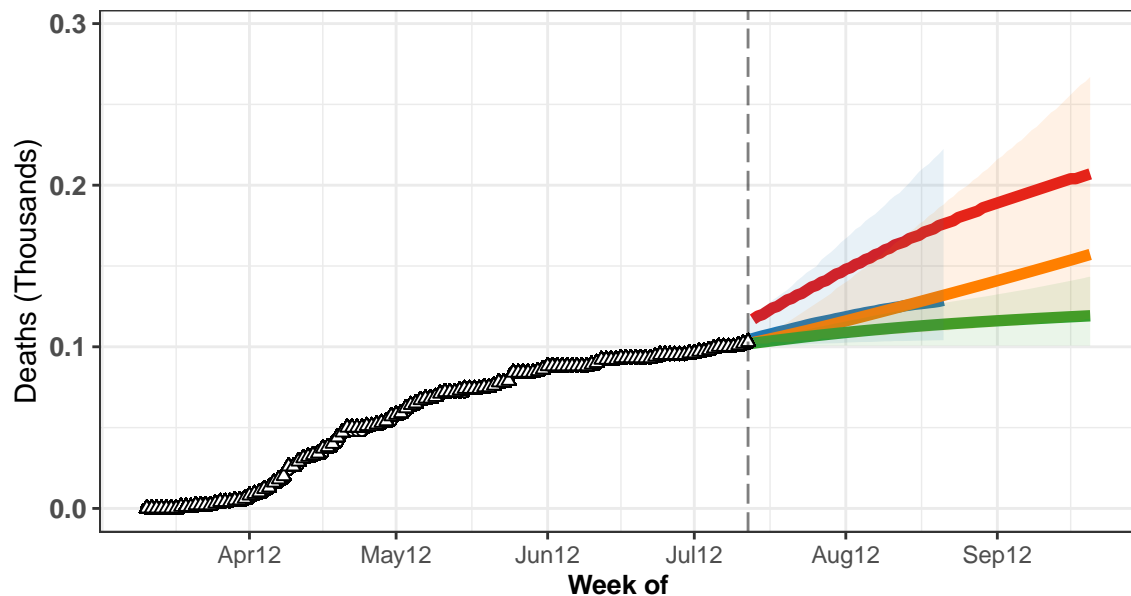

## Cumulative Out-Of-Sample Error (Post Intercept Shift)

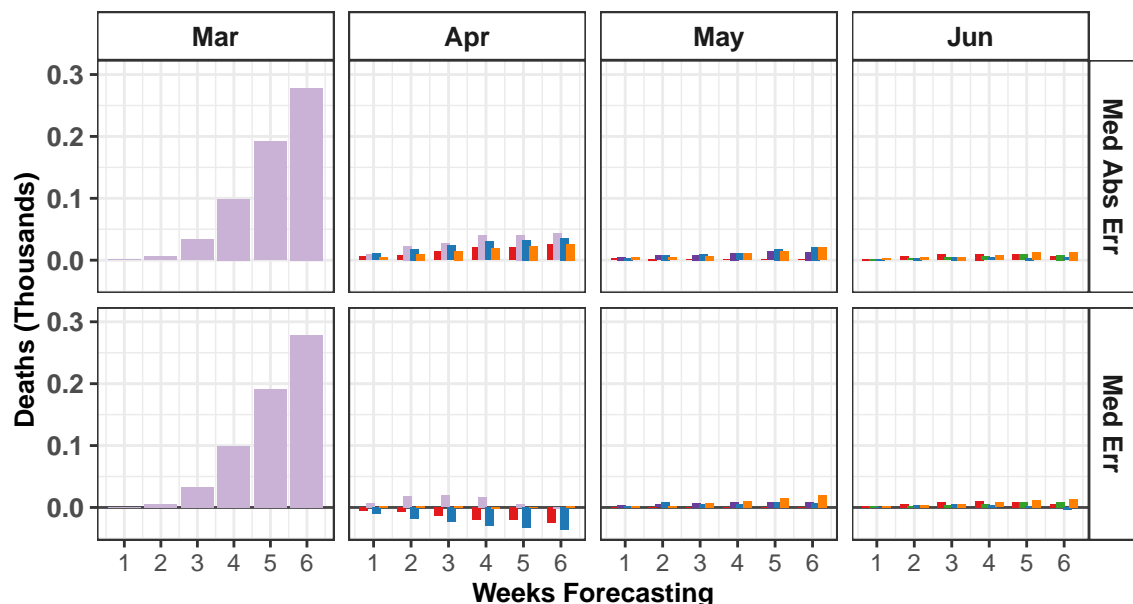

## All Model Versions

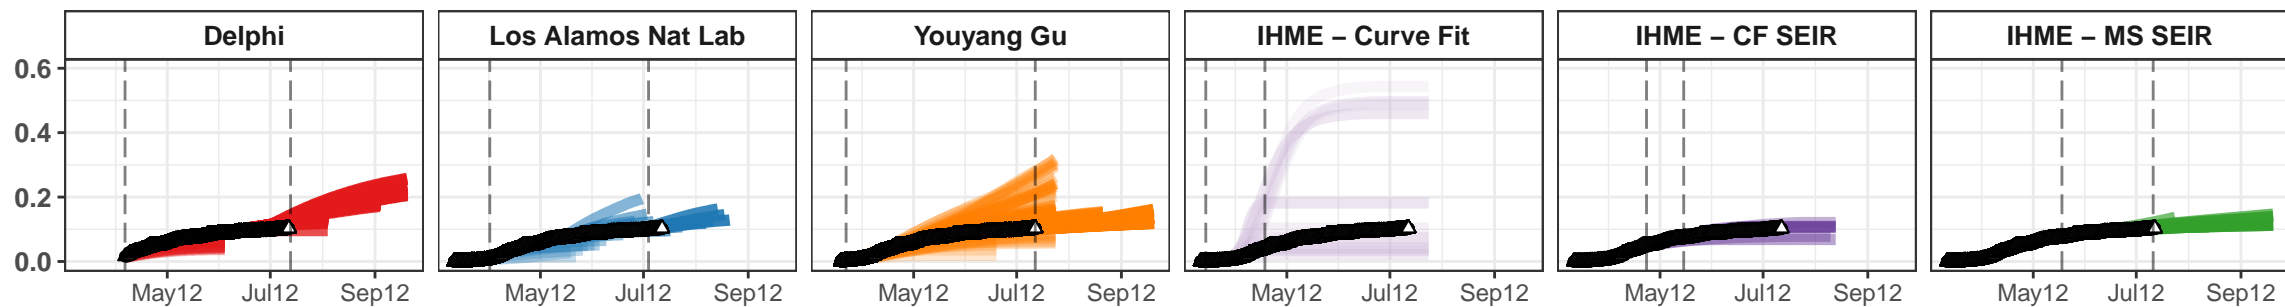

## All Cumulative Errors

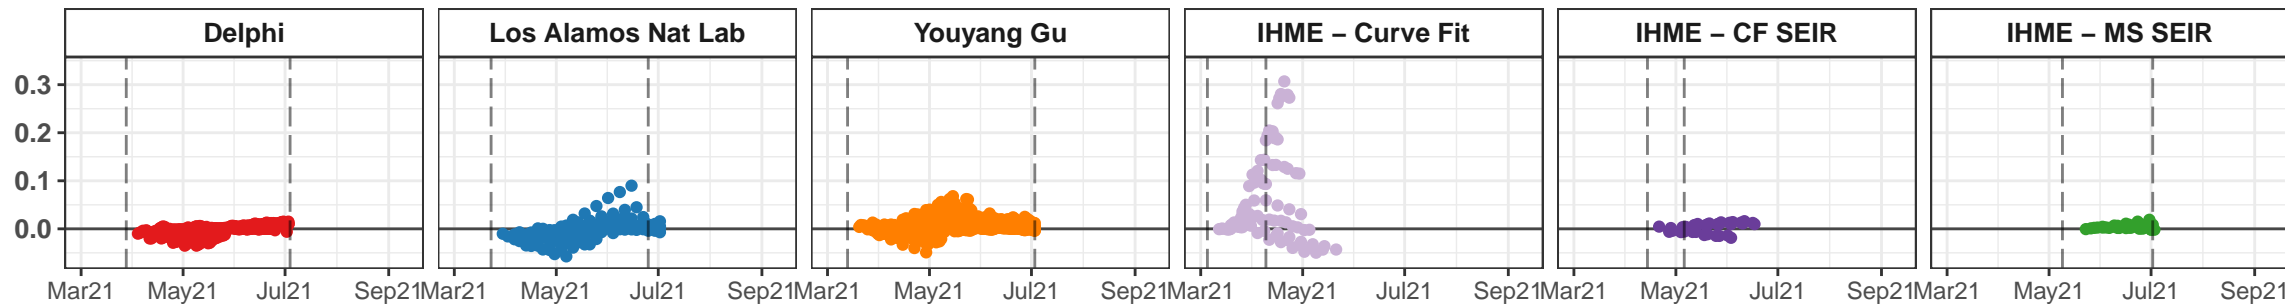

# North Dakota

## Current Forecast

█ Delphi 
 █ Los Alamos Nat Lab 
 █ Youyang Gu 
 █ IHME – MS SEIR 
 ○ JHU 
 △ NYT

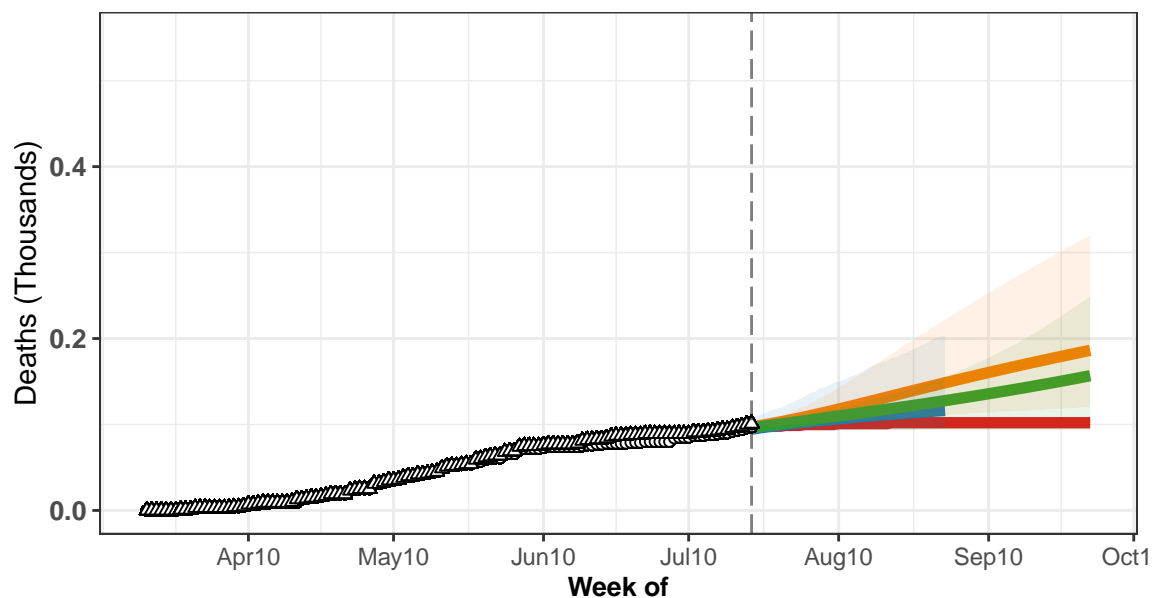

## Cumulative Out-Of-Sample Error (Post Intercept Shift)

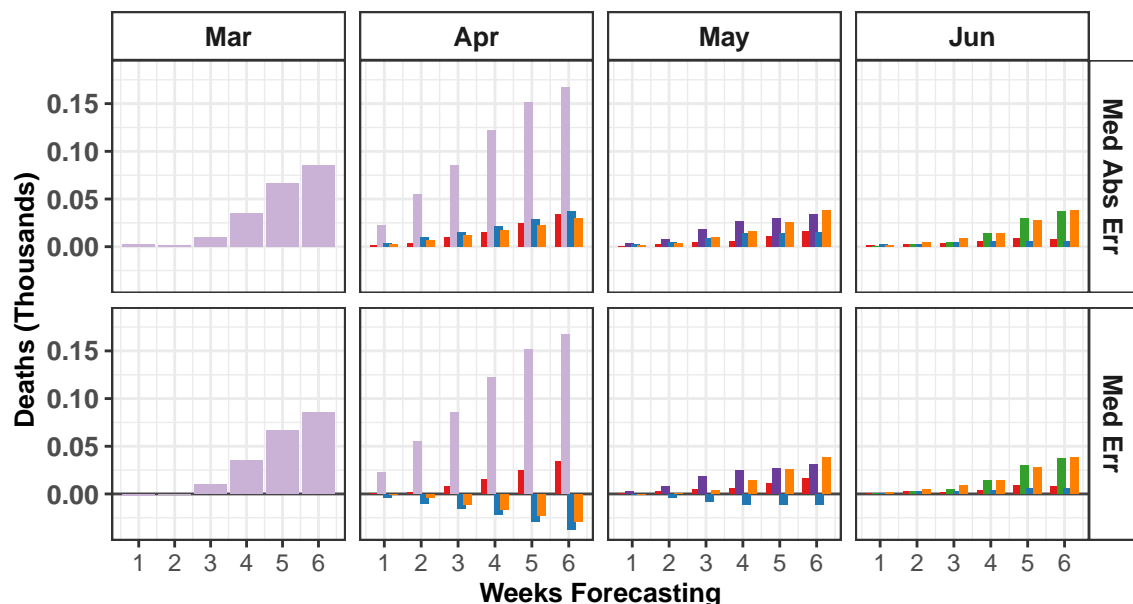

## All Model Versions

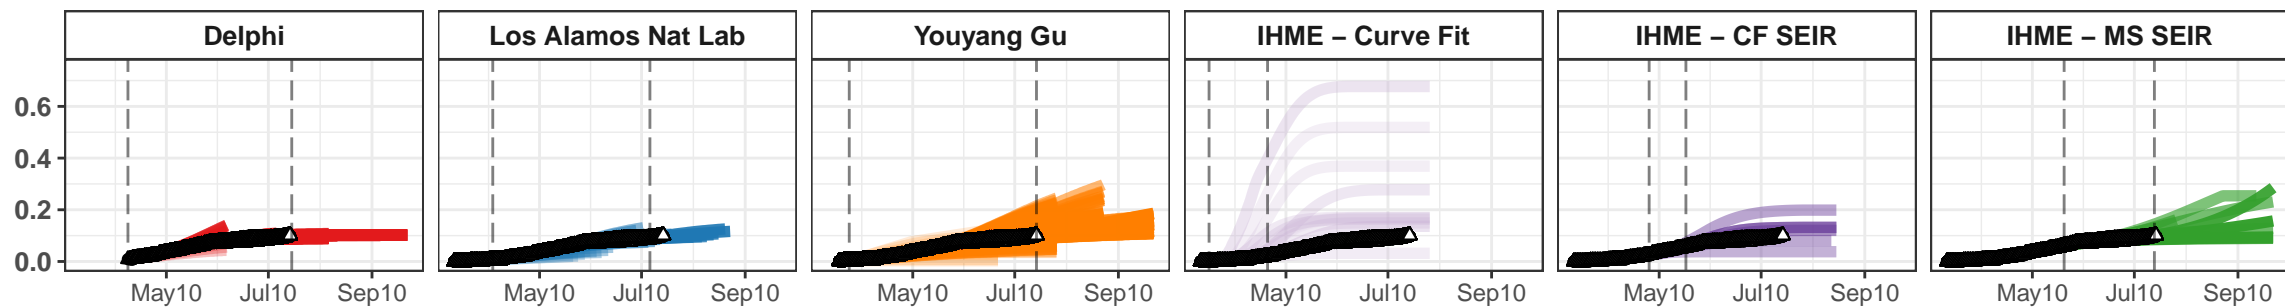

## All Cumulative Errors

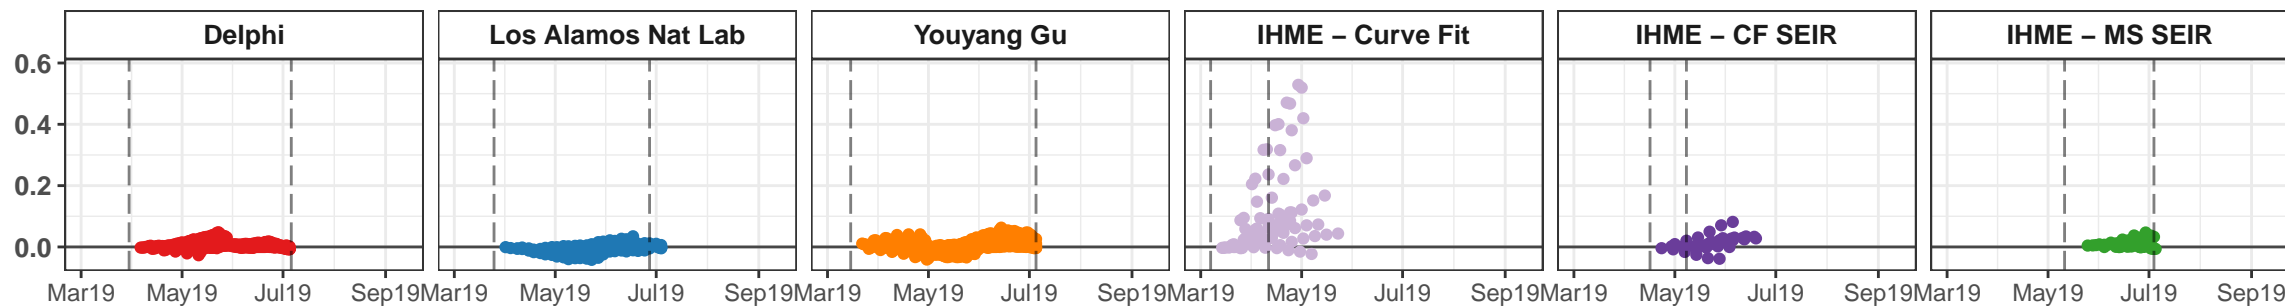

# Cote d'Ivoire

## Current Forecast

Delphi Los Alamos Nat Lab Imperial IHME – MS SEIR

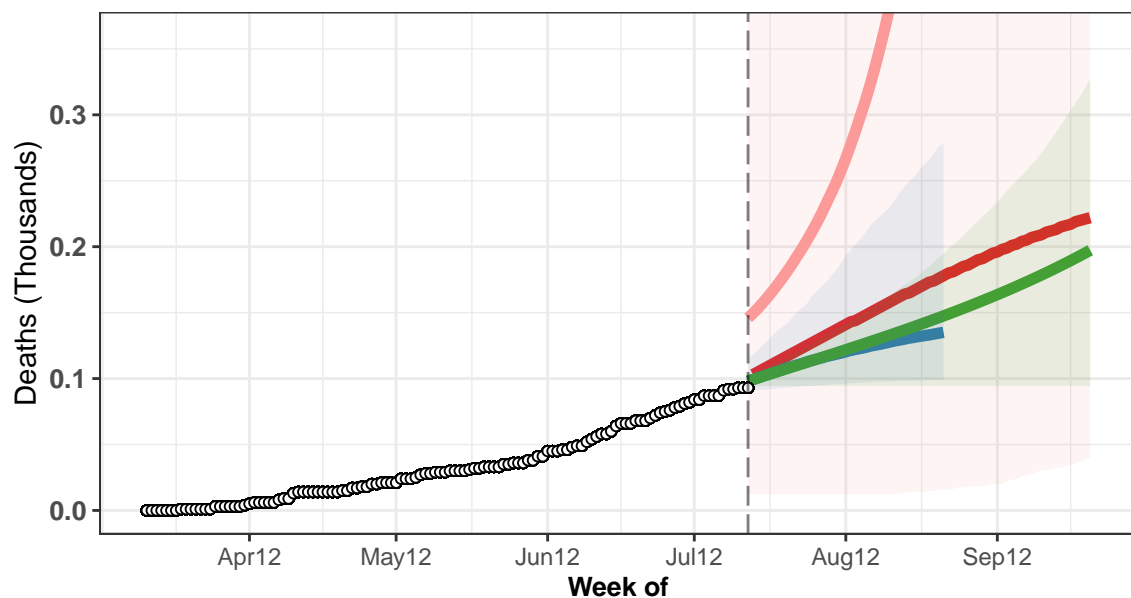

## Cumulative Out-Of-Sample Error (Post Intercept Shift)

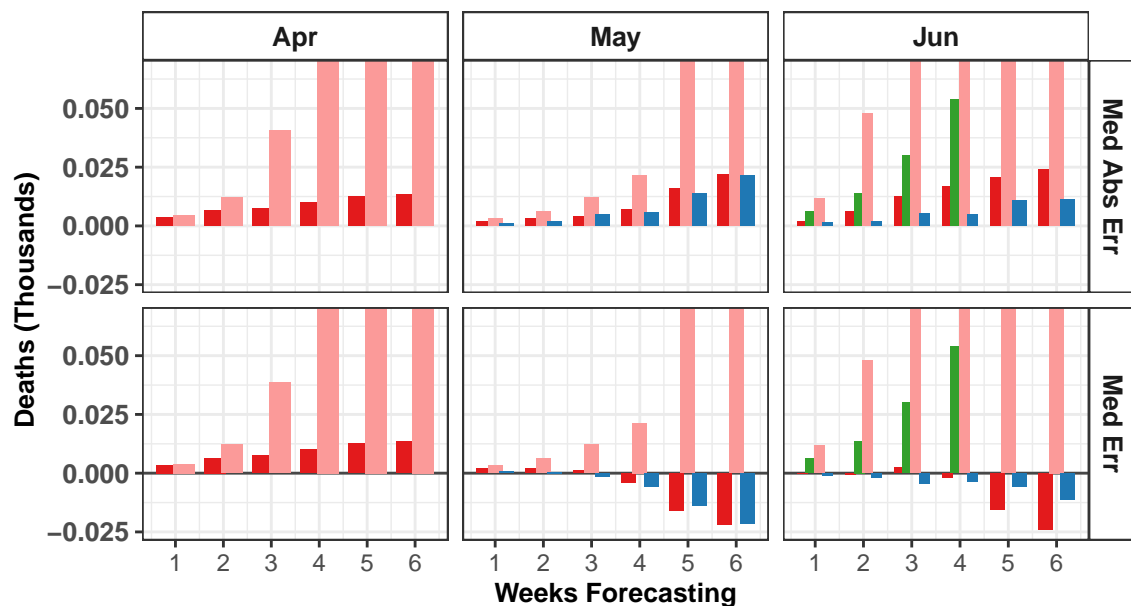

## All Model Versions

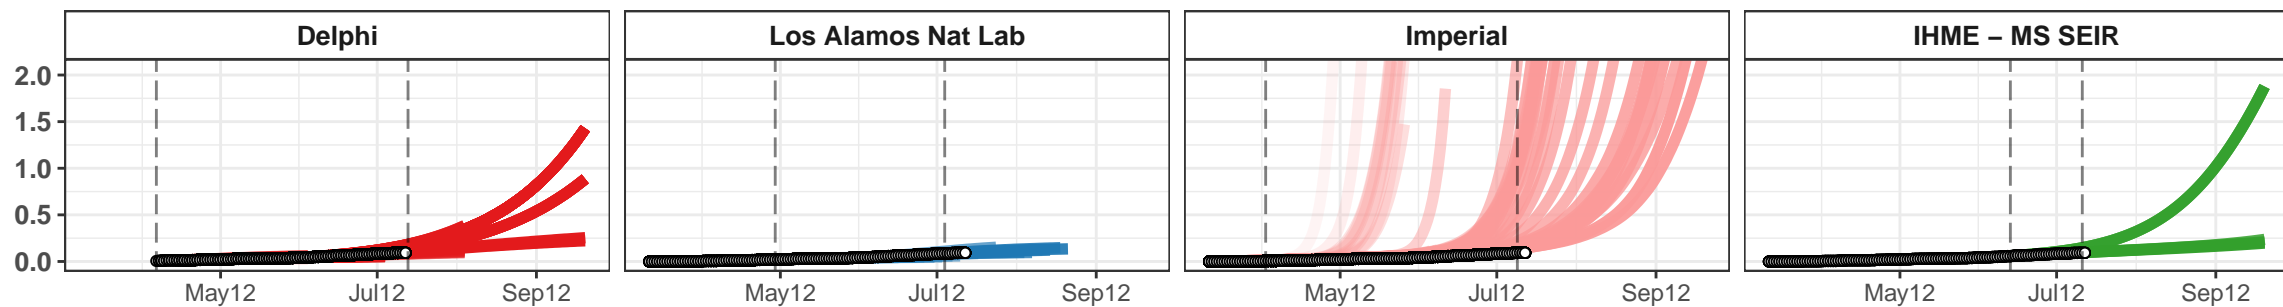

## All Cumulative Errors

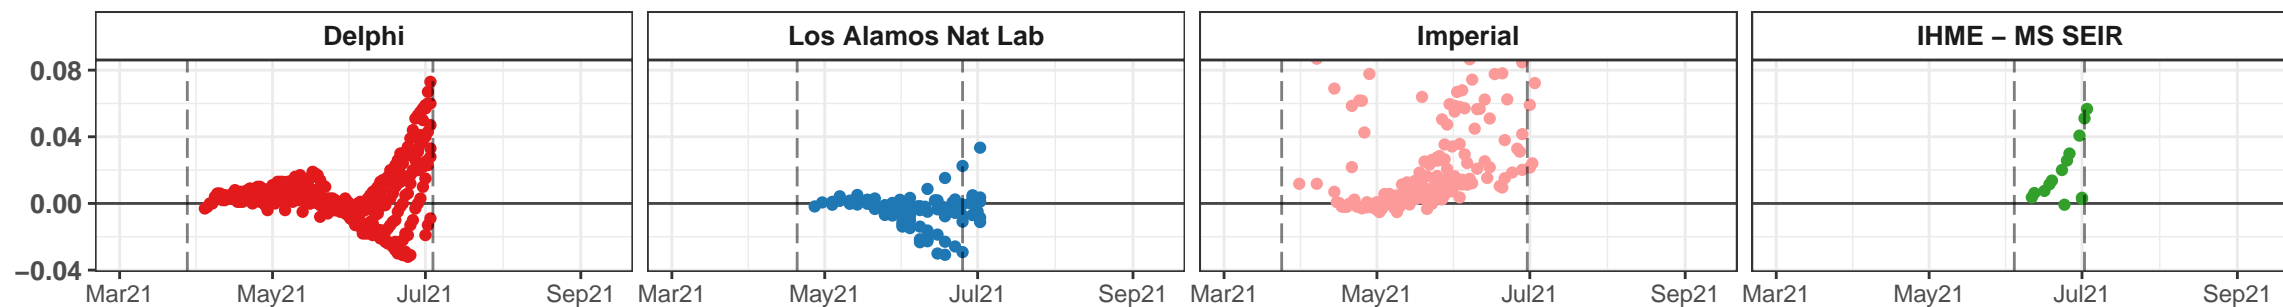

# Somalia

## Current Forecast

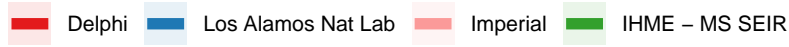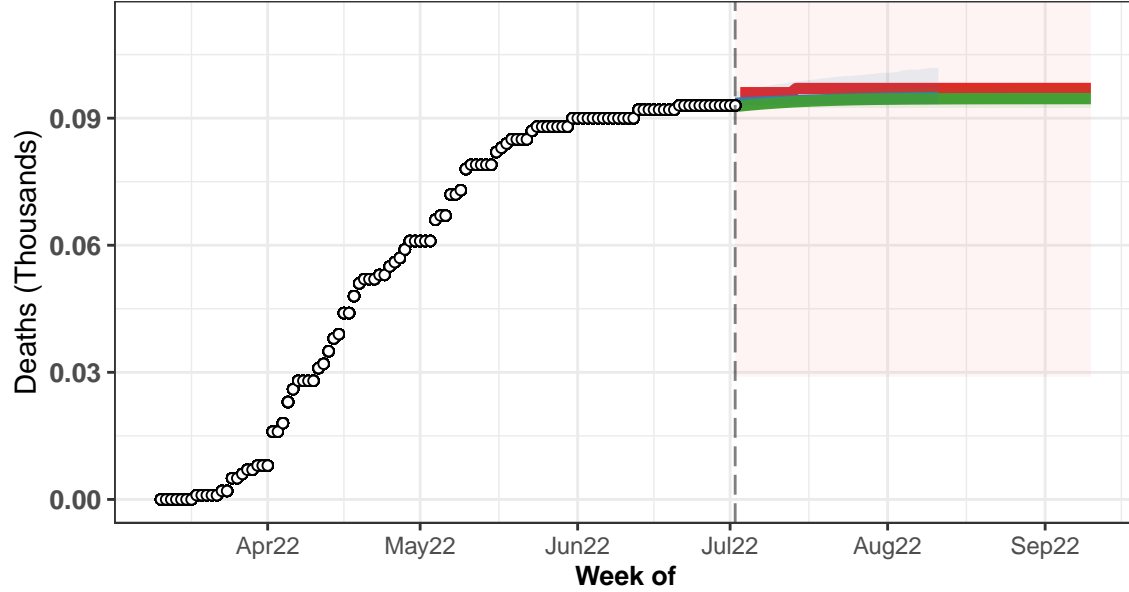

## Cumulative Out-Of-Sample Error (Post Intercept Shift)

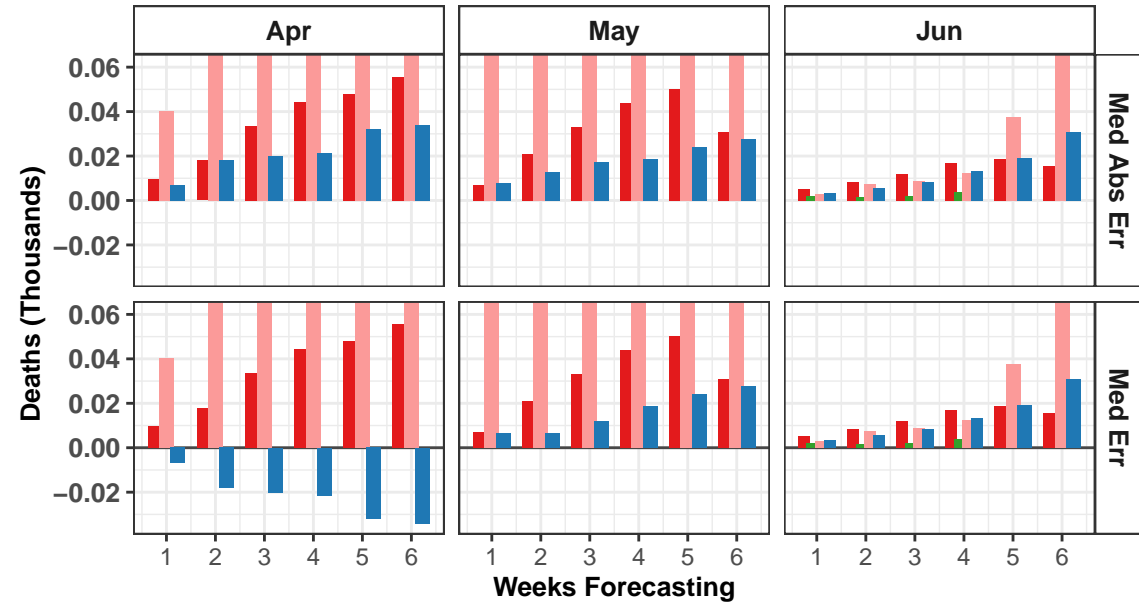

## All Model Versions

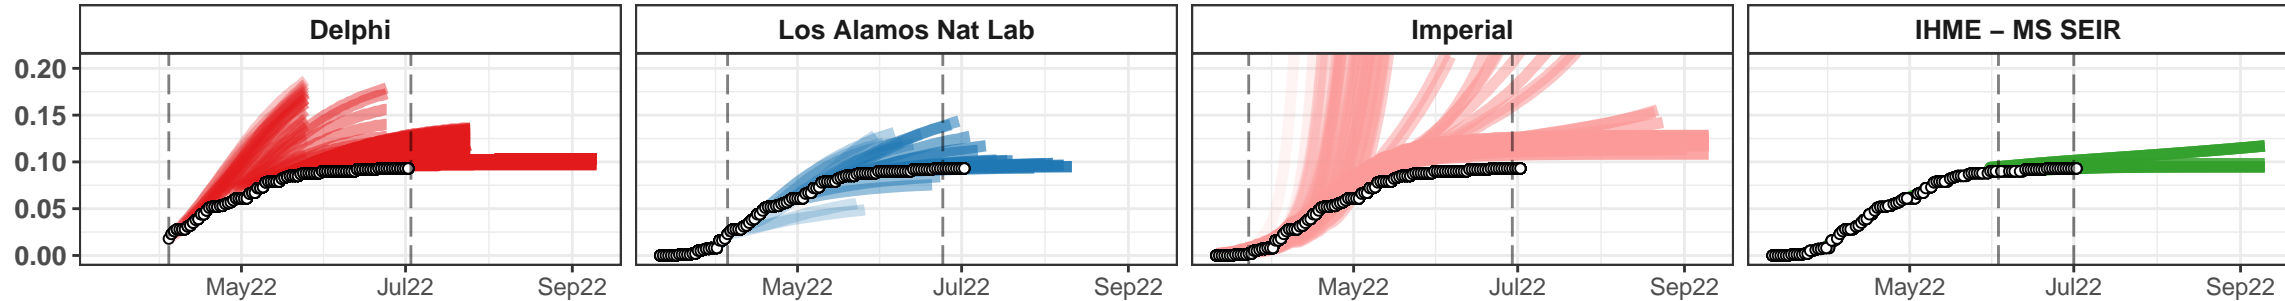

## All Cumulative Errors

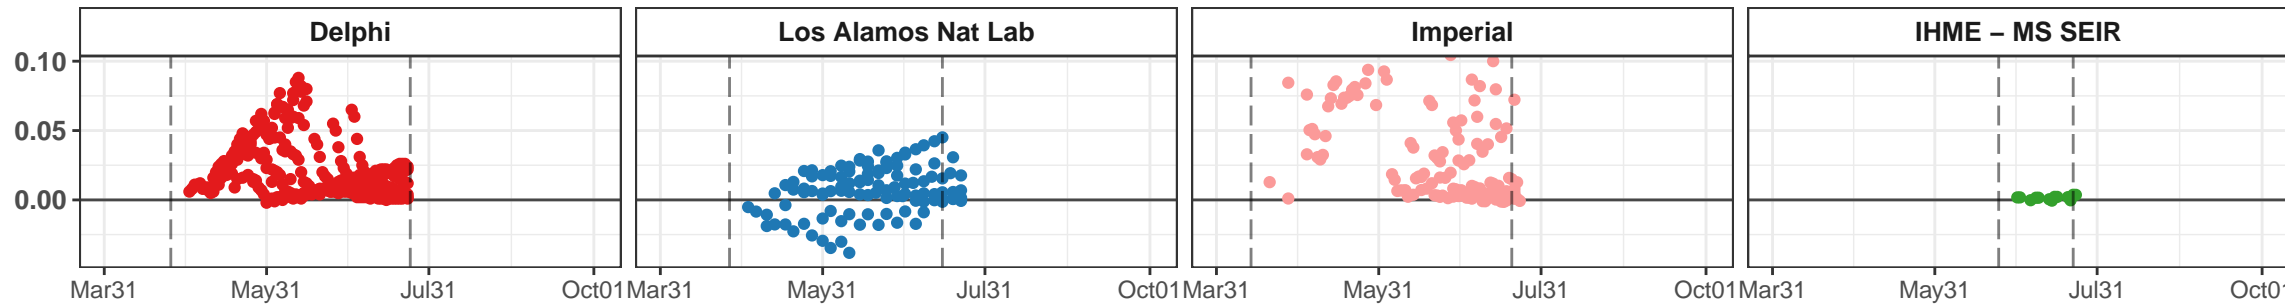

# Cuba

## Current Forecast

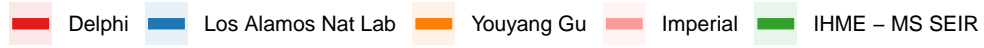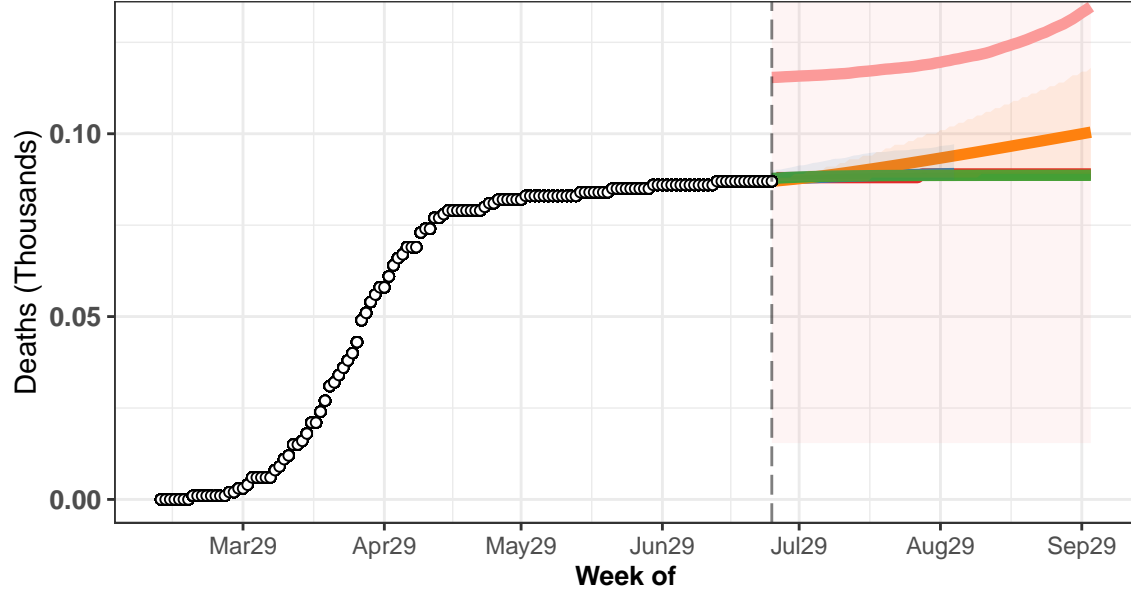

## Cumulative Out-Of-Sample Error (Post Intercept Shift)

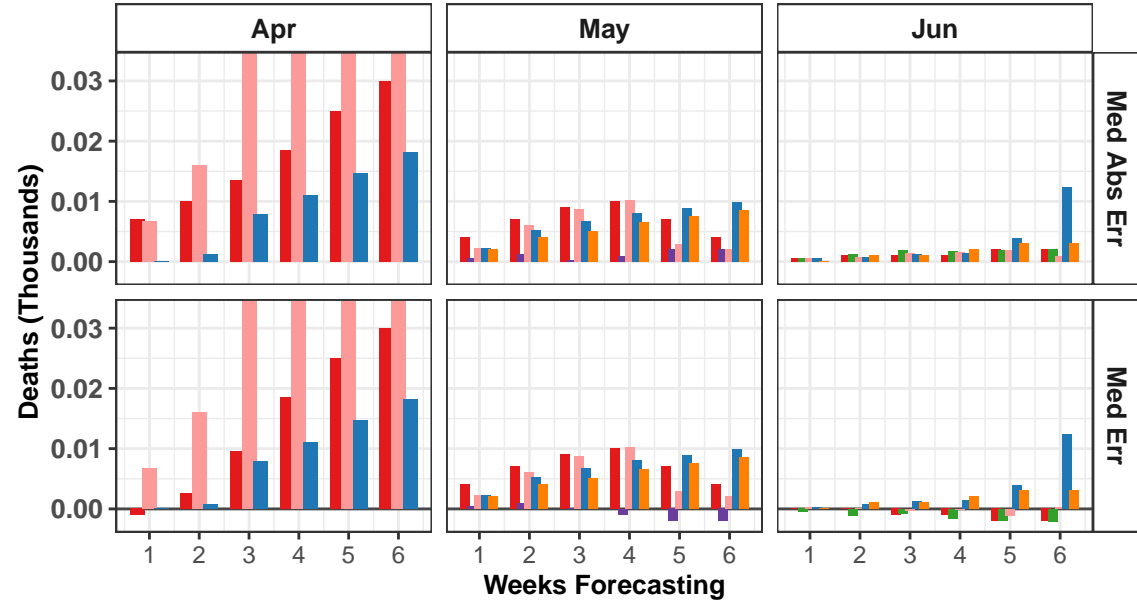

## All Model Versions

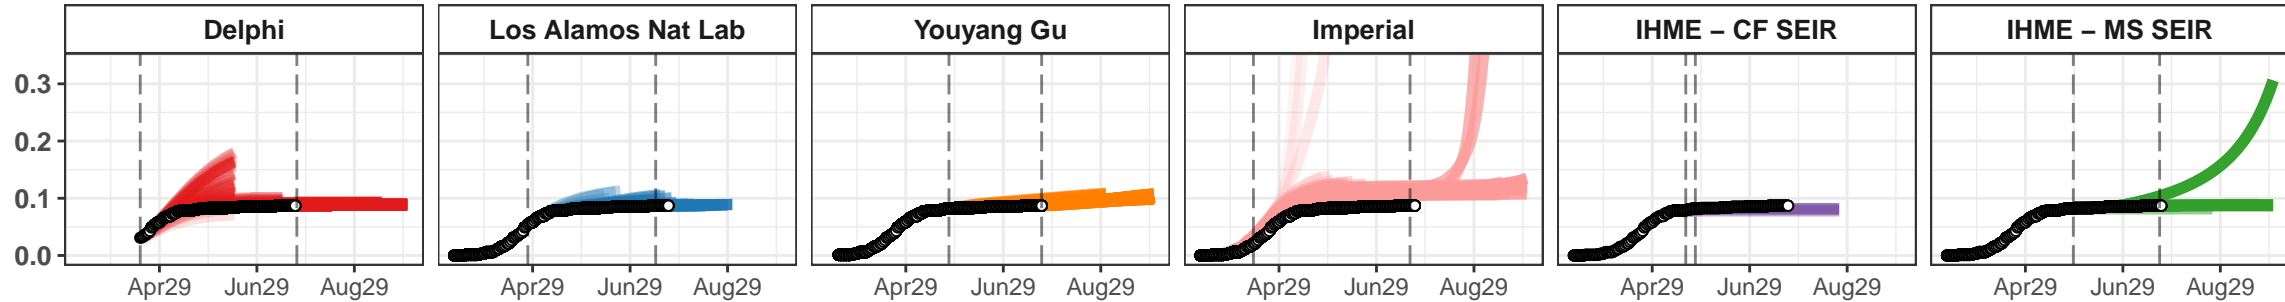

## All Cumulative Errors

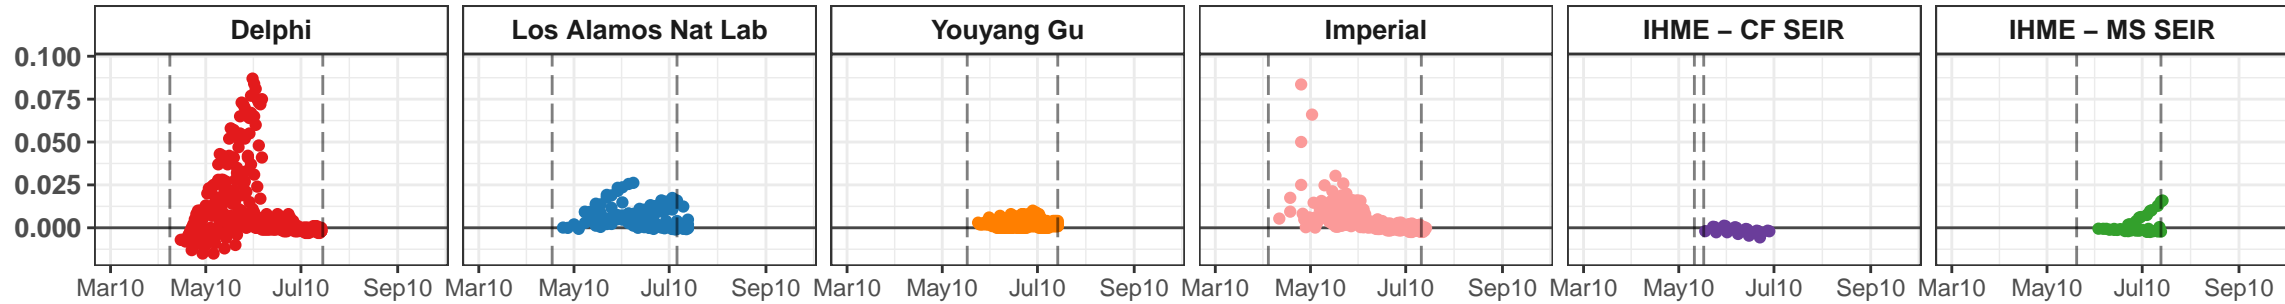



# Costa Rica

## Current Forecast

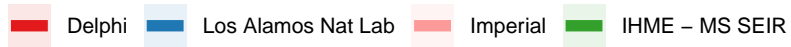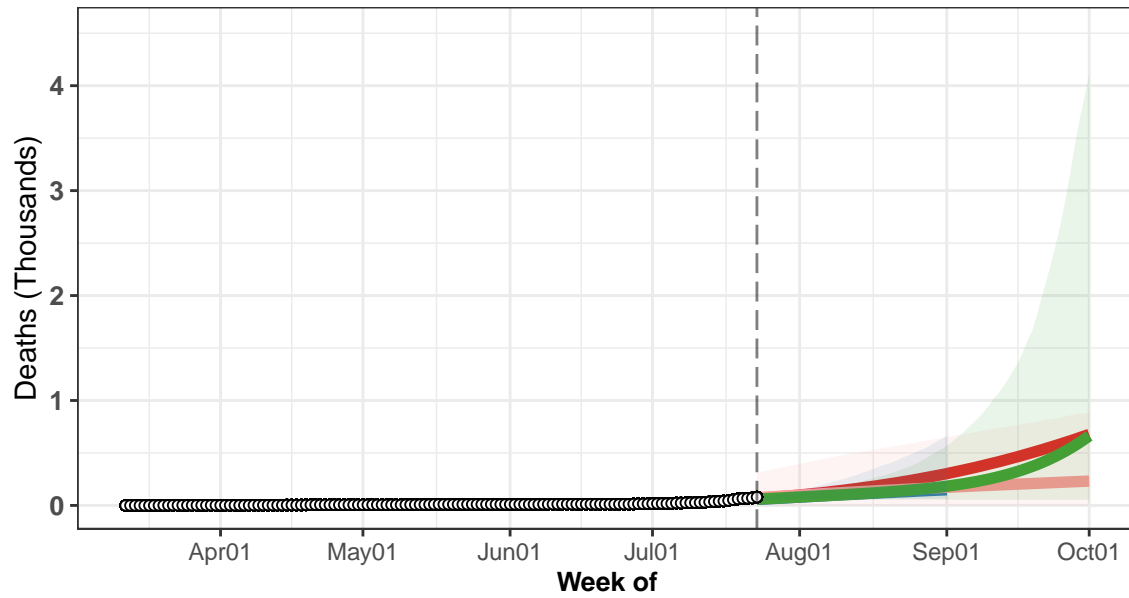

## Cumulative Out-Of-Sample Error (Post Intercept Shift)

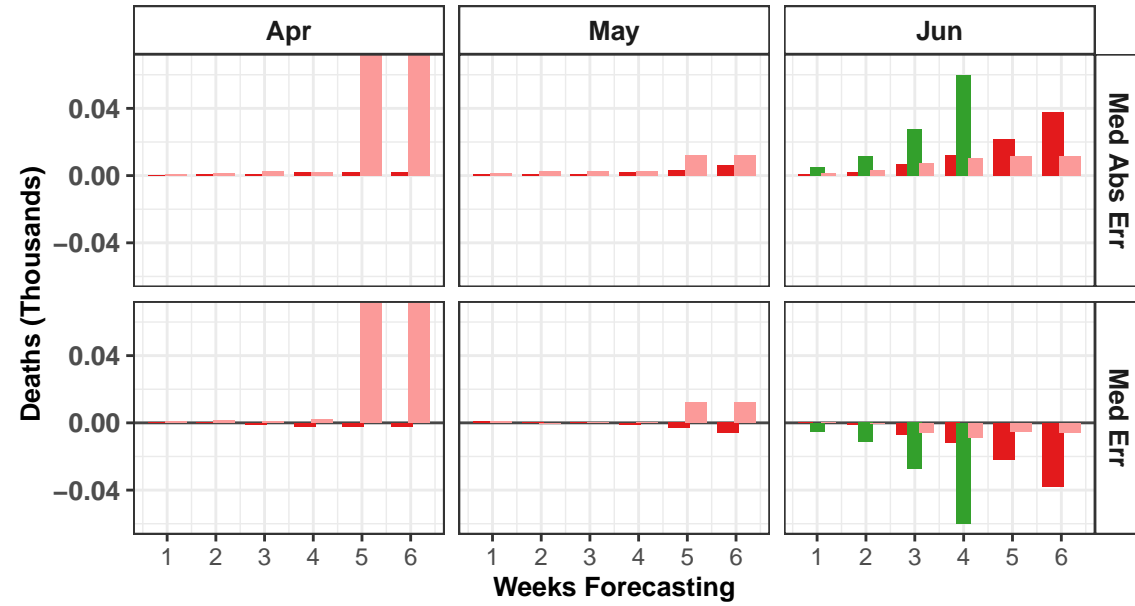

## All Model Versions

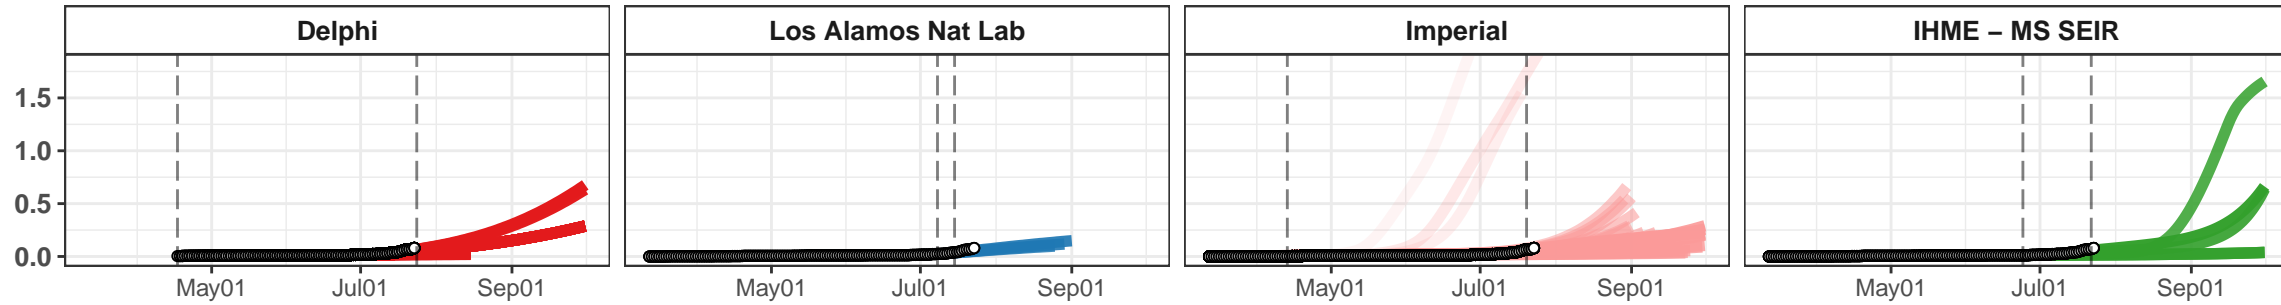

## All Cumulative Errors

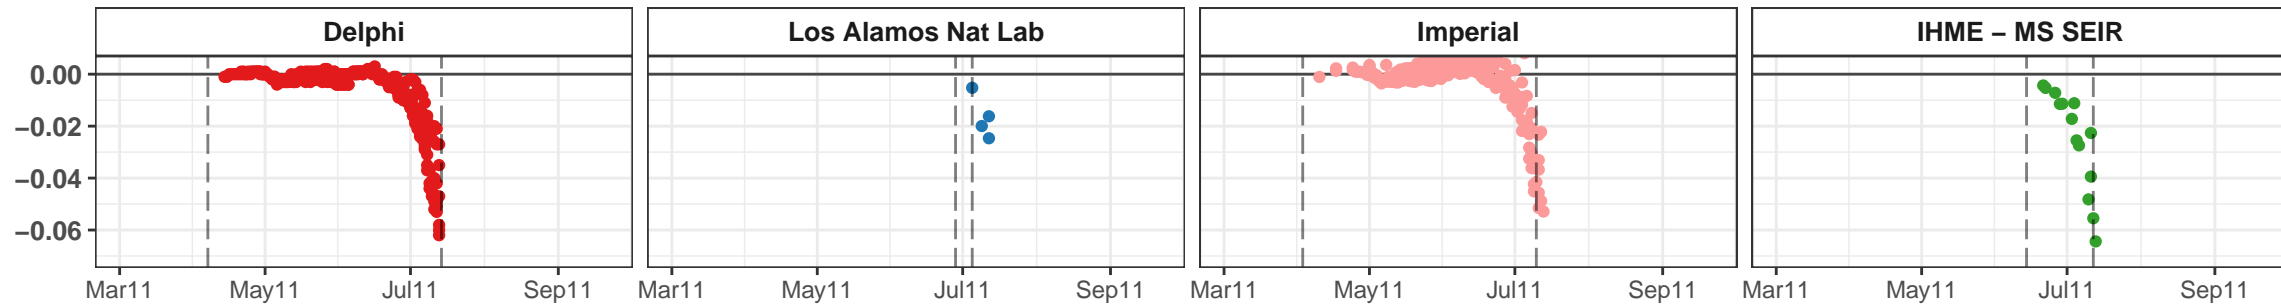

# Lithuania

## Current Forecast

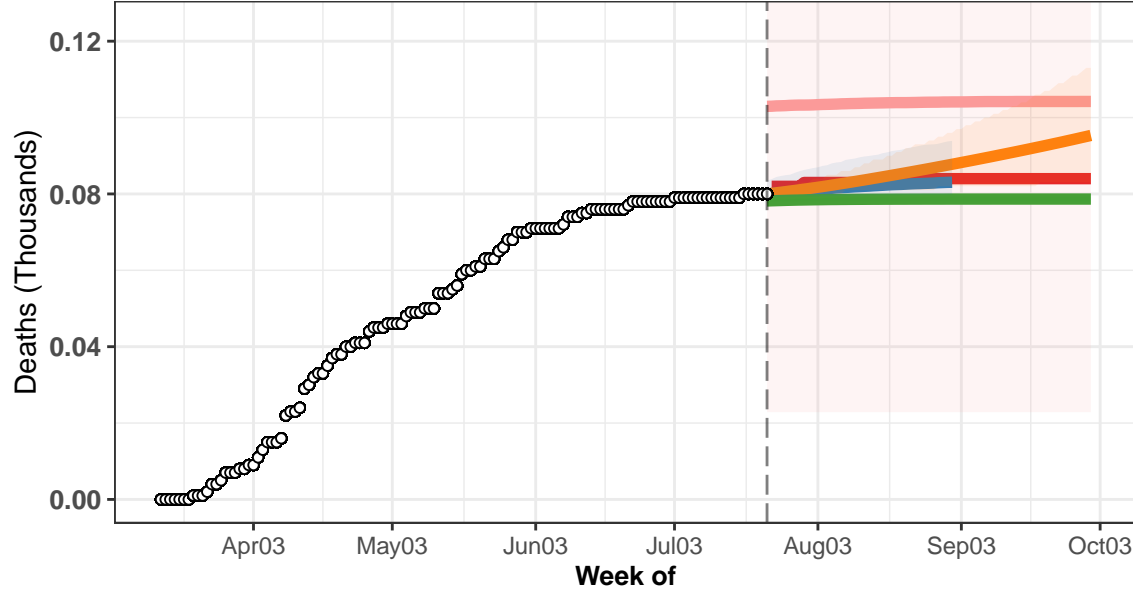

## Cumulative Out-Of-Sample Error (Post Intercept Shift)

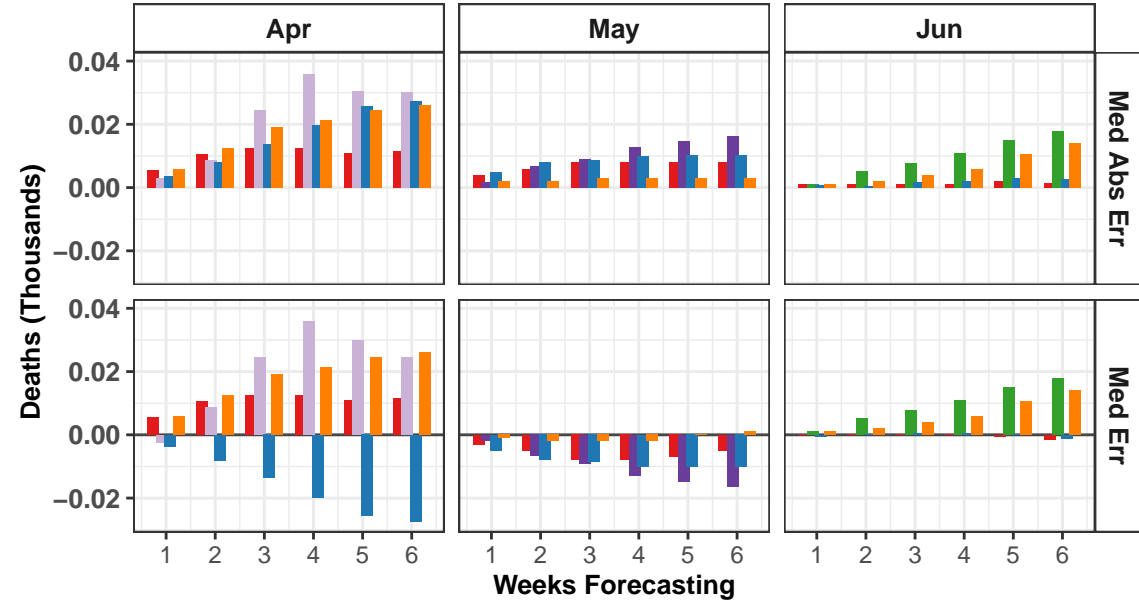

## All Model Versions

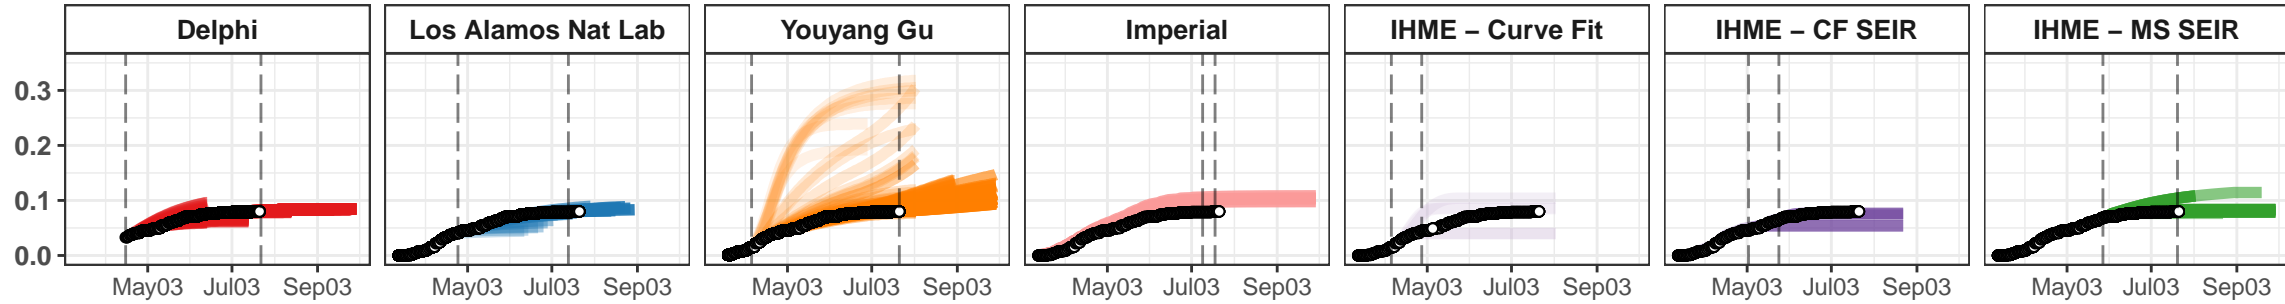

## All Cumulative Errors

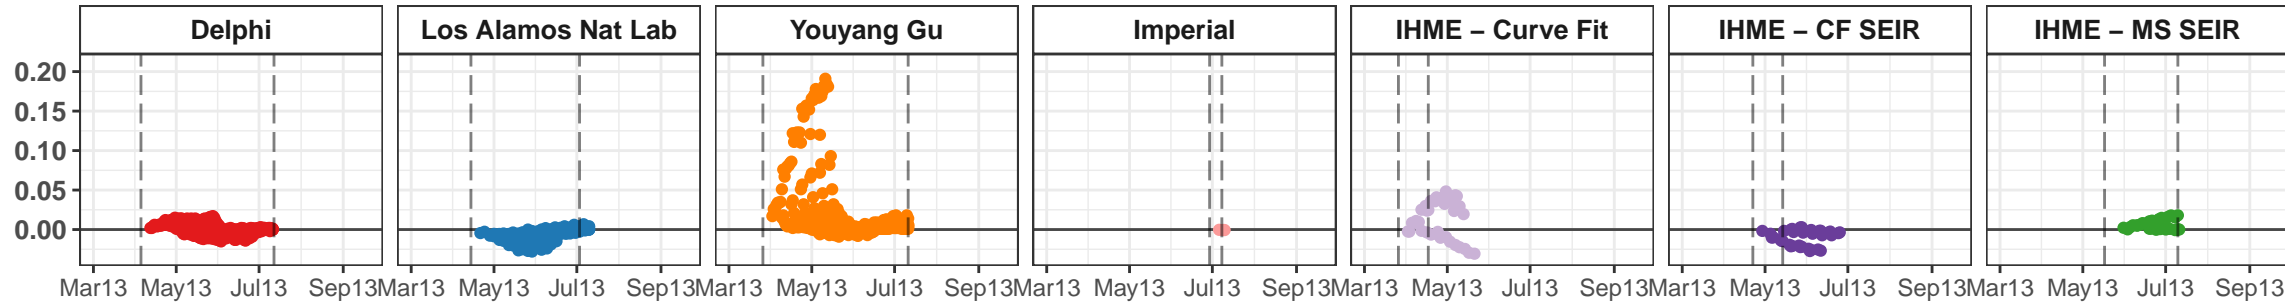

# Malawi

## Current Forecast

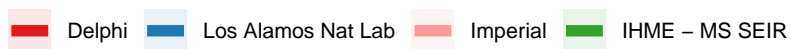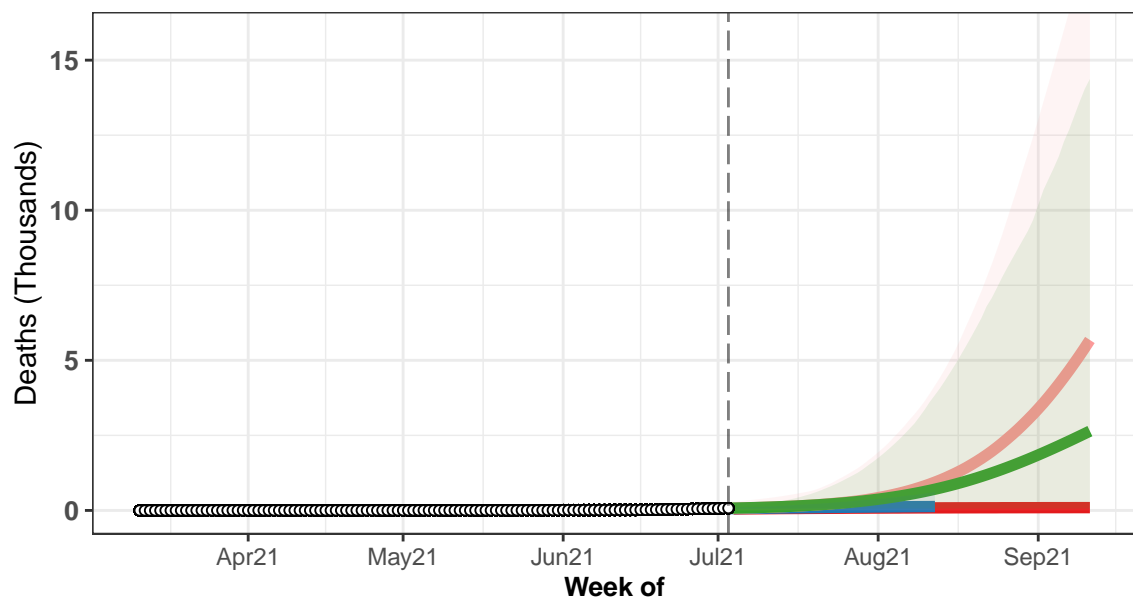

## Cumulative Out-Of-Sample Error (Post Intercept Shift)

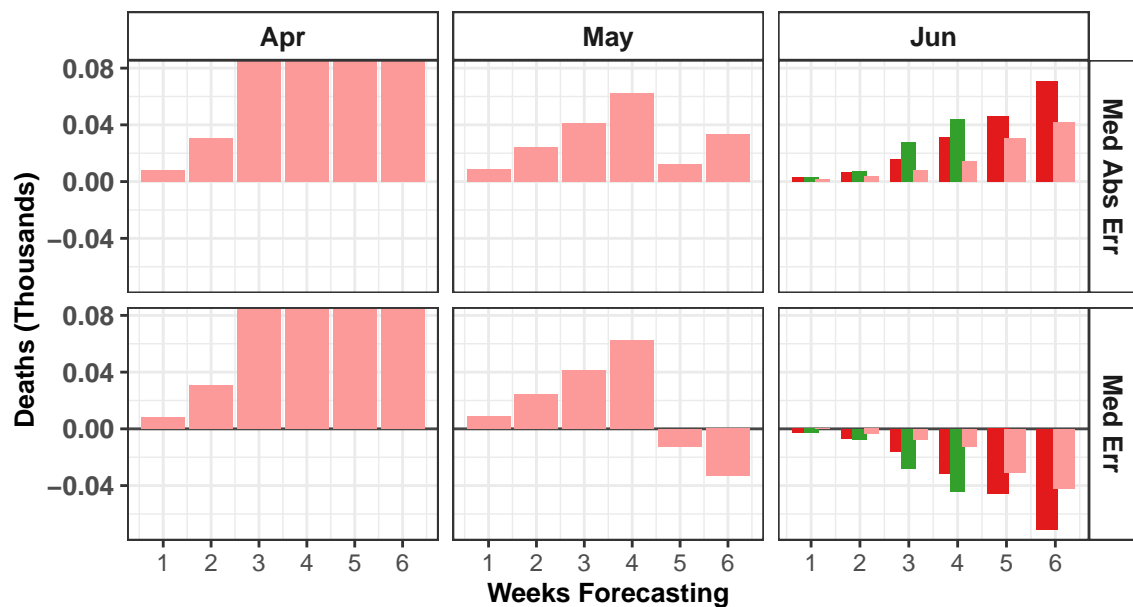

## All Model Versions

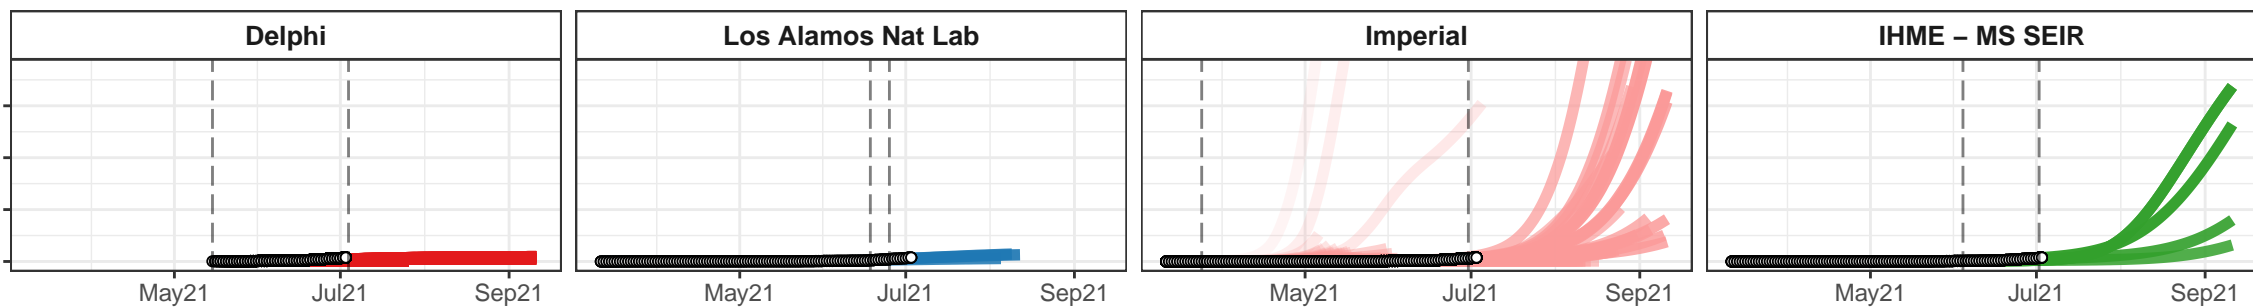

## All Cumulative Errors

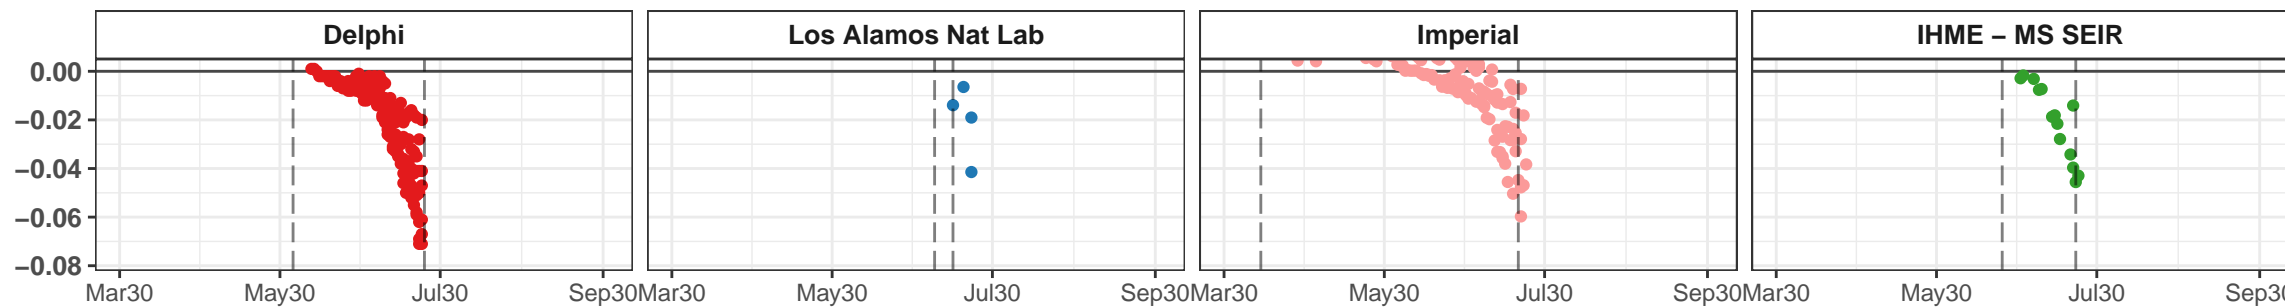

# Chad

## Current Forecast

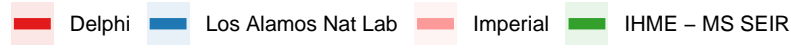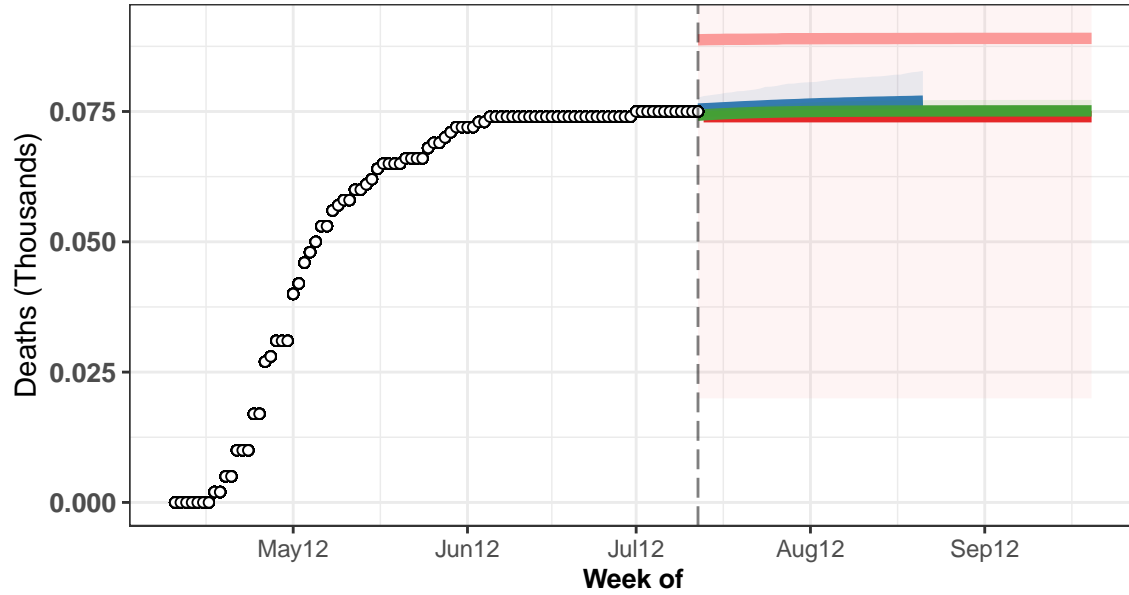

## Cumulative Out-Of-Sample Error (Post Intercept Shift)

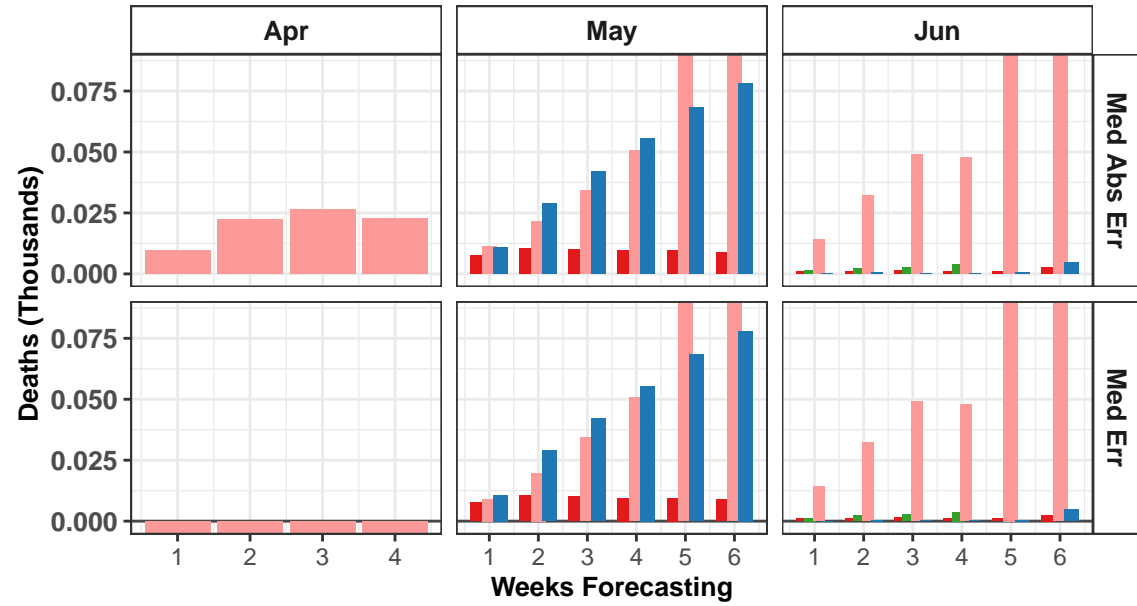

## All Model Versions

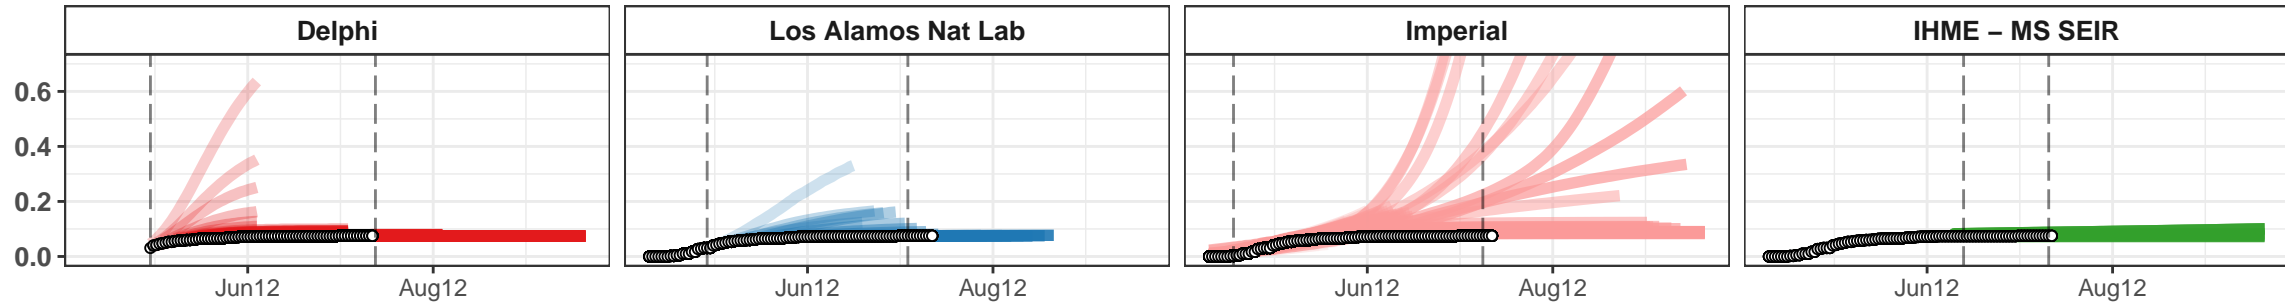

## All Cumulative Errors

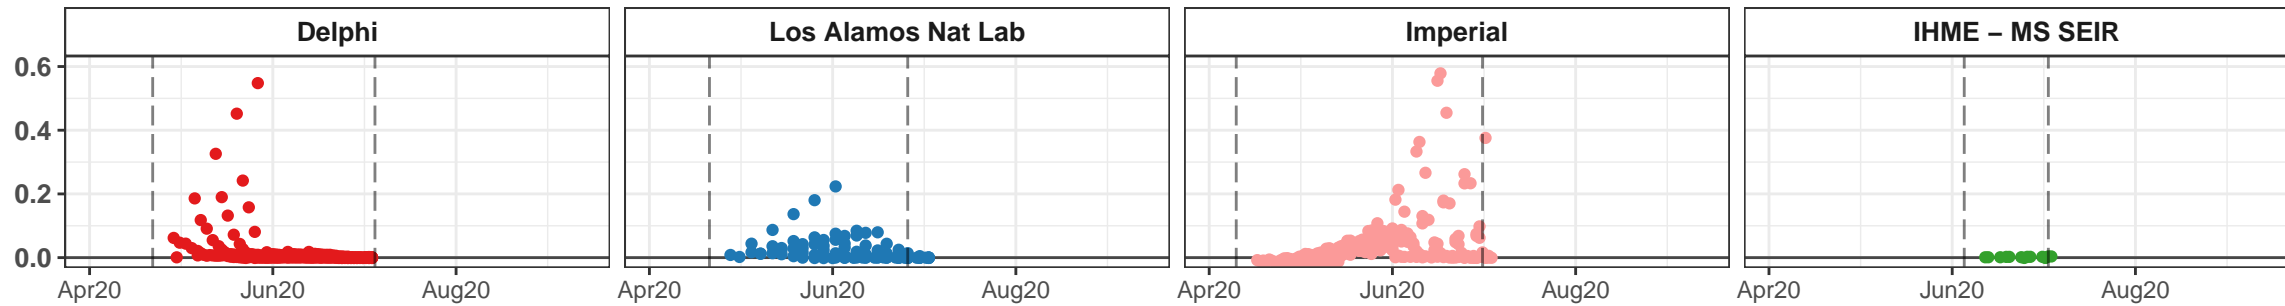

# Liberia

## Current Forecast

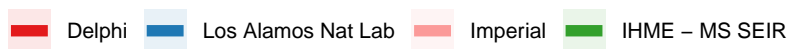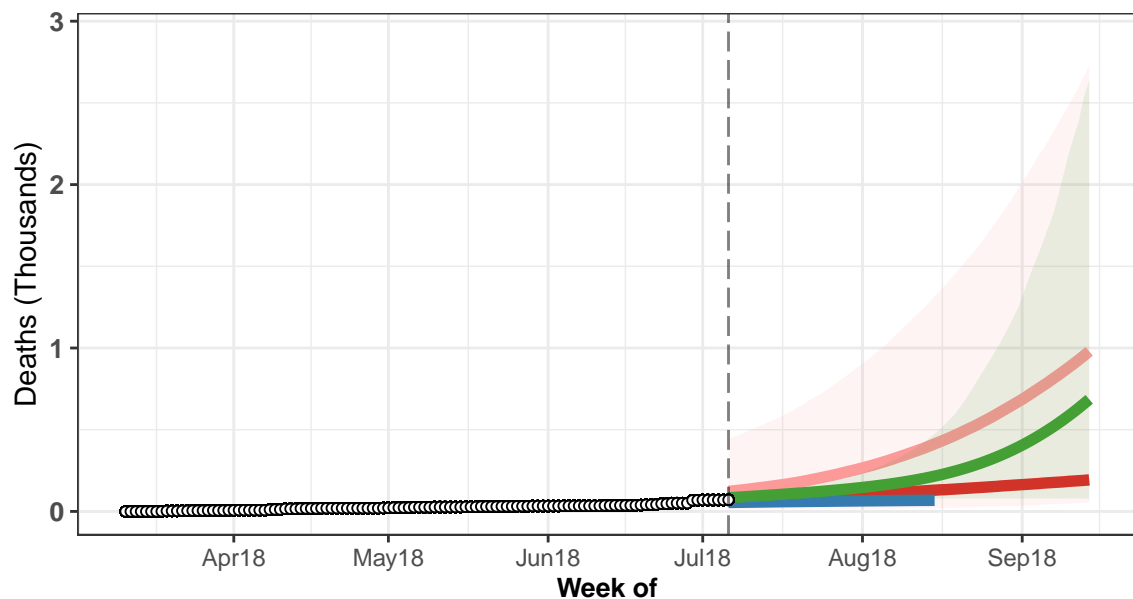

## Cumulative Out-Of-Sample Error (Post Intercept Shift)

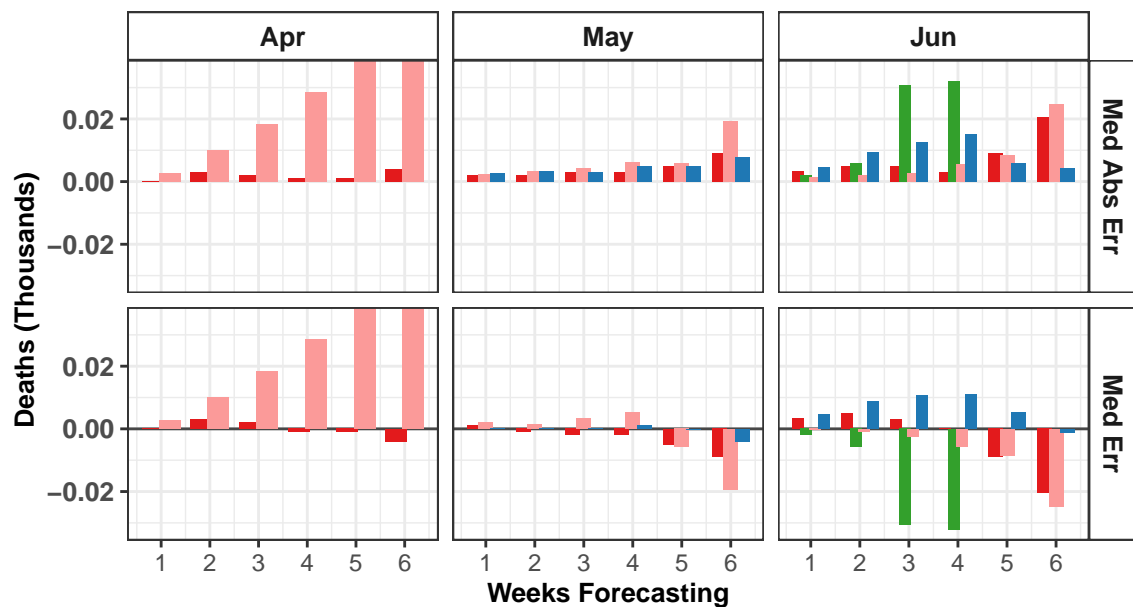

## All Model Versions

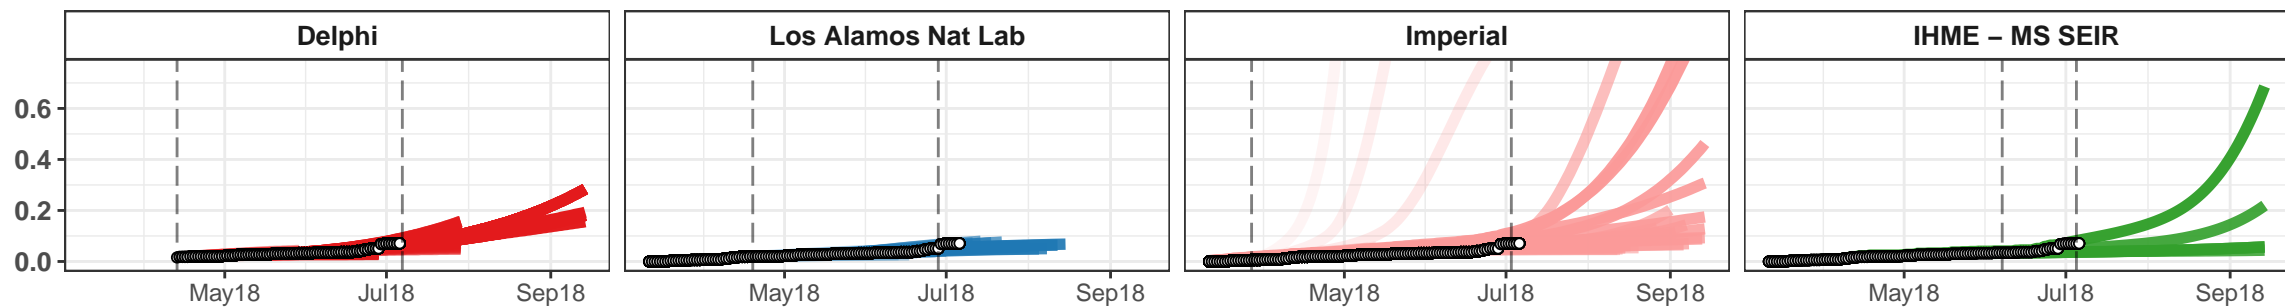

## All Cumulative Errors

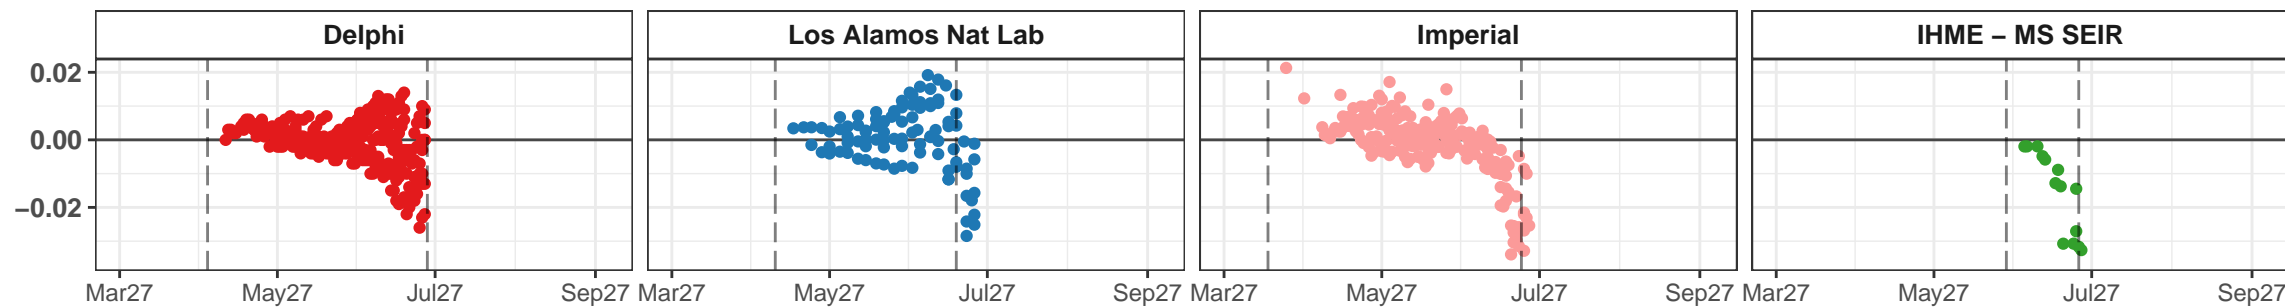

# Madagascar

## Current Forecast

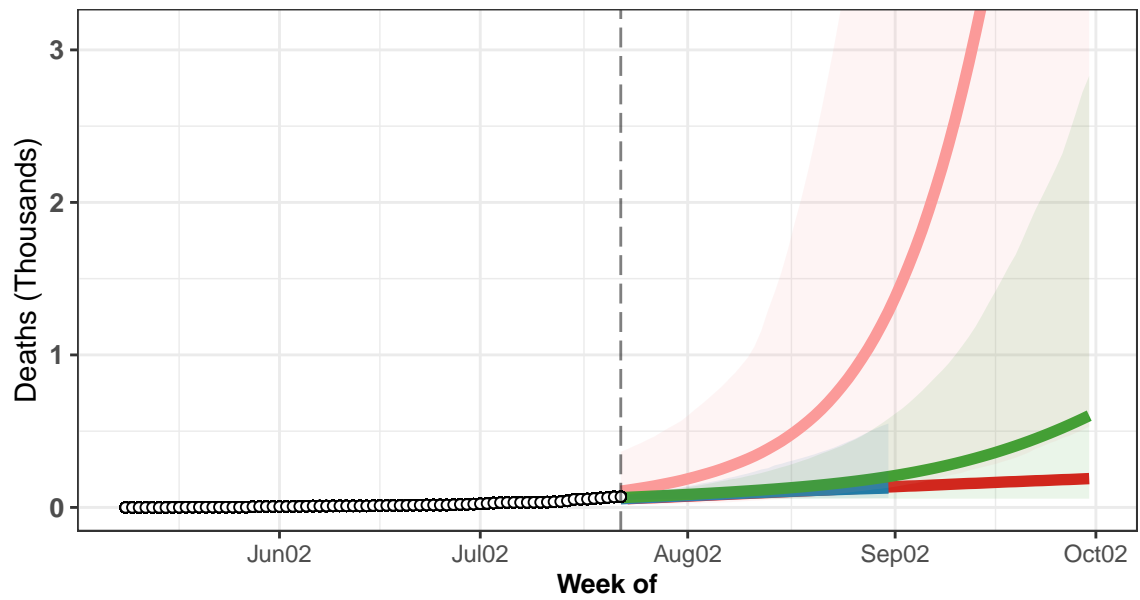

## Cumulative Out-Of-Sample Error (Post Intercept Shift)

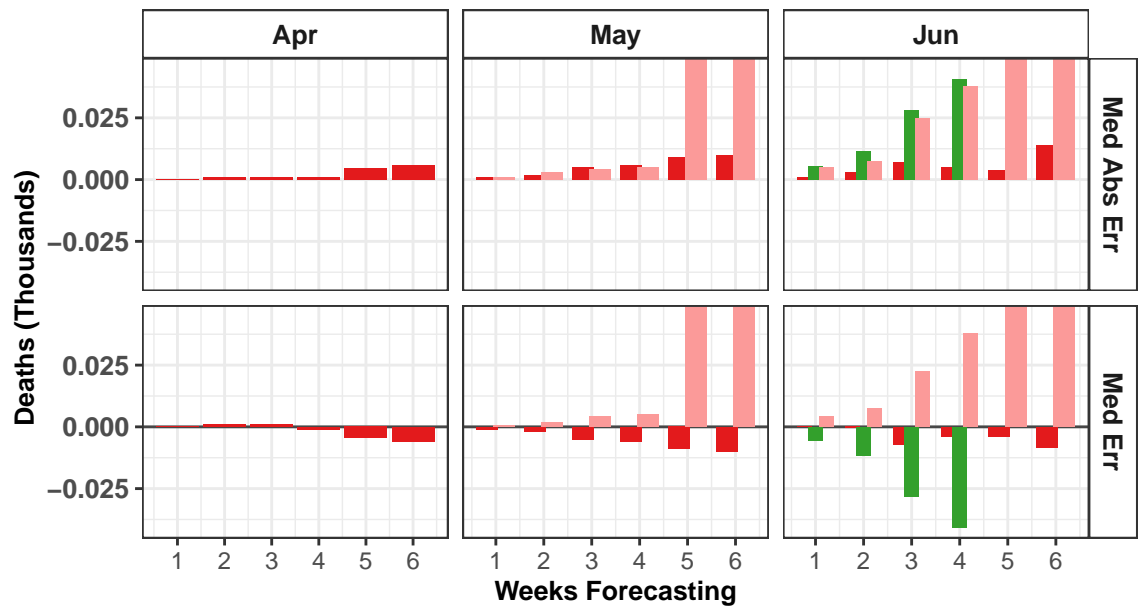

## All Model Versions

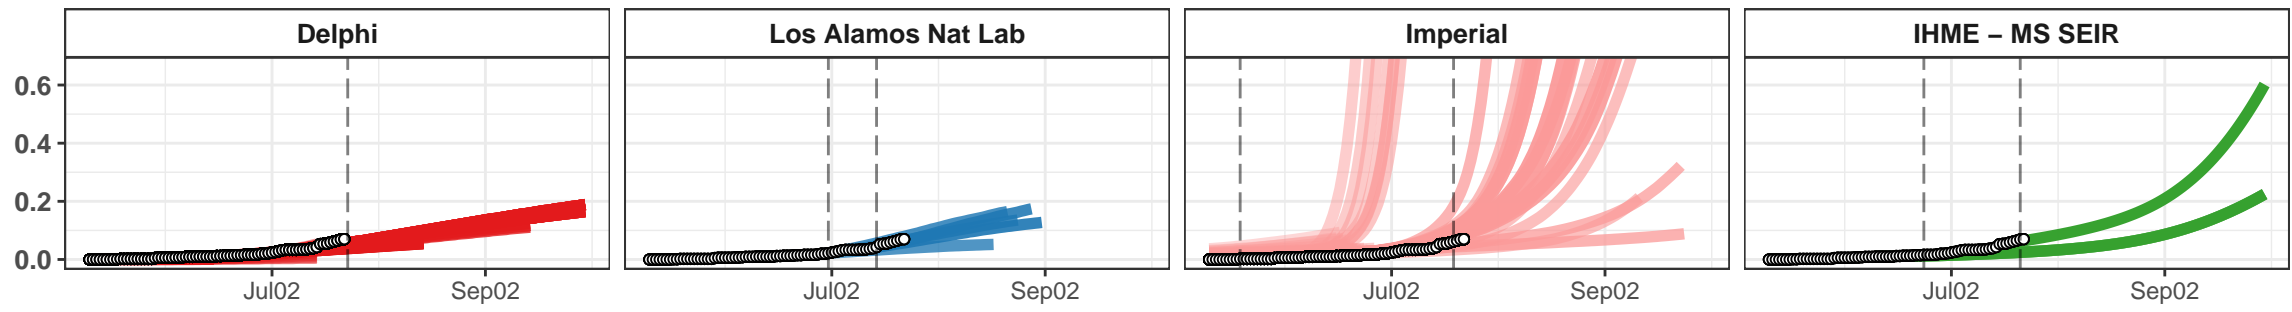

## All Cumulative Errors

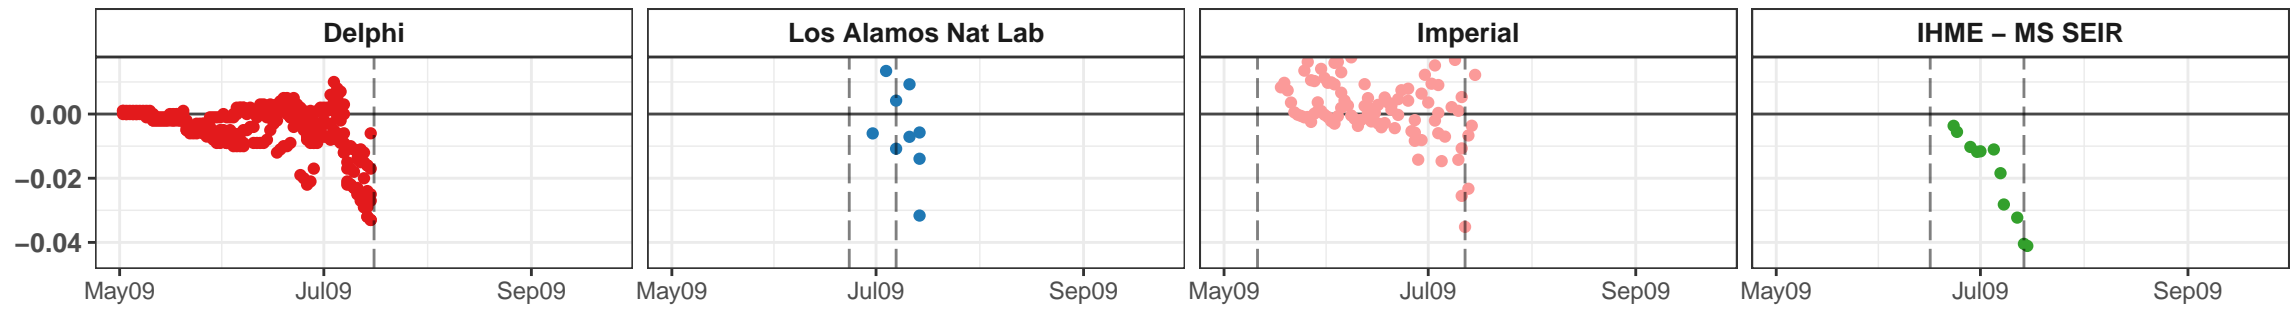

# Estonia

## Current Forecast

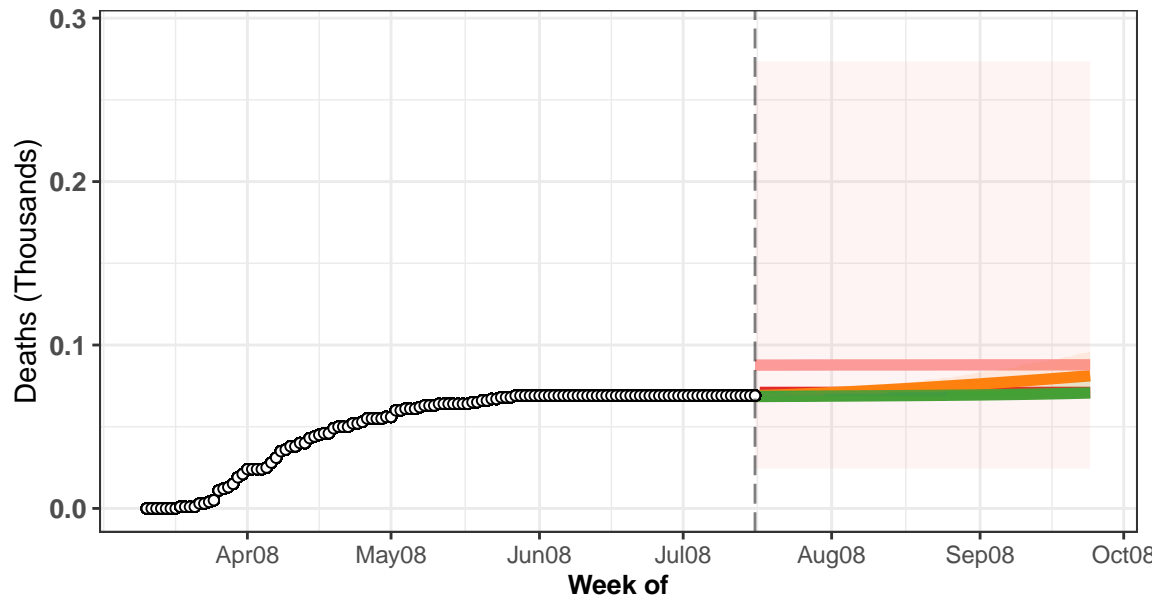

## Cumulative Out-Of-Sample Error (Post Intercept Shift)

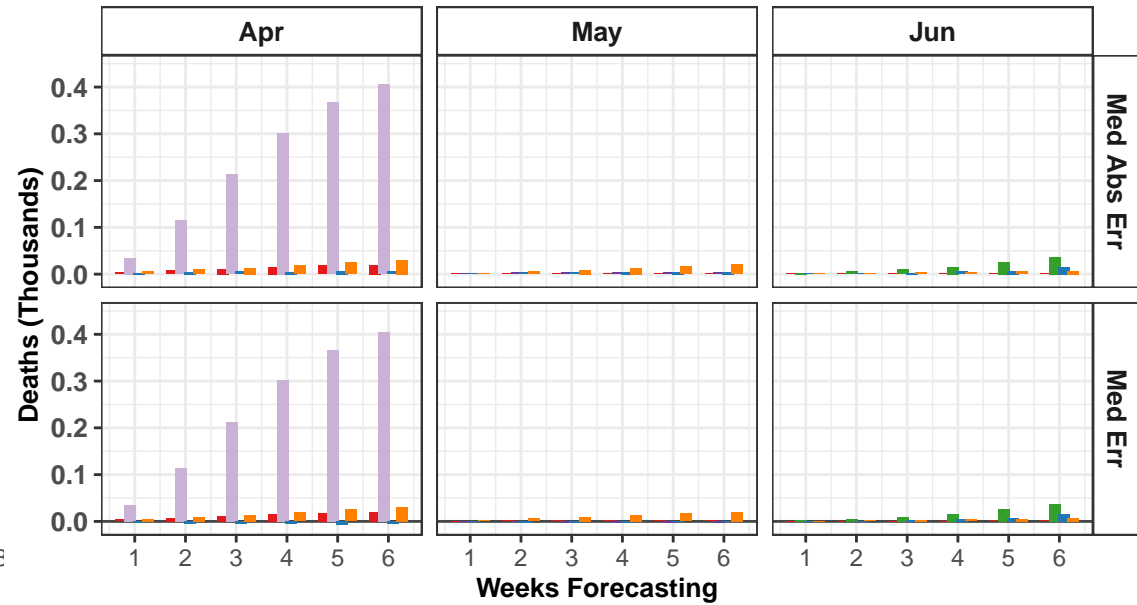

## All Model Versions

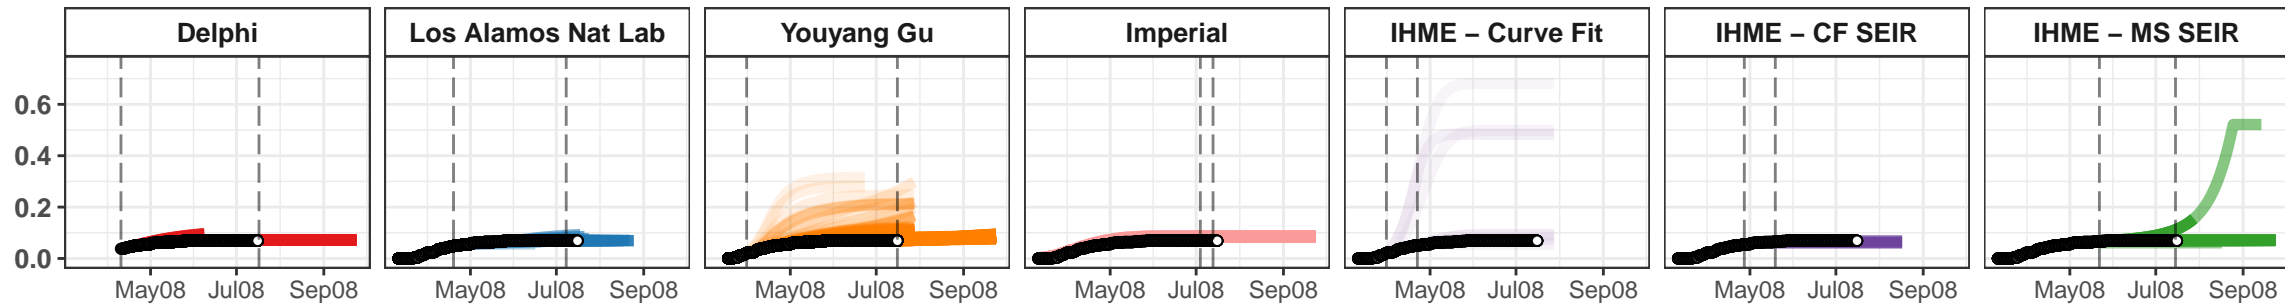

## All Cumulative Errors

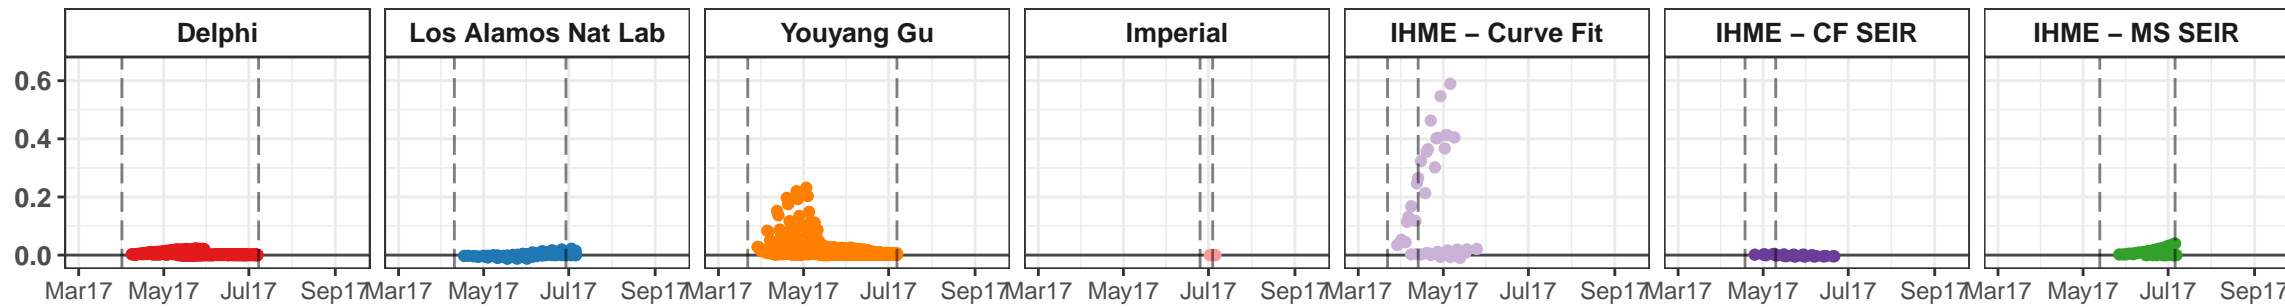

# Niger

## Current Forecast

Delphi Los Alamos Nat Lab Imperial IHME – MS SEIR

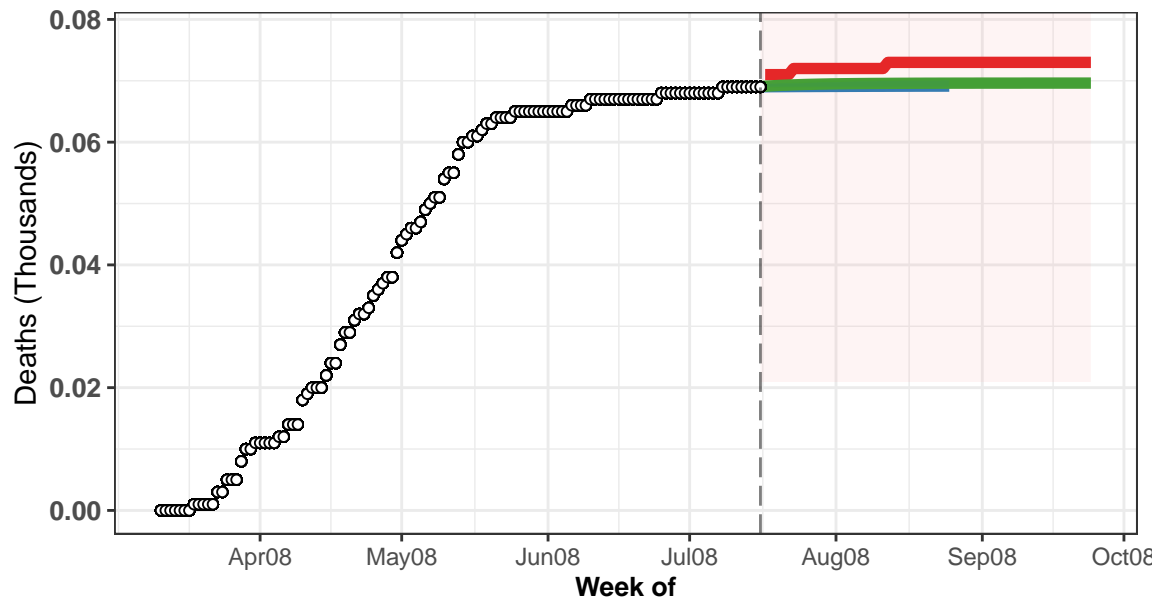

## Cumulative Out-Of-Sample Error (Post Intercept Shift)

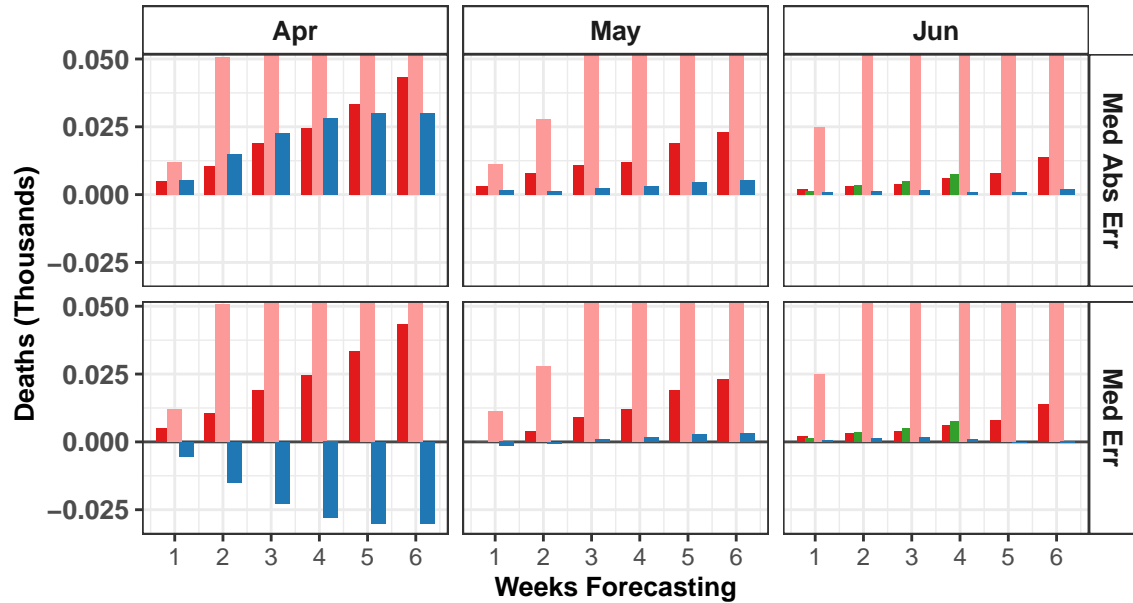

## All Model Versions

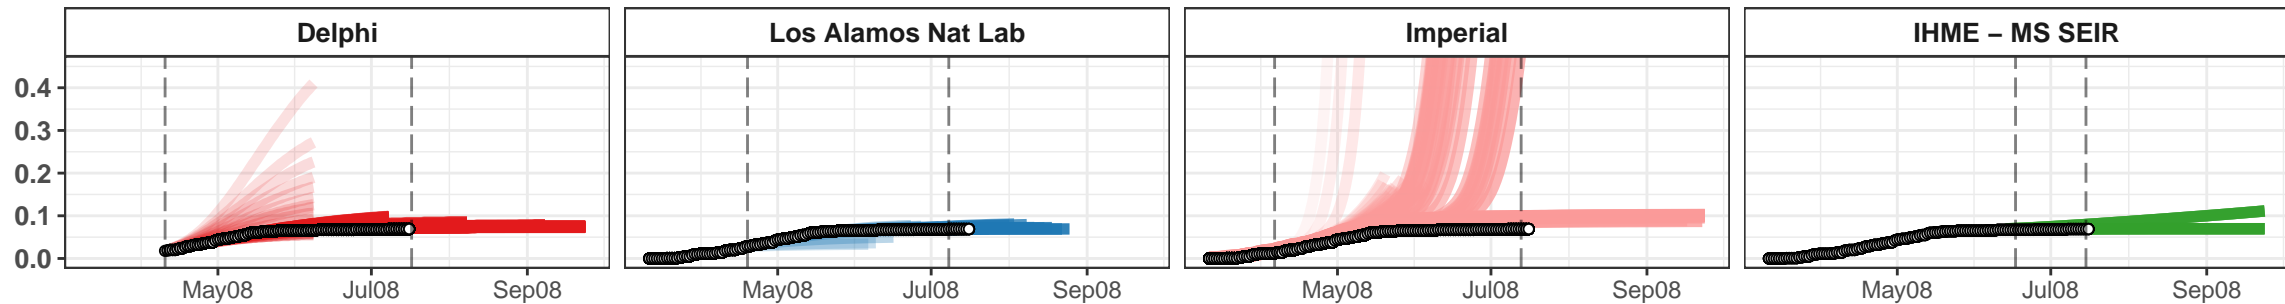

## All Cumulative Errors

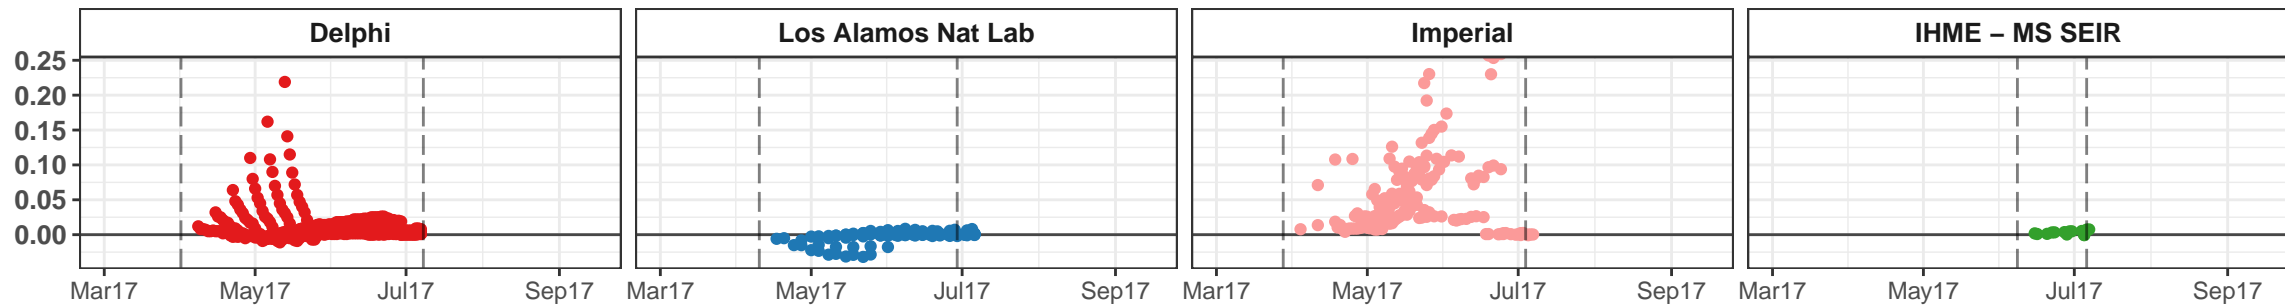



# Sierra Leone

## Current Forecast

Delphi Los Alamos Nat Lab Imperial IHME – MS SEIR

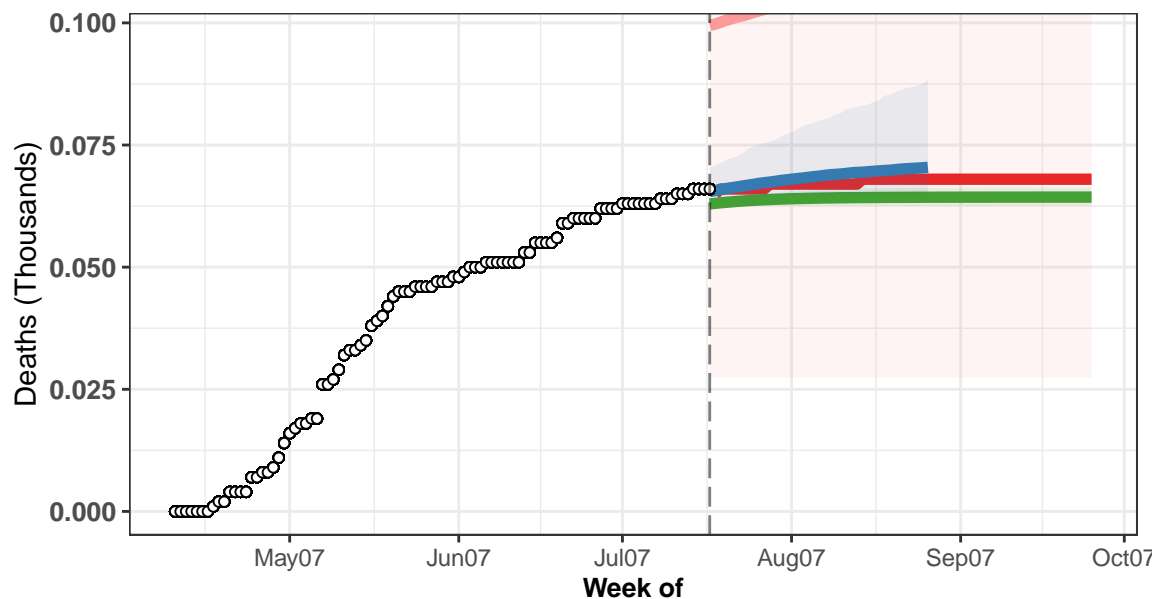

## Cumulative Out-Of-Sample Error (Post Intercept Shift)

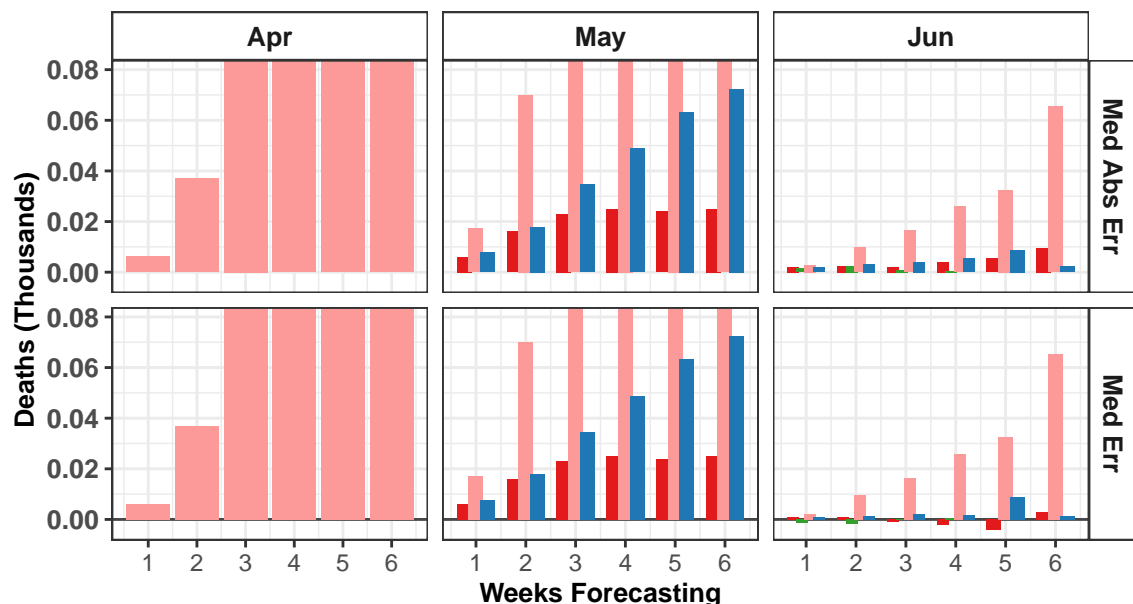

## All Model Versions

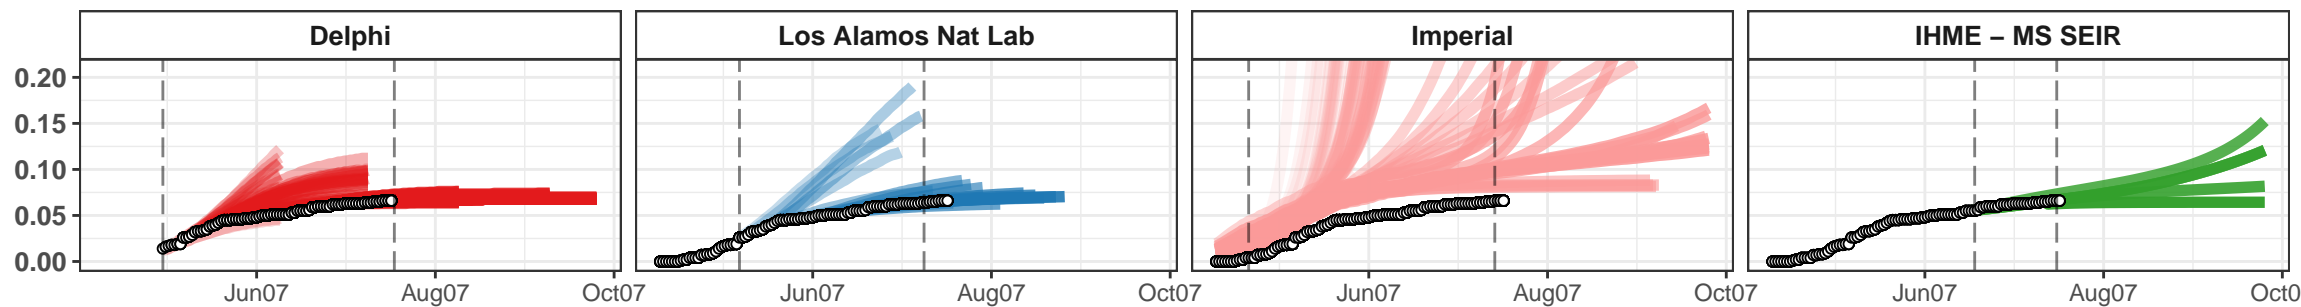

## All Cumulative Errors

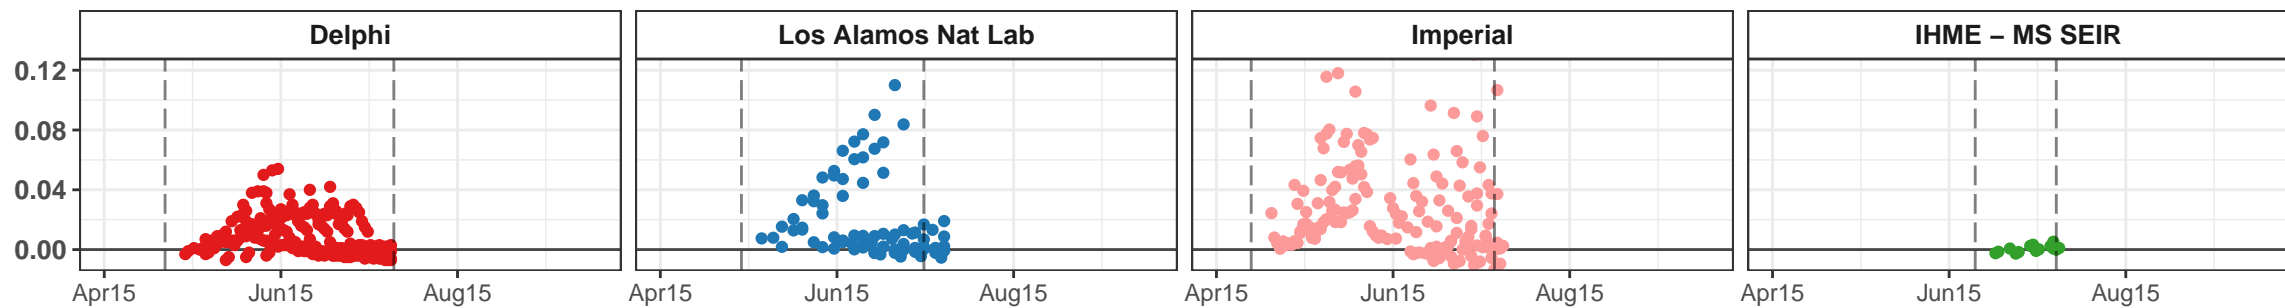

# Central African Republic

## Current Forecast

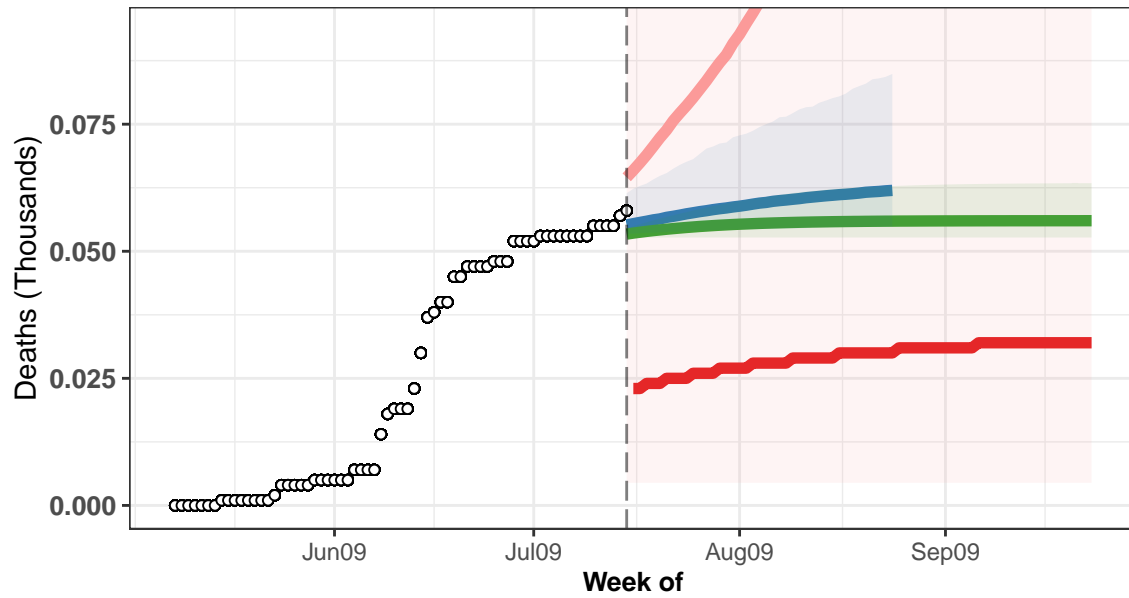

## Cumulative Out-Of-Sample Error (Post Intercept Shift)

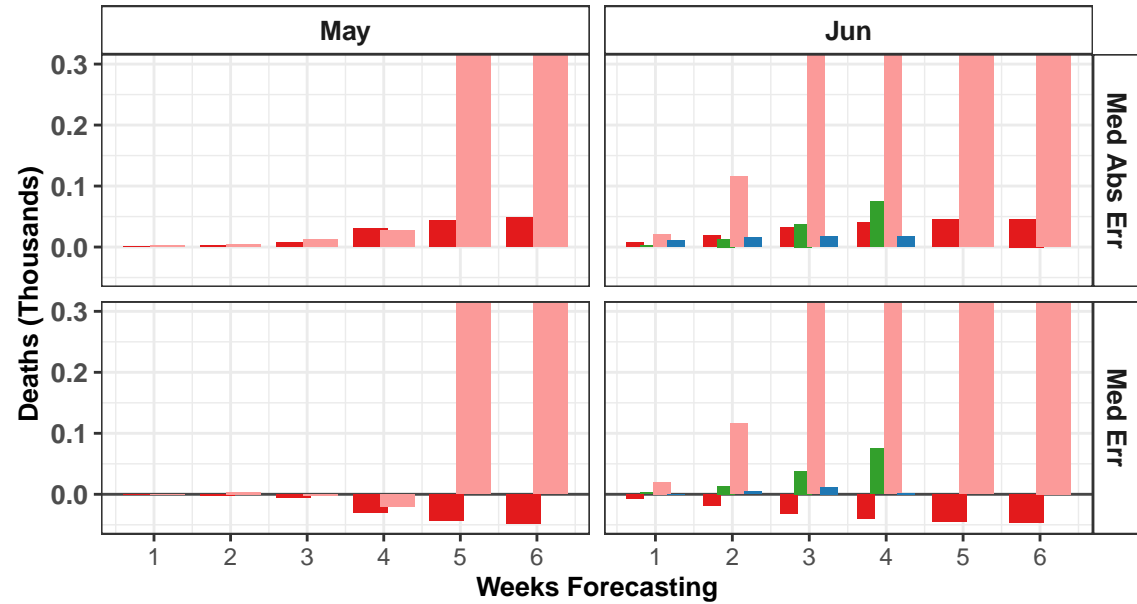

## All Model Versions

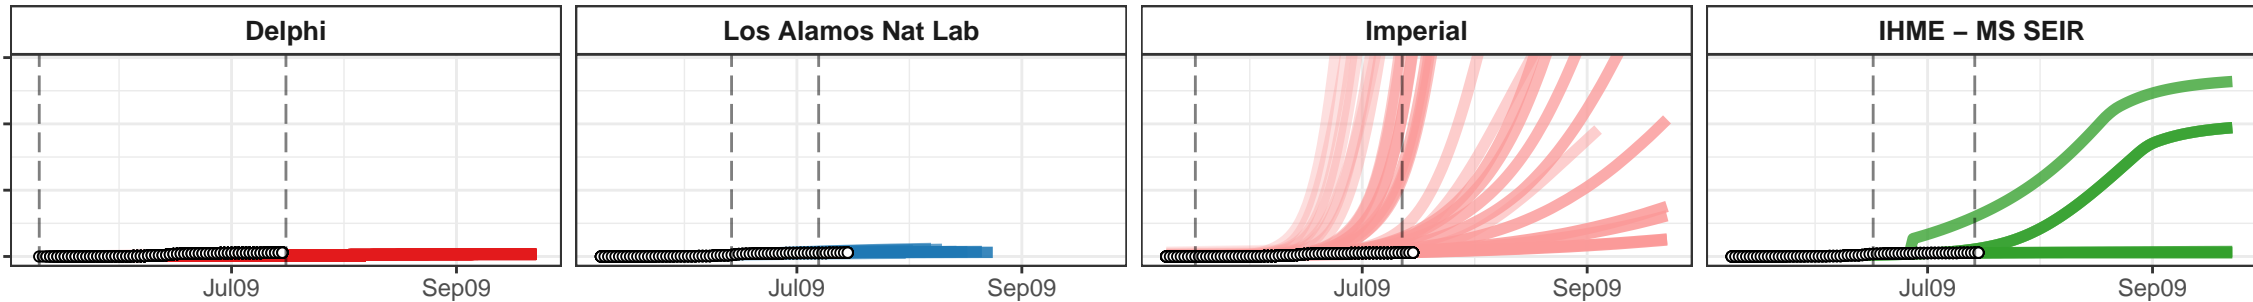

## All Cumulative Errors

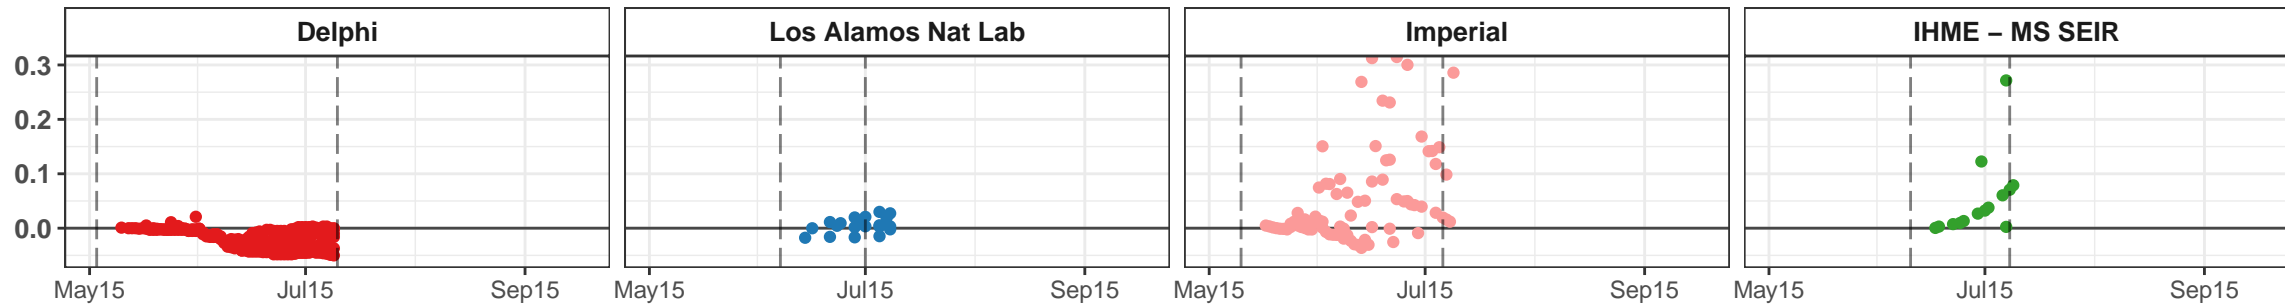

# Djibouti

## Current Forecast

Delphi Los Alamos Nat Lab Imperial IHME – MS SEIR

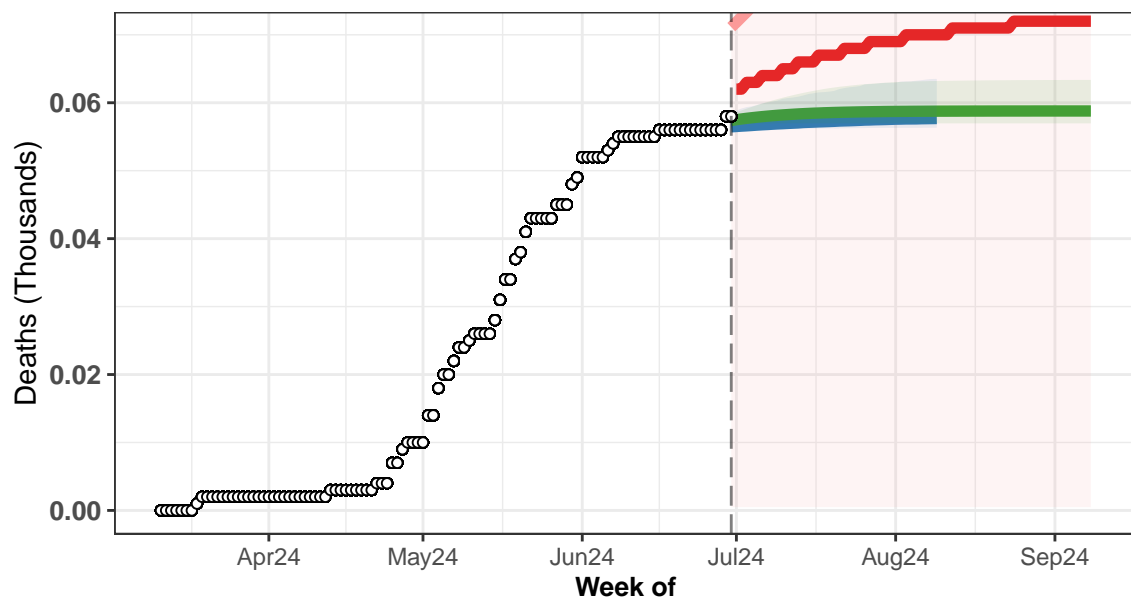

## Cumulative Out-Of-Sample Error (Post Intercept Shift)

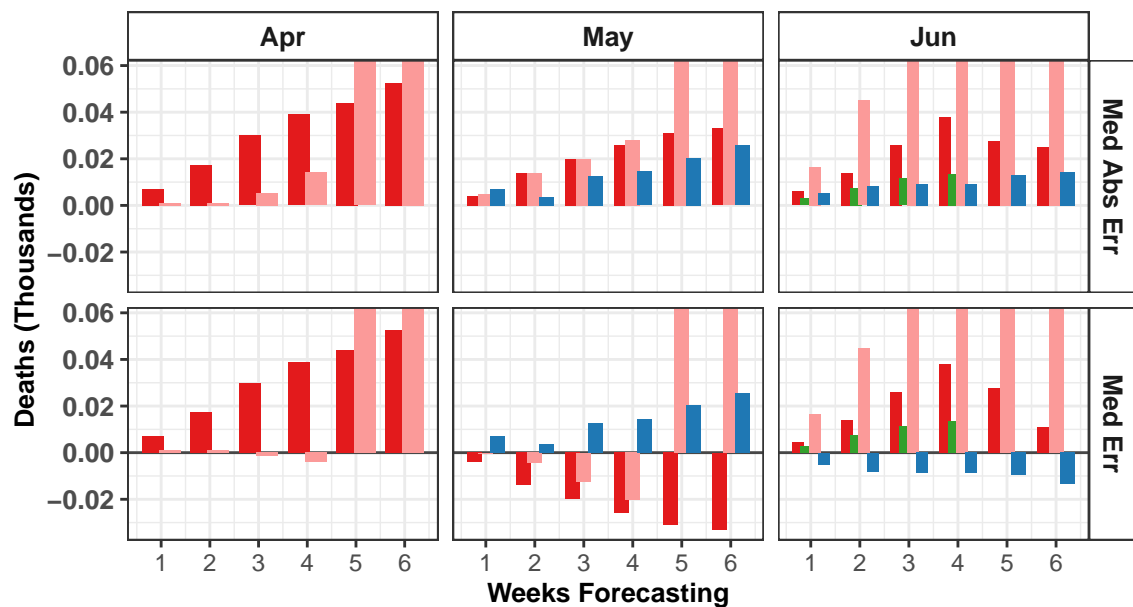

## All Model Versions

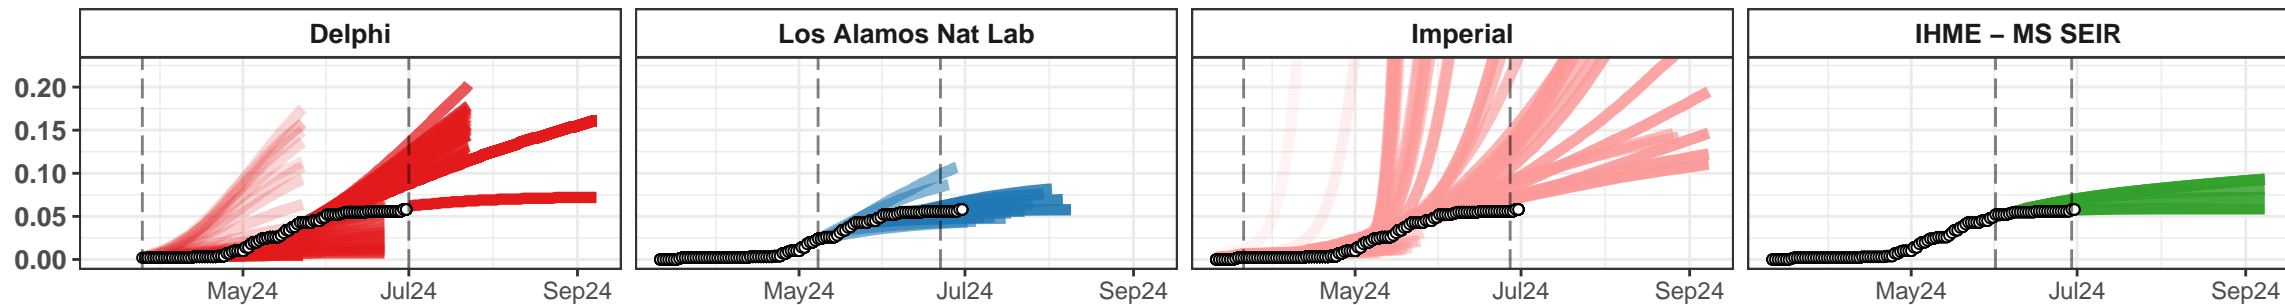

## All Cumulative Errors

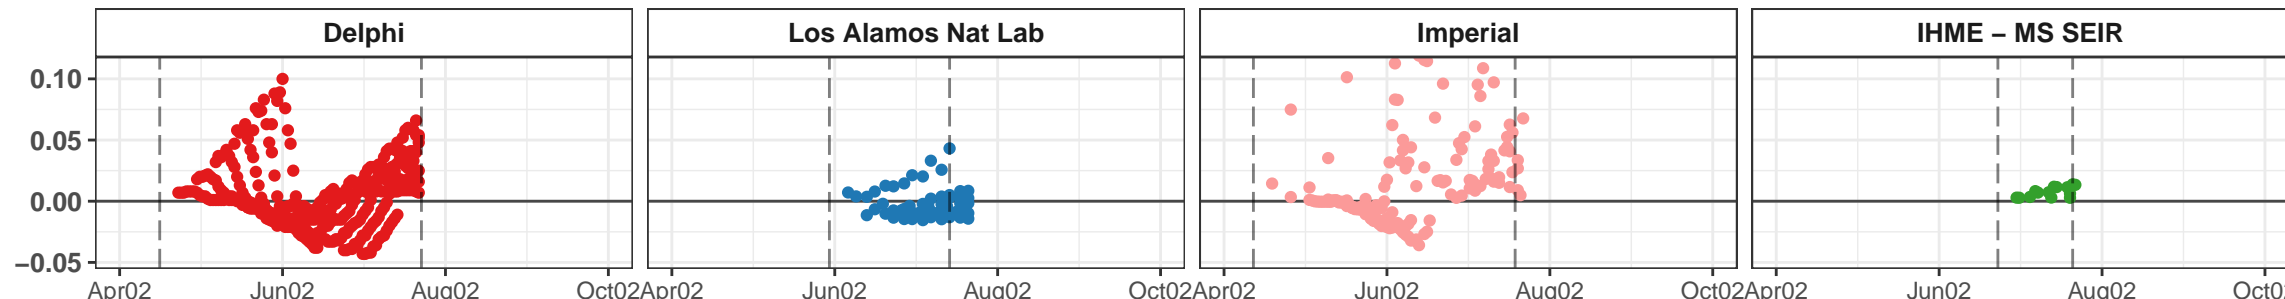

# Tajikistan

## Current Forecast

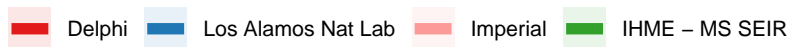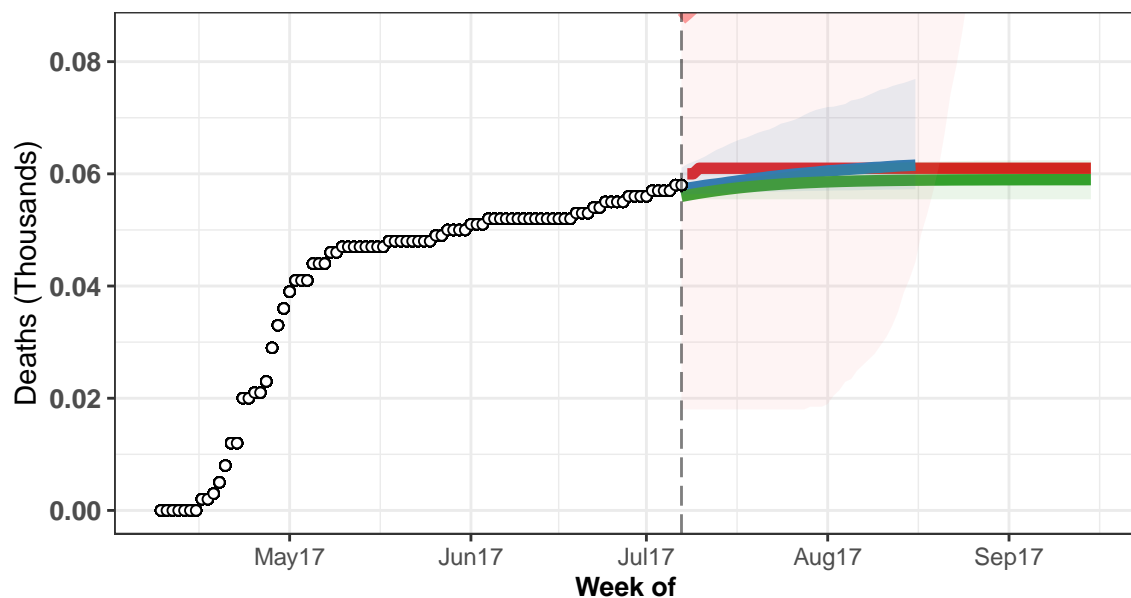

## Cumulative Out-Of-Sample Error (Post Intercept Shift)

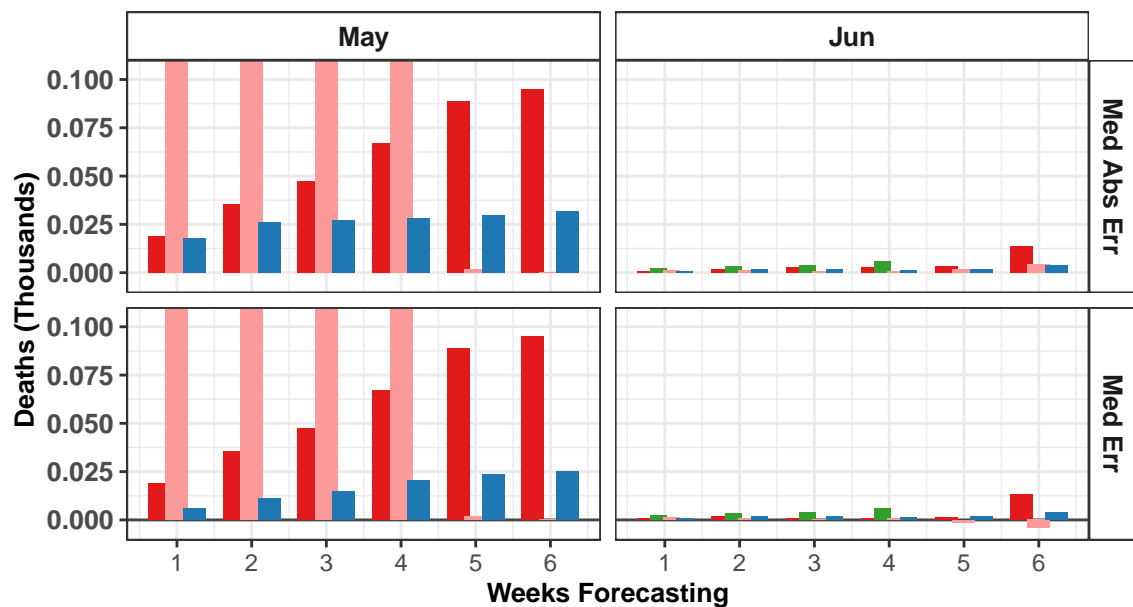

## All Model Versions

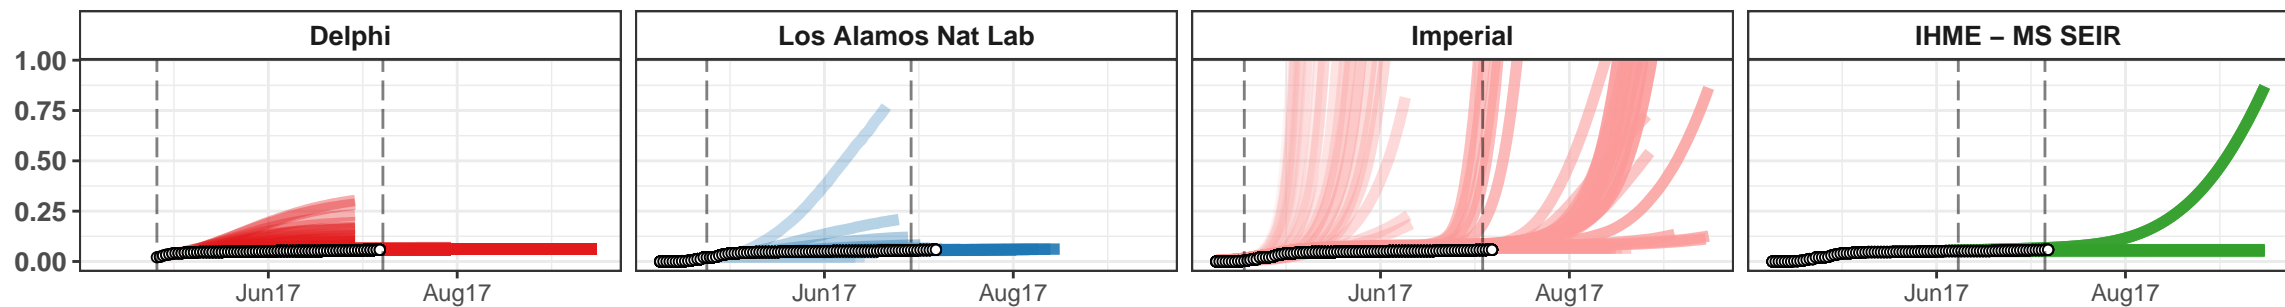

## All Cumulative Errors

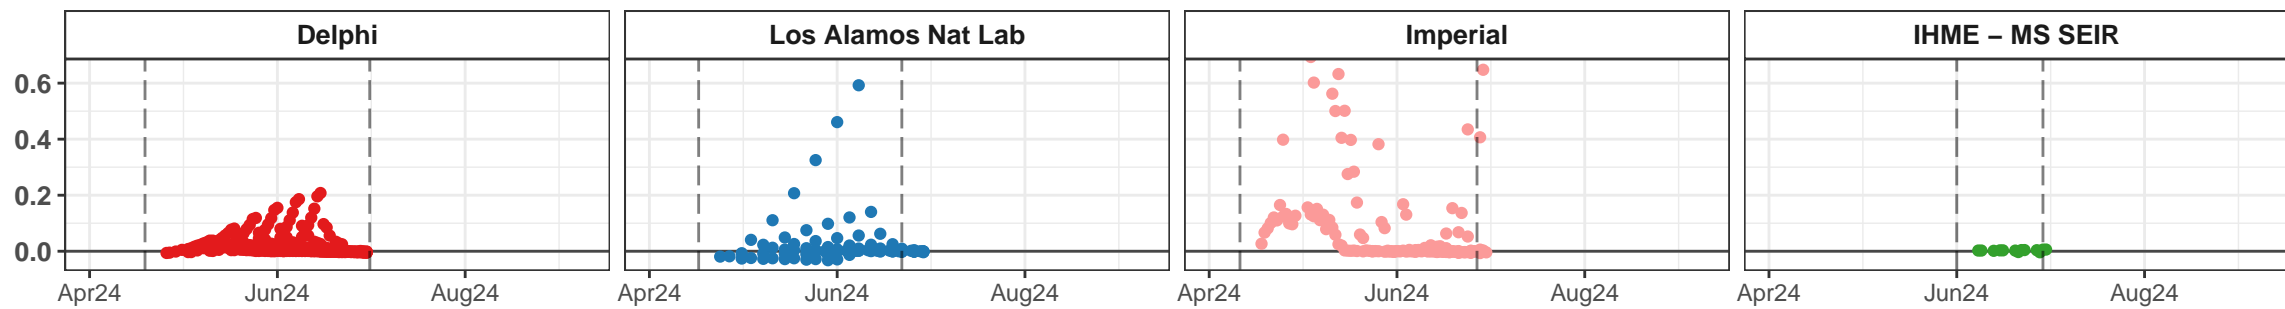

# Thailand

## Current Forecast

Delphi Los Alamos Nat Lab Imperial IHME – MS SEIR

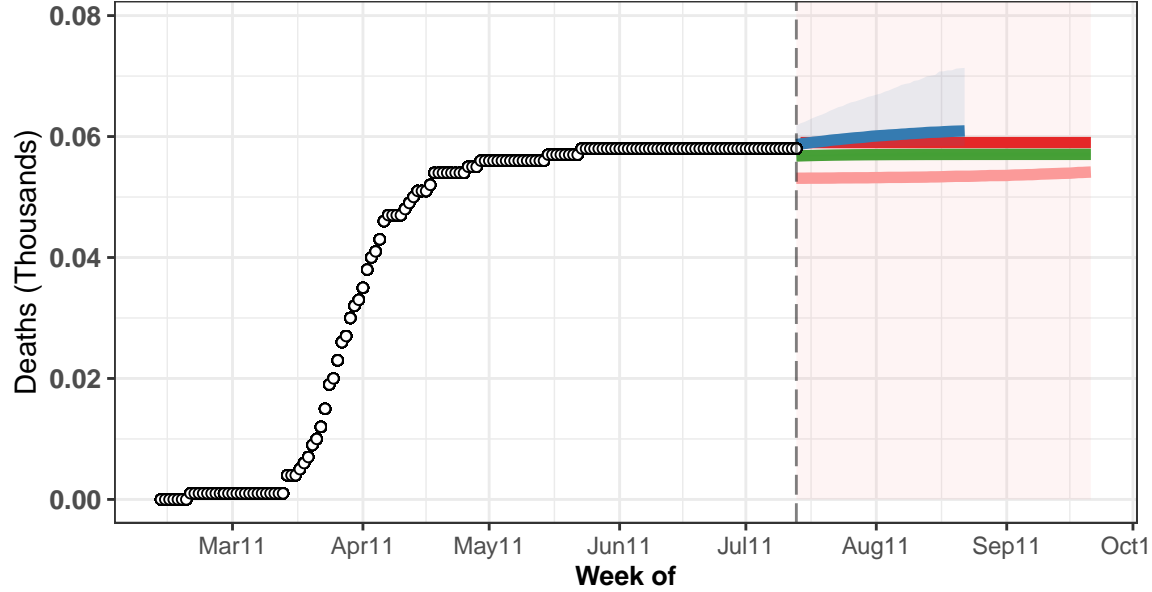

## Cumulative Out-Of-Sample Error (Post Intercept Shift)

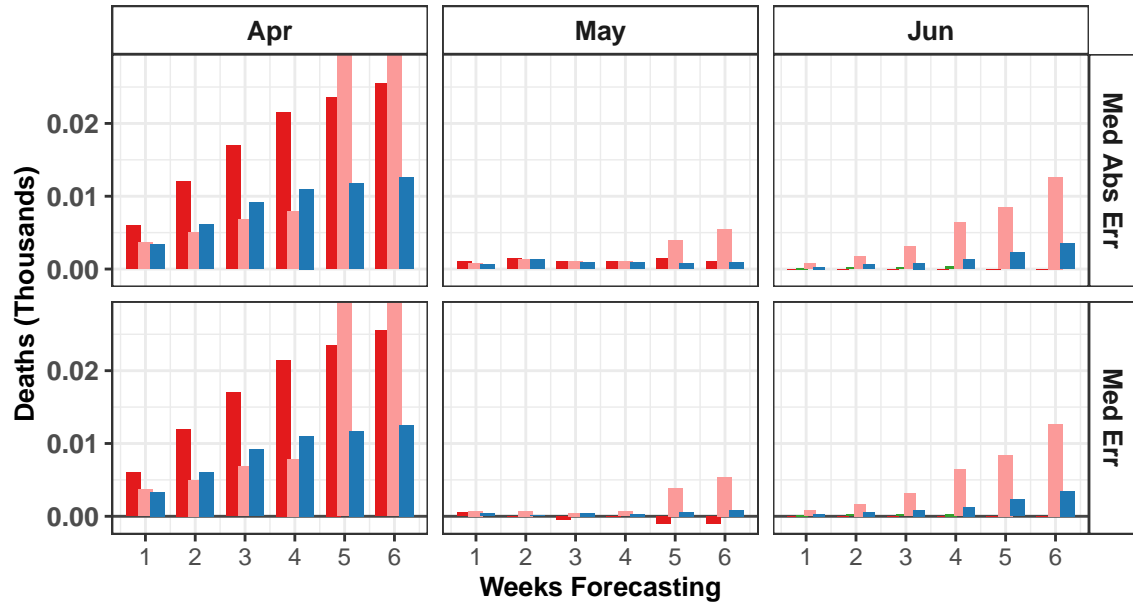

## All Model Versions

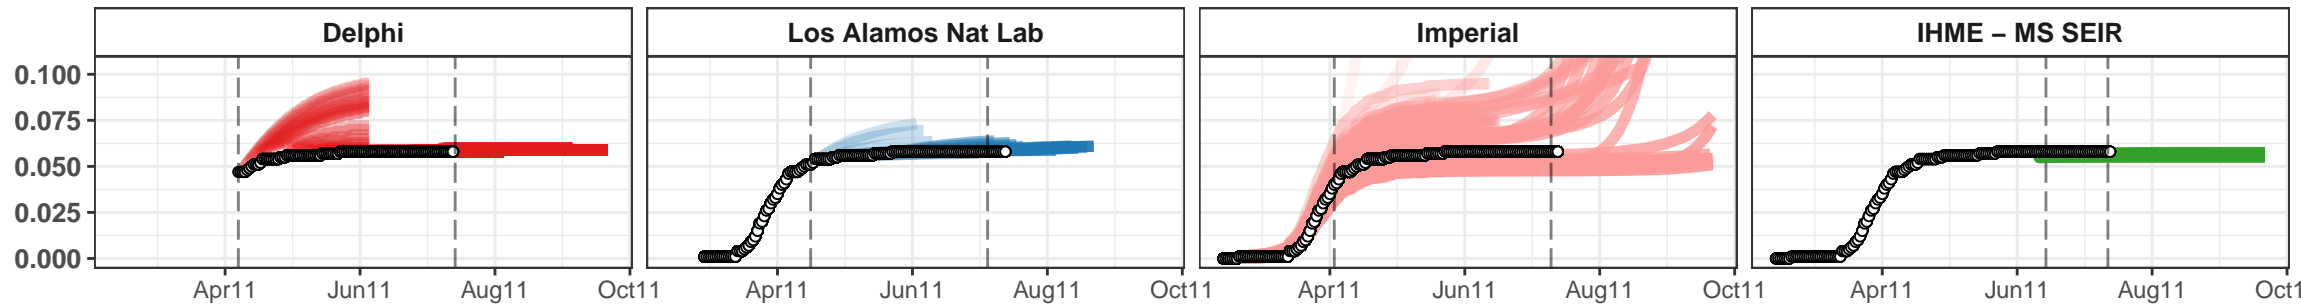

## All Cumulative Errors

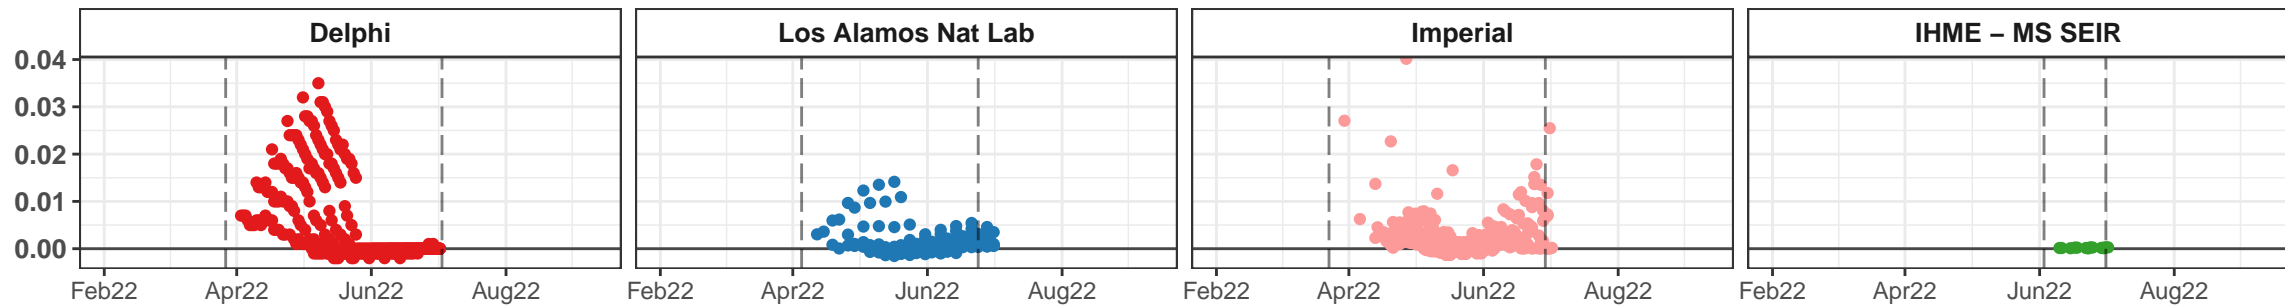

# Libya

## Current Forecast

Delphi Los Alamos Nat Lab Imperial IHME – MS SEIR

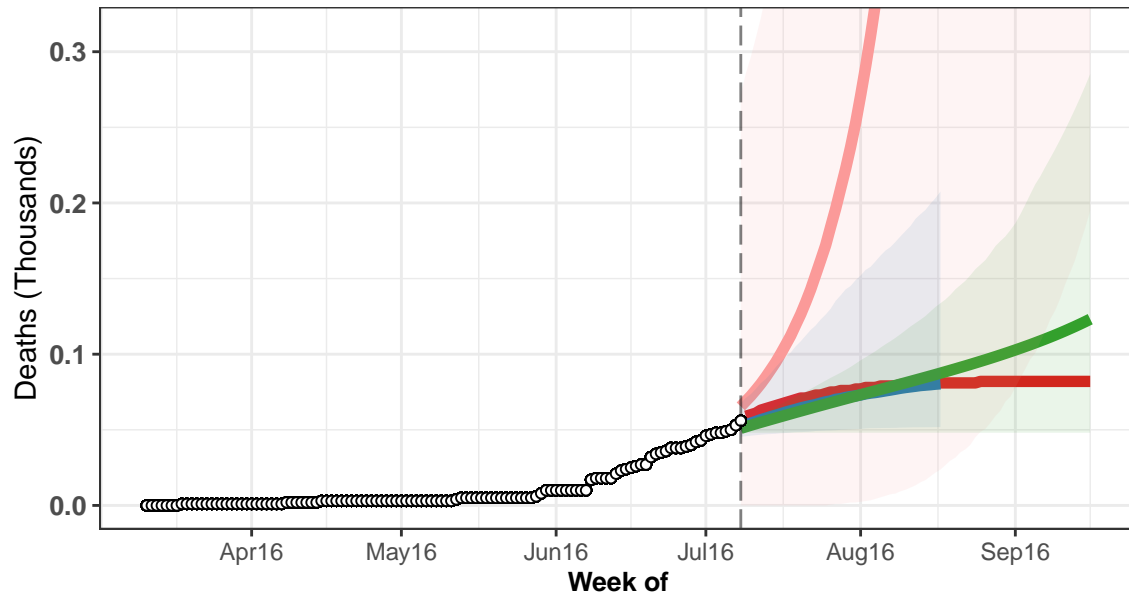

## Cumulative Out-Of-Sample Error (Post Intercept Shift)

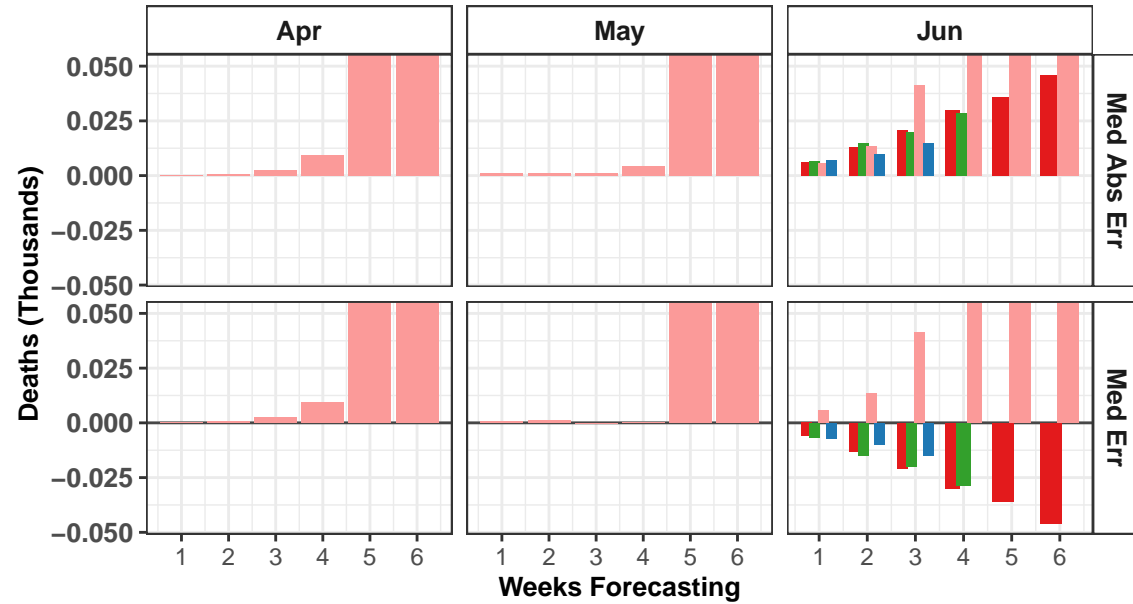

## All Model Versions

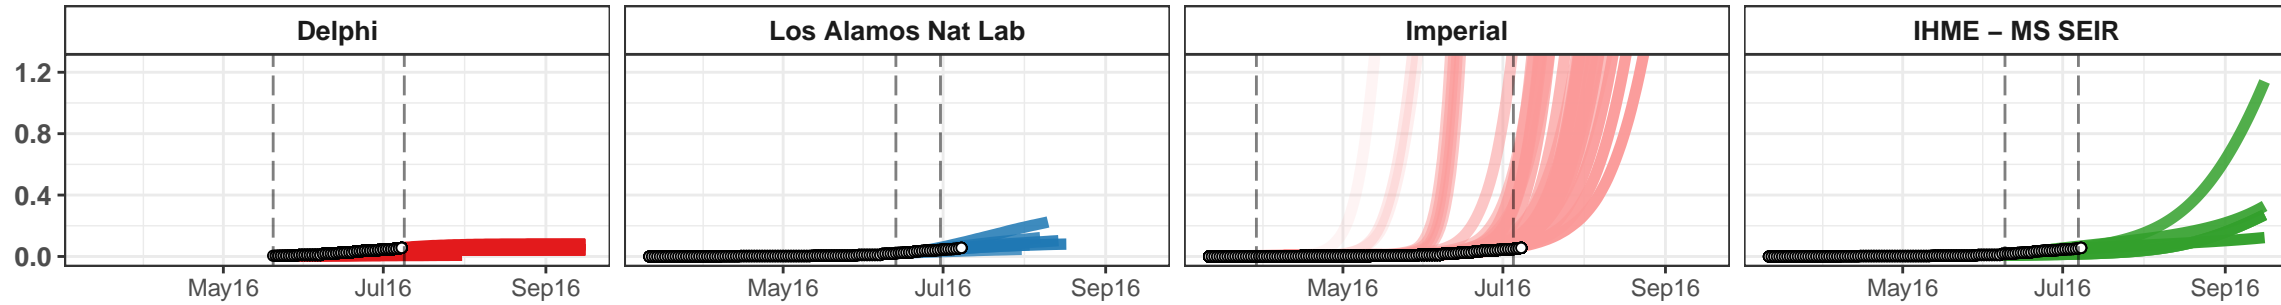

## All Cumulative Errors

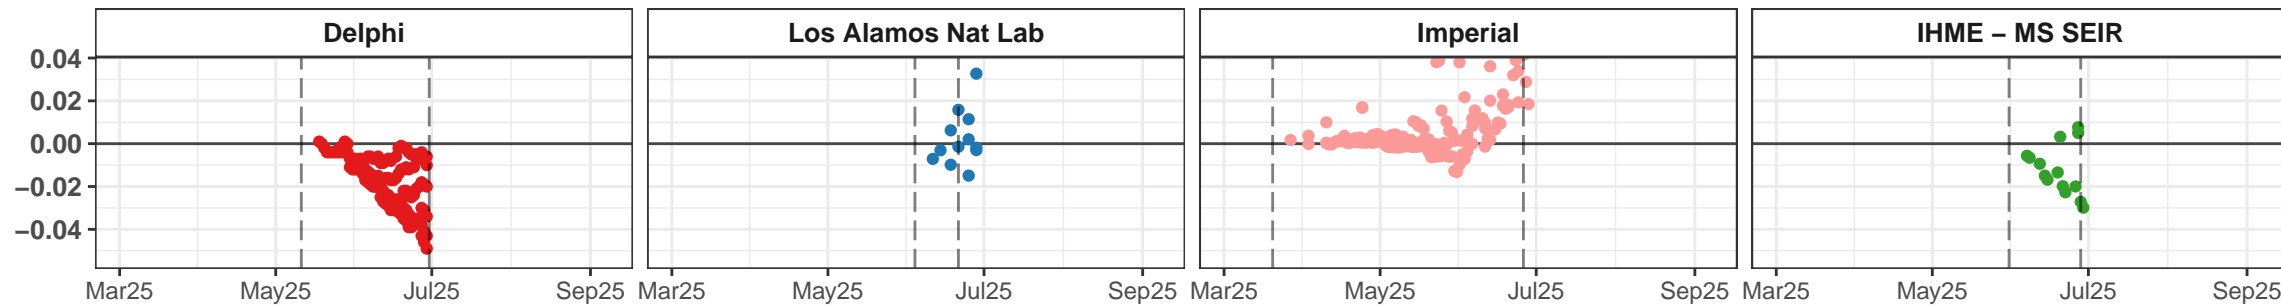

# Vermont

## Current Forecast

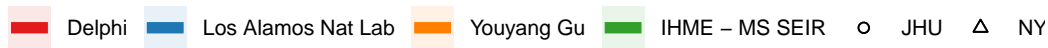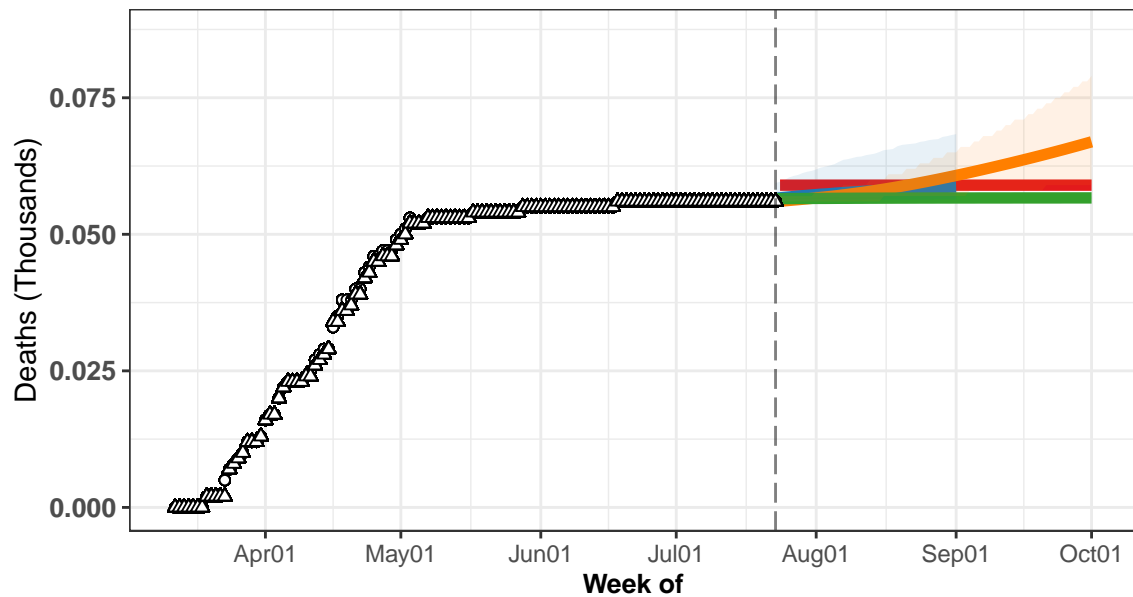

## Cumulative Out-Of-Sample Error (Post Intercept Shift)

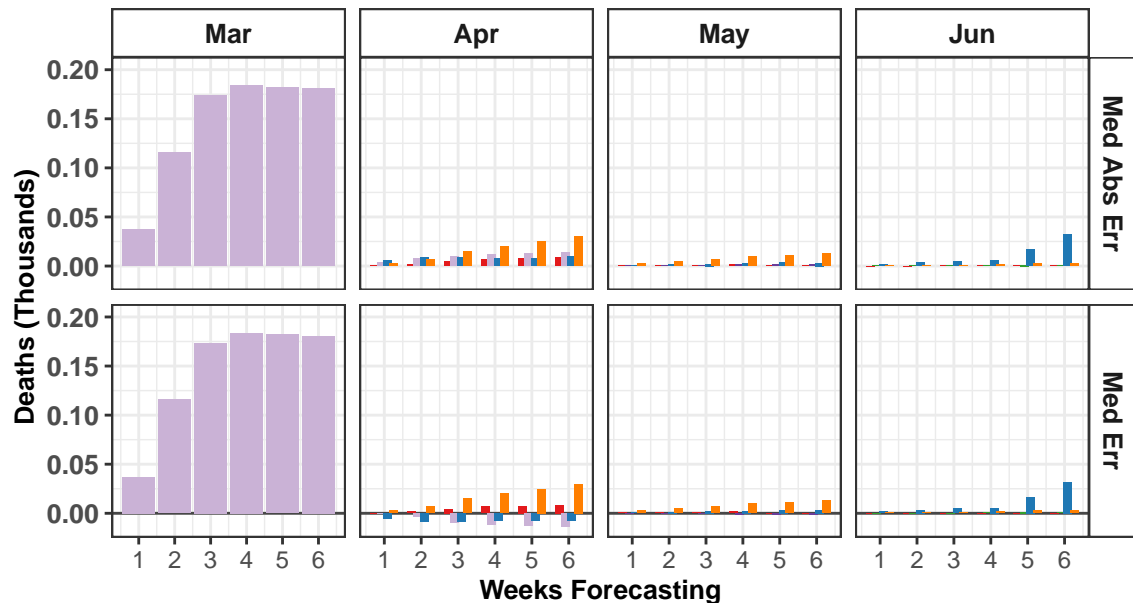

## All Model Versions

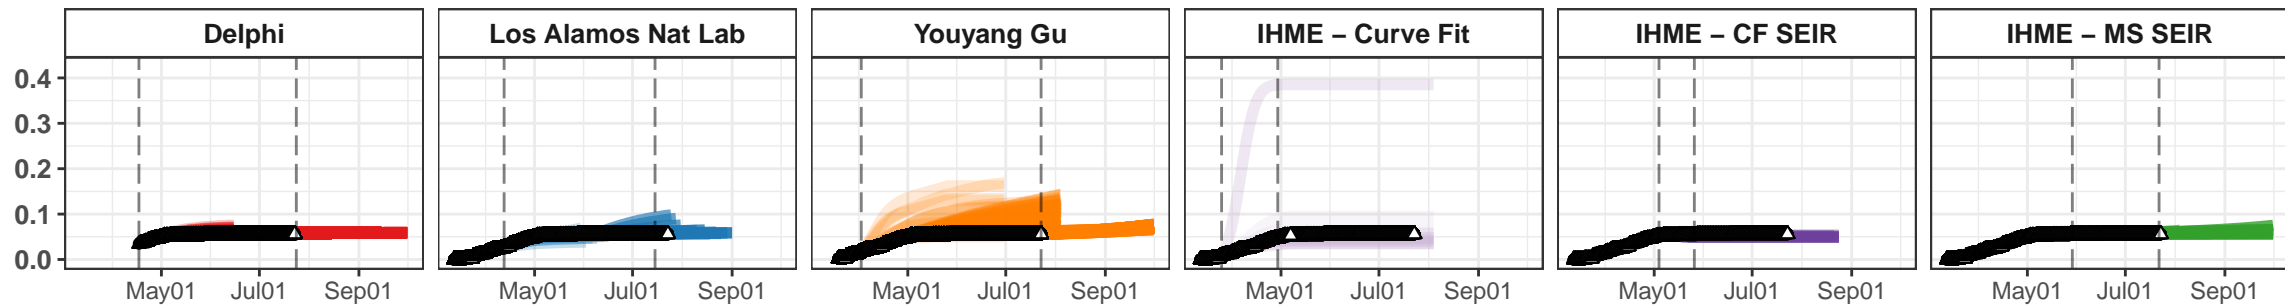

## All Cumulative Errors

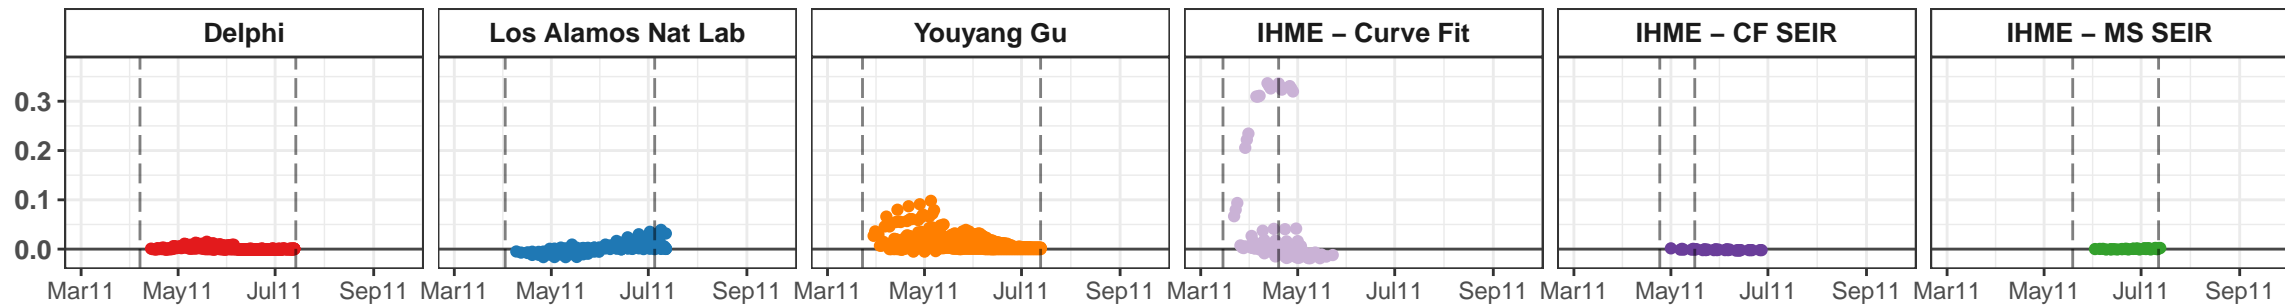

# Burkina Faso

## Current Forecast

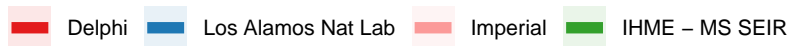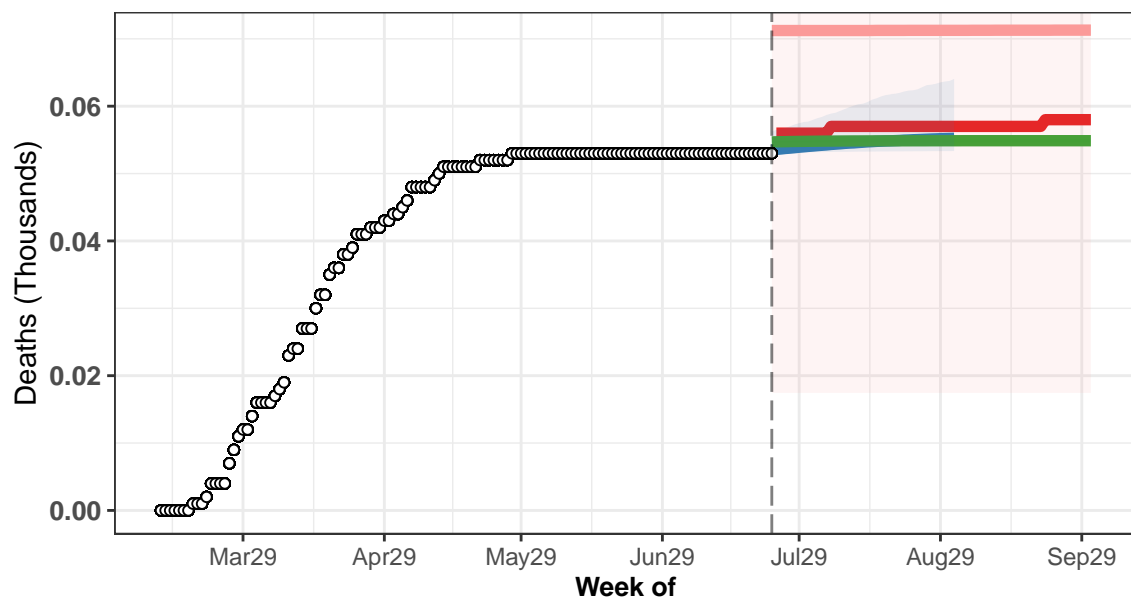

## Cumulative Out-Of-Sample Error (Post Intercept Shift)

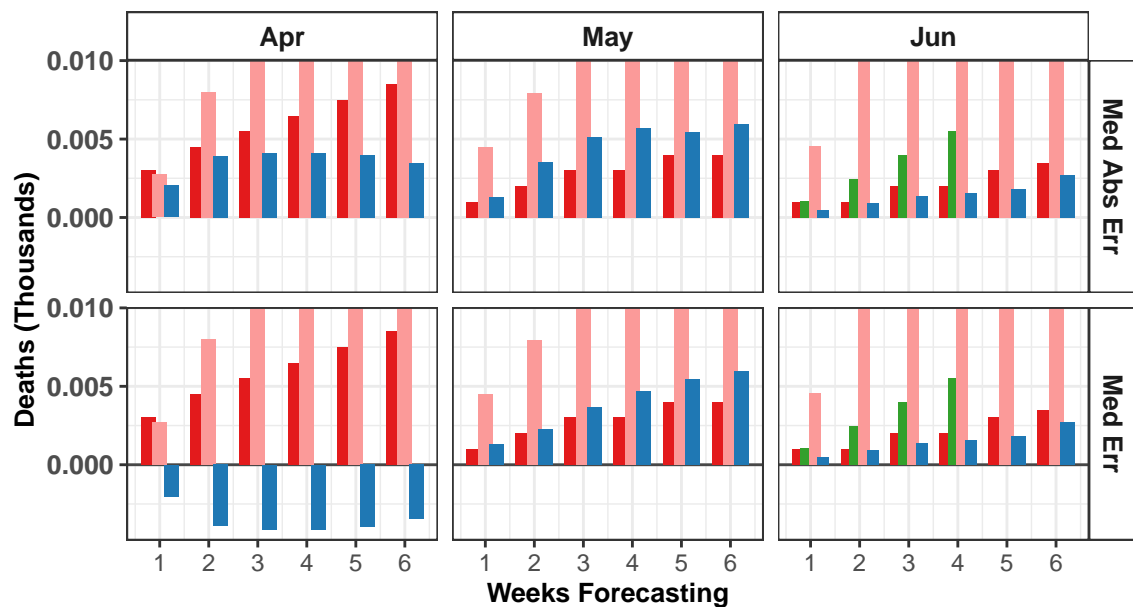

## All Model Versions

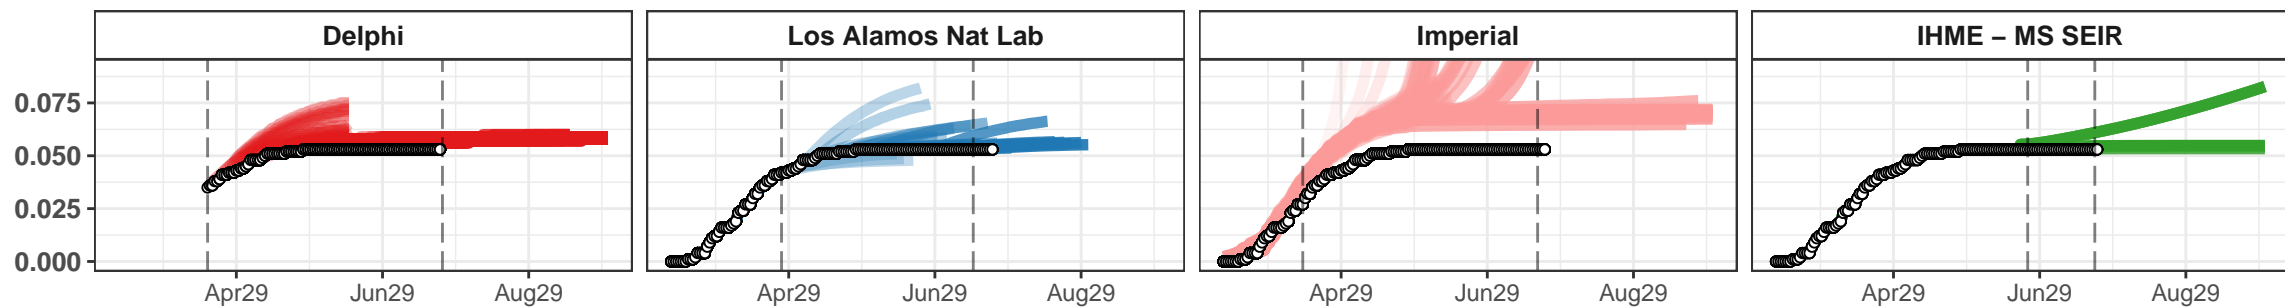

## All Cumulative Errors

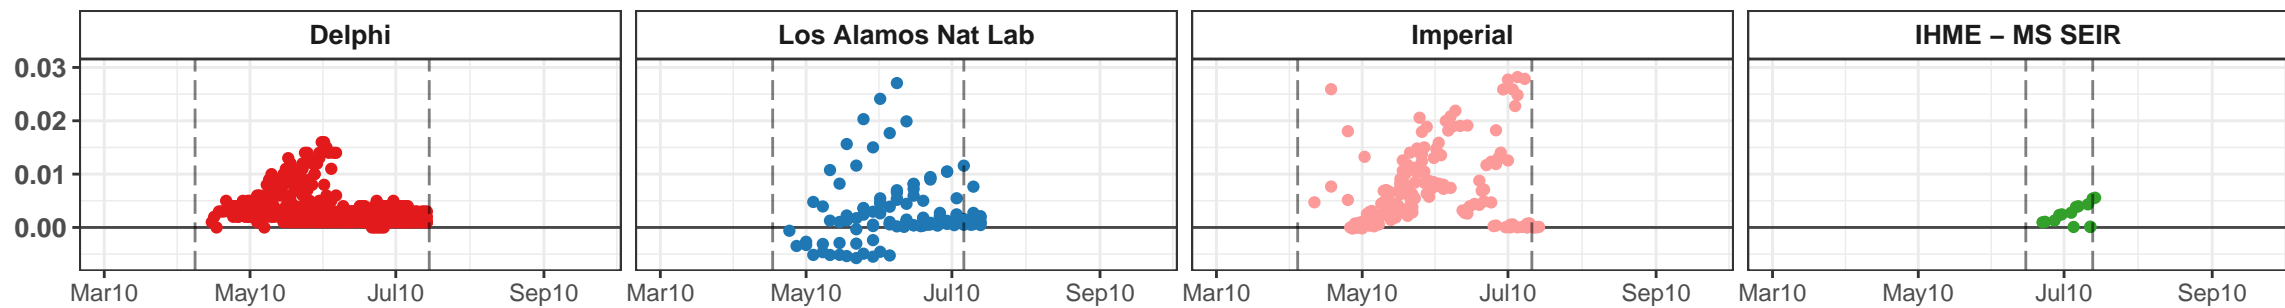



# Andorra

## Current Forecast

Delphi Los Alamos Nat Lab IHME – MS SEIR

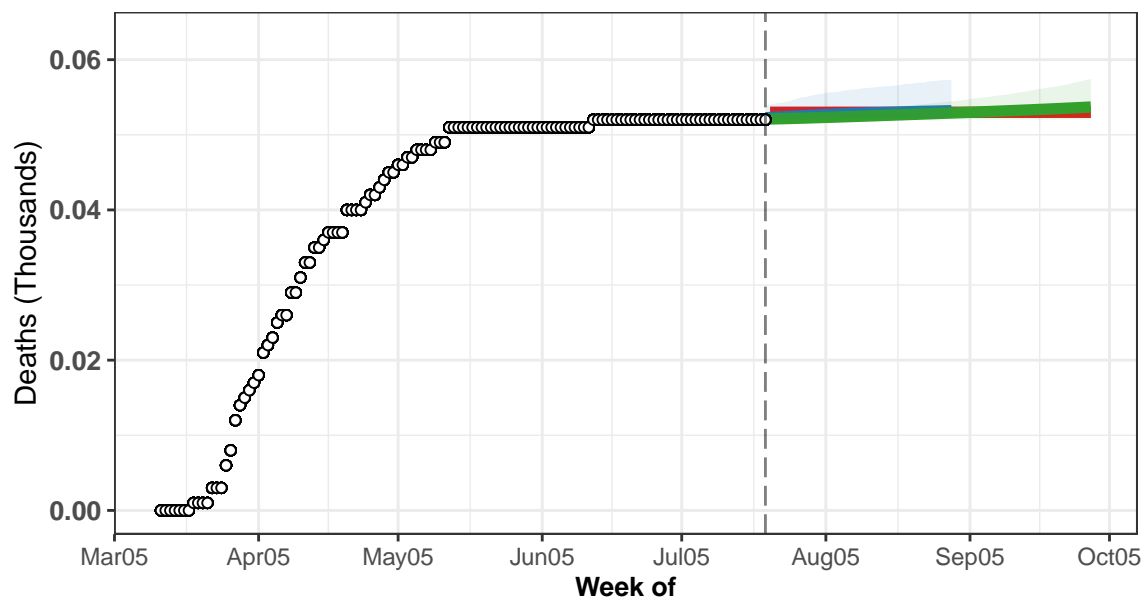

## Cumulative Out-Of-Sample Error (Post Intercept Shift)

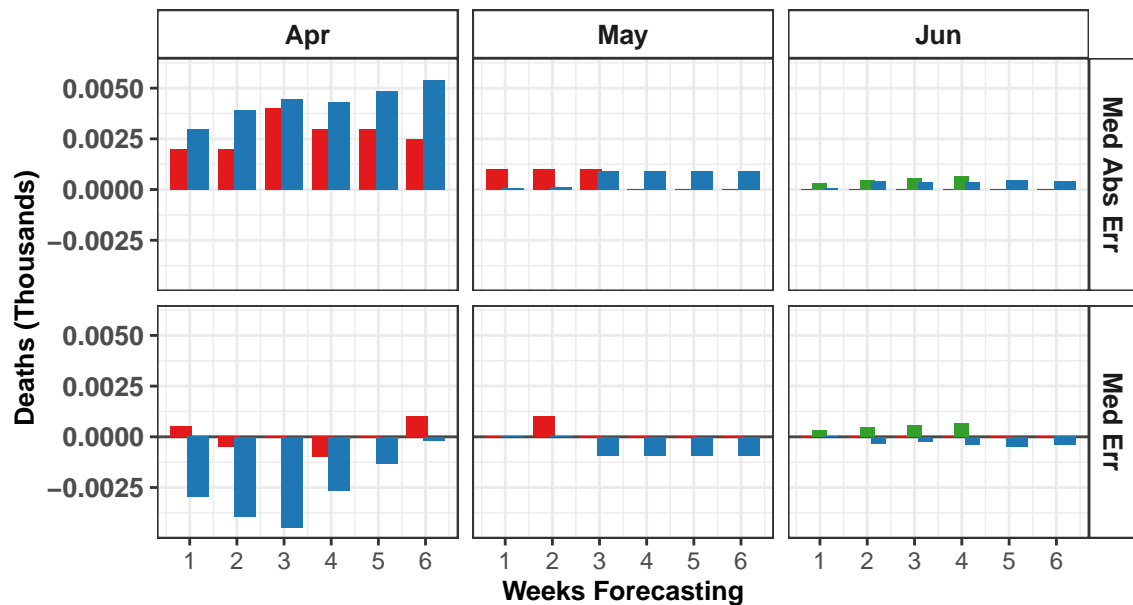

## All Model Versions

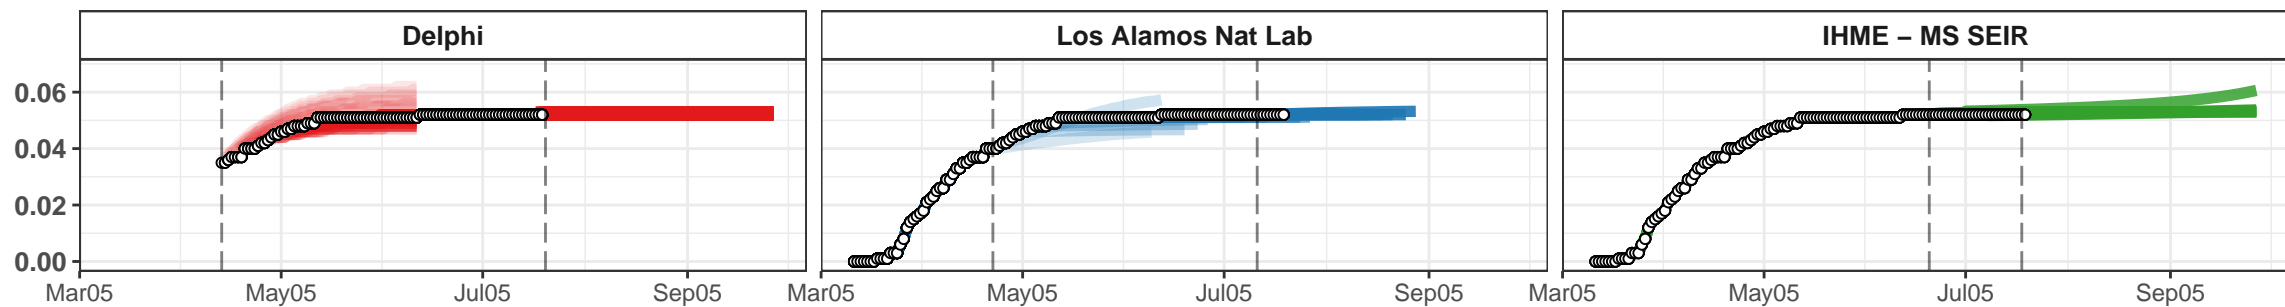

## All Cumulative Errors

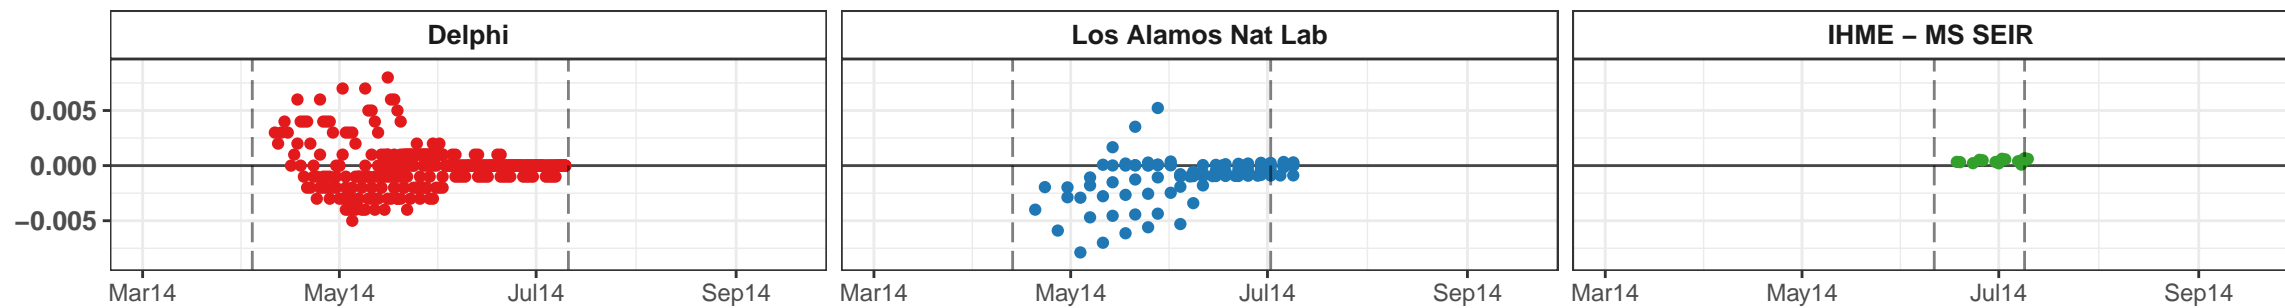

# Equatorial Guinea

## Current Forecast

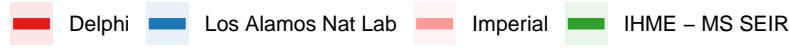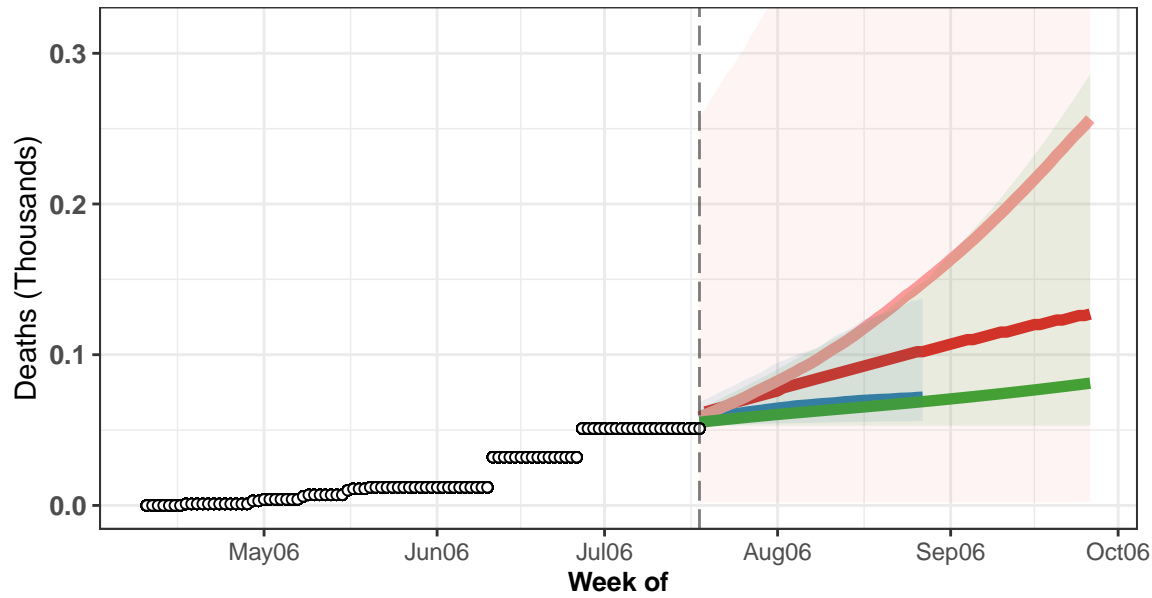

## Cumulative Out-Of-Sample Error (Post Intercept Shift)

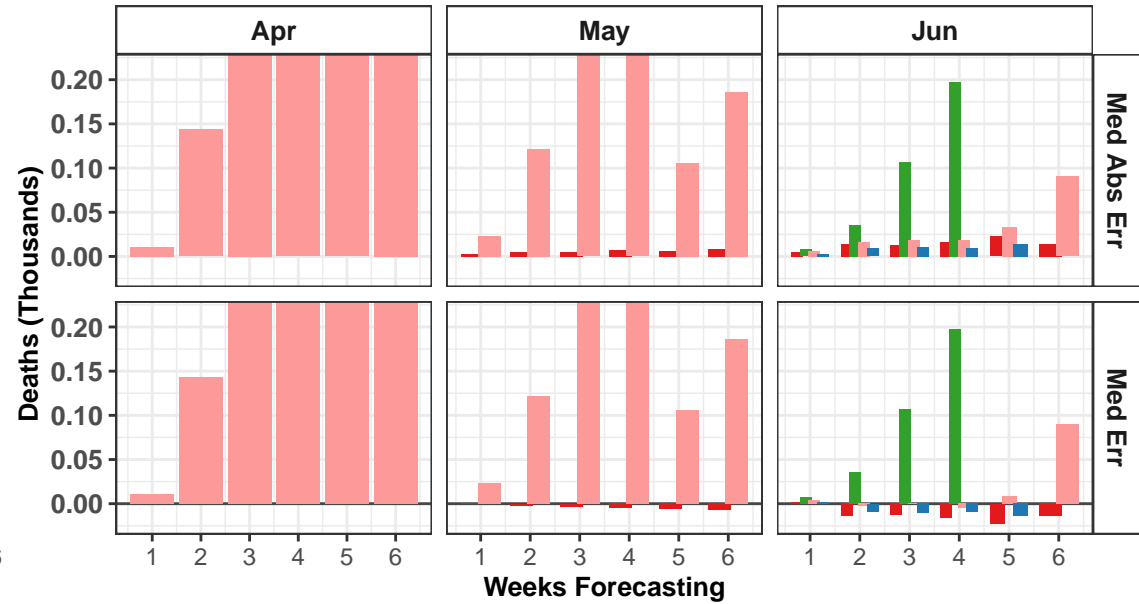

## All Model Versions

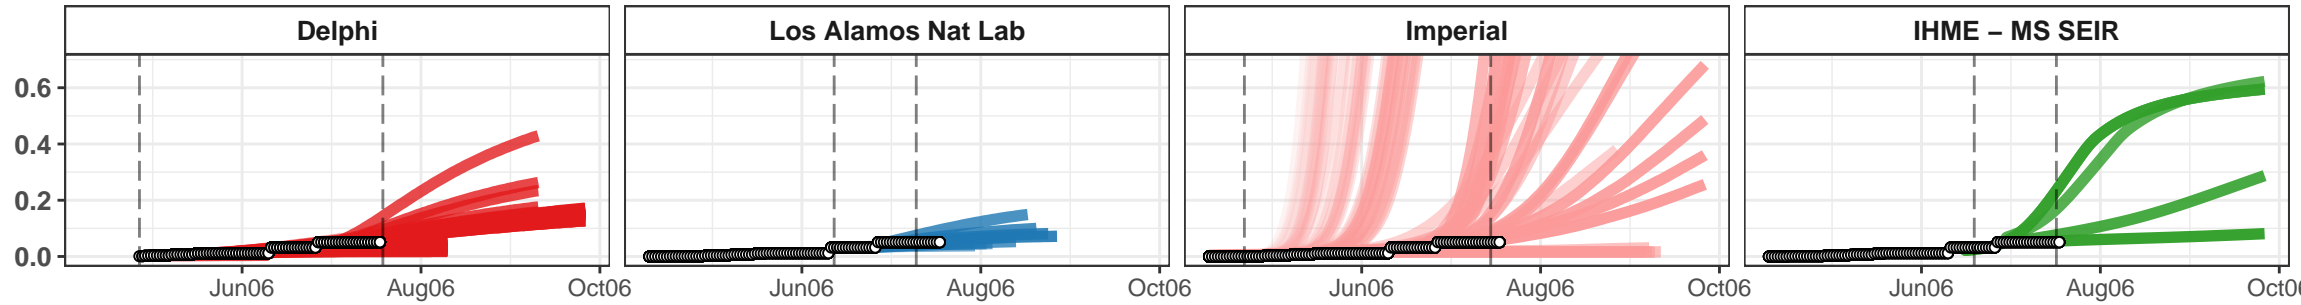

## All Cumulative Errors

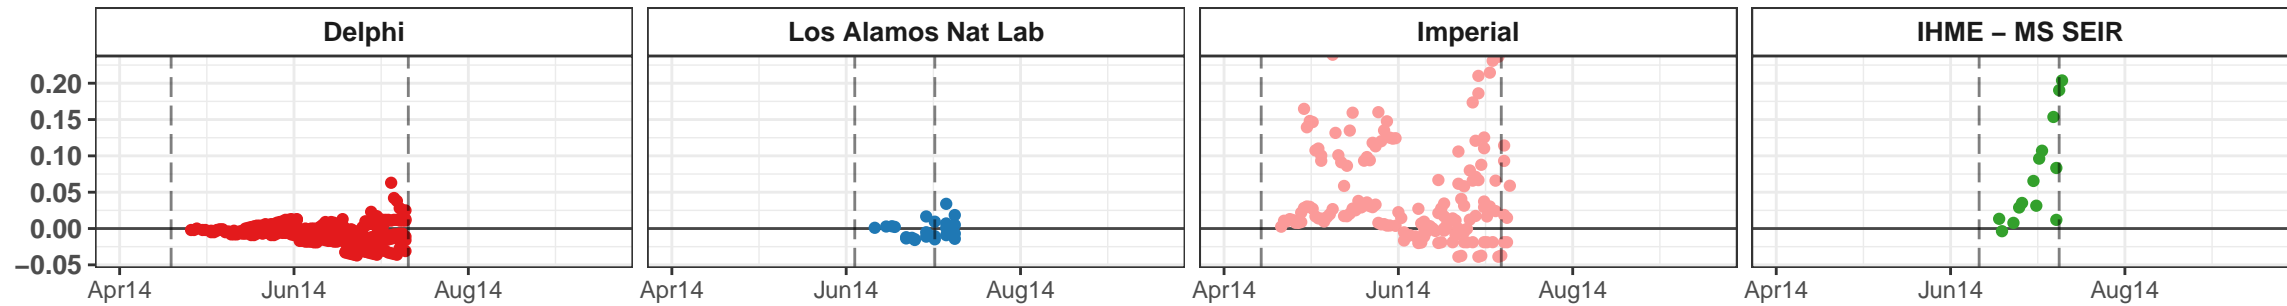

# Congo

## Current Forecast

Delphi Los Alamos Nat Lab Imperial IHME – MS SEIR

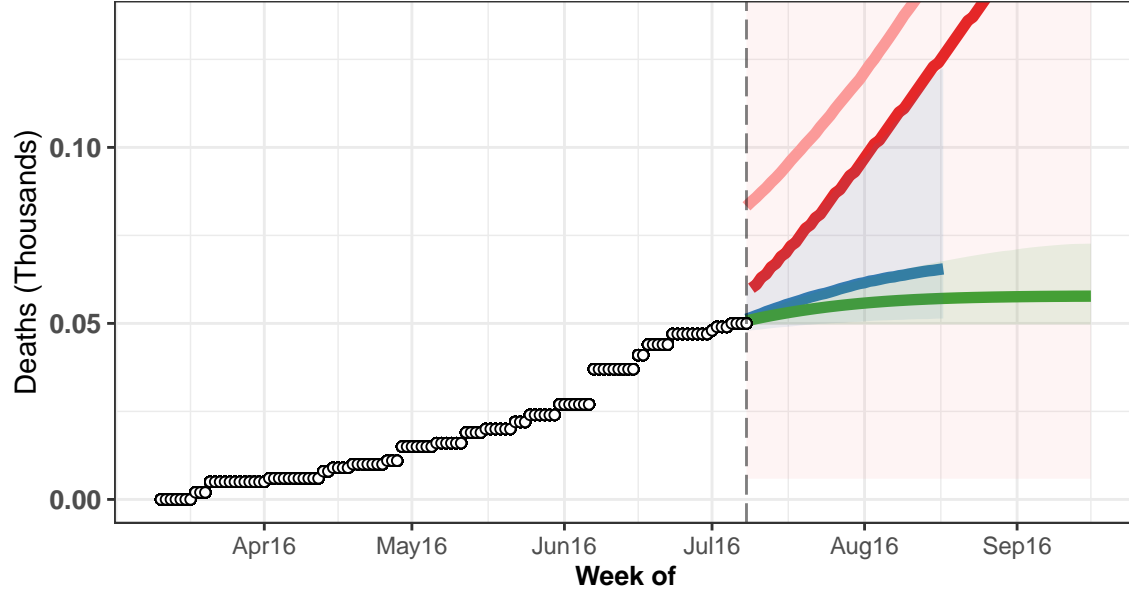

## Cumulative Out-Of-Sample Error (Post Intercept Shift)

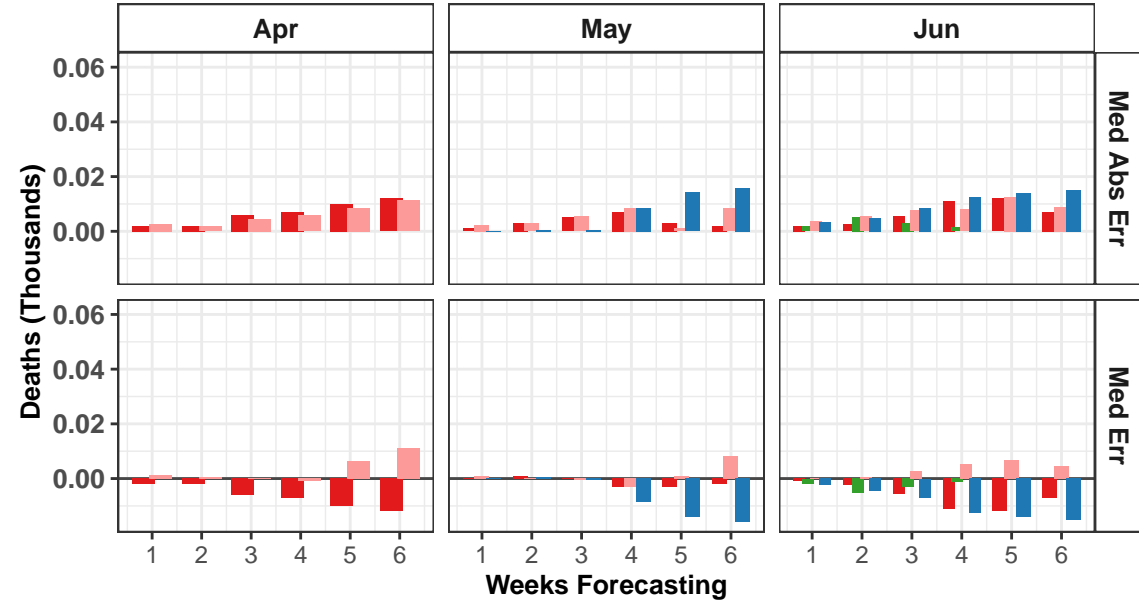

## All Model Versions

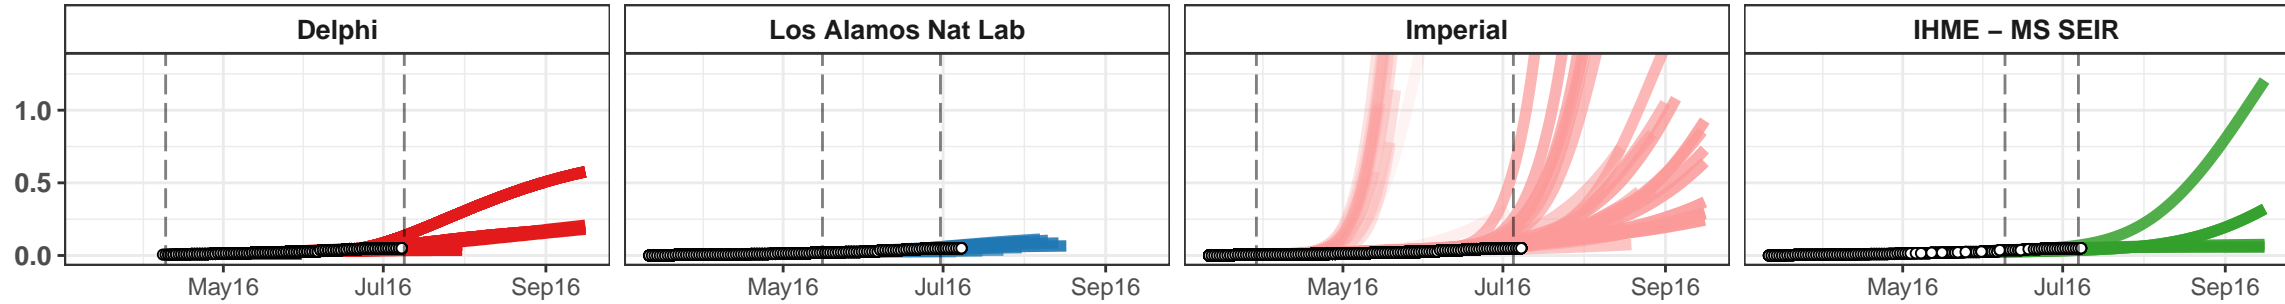

## All Cumulative Errors

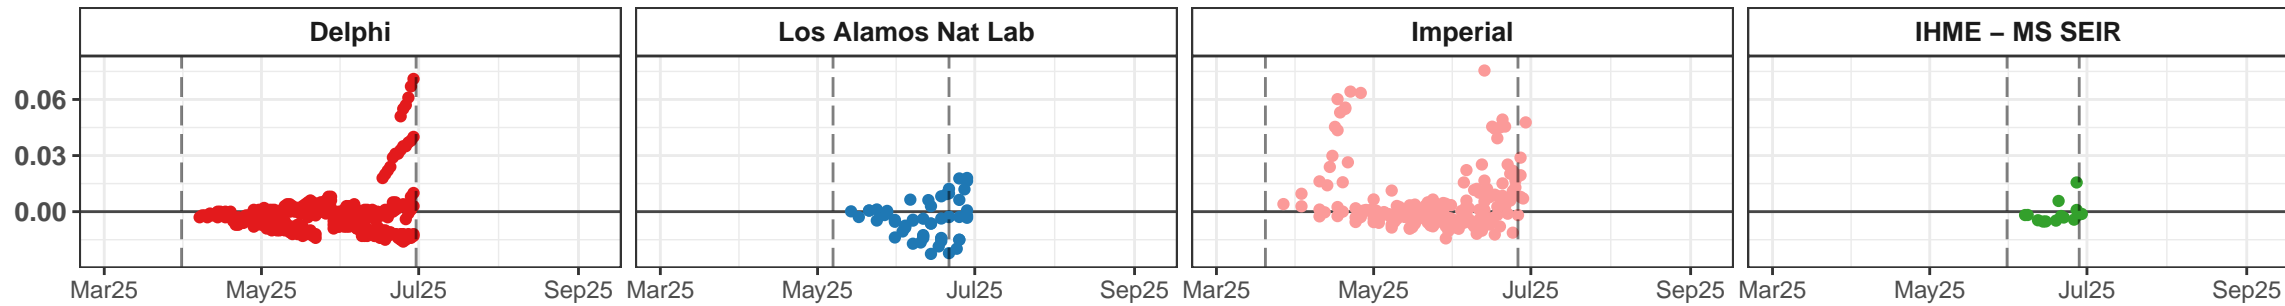

# Tunisia

## Current Forecast

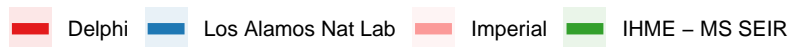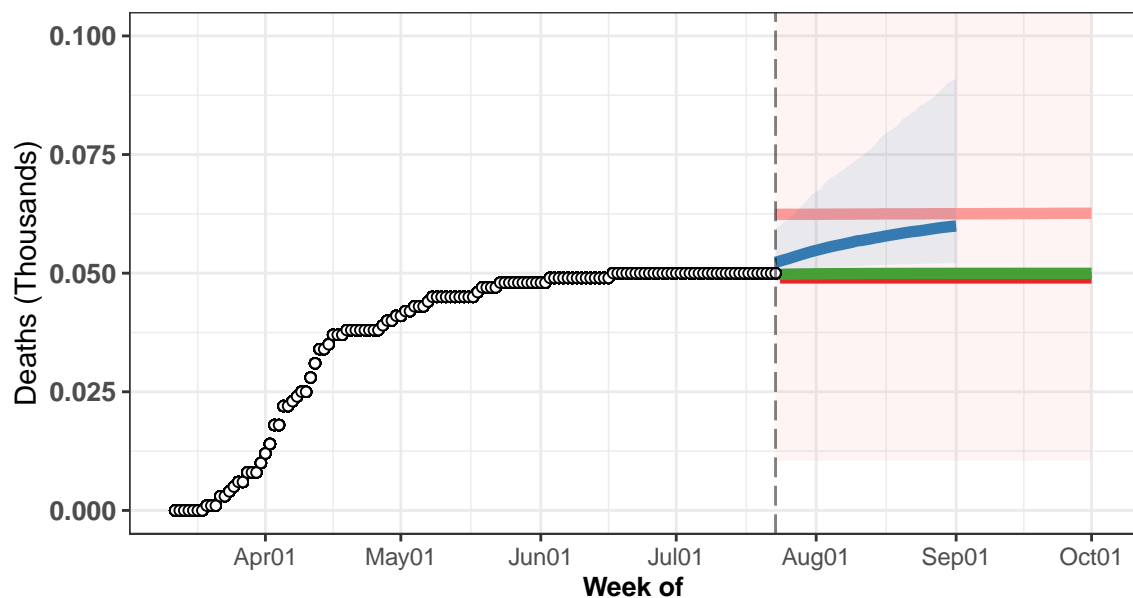

## Cumulative Out-Of-Sample Error (Post Intercept Shift)

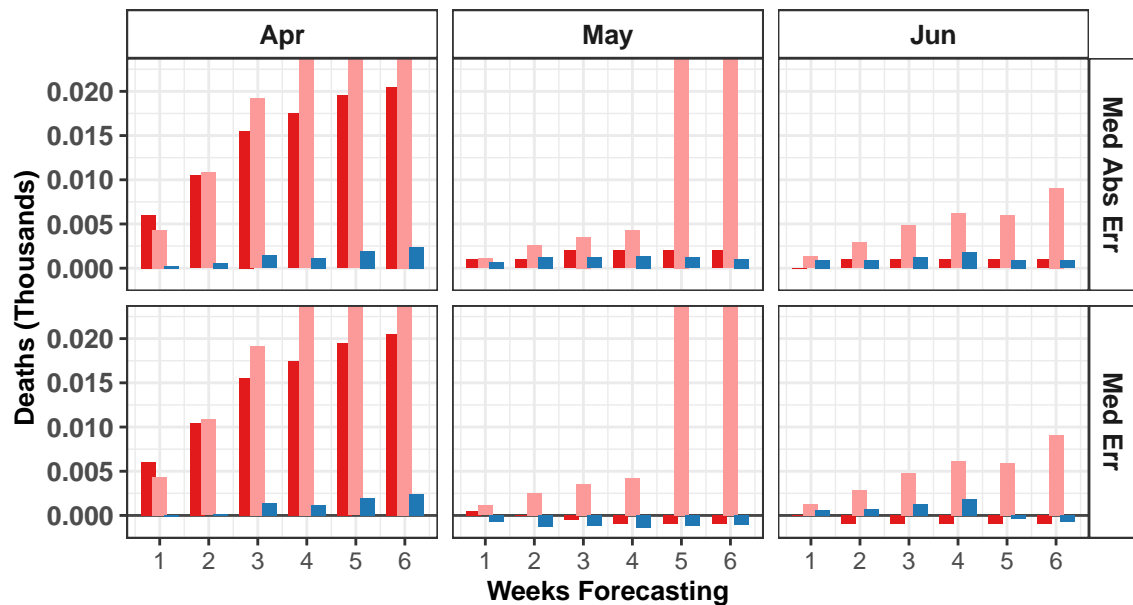

## All Model Versions

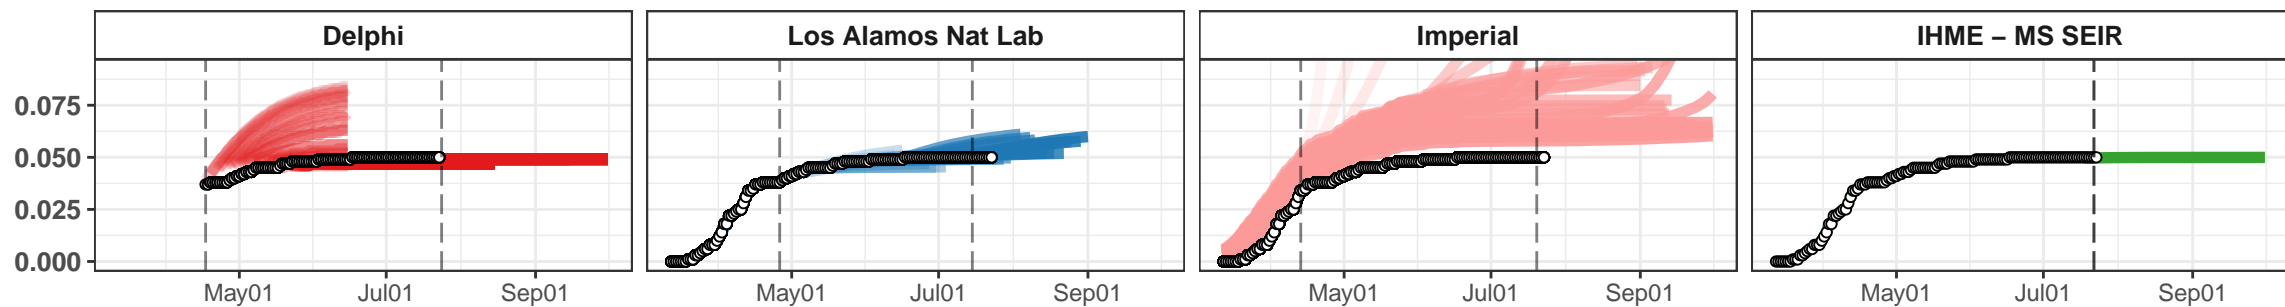

## All Cumulative Errors

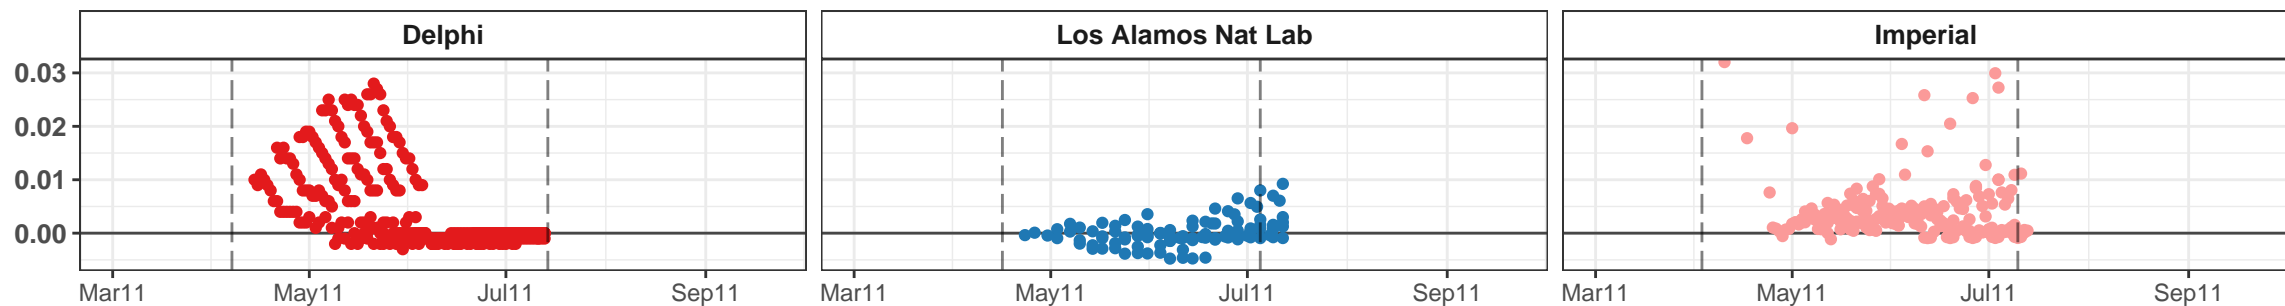

# Gabon

## Current Forecast

Delphi Los Alamos Nat Lab Imperial IHME – MS SEIR

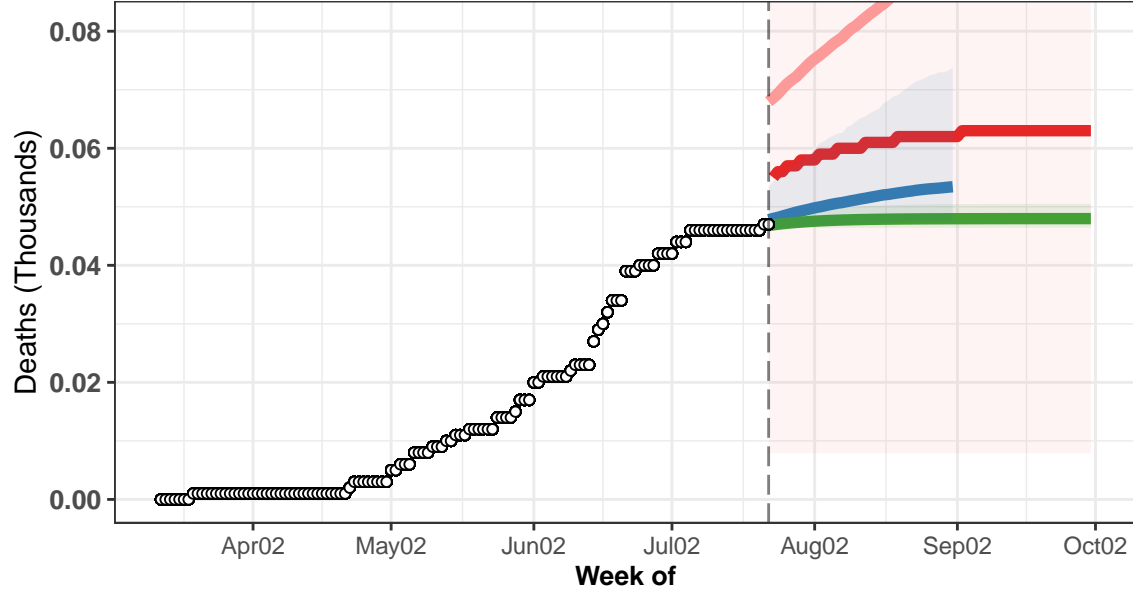

## Cumulative Out-Of-Sample Error (Post Intercept Shift)

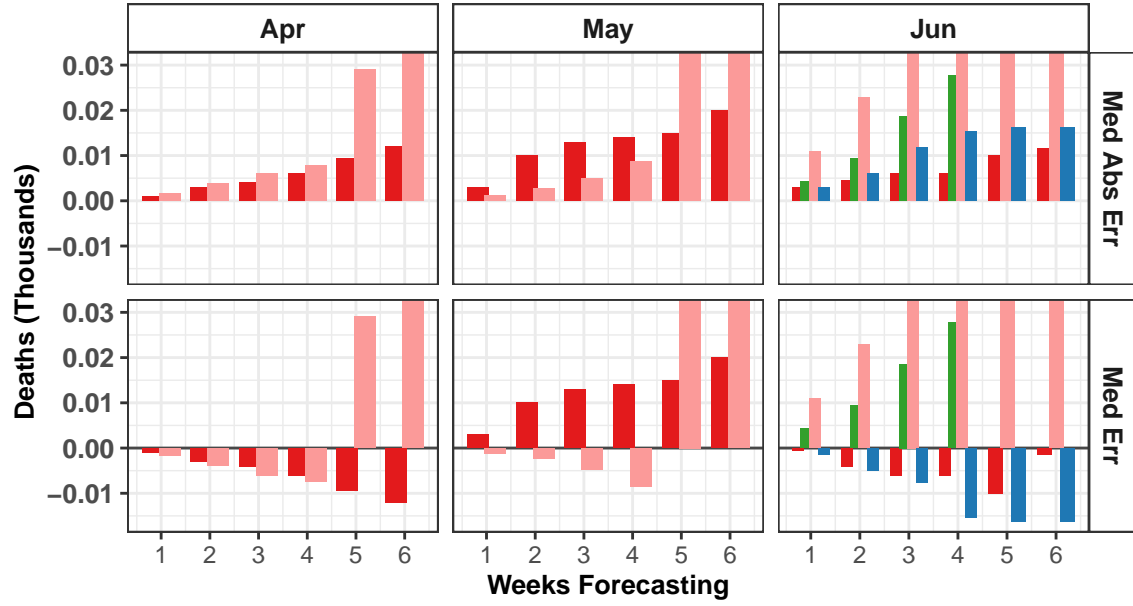

## All Model Versions

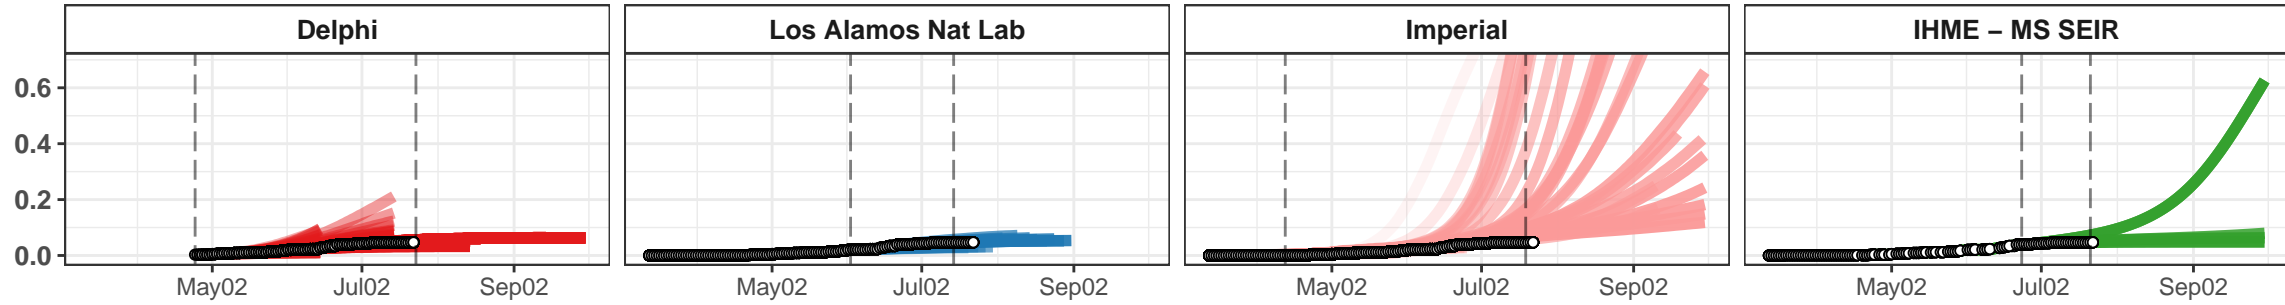

## All Cumulative Errors

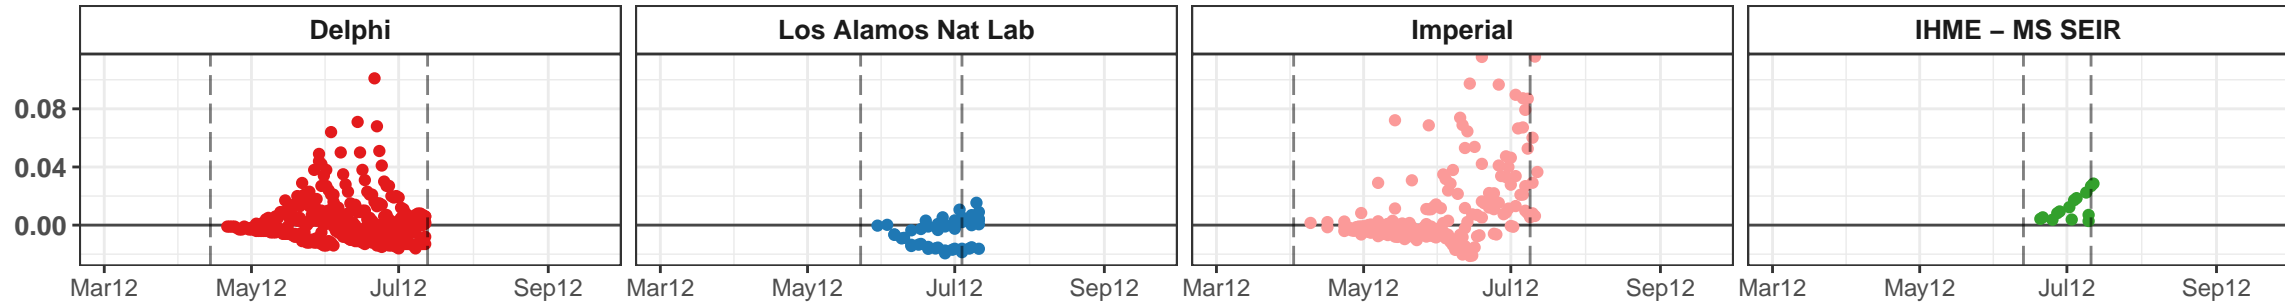

# South Sudan

## Current Forecast

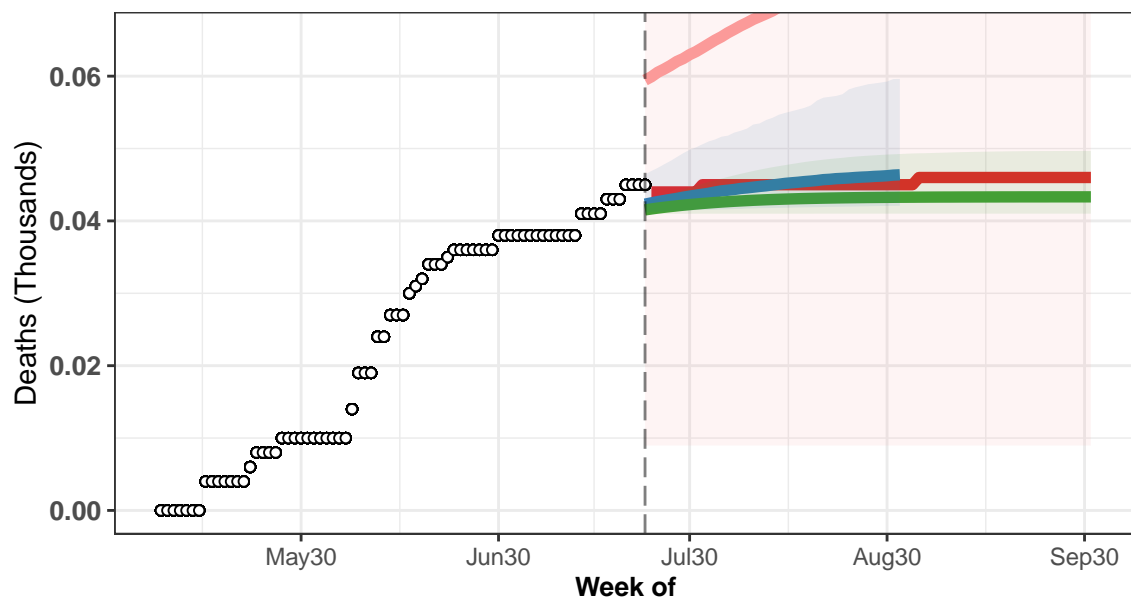

## Cumulative Out-Of-Sample Error (Post Intercept Shift)

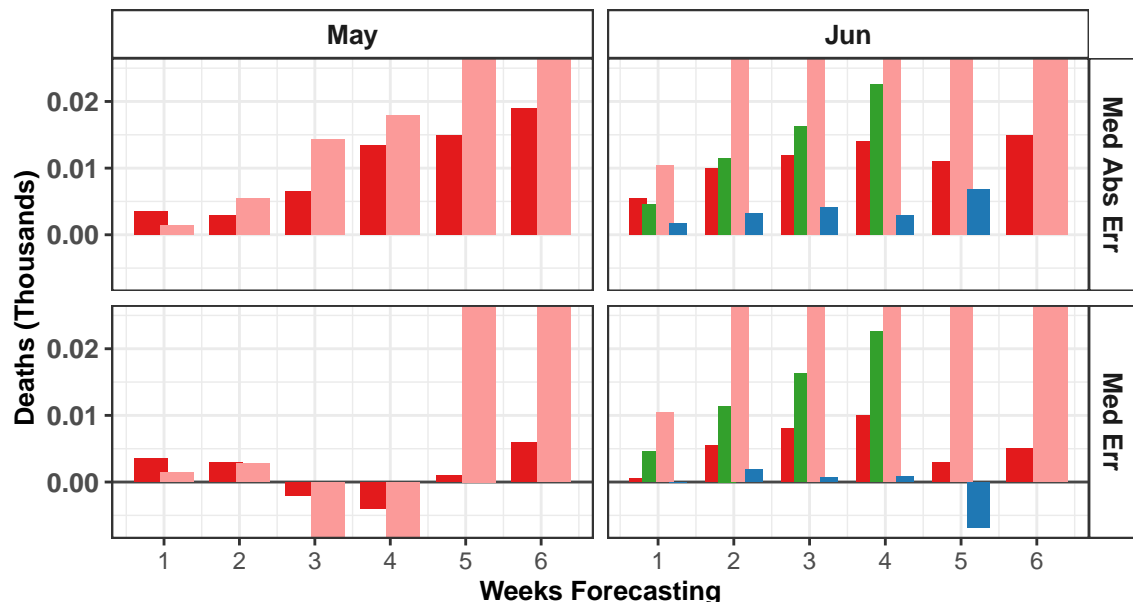

## All Model Versions

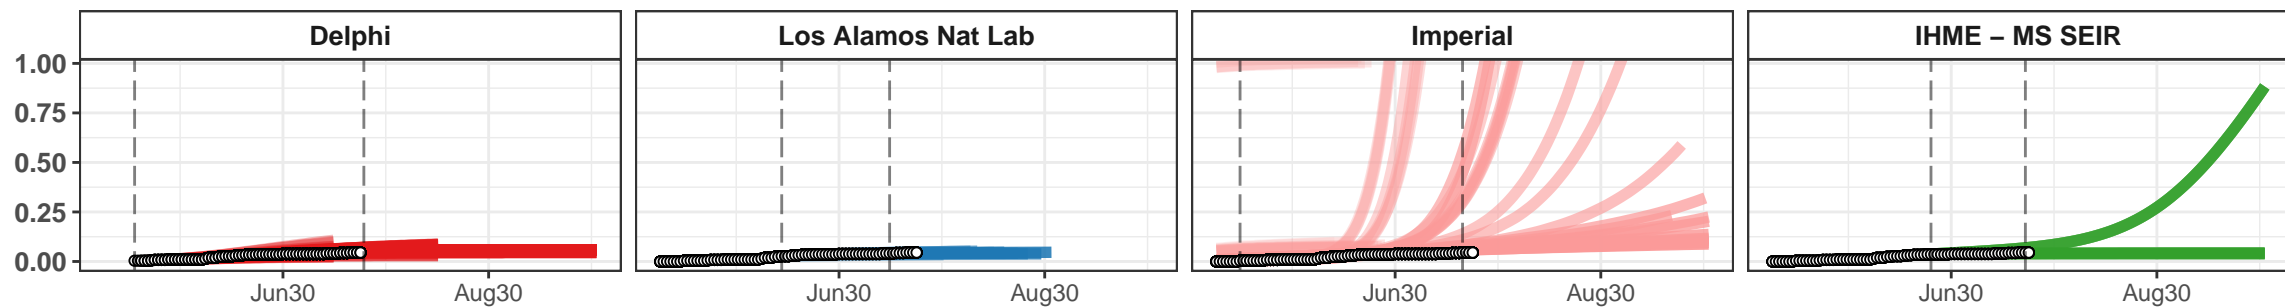

## All Cumulative Errors

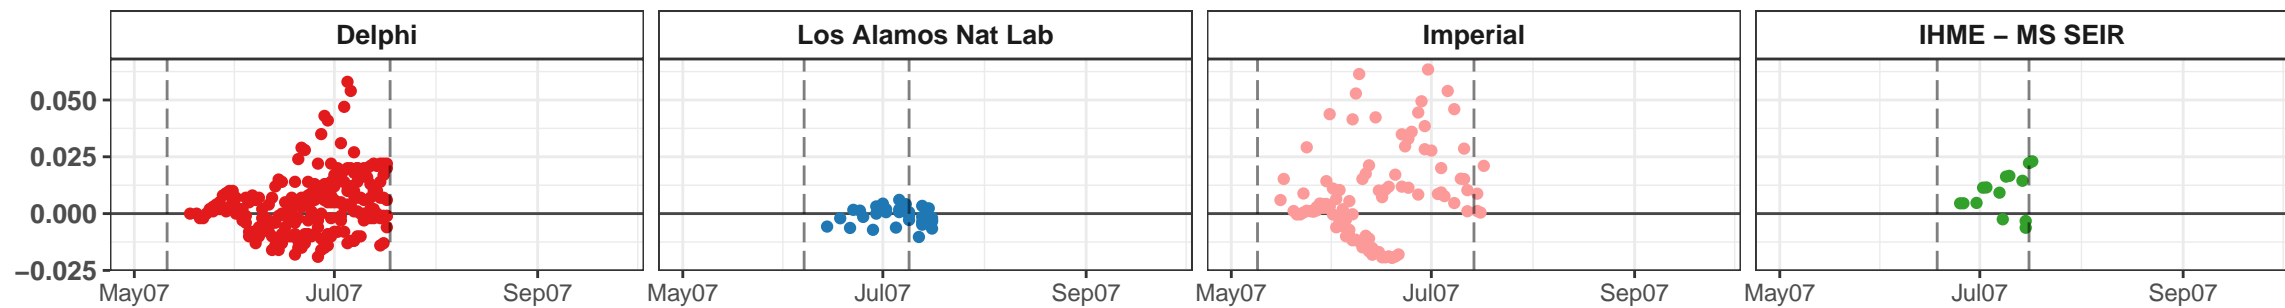

# Lebanon

## Current Forecast

Delphi Los Alamos Nat Lab Imperial IHME – MS SEIR

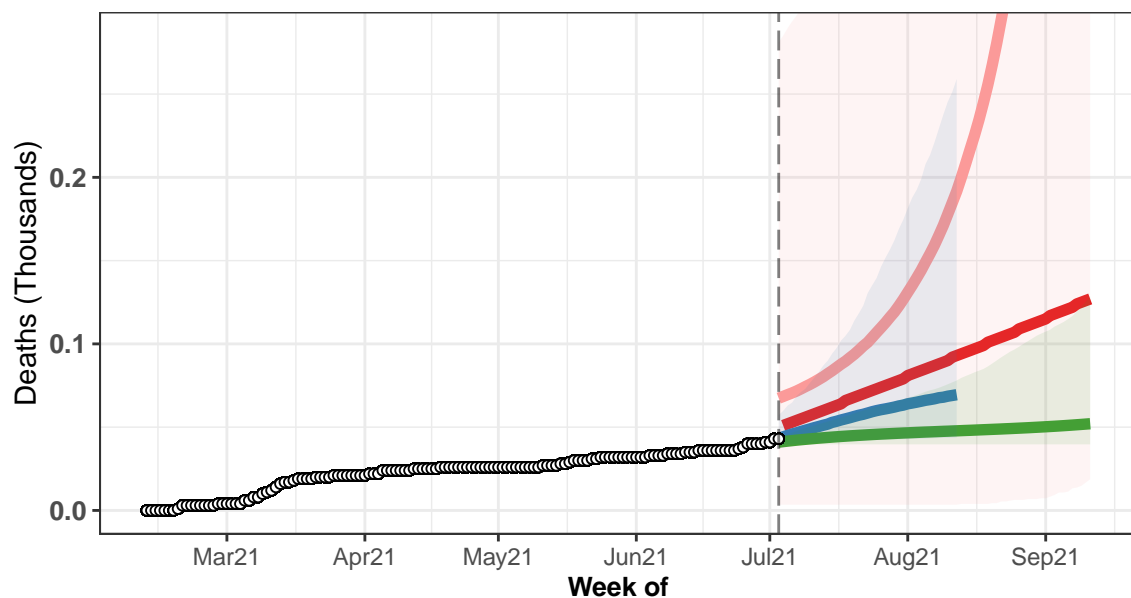

## Cumulative Out-Of-Sample Error (Post Intercept Shift)

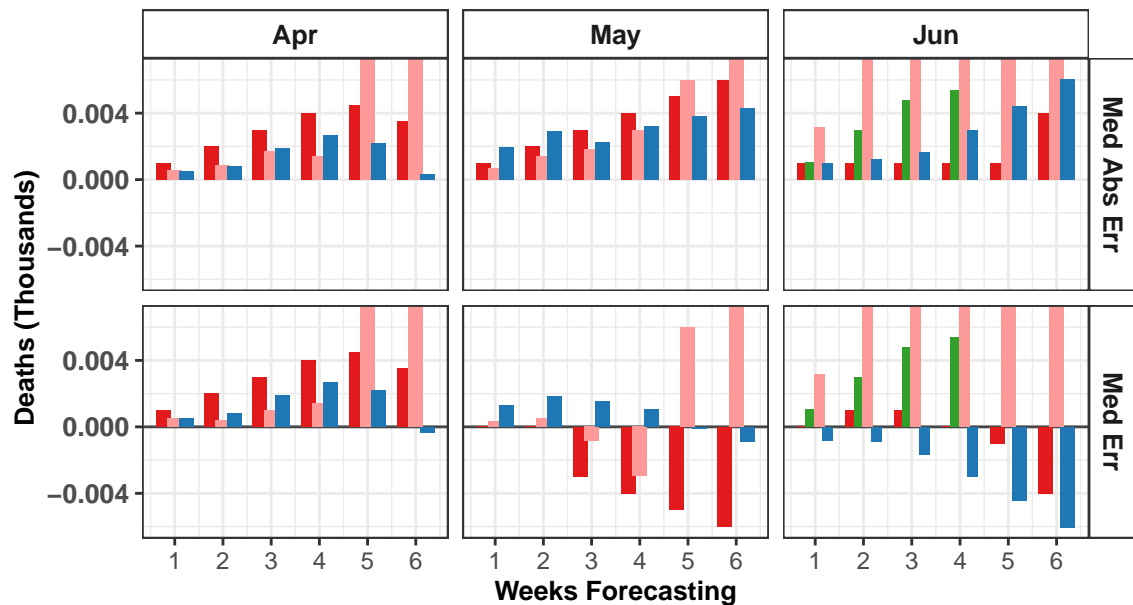

## All Model Versions

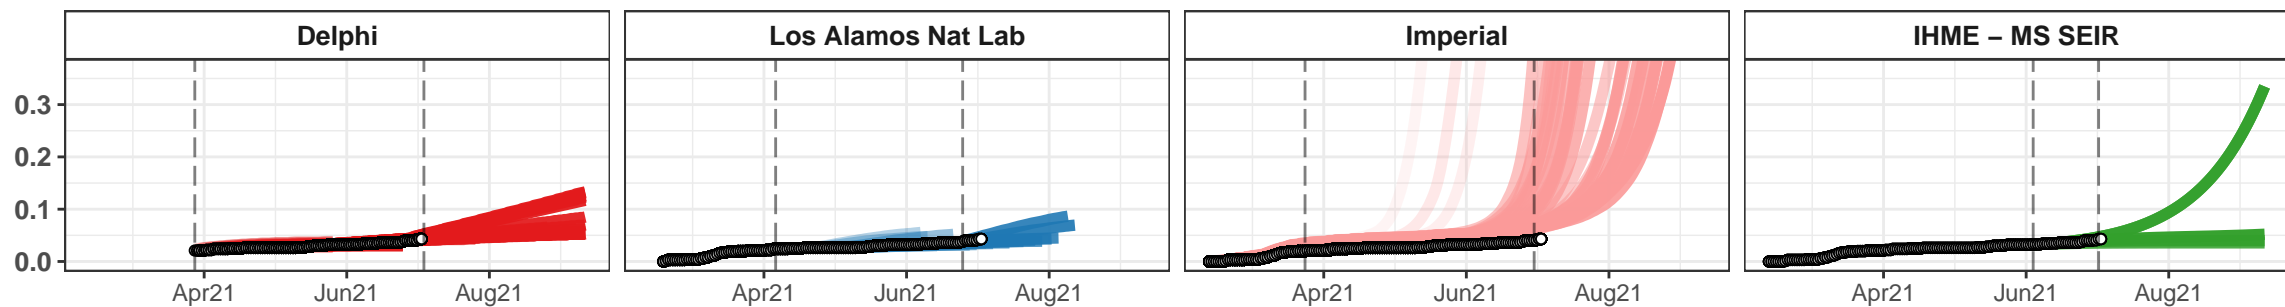

## All Cumulative Errors

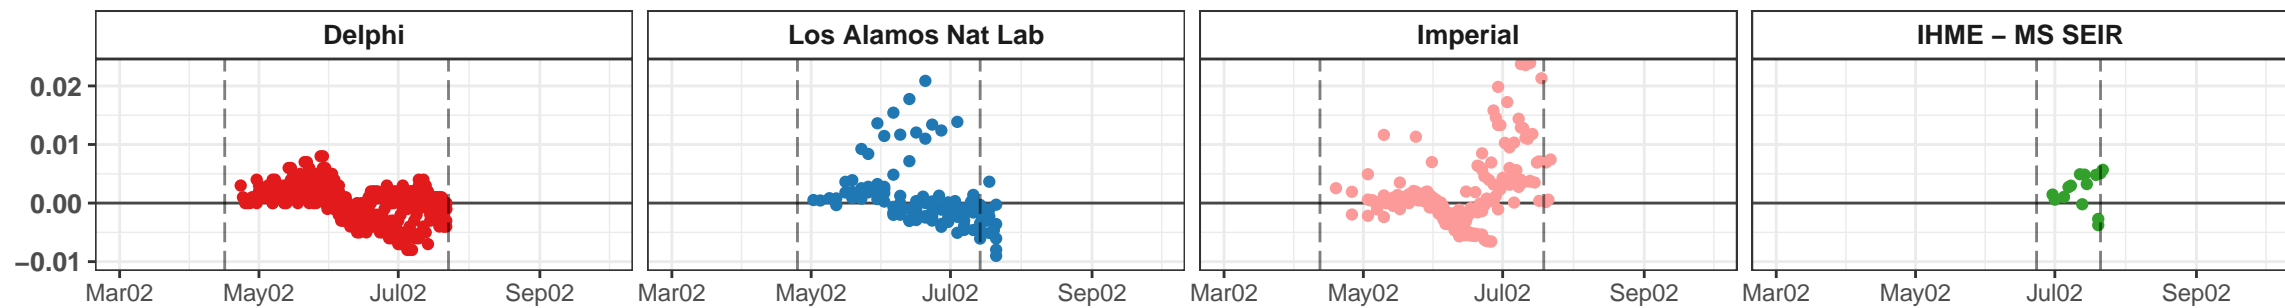

# Montana

## Current Forecast

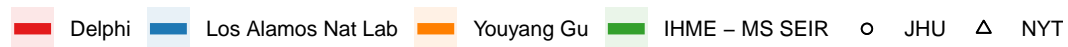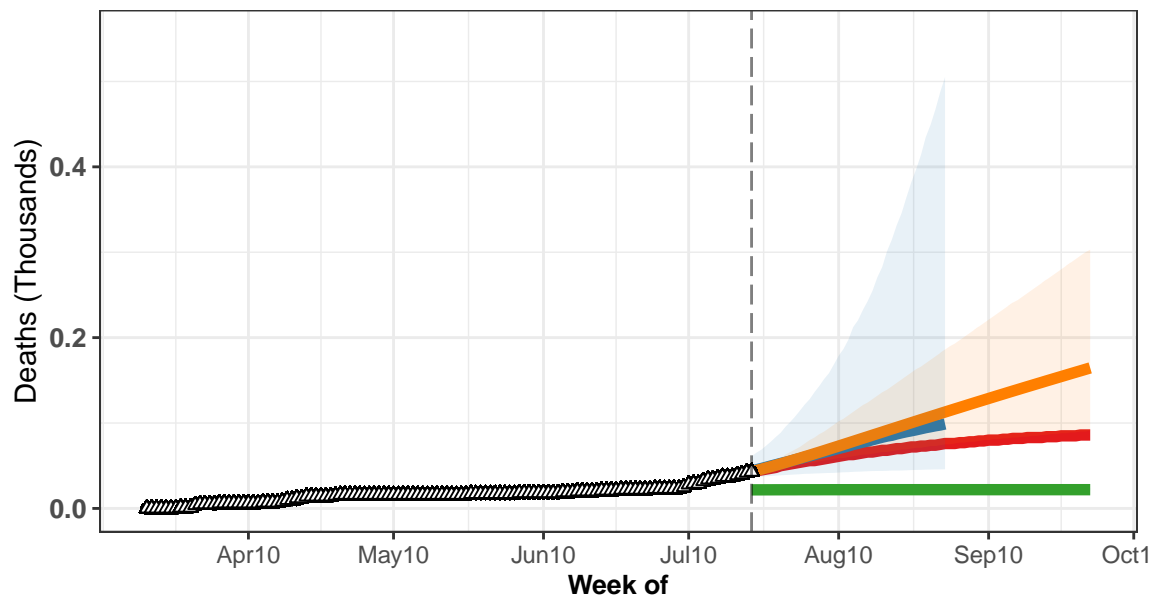

## Cumulative Out-Of-Sample Error (Post Intercept Shift)

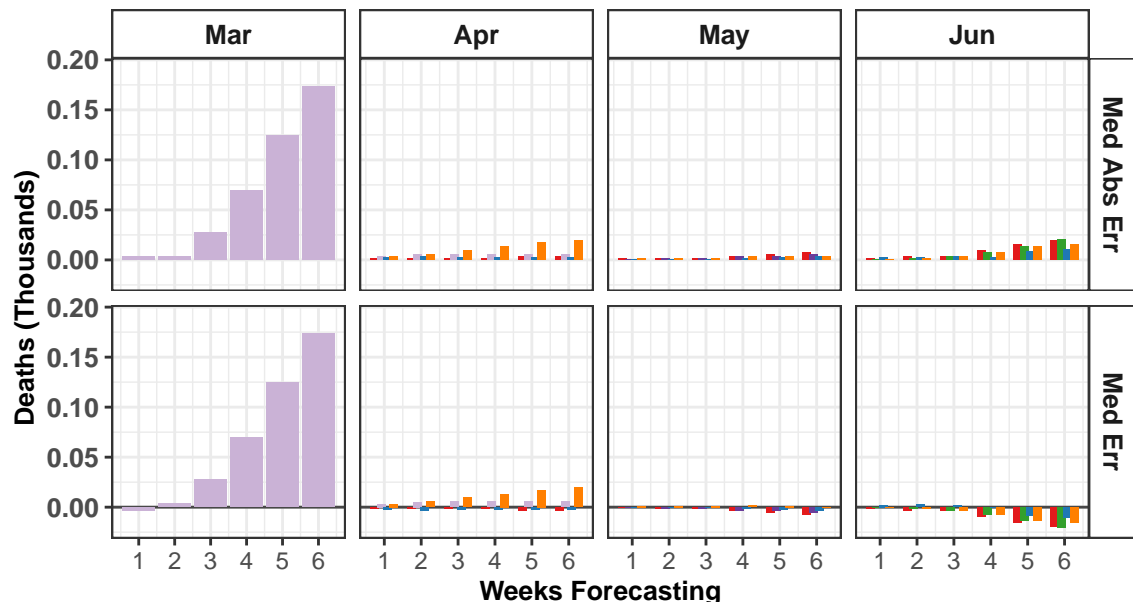

## All Model Versions

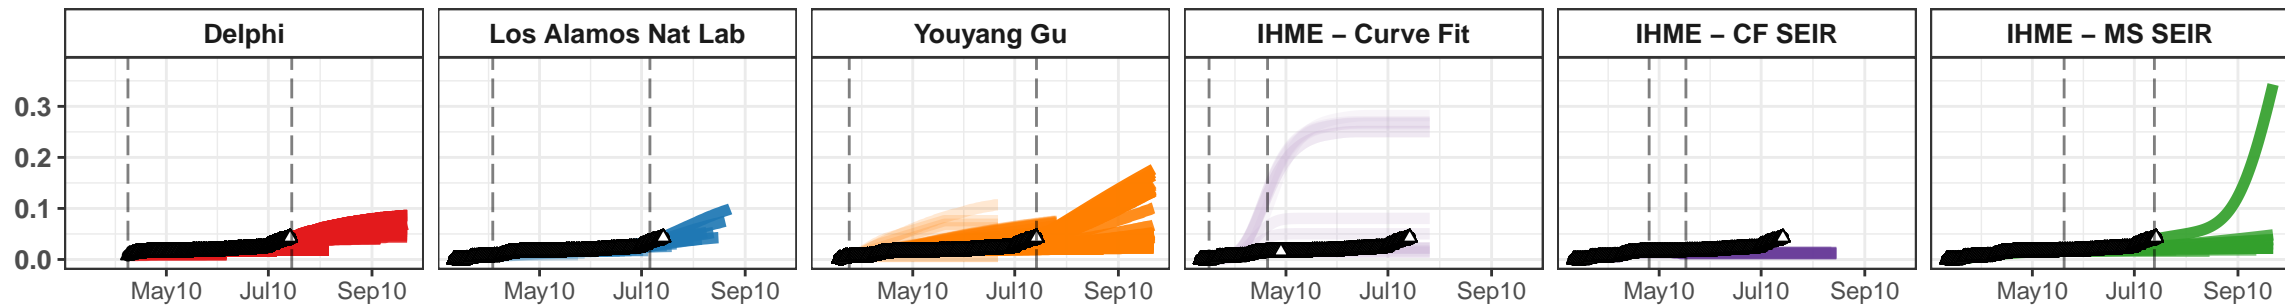

## All Cumulative Errors

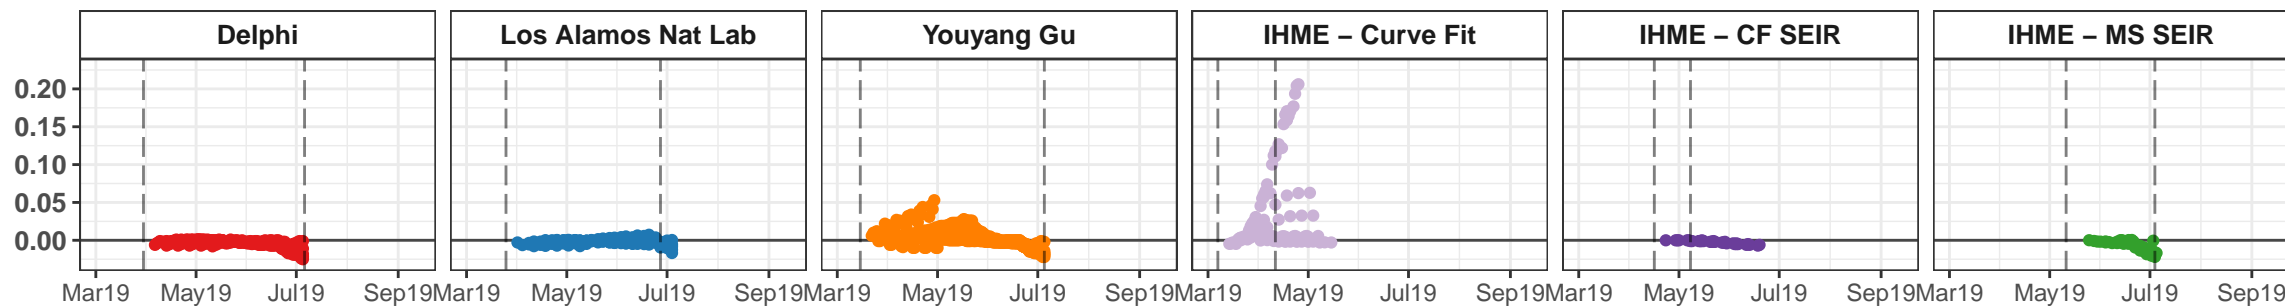



# Nepal

## Current Forecast

Delphi Los Alamos Nat Lab Imperial IHME – MS SEIR

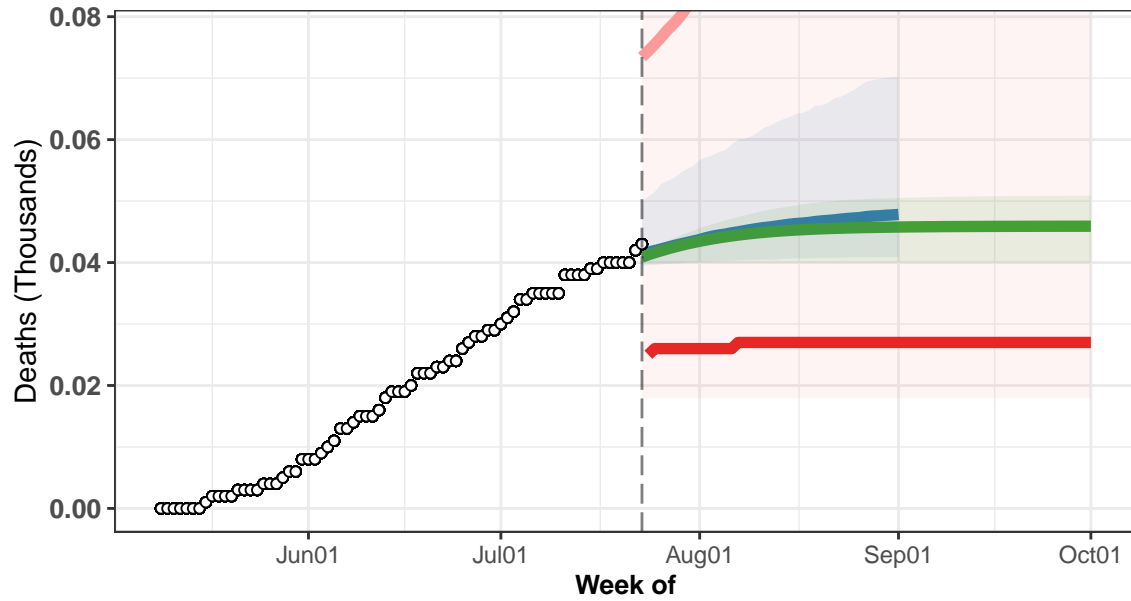

## Cumulative Out-Of-Sample Error (Post Intercept Shift)

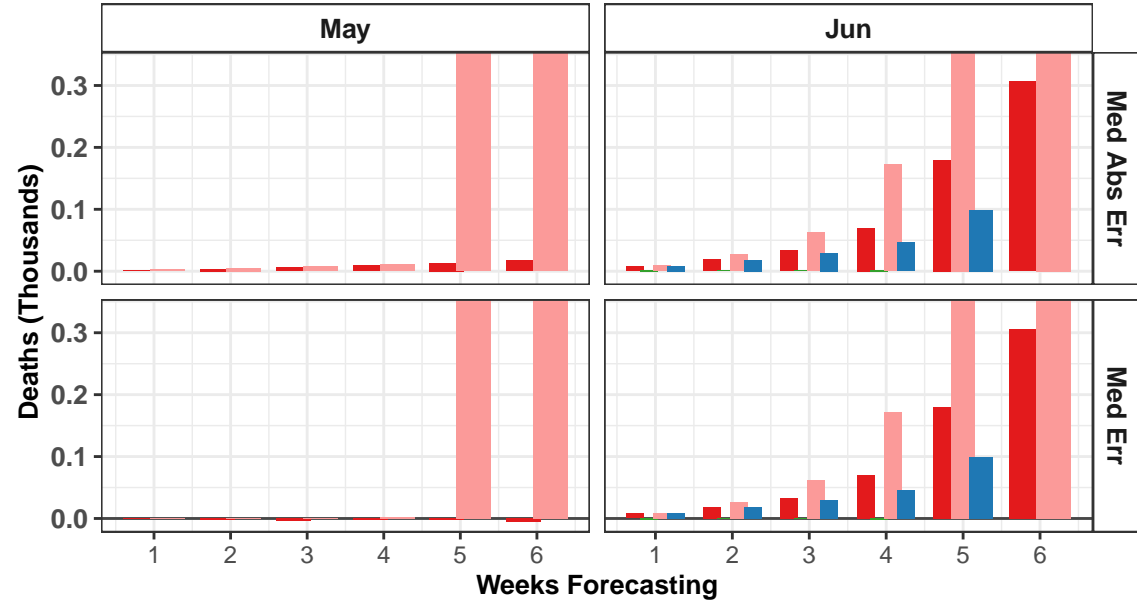

## All Model Versions

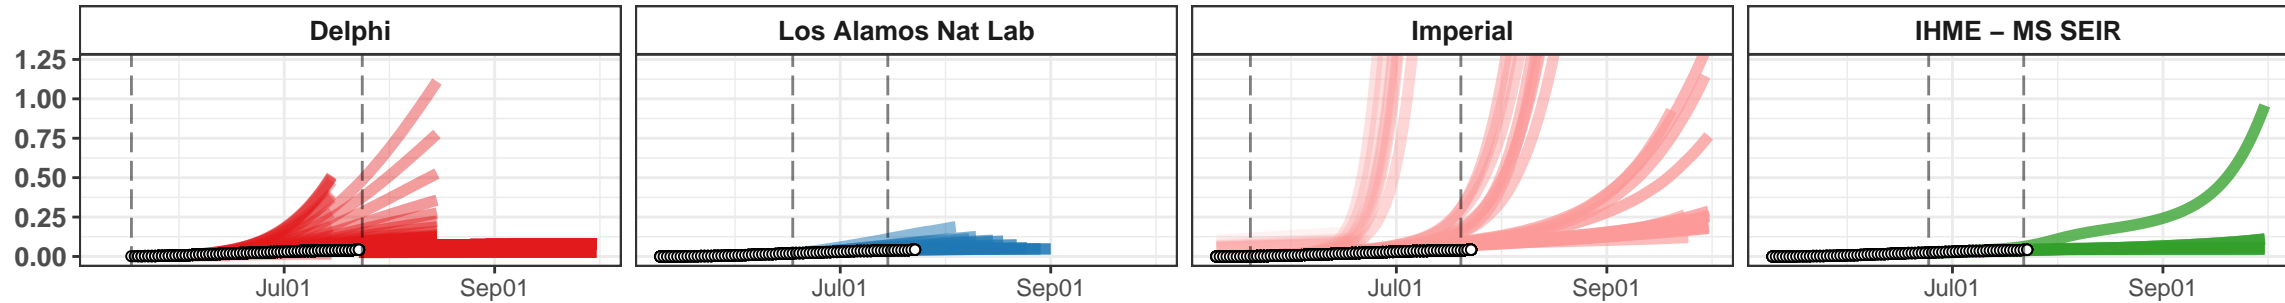

## All Cumulative Errors

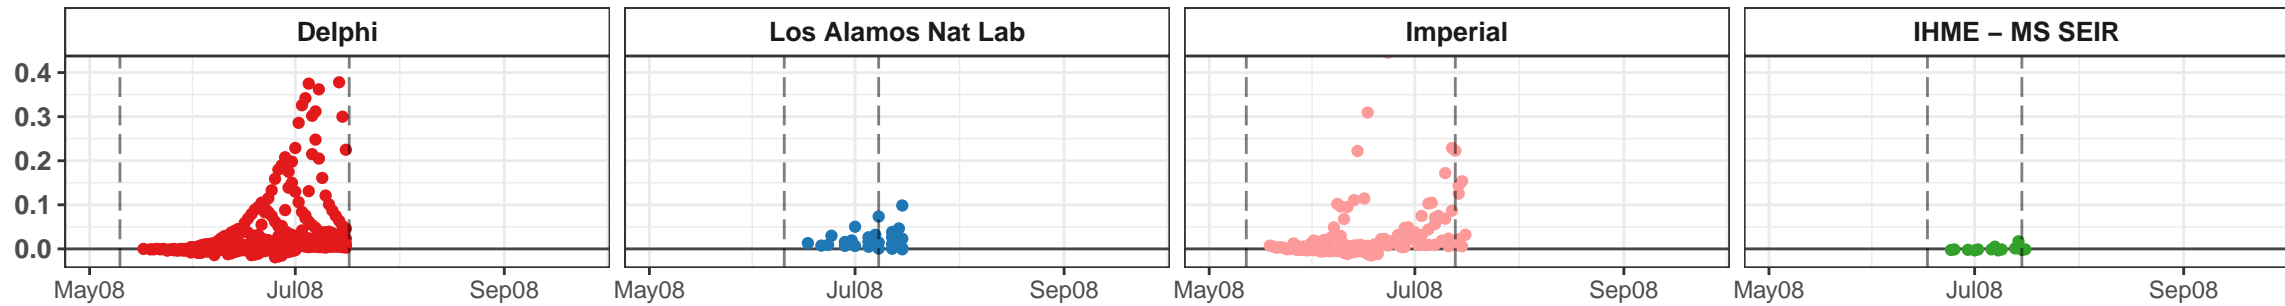

# Guinea

## Current Forecast

Delphi Los Alamos Nat Lab Imperial IHME – MS SEIR

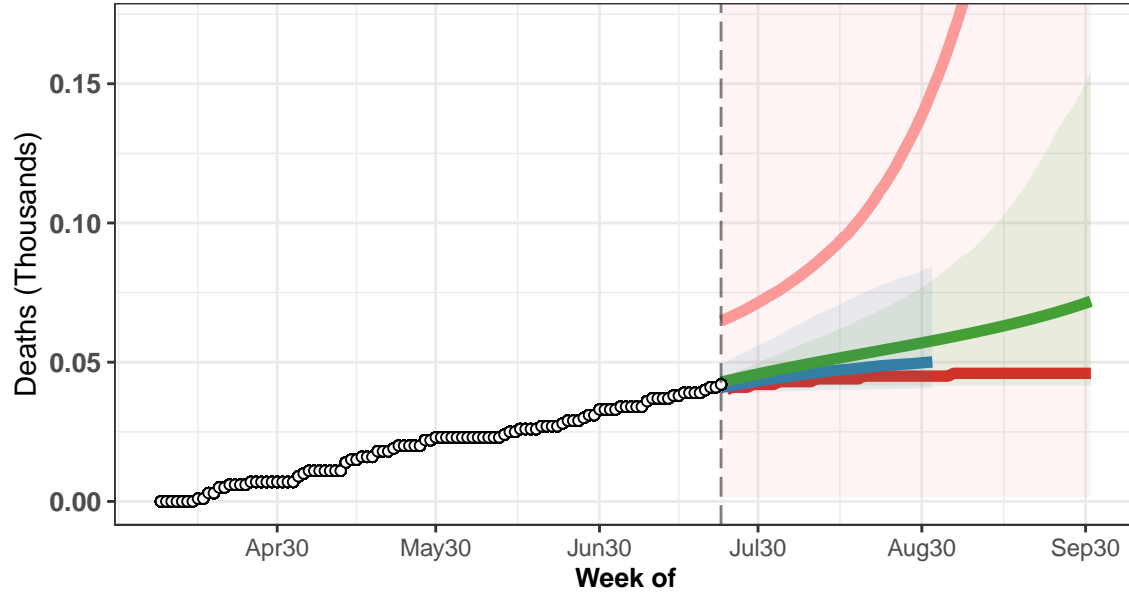

## Cumulative Out-Of-Sample Error (Post Intercept Shift)

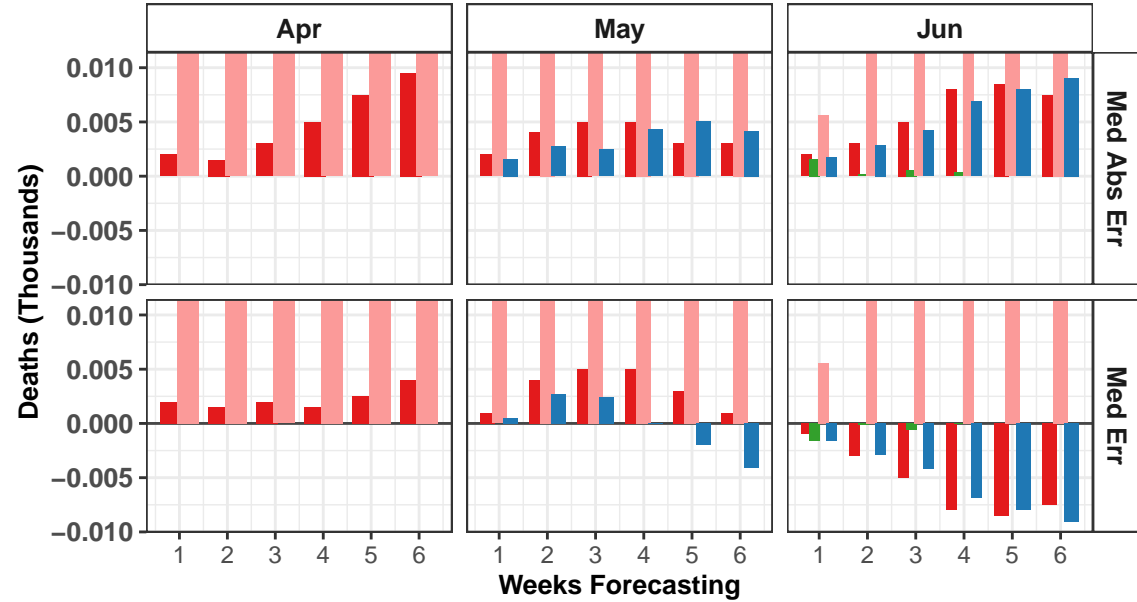

## All Model Versions

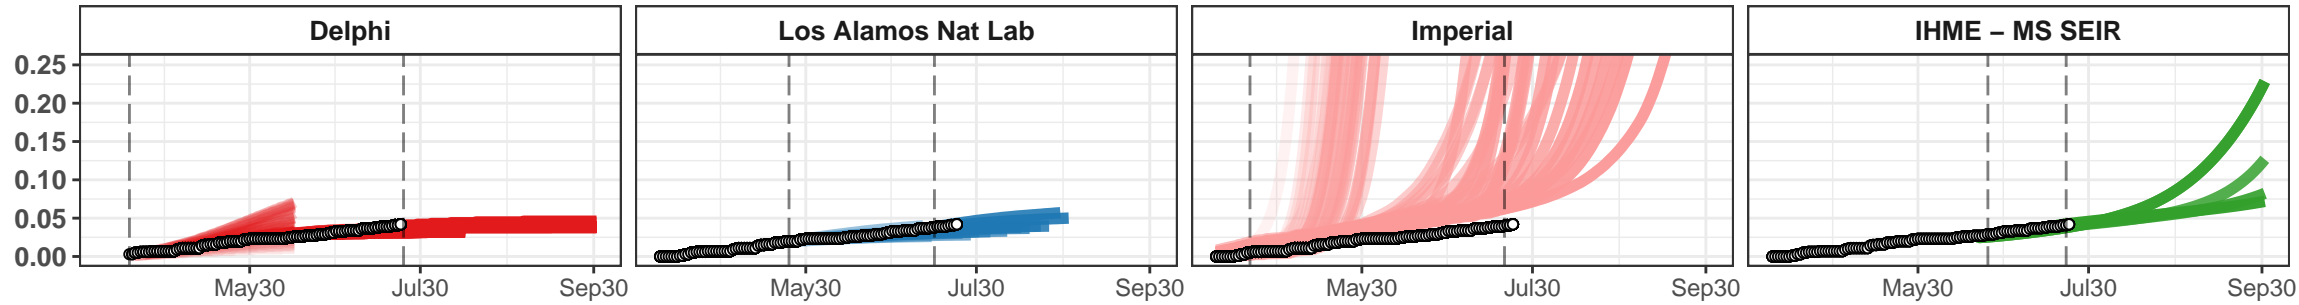

## All Cumulative Errors

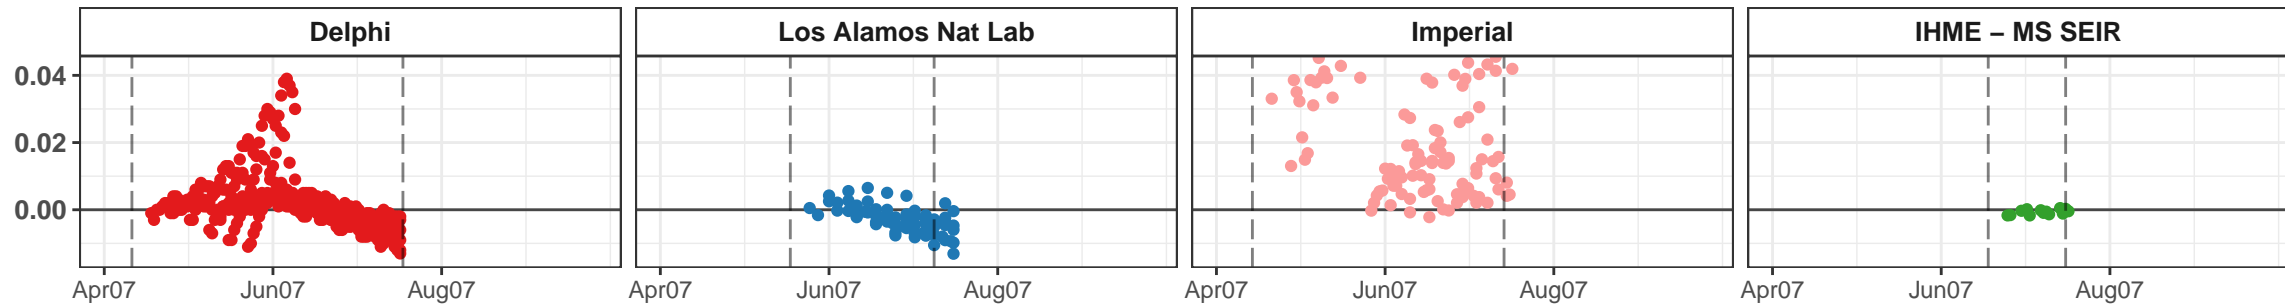

# Montenegro

## Current Forecast

Delphi Los Alamos Nat Lab Imperial IHME – MS SEIR

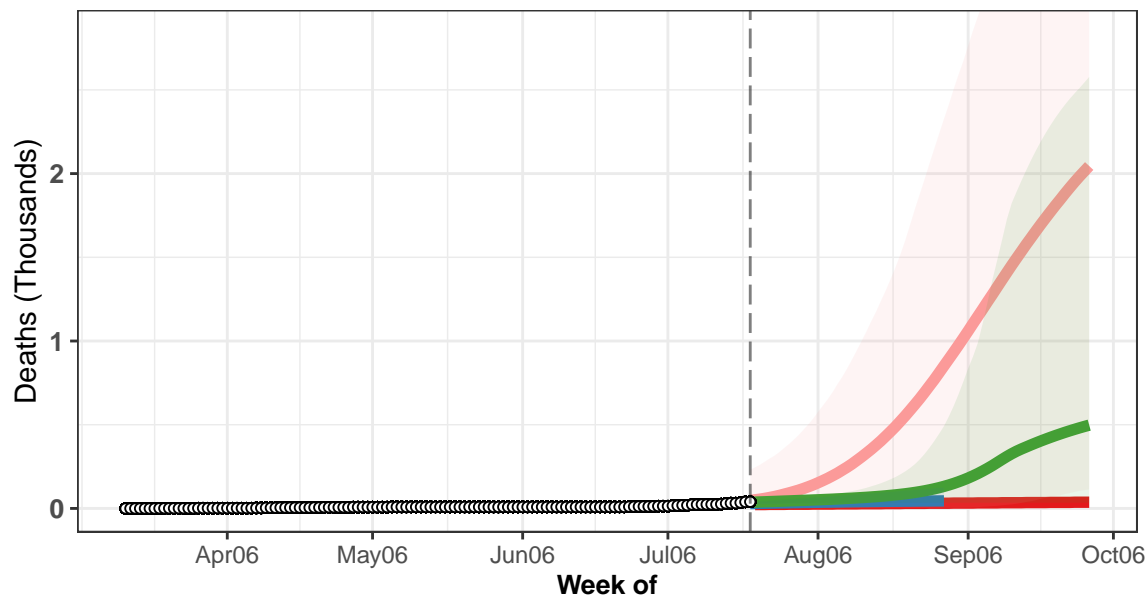

## Cumulative Out-Of-Sample Error (Post Intercept Shift)

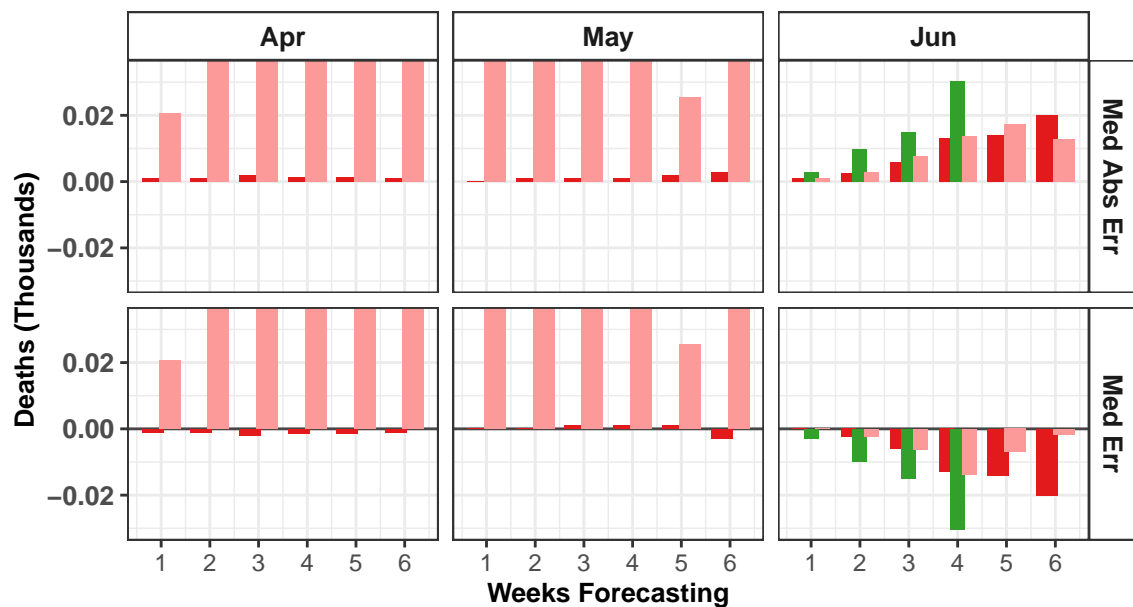

## All Model Versions

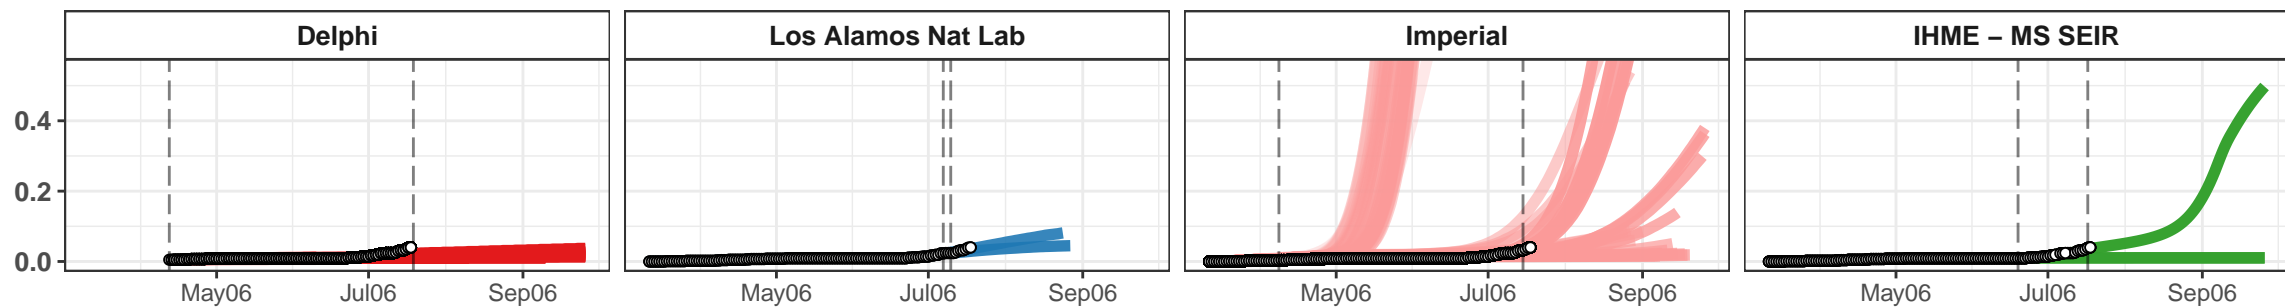

## All Cumulative Errors

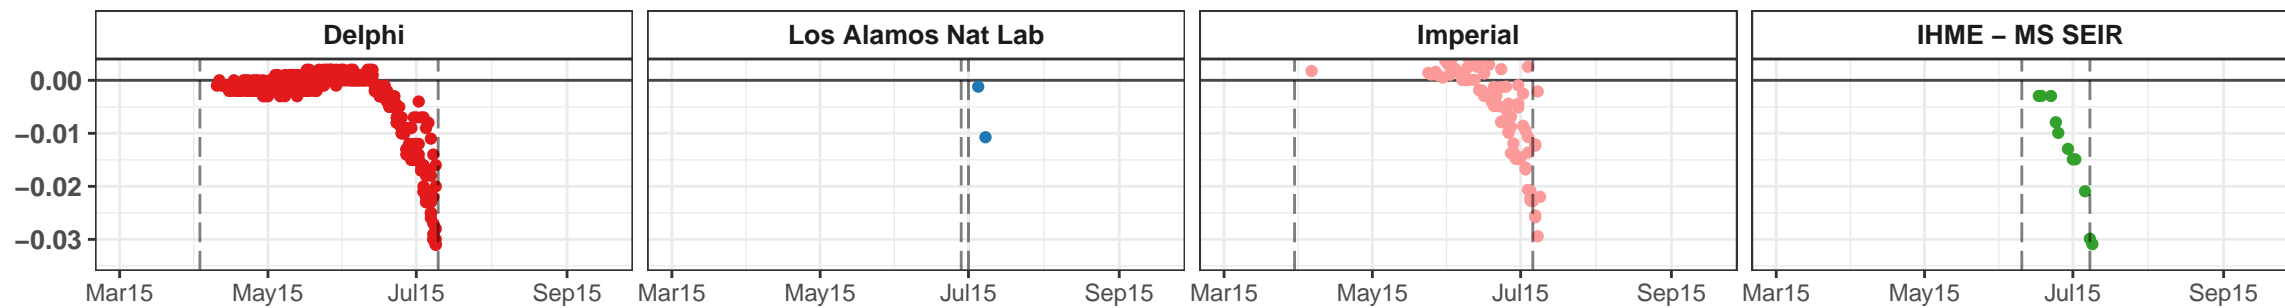

# Paraguay

## Current Forecast

Delphi Los Alamos Nat Lab Imperial IHME – MS SEIR

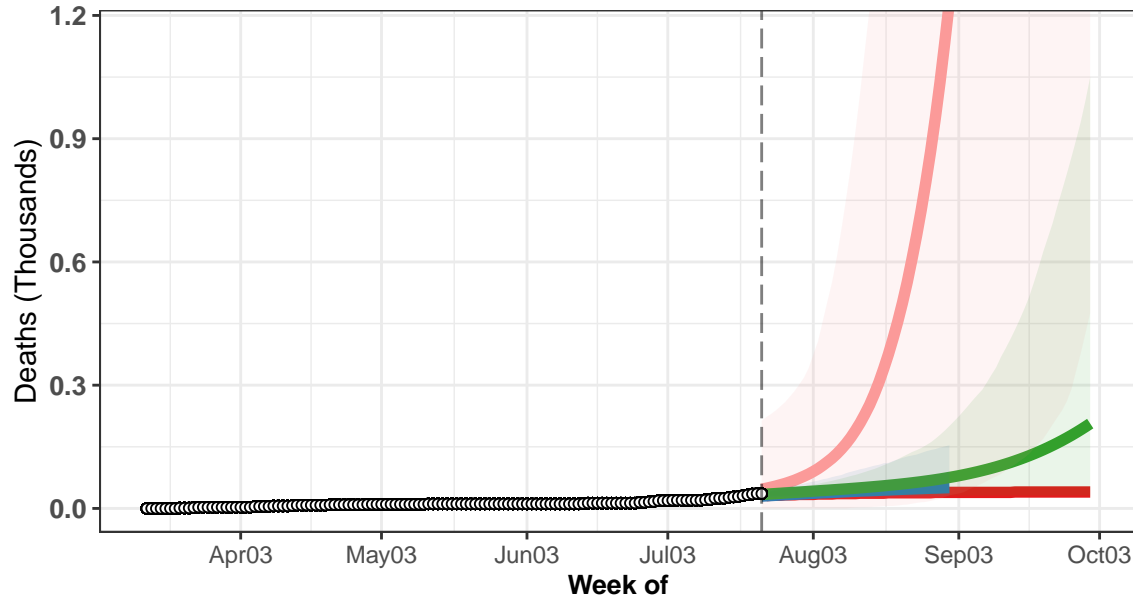

## Cumulative Out-Of-Sample Error (Post Intercept Shift)

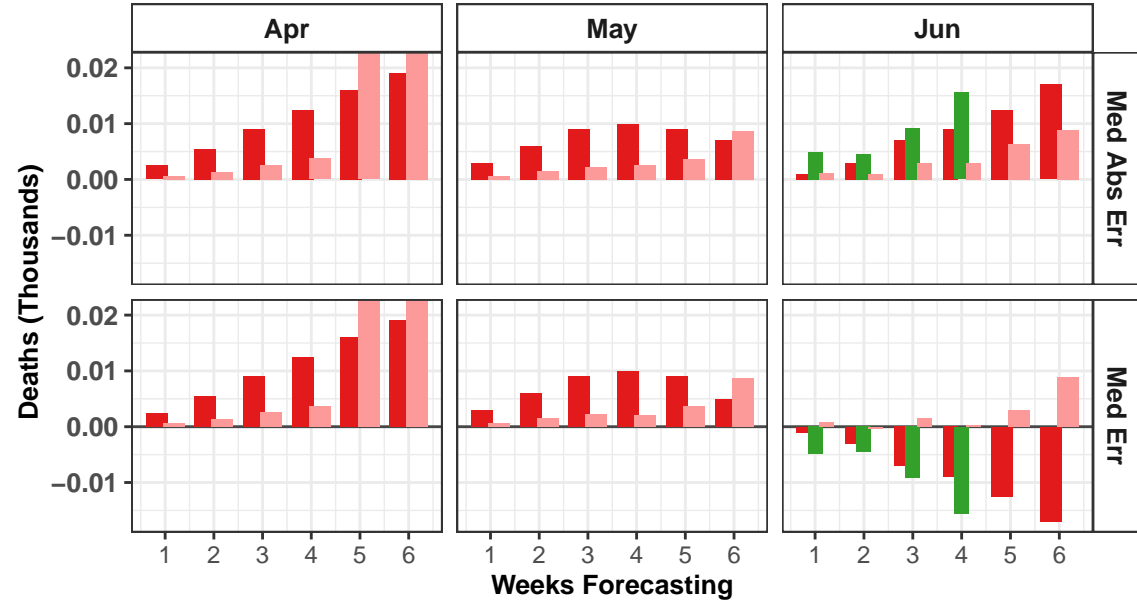

## All Model Versions

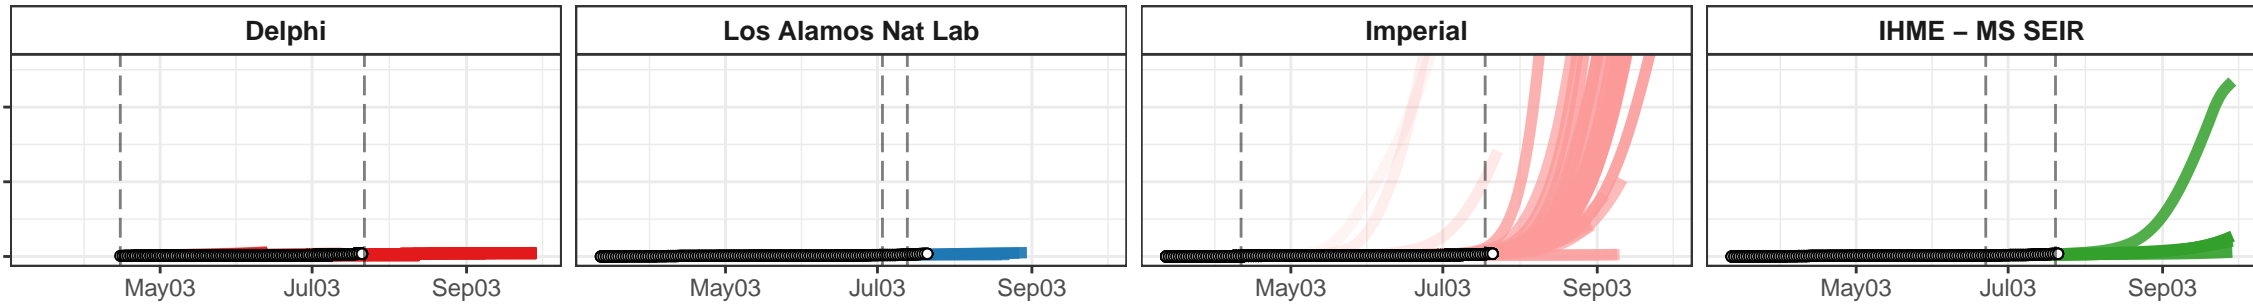

## All Cumulative Errors

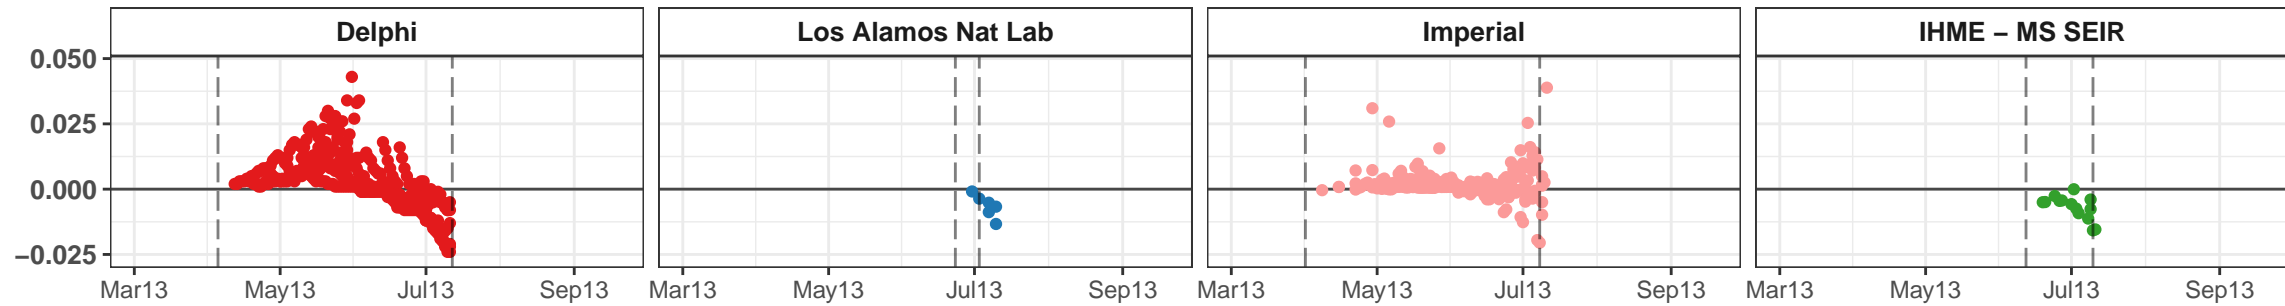

# Syria

## Current Forecast

Los Alamos Nat Lab Imperial IHME – MS SEIR

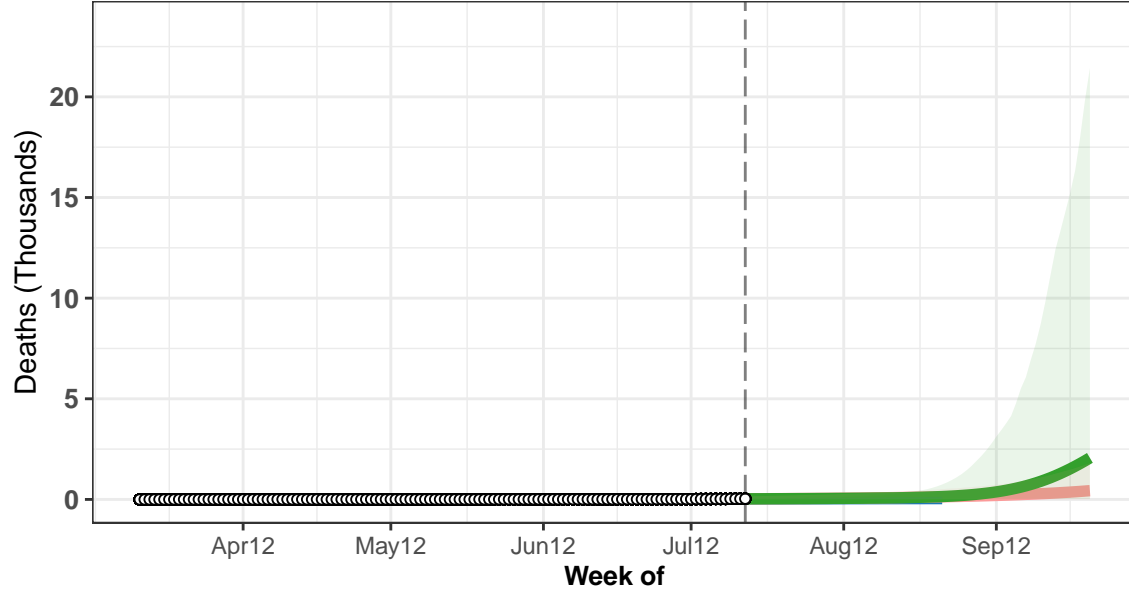

## Cumulative Out-Of-Sample Error (Post Intercept Shift)

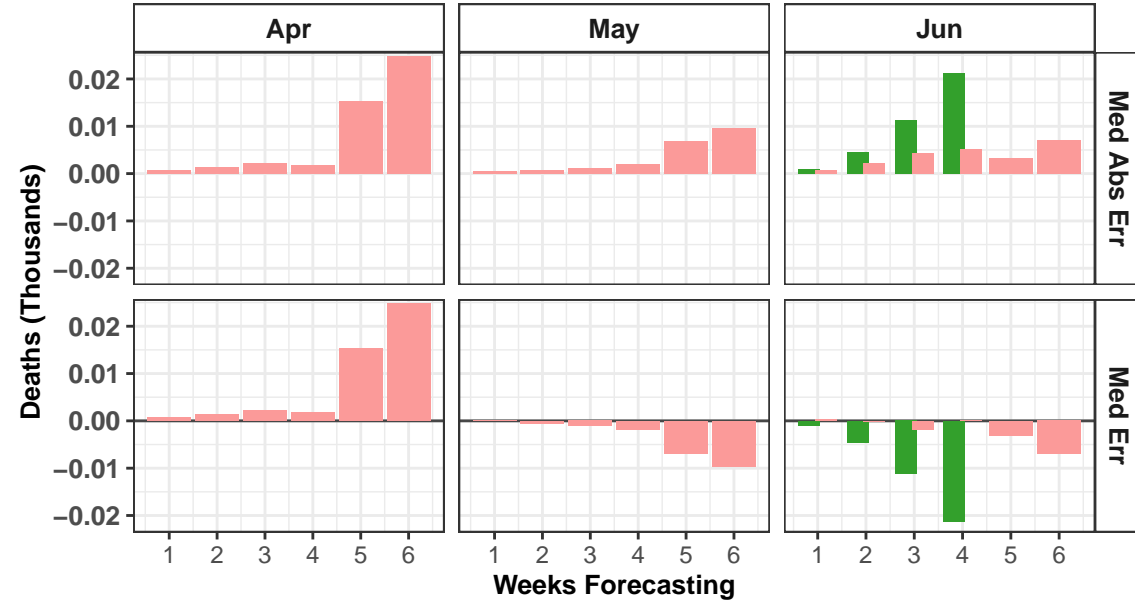

## All Model Versions

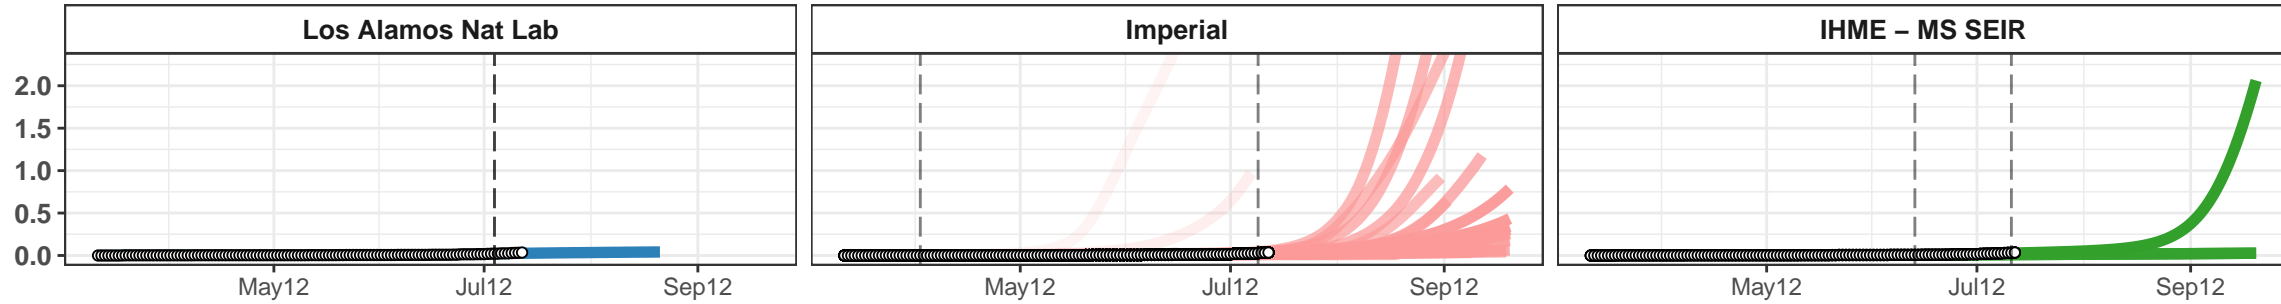

## All Cumulative Errors

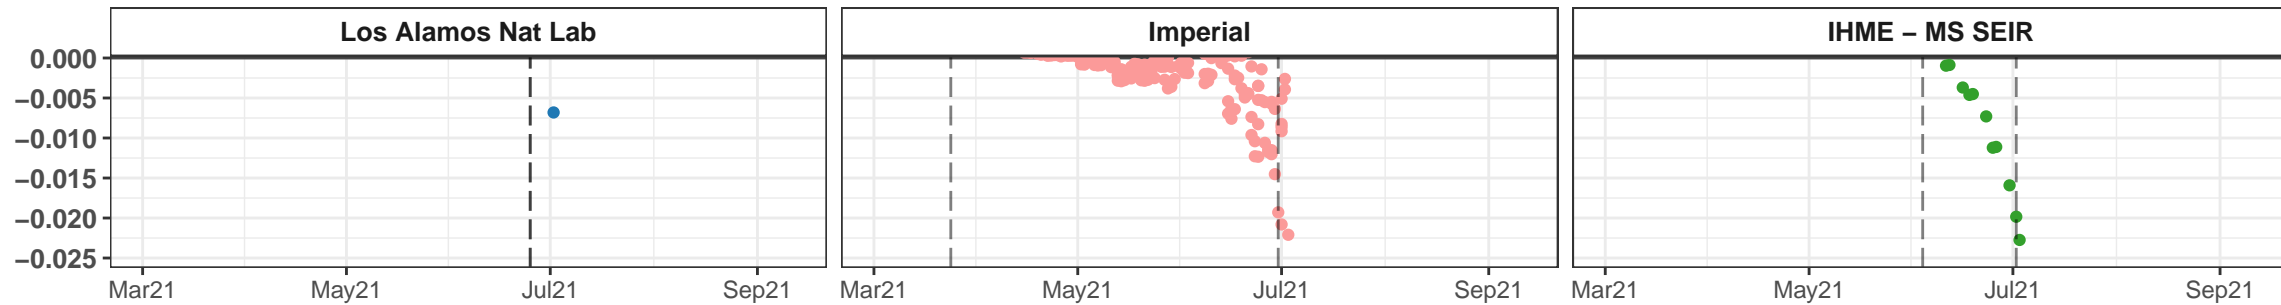

# Benin

## Current Forecast

Delphi Los Alamos Nat Lab Imperial IHME – MS SEIR

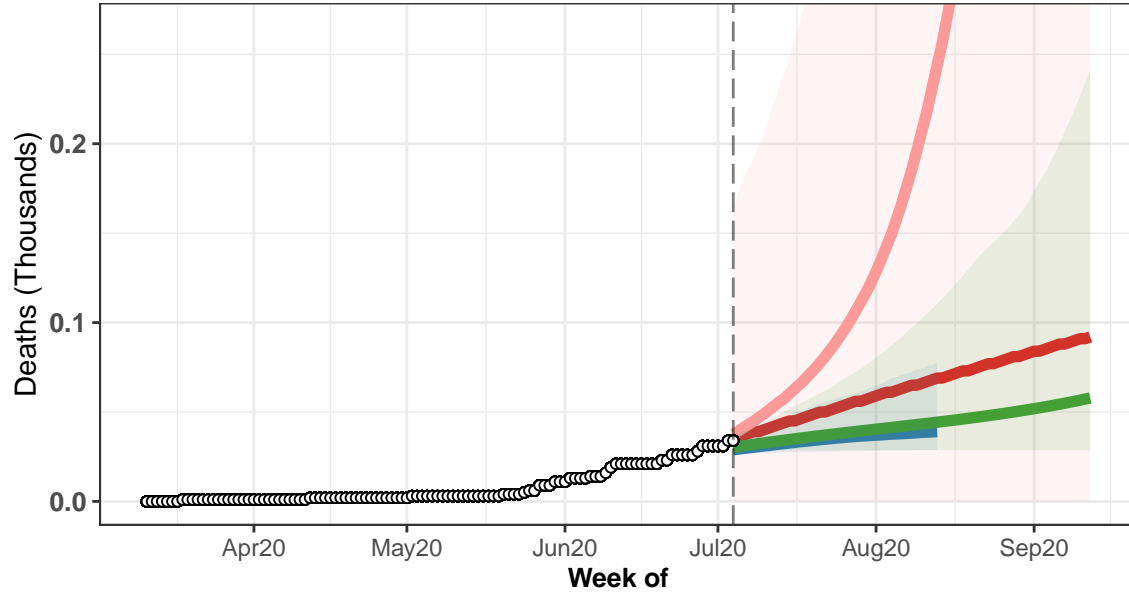

## Cumulative Out-Of-Sample Error (Post Intercept Shift)

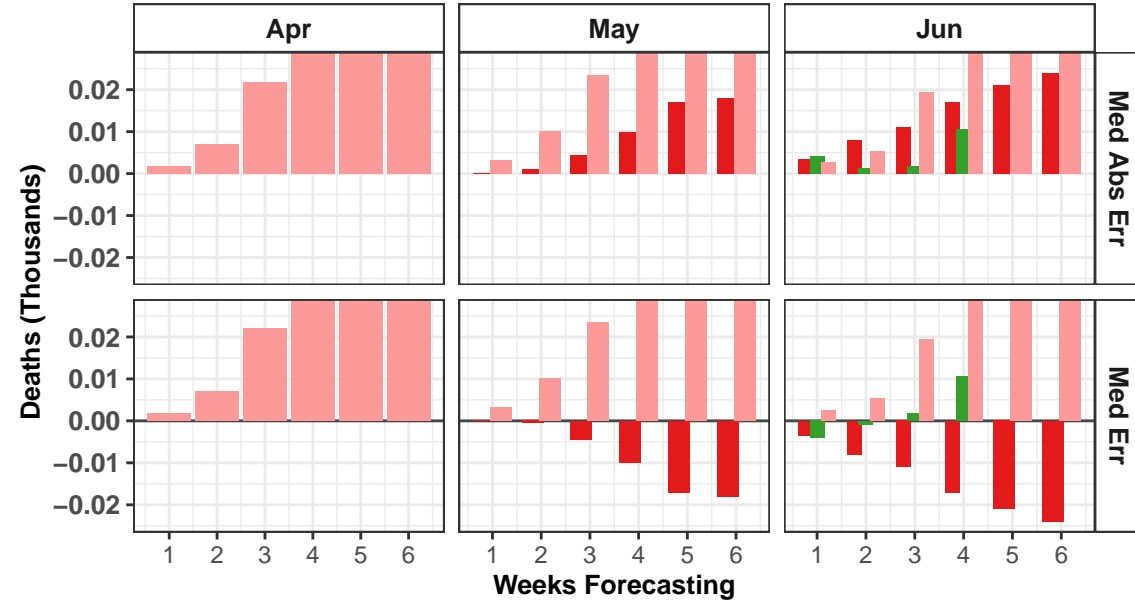

## All Model Versions

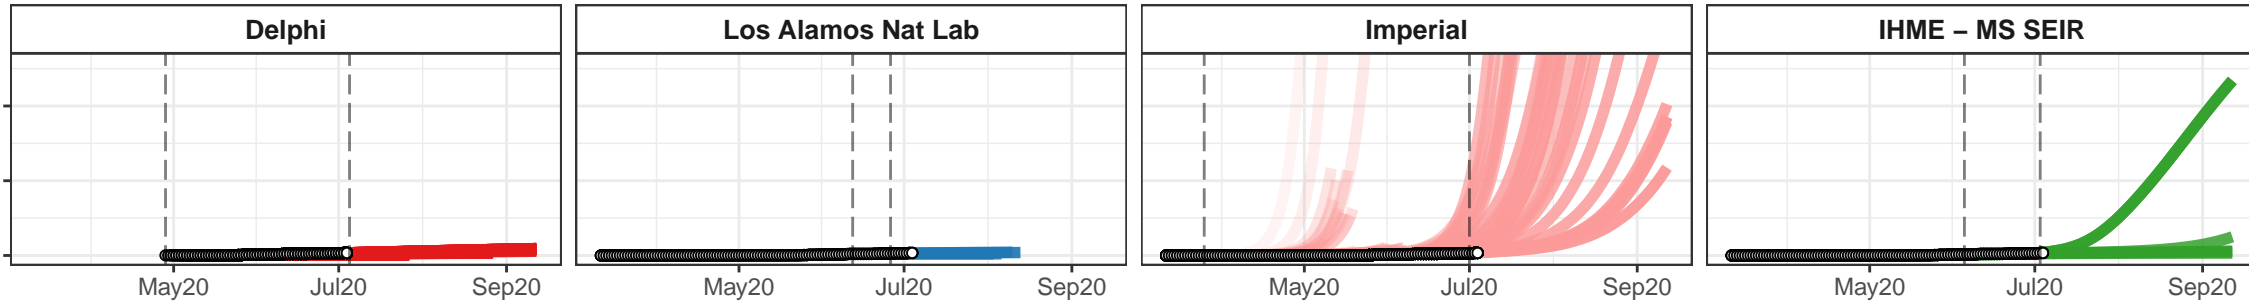

## All Cumulative Errors

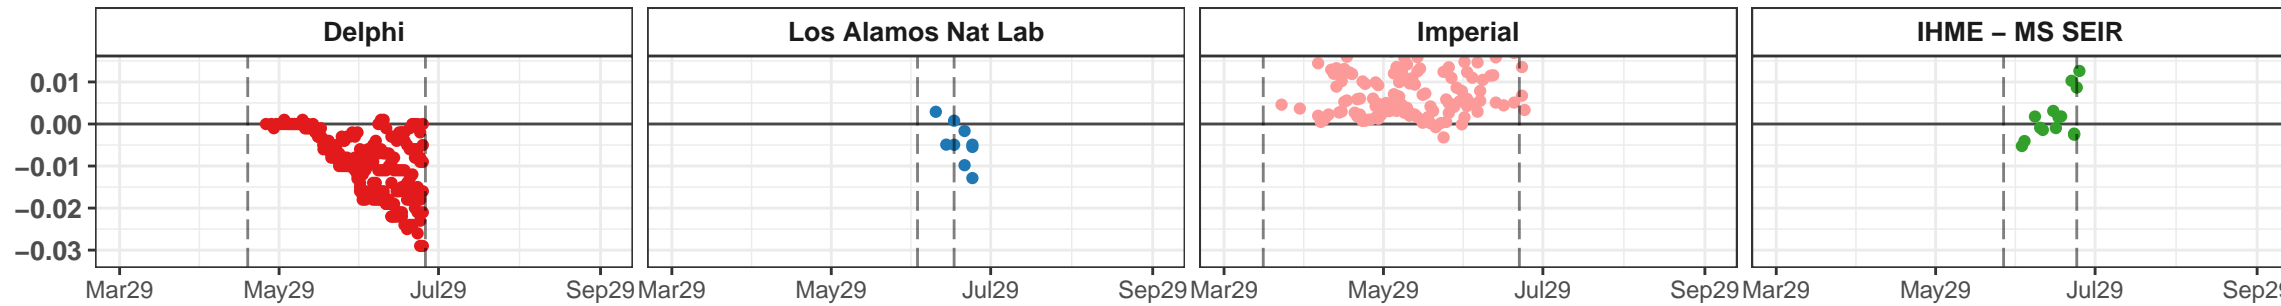

# Uruguay

## Current Forecast

Delphi Los Alamos Nat Lab Imperial IHME – MS SEIR

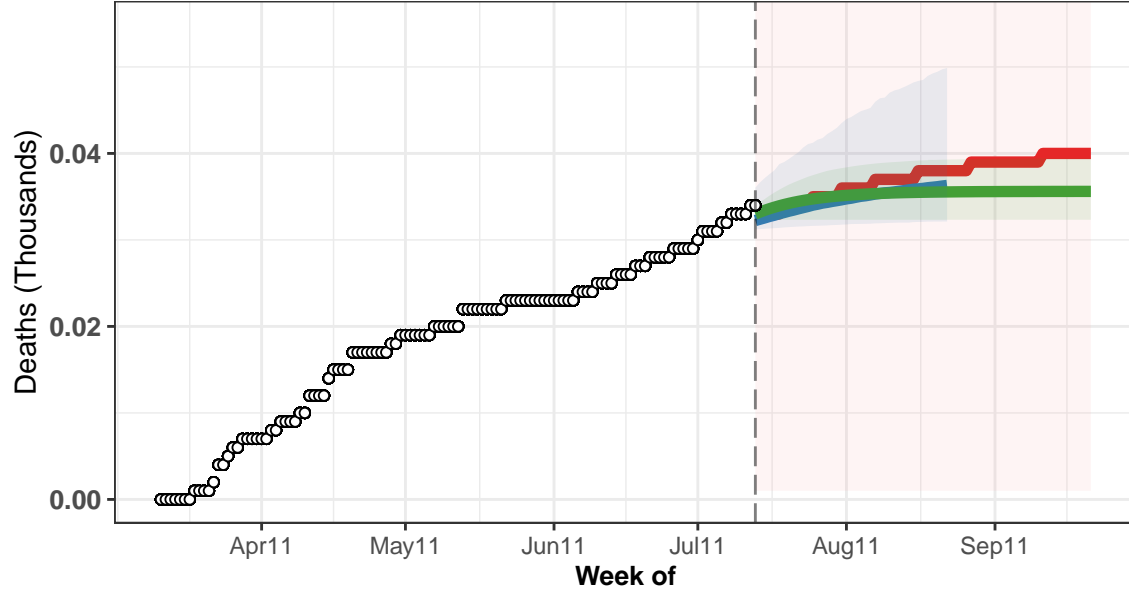

## Cumulative Out-Of-Sample Error (Post Intercept Shift)

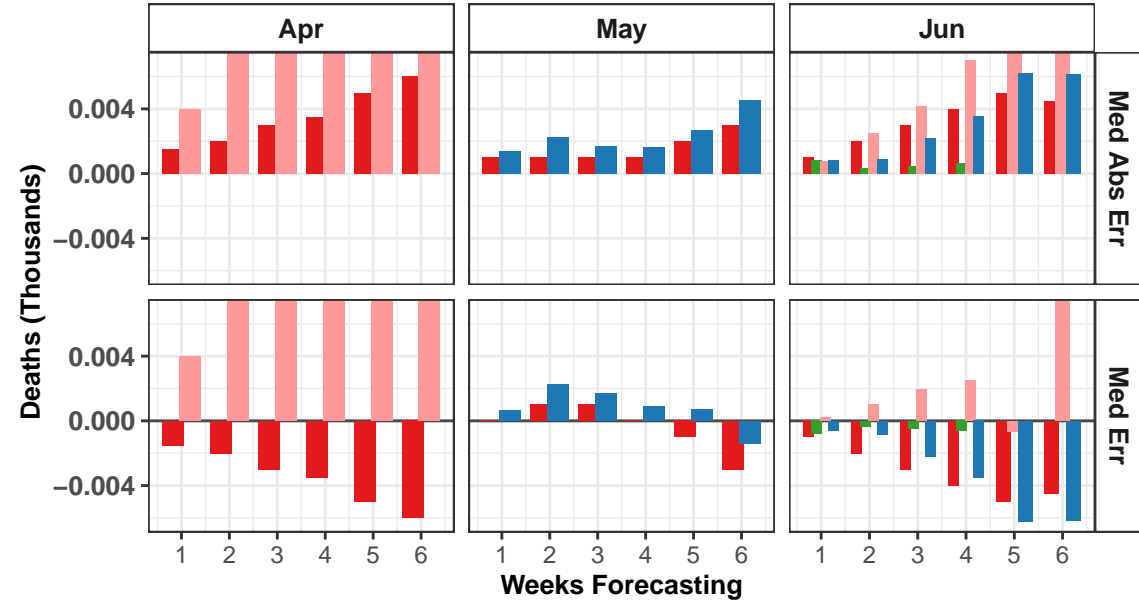

## All Model Versions

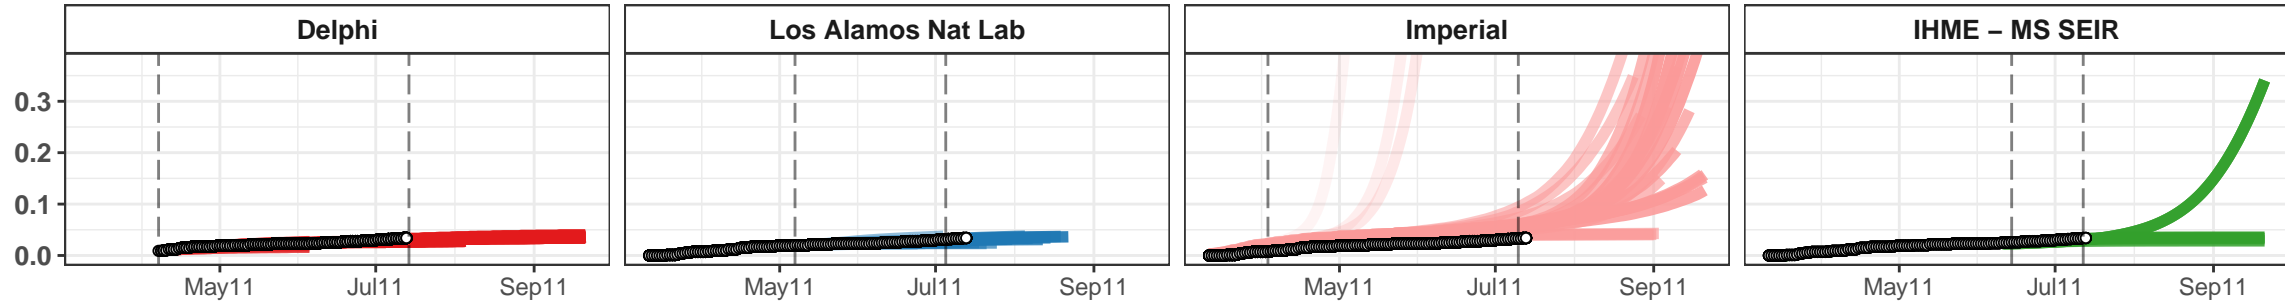

## All Cumulative Errors

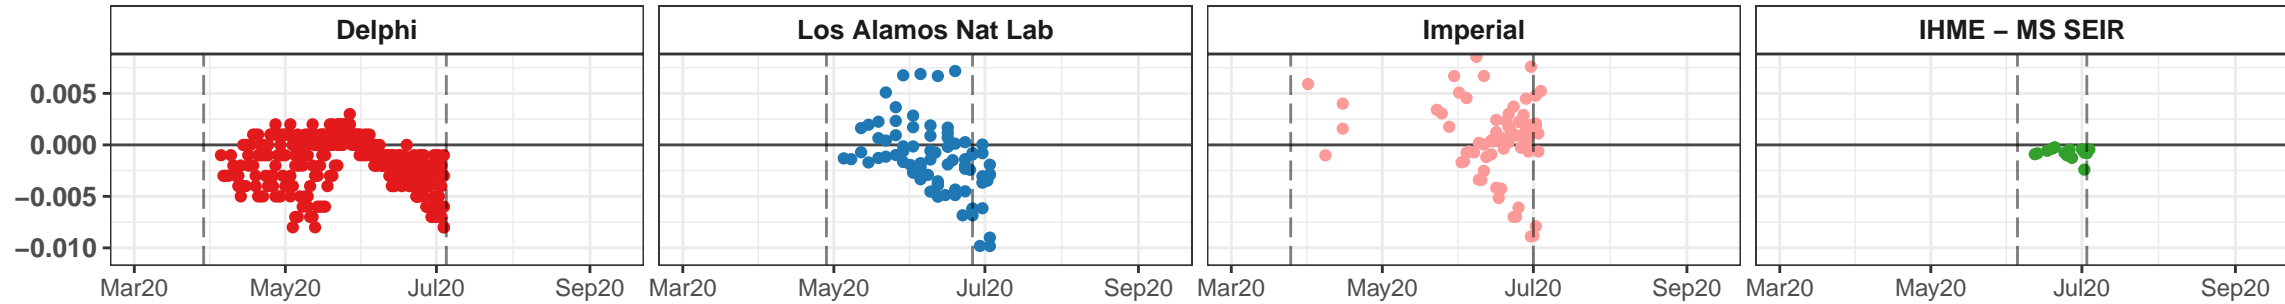

# Angola

## Current Forecast

Delphi Los Alamos Nat Lab Imperial IHME – MS SEIR

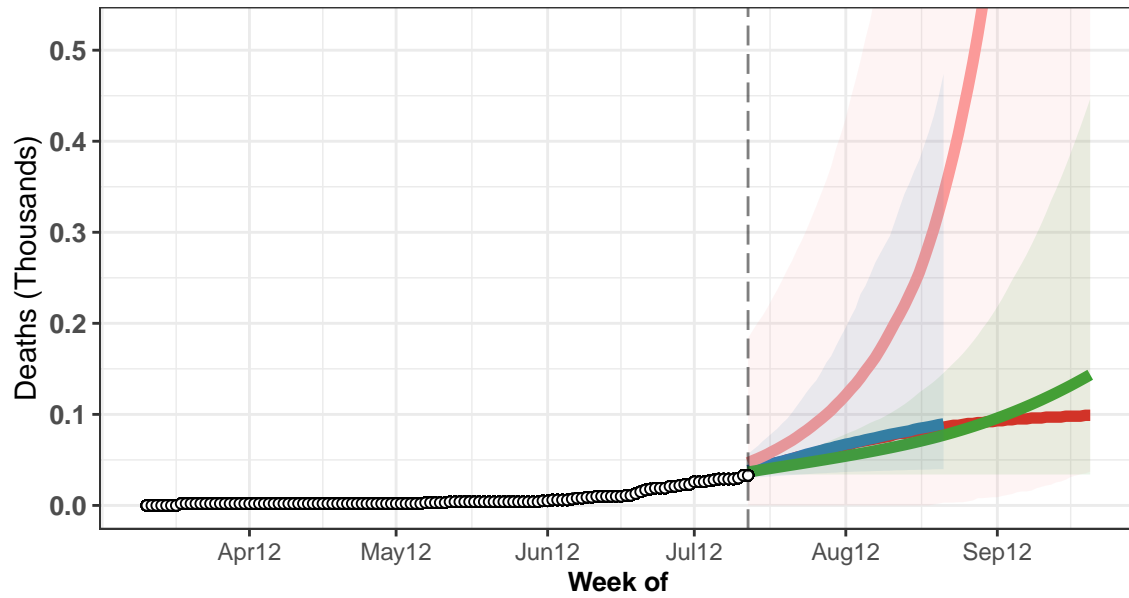

## Cumulative Out-Of-Sample Error (Post Intercept Shift)

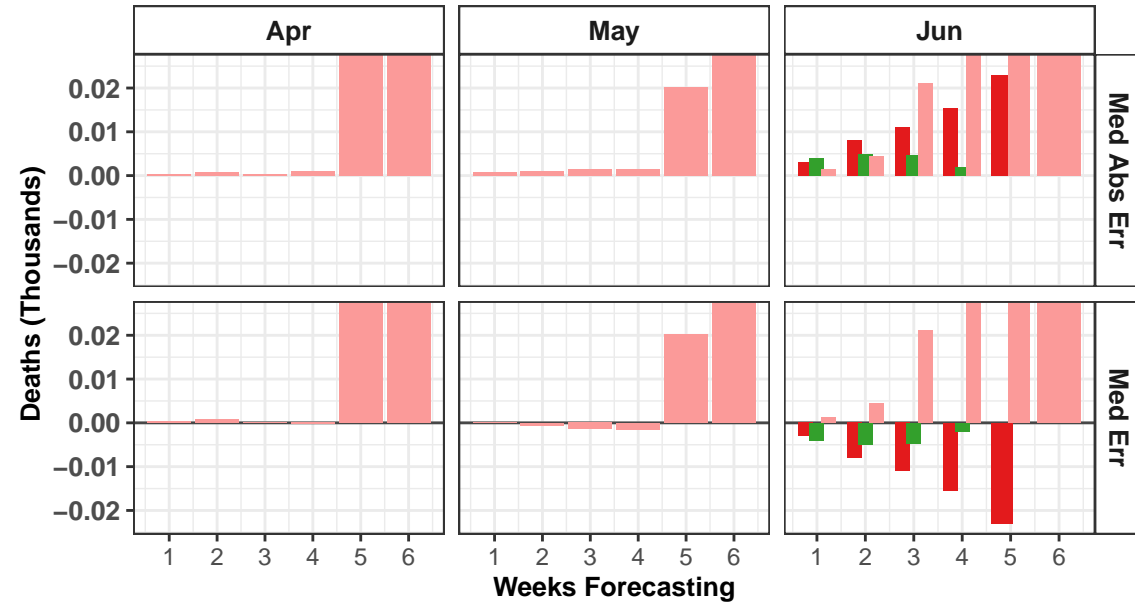

## All Model Versions

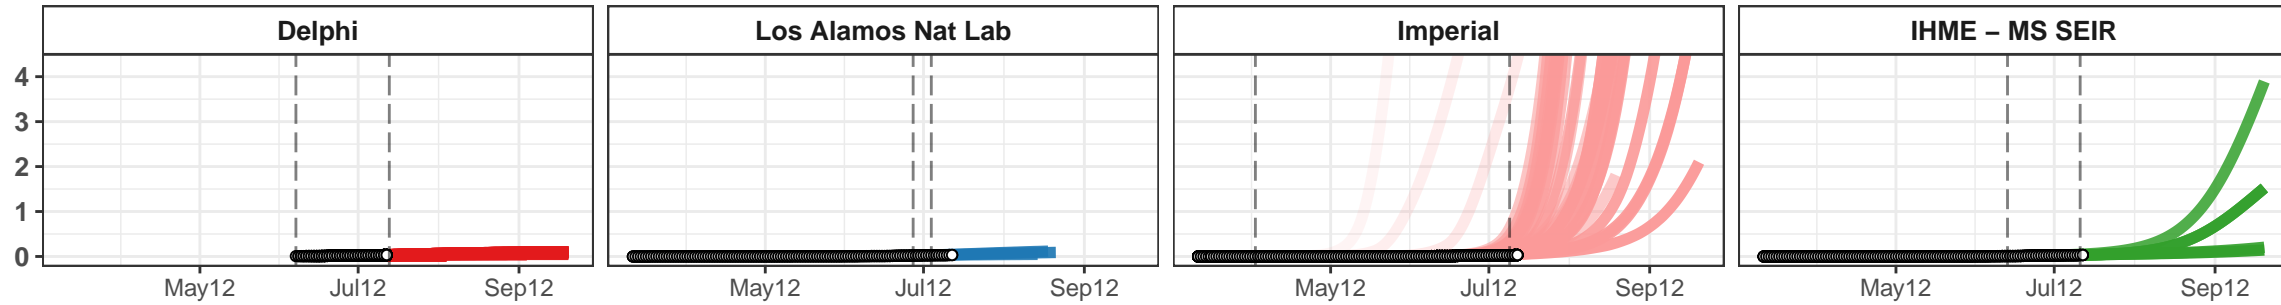

## All Cumulative Errors

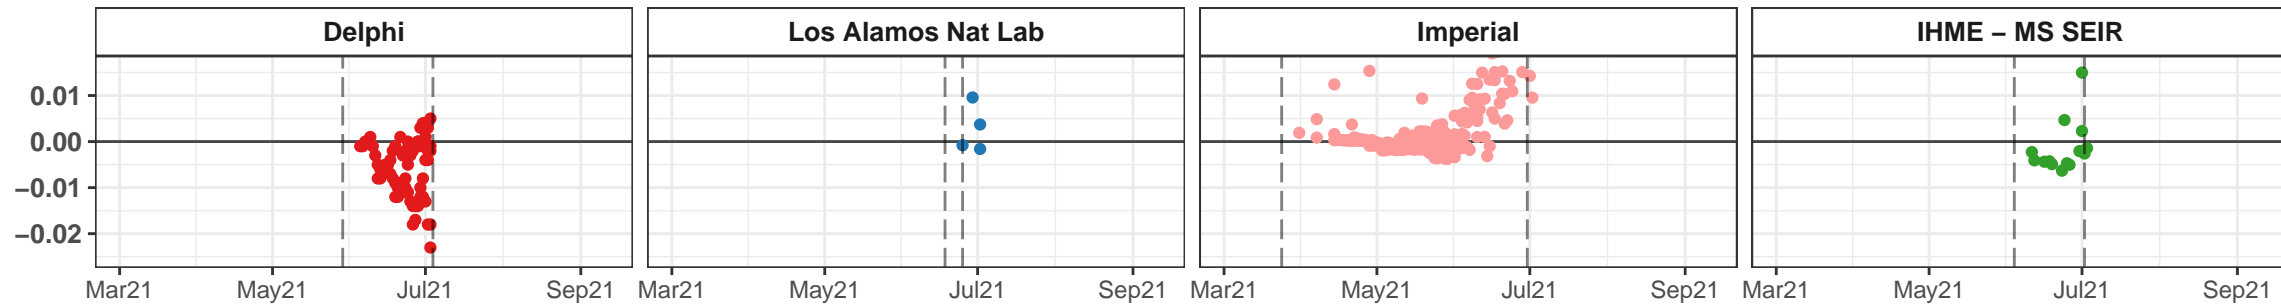



# Latvia

## Current Forecast

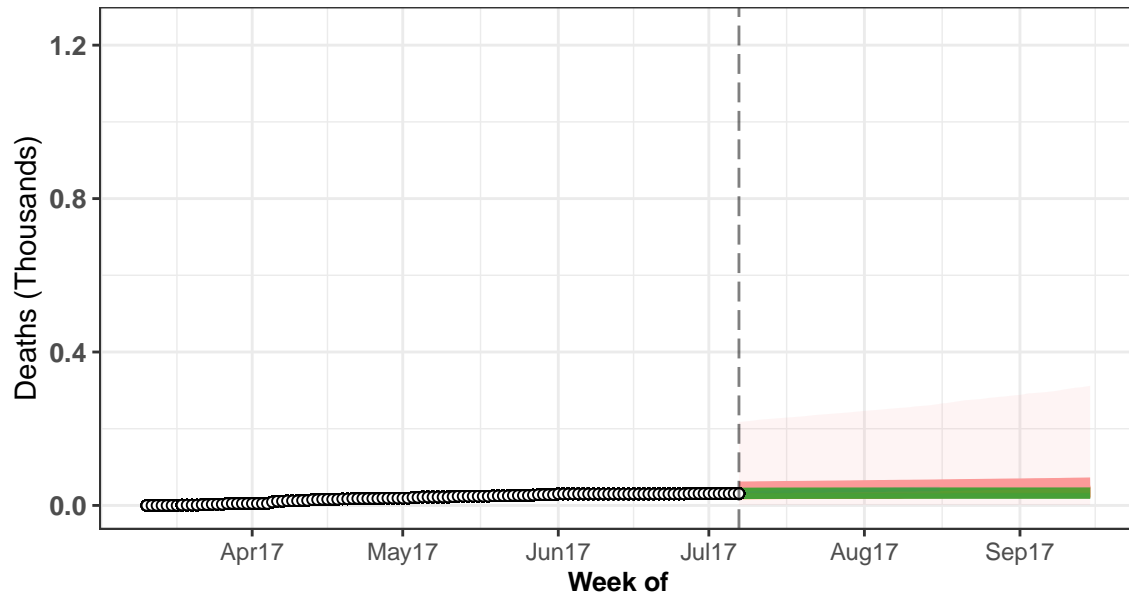

## Cumulative Out-Of-Sample Error (Post Intercept Shift)

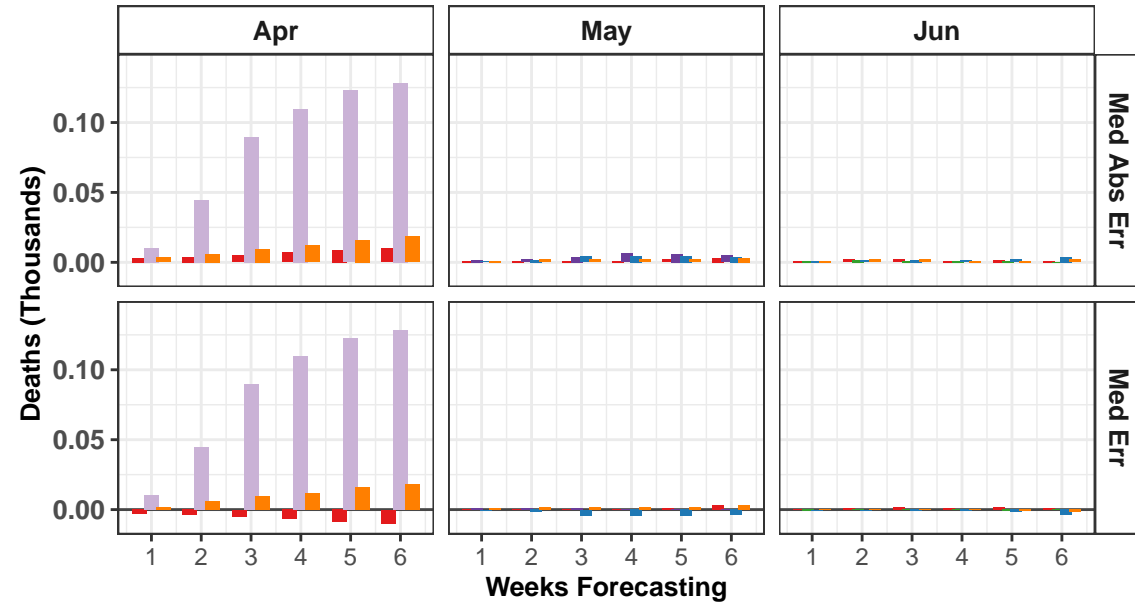

## All Model Versions

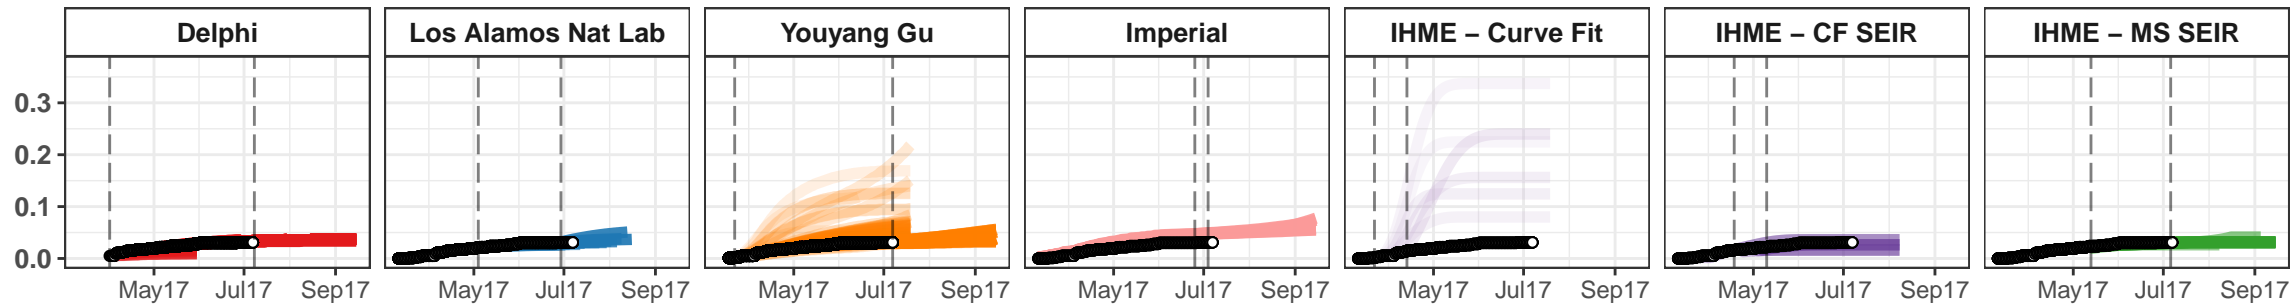

## All Cumulative Errors

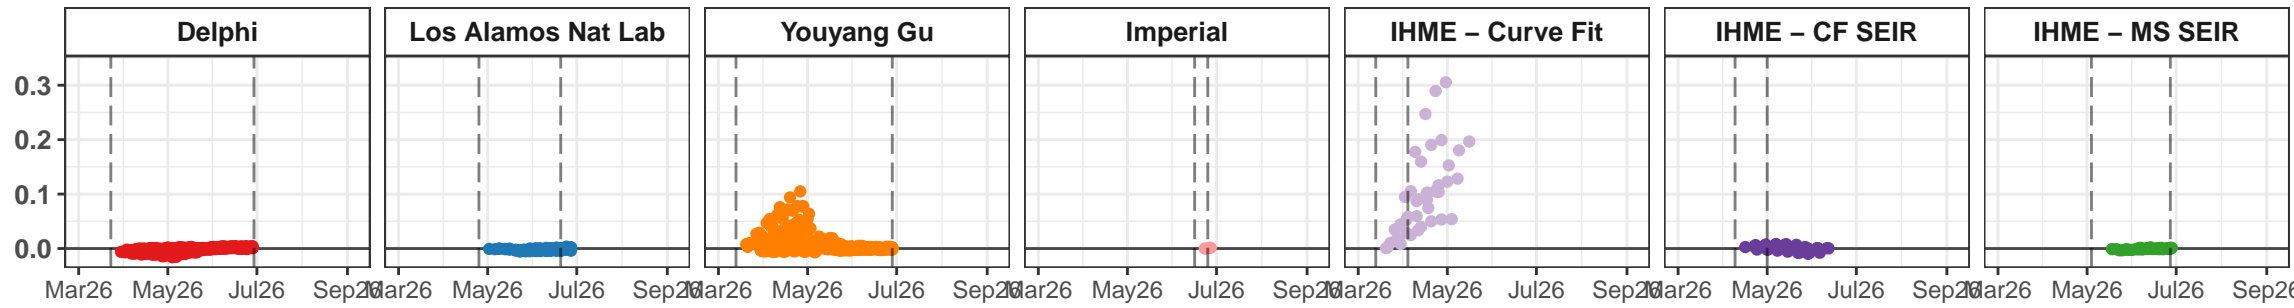

# Slovakia

## Current Forecast

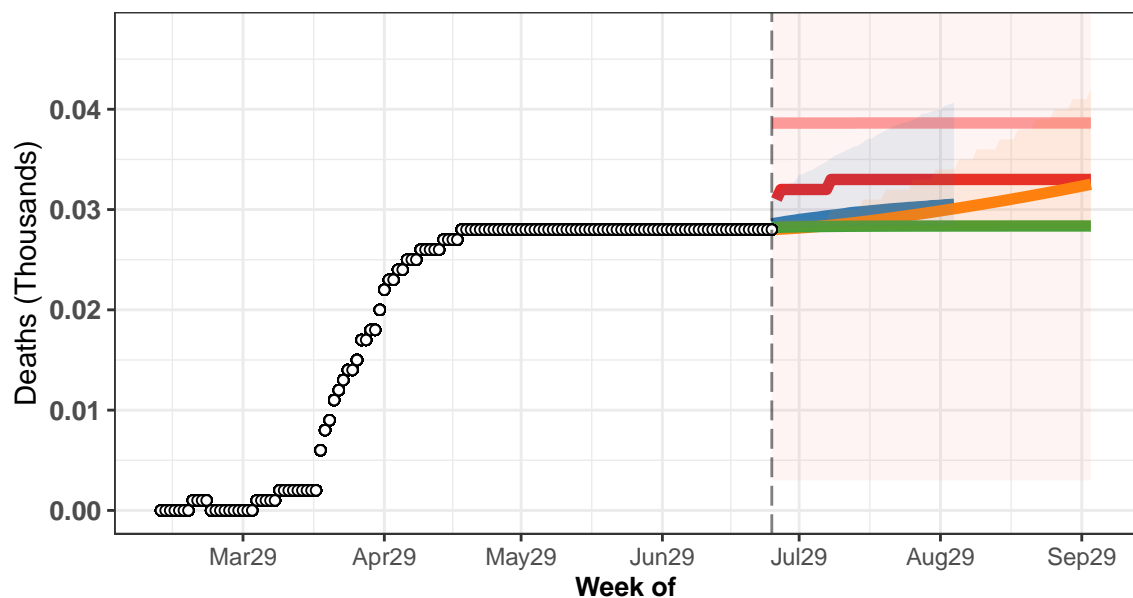

## Cumulative Out-Of-Sample Error (Post Intercept Shift)

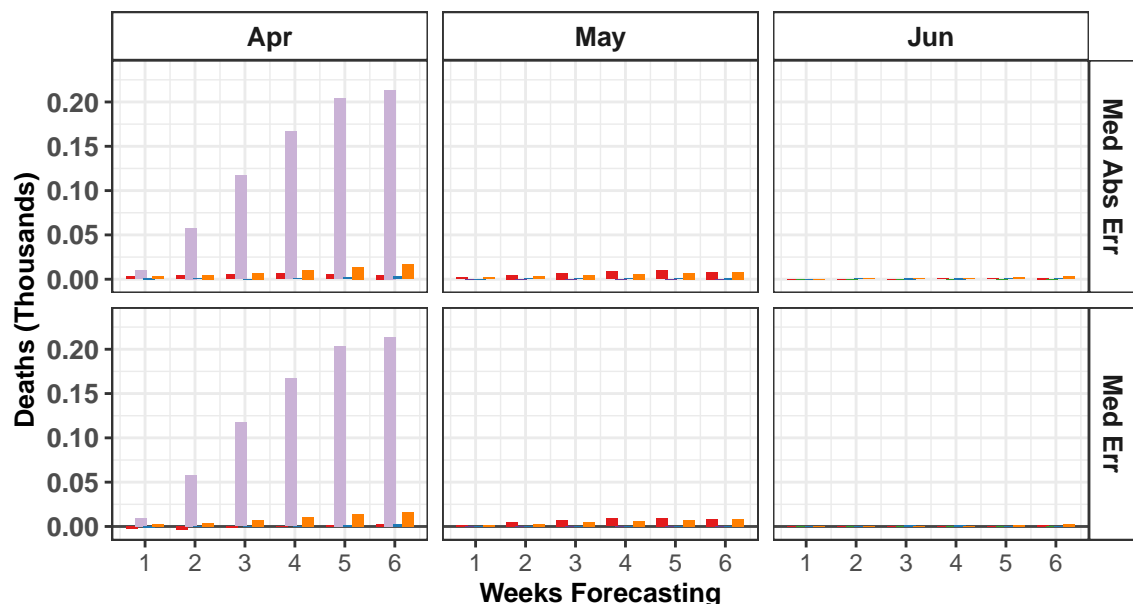

## All Model Versions

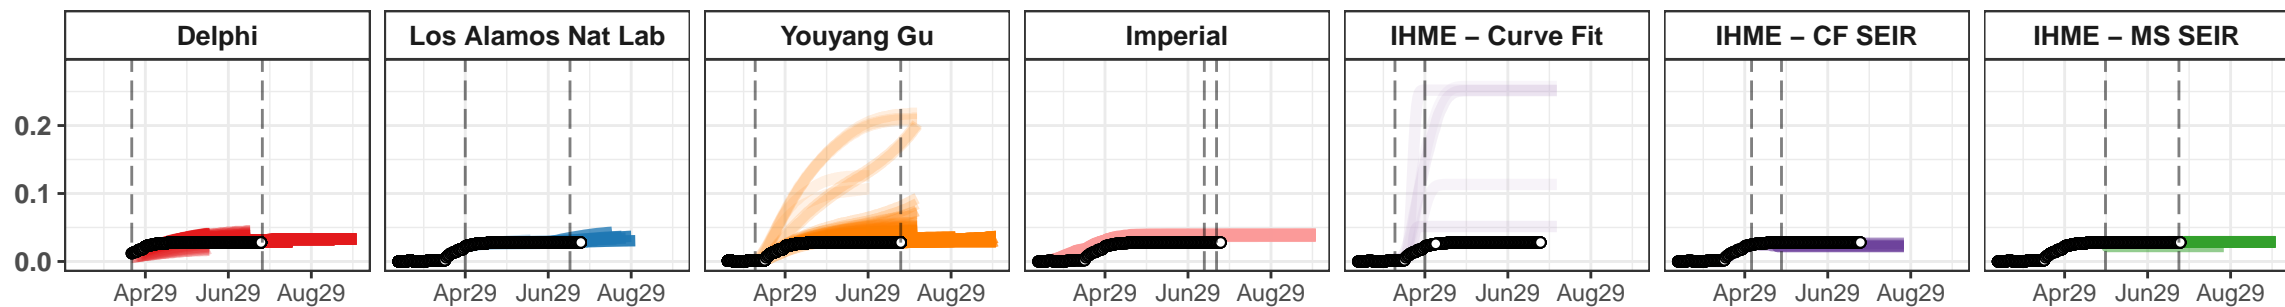

## All Cumulative Errors

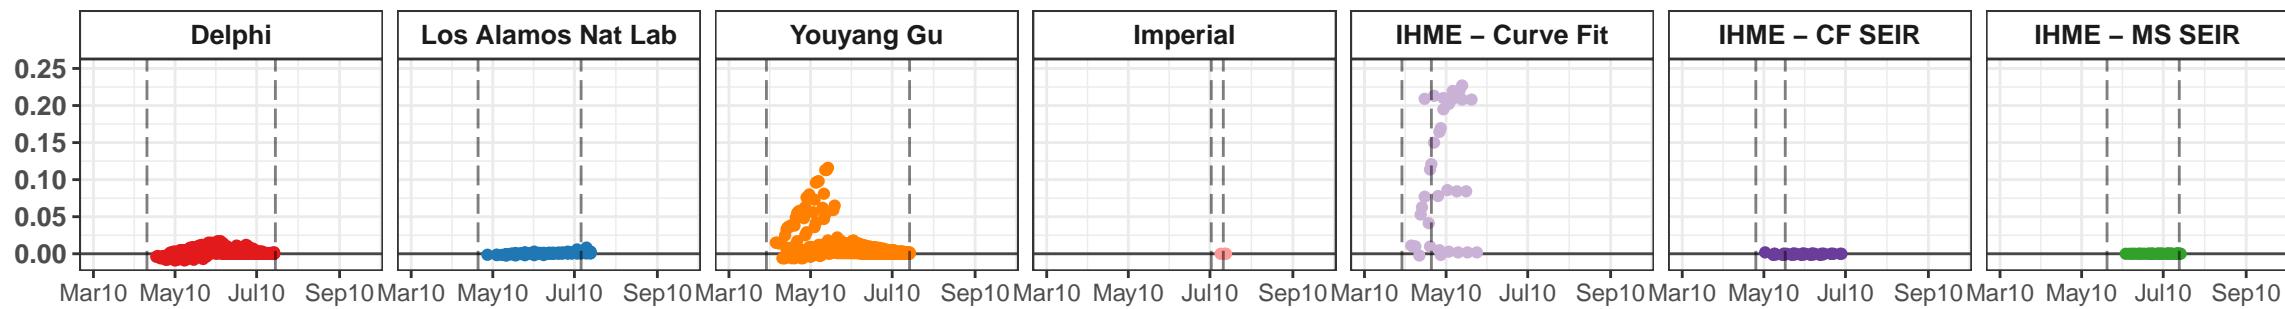

# Swaziland

## Current Forecast

Los Alamos Nat Lab Imperial IHME – MS SEIR

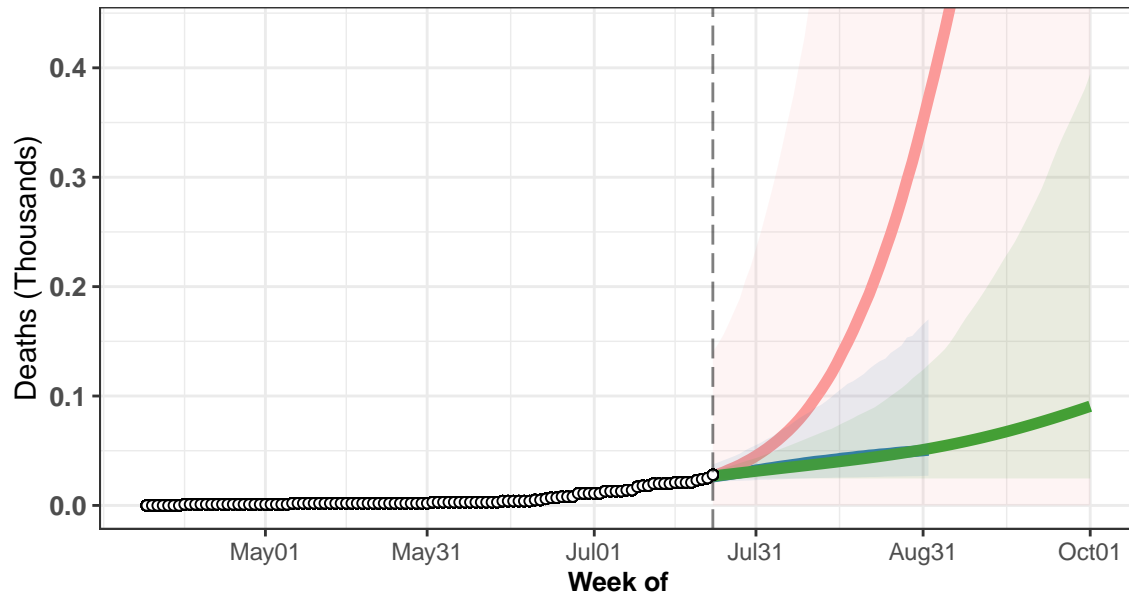

## Cumulative Out-Of-Sample Error (Post Intercept Shift)

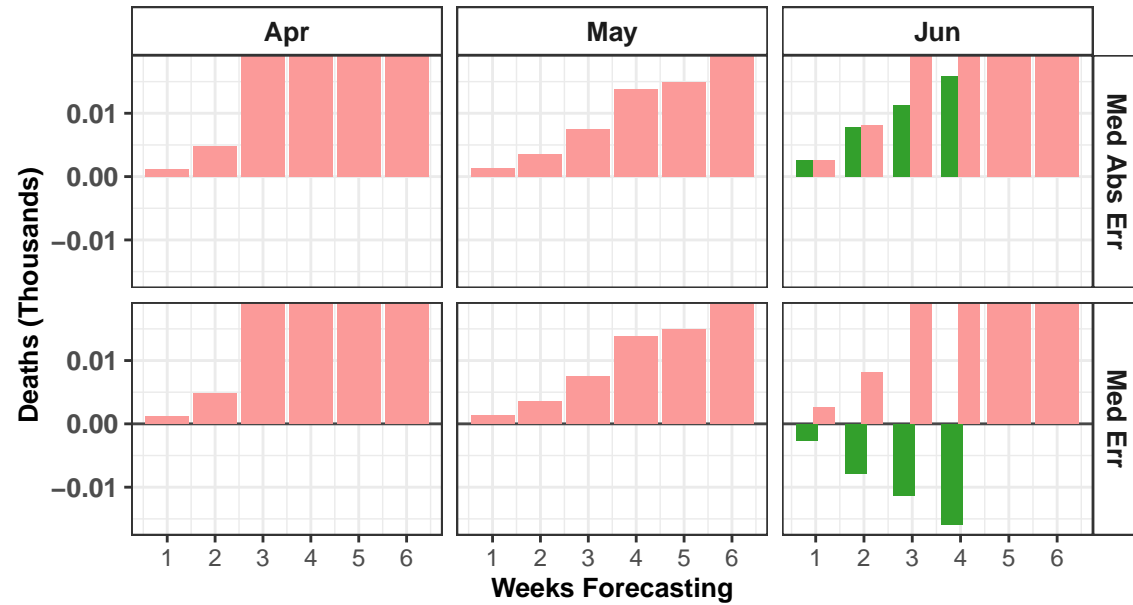

## All Model Versions

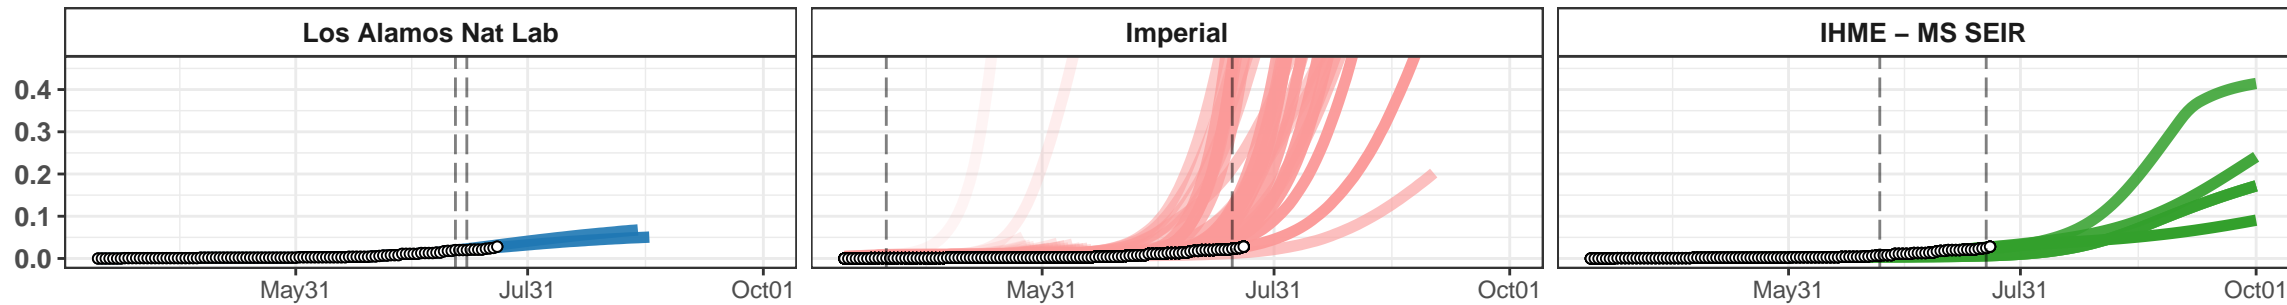

## All Cumulative Errors

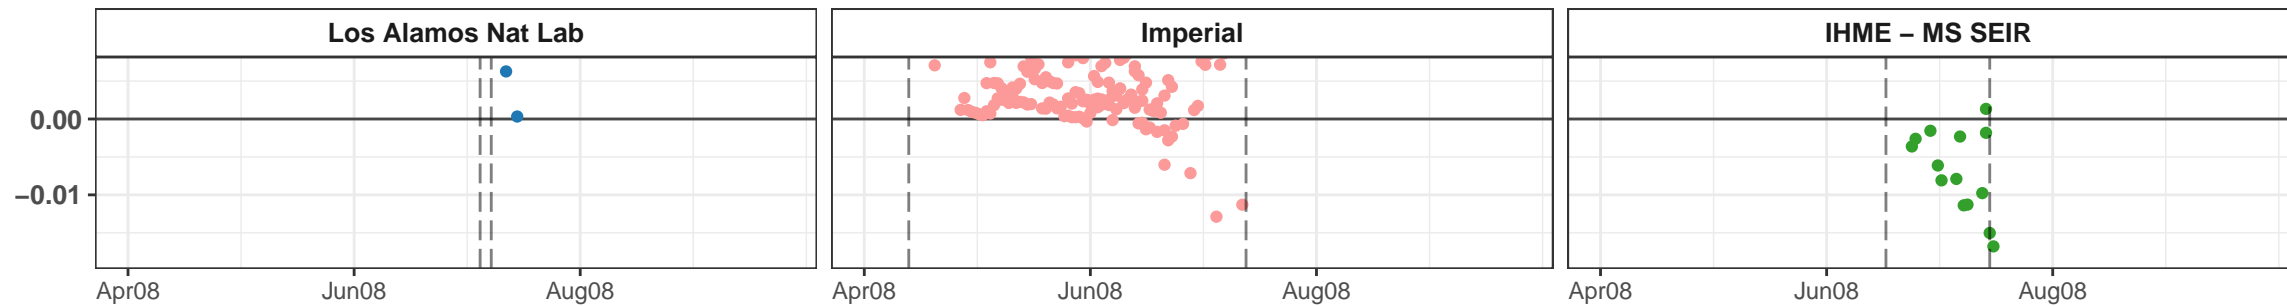

# Zimbabwe

## Current Forecast

Delphi Los Alamos Nat Lab Imperial IHME – MS SEIR

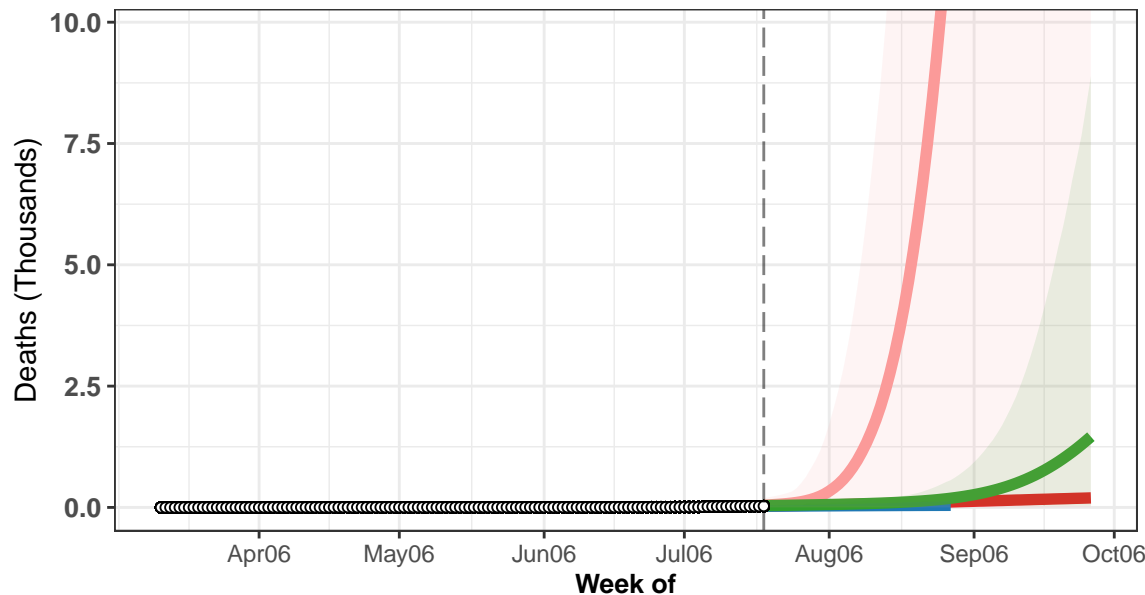

## Cumulative Out-Of-Sample Error (Post Intercept Shift)

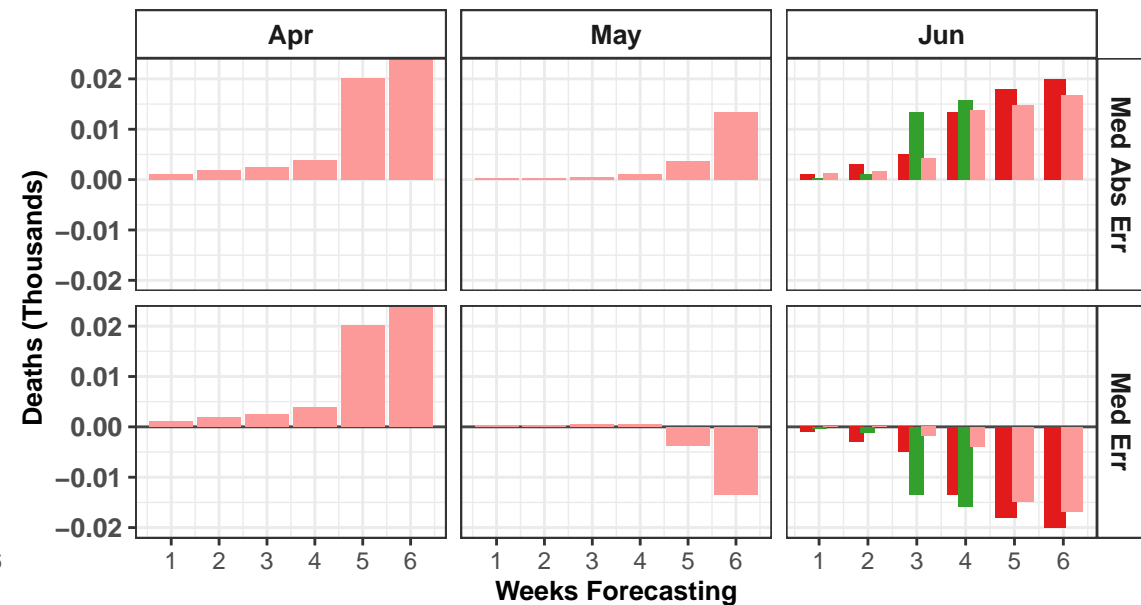

## All Model Versions

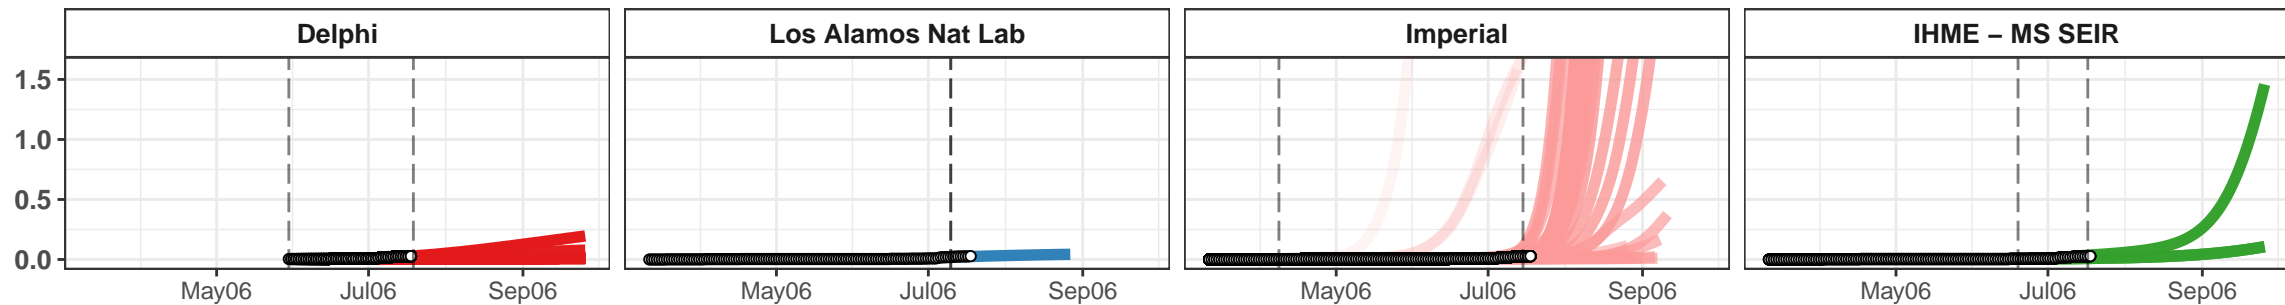

## All Cumulative Errors

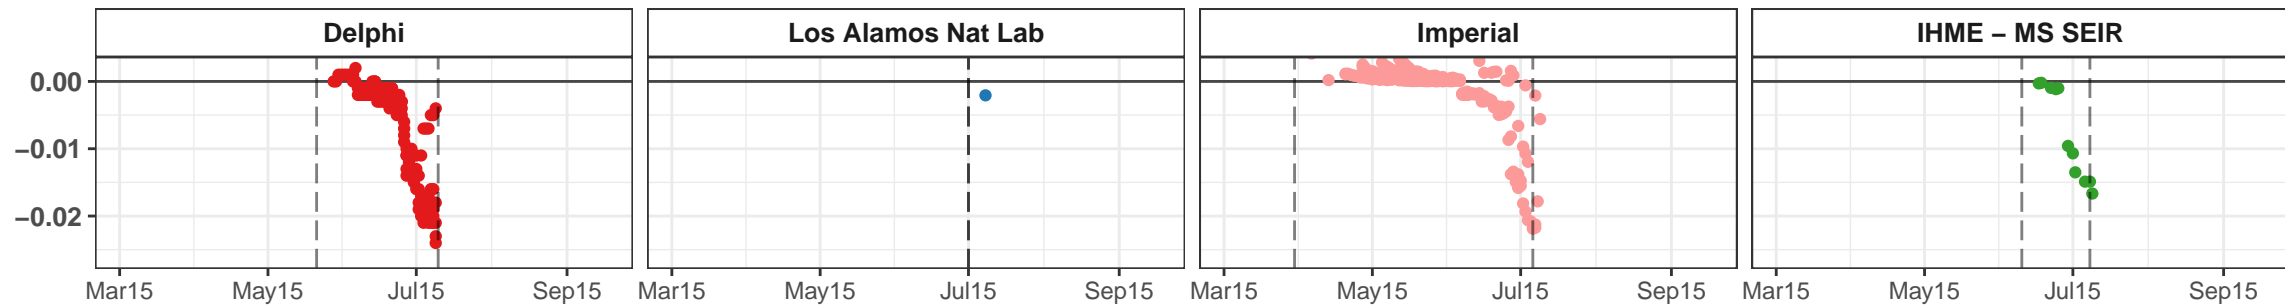

# Singapore

## Current Forecast

Delphi Los Alamos Nat Lab Imperial IHME – MS SEIR

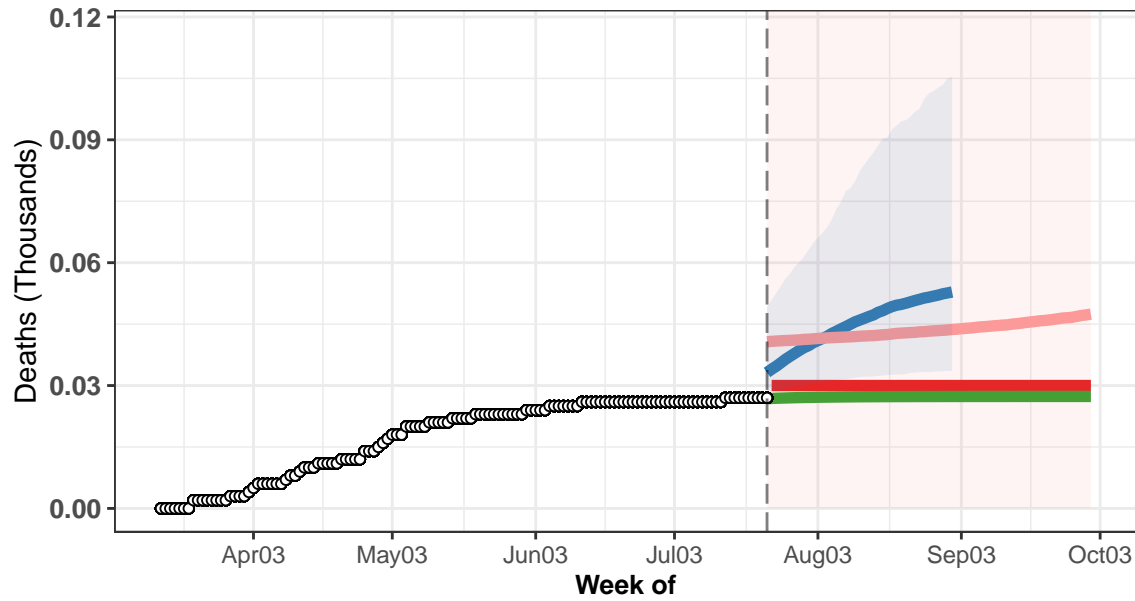

## Cumulative Out-Of-Sample Error (Post Intercept Shift)

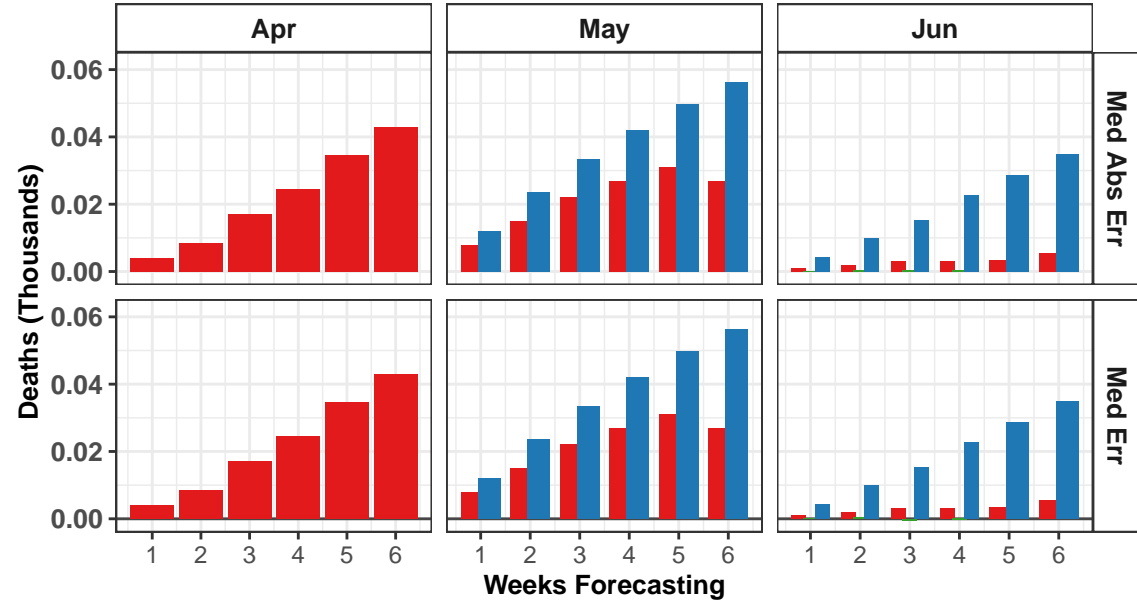

## All Model Versions

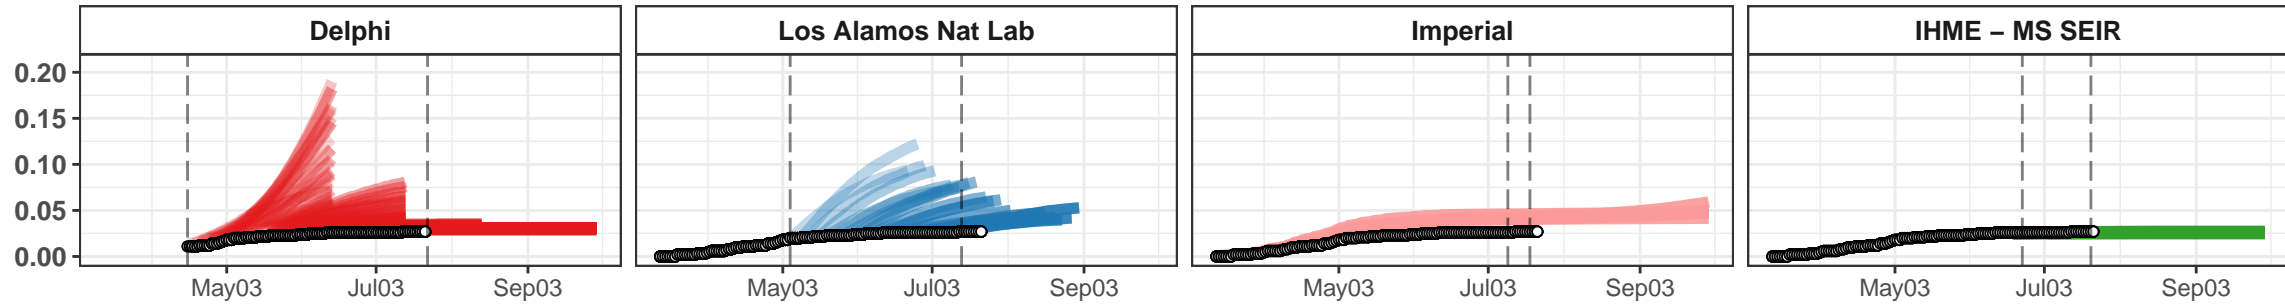

## All Cumulative Errors

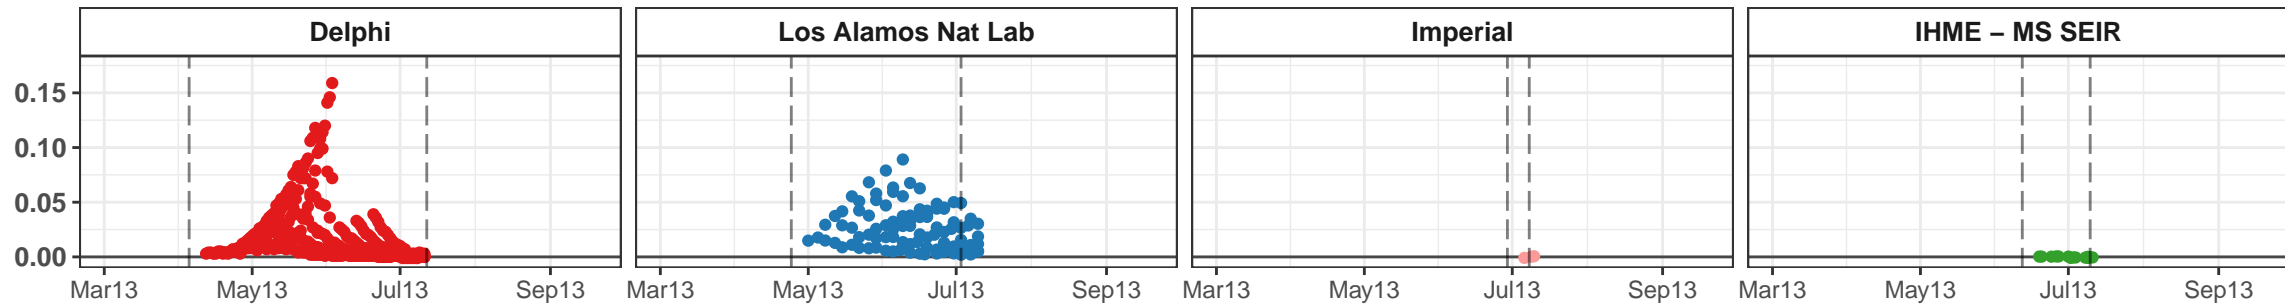

# Guinea-Bissau

## Current Forecast

Delphi Los Alamos Nat Lab Imperial IHME – MS SEIR

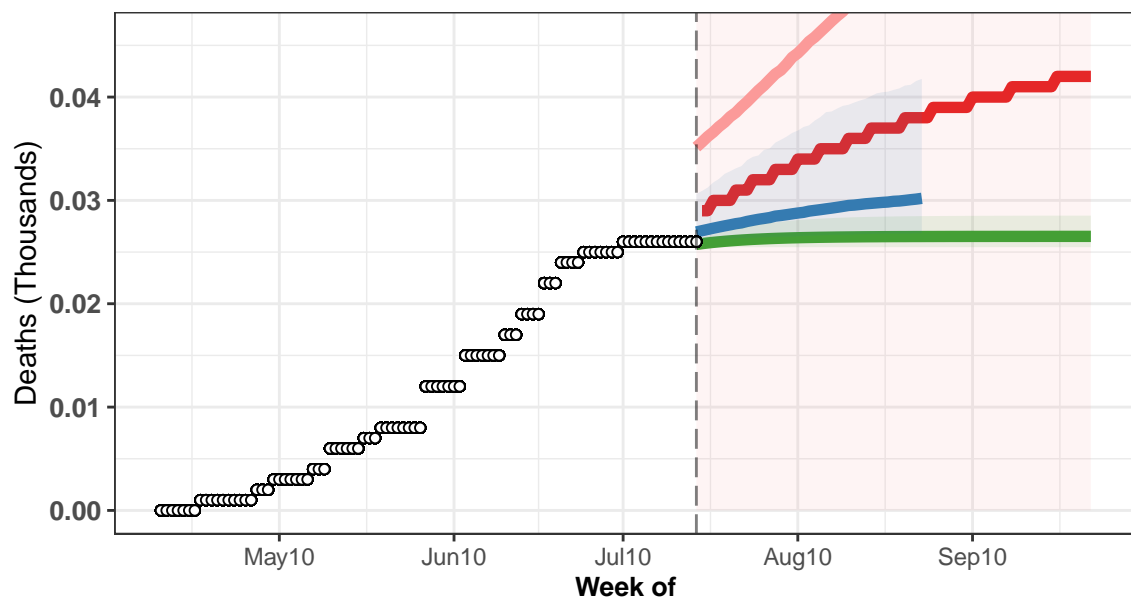

## Cumulative Out-Of-Sample Error (Post Intercept Shift)

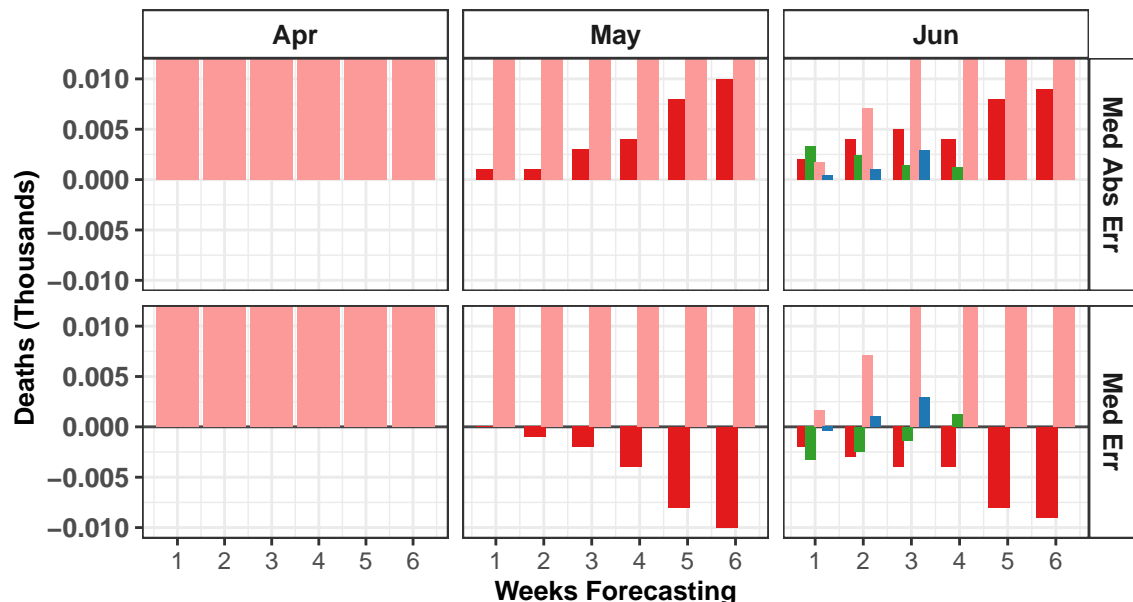

## All Model Versions

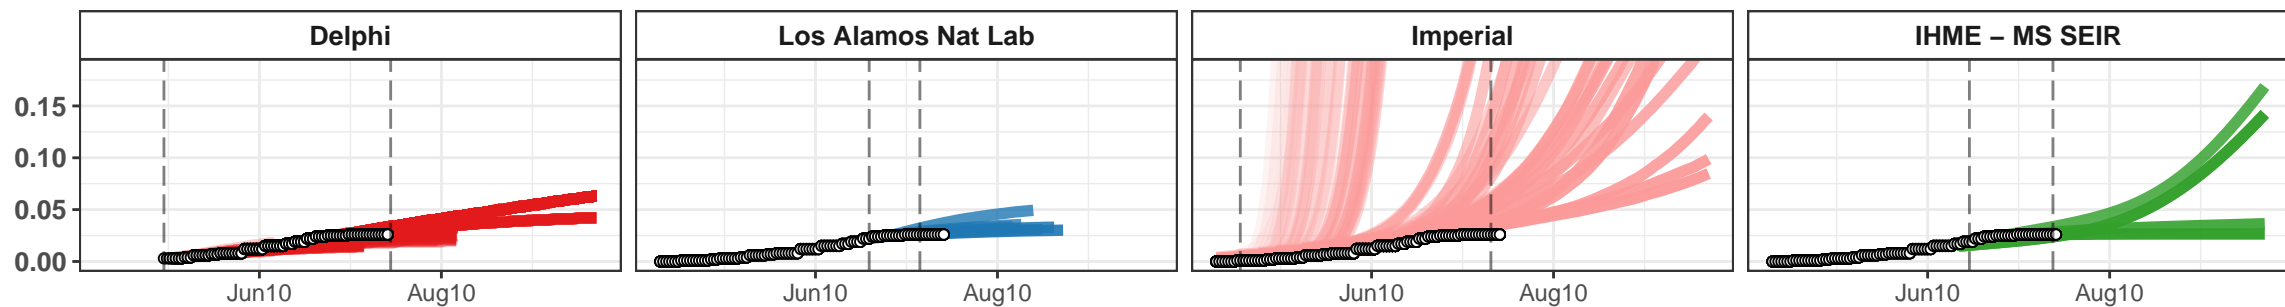

## All Cumulative Errors

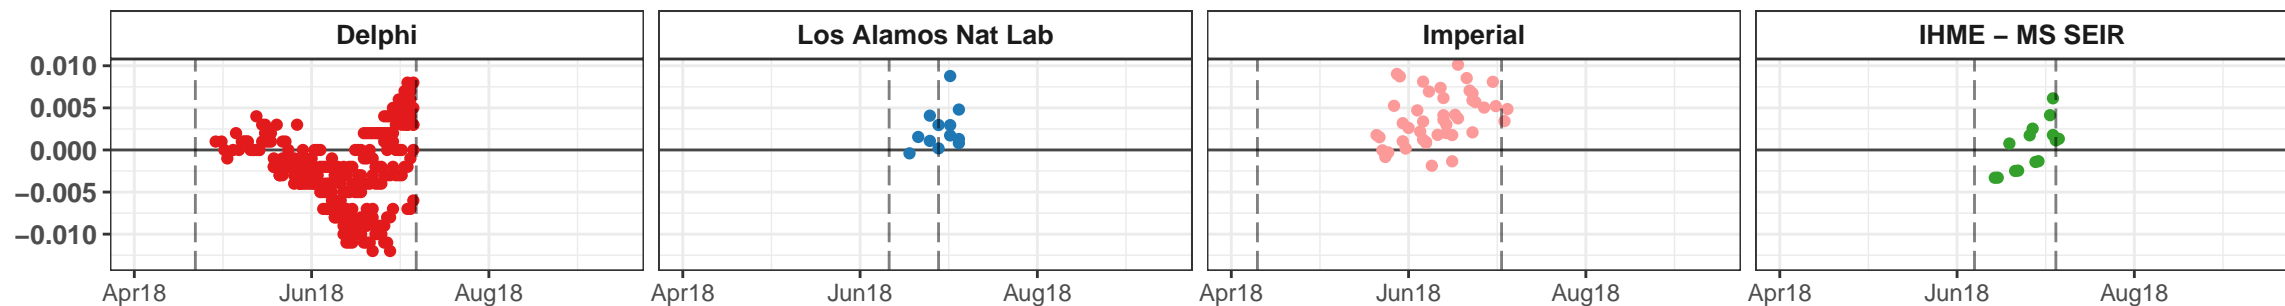

# Hawaii

## Current Forecast

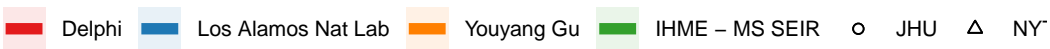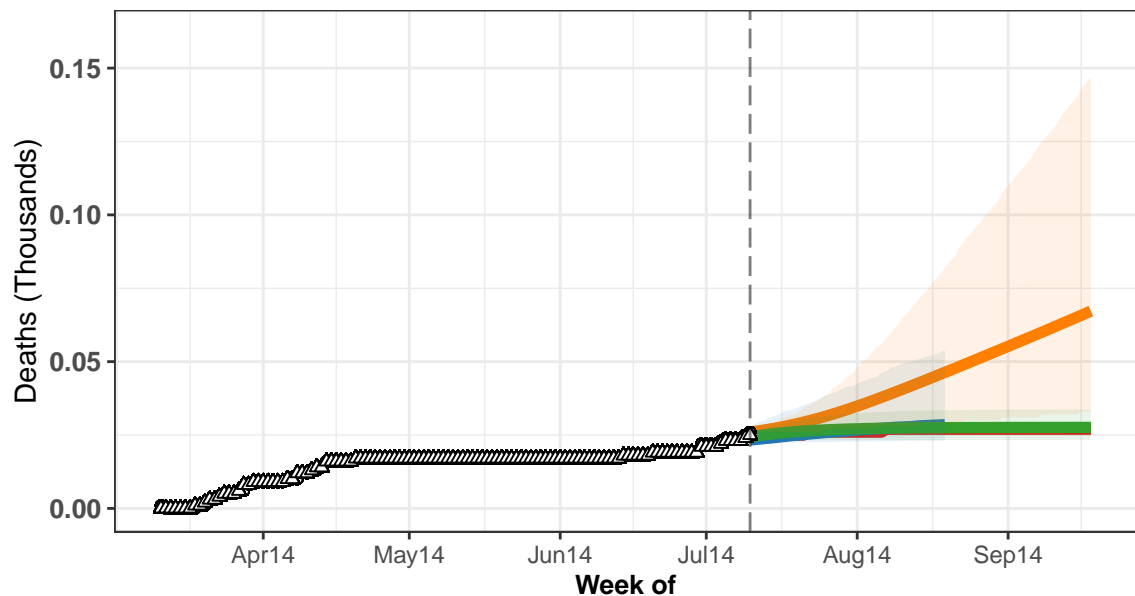

## Cumulative Out-Of-Sample Error (Post Intercept Shift)

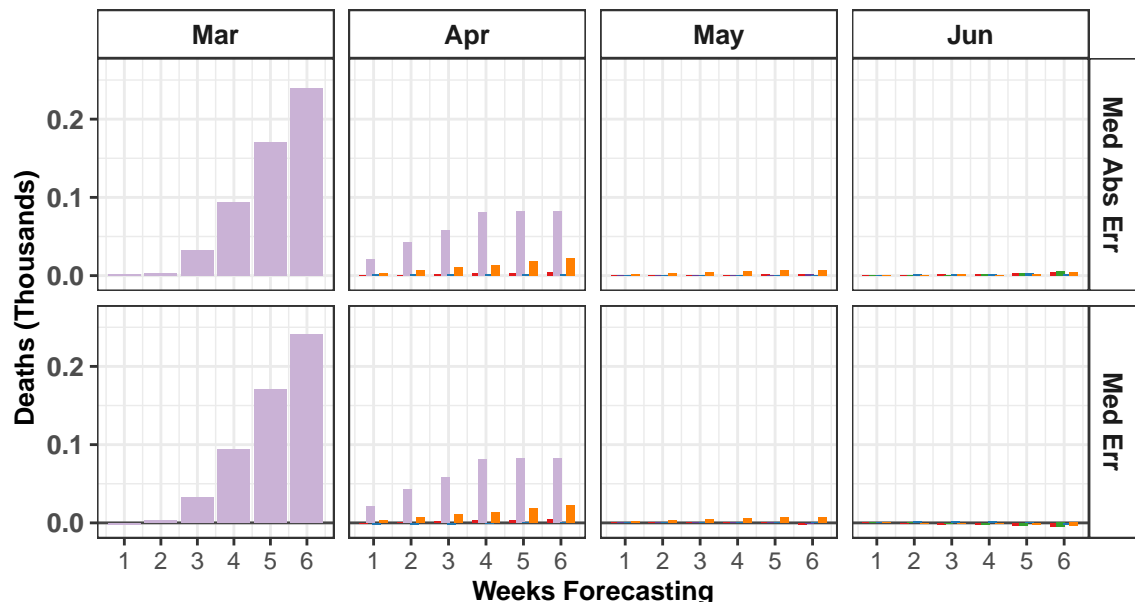

## All Model Versions

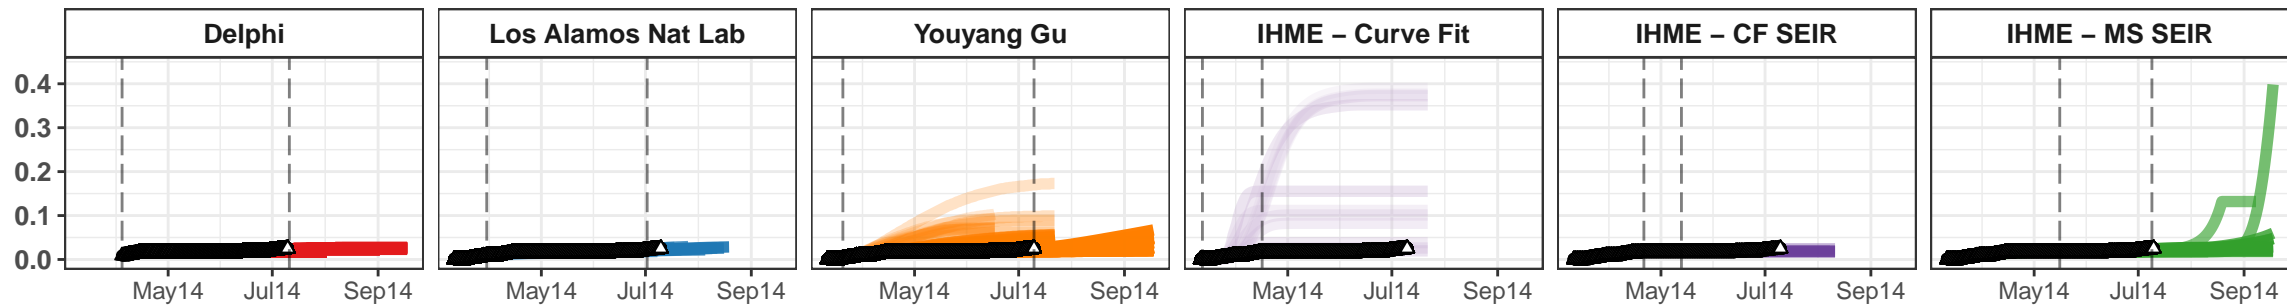

## All Cumulative Errors

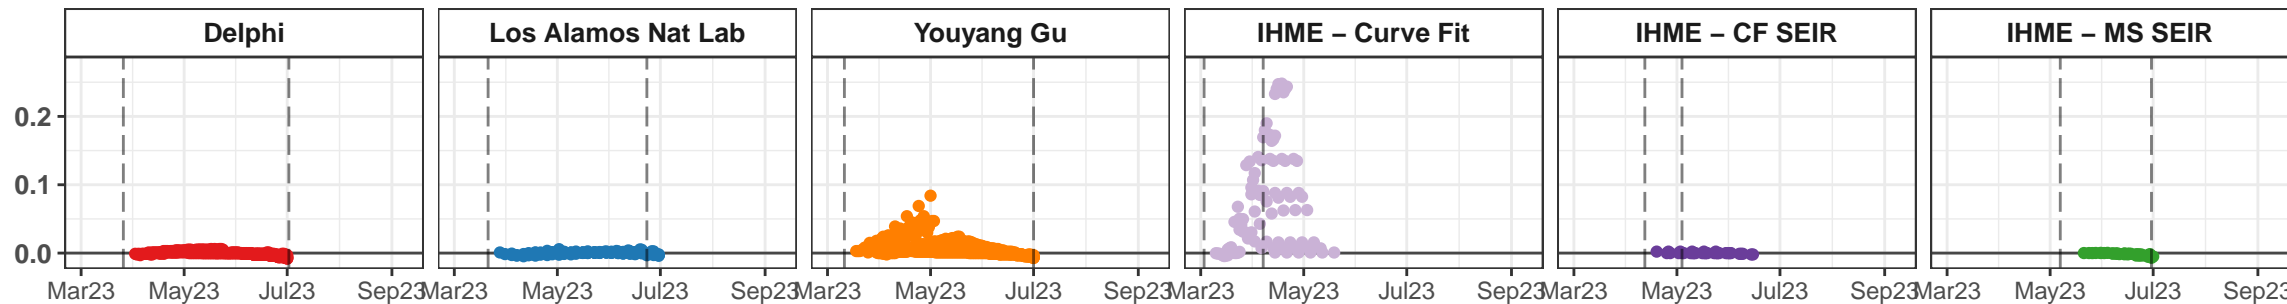

# Wyoming

## Current Forecast

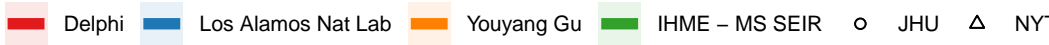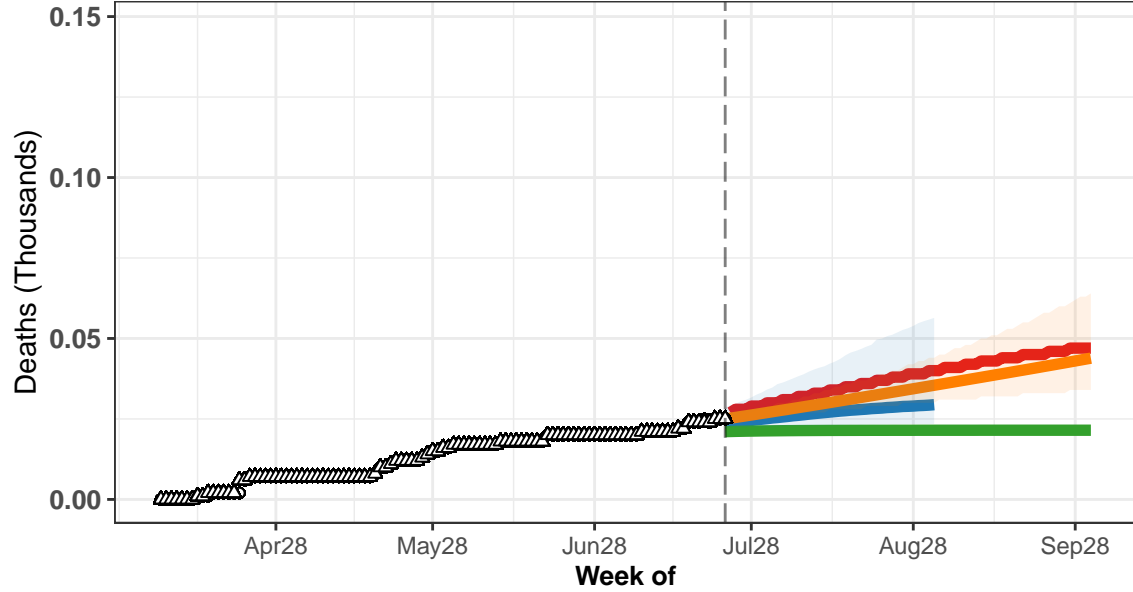

## Cumulative Out-Of-Sample Error (Post Intercept Shift)

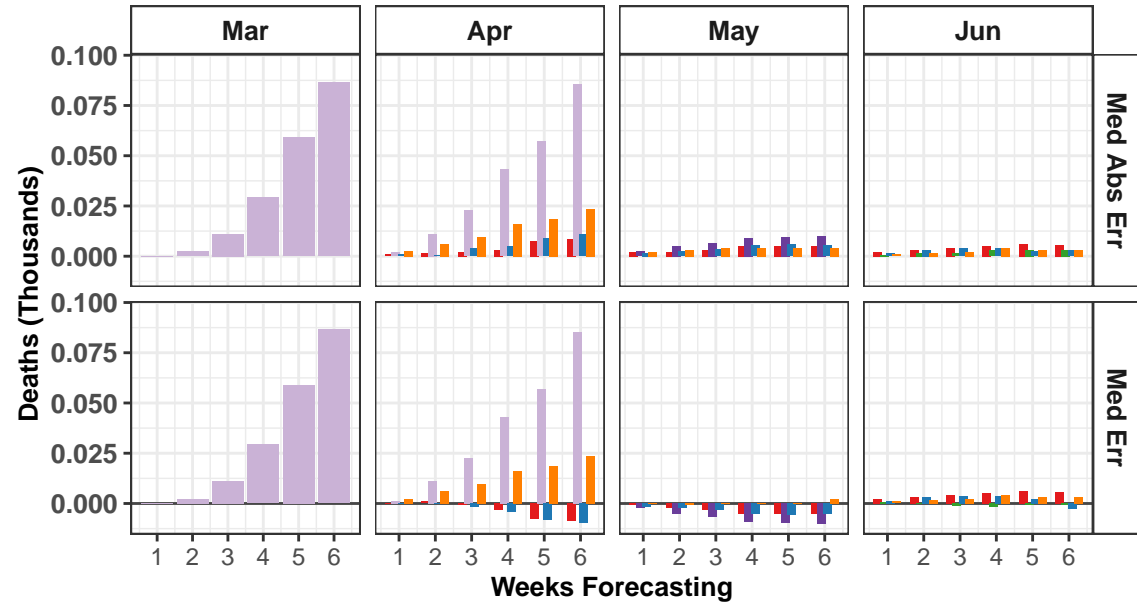

## All Model Versions

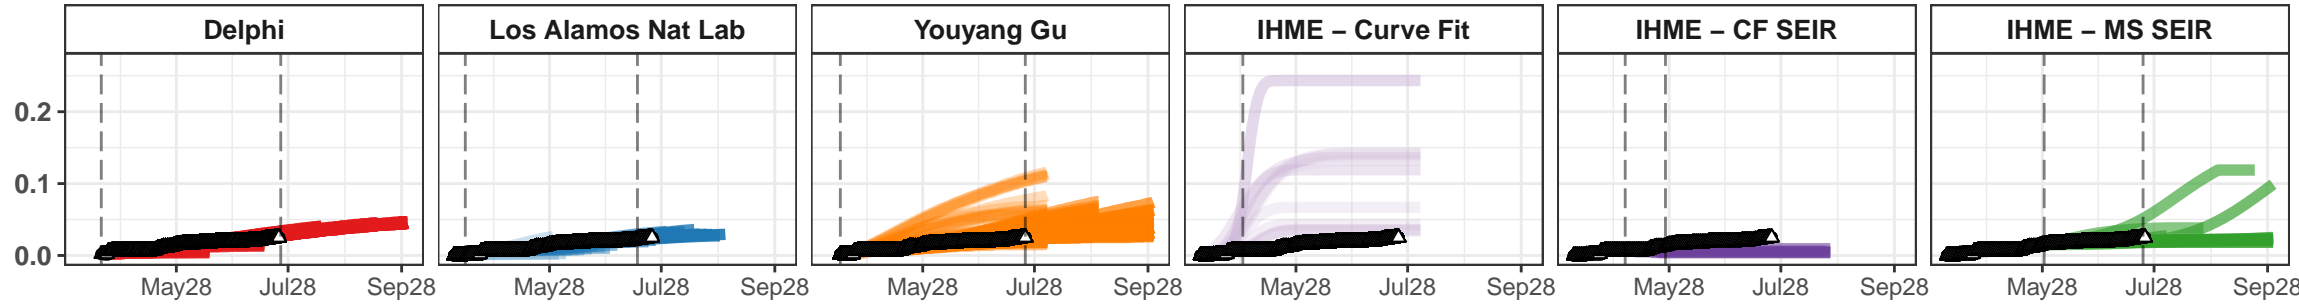

## All Cumulative Errors

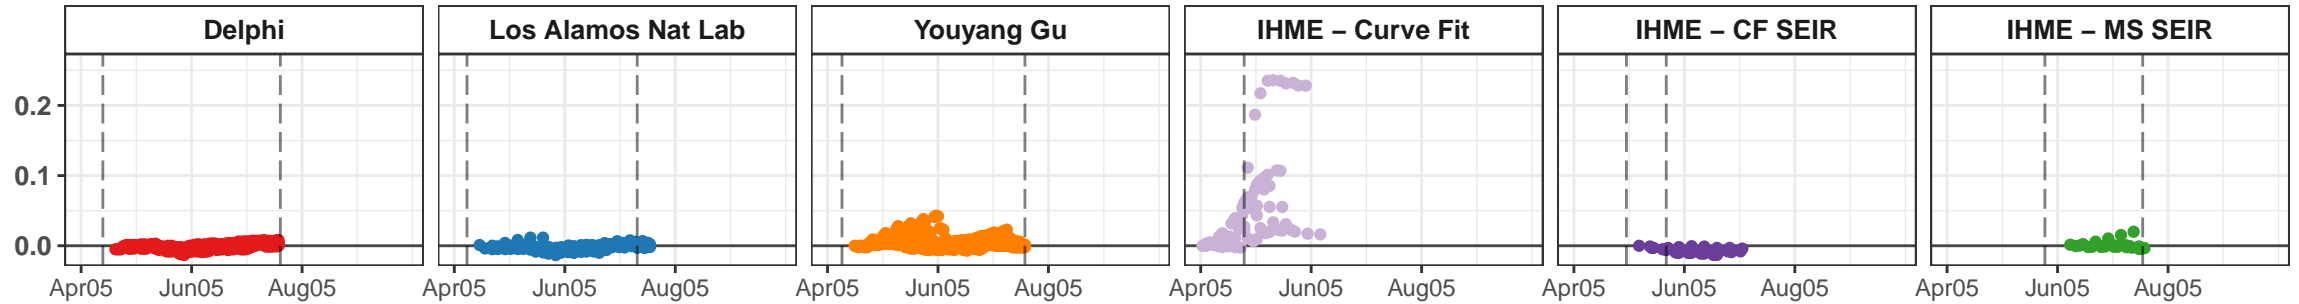



# Suriname

## Current Forecast

Delphi Imperial IHME – MS SEIR

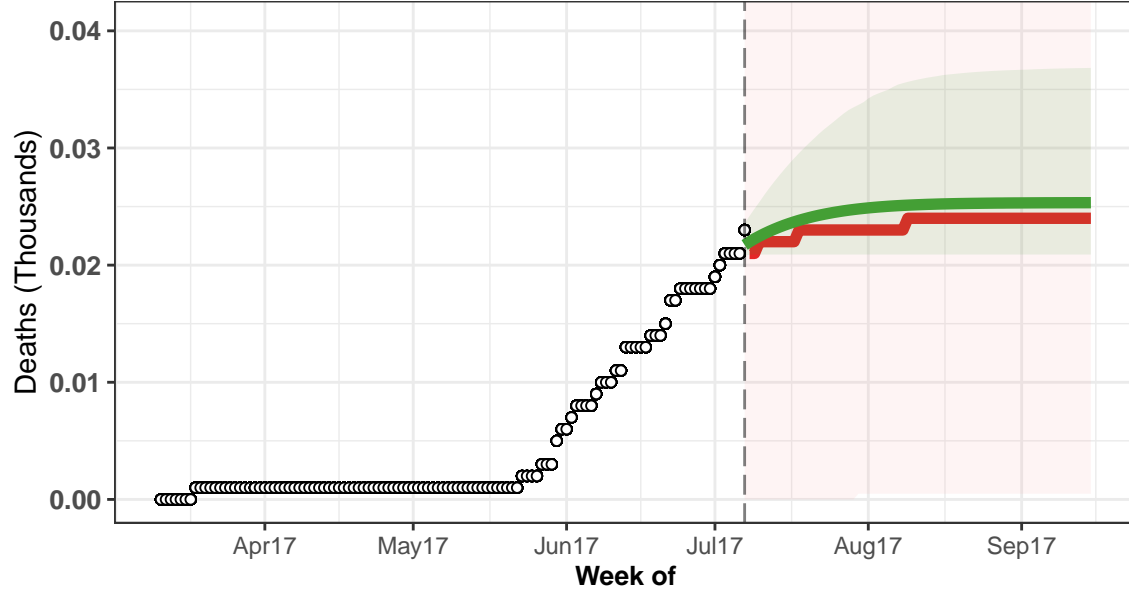

## Cumulative Out-Of-Sample Error (Post Intercept Shift)

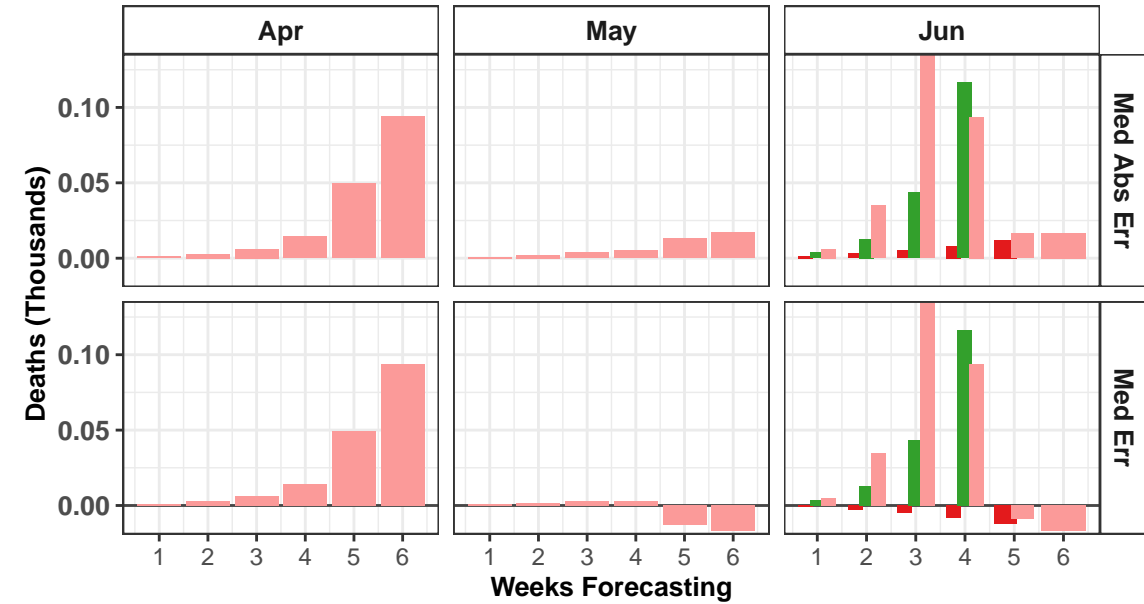

## All Model Versions

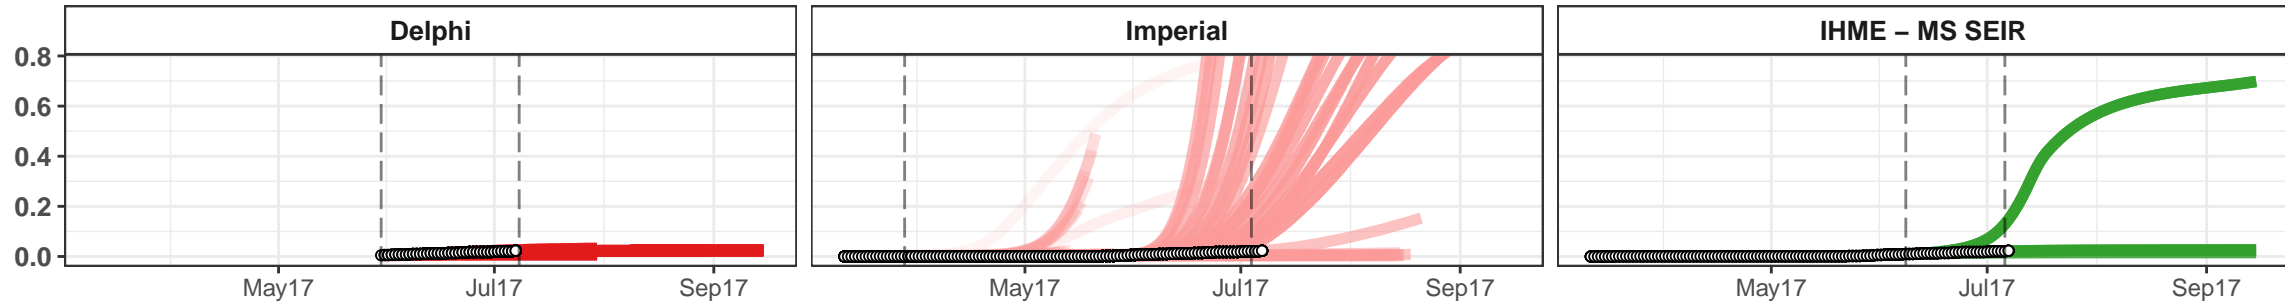

## All Cumulative Errors

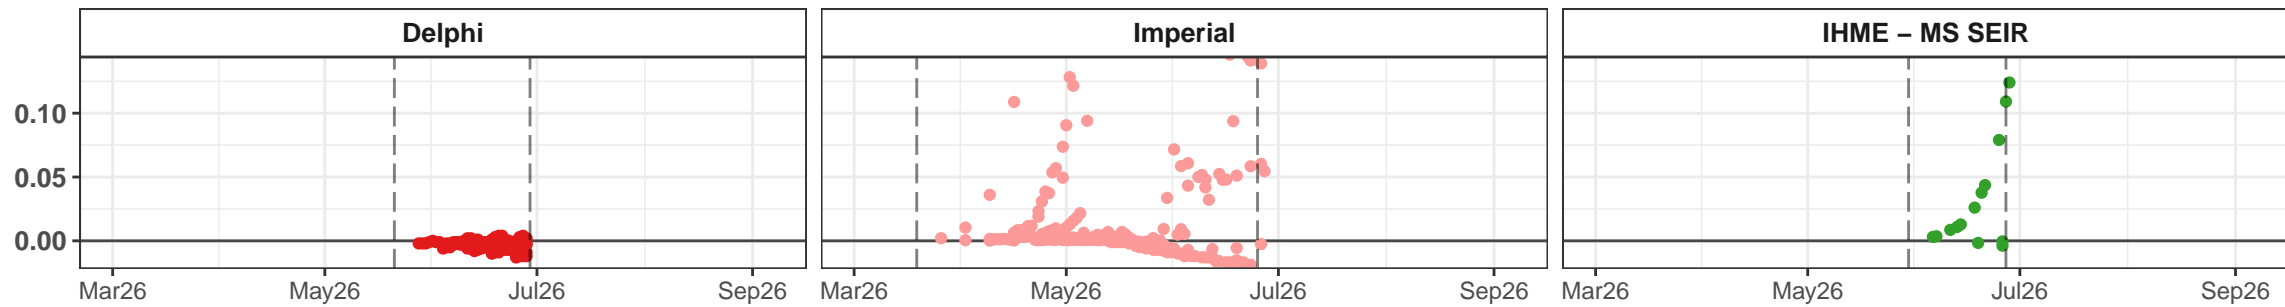

# New Zealand

## Current Forecast

■ Delphi
 ■ Los Alamos Nat Lab
 ■ Imperial
 ■ IHME – MS SEIR

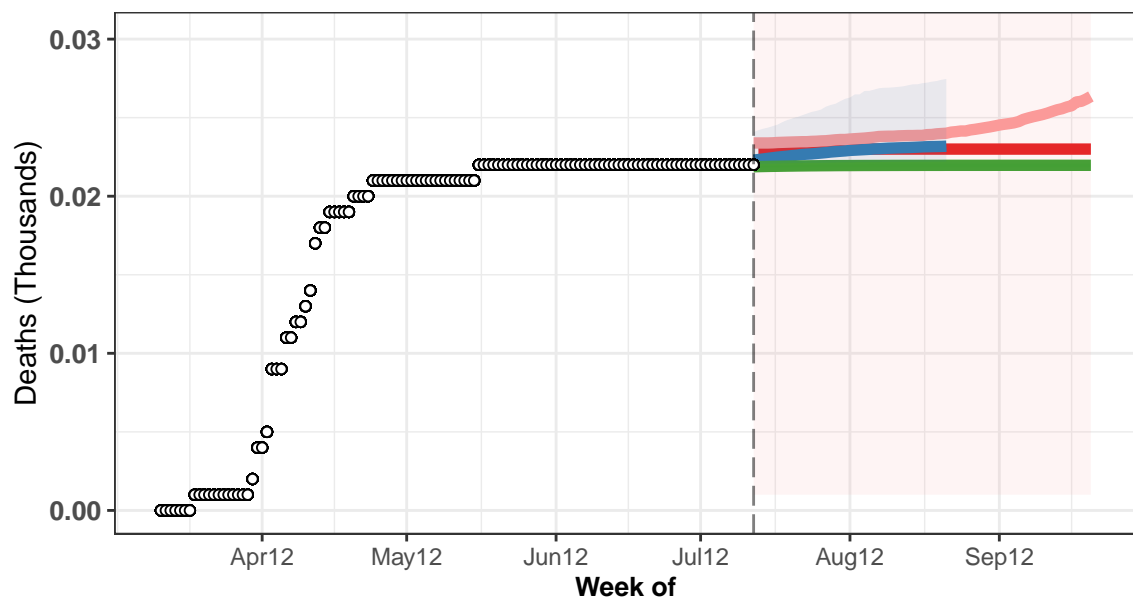

## Cumulative Out-Of-Sample Error (Post Intercept Shift)

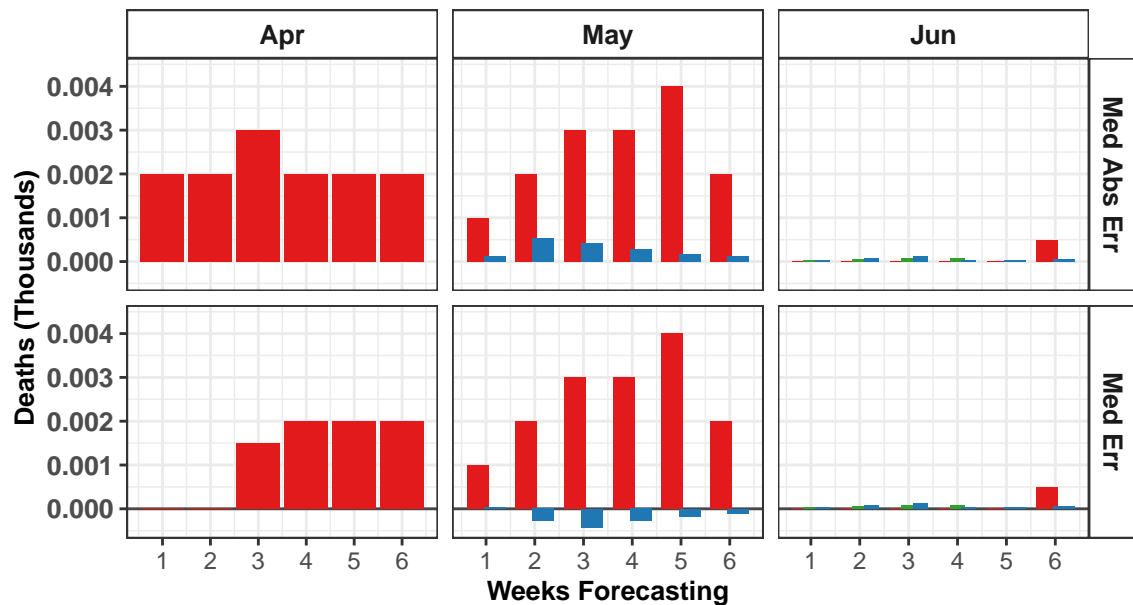

## All Model Versions

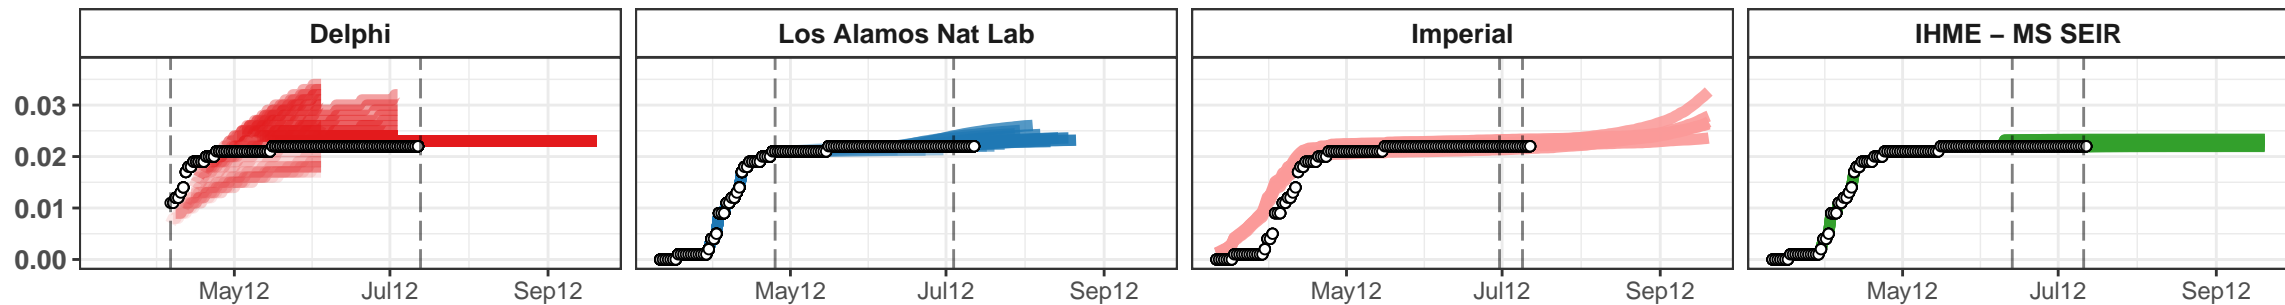

## All Cumulative Errors

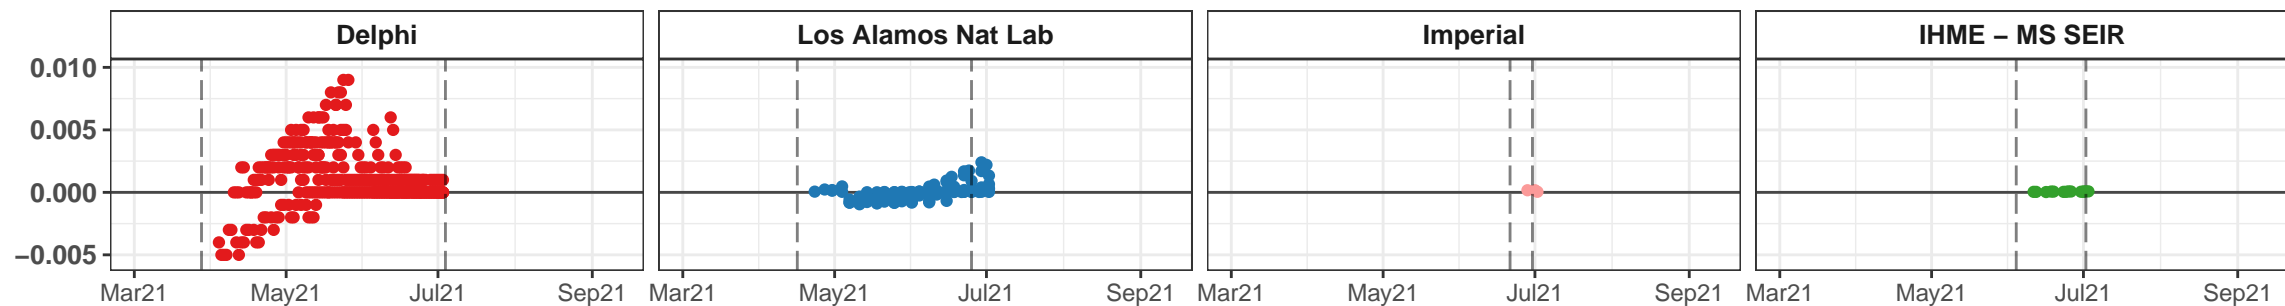

# Cape Verde

## Current Forecast

Delphi Imperial IHME – MS SEIR

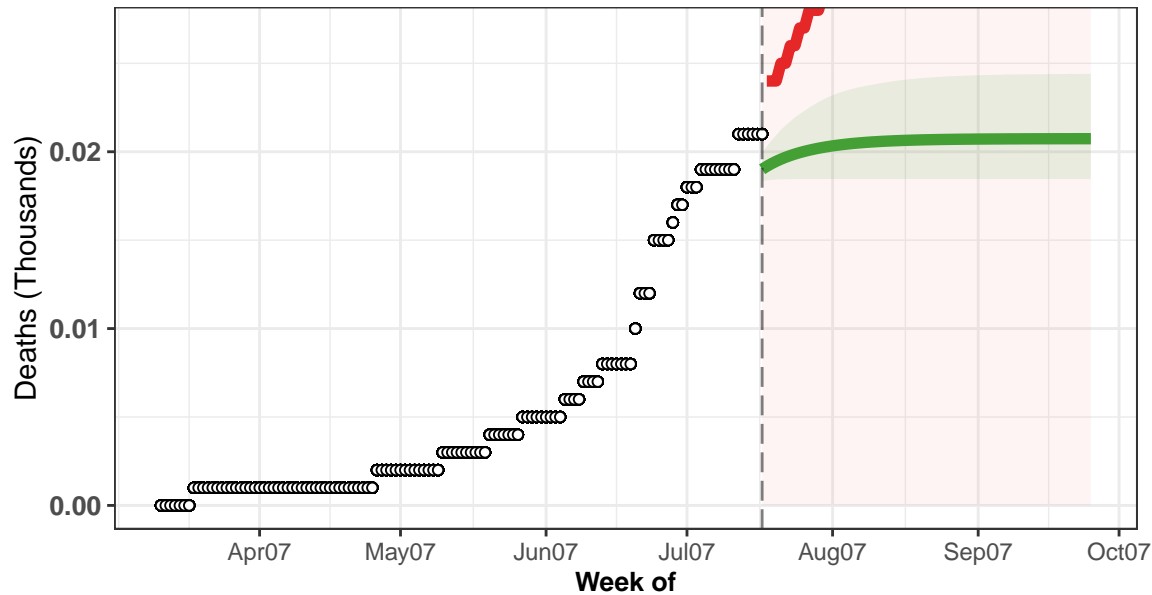

## Cumulative Out-Of-Sample Error (Post Intercept Shift)

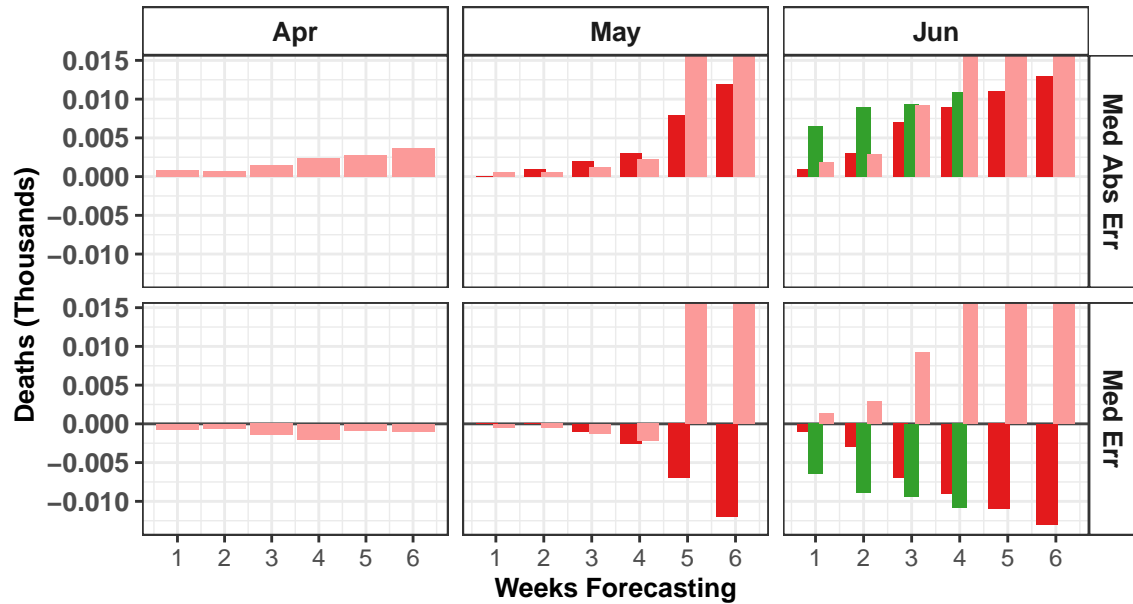

## All Model Versions

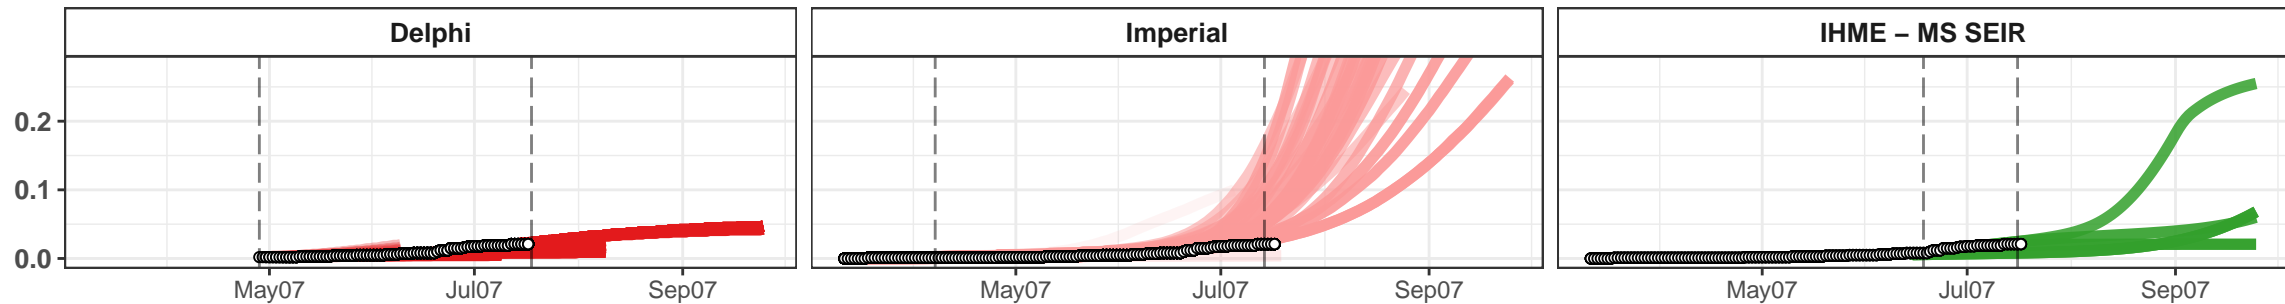

## All Cumulative Errors

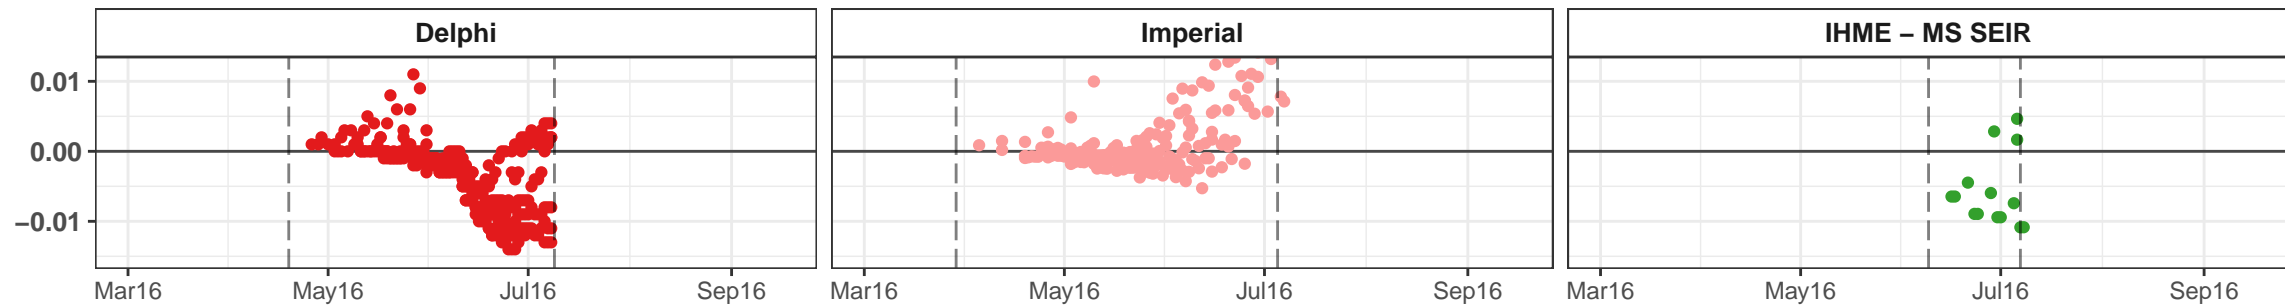

# Tanzania

## Current Forecast

Delphi Los Alamos Nat Lab Imperial

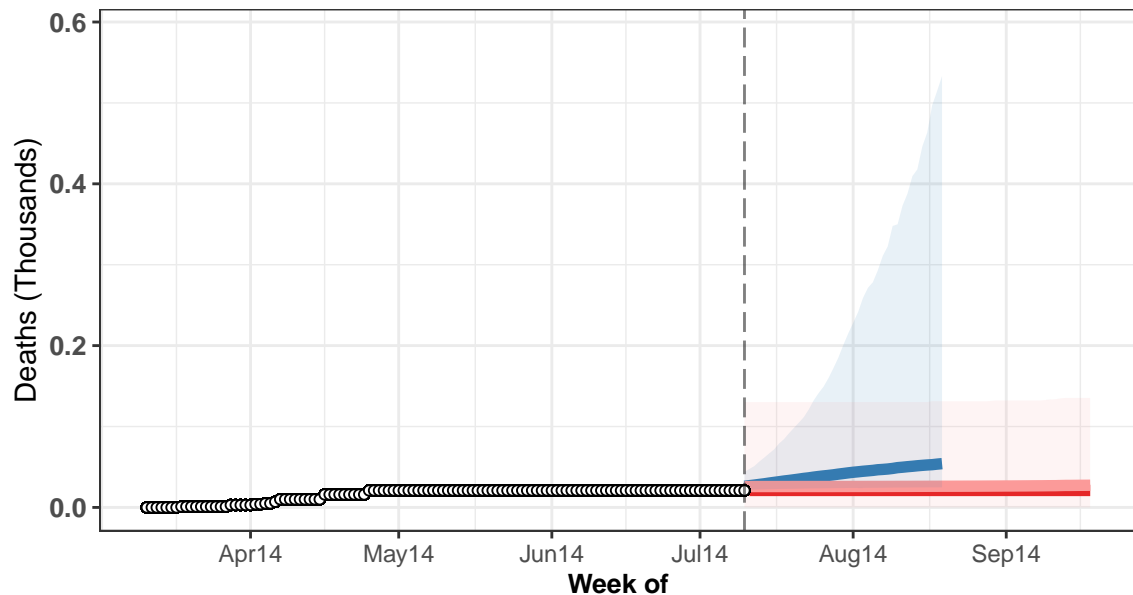

## Cumulative Out-Of-Sample Error (Post Intercept Shift)

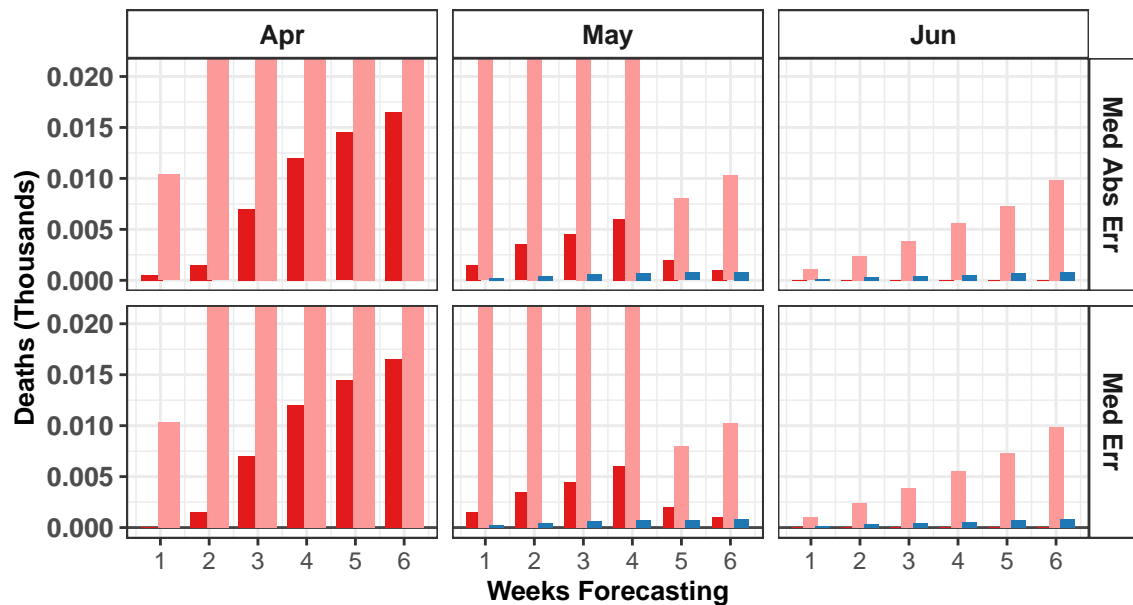

## All Model Versions

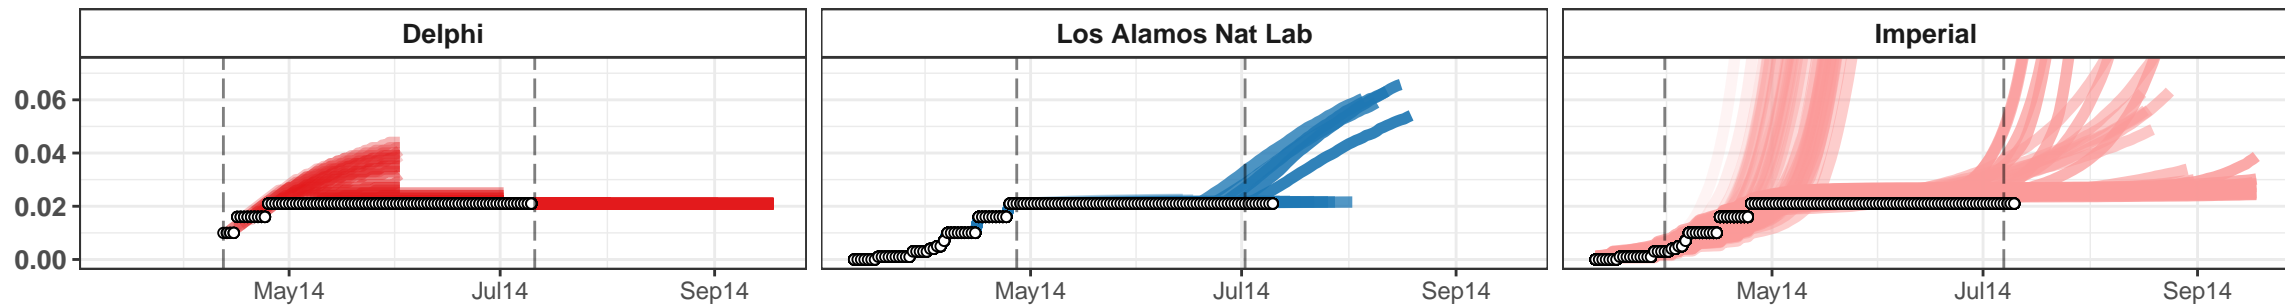

## All Cumulative Errors

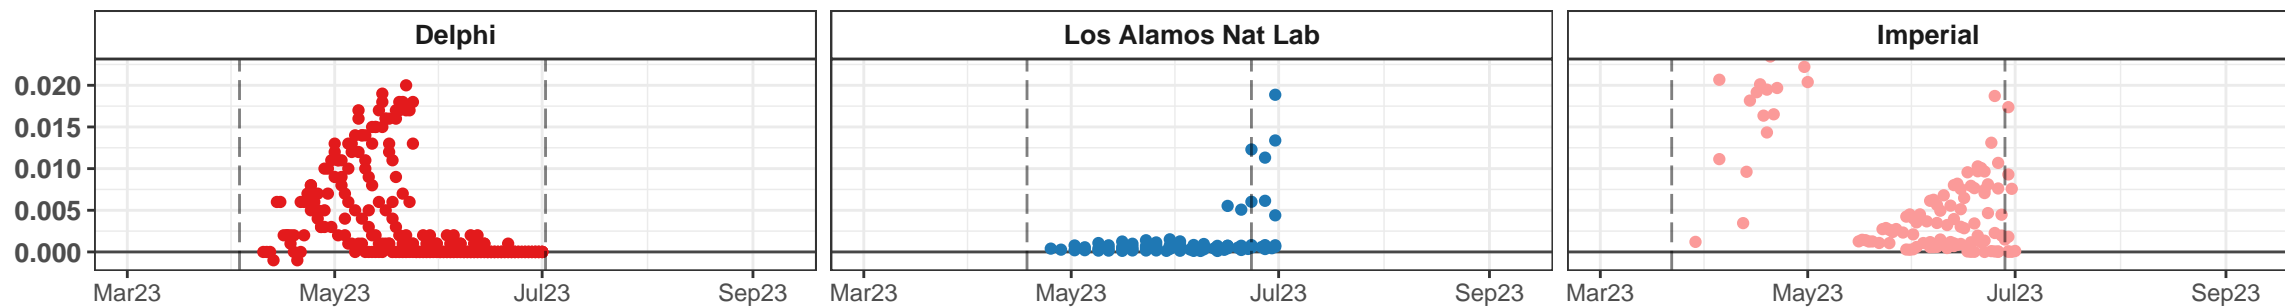

# Cyprus

## Current Forecast

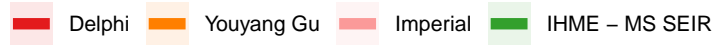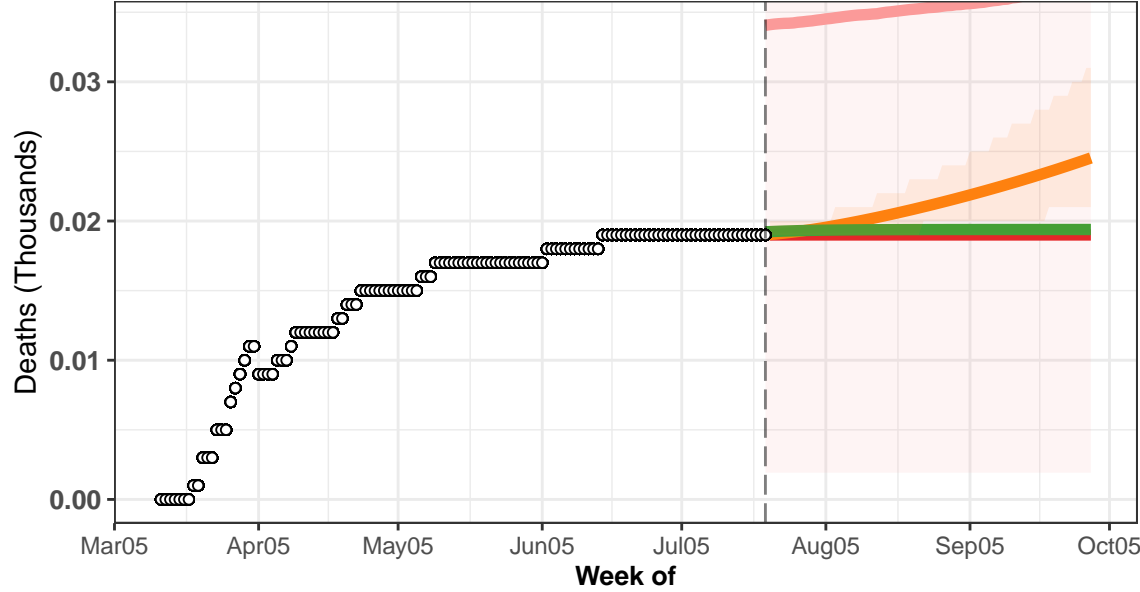

## Cumulative Out-Of-Sample Error (Post Intercept Shift)

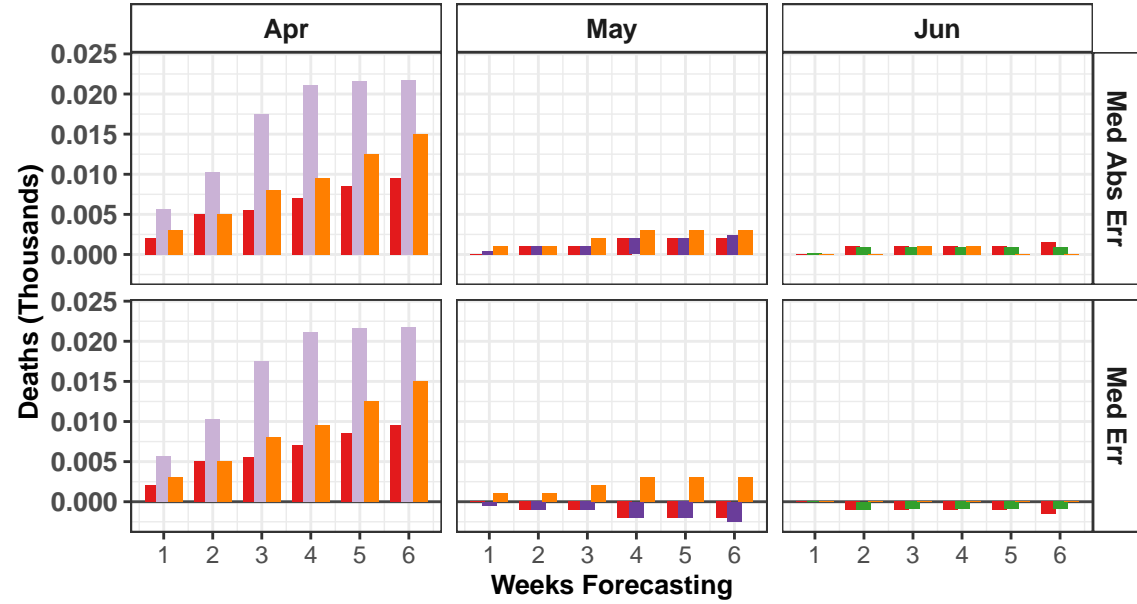

## All Model Versions

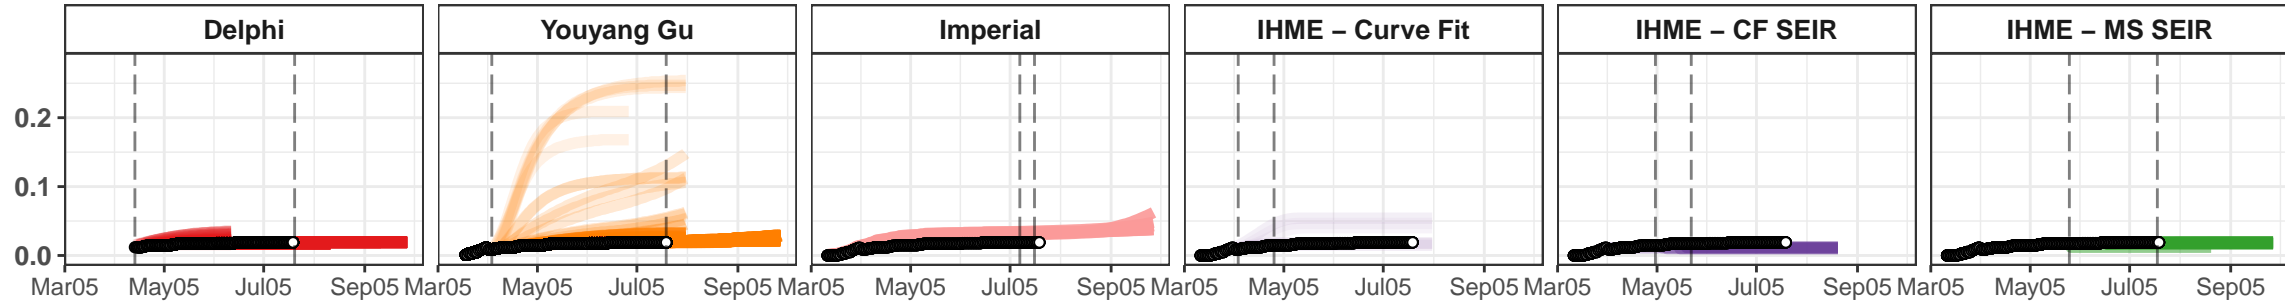

## All Cumulative Errors

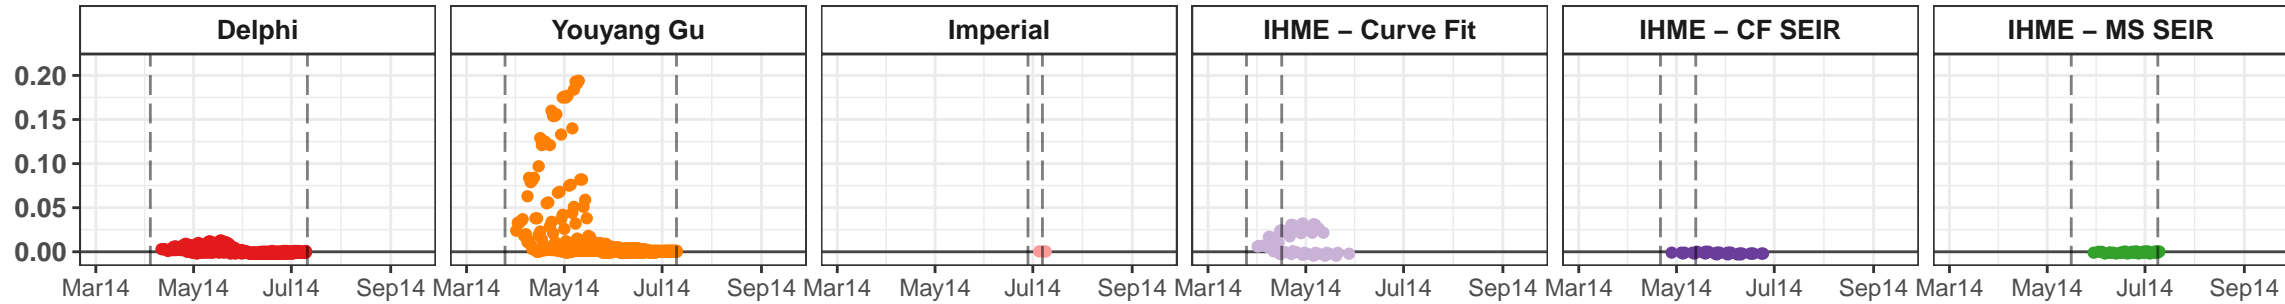

# Guyana

## Current Forecast

Delphi Imperial IHME - MS SEIR

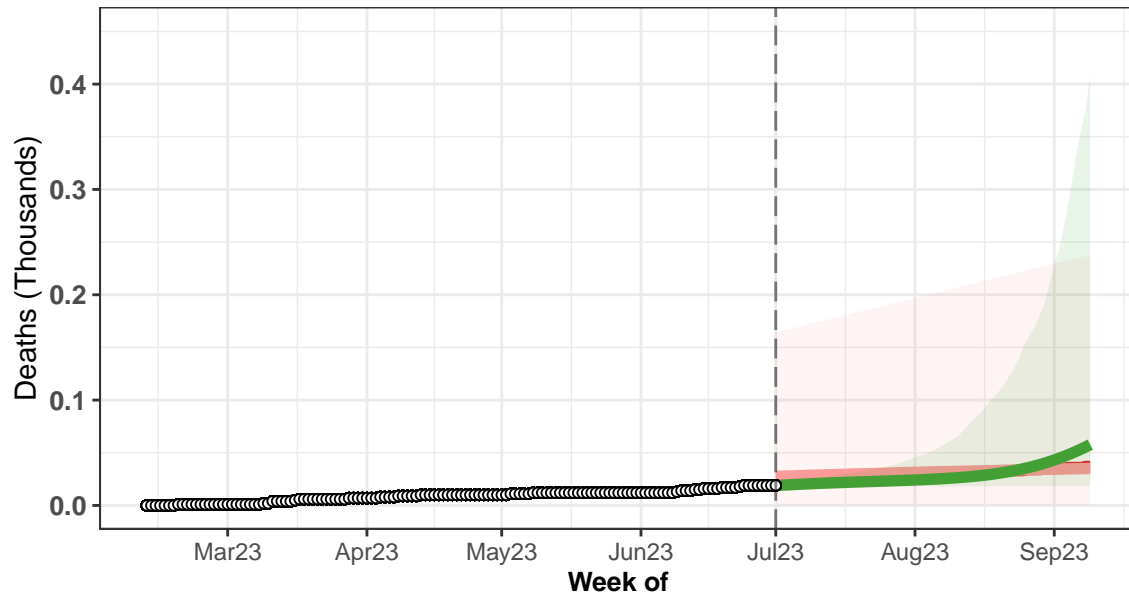

## Cumulative Out-Of-Sample Error (Post Intercept Shift)

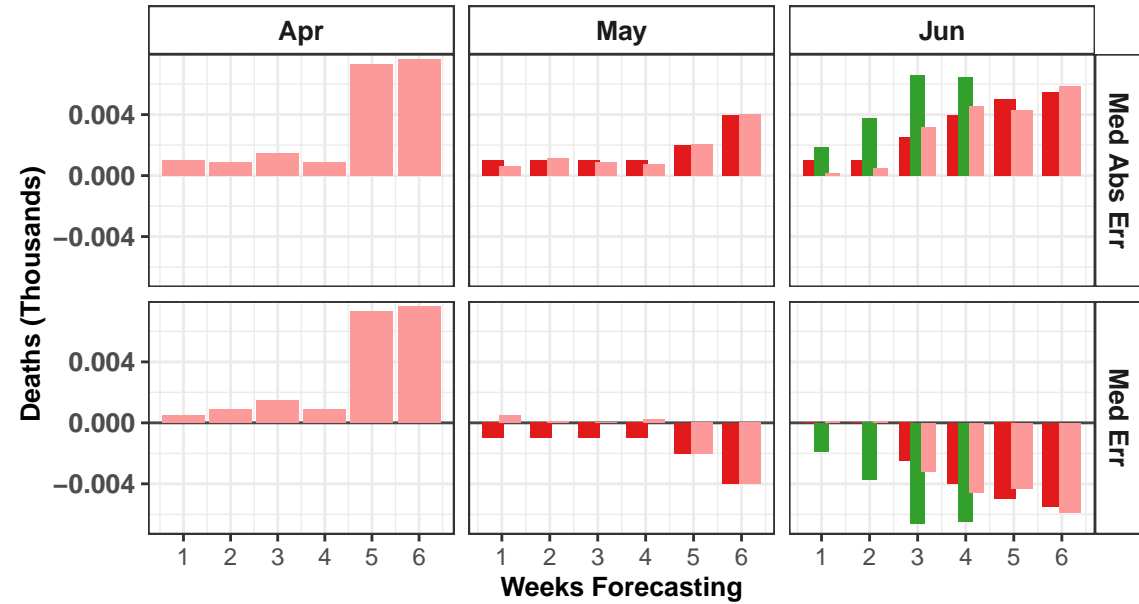

## All Model Versions

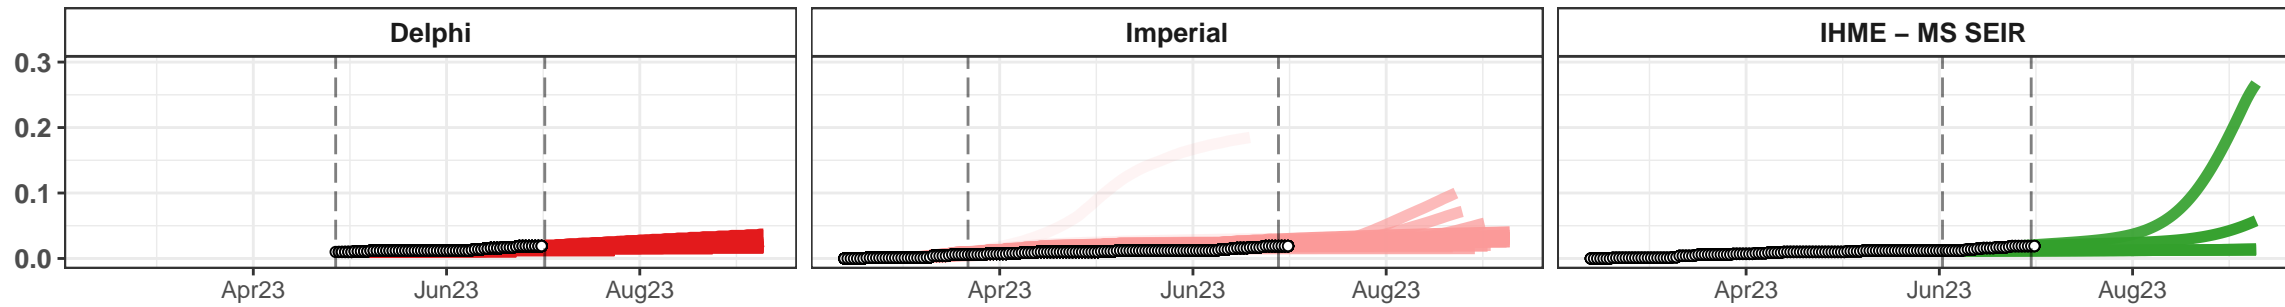

## All Cumulative Errors

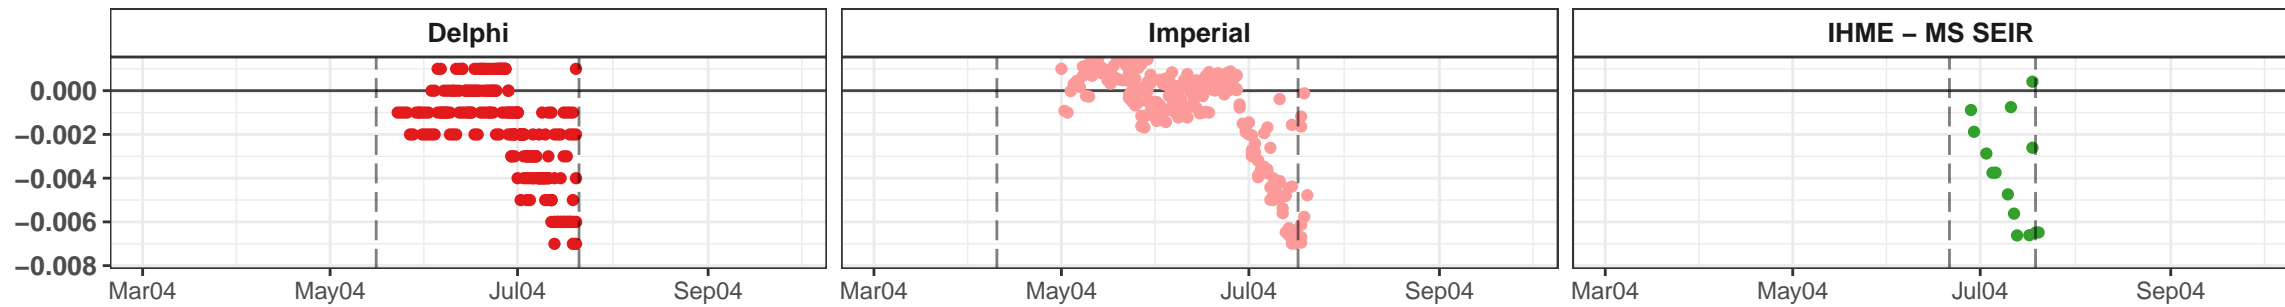

# Alaska

## Current Forecast

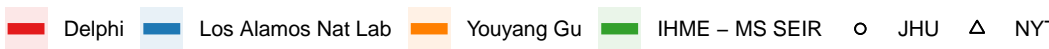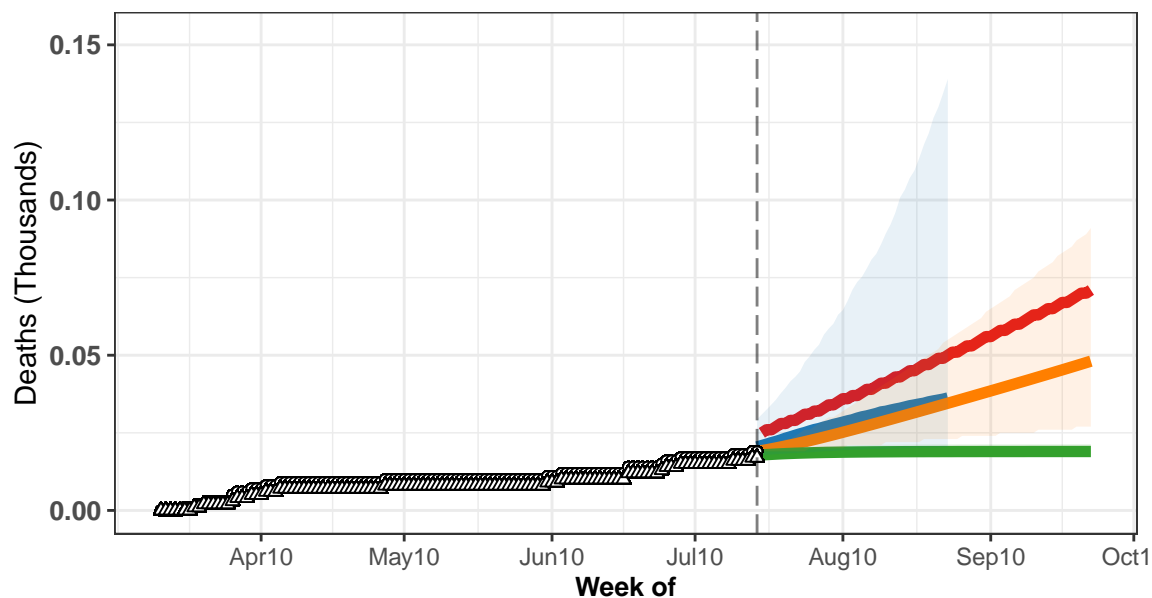

## Cumulative Out-Of-Sample Error (Post Intercept Shift)

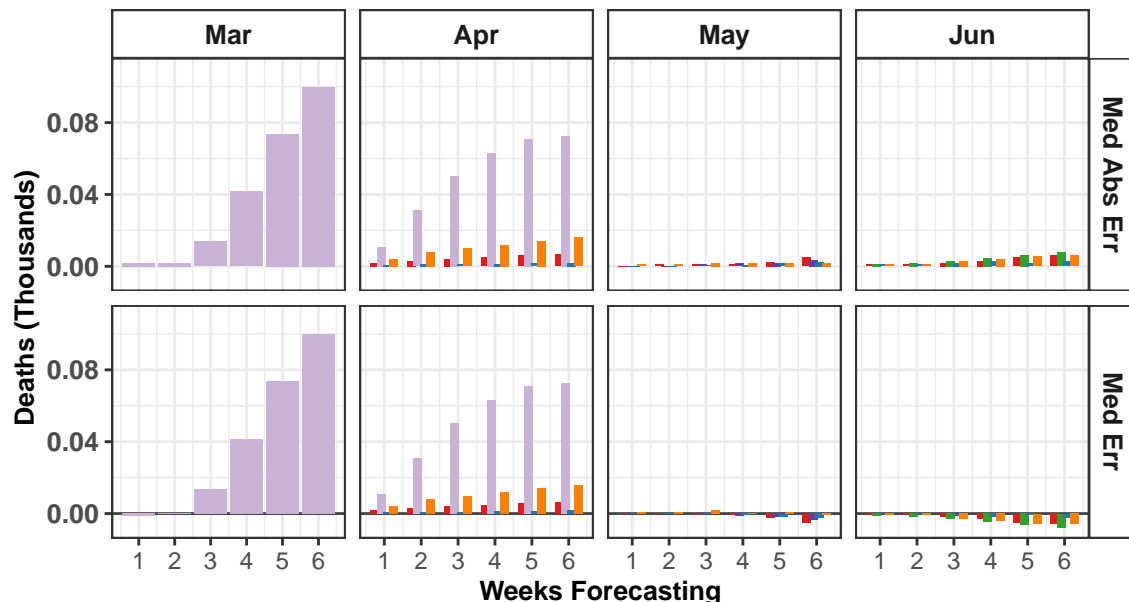

## All Model Versions

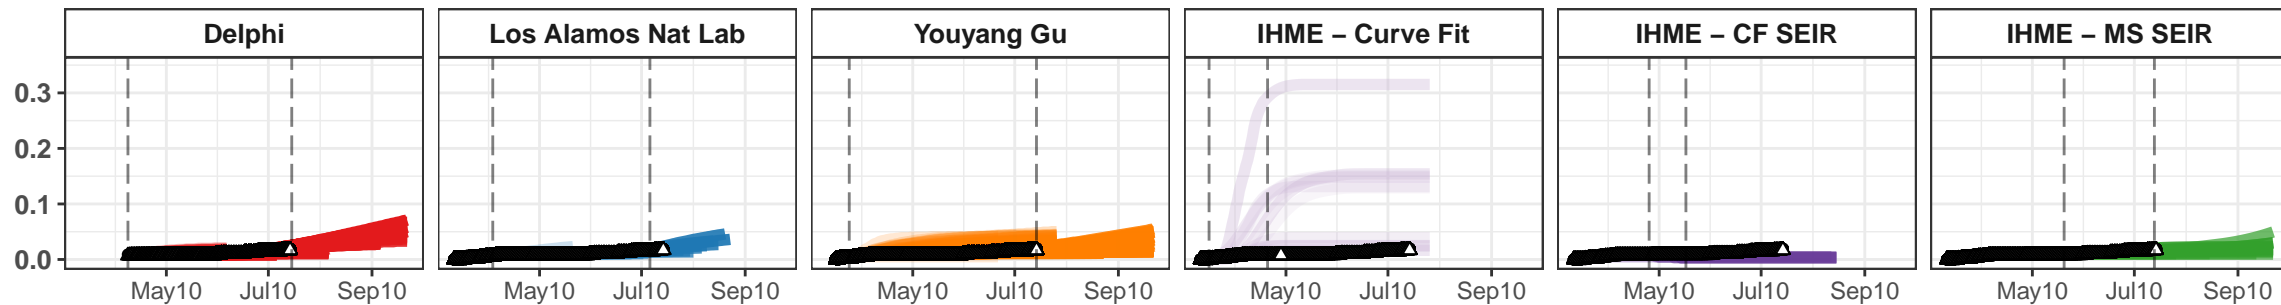

## All Cumulative Errors

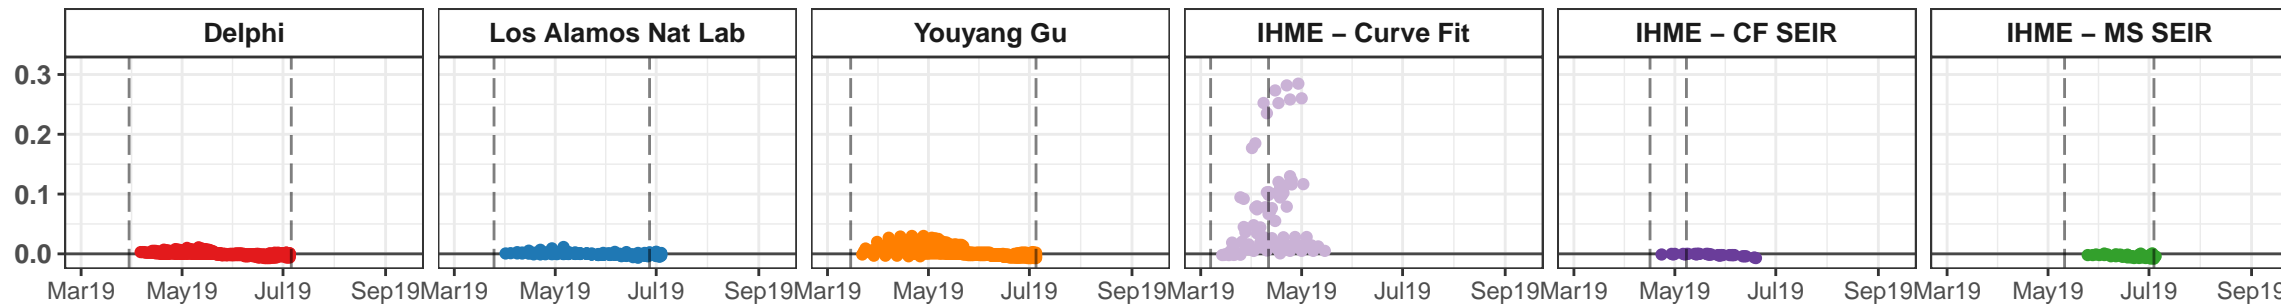

# Georgia (Country)

## Current Forecast

Delphi Imperial IHME – MS SEIR

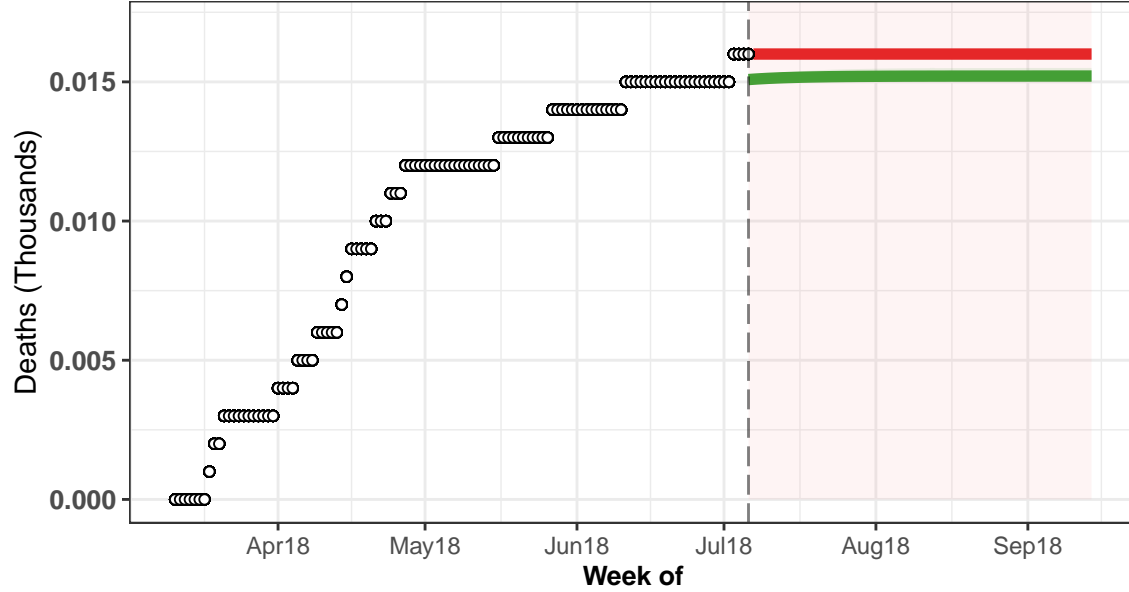

## Cumulative Out-Of-Sample Error (Post Intercept Shift)

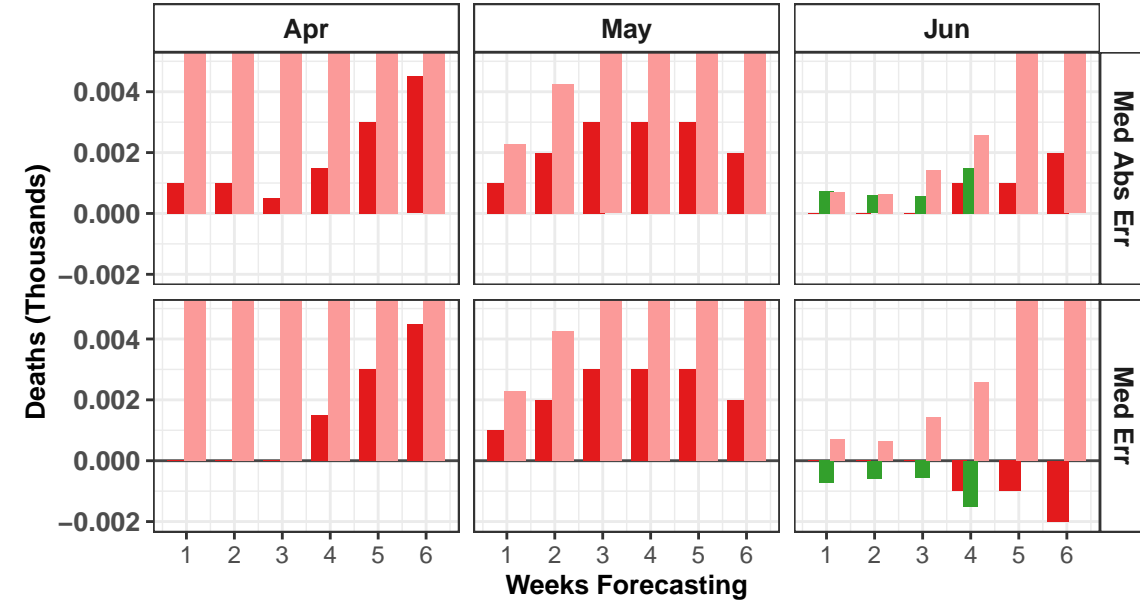

## All Model Versions

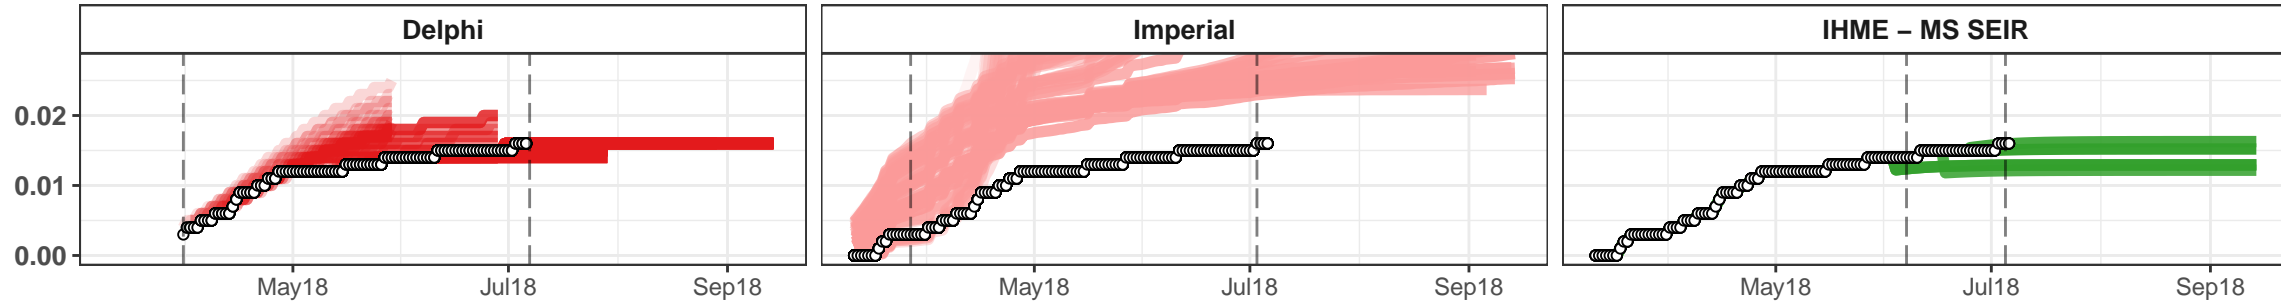

## All Cumulative Errors

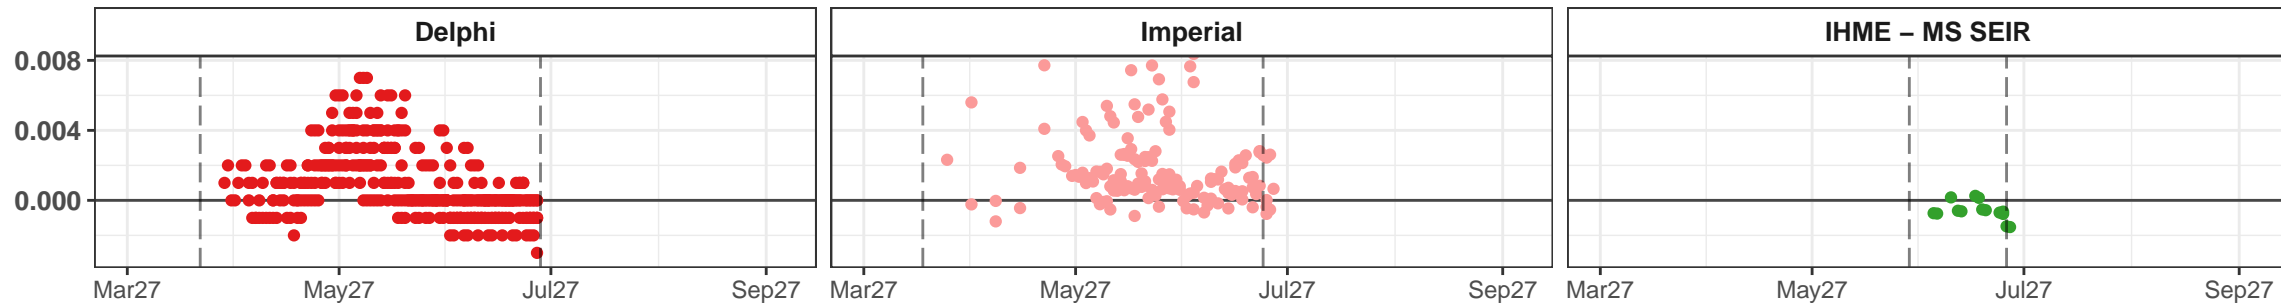



# Togo

## Current Forecast

Delphi Imperial IHME – MS SEIR

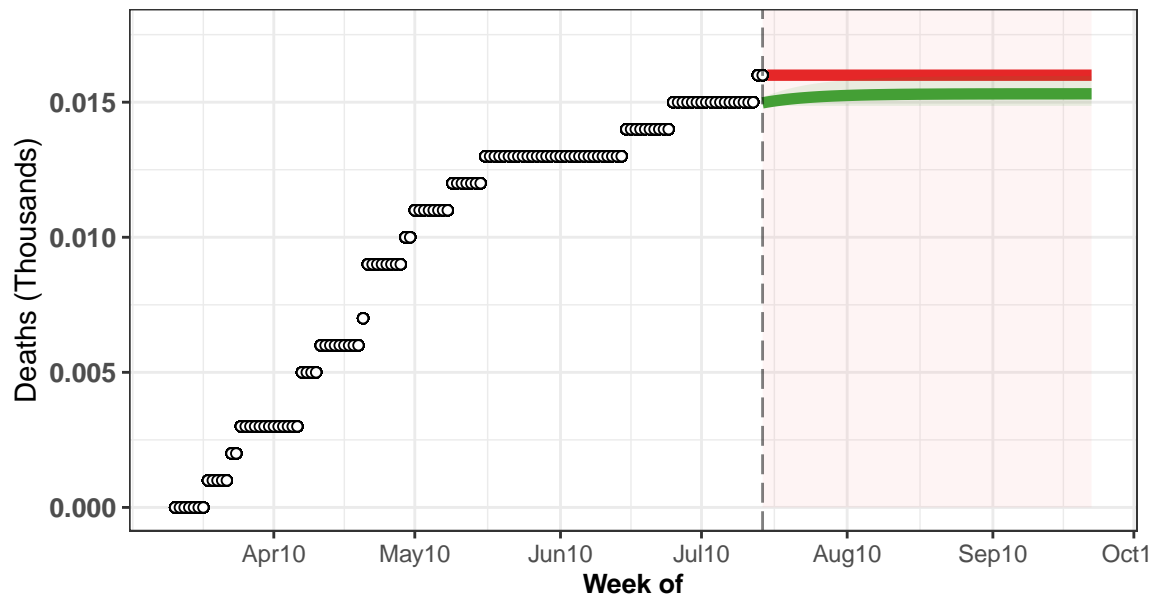

## Cumulative Out-Of-Sample Error (Post Intercept Shift)

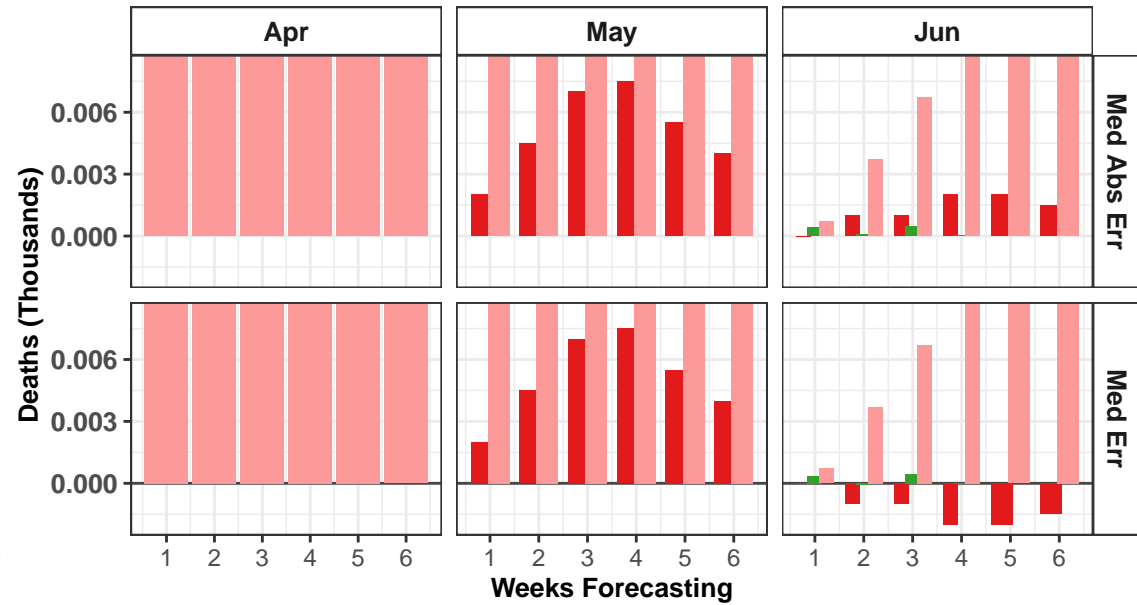

## All Model Versions

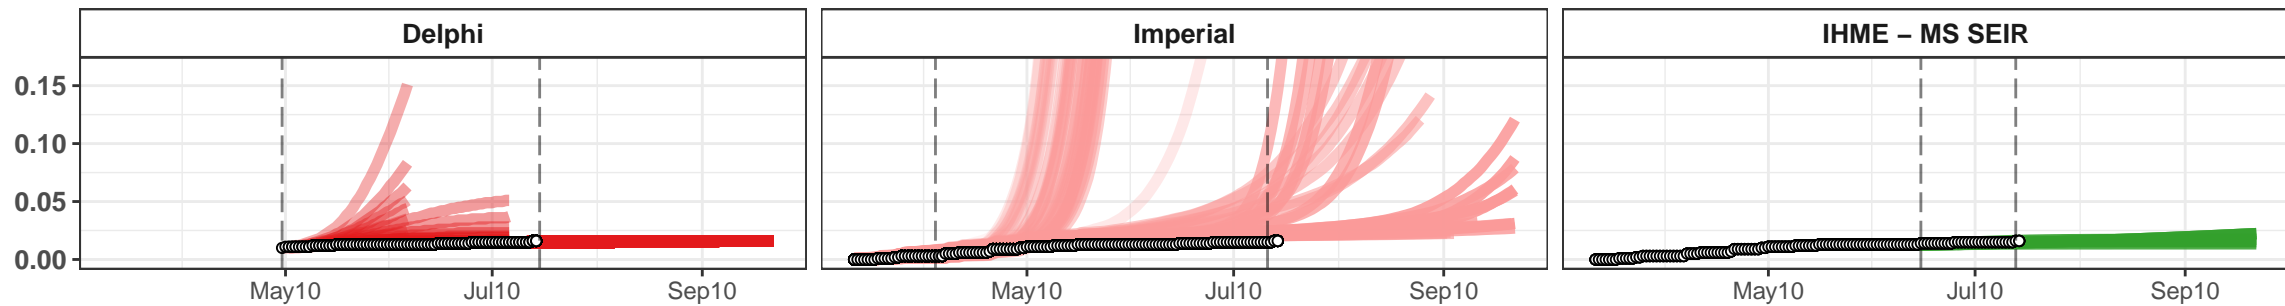

## All Cumulative Errors

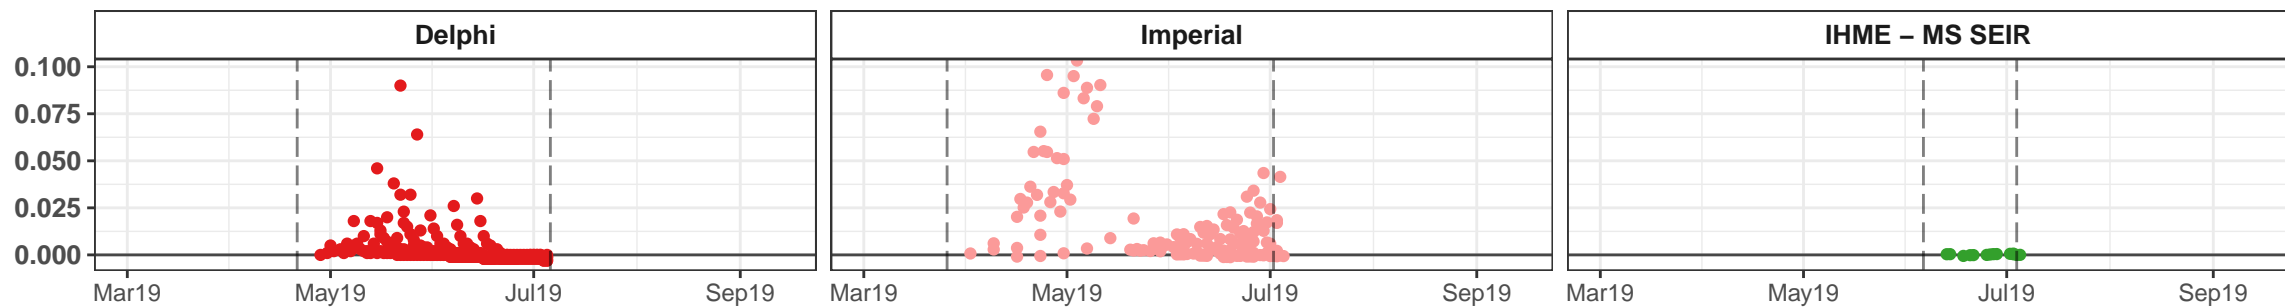

# Maldives

## Current Forecast

Delphi Imperial IHME - MS SEIR

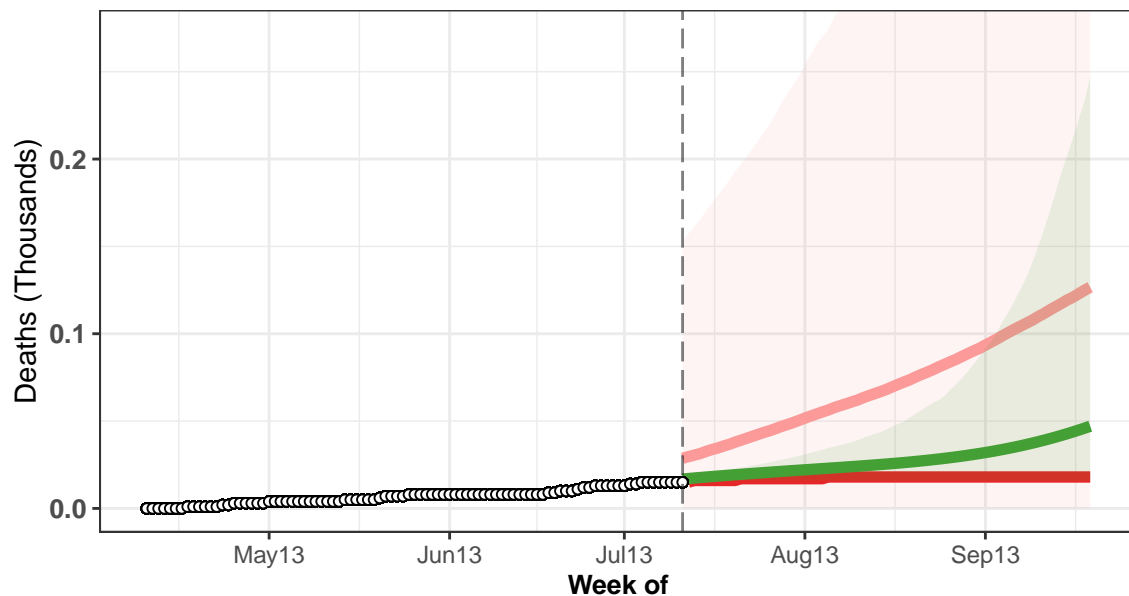

## Cumulative Out-Of-Sample Error (Post Intercept Shift)

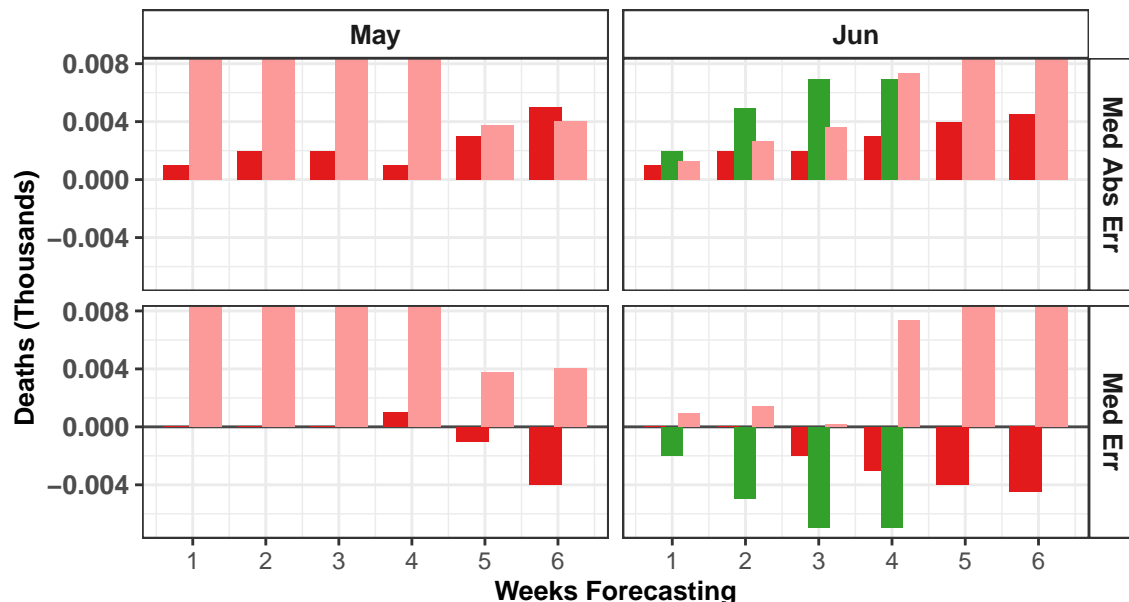

## All Model Versions

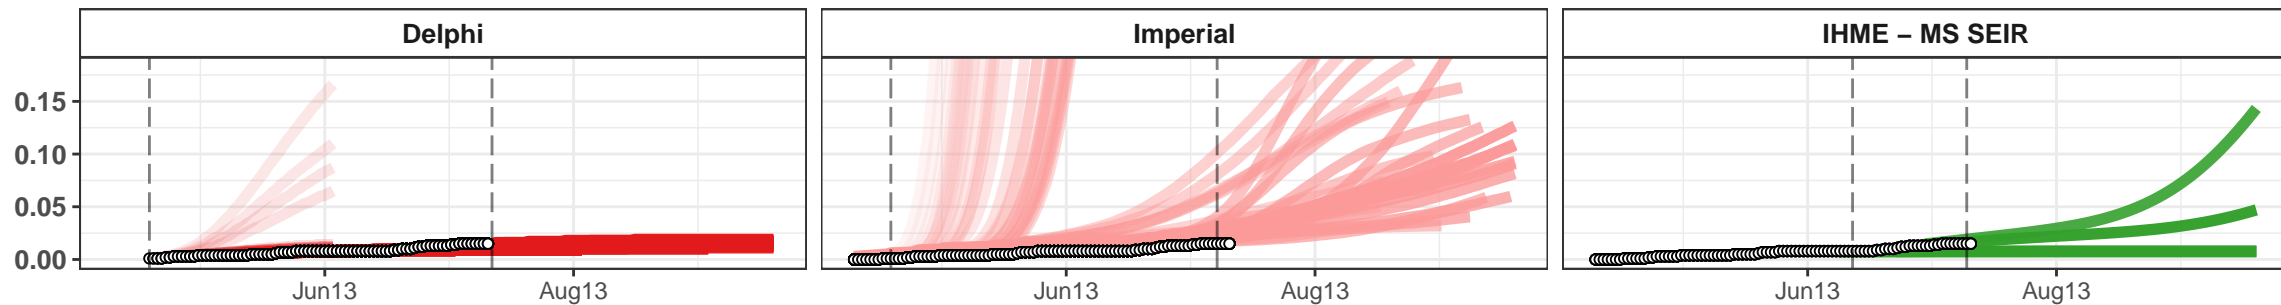

## All Cumulative Errors

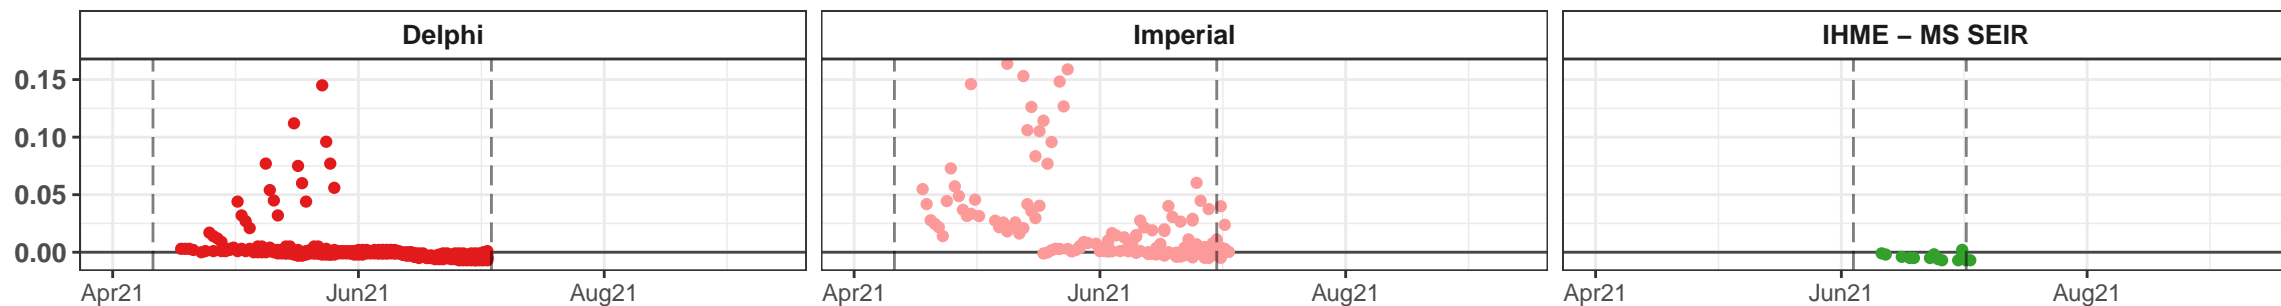

# Sao Tome and Principe

## Current Forecast

Delphi Imperial IHME – MS SEIR

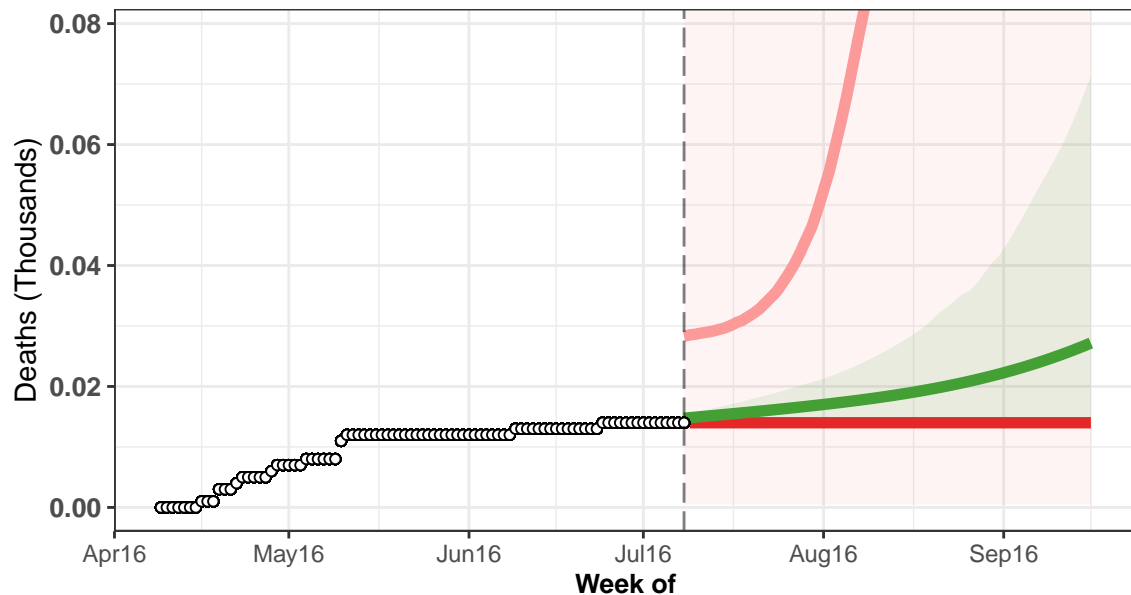

## Cumulative Out-Of-Sample Error (Post Intercept Shift)

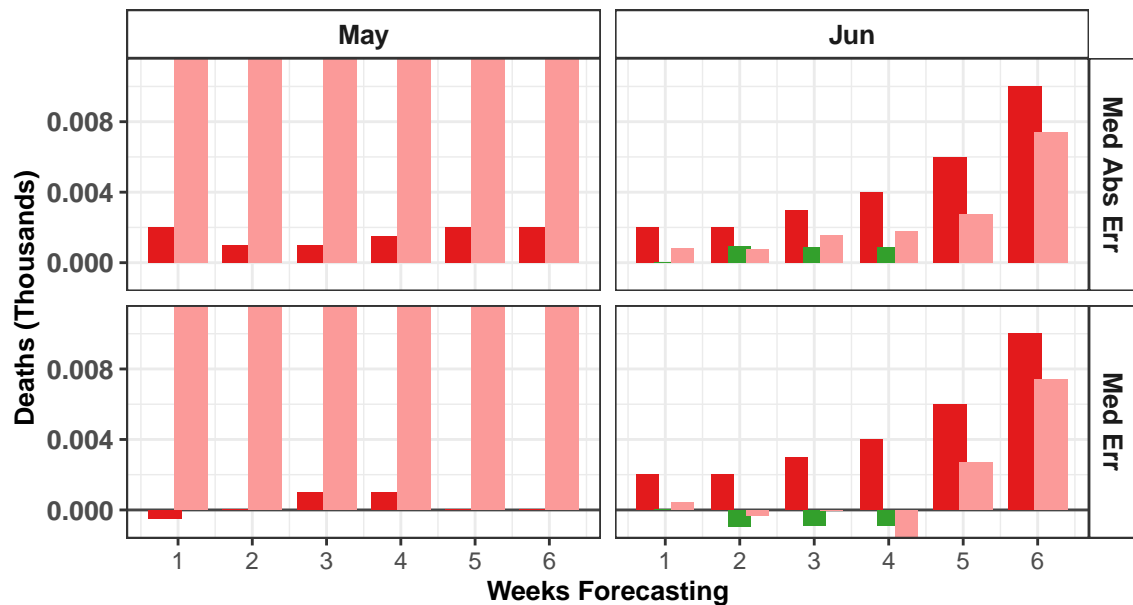

## All Model Versions

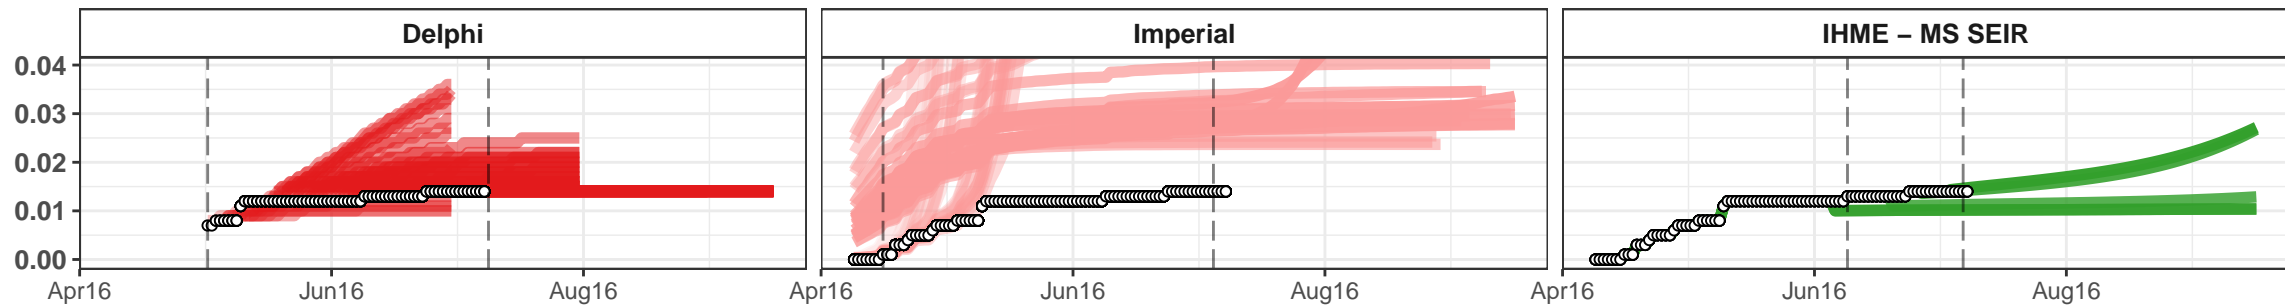

## All Cumulative Errors

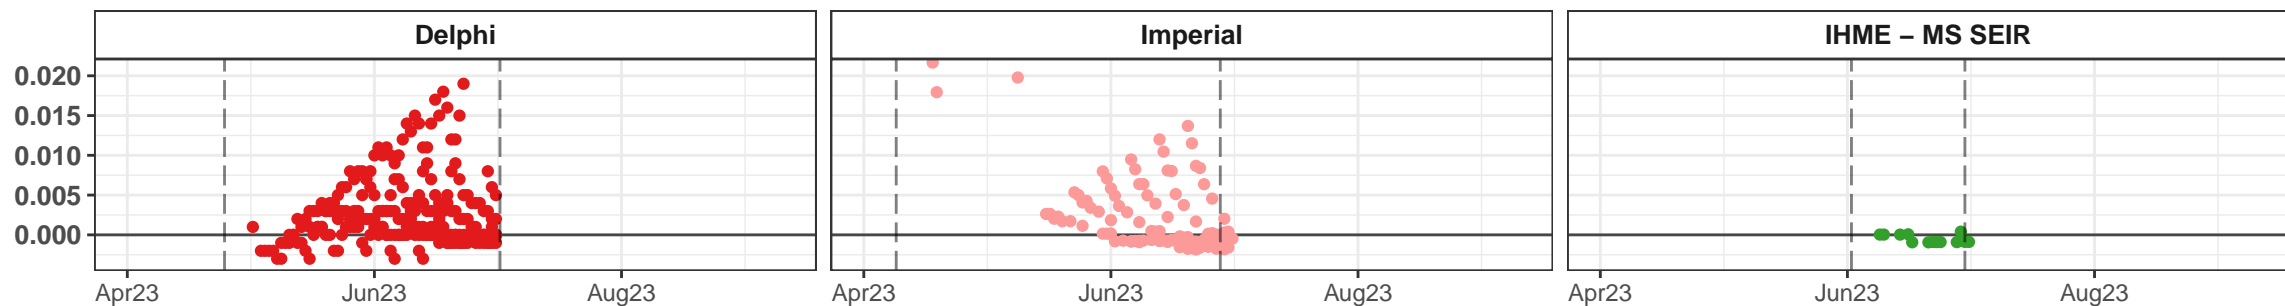

# Jordan

## Current Forecast

Delphi Imperial IHME – MS SEIR

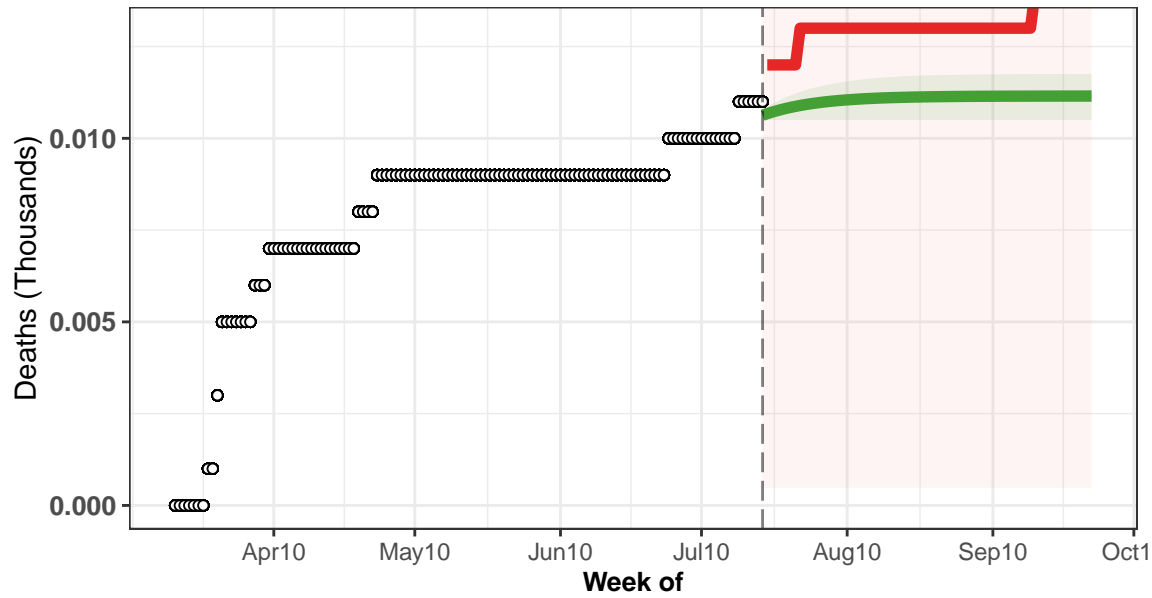

## Cumulative Out-Of-Sample Error (Post Intercept Shift)

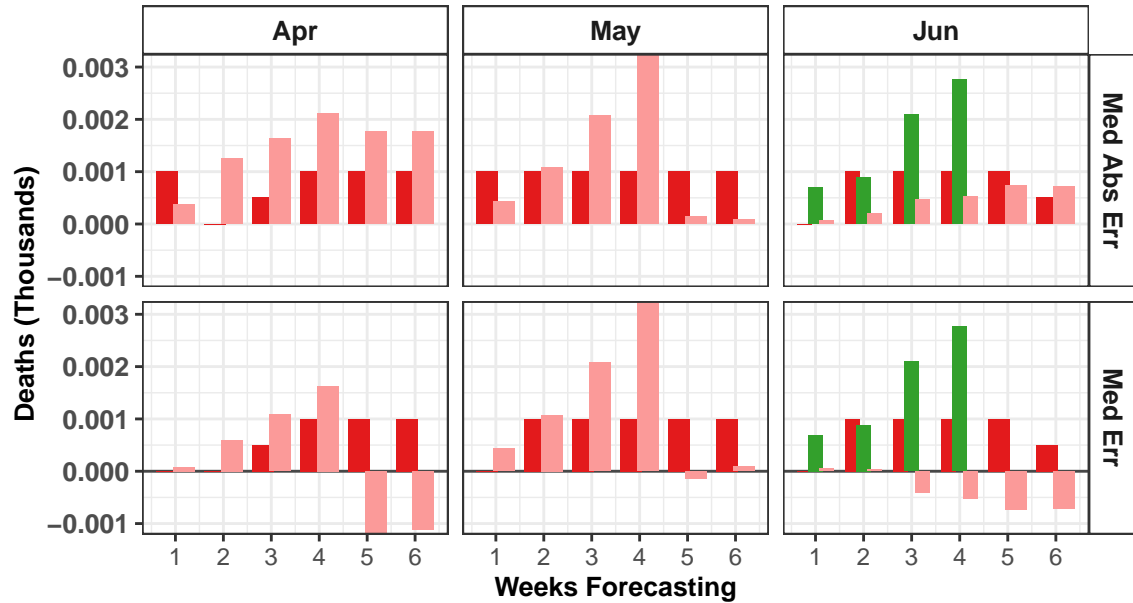

## All Model Versions

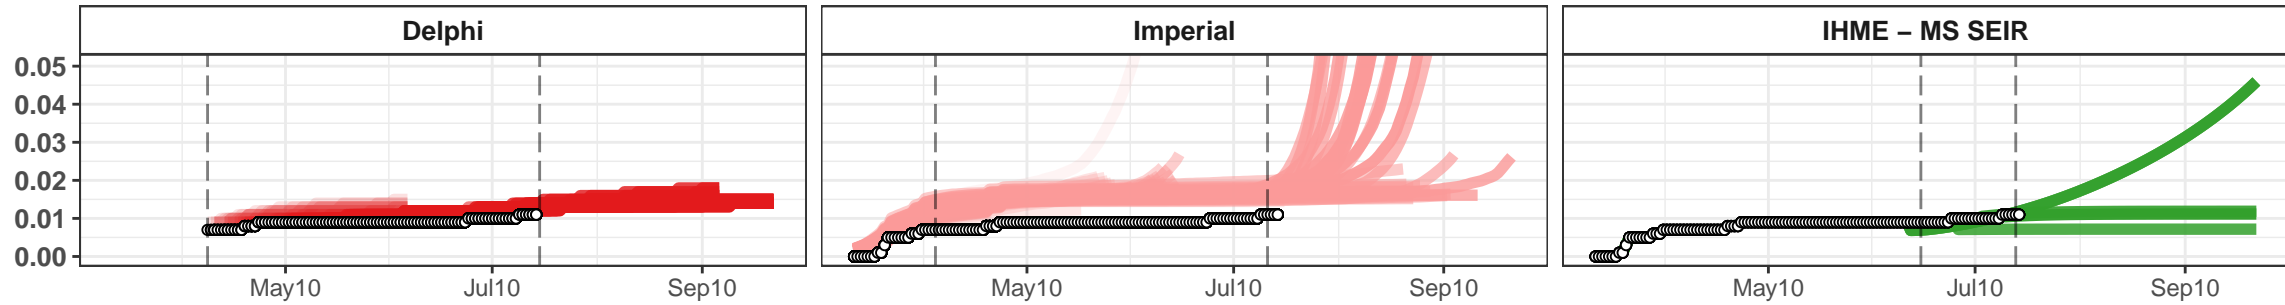

## All Cumulative Errors

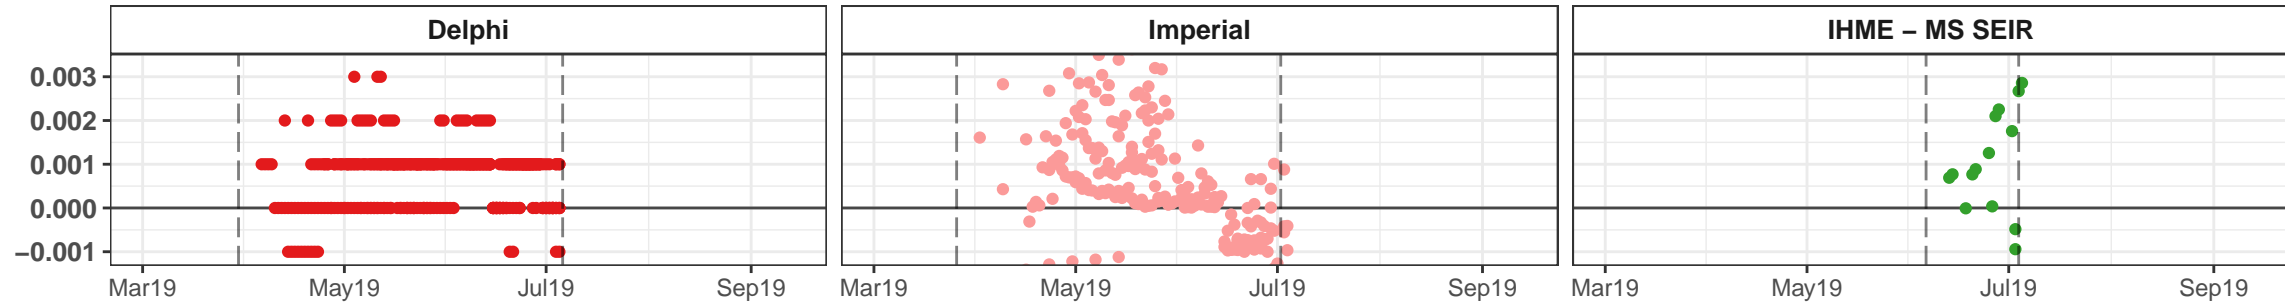

# Mozambique

## Current Forecast

Delphi Imperial IHME – MS SEIR

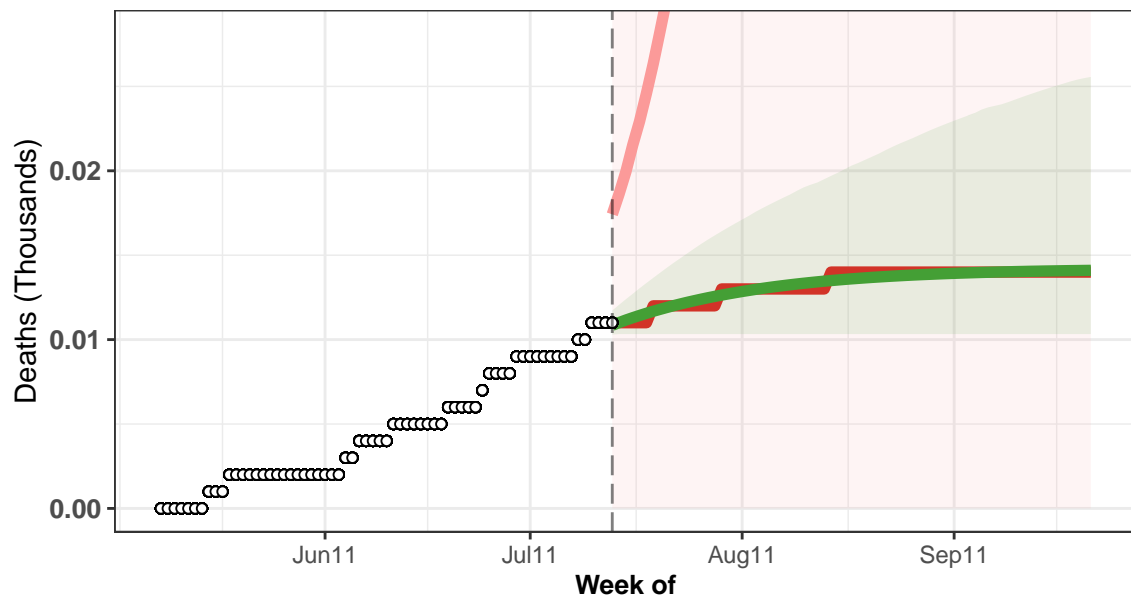

## Cumulative Out-Of-Sample Error (Post Intercept Shift)

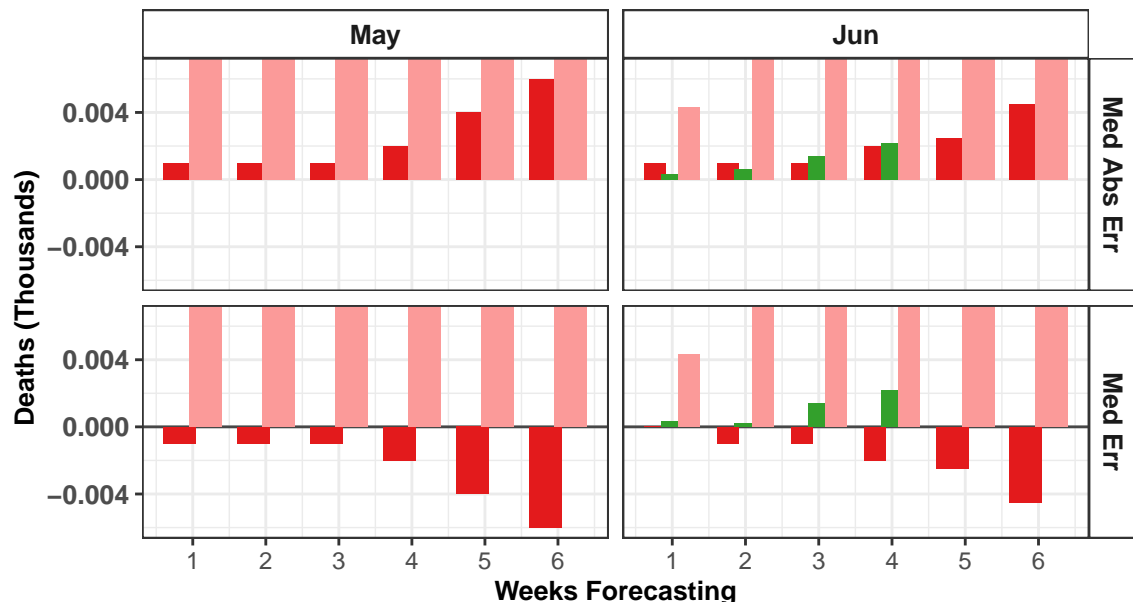

## All Model Versions

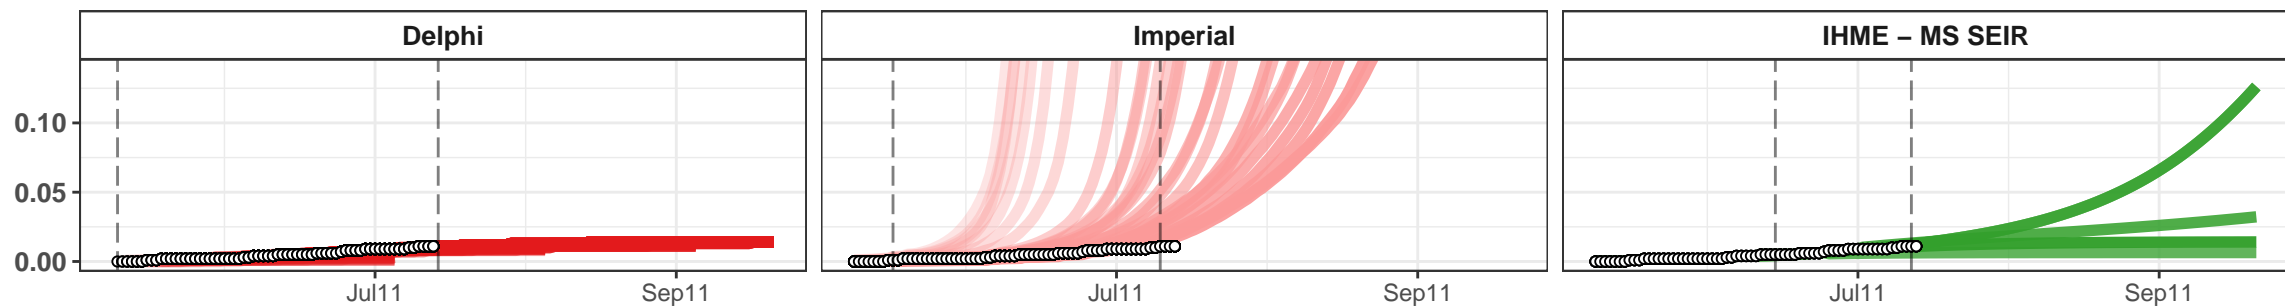

## All Cumulative Errors

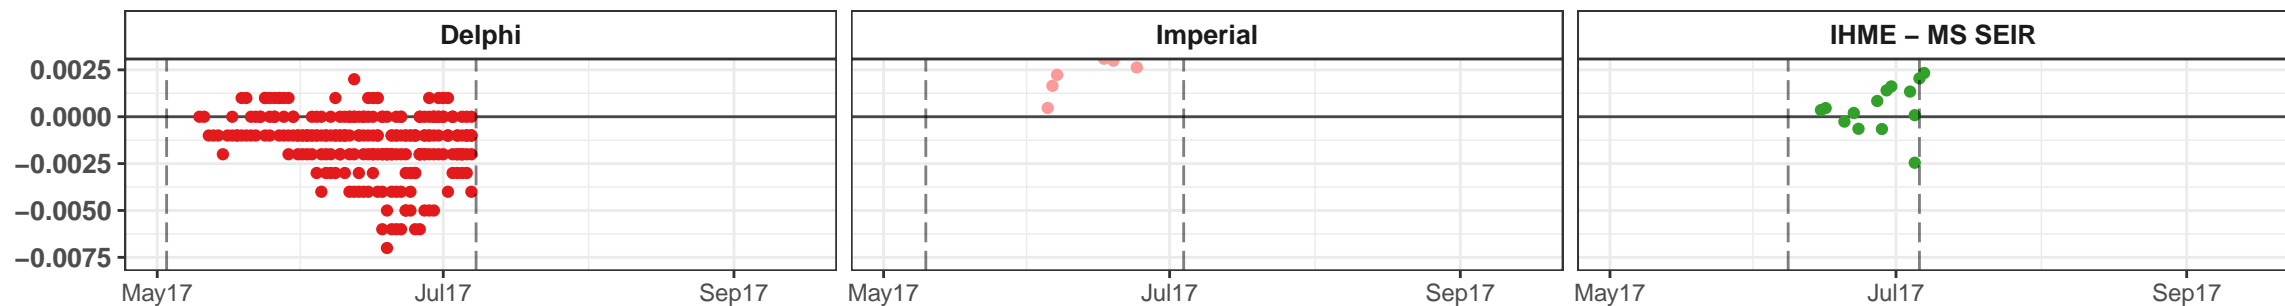

# Sri Lanka

## Current Forecast

Delphi Imperial IHME – MS SEIR

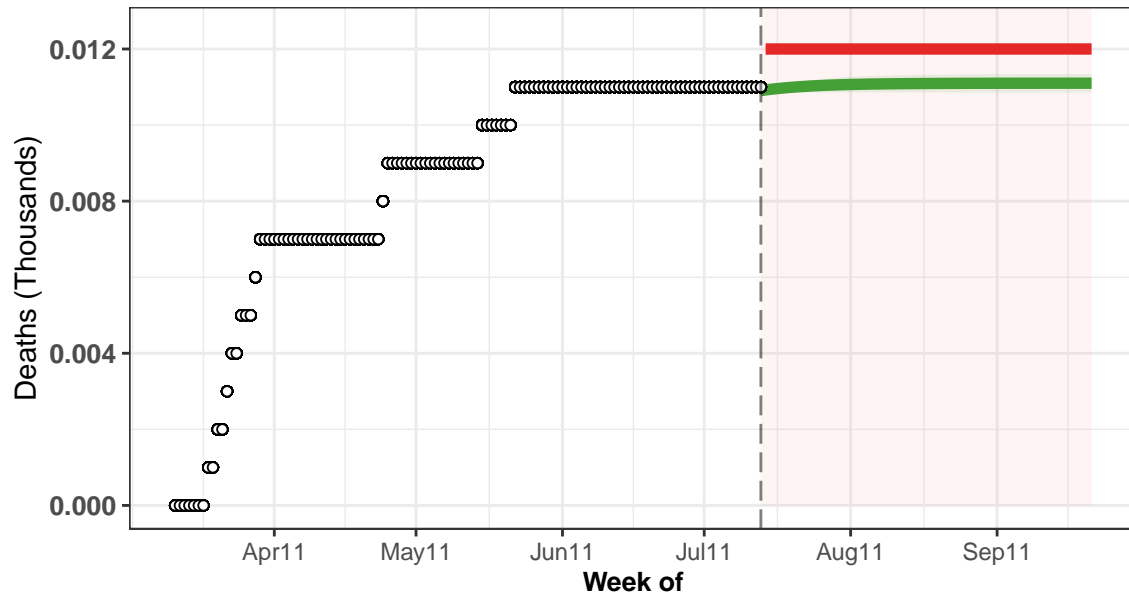

## Cumulative Out-Of-Sample Error (Post Intercept Shift)

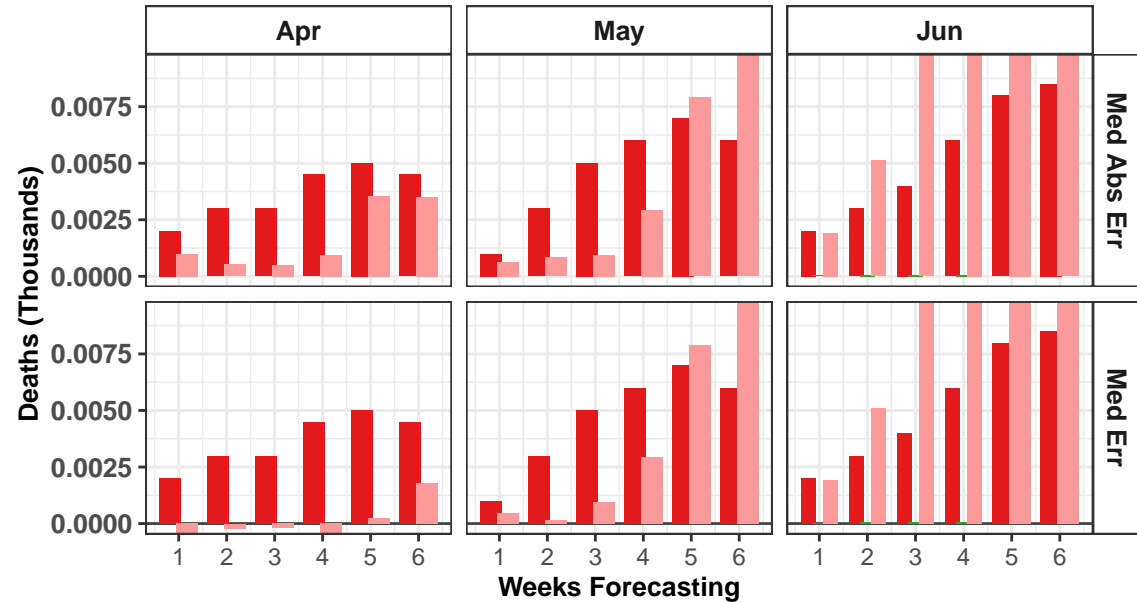

## All Model Versions

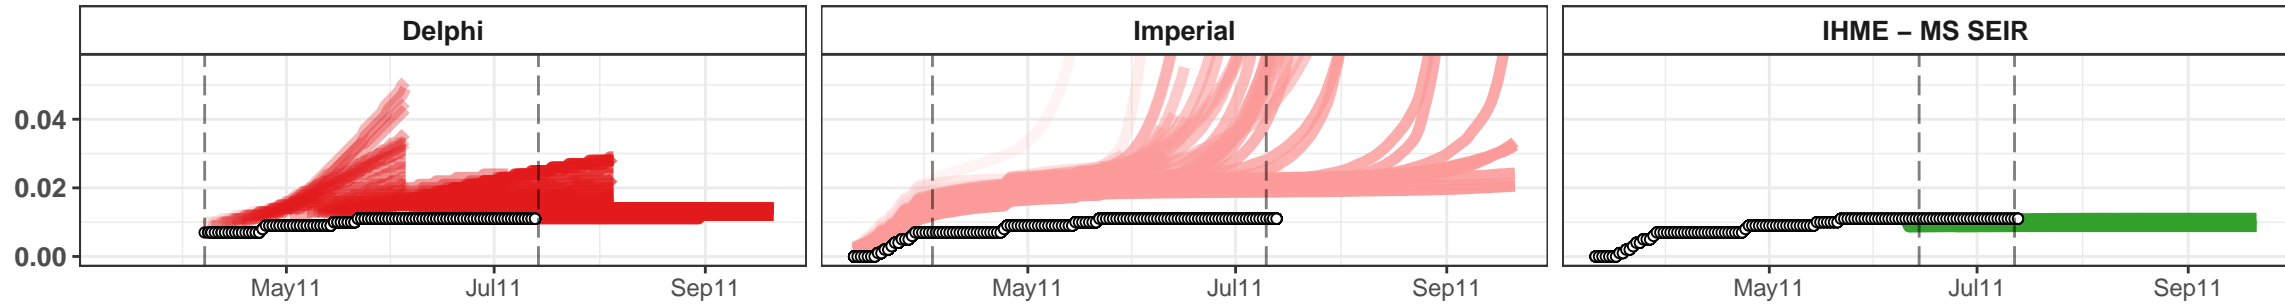

## All Cumulative Errors

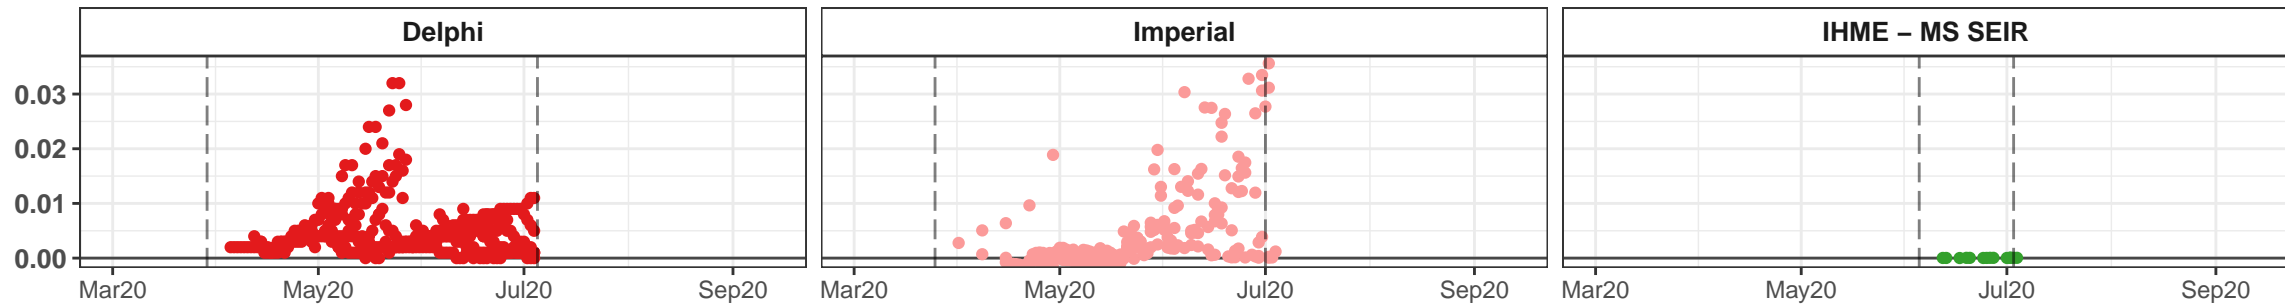

Supplement: Supplementary file [file 2020.07.13.20151233-4.pdf]
