# Supplementary material for: Predictive performance of international COVID-19 mortality forecasting models
Source: bioRxiv or medRxiv preprint supplement (doi:10.1101/2020.07.13.20151233), 2020-11-19

# United States

## Current Forecast

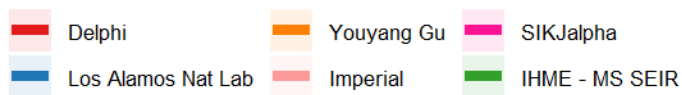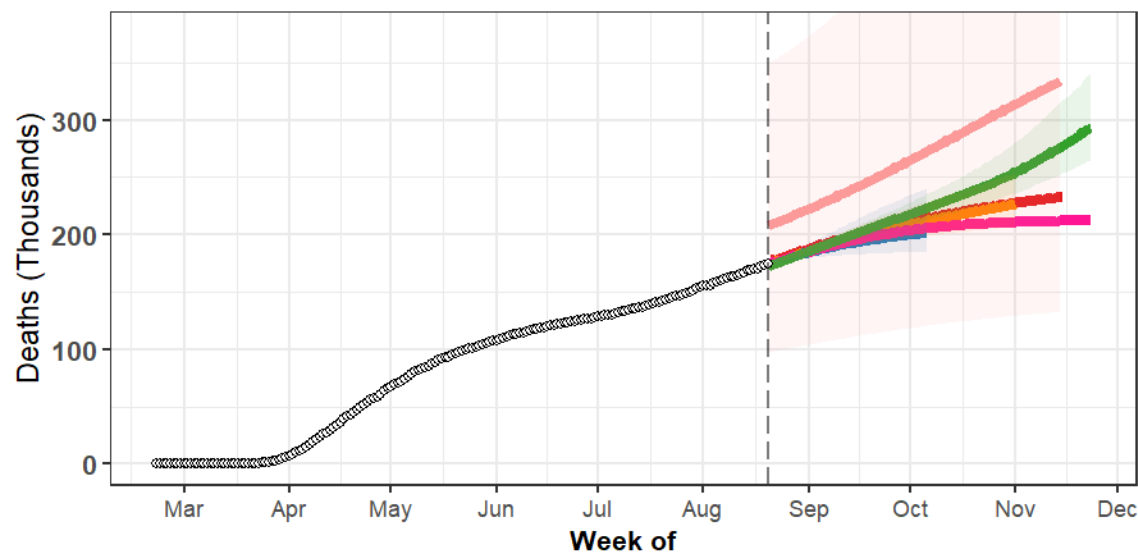

## Cumulative Out-Of-Sample Error (Post Intercept Shift)

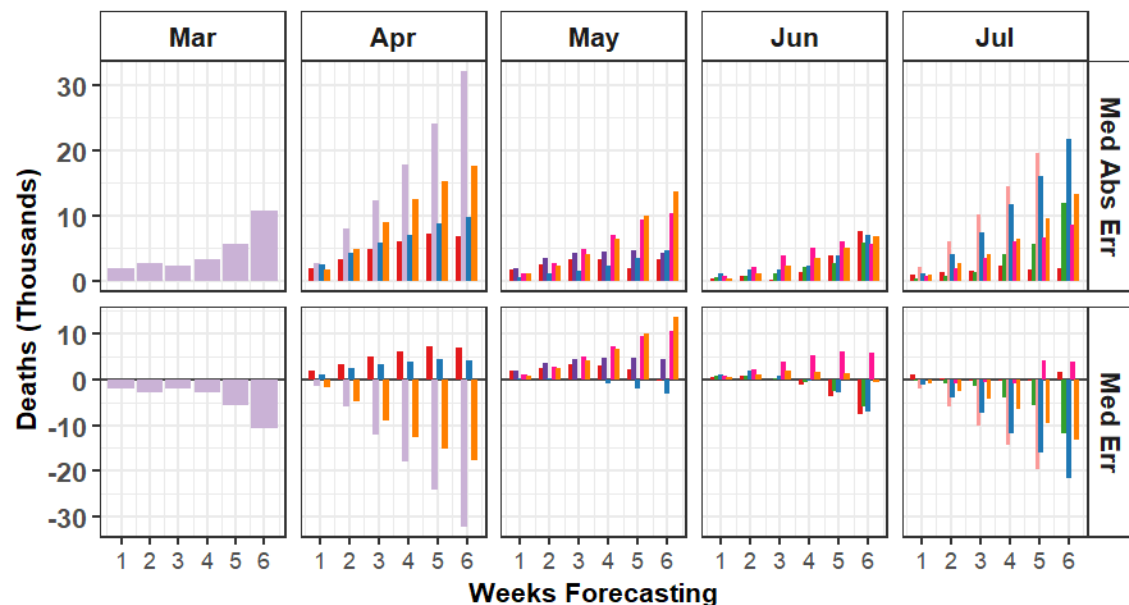

## All Model Versions

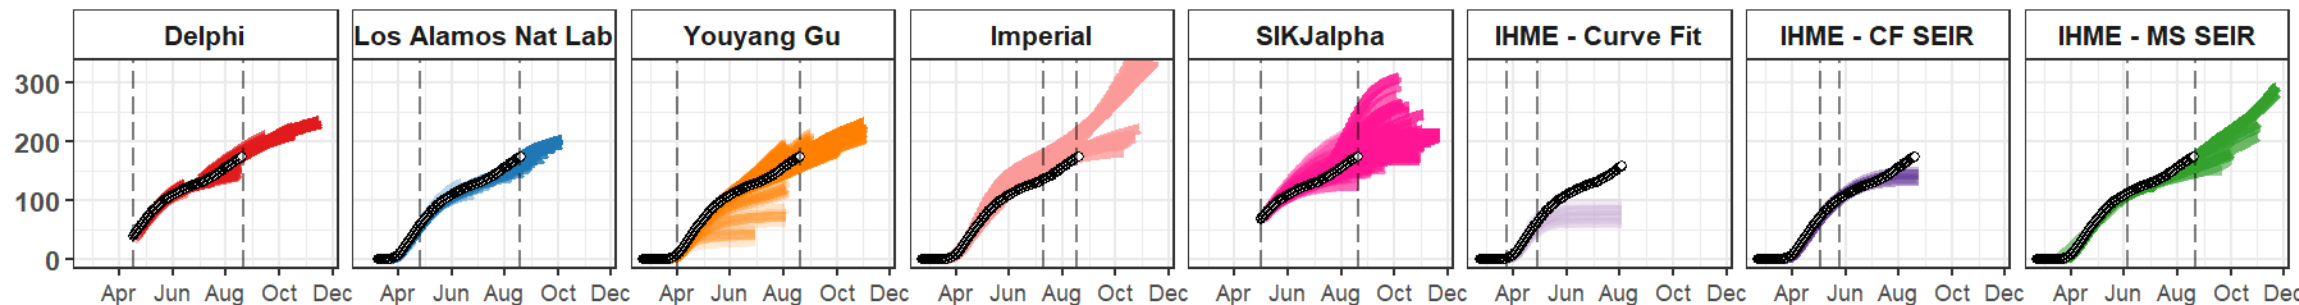

## All Cumulative Errors

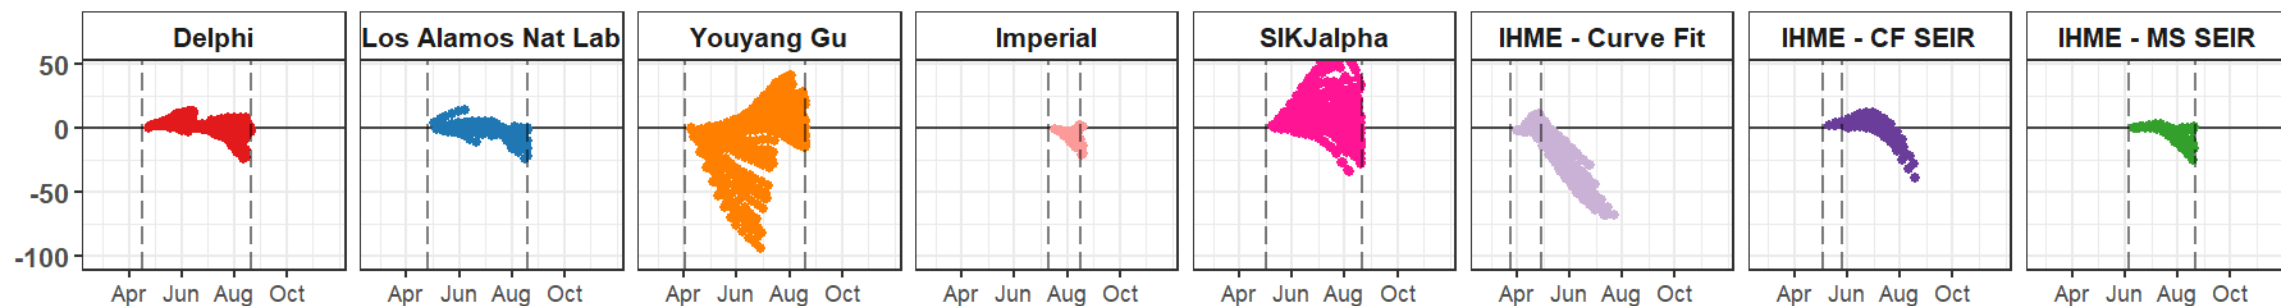

# Brazil

## Current Forecast

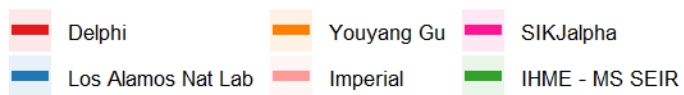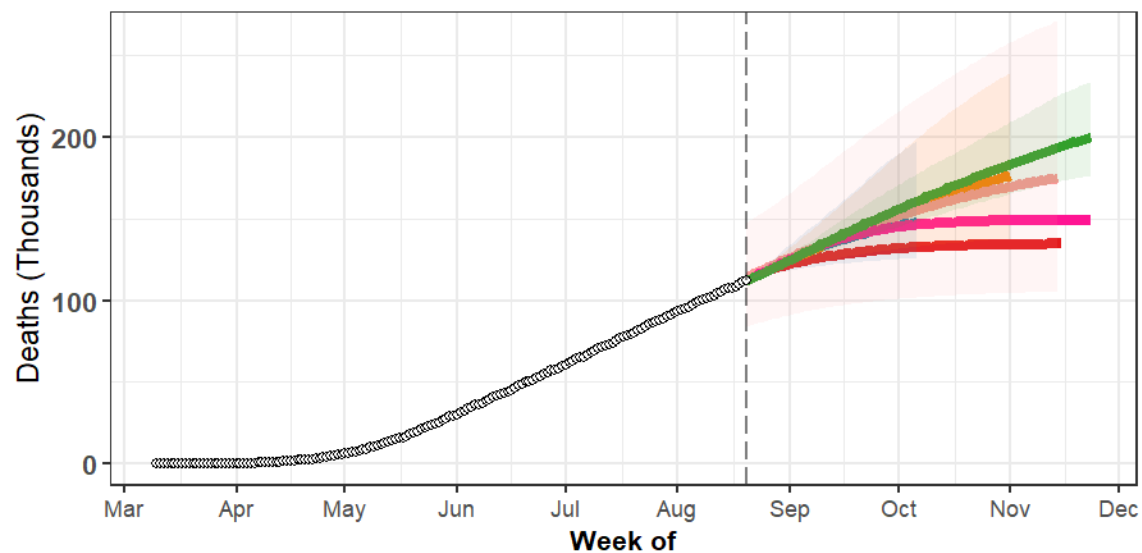

## Cumulative Out-Of-Sample Error (Post Intercept Shift)

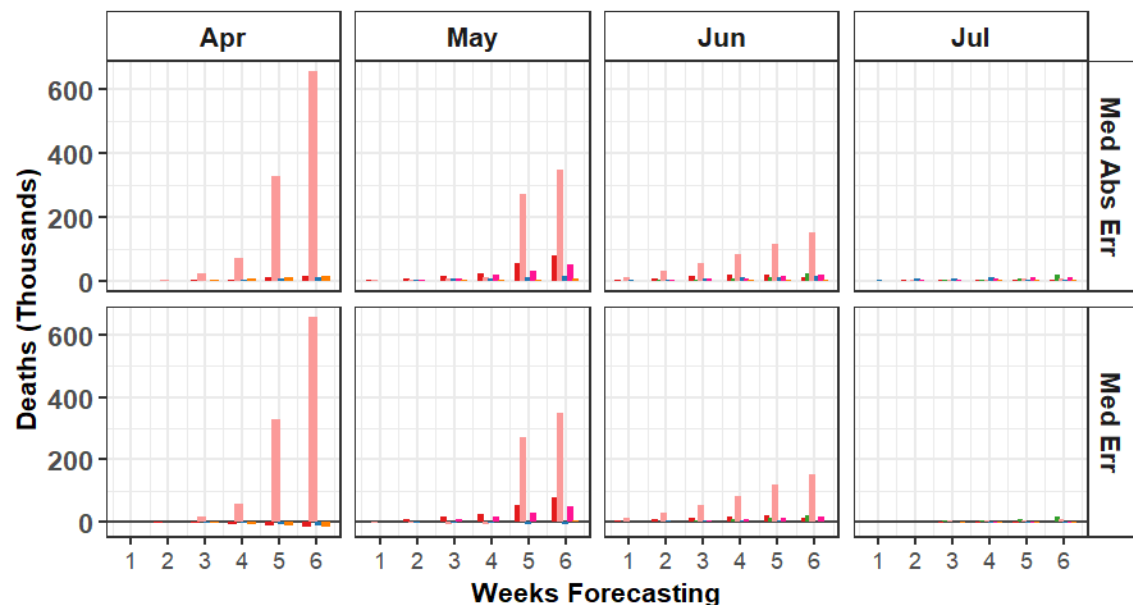

## All Model Versions

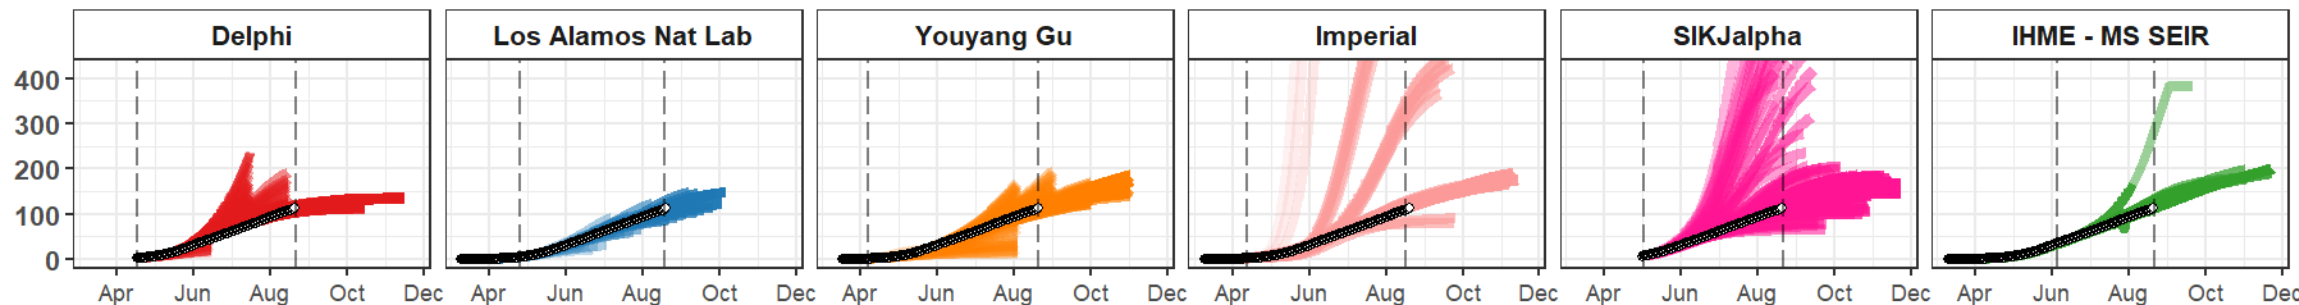

## All Cumulative Errors

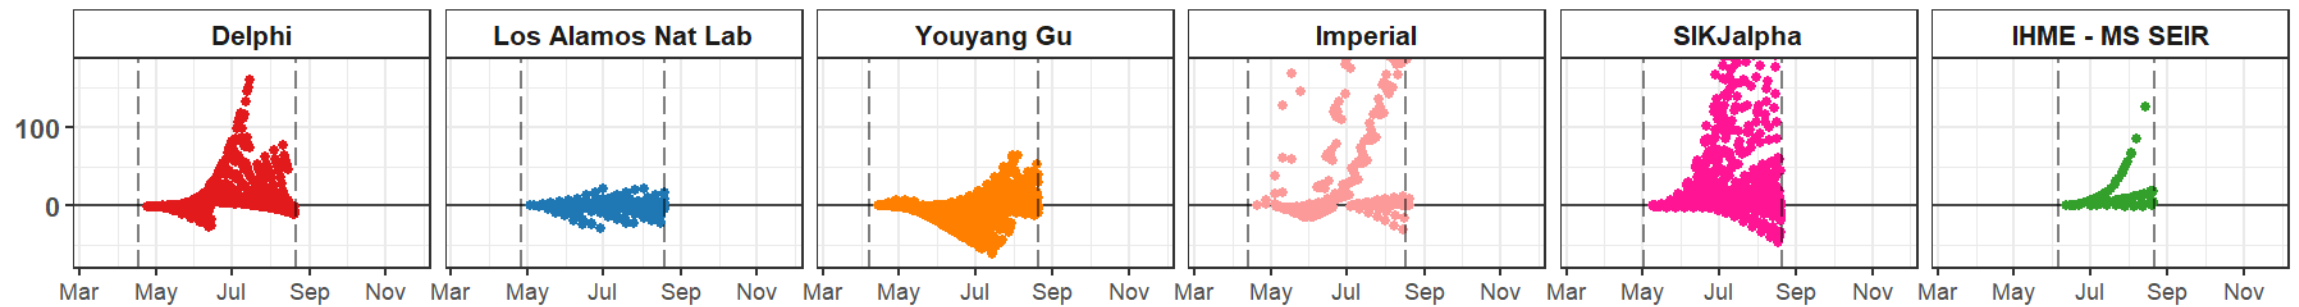

# Mexico

## Current Forecast

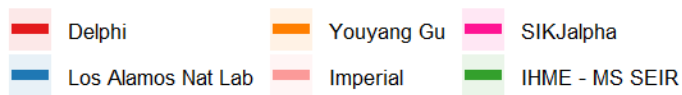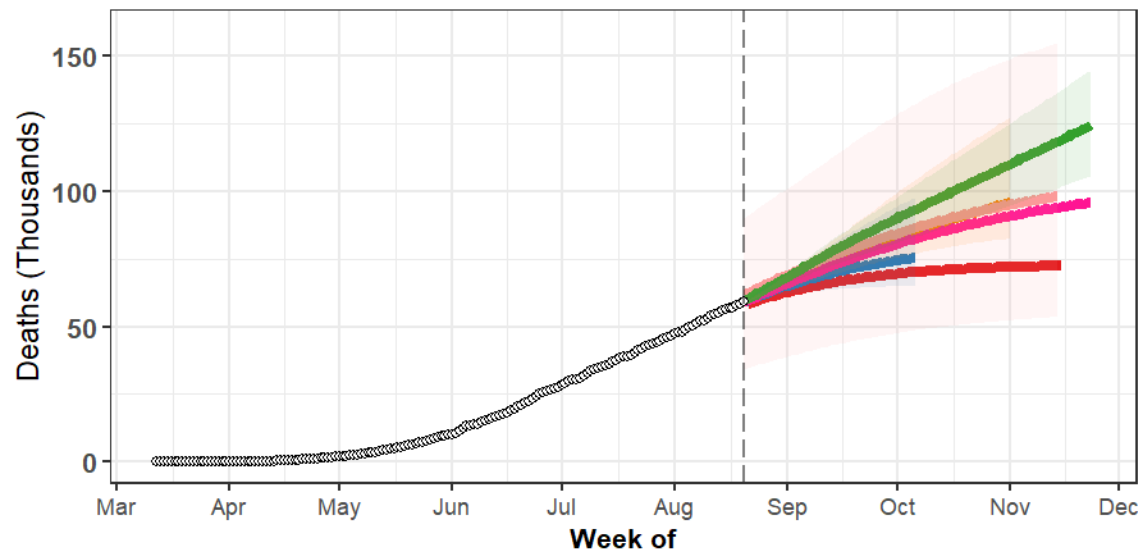

## Cumulative Out-Of-Sample Error (Post Intercept Shift)

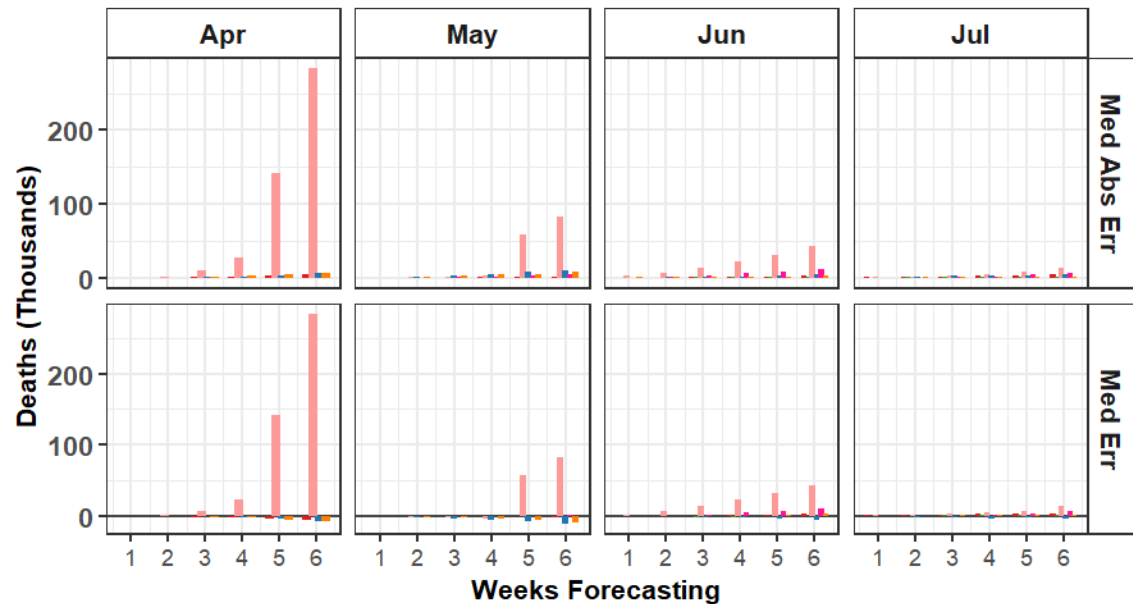

## All Model Versions

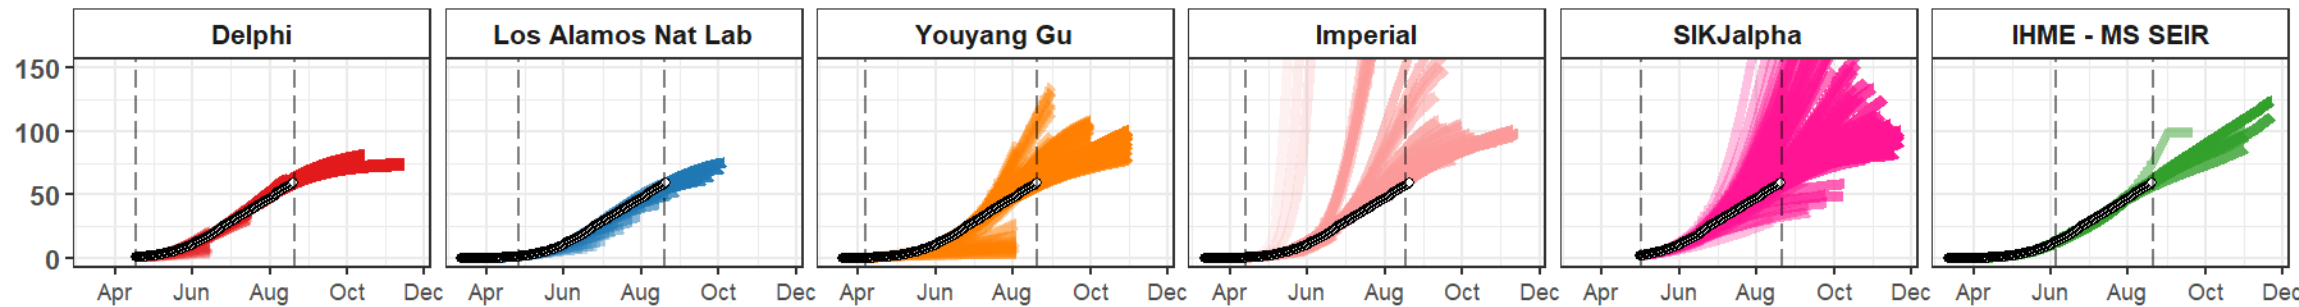

## All Cumulative Errors

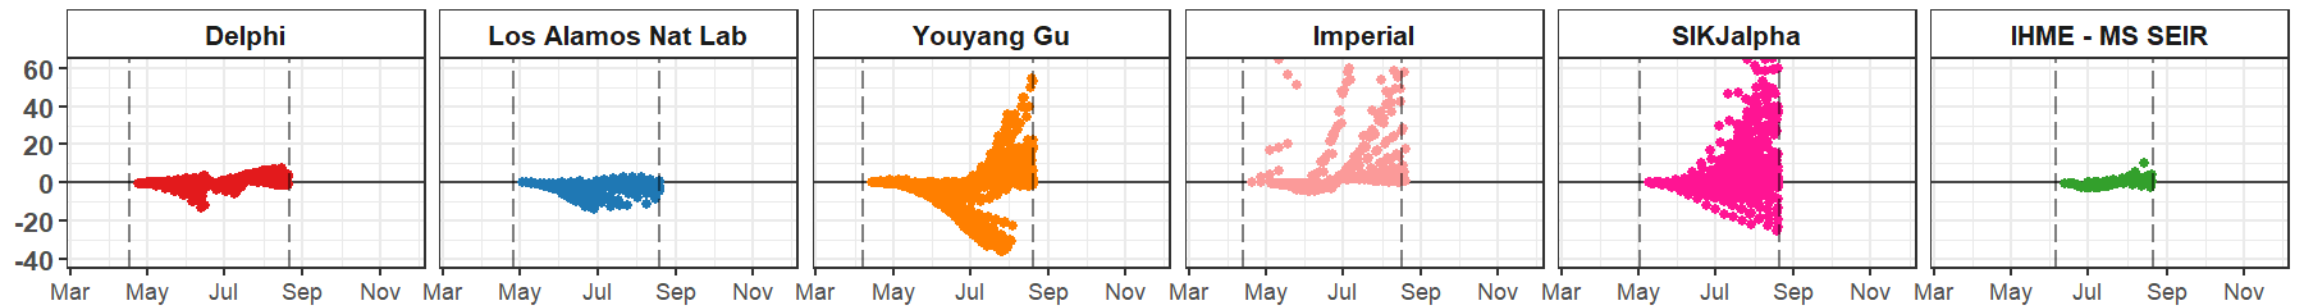

# India

## Current Forecast

Delphi Los Alamos Nat Lab Youyang Gu Imperial SIKJalpha

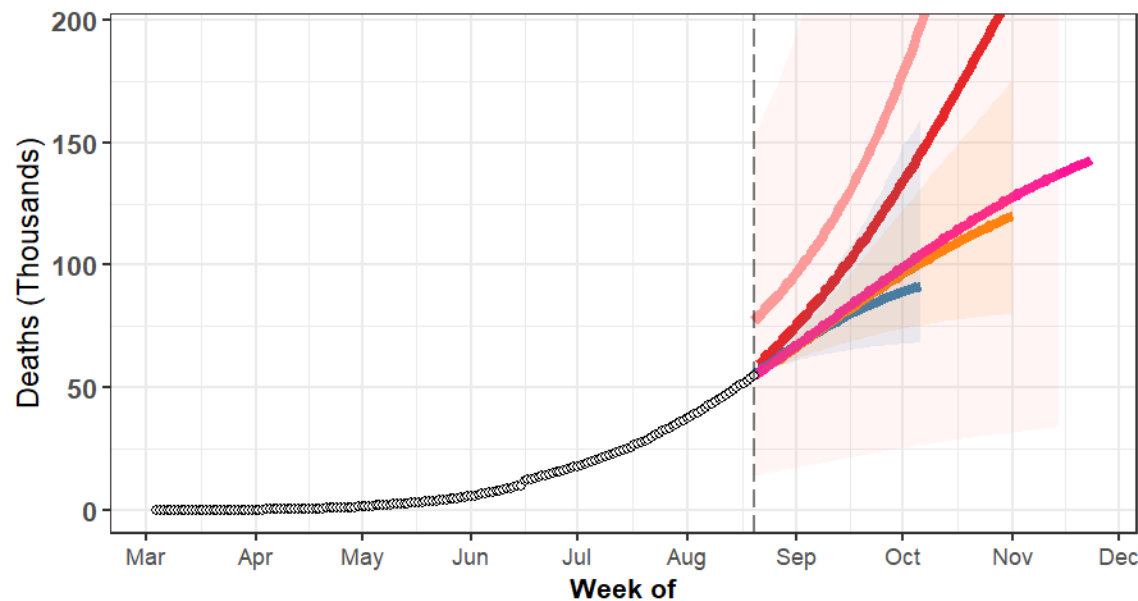

## Cumulative Out-Of-Sample Error (Post Intercept Shift)

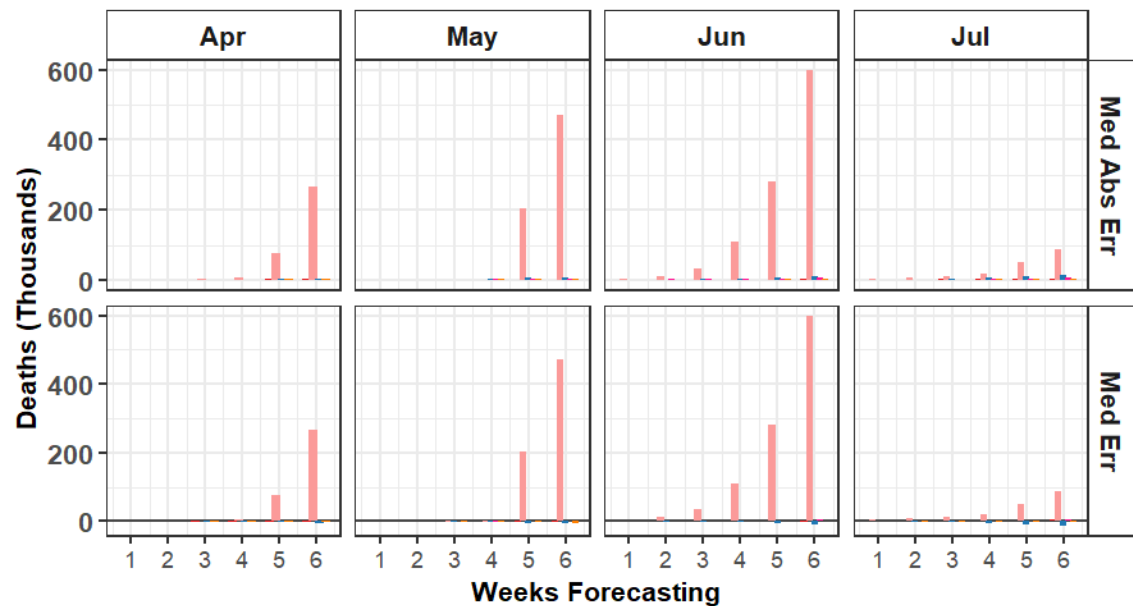

## All Model Versions

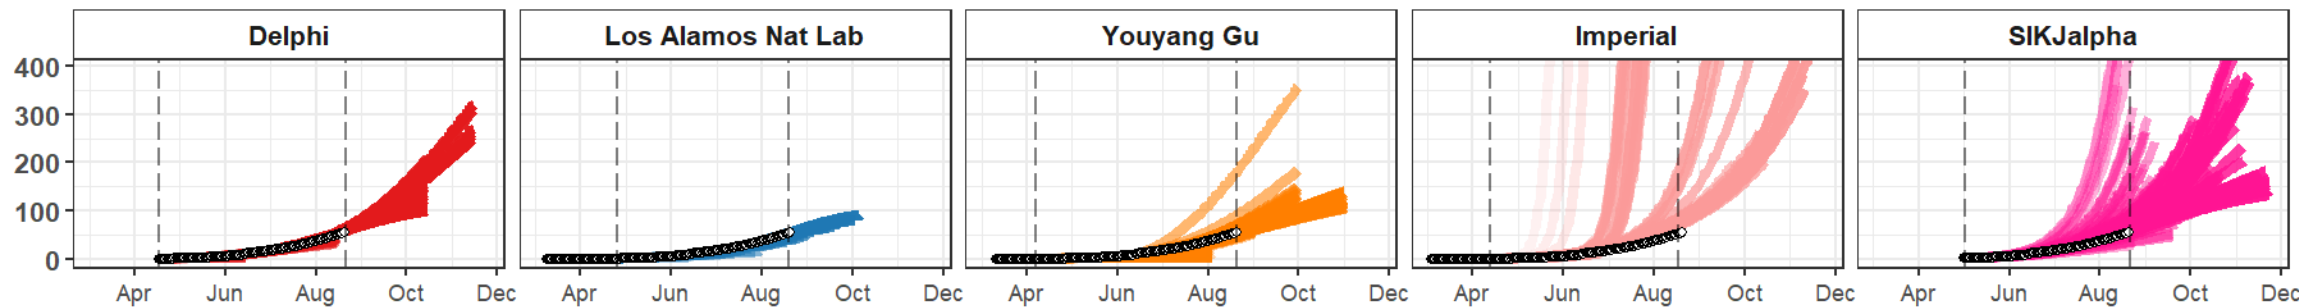

## All Cumulative Errors

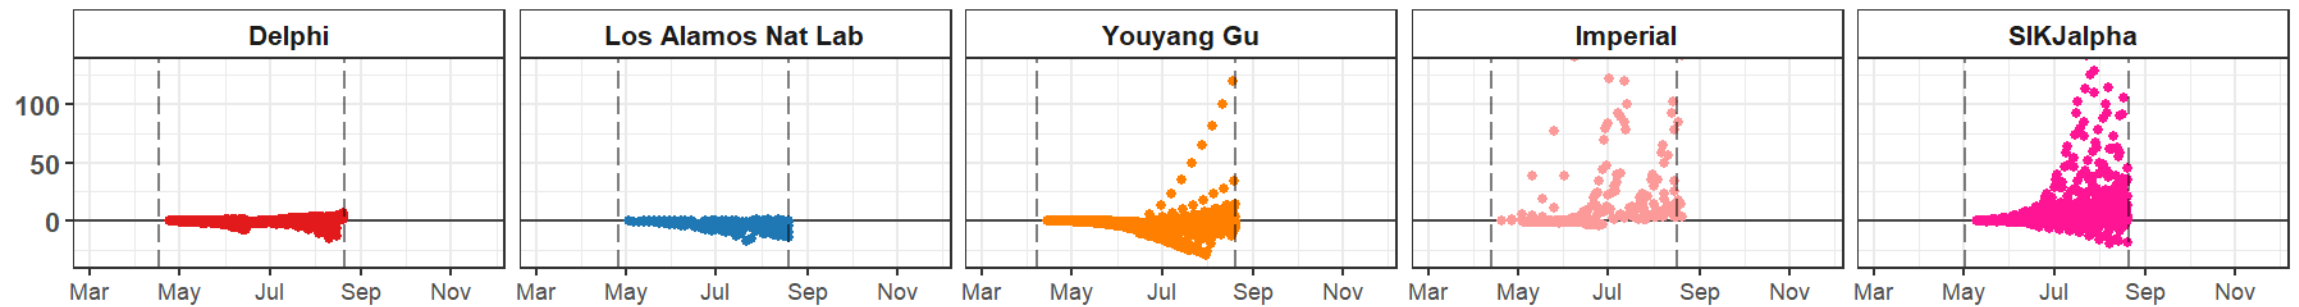

# United Kingdom

## Current Forecast

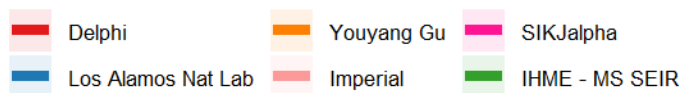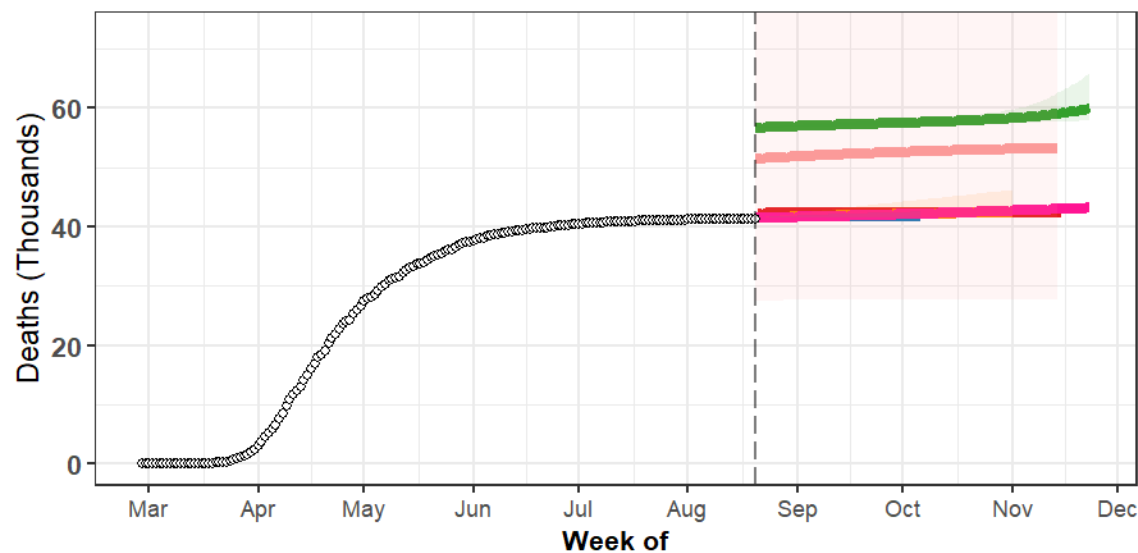

## Cumulative Out-Of-Sample Error (Post Intercept Shift)

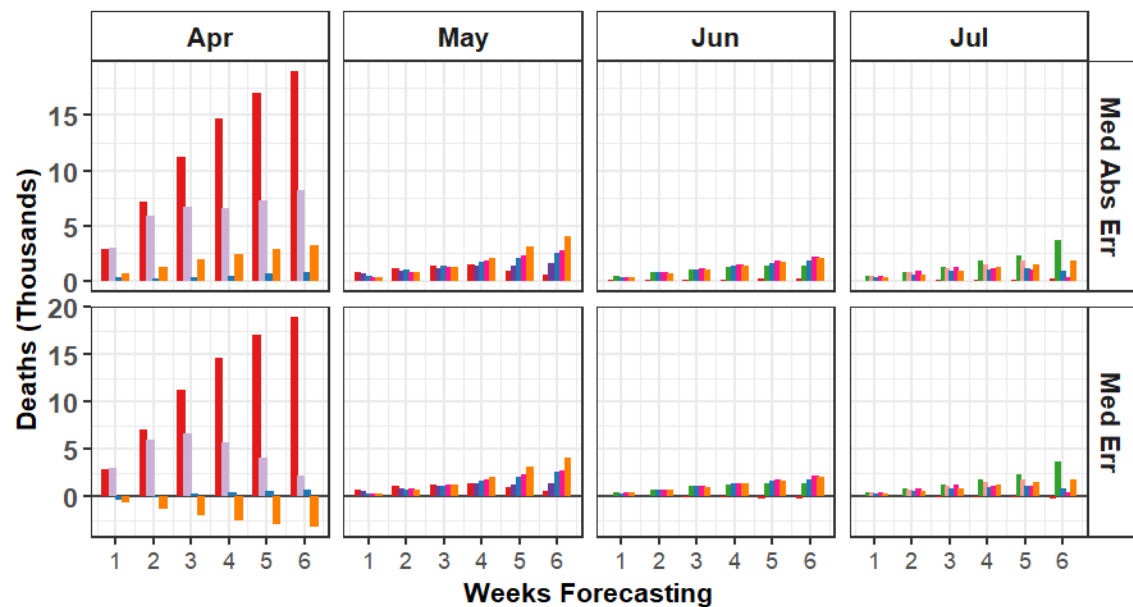

## All Model Versions

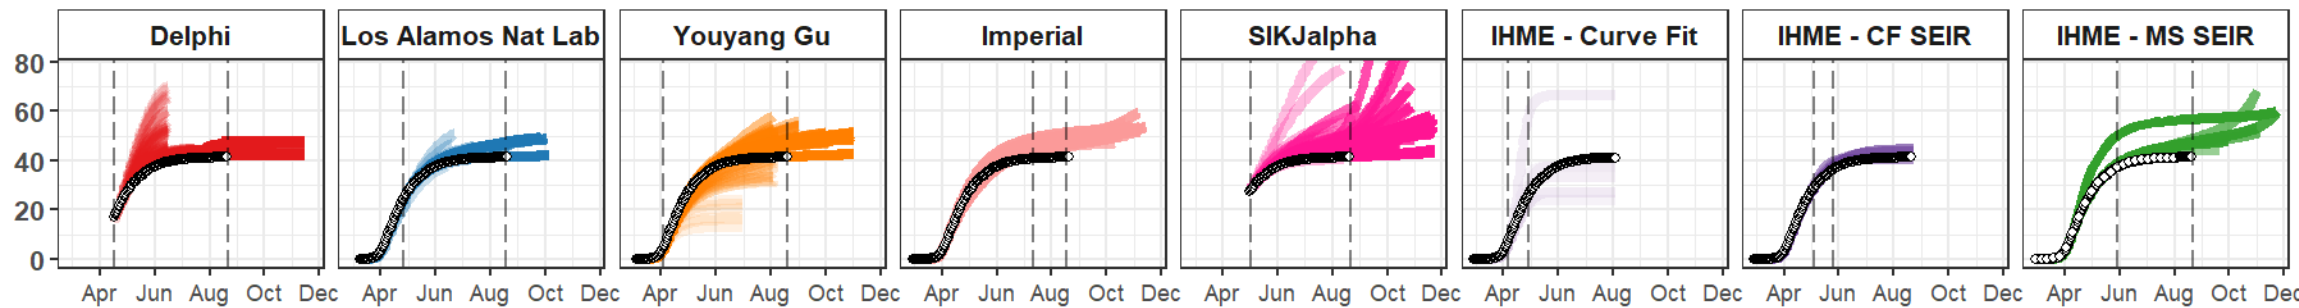

## All Cumulative Errors

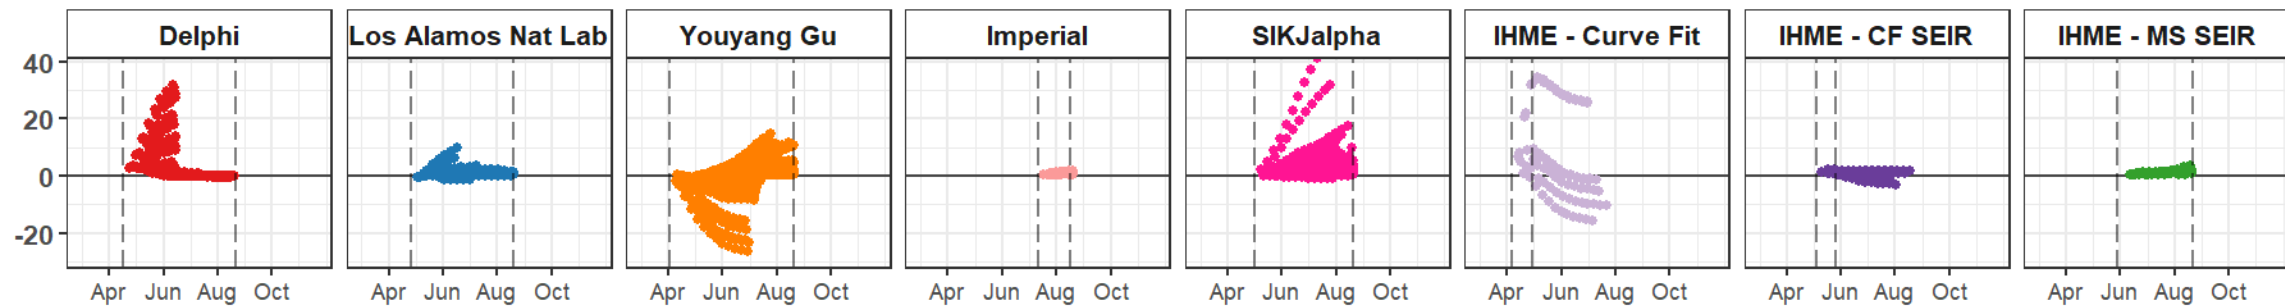

# Italy

## Current Forecast

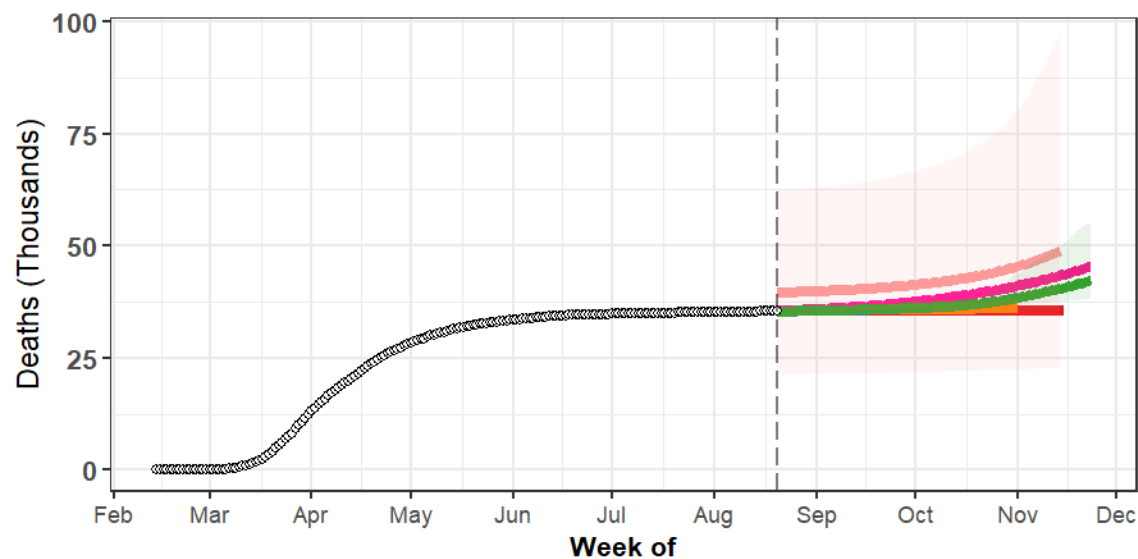

## Cumulative Out-Of-Sample Error (Post Intercept Shift)

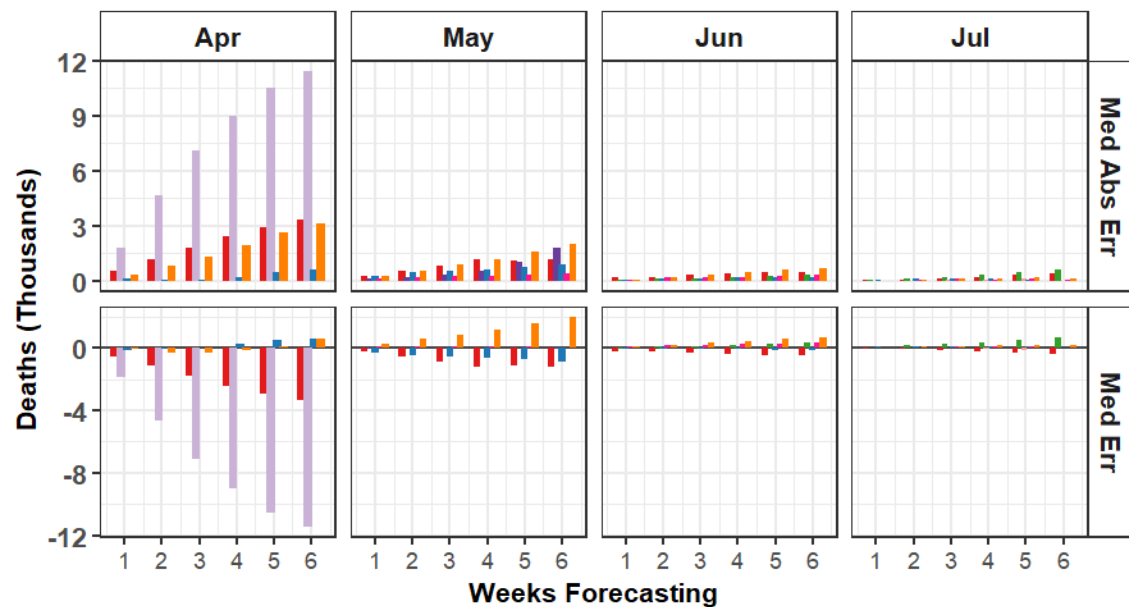

## All Model Versions

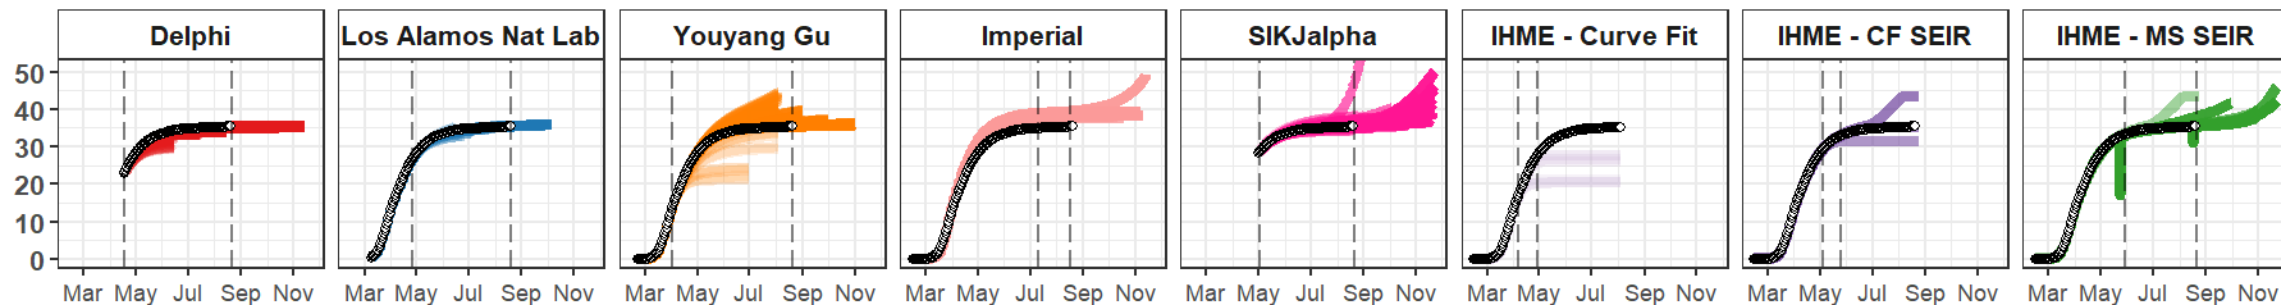

## All Cumulative Errors

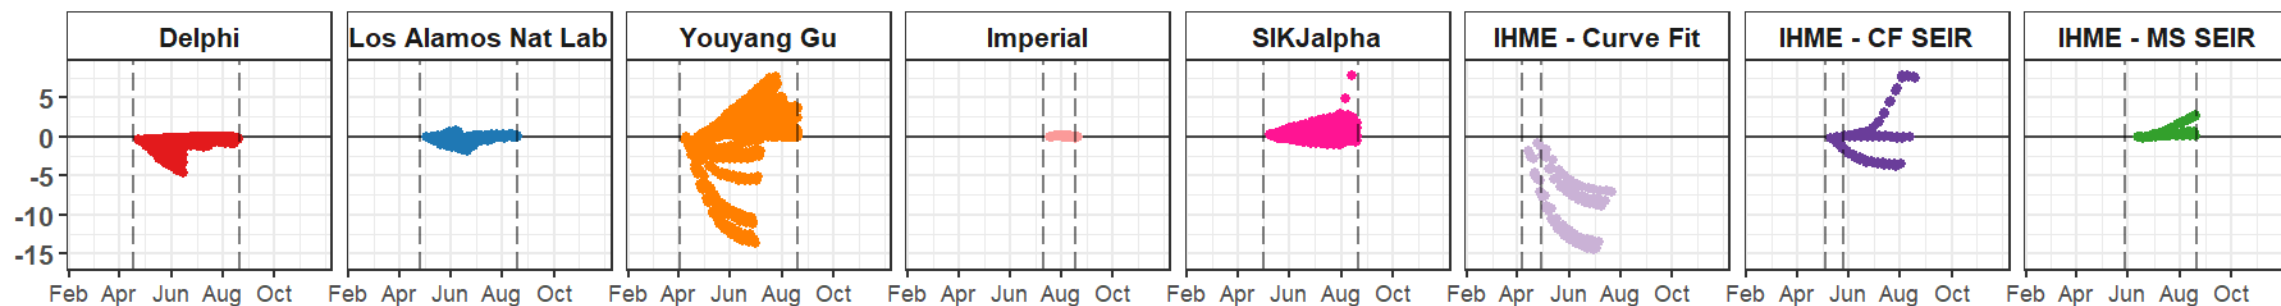

# New York

## Current Forecast

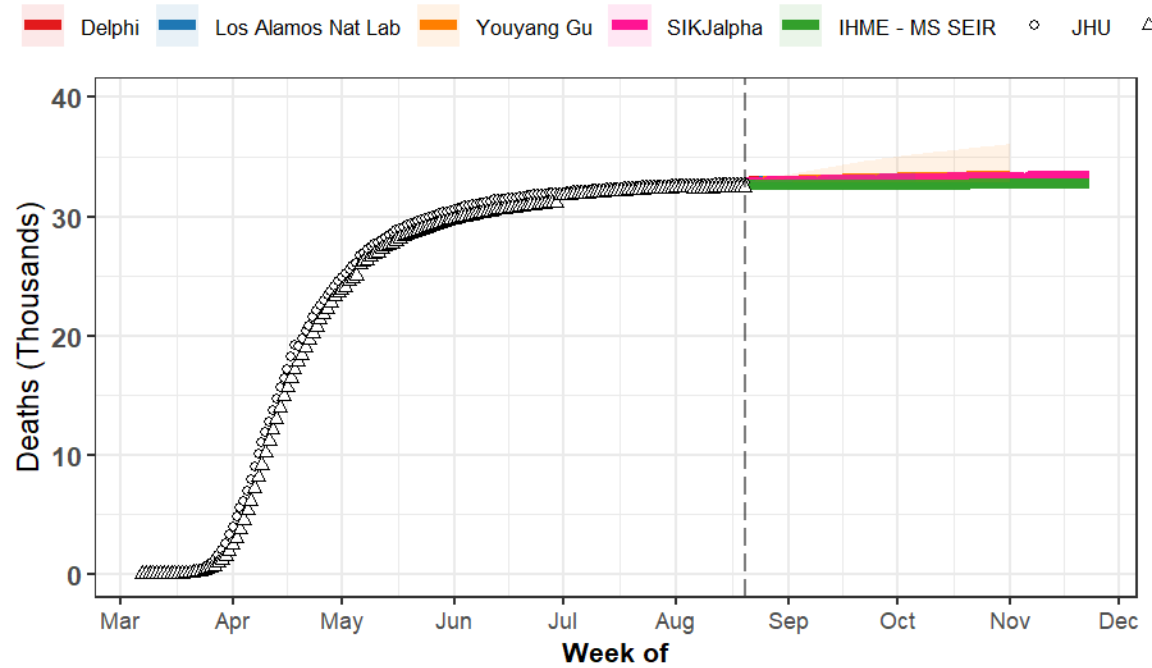

## Cumulative Out-Of-Sample Error (Post Intercept Shift)

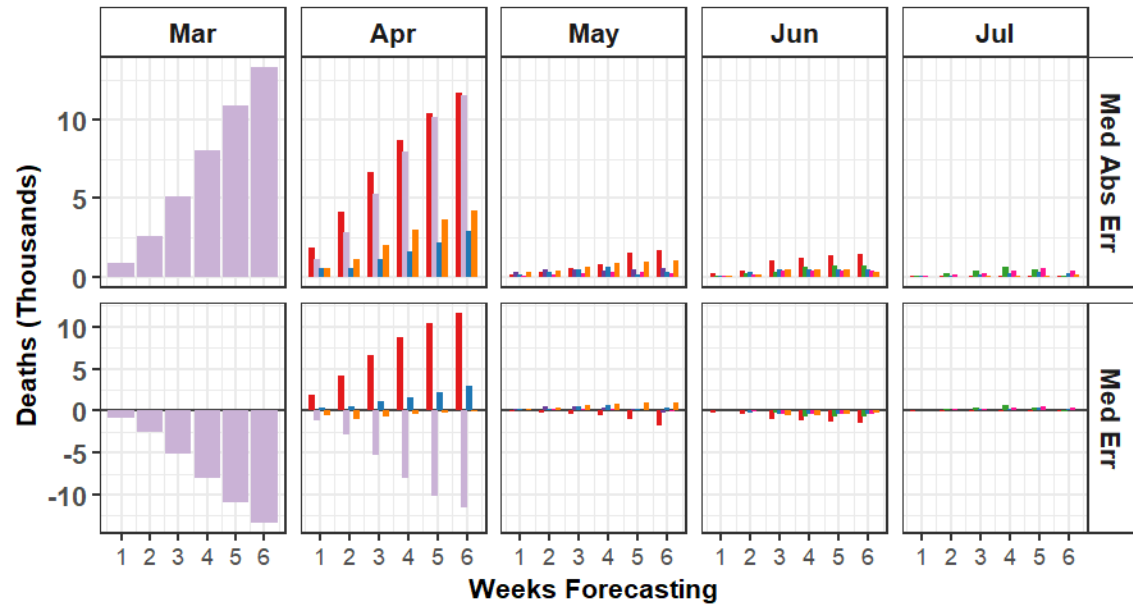

## All Model Versions

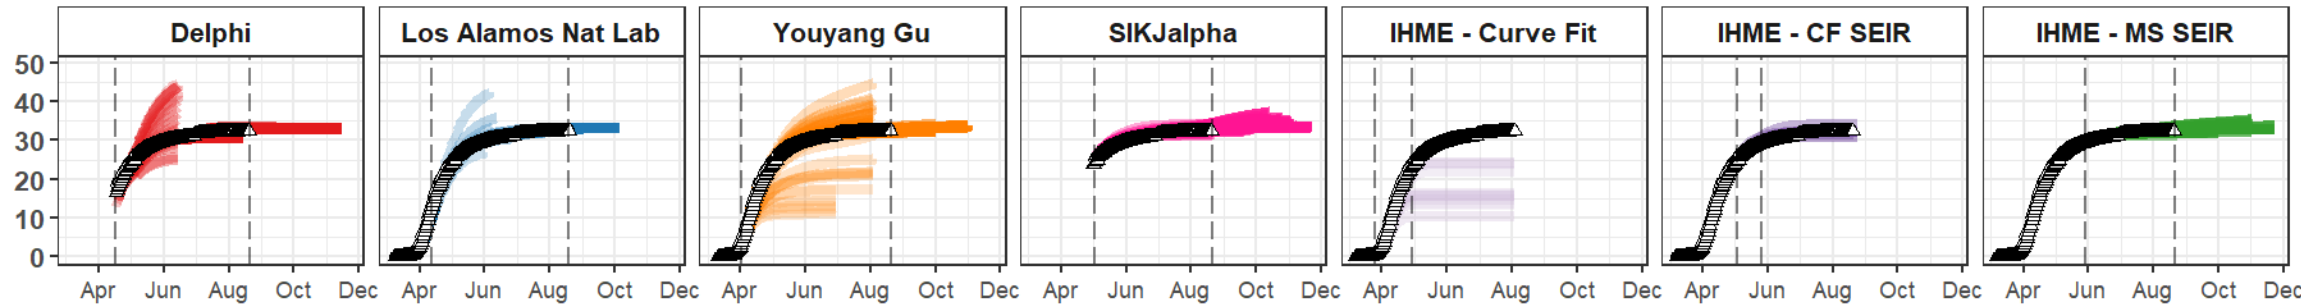

## All Cumulative Errors

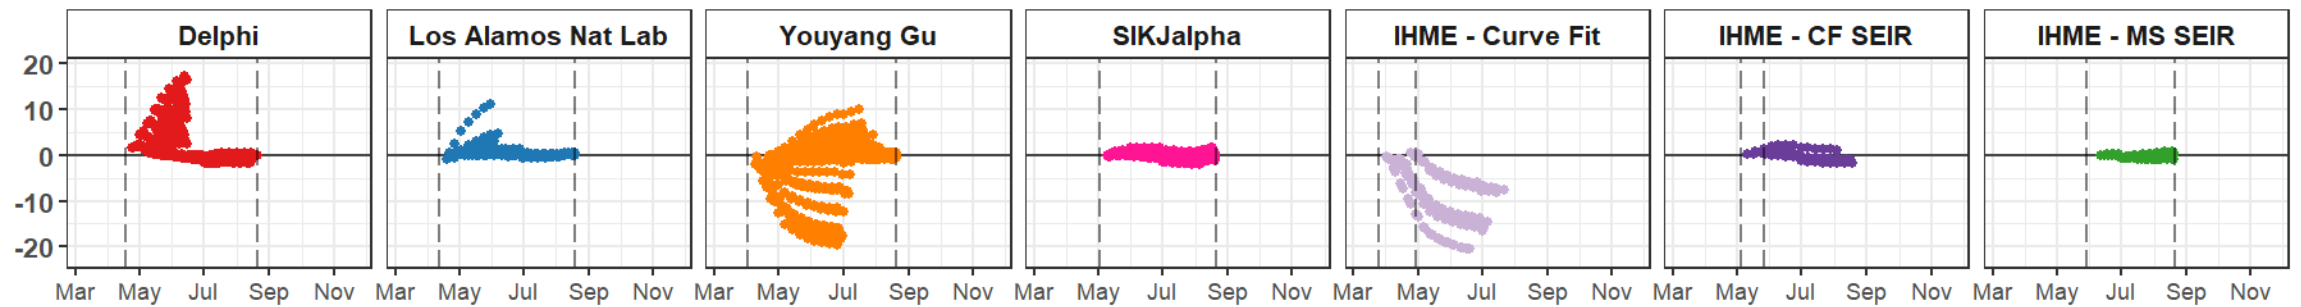

# France

## Current Forecast

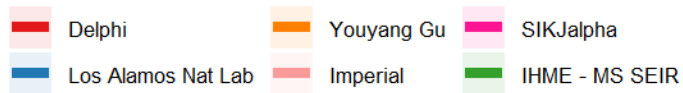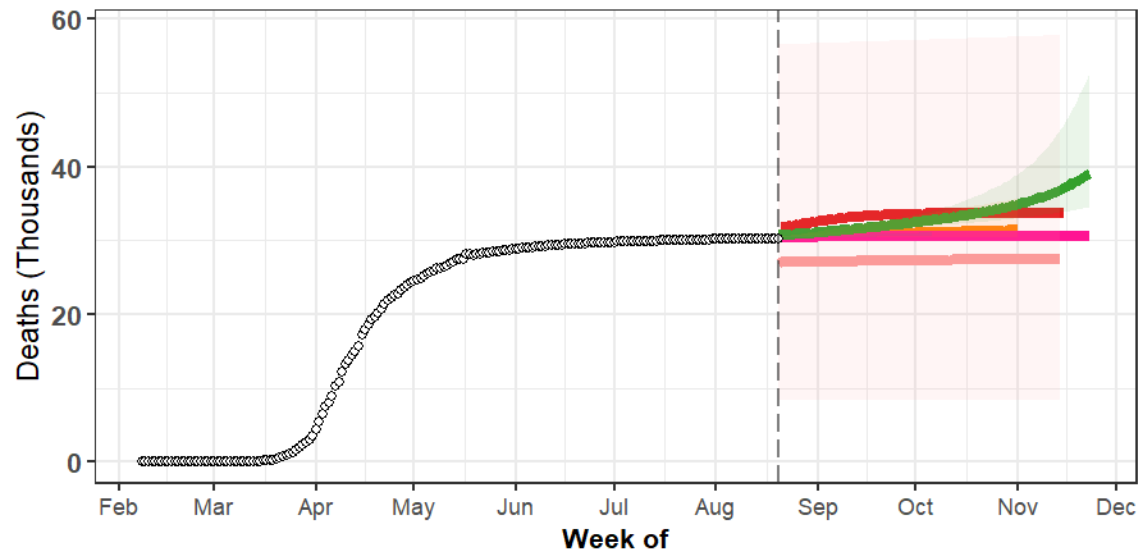

## Cumulative Out-Of-Sample Error (Post Intercept Shift)

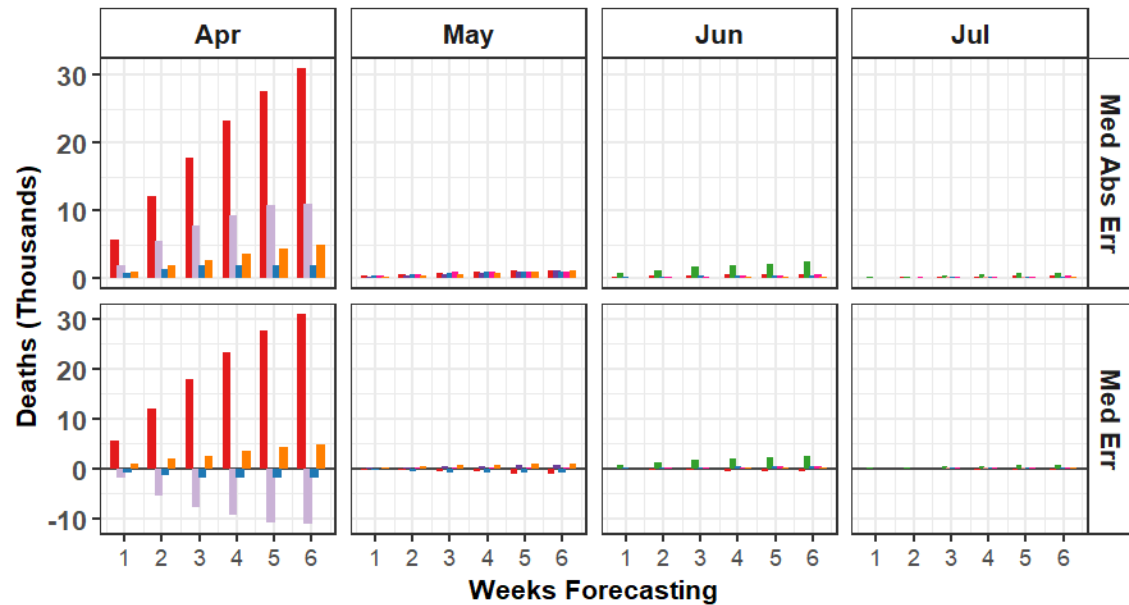

## All Model Versions

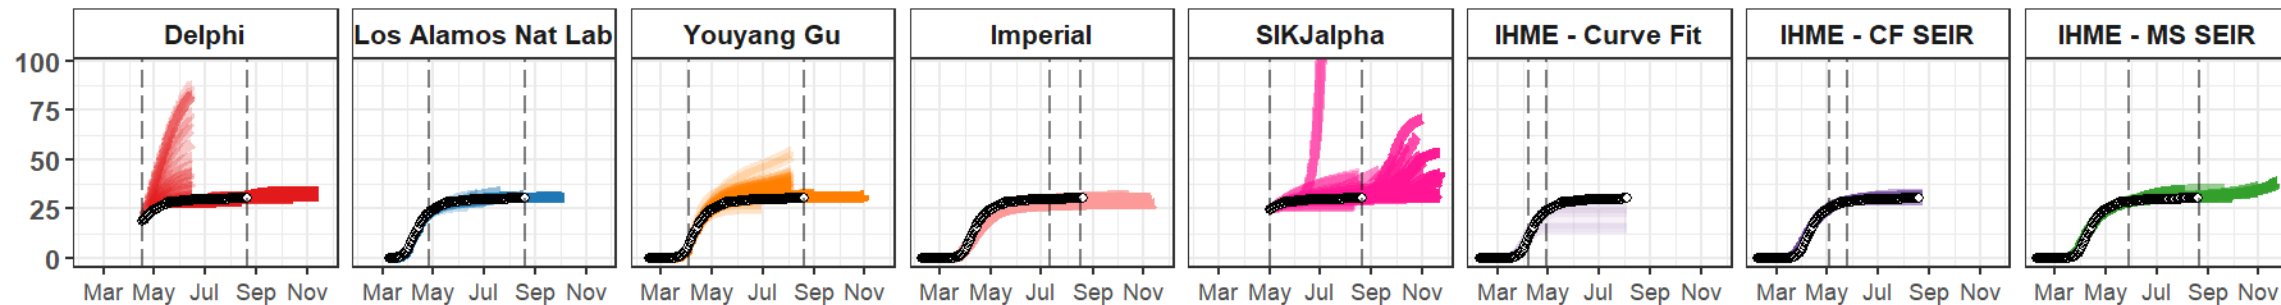

## All Cumulative Errors

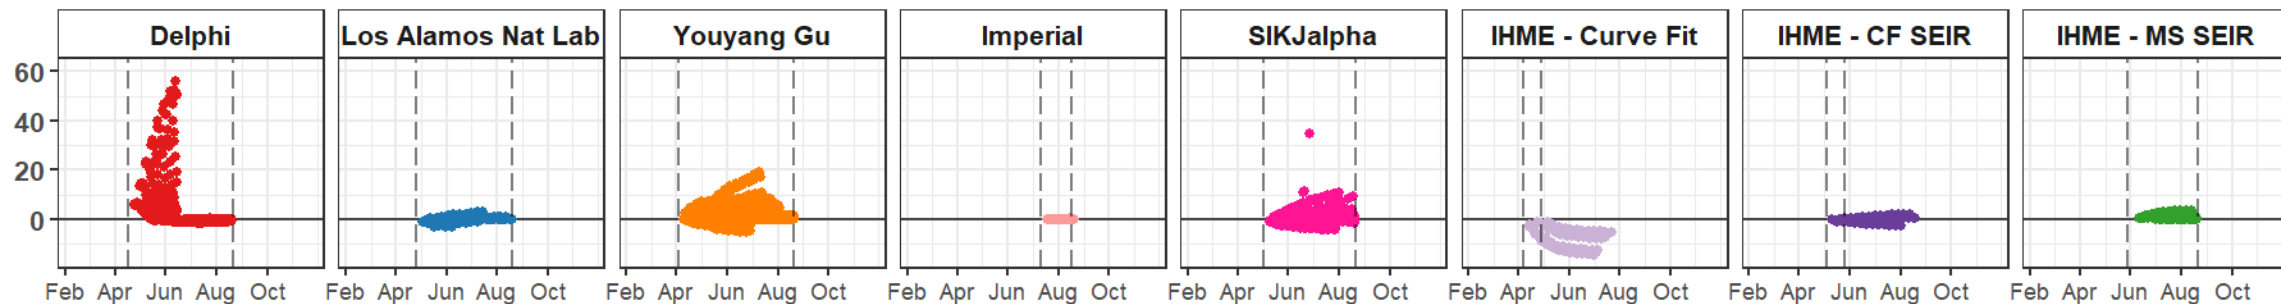



# Spain

## Current Forecast

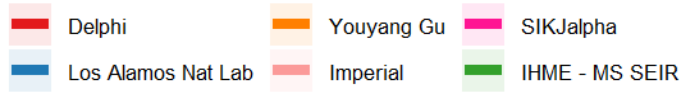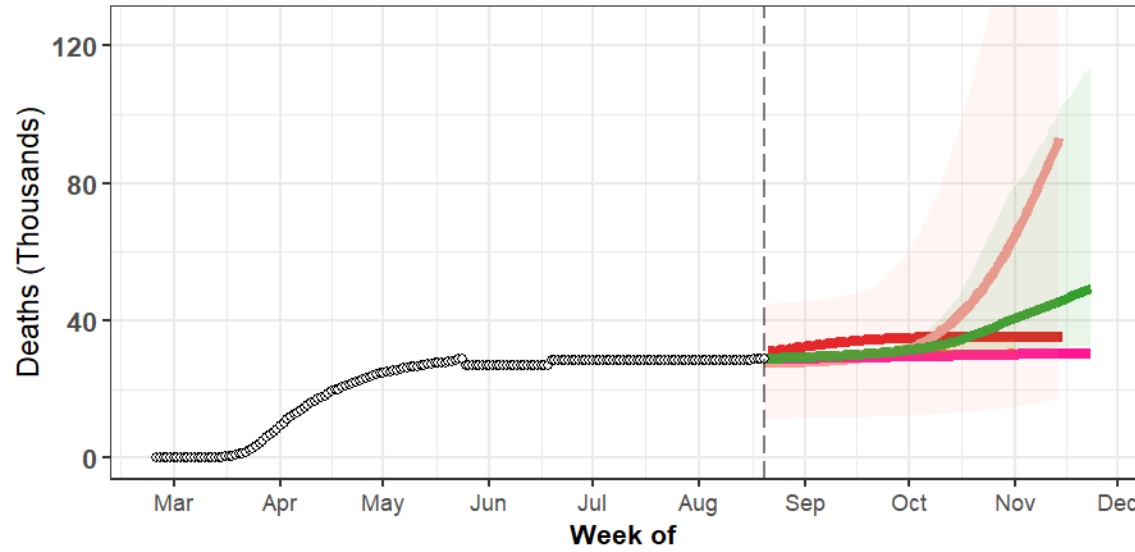

## Cumulative Out-Of-Sample Error (Post Intercept Shift)

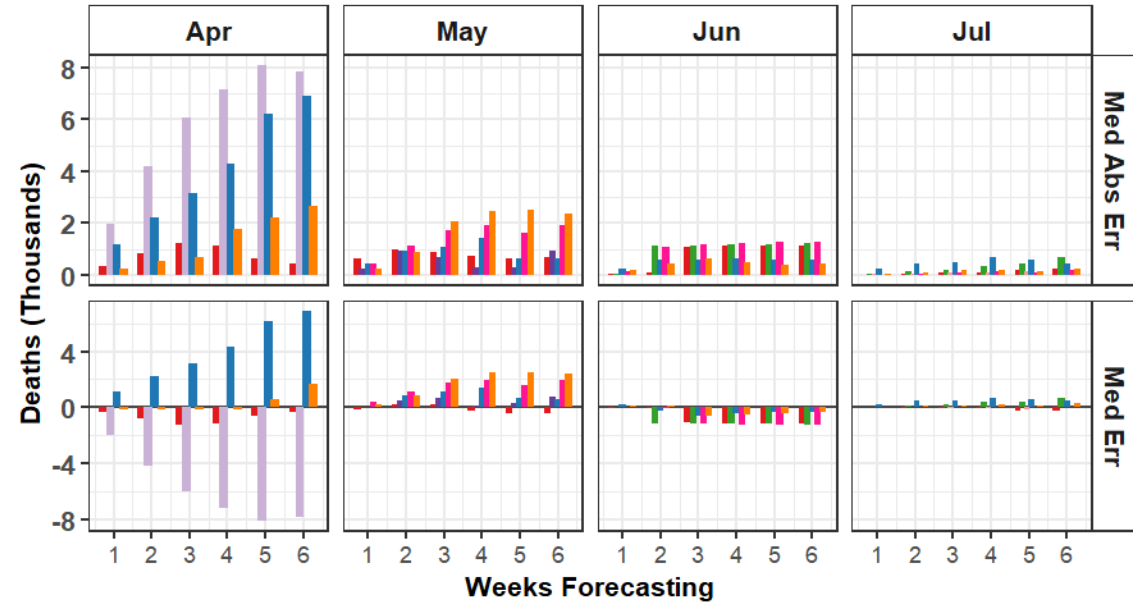

## All Model Versions

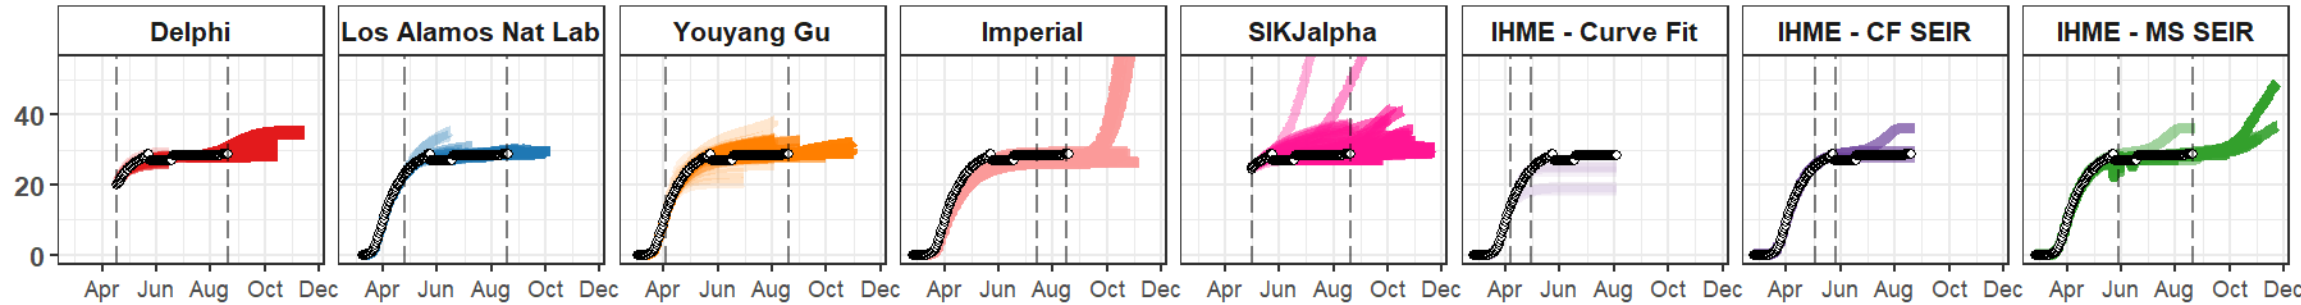

## All Cumulative Errors

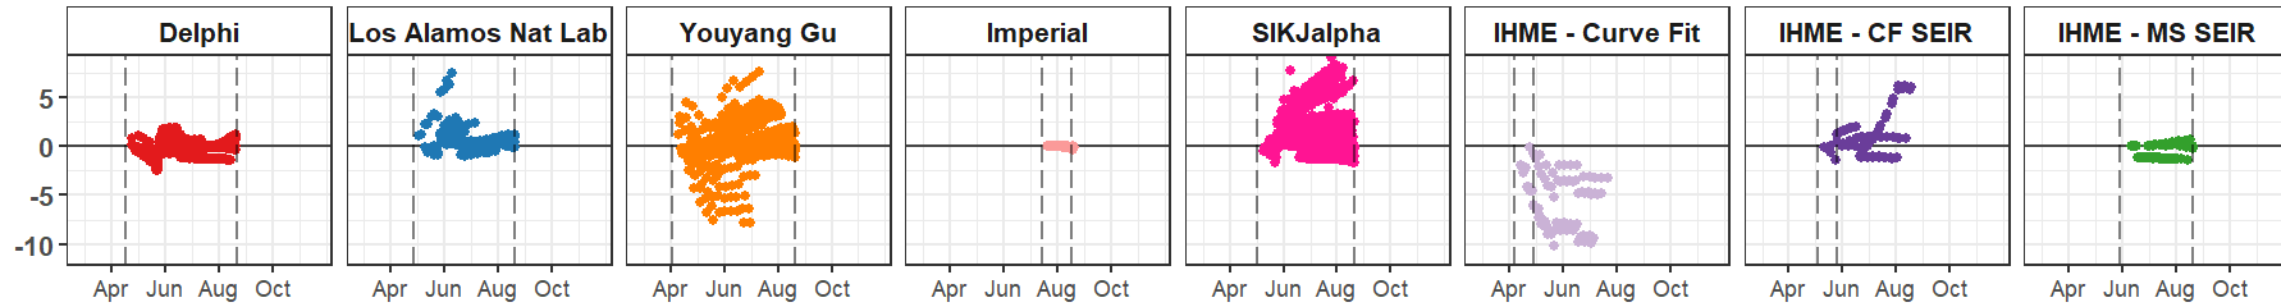

# Iran

## Current Forecast

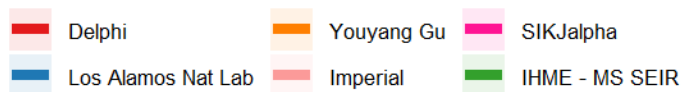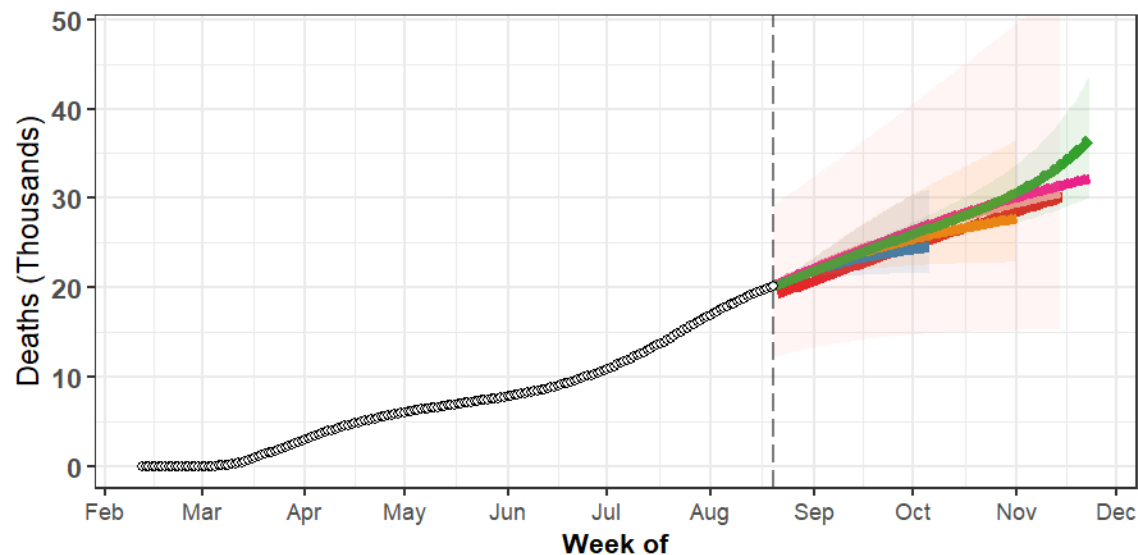

## Cumulative Out-Of-Sample Error (Post Intercept Shift)

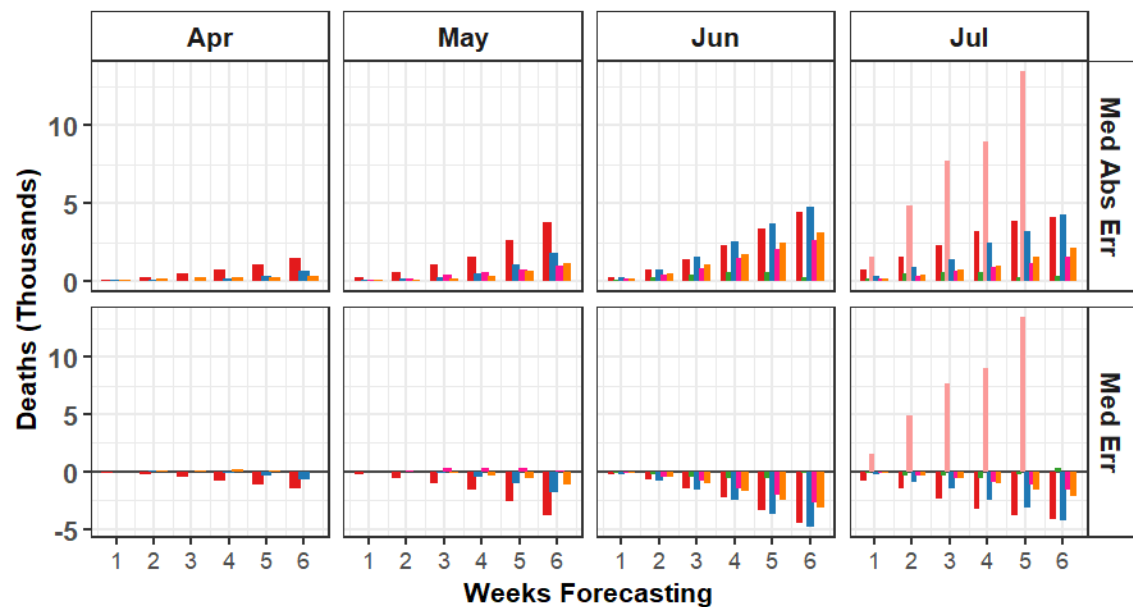

## All Model Versions

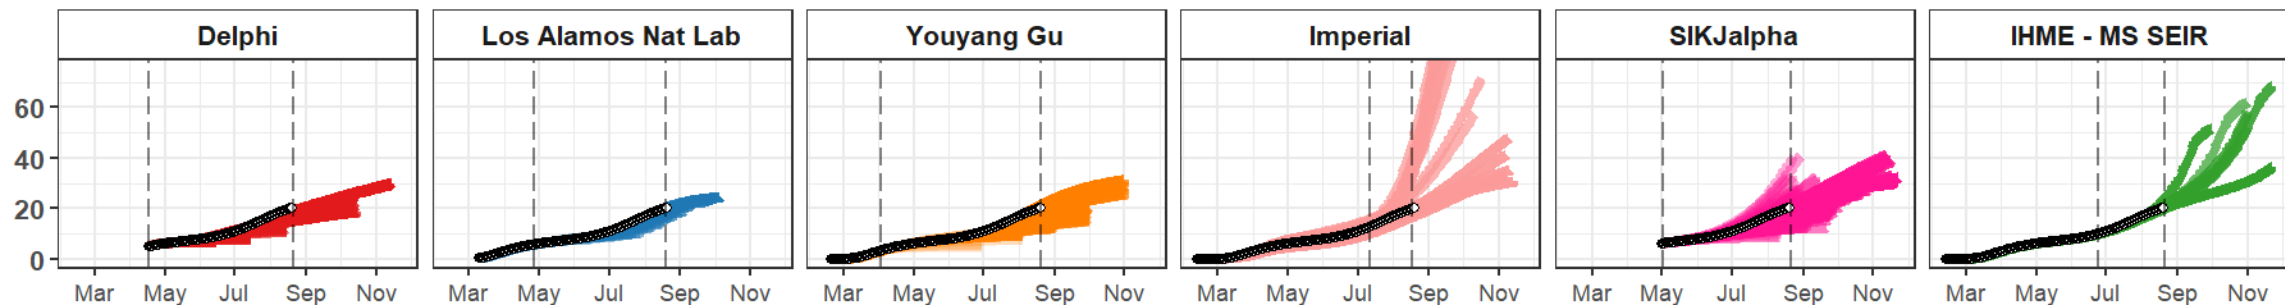

## All Cumulative Errors

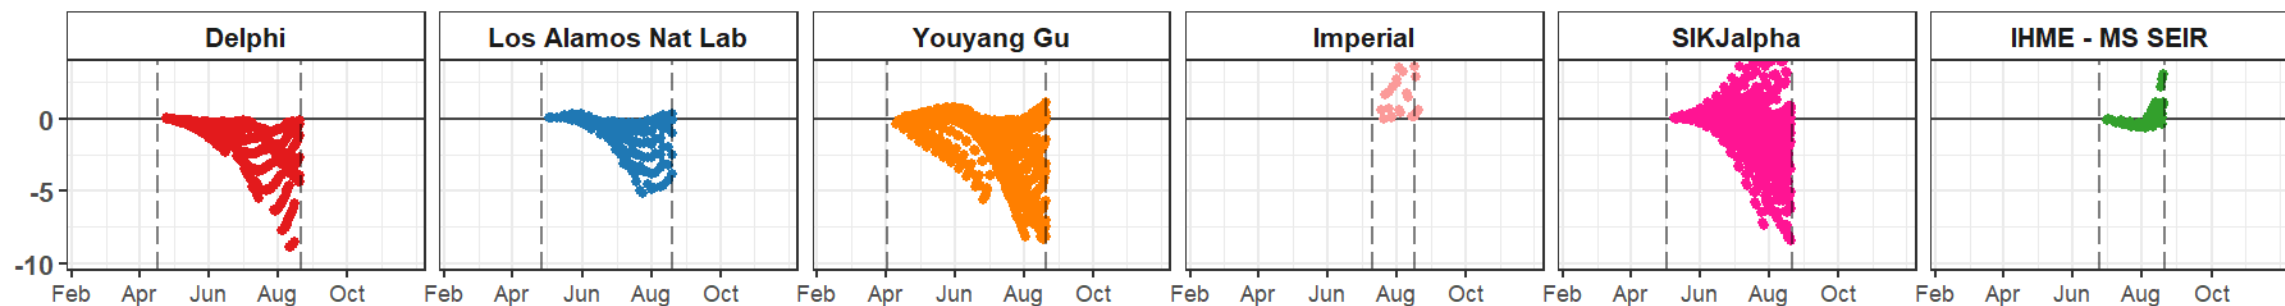

# Colombia

## Current Forecast

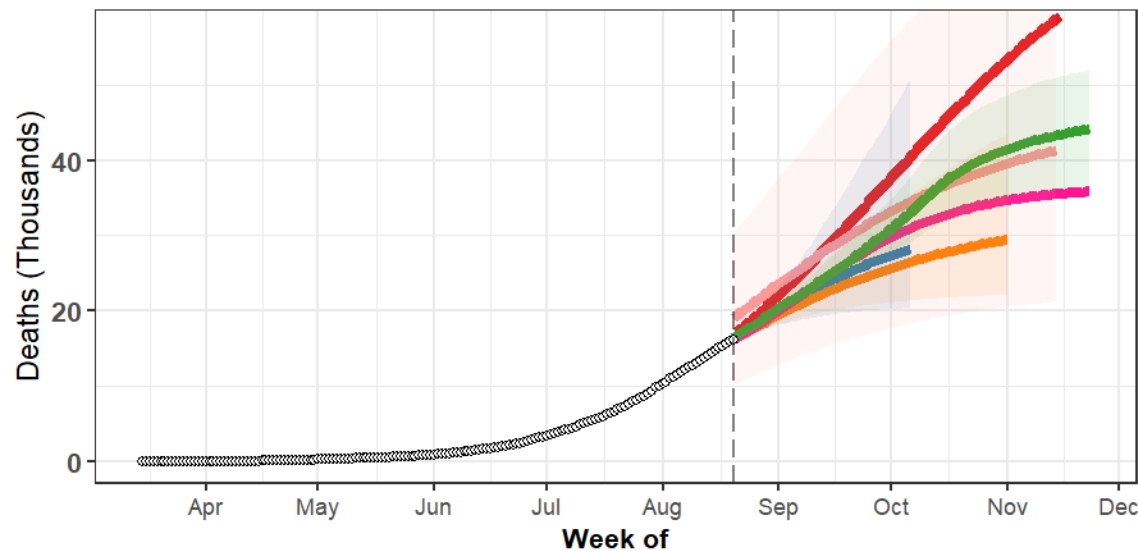

## Cumulative Out-Of-Sample Error (Post Intercept Shift)

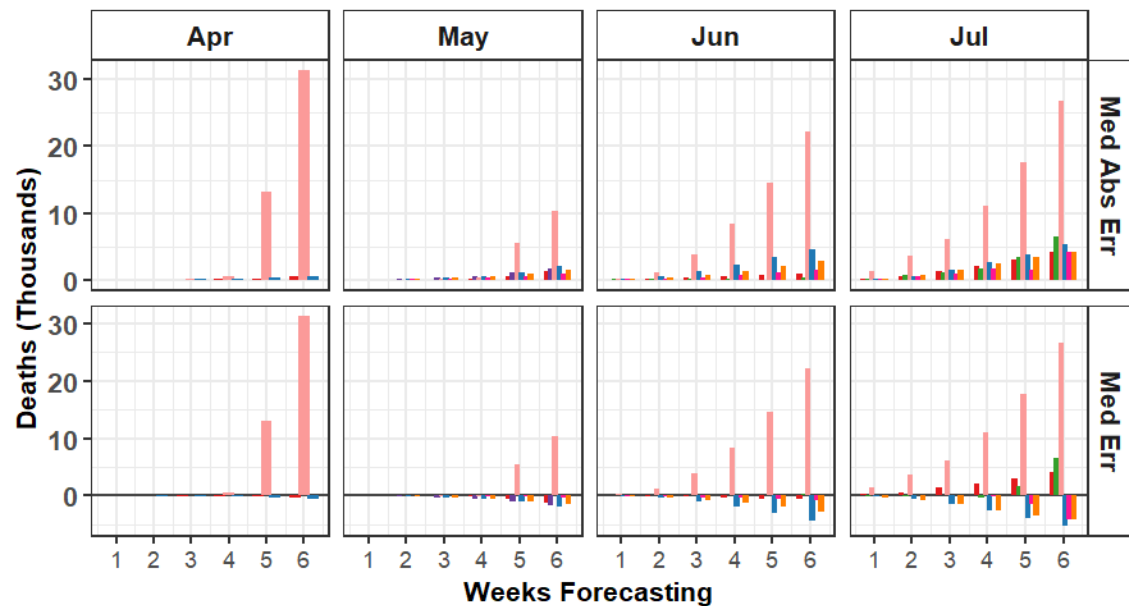

## All Model Versions

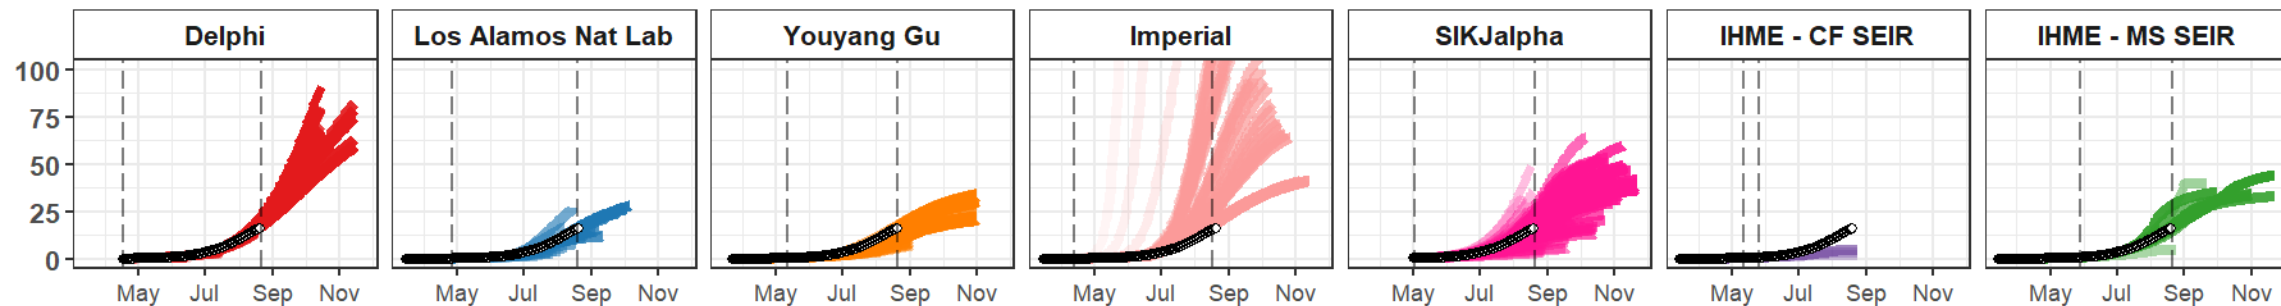

## All Cumulative Errors

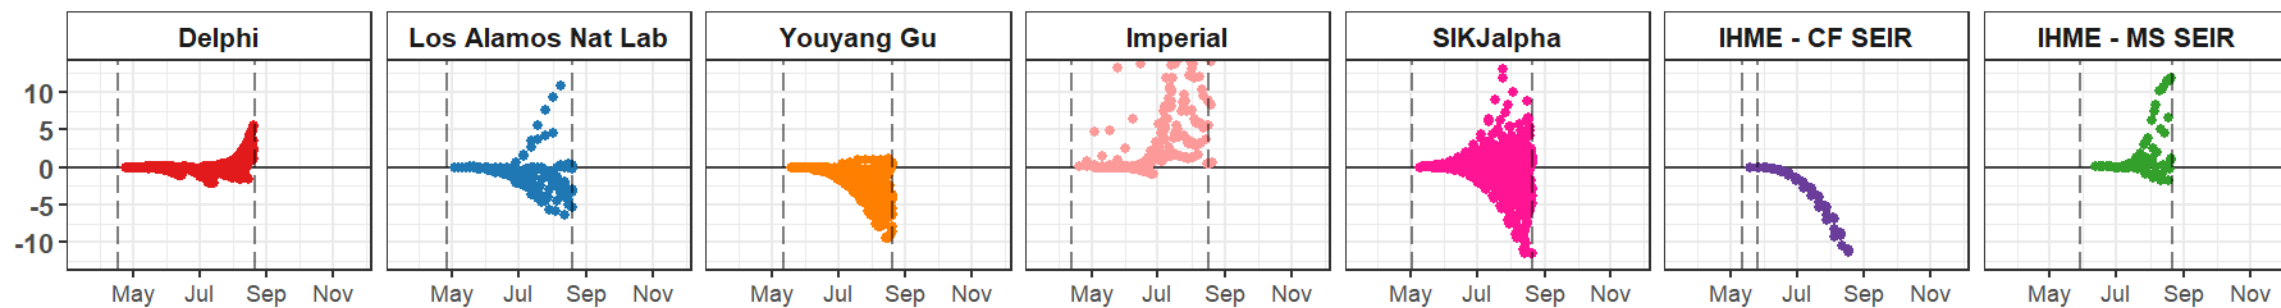

# Russian Federation

## Current Forecast

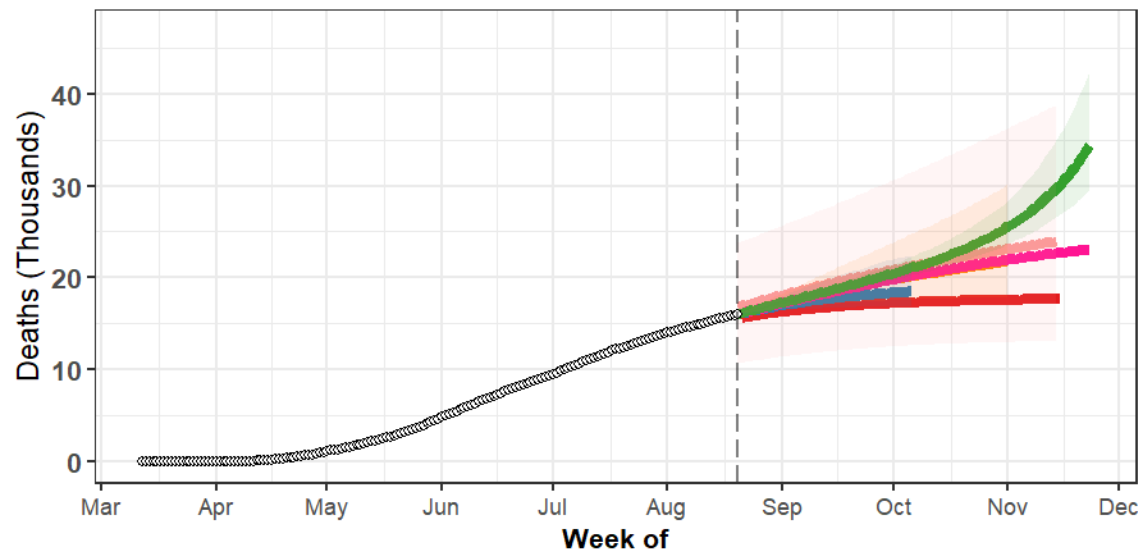

## Cumulative Out-Of-Sample Error (Post Intercept Shift)

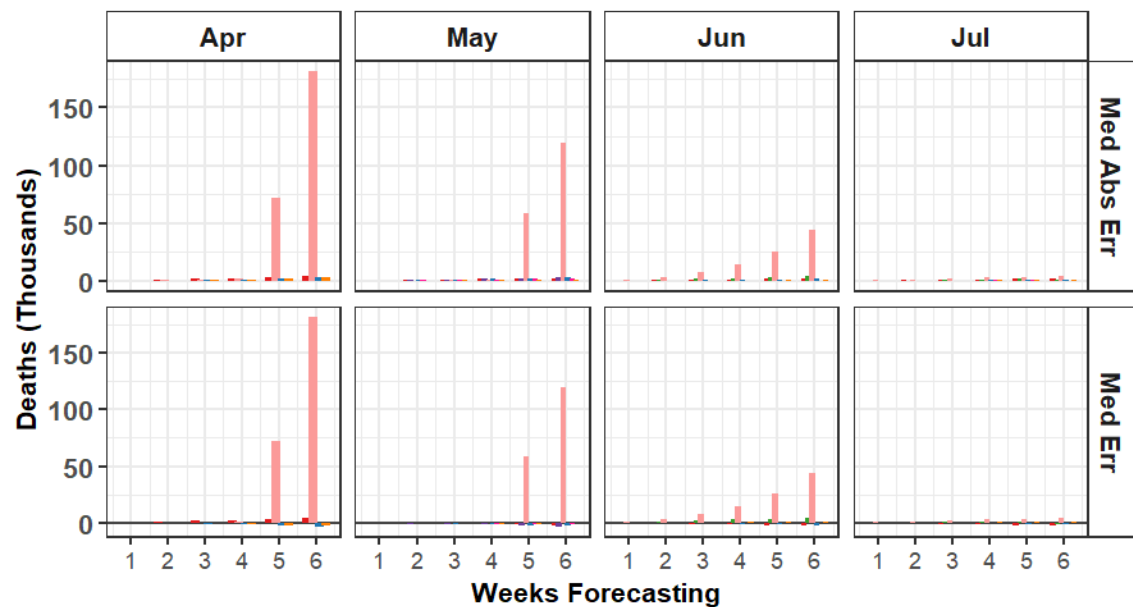

## All Model Versions

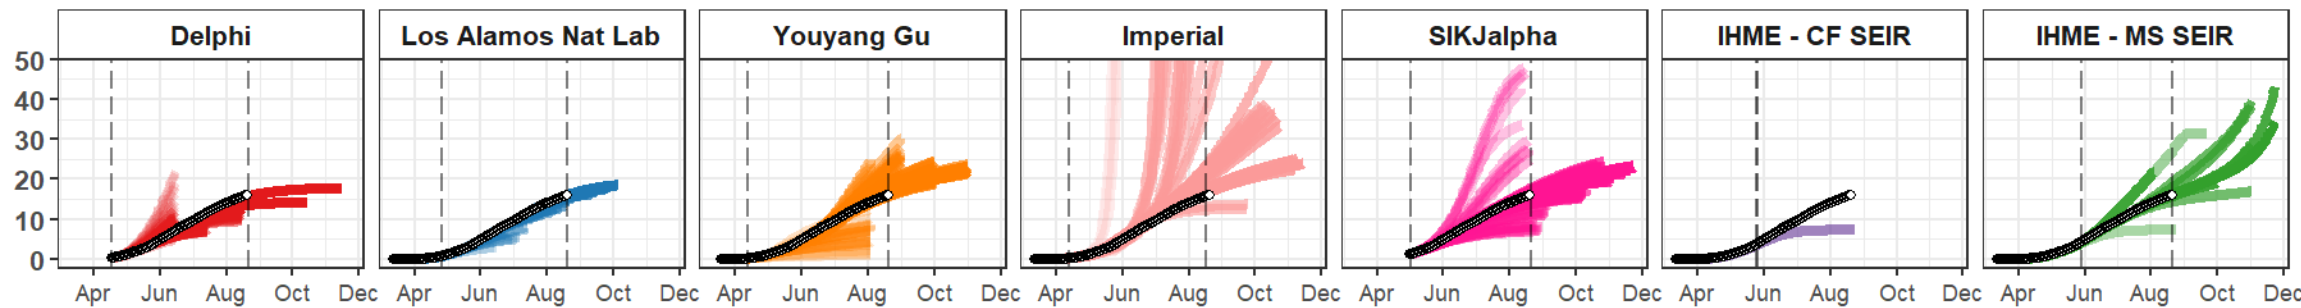

## All Cumulative Errors

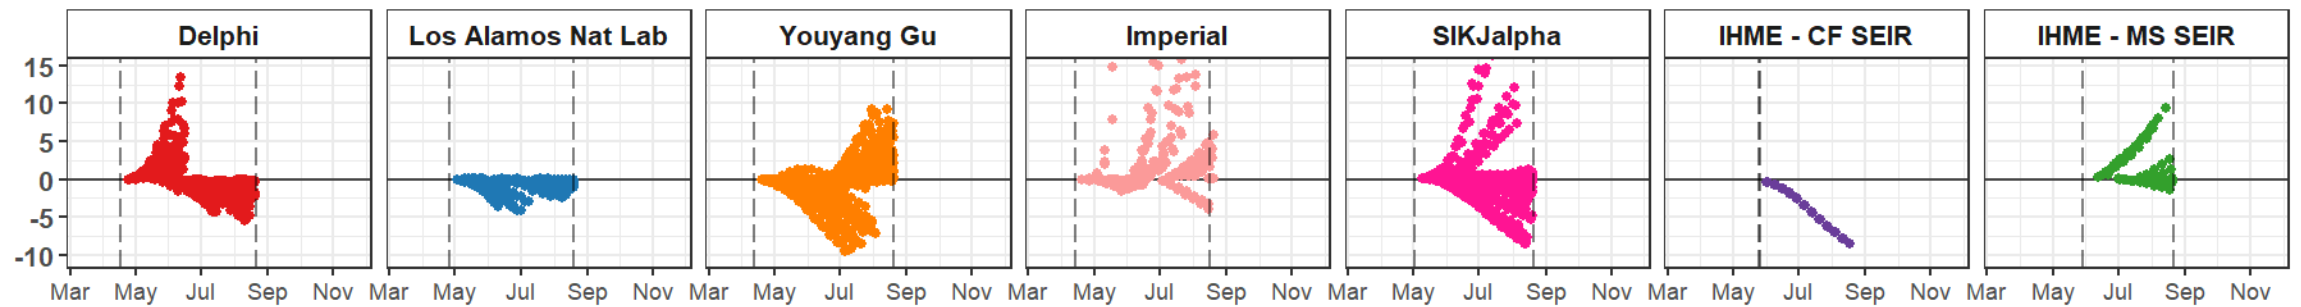

# New Jersey

## Current Forecast

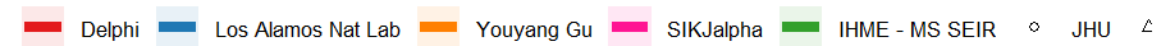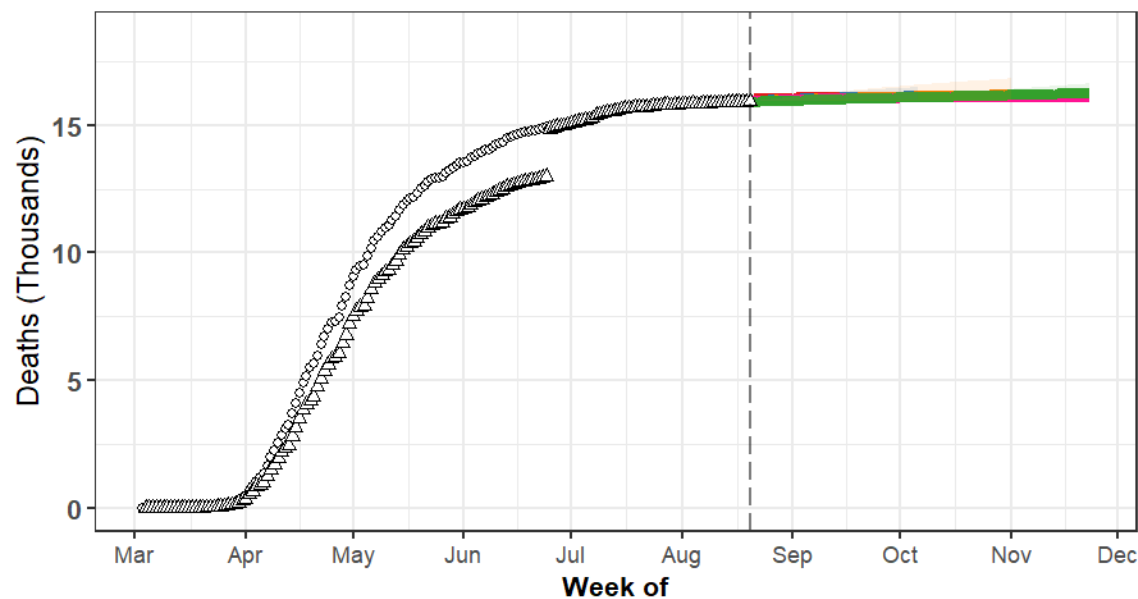

## Cumulative Out-Of-Sample Error (Post Intercept Shift)

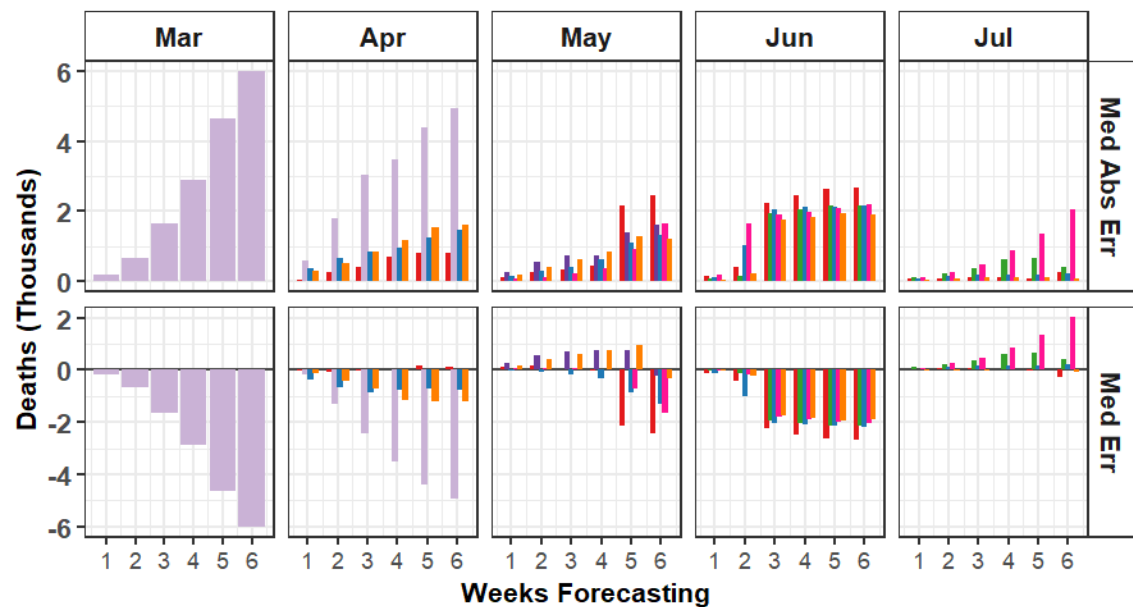

## All Model Versions

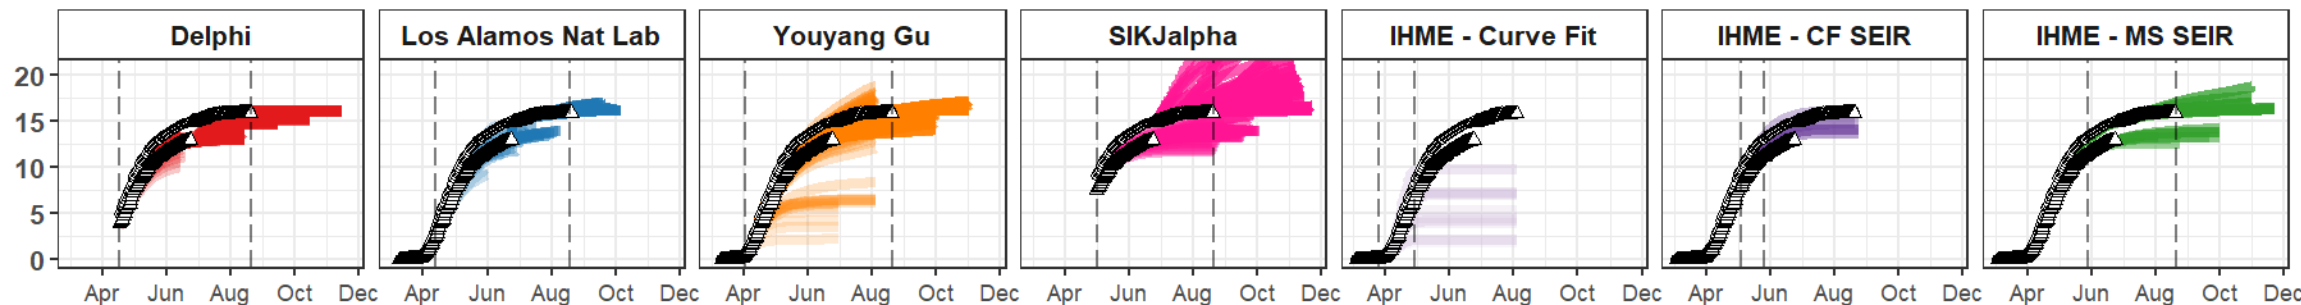

## All Cumulative Errors

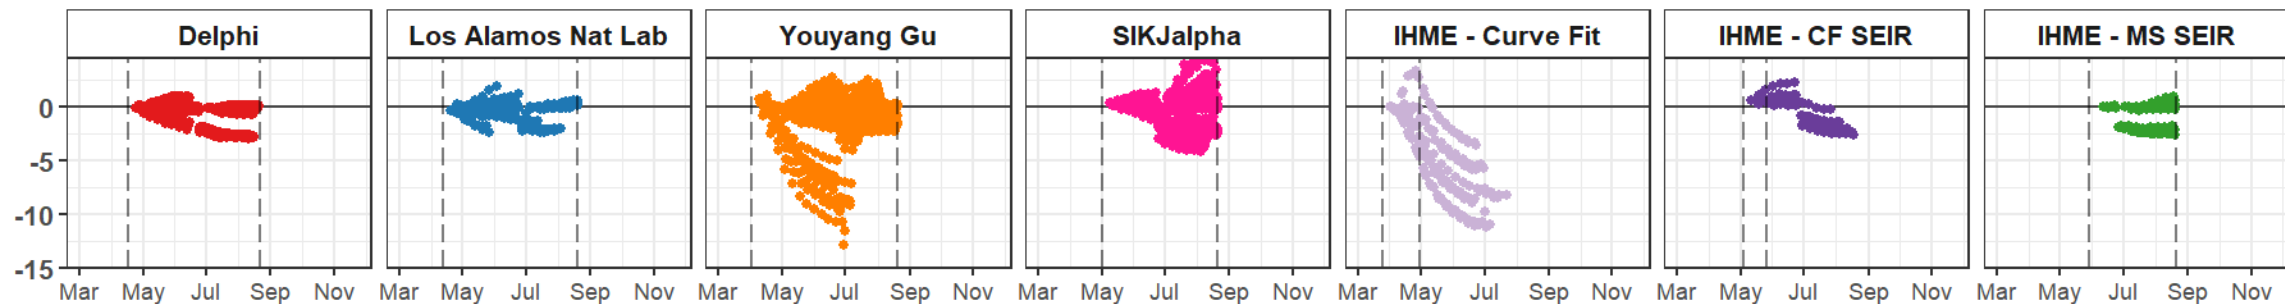

# South Africa

## Current Forecast

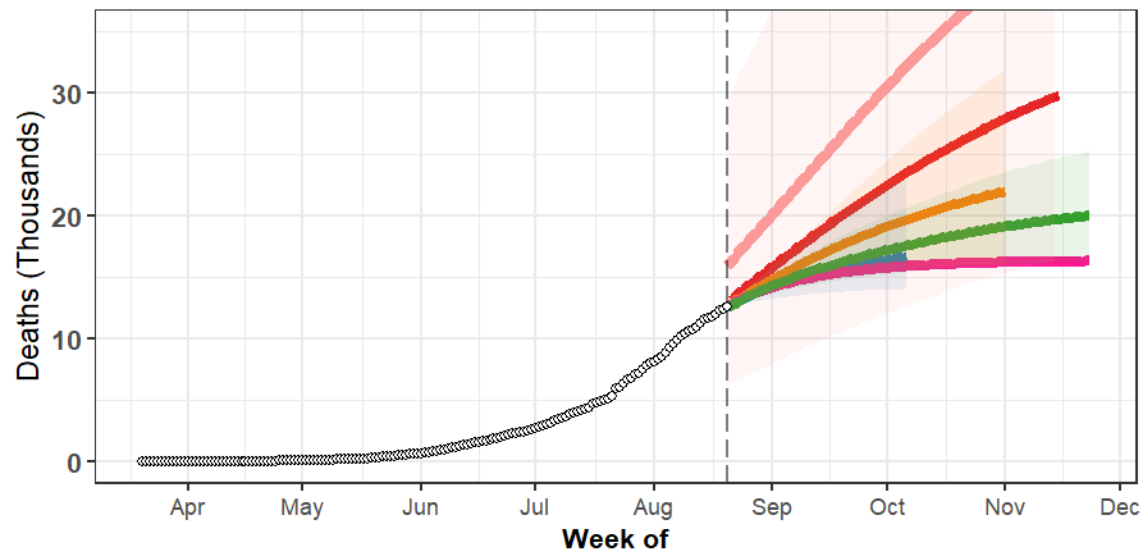

## Cumulative Out-Of-Sample Error (Post Intercept Shift)

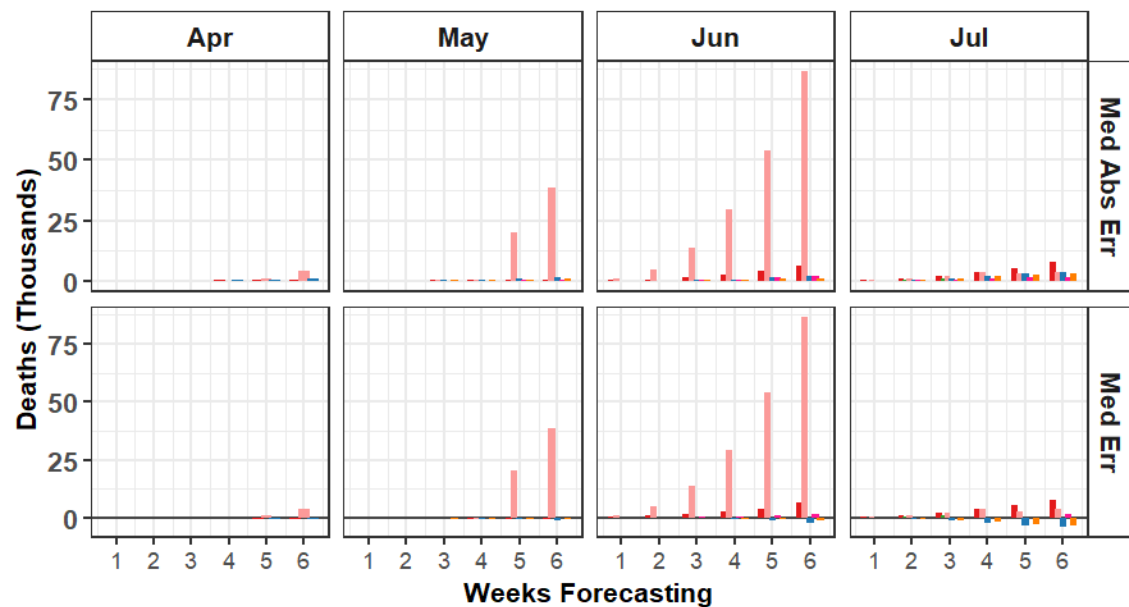

## All Model Versions

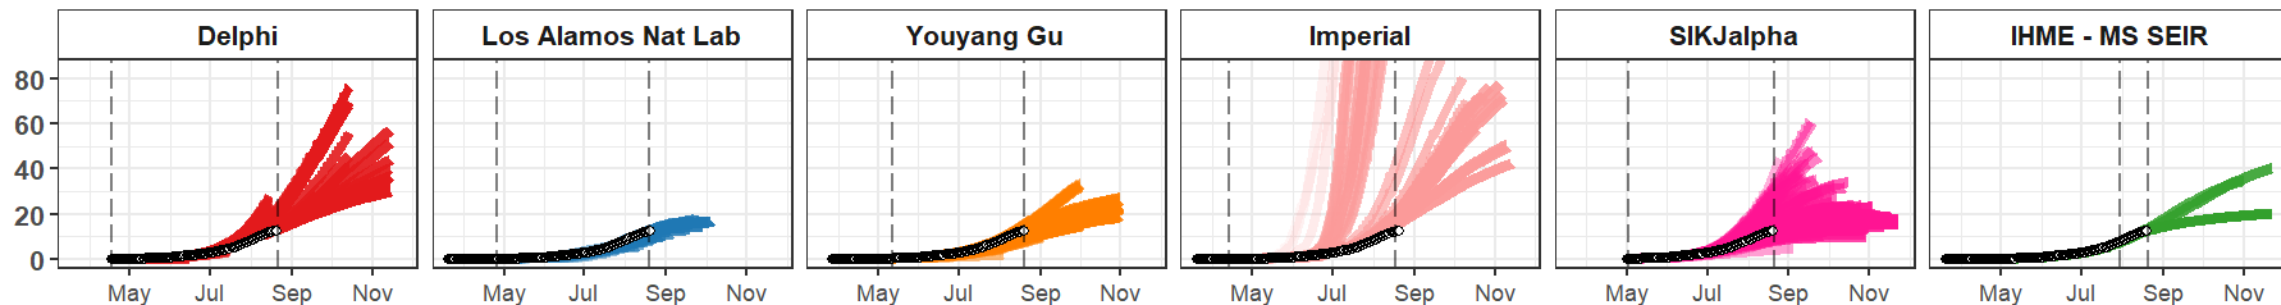

## All Cumulative Errors

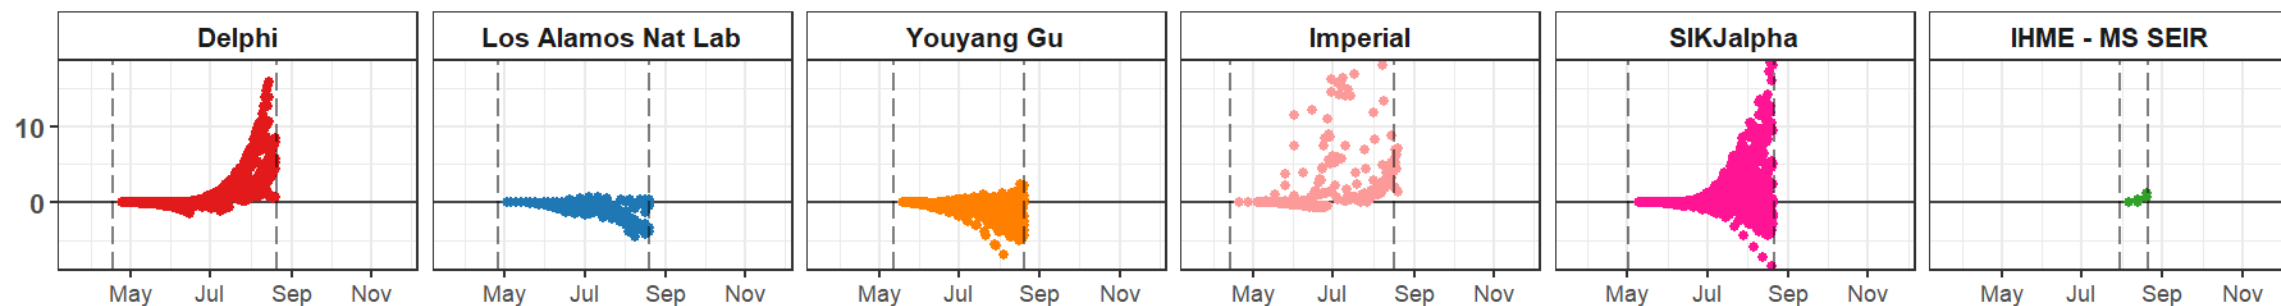

# California

## Current Forecast

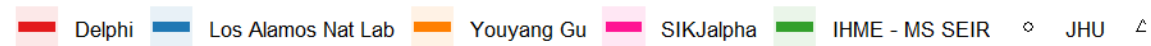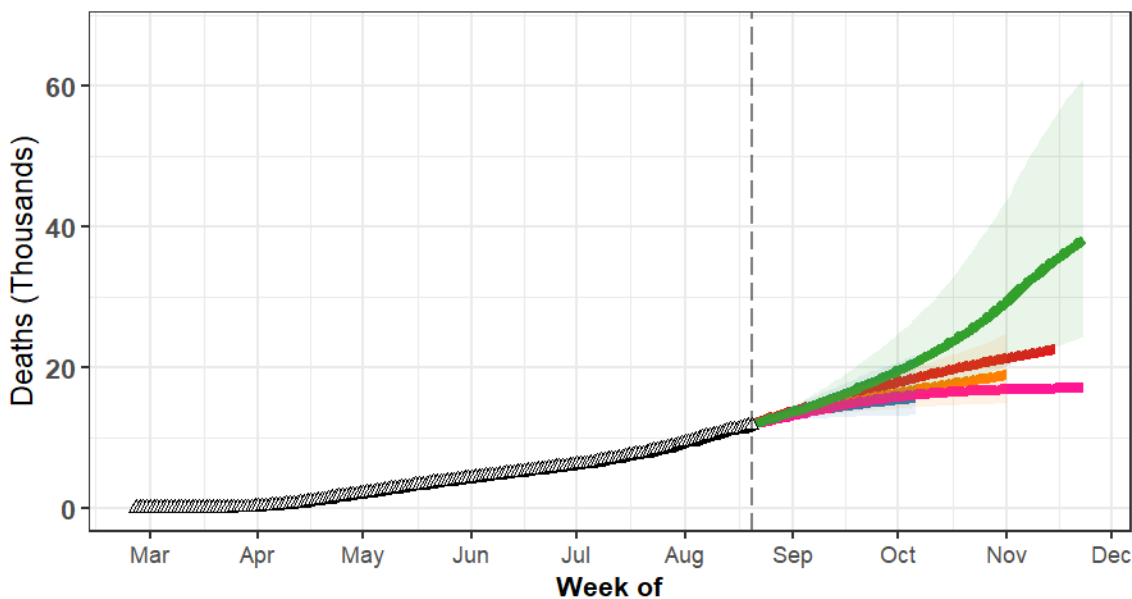

## Cumulative Out-Of-Sample Error (Post Intercept Shift)

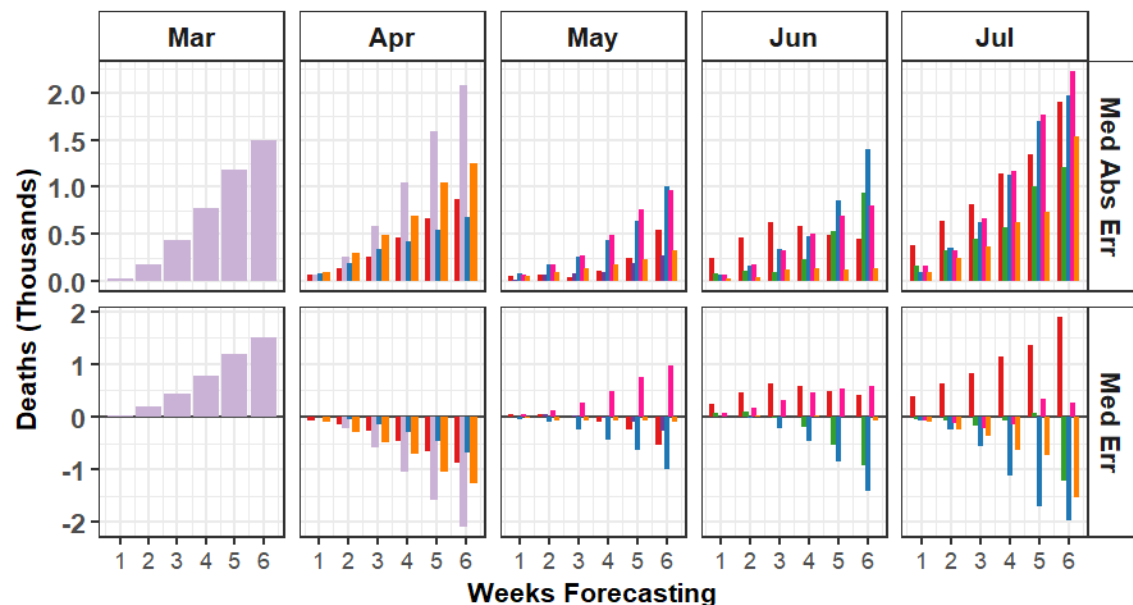

## All Model Versions

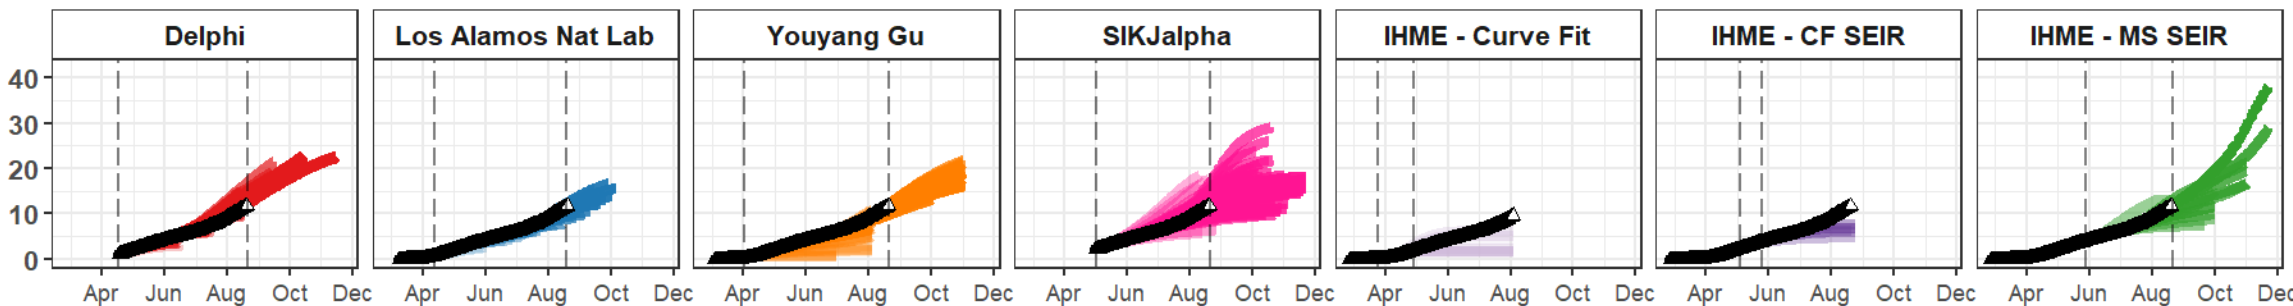

## All Cumulative Errors

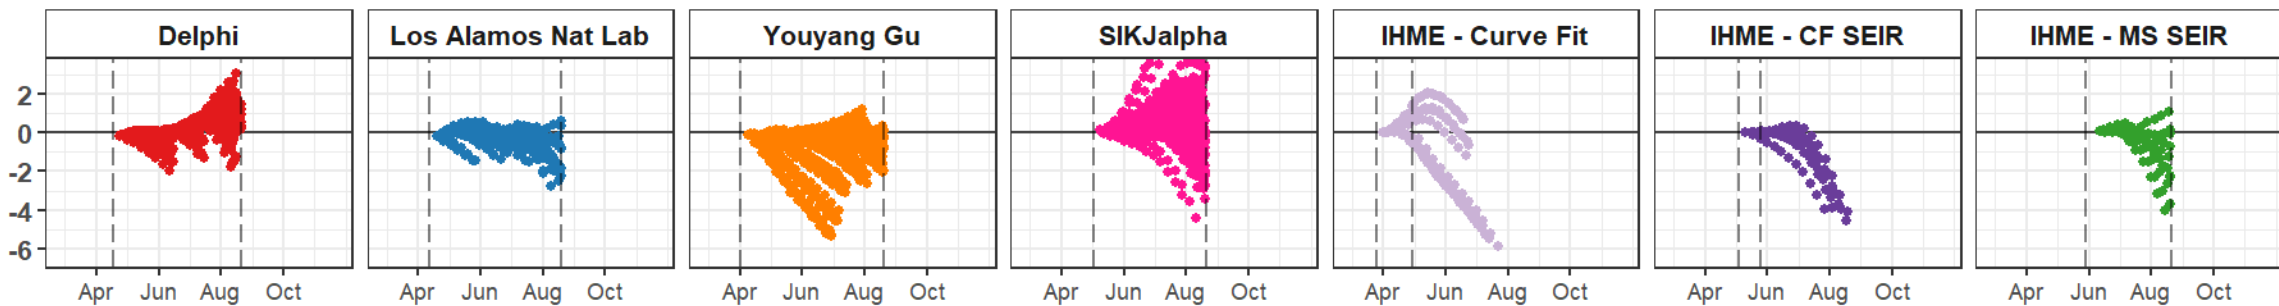

# Texas

## Current Forecast

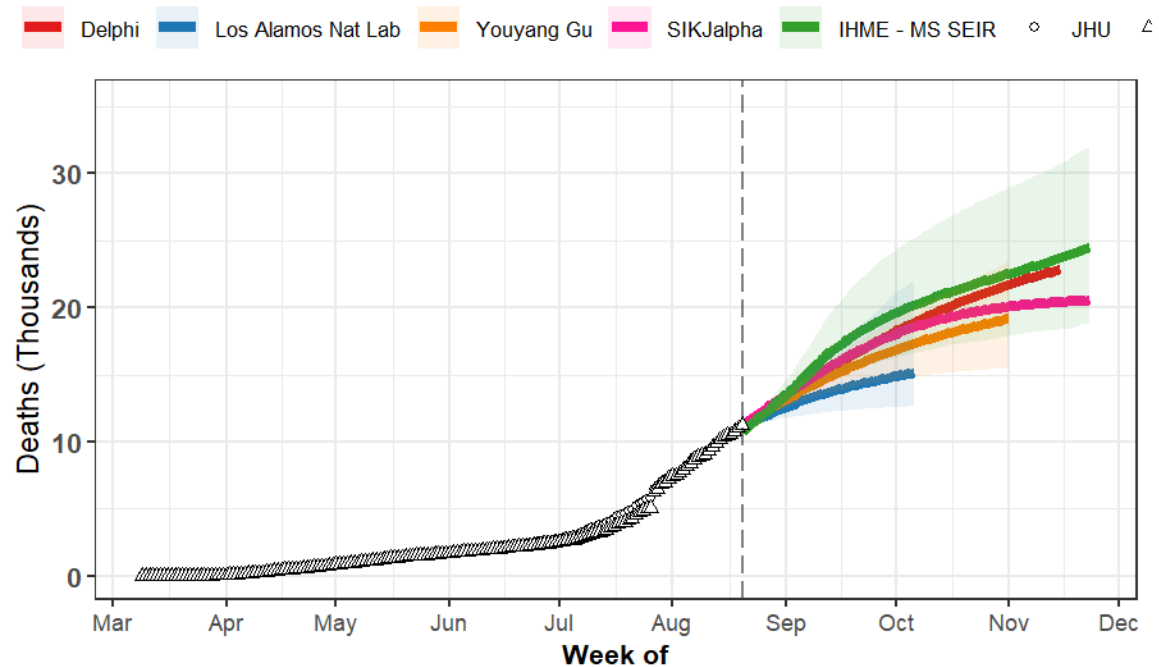

## Cumulative Out-Of-Sample Error (Post Intercept Shift)

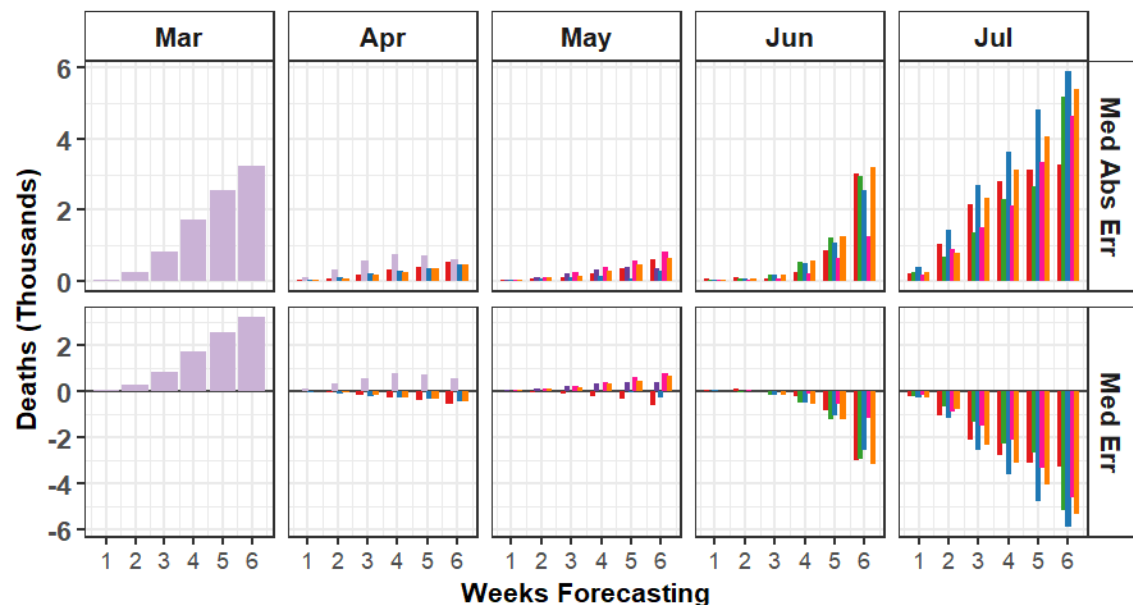

## All Model Versions

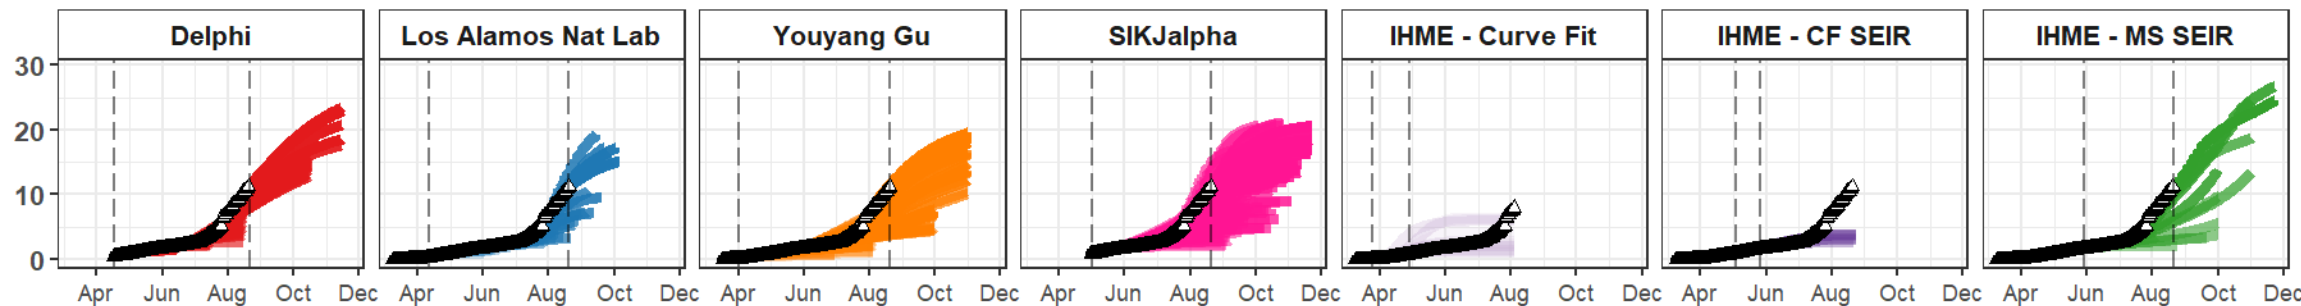

## All Cumulative Errors

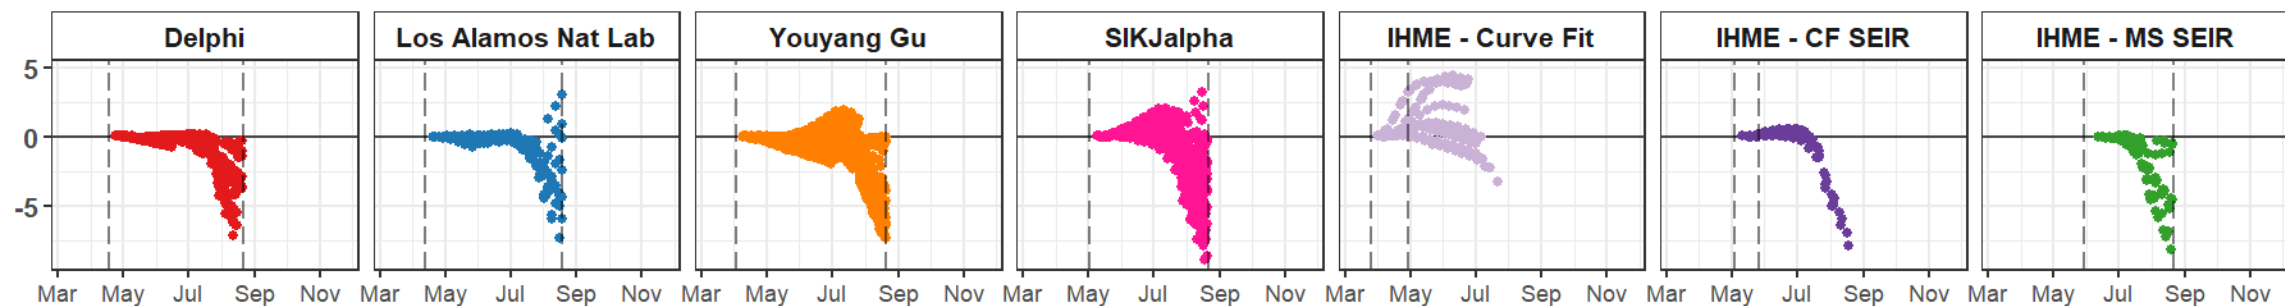



# Chile

## Current Forecast

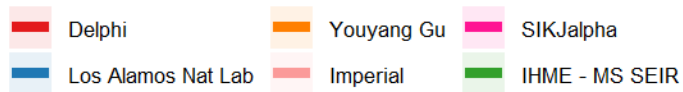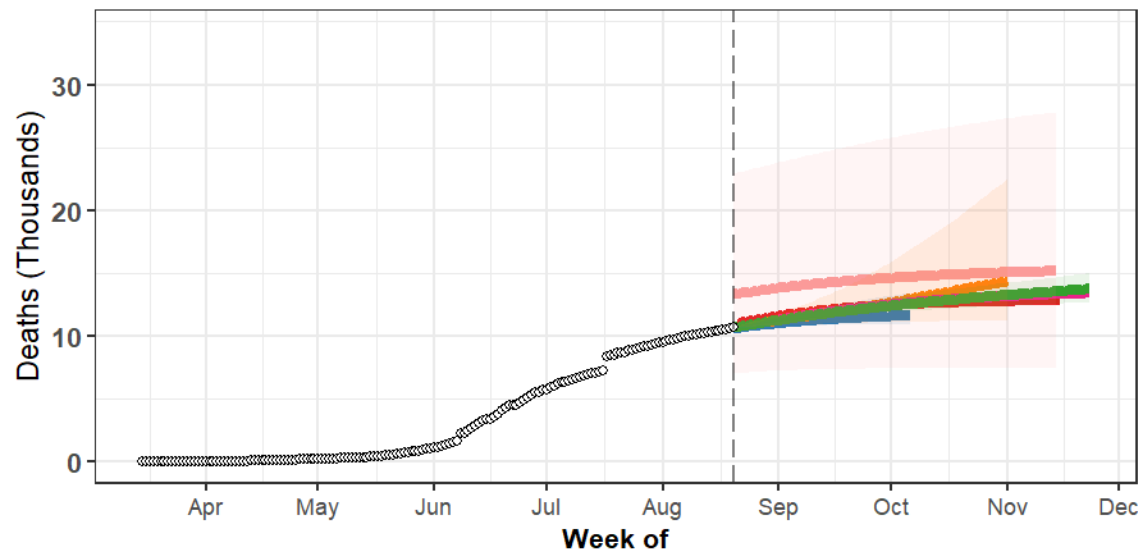

## Cumulative Out-Of-Sample Error (Post Intercept Shift)

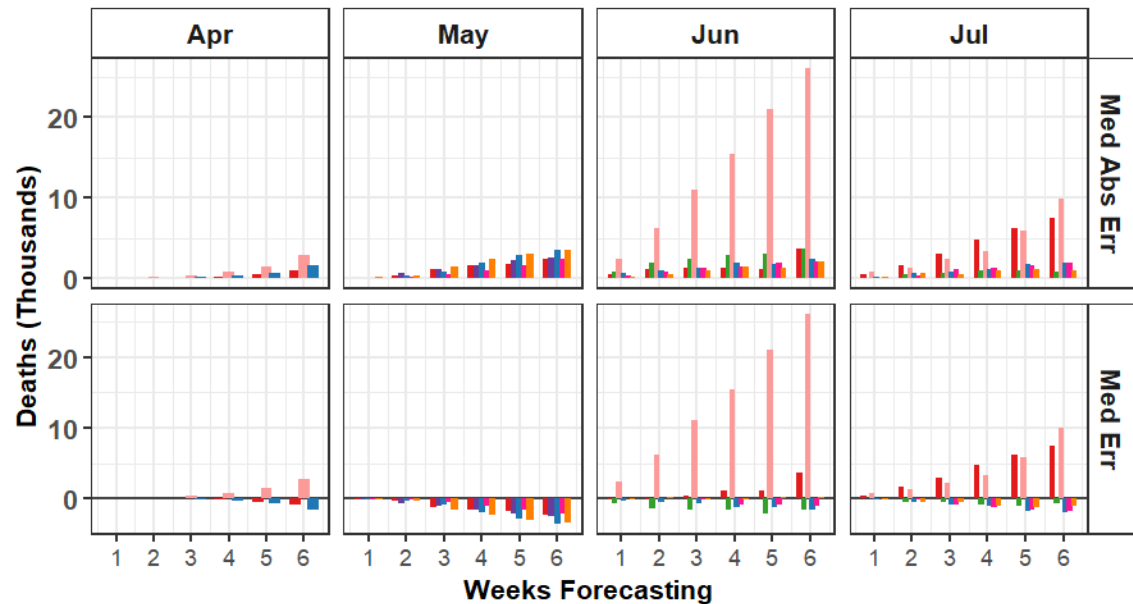

## All Model Versions

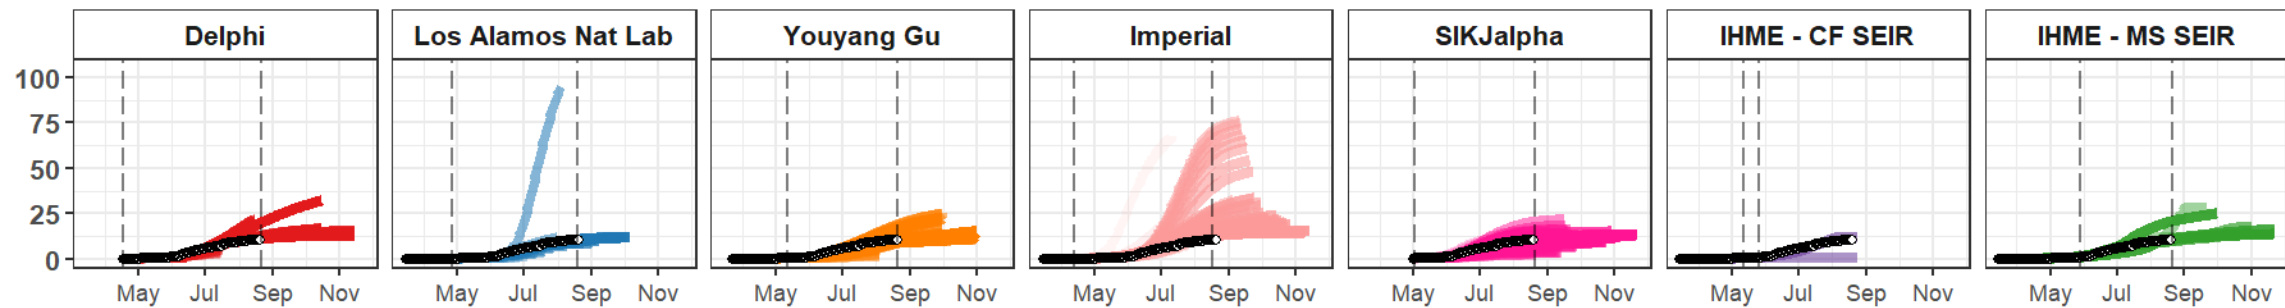

## All Cumulative Errors

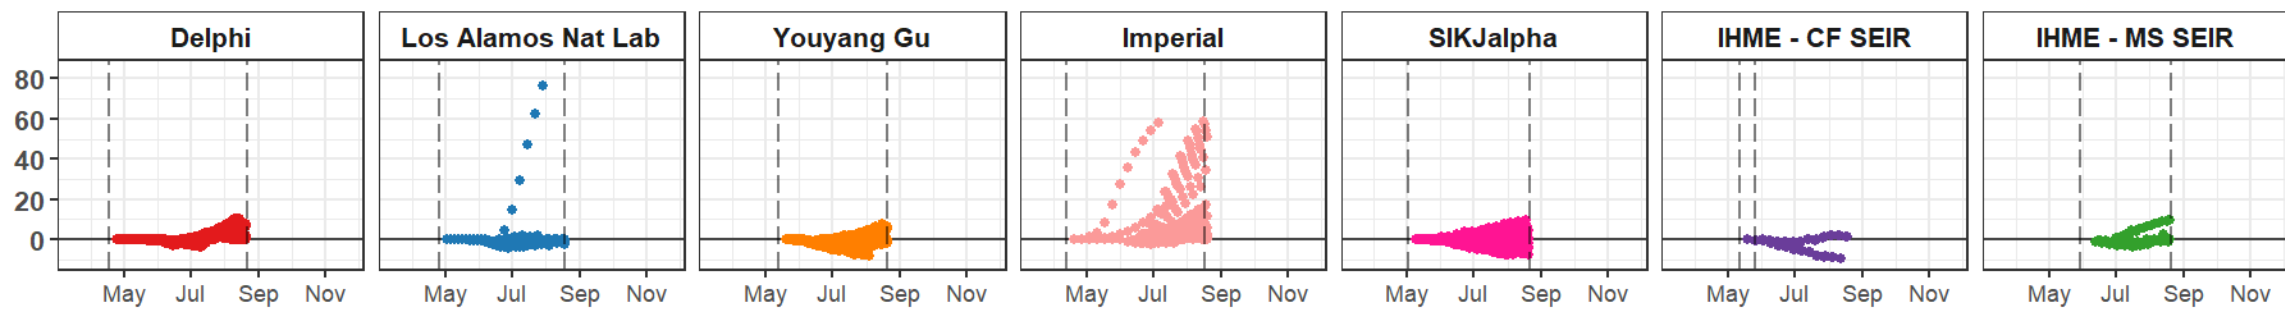

# Florida

## Current Forecast

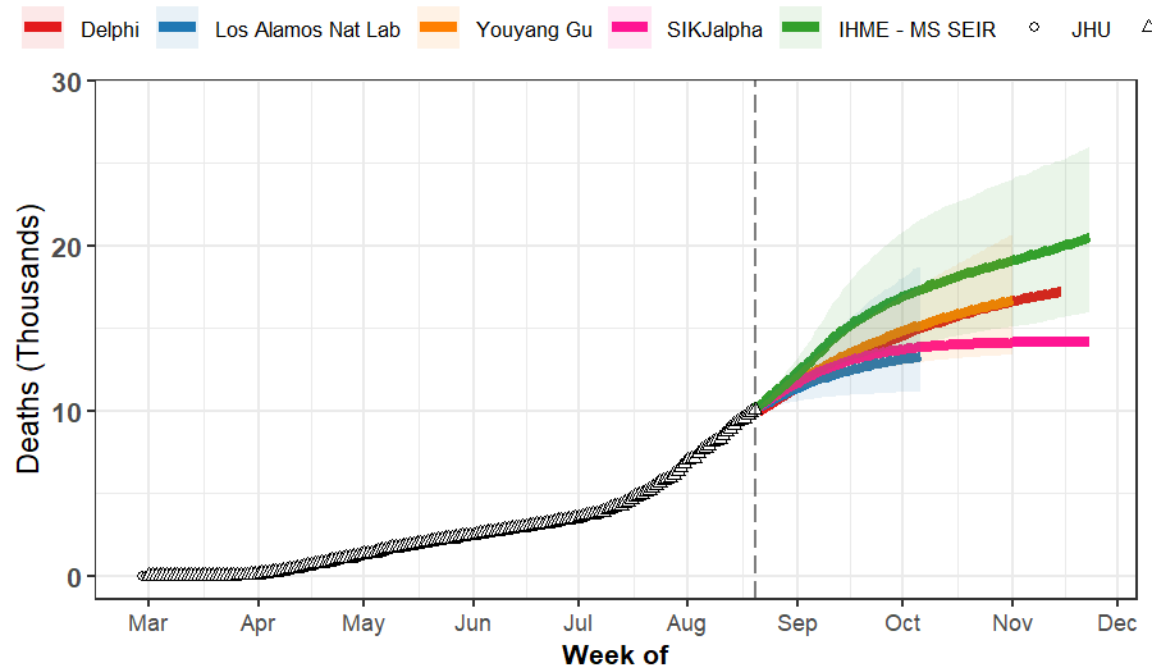

## Cumulative Out-Of-Sample Error (Post Intercept Shift)

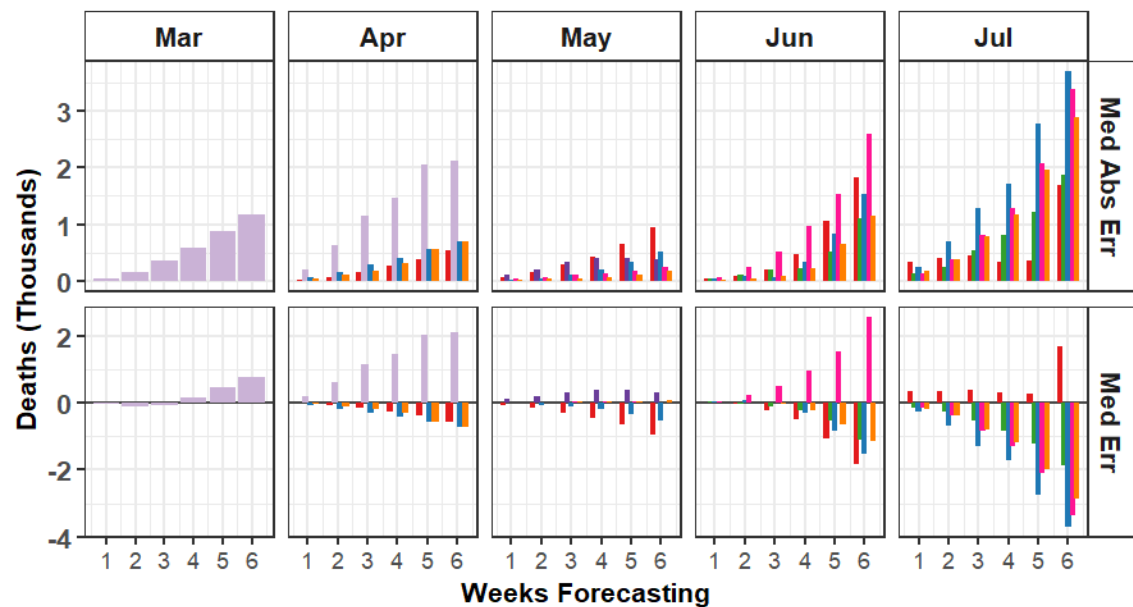

## All Model Versions

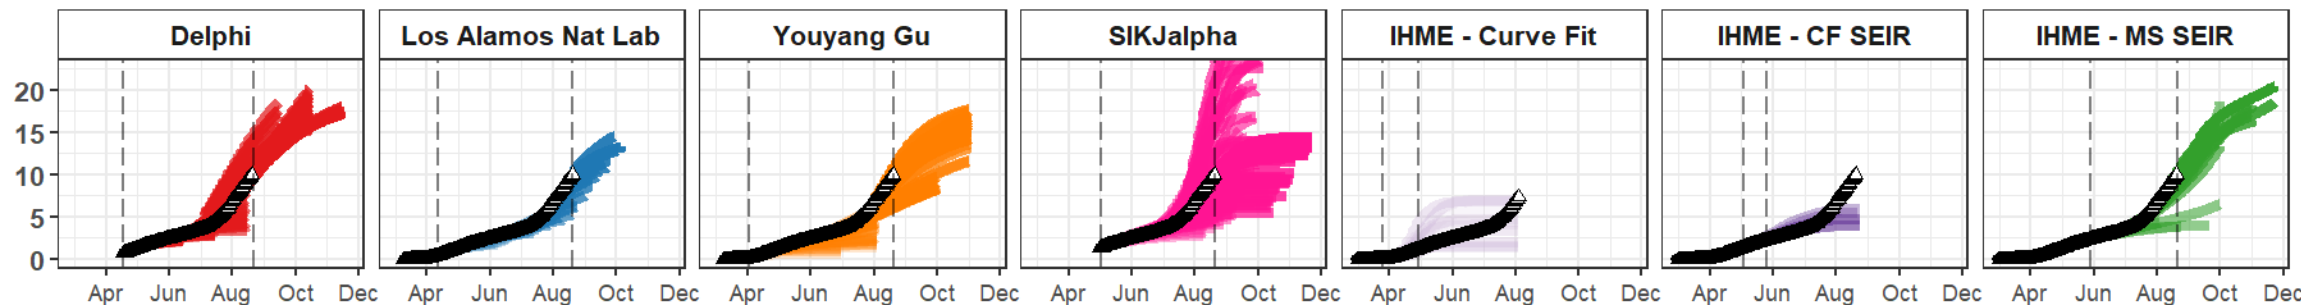

## All Cumulative Errors

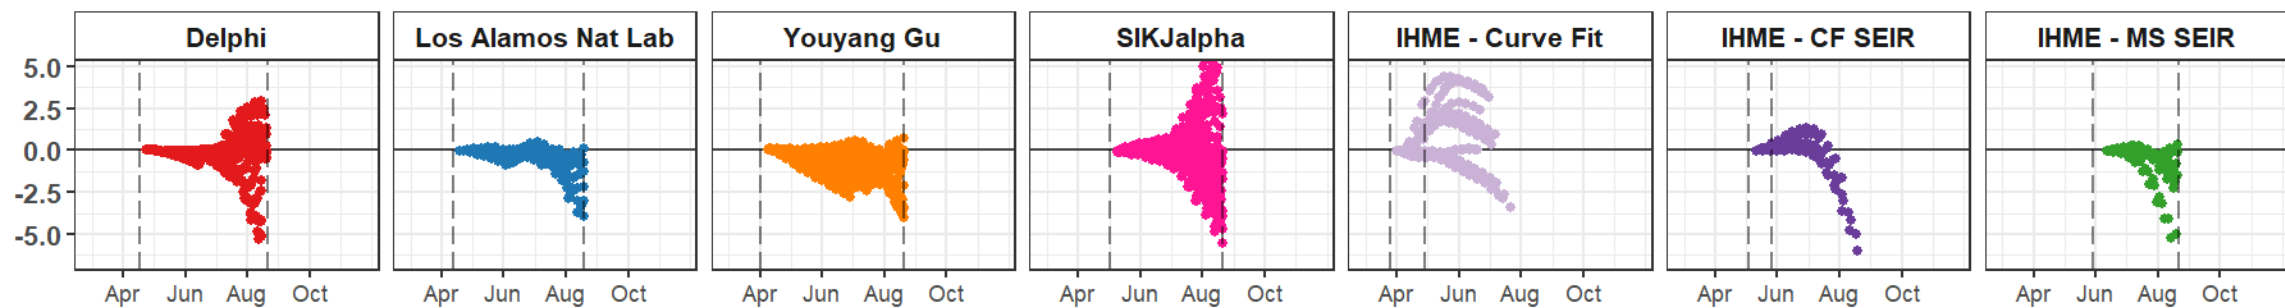

# Belgium

## Current Forecast

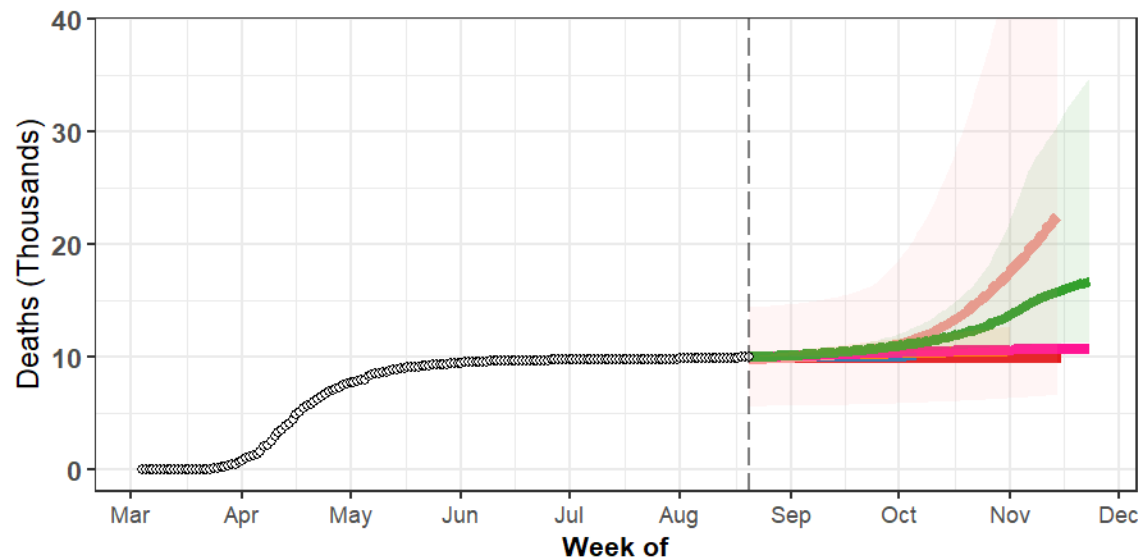

## Cumulative Out-Of-Sample Error (Post Intercept Shift)

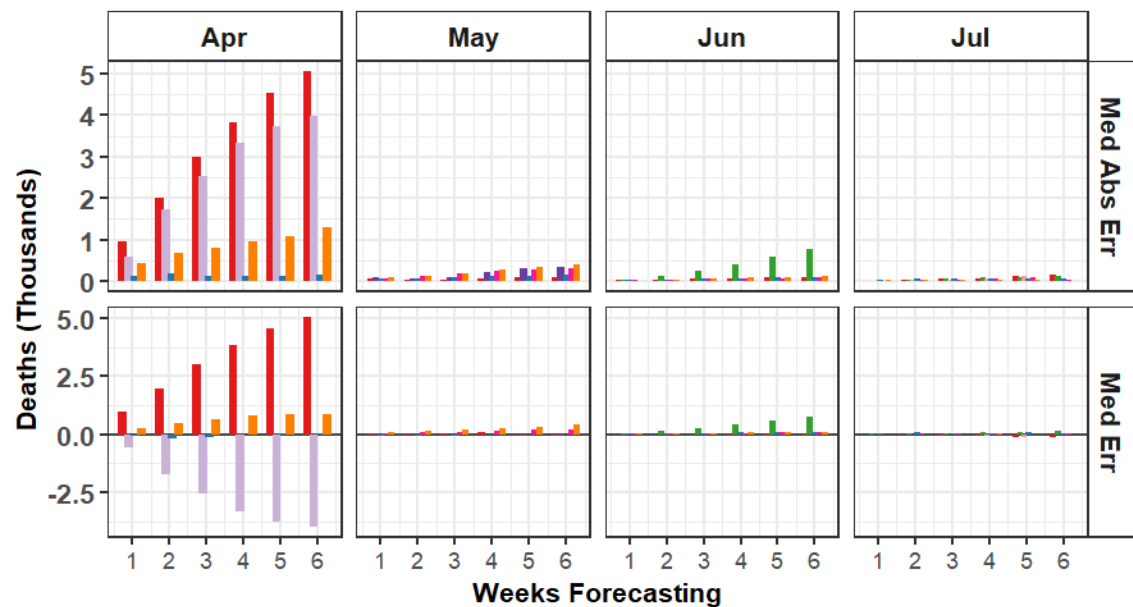

## All Model Versions

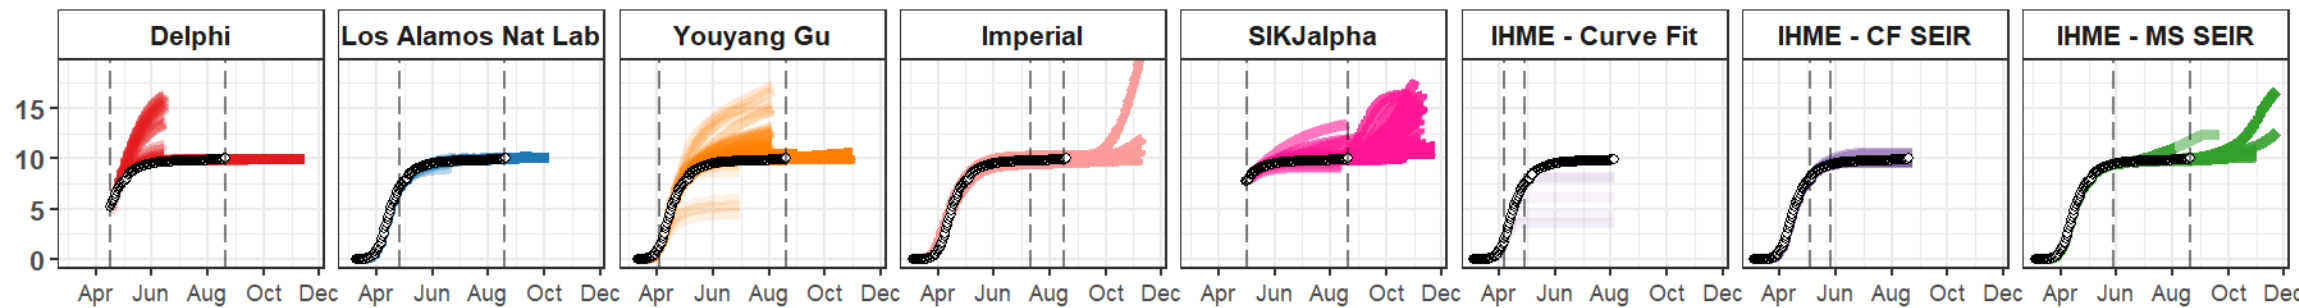

## All Cumulative Errors

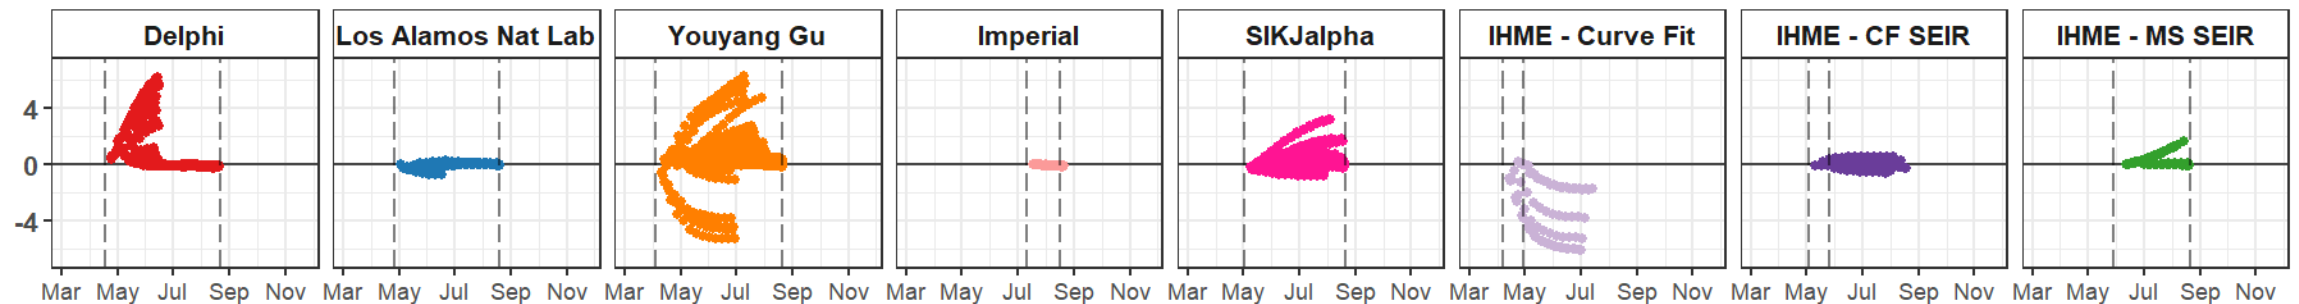

# Germany

## Current Forecast

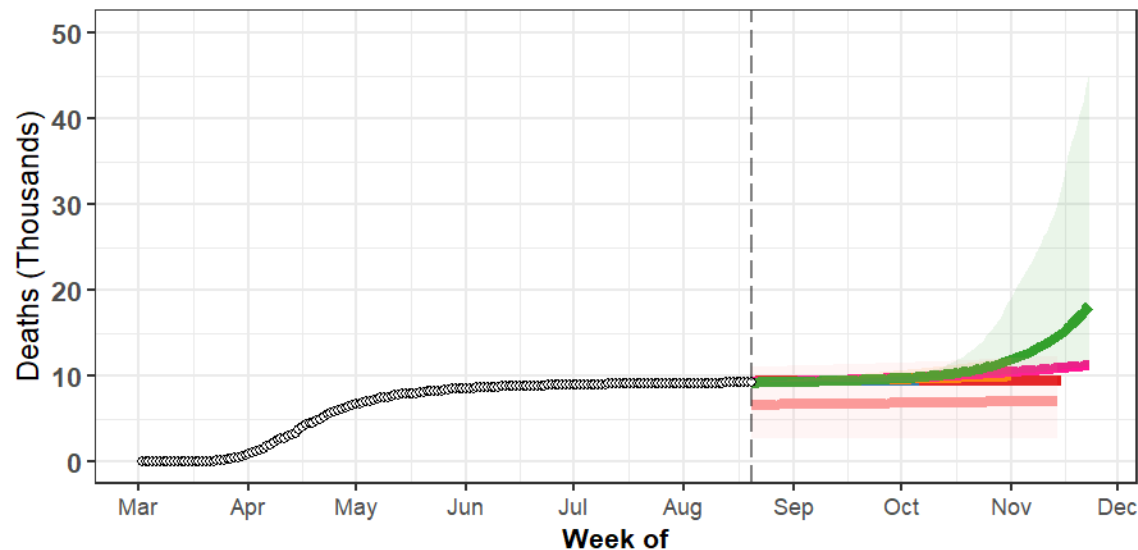

## Cumulative Out-Of-Sample Error (Post Intercept Shift)

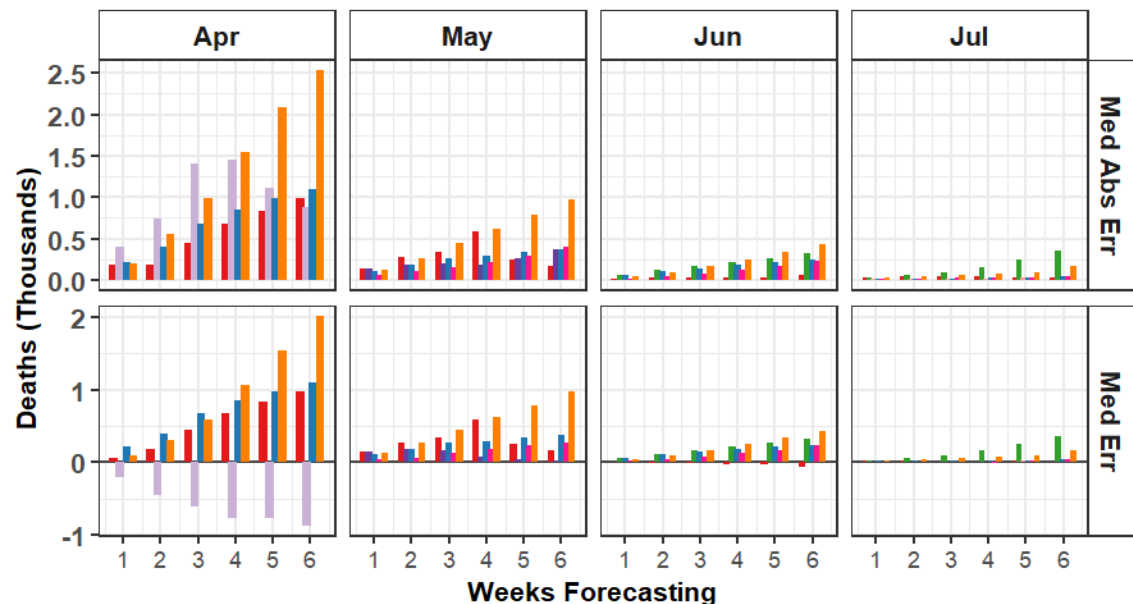

## All Model Versions

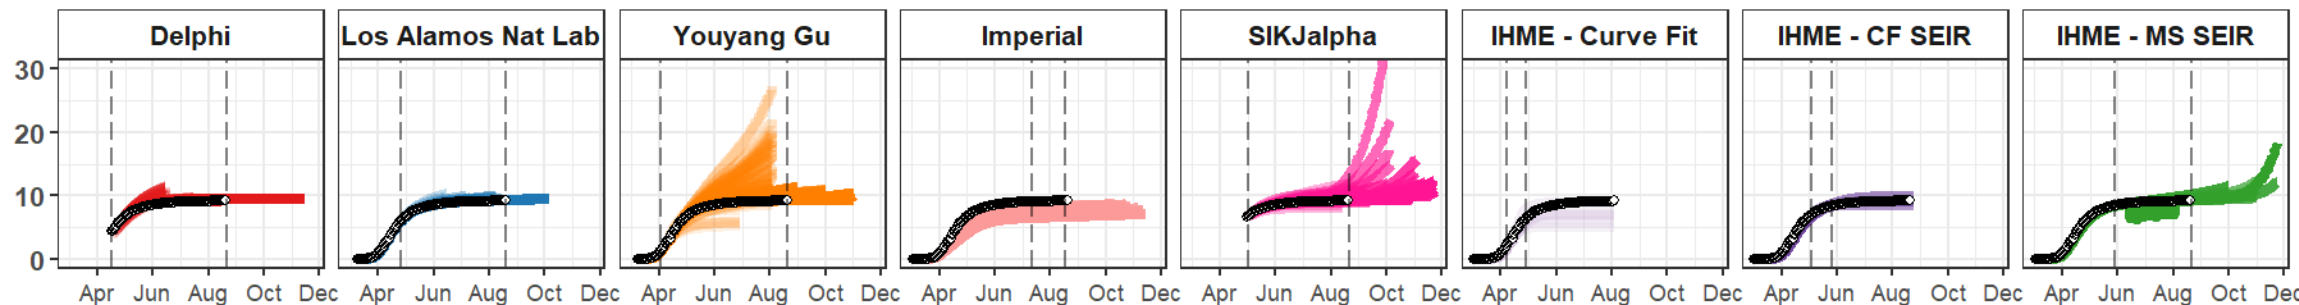

## All Cumulative Errors

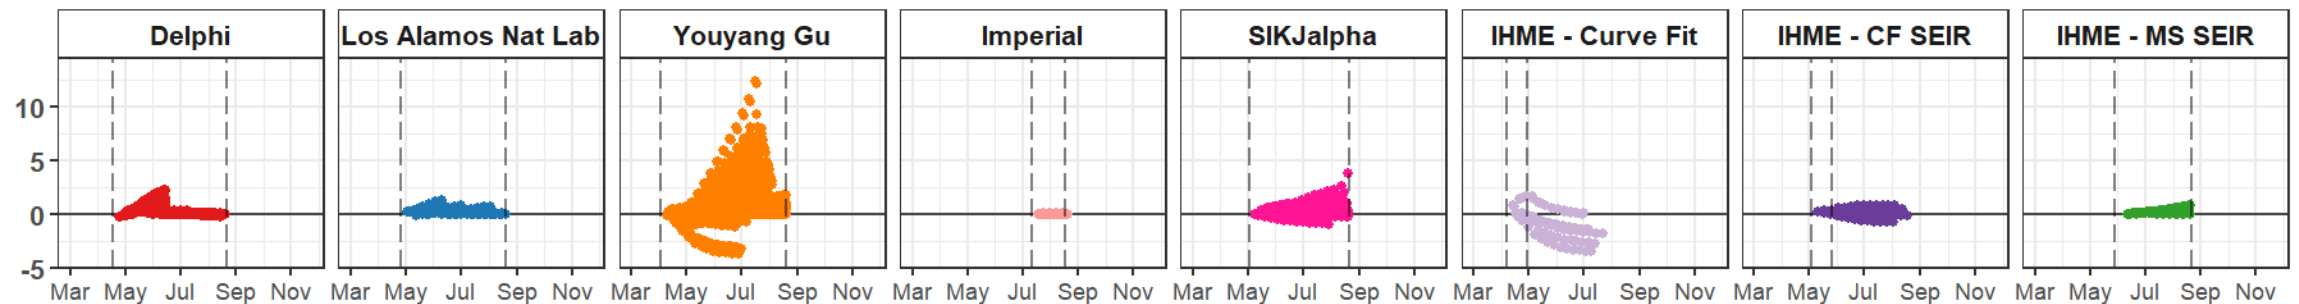

# Canada

## Current Forecast

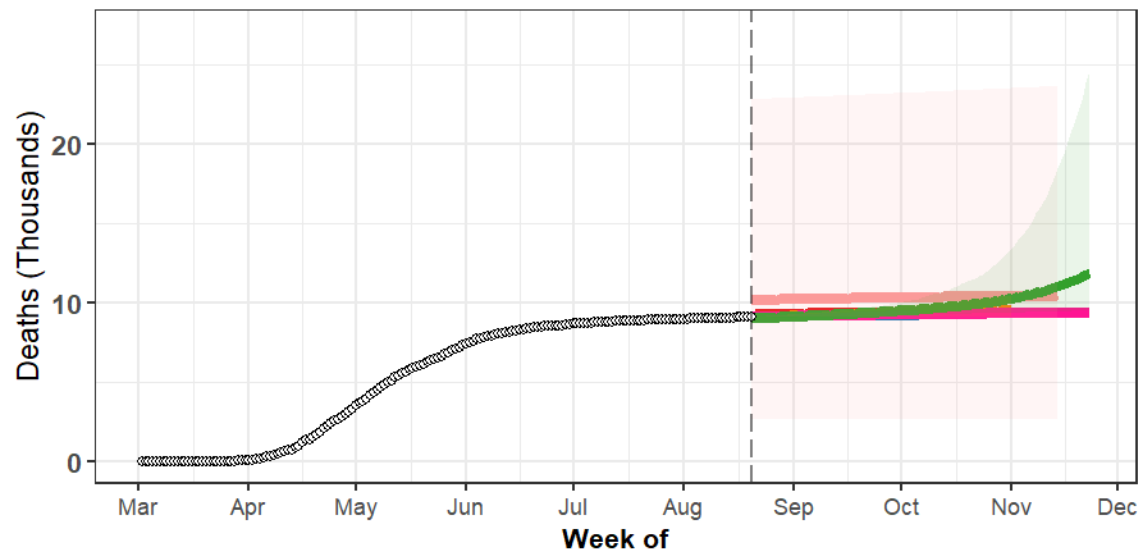

## Cumulative Out-Of-Sample Error (Post Intercept Shift)

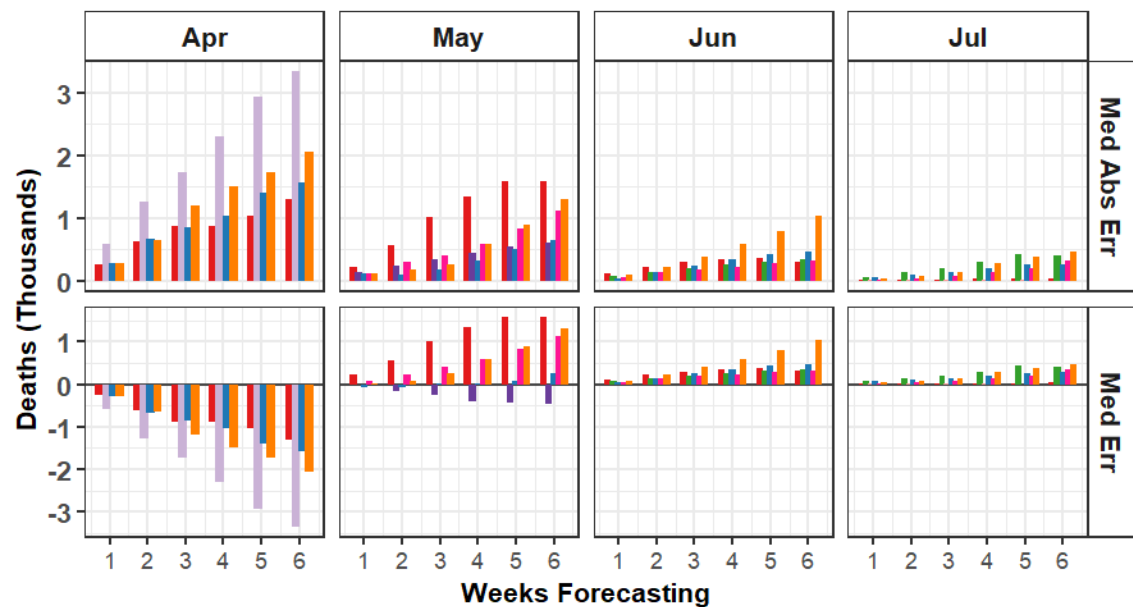

## All Model Versions

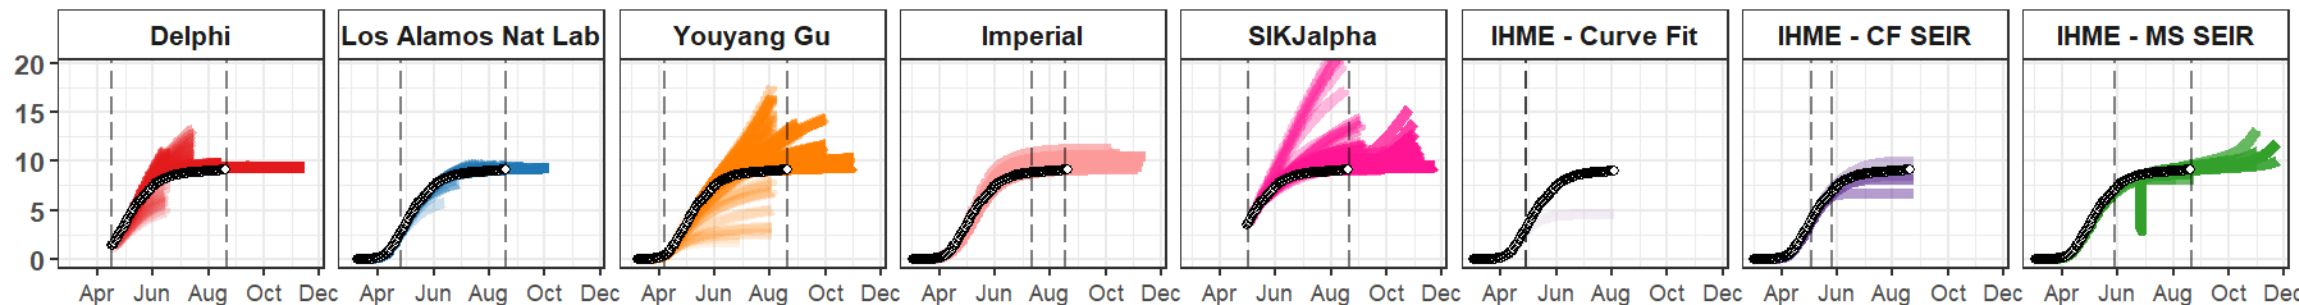

## All Cumulative Errors

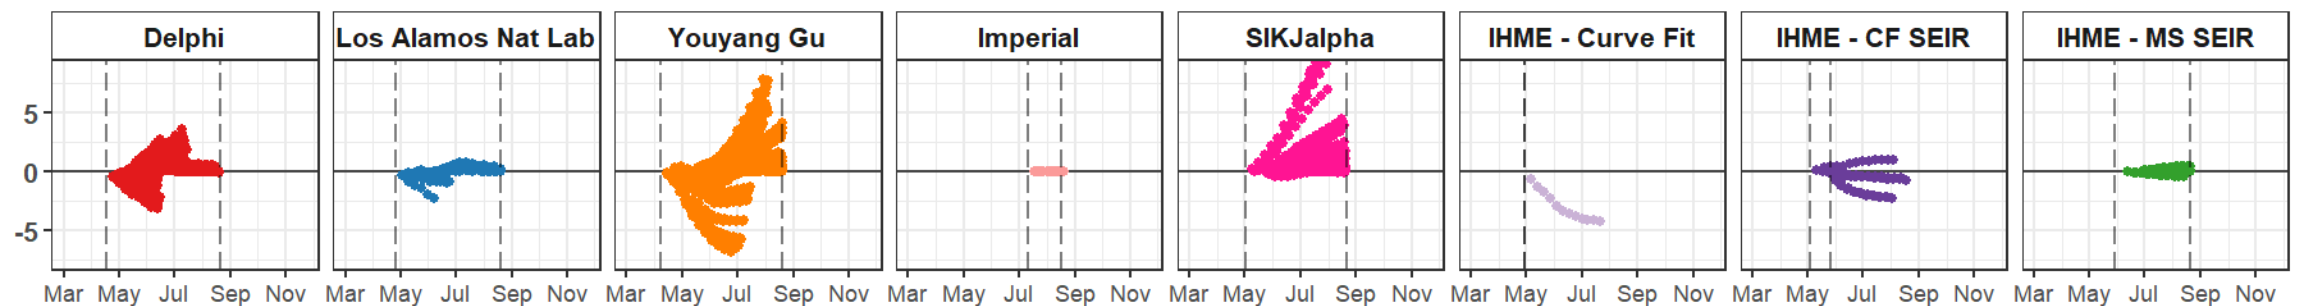

# Massachusetts

## Current Forecast

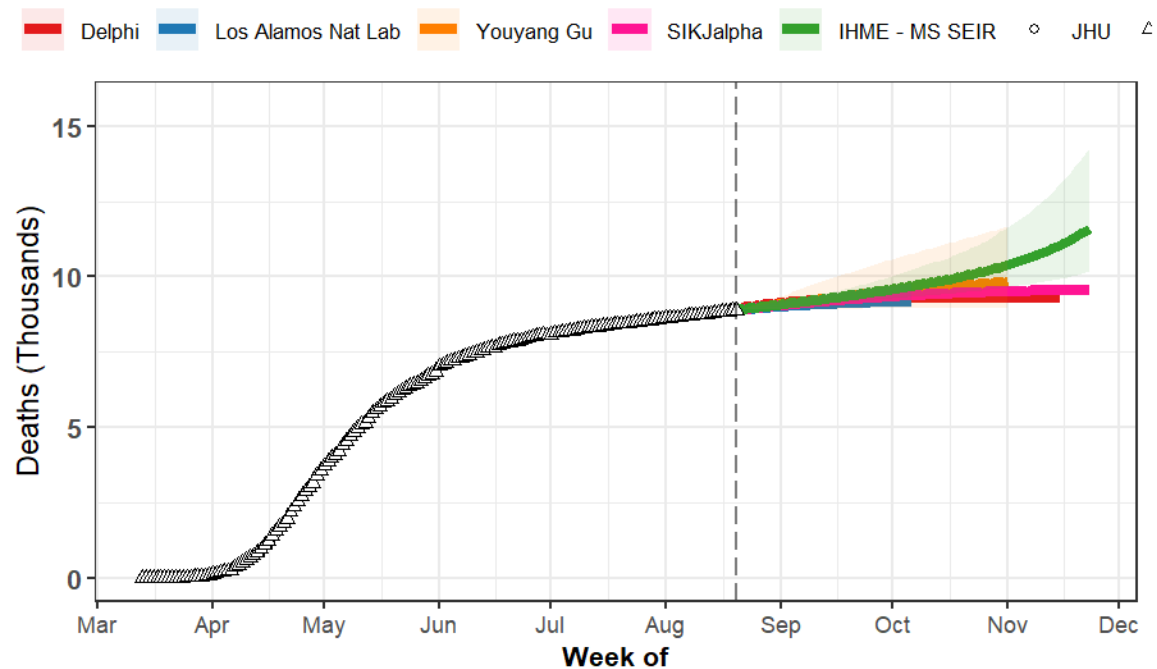

## Cumulative Out-Of-Sample Error (Post Intercept Shift)

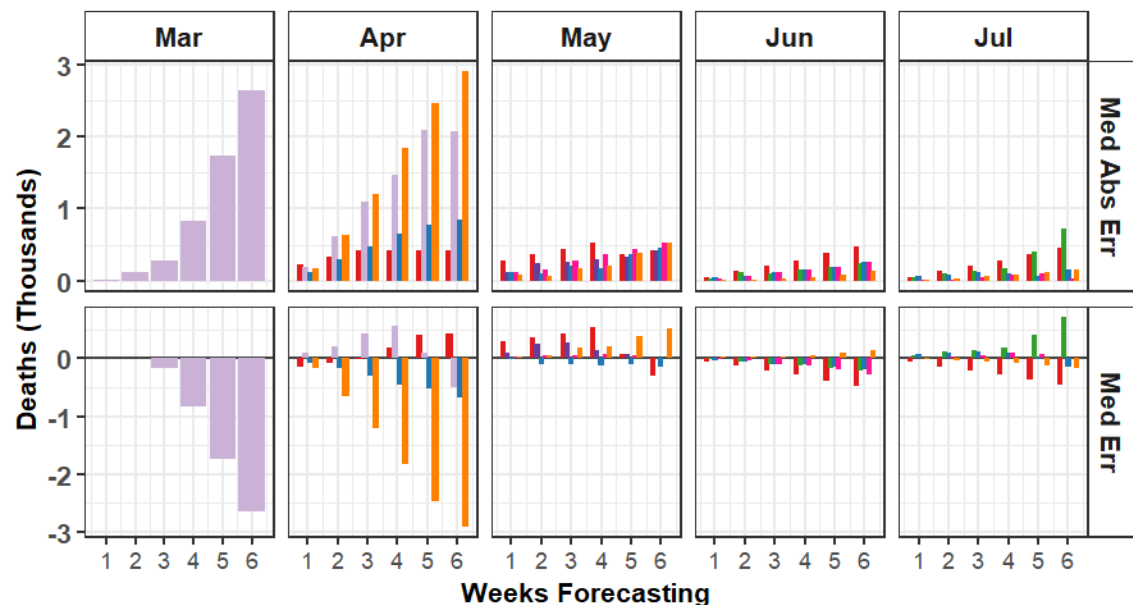

## All Model Versions

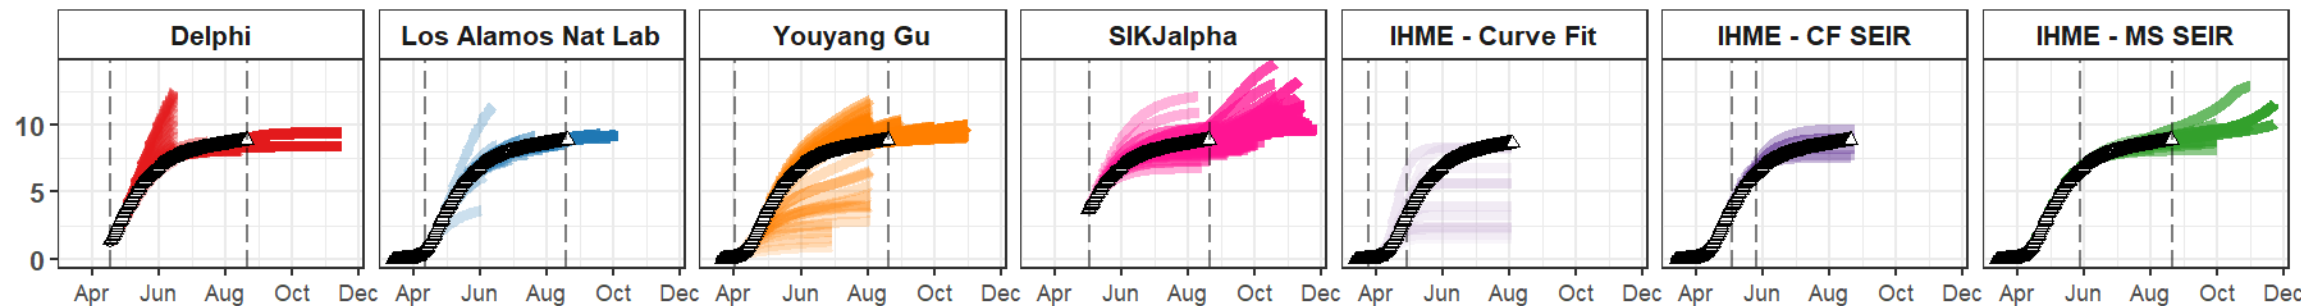

## All Cumulative Errors

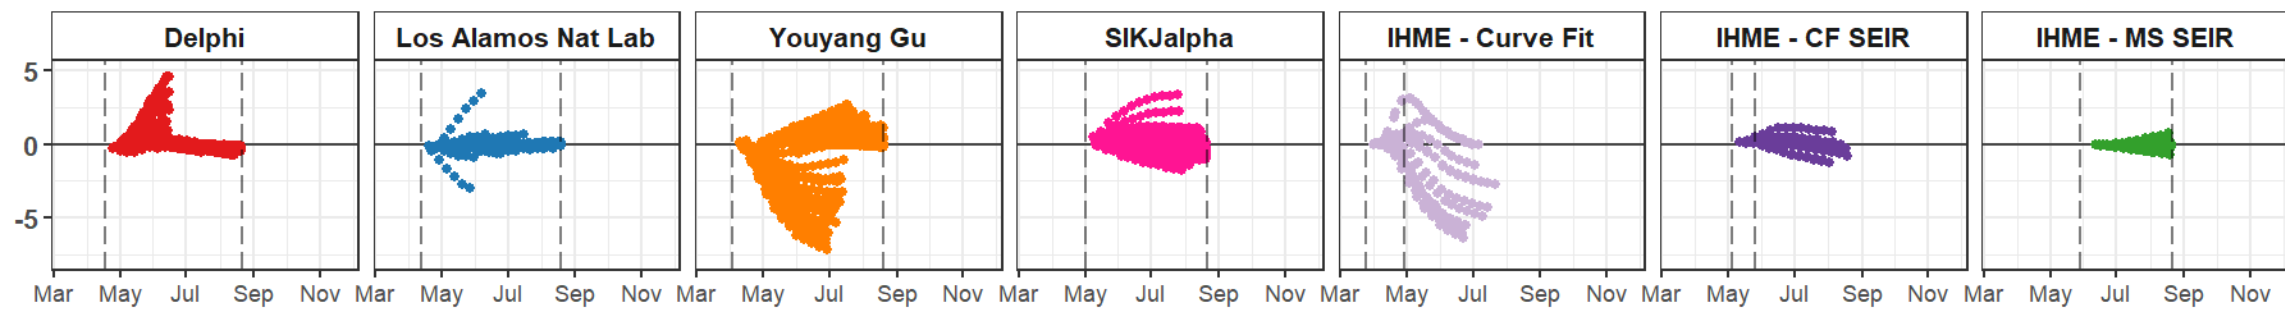

# Illinois

## Current Forecast

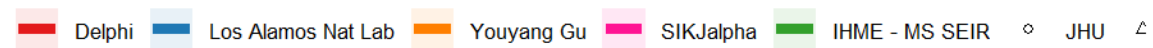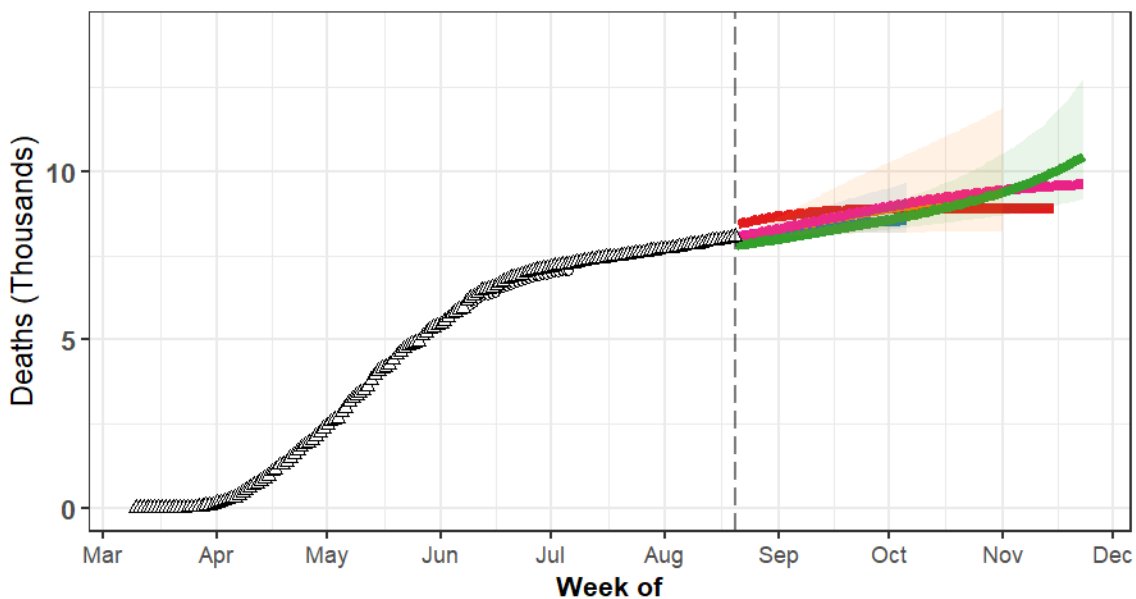

## Cumulative Out-Of-Sample Error (Post Intercept Shift)

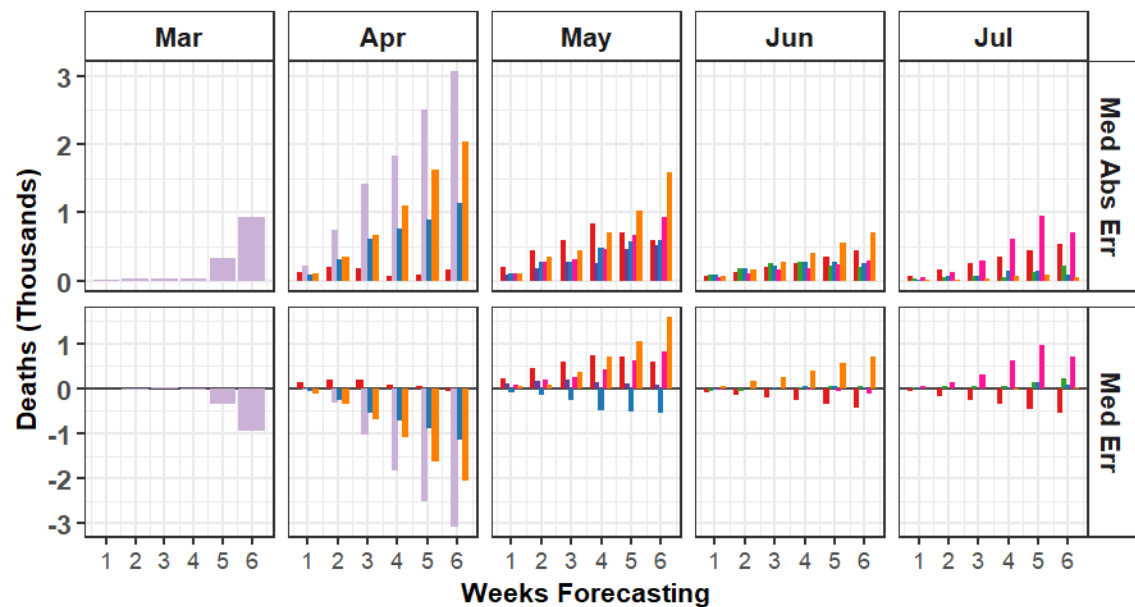

## All Model Versions

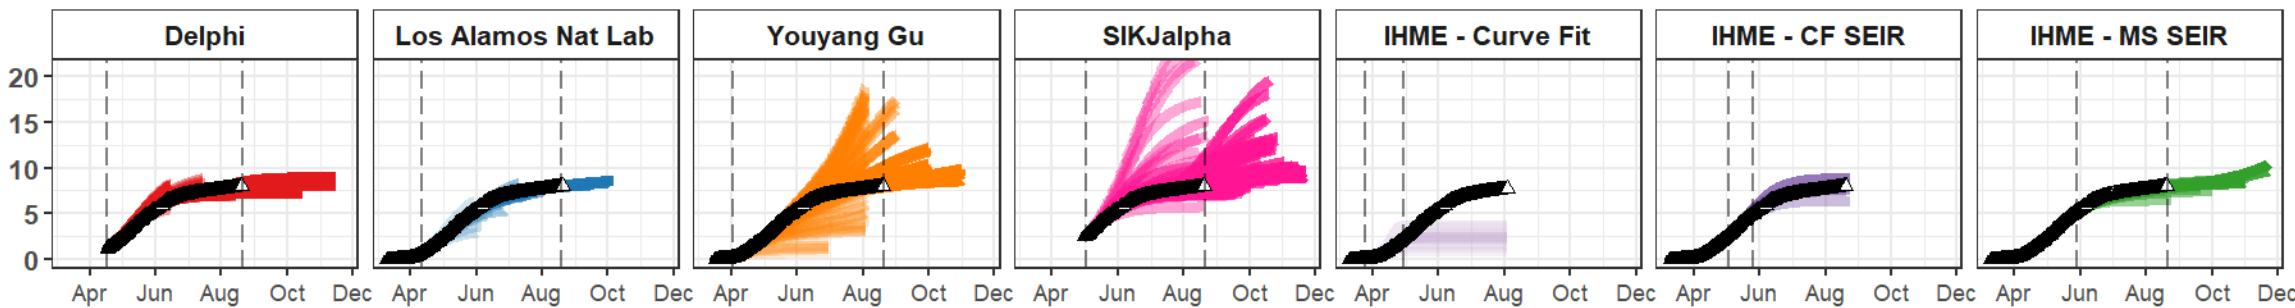

## All Cumulative Errors

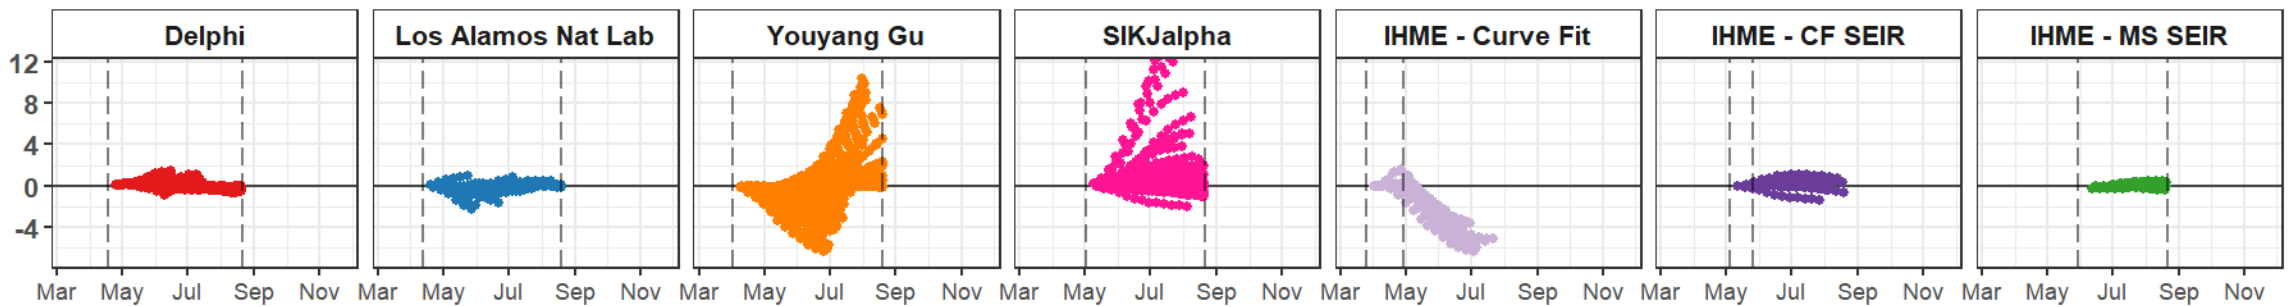

# Pennsylvania

## Current Forecast

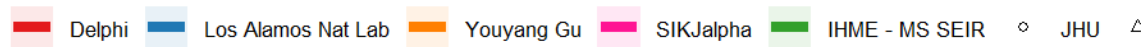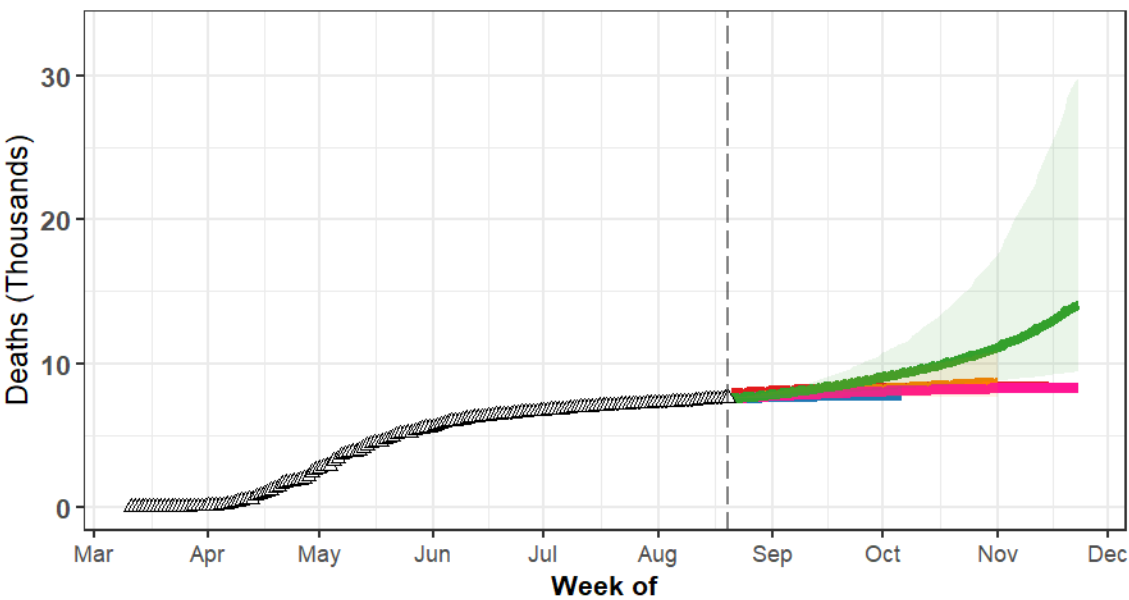

## Cumulative Out-Of-Sample Error (Post Intercept Shift)

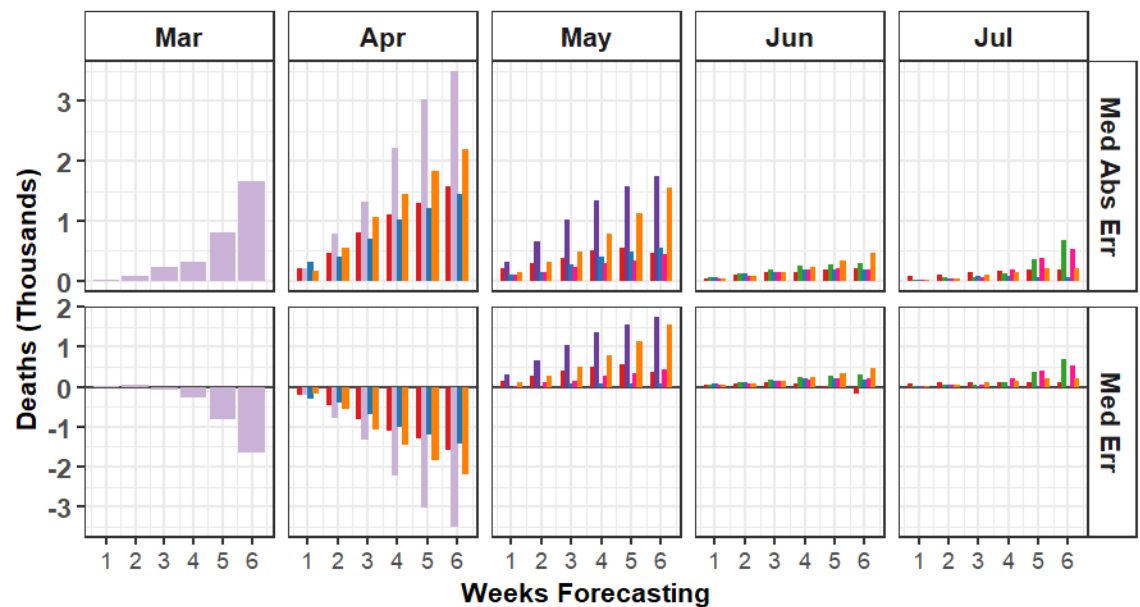

## All Model Versions

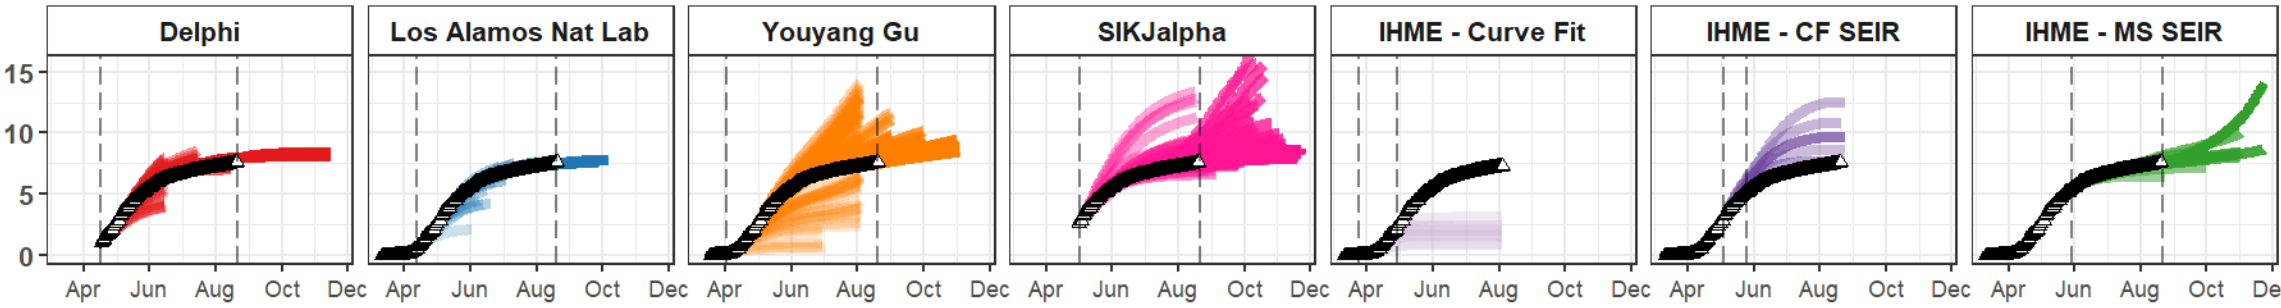

## All Cumulative Errors

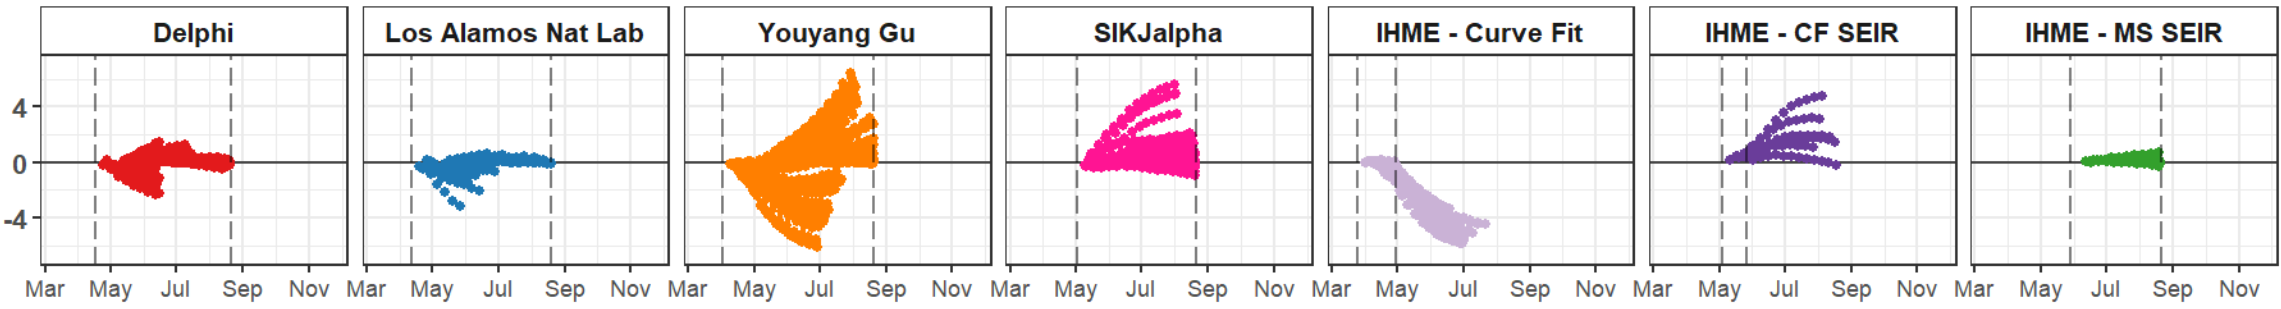



# Michigan

## Current Forecast

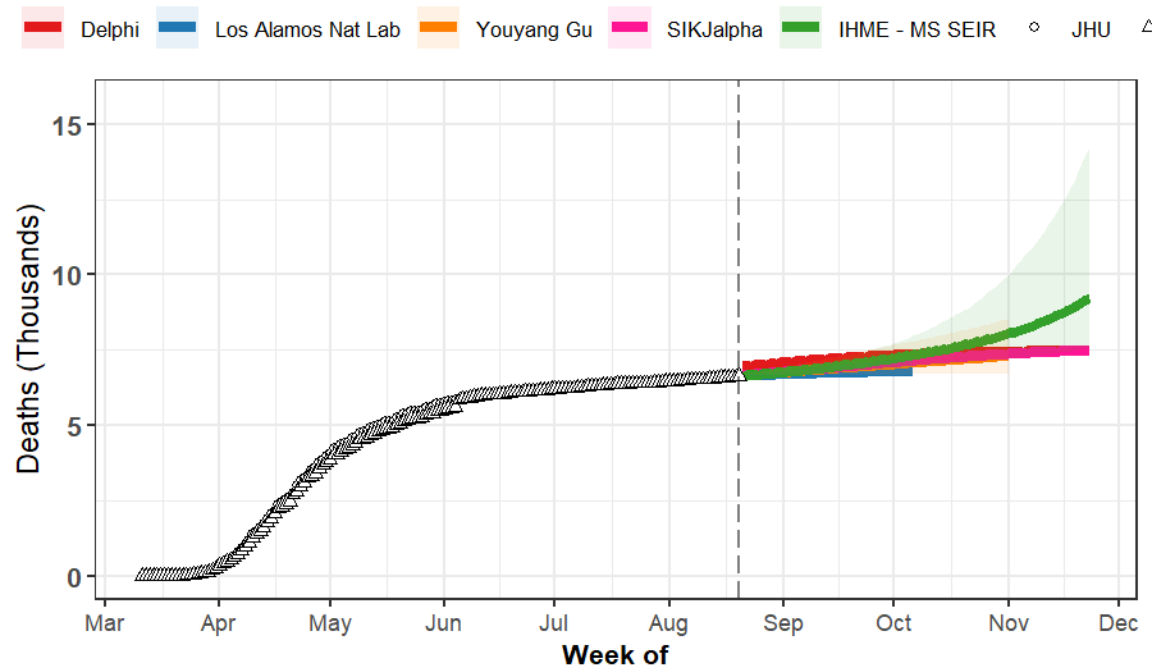

## Cumulative Out-Of-Sample Error (Post Intercept Shift)

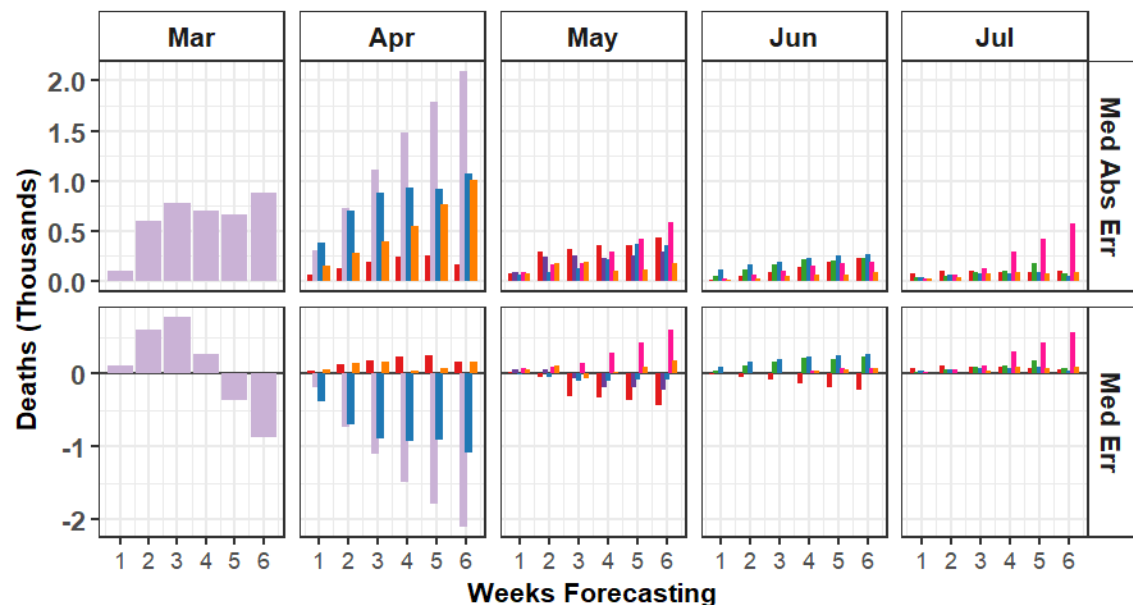

## All Model Versions

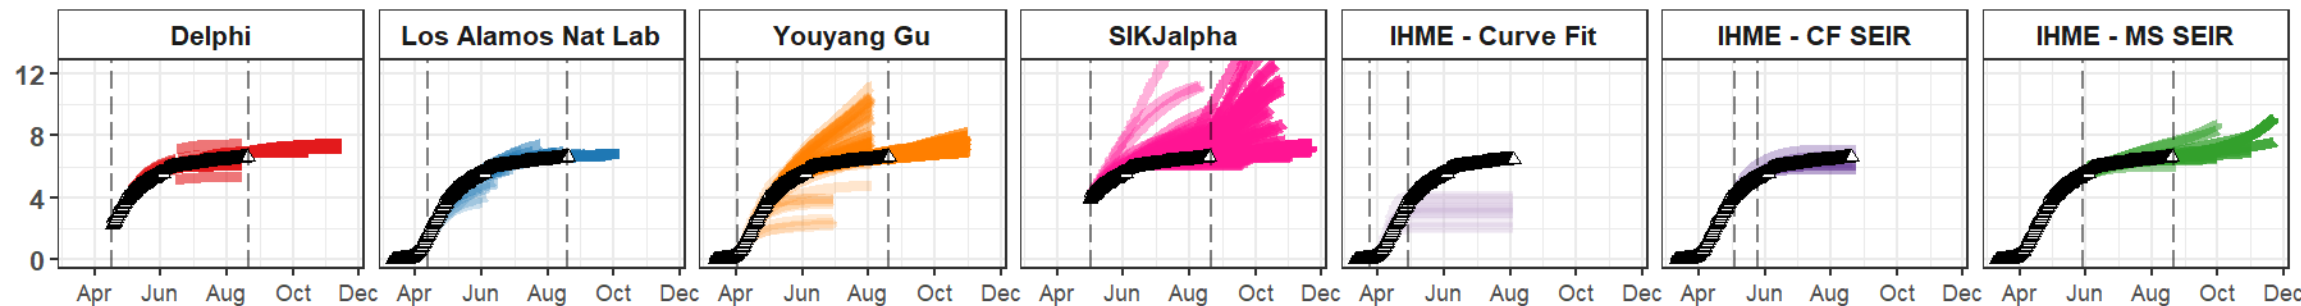

## All Cumulative Errors

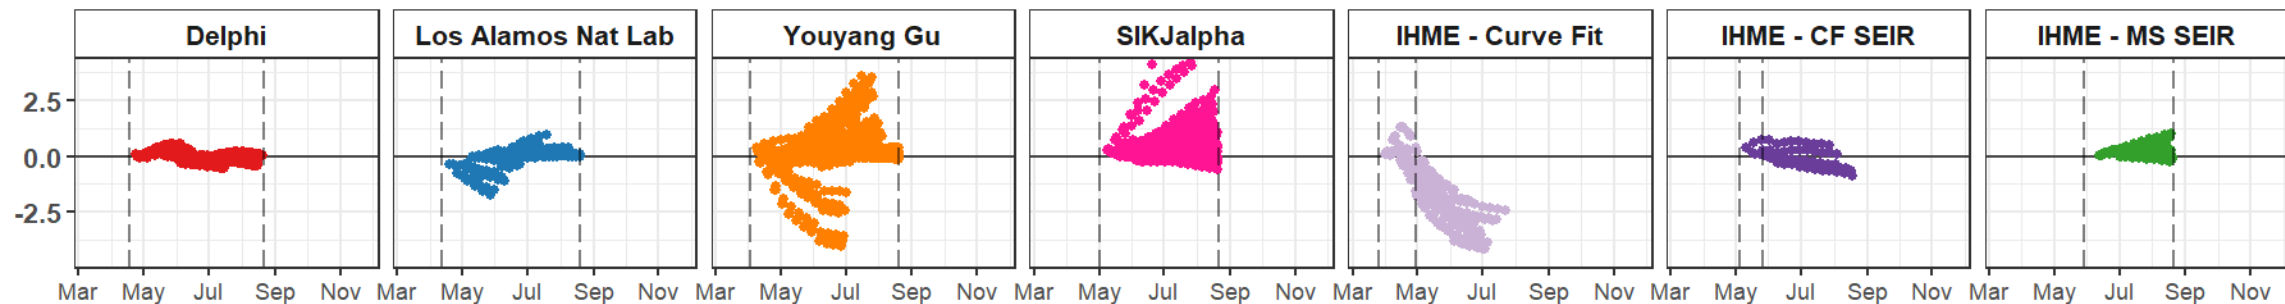

# Argentina

## Current Forecast

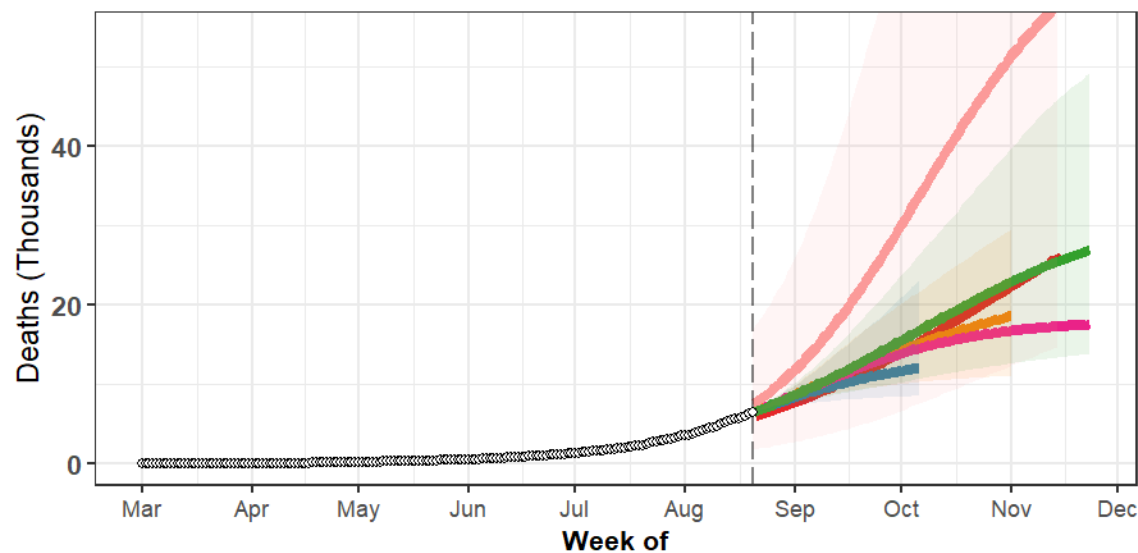

## Cumulative Out-Of-Sample Error (Post Intercept Shift)

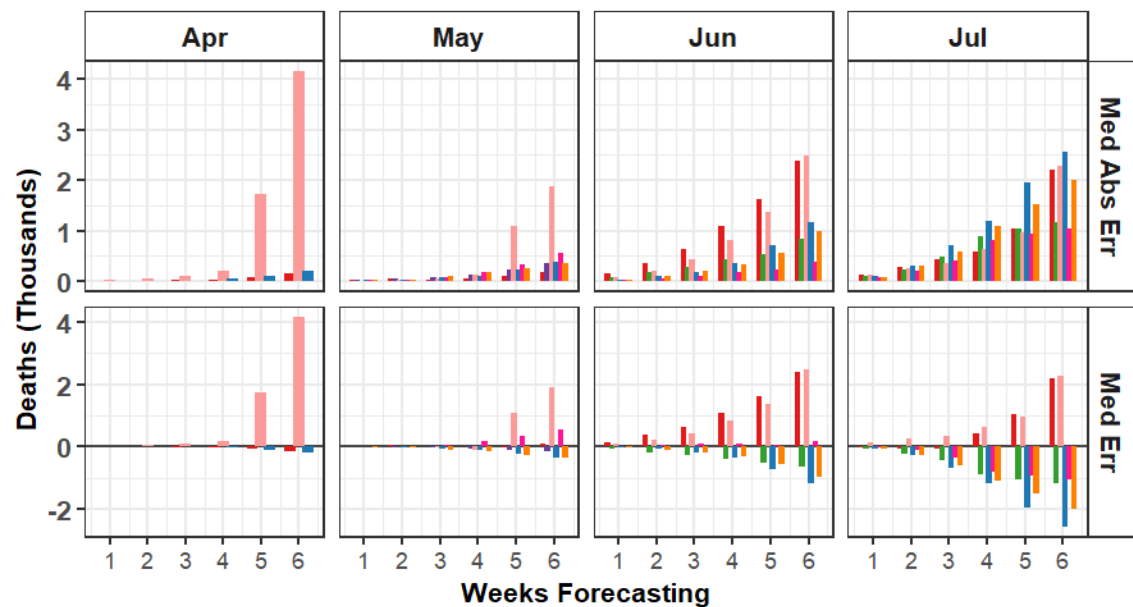

## All Model Versions

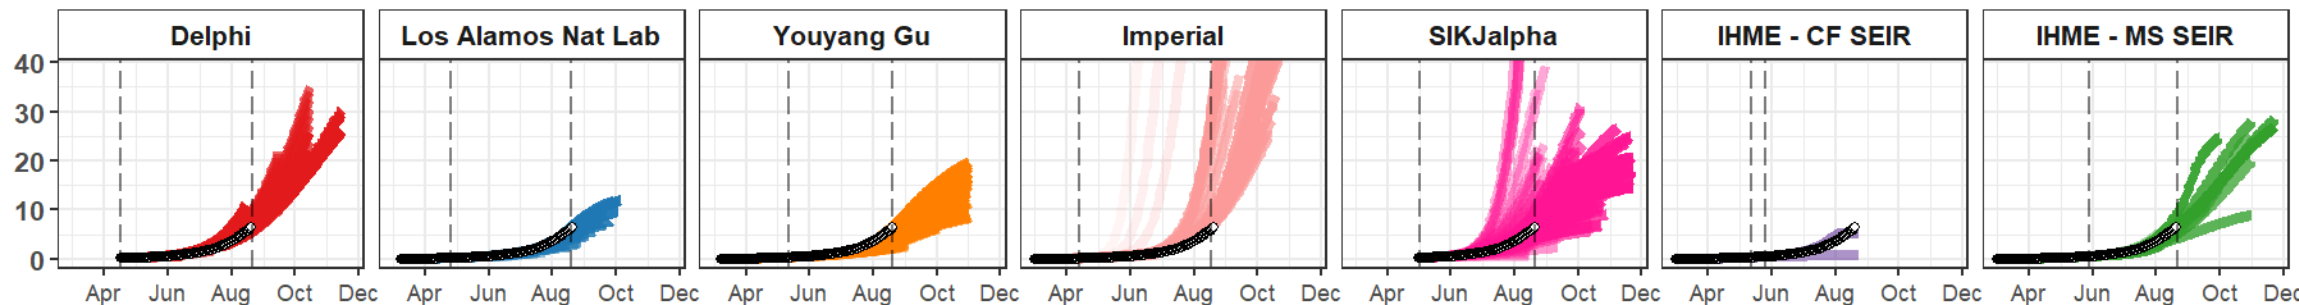

## All Cumulative Errors

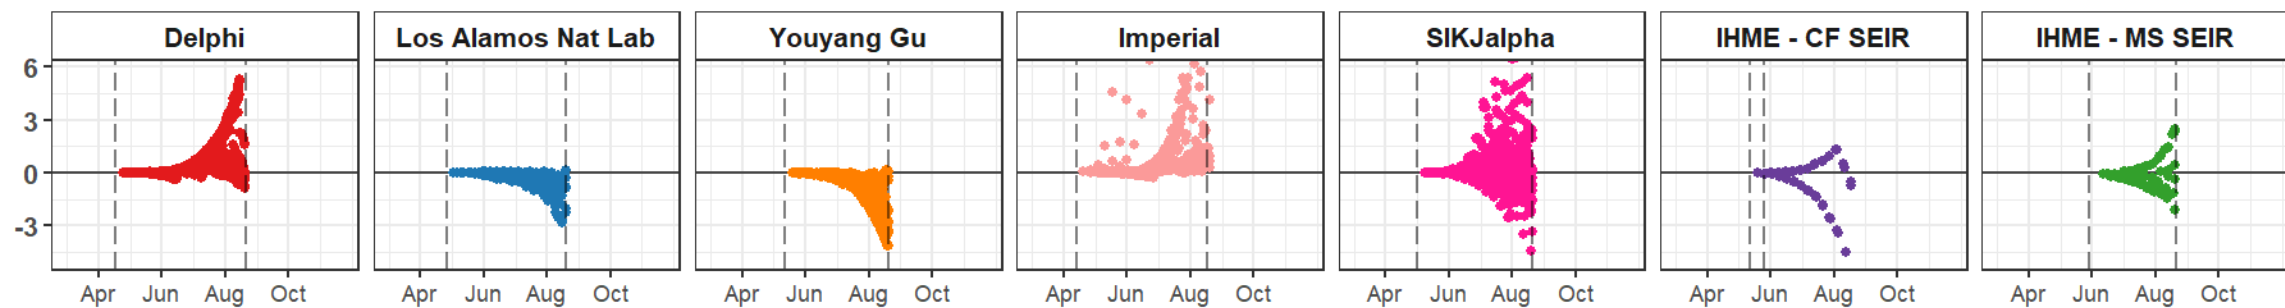

# Indonesia

## Current Forecast

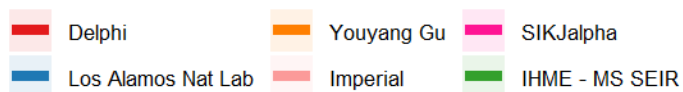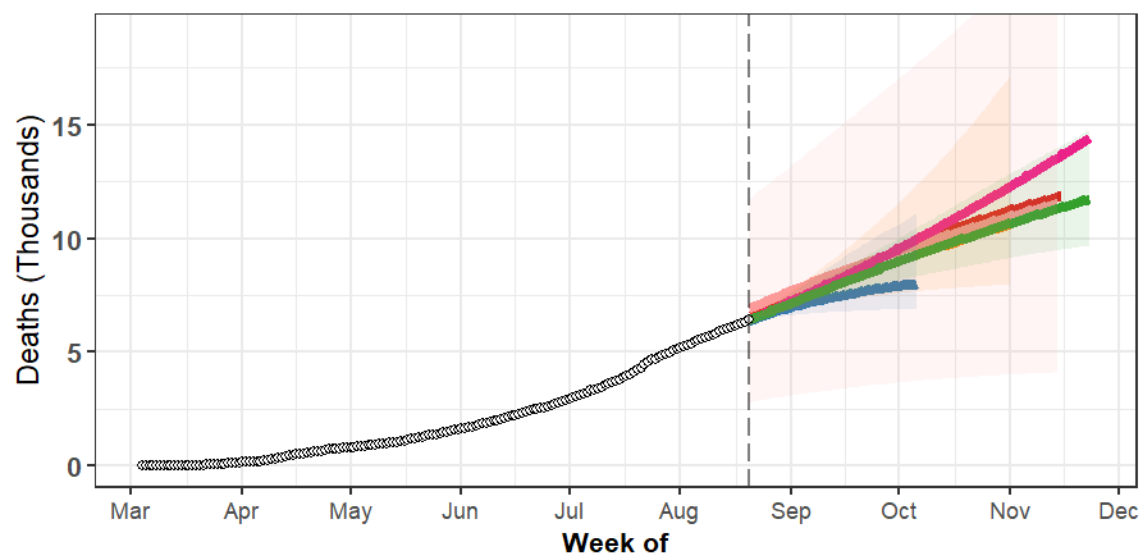

## Cumulative Out-Of-Sample Error (Post Intercept Shift)

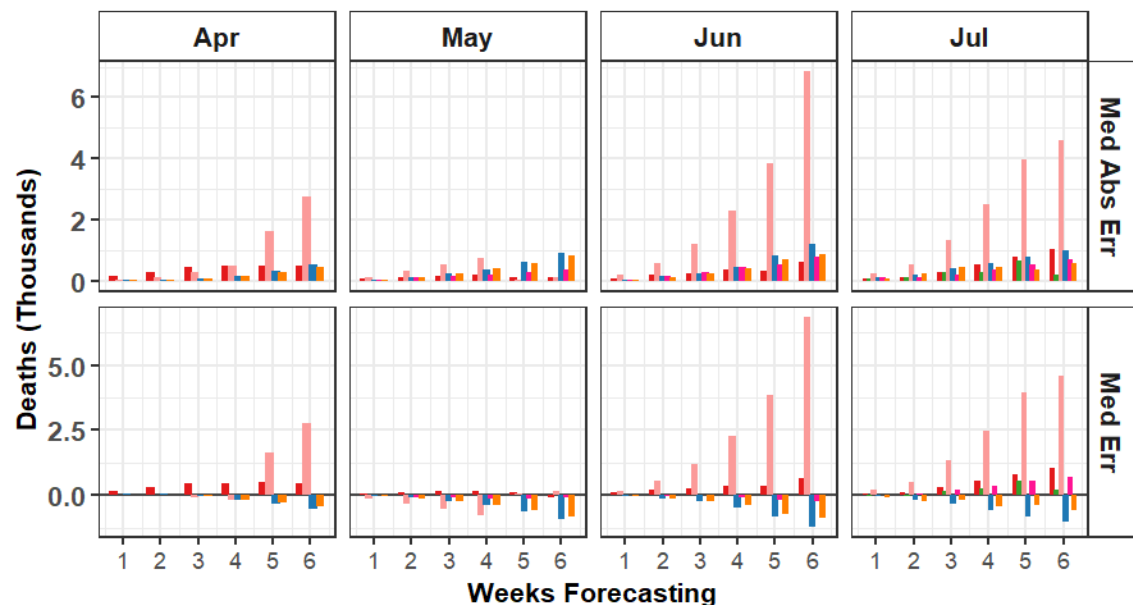

## All Model Versions

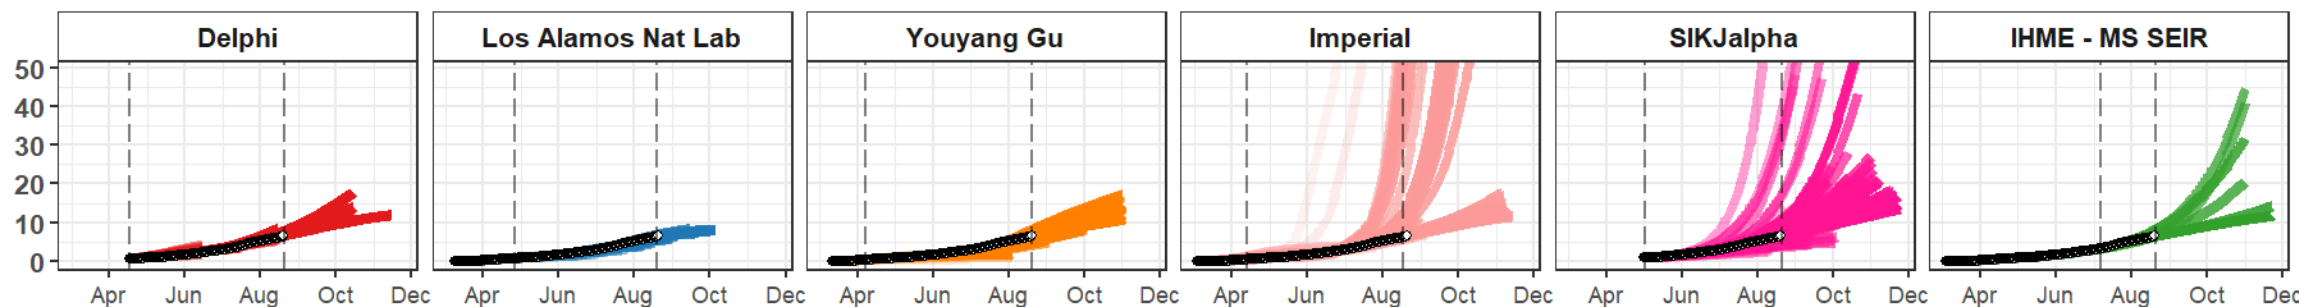

## All Cumulative Errors

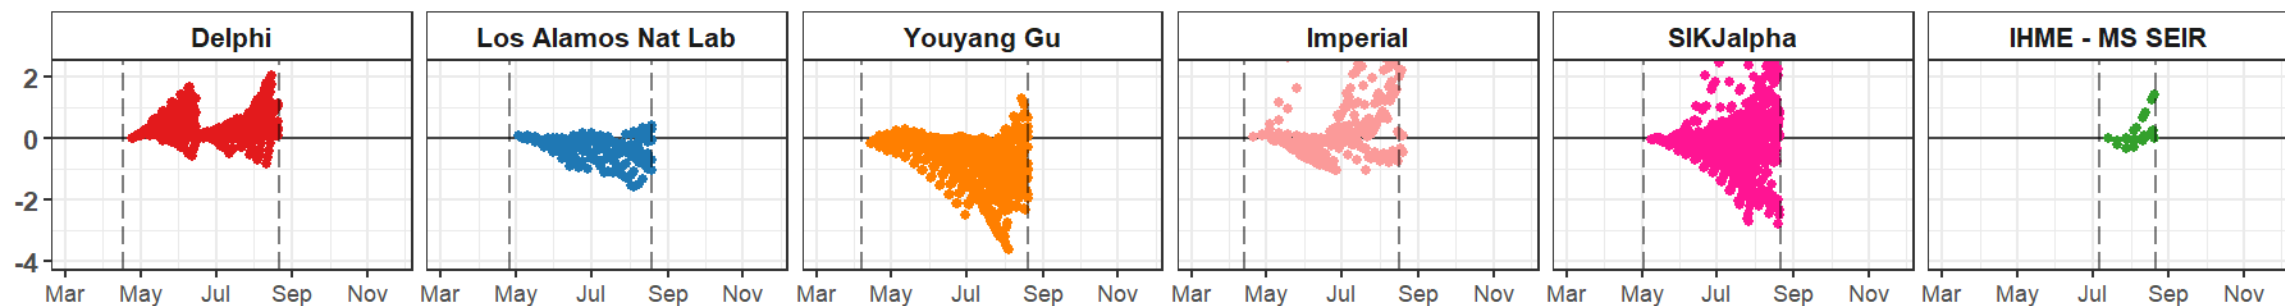

# Pakistan

## Current Forecast

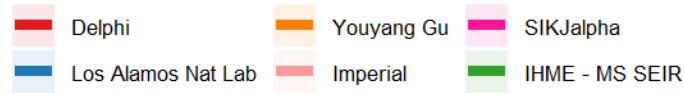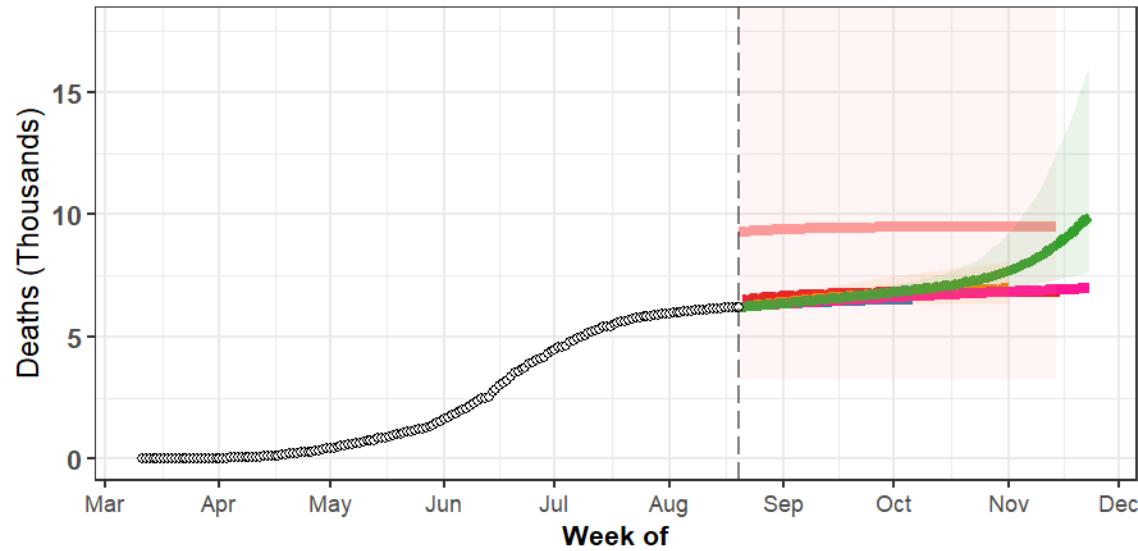

## Cumulative Out-Of-Sample Error (Post Intercept Shift)

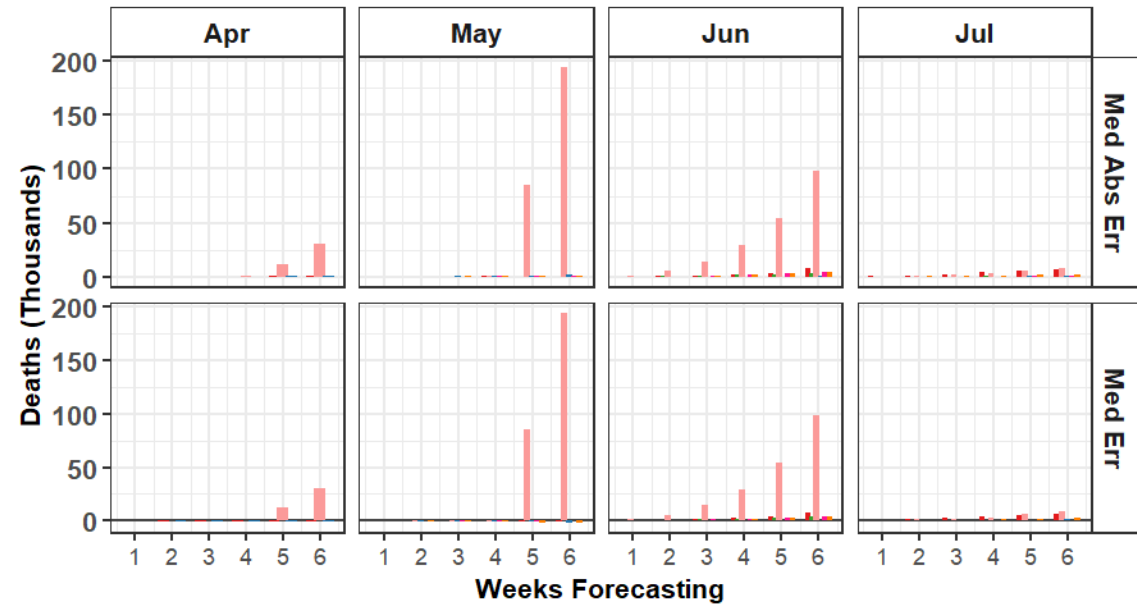

## All Model Versions

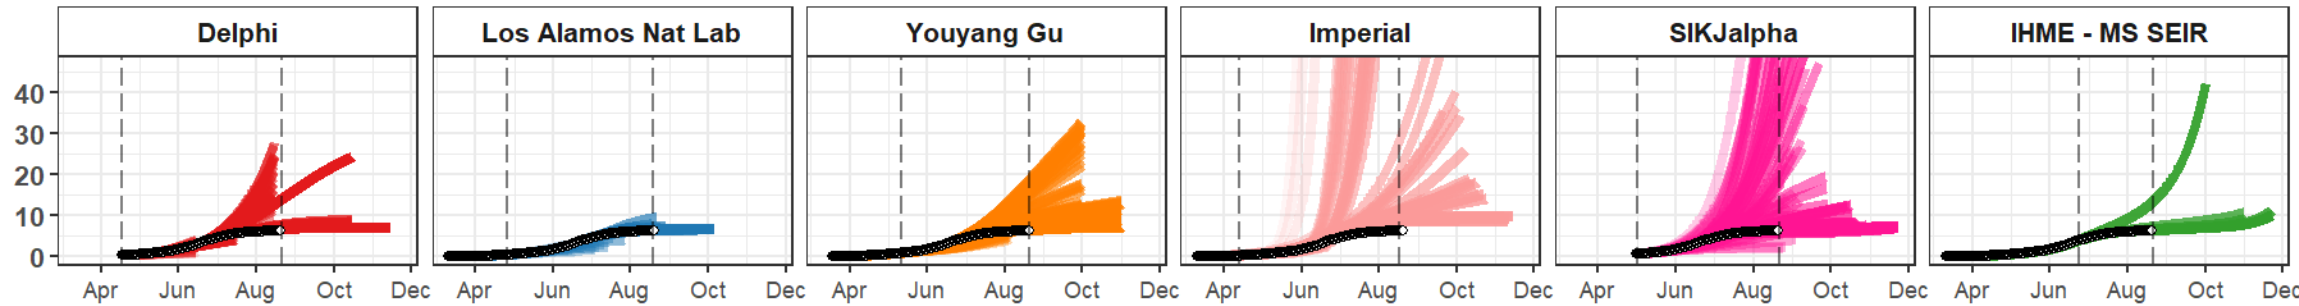

## All Cumulative Errors

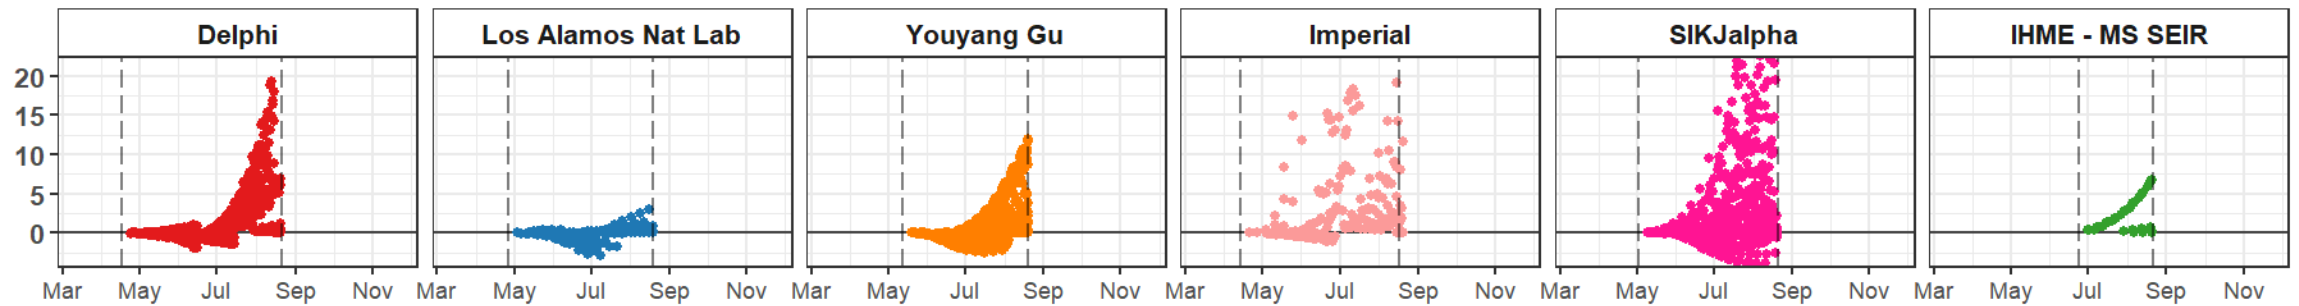

# Iraq

## Current Forecast

Delphi Los Alamos Nat Lab Imperial SIKJalpha IHME - MS SEIR

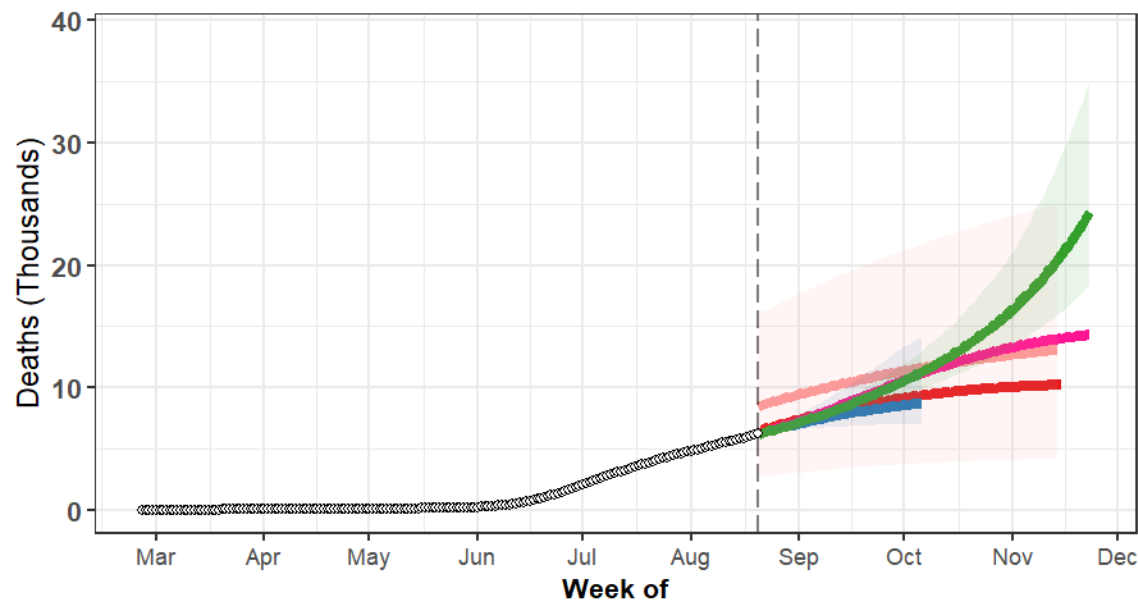

## Cumulative Out-Of-Sample Error (Post Intercept Shift)

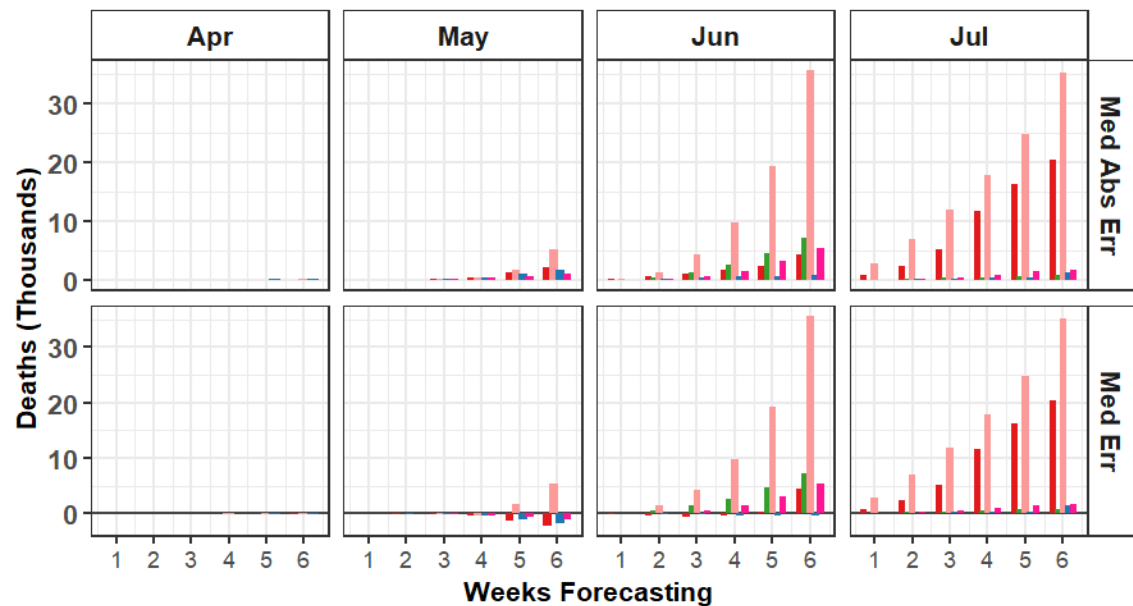

## All Model Versions

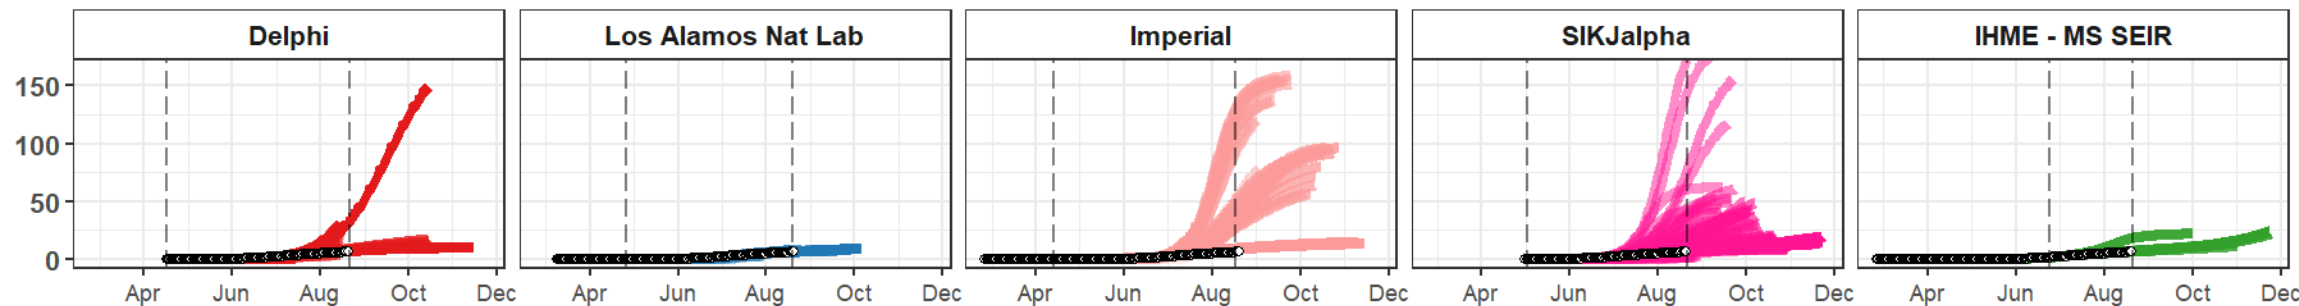

## All Cumulative Errors

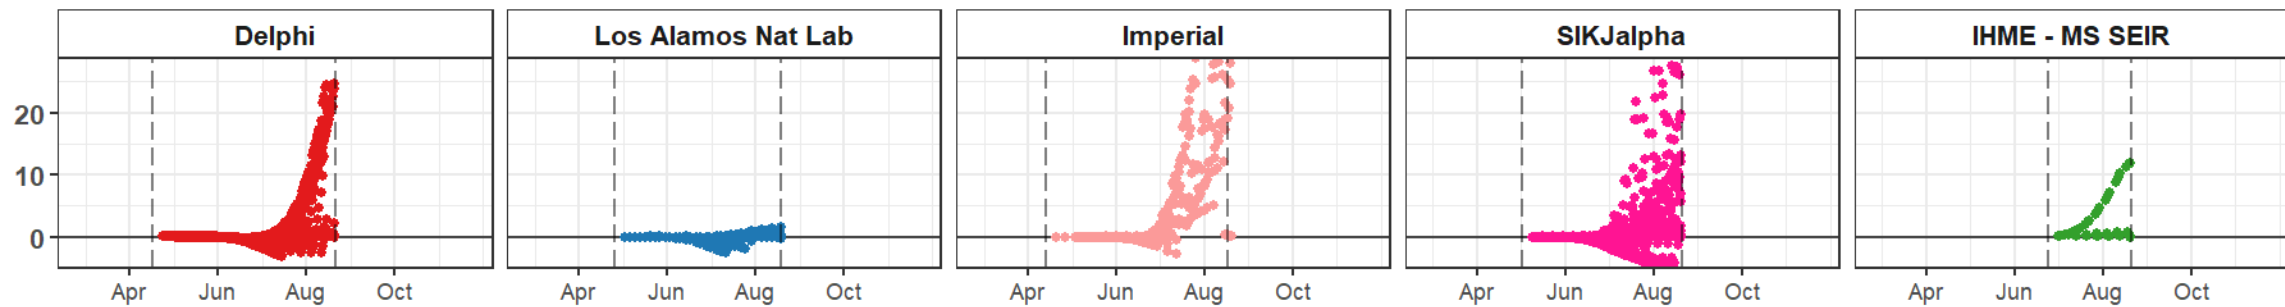

# Netherlands

## Current Forecast

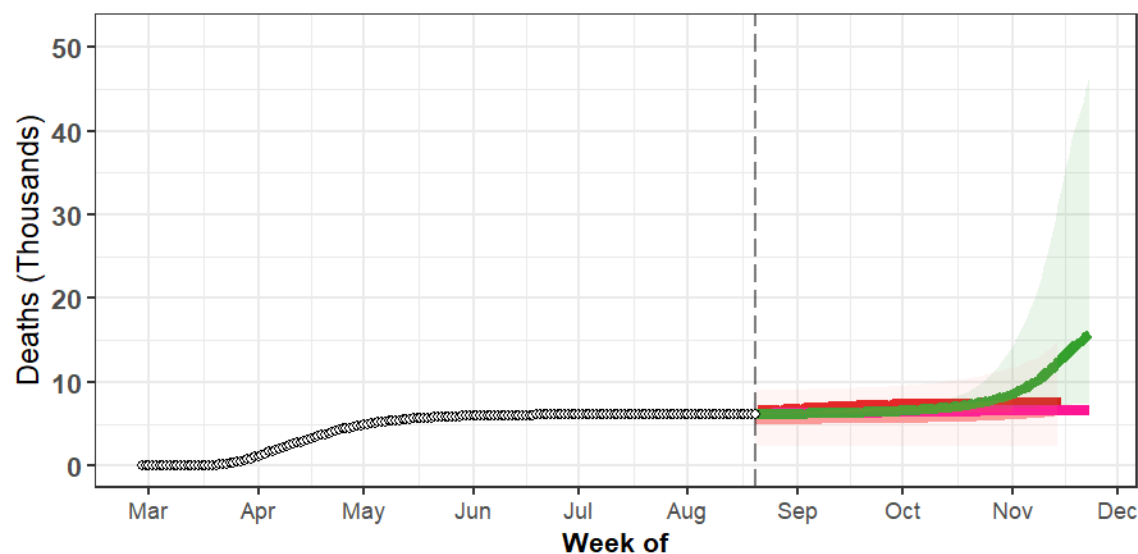

## Cumulative Out-Of-Sample Error (Post Intercept Shift)

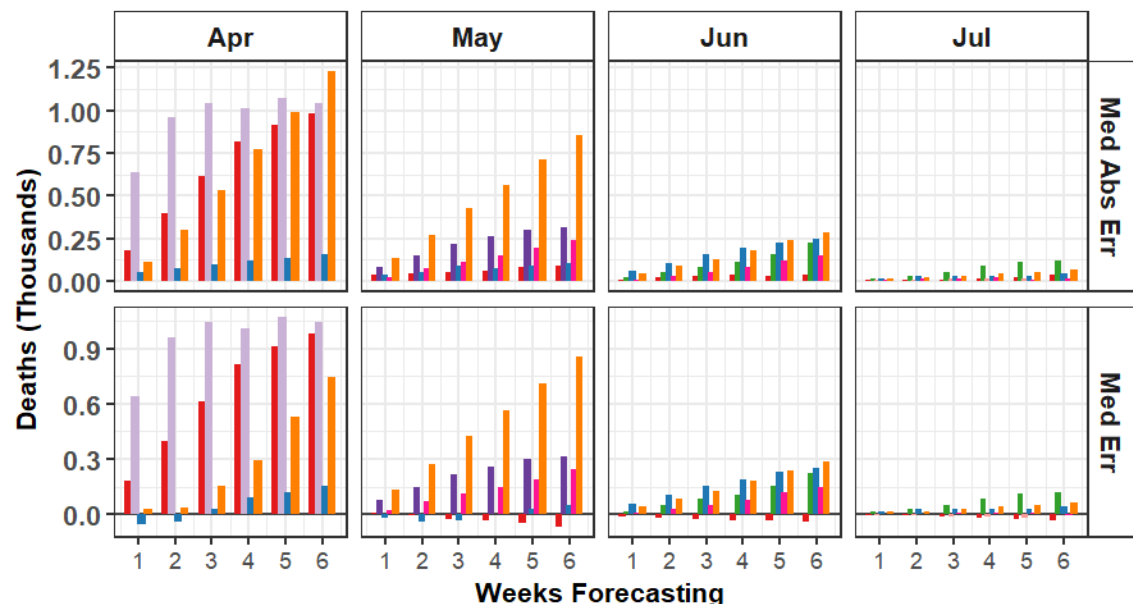

## All Model Versions

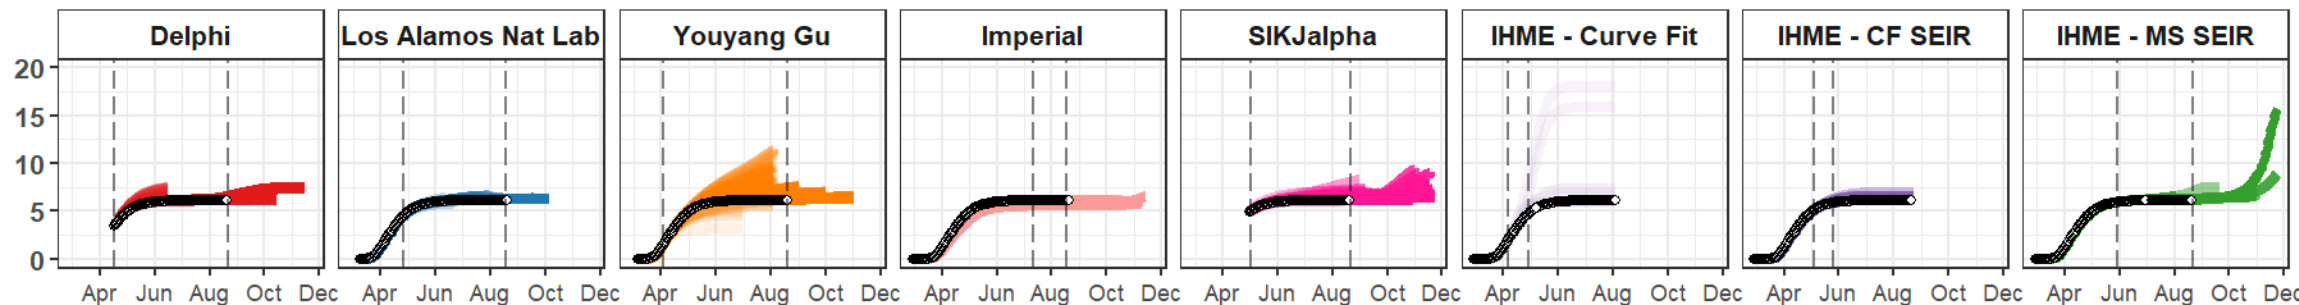

## All Cumulative Errors

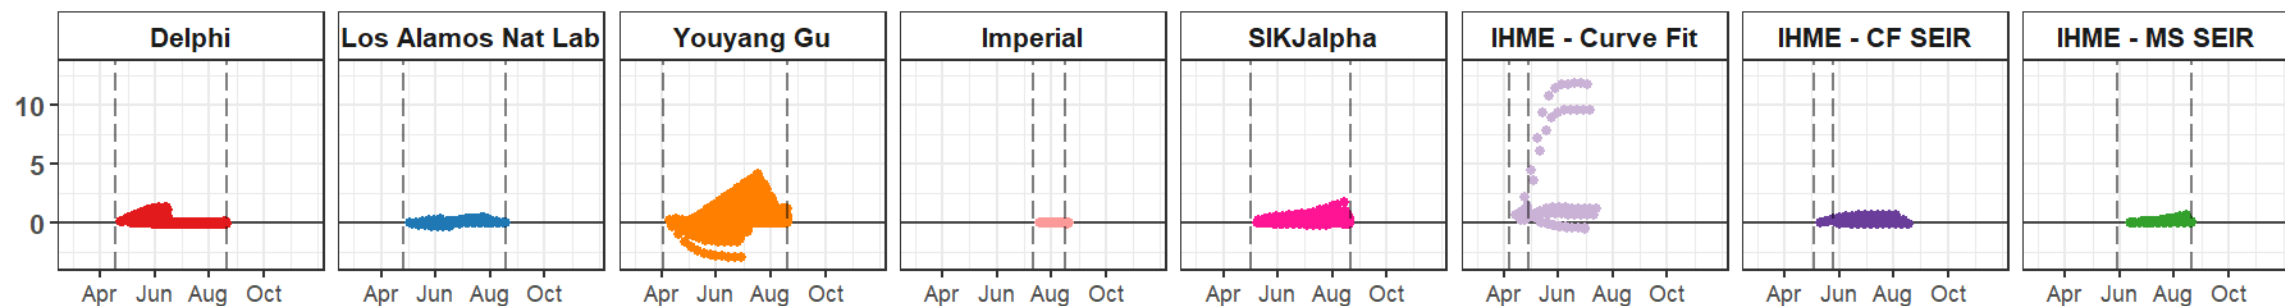

# Turkey

## Current Forecast

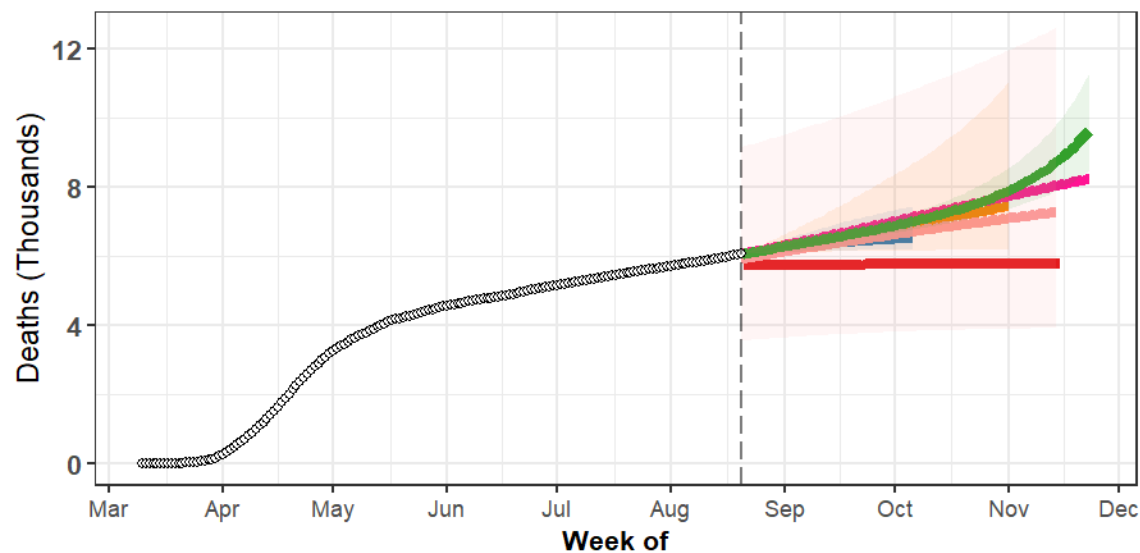

## Cumulative Out-Of-Sample Error (Post Intercept Shift)

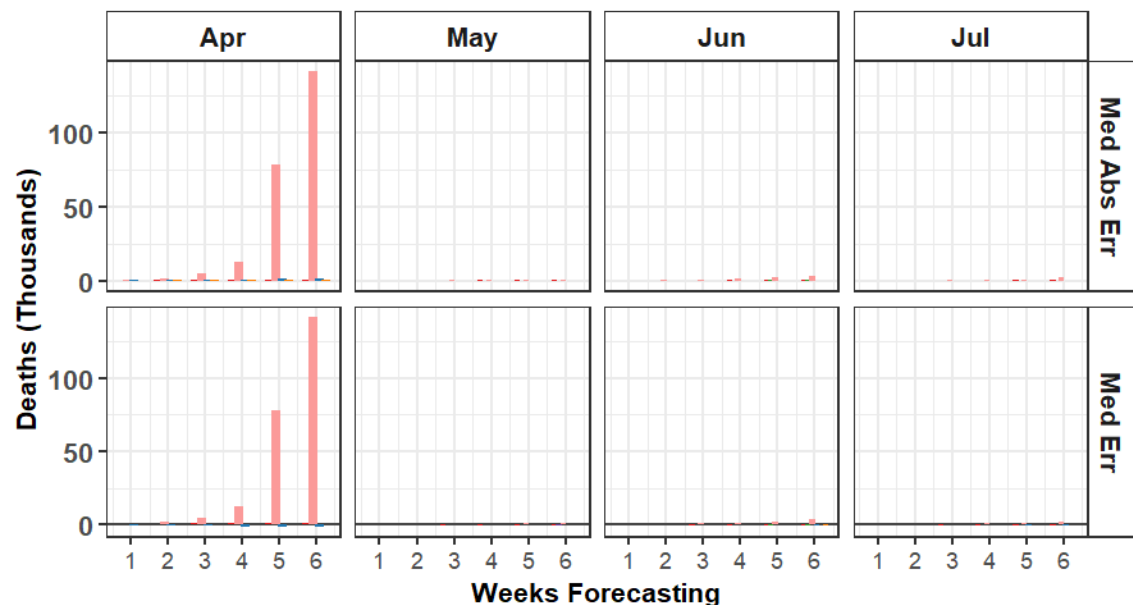

## All Model Versions

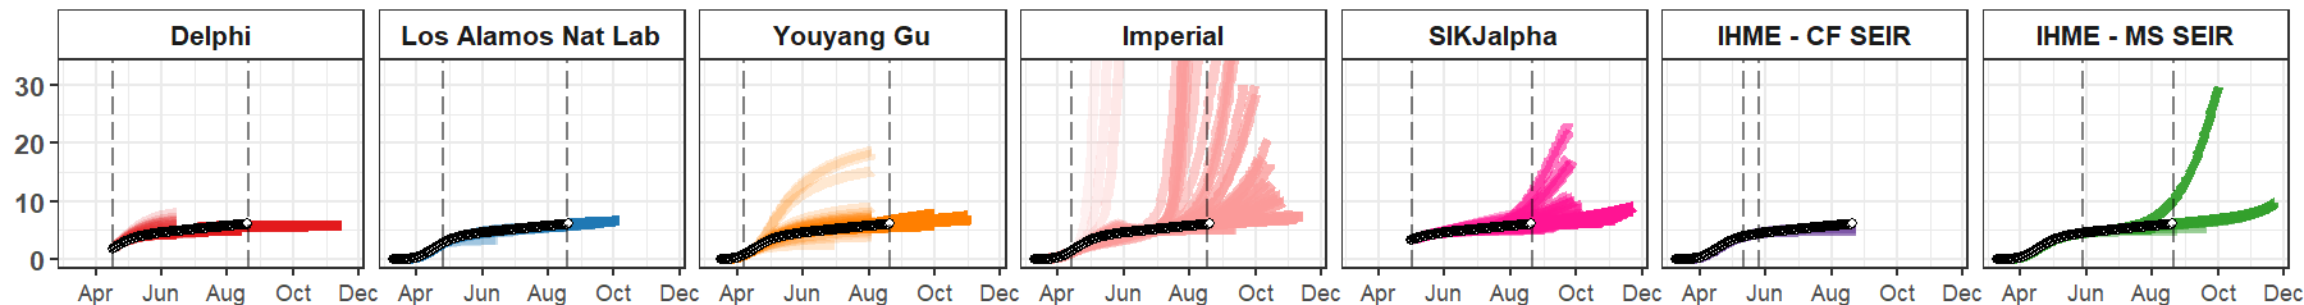

## All Cumulative Errors

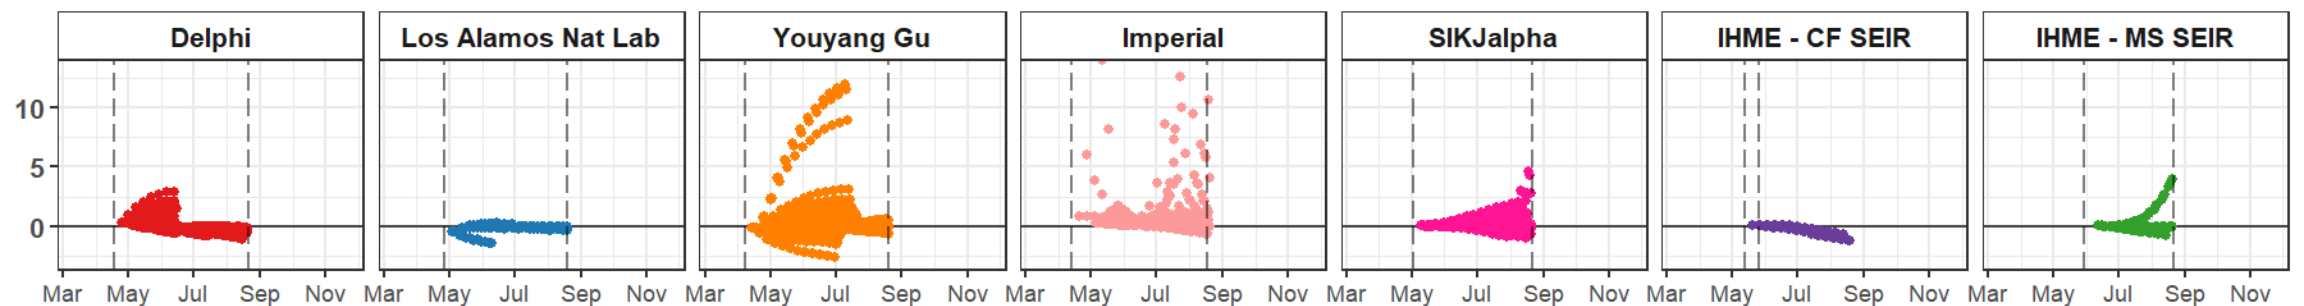

# Sweden

## Current Forecast

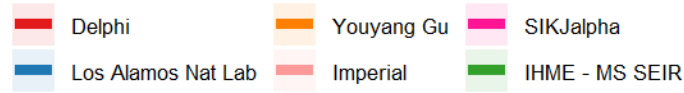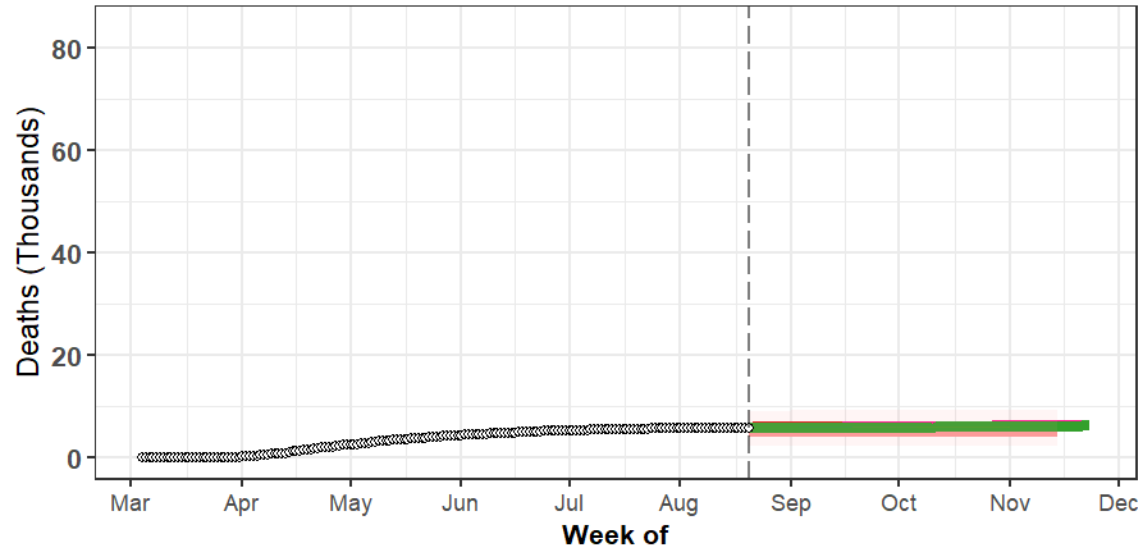

## Cumulative Out-Of-Sample Error (Post Intercept Shift)

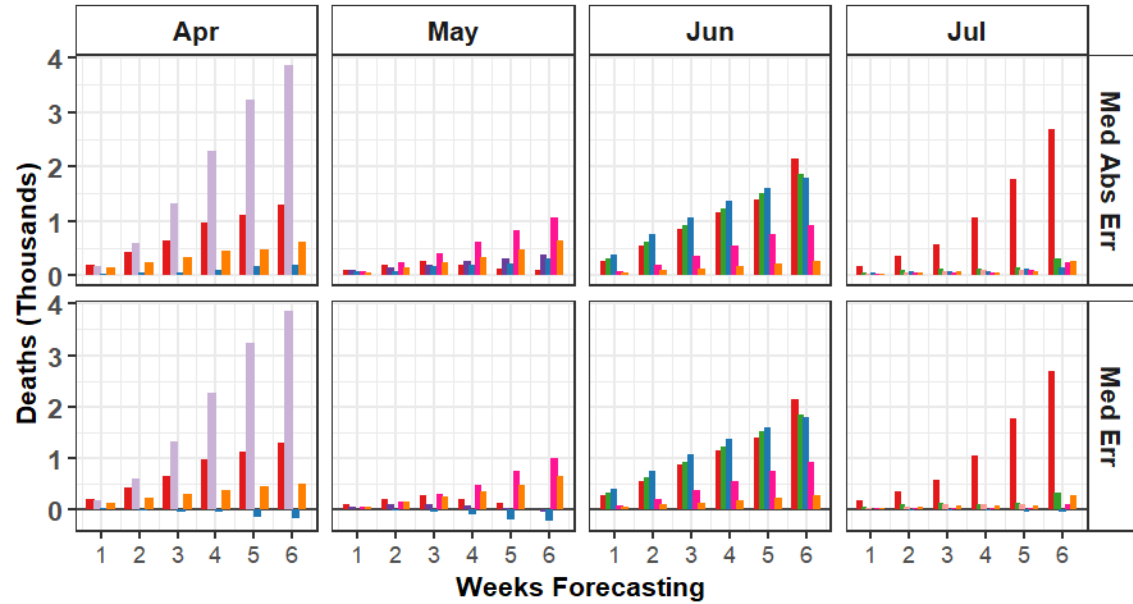

## All Model Versions

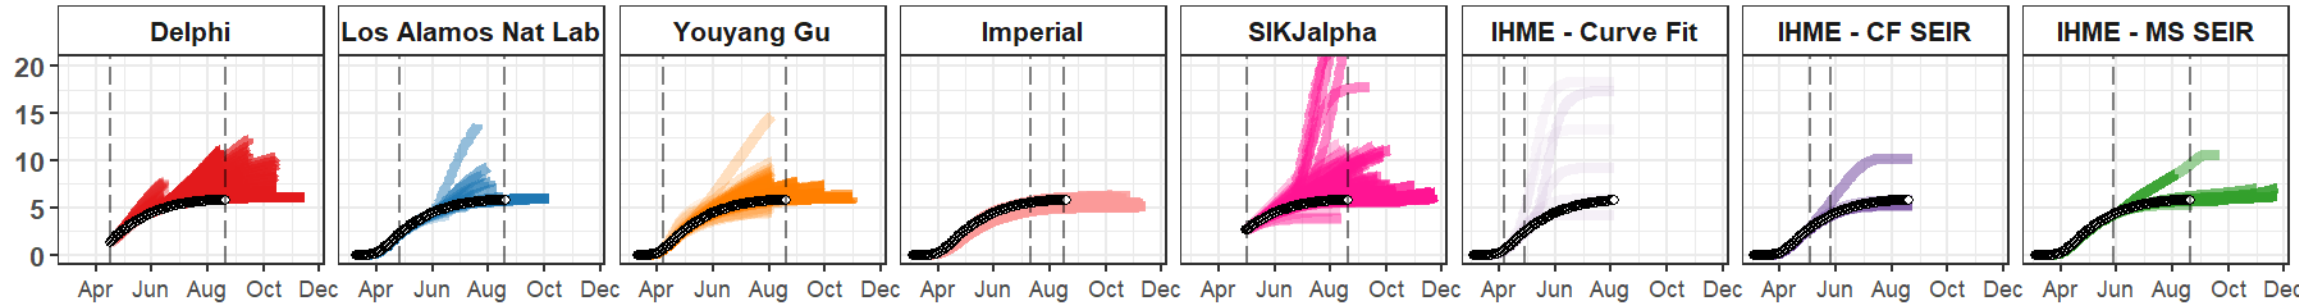

## All Cumulative Errors

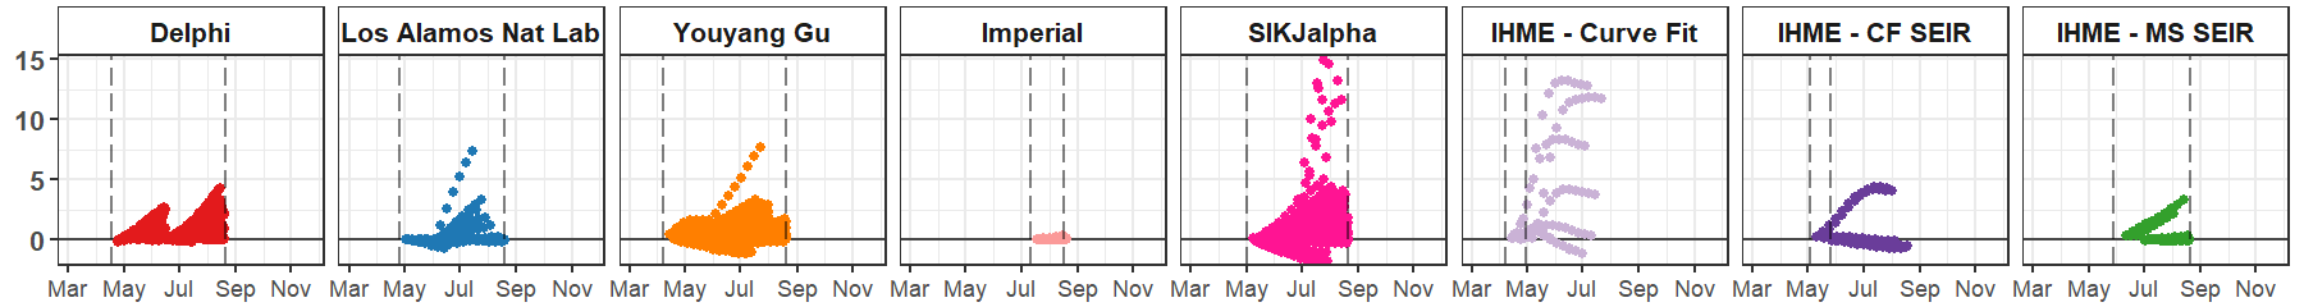



# Egypt

## Current Forecast

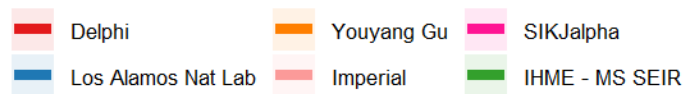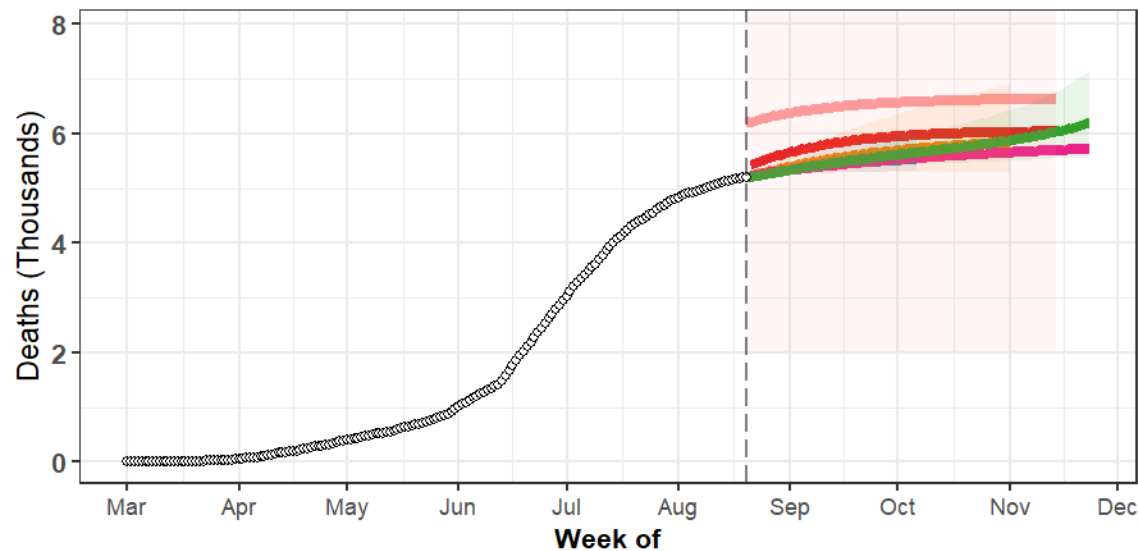

## Cumulative Out-Of-Sample Error (Post Intercept Shift)

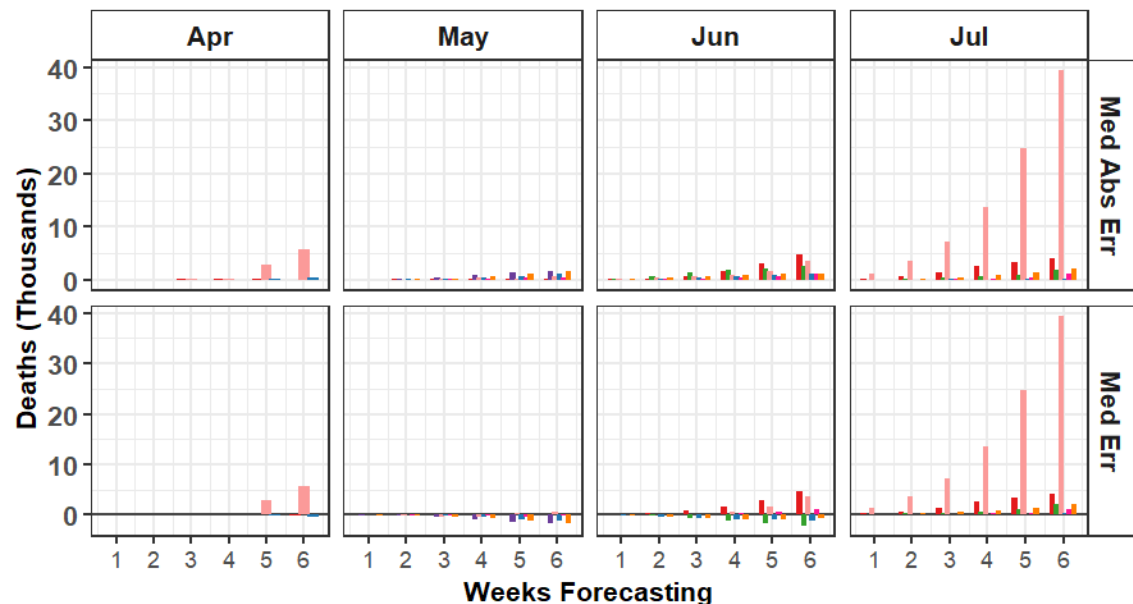

## All Model Versions

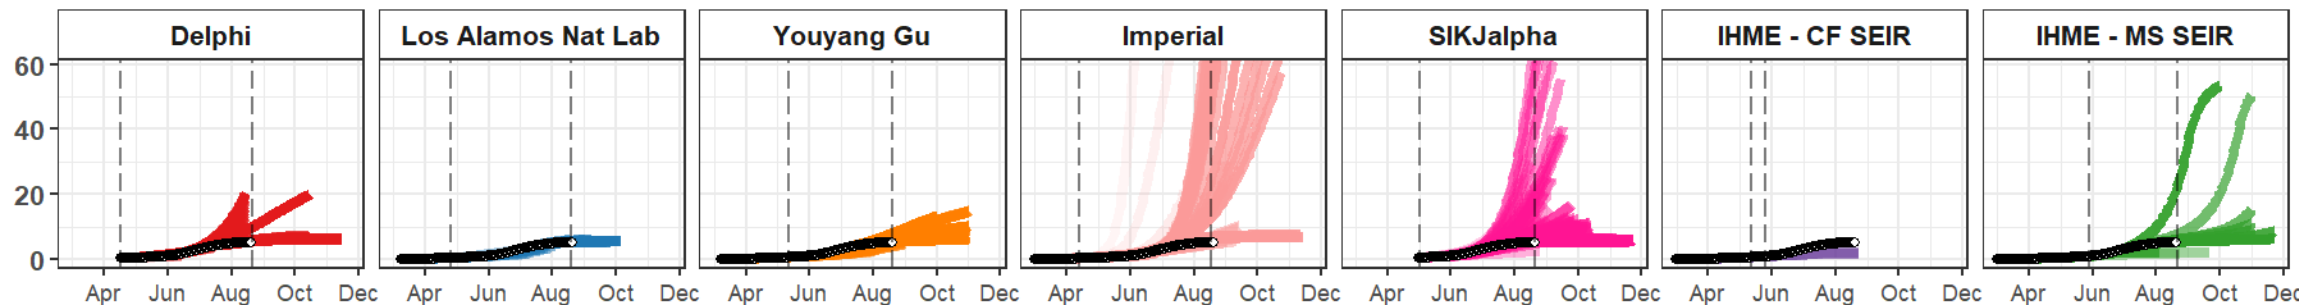

## All Cumulative Errors

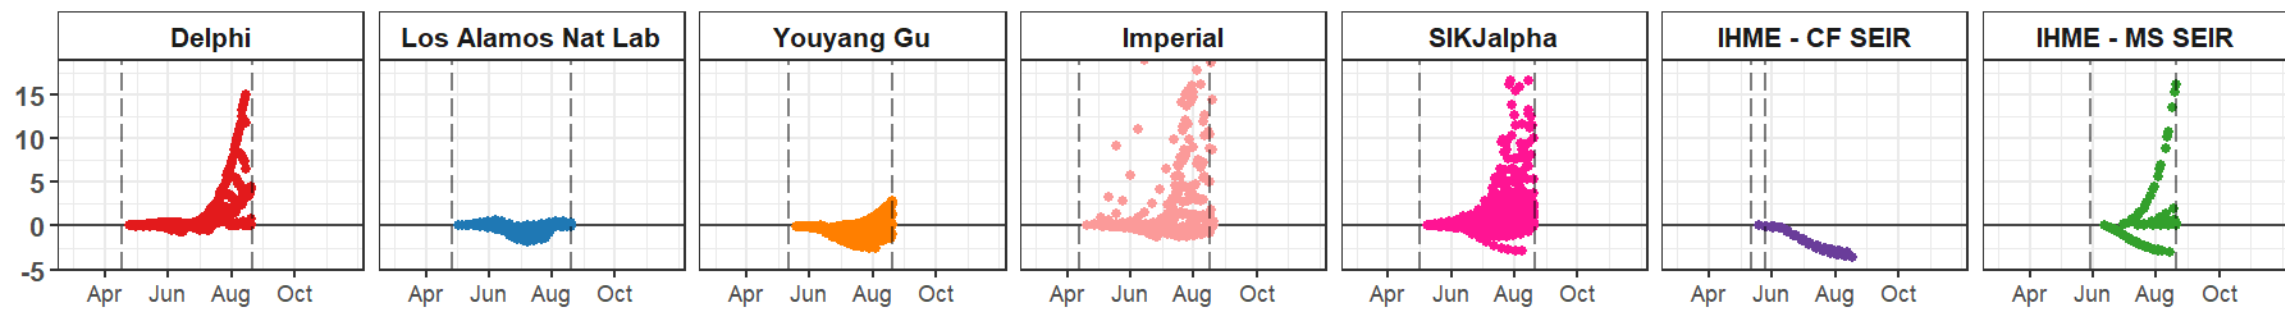

# Georgia

## Current Forecast

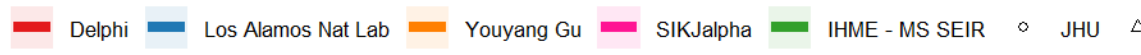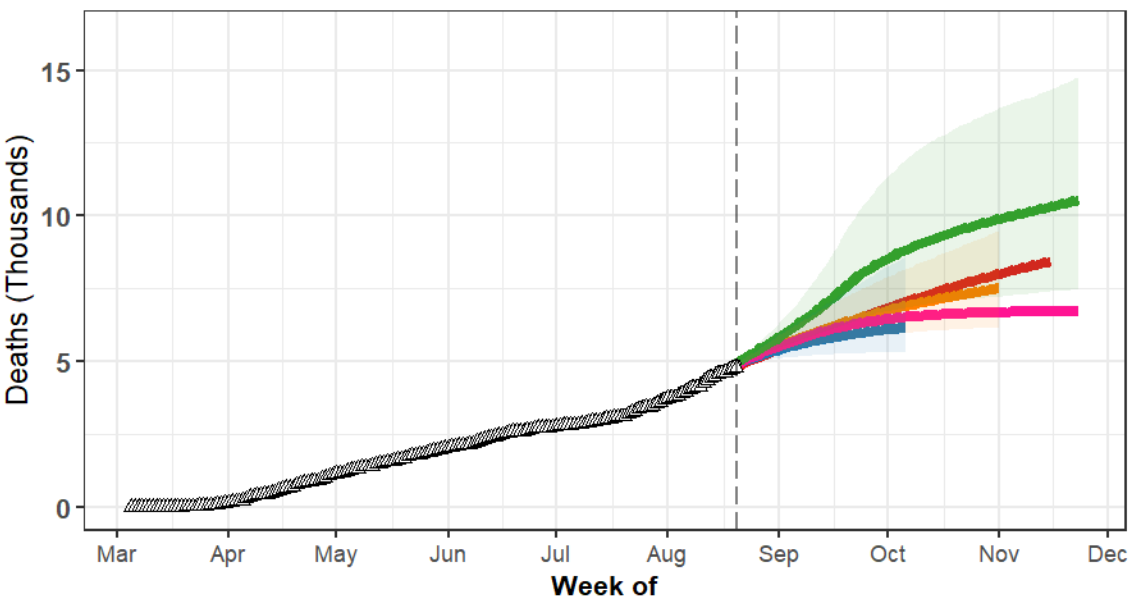

## Cumulative Out-Of-Sample Error (Post Intercept Shift)

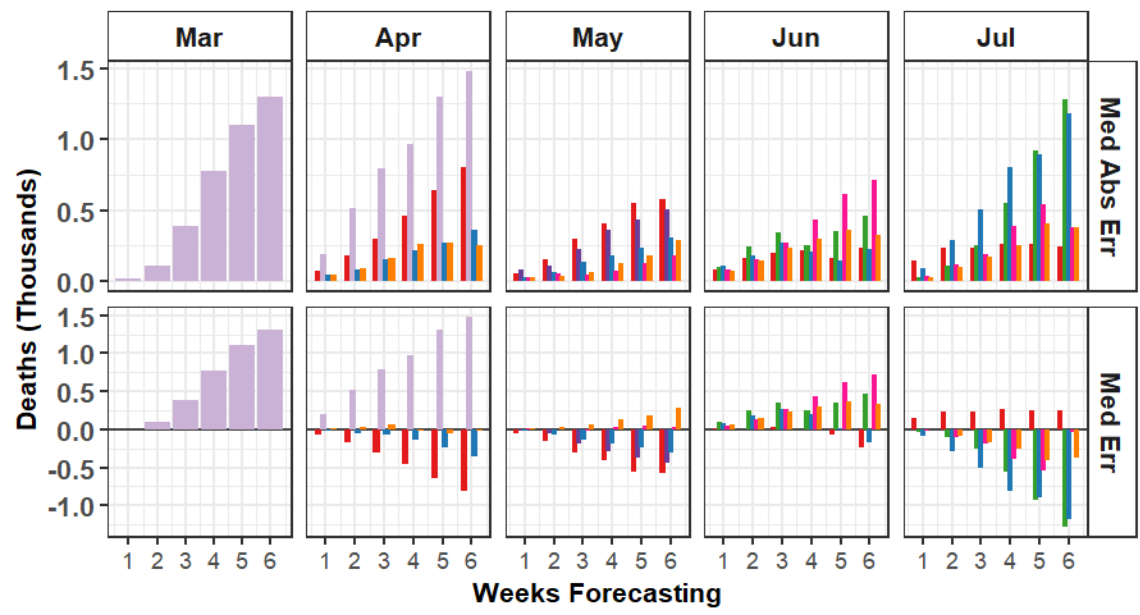

## All Model Versions

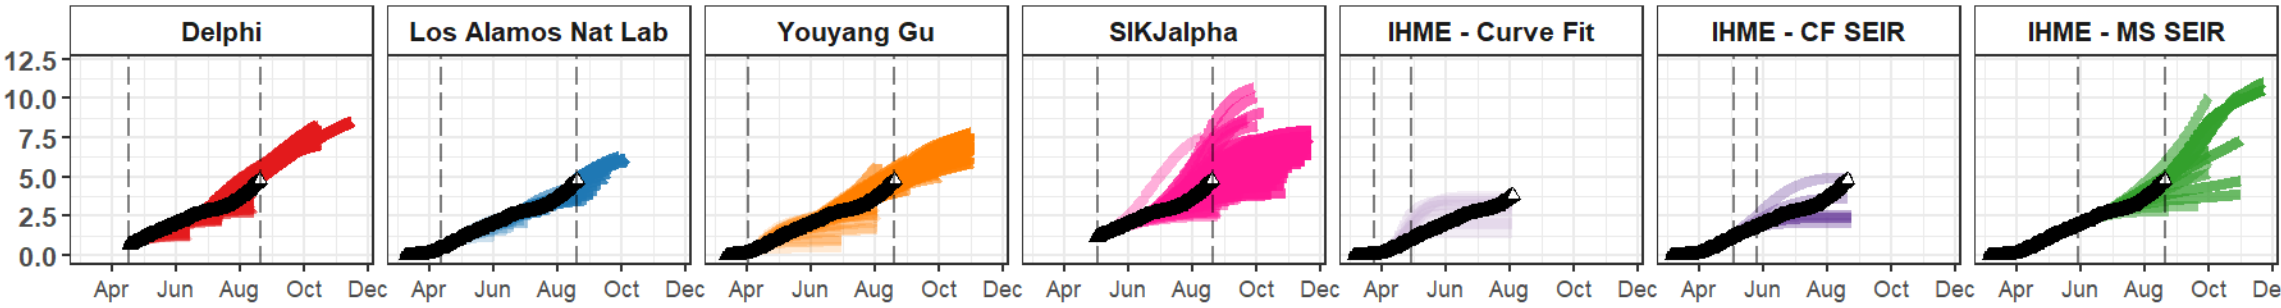

## All Cumulative Errors

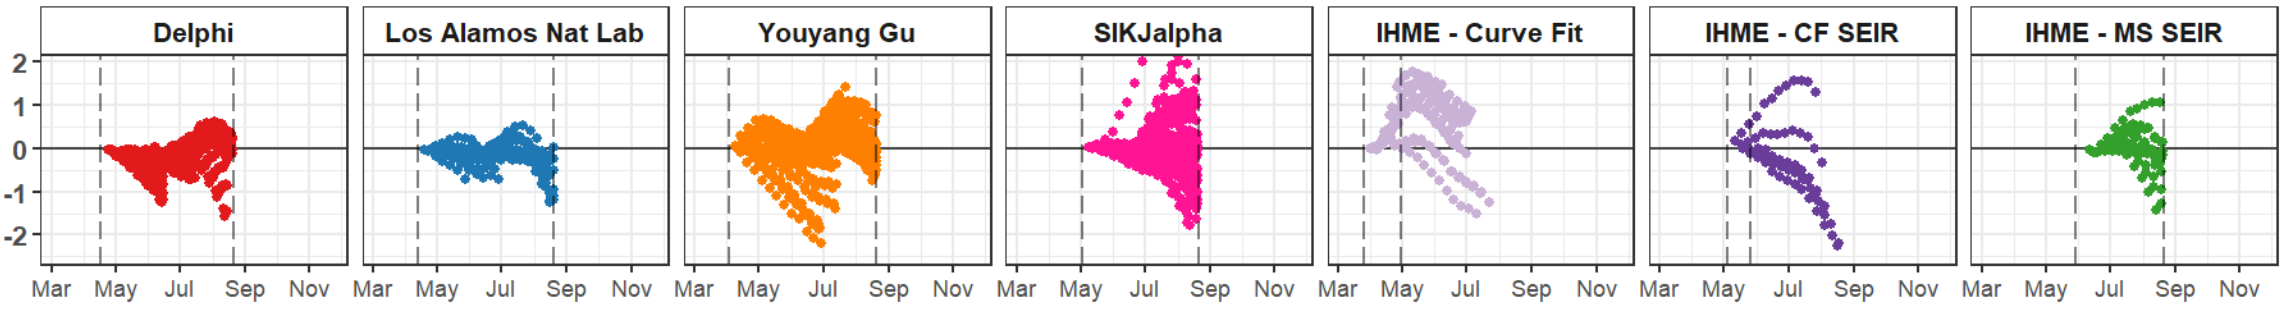

# China

## Current Forecast

Los Alamos Nat Lab    Youyang Gu    SIKJalpha

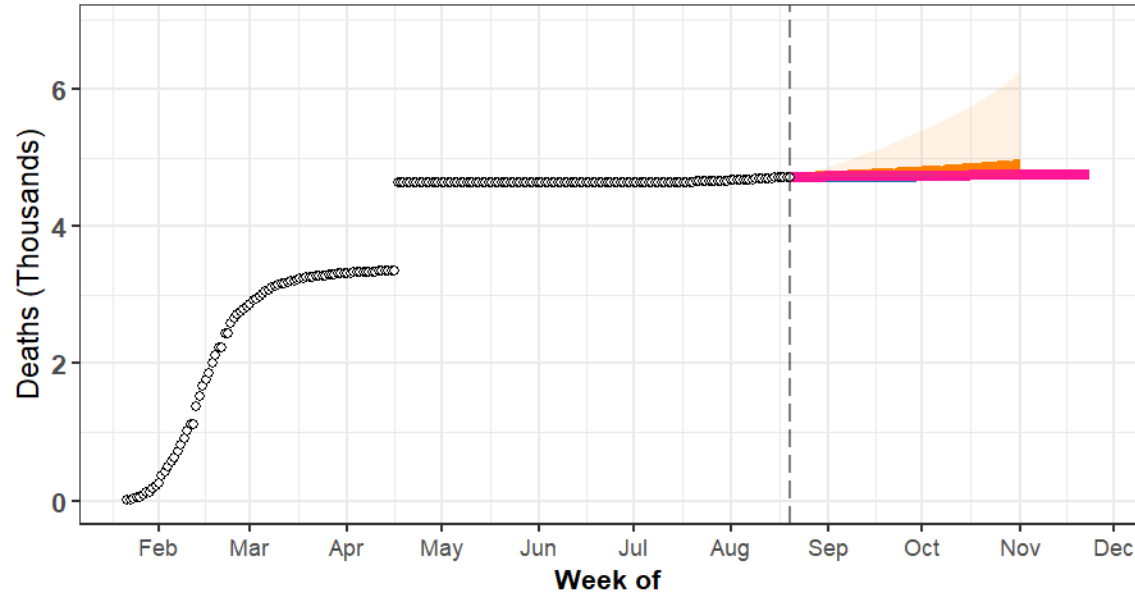

## Cumulative Out-Of-Sample Error (Post Intercept Shift)

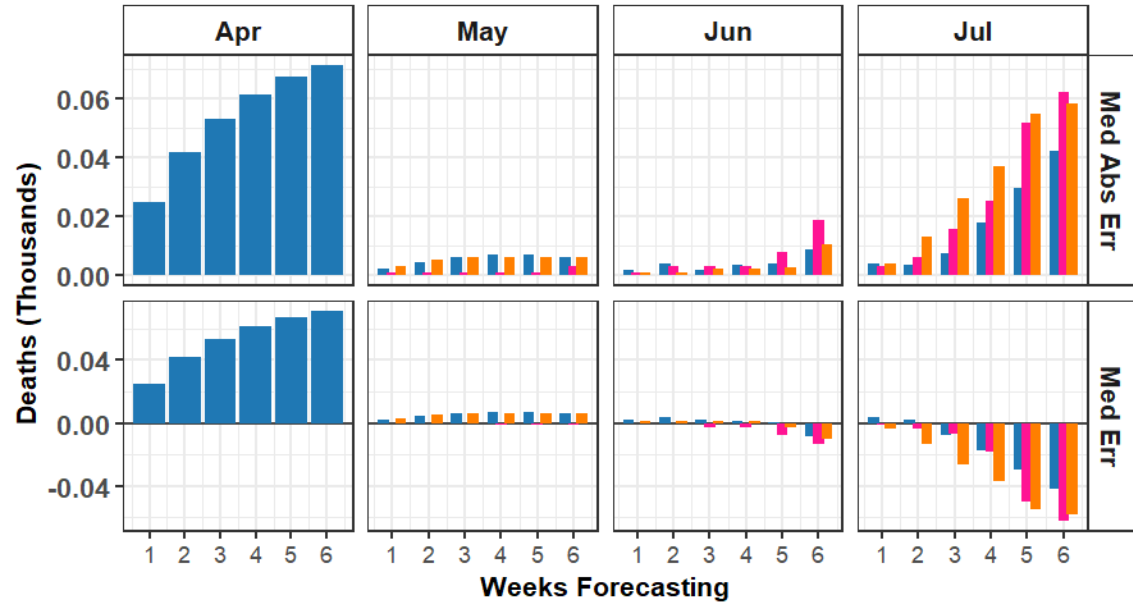

## All Model Versions

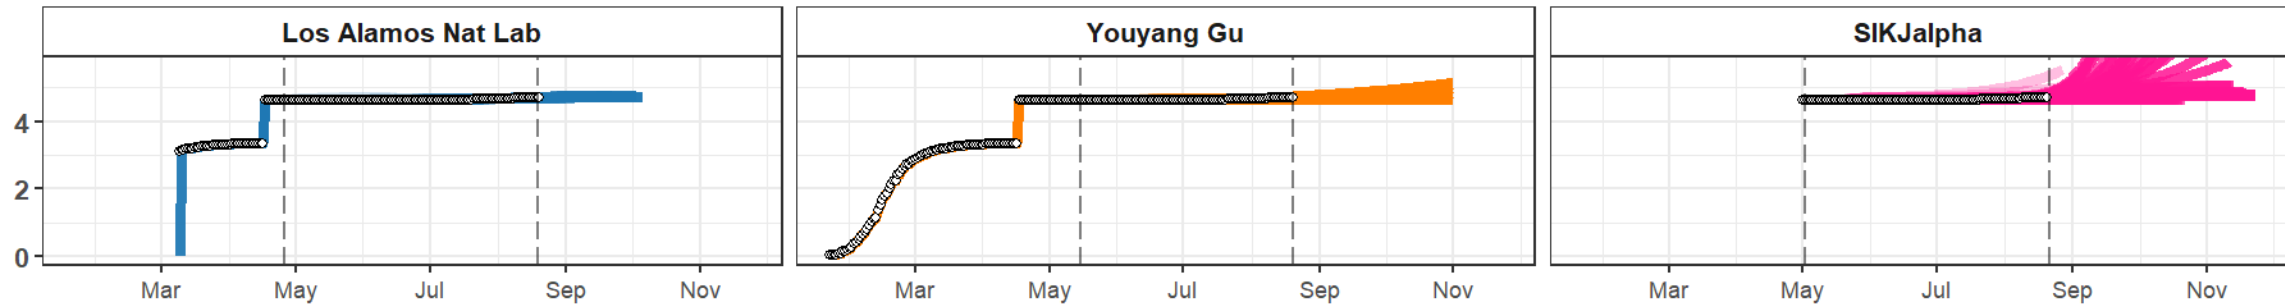

## All Cumulative Errors

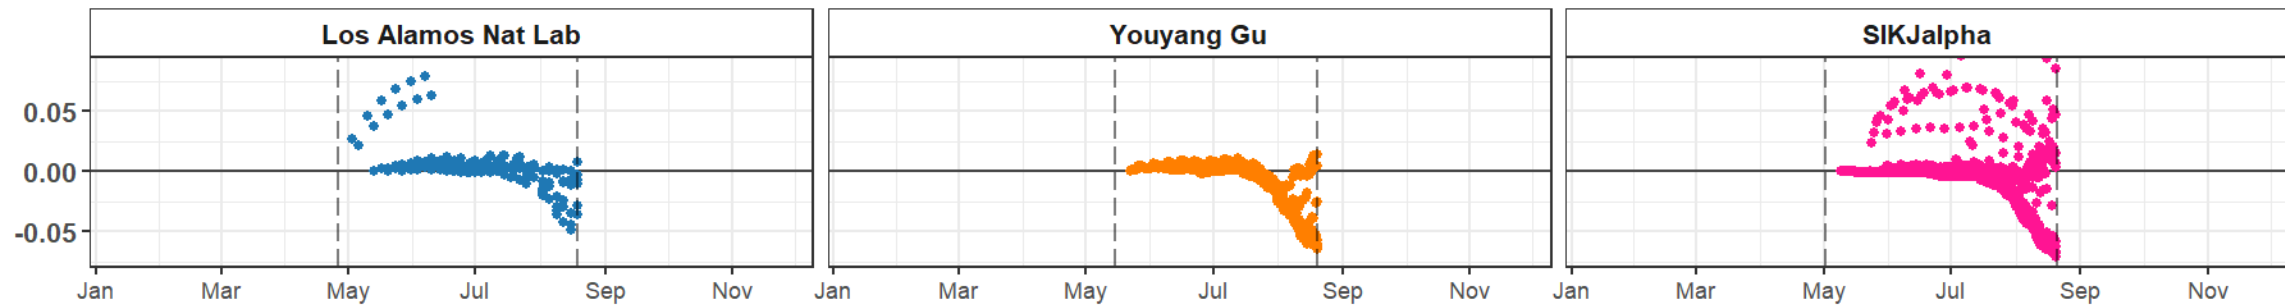

# Arizona

## Current Forecast

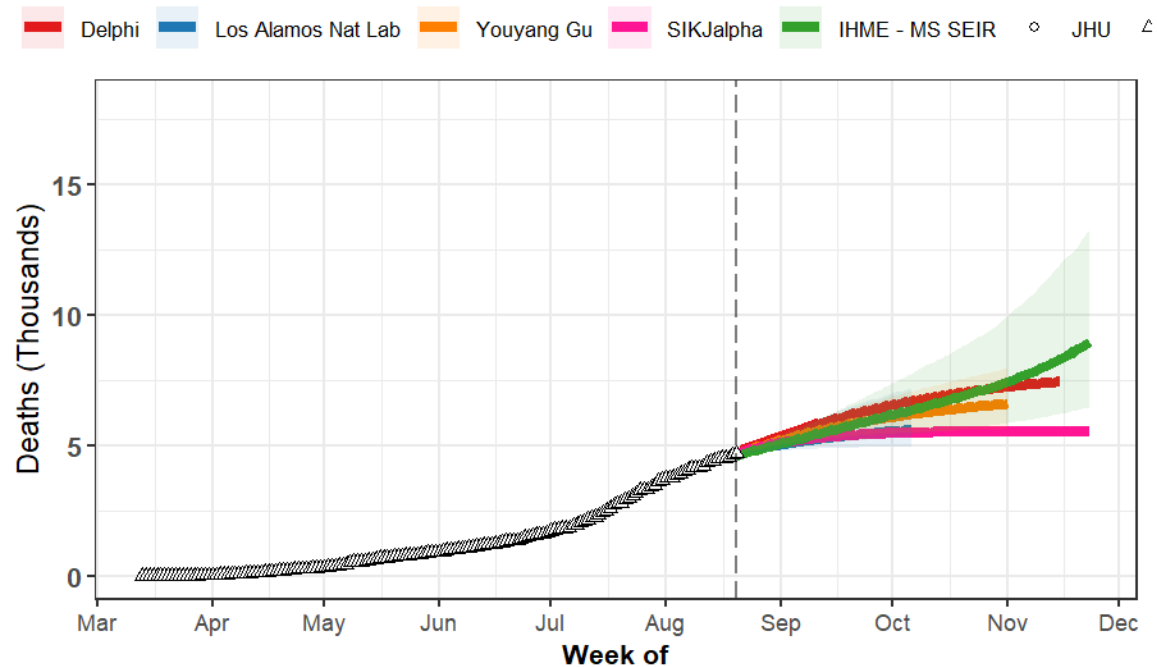

## Cumulative Out-Of-Sample Error (Post Intercept Shift)

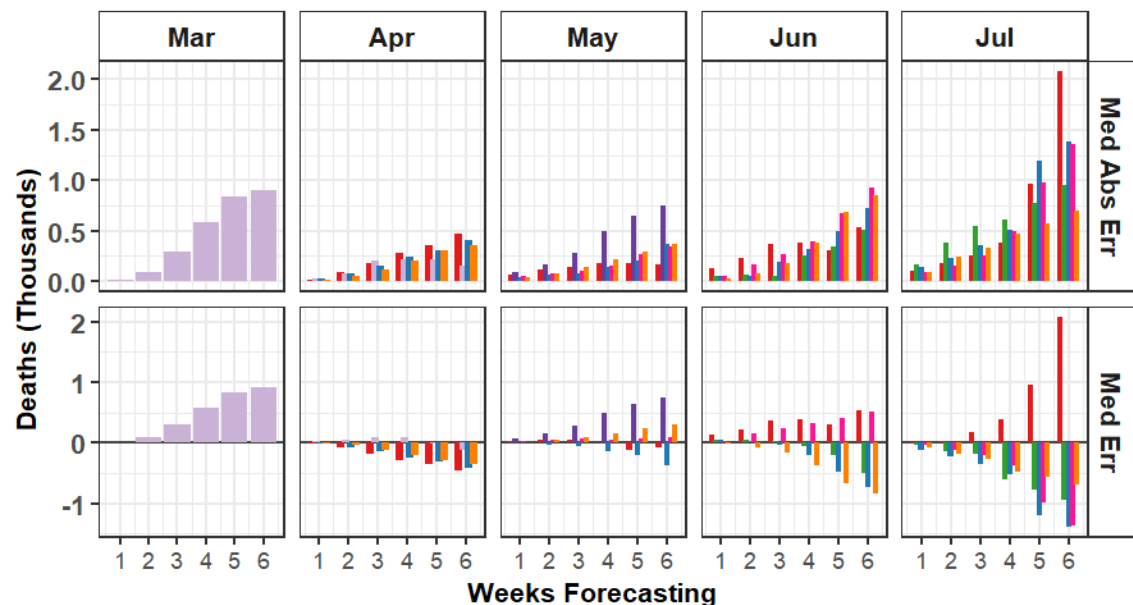

## All Model Versions

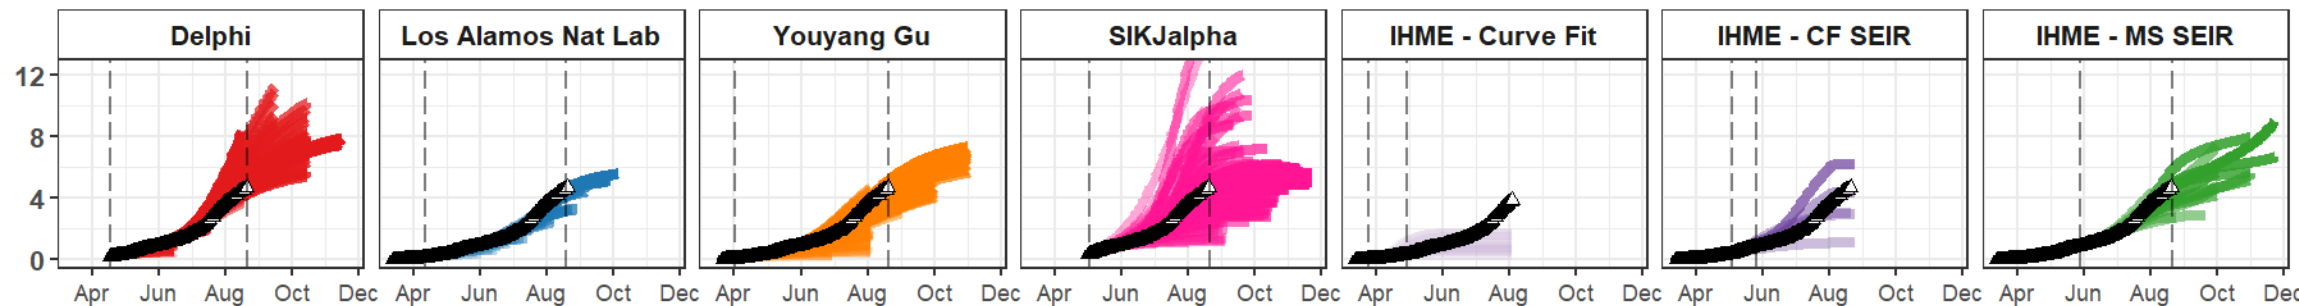

## All Cumulative Errors

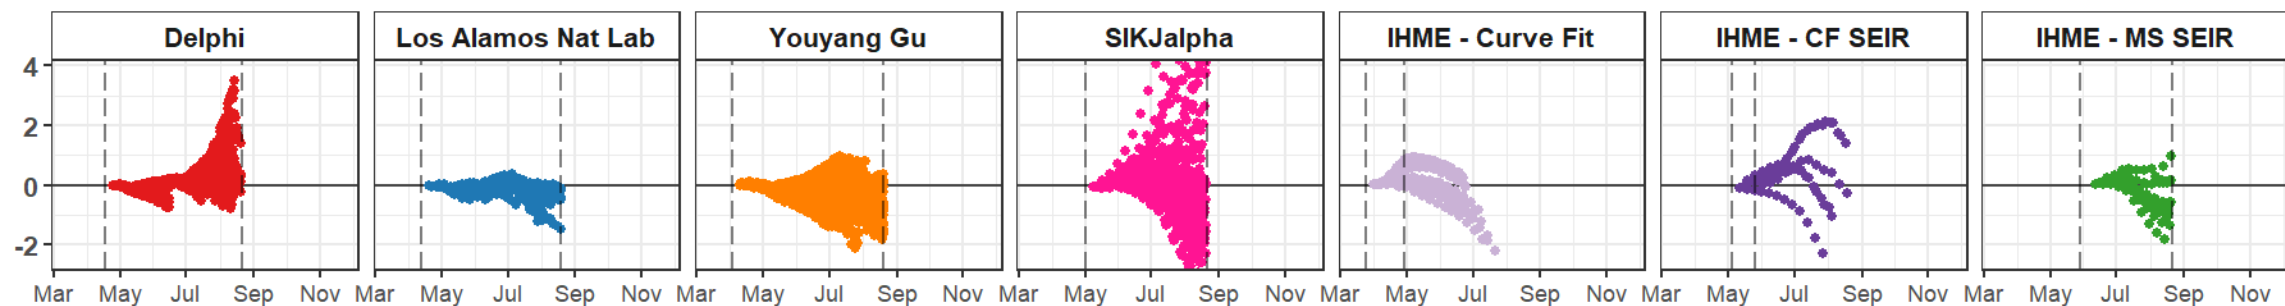

# Louisiana

## Current Forecast

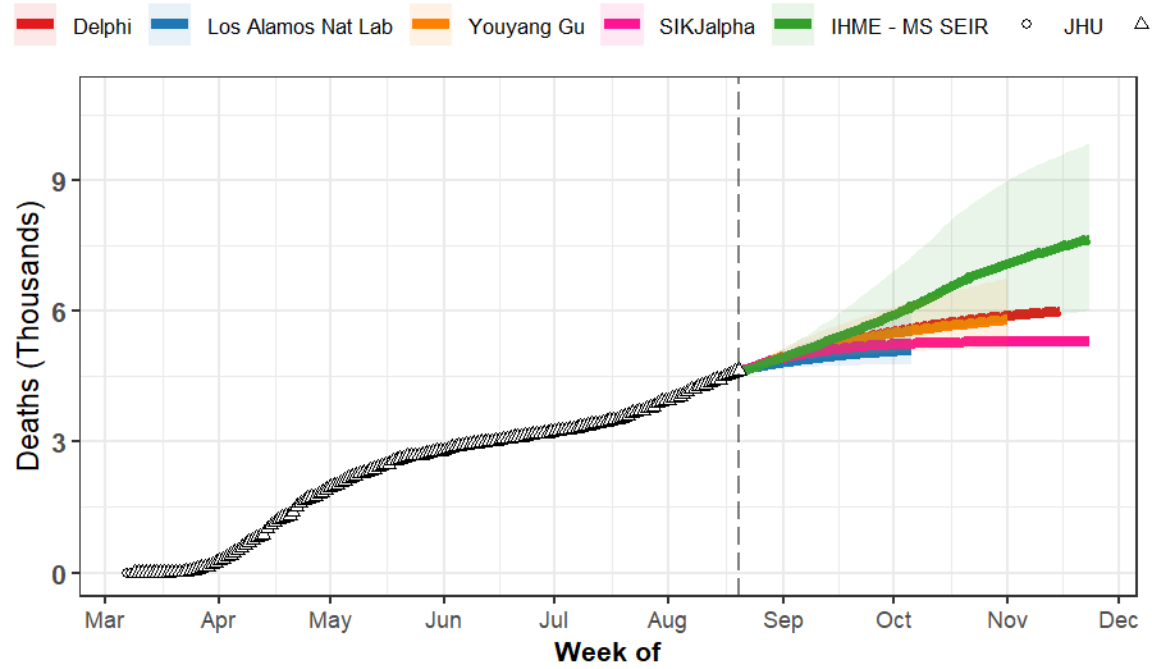

## Cumulative Out-Of-Sample Error (Post Intercept Shift)

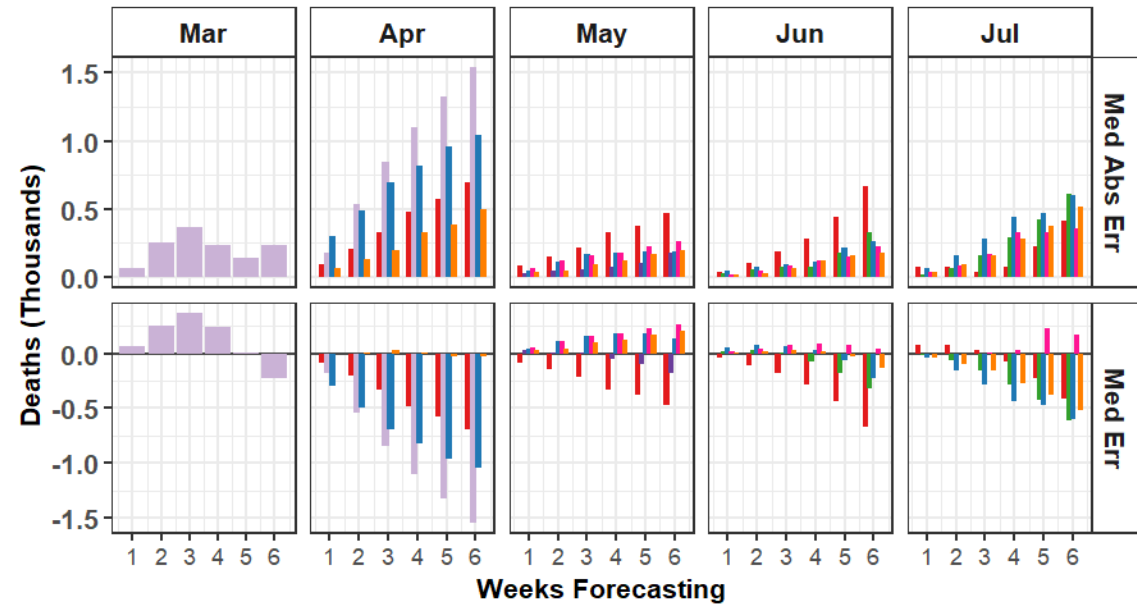

## All Model Versions

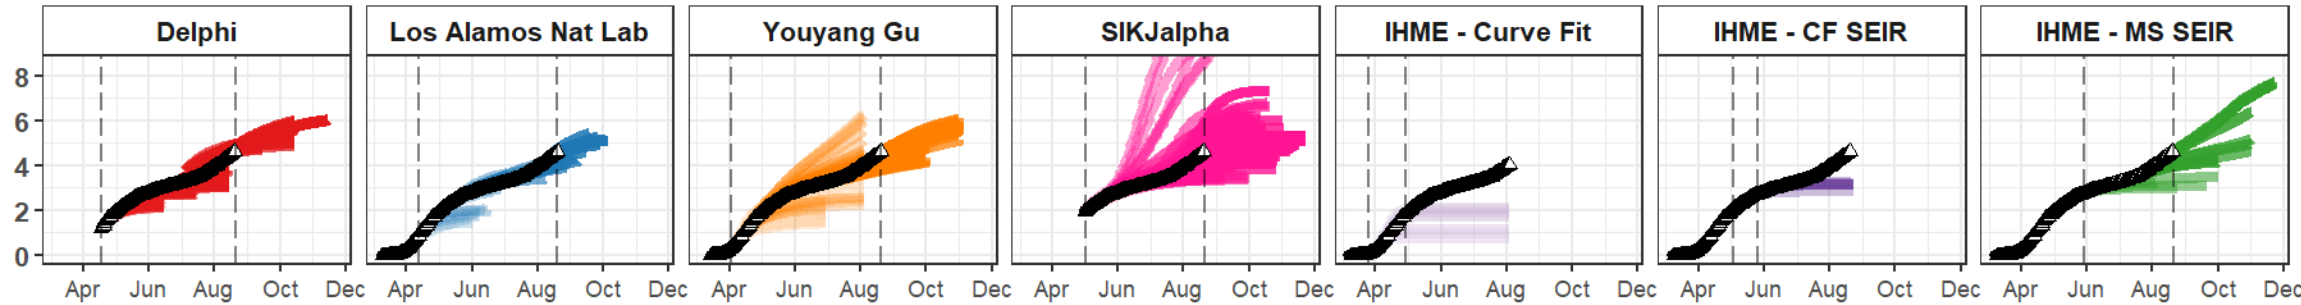

## All Cumulative Errors

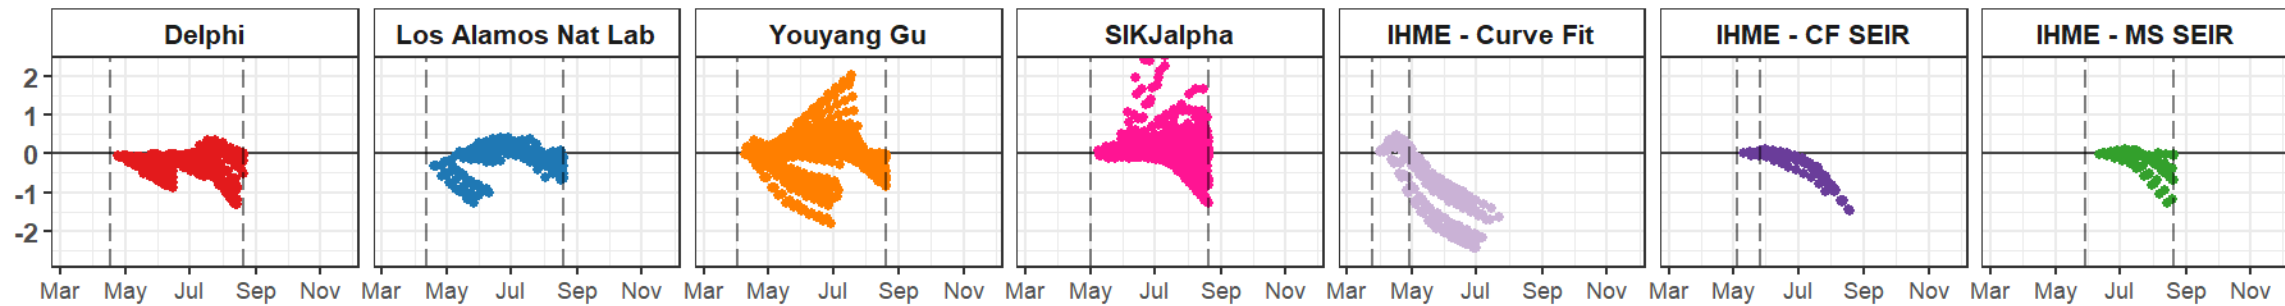

# Connecticut

## Current Forecast

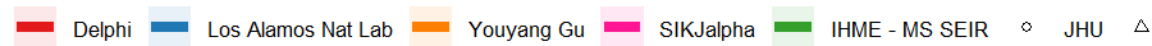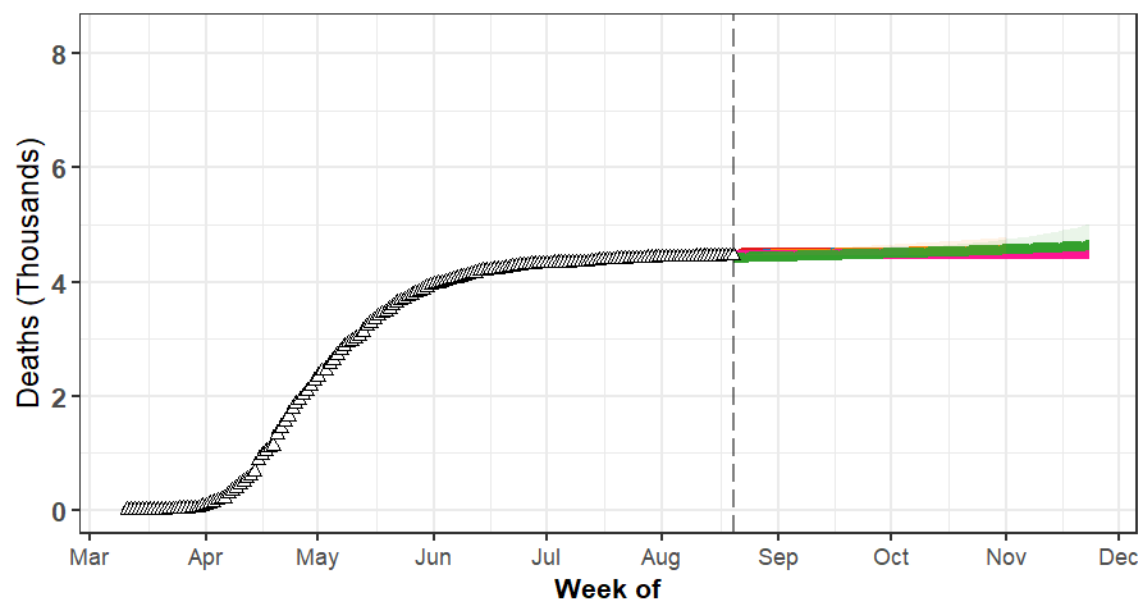

## Cumulative Out-Of-Sample Error (Post Intercept Shift)

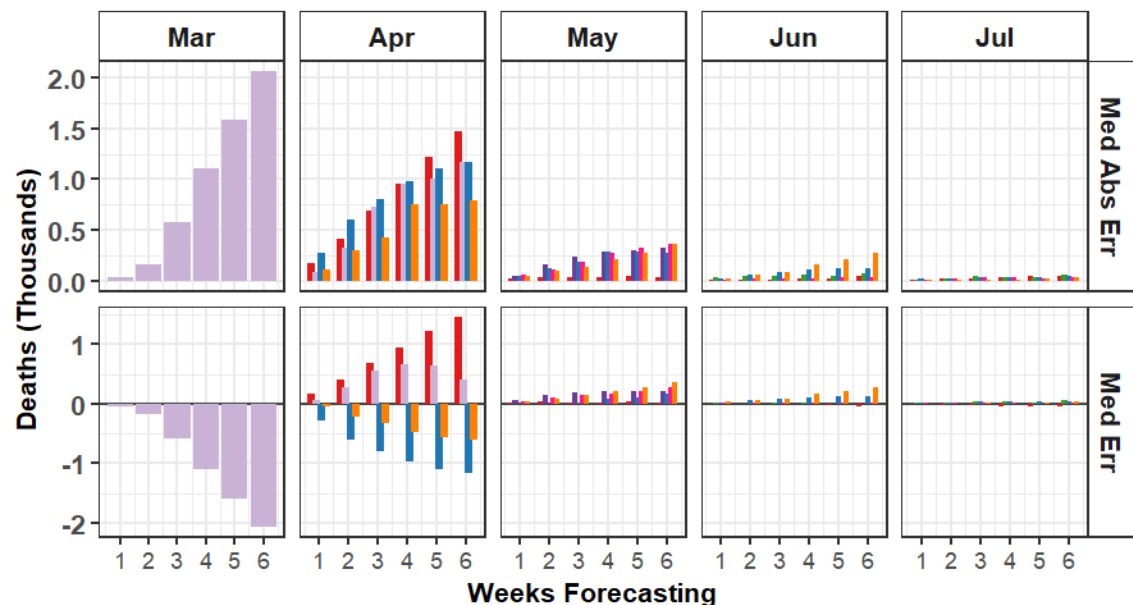

## All Model Versions

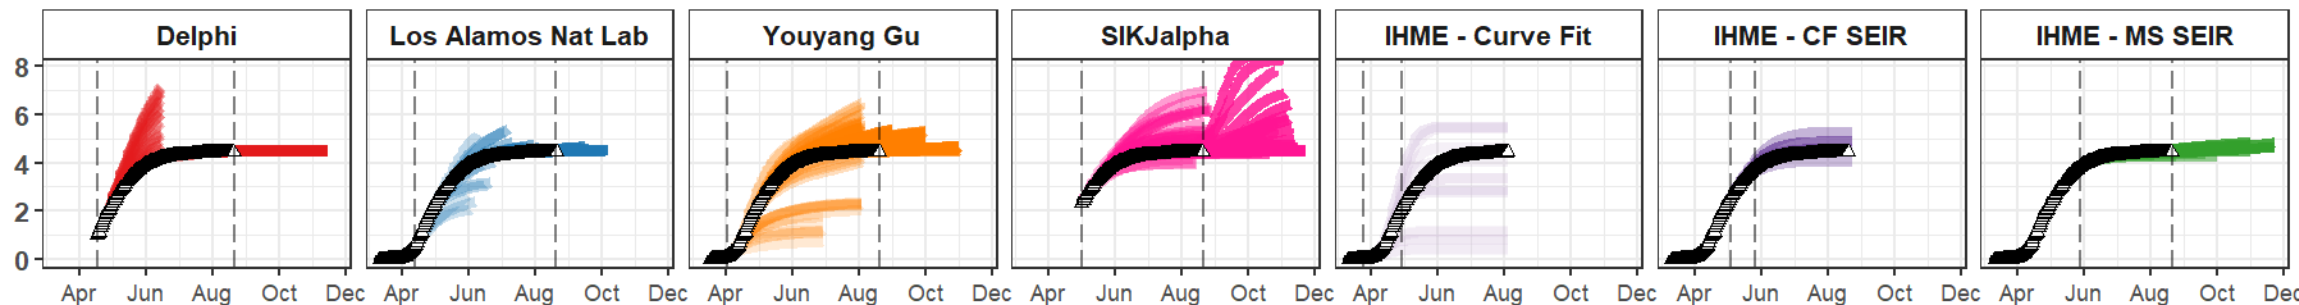

## All Cumulative Errors

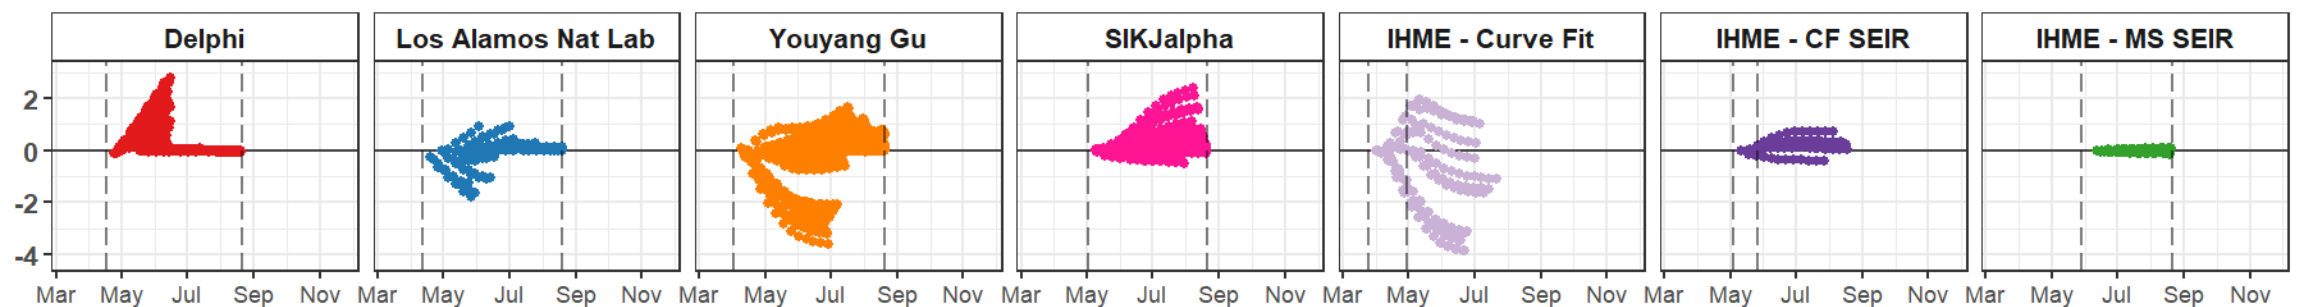

# Bolivia

## Current Forecast

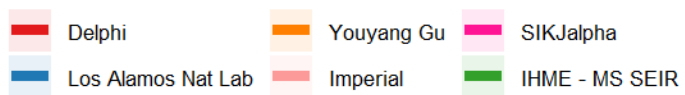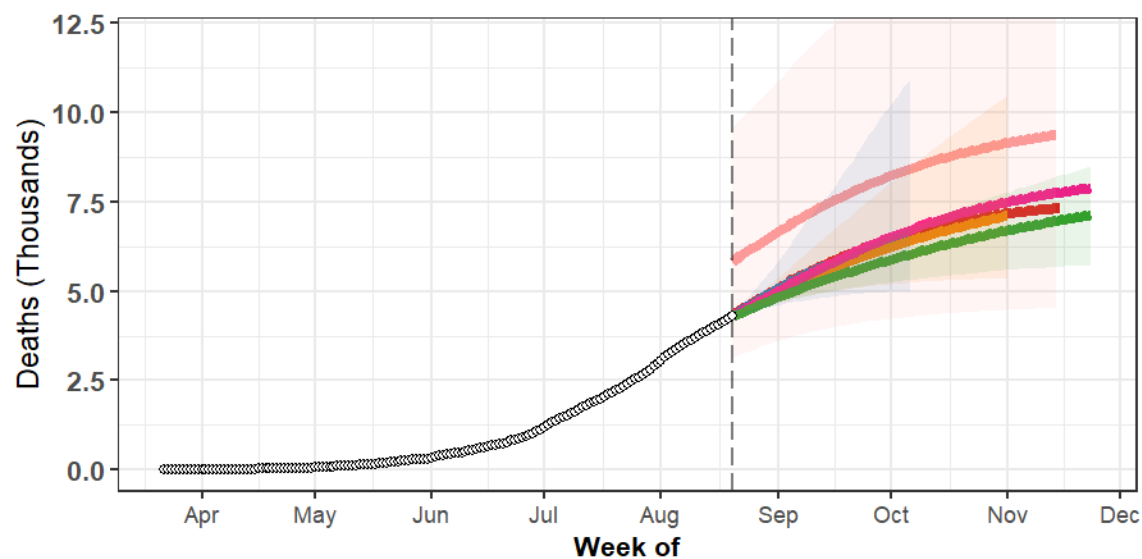

## Cumulative Out-Of-Sample Error (Post Intercept Shift)

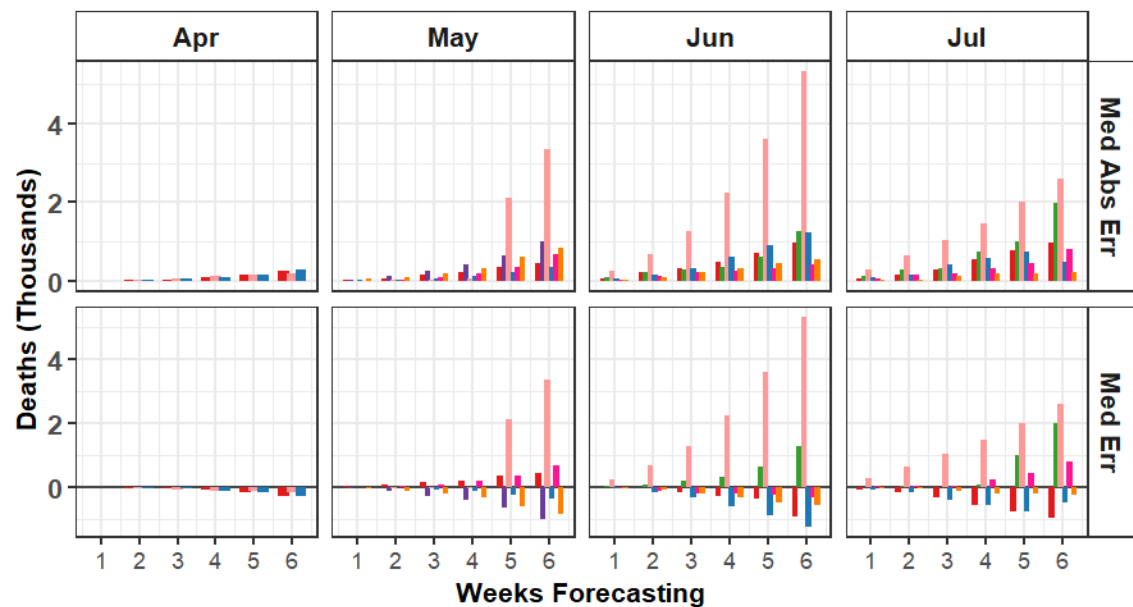

## All Model Versions

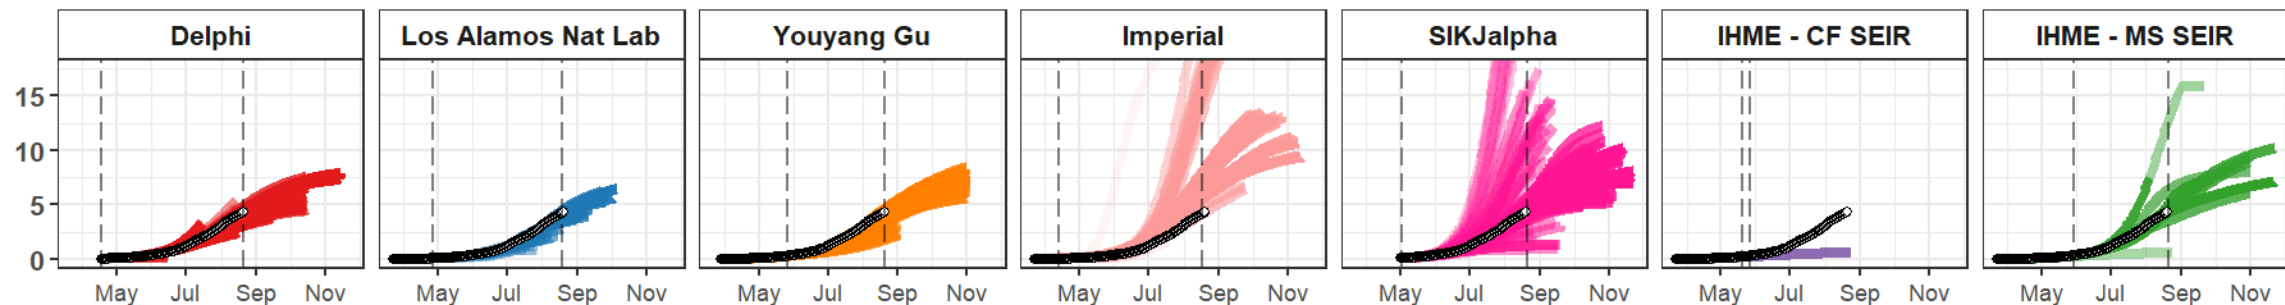

## All Cumulative Errors

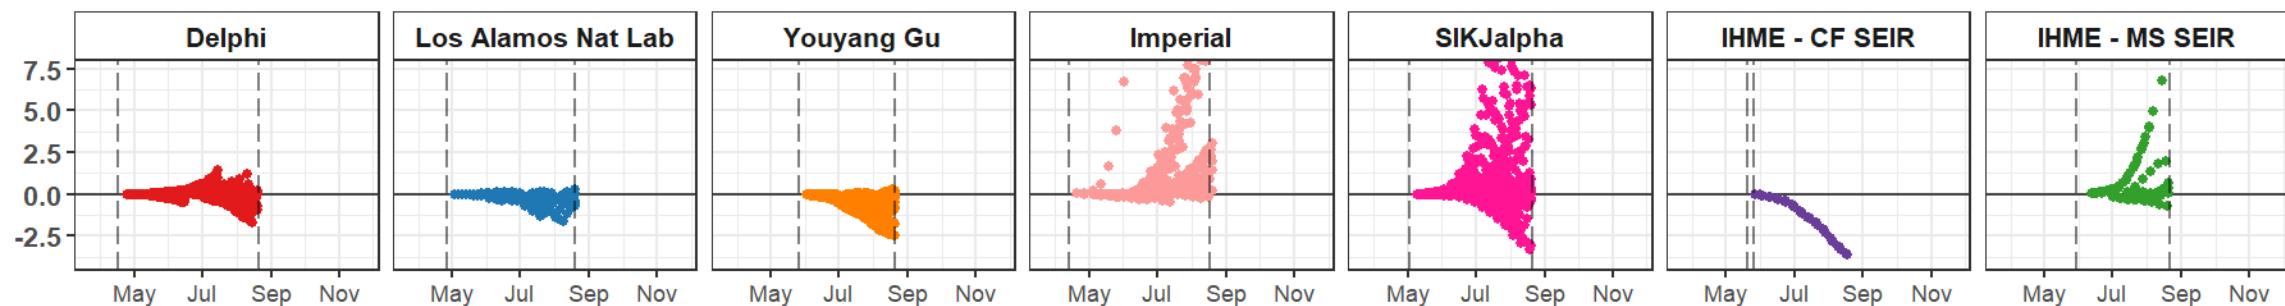

# Ohio

## Current Forecast

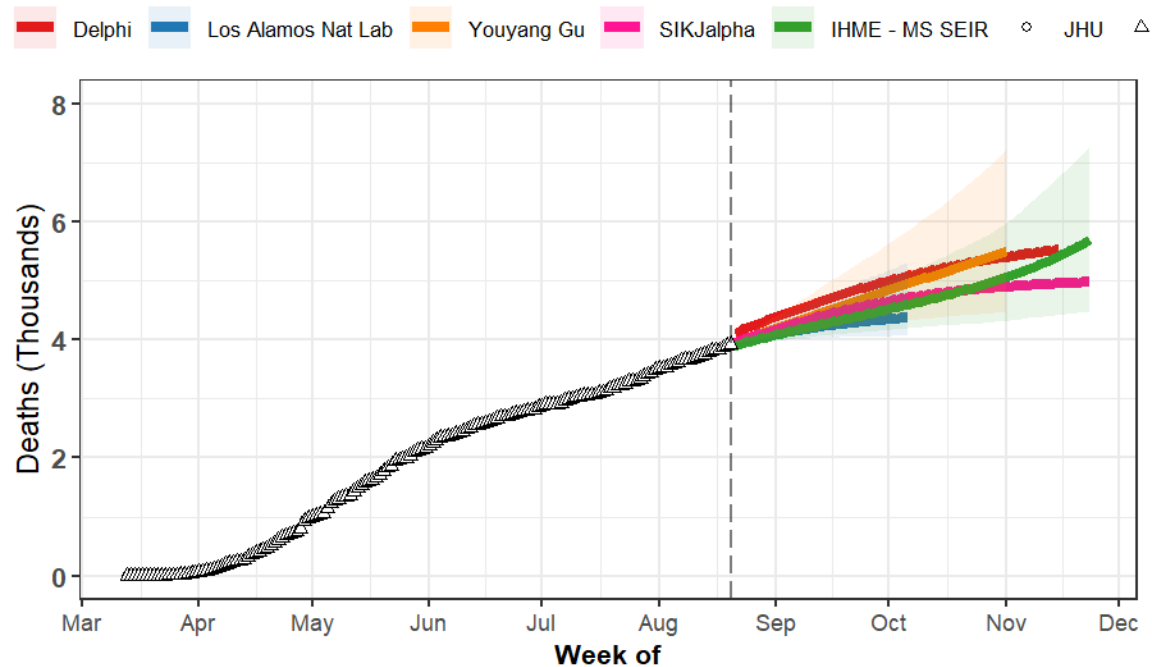

## Cumulative Out-Of-Sample Error (Post Intercept Shift)

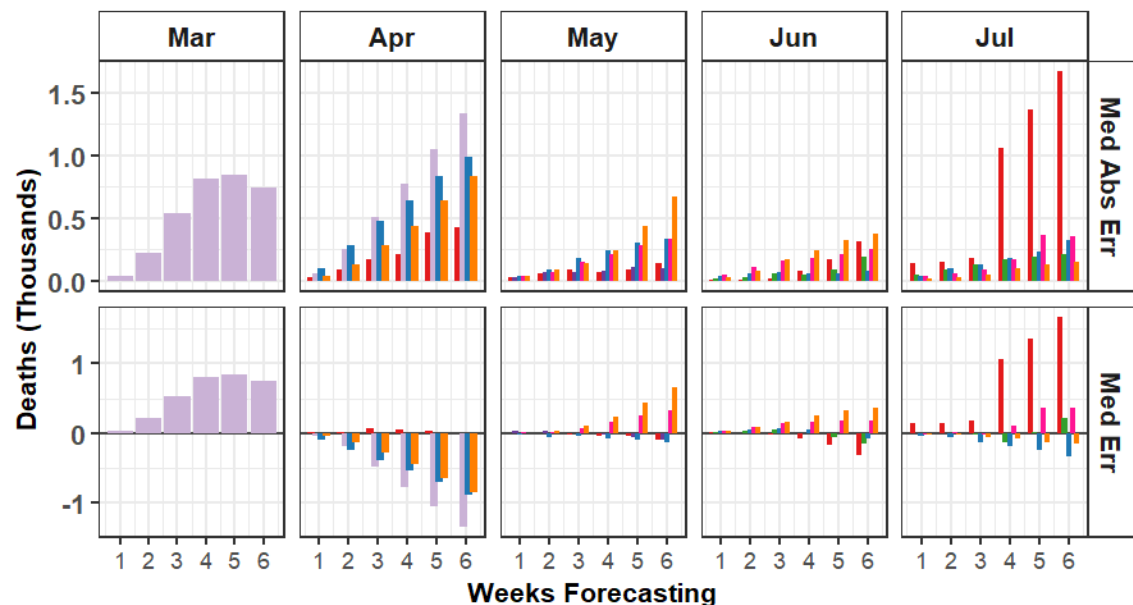

## All Model Versions

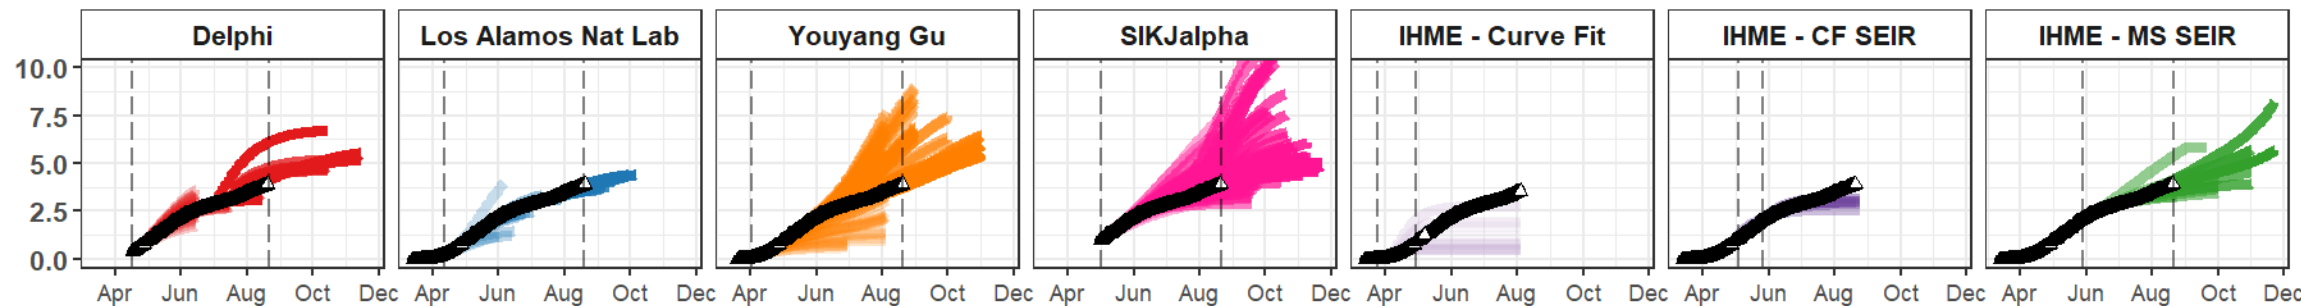

## All Cumulative Errors

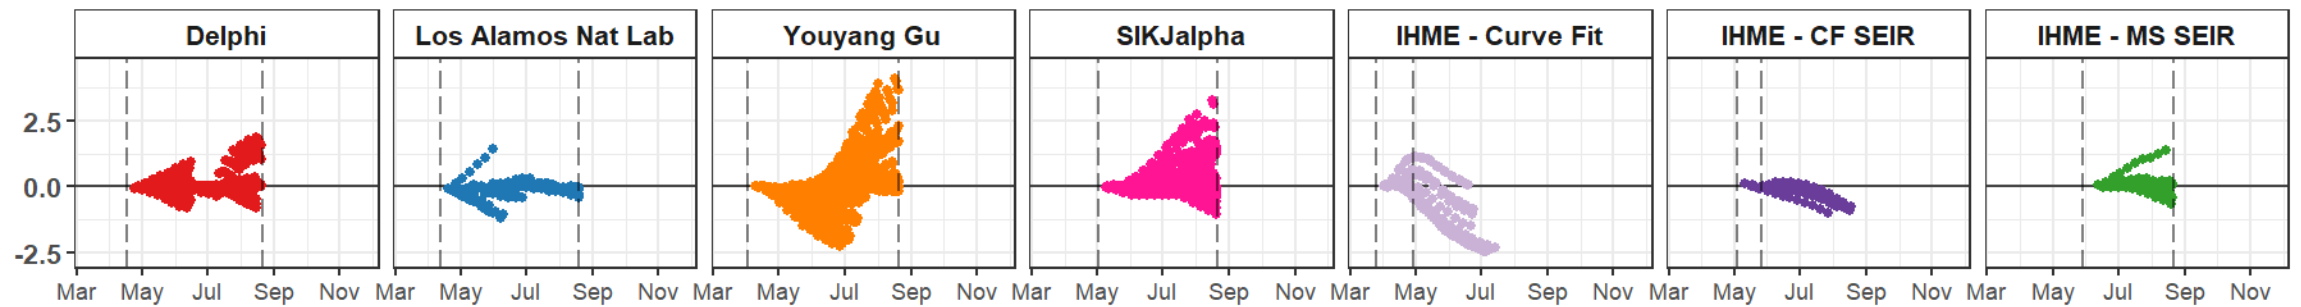



# Bangladesh

## Current Forecast

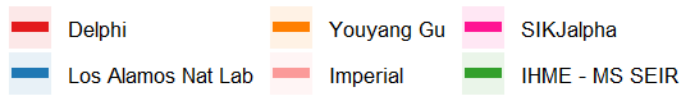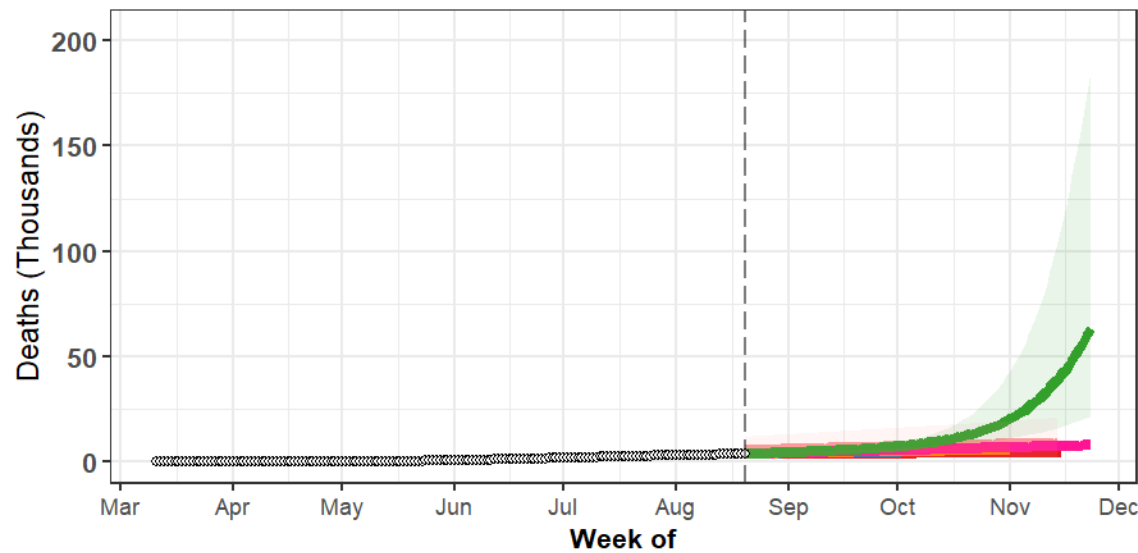

## Cumulative Out-Of-Sample Error (Post Intercept Shift)

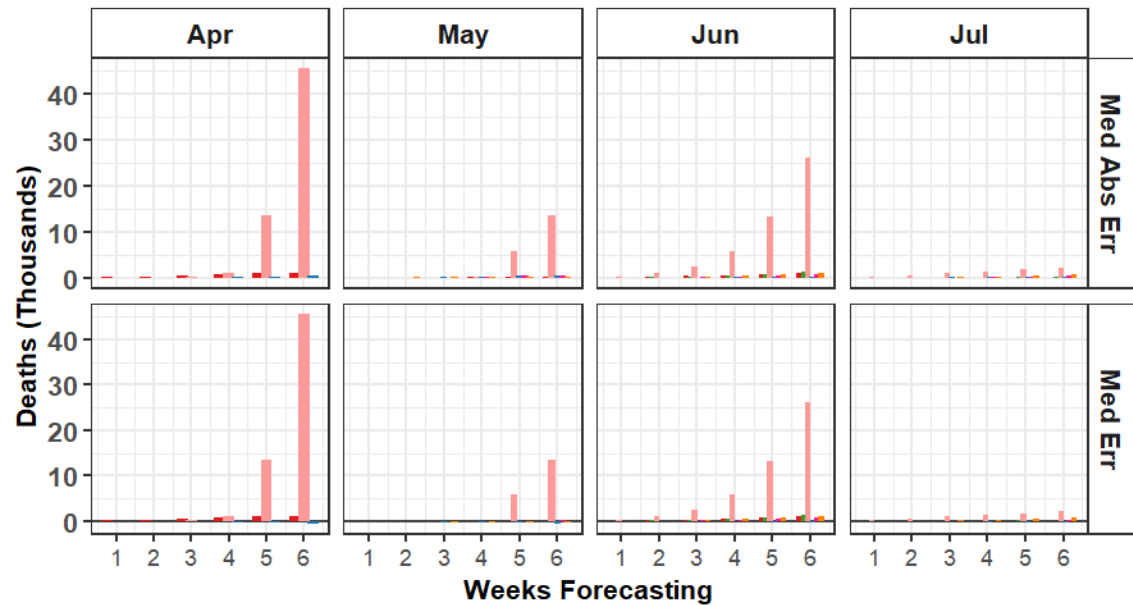

## All Model Versions

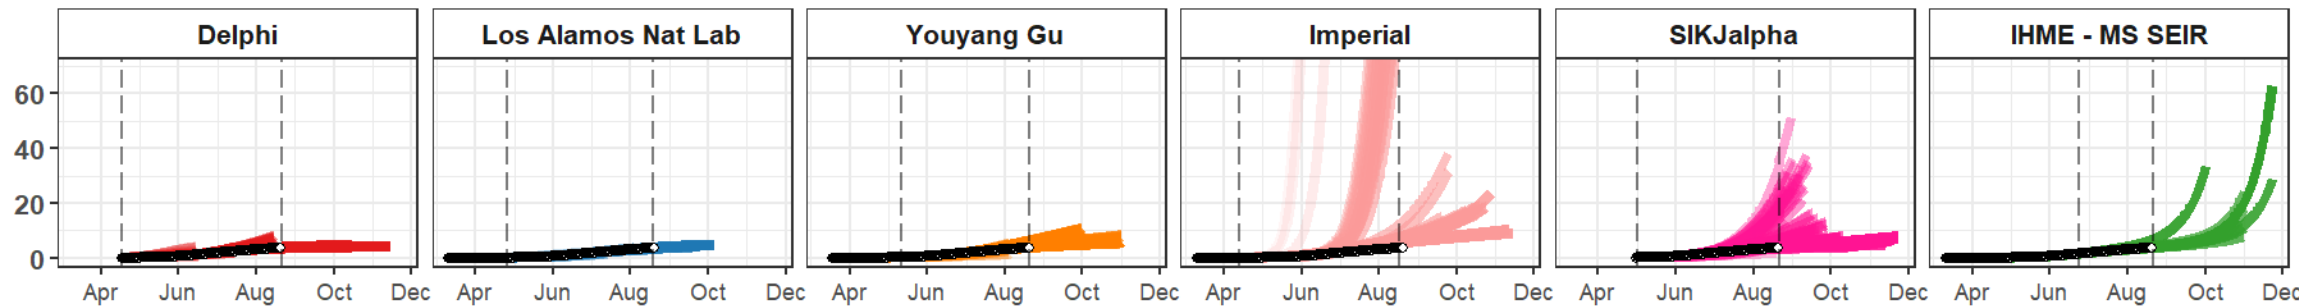

## All Cumulative Errors

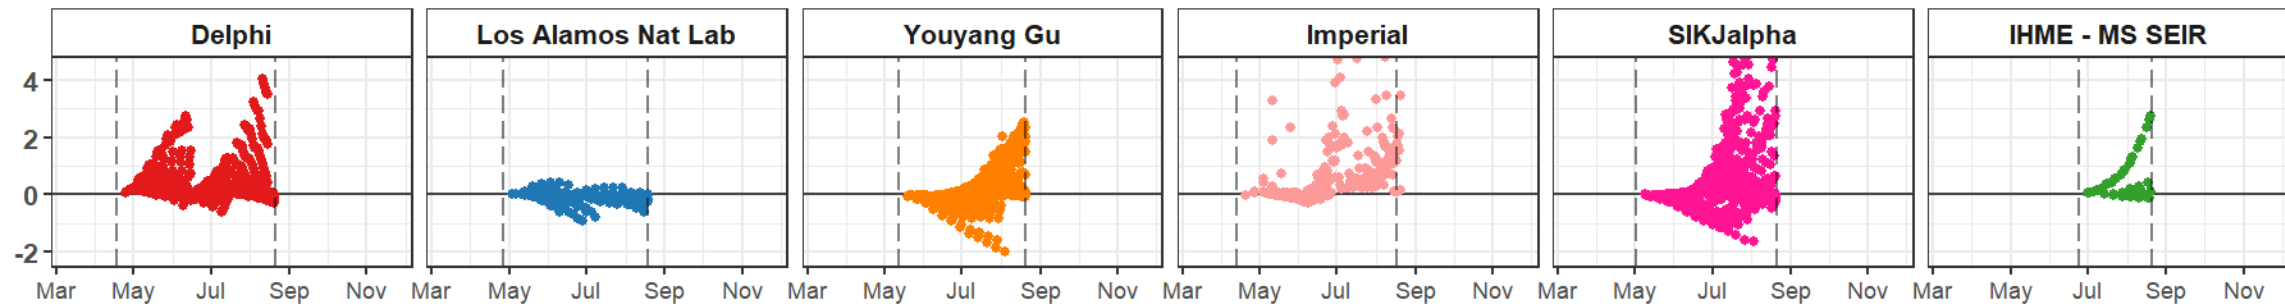

# Maryland

## Current Forecast

Delphi Los Alamos Nat Lab Youyang Gu SIKJalpha IHME - MS SEIR JHU

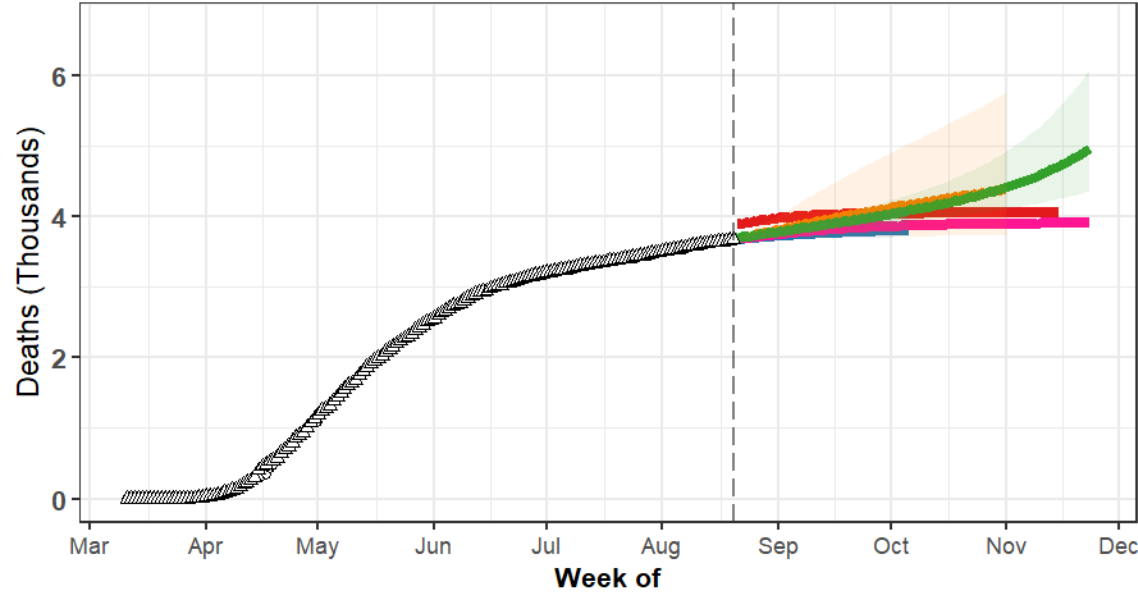

## Cumulative Out-Of-Sample Error (Post Intercept Shift)

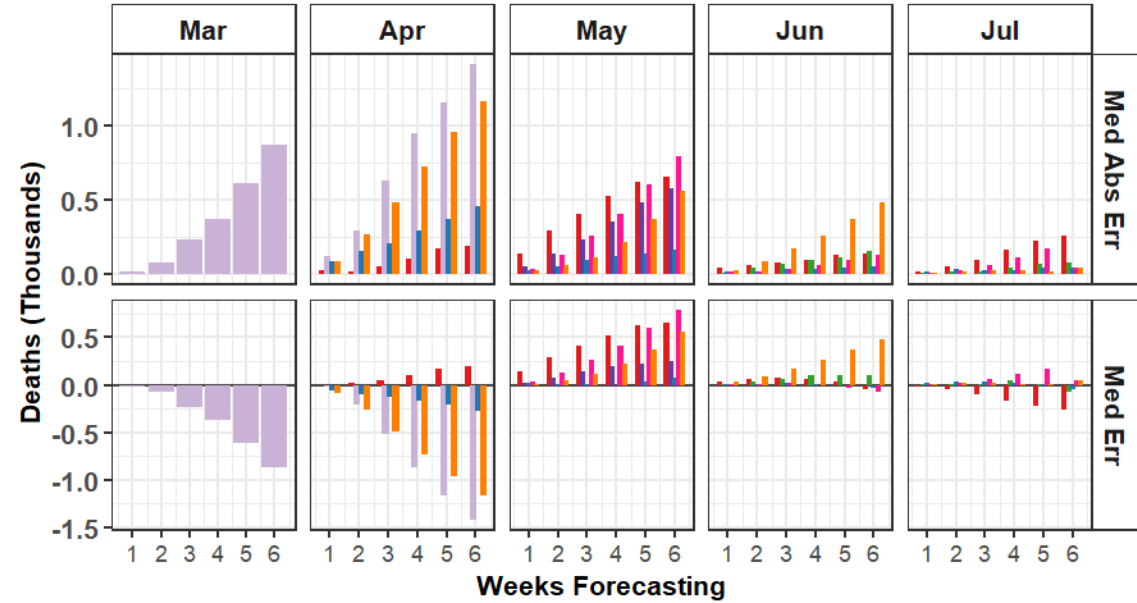

## All Model Versions

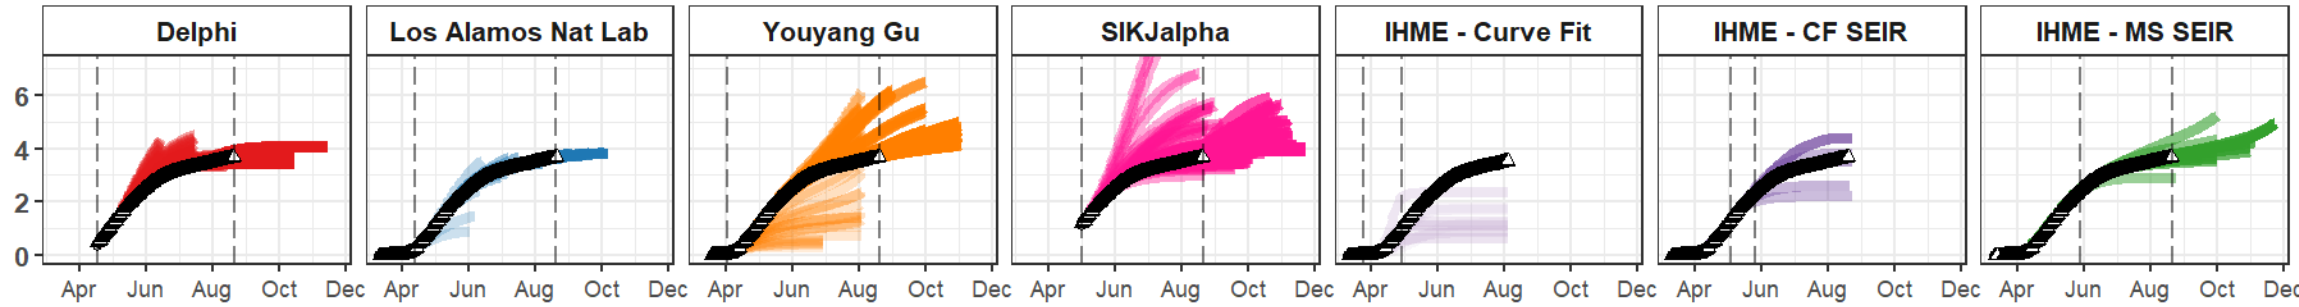

## All Cumulative Errors

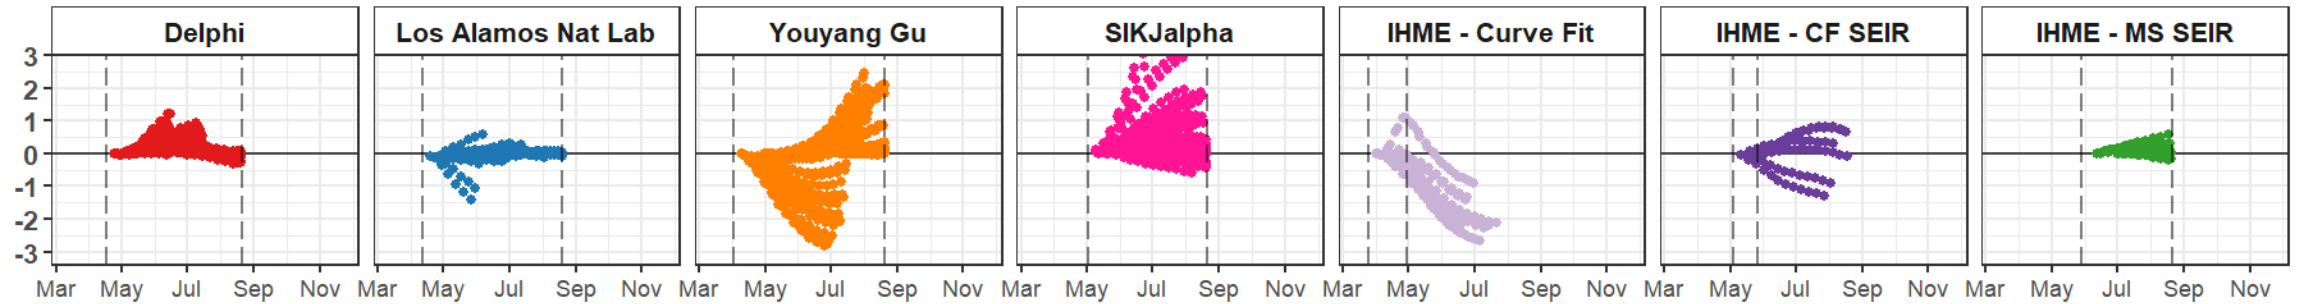

# Saudi Arabia

## Current Forecast

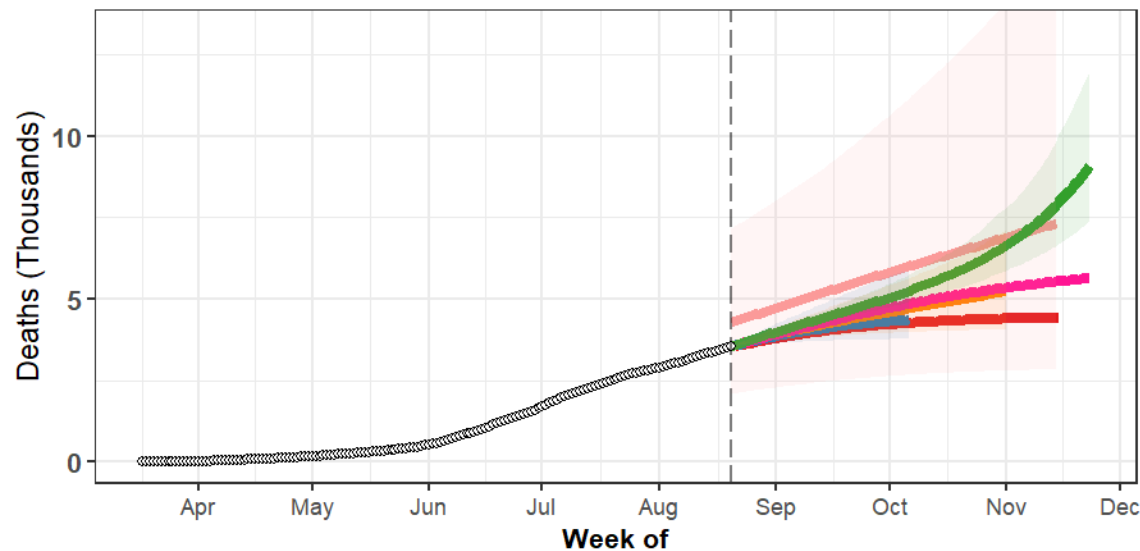

## Cumulative Out-Of-Sample Error (Post Intercept Shift)

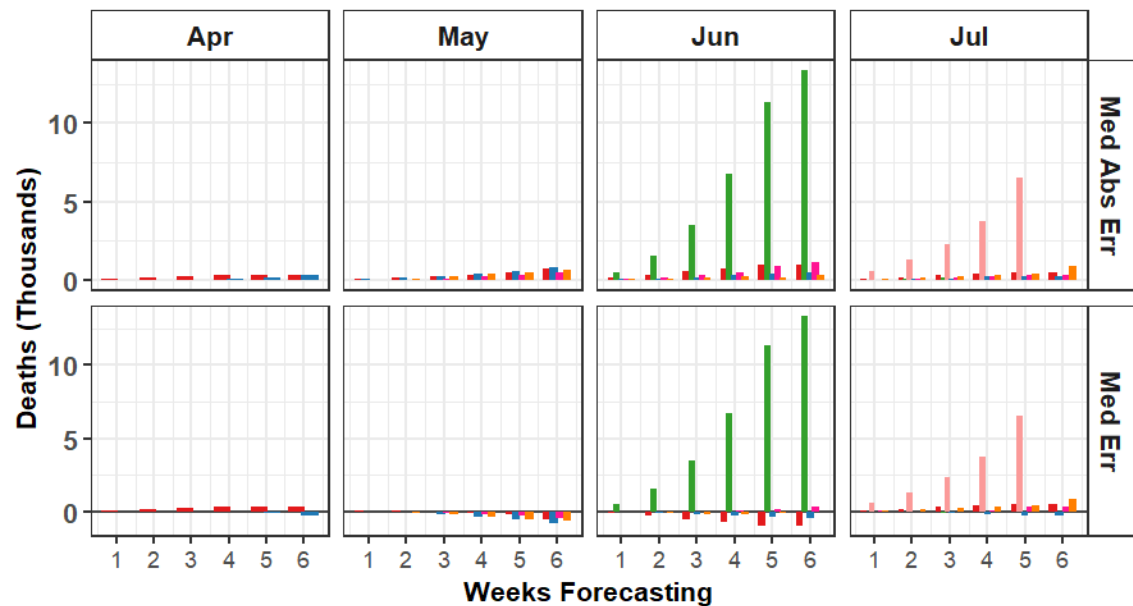

## All Model Versions

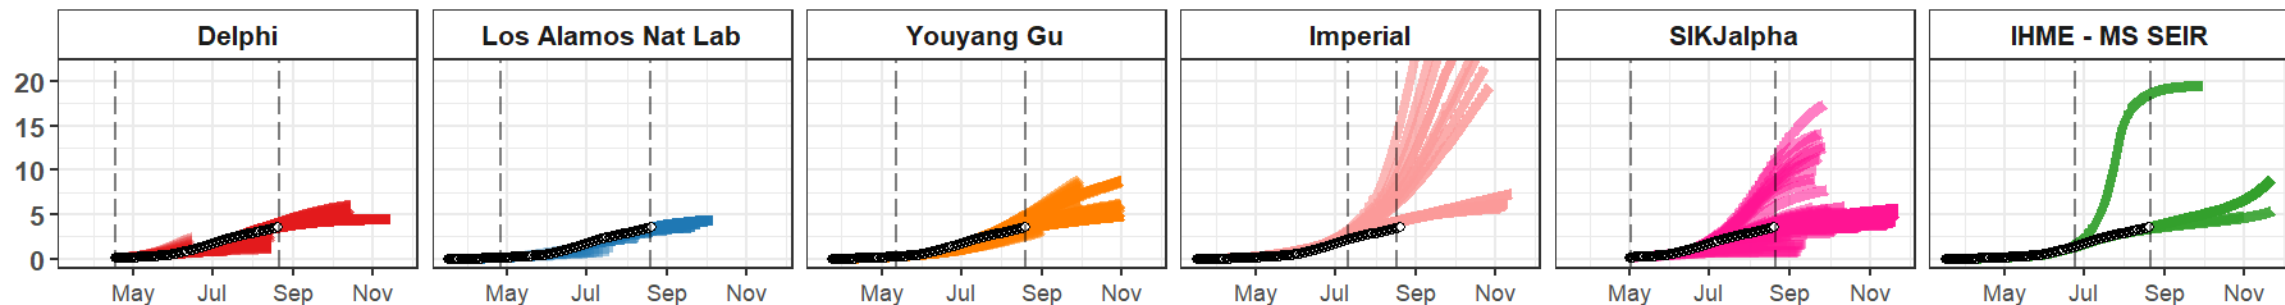

## All Cumulative Errors

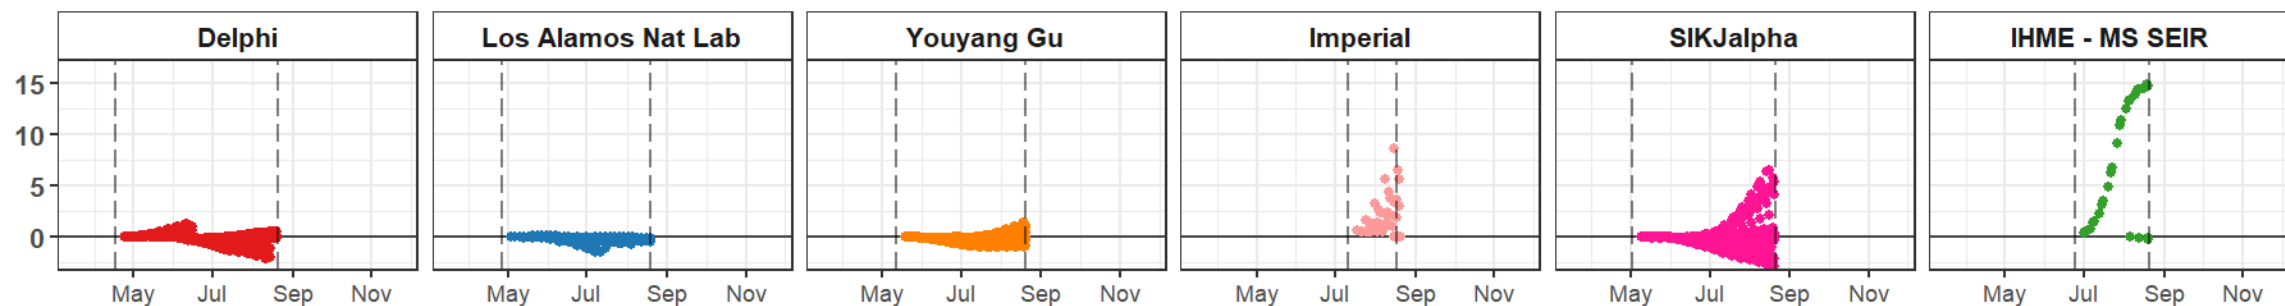

# Indiana

## Current Forecast

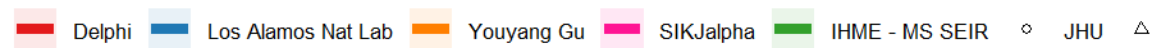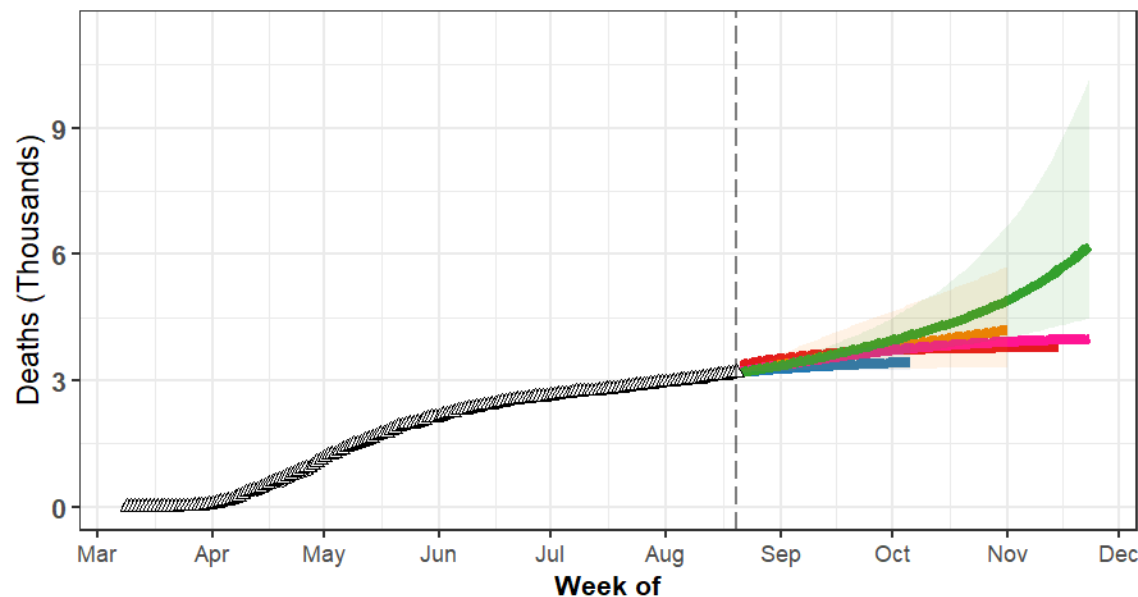

## Cumulative Out-Of-Sample Error (Post Intercept Shift)

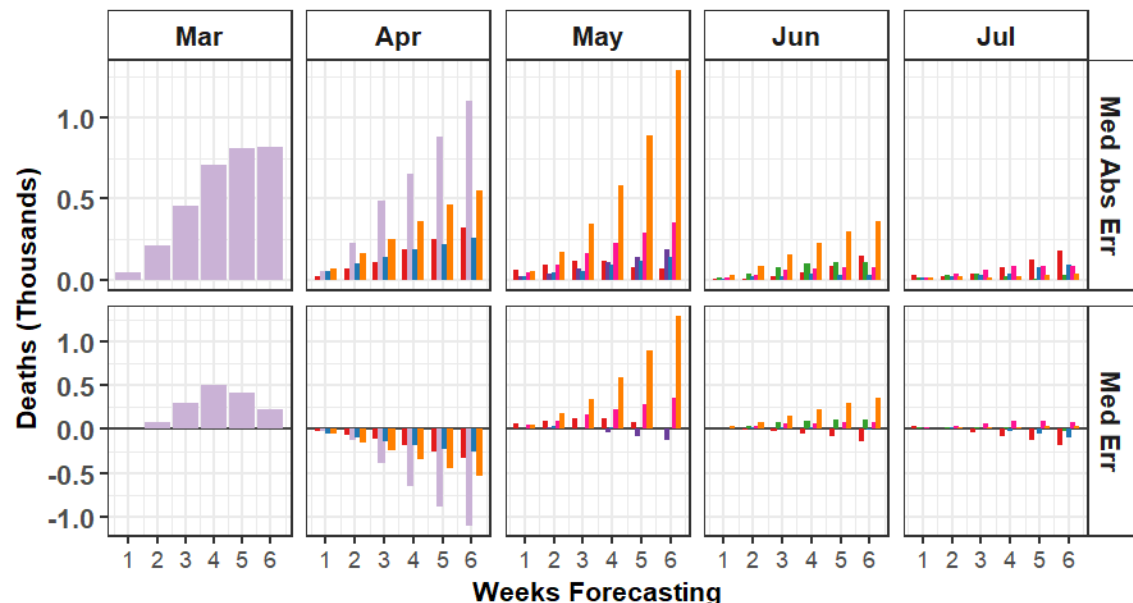

## All Model Versions

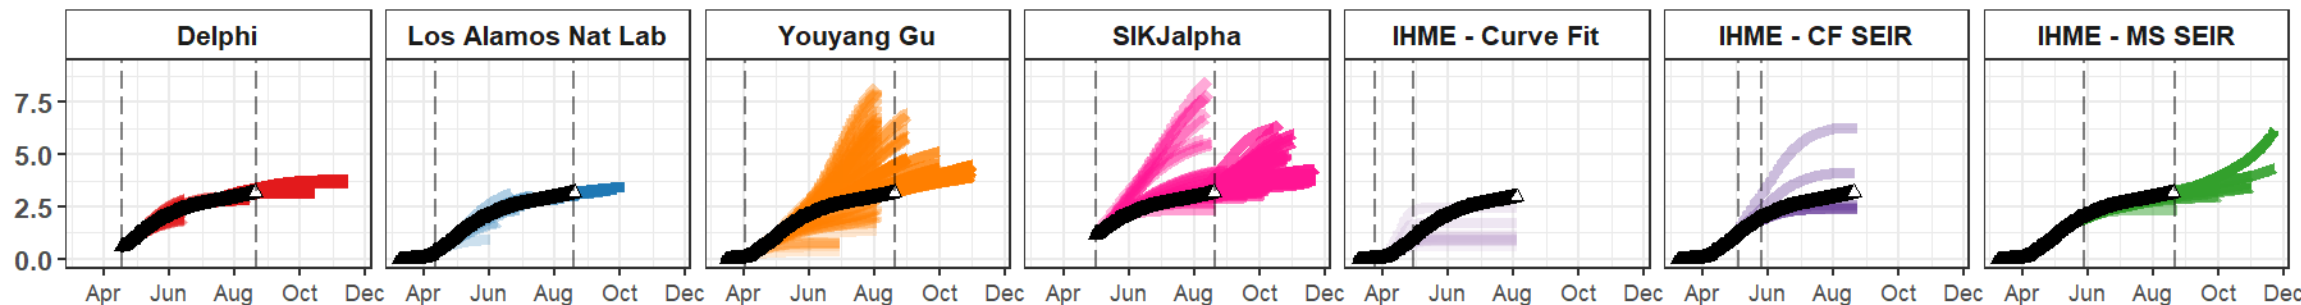

## All Cumulative Errors

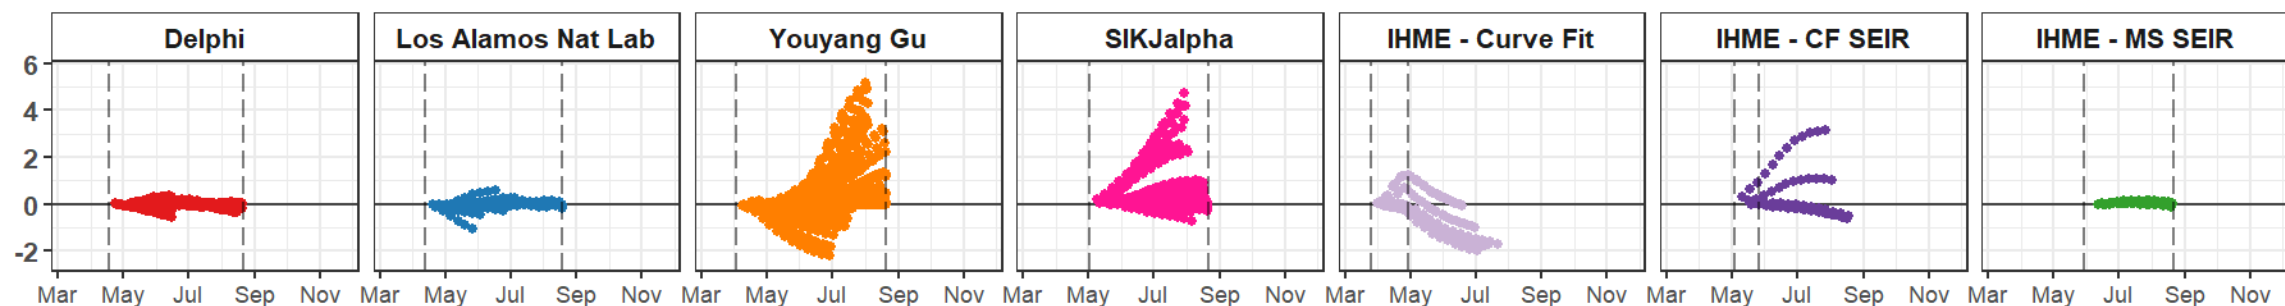

# Romania

## Current Forecast

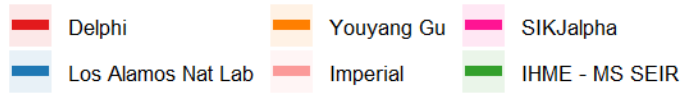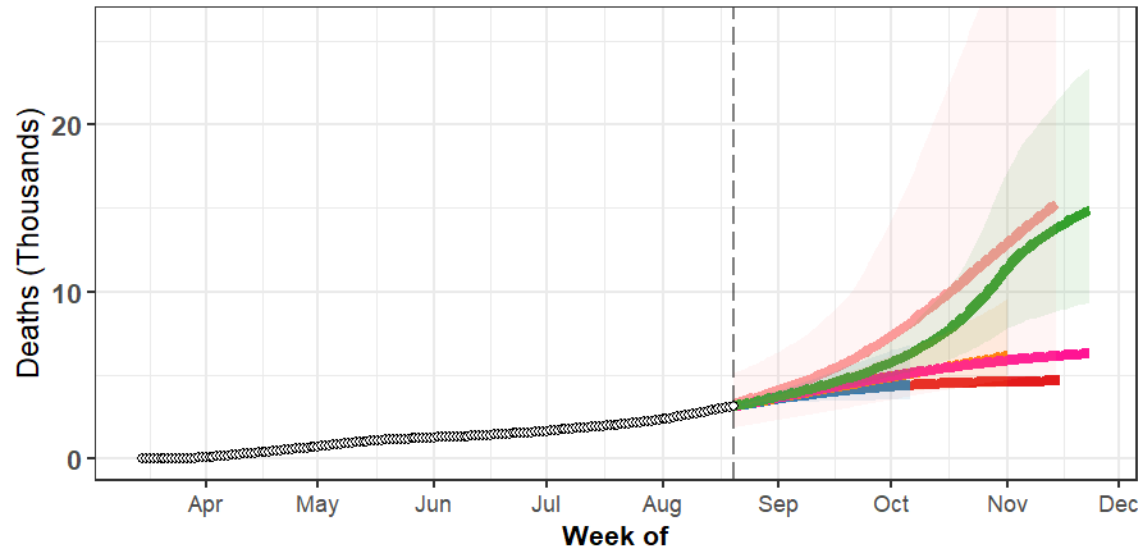

## Cumulative Out-Of-Sample Error (Post Intercept Shift)

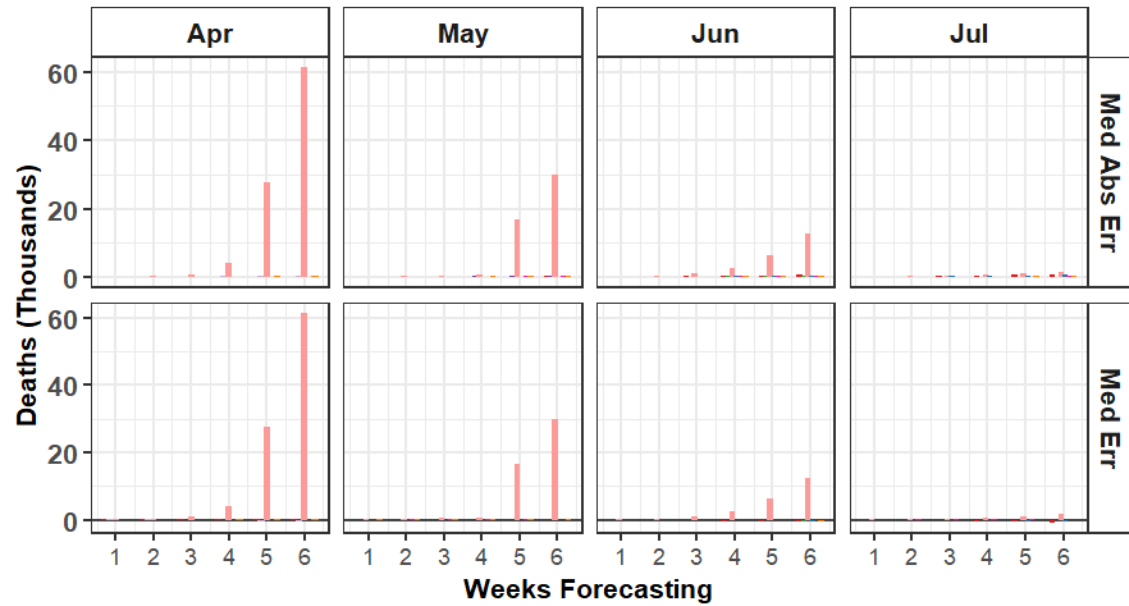

## All Model Versions

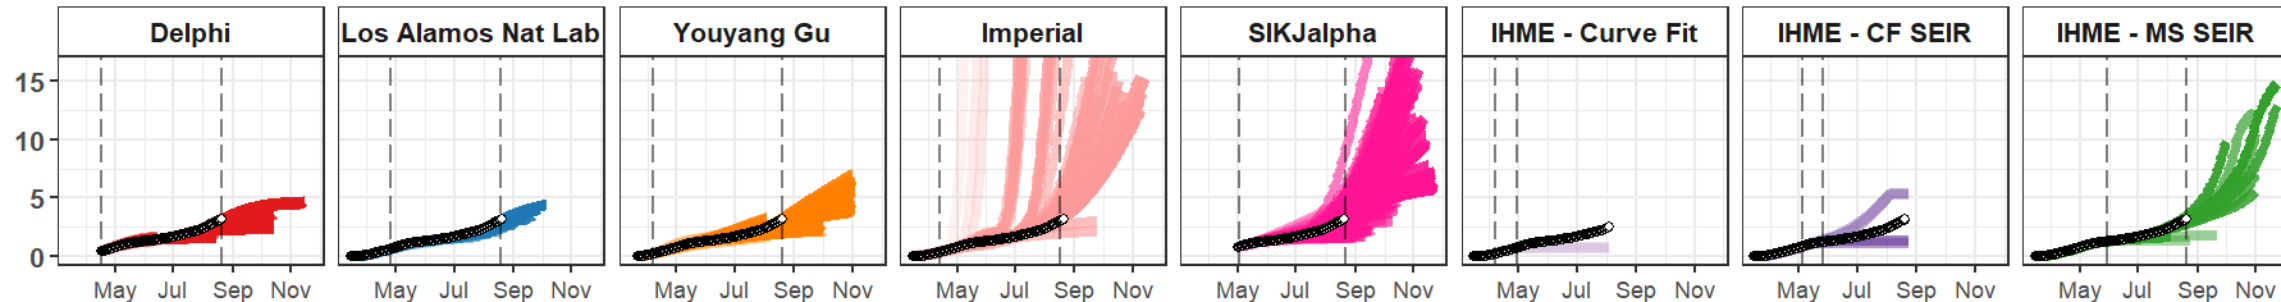

## All Cumulative Errors

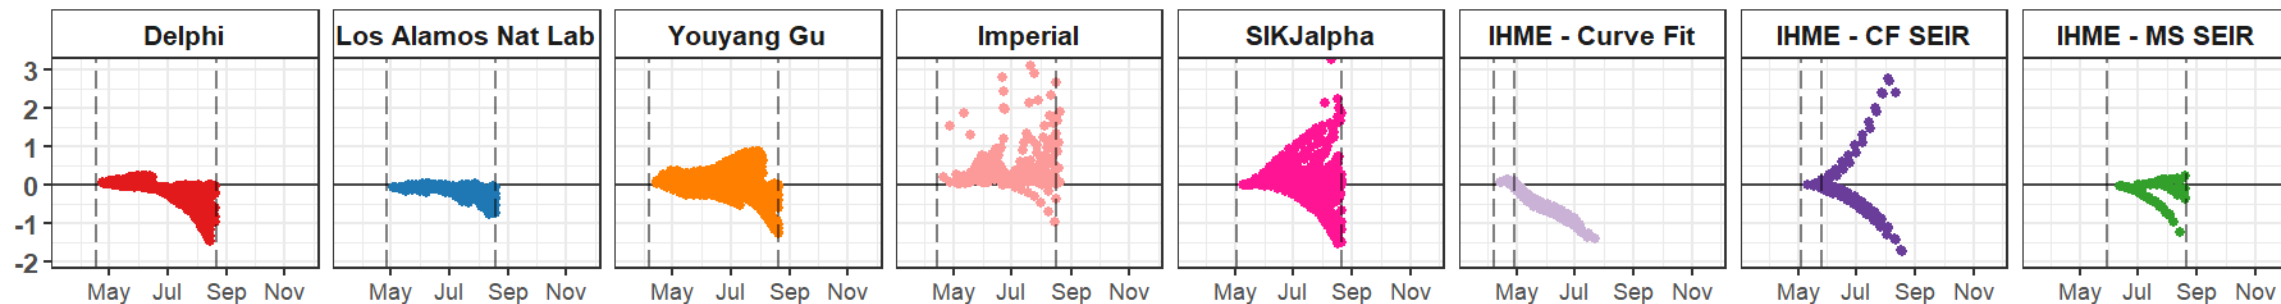

# Philippines

## Current Forecast

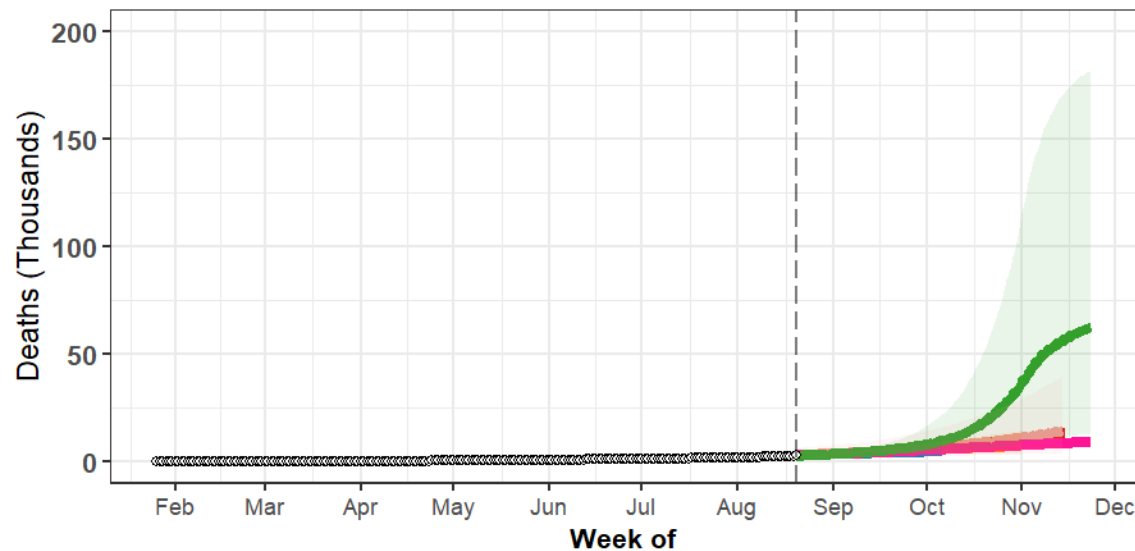

## Cumulative Out-Of-Sample Error (Post Intercept Shift)

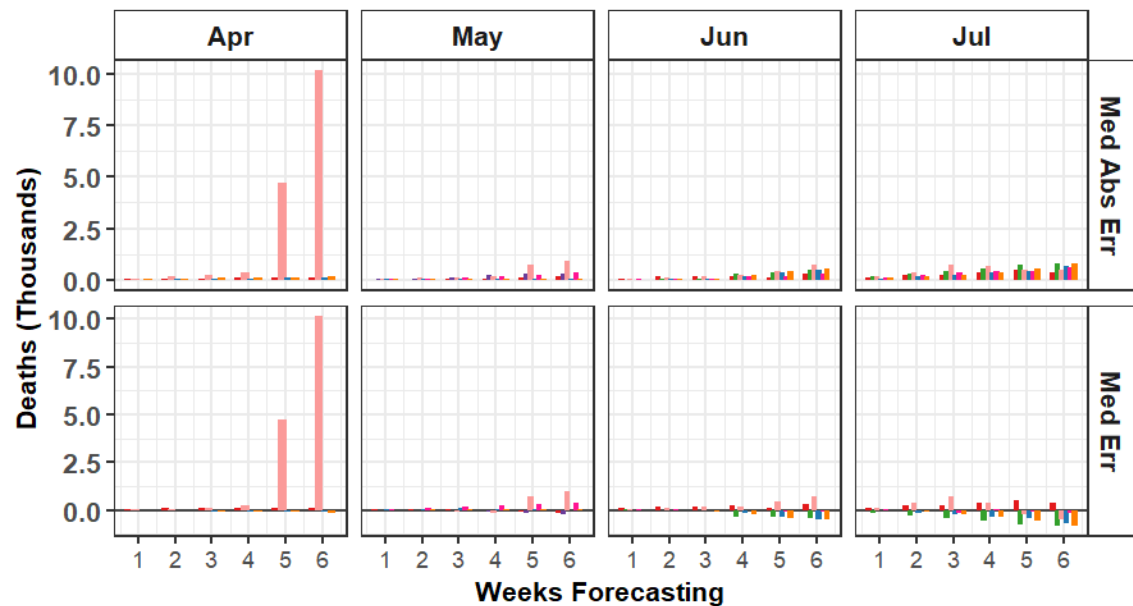

## All Model Versions

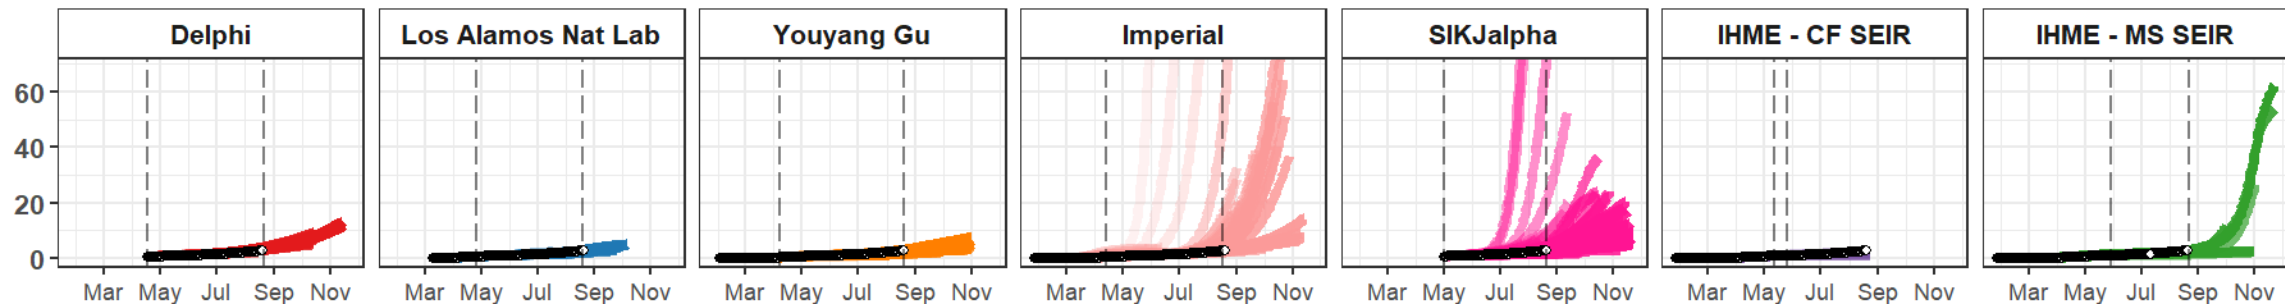

## All Cumulative Errors

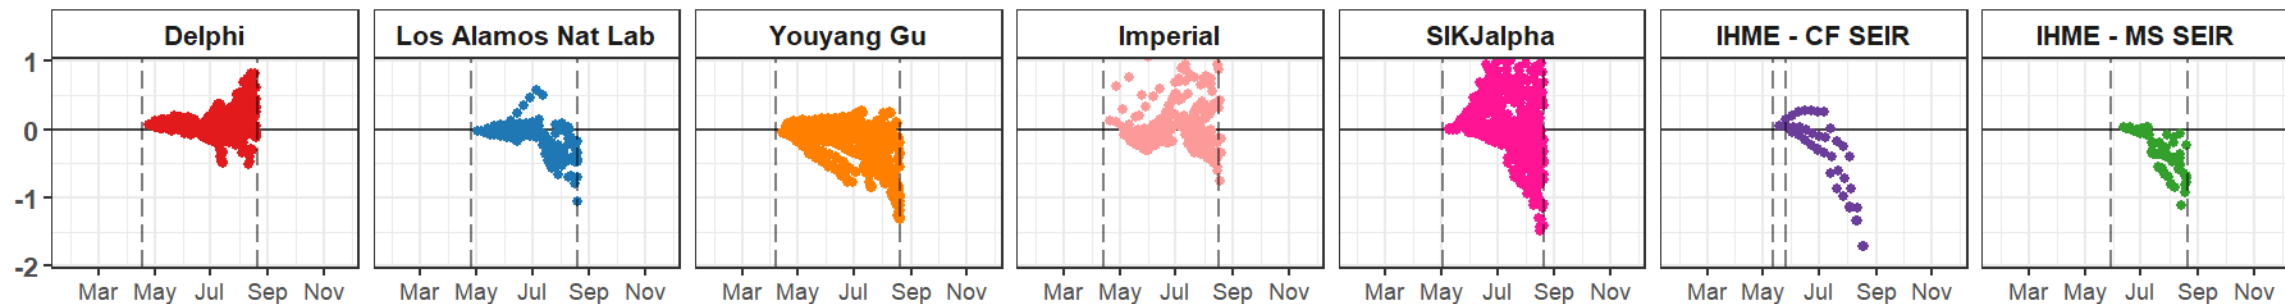

# Guatemala

## Current Forecast

Delphi Los Alamos Nat Lab Imperial SIKJalpha IHME - MS SEIR

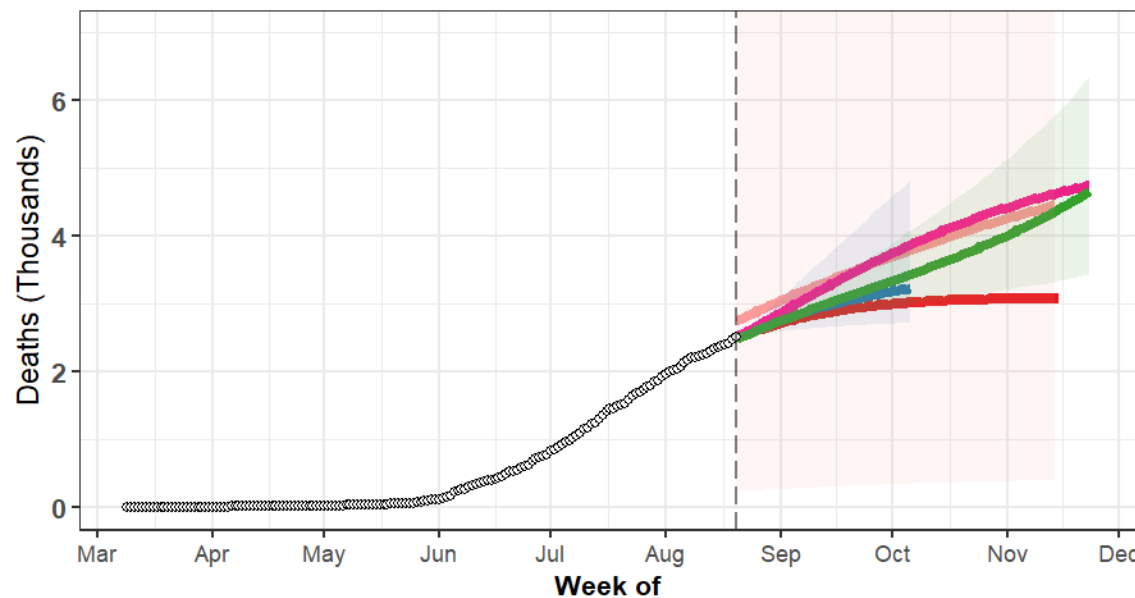

## Cumulative Out-Of-Sample Error (Post Intercept Shift)

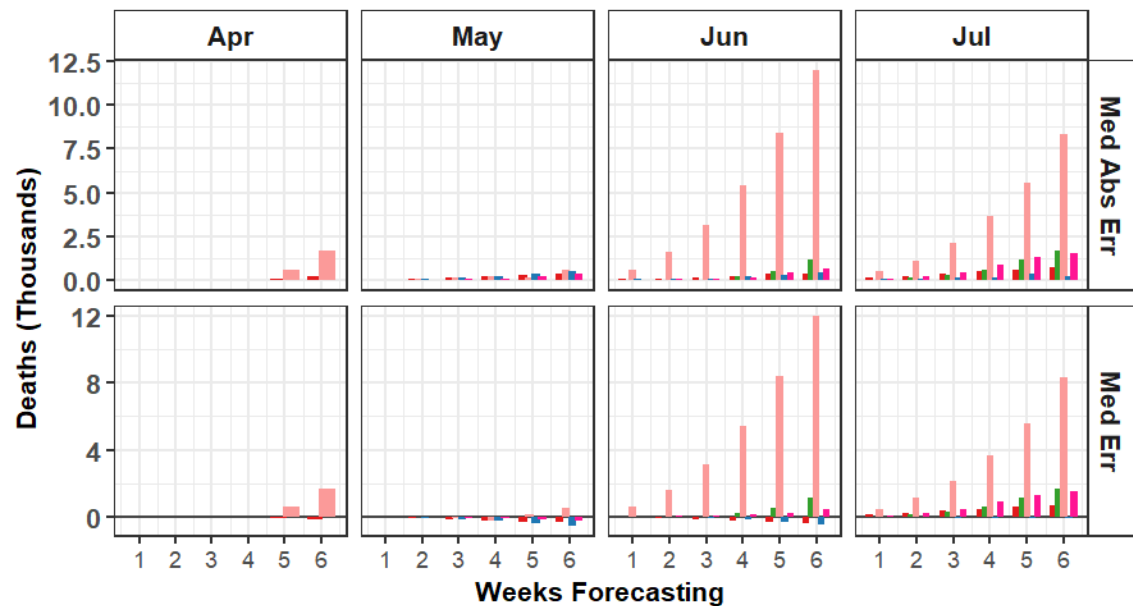

## All Model Versions

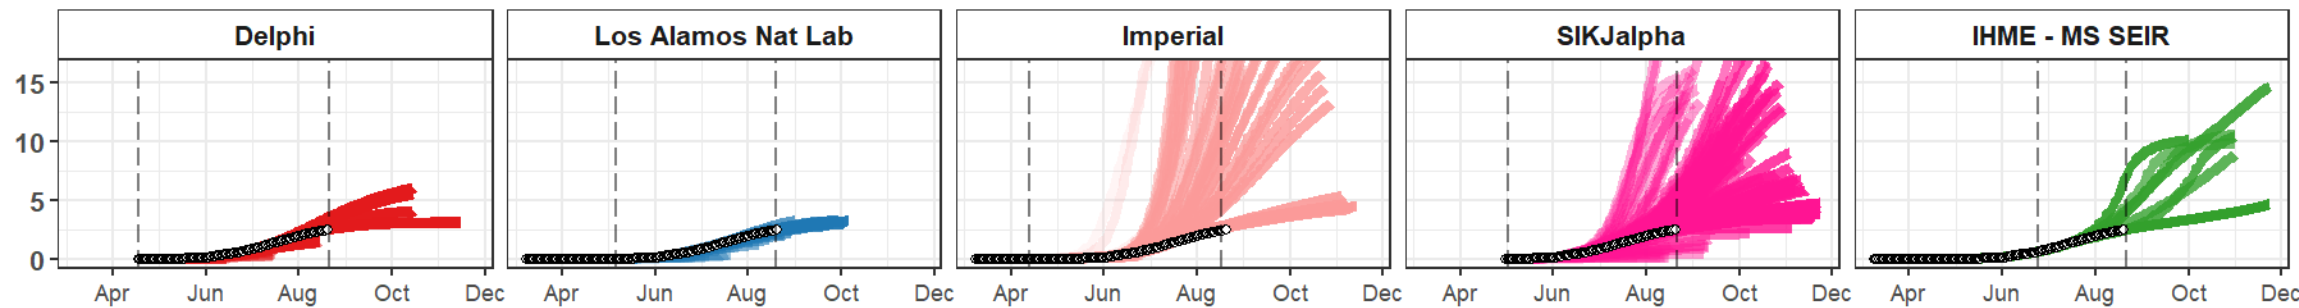

## All Cumulative Errors

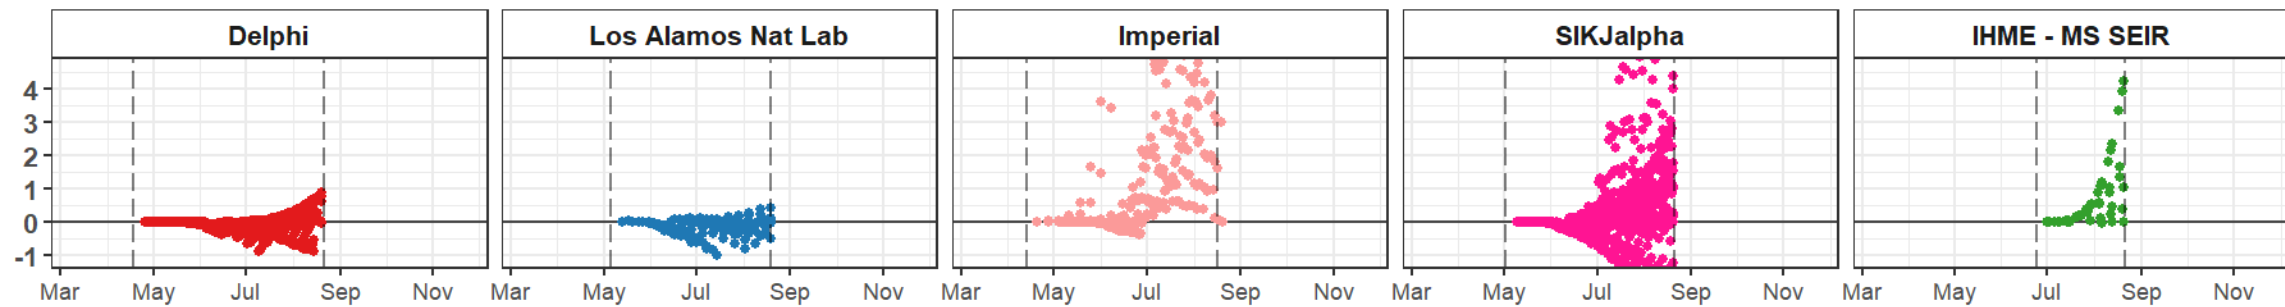

# North Carolina

## Current Forecast

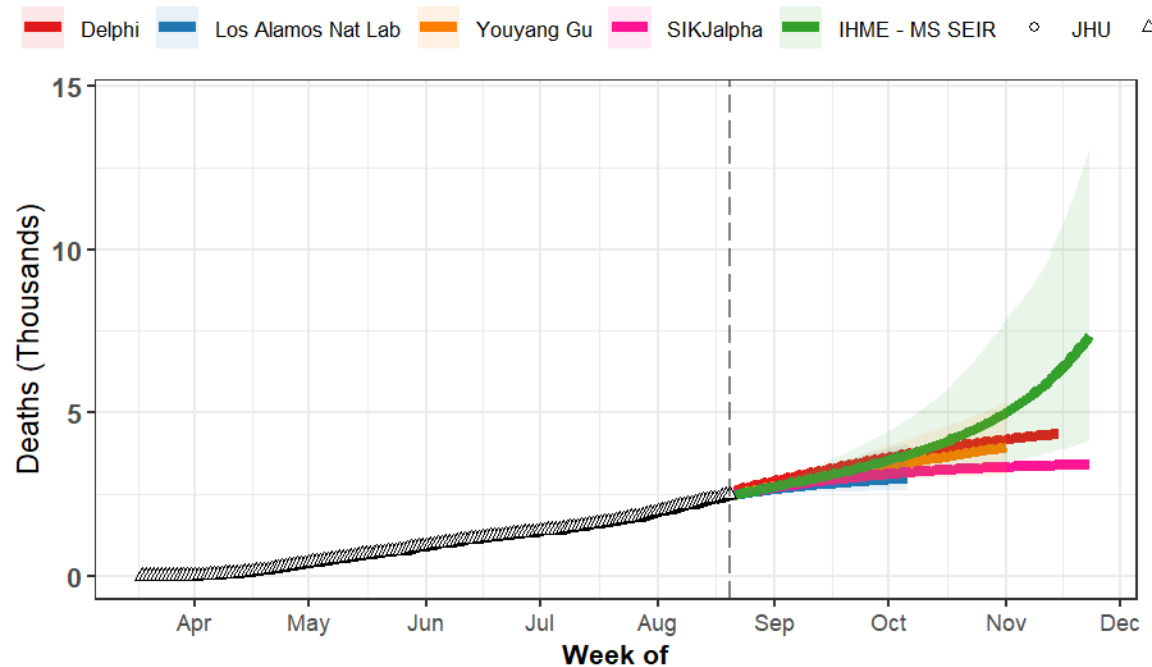

## Cumulative Out-Of-Sample Error (Post Intercept Shift)

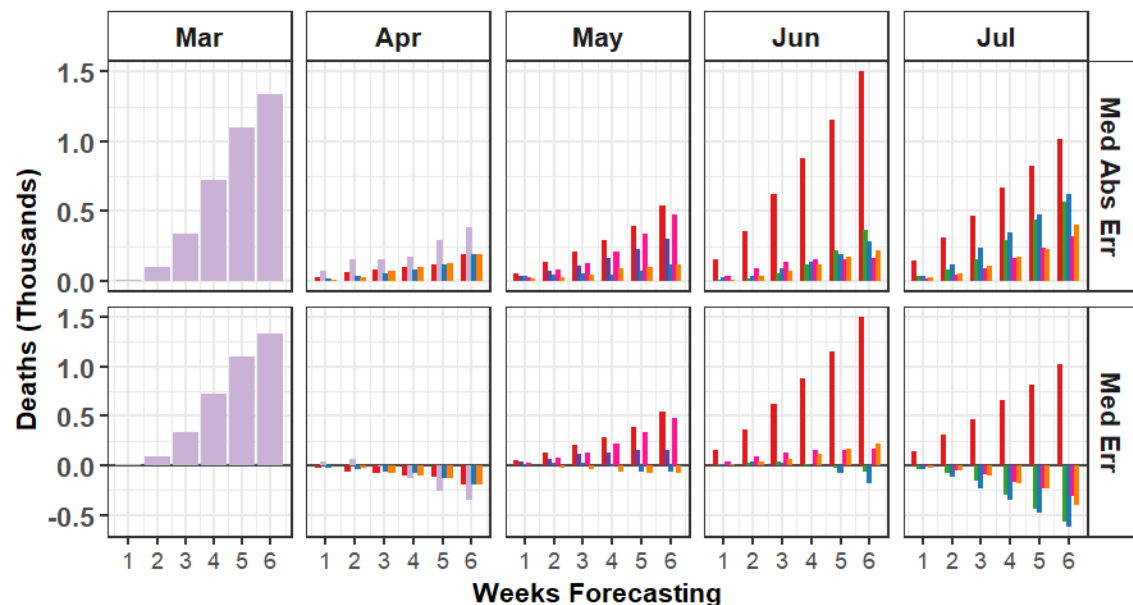

## All Model Versions

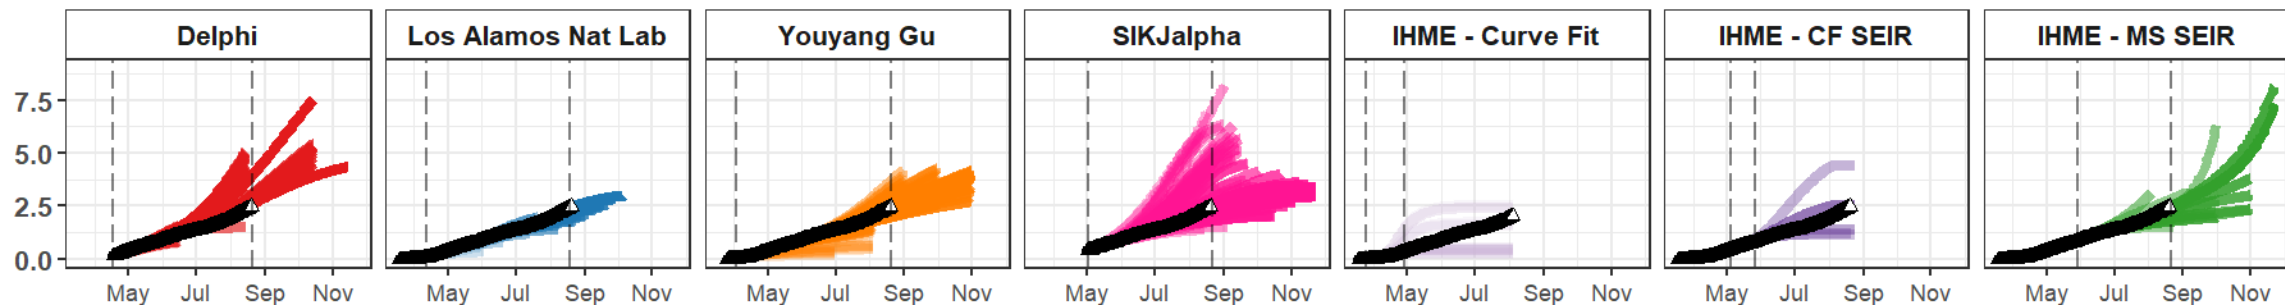

## All Cumulative Errors

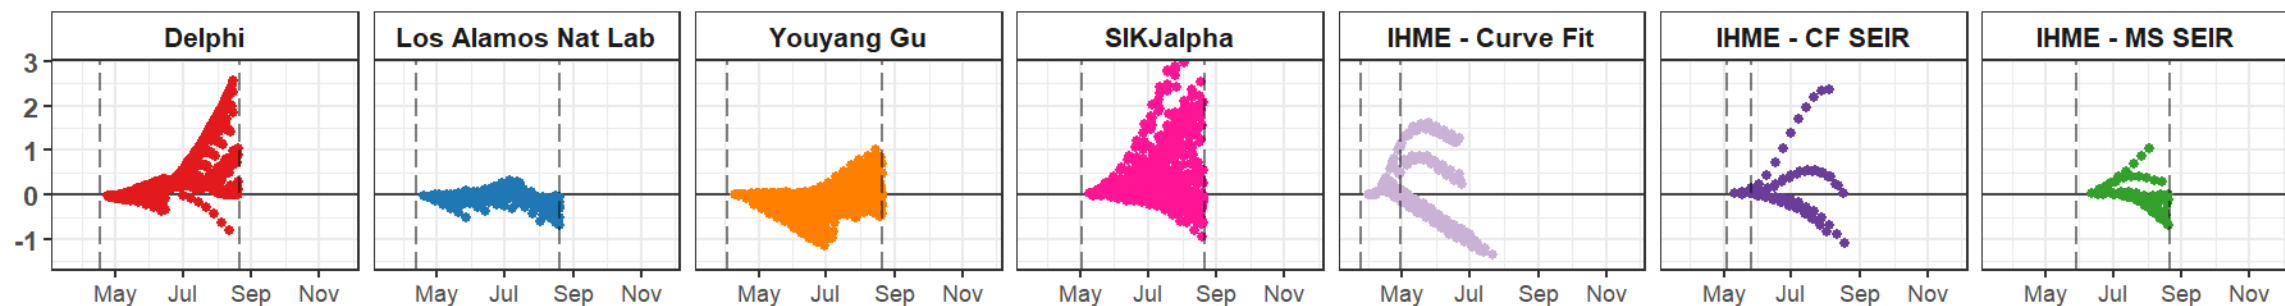



# Virginia

## Current Forecast

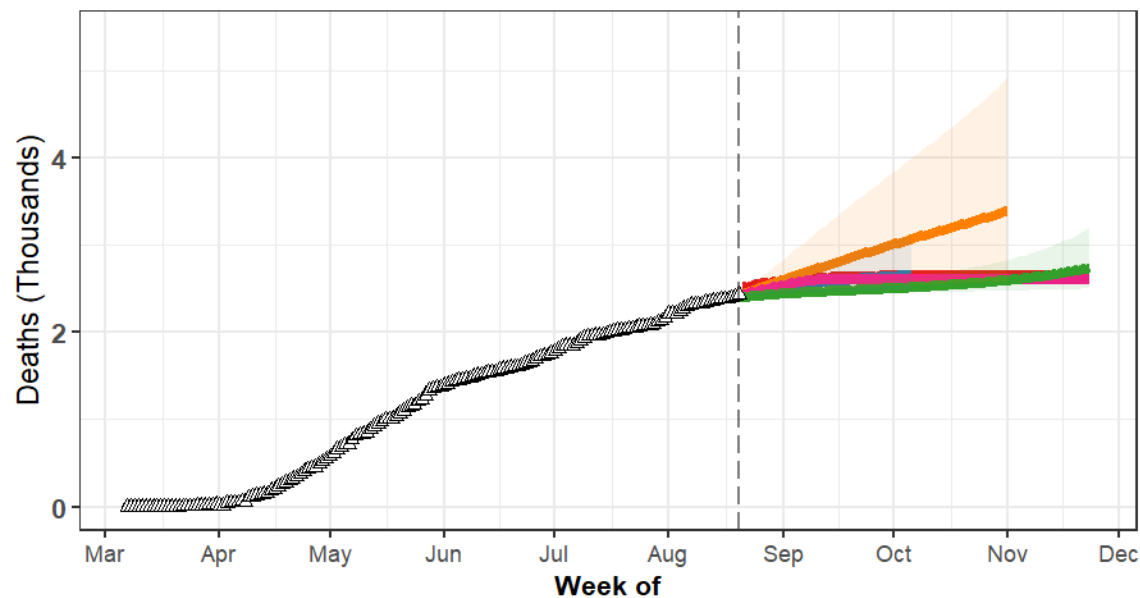

## Cumulative Out-Of-Sample Error (Post Intercept Shift)

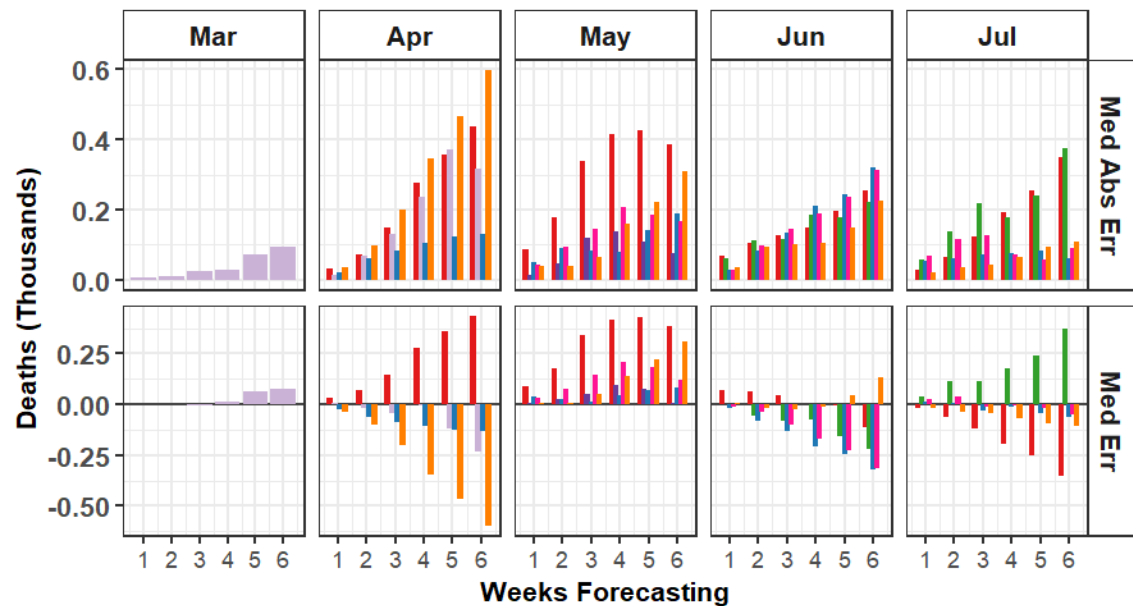

## All Model Versions

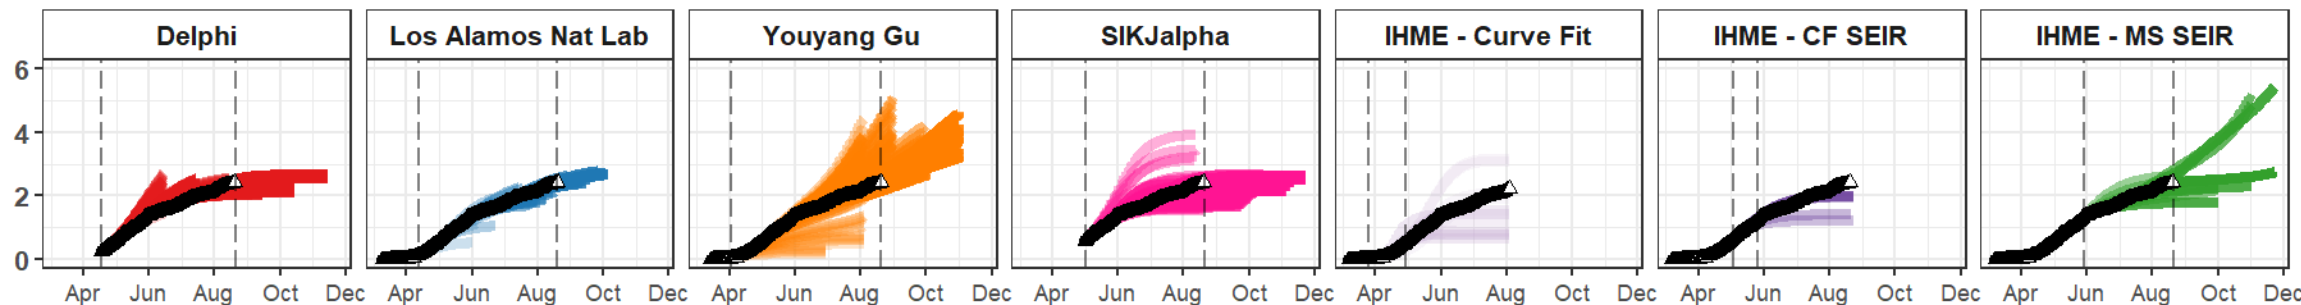

## All Cumulative Errors

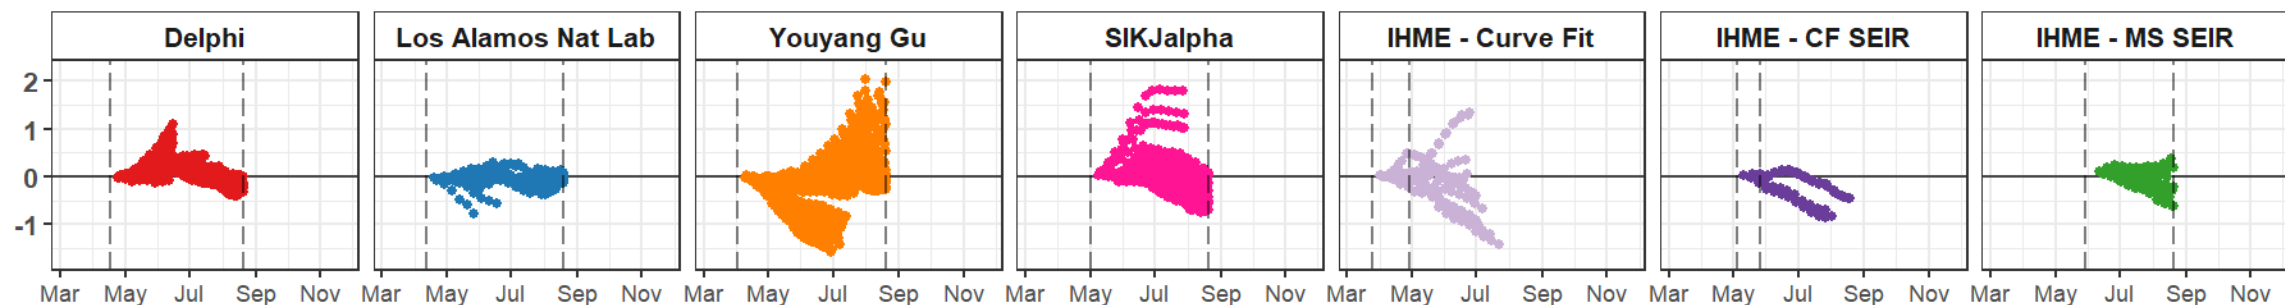

# South Carolina

## Current Forecast

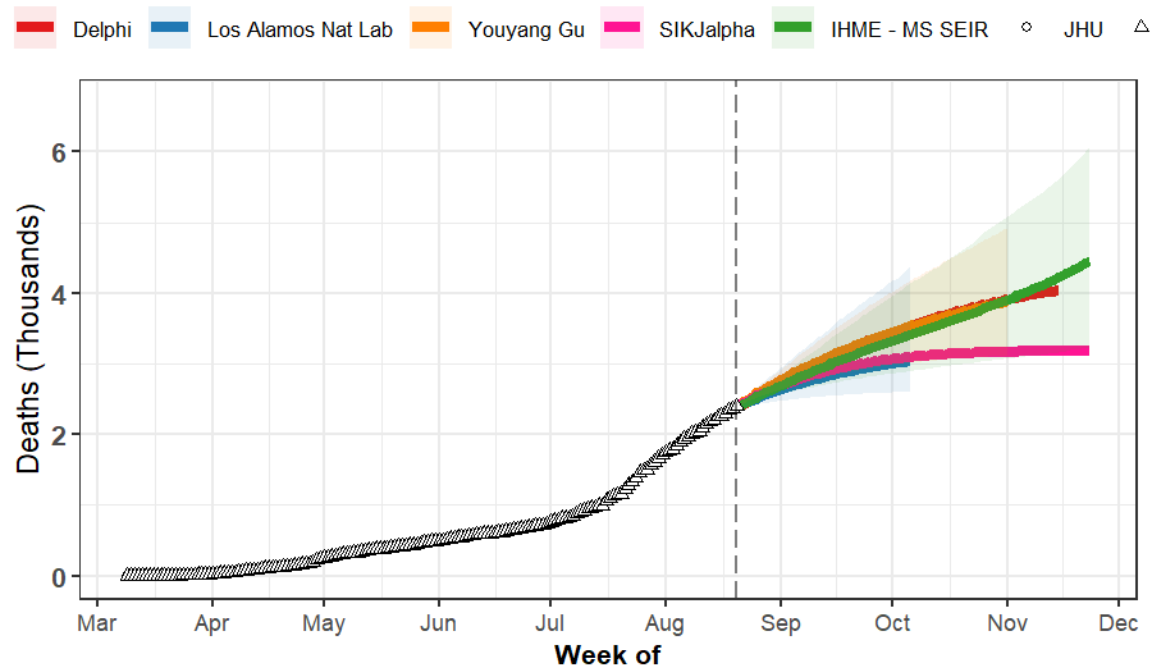

## Cumulative Out-Of-Sample Error (Post Intercept Shift)

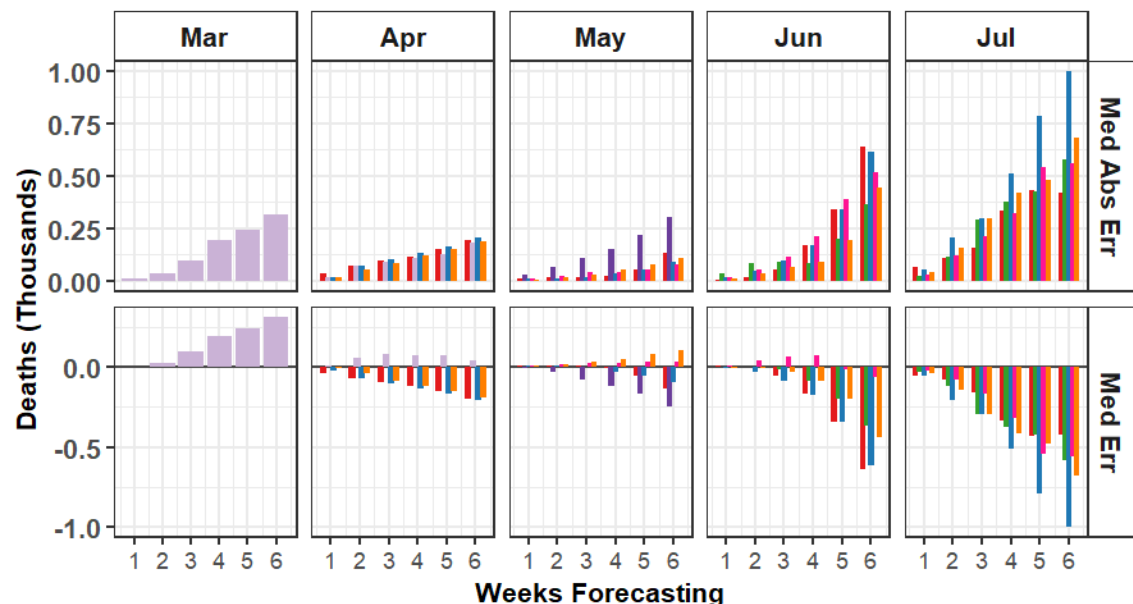

## All Model Versions

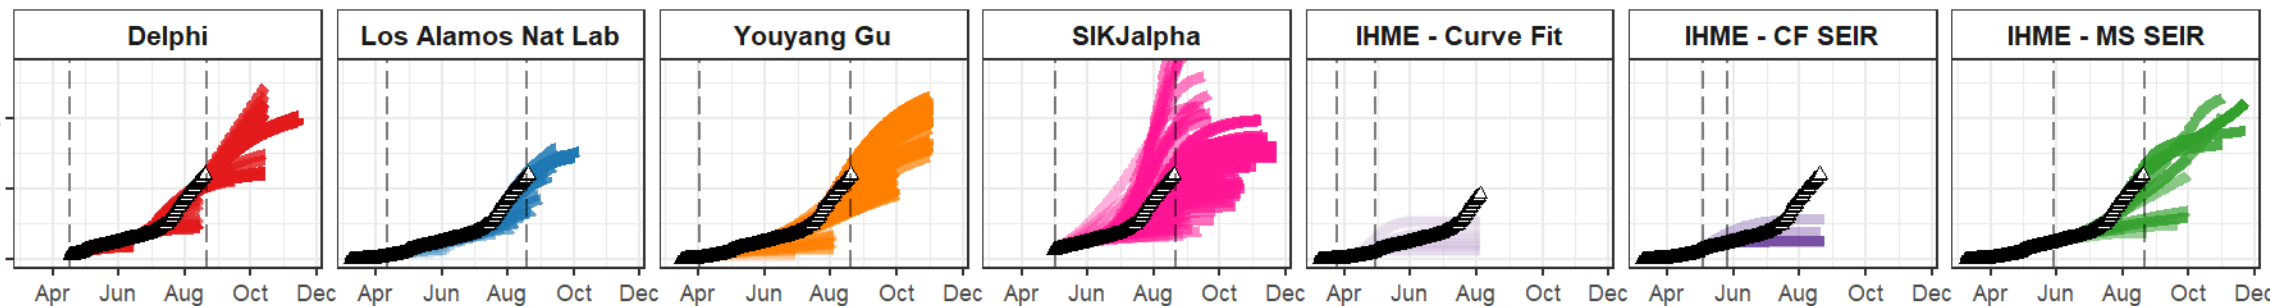

## All Cumulative Errors

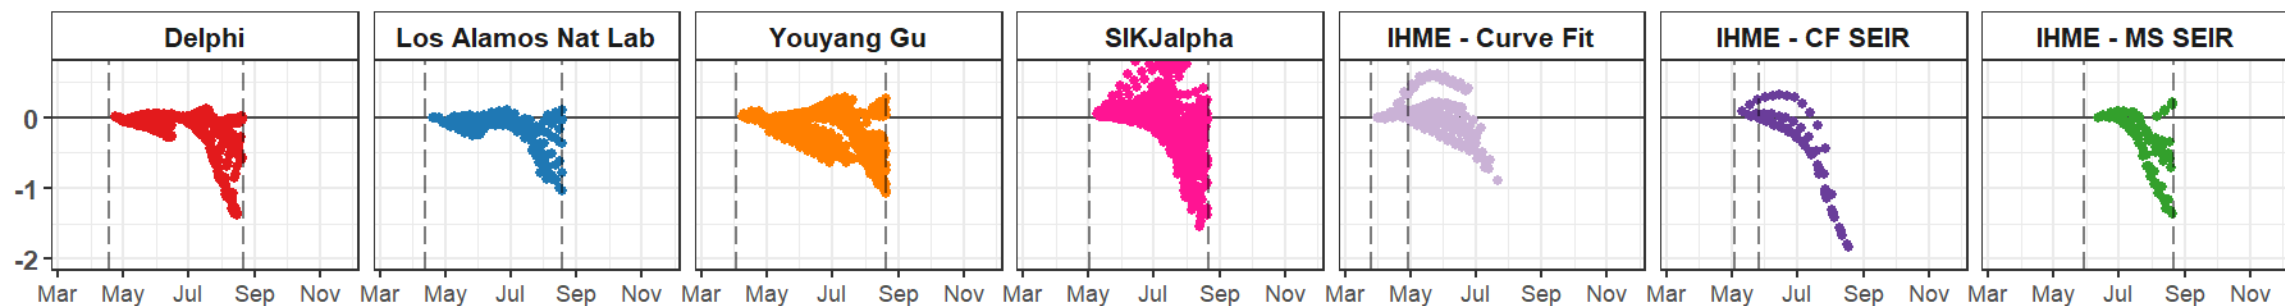

# Ukraine

## Current Forecast

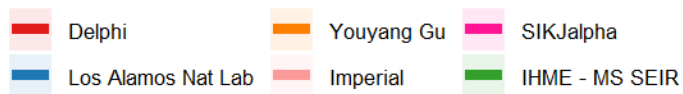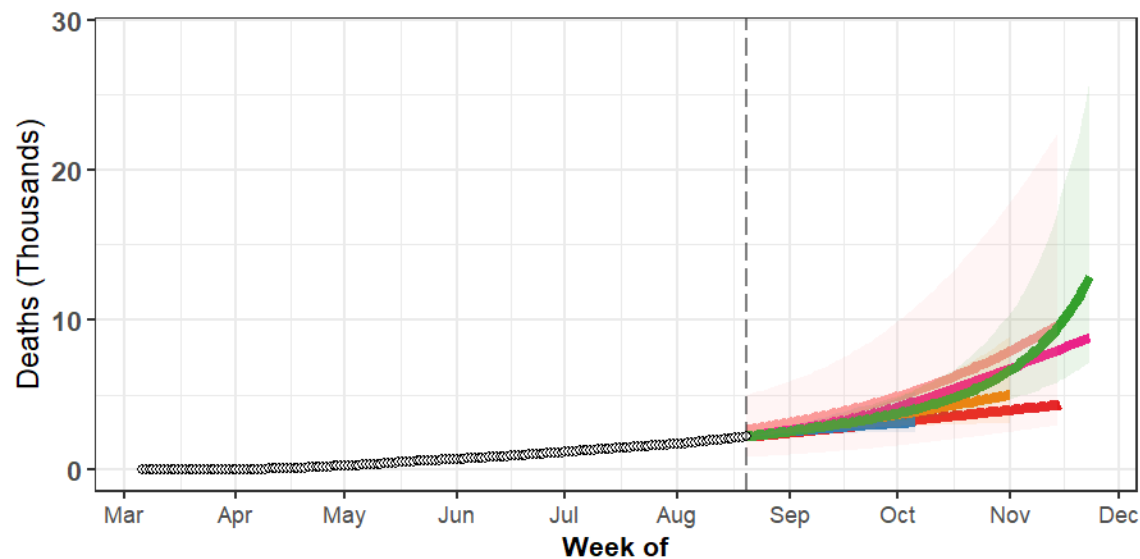

## Cumulative Out-Of-Sample Error (Post Intercept Shift)

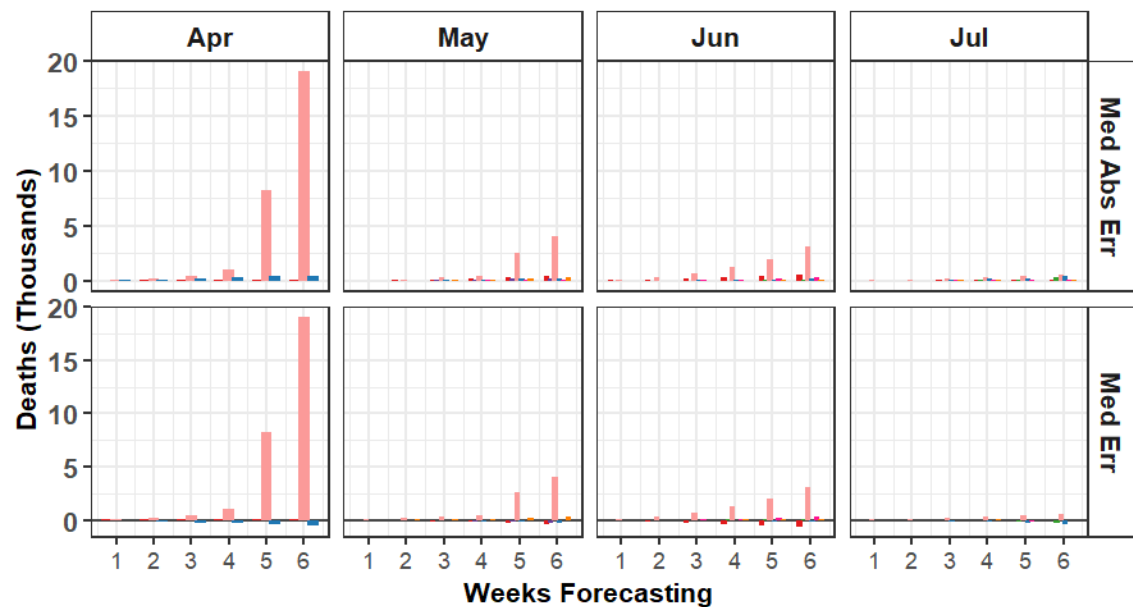

## All Model Versions

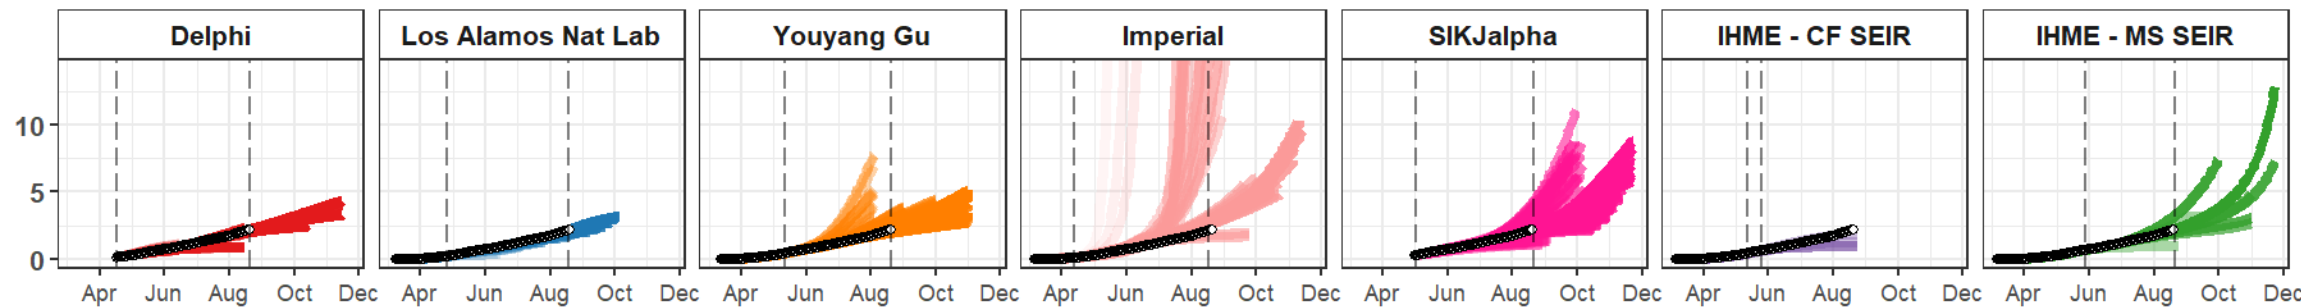

## All Cumulative Errors

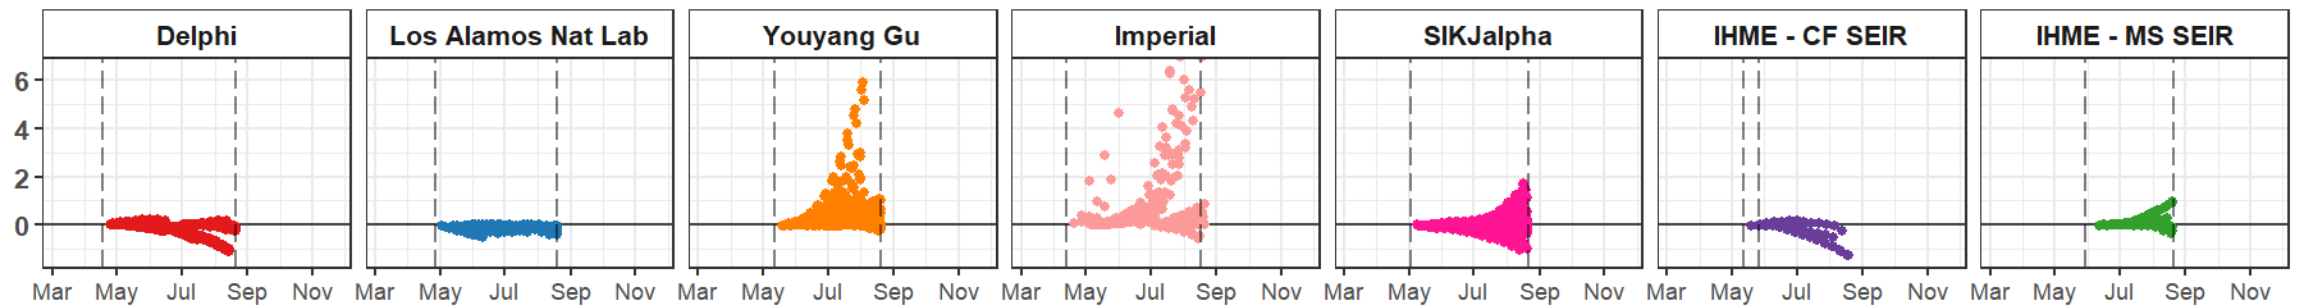

# Mississippi

## Current Forecast

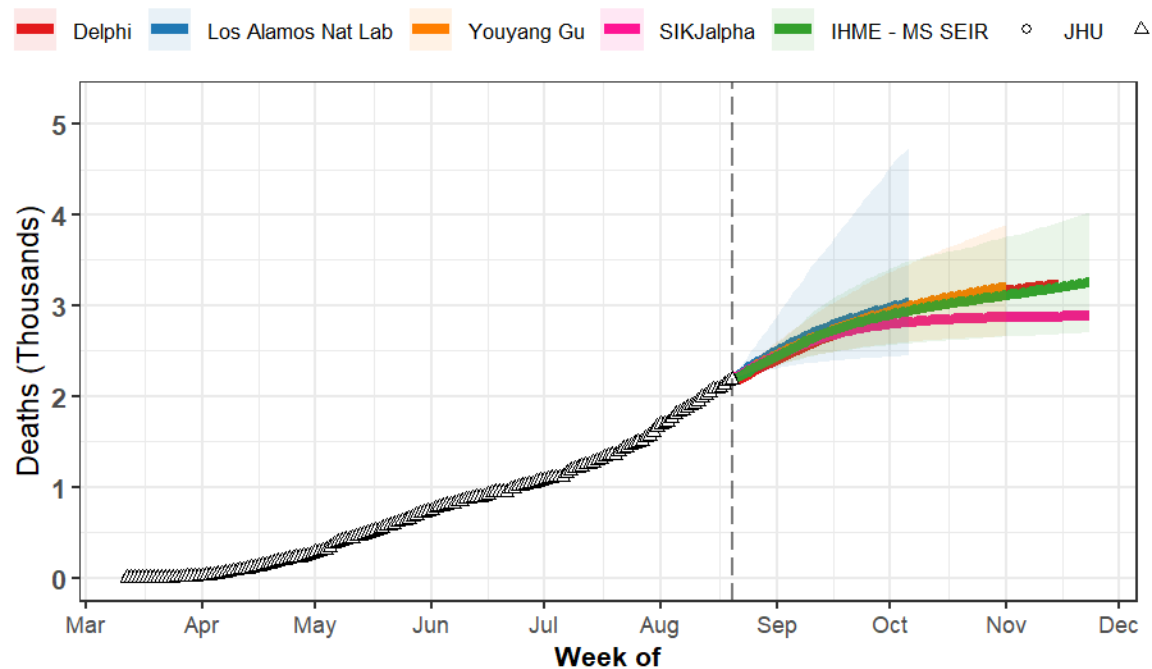

## Cumulative Out-Of-Sample Error (Post Intercept Shift)

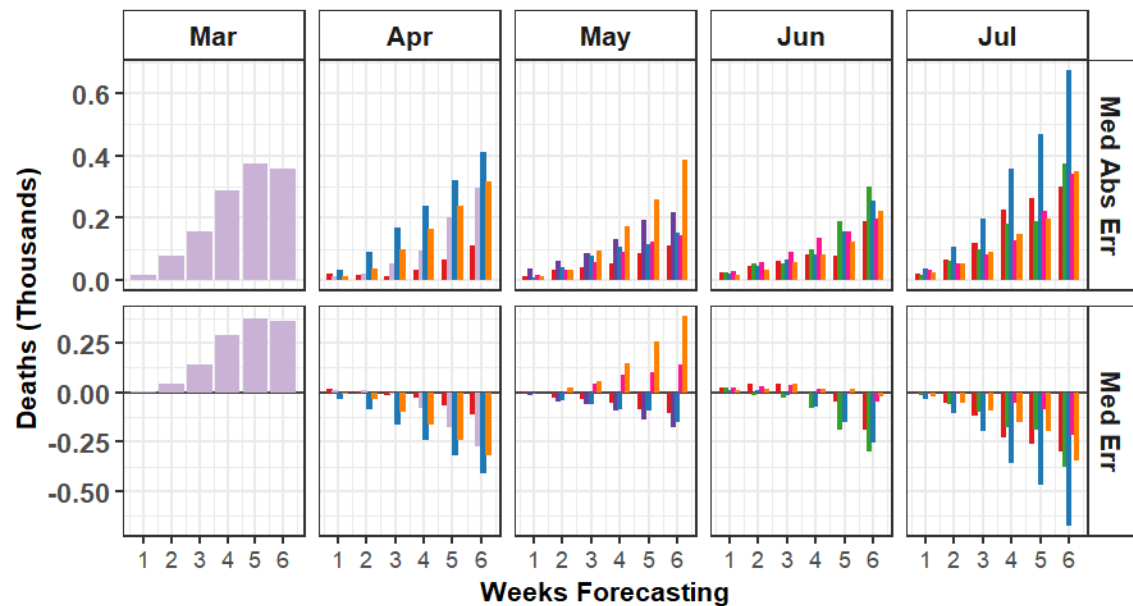

## All Model Versions

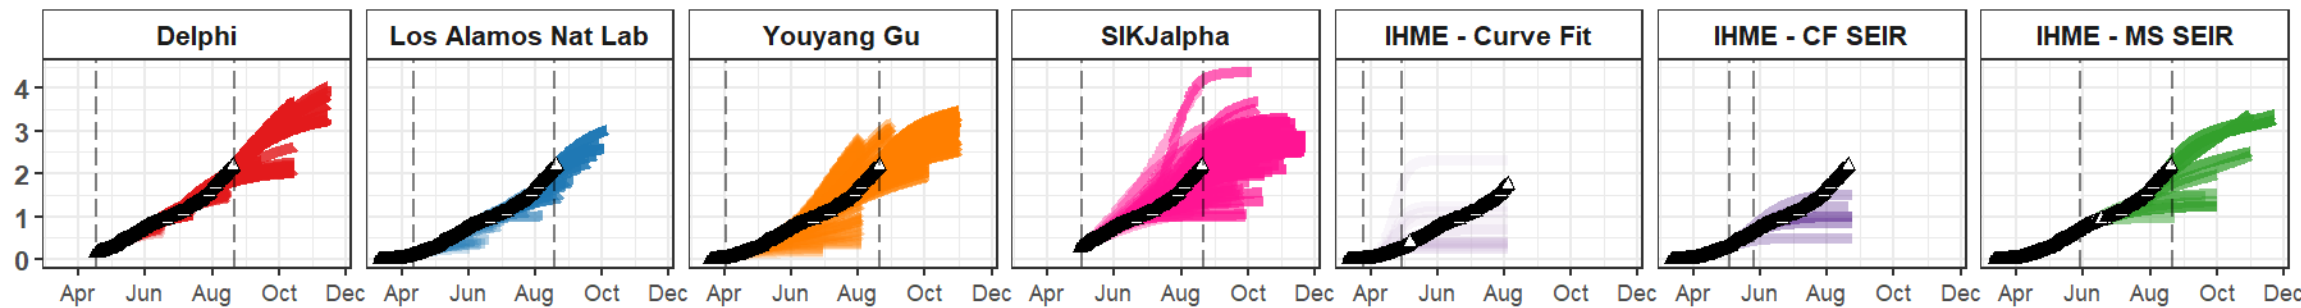

## All Cumulative Errors

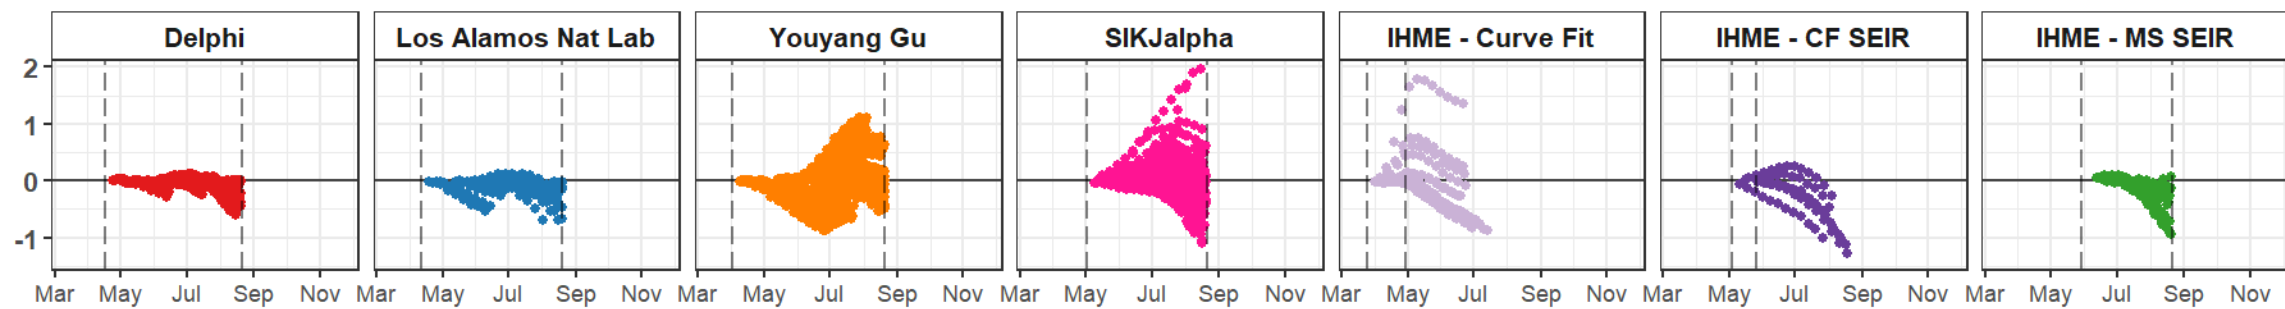

# Switzerland

## Current Forecast

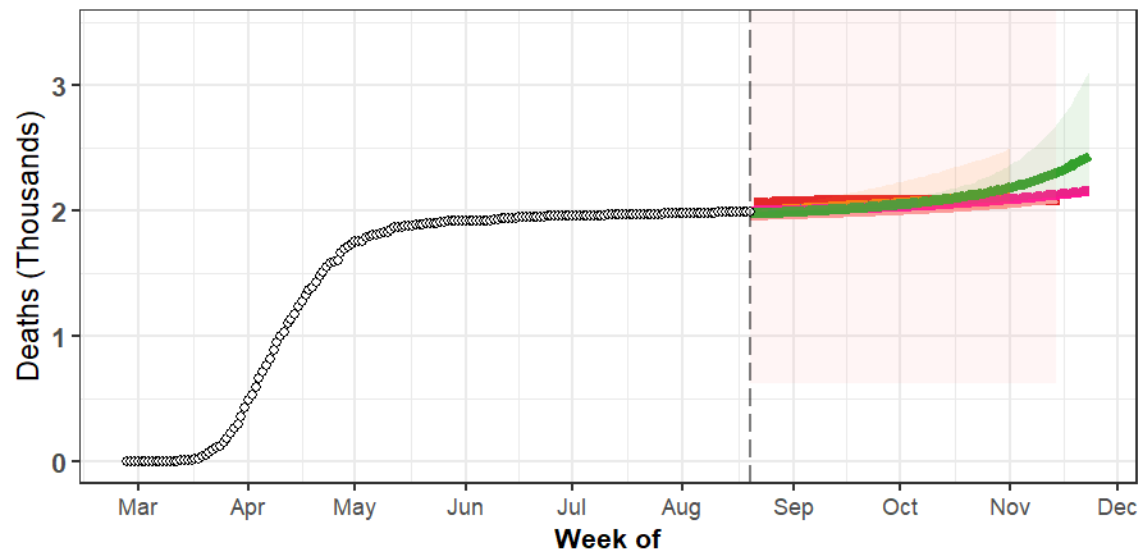

## Cumulative Out-Of-Sample Error (Post Intercept Shift)

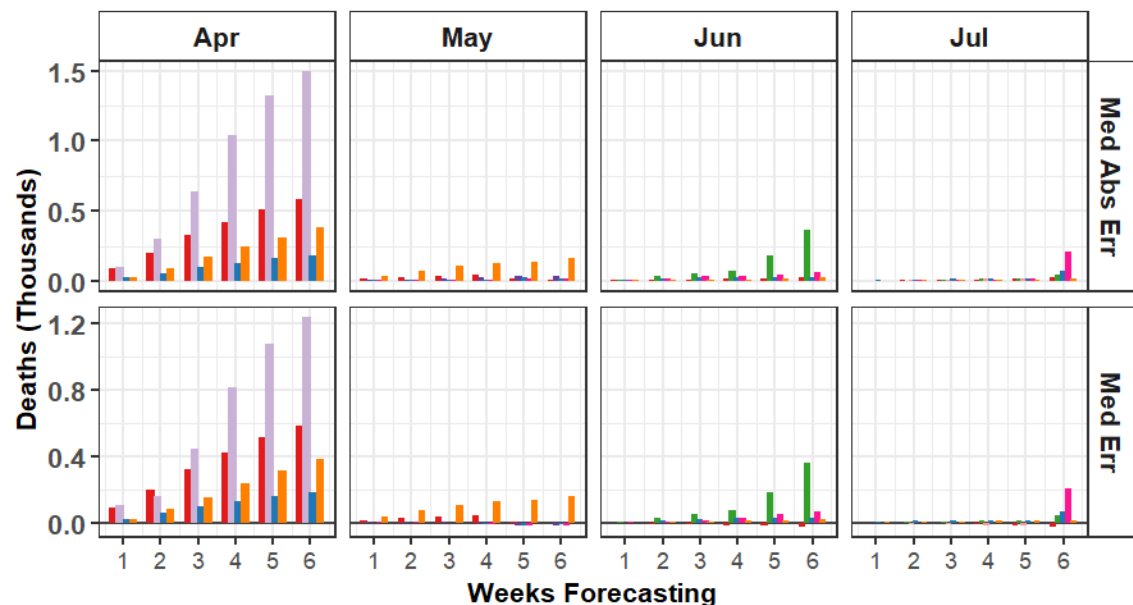

## All Model Versions

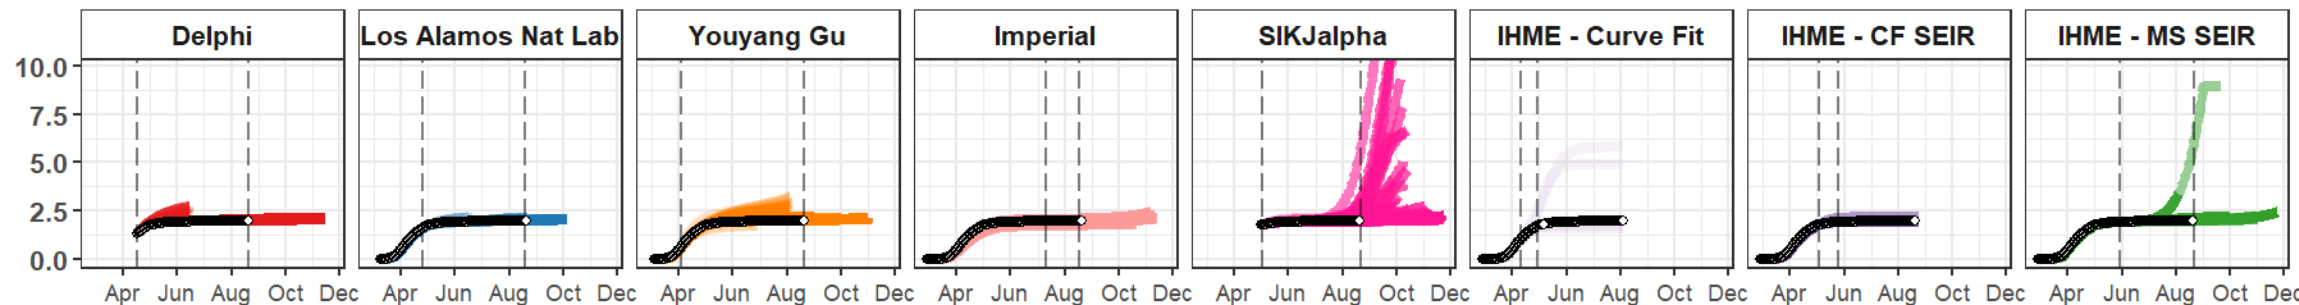

## All Cumulative Errors

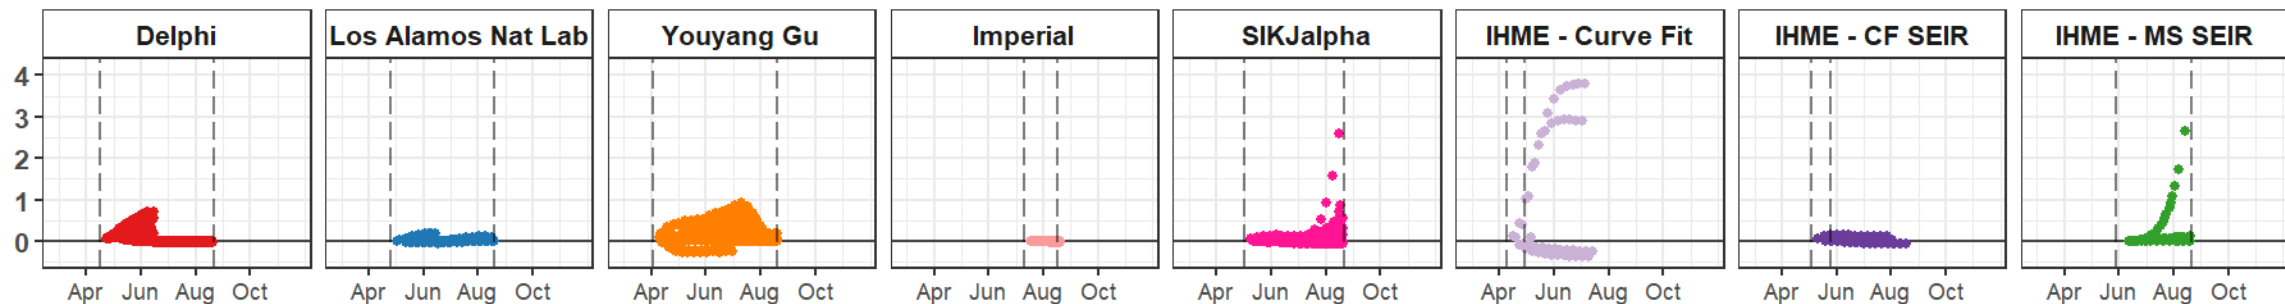

# Alabama

## Current Forecast

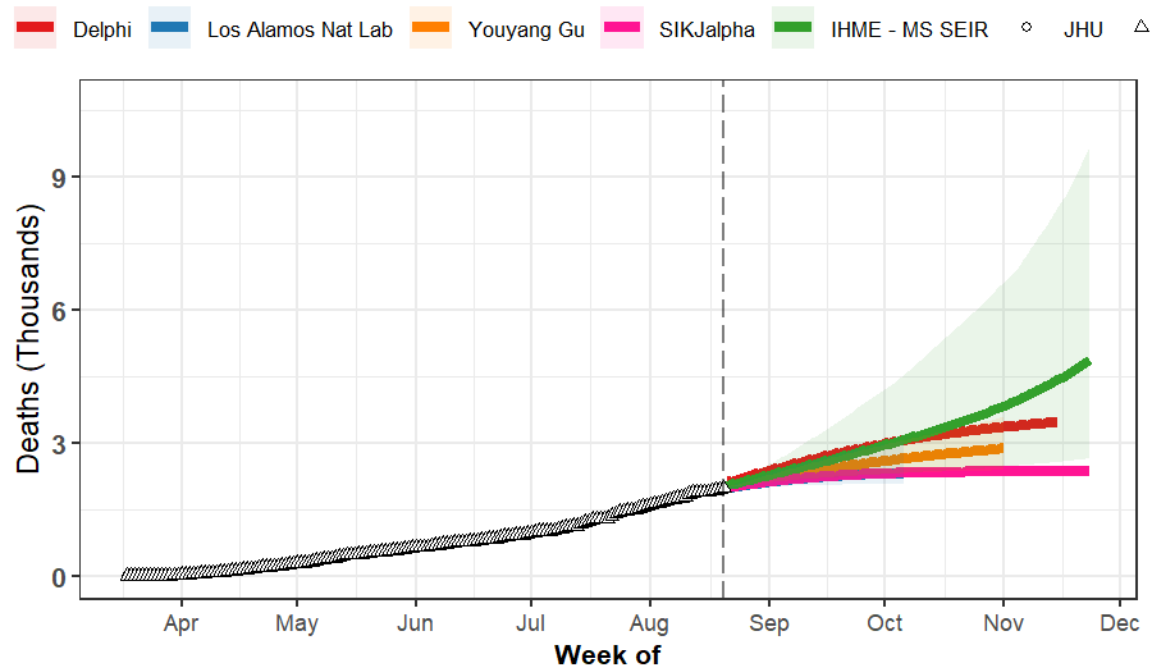

## Cumulative Out-Of-Sample Error (Post Intercept Shift)

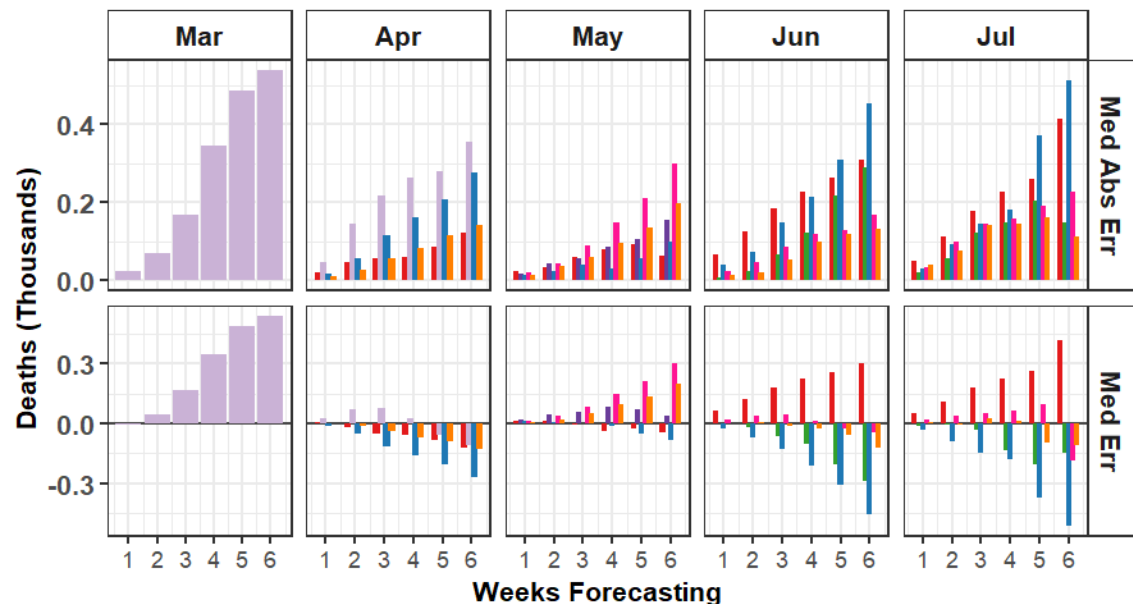

## All Model Versions

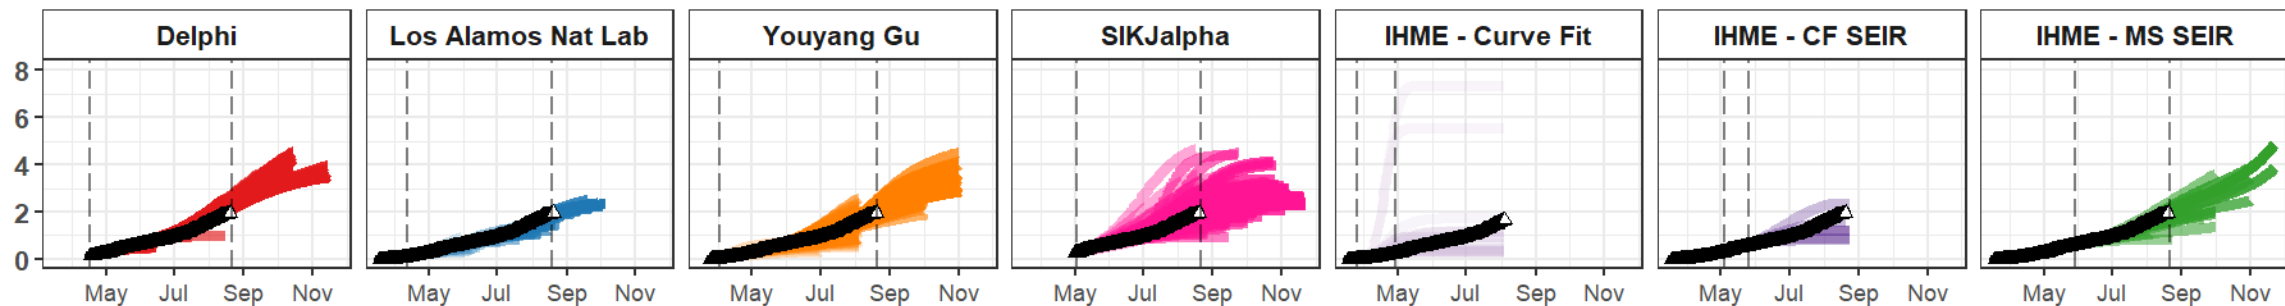

## All Cumulative Errors

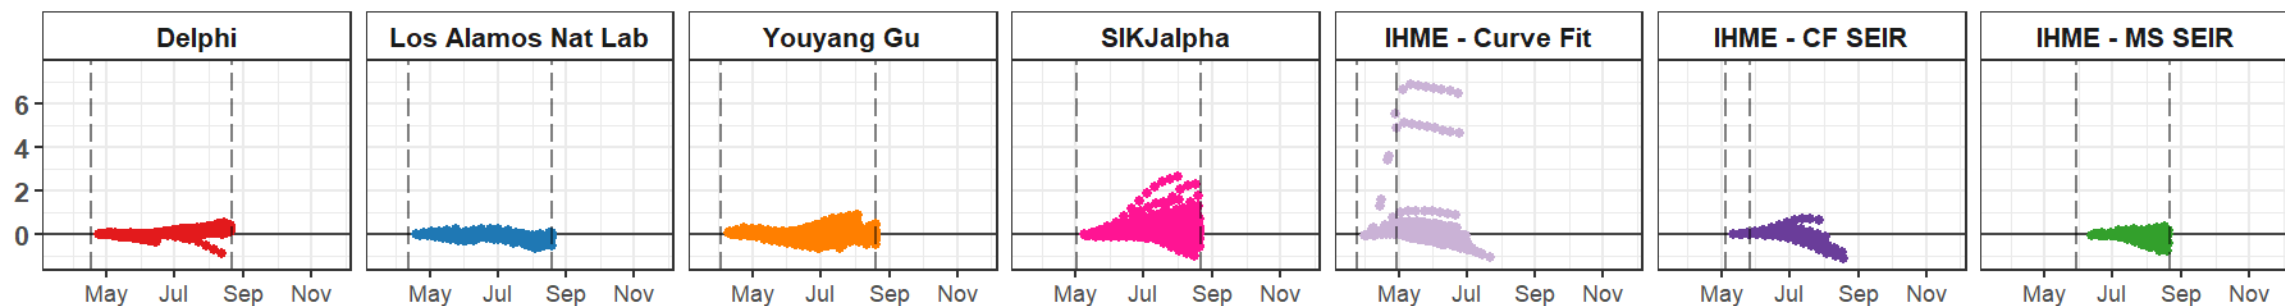

# Poland

## Current Forecast

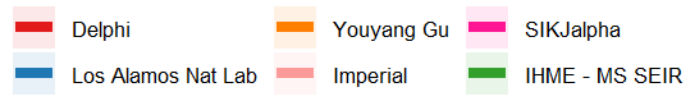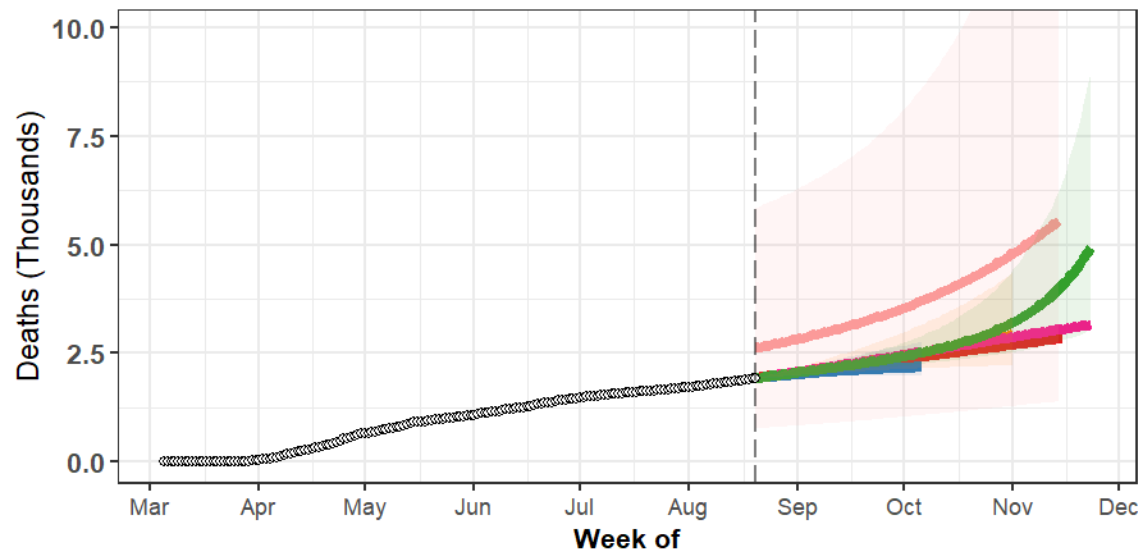

## Cumulative Out-Of-Sample Error (Post Intercept Shift)

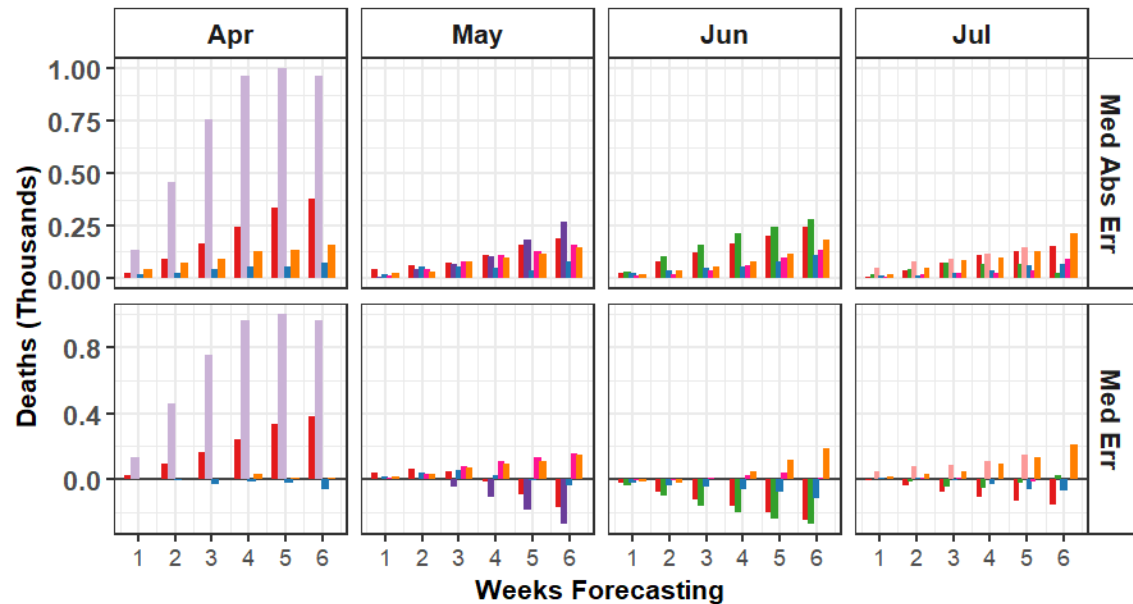

## All Model Versions

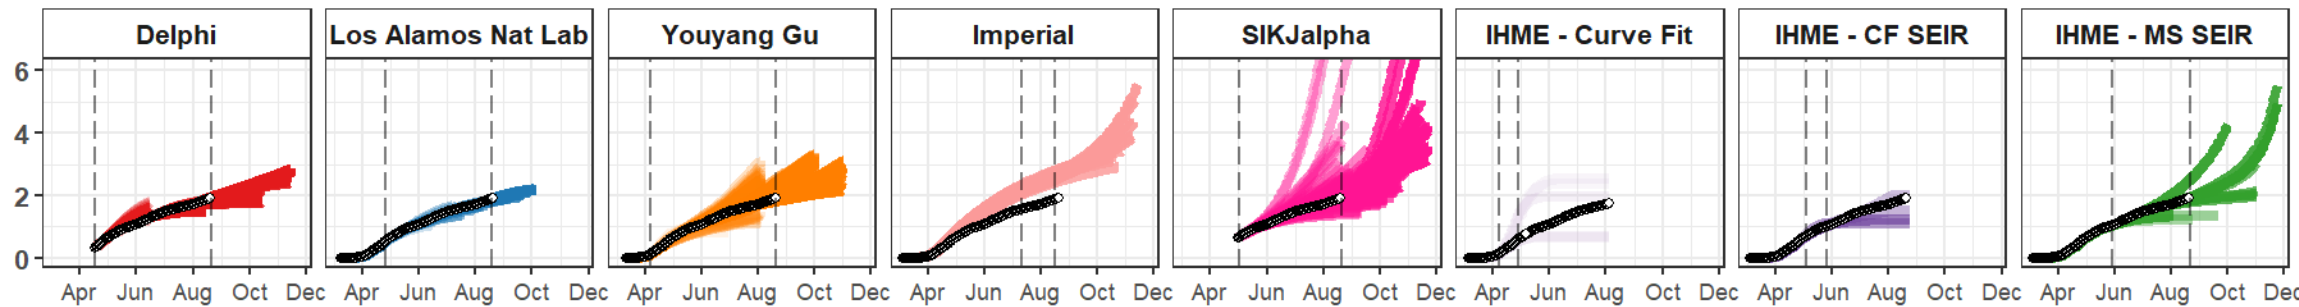

## All Cumulative Errors

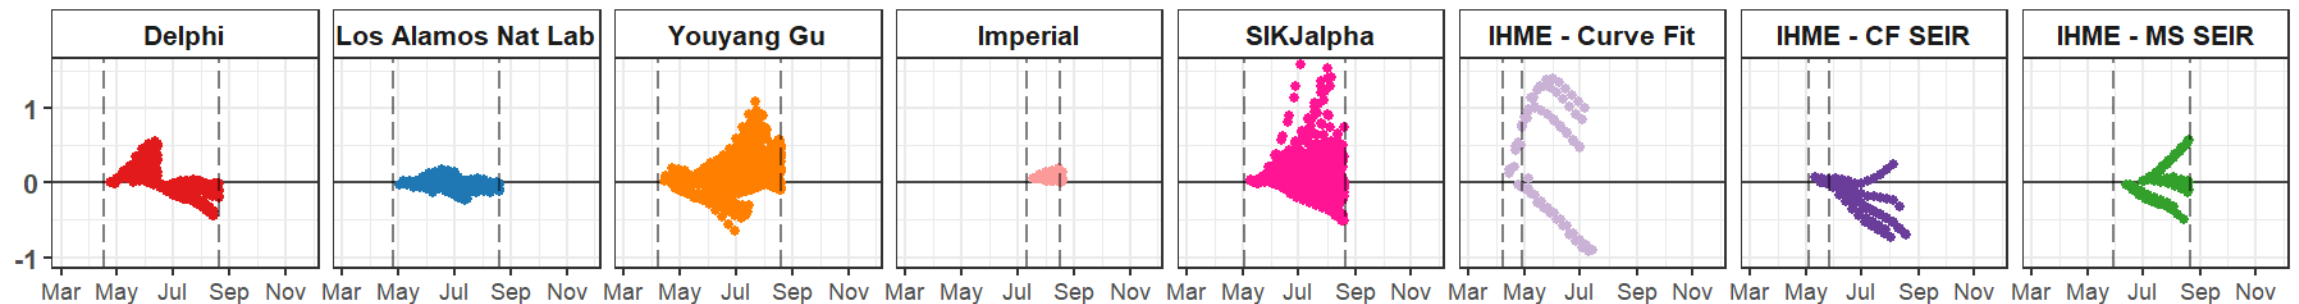

# Washington

## Current Forecast

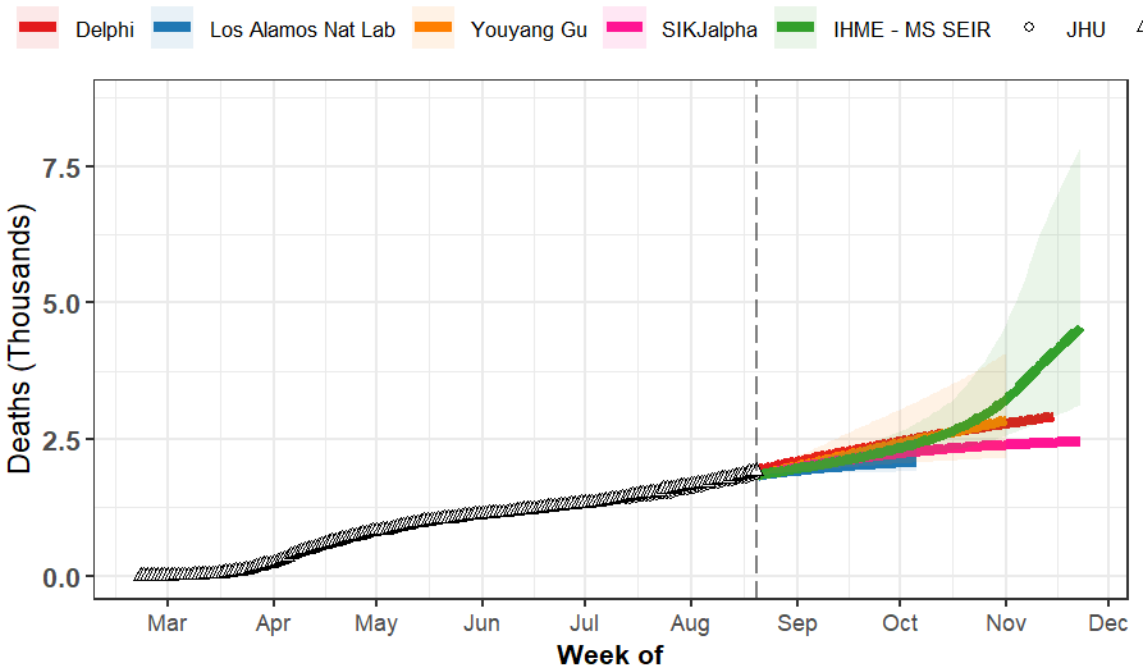

## Cumulative Out-Of-Sample Error (Post Intercept Shift)

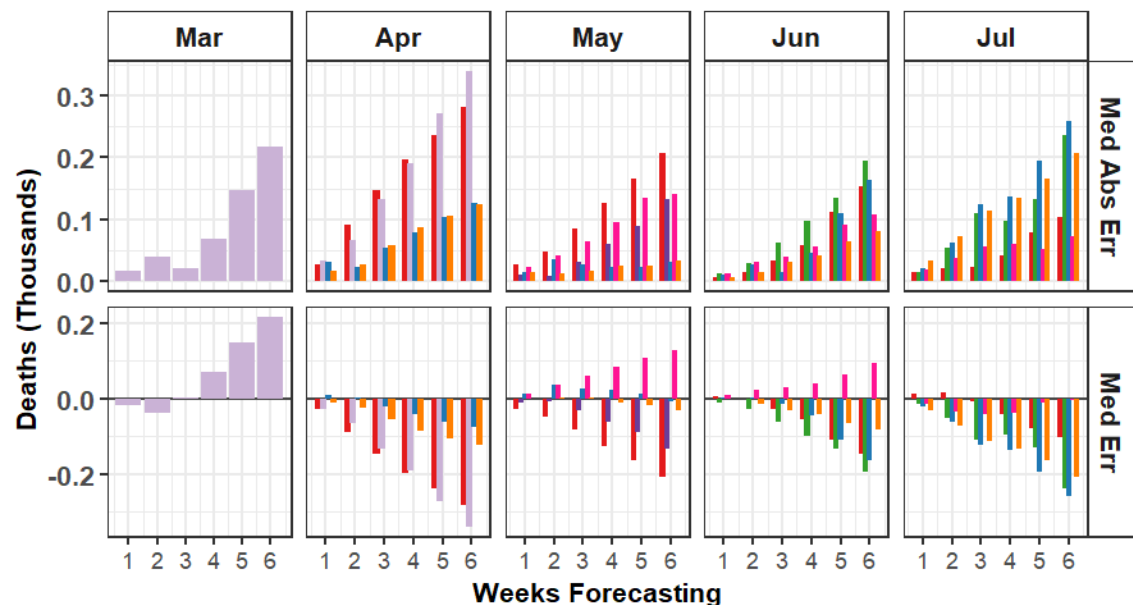

## All Model Versions

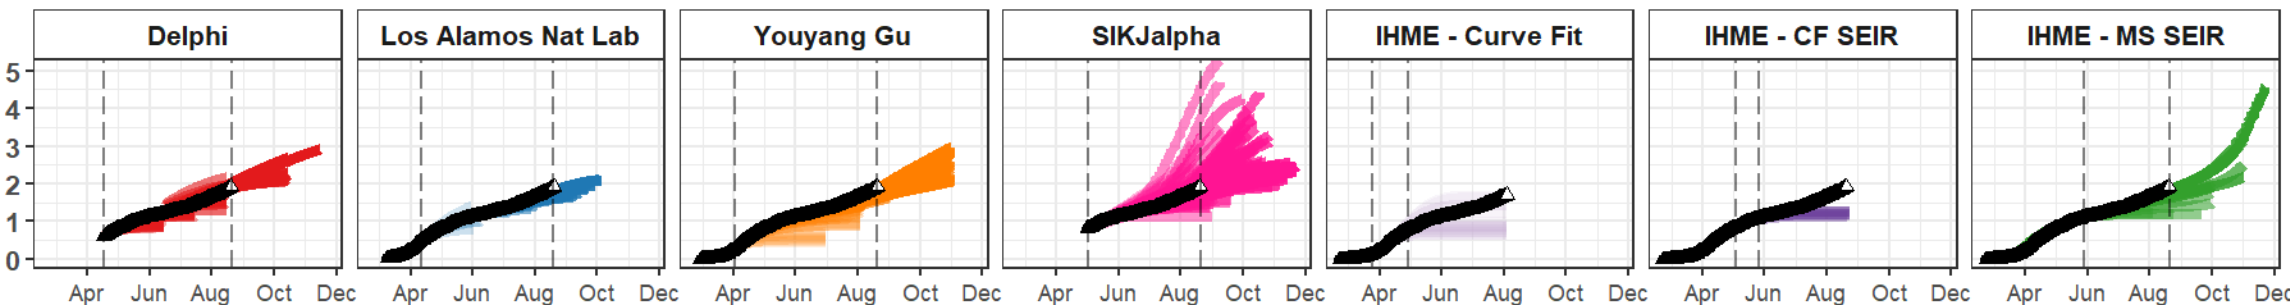

## All Cumulative Errors

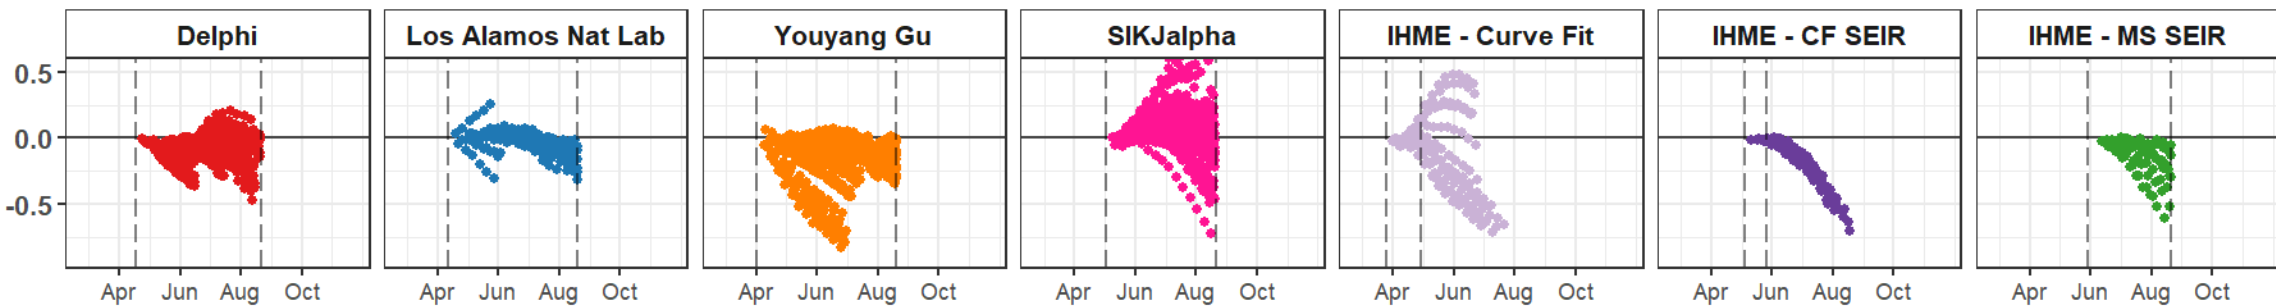



# Colorado

## Current Forecast

Delphi Los Alamos Nat Lab Youyang Gu SIKJalpha IHME - MS SEIR JHU

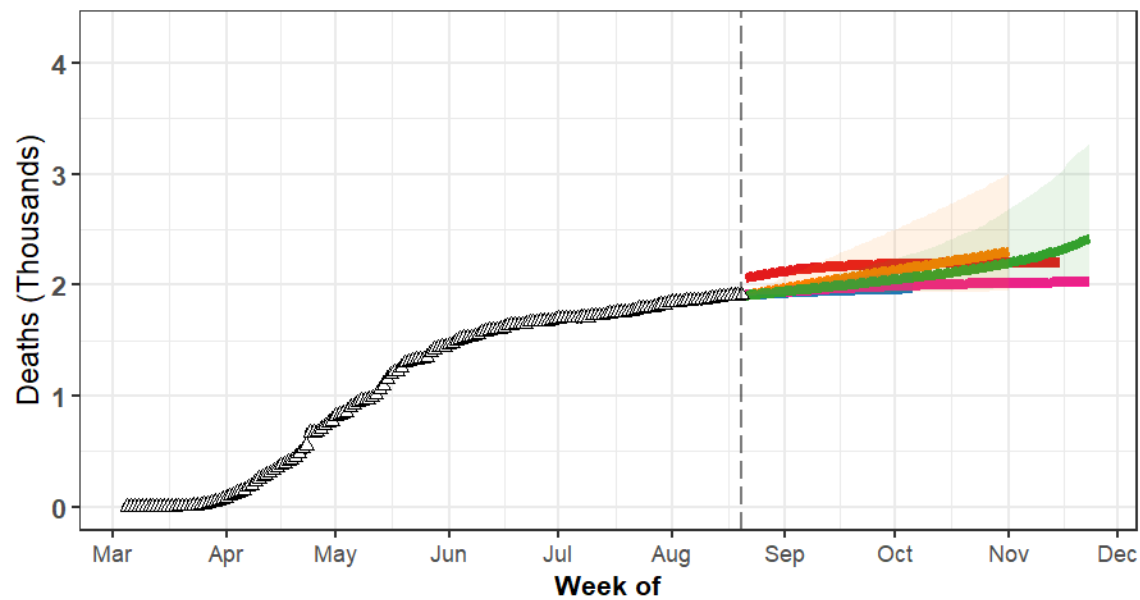

## Cumulative Out-Of-Sample Error (Post Intercept Shift)

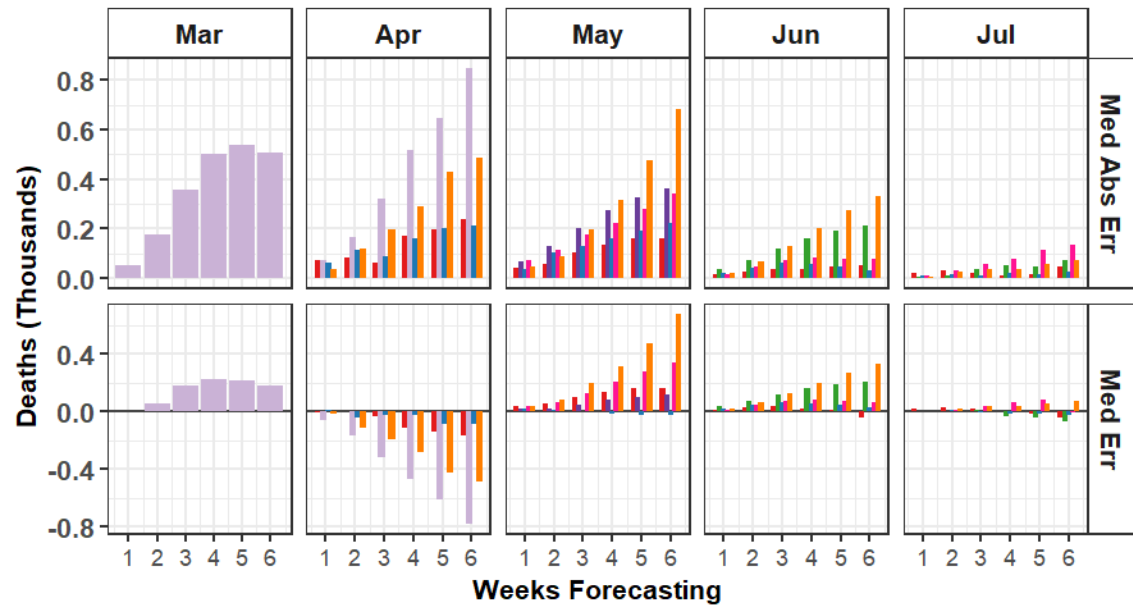

## All Model Versions

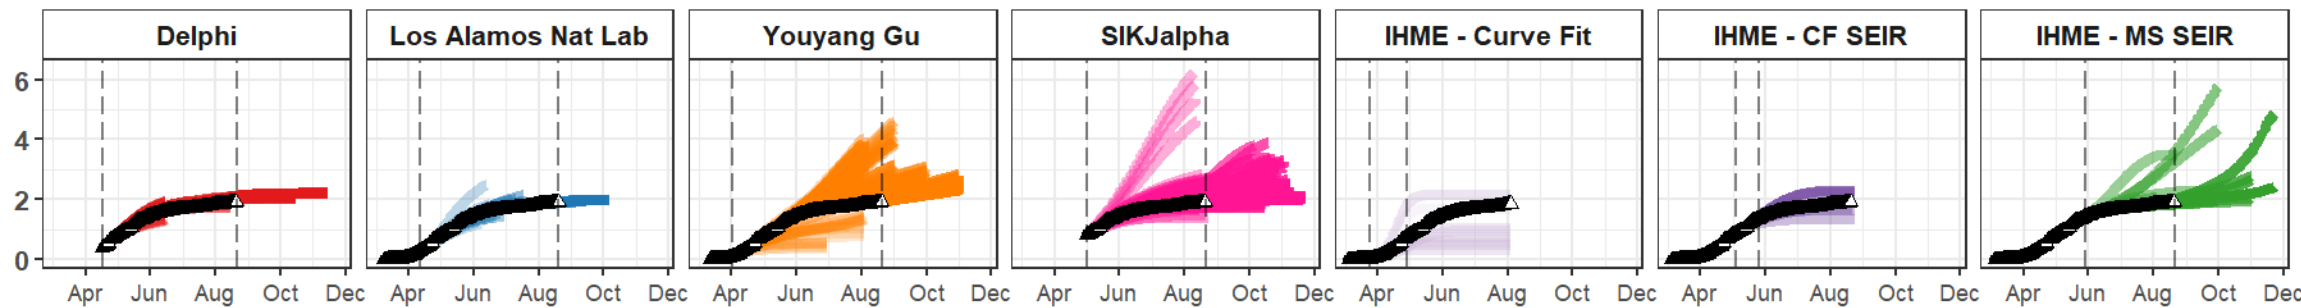

## All Cumulative Errors

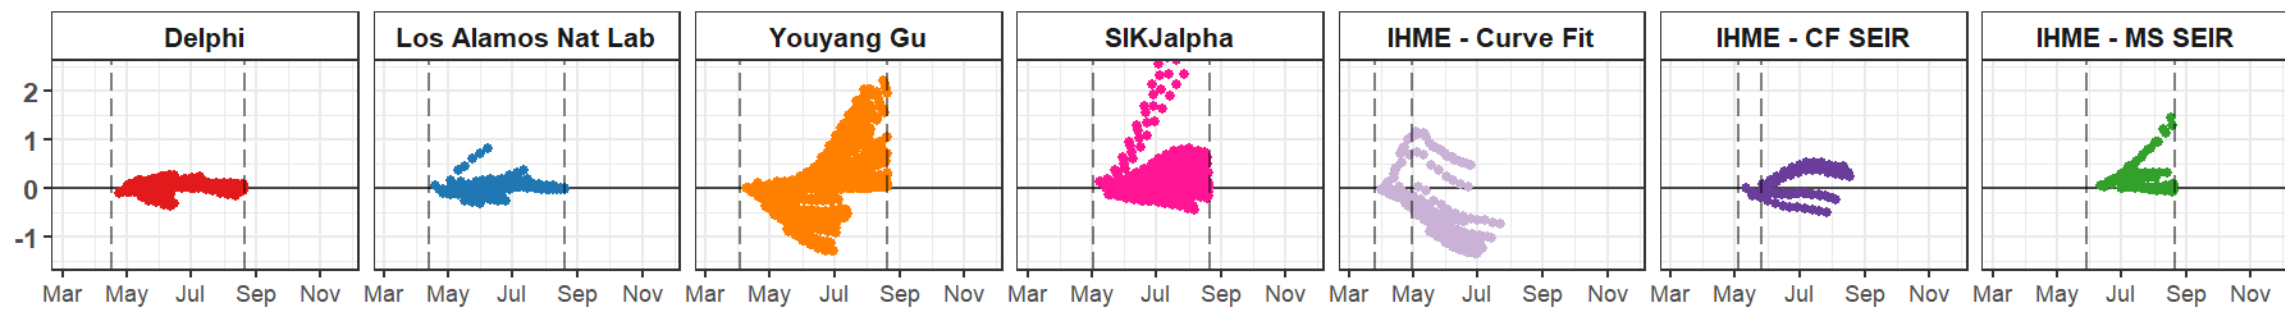

# Panama

## Current Forecast

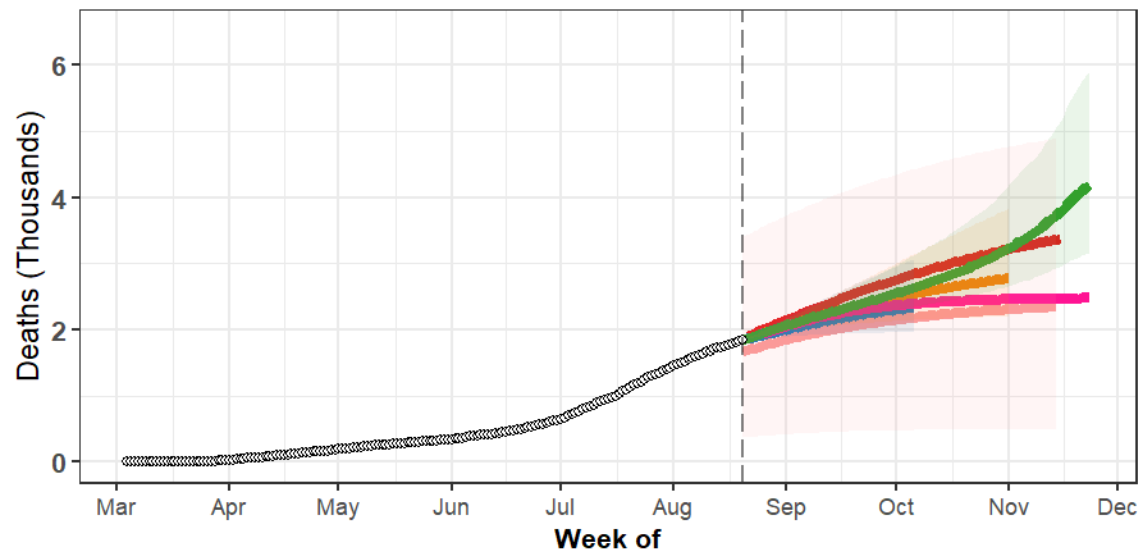

## Cumulative Out-Of-Sample Error (Post Intercept Shift)

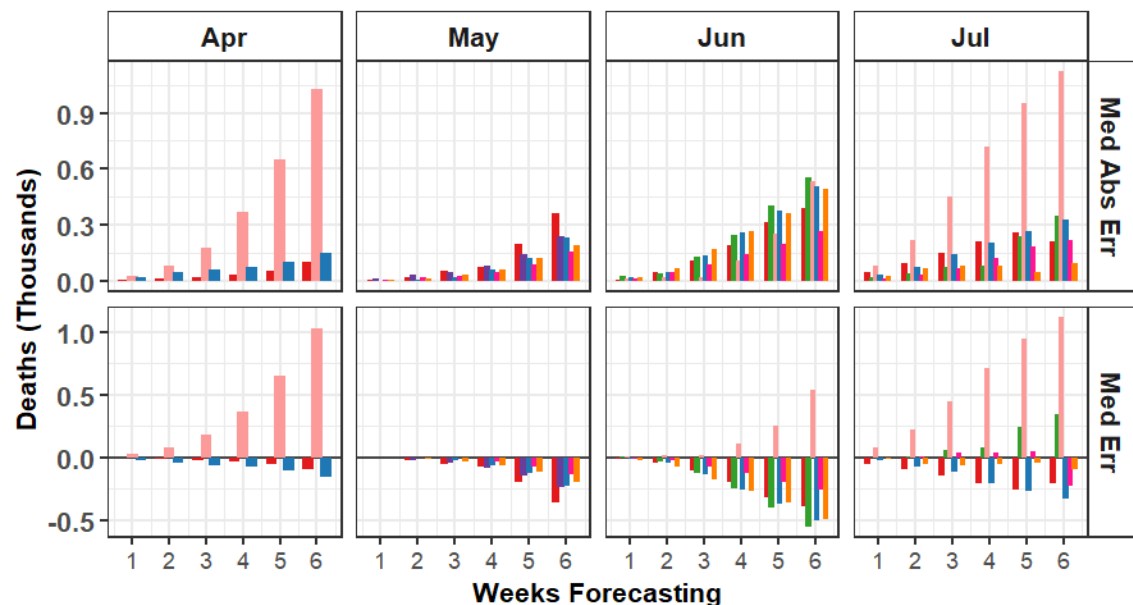

## All Model Versions

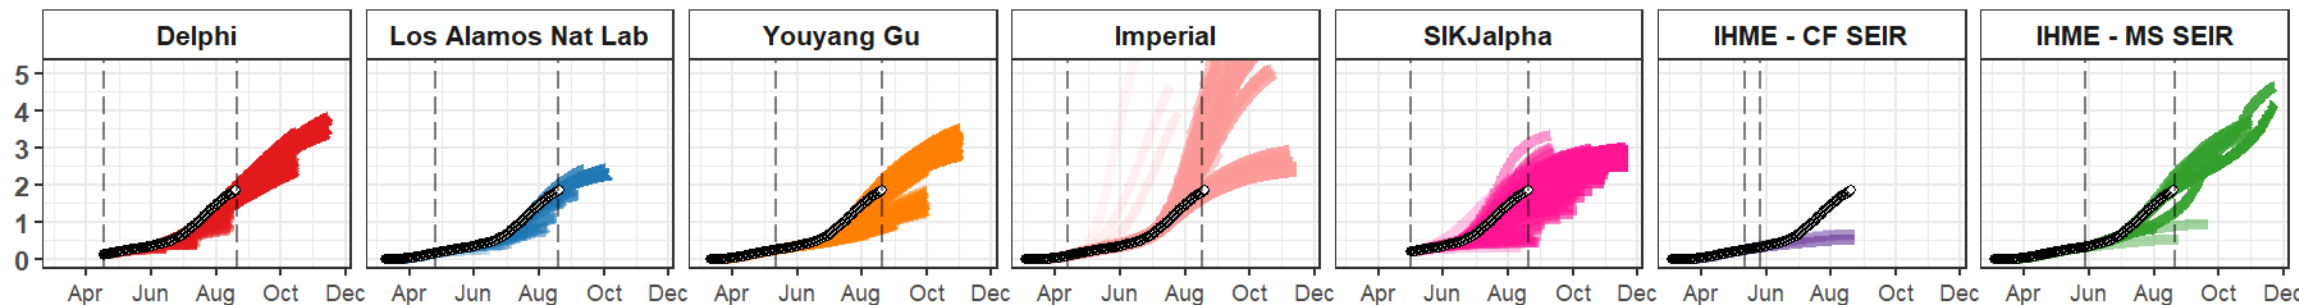

## All Cumulative Errors

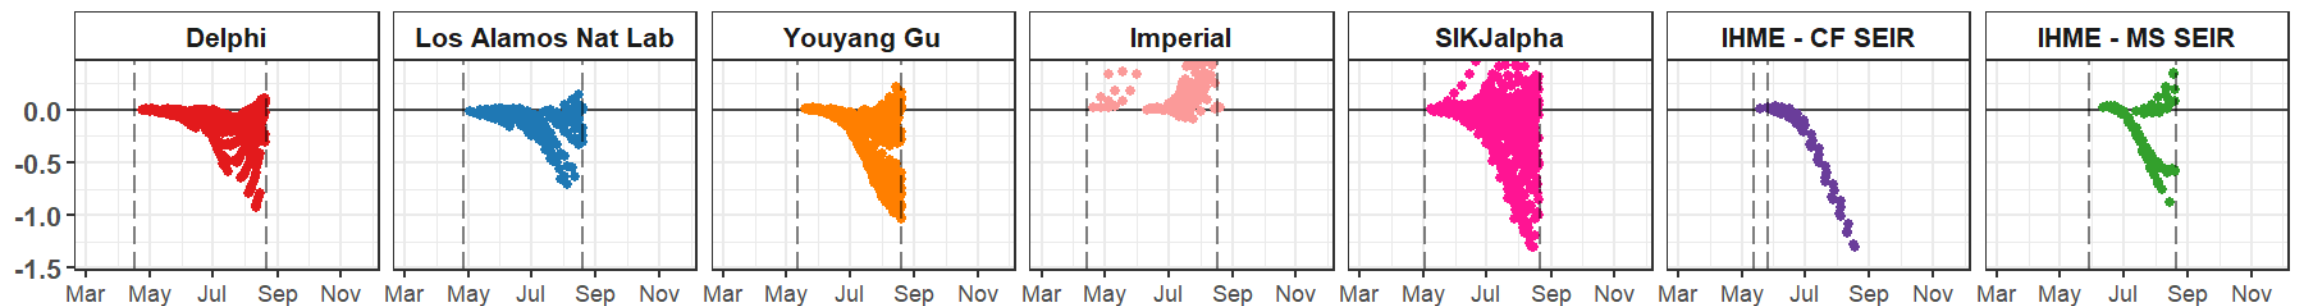

# Minnesota

## Current Forecast

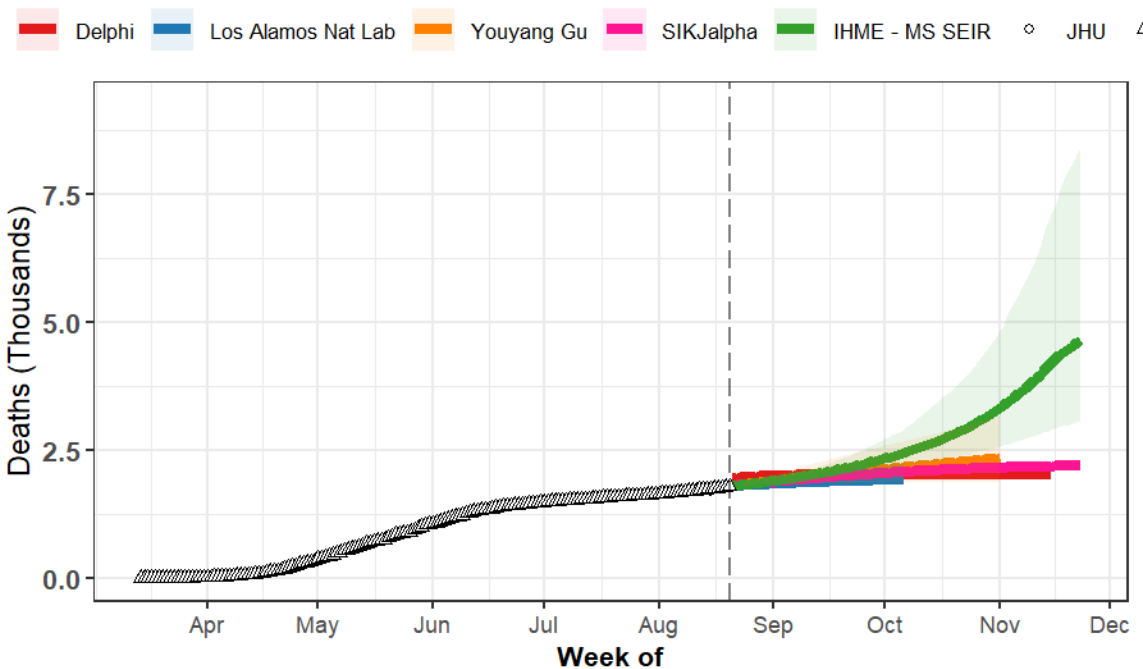

## Cumulative Out-Of-Sample Error (Post Intercept Shift)

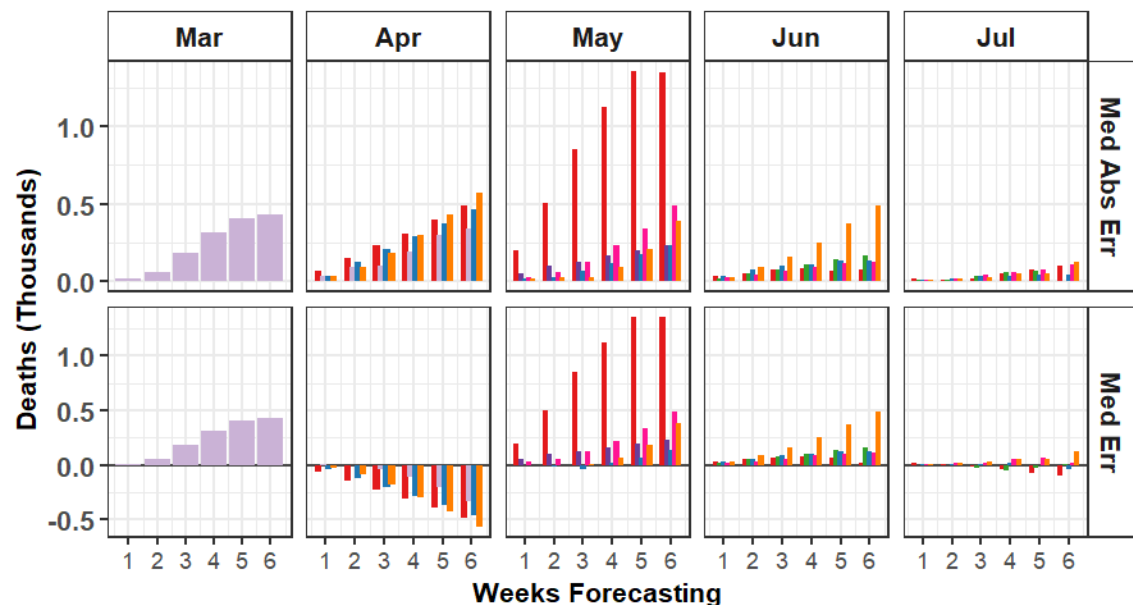

## All Model Versions

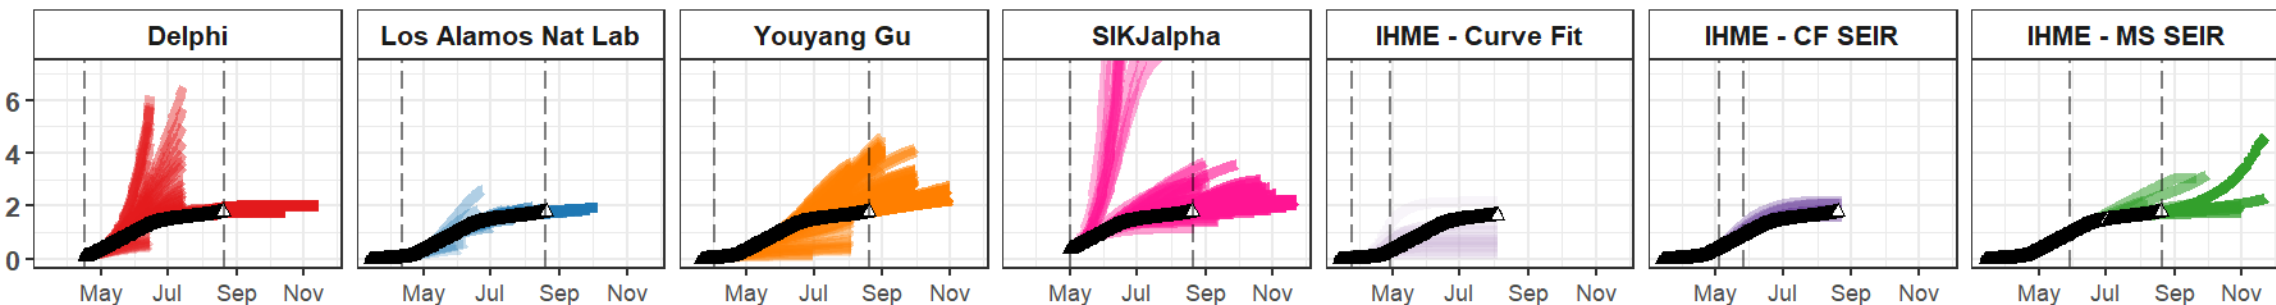

## All Cumulative Errors

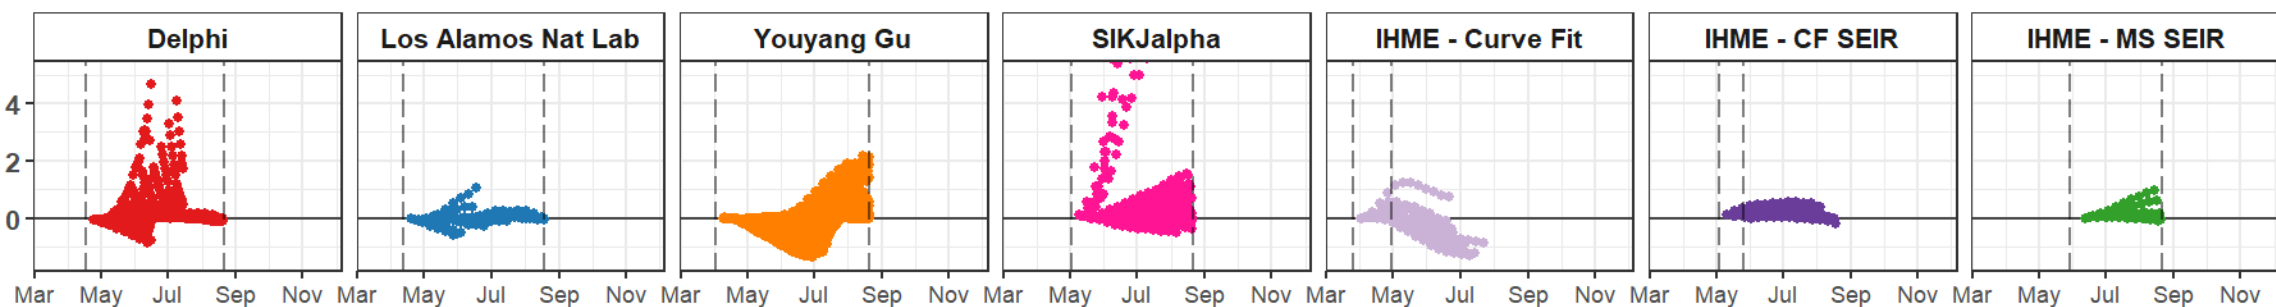

# Portugal

## Current Forecast

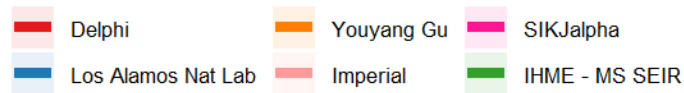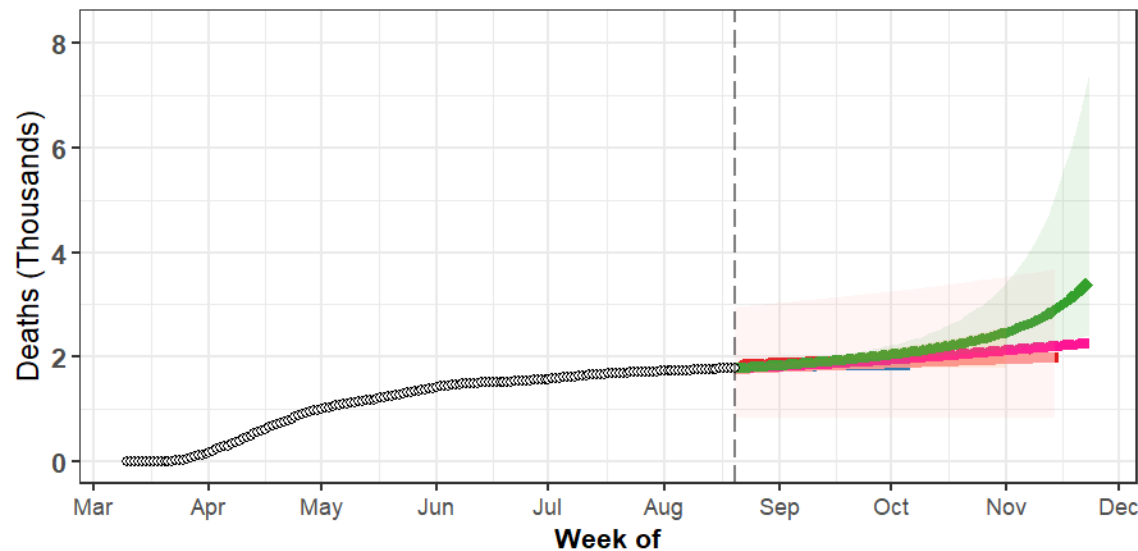

## Cumulative Out-Of-Sample Error (Post Intercept Shift)

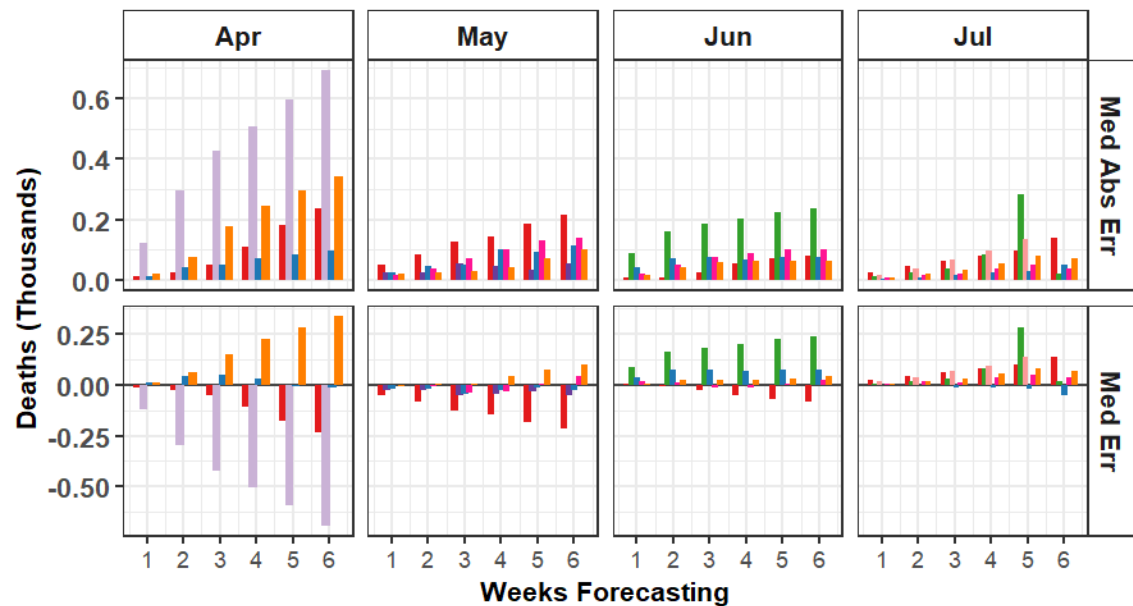

## All Model Versions

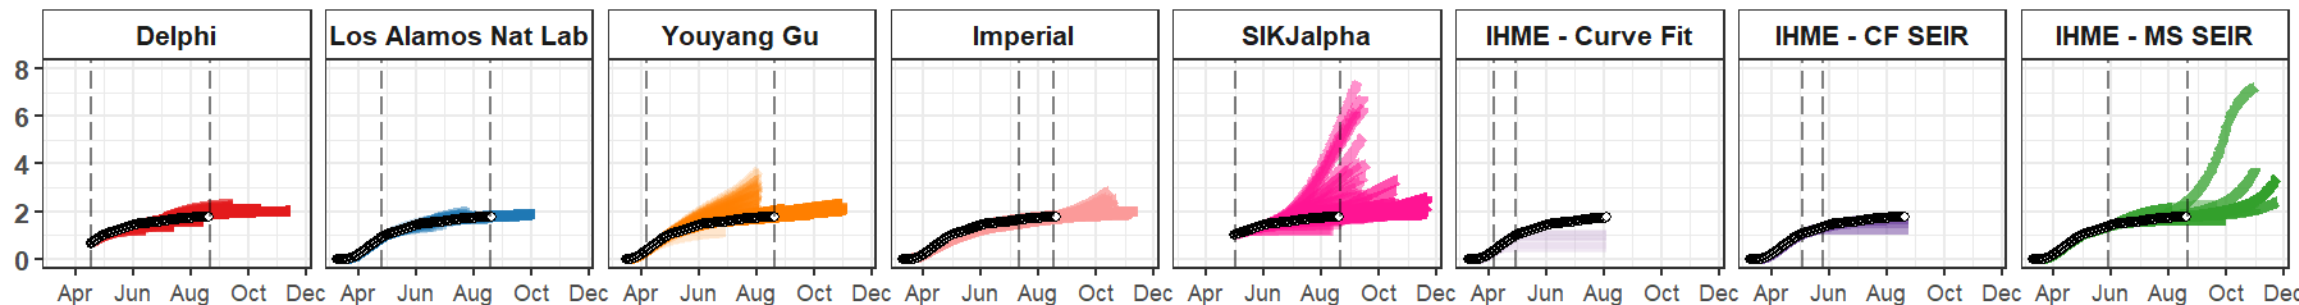

## All Cumulative Errors

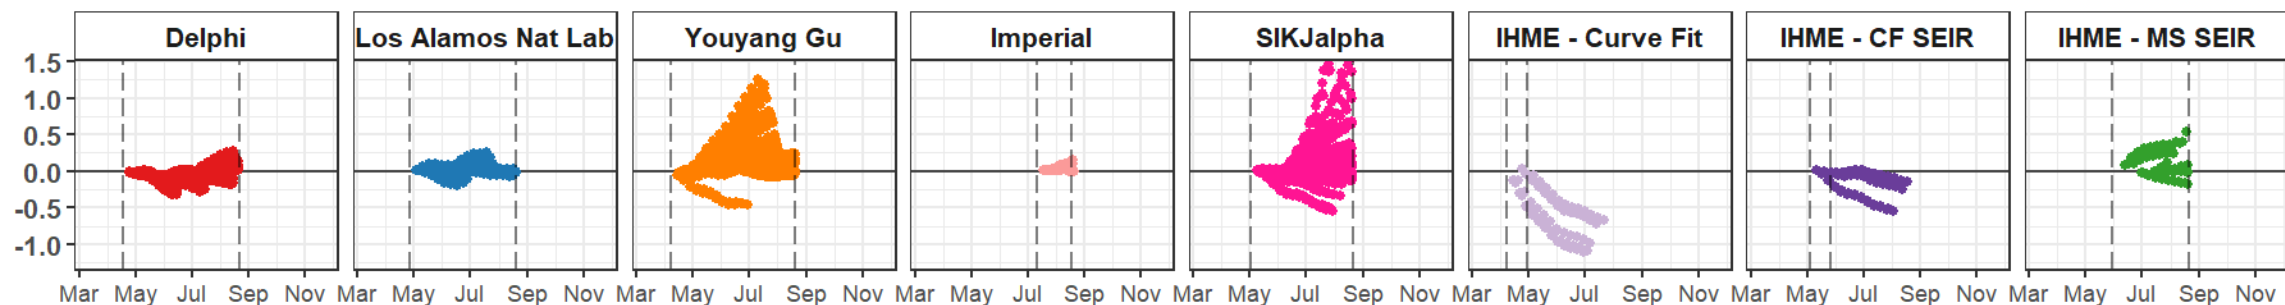

# Ireland

## Current Forecast

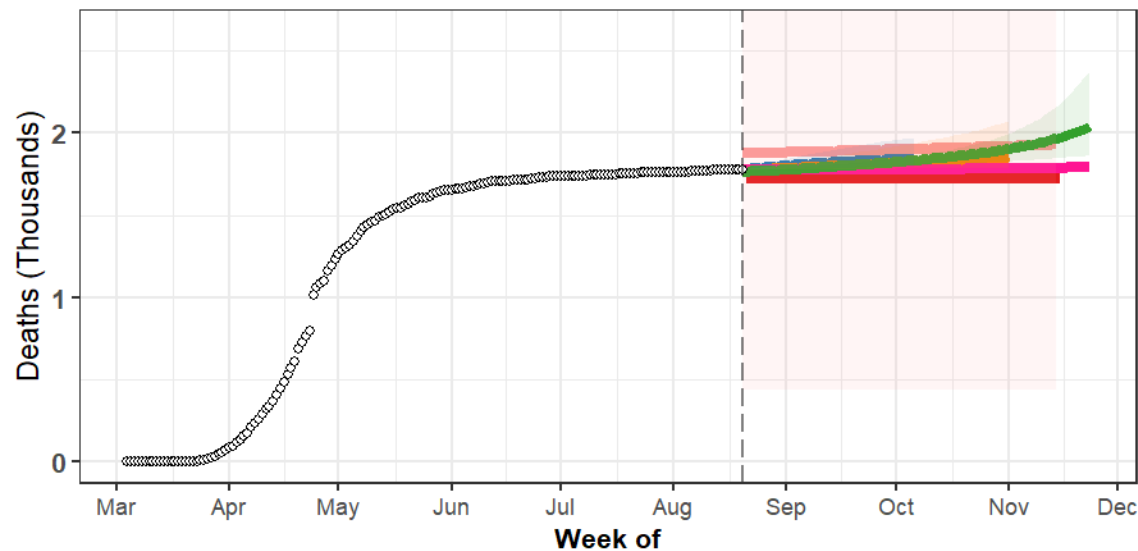

## Cumulative Out-Of-Sample Error (Post Intercept Shift)

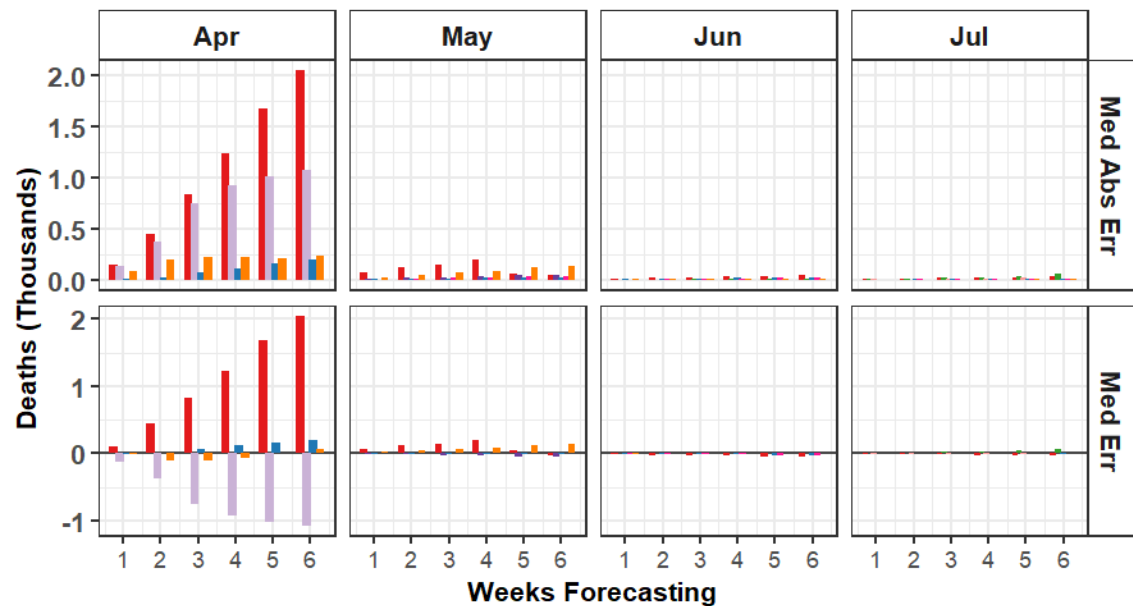

## All Model Versions

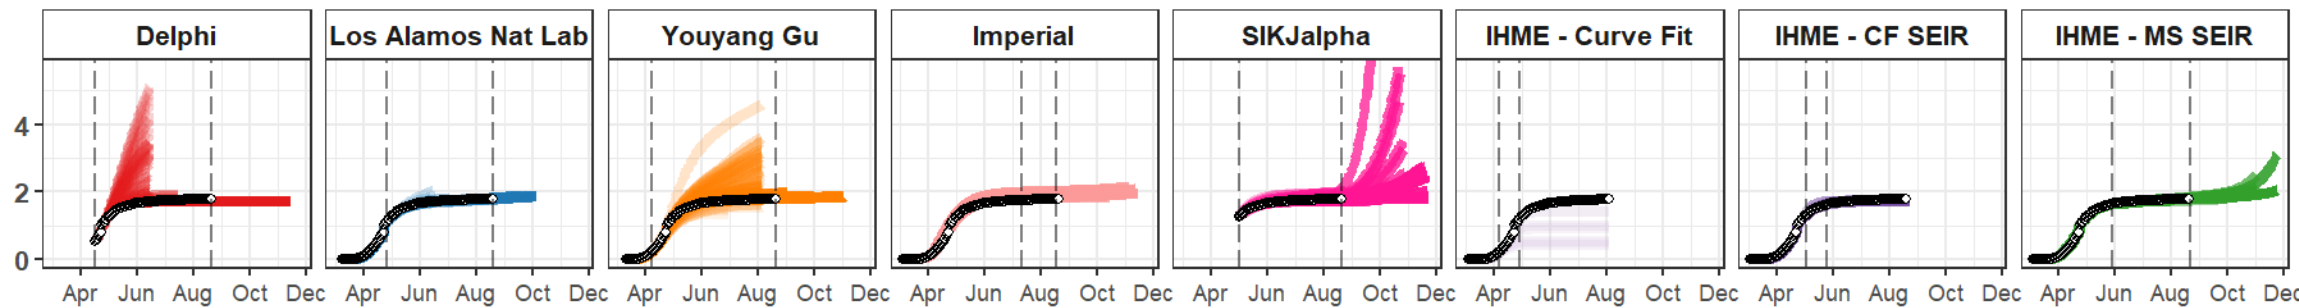

## All Cumulative Errors

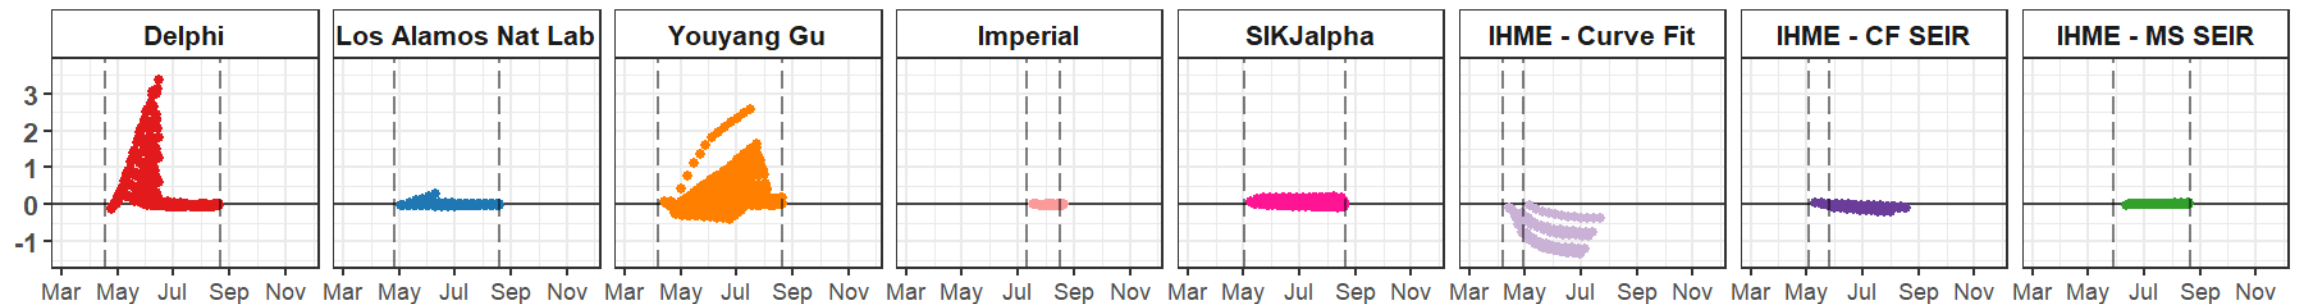

# Honduras

## Current Forecast

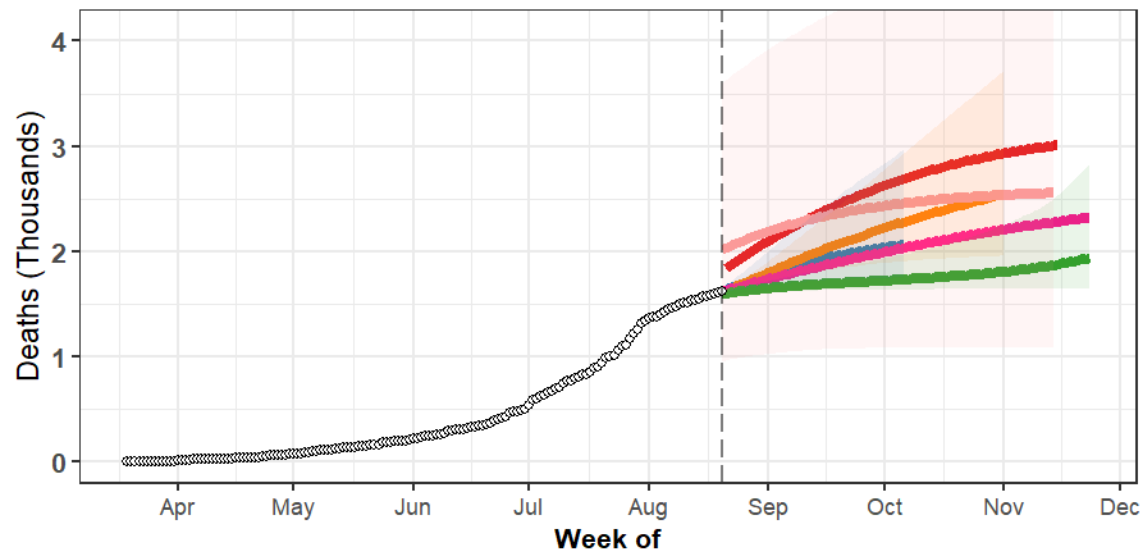

## Cumulative Out-Of-Sample Error (Post Intercept Shift)

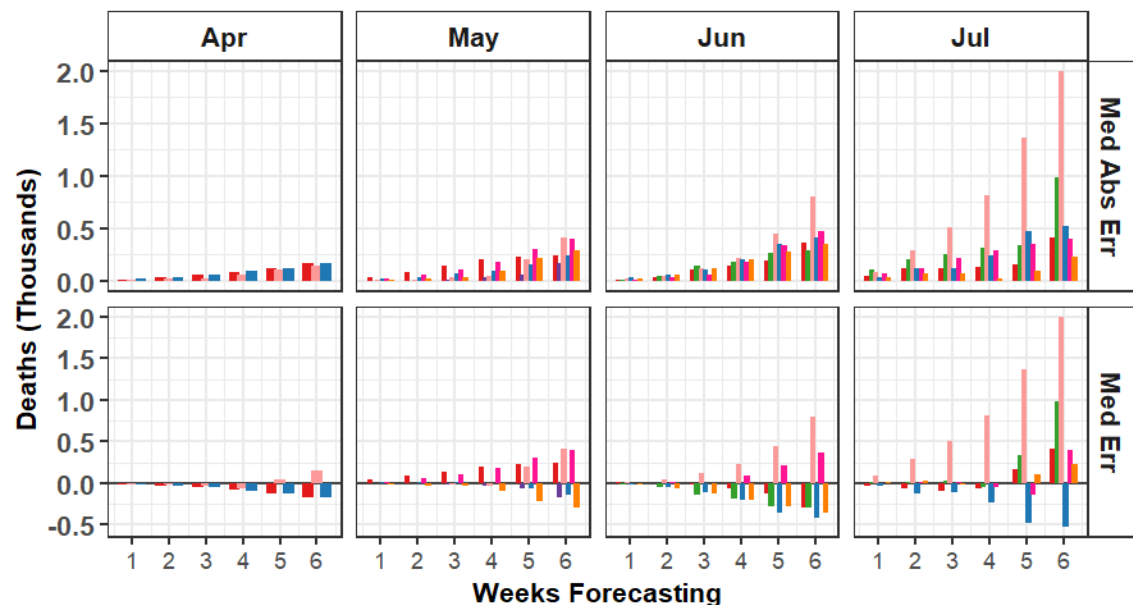

## All Model Versions

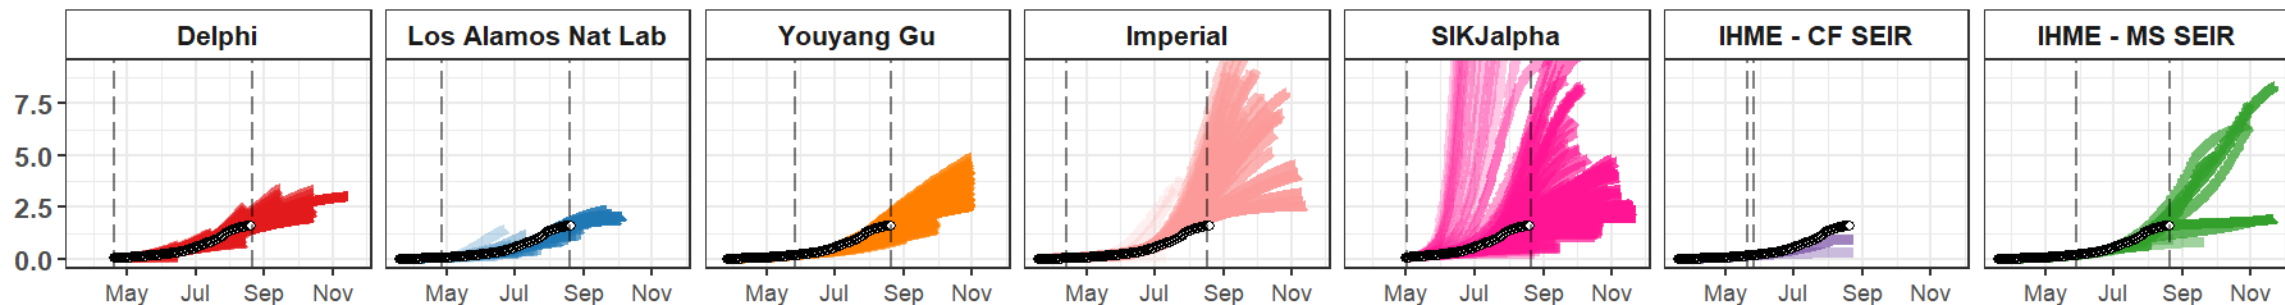

## All Cumulative Errors

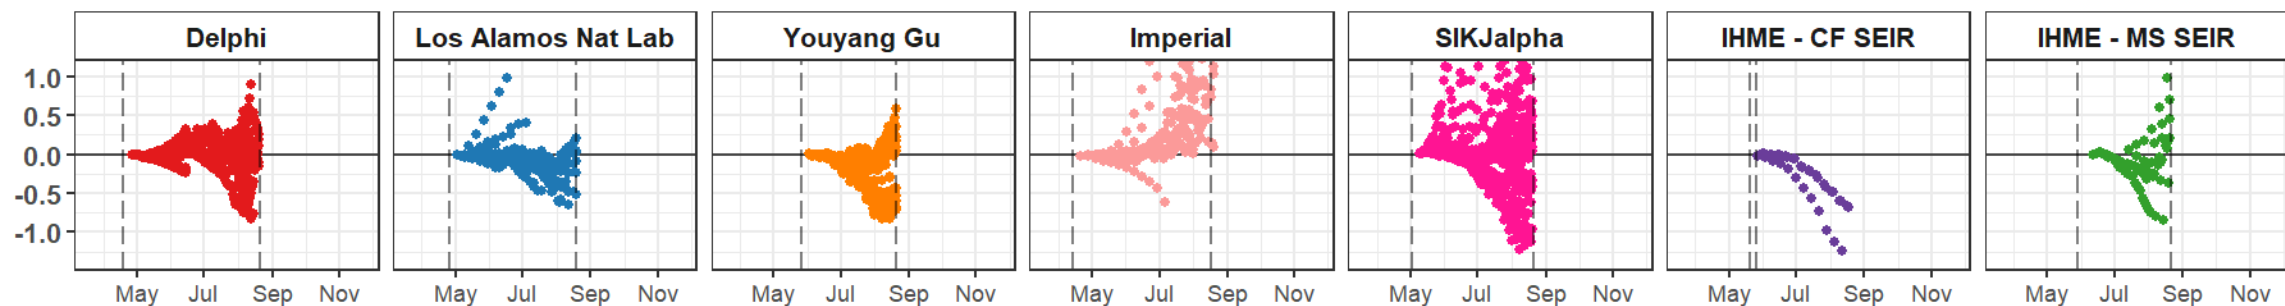

# Missouri

## Current Forecast

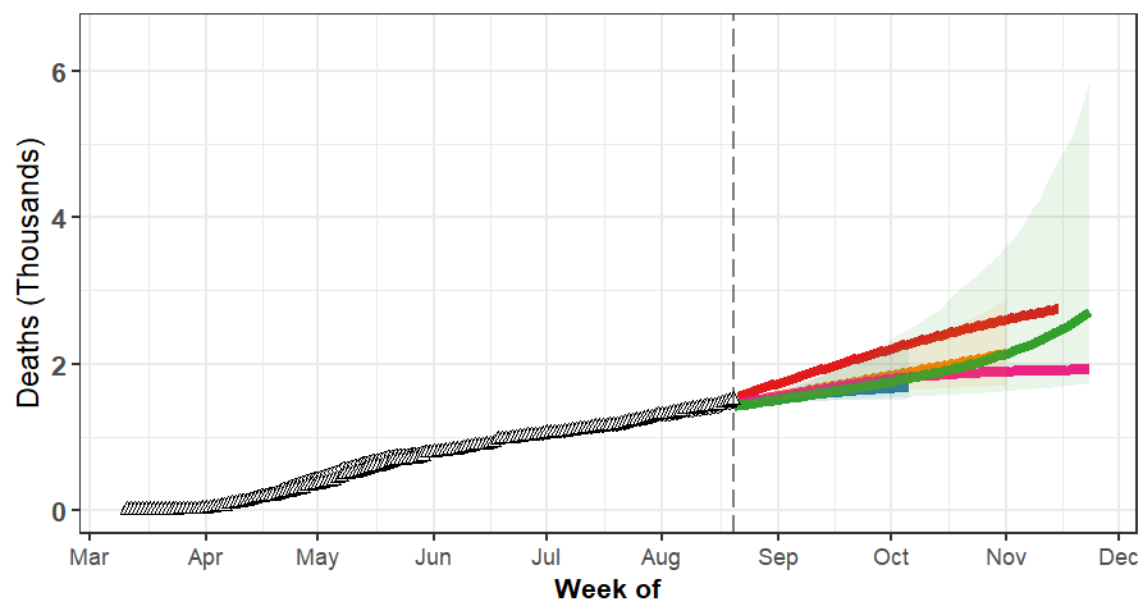

## Cumulative Out-Of-Sample Error (Post Intercept Shift)

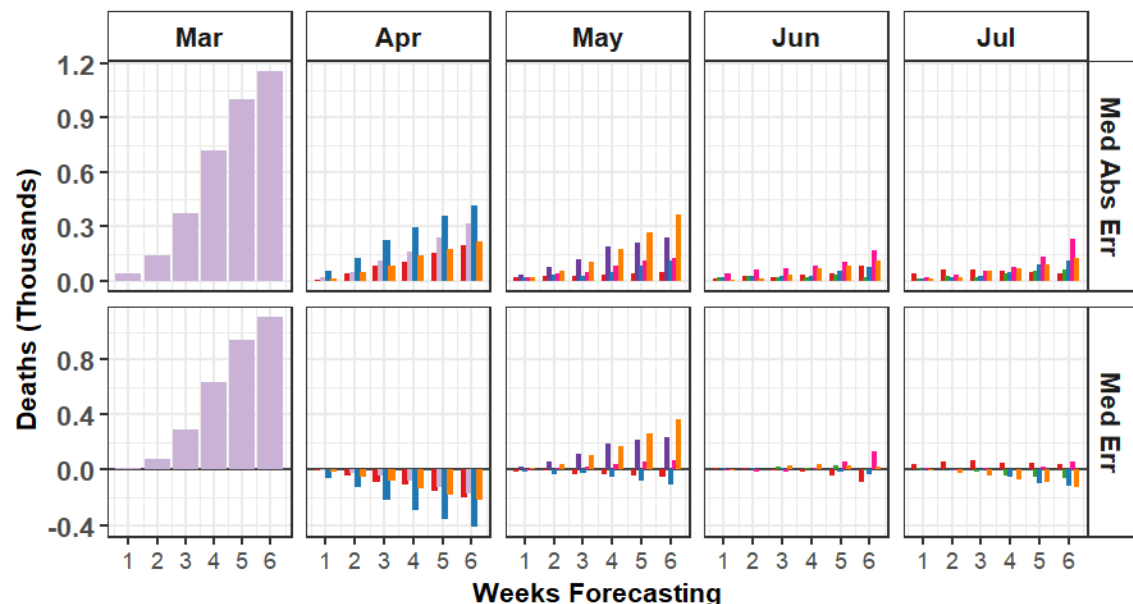

## All Model Versions

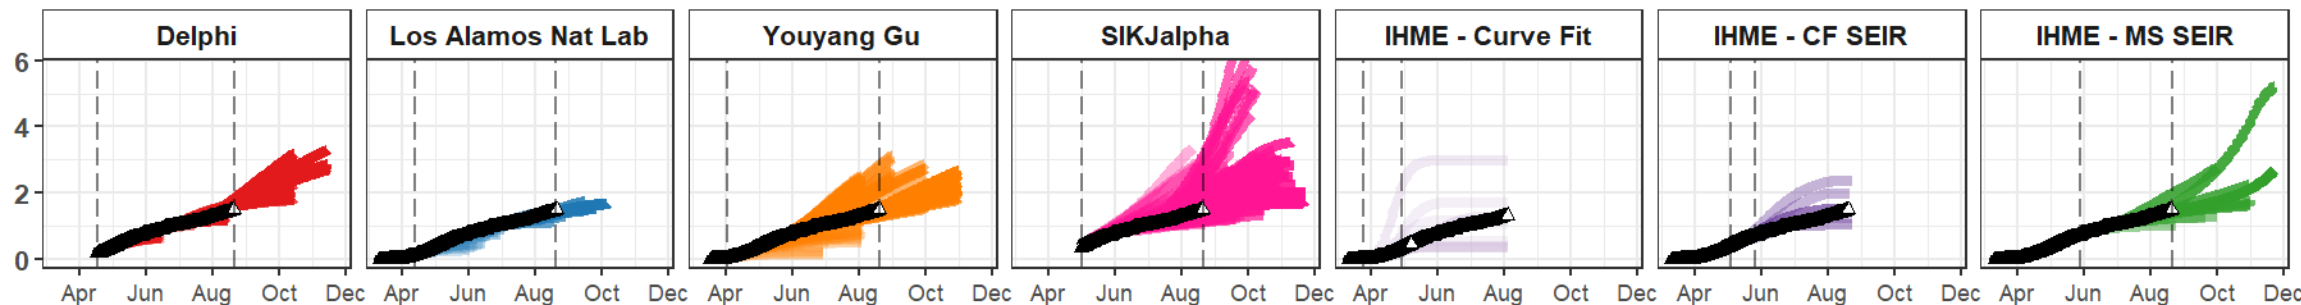

## All Cumulative Errors

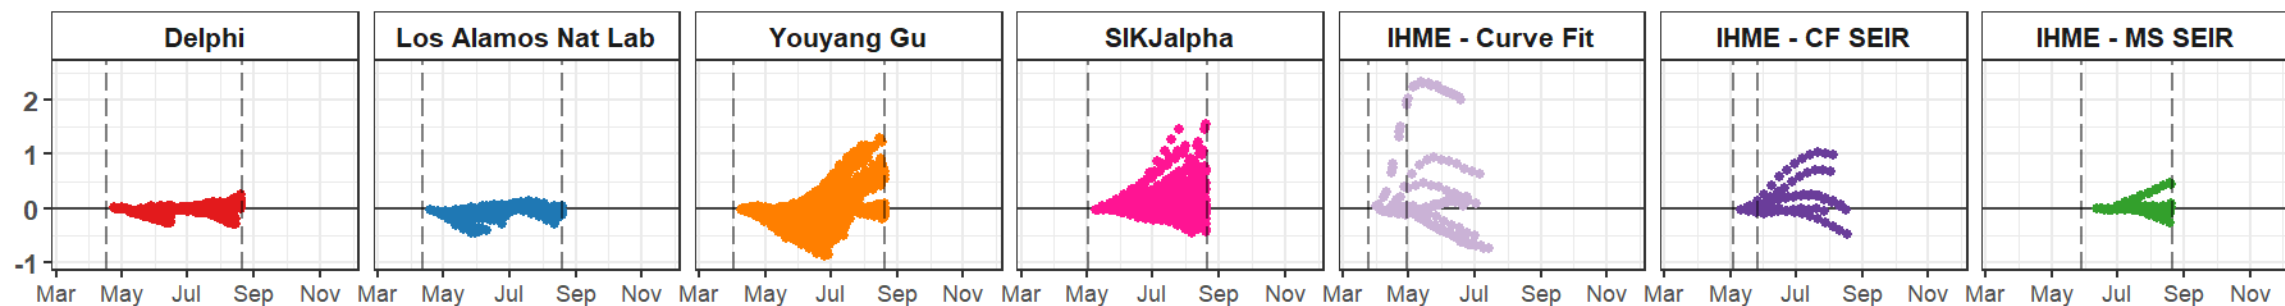

# Dominican Republic

## Current Forecast

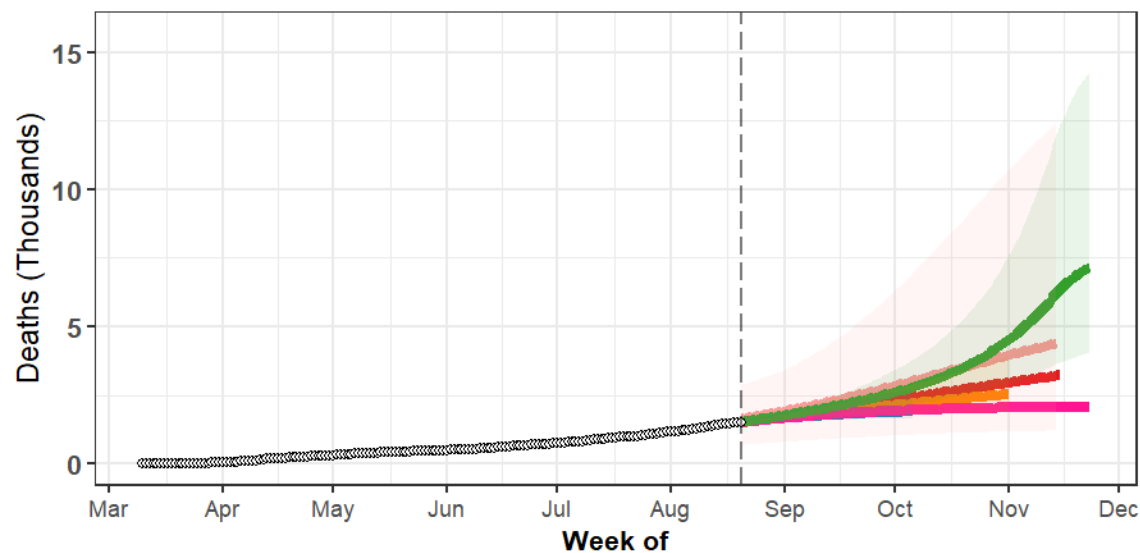

## Cumulative Out-Of-Sample Error (Post Intercept Shift)

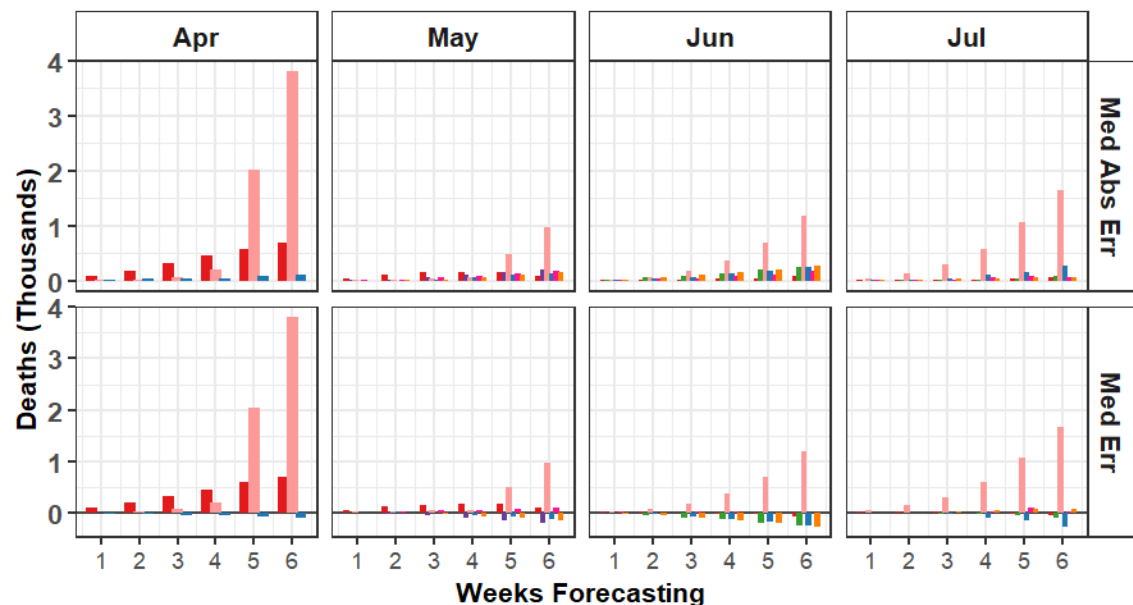

## All Model Versions

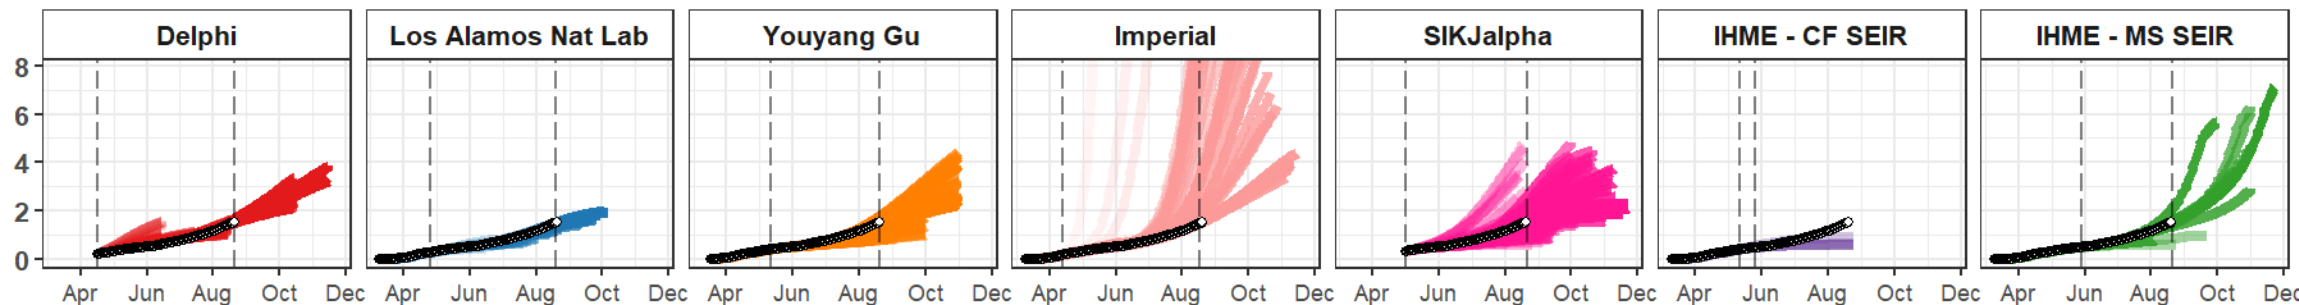

## All Cumulative Errors

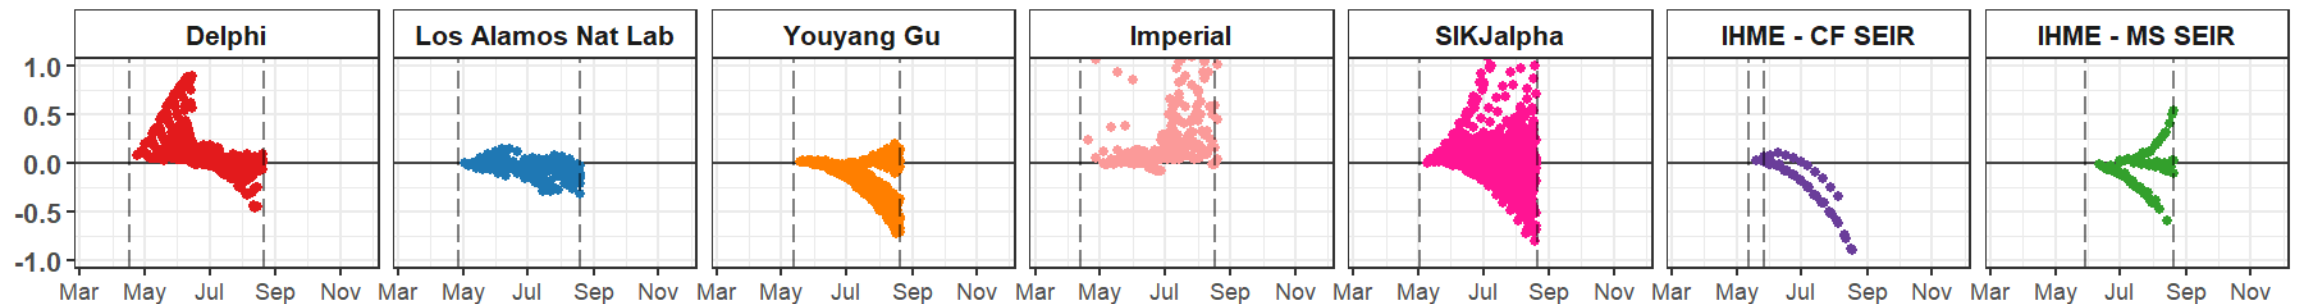



# Kyrgyzstan

## Current Forecast

Los Alamos Nat Lab Imperial SIKJalpha IHME - MS SEIR

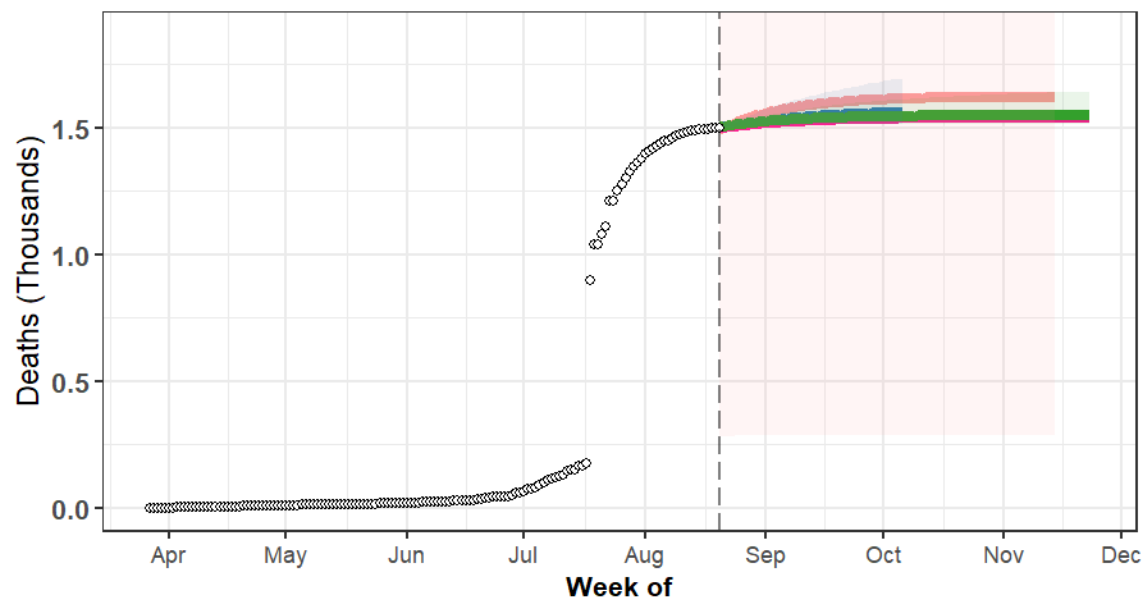

## Cumulative Out-Of-Sample Error (Post Intercept Shift)

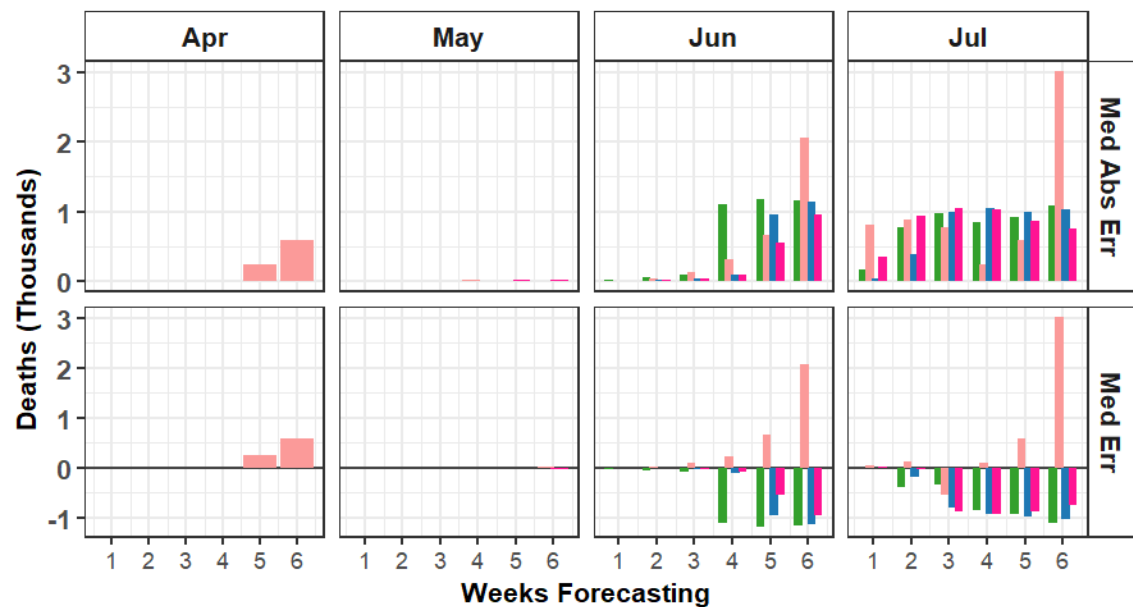

## All Model Versions

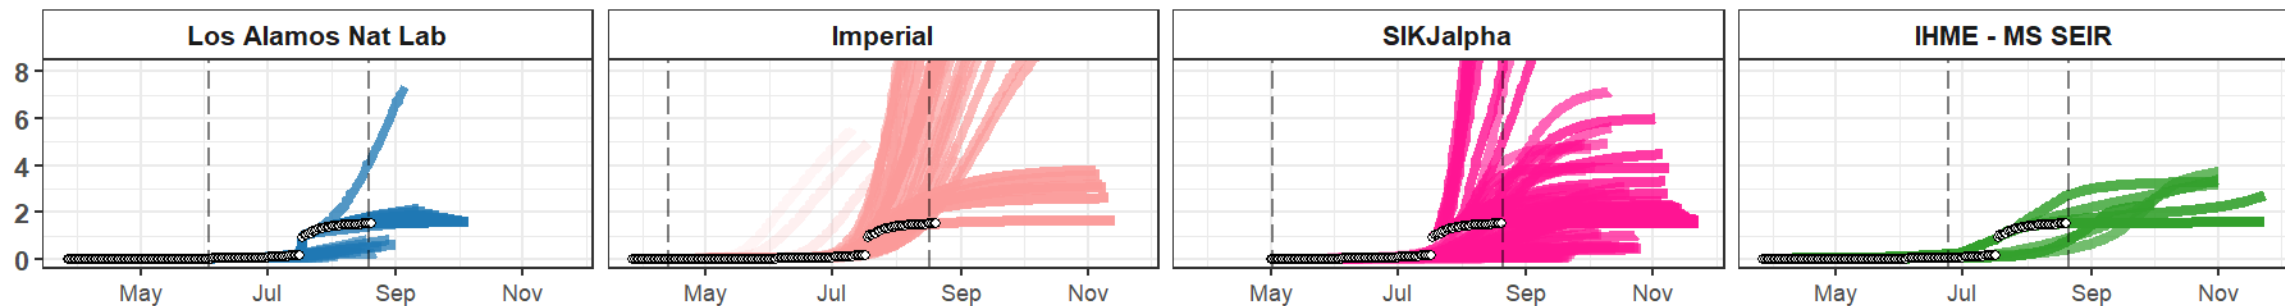

## All Cumulative Errors

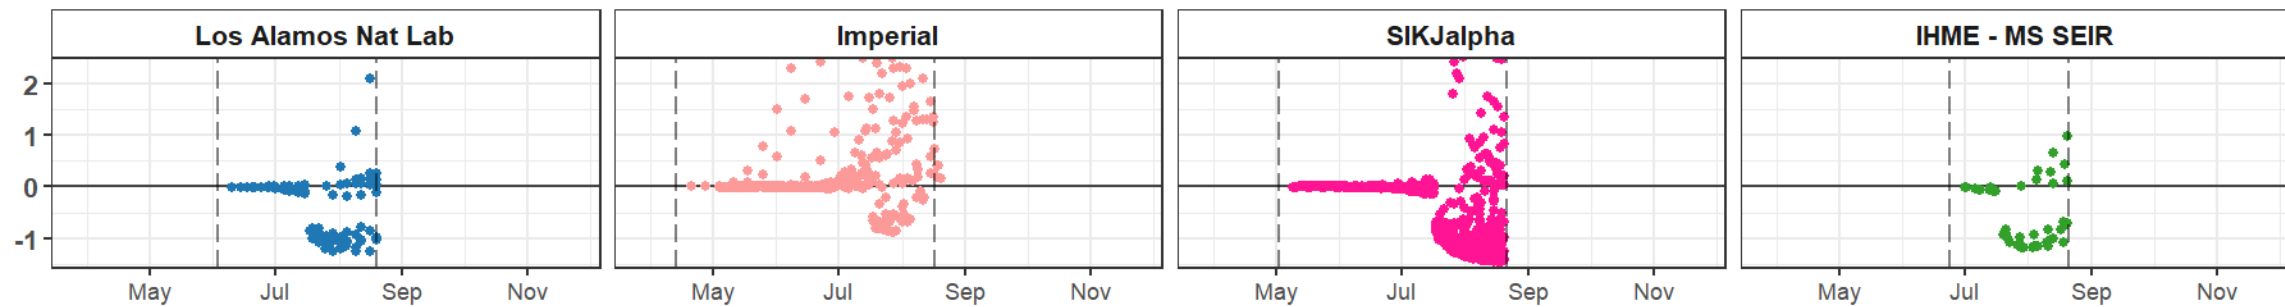

# Tennessee

## Current Forecast

█ Delphi 
 █ Los Alamos Nat Lab 
 █ Youyang Gu 
 █ SIKJalpha 
 █ IHME - MS SEIR 
 ◊ JHU

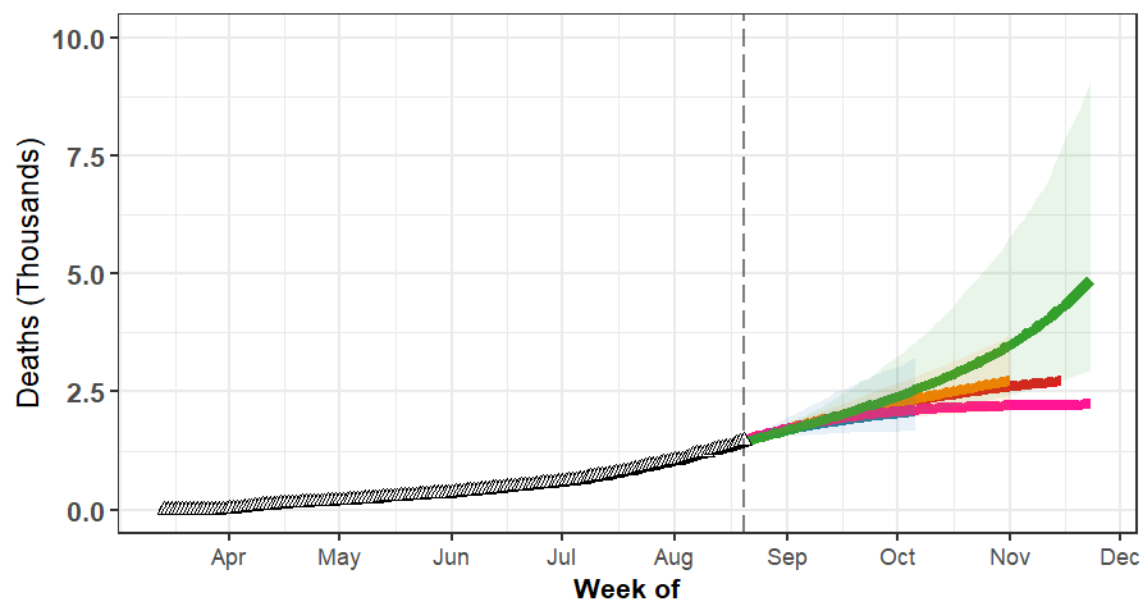

## Cumulative Out-Of-Sample Error (Post Intercept Shift)

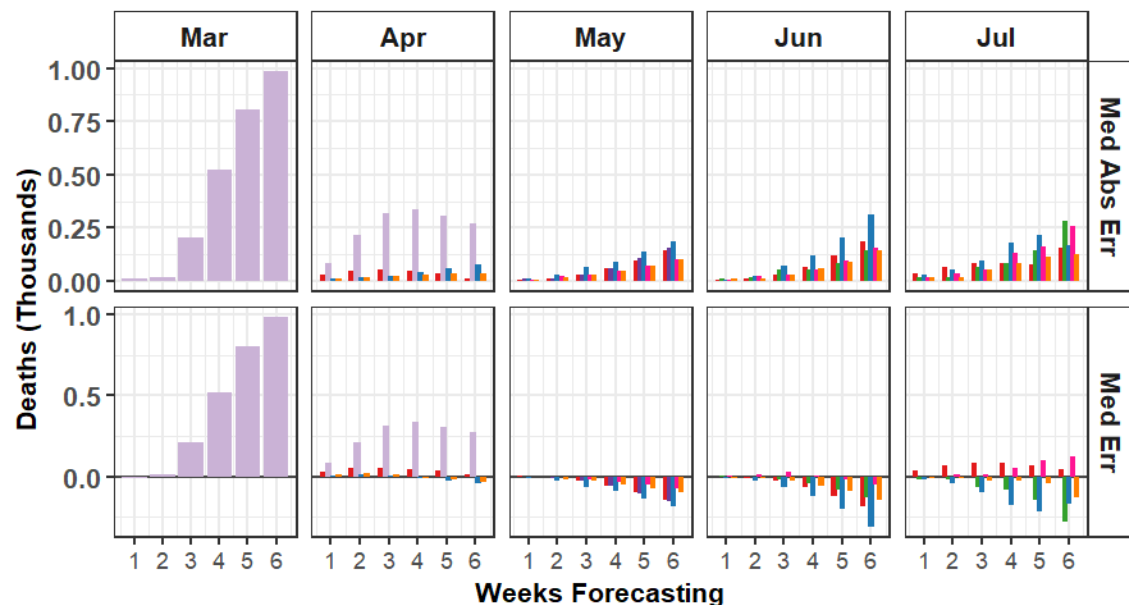

## All Model Versions

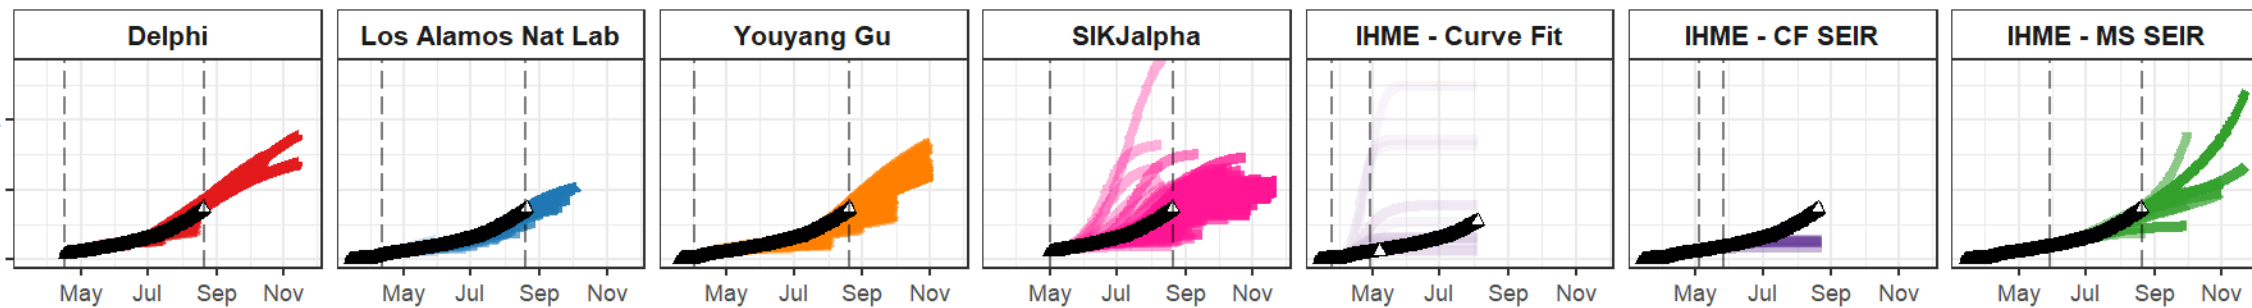

## All Cumulative Errors

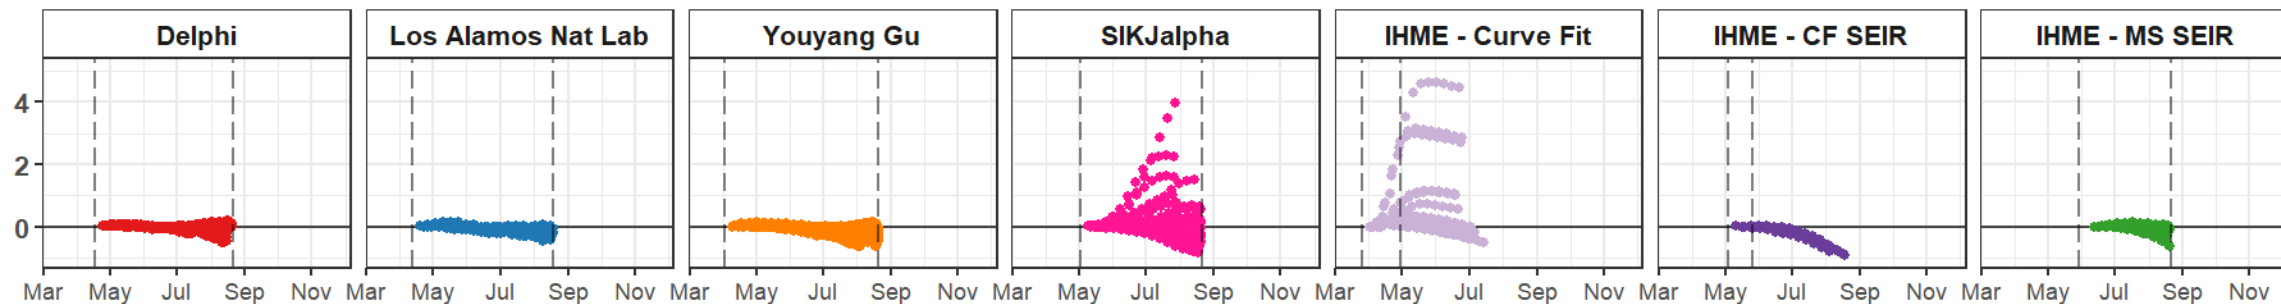

# Kazakhstan

## Current Forecast

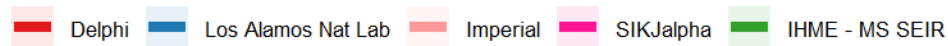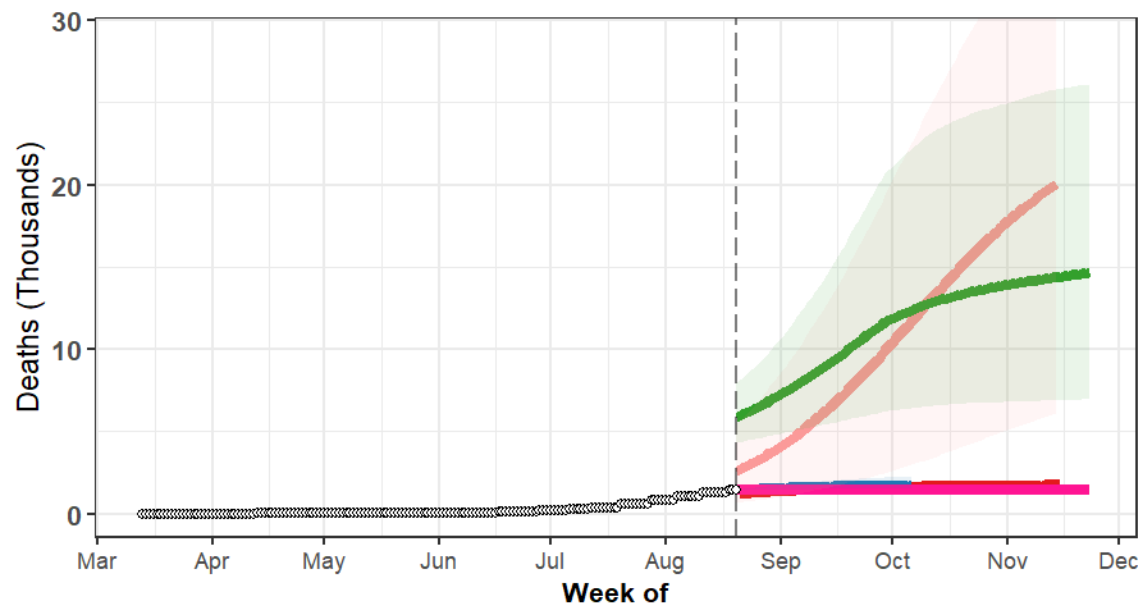

## Cumulative Out-Of-Sample Error (Post Intercept Shift)

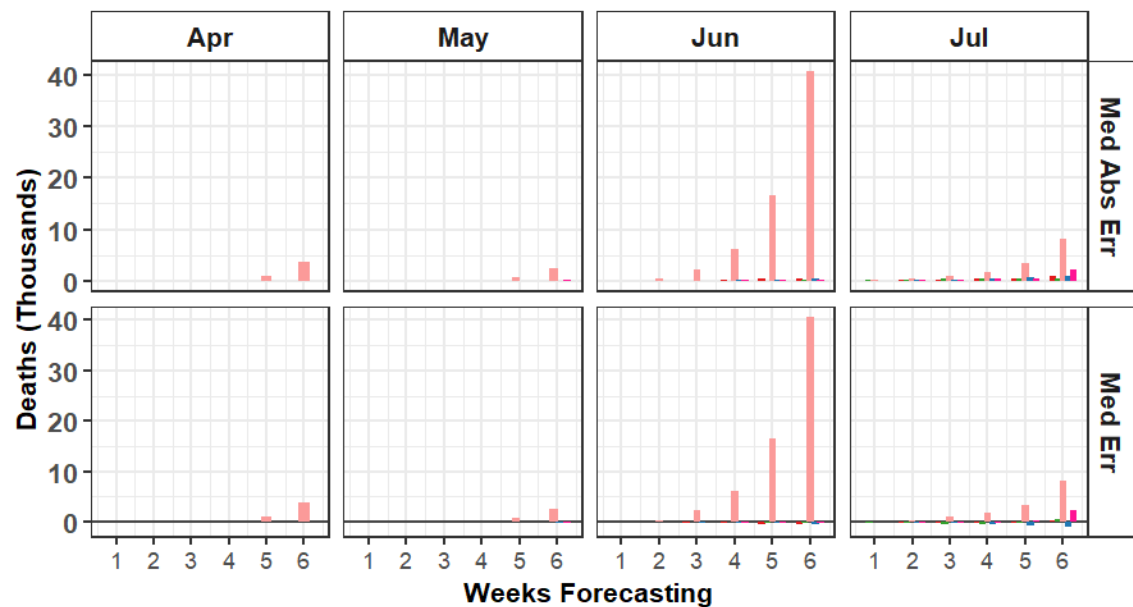

## All Model Versions

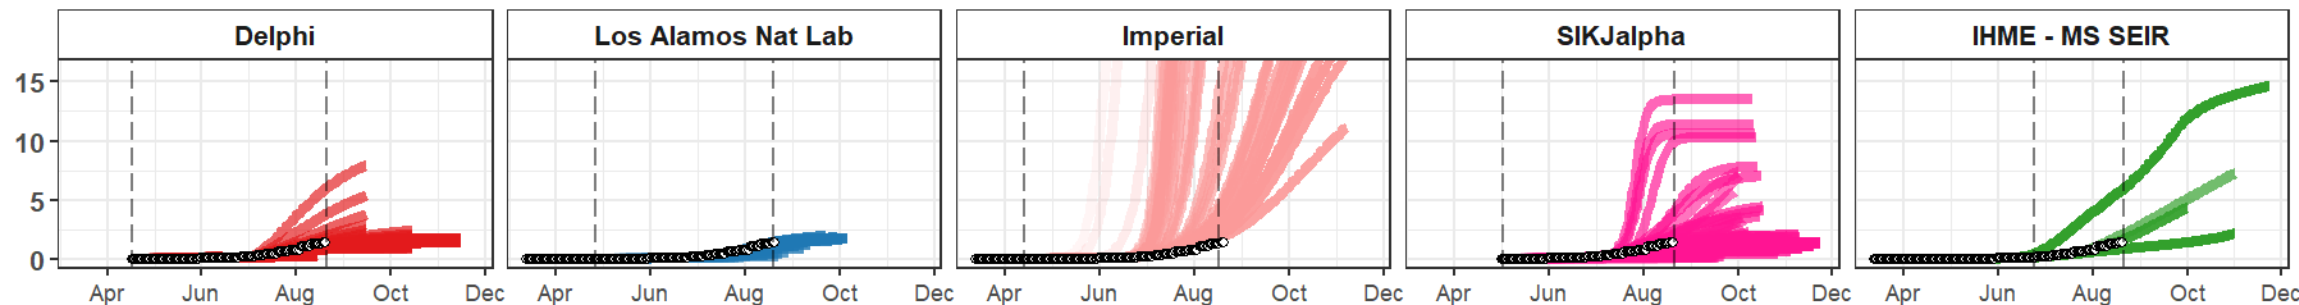

## All Cumulative Errors

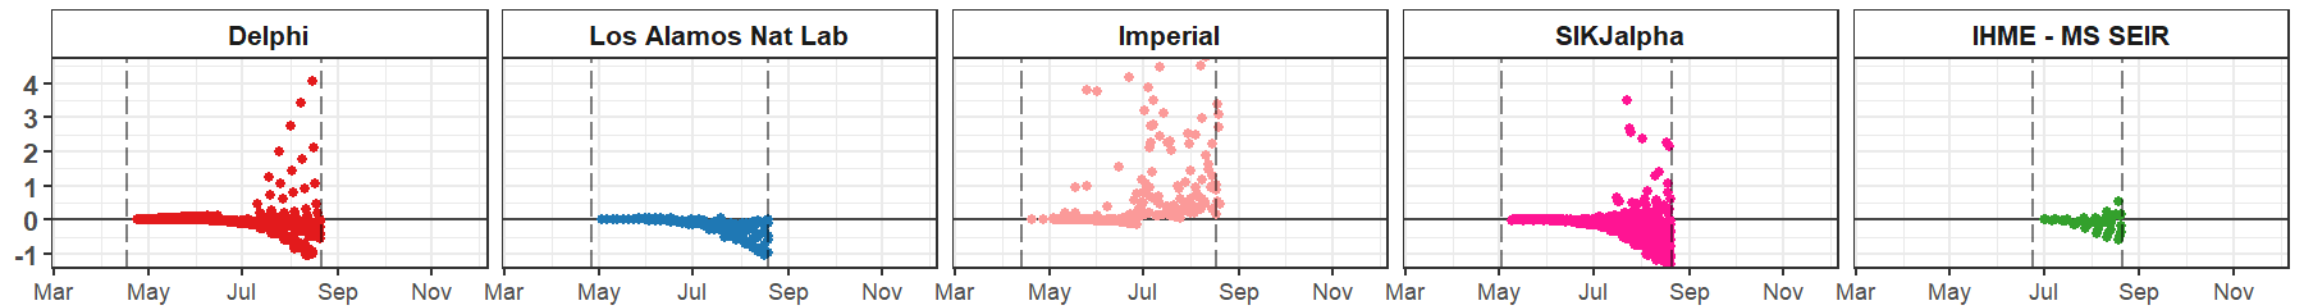

# Algeria

## Current Forecast

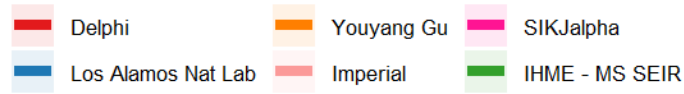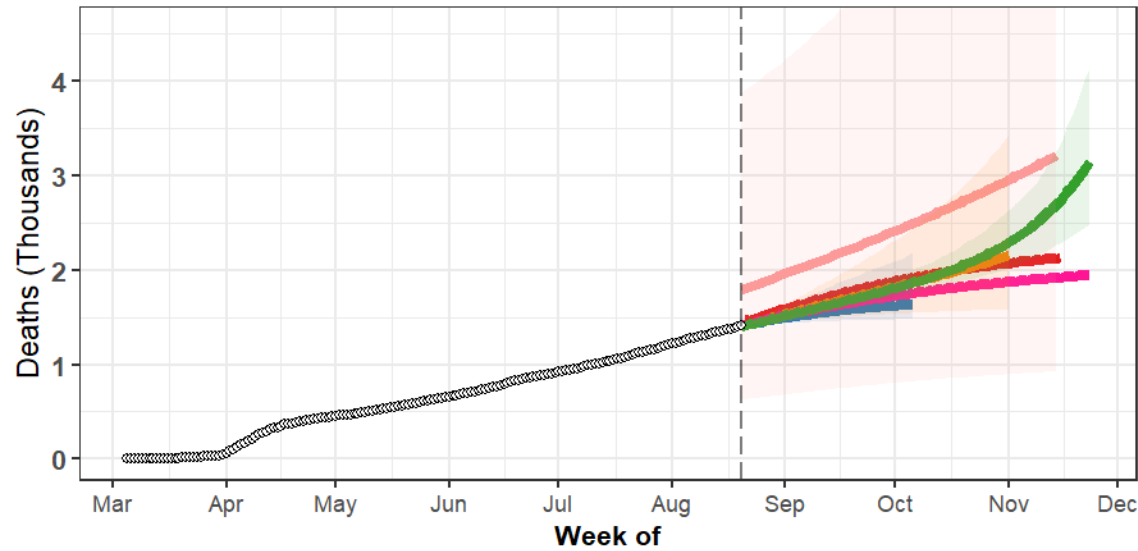

## Cumulative Out-Of-Sample Error (Post Intercept Shift)

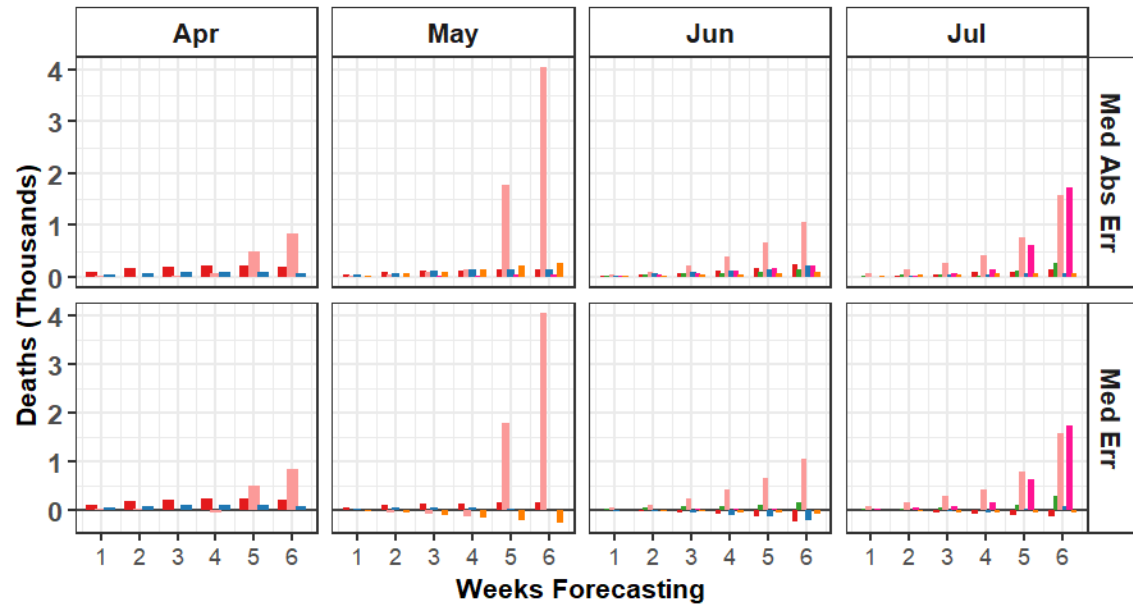

## All Model Versions

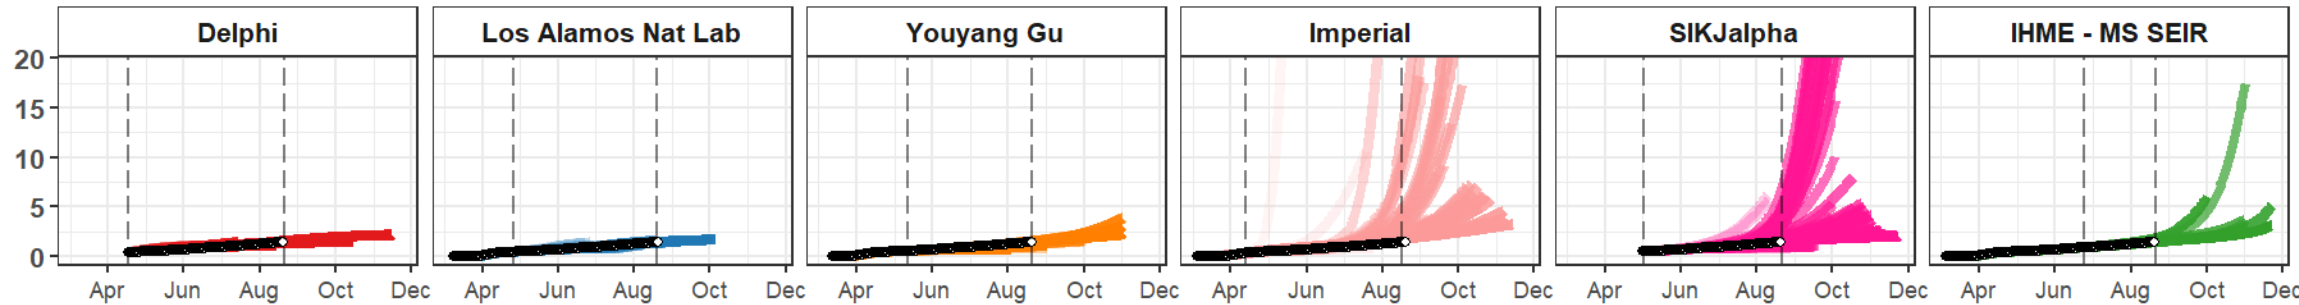

## All Cumulative Errors

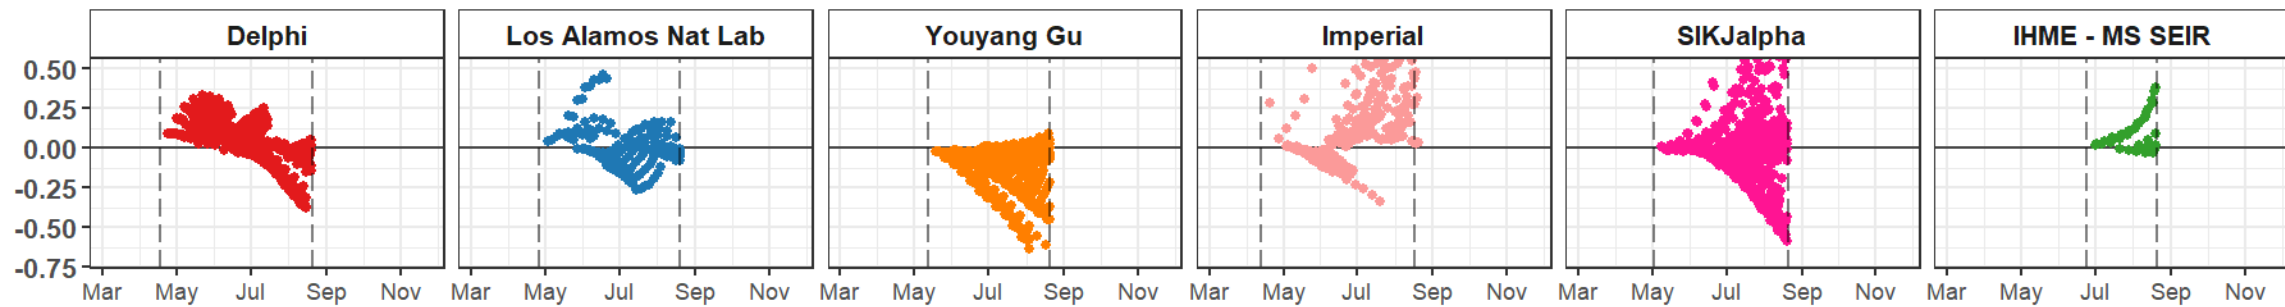

# Afghanistan

## Current Forecast

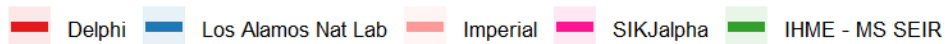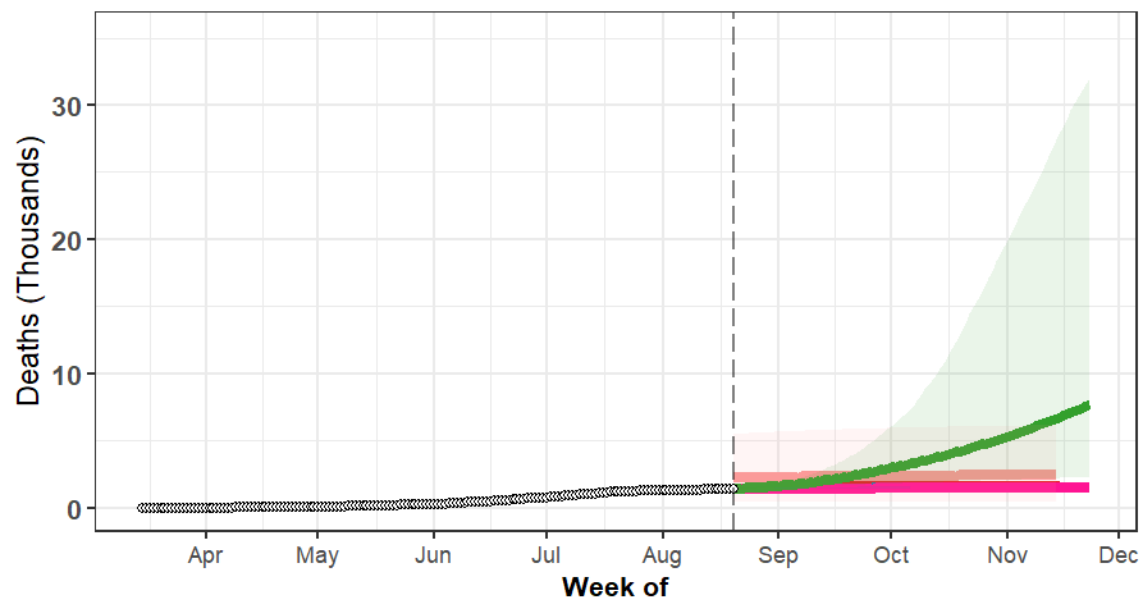

## Cumulative Out-Of-Sample Error (Post Intercept Shift)

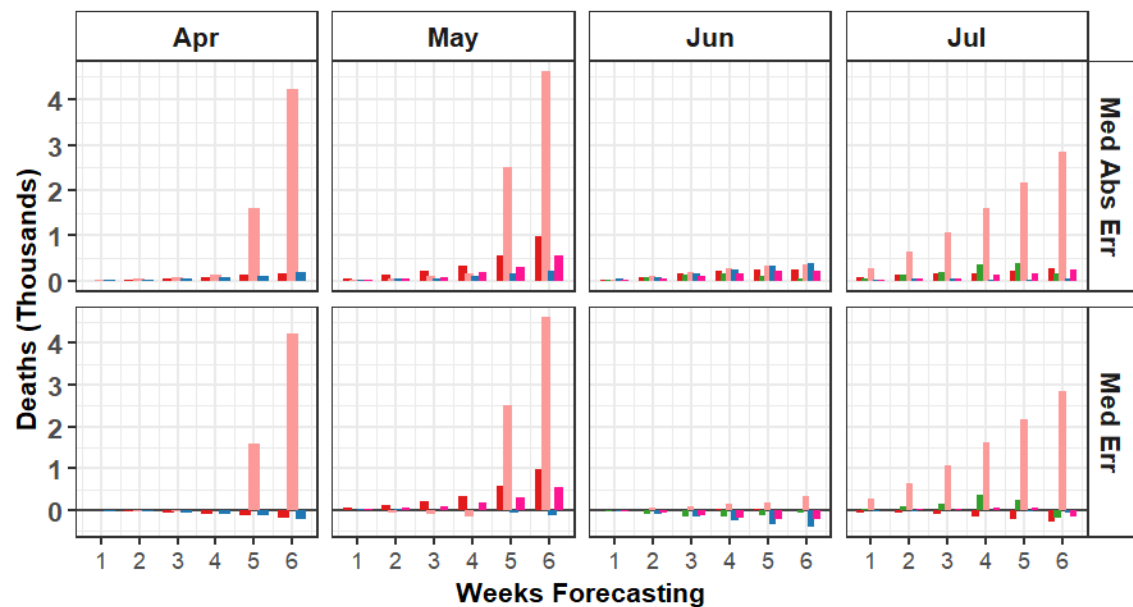

## All Model Versions

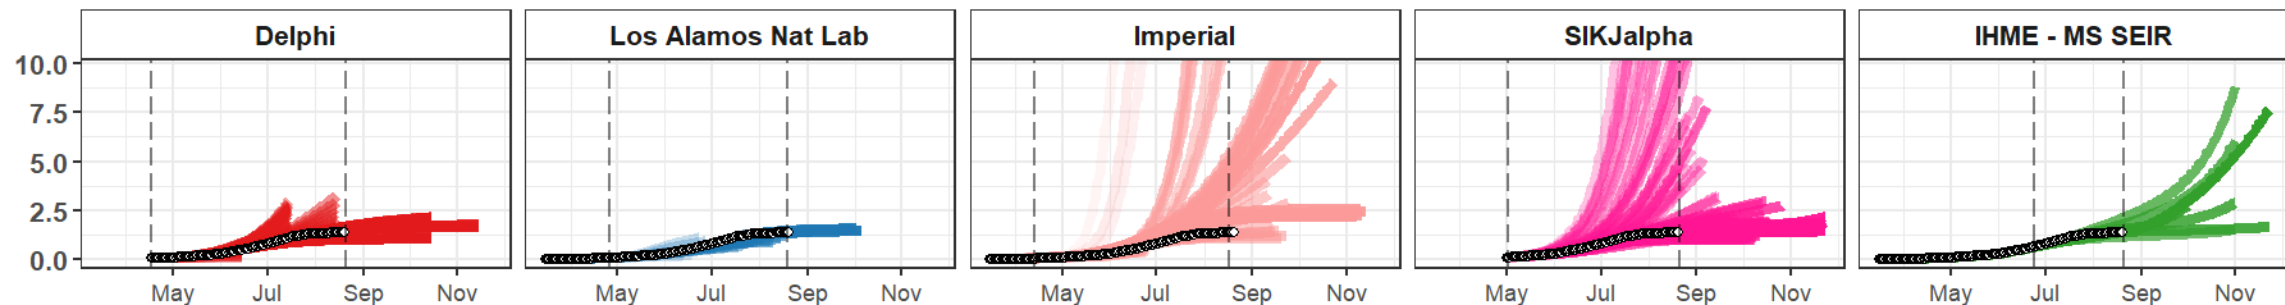

## All Cumulative Errors

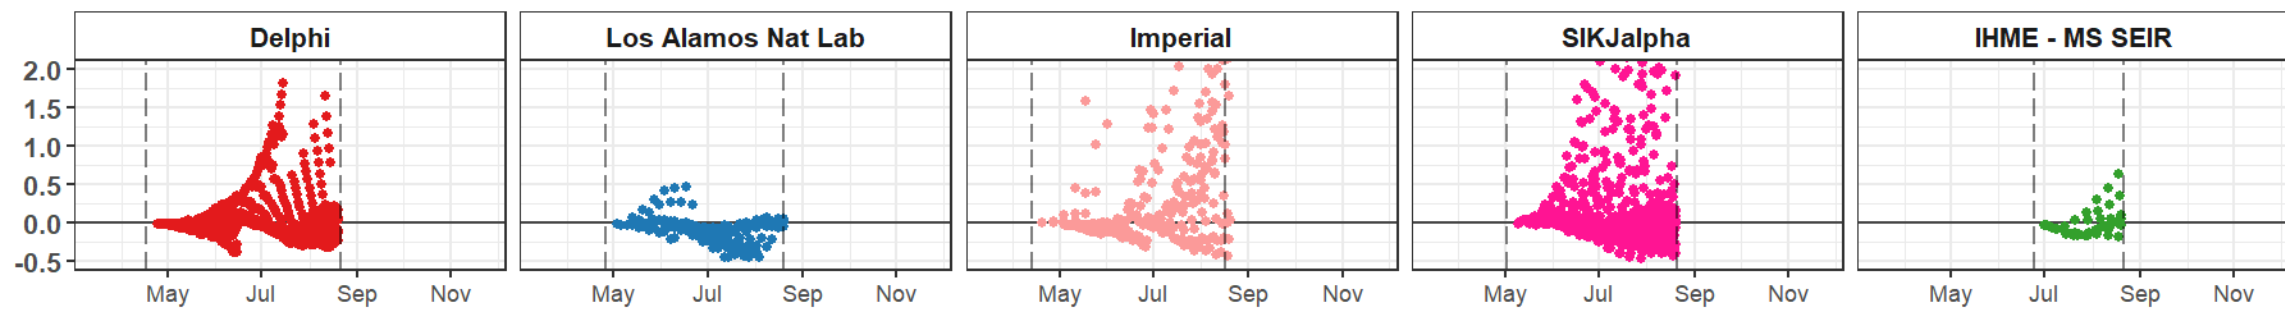

# Nevada

## Current Forecast

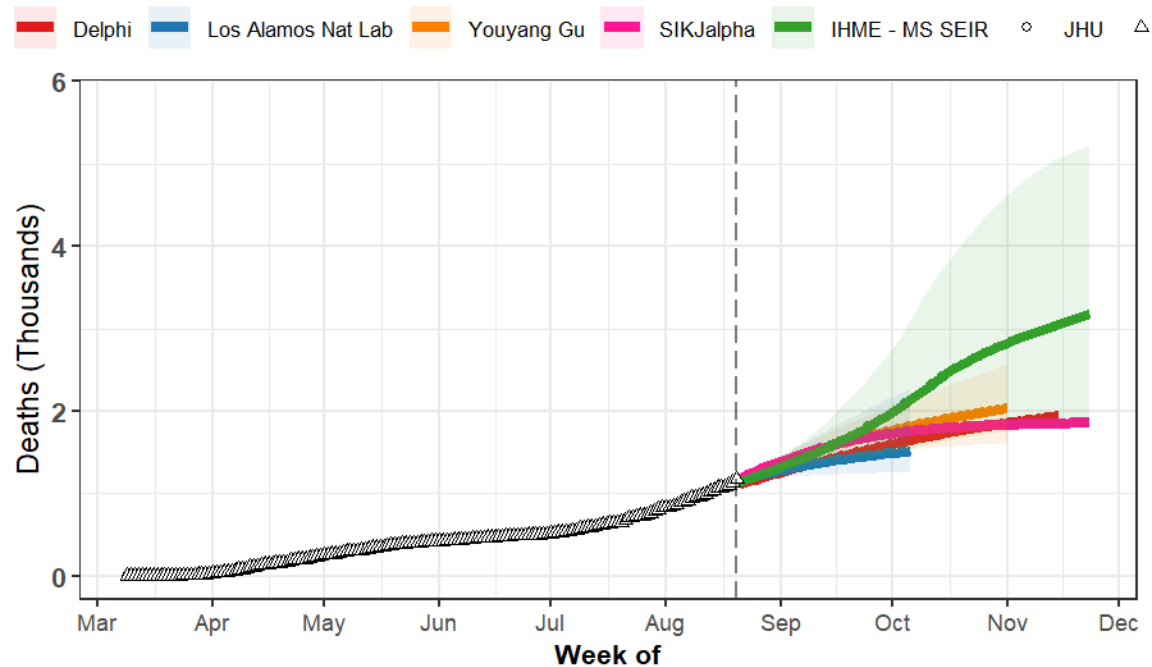

## Cumulative Out-Of-Sample Error (Post Intercept Shift)

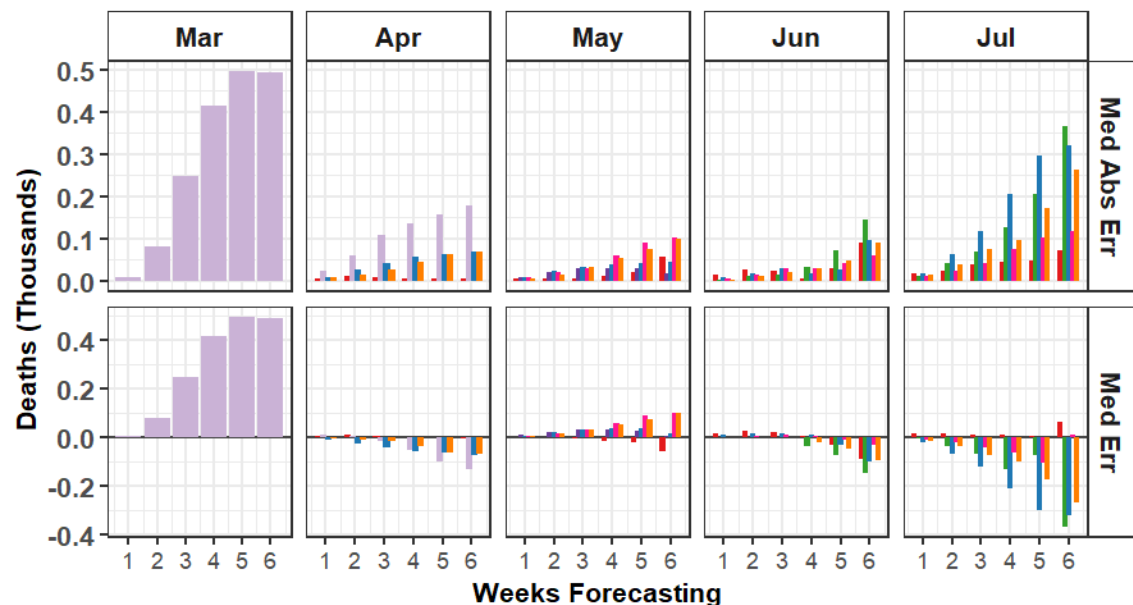

## All Model Versions

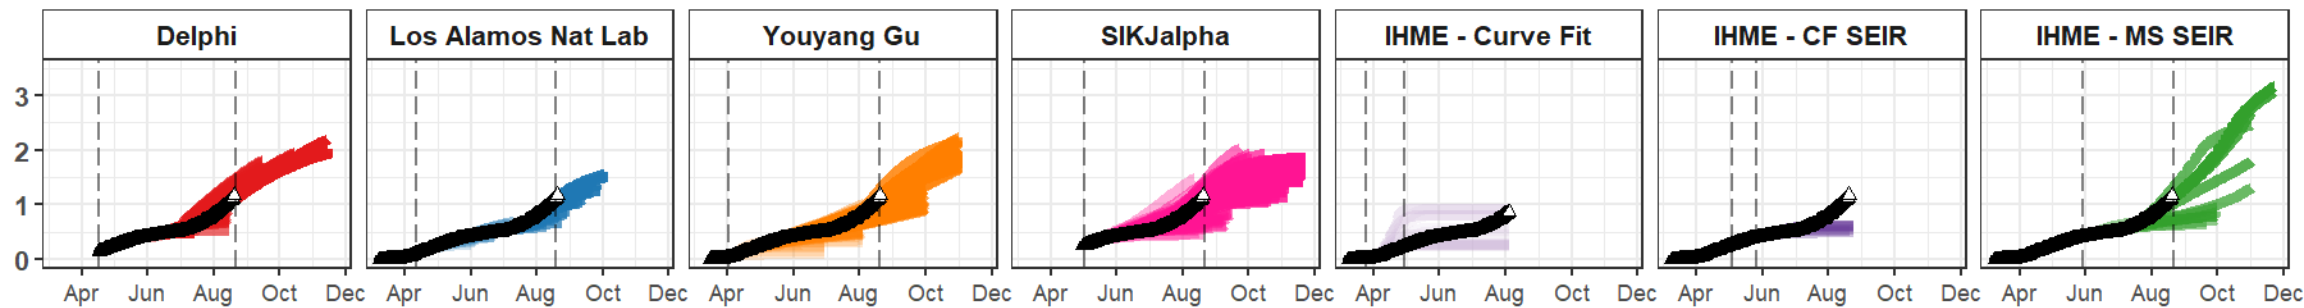

## All Cumulative Errors

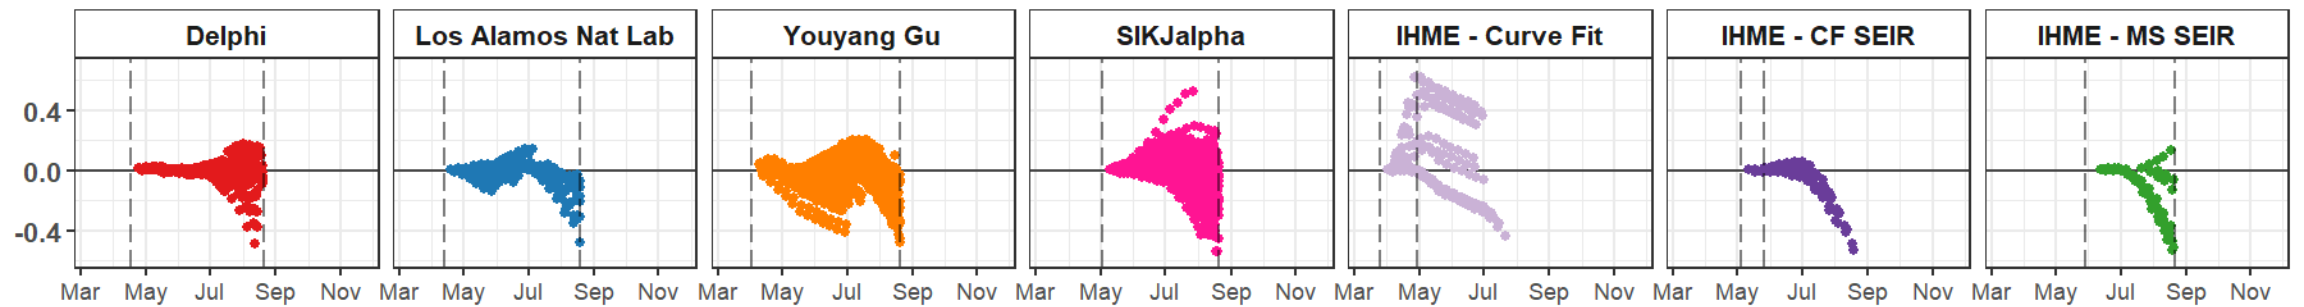

# Japan

## Current Forecast

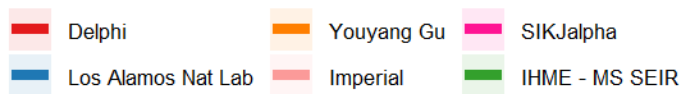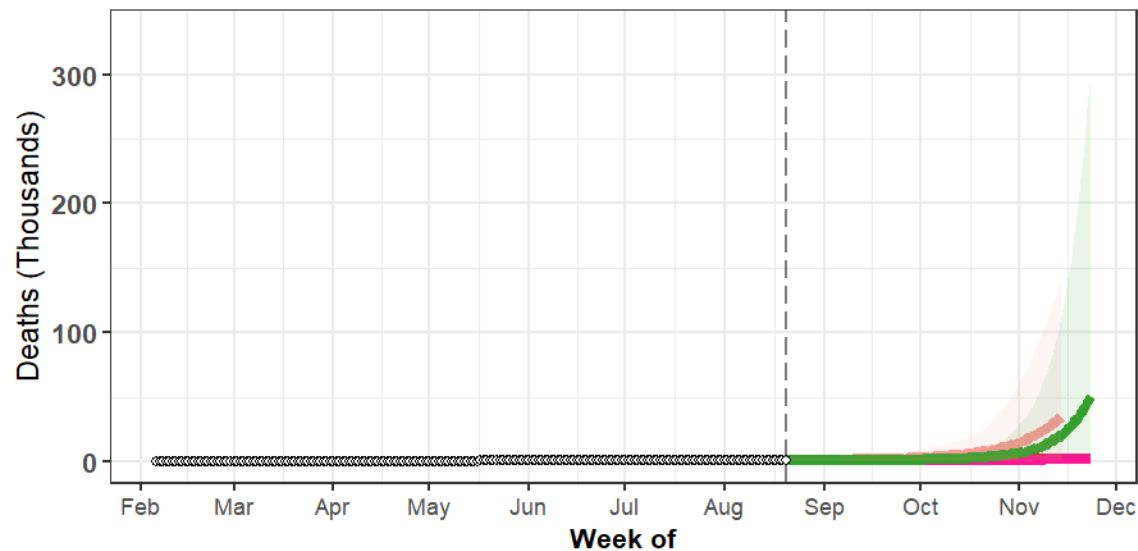

## Cumulative Out-Of-Sample Error (Post Intercept Shift)

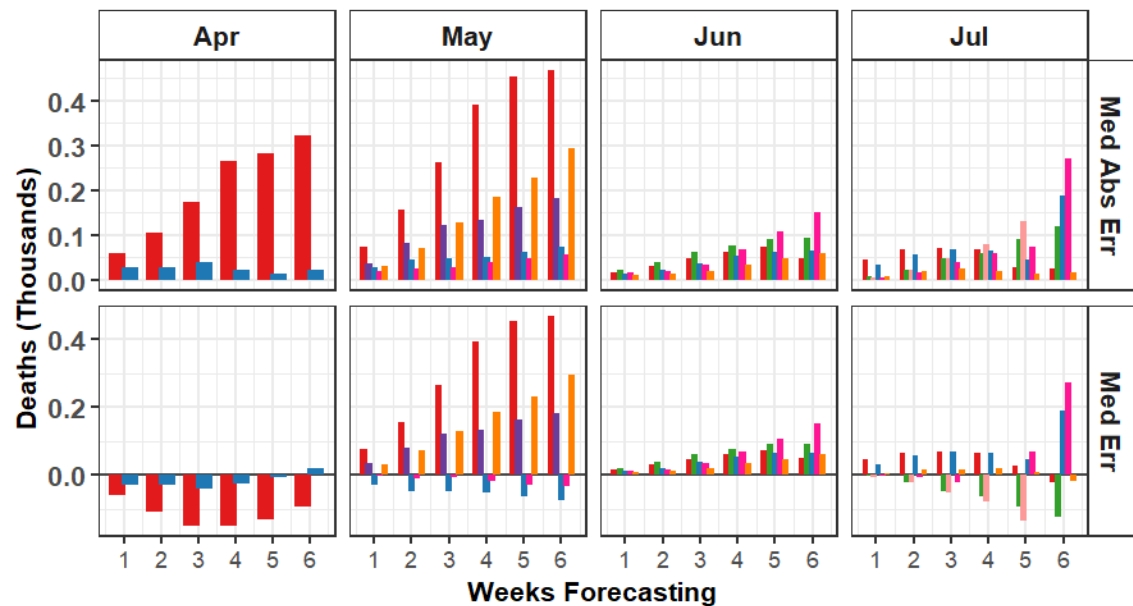

## All Model Versions

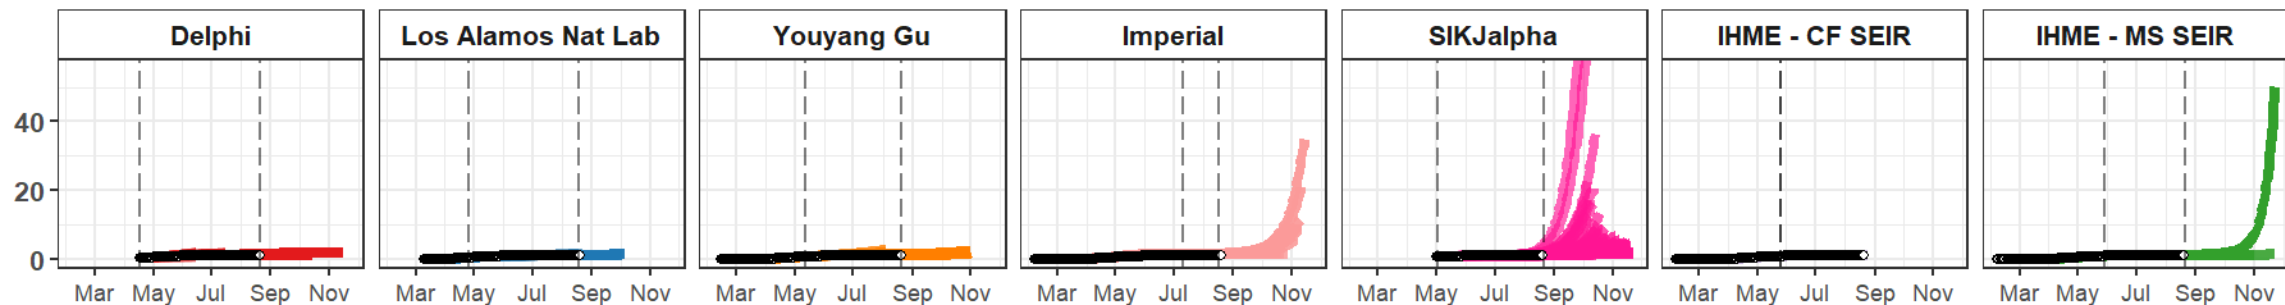

## All Cumulative Errors

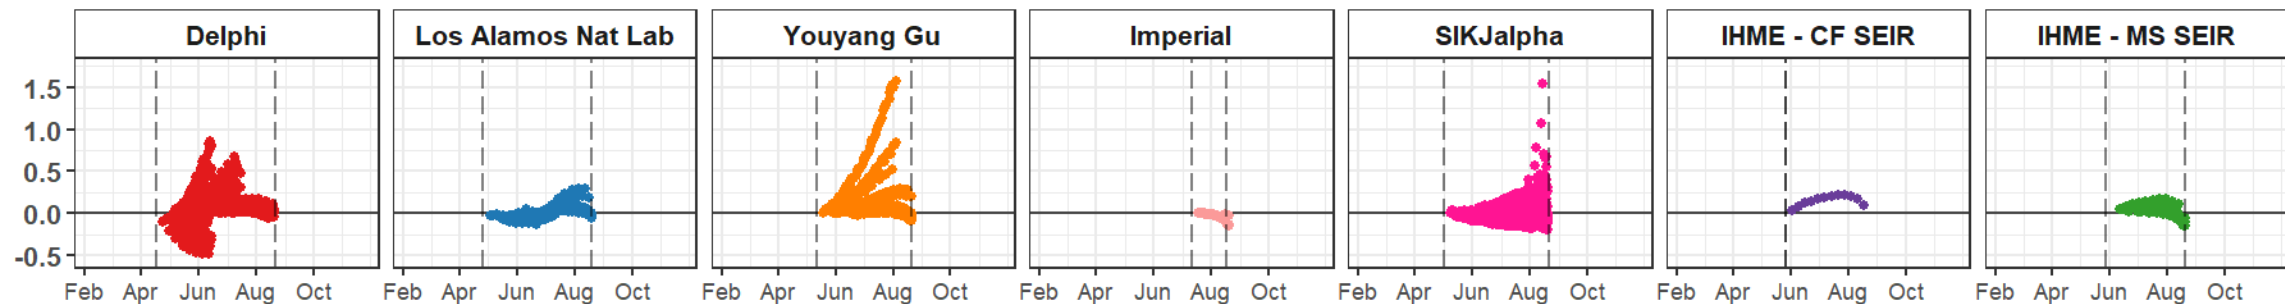

# Wisconsin

## Current Forecast

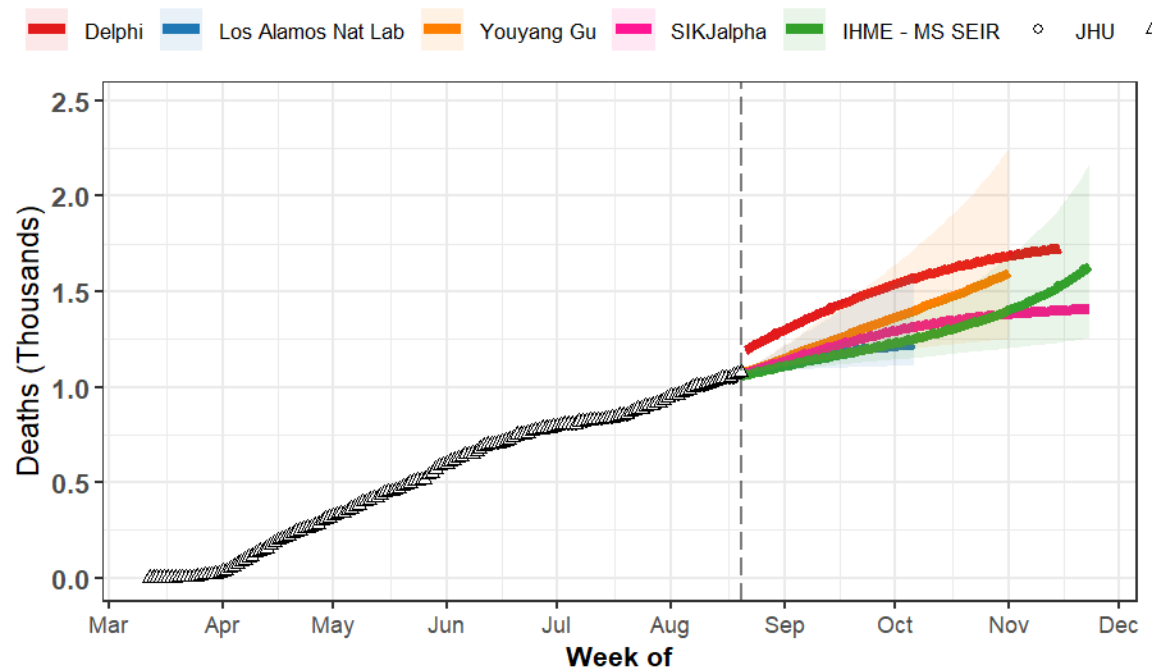

## Cumulative Out-Of-Sample Error (Post Intercept Shift)

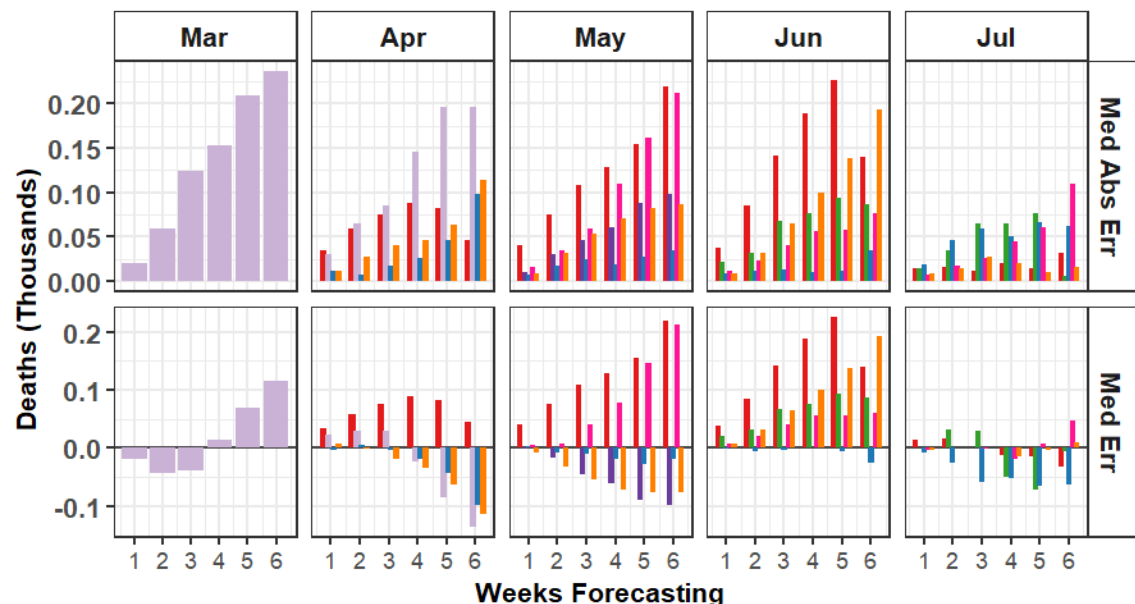

## All Model Versions

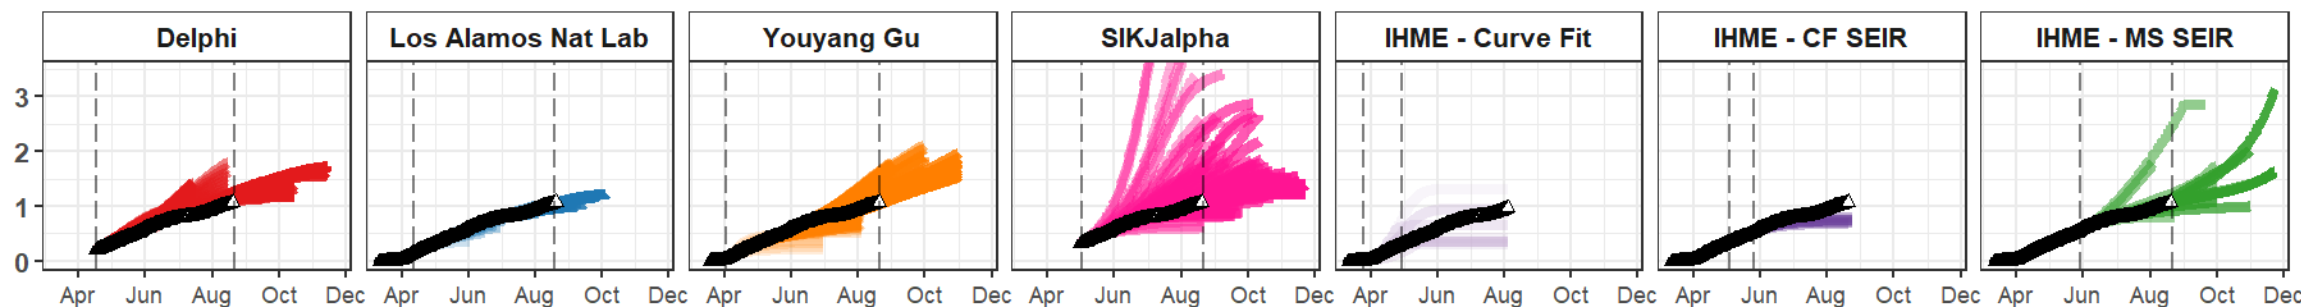

## All Cumulative Errors

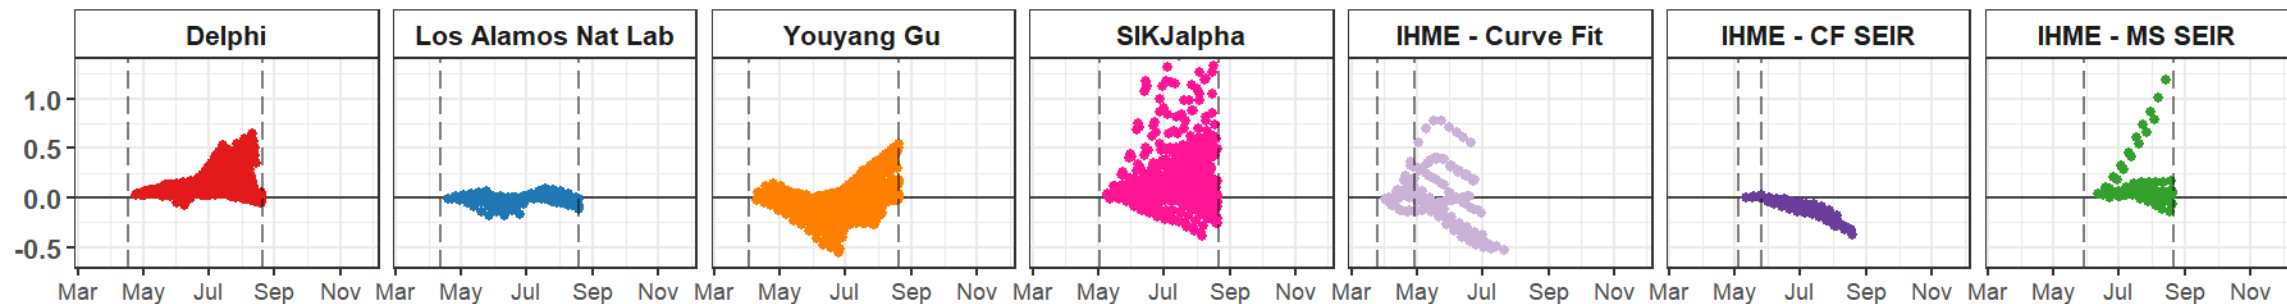



# Rhode Island

## Current Forecast

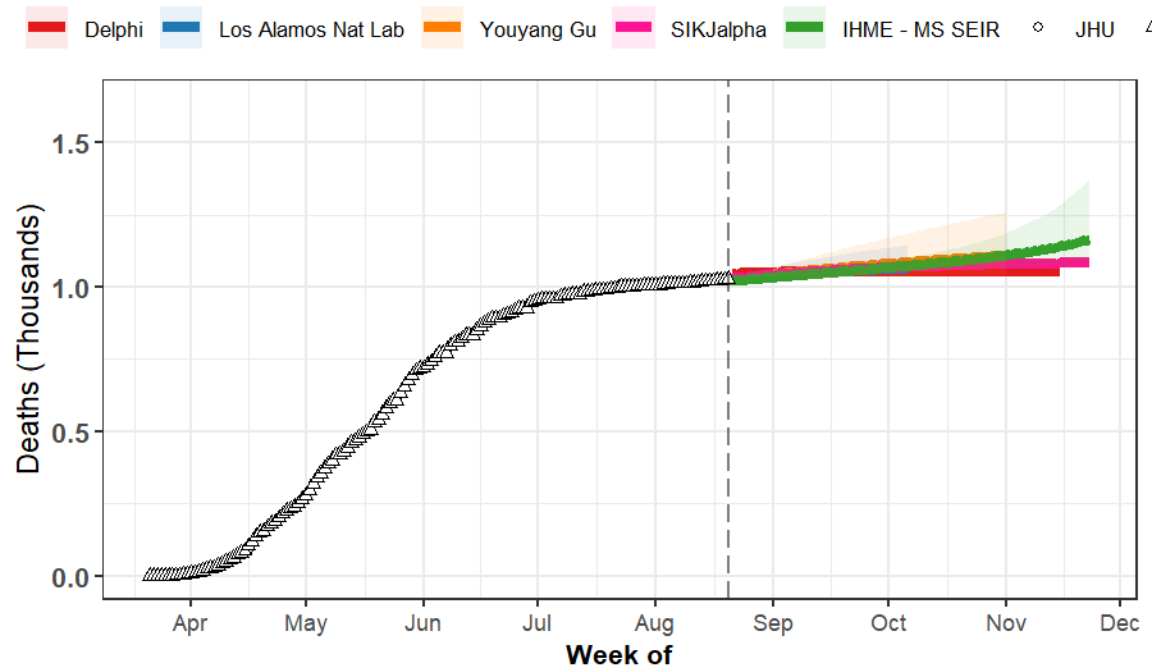

## Cumulative Out-Of-Sample Error (Post Intercept Shift)

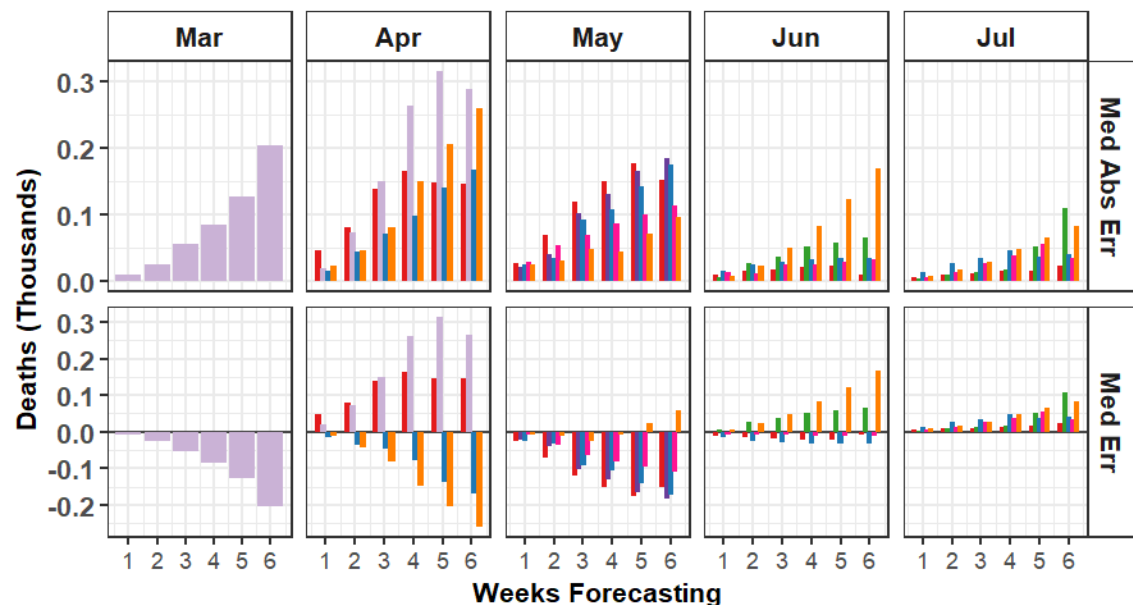

## All Model Versions

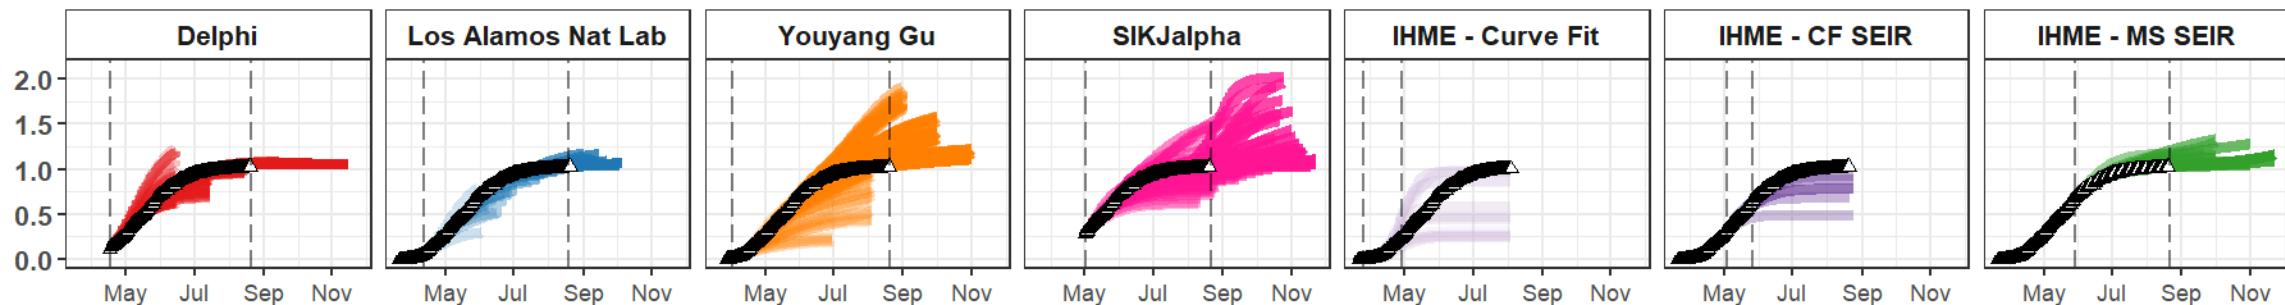

## All Cumulative Errors

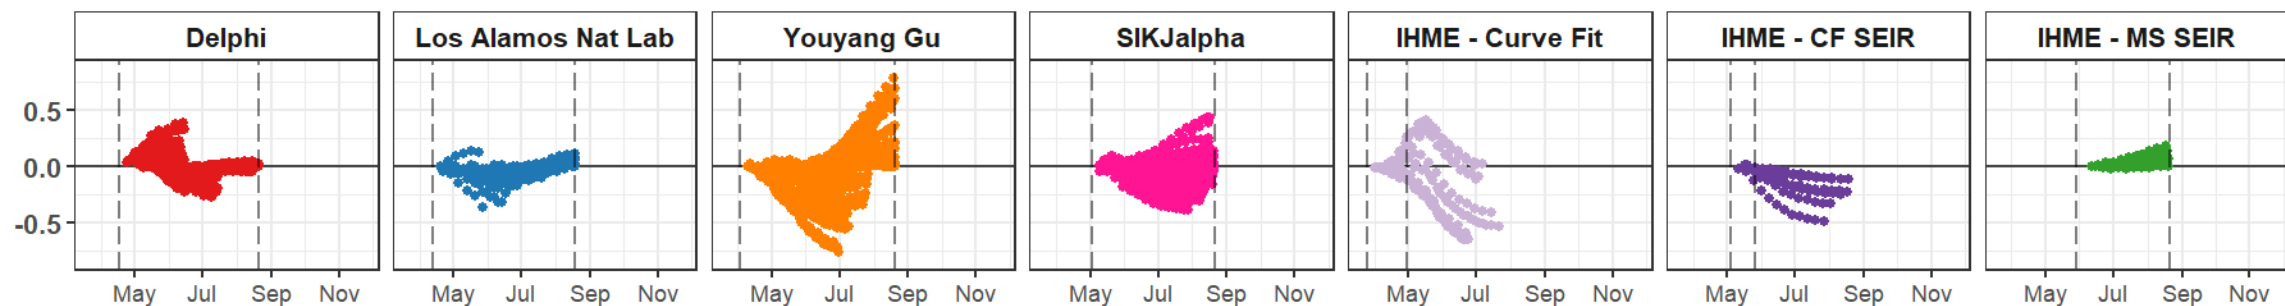

# Iowa

## Current Forecast

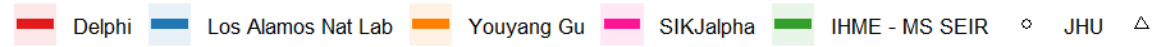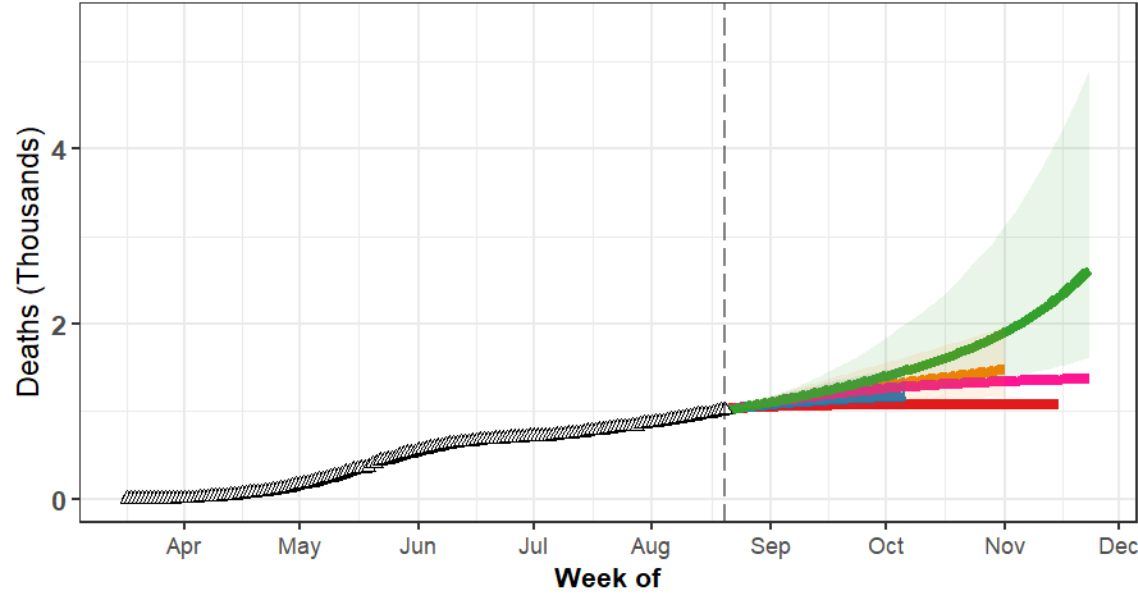

## Cumulative Out-Of-Sample Error (Post Intercept Shift)

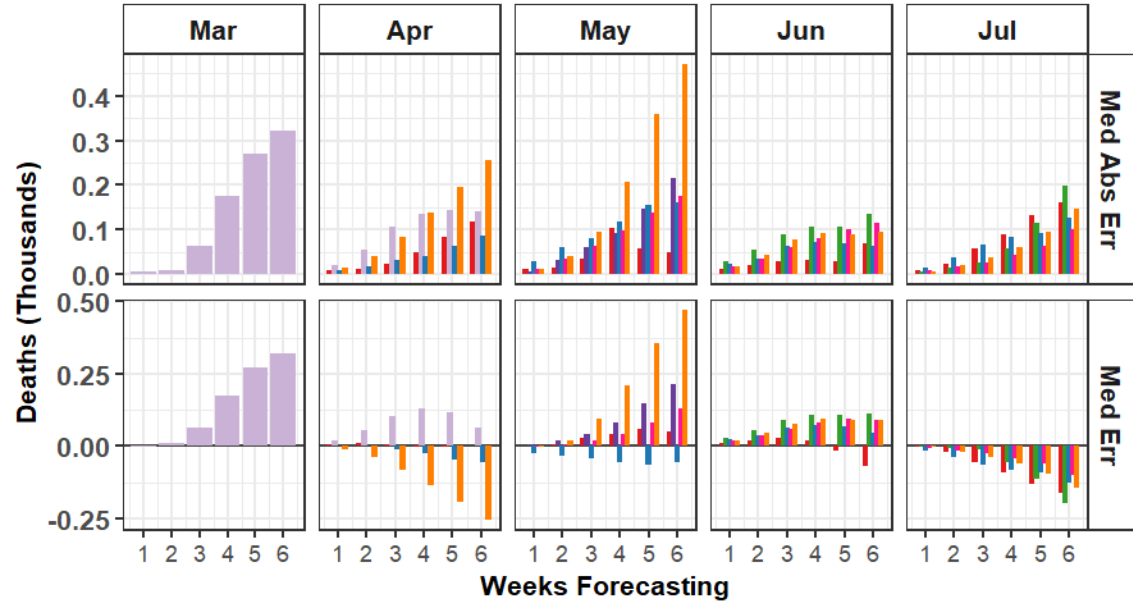

## All Model Versions

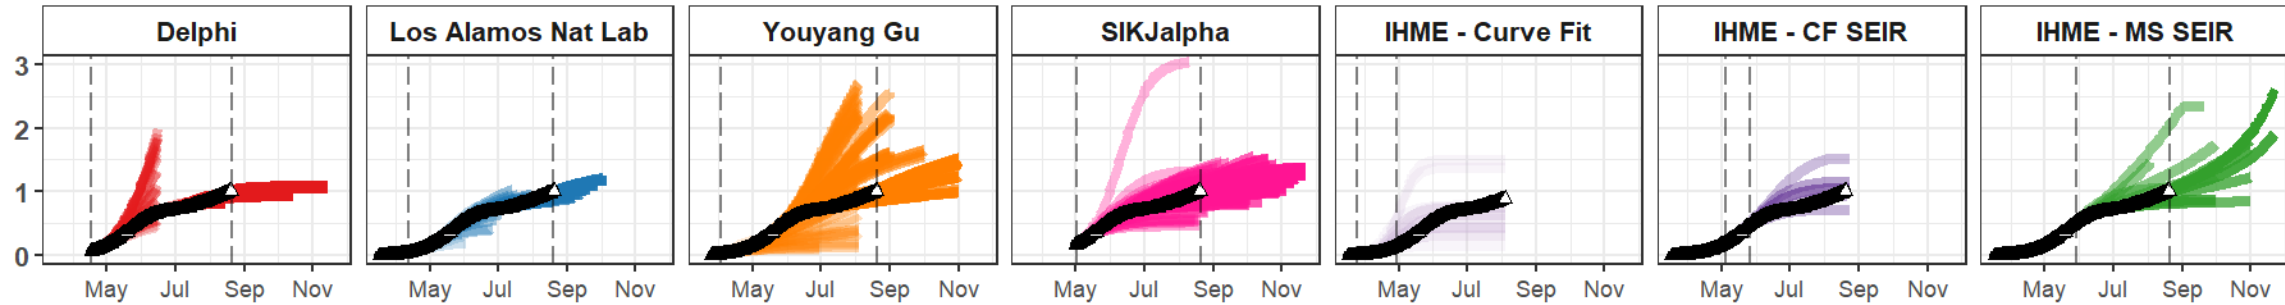

## All Cumulative Errors

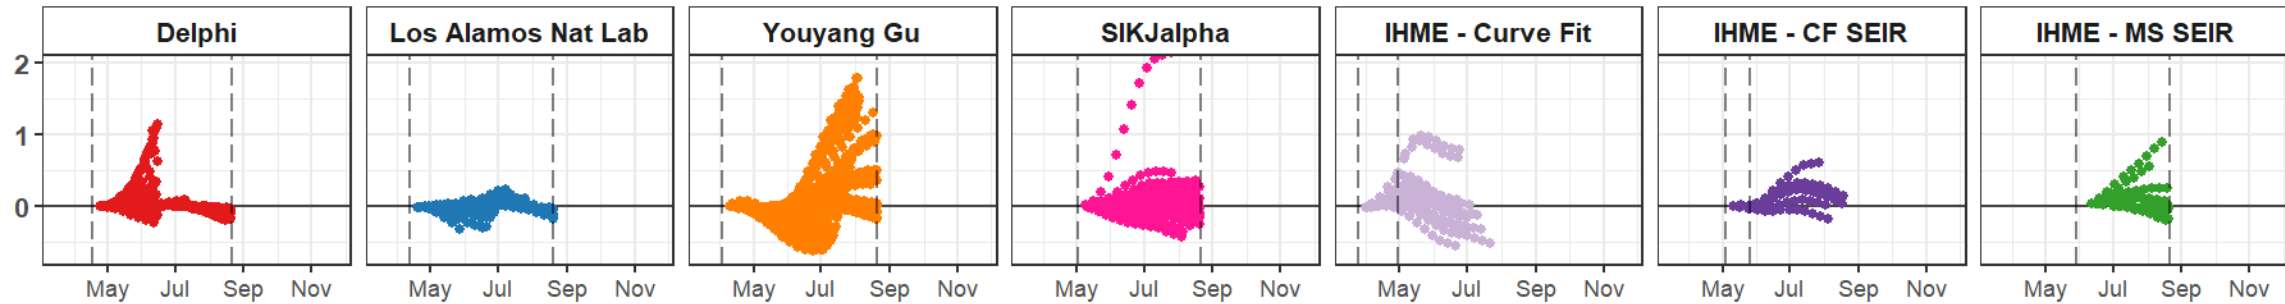

# Nigeria

## Current Forecast

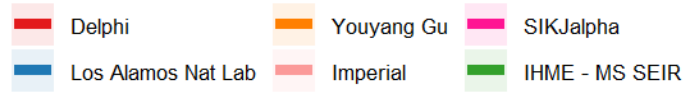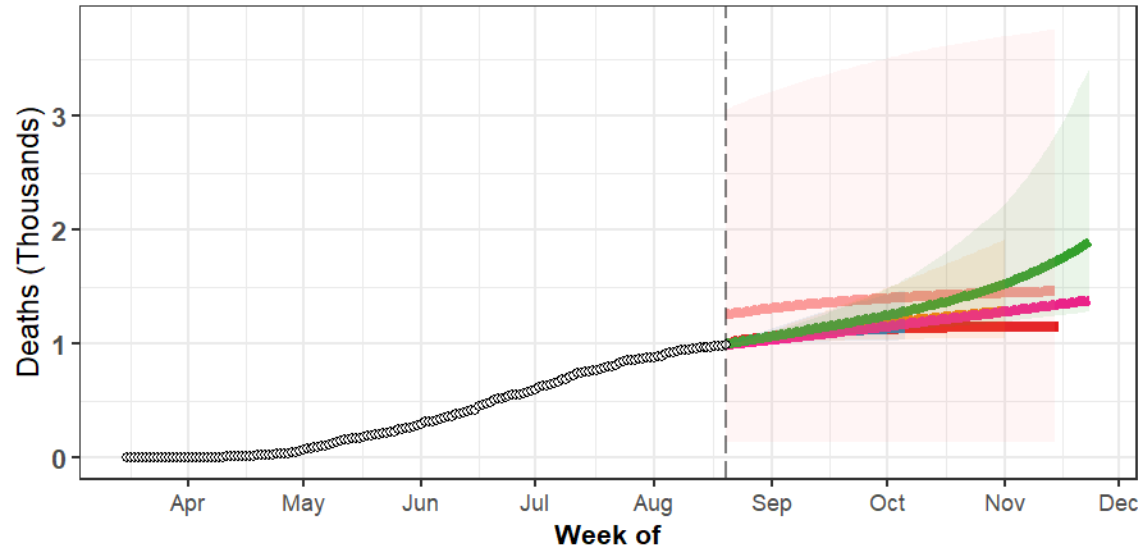

## Cumulative Out-Of-Sample Error (Post Intercept Shift)

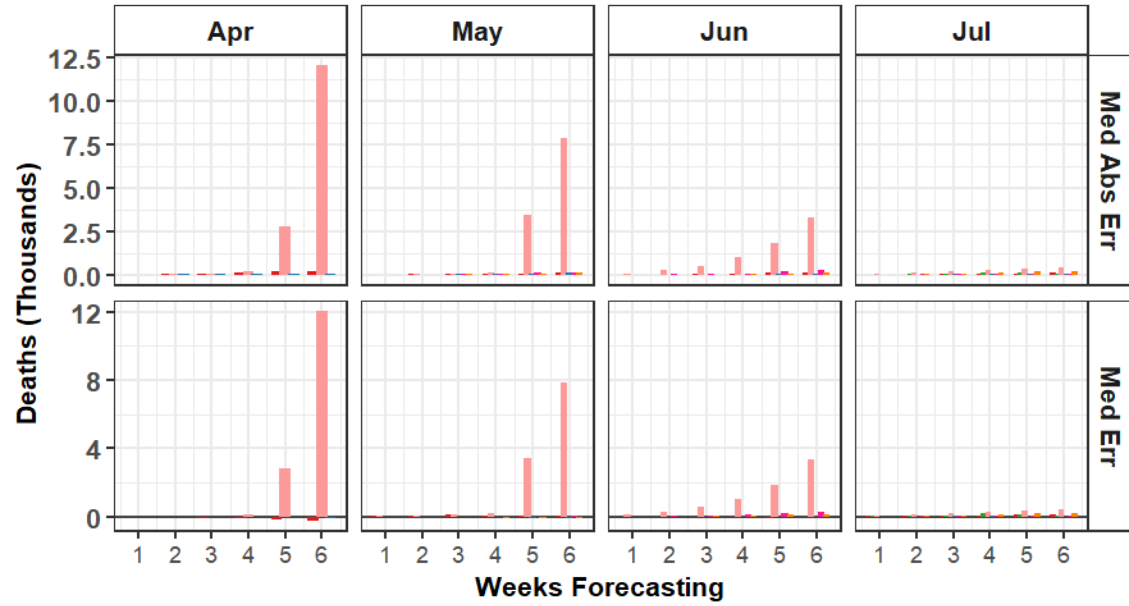

## All Model Versions

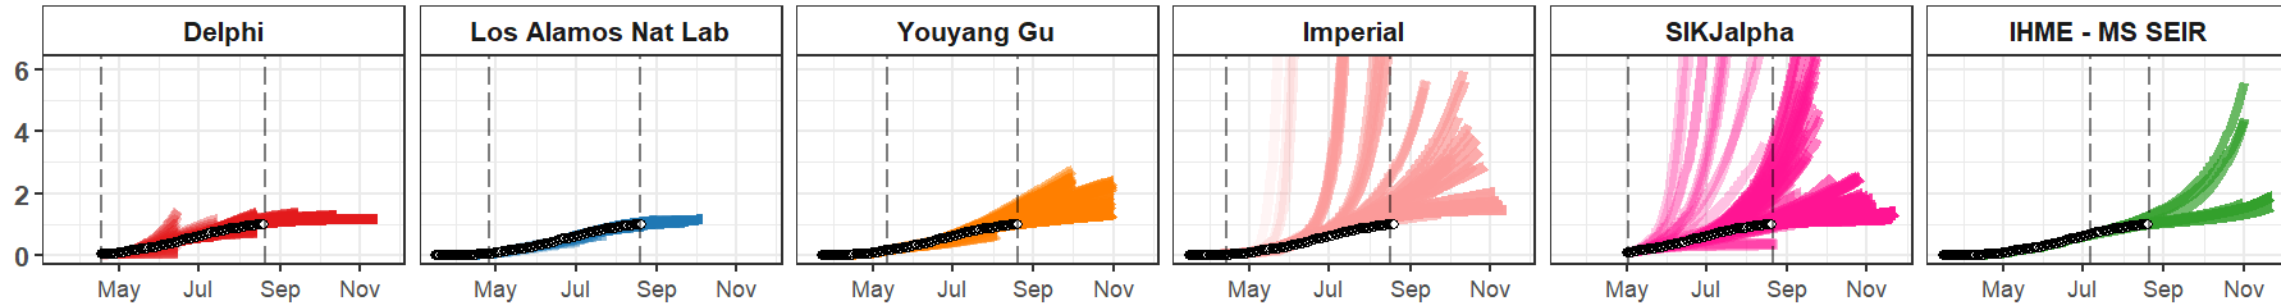

## All Cumulative Errors

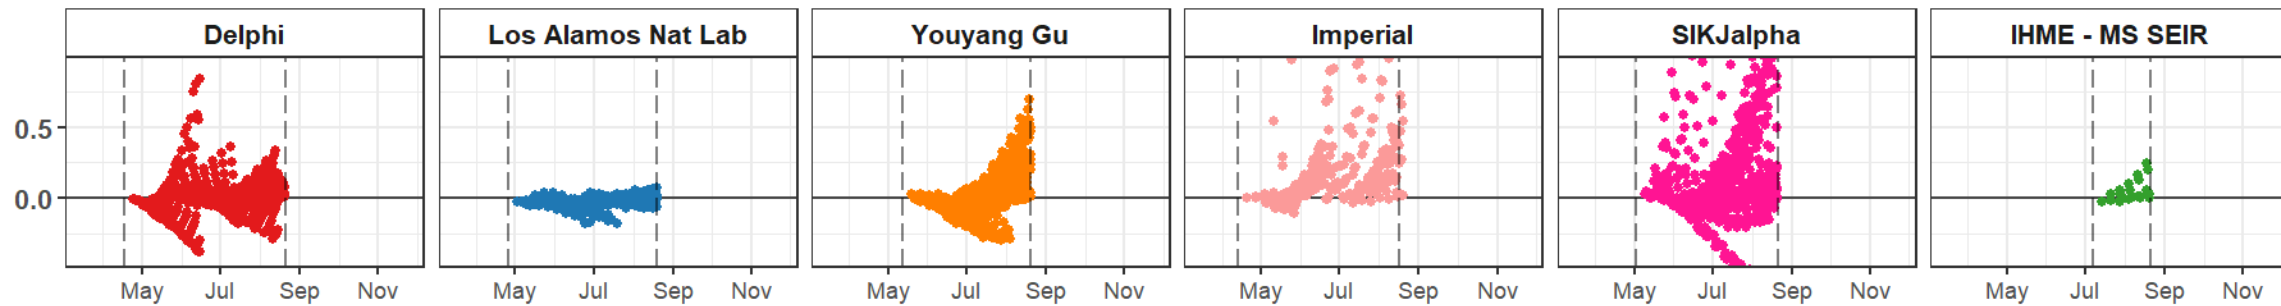

# Moldova

## Current Forecast

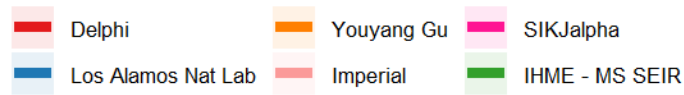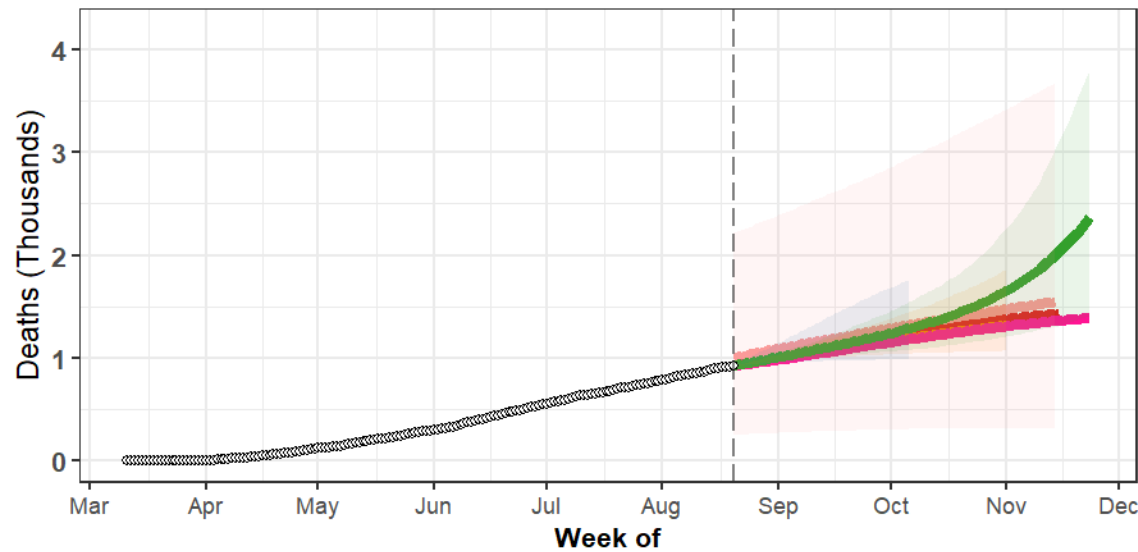

## Cumulative Out-Of-Sample Error (Post Intercept Shift)

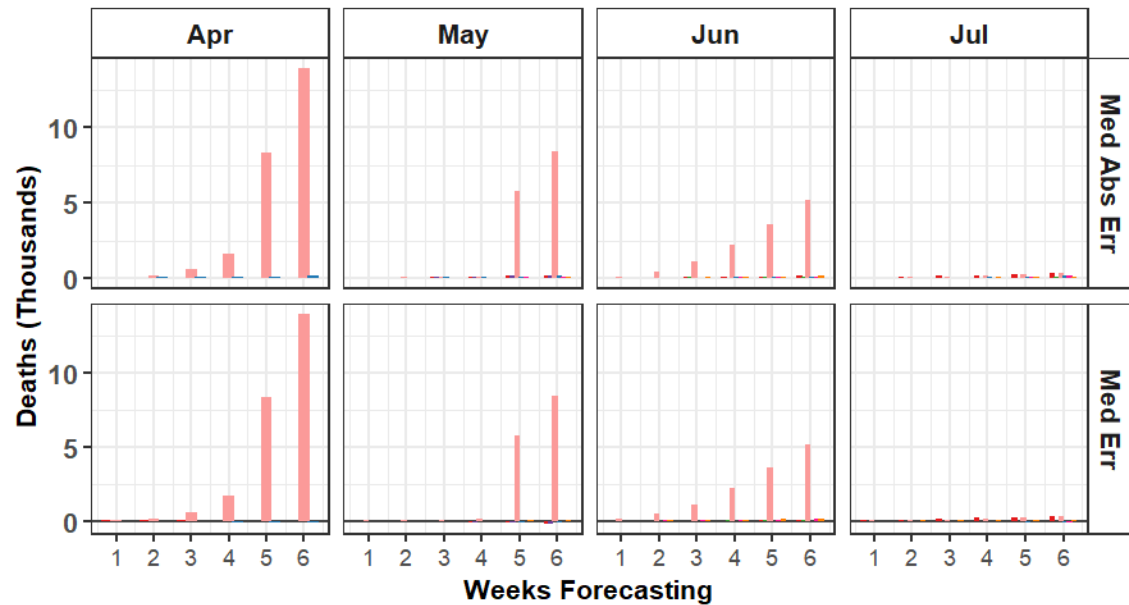

## All Model Versions

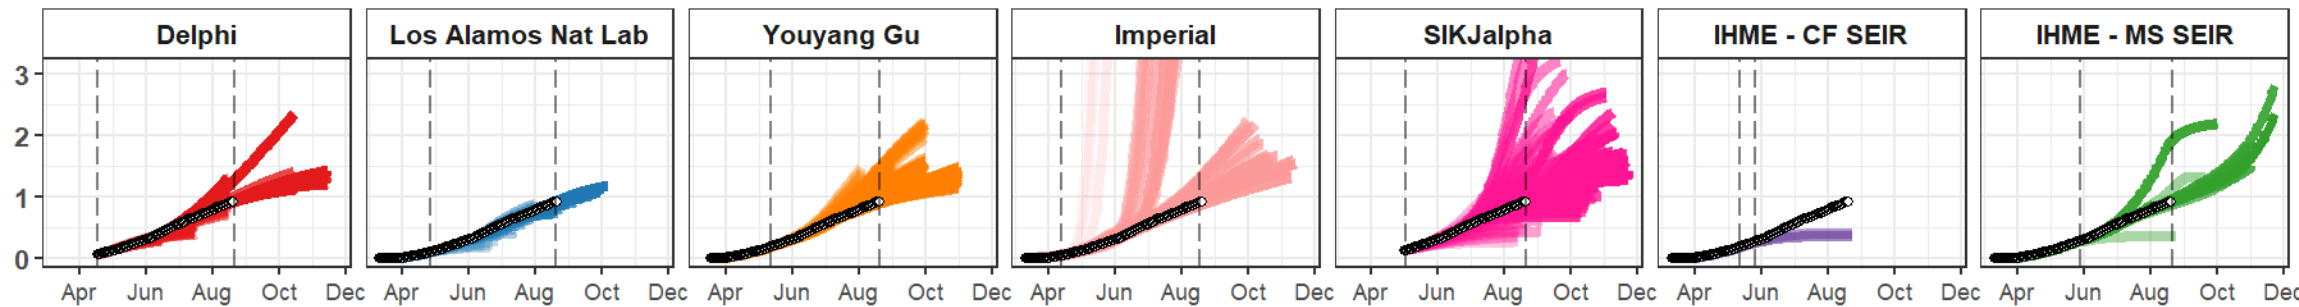

## All Cumulative Errors

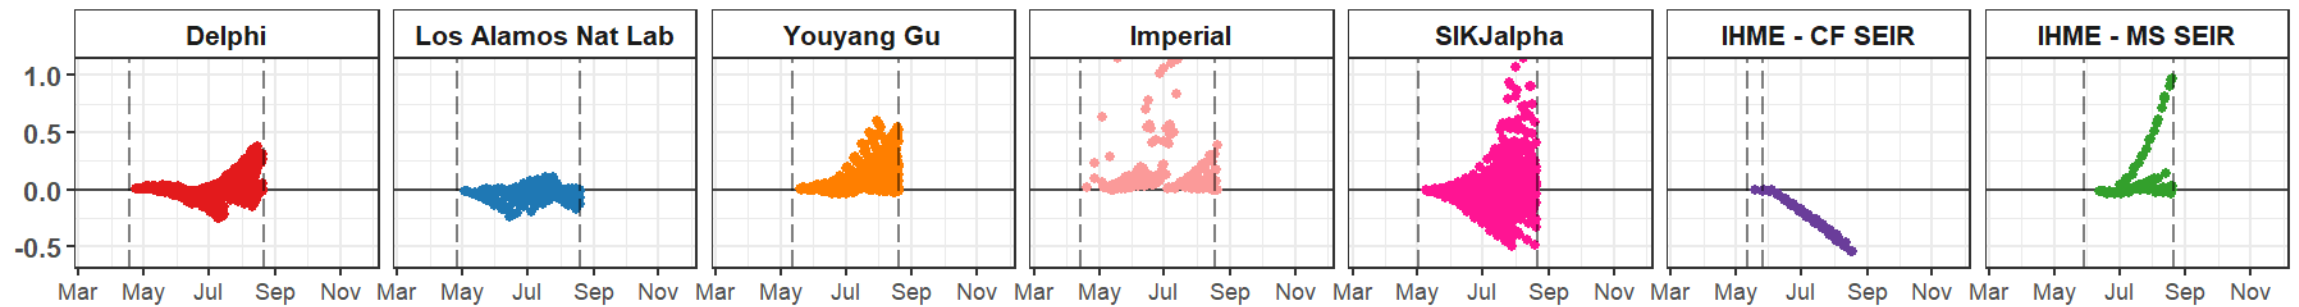

# Kentucky

## Current Forecast

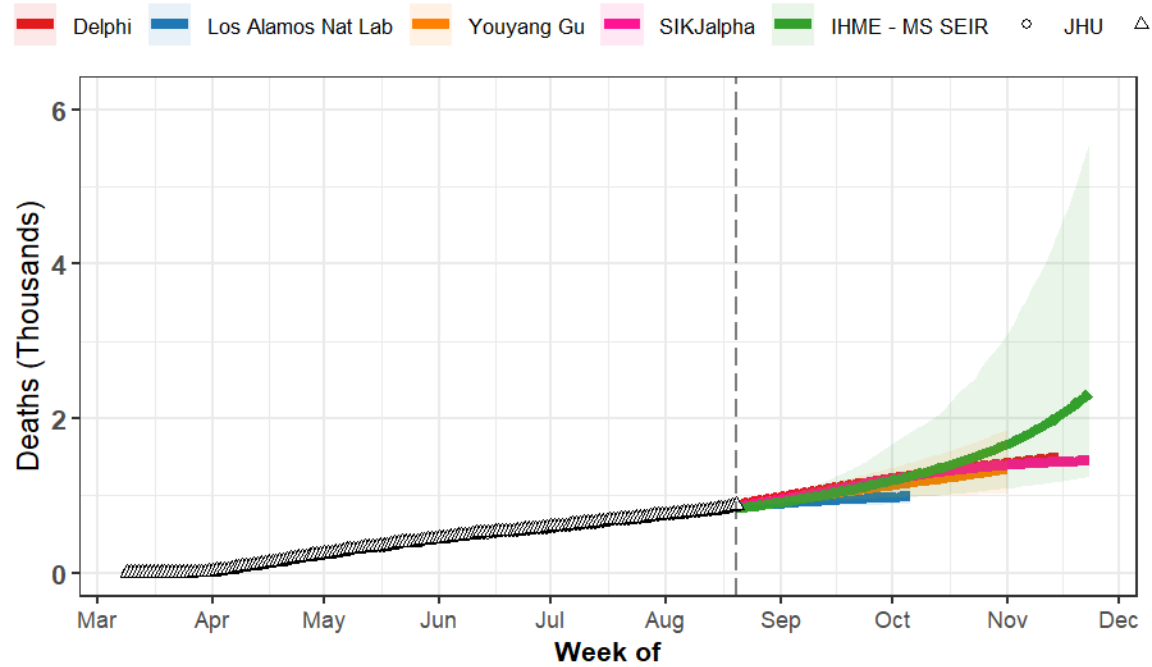

## Cumulative Out-Of-Sample Error (Post Intercept Shift)

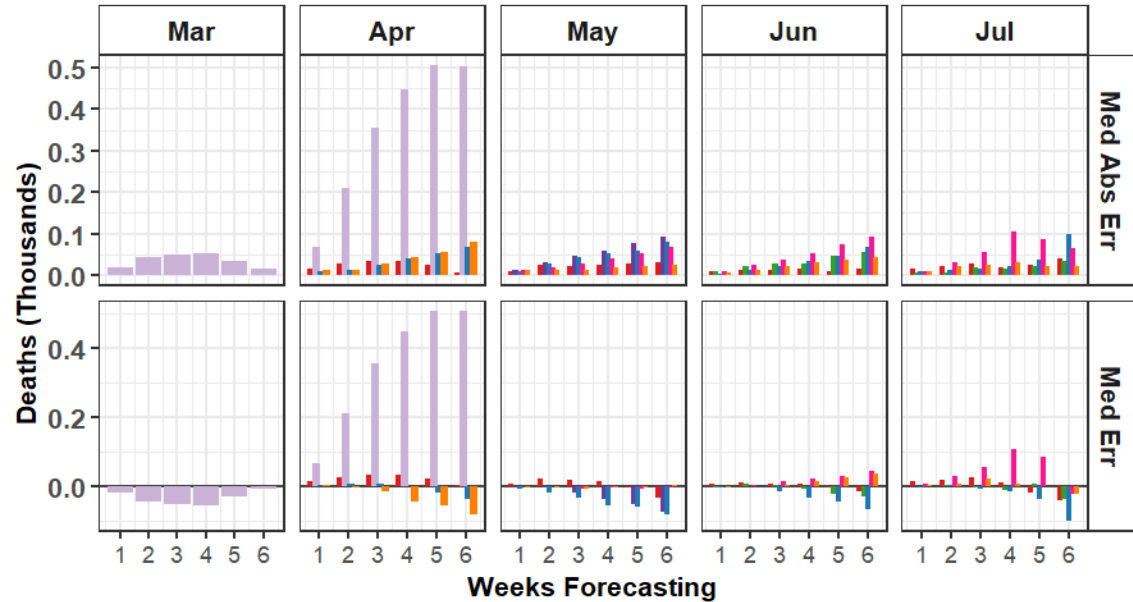

## All Model Versions

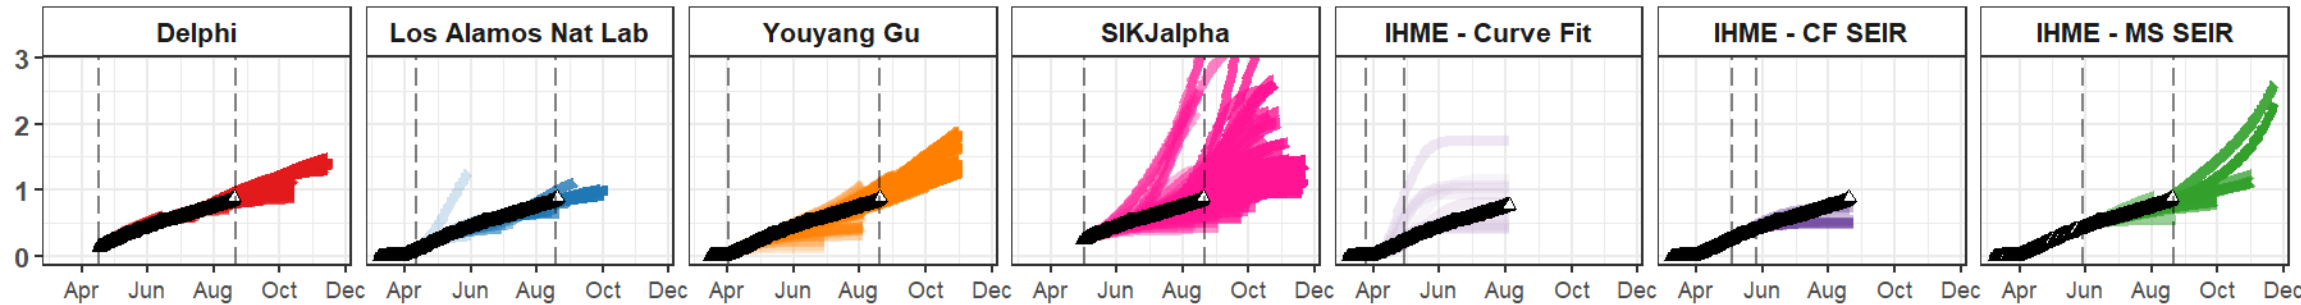

## All Cumulative Errors

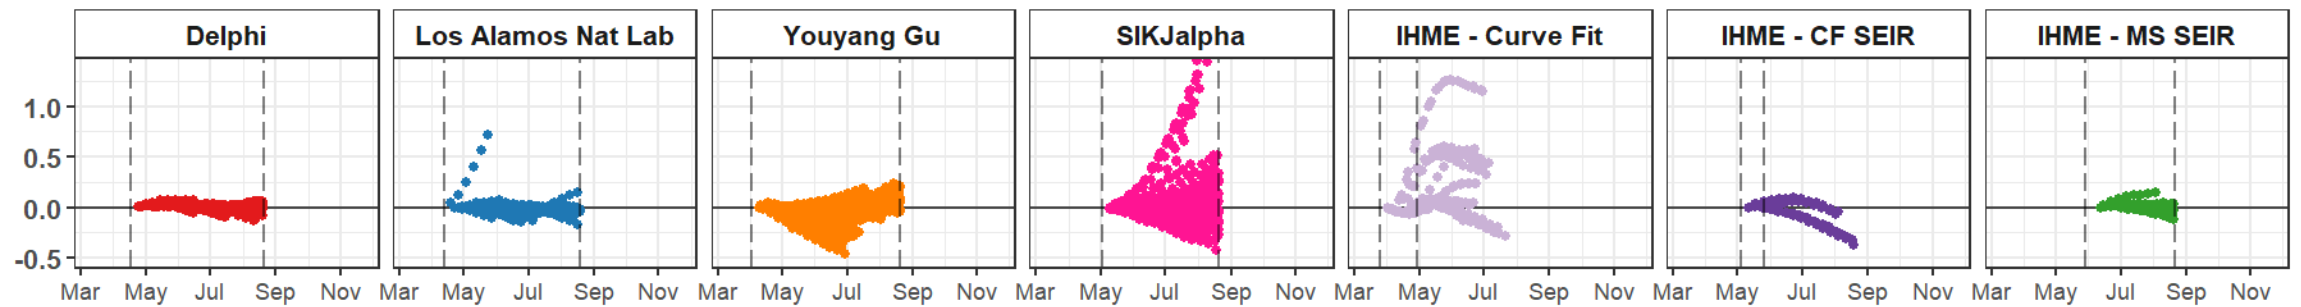

# Armenia

## Current Forecast

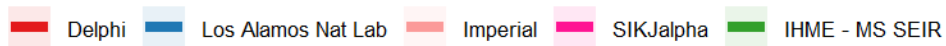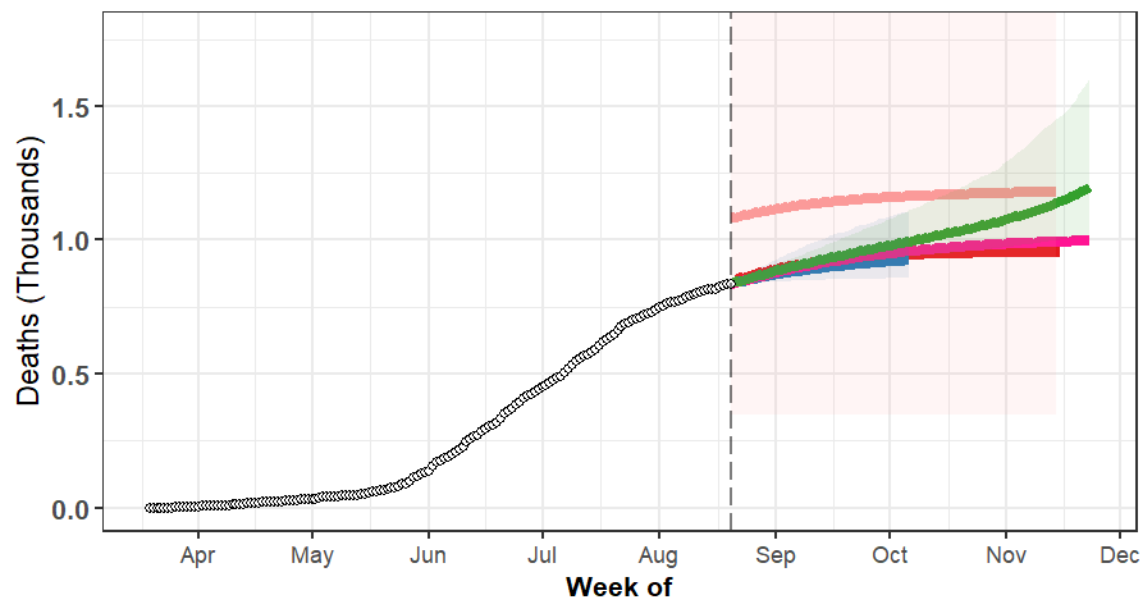

## Cumulative Out-Of-Sample Error (Post Intercept Shift)

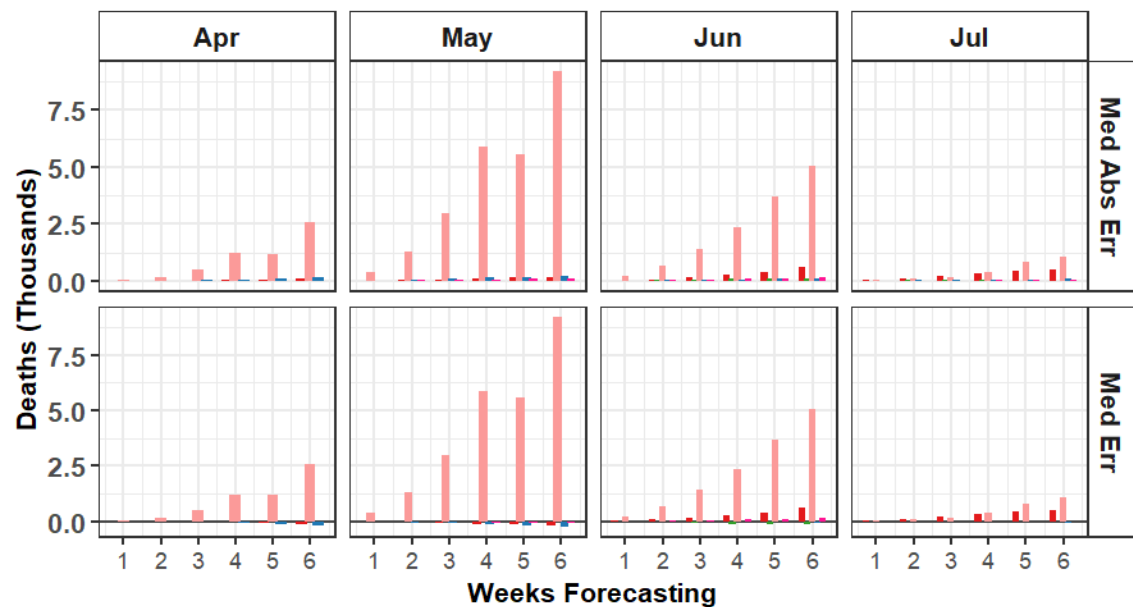

## All Model Versions

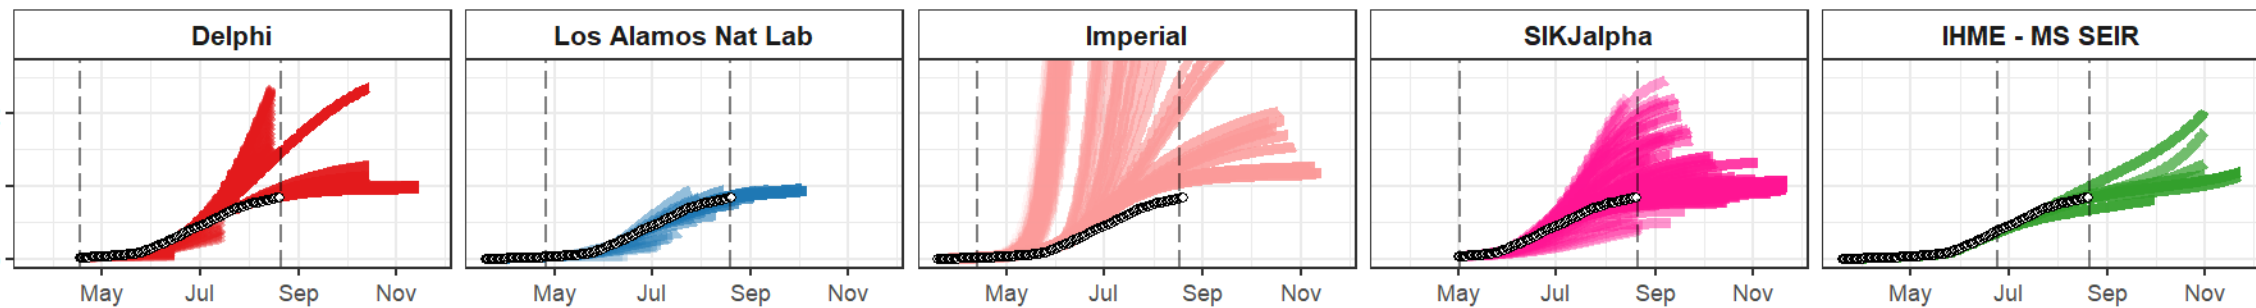

## All Cumulative Errors

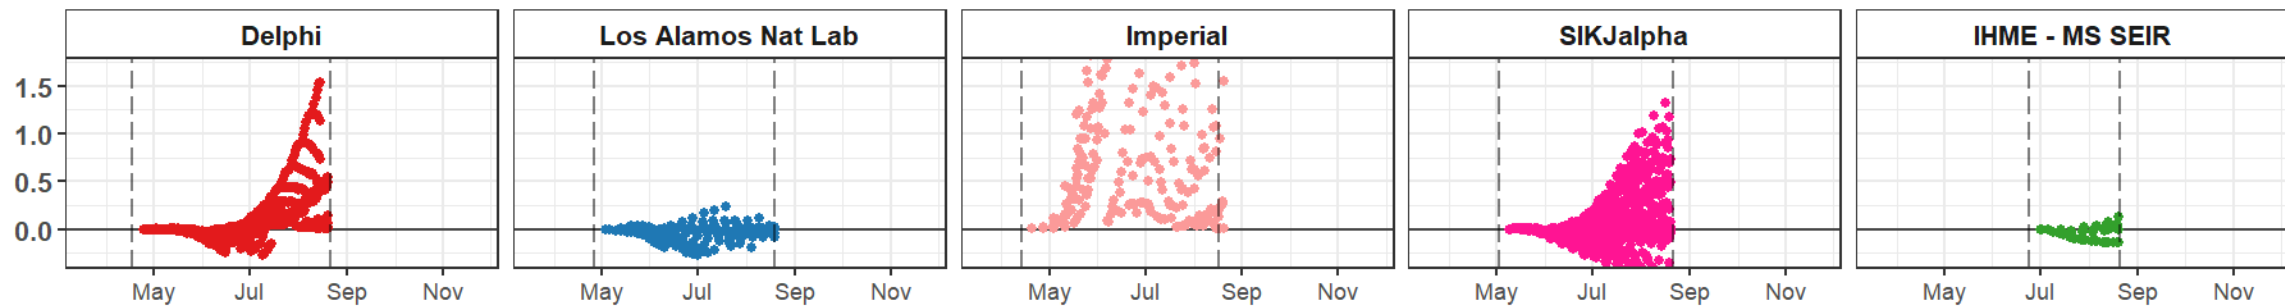

# Sudan

## Current Forecast

Delphi Los Alamos Nat Lab Imperial SIKJalpha IHME - MS SEIR

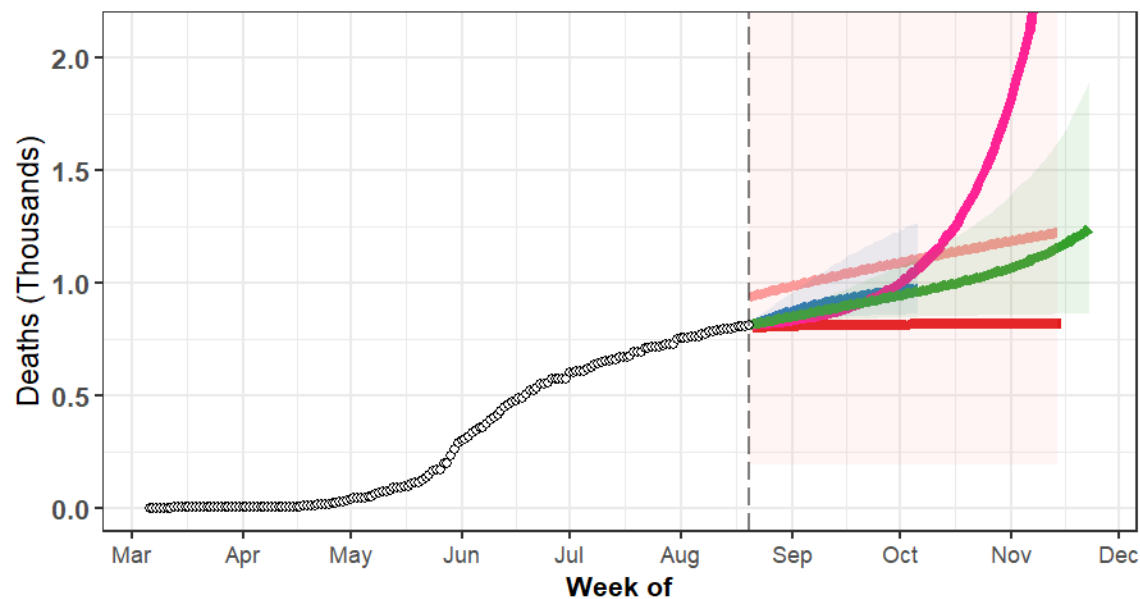

## Cumulative Out-Of-Sample Error (Post Intercept Shift)

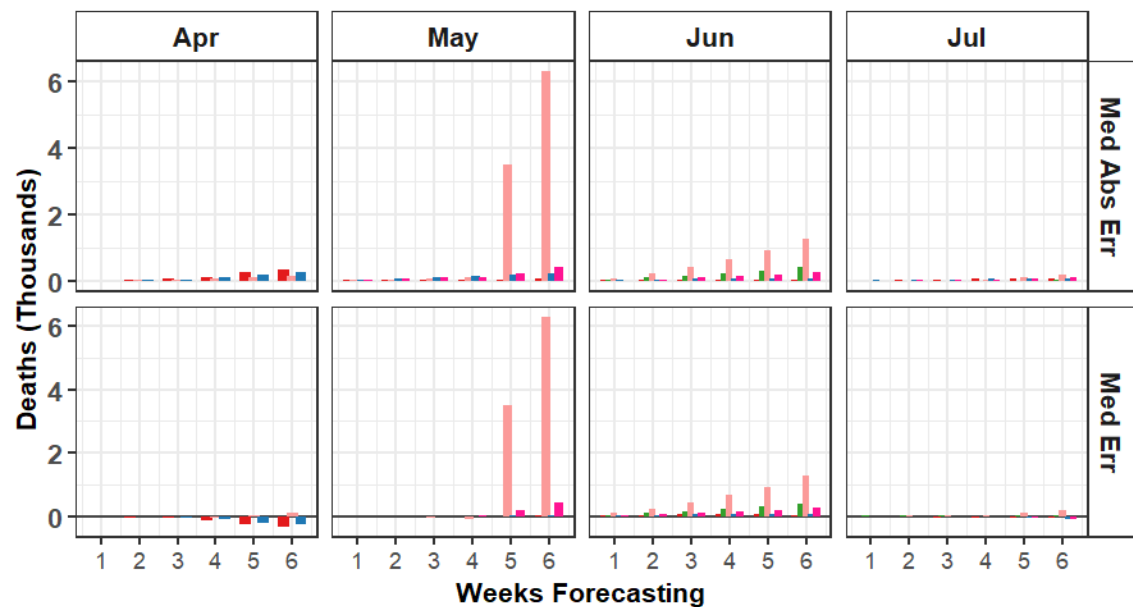

## All Model Versions

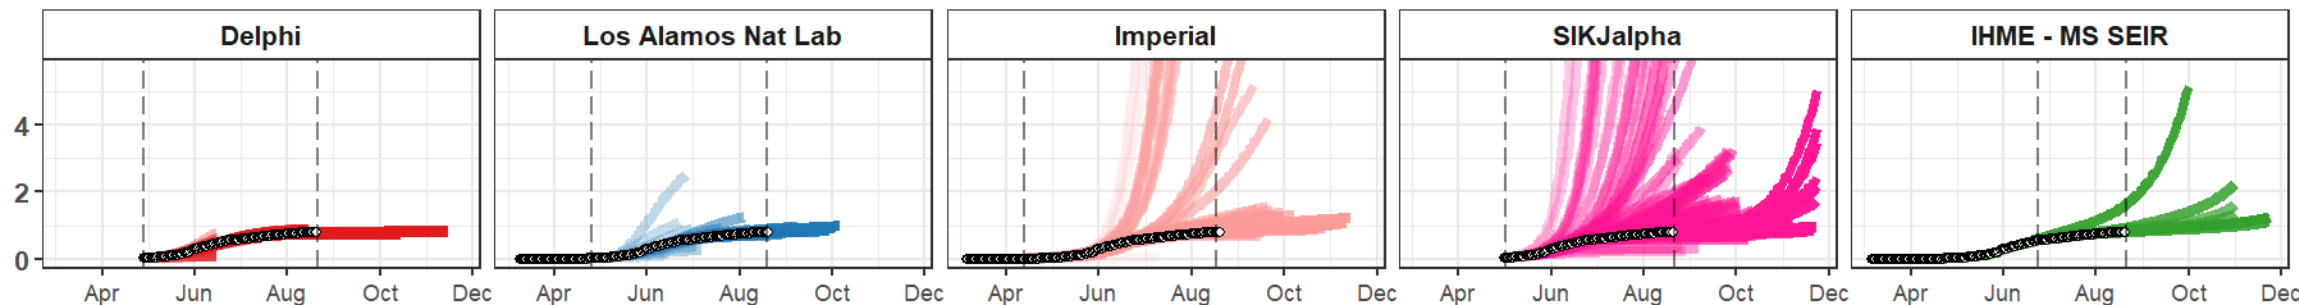

## All Cumulative Errors

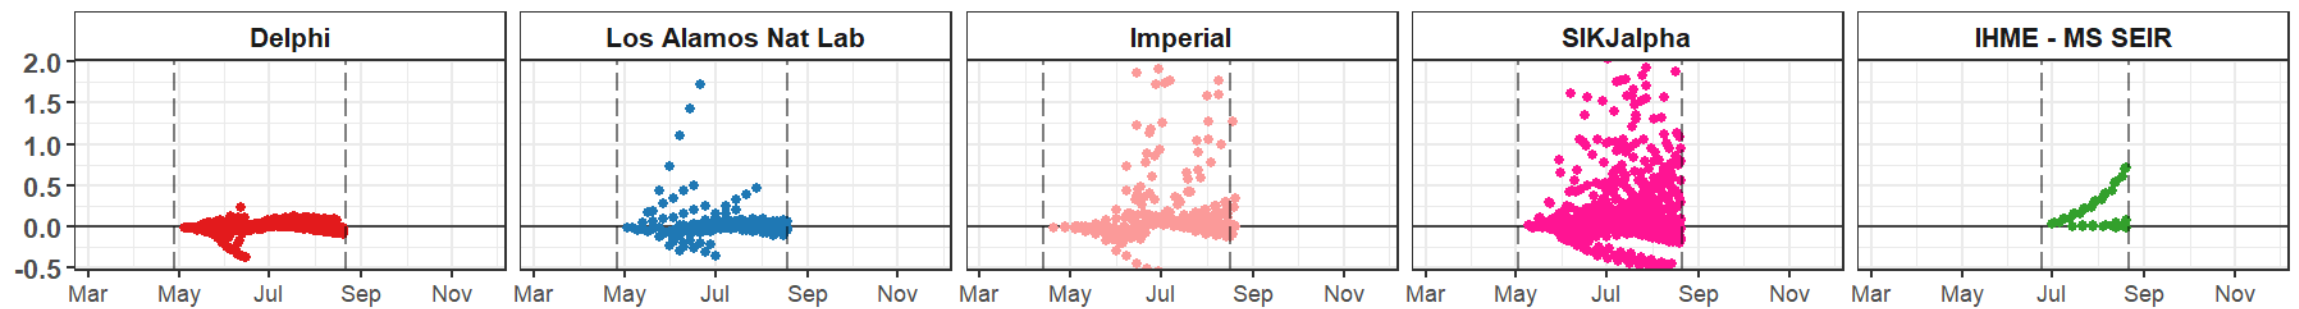

# Israel

## Current Forecast

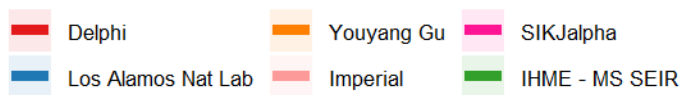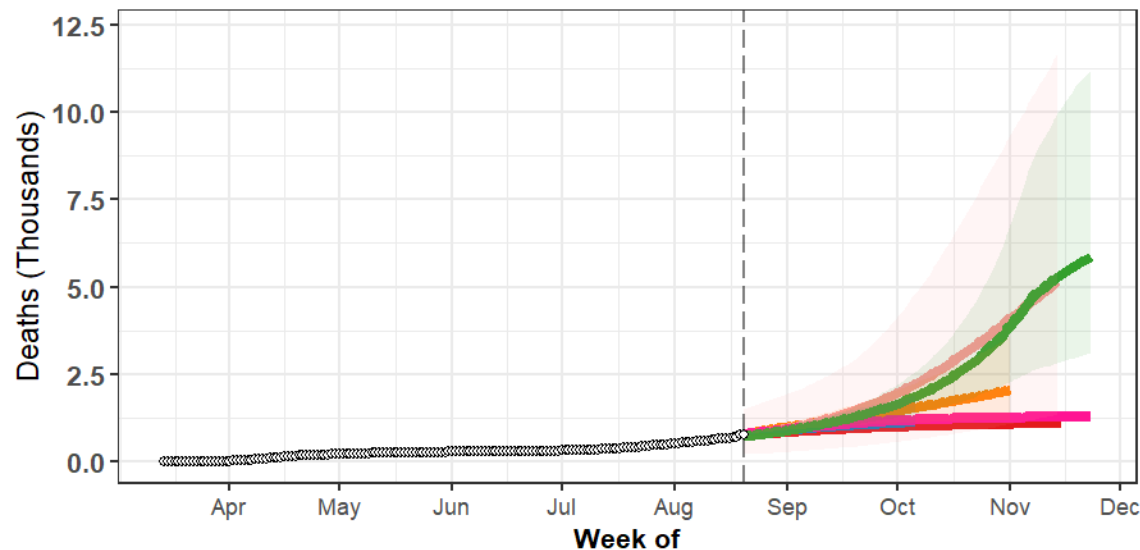

## Cumulative Out-Of-Sample Error (Post Intercept Shift)

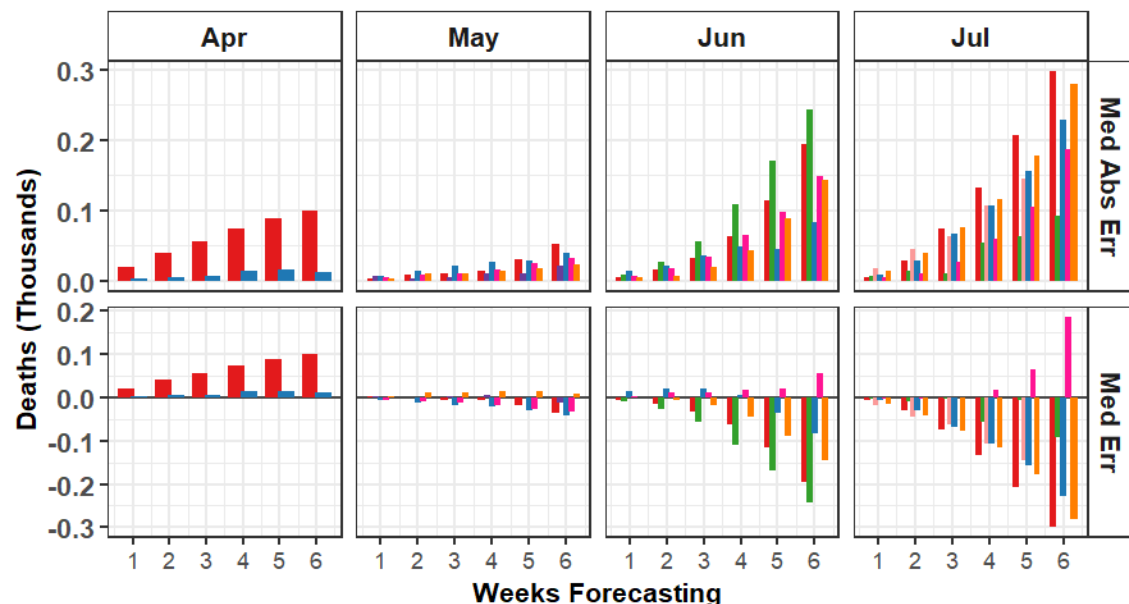

## All Model Versions

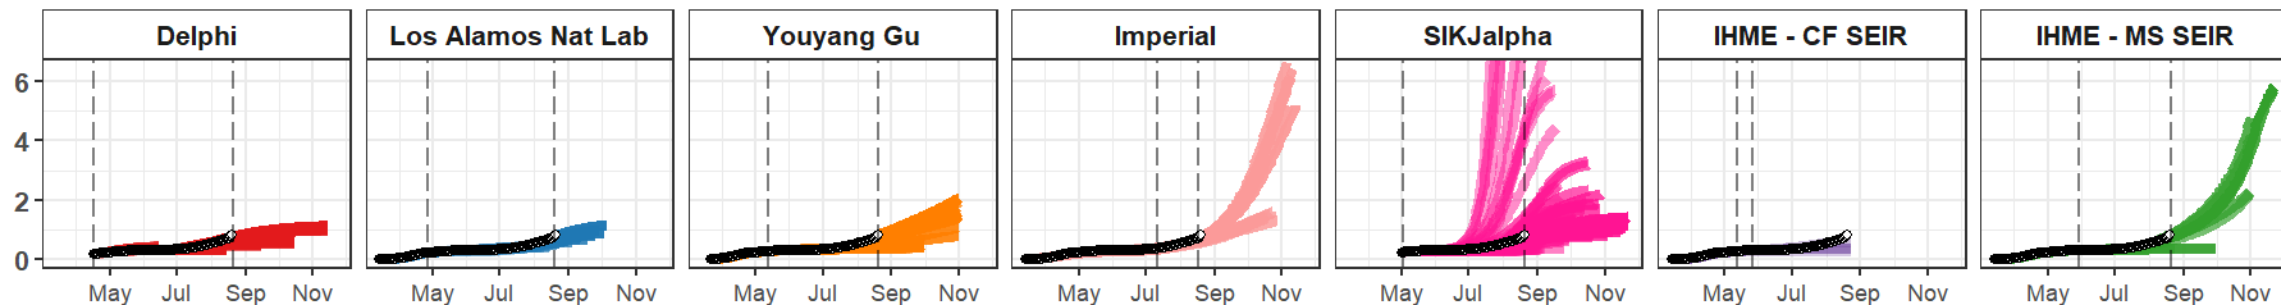

## All Cumulative Errors

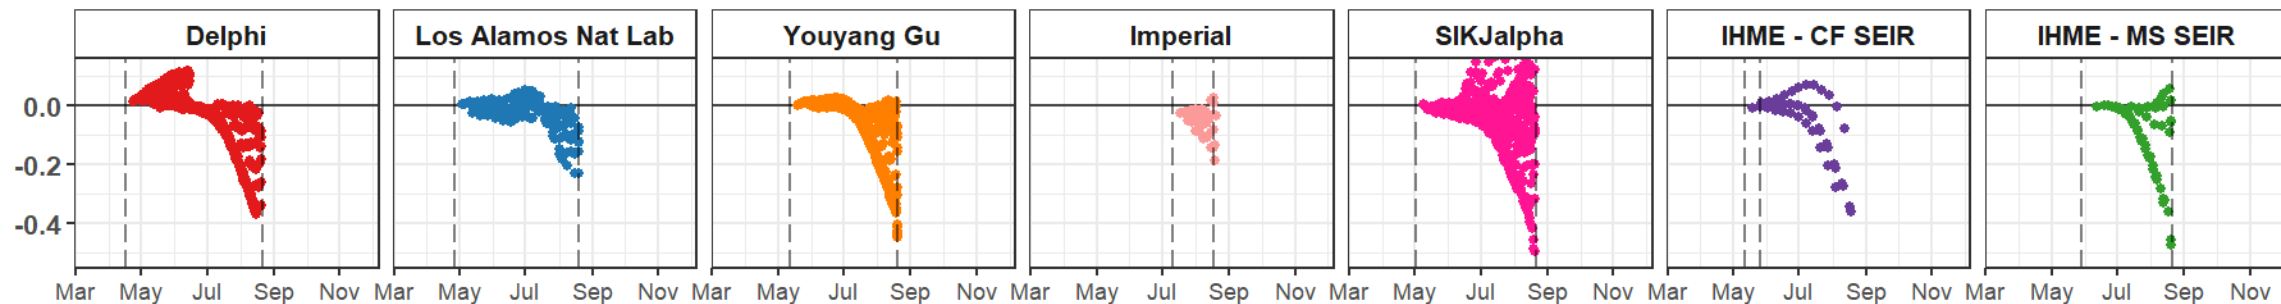



# Morocco

## Current Forecast

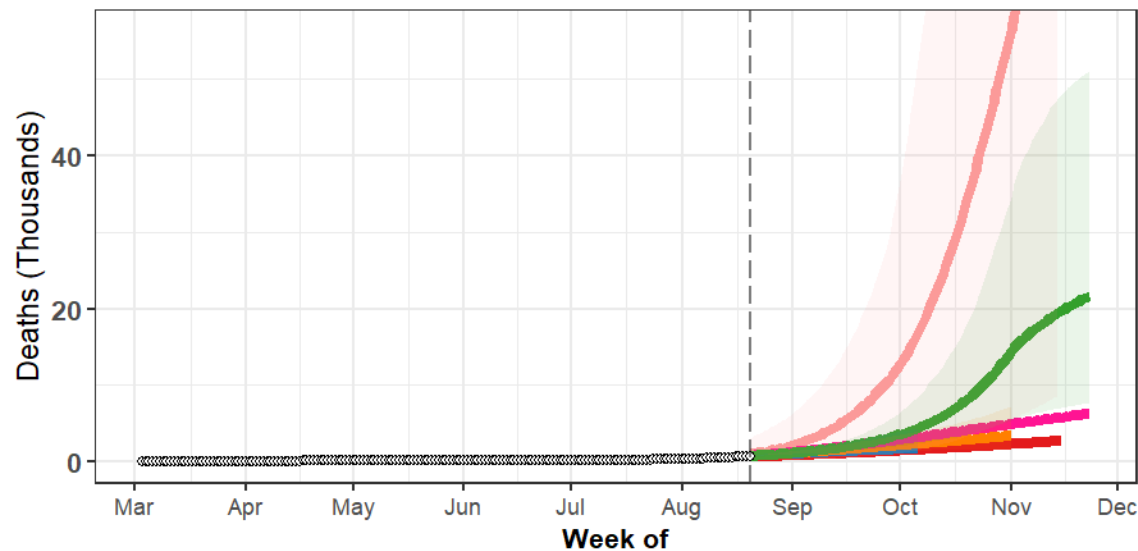

## Cumulative Out-Of-Sample Error (Post Intercept Shift)

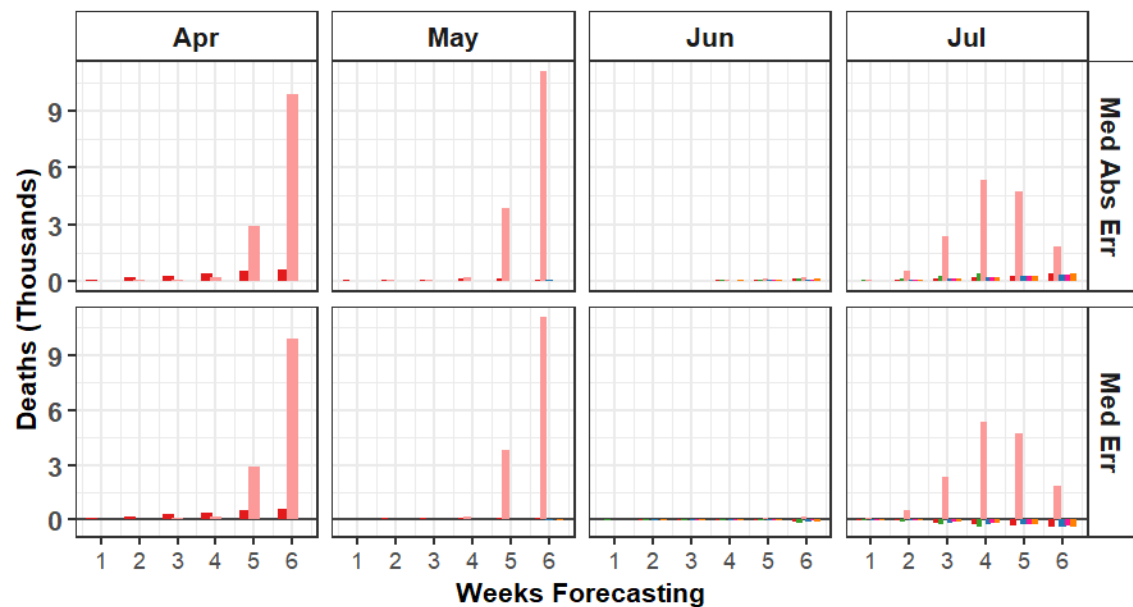

## All Model Versions

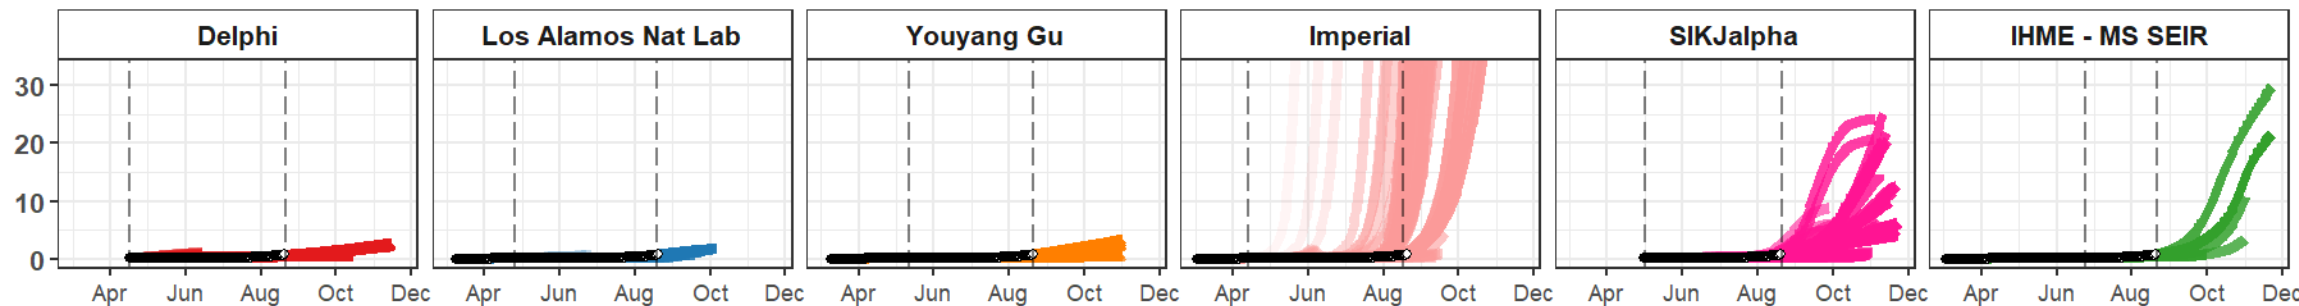

## All Cumulative Errors

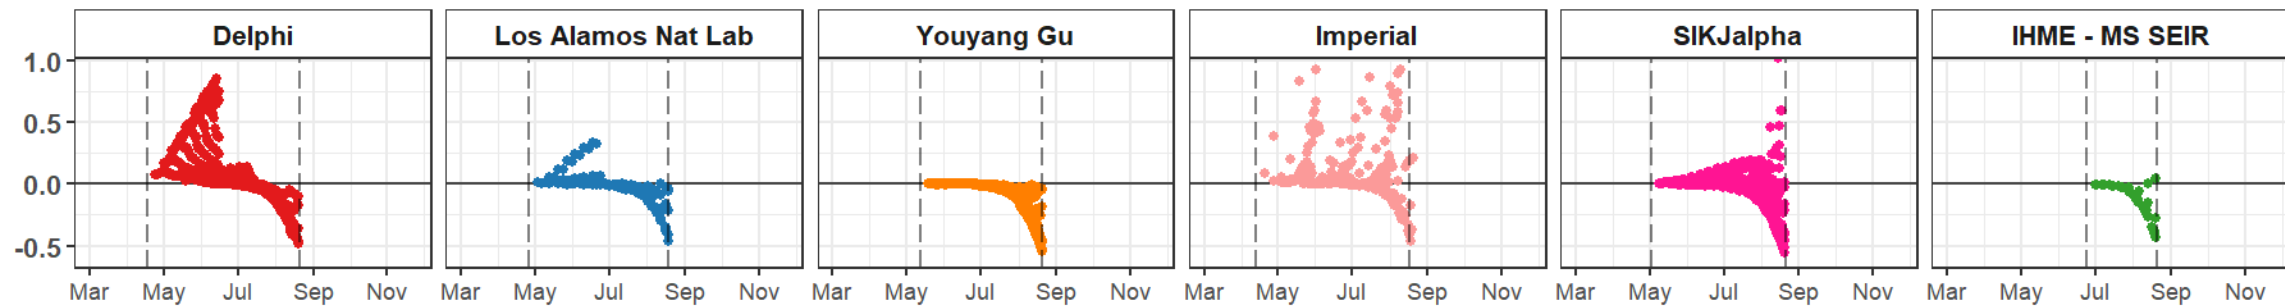

# New Mexico

## Current Forecast

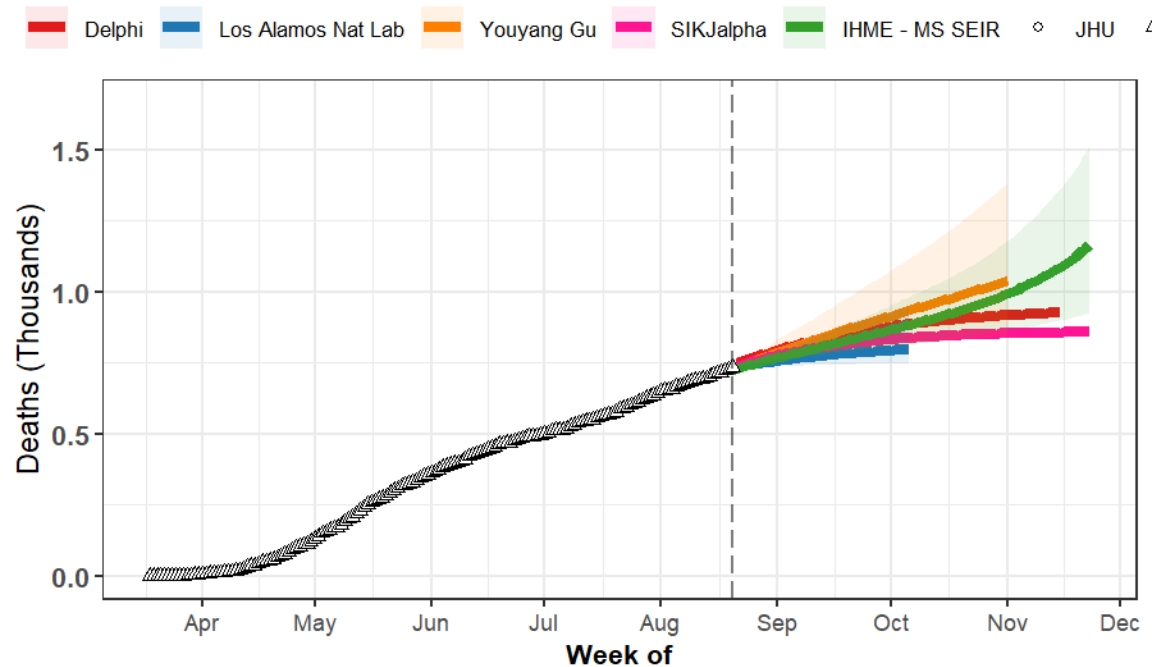

## Cumulative Out-Of-Sample Error (Post Intercept Shift)

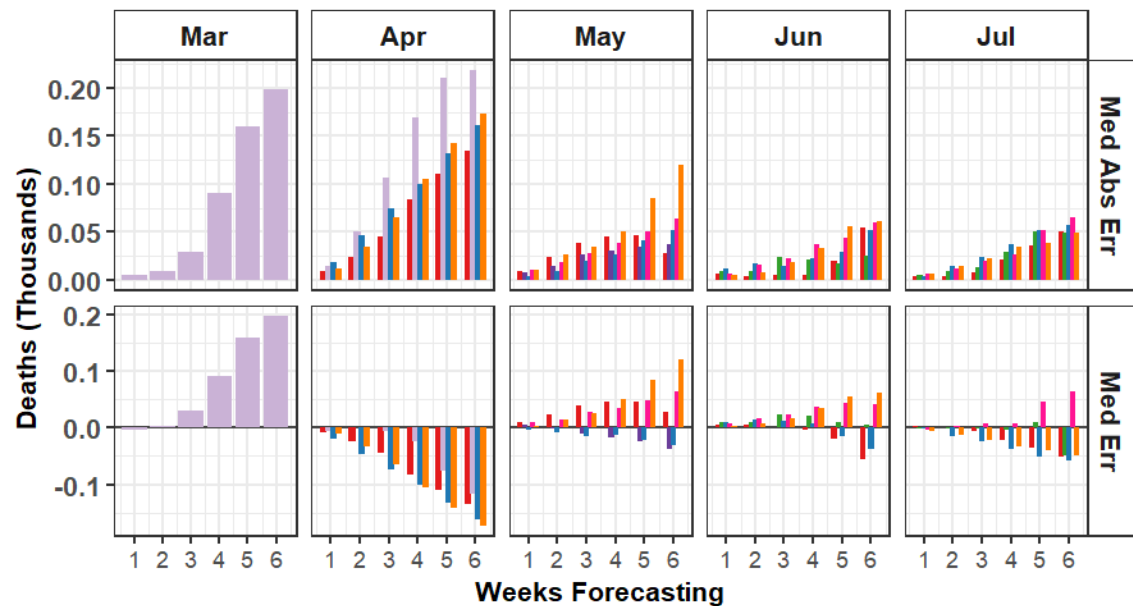

## All Model Versions

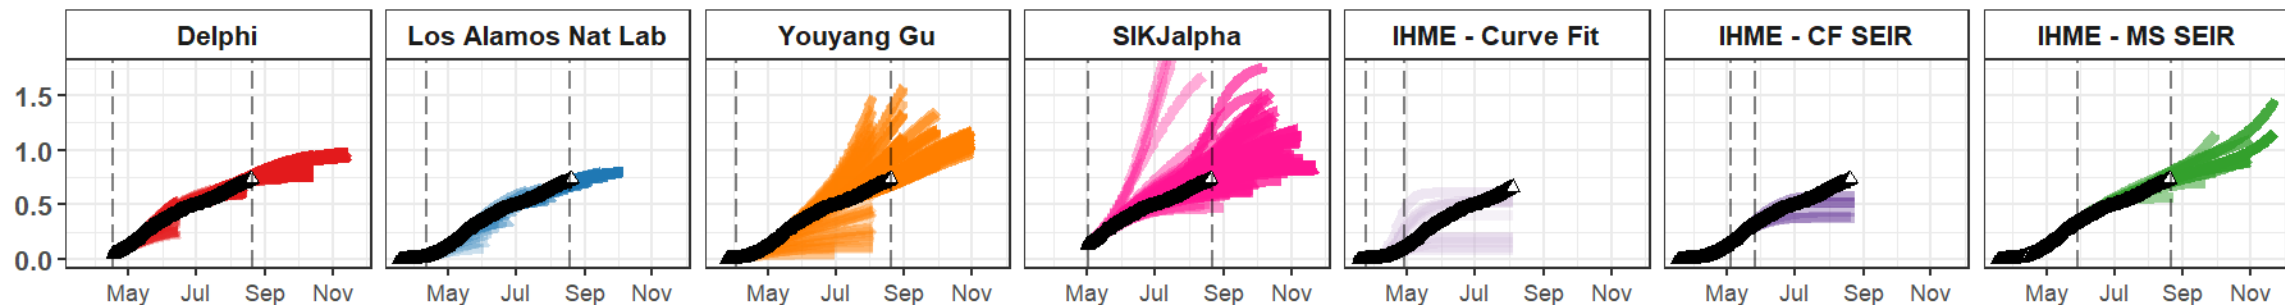

## All Cumulative Errors

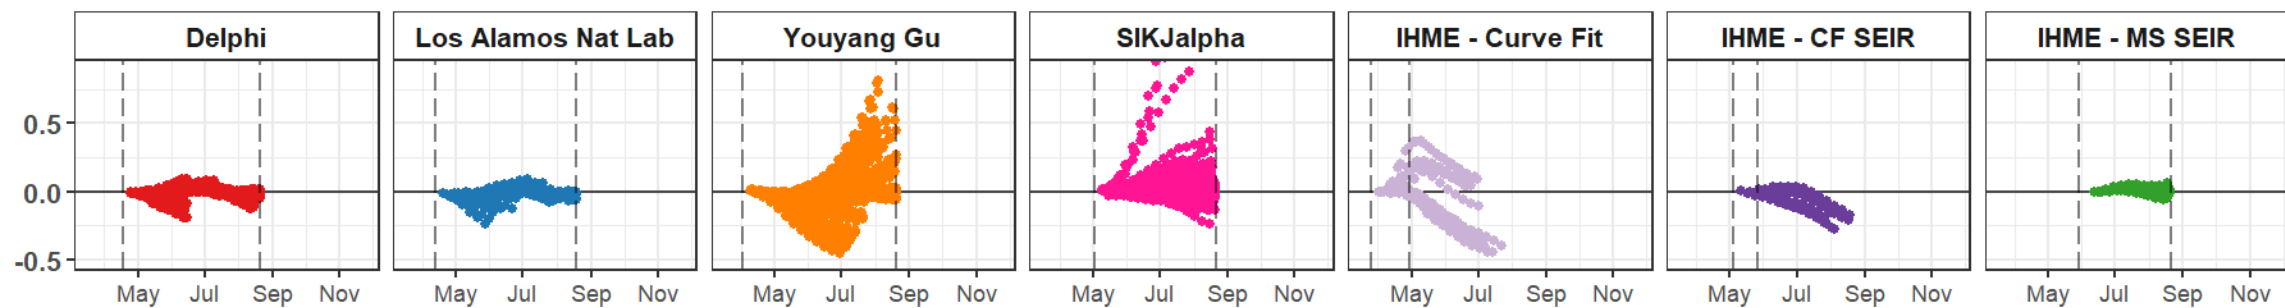

# Austria

## Current Forecast

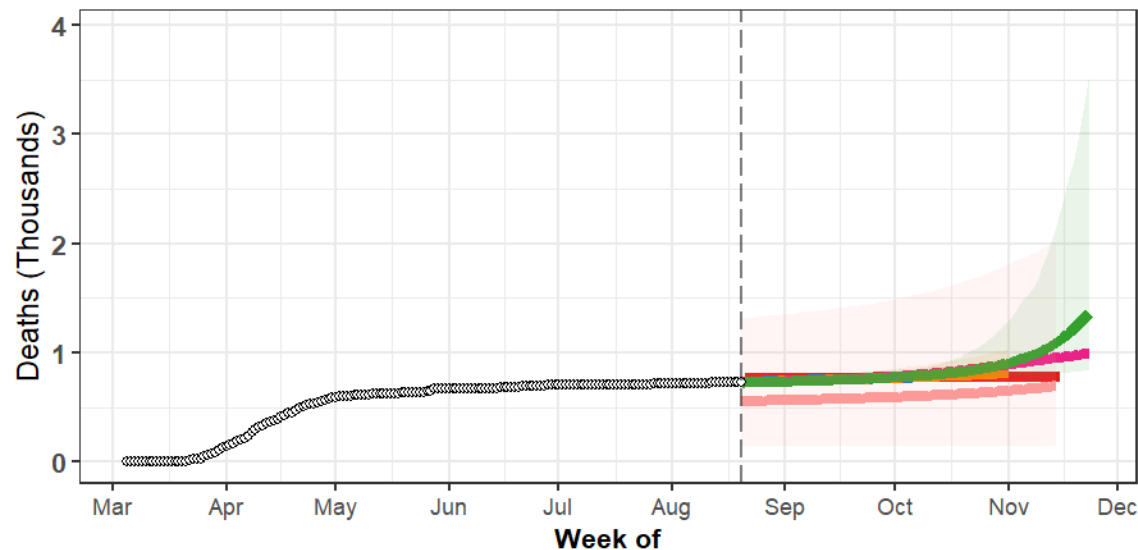

## Cumulative Out-Of-Sample Error (Post Intercept Shift)

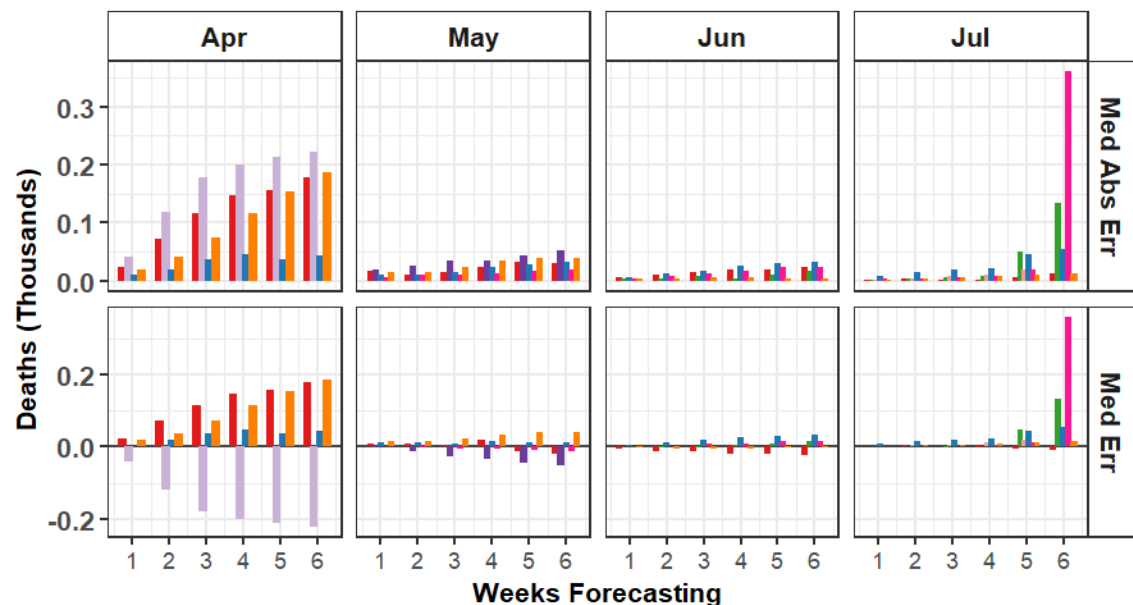

## All Model Versions

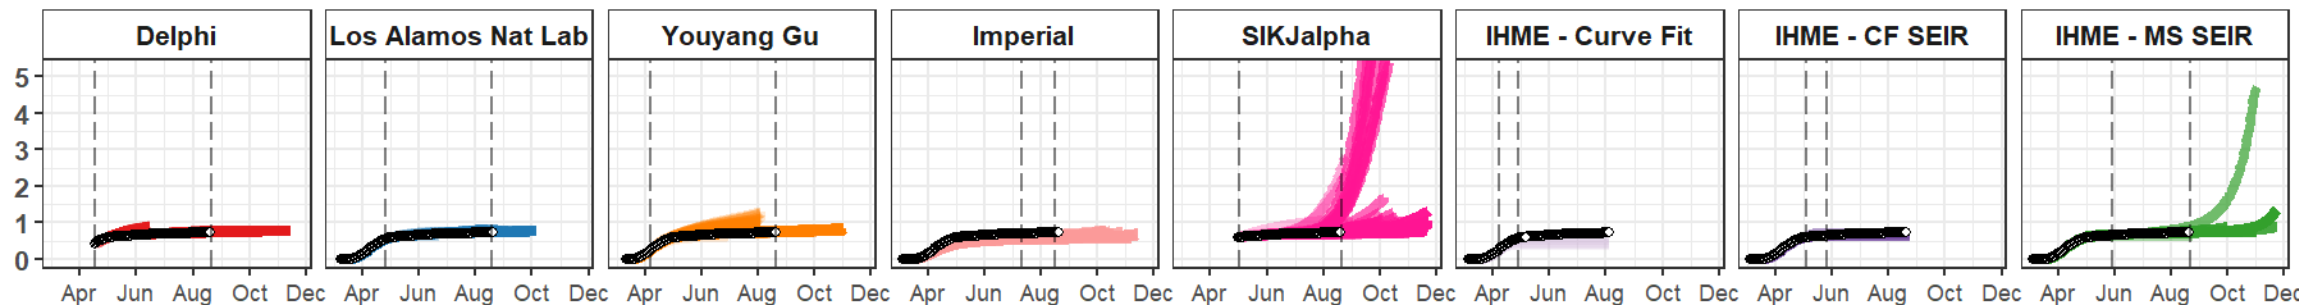

## All Cumulative Errors

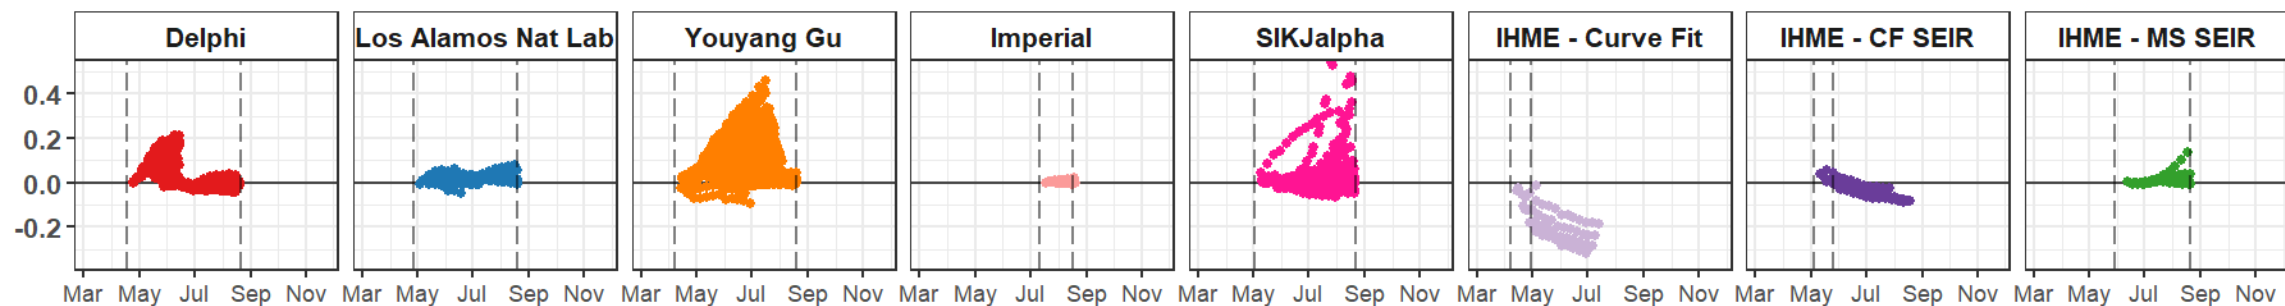

# Oklahoma

## Current Forecast

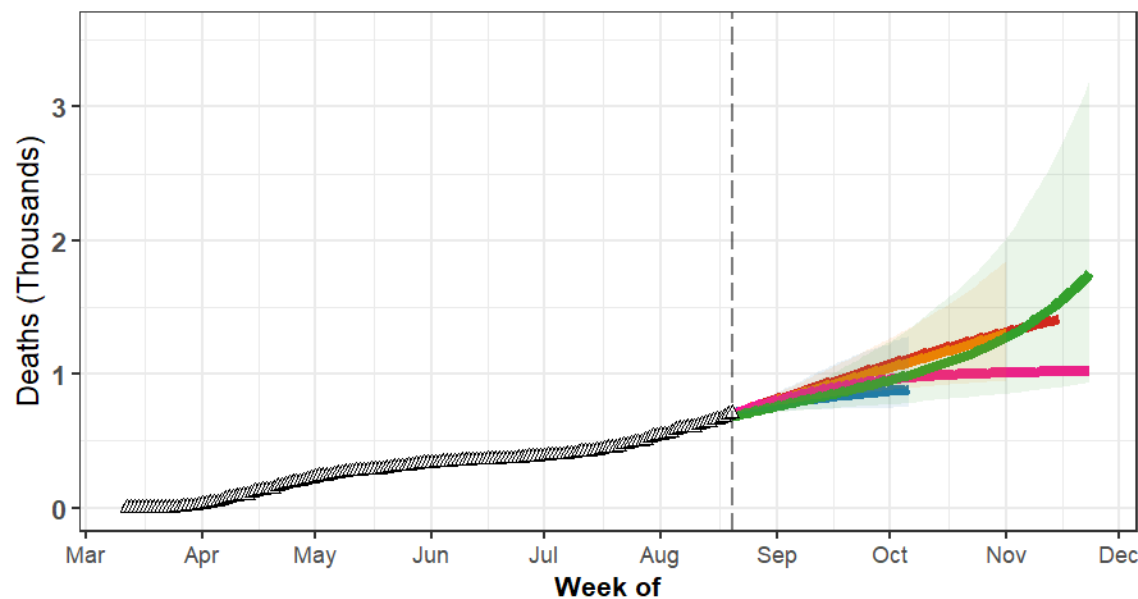

## Cumulative Out-Of-Sample Error (Post Intercept Shift)

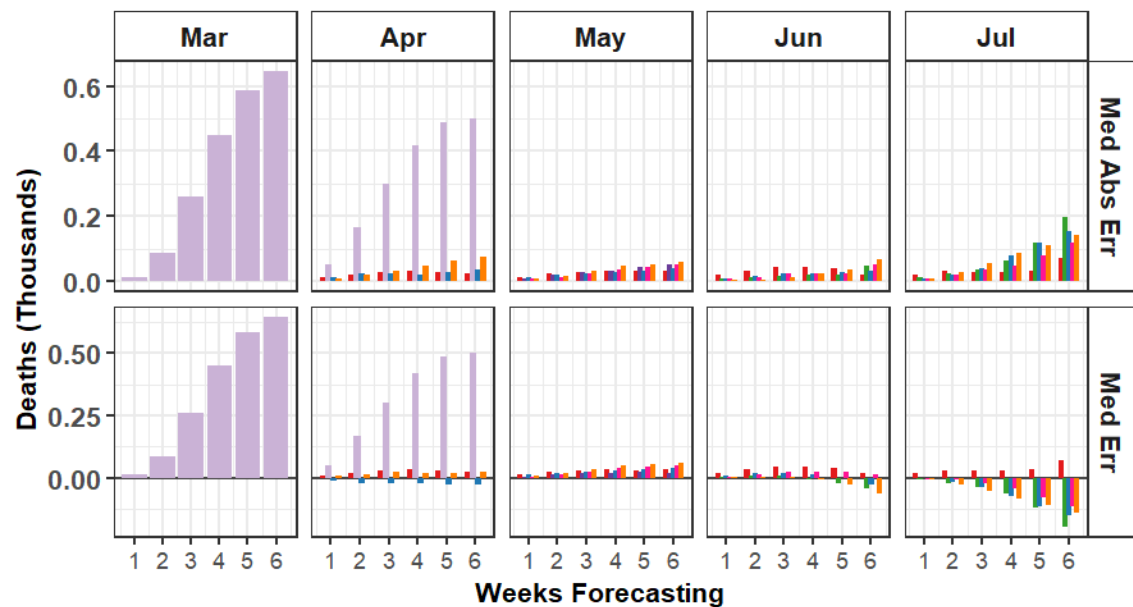

## All Model Versions

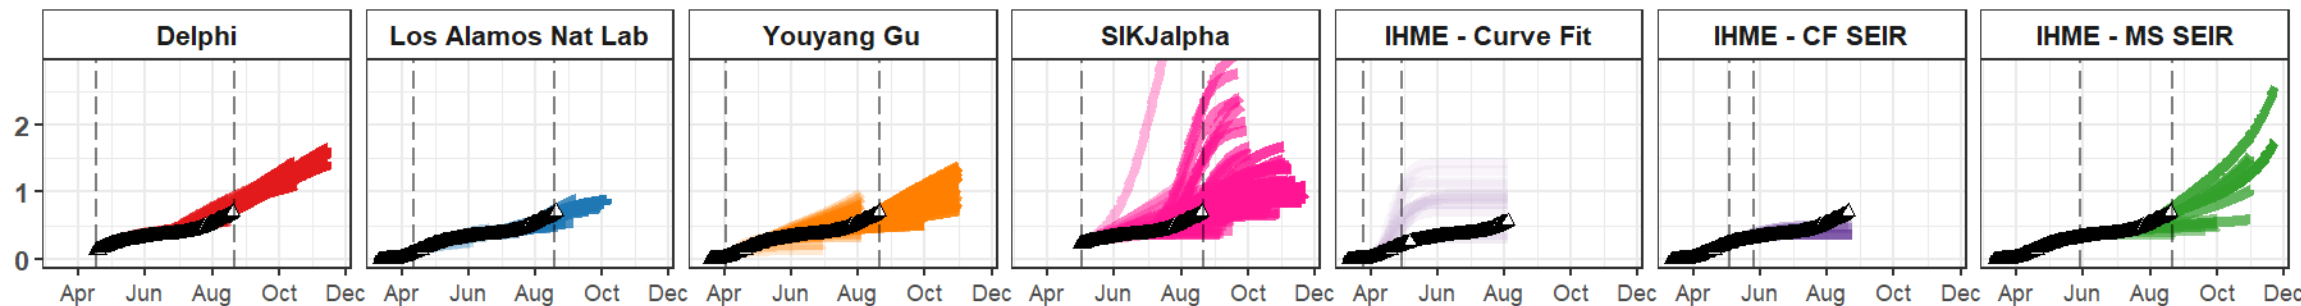

## All Cumulative Errors

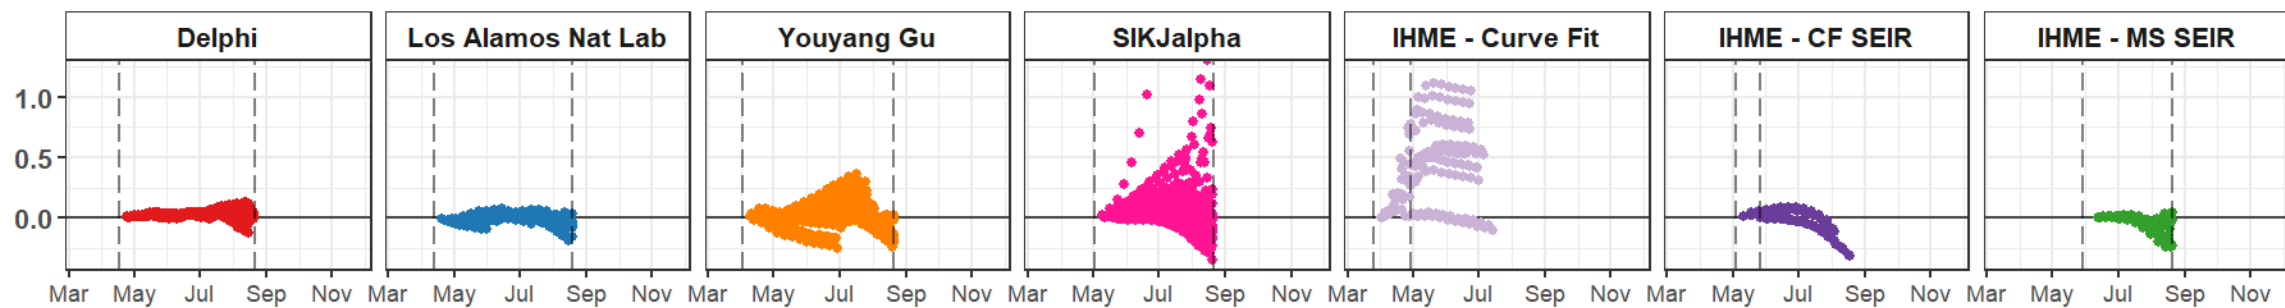

# Serbia

## Current Forecast

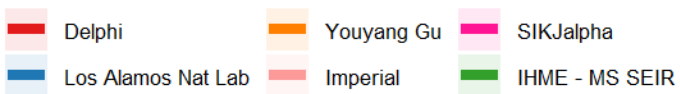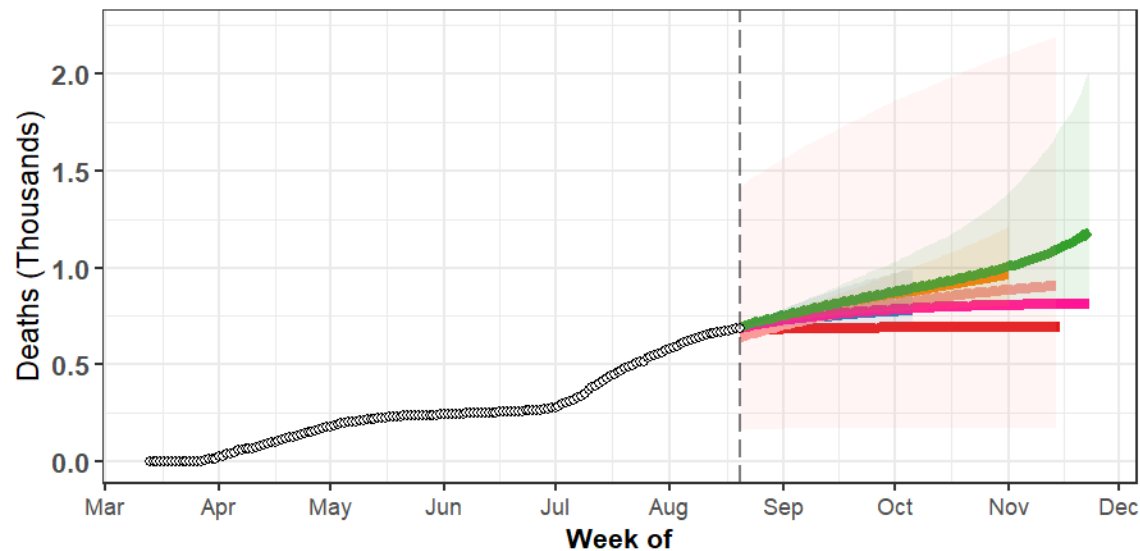

## Cumulative Out-Of-Sample Error (Post Intercept Shift)

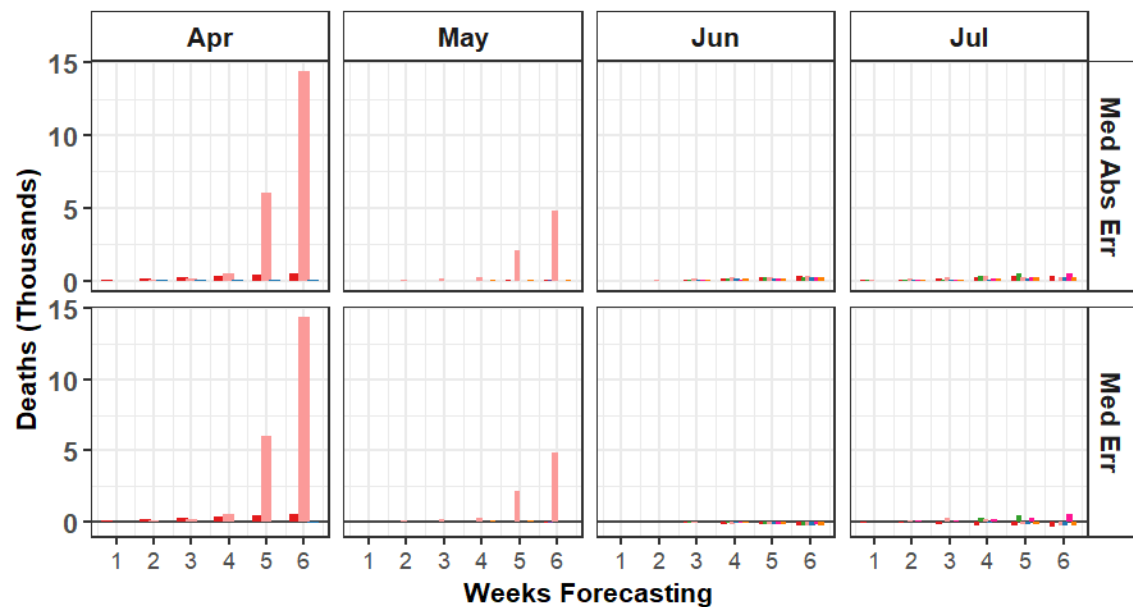

## All Model Versions

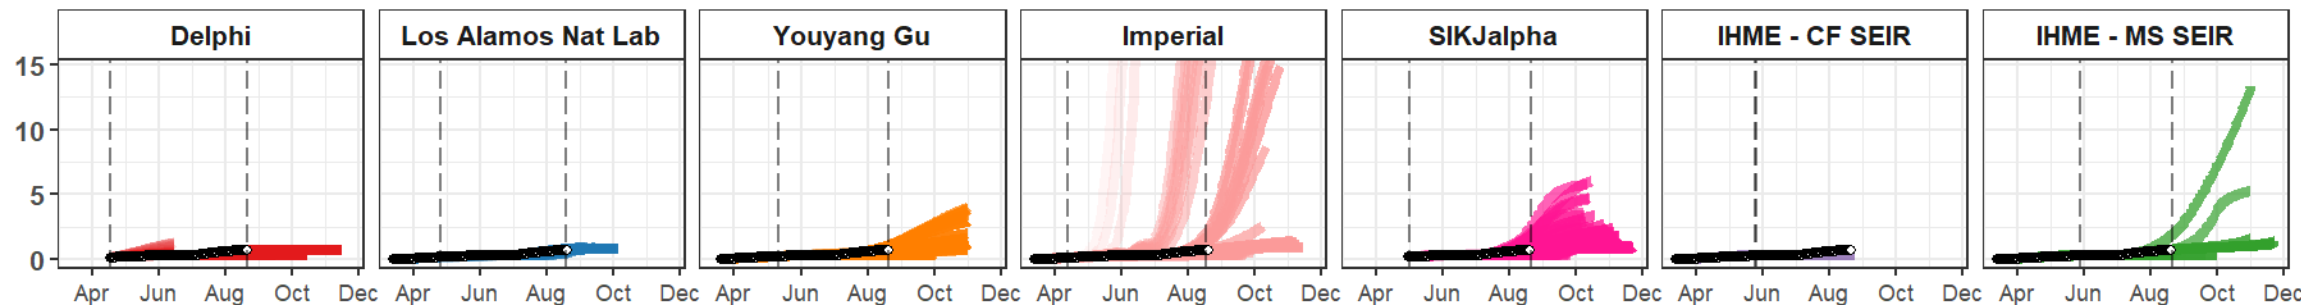

## All Cumulative Errors

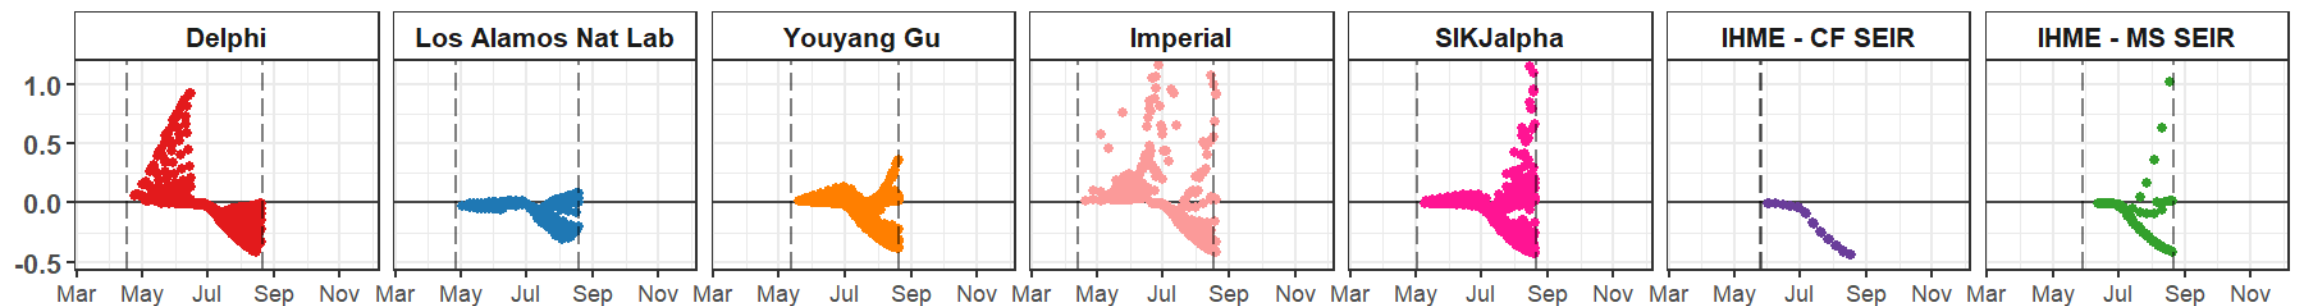

# Arkansas

## Current Forecast

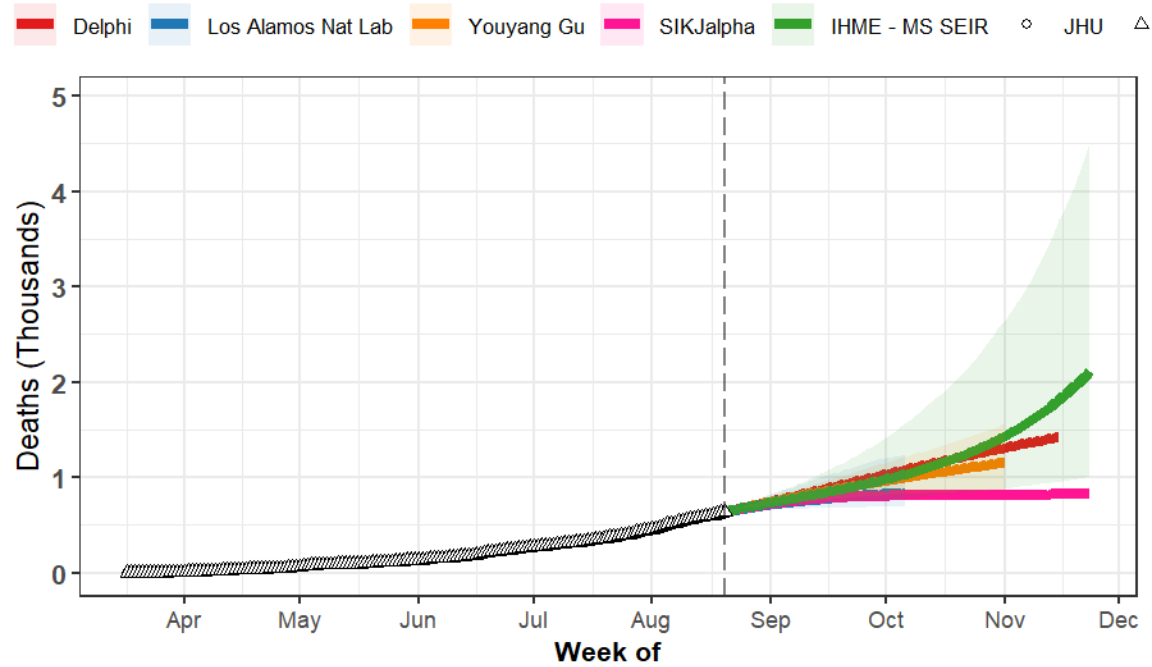

## Cumulative Out-Of-Sample Error (Post Intercept Shift)

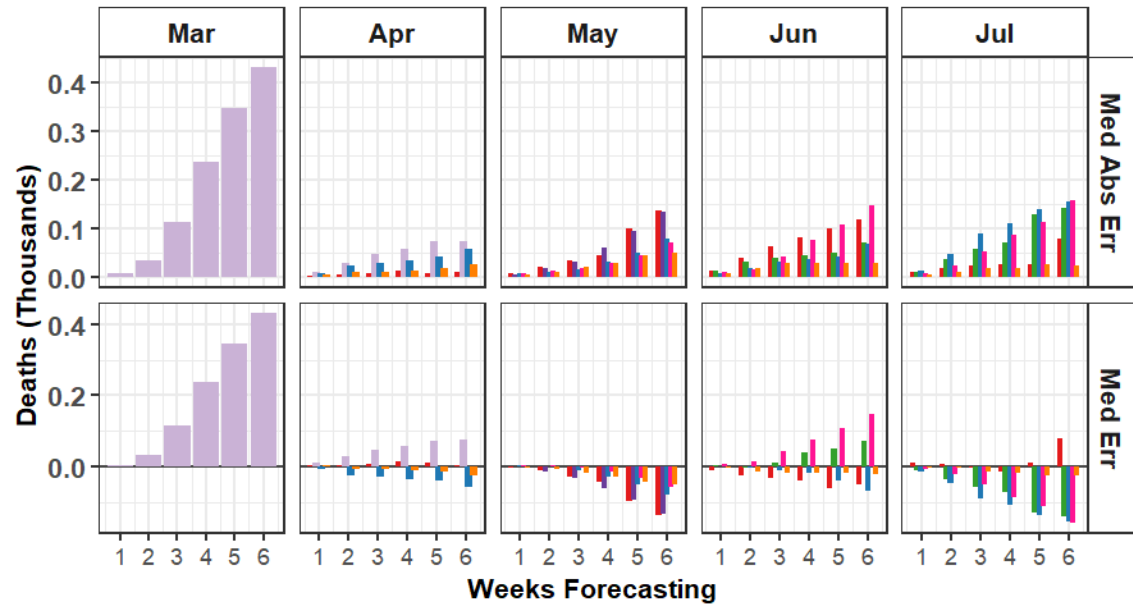

## All Model Versions

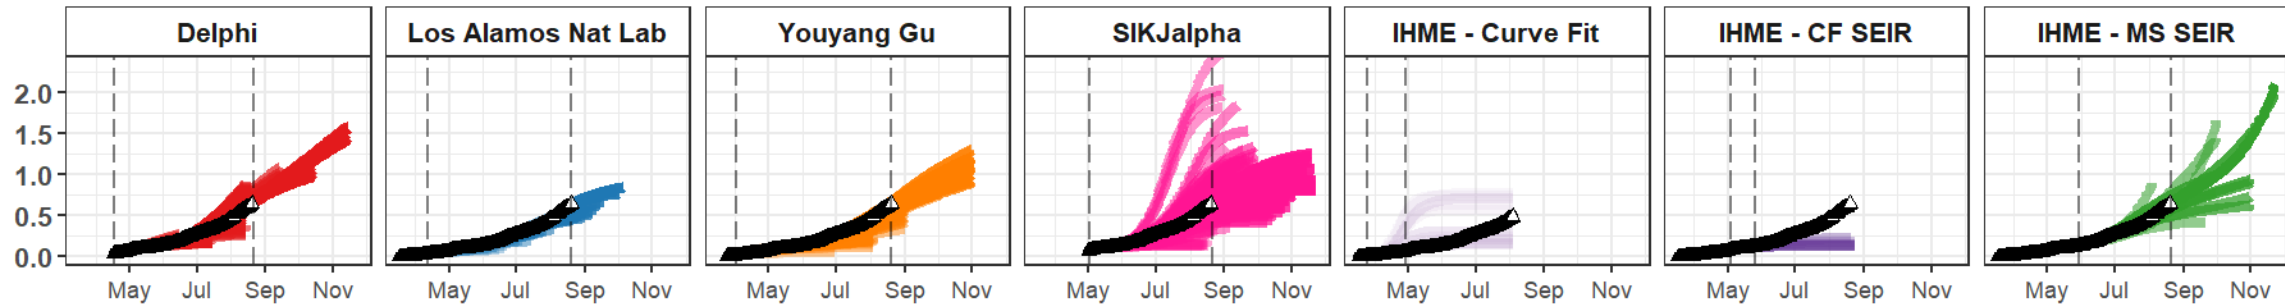

## All Cumulative Errors

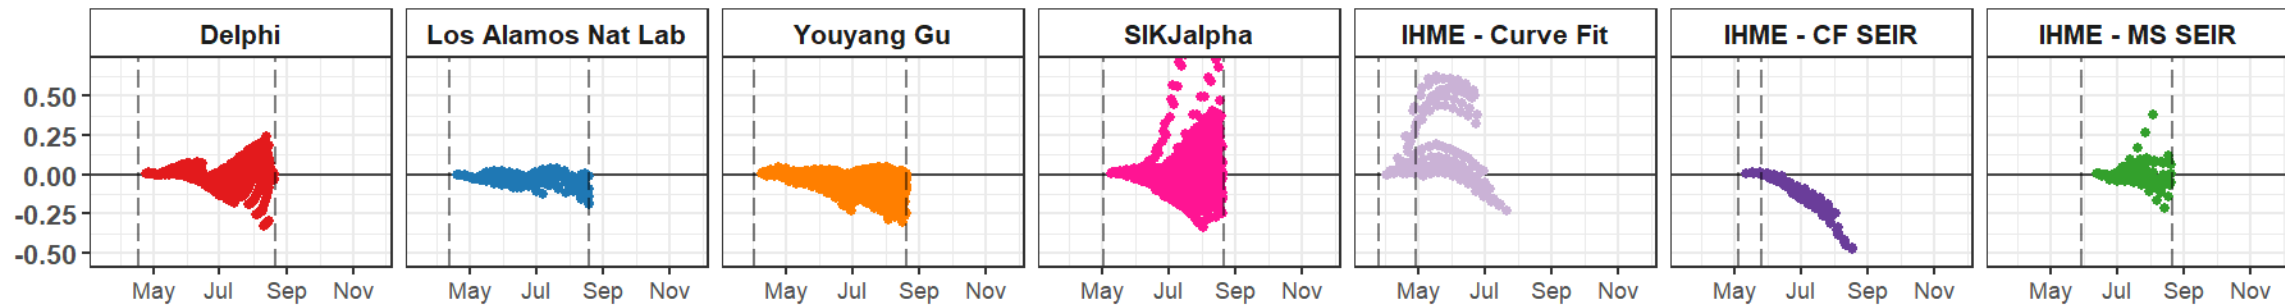

# El Salvador

## Current Forecast

Delphi Los Alamos Nat Lab Imperial SIKJalpha IHME - MS SEIR

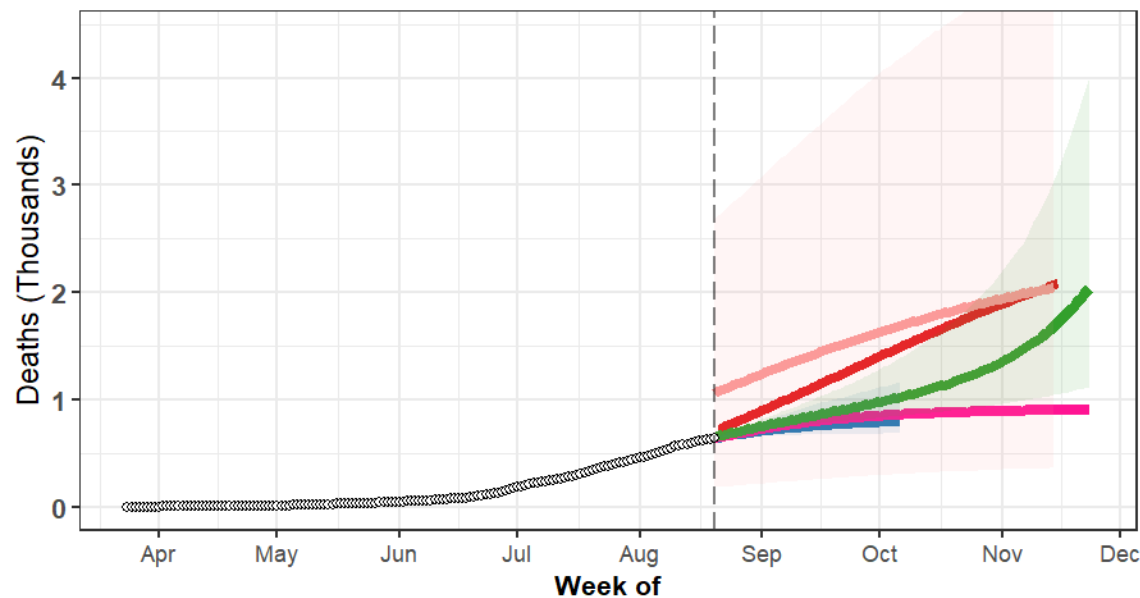

## Cumulative Out-Of-Sample Error (Post Intercept Shift)

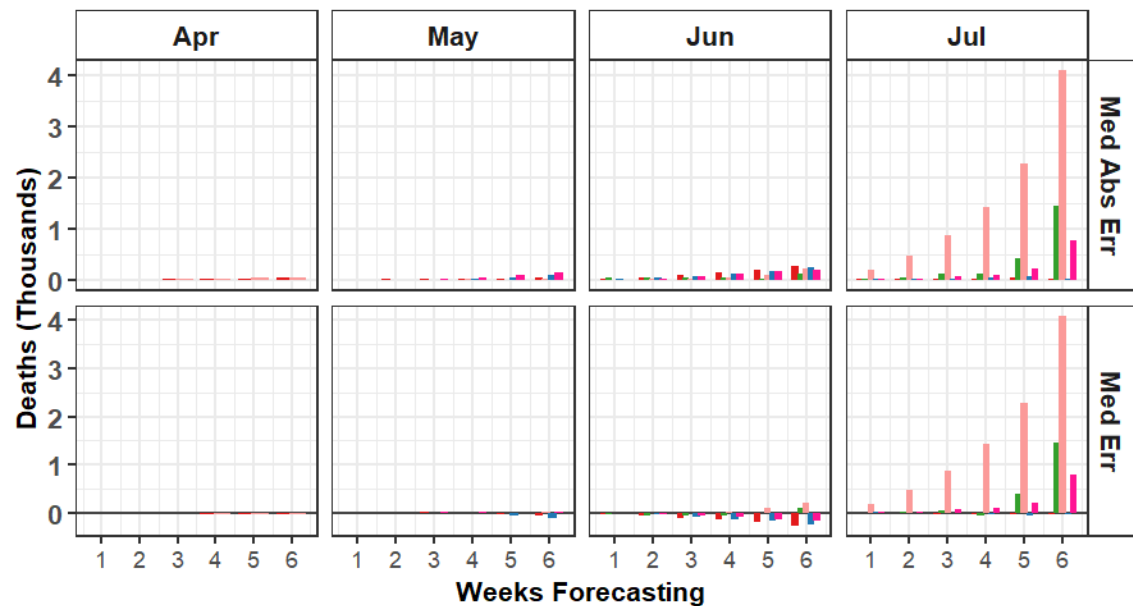

## All Model Versions

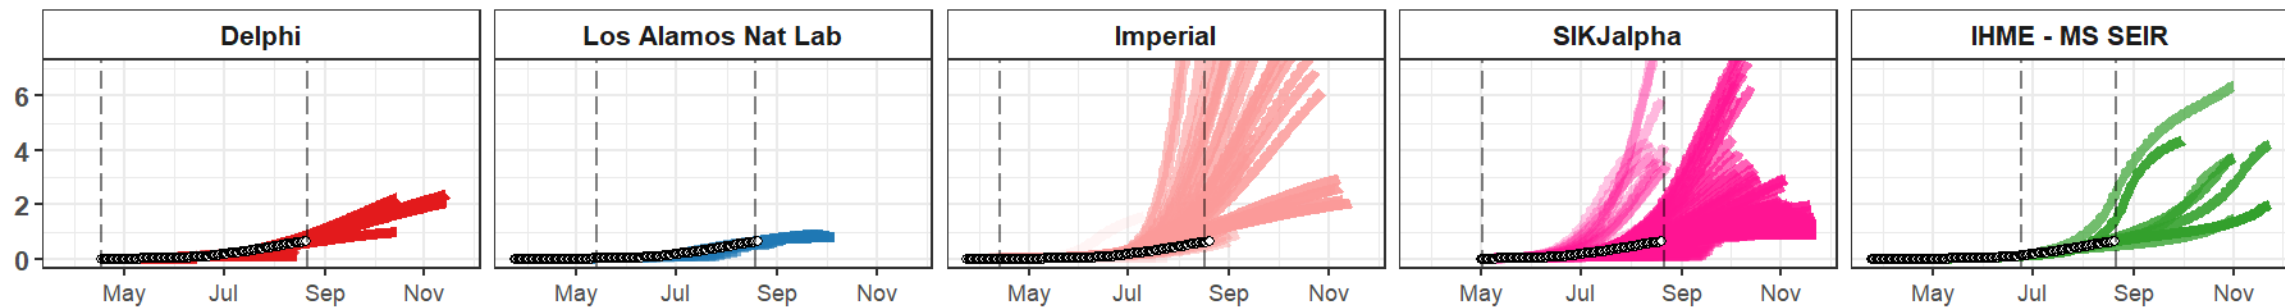

## All Cumulative Errors

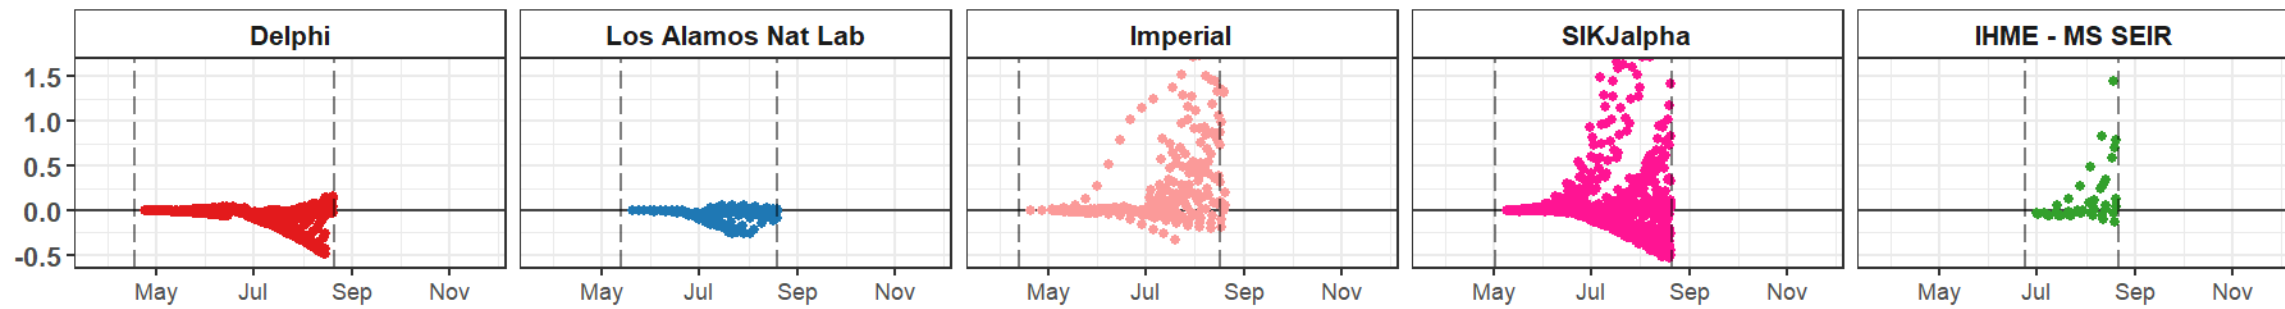

# Belarus

## Current Forecast

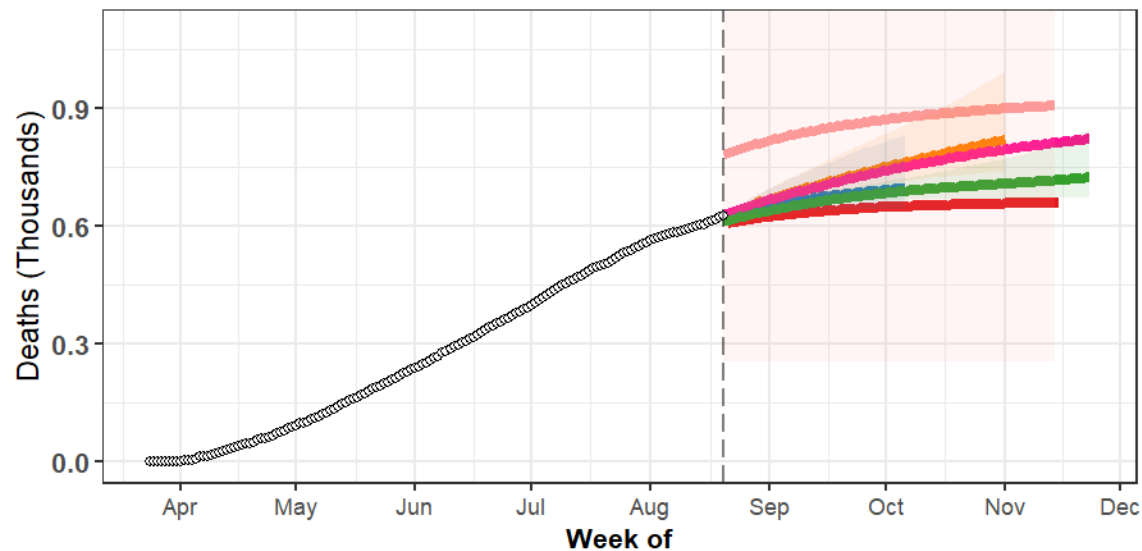

## Cumulative Out-Of-Sample Error (Post Intercept Shift)

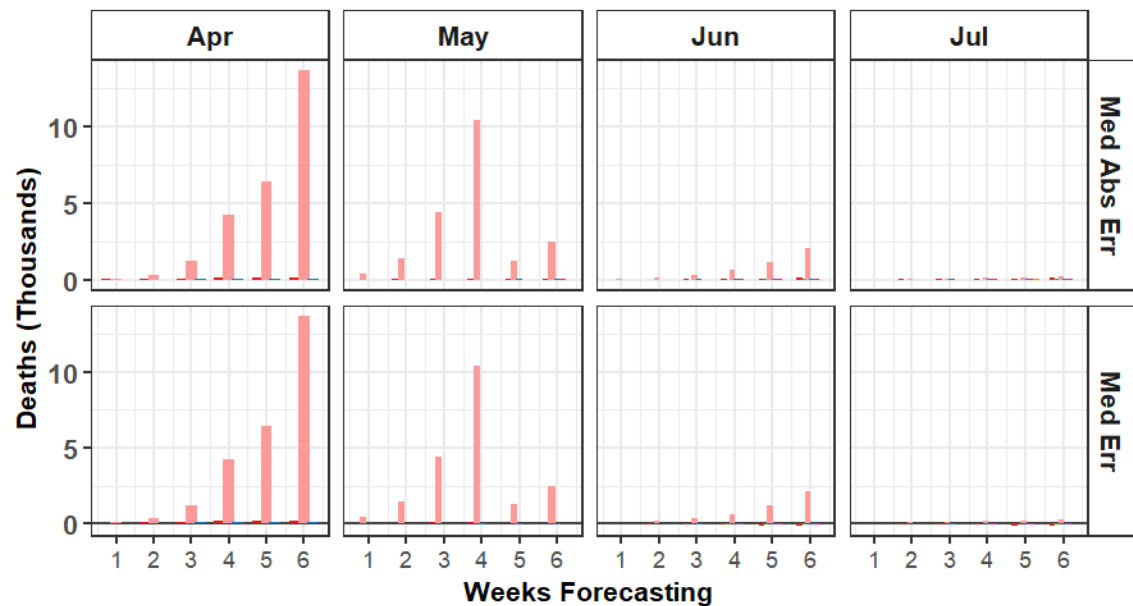

## All Model Versions

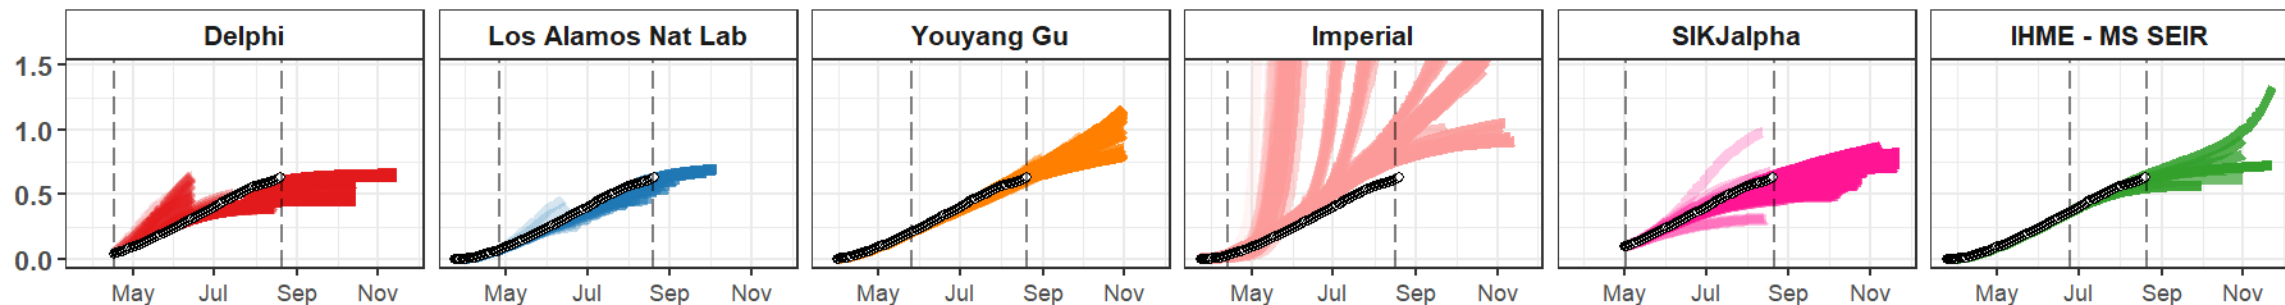

## All Cumulative Errors

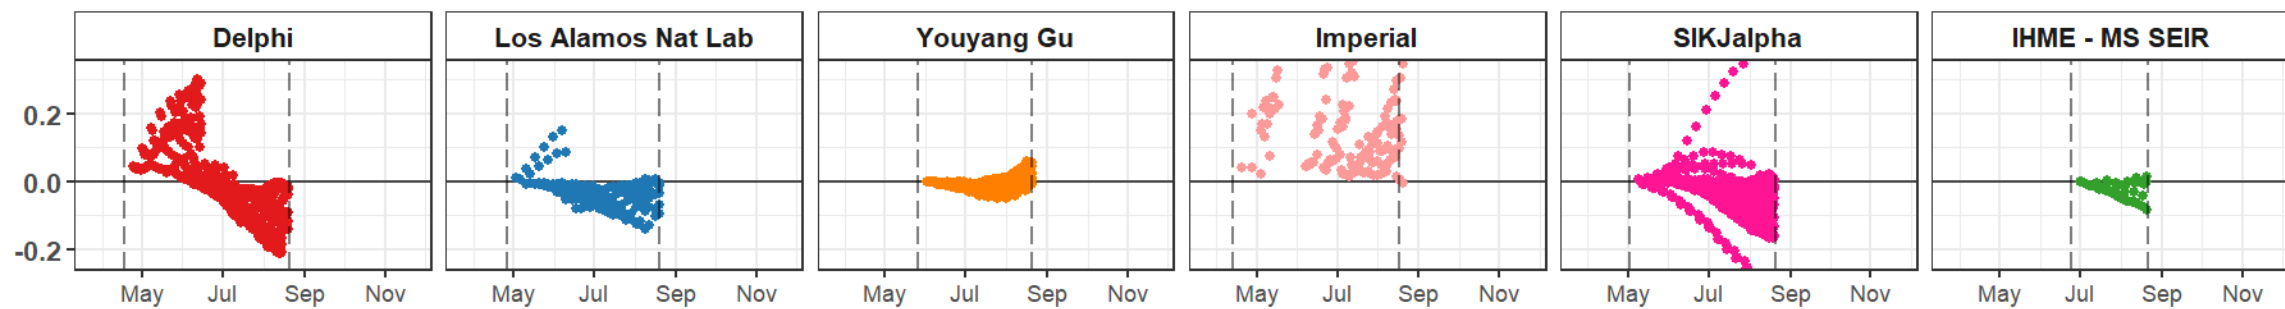



# Denmark

## Current Forecast

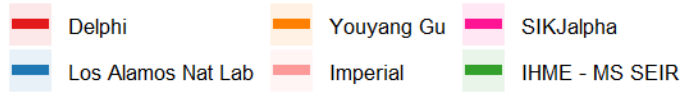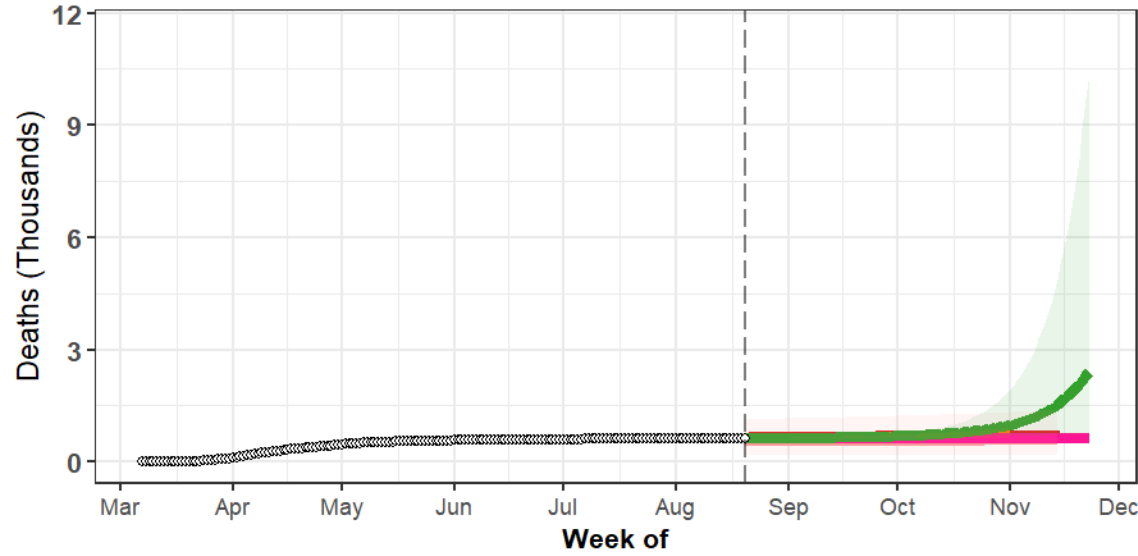

## Cumulative Out-Of-Sample Error (Post Intercept Shift)

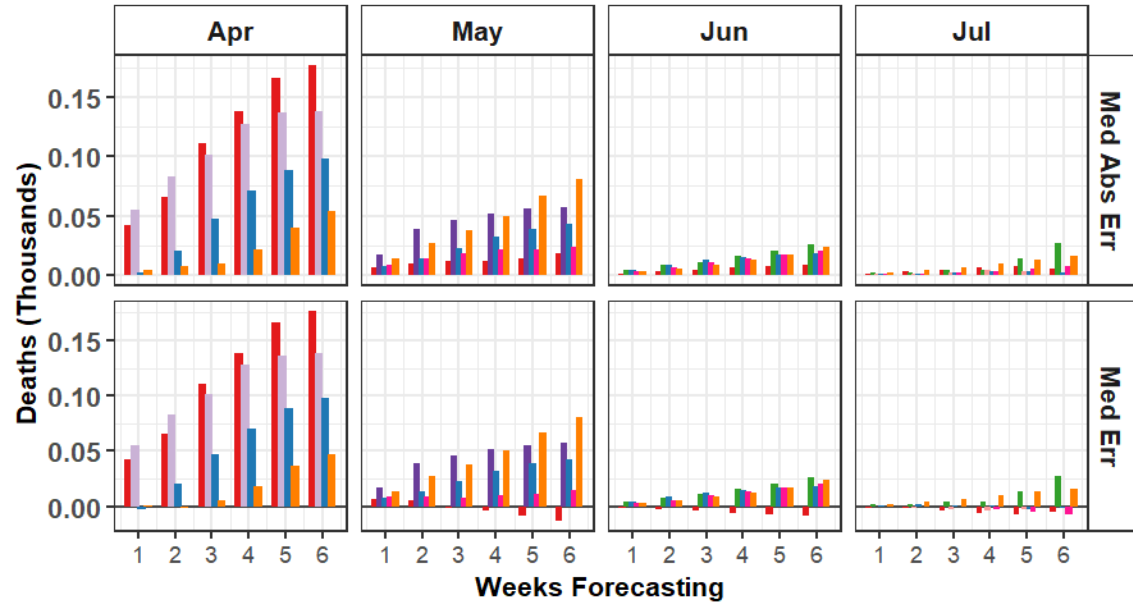

## All Model Versions

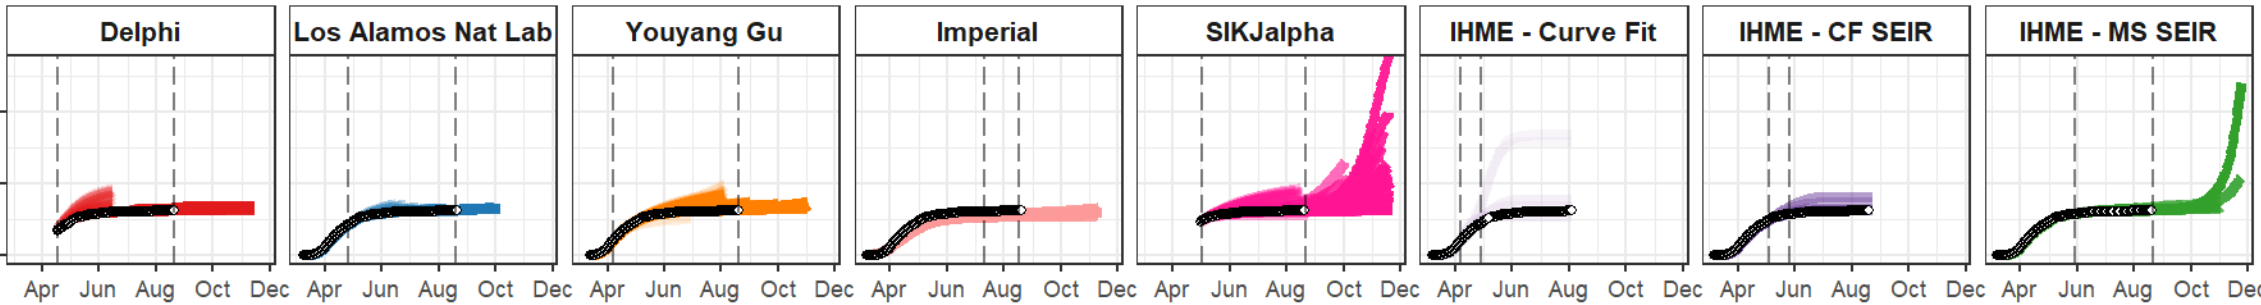

## All Cumulative Errors

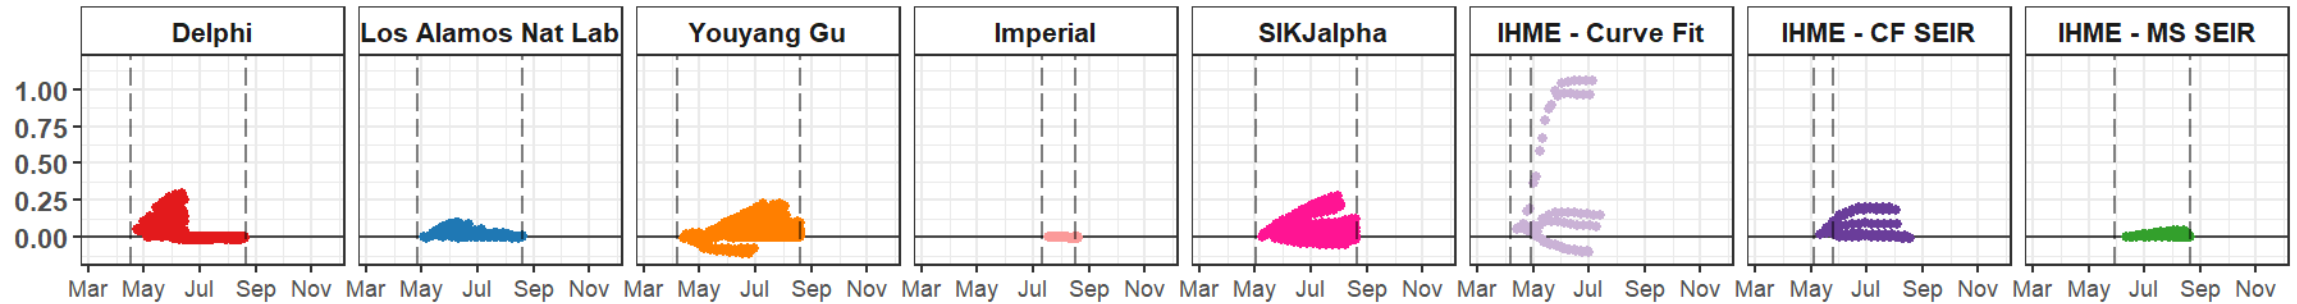

# Ethiopia

## Current Forecast

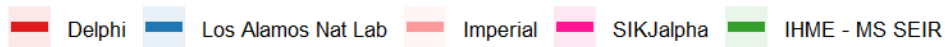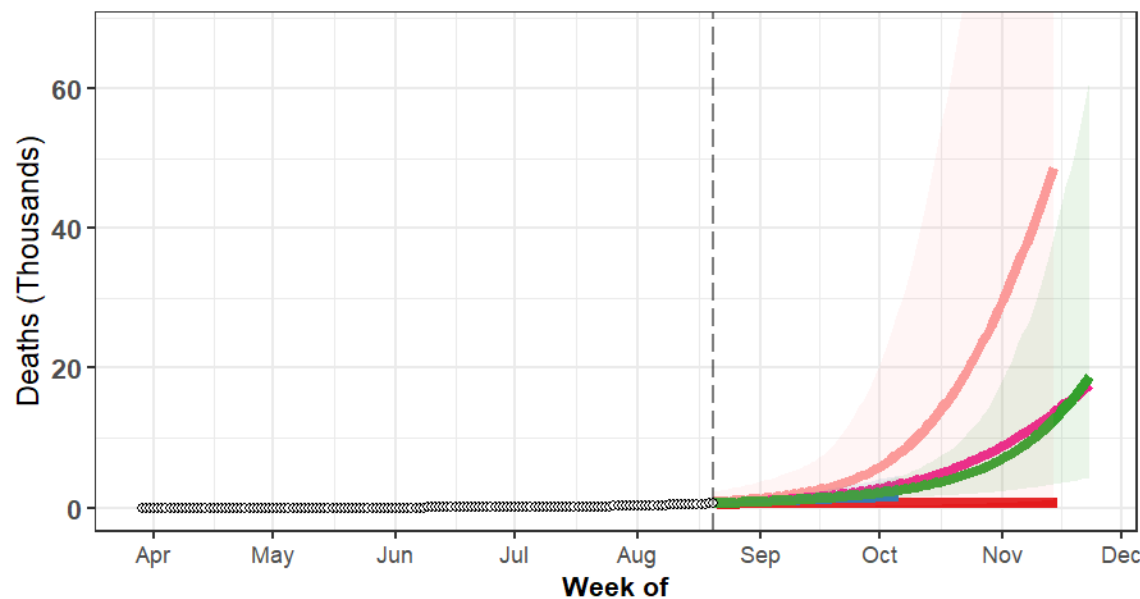

## Cumulative Out-Of-Sample Error (Post Intercept Shift)

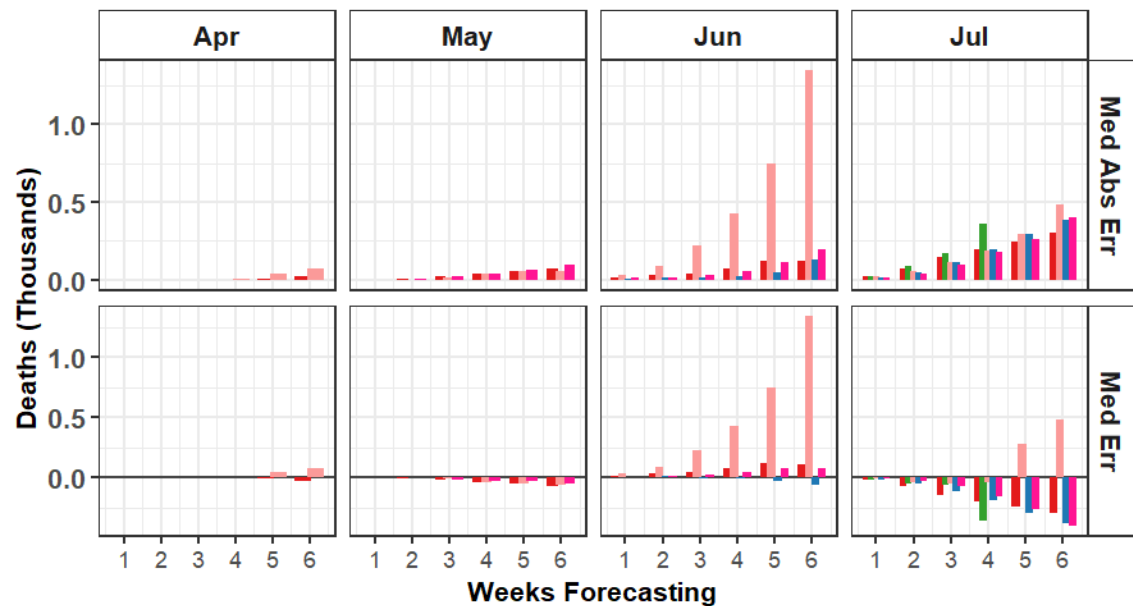

## All Model Versions

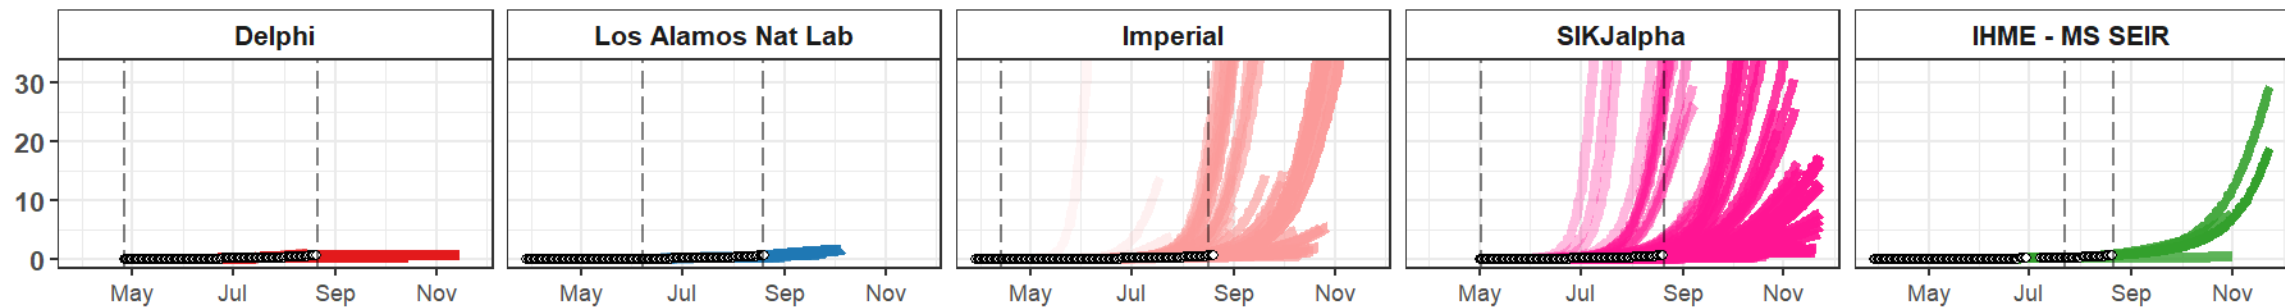

## All Cumulative Errors

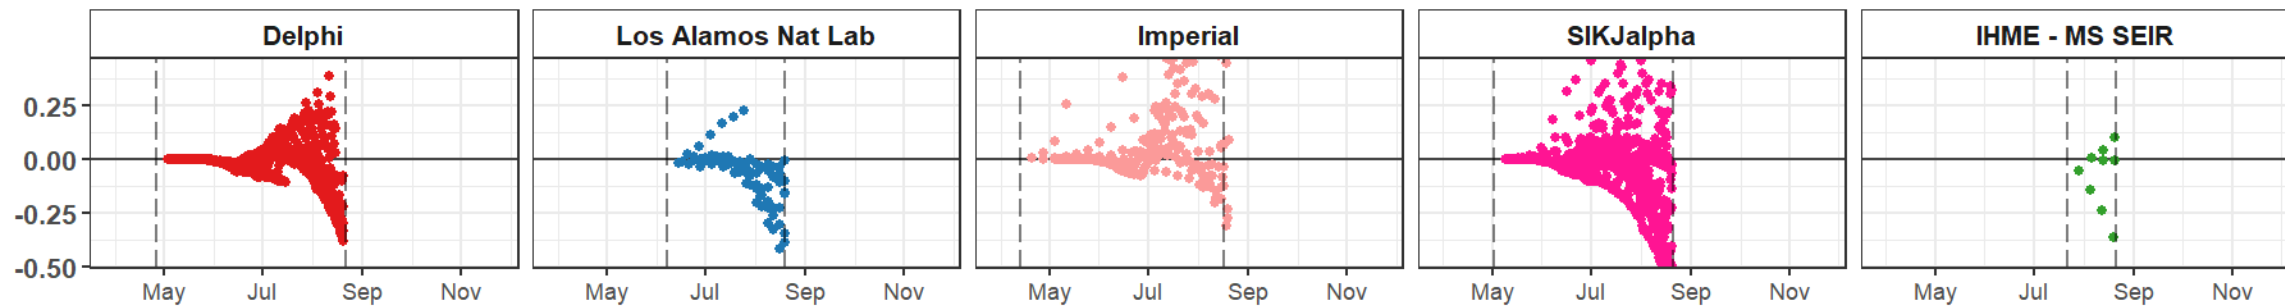

# Hungary

## Current Forecast

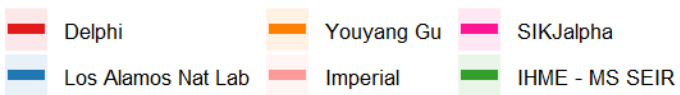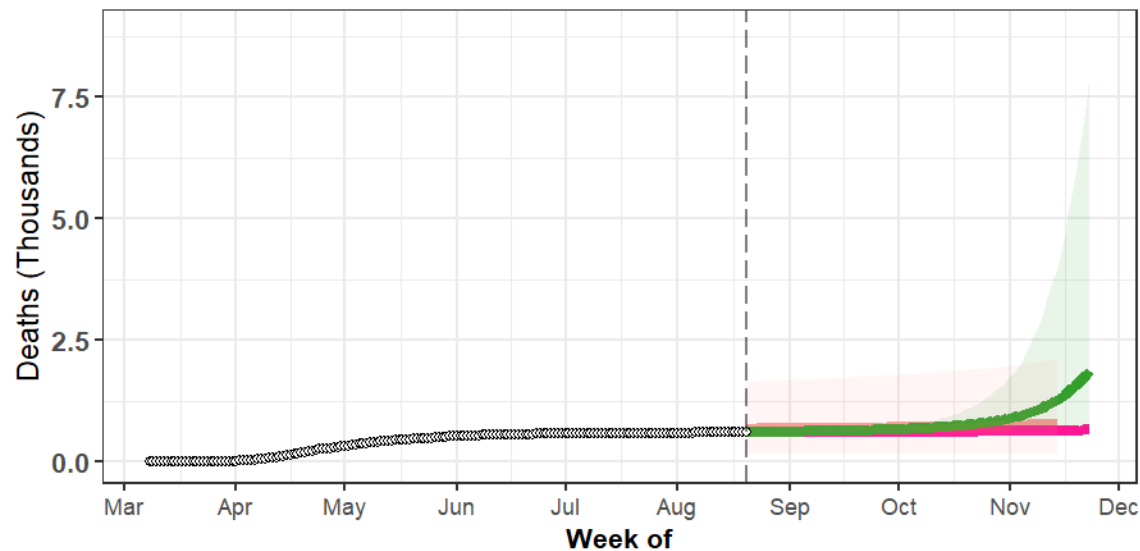

## Cumulative Out-Of-Sample Error (Post Intercept Shift)

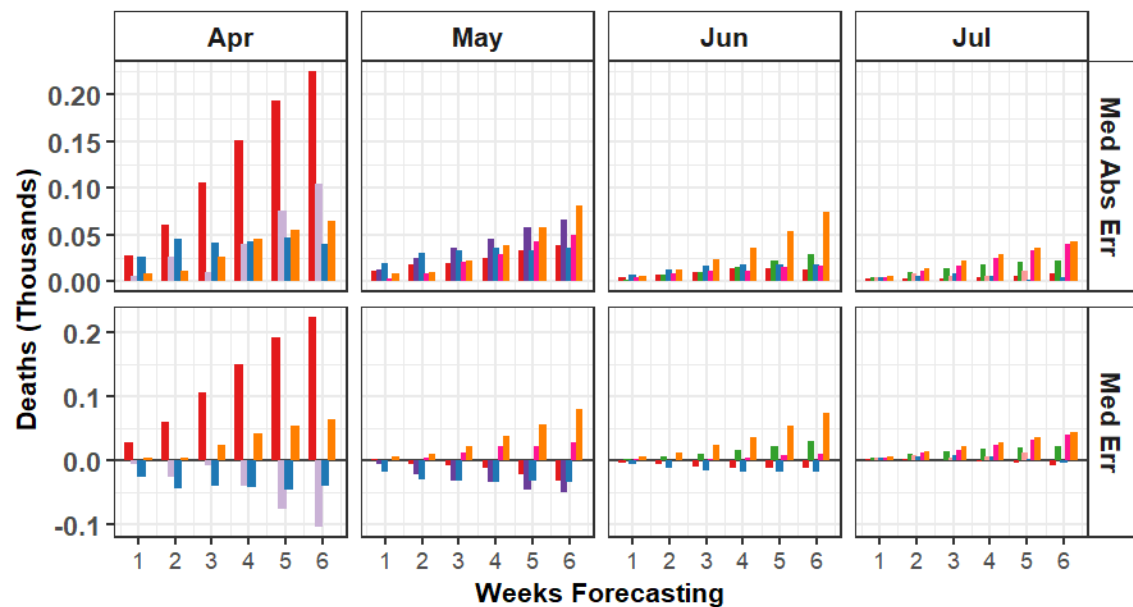

## All Model Versions

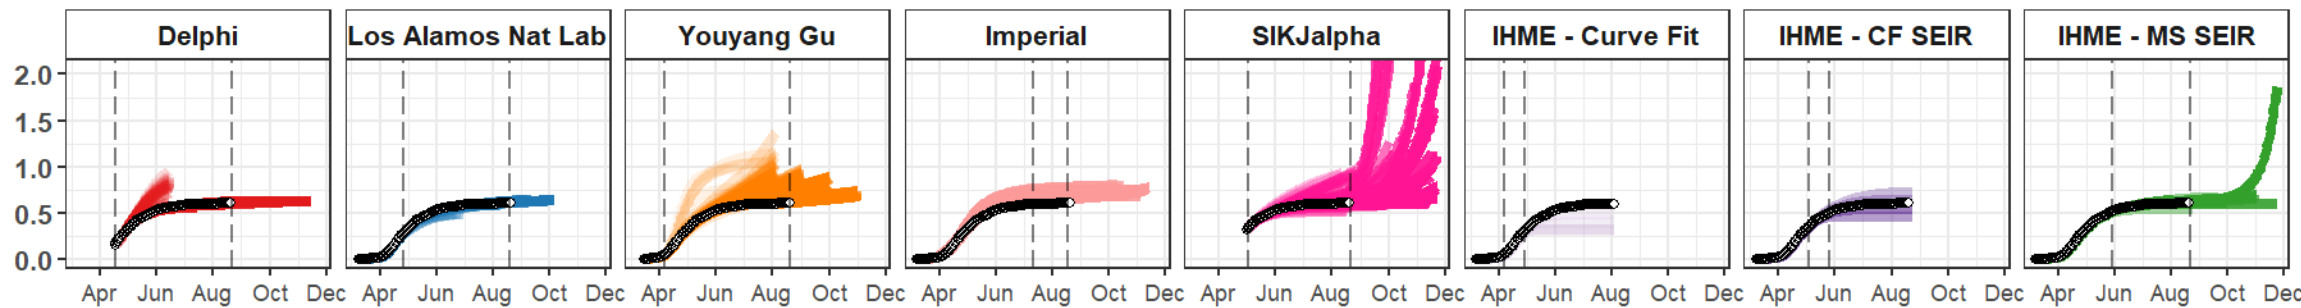

## All Cumulative Errors

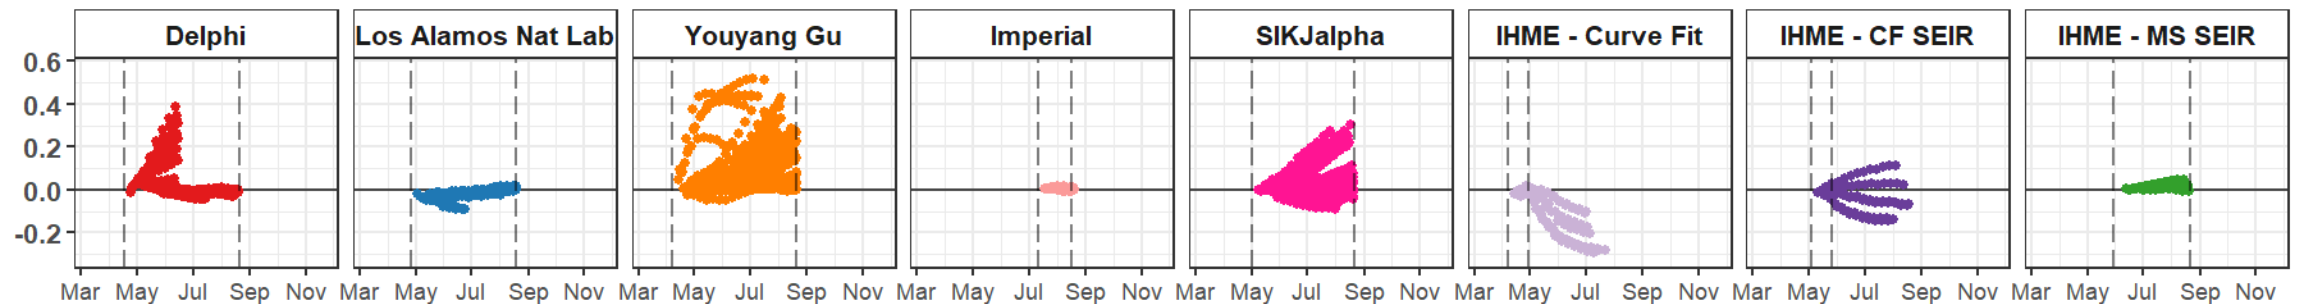

# Oman

## Current Forecast

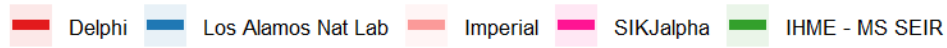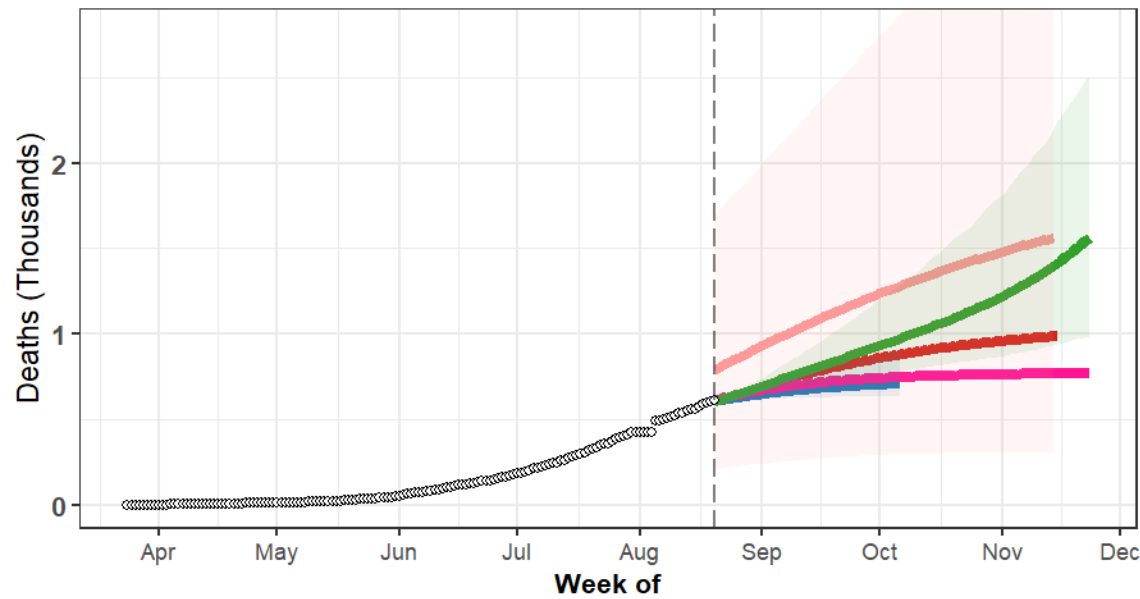

## Cumulative Out-Of-Sample Error (Post Intercept Shift)

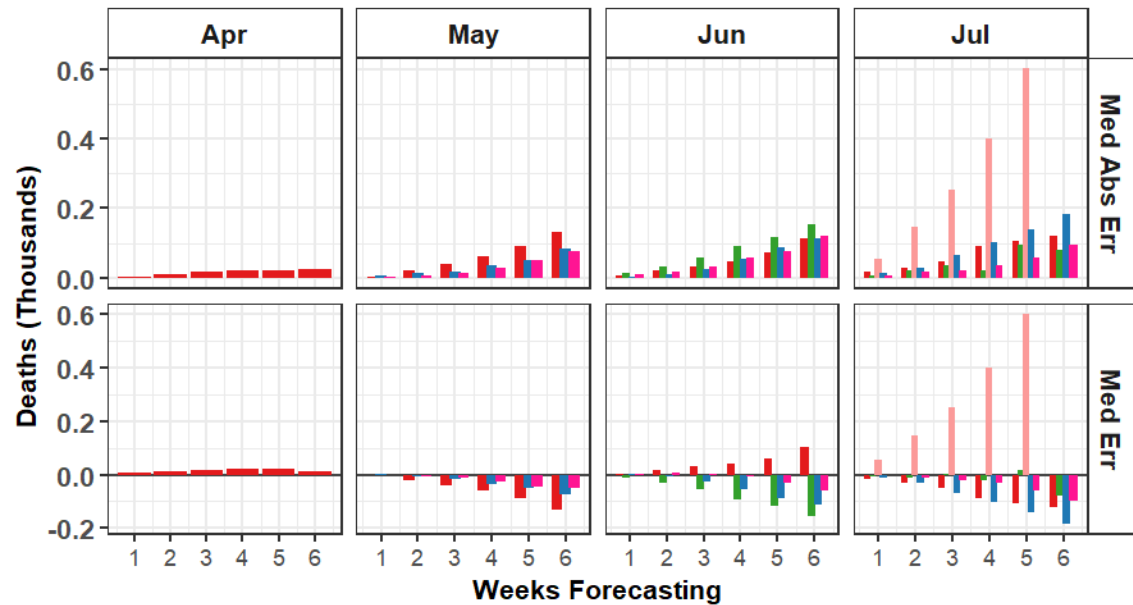

## All Model Versions

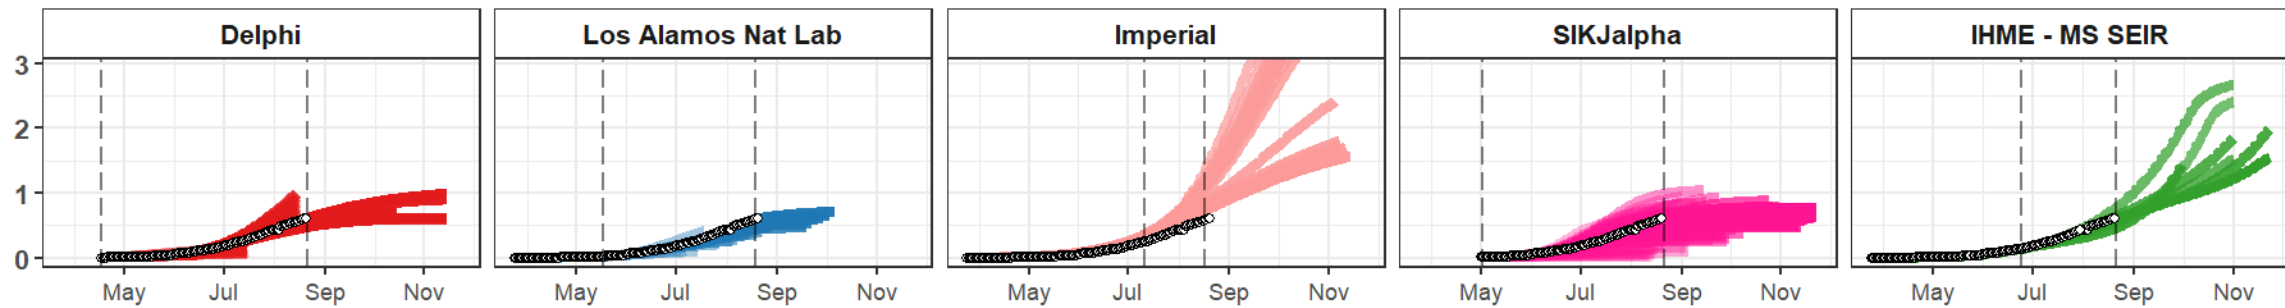

## All Cumulative Errors

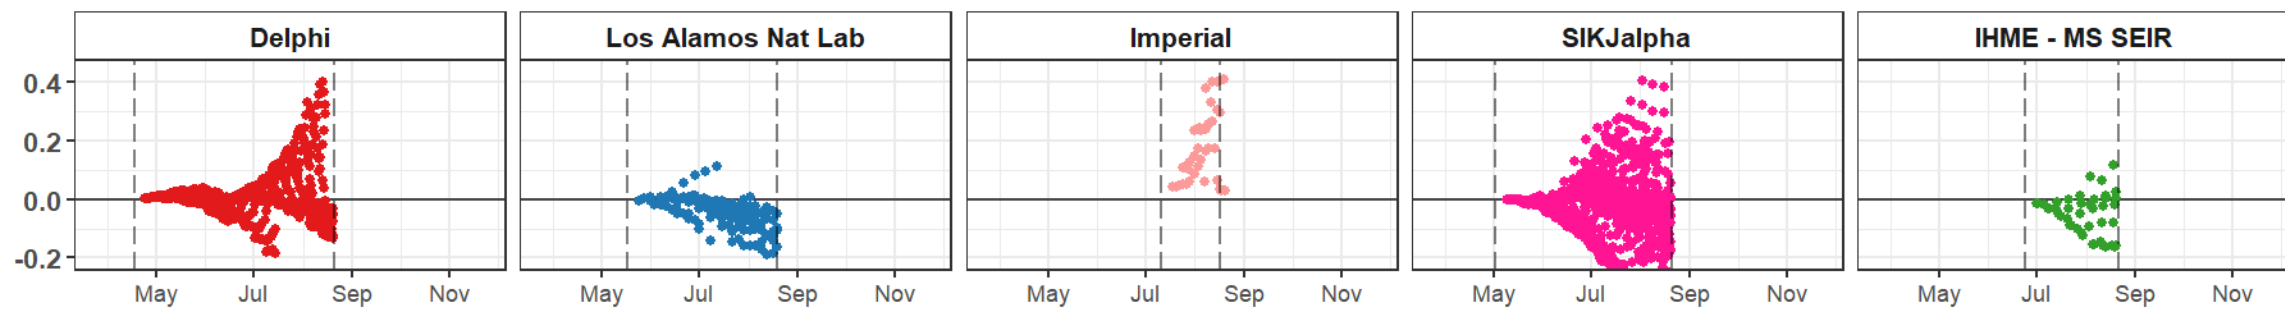

# District of Columbia

## Current Forecast

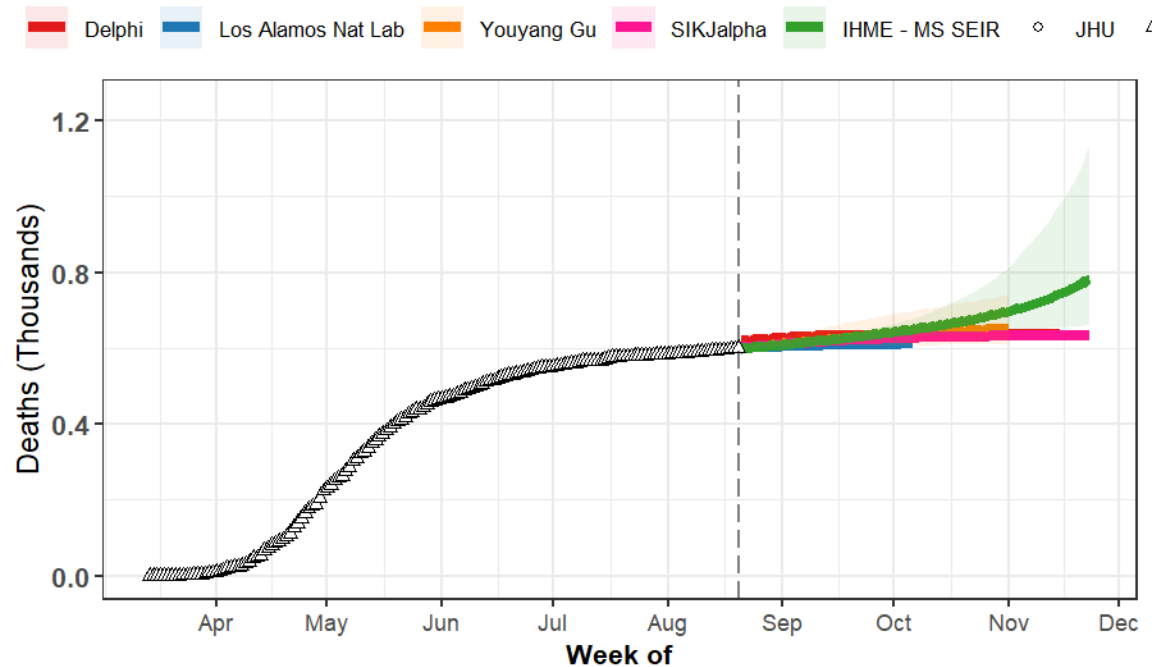

## Cumulative Out-Of-Sample Error (Post Intercept Shift)

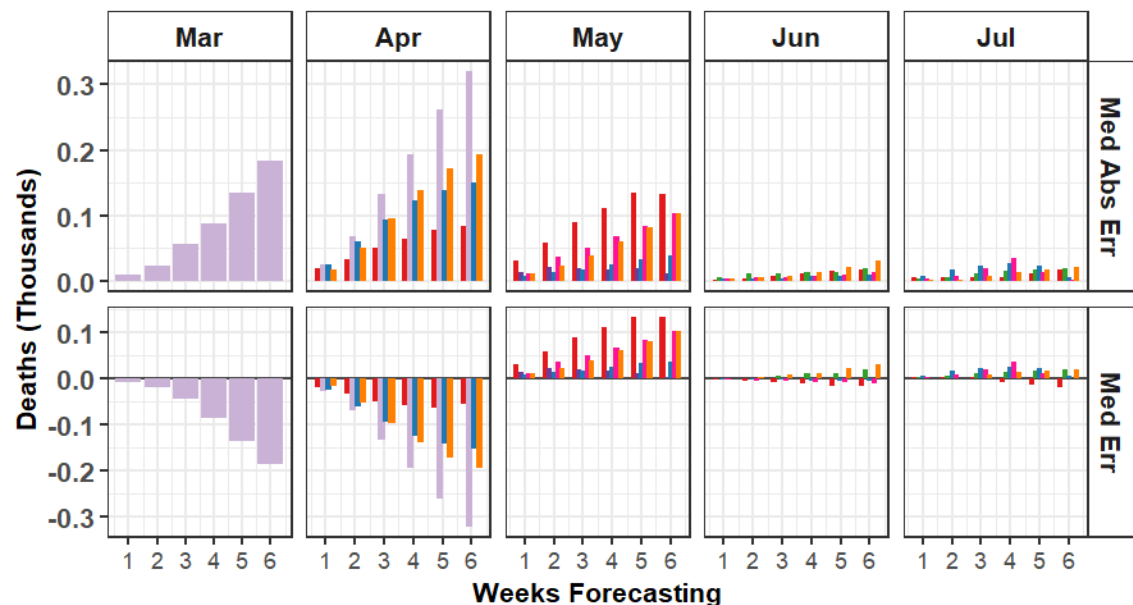

## All Model Versions

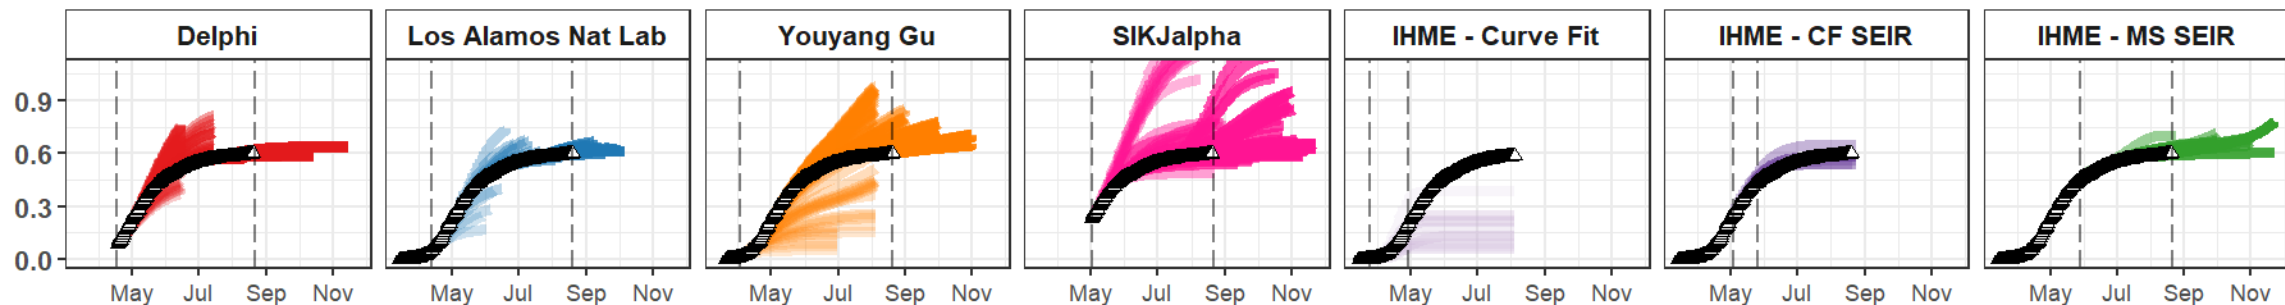

## All Cumulative Errors

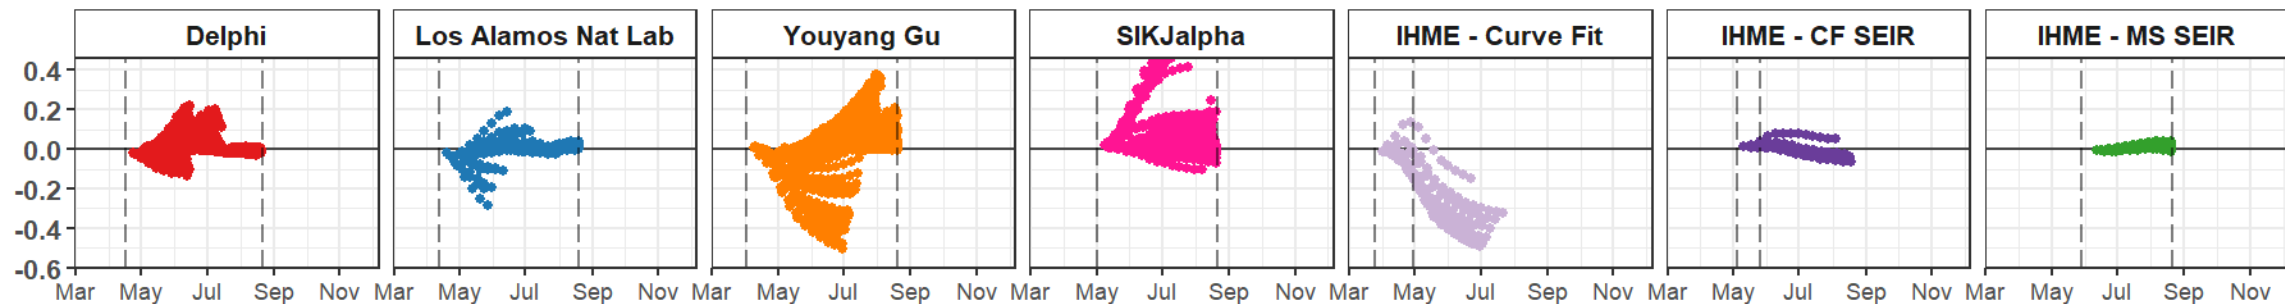

# Delaware

## Current Forecast

Delphi Los Alamos Nat Lab Youyang Gu SIKJalpha IHME - MS SEIR JHU

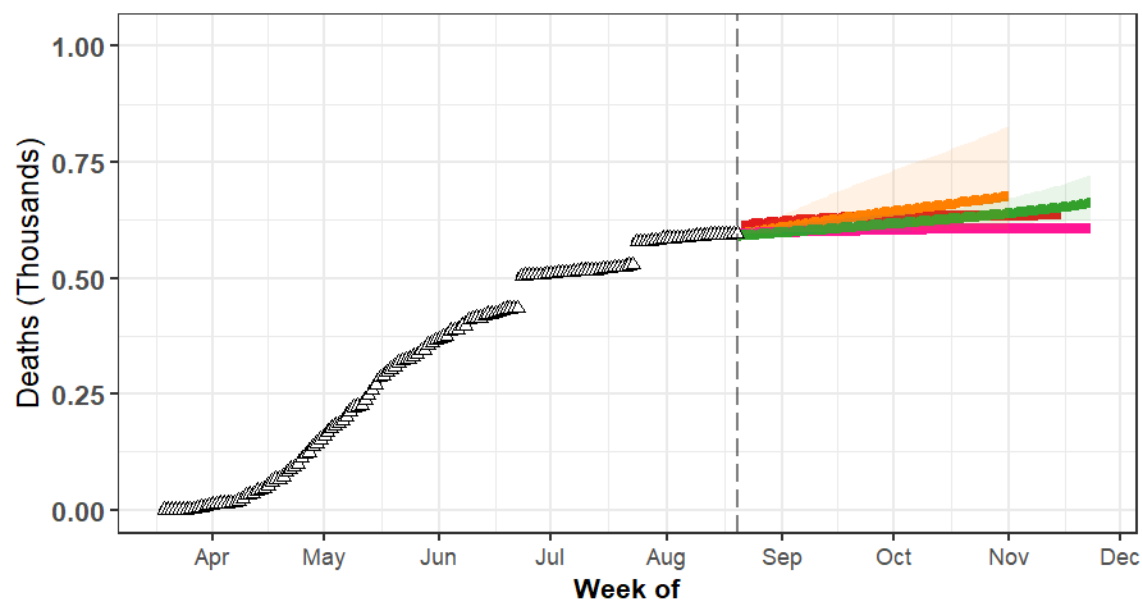

## Cumulative Out-Of-Sample Error (Post Intercept Shift)

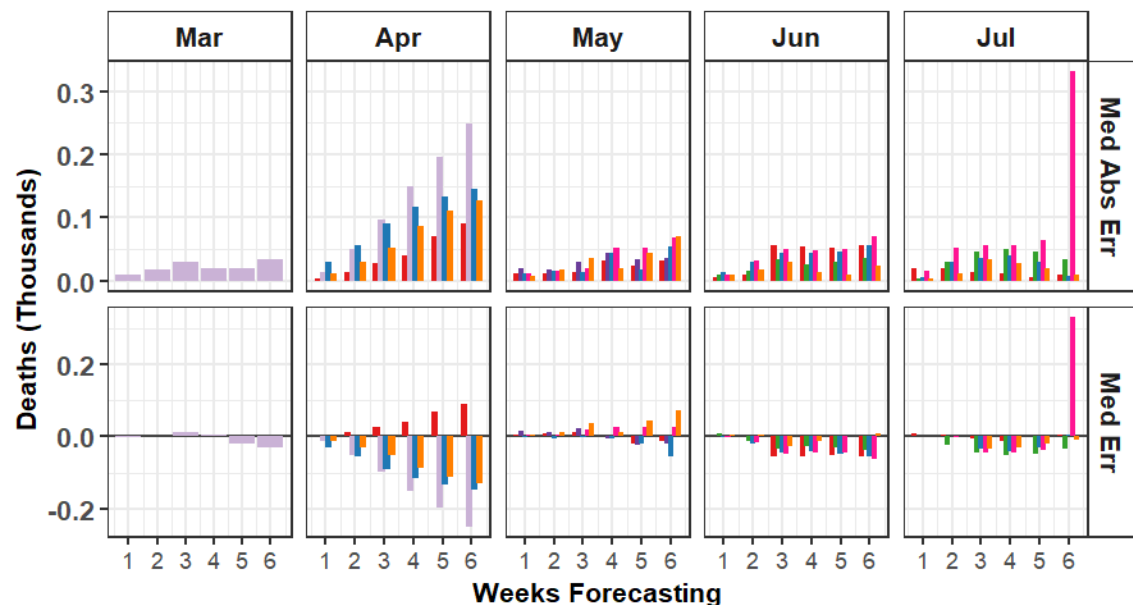

## All Model Versions

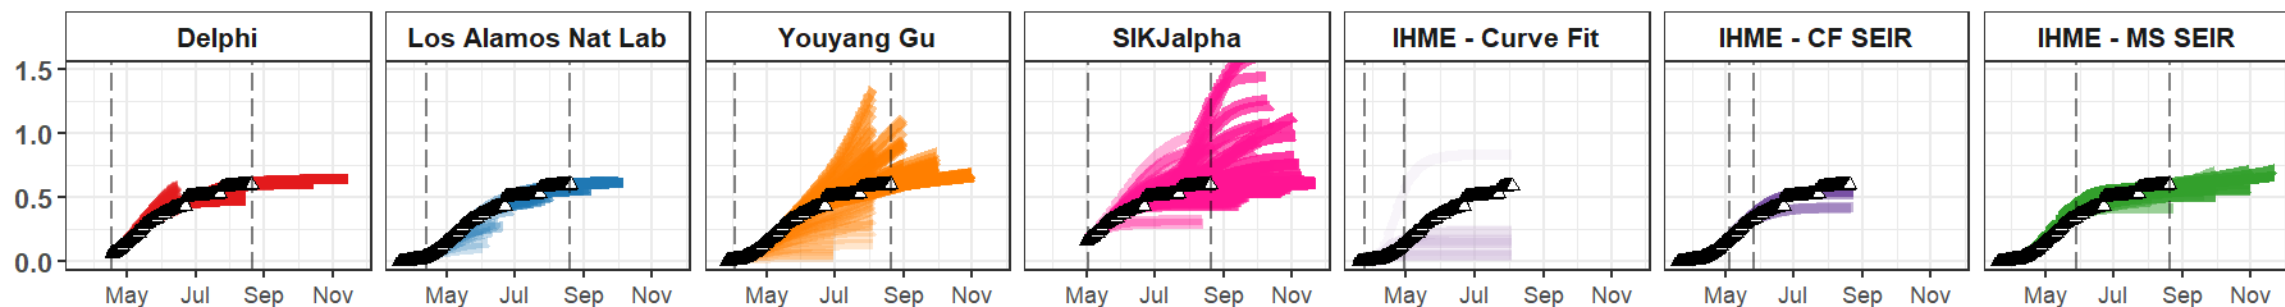

## All Cumulative Errors

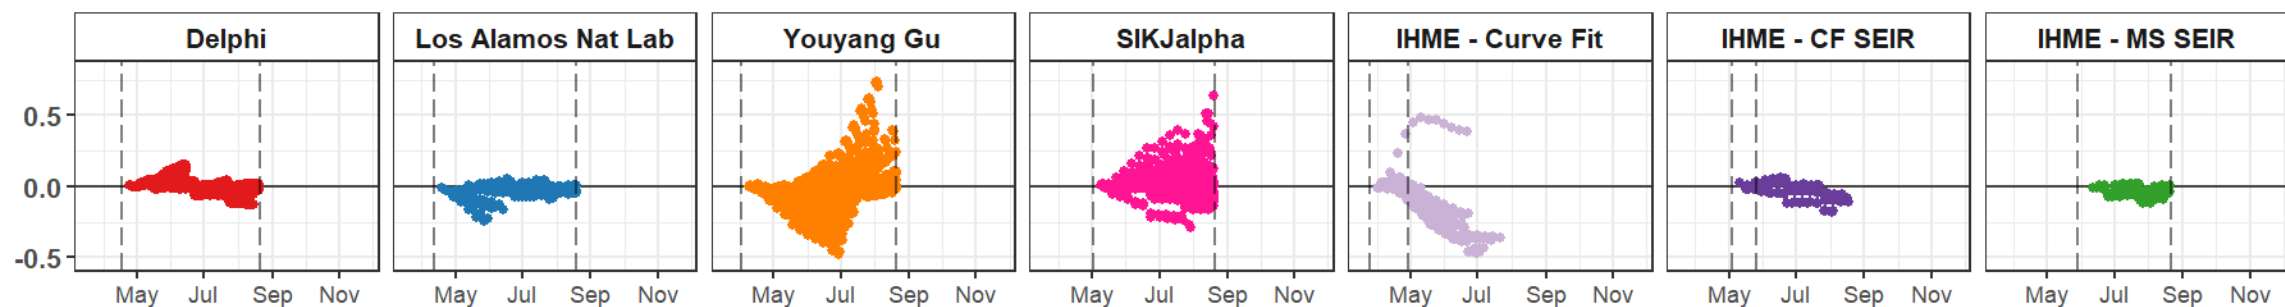

# Macedonia

## Current Forecast

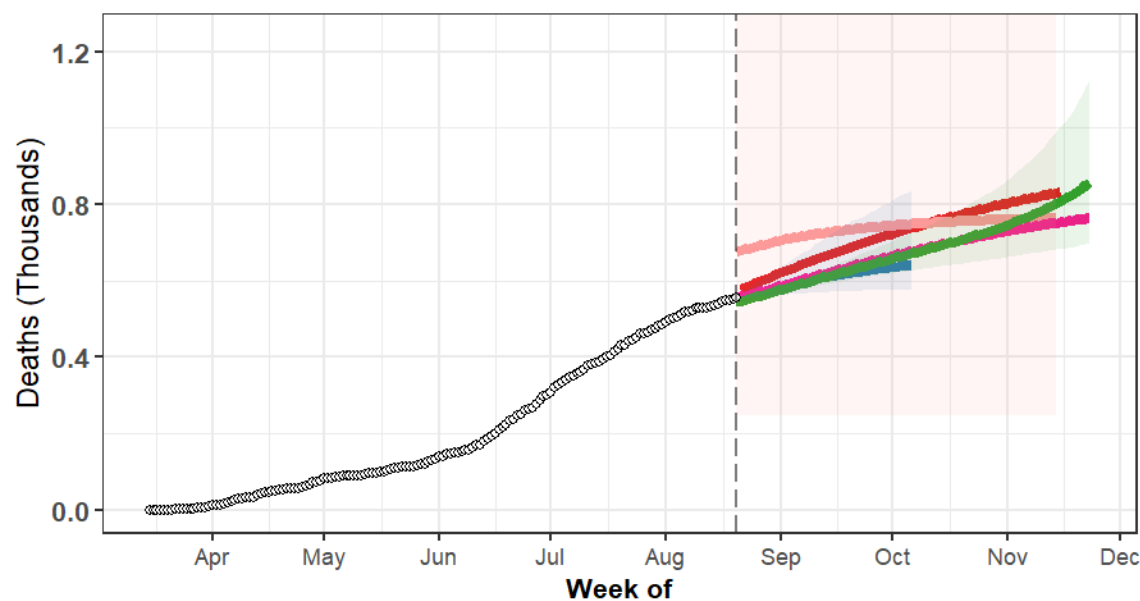

## Cumulative Out-Of-Sample Error (Post Intercept Shift)

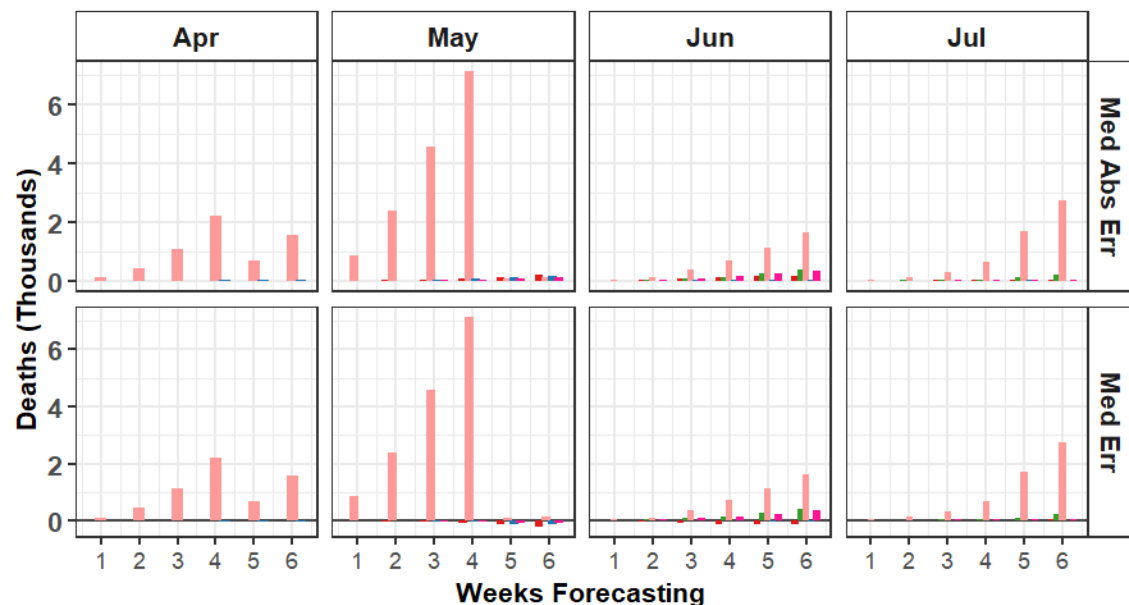

## All Model Versions

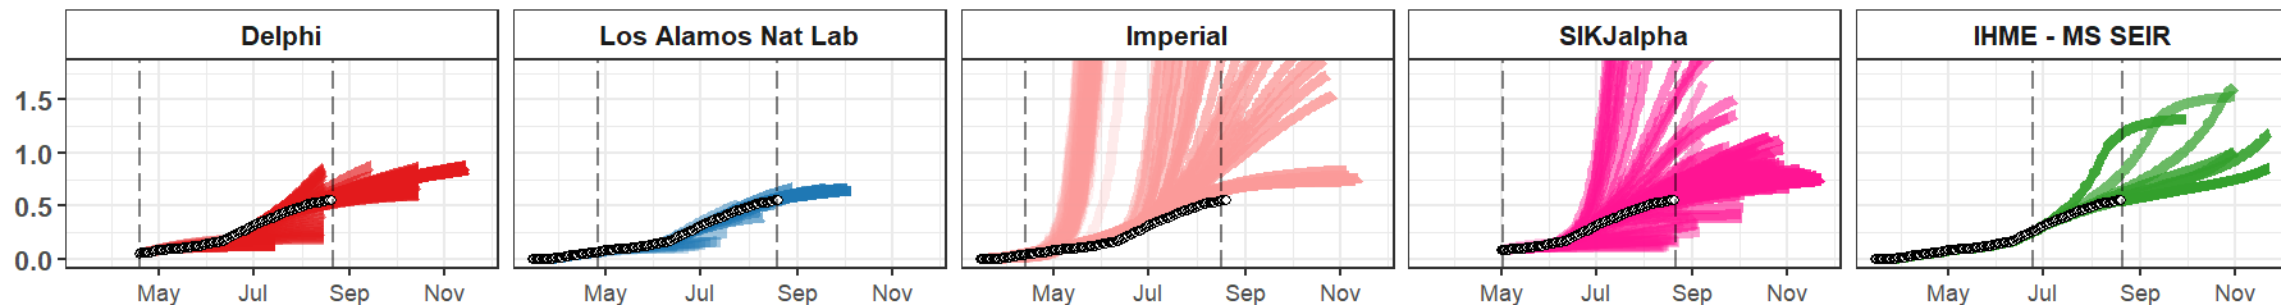

## All Cumulative Errors

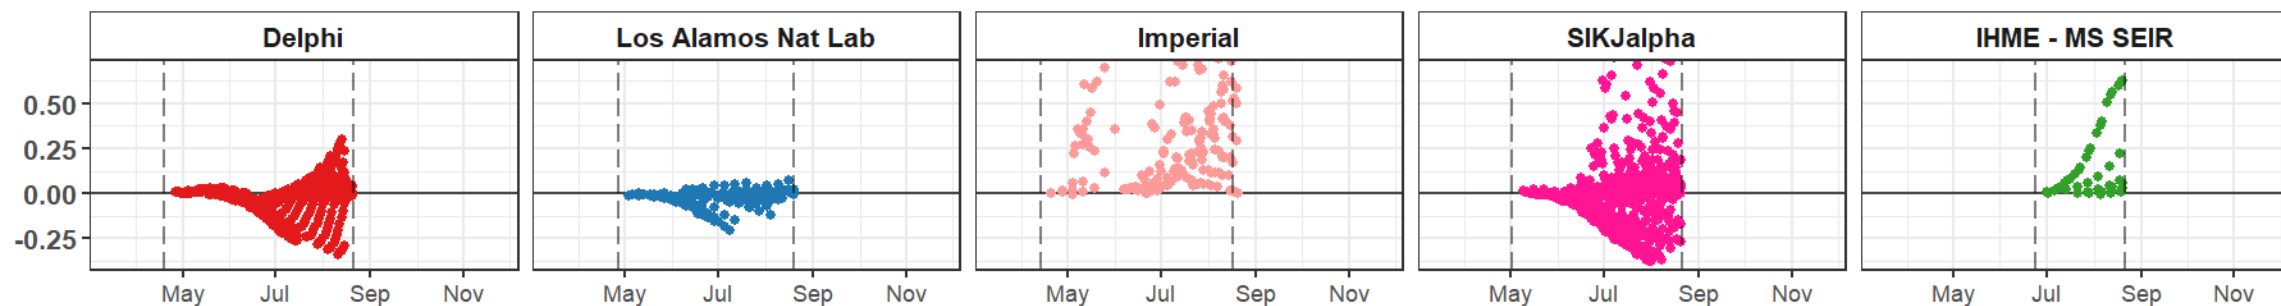

# Yemen

## Current Forecast

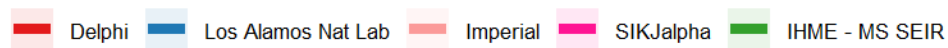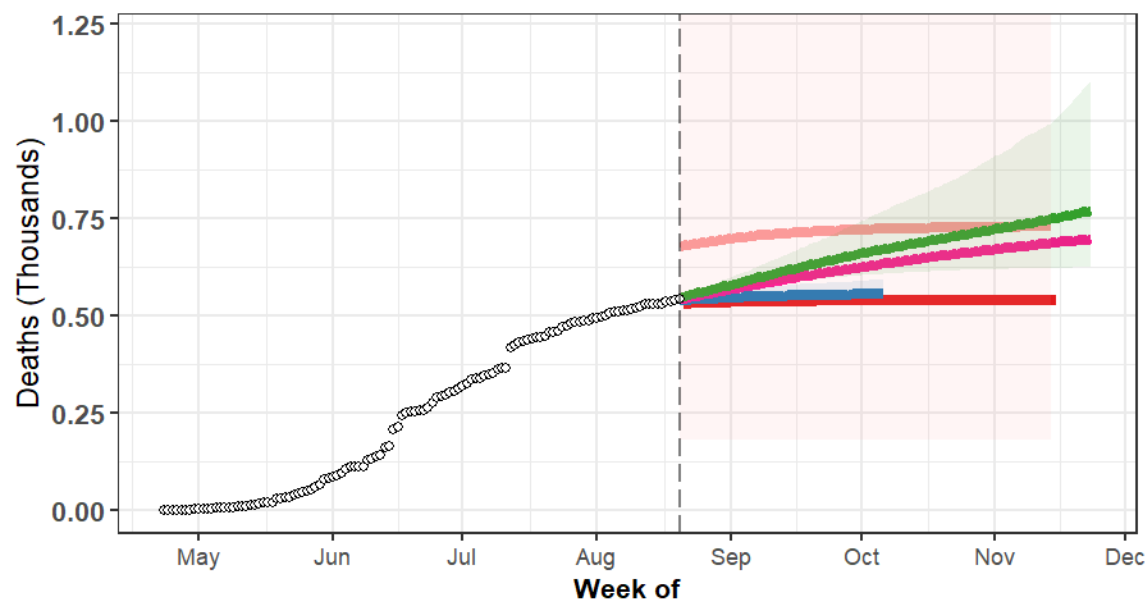

## Cumulative Out-Of-Sample Error (Post Intercept Shift)

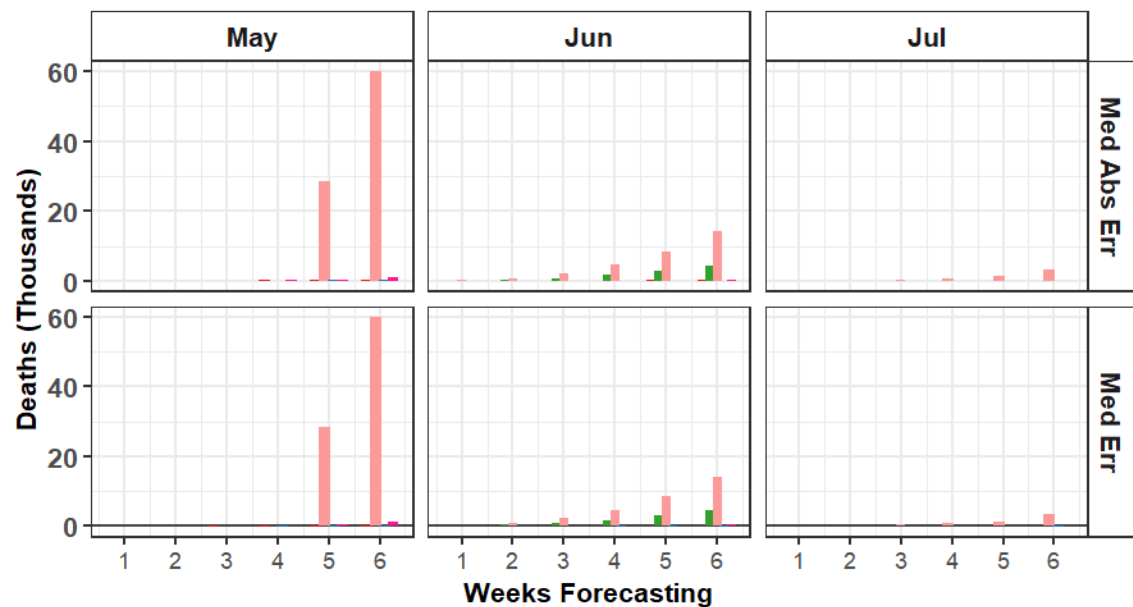

## All Model Versions

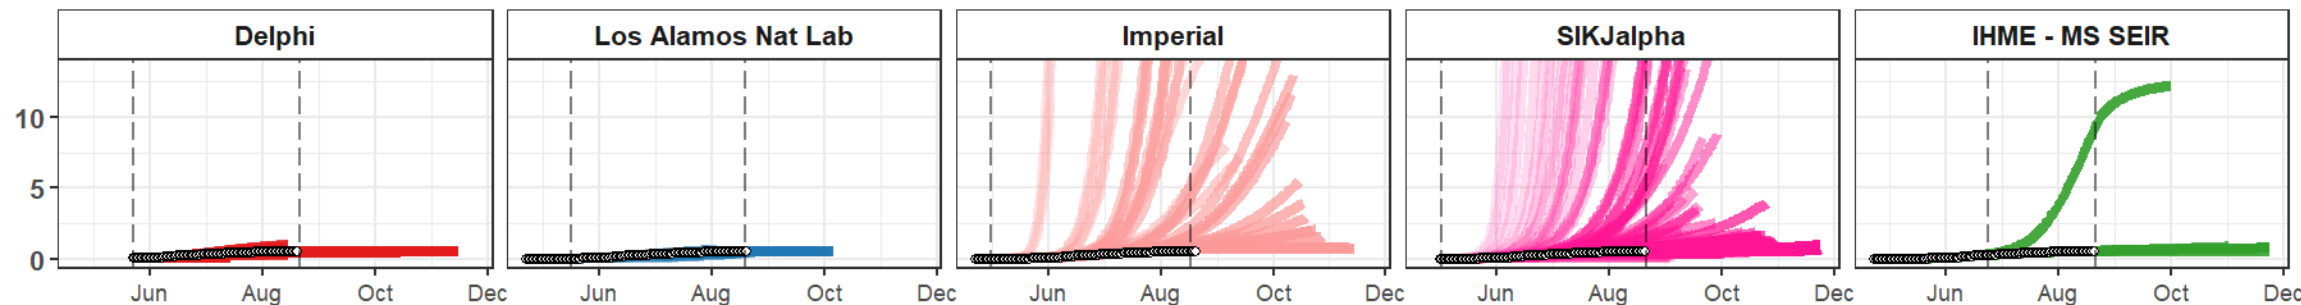

## All Cumulative Errors

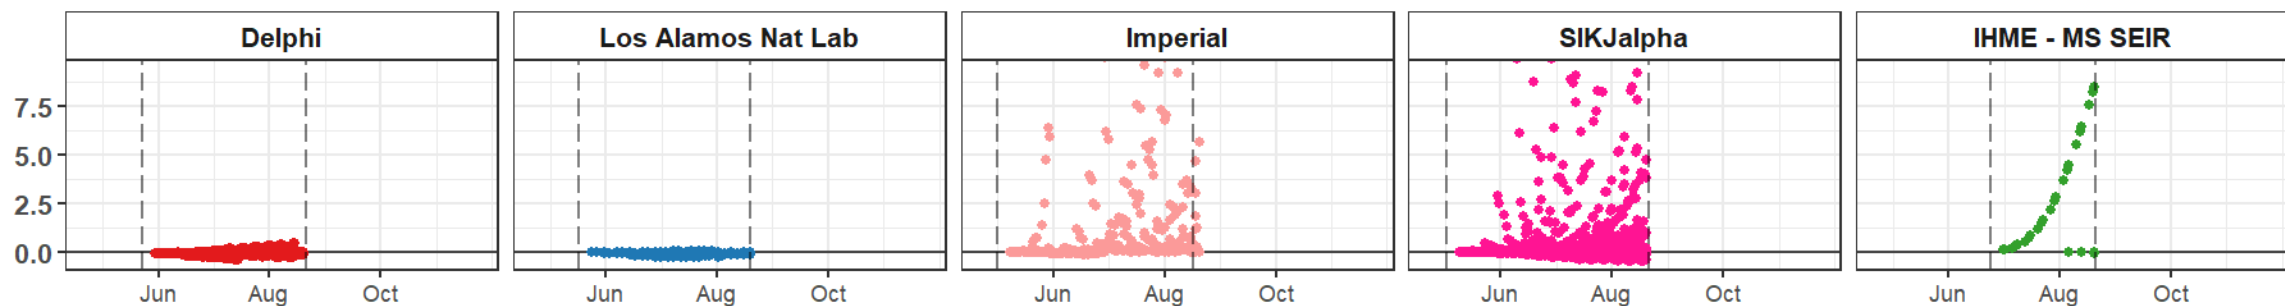



# Bulgaria

## Current Forecast

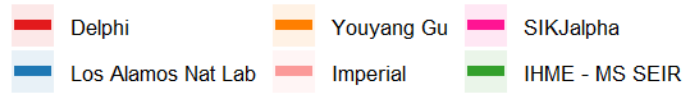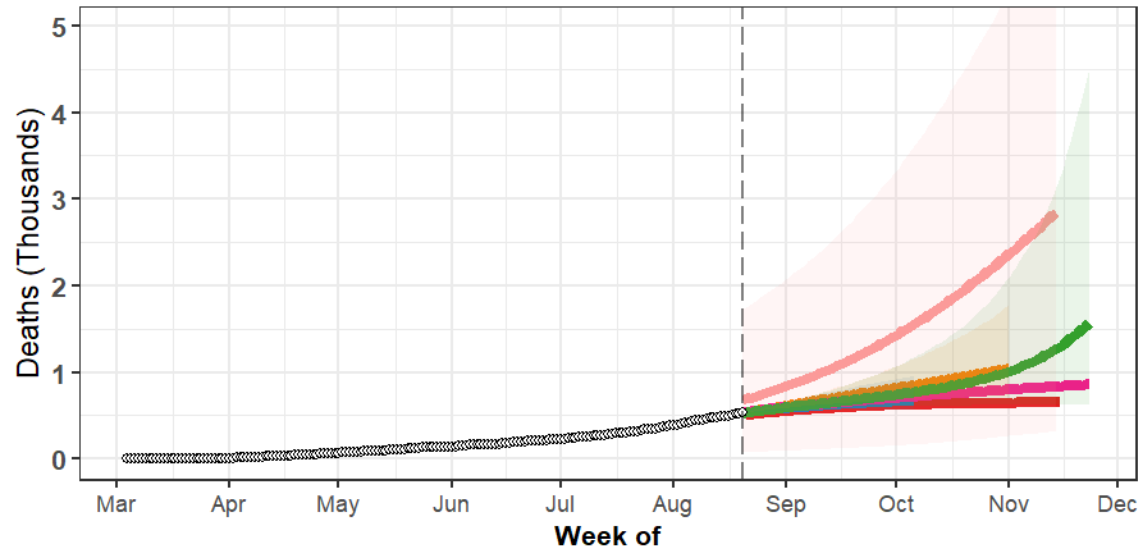

## Cumulative Out-Of-Sample Error (Post Intercept Shift)

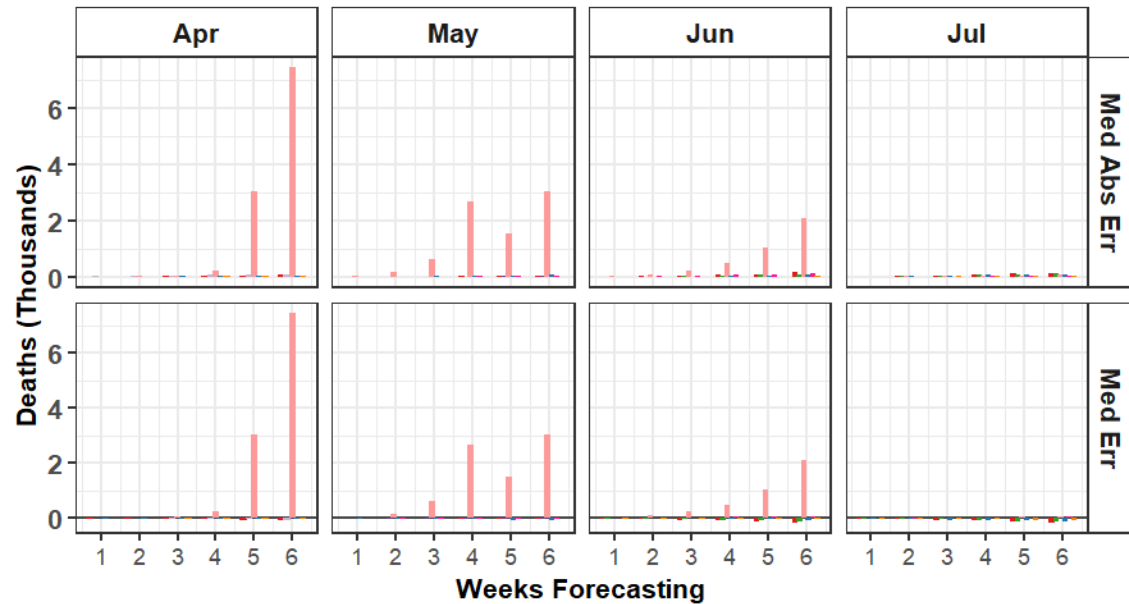

## All Model Versions

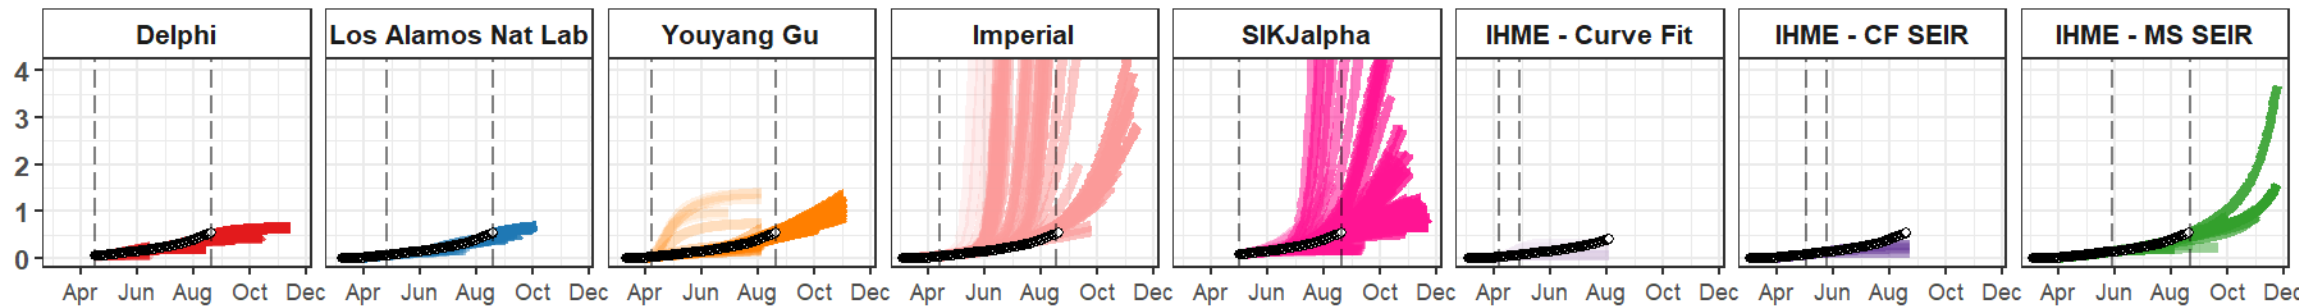

## All Cumulative Errors

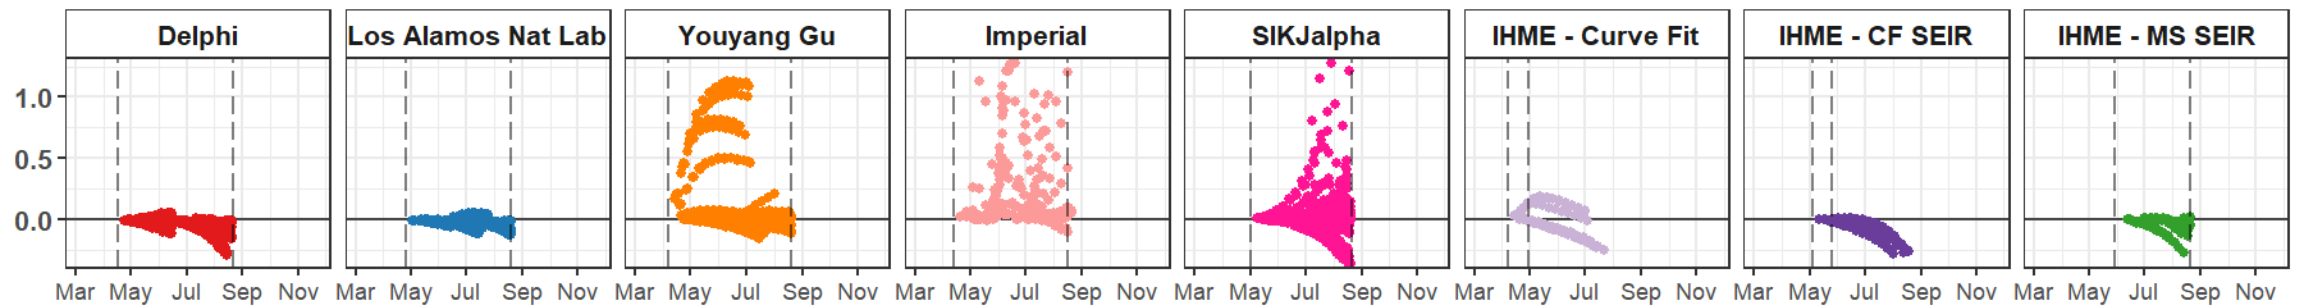

# Kenya

## Current Forecast

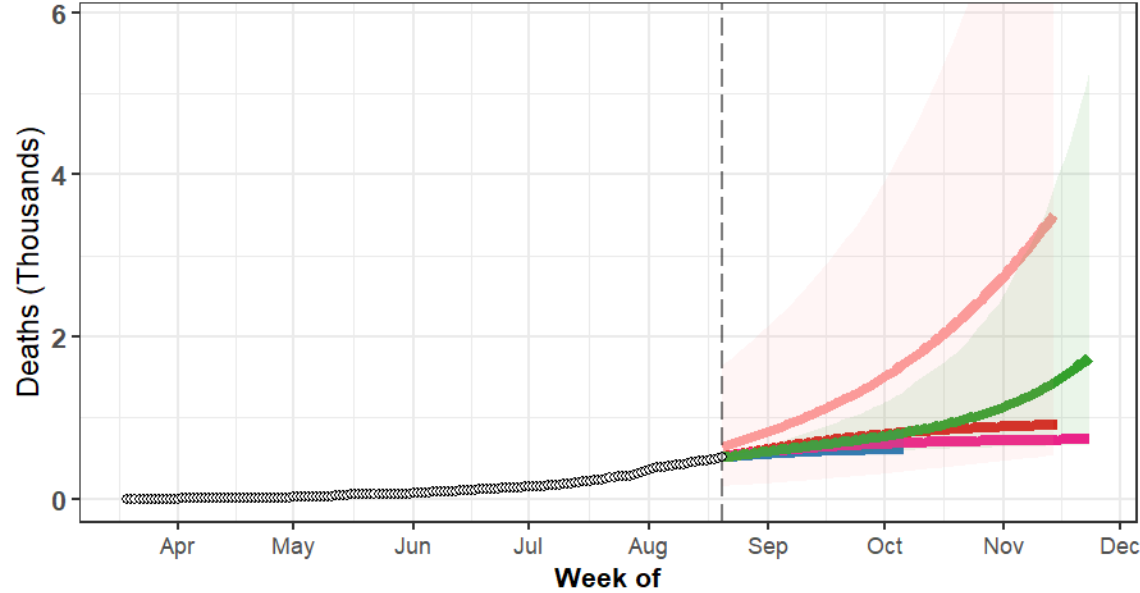

## Cumulative Out-Of-Sample Error (Post Intercept Shift)

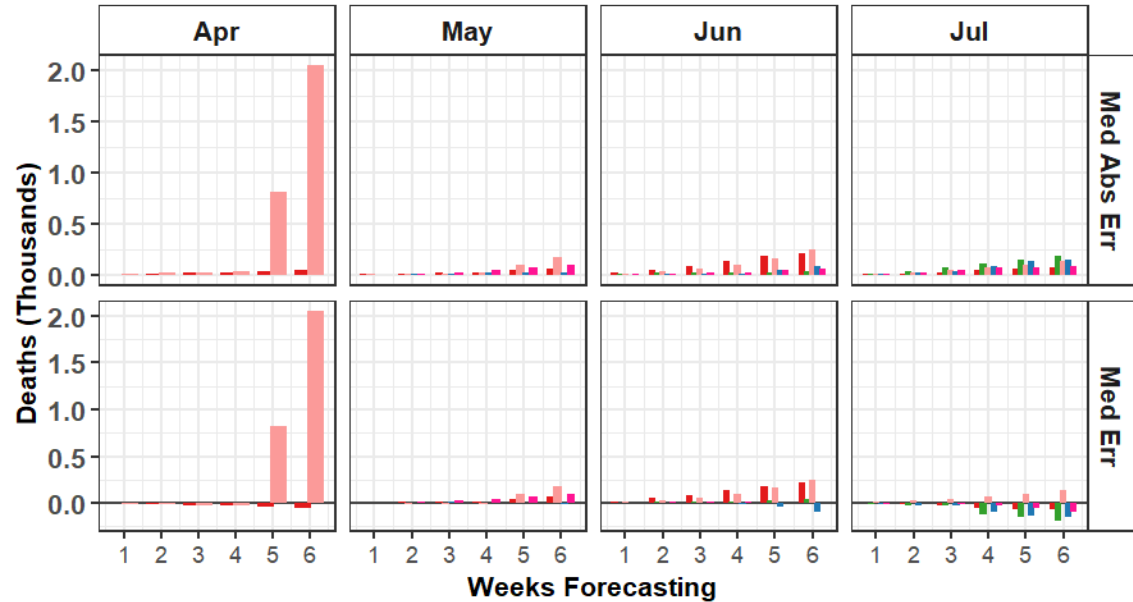

## All Model Versions

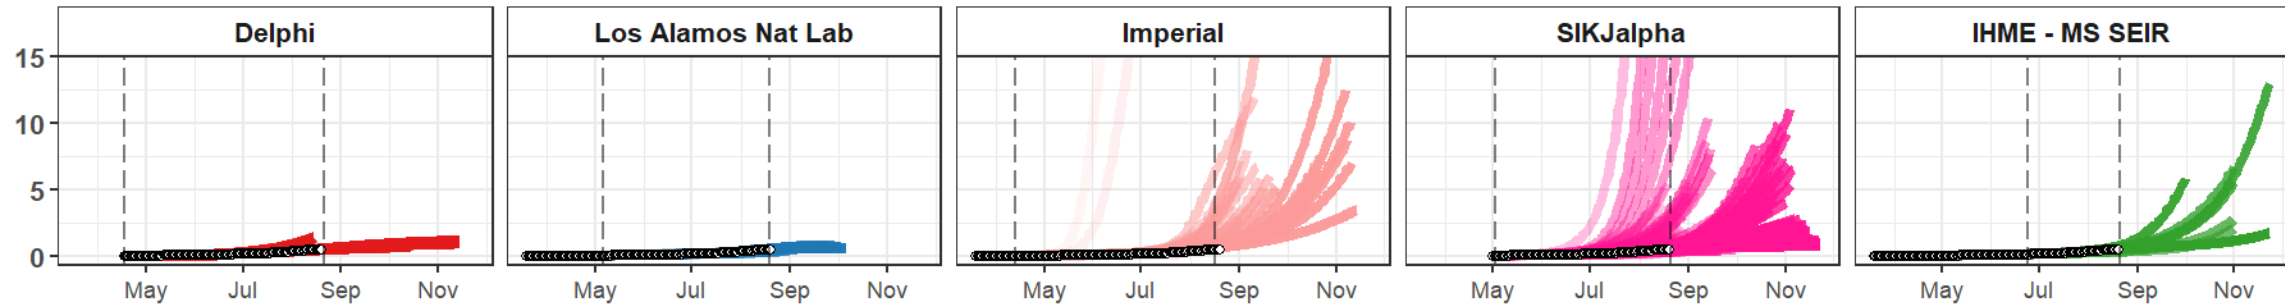

## All Cumulative Errors

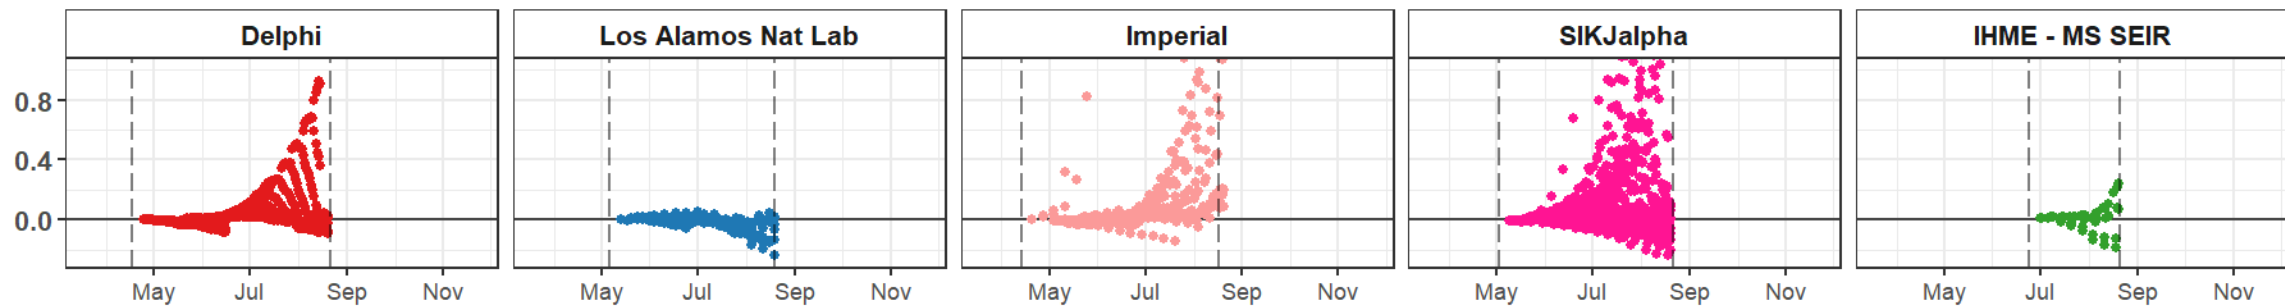

# Bosnia and Herzegovina

## Current Forecast

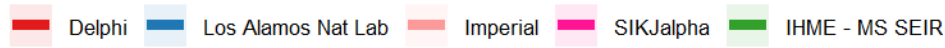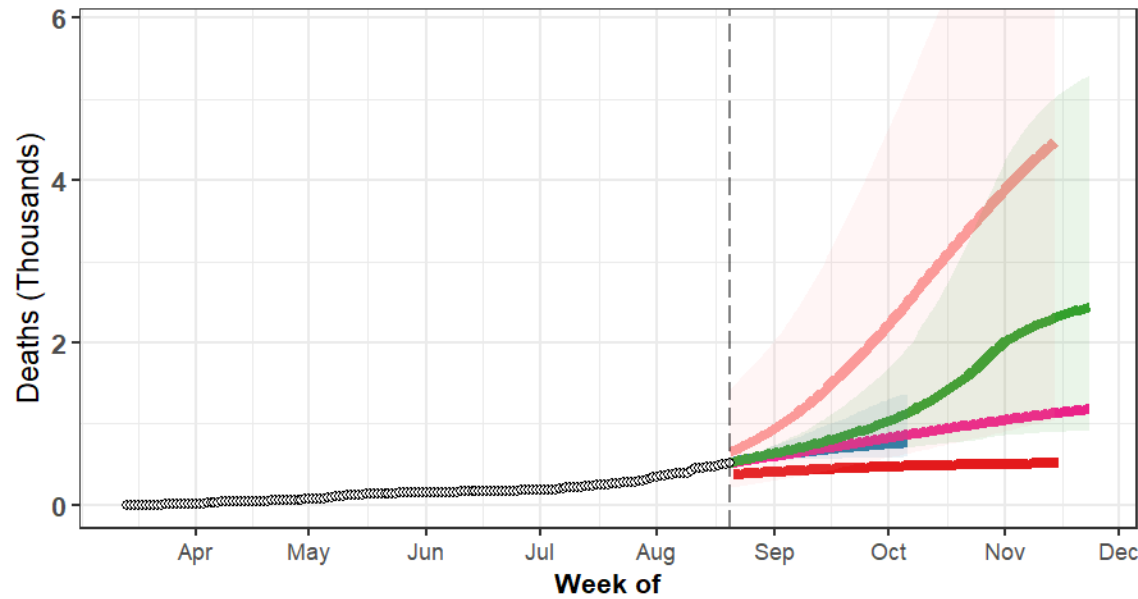

## Cumulative Out-Of-Sample Error (Post Intercept Shift)

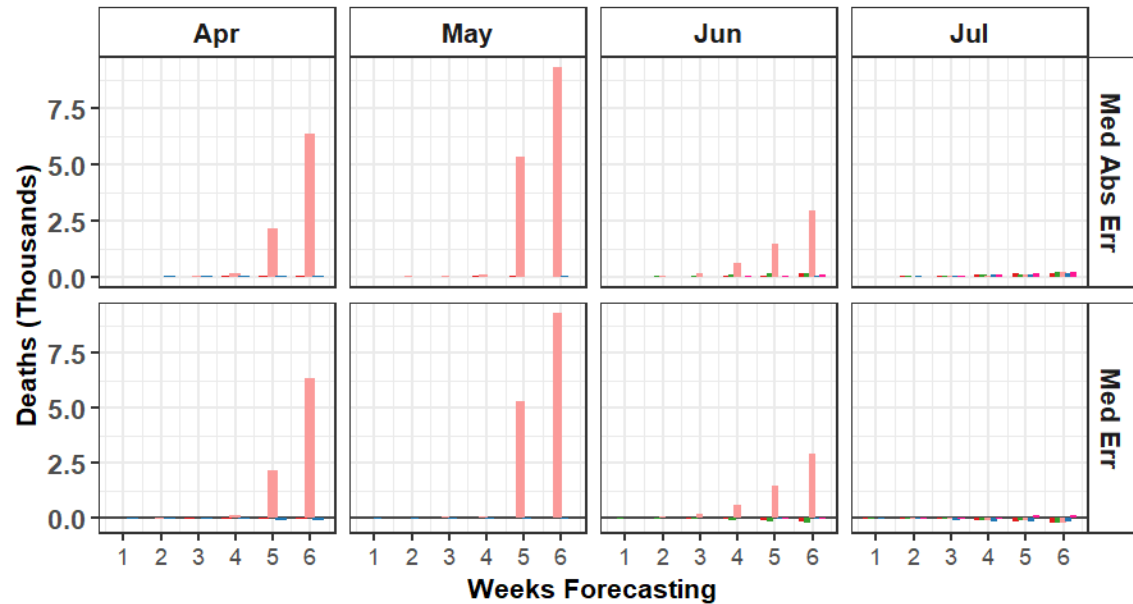

## All Model Versions

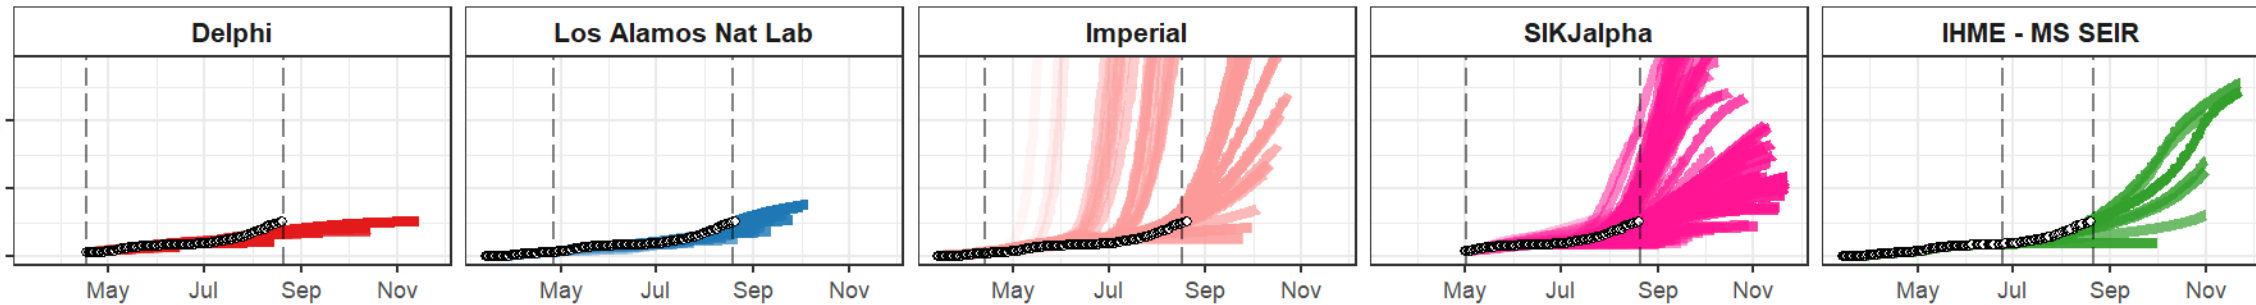

## All Cumulative Errors

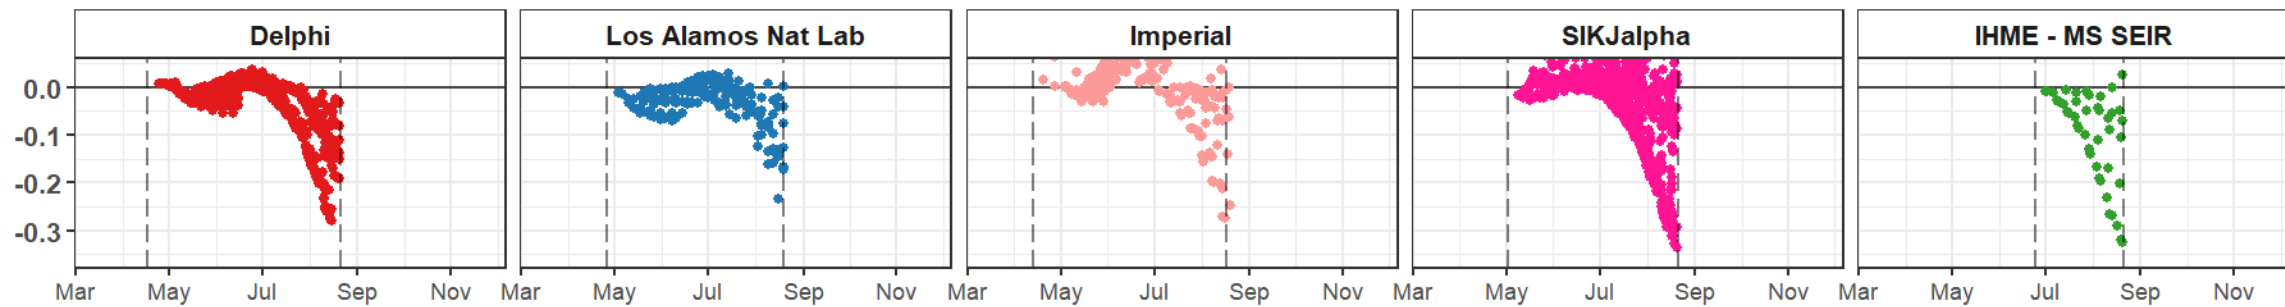

# Azerbaijan

## Current Forecast

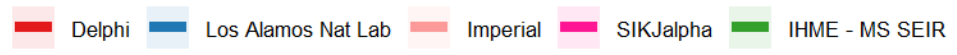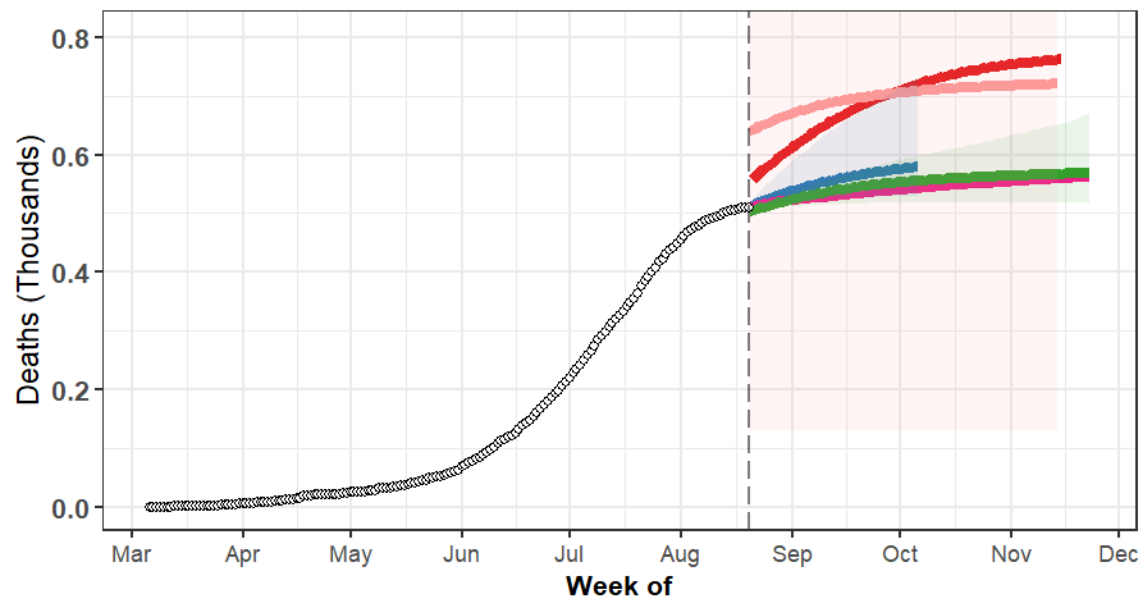

## Cumulative Out-Of-Sample Error (Post Intercept Shift)

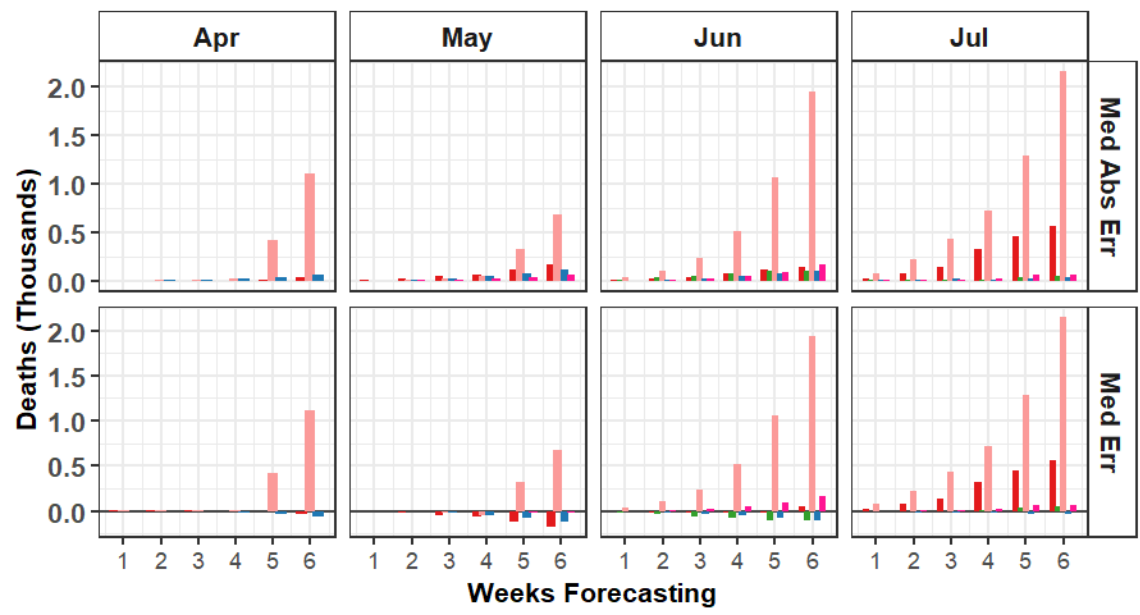

## All Model Versions

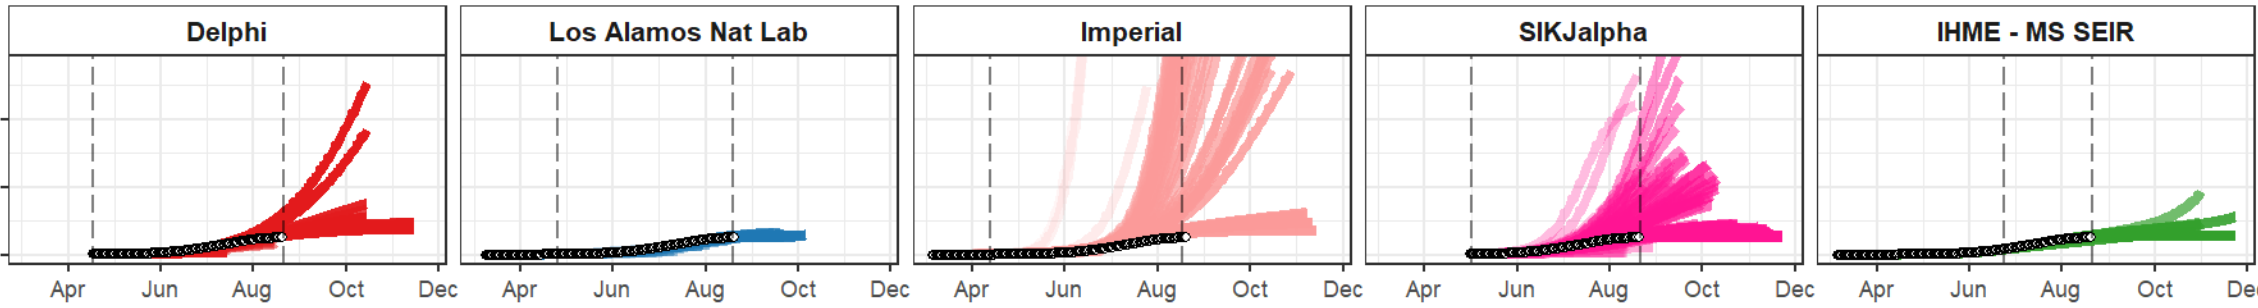

## All Cumulative Errors

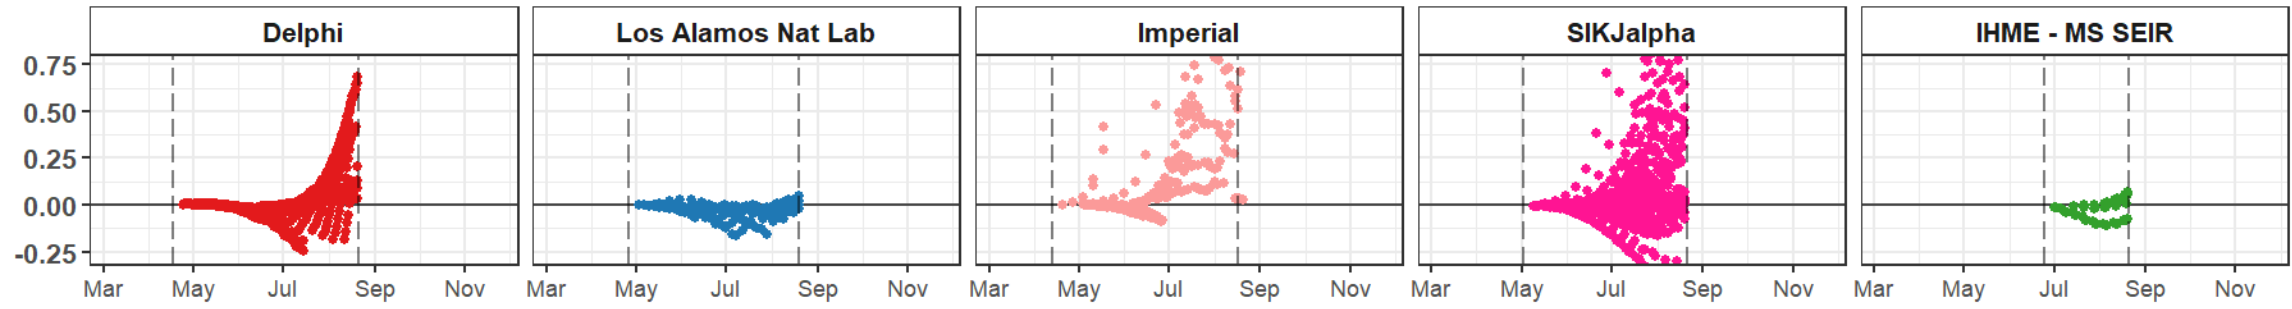

# Kuwait

## Current Forecast

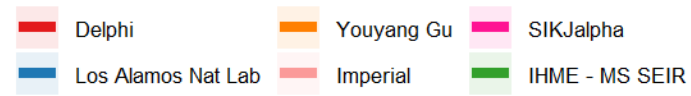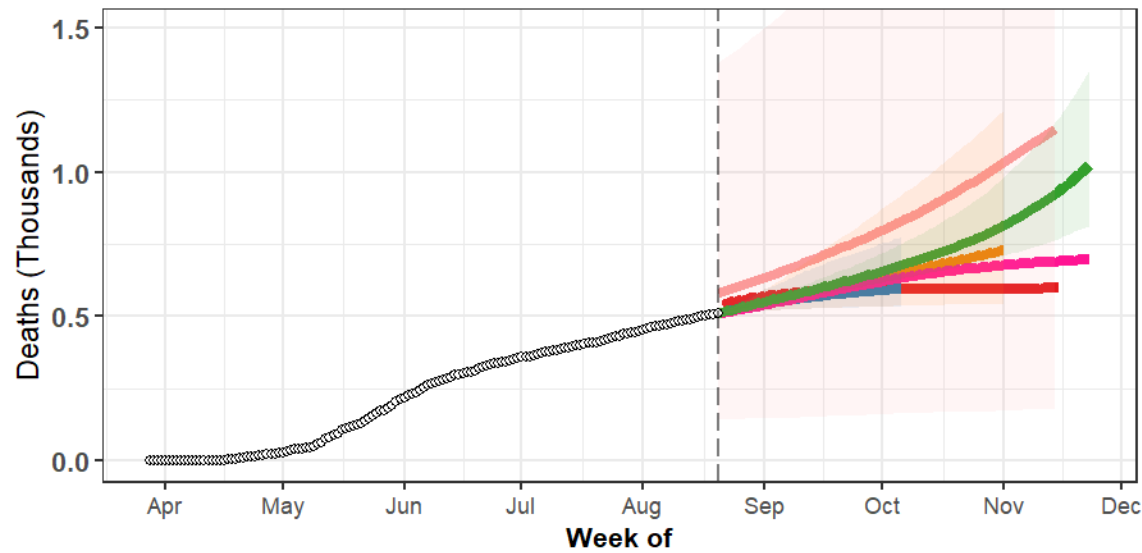

## Cumulative Out-Of-Sample Error (Post Intercept Shift)

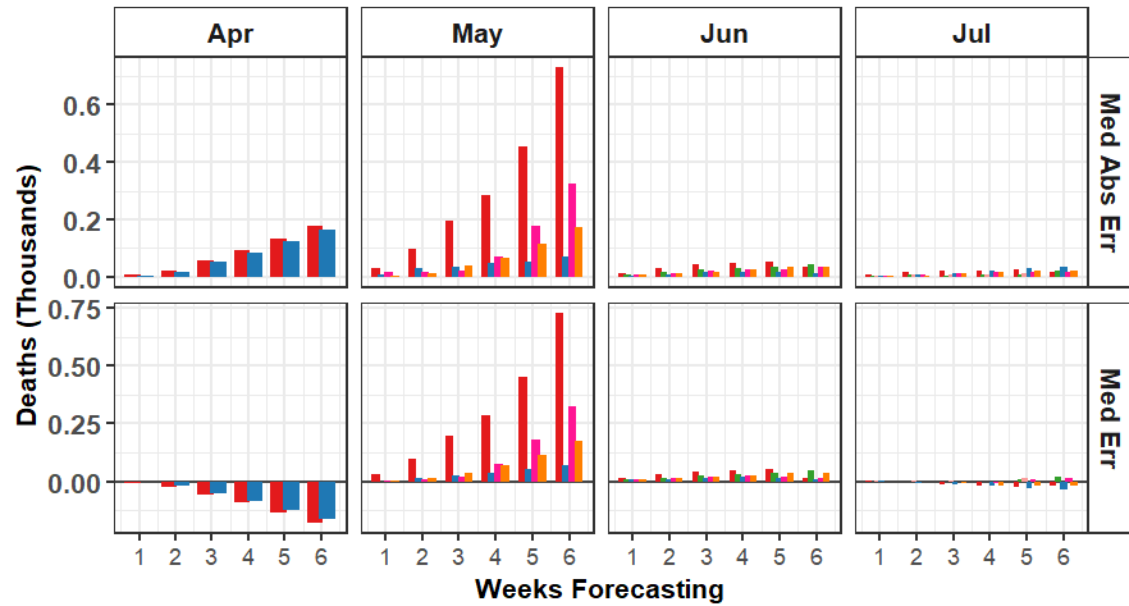

## All Model Versions

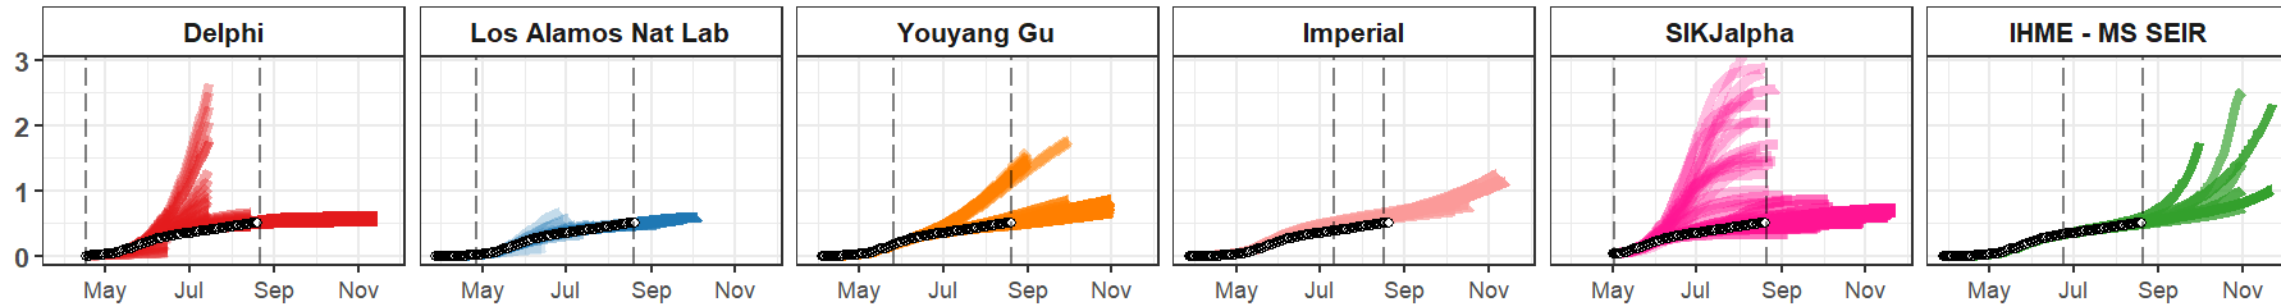

## All Cumulative Errors

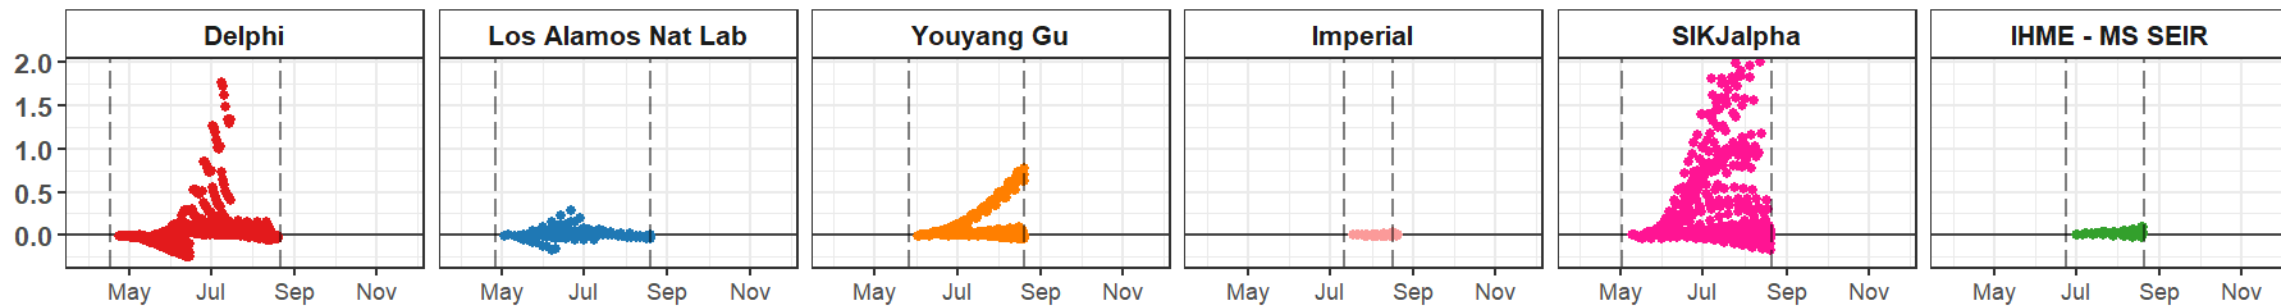

# Australia

## Current Forecast

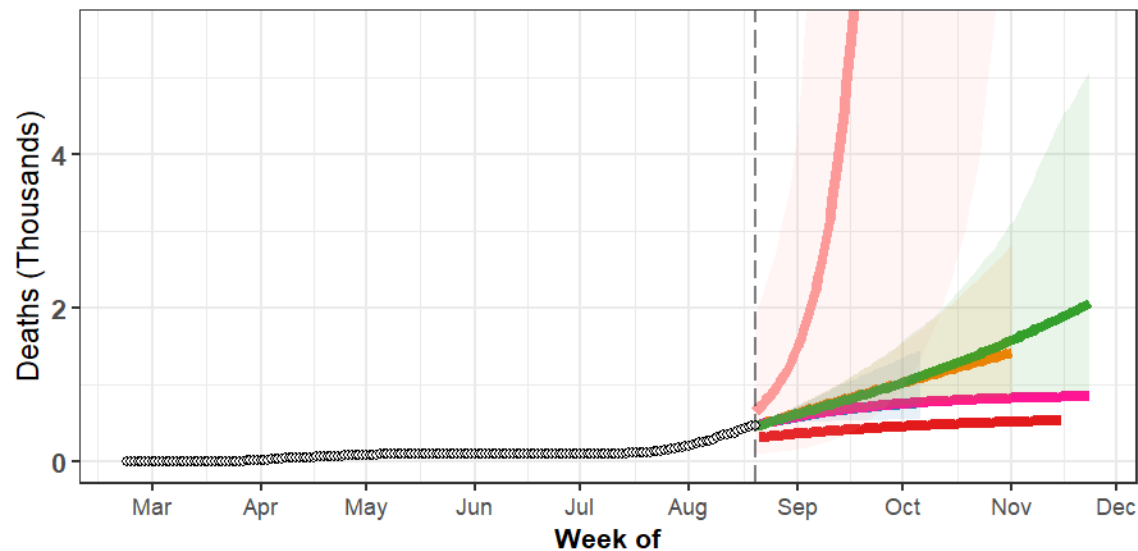

## Cumulative Out-Of-Sample Error (Post Intercept Shift)

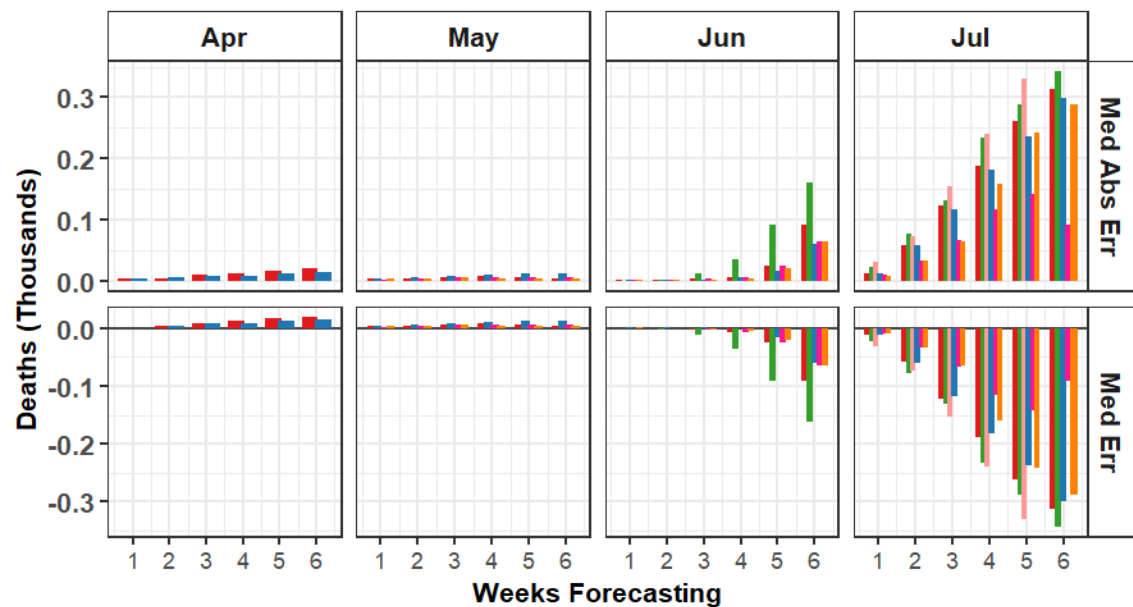

## All Model Versions

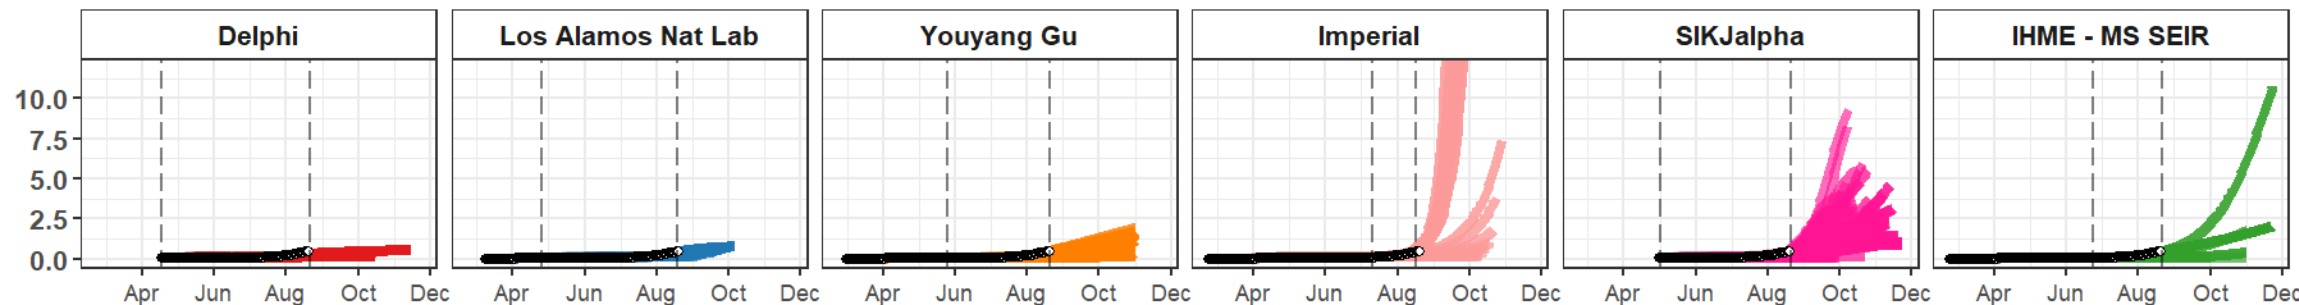

## All Cumulative Errors

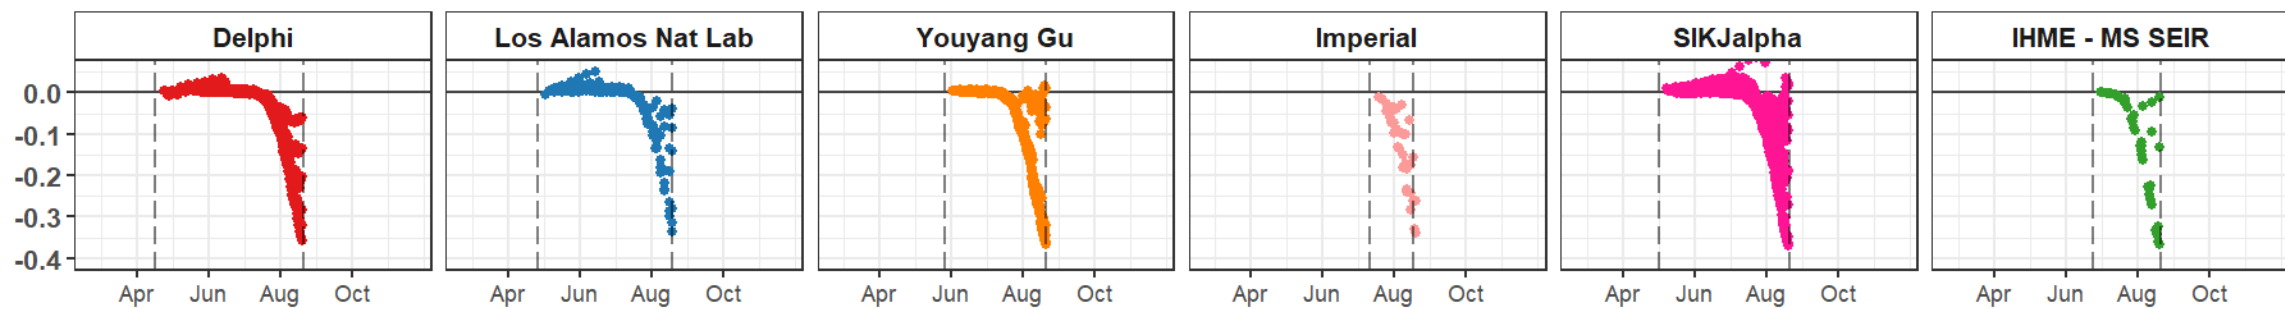

# New Hampshire

## Current Forecast

## Cumulative Out-Of-Sample Error (Post Intercept Shift)

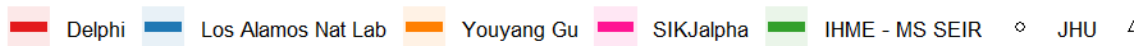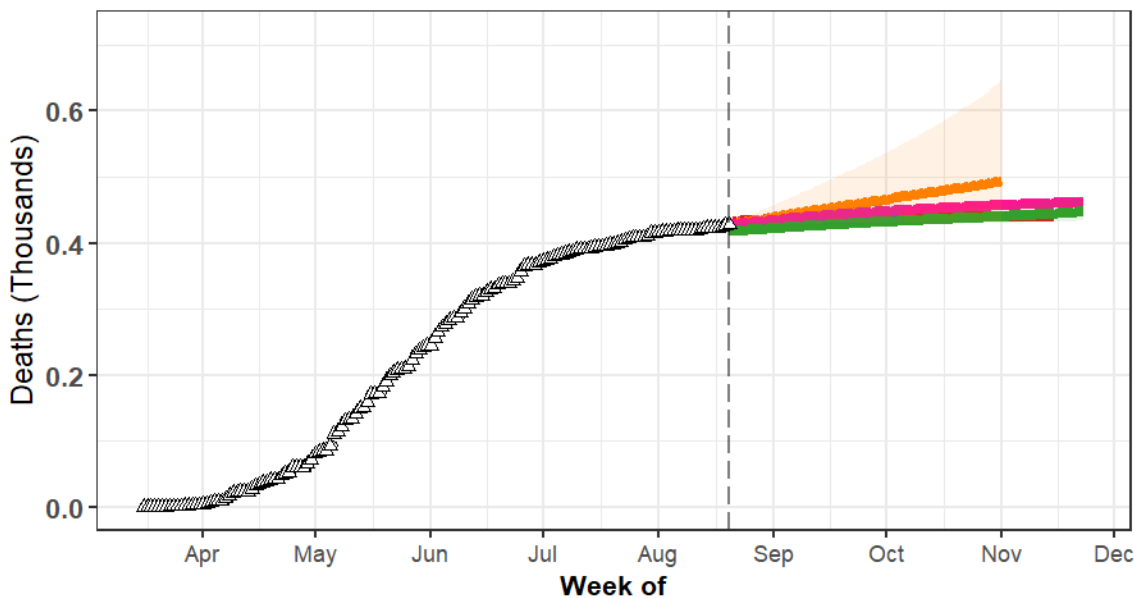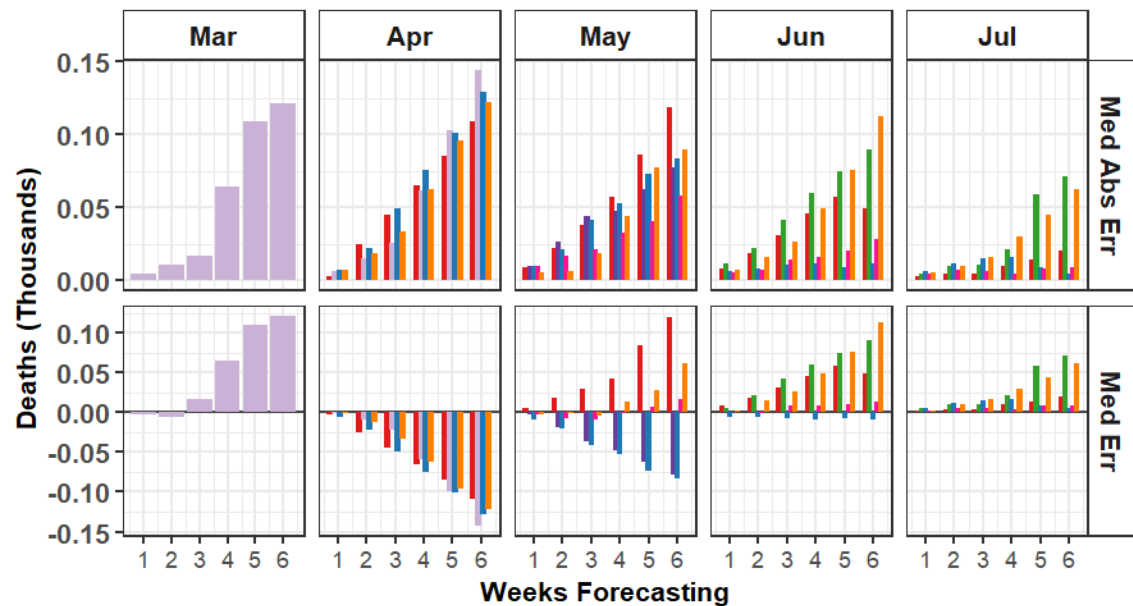

## All Model Versions

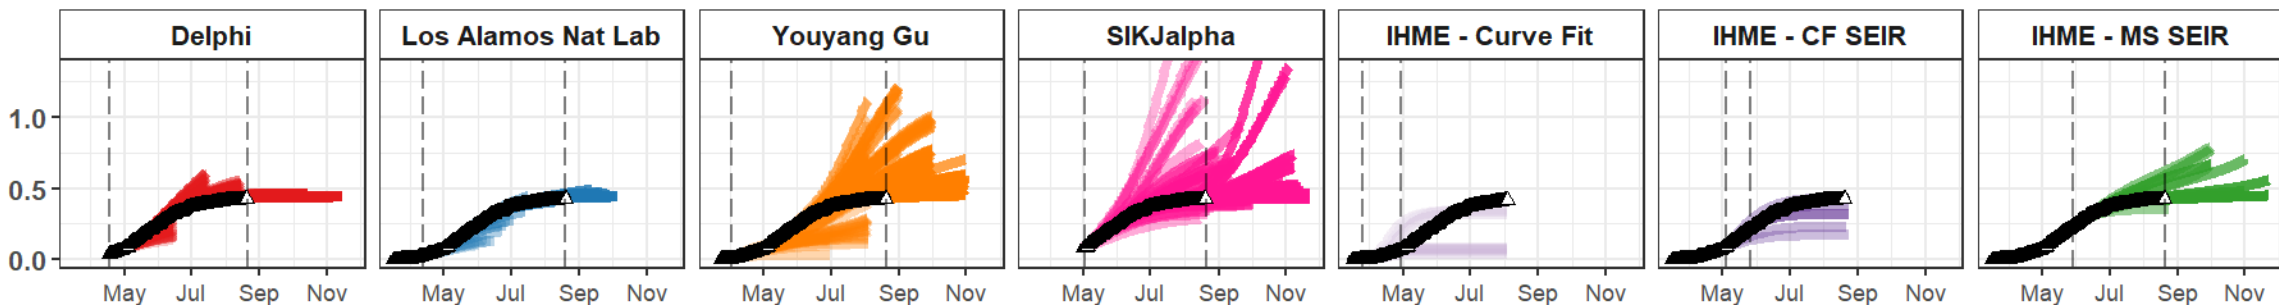

## All Cumulative Errors

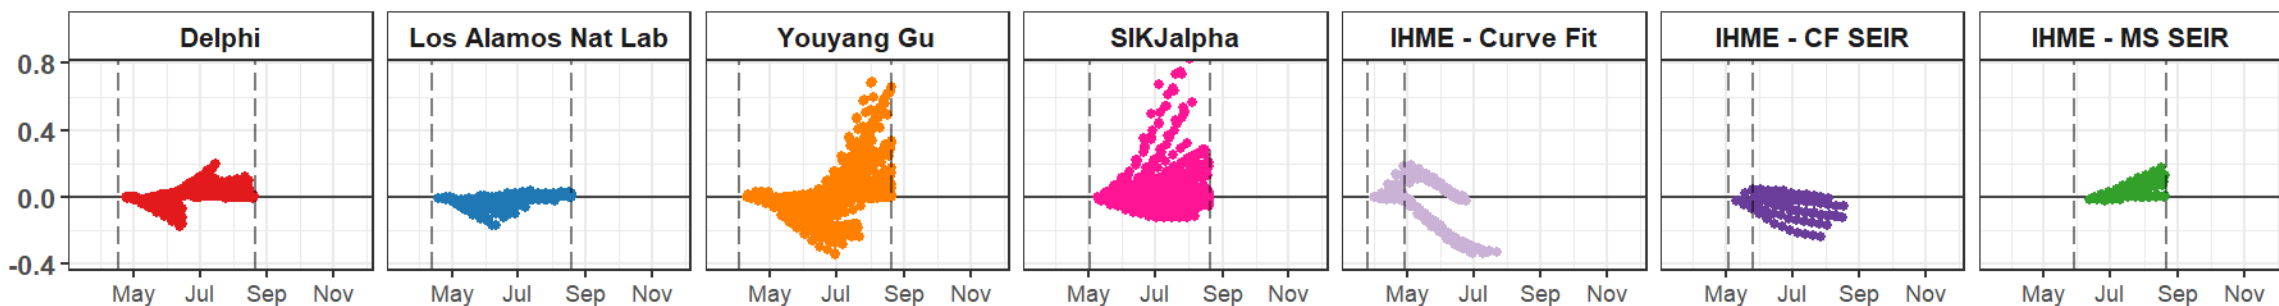

# Kansas

## Current Forecast

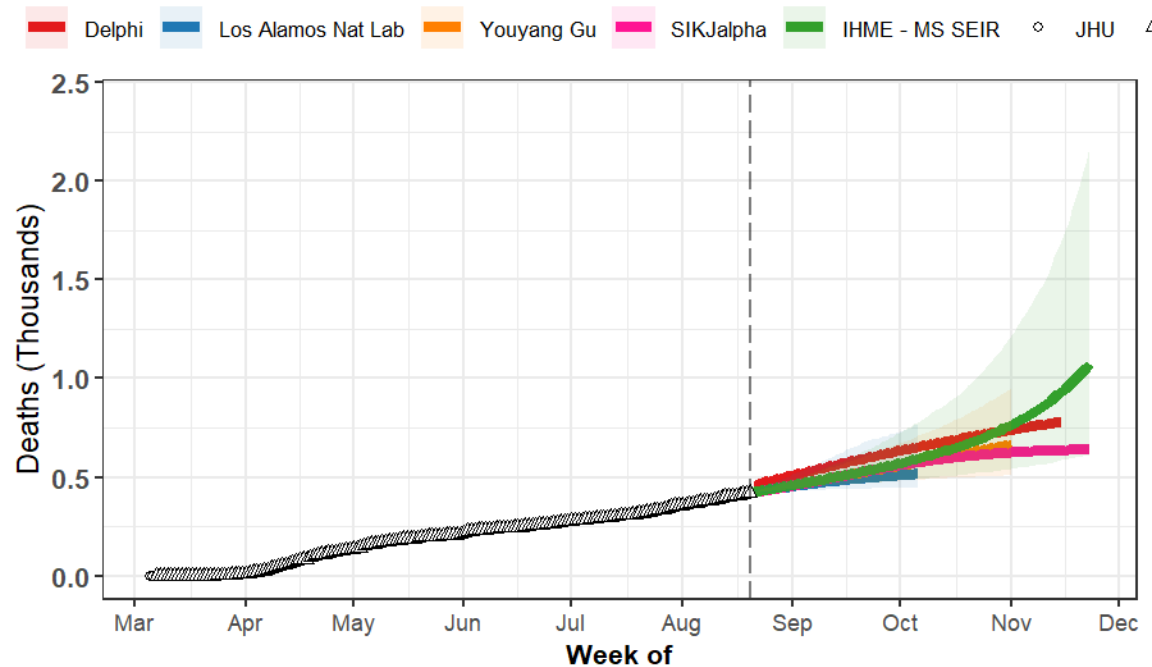

## Cumulative Out-Of-Sample Error (Post Intercept Shift)

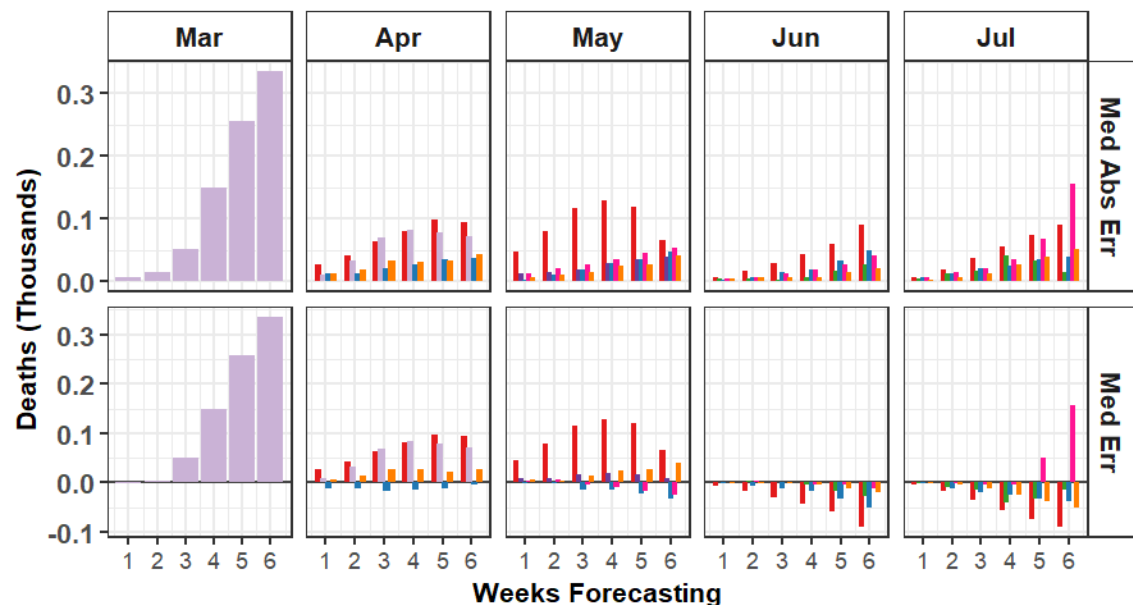

## All Model Versions

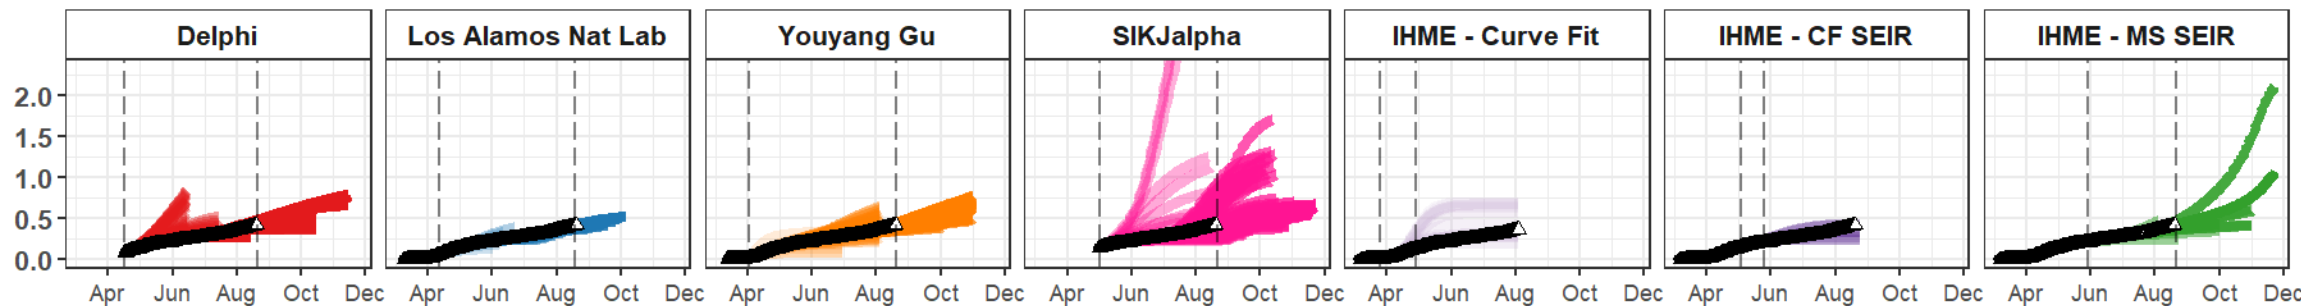

## All Cumulative Errors

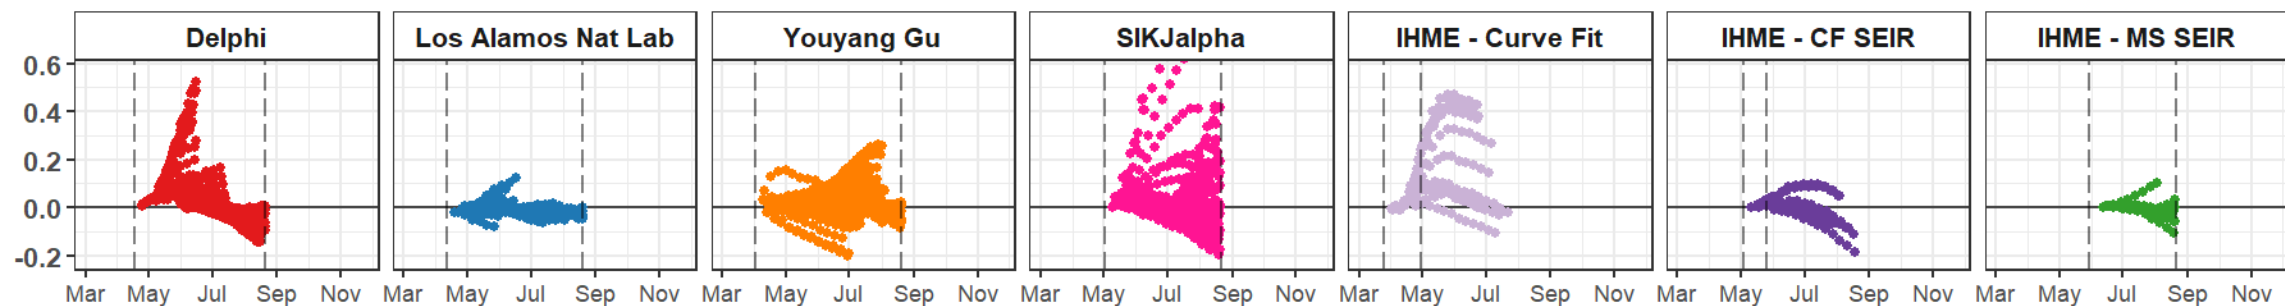



# Oregon

## Current Forecast

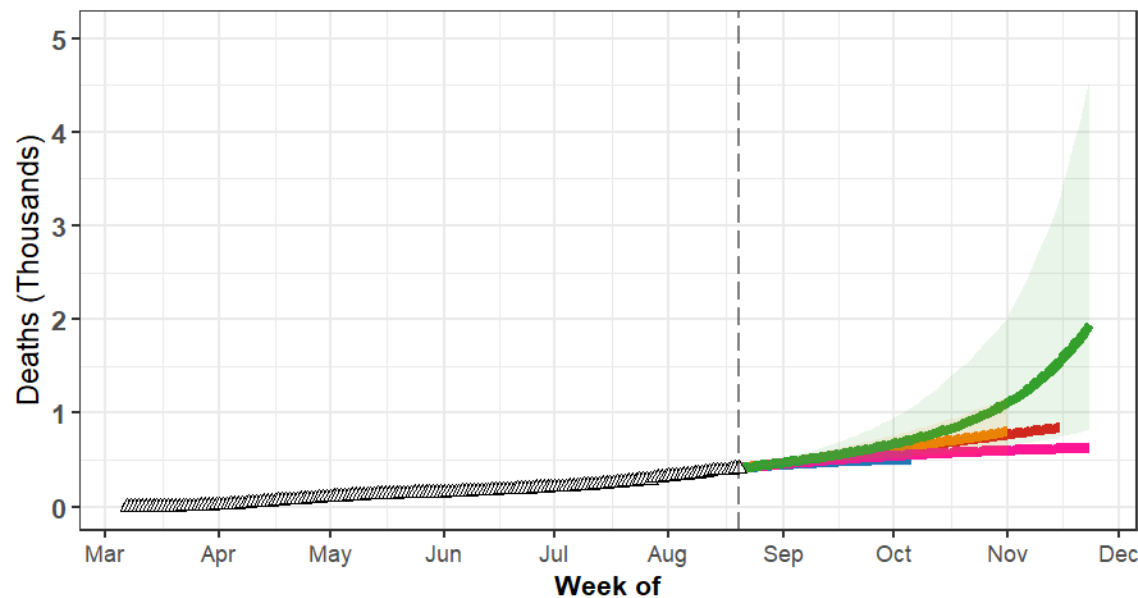

## Cumulative Out-Of-Sample Error (Post Intercept Shift)

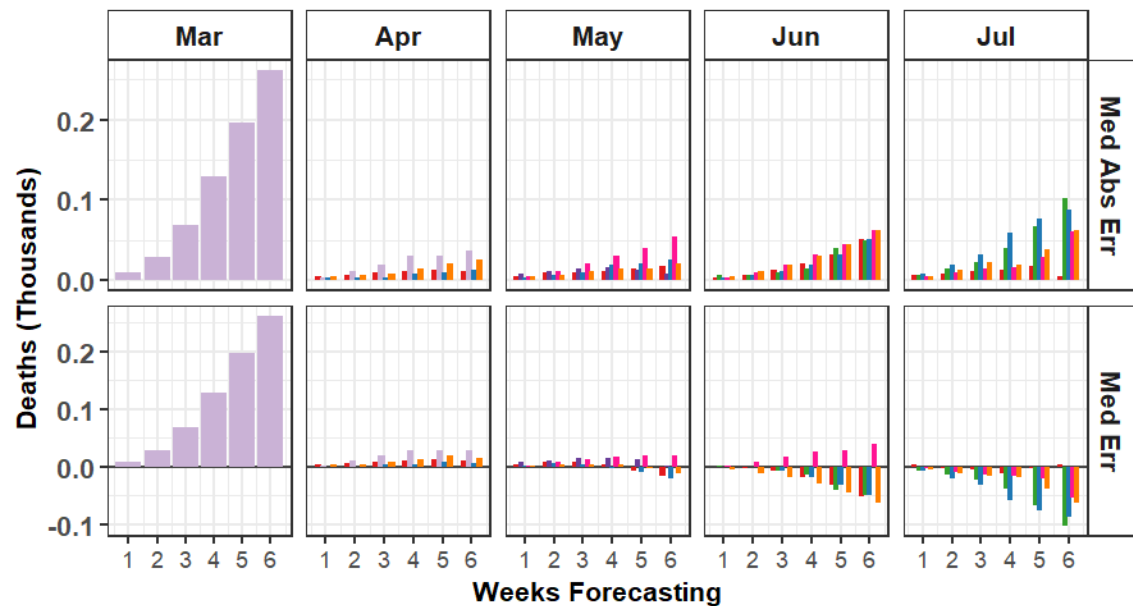

## All Model Versions

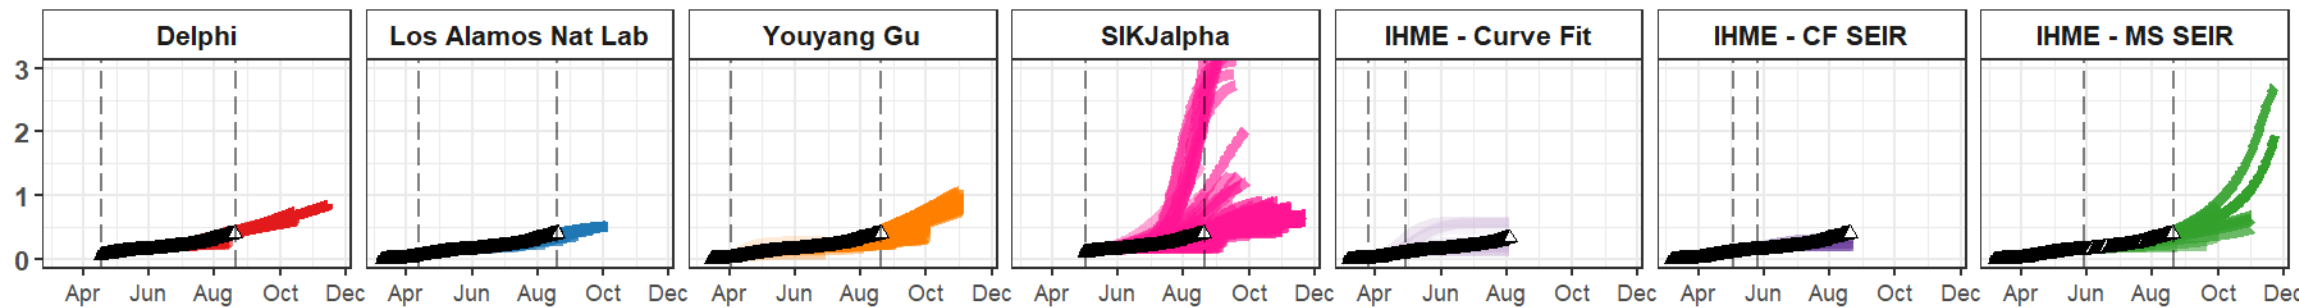

## All Cumulative Errors

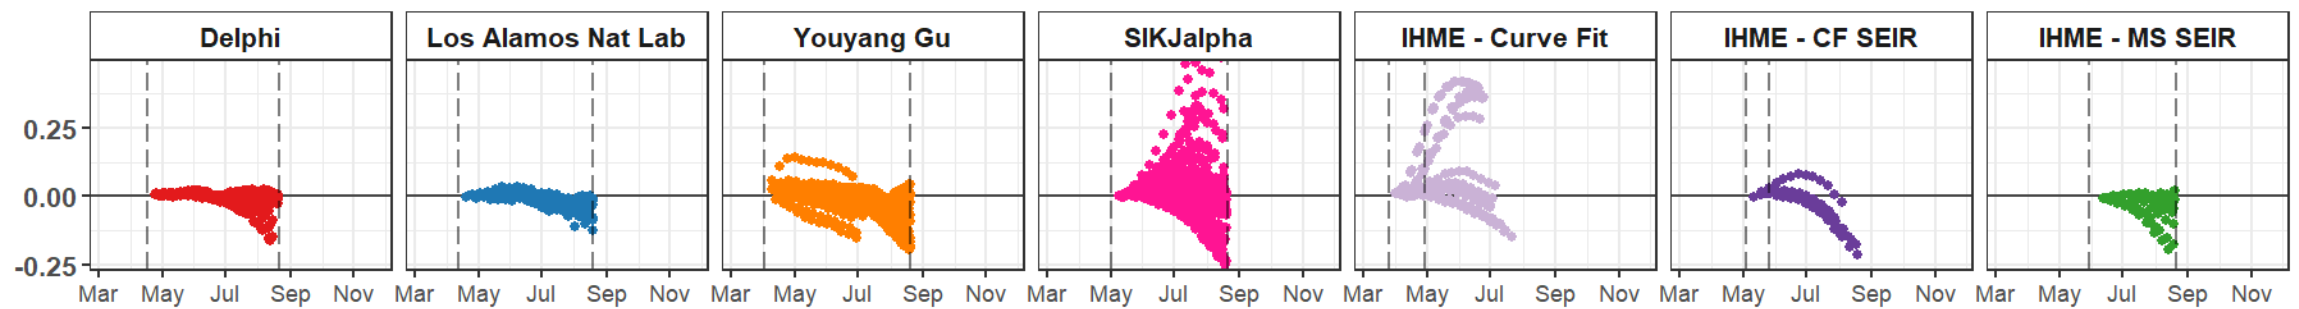

# Cameroon

## Current Forecast

Delphi Los Alamos Nat Lab Imperial SIKJalpha IHME - MS SEIR

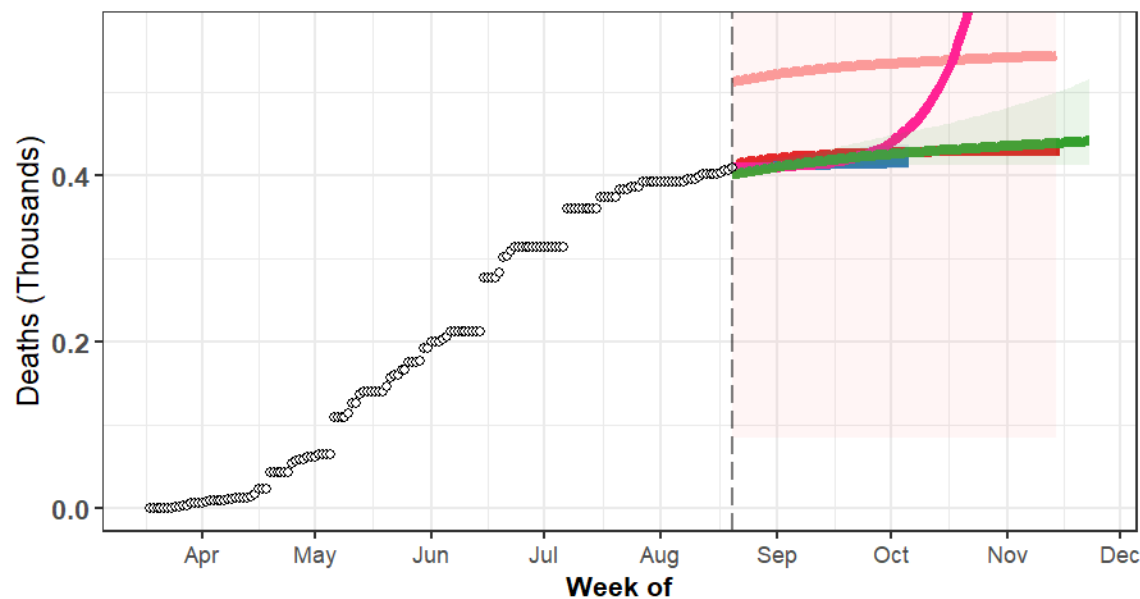

## Cumulative Out-Of-Sample Error (Post Intercept Shift)

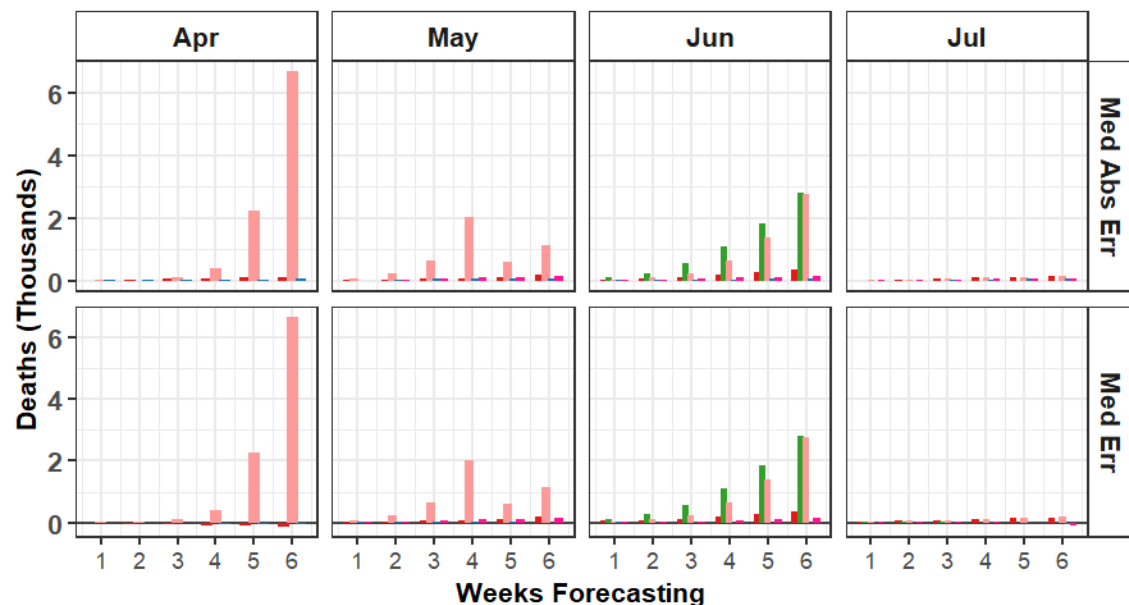

## All Model Versions

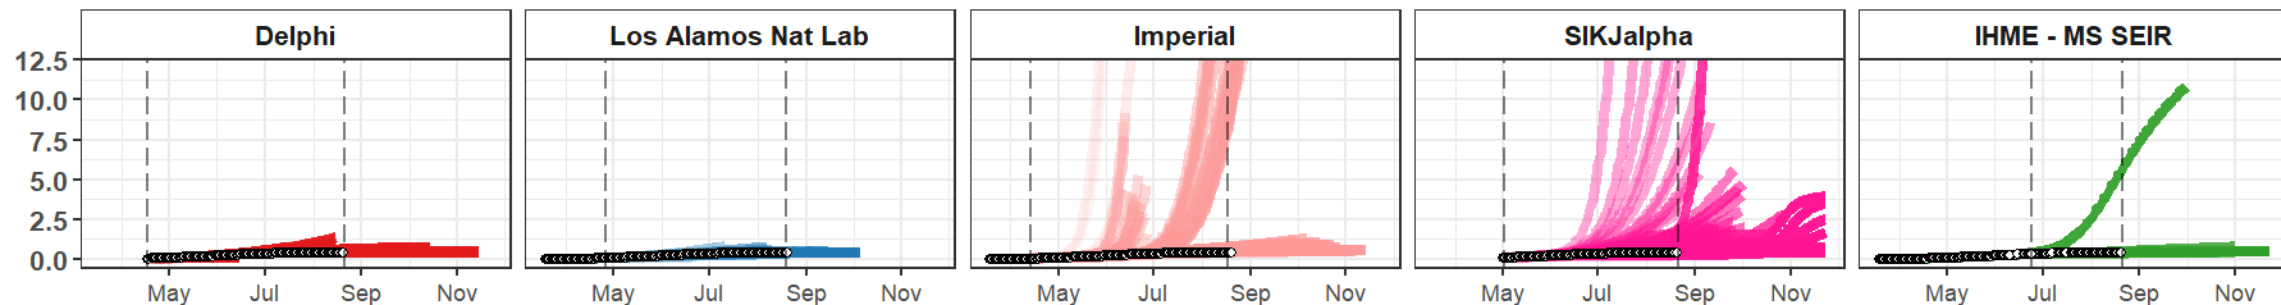

## All Cumulative Errors

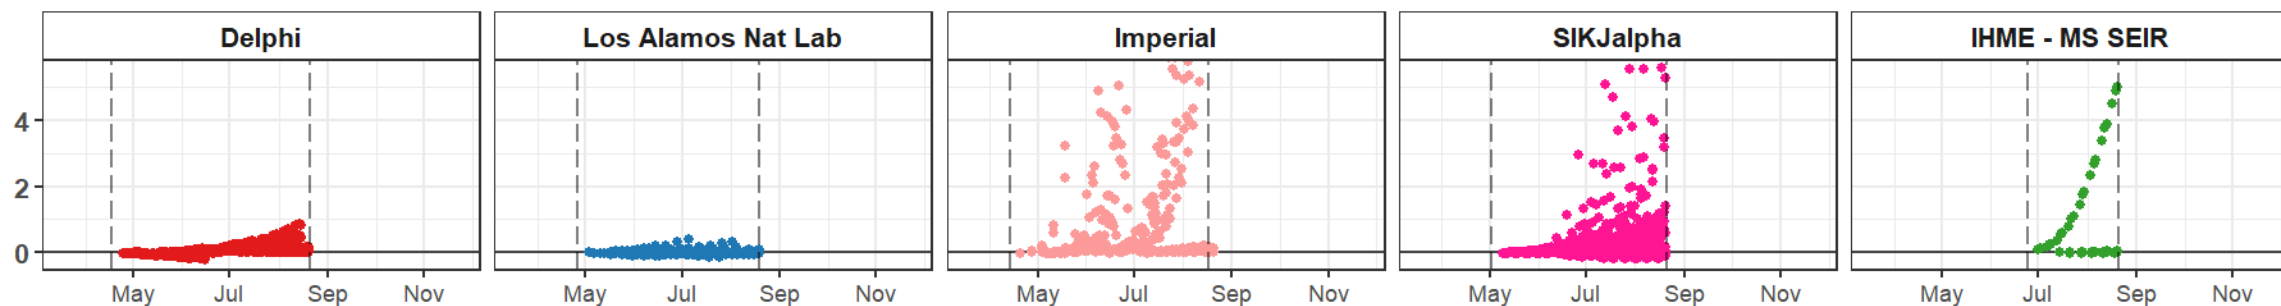

# Czech Republic

## Current Forecast

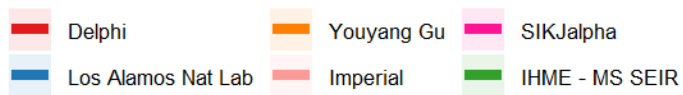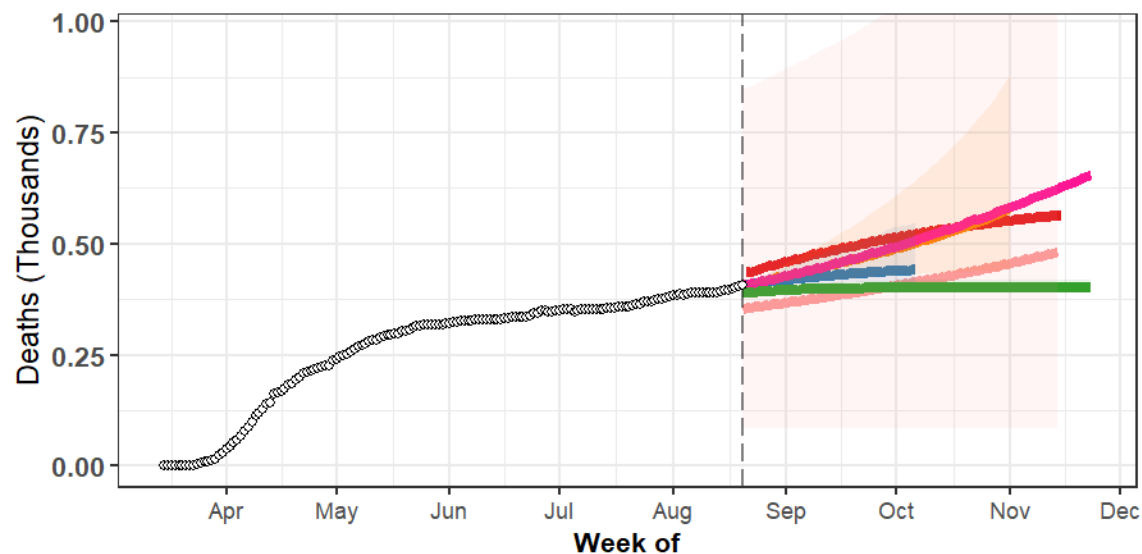

## Cumulative Out-Of-Sample Error (Post Intercept Shift)

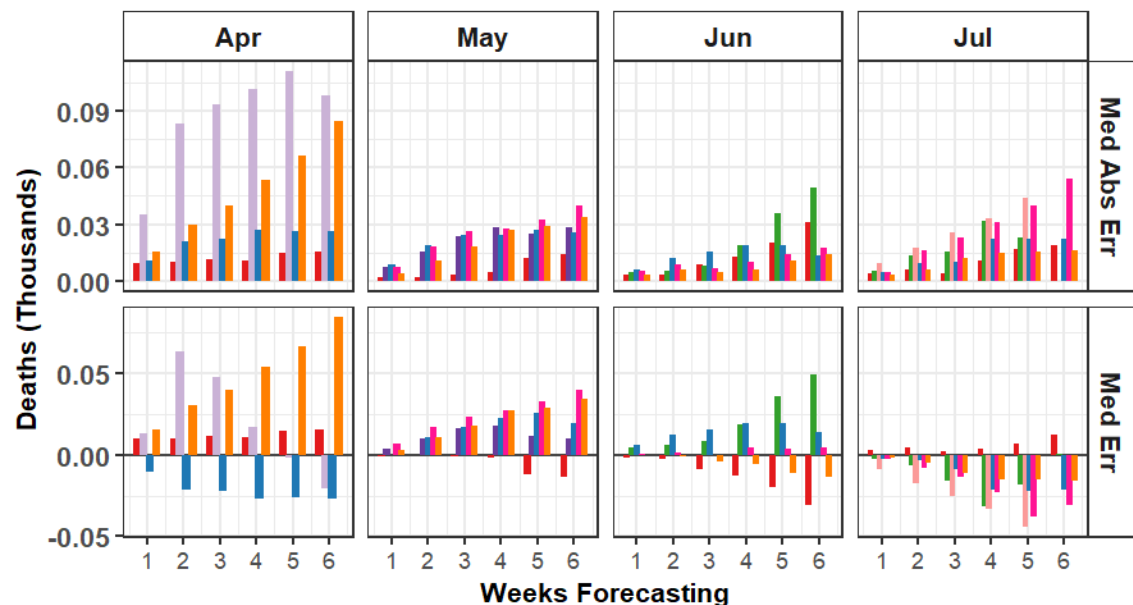

## All Model Versions

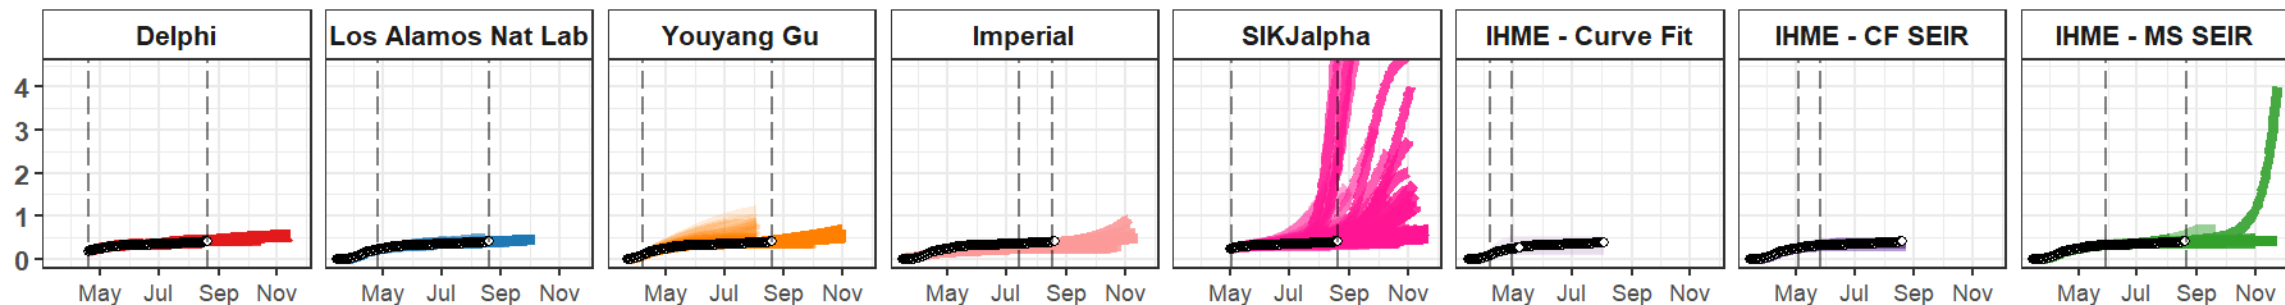

## All Cumulative Errors

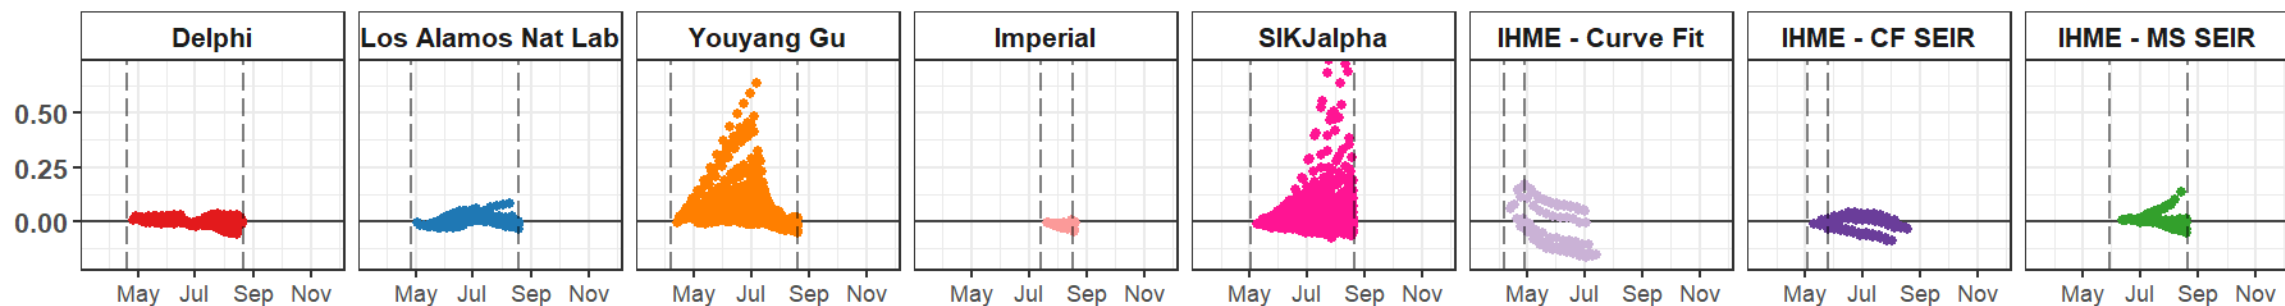

# Utah

## Current Forecast

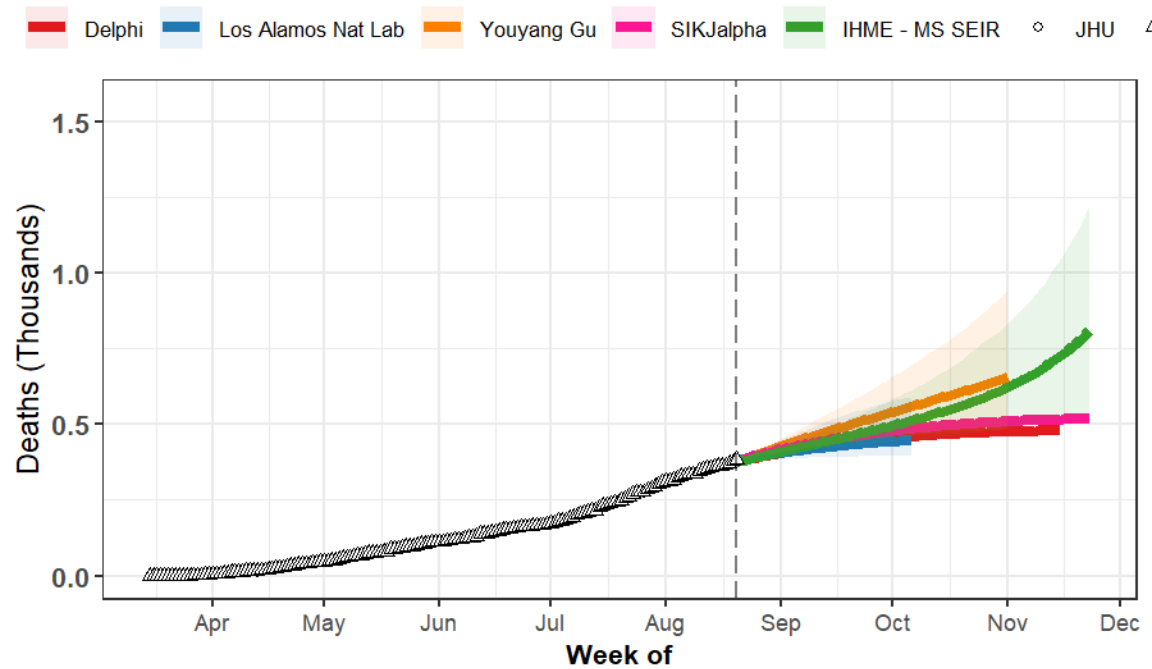

## Cumulative Out-Of-Sample Error (Post Intercept Shift)

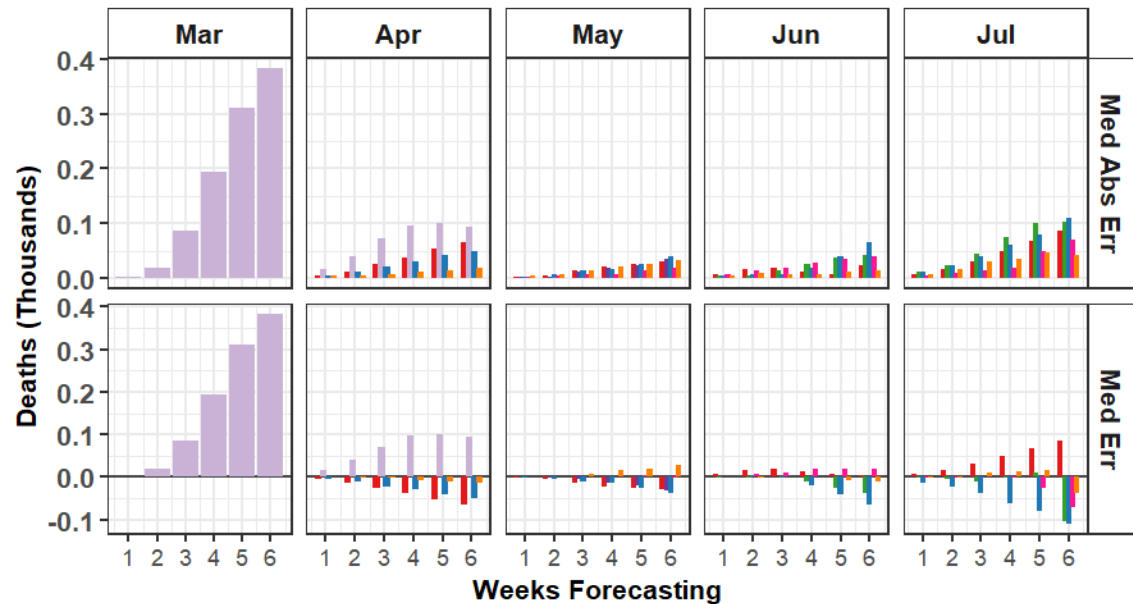

## All Model Versions

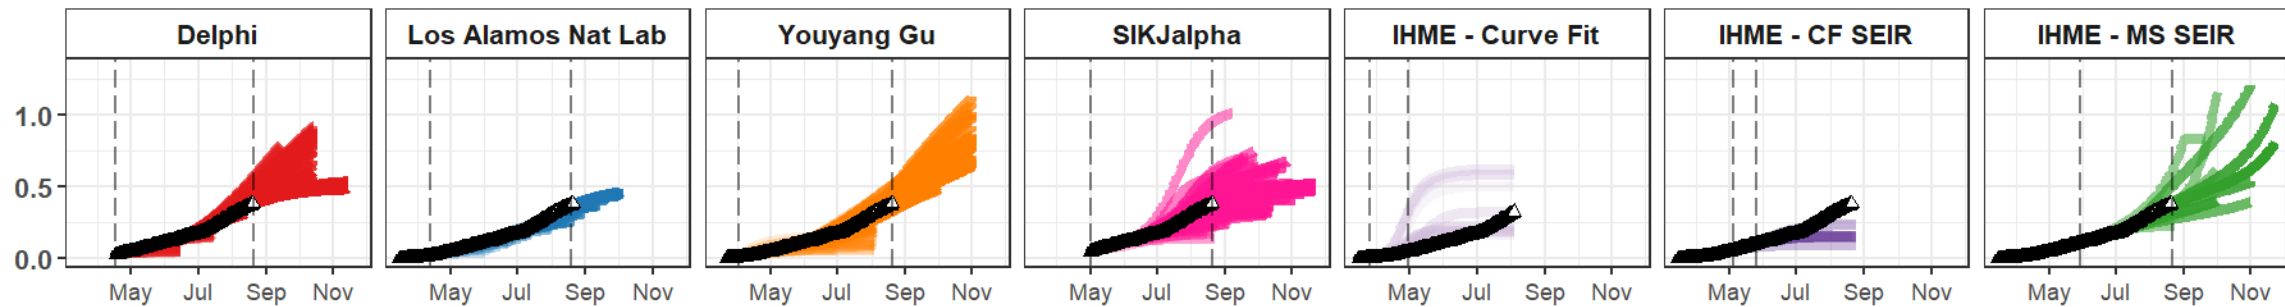

## All Cumulative Errors

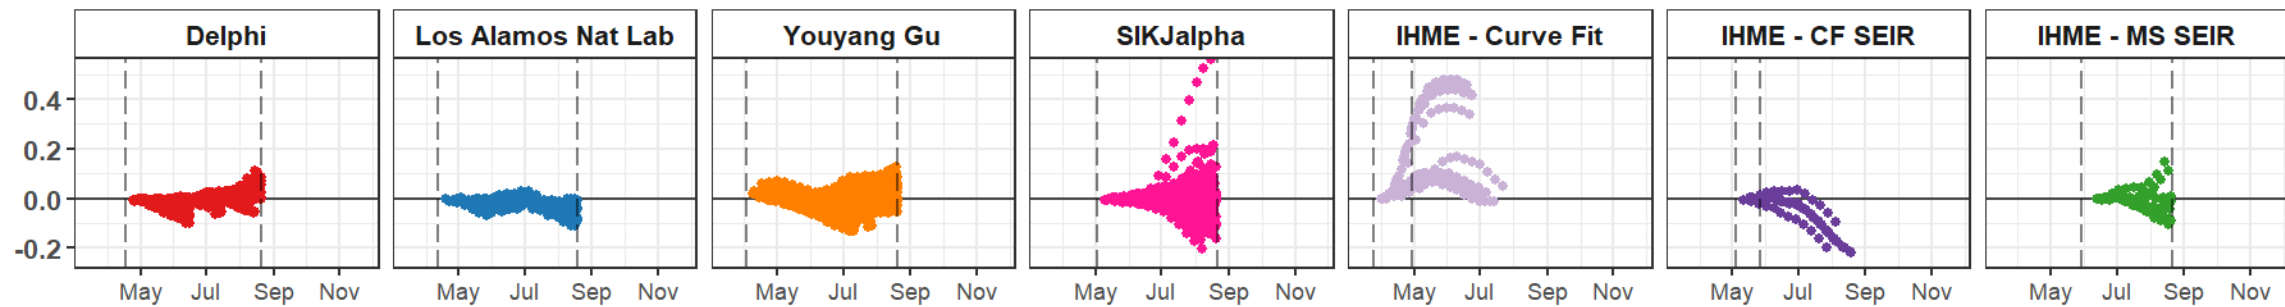

# Nebraska

## Current Forecast

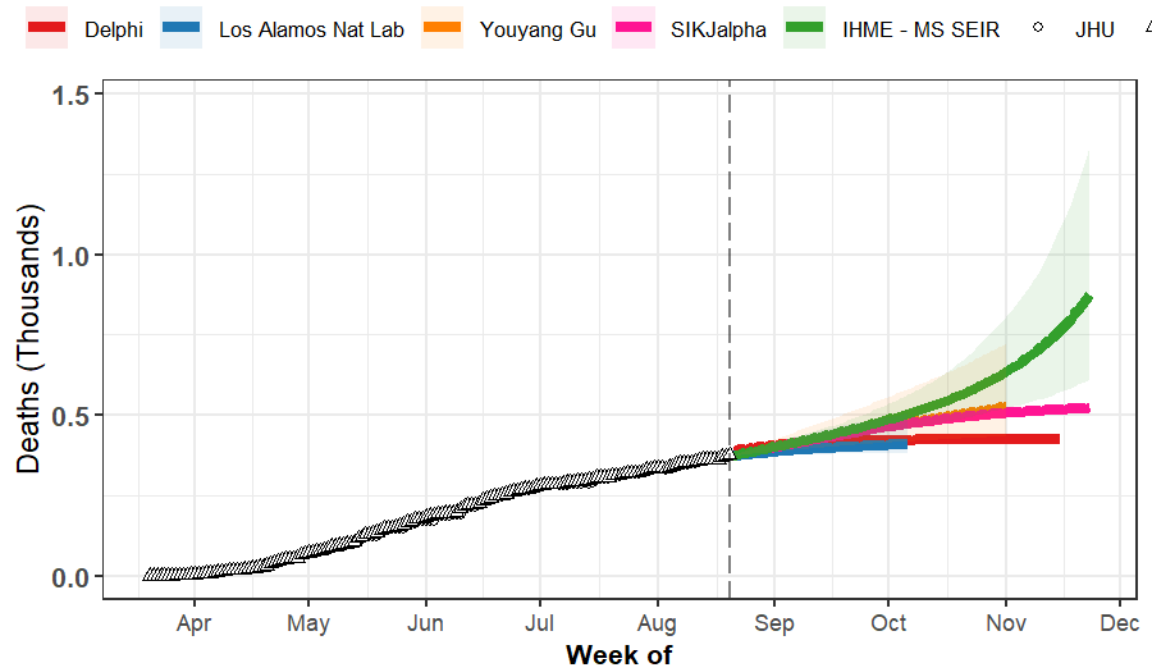

## Cumulative Out-Of-Sample Error (Post Intercept Shift)

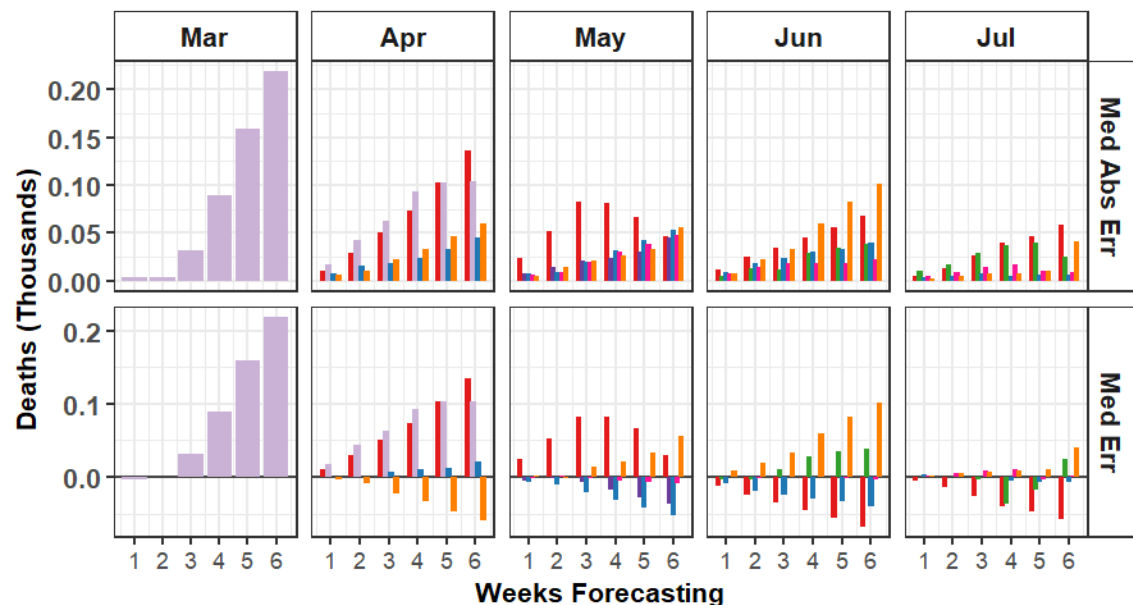

## All Model Versions

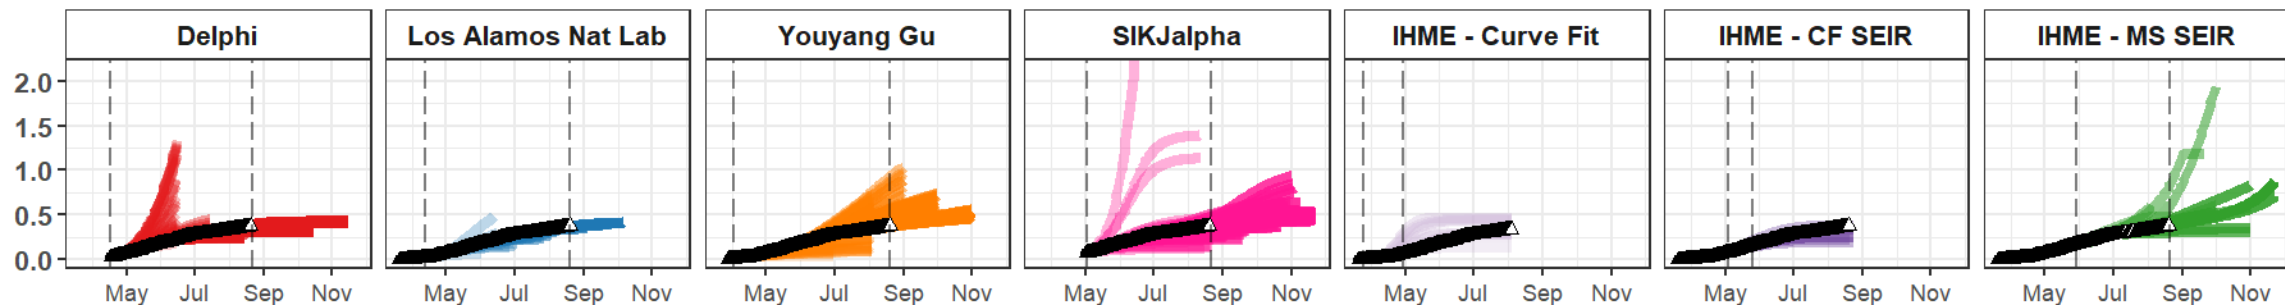

## All Cumulative Errors

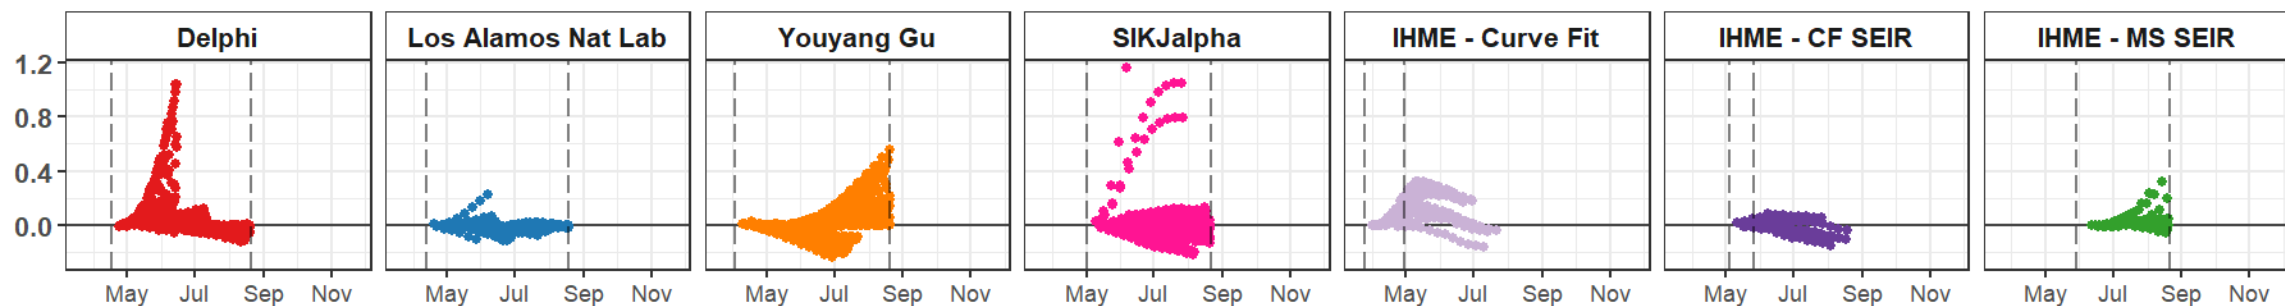

# United Arab Emirates

## Current Forecast

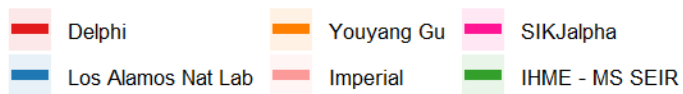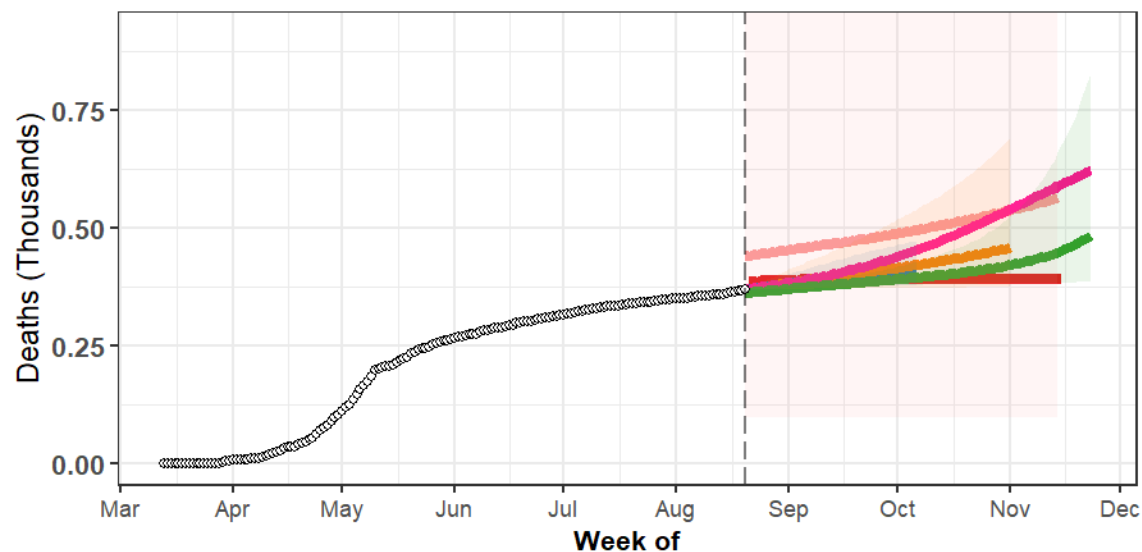

## Cumulative Out-Of-Sample Error (Post Intercept Shift)

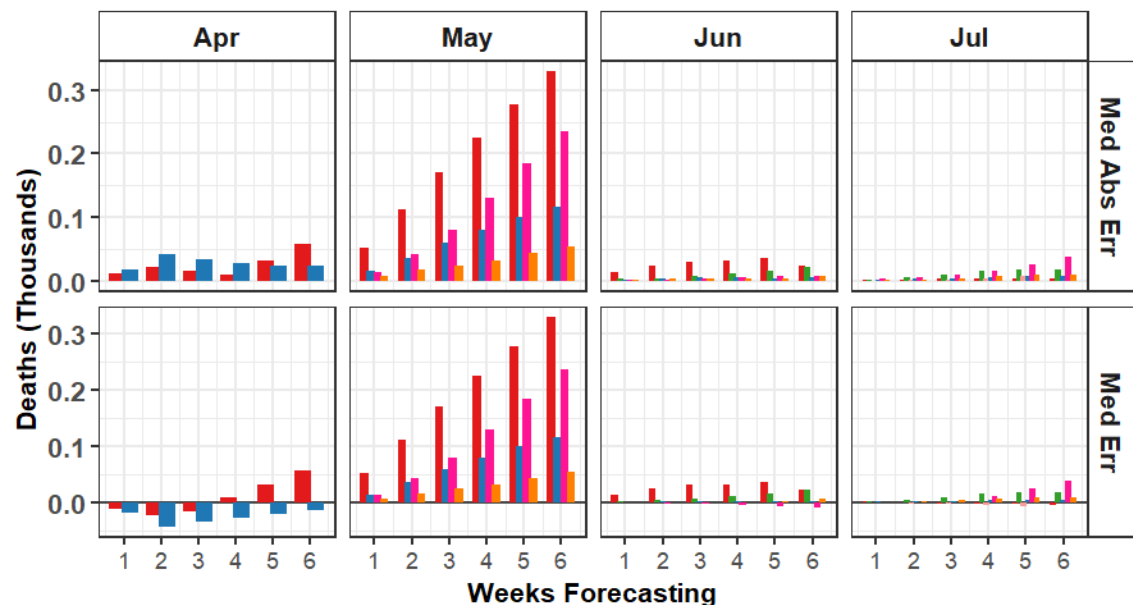

## All Model Versions

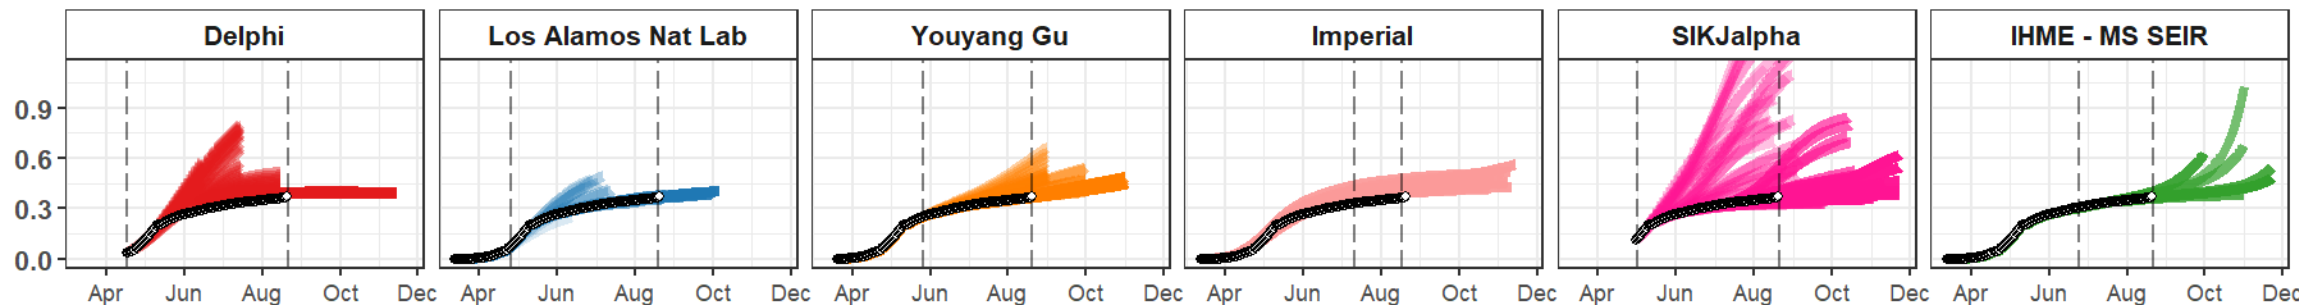

## All Cumulative Errors

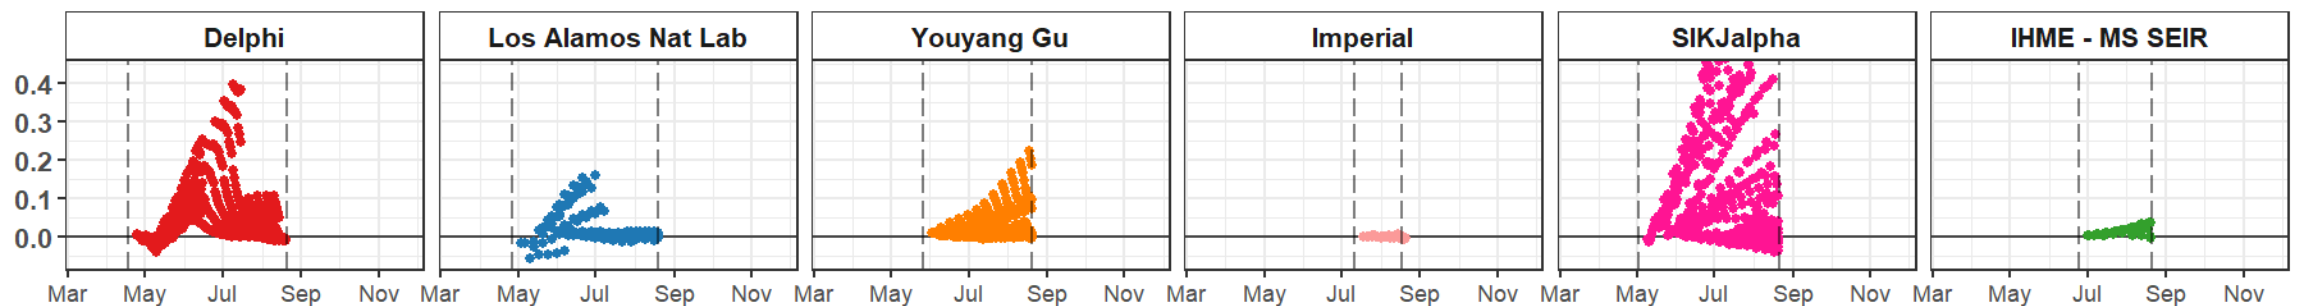

# Puerto Rico

## Current Forecast

Los Alamos Nat Lab   Youyang Gu   SIKJalpha   IHME - MS SEIR

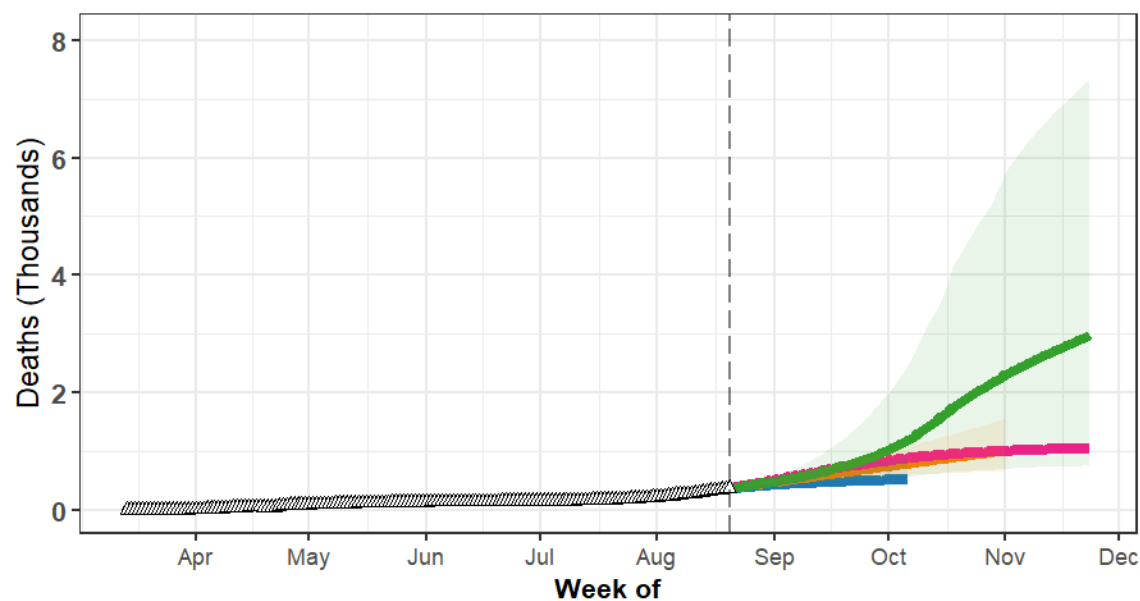

## Cumulative Out-Of-Sample Error (Post Intercept Shift)

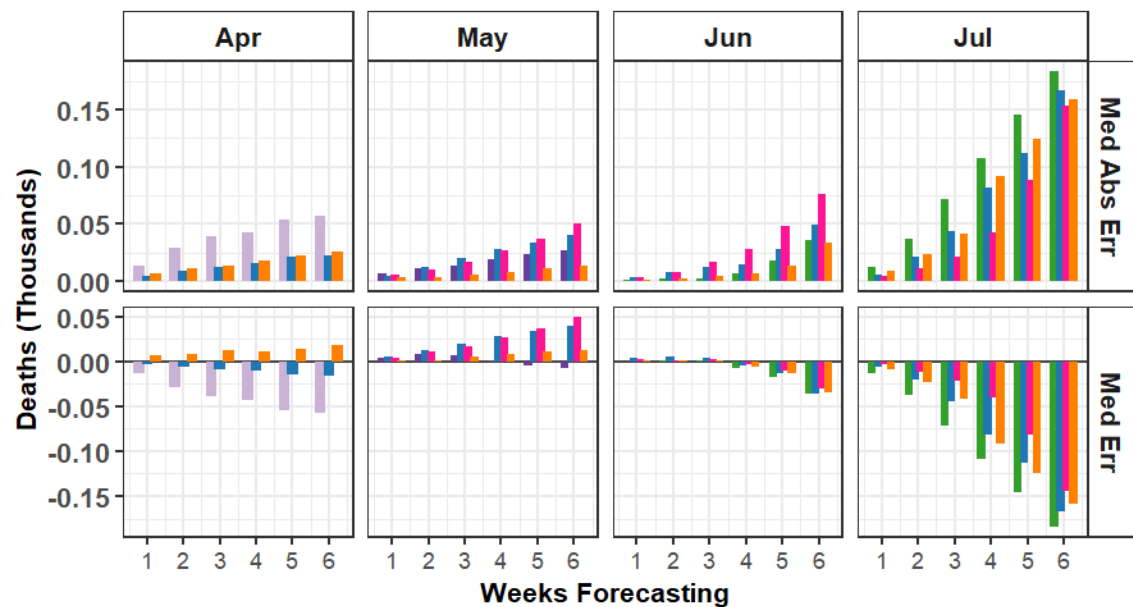

## All Model Versions

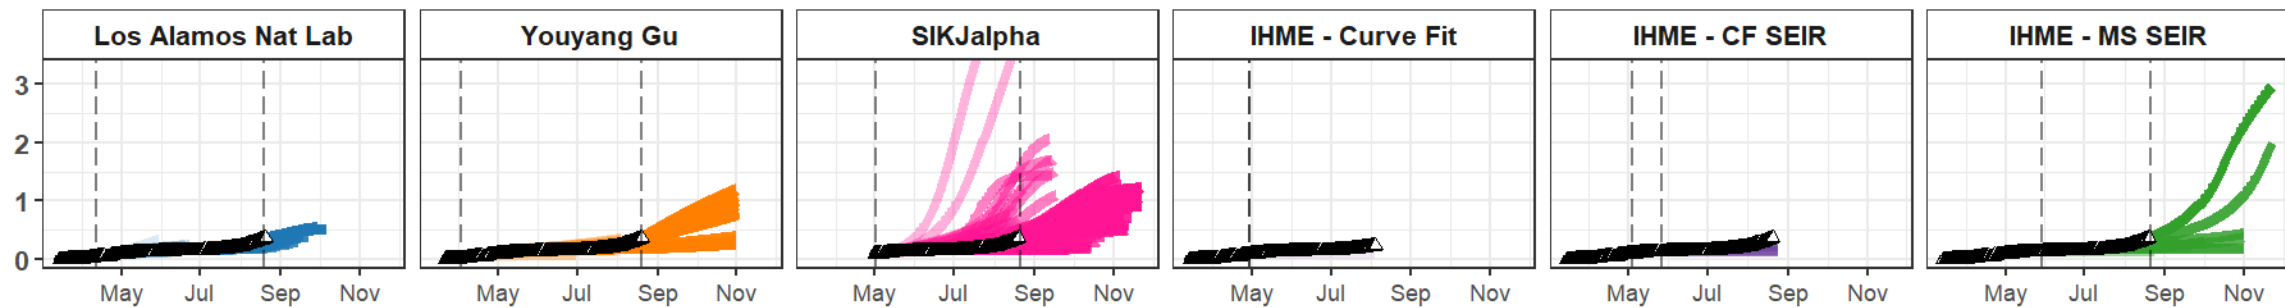

## All Cumulative Errors

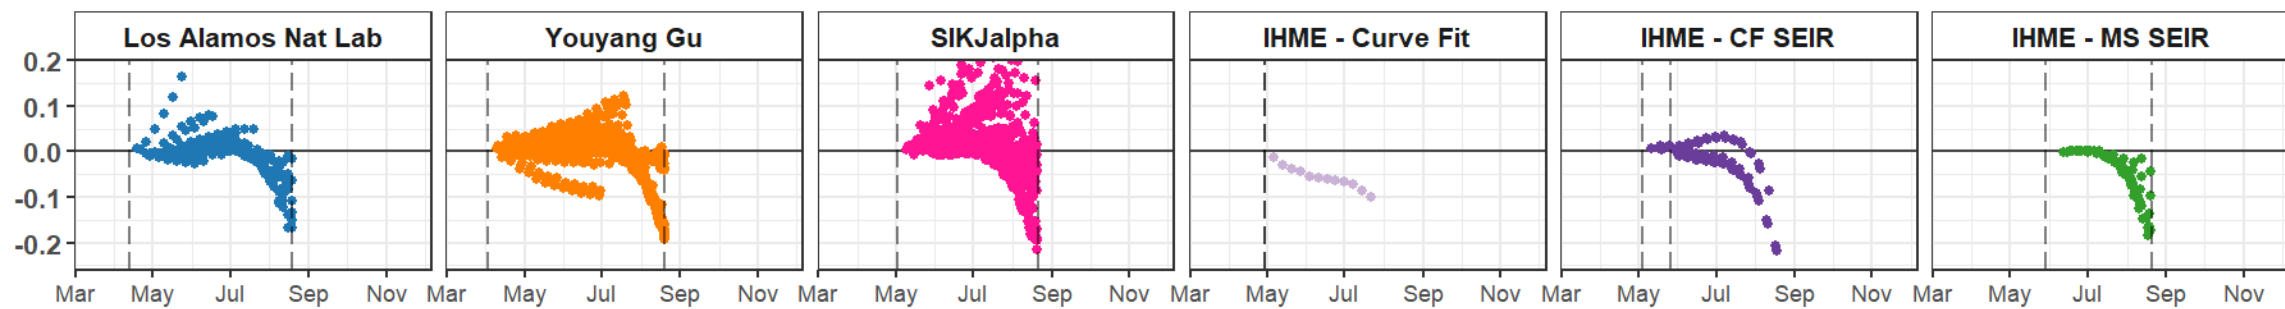

# Finland

## Current Forecast

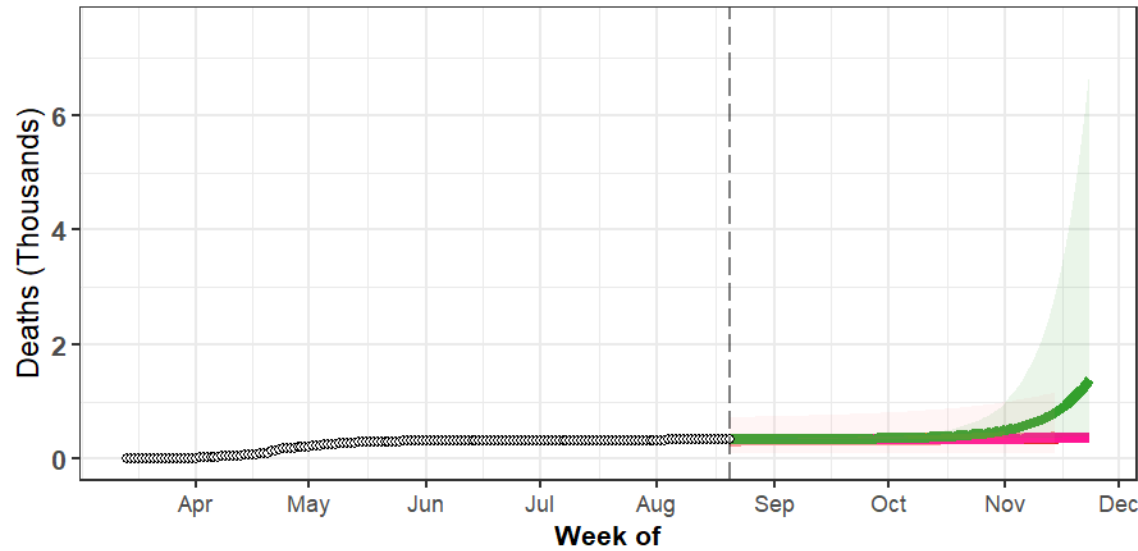

## Cumulative Out-Of-Sample Error (Post Intercept Shift)

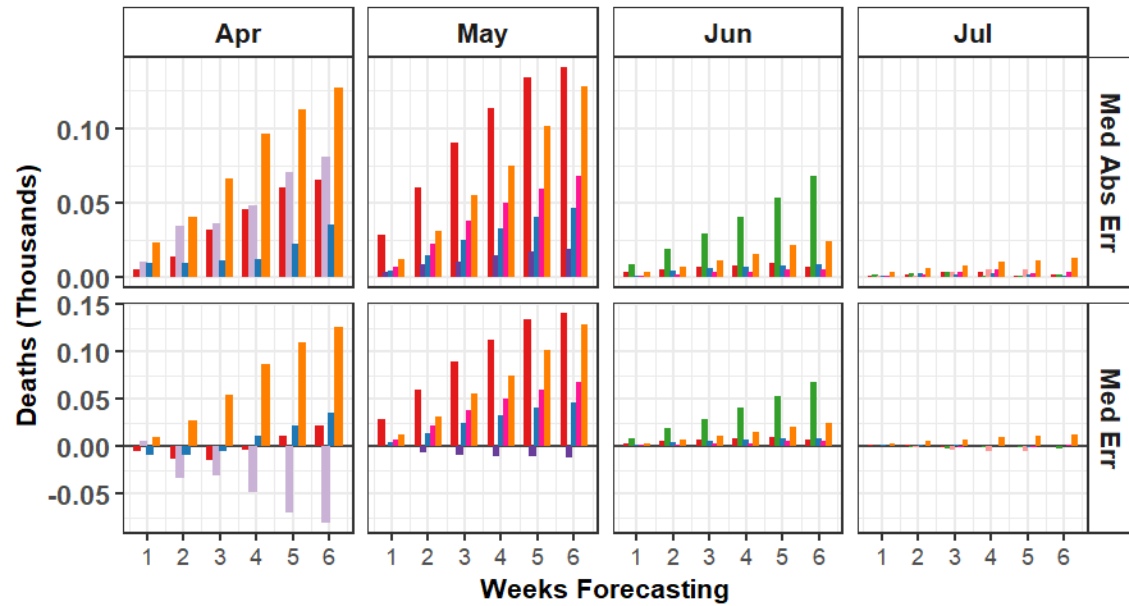

## All Model Versions

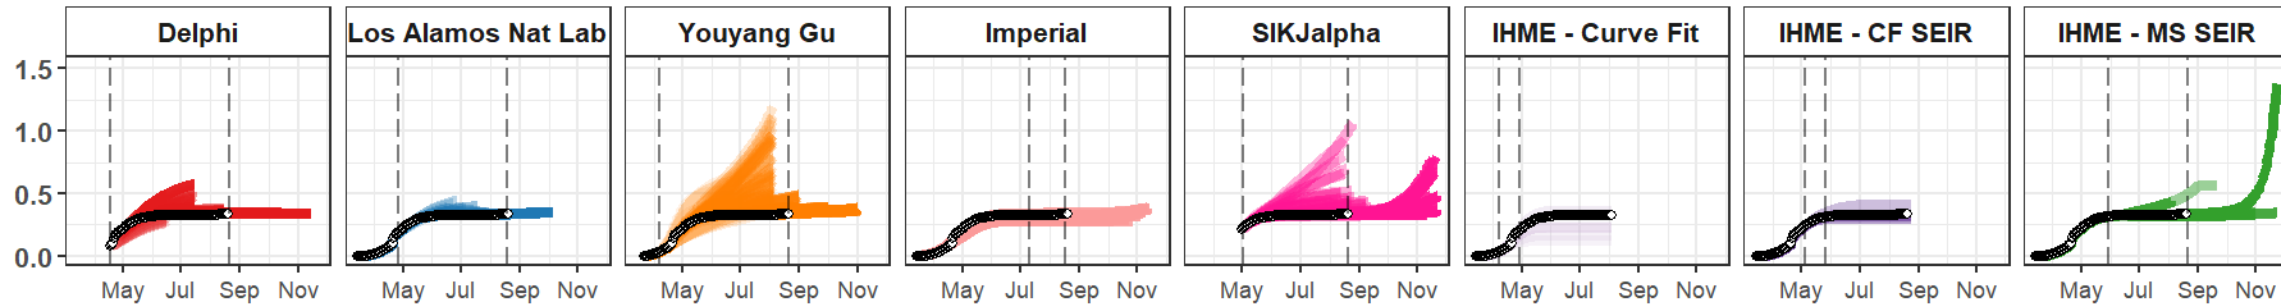

## All Cumulative Errors

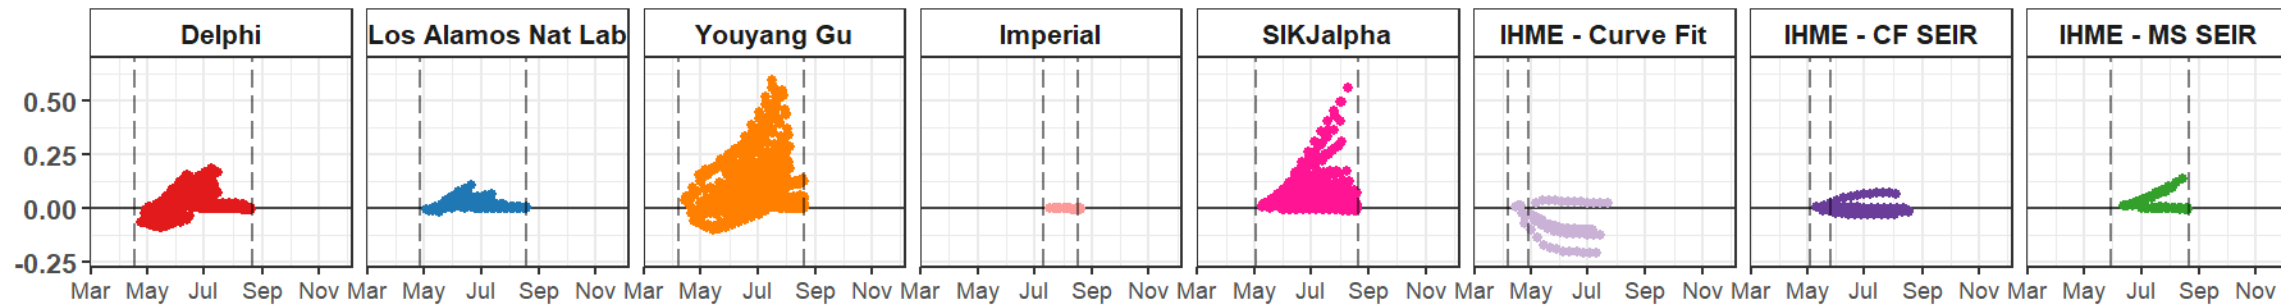



# Costa Rica

## Current Forecast

Delphi Los Alamos Nat Lab Imperial SIKJalpha IHME - MS SEIR

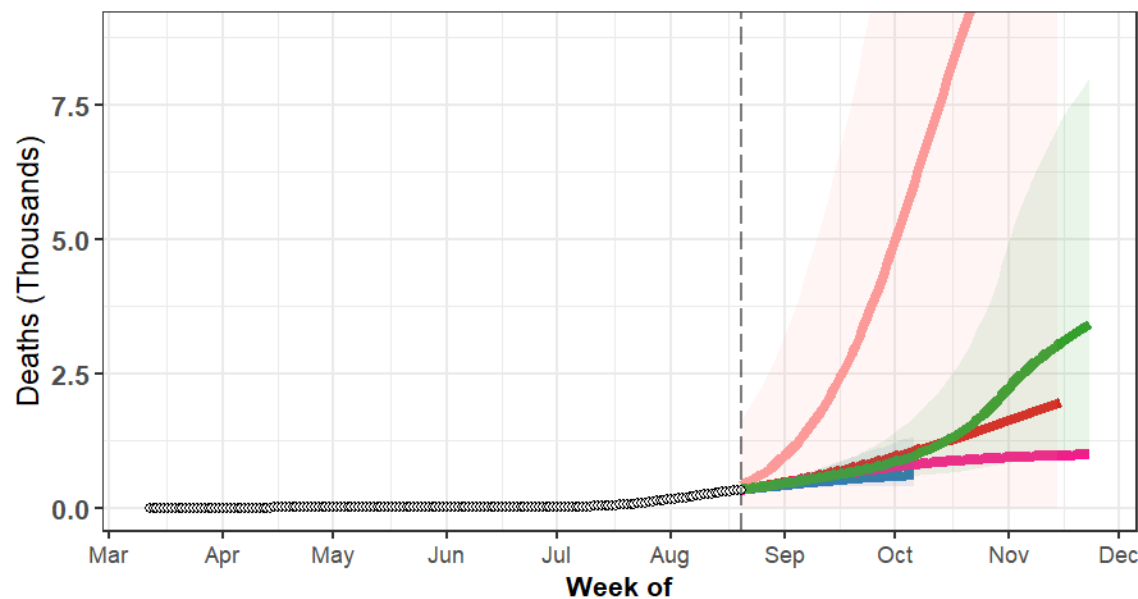

## Cumulative Out-Of-Sample Error (Post Intercept Shift)

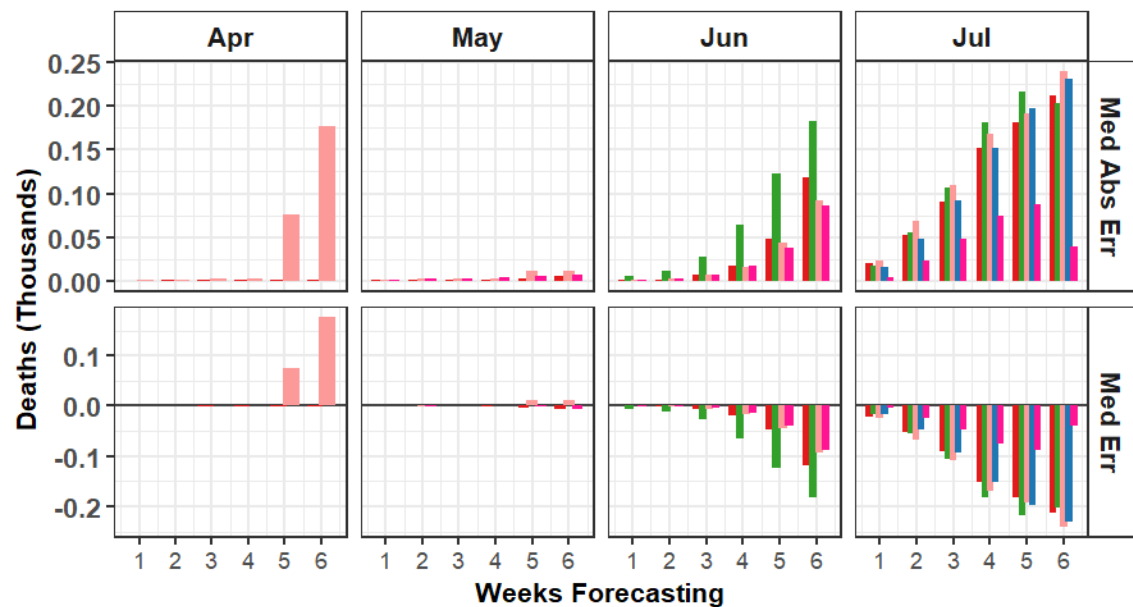

## All Model Versions

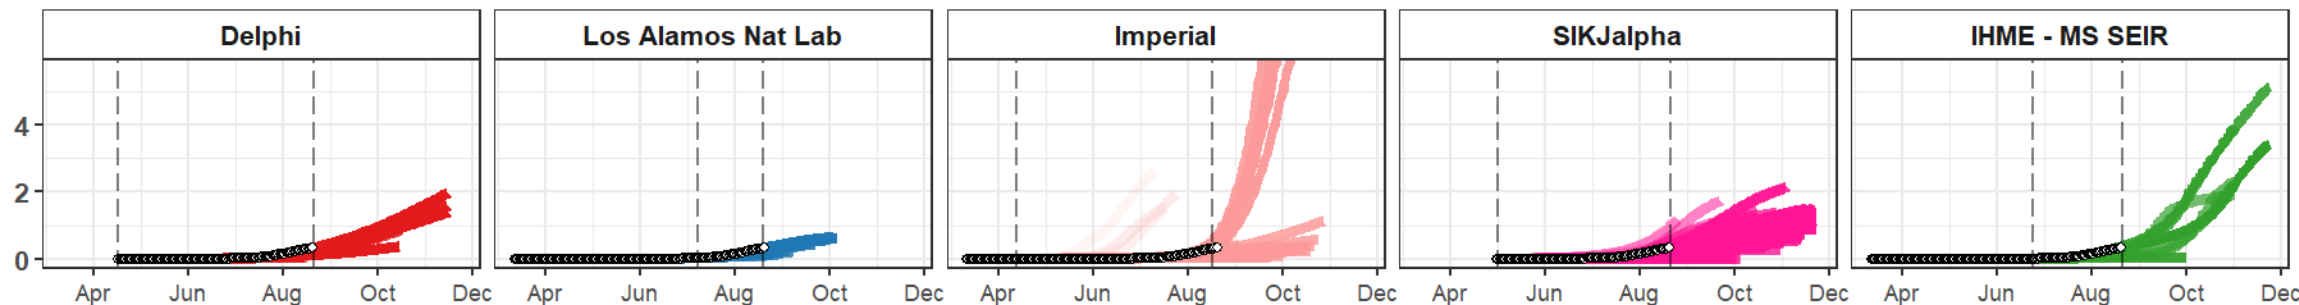

## All Cumulative Errors

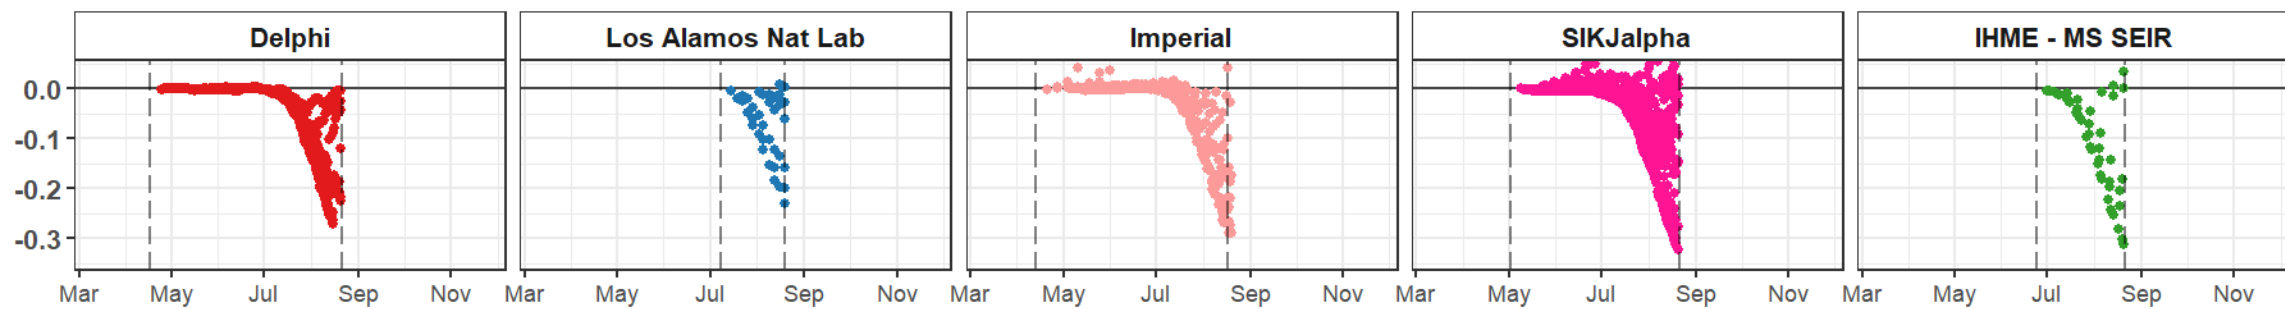

# Venezuela

## Current Forecast

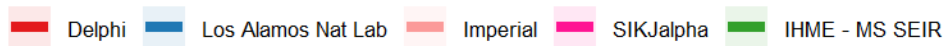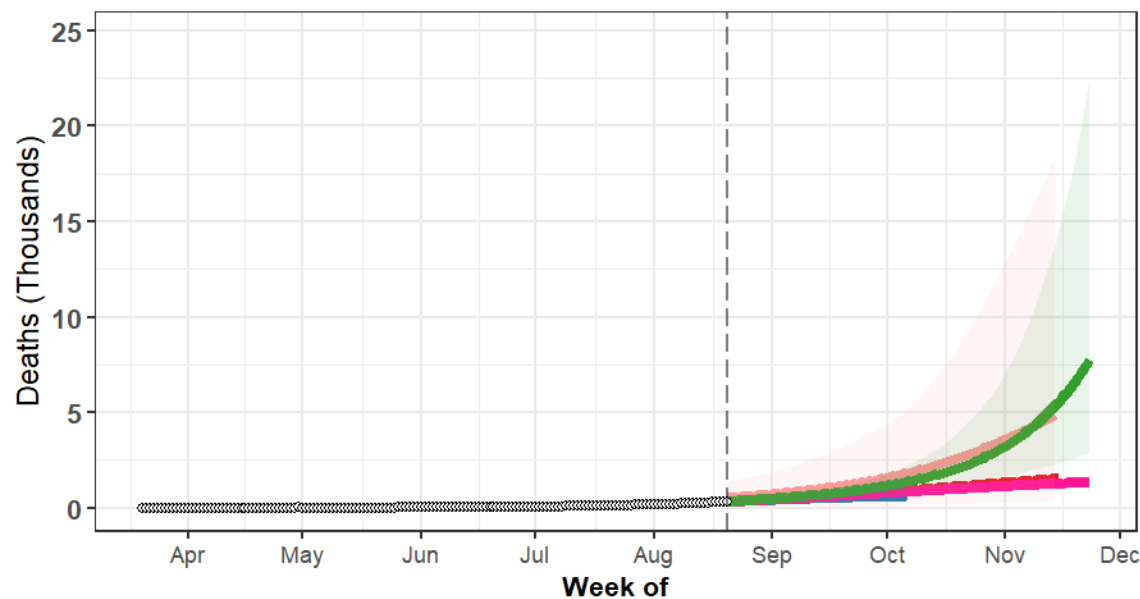

## Cumulative Out-Of-Sample Error (Post Intercept Shift)

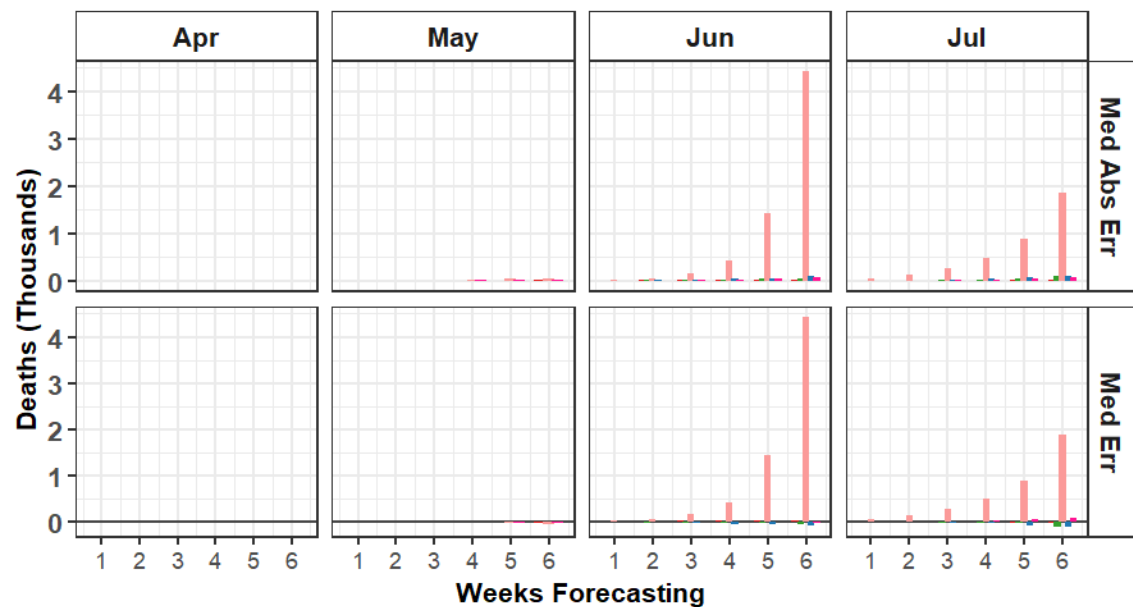

## All Model Versions

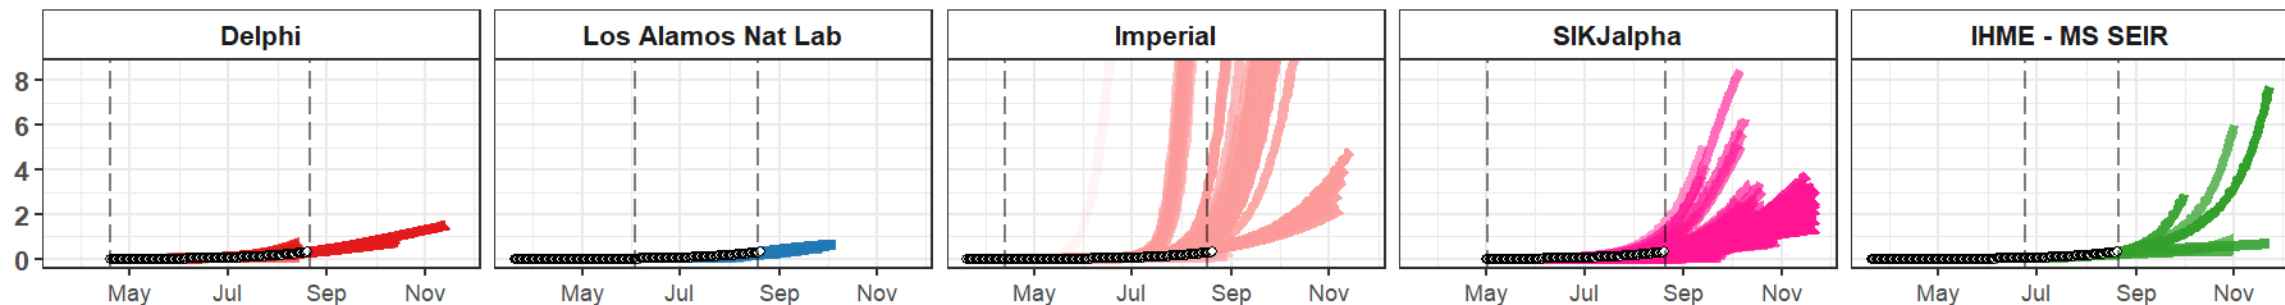

## All Cumulative Errors

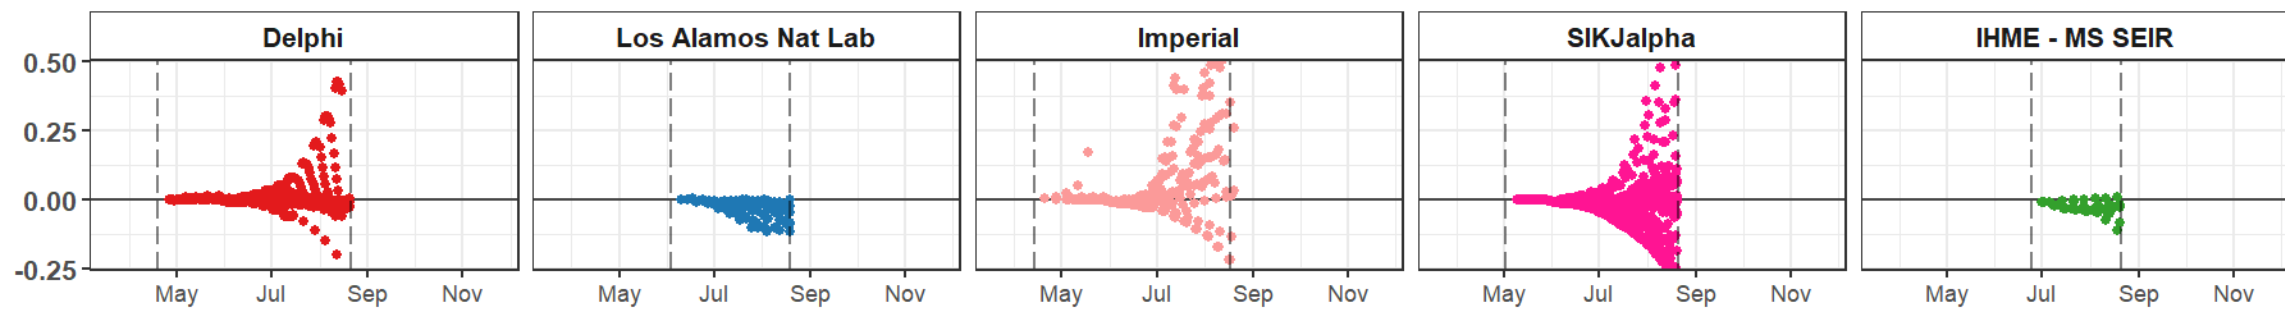

# South Korea

## Current Forecast

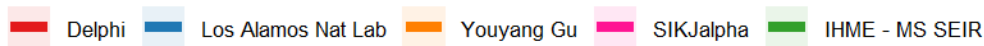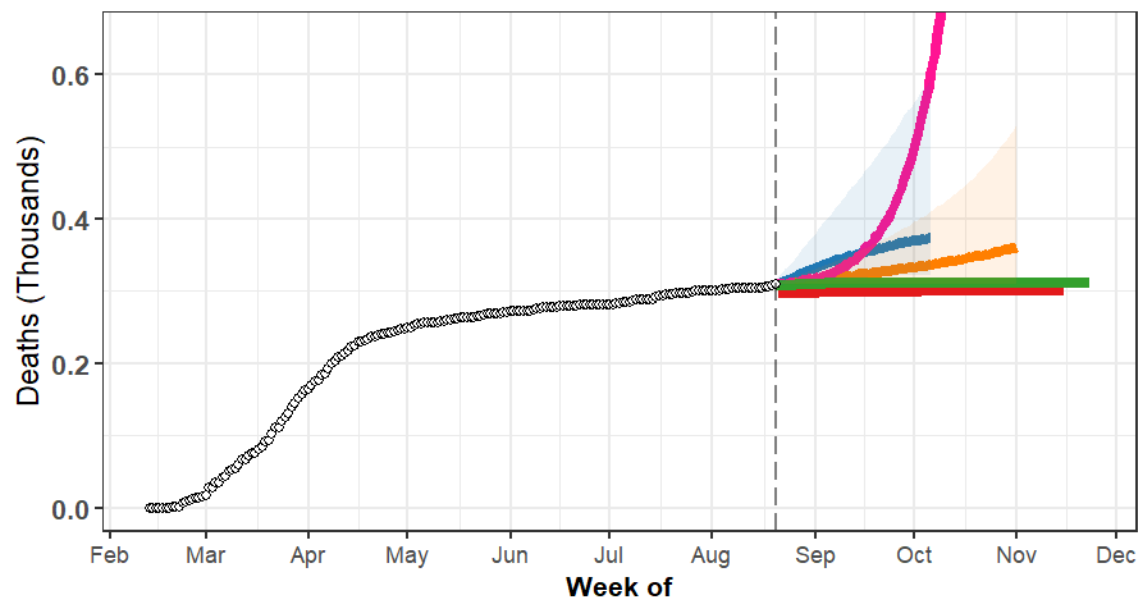

## Cumulative Out-Of-Sample Error (Post Intercept Shift)

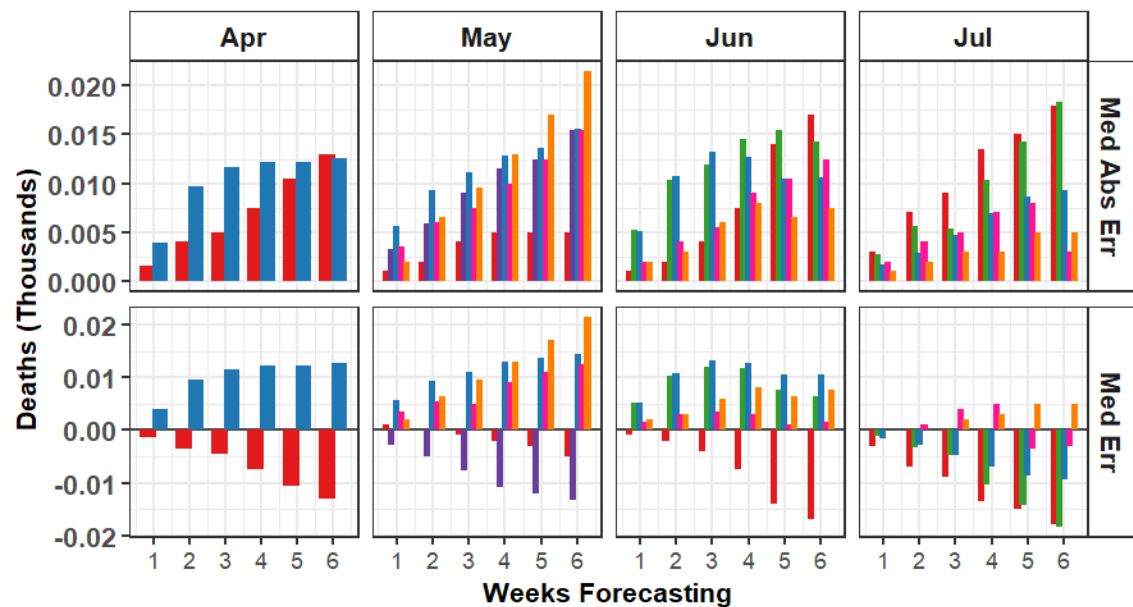

## All Model Versions

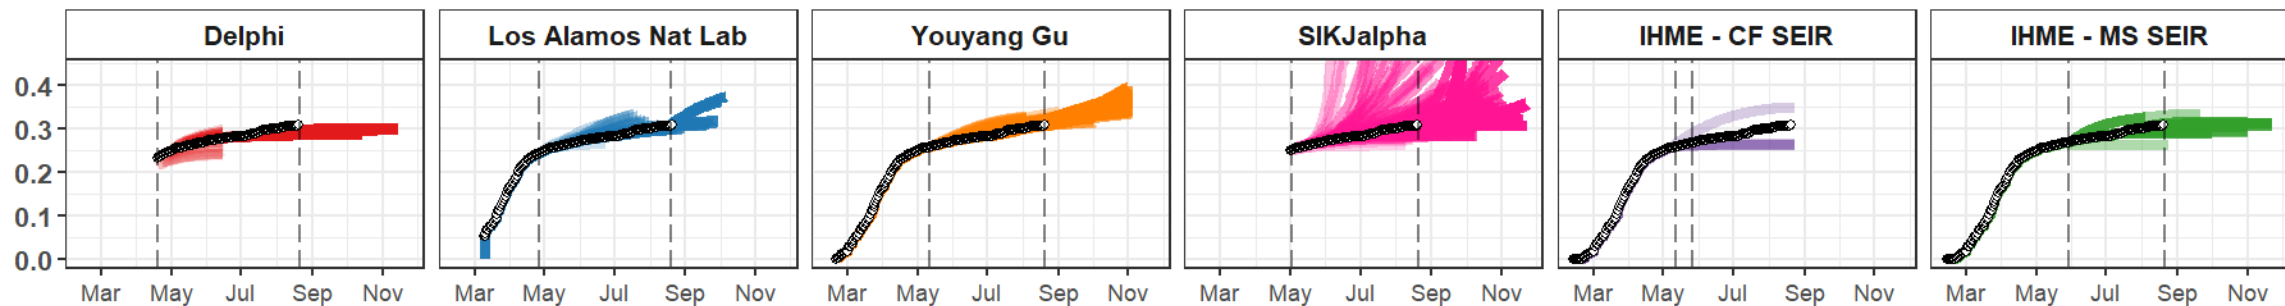

## All Cumulative Errors

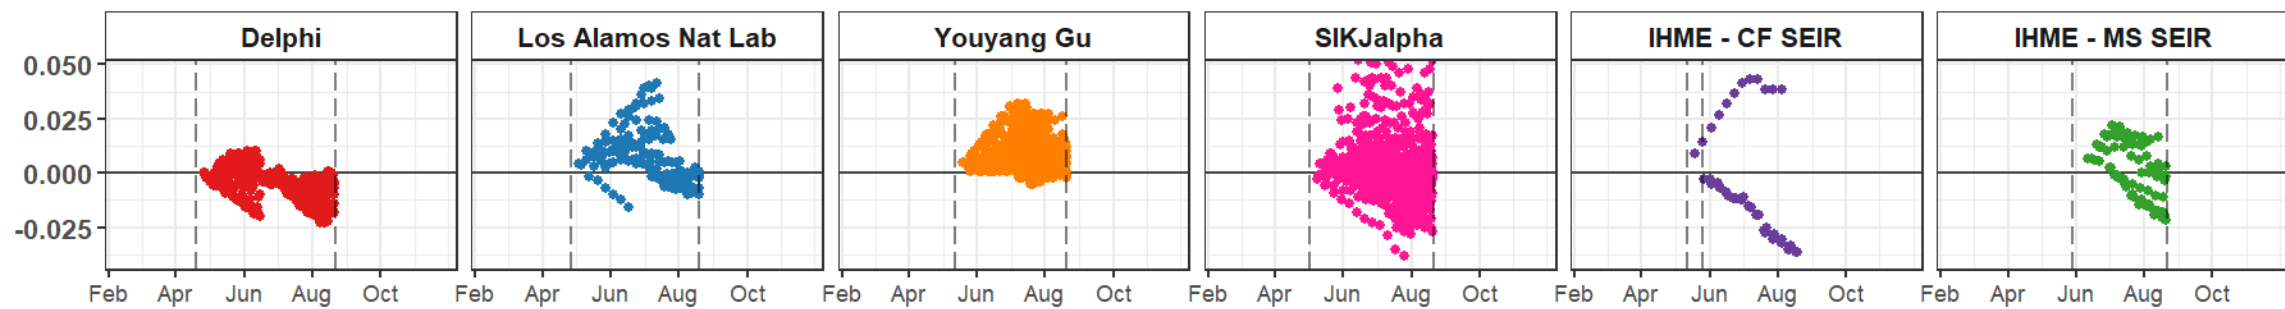

# Idaho

## Current Forecast

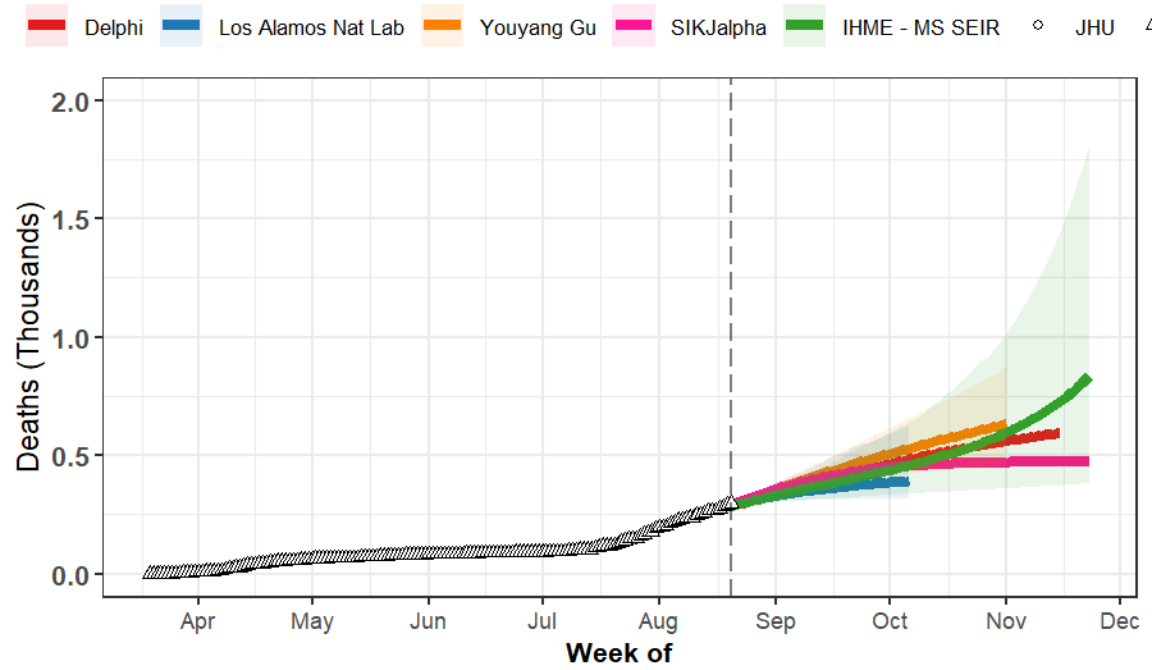

## Cumulative Out-Of-Sample Error (Post Intercept Shift)

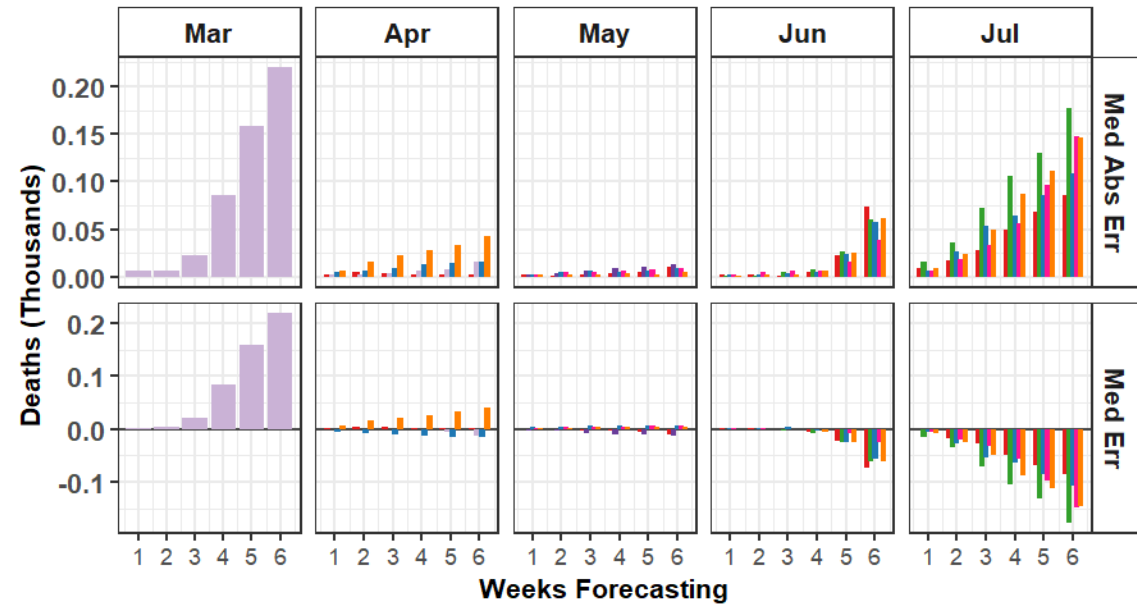

## All Model Versions

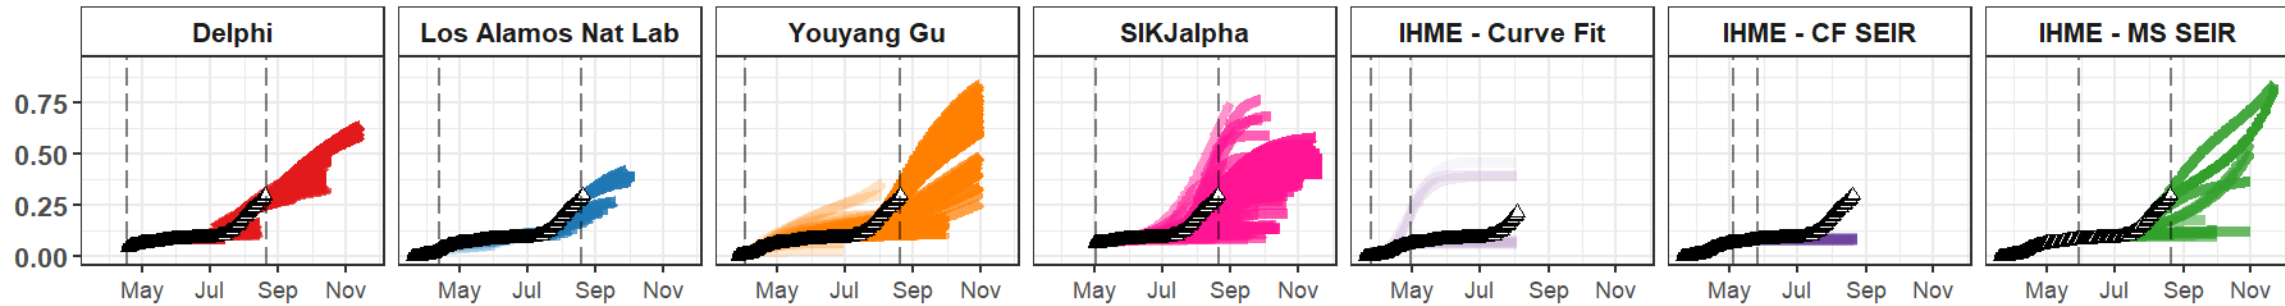

## All Cumulative Errors

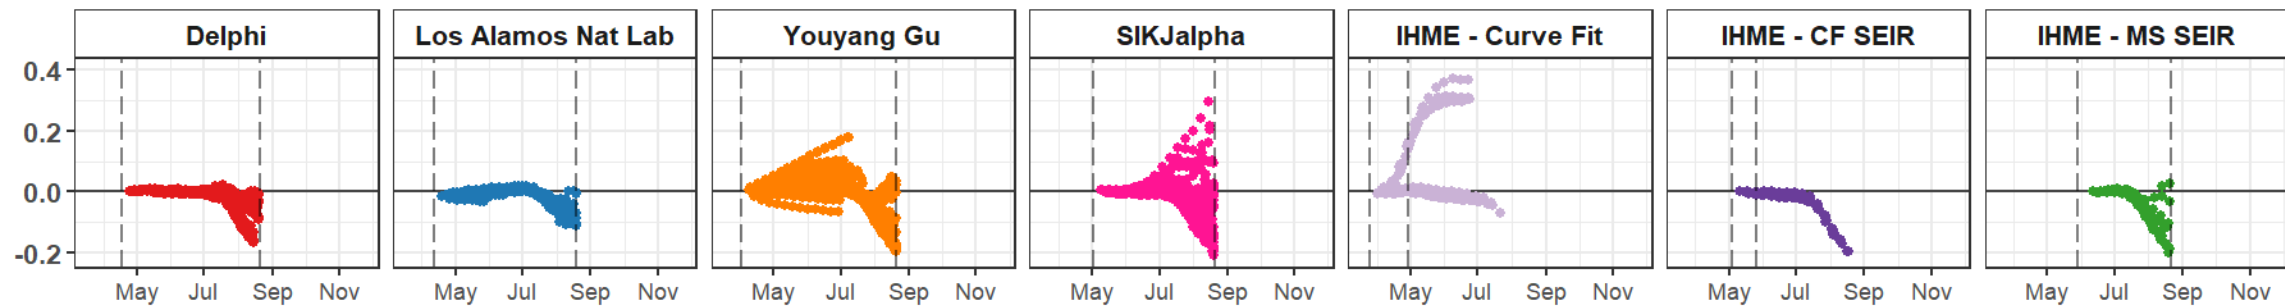

# Zambia

## Current Forecast

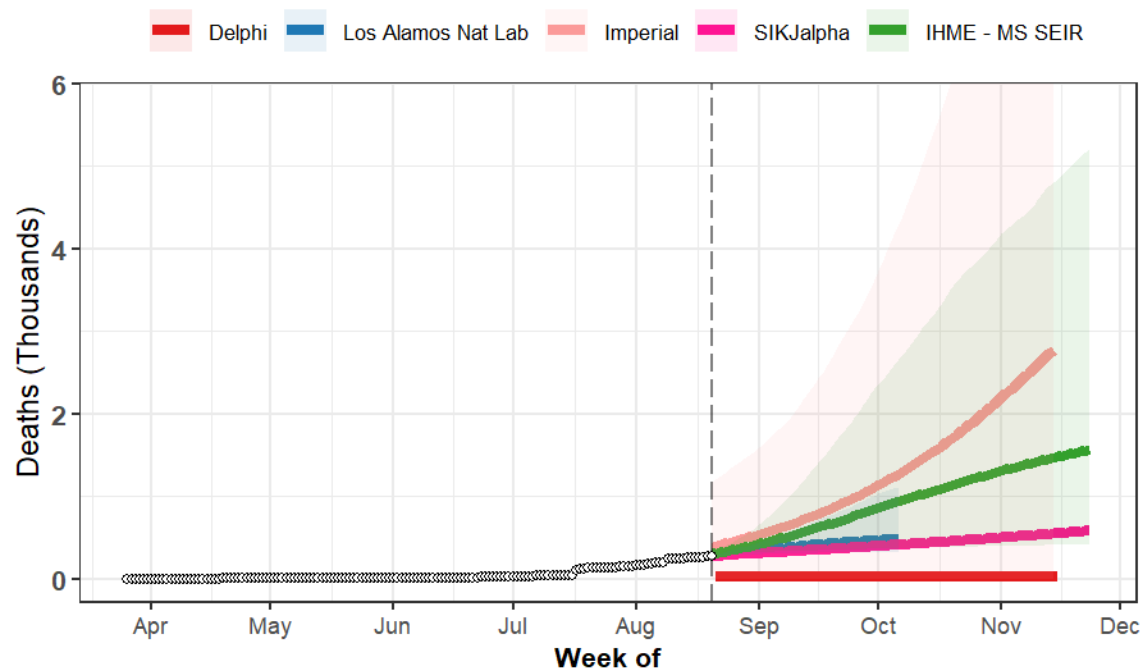

## Cumulative Out-Of-Sample Error (Post Intercept Shift)

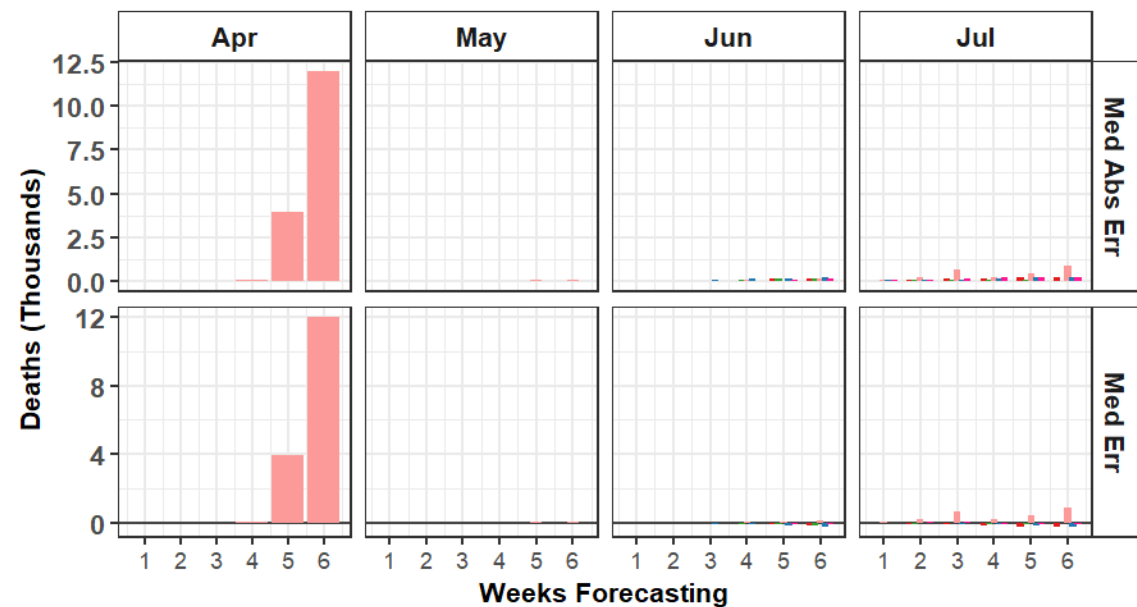

## All Model Versions

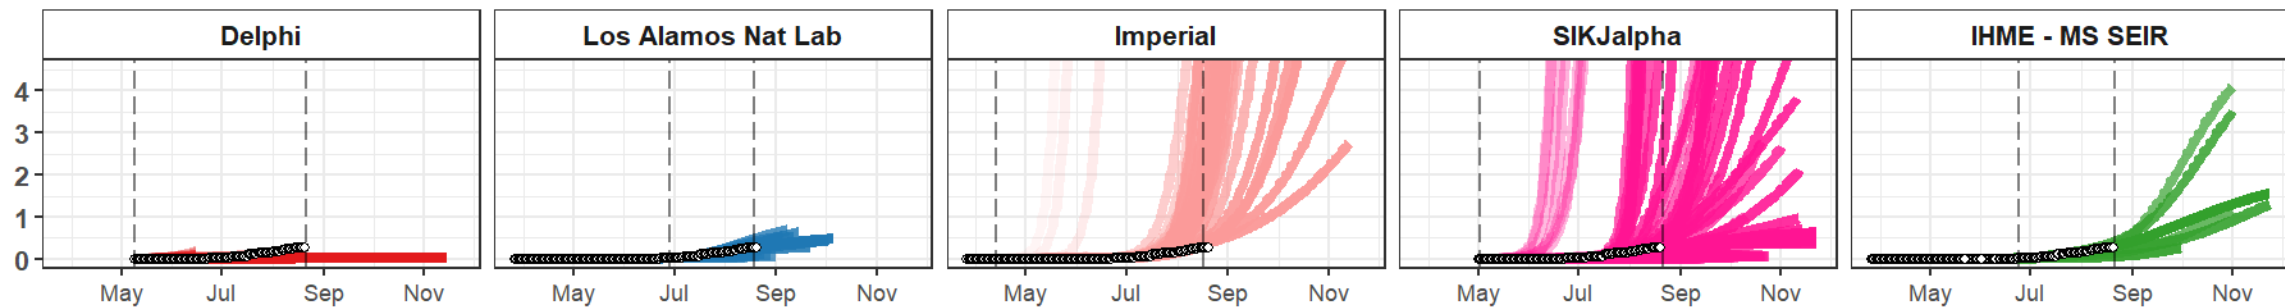

## All Cumulative Errors

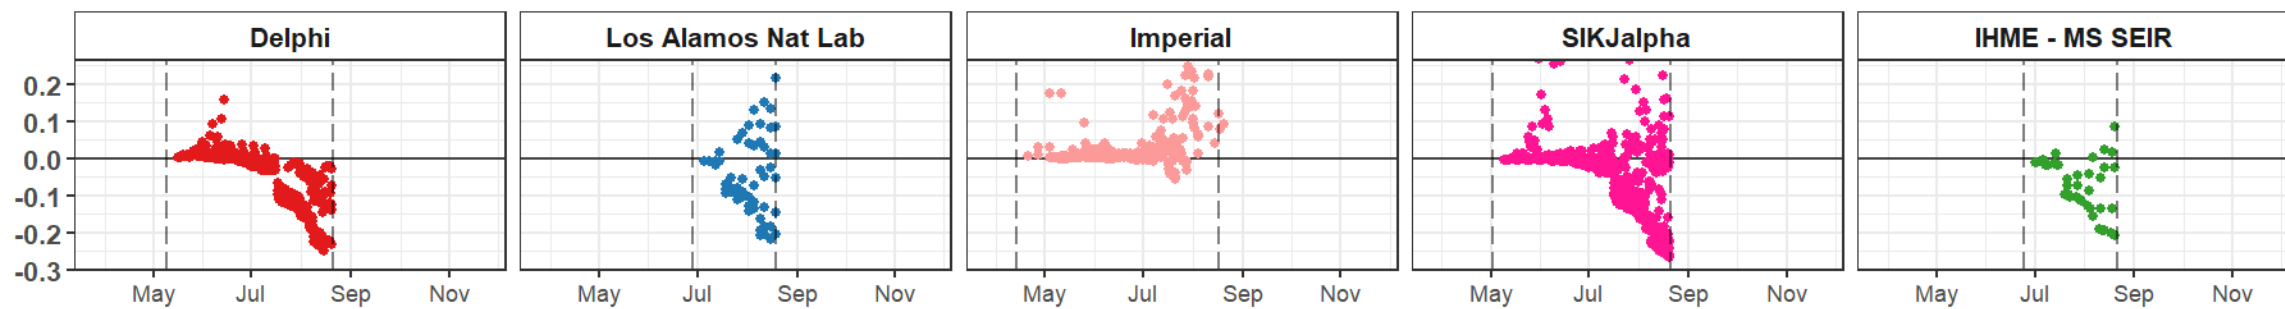

# Norway

## Current Forecast

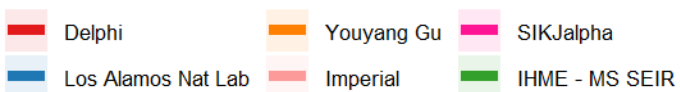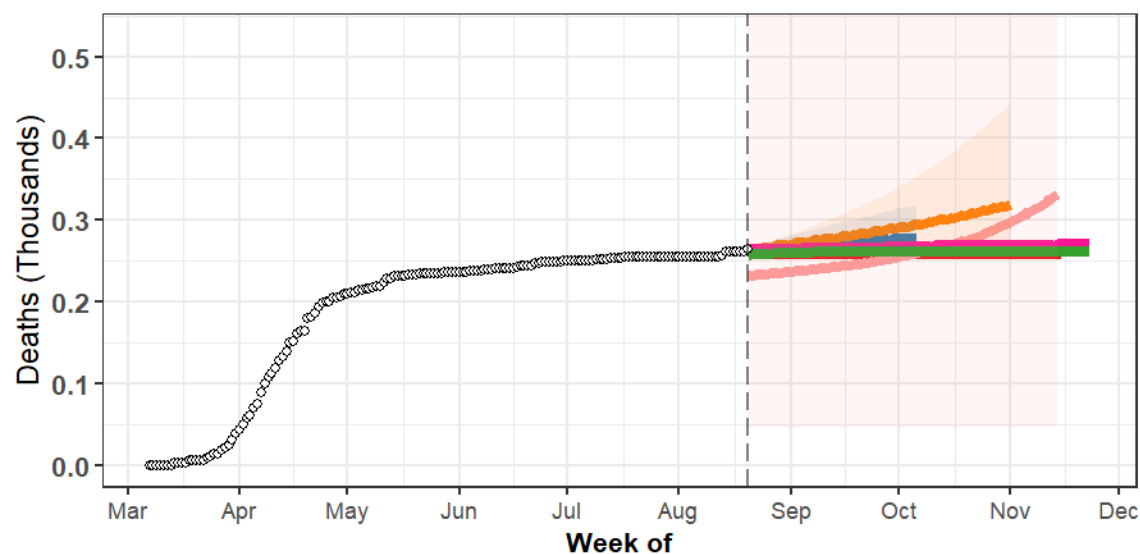

## Cumulative Out-Of-Sample Error (Post Intercept Shift)

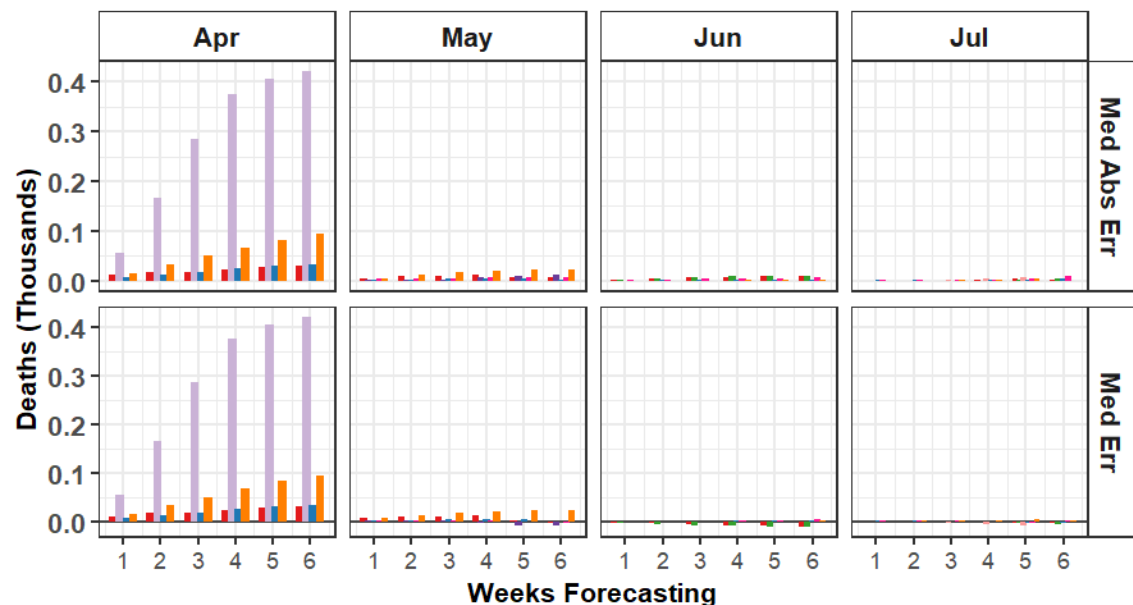

## All Model Versions

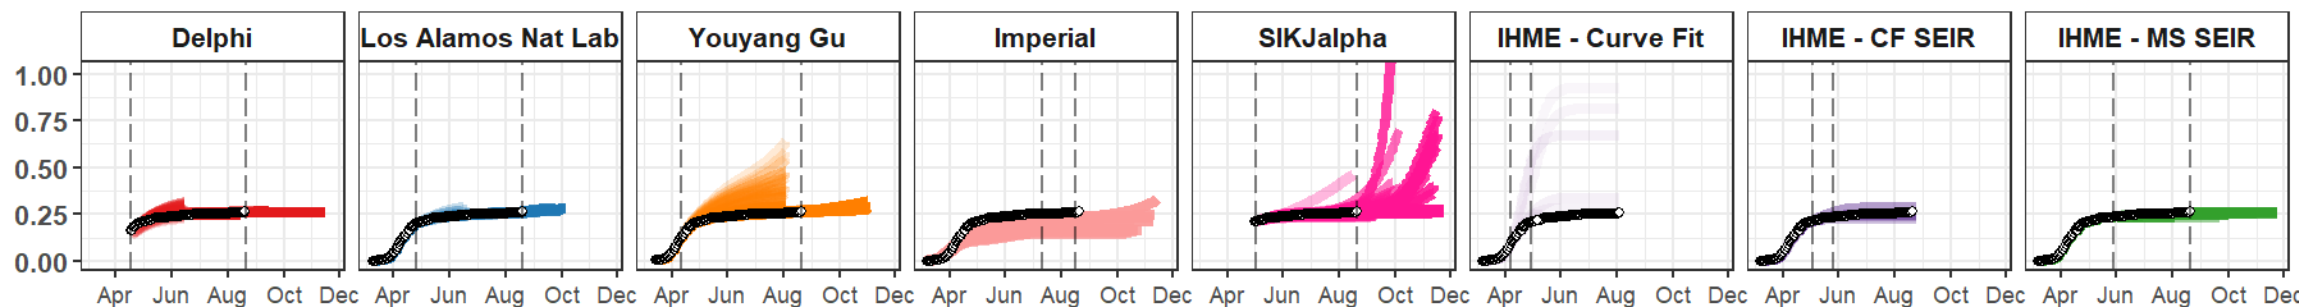

## All Cumulative Errors

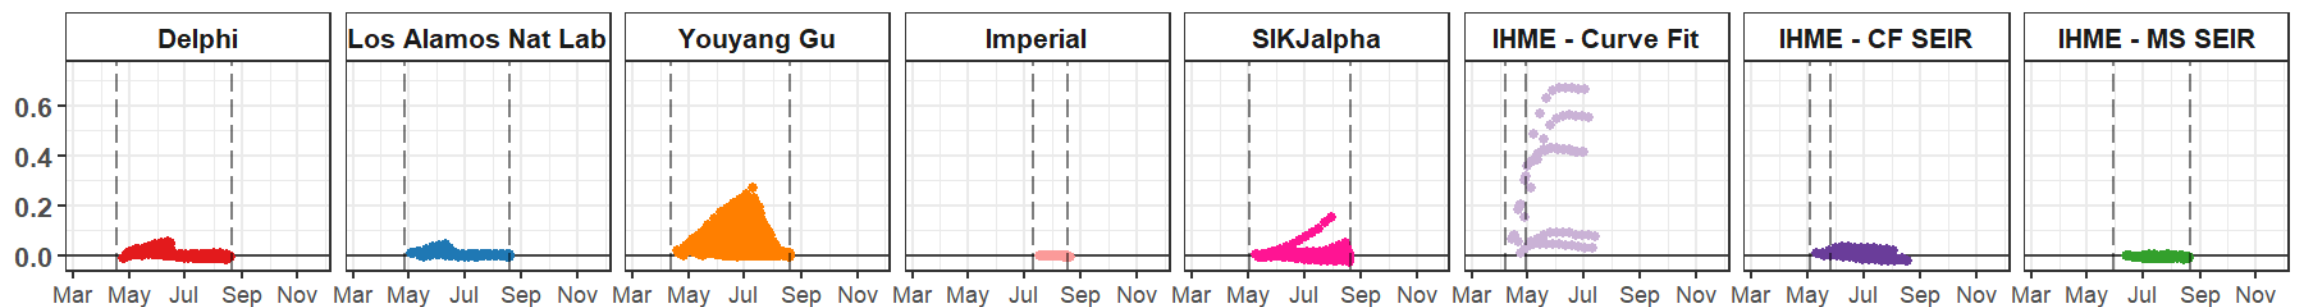

# Ghana

## Current Forecast

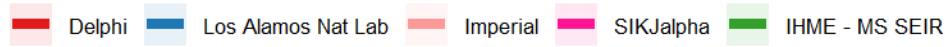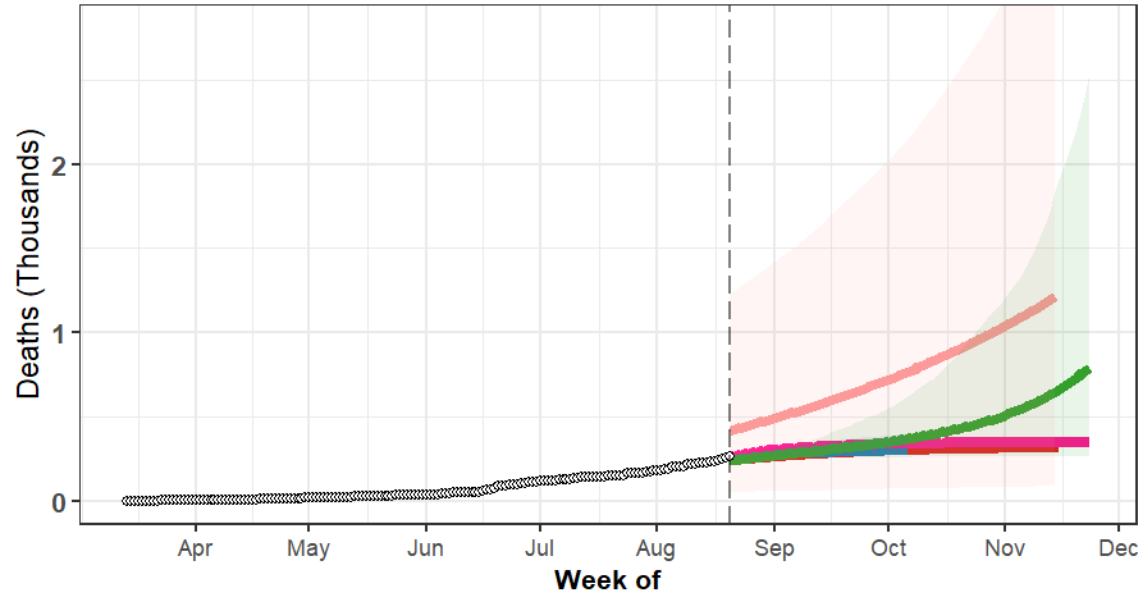

## Cumulative Out-Of-Sample Error (Post Intercept Shift)

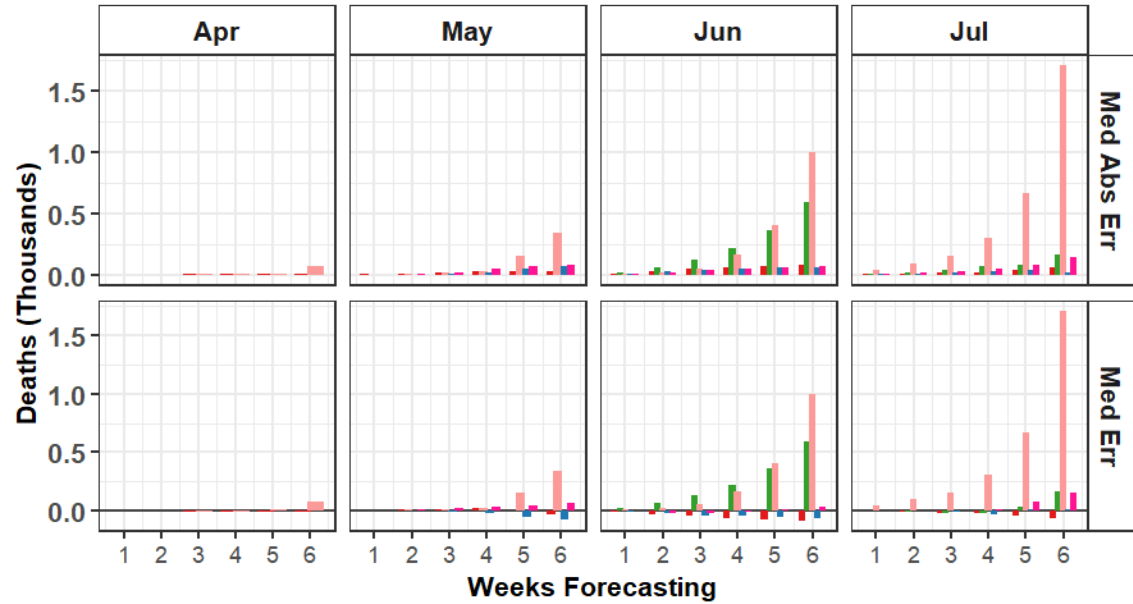

## All Model Versions

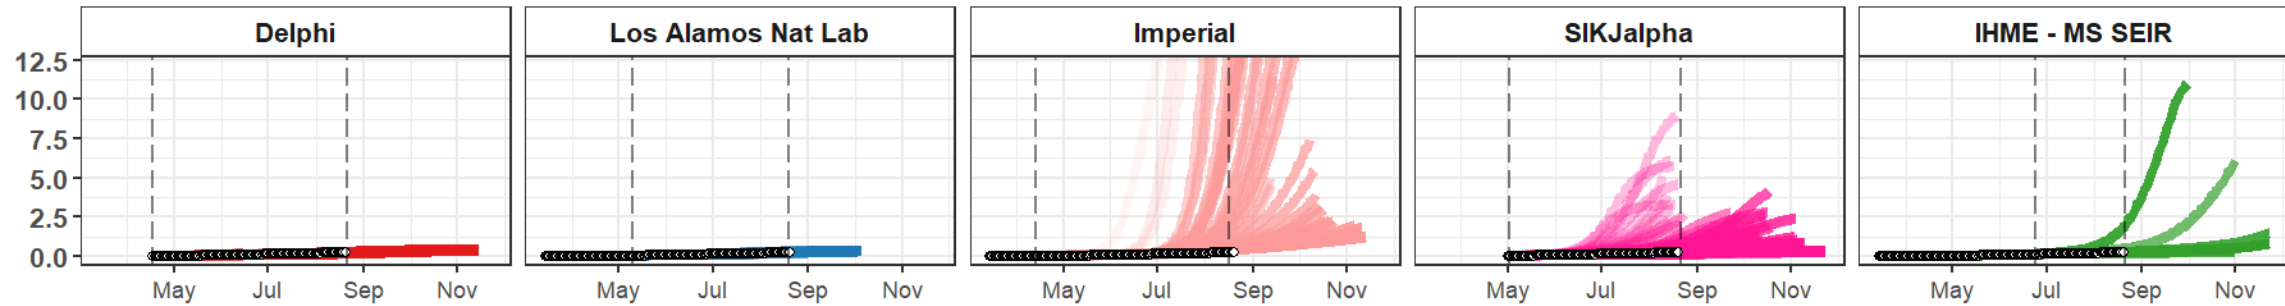

## All Cumulative Errors

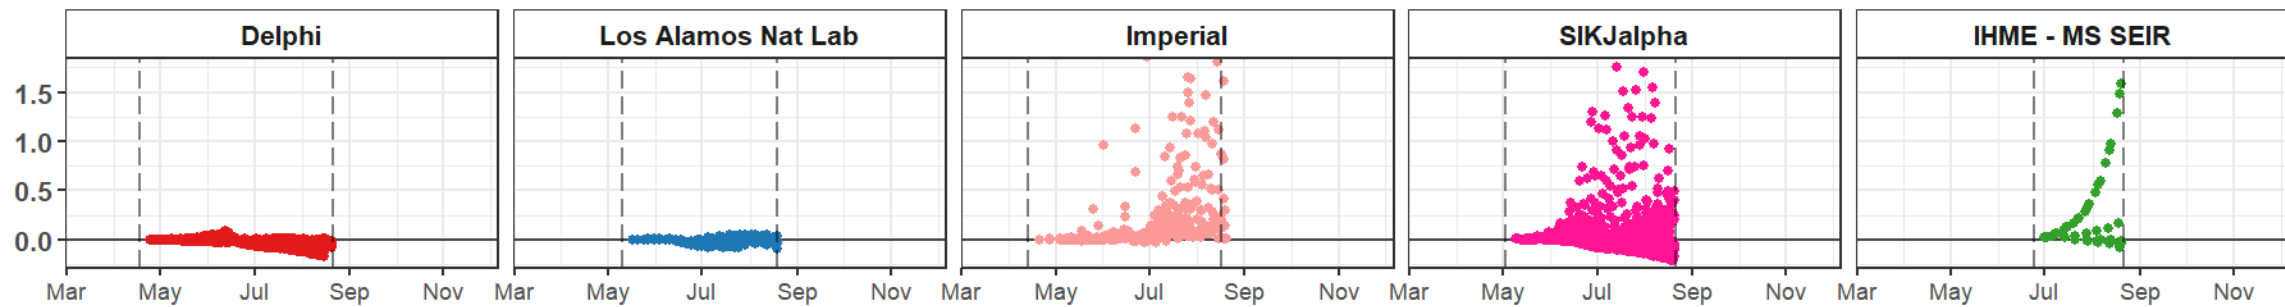

# Senegal

## Current Forecast

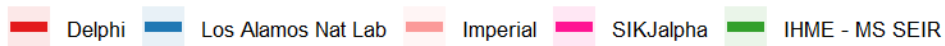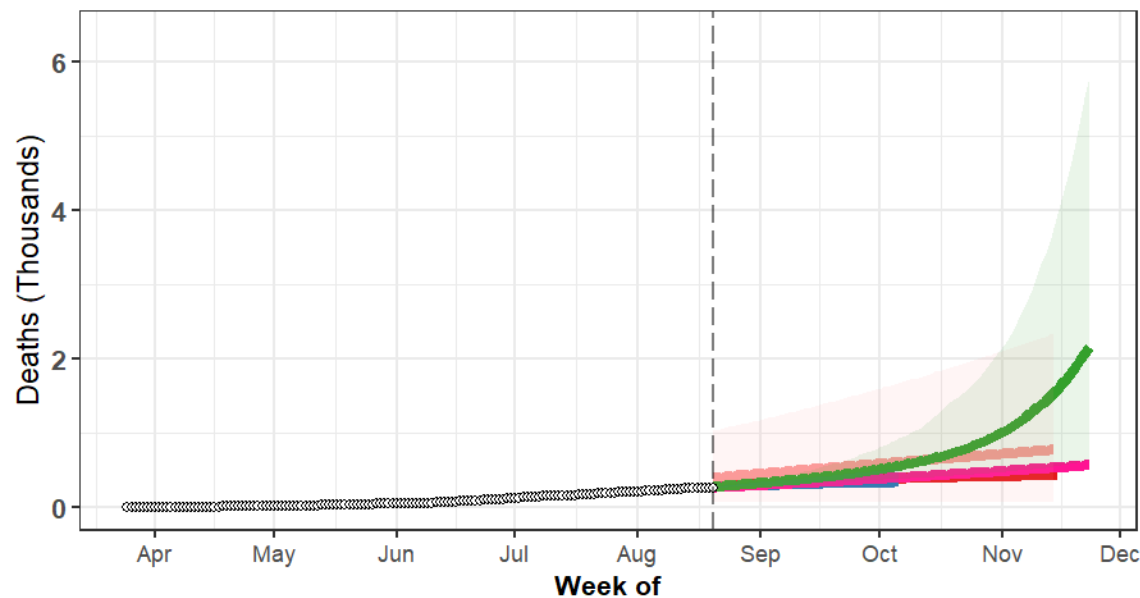

## Cumulative Out-Of-Sample Error (Post Intercept Shift)

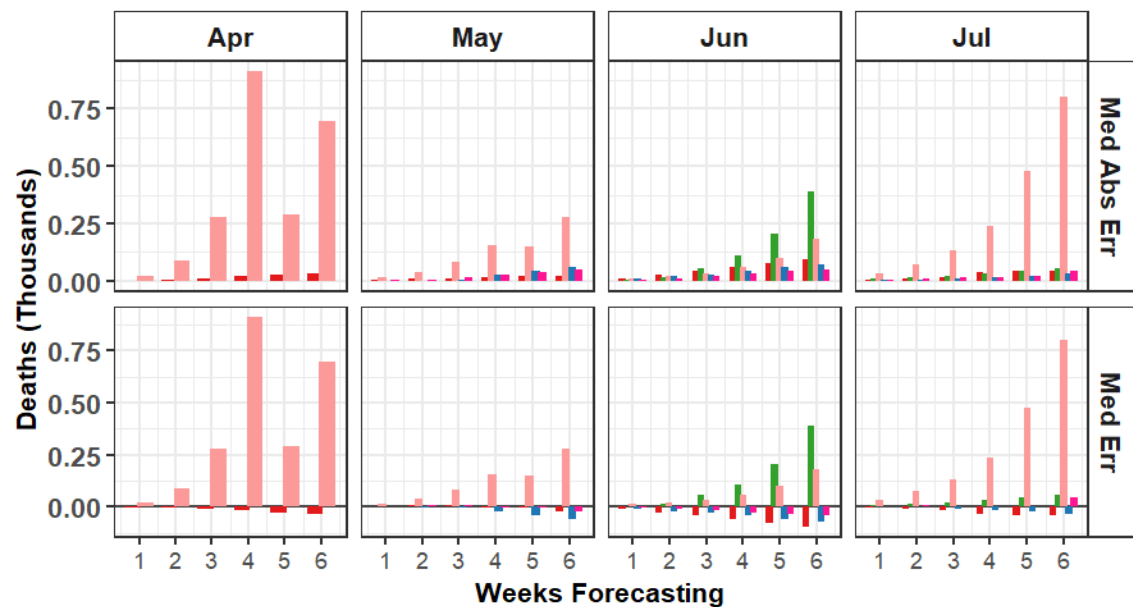

## All Model Versions

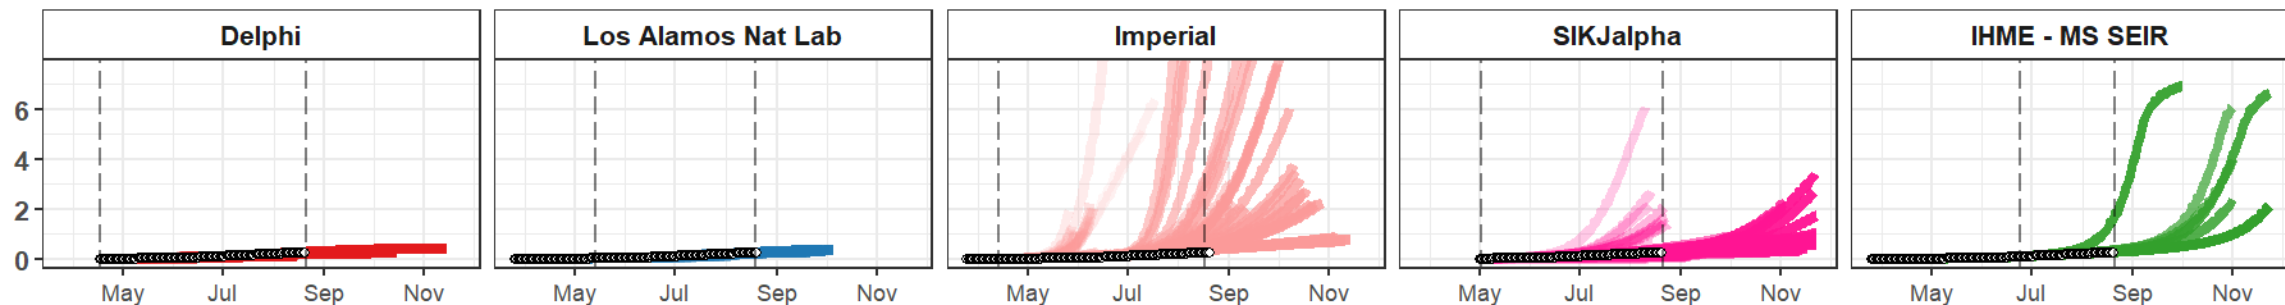

## All Cumulative Errors

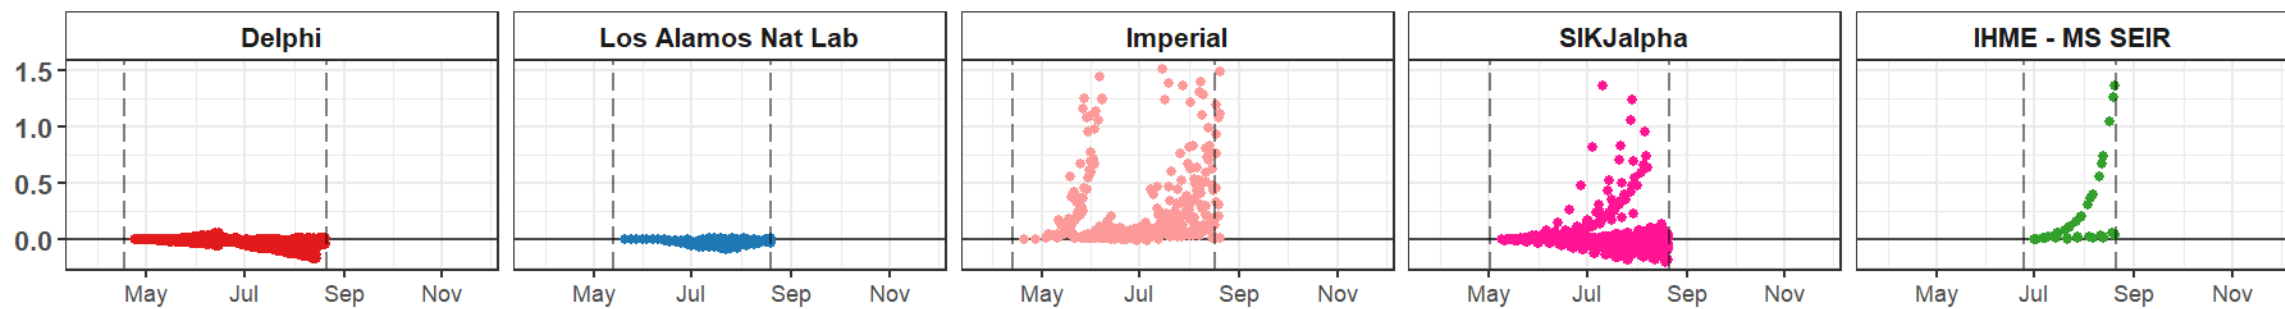



# Uzbekistan

## Current Forecast

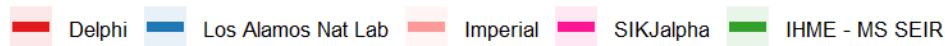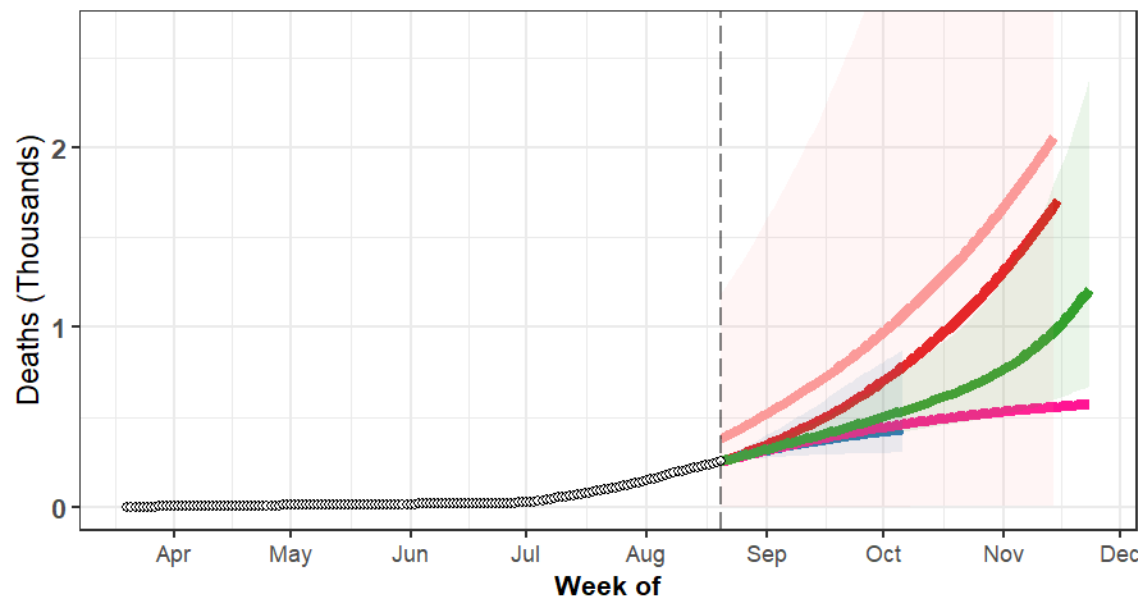

## Cumulative Out-Of-Sample Error (Post Intercept Shift)

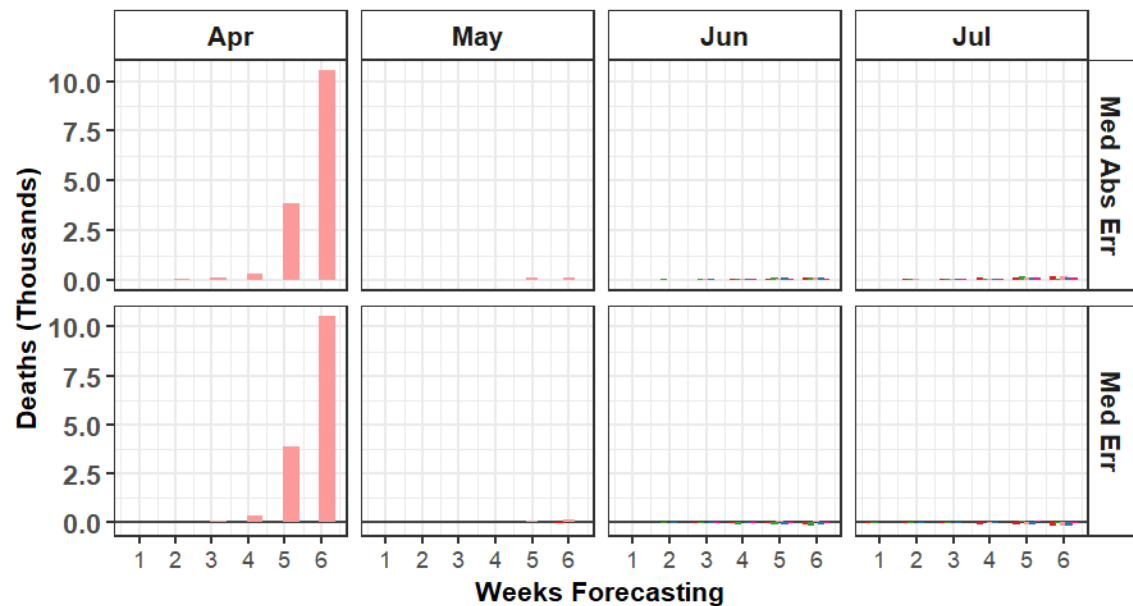

## All Model Versions

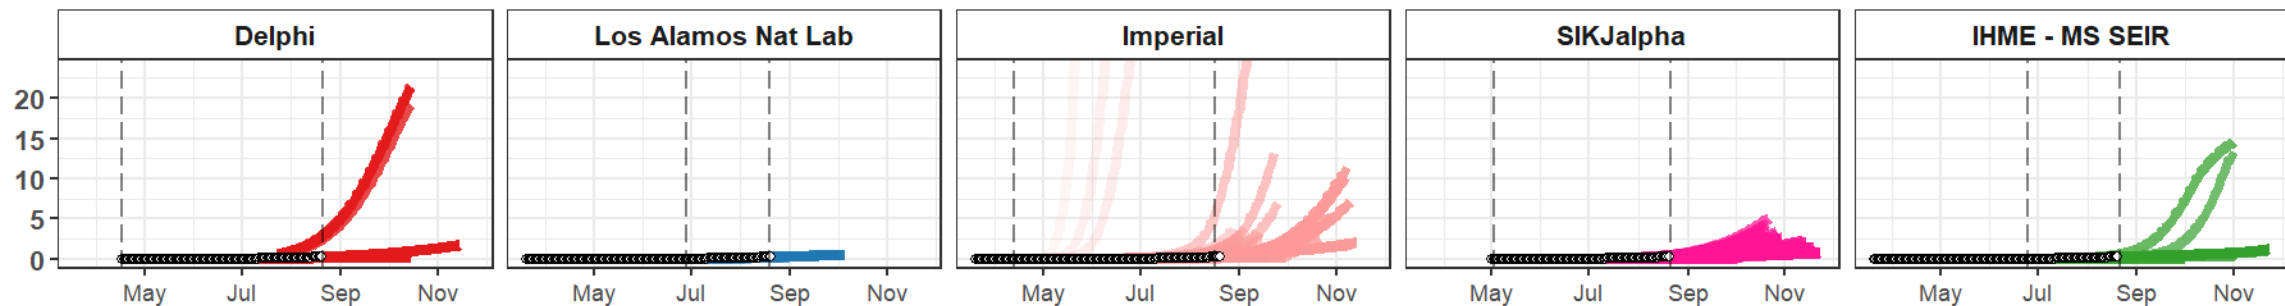

## All Cumulative Errors

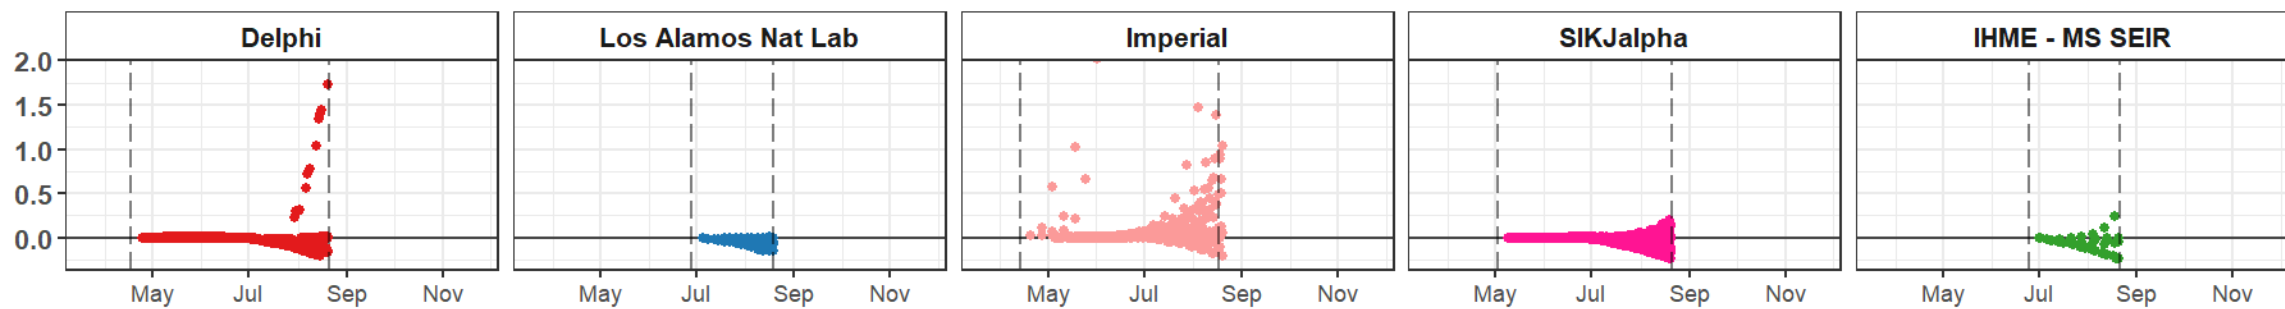

# Democratic Republic of the Congo

## Current Forecast

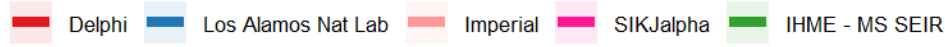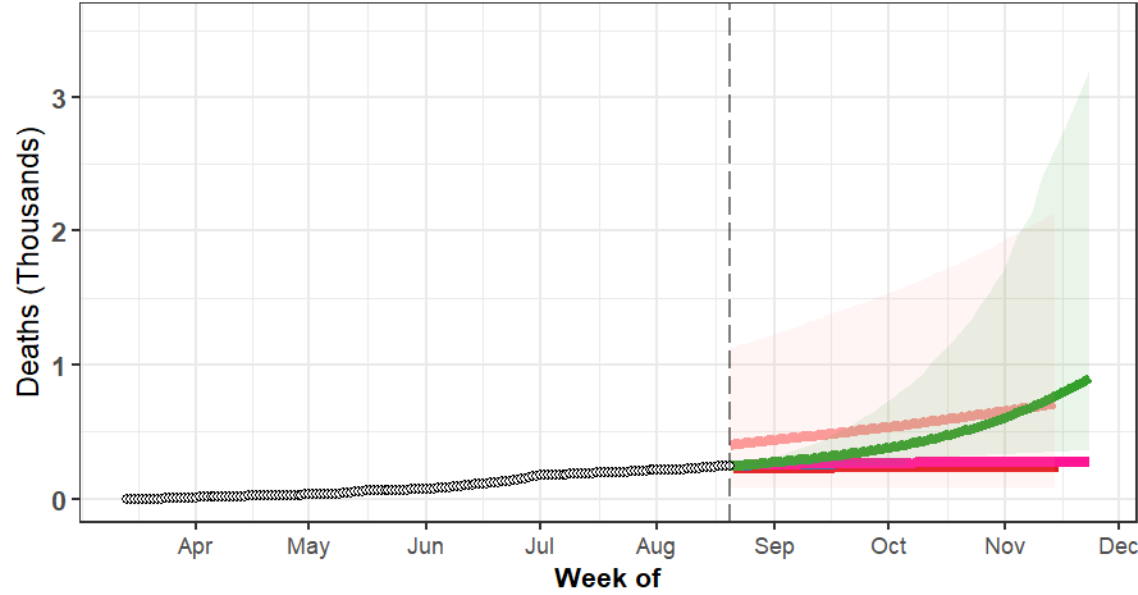

## Cumulative Out-Of-Sample Error (Post Intercept Shift)

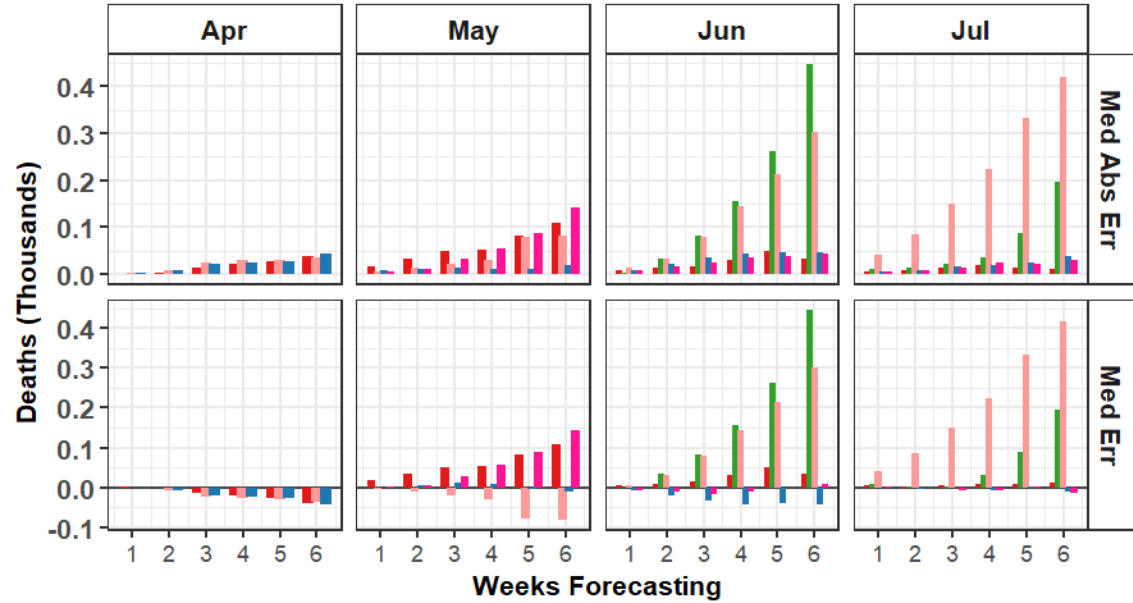

## All Model Versions

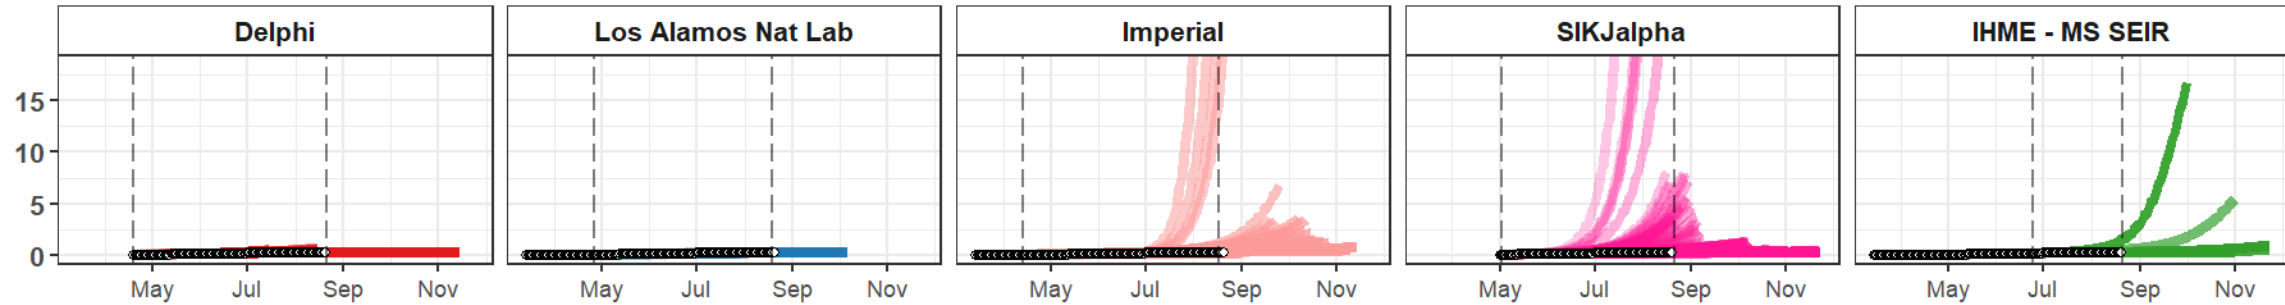

## All Cumulative Errors

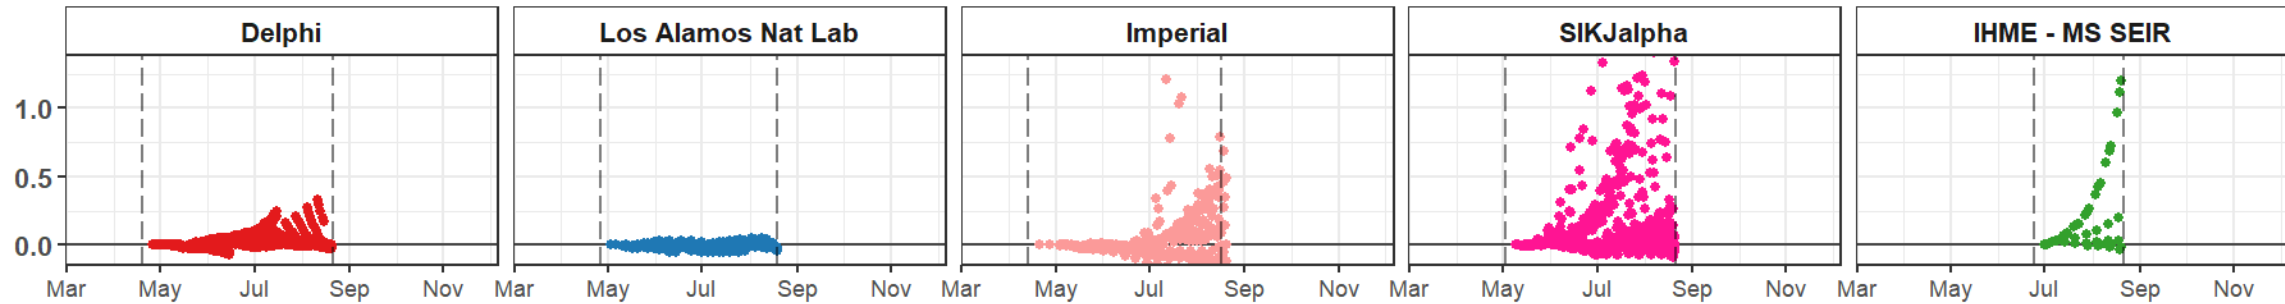

# Albania

## Current Forecast

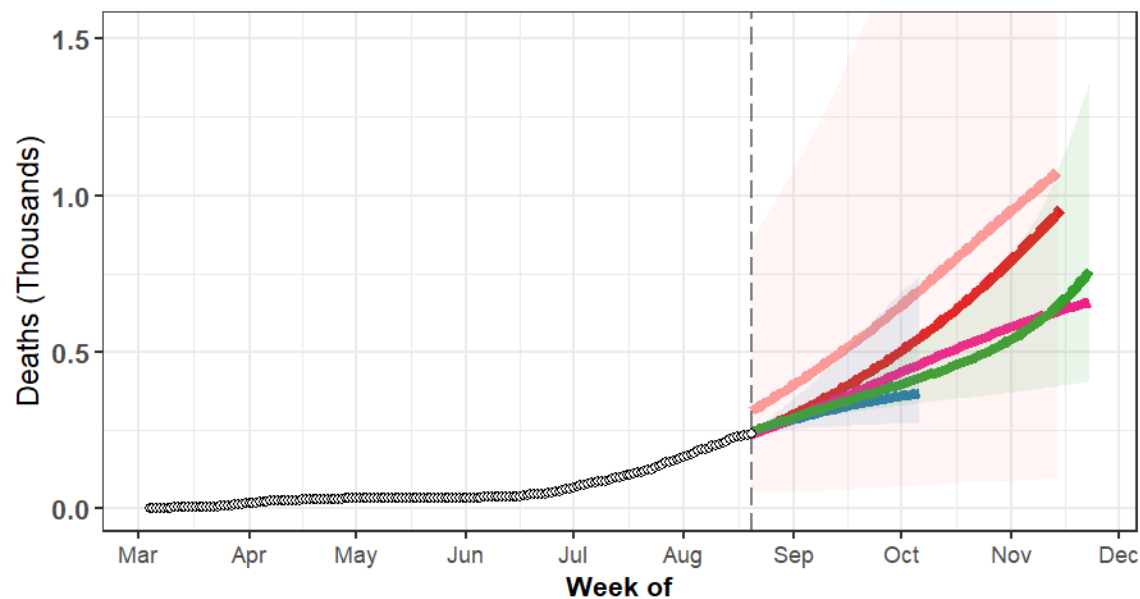

## Cumulative Out-Of-Sample Error (Post Intercept Shift)

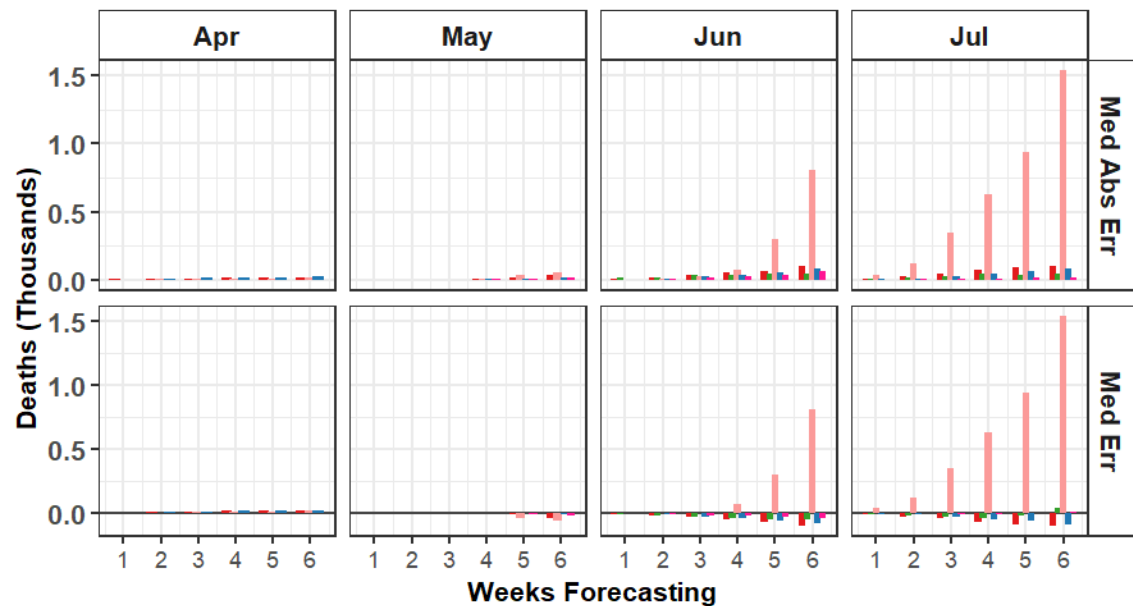

## All Model Versions

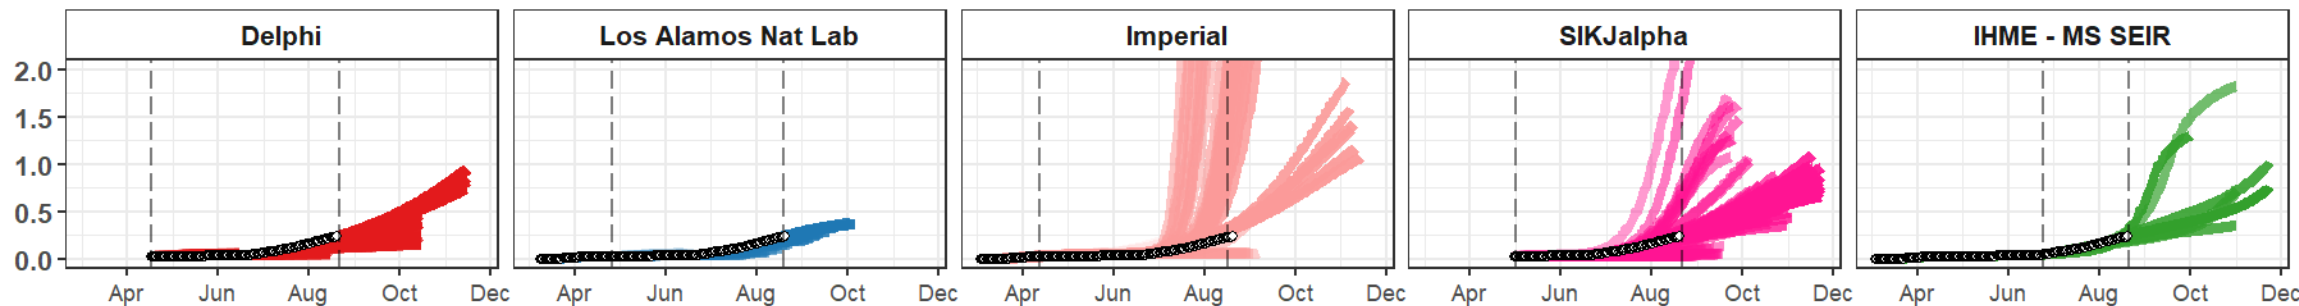

## All Cumulative Errors

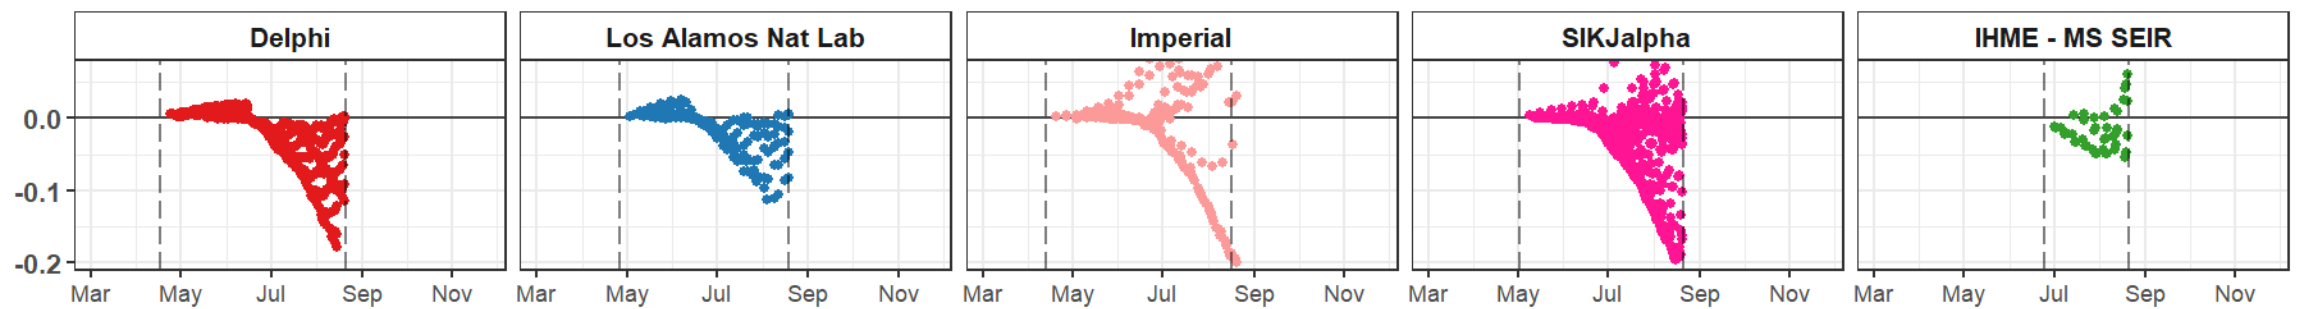

# Greece

## Current Forecast

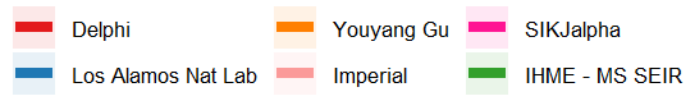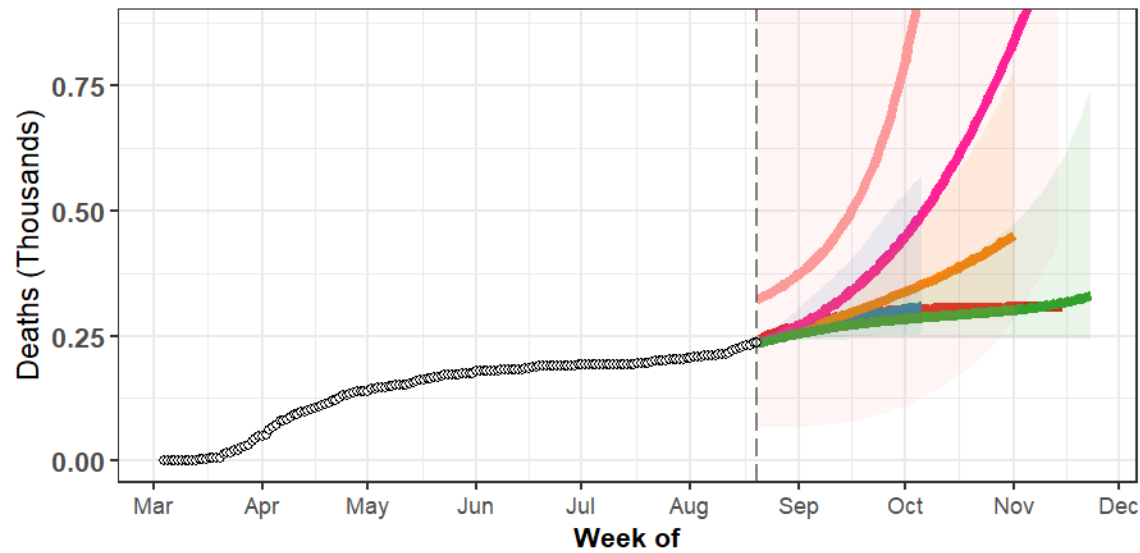

## Cumulative Out-Of-Sample Error (Post Intercept Shift)

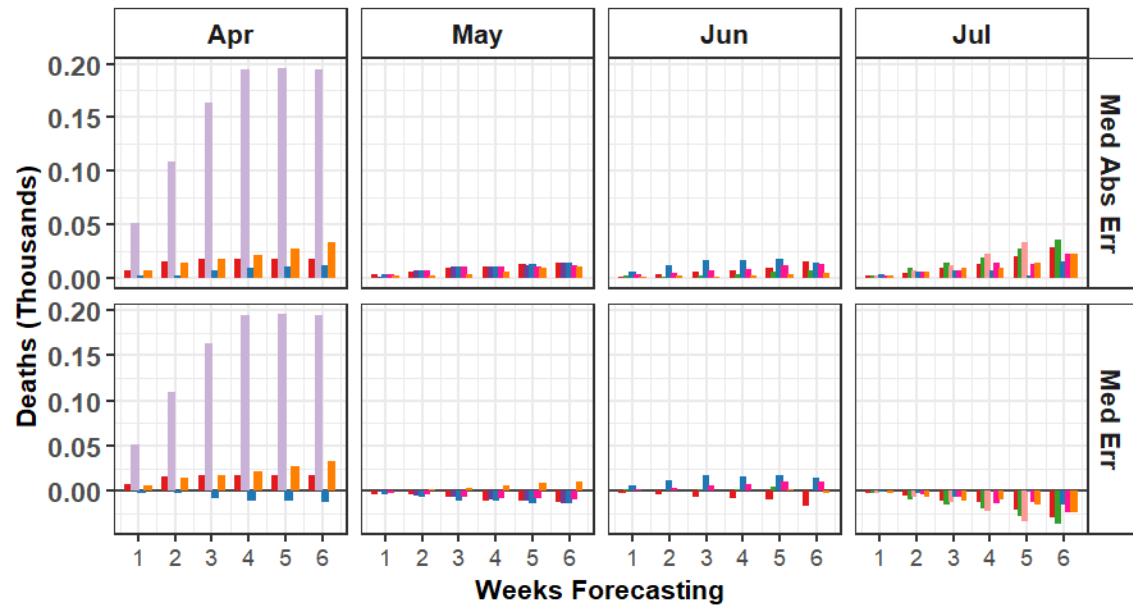

## All Model Versions

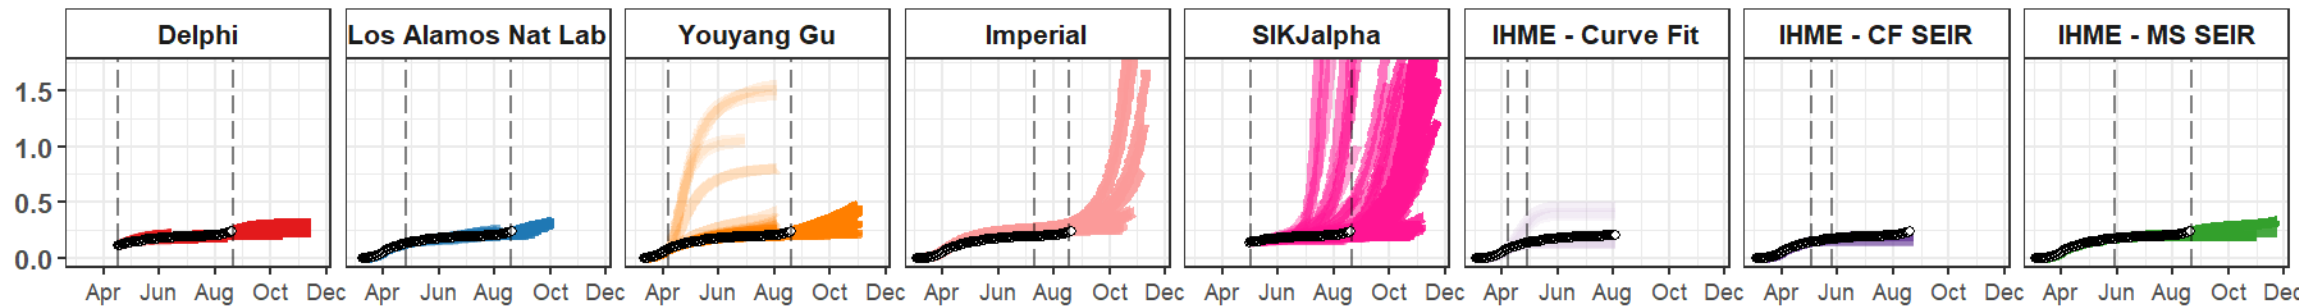

## All Cumulative Errors

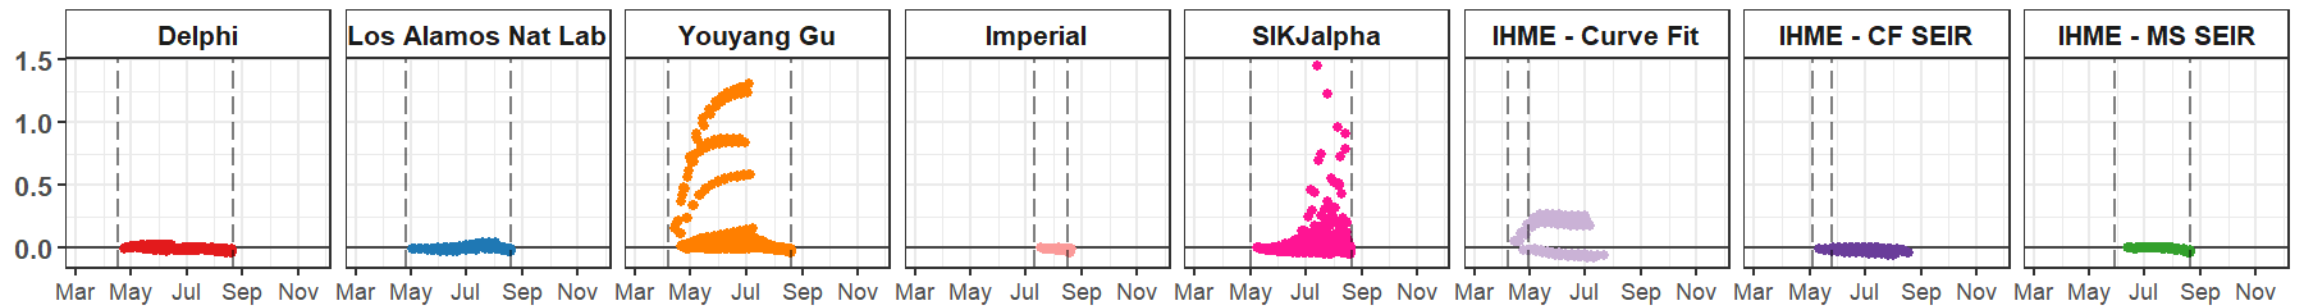

# Haiti

## Current Forecast

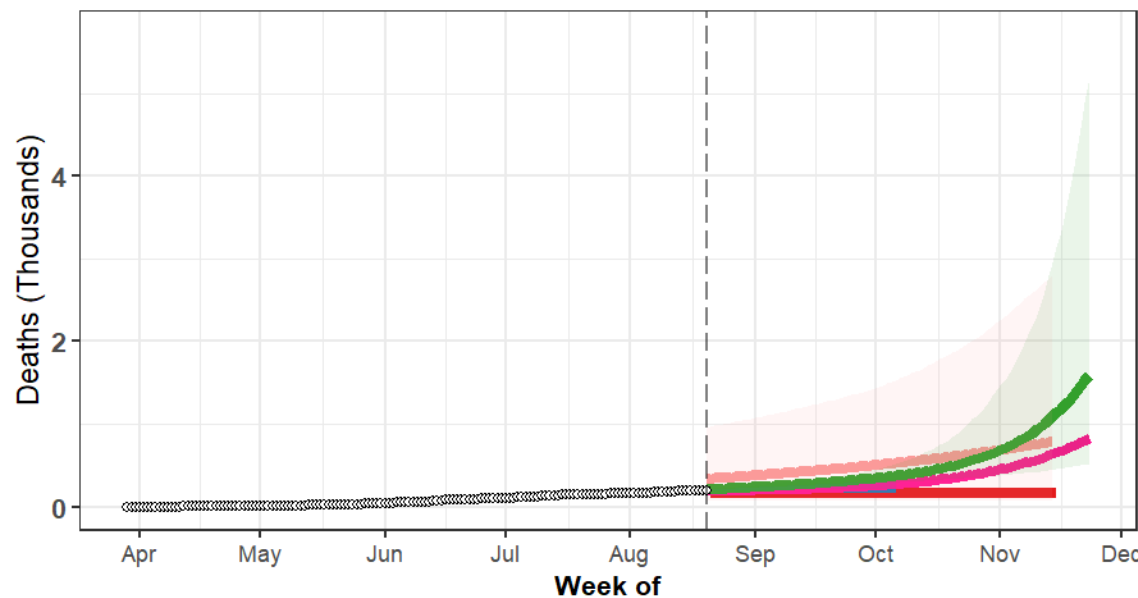

## Cumulative Out-Of-Sample Error (Post Intercept Shift)

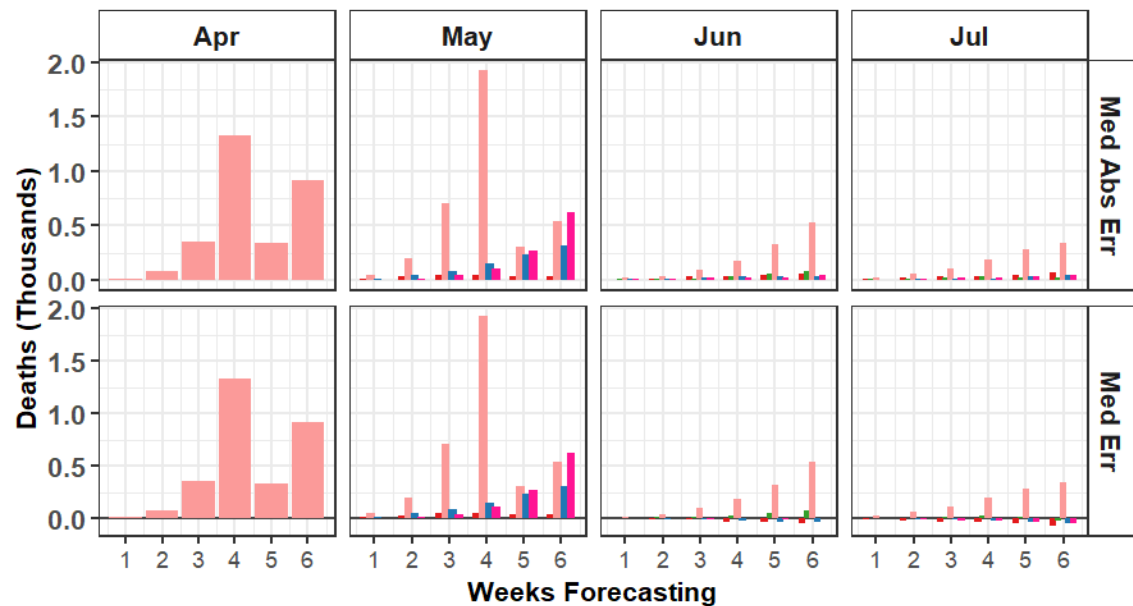

## All Model Versions

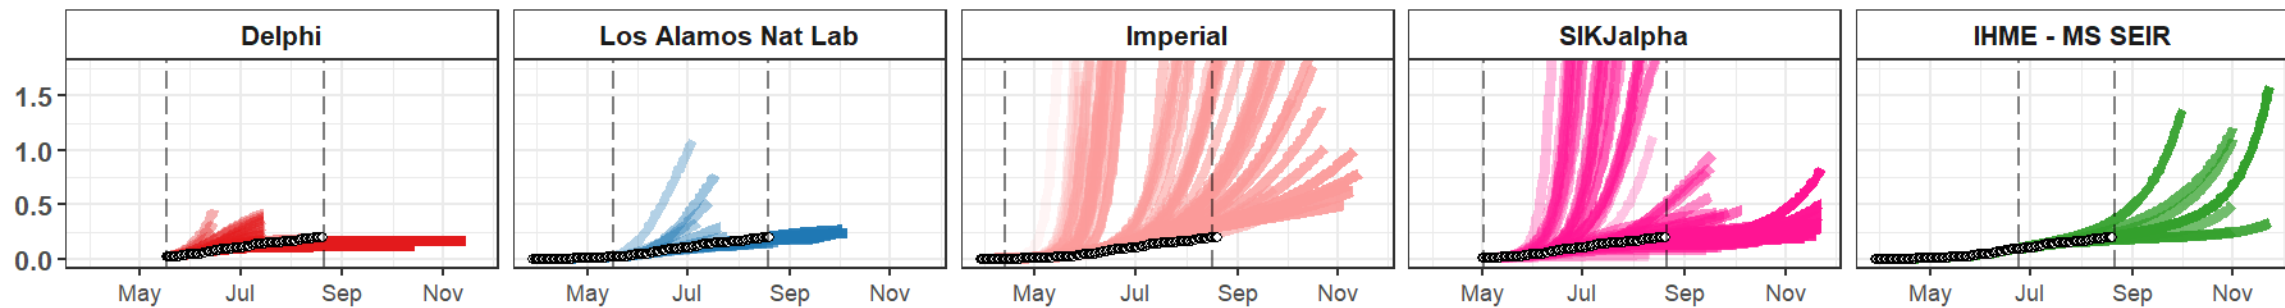

## All Cumulative Errors

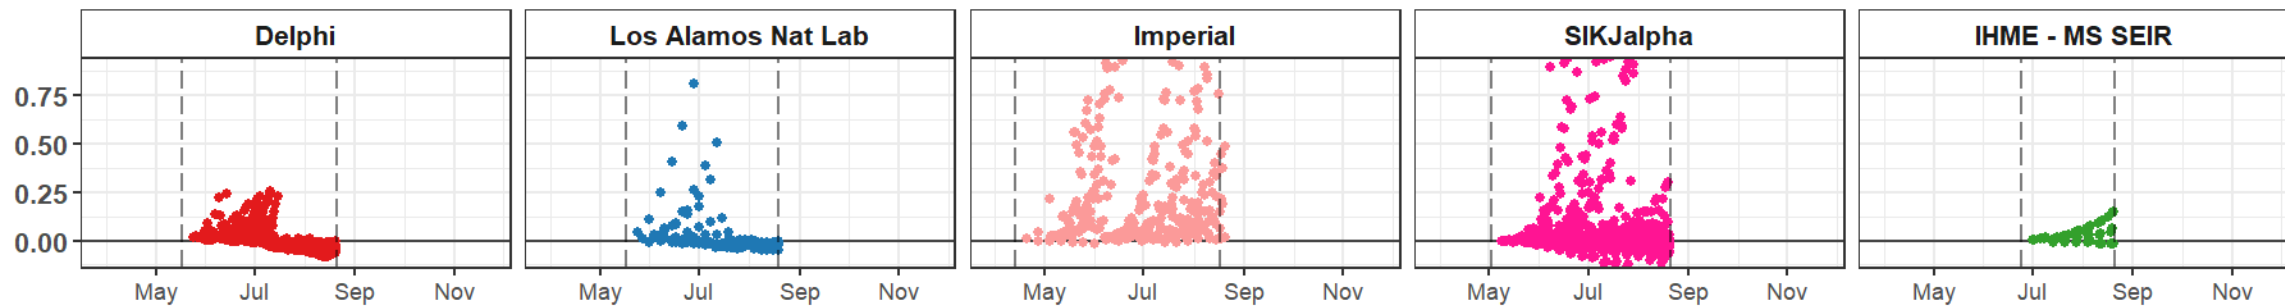

# Qatar

## Current Forecast

Delphi Los Alamos Nat Lab Imperial SIKJalpha IHME - MS SEIR

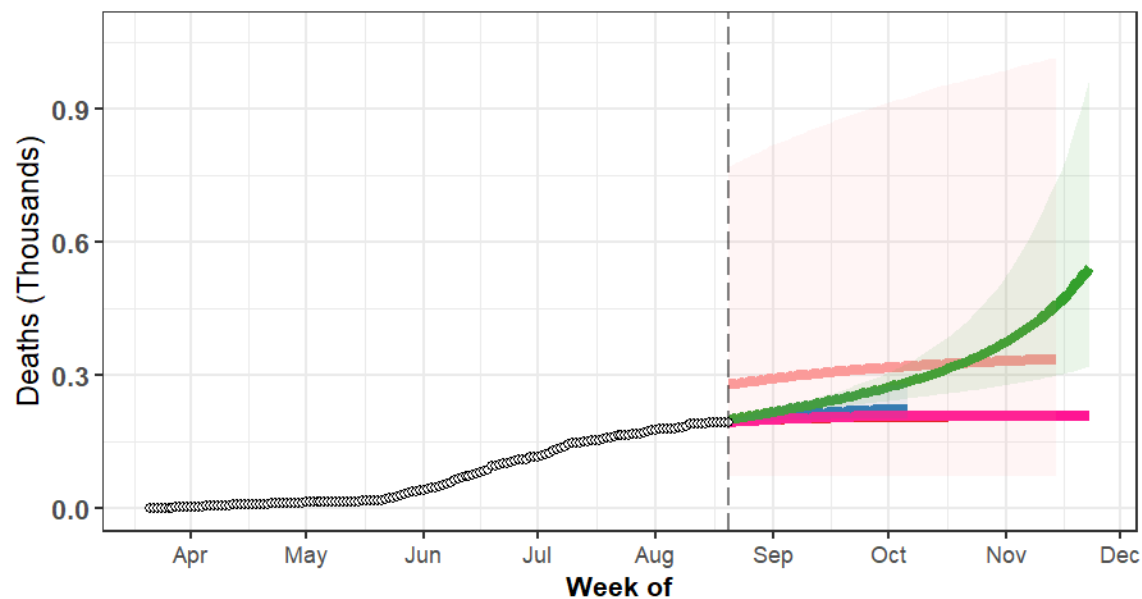

## Cumulative Out-Of-Sample Error (Post Intercept Shift)

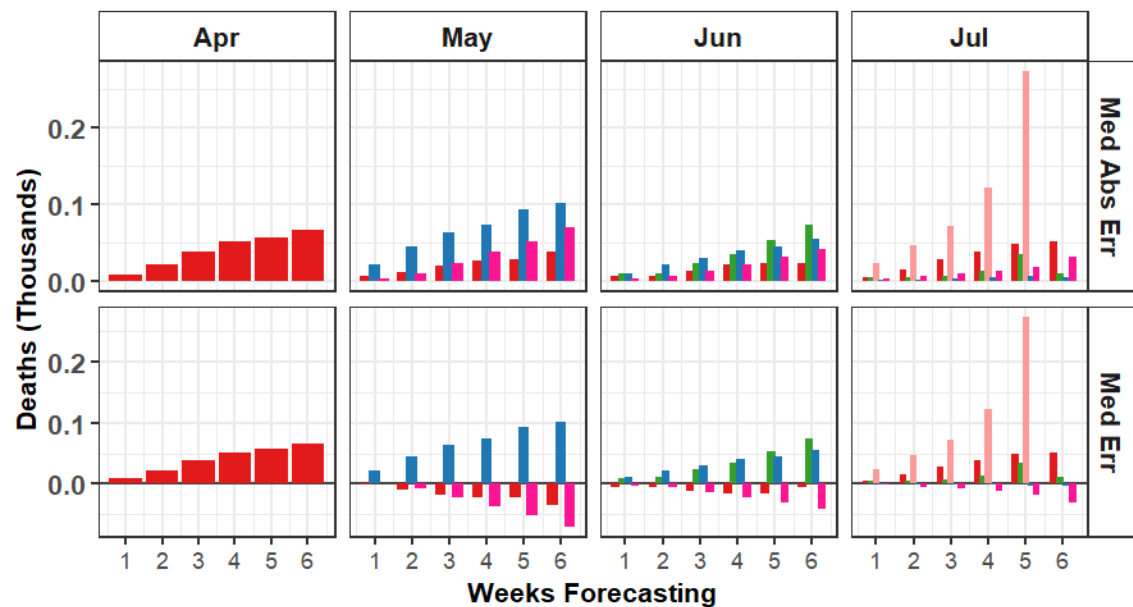

## All Model Versions

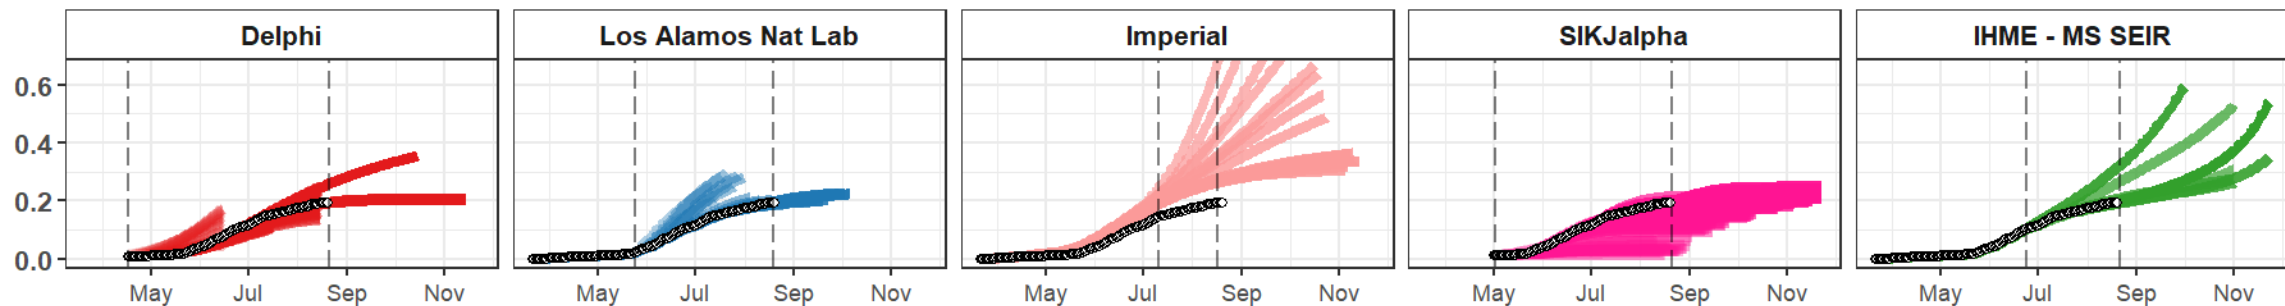

## All Cumulative Errors

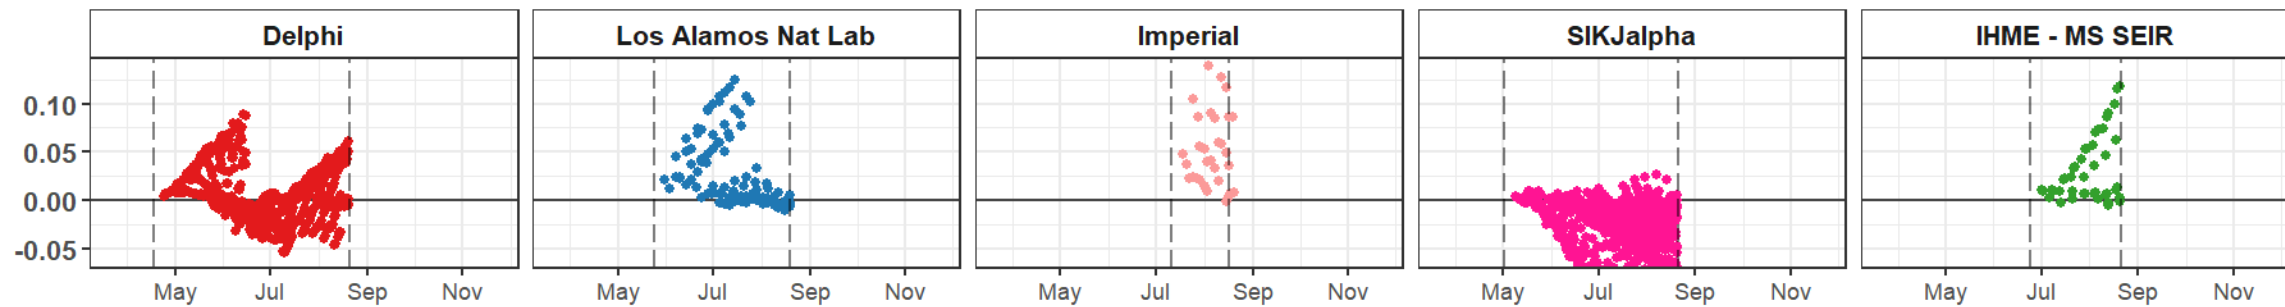

# Bahrain

## Current Forecast

Delphi Los Alamos Nat Lab Imperial SIKJalpha IHME - MS SEIR

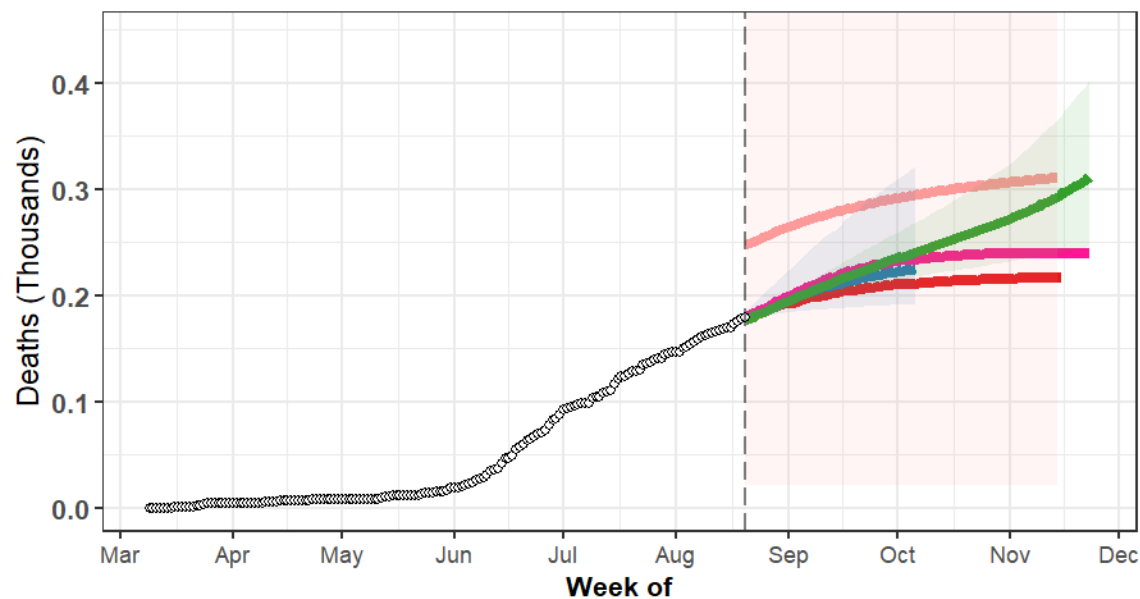

## Cumulative Out-Of-Sample Error (Post Intercept Shift)

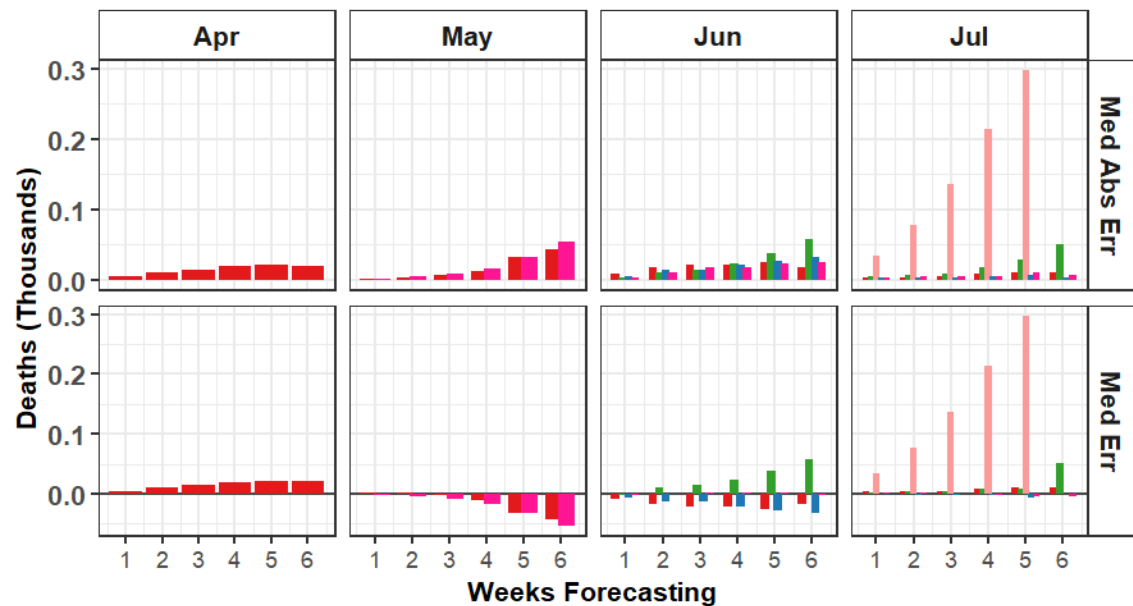

## All Model Versions

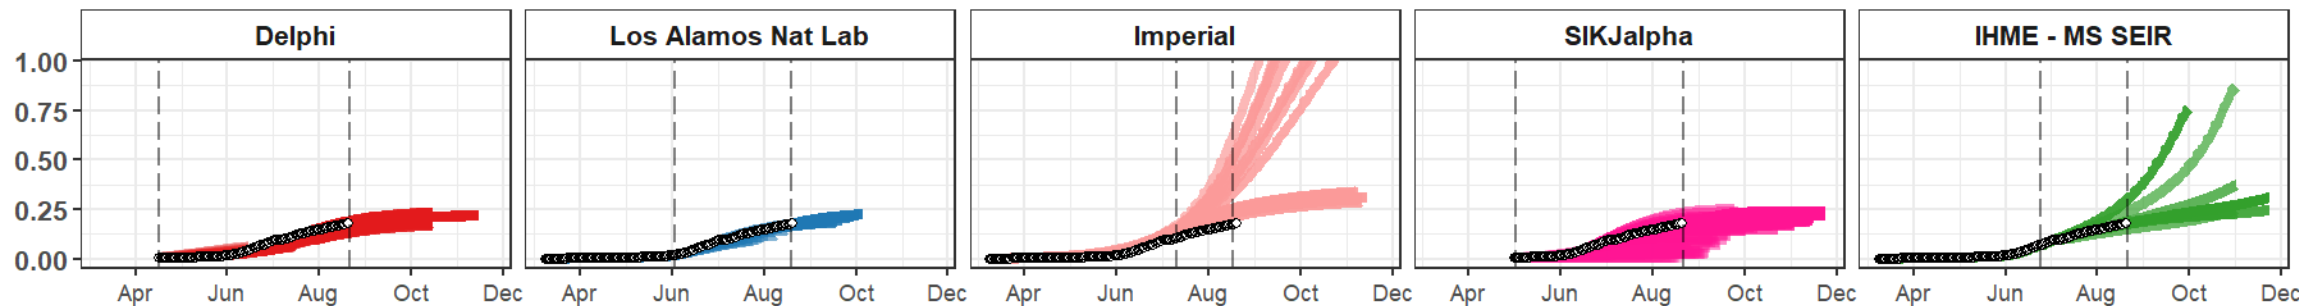

## All Cumulative Errors

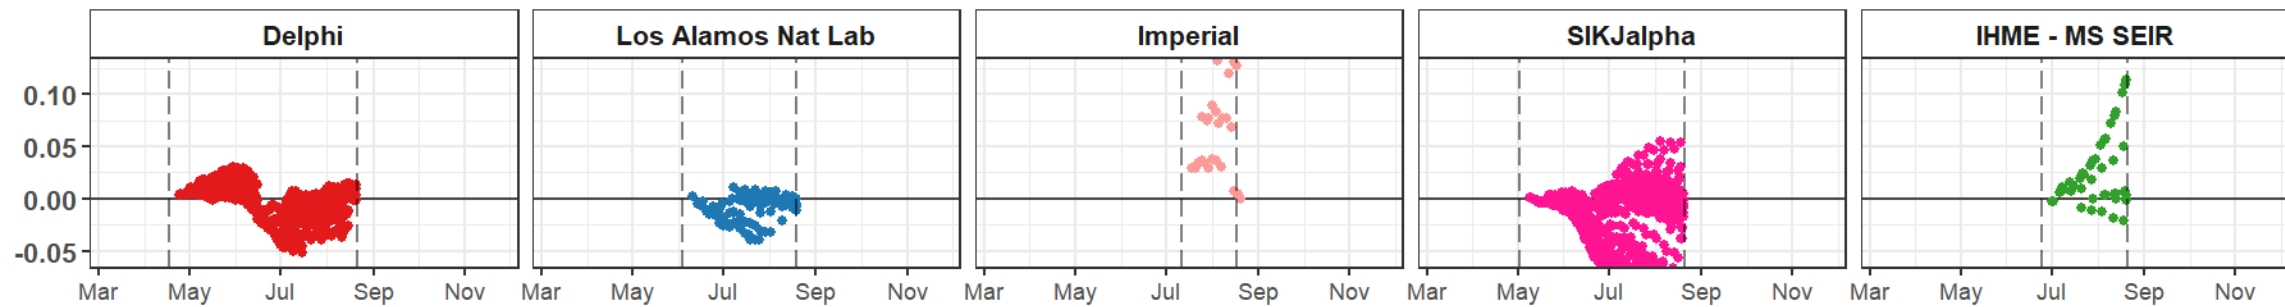

# Madagascar

## Current Forecast

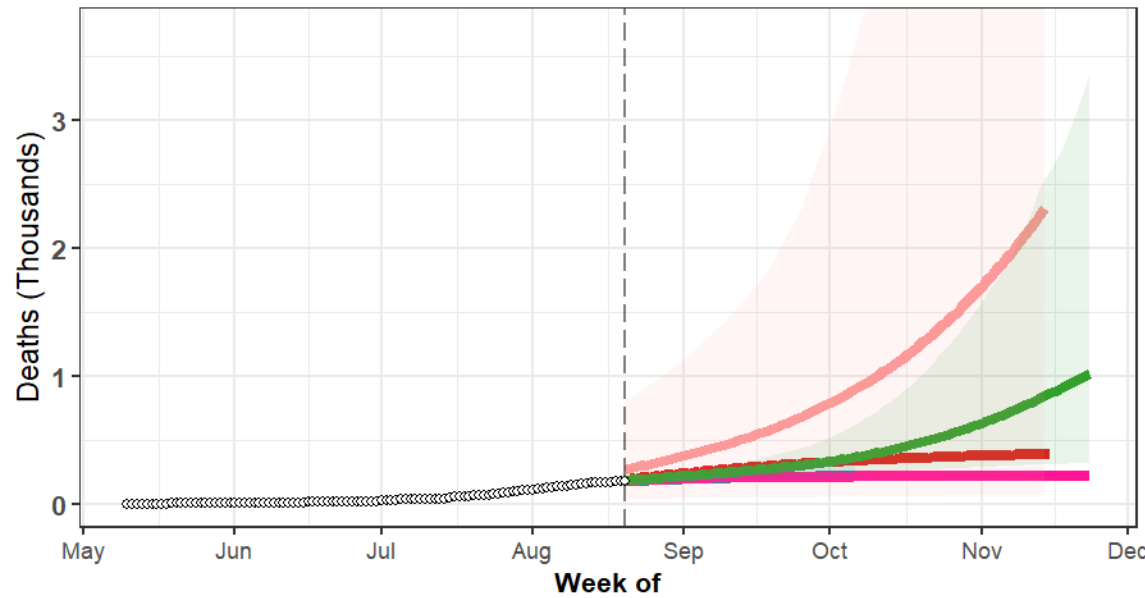

## Cumulative Out-Of-Sample Error (Post Intercept Shift)

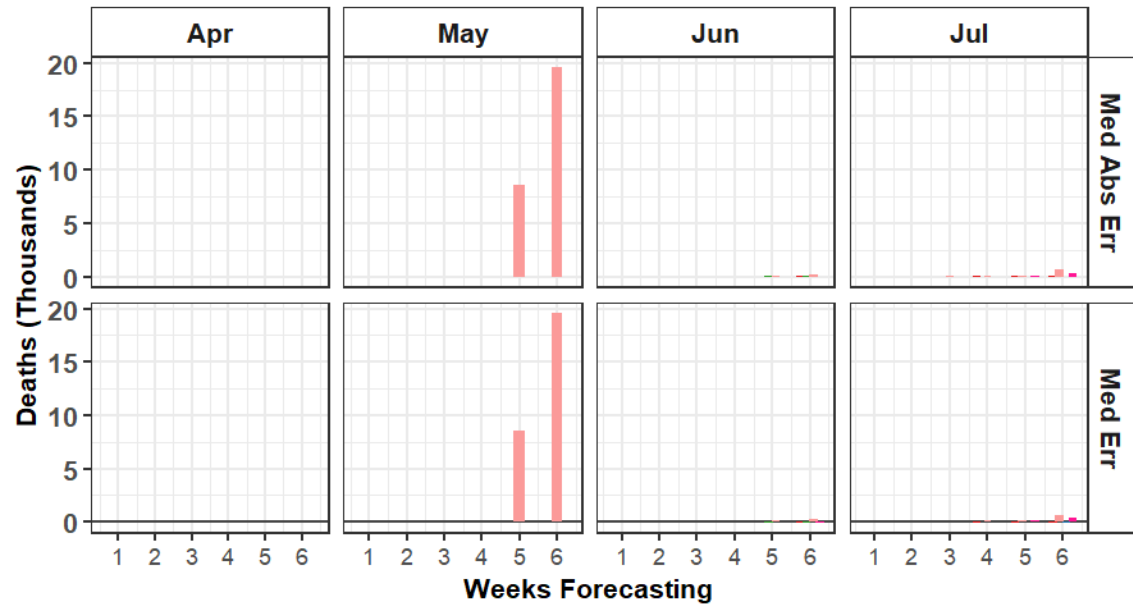

## All Model Versions

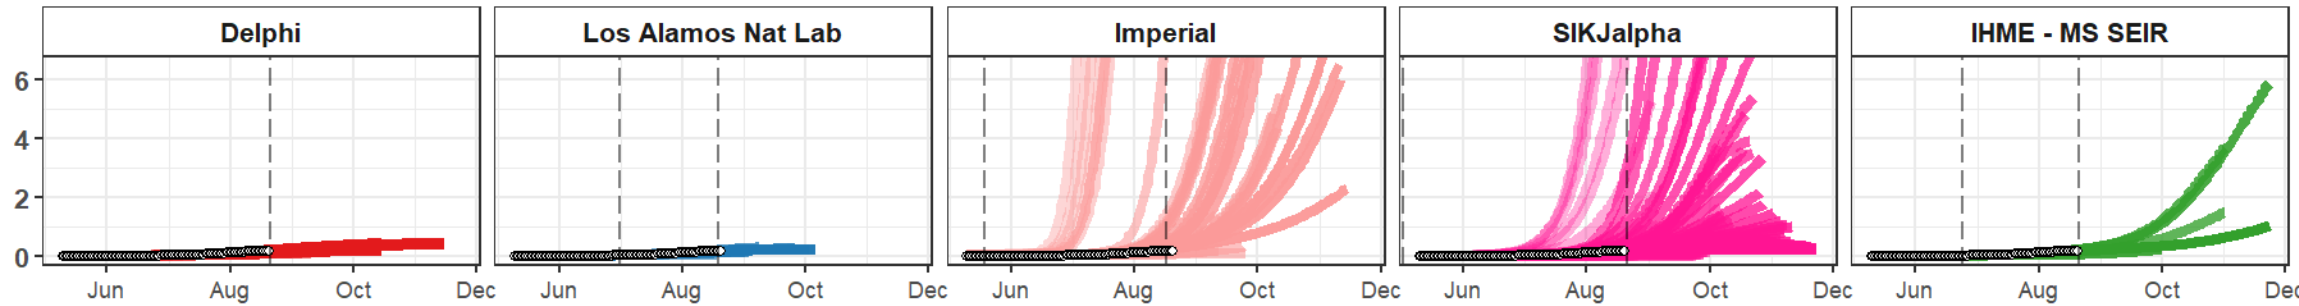

## All Cumulative Errors

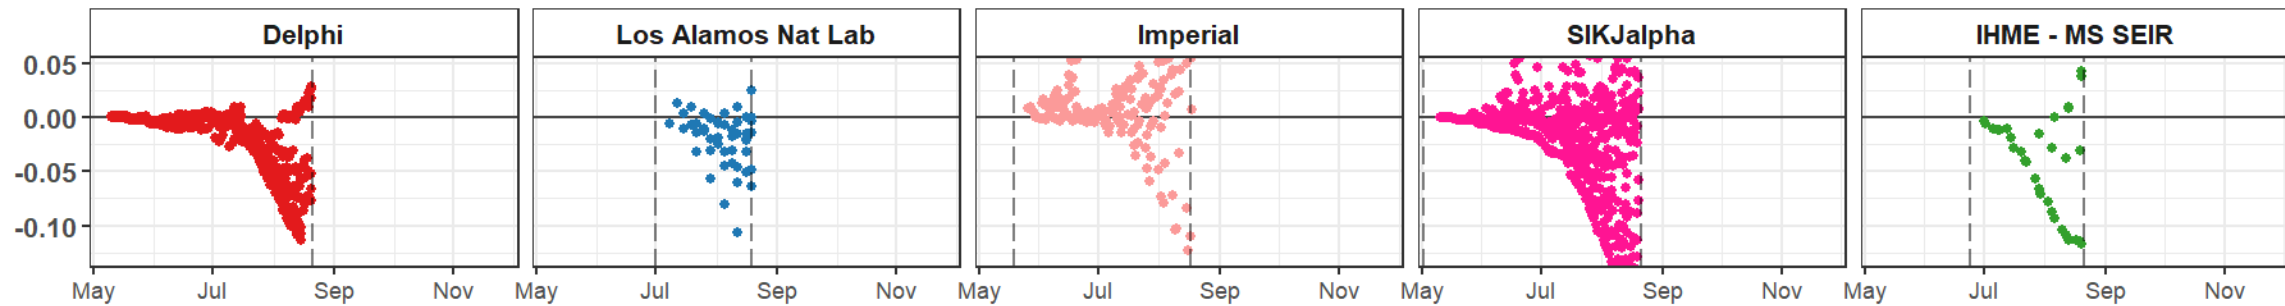



# Libya

## Current Forecast

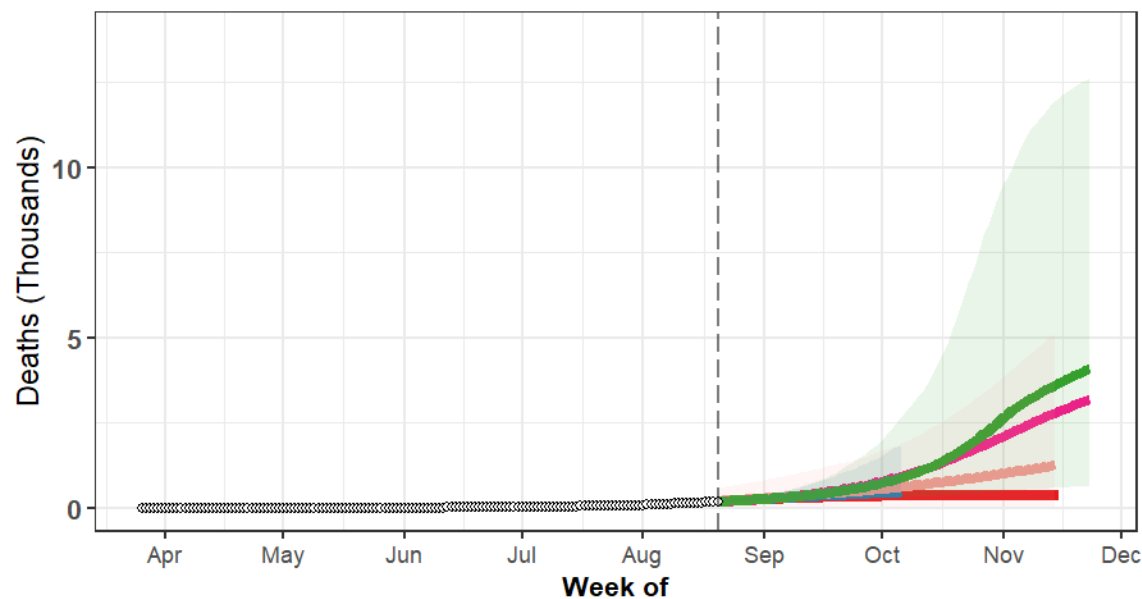

## Cumulative Out-Of-Sample Error (Post Intercept Shift)

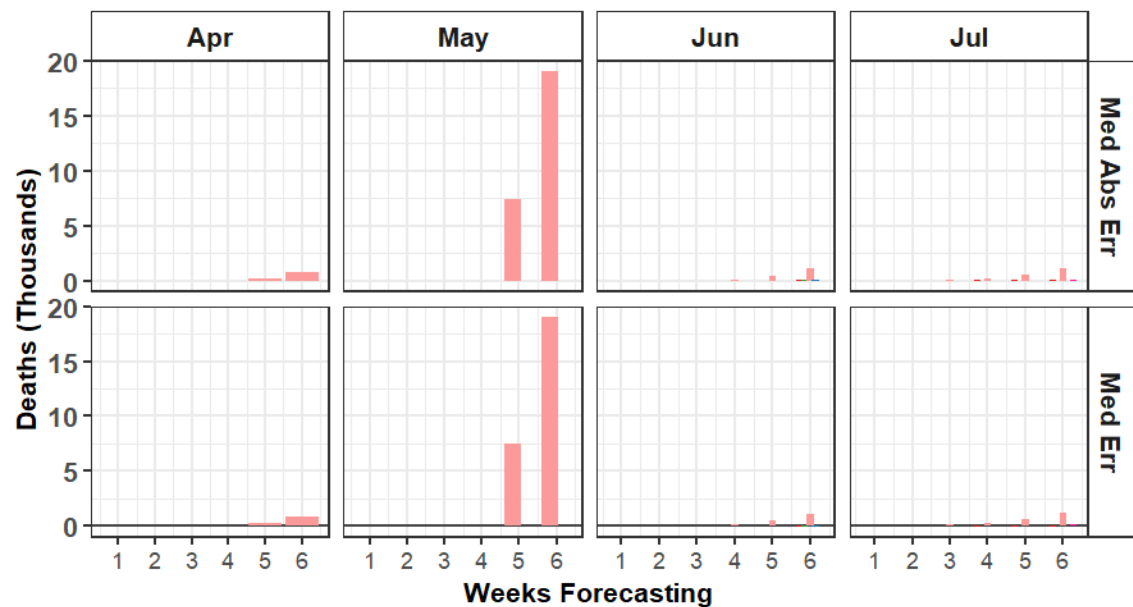

## All Model Versions

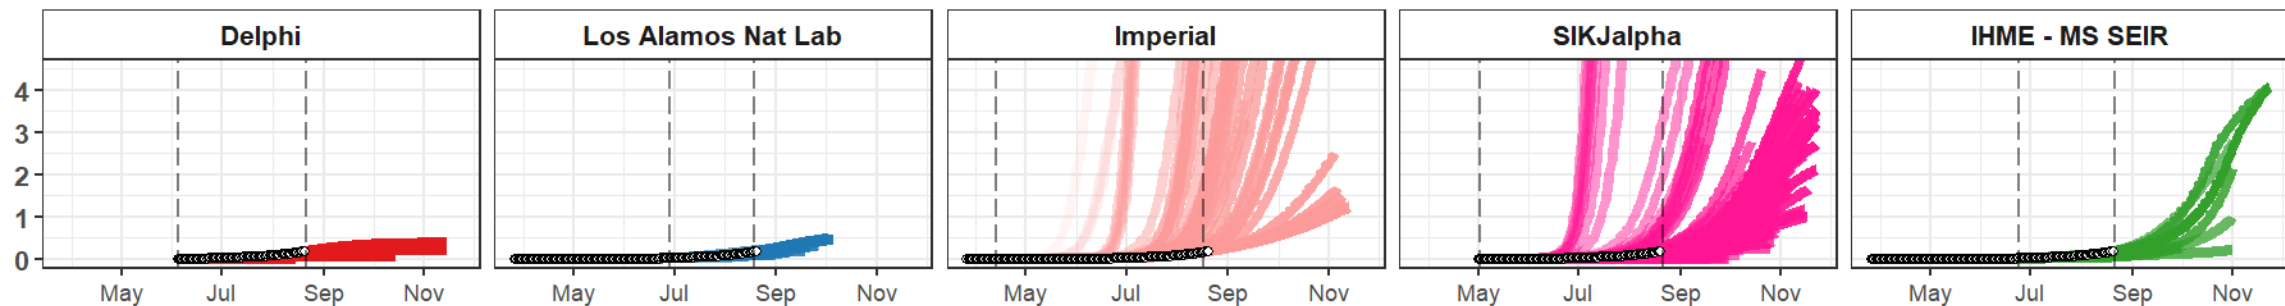

## All Cumulative Errors

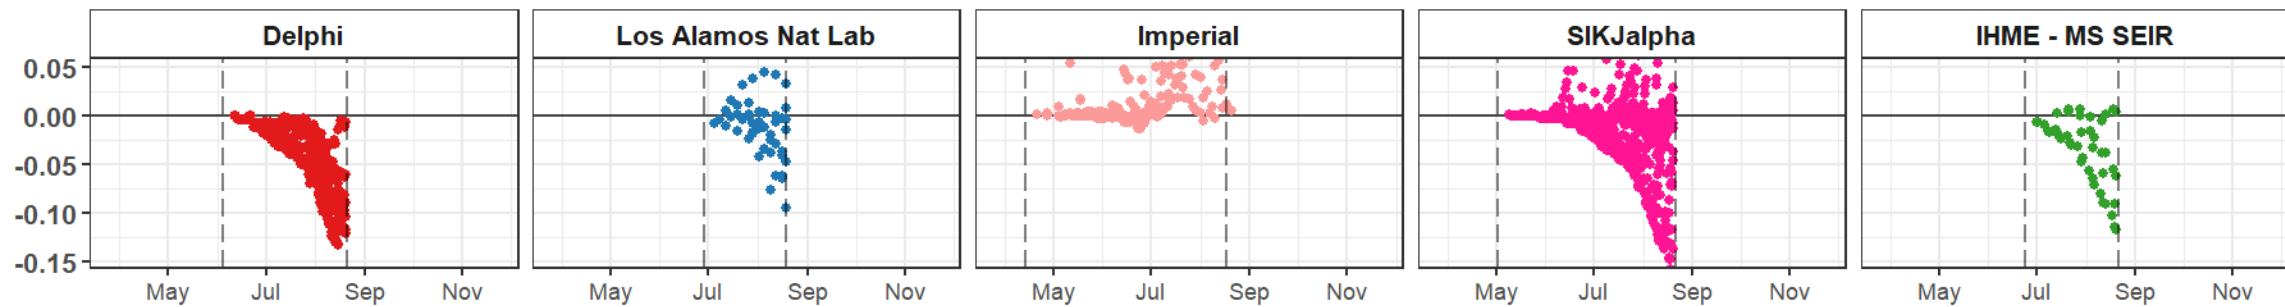

# Paraguay

## Current Forecast

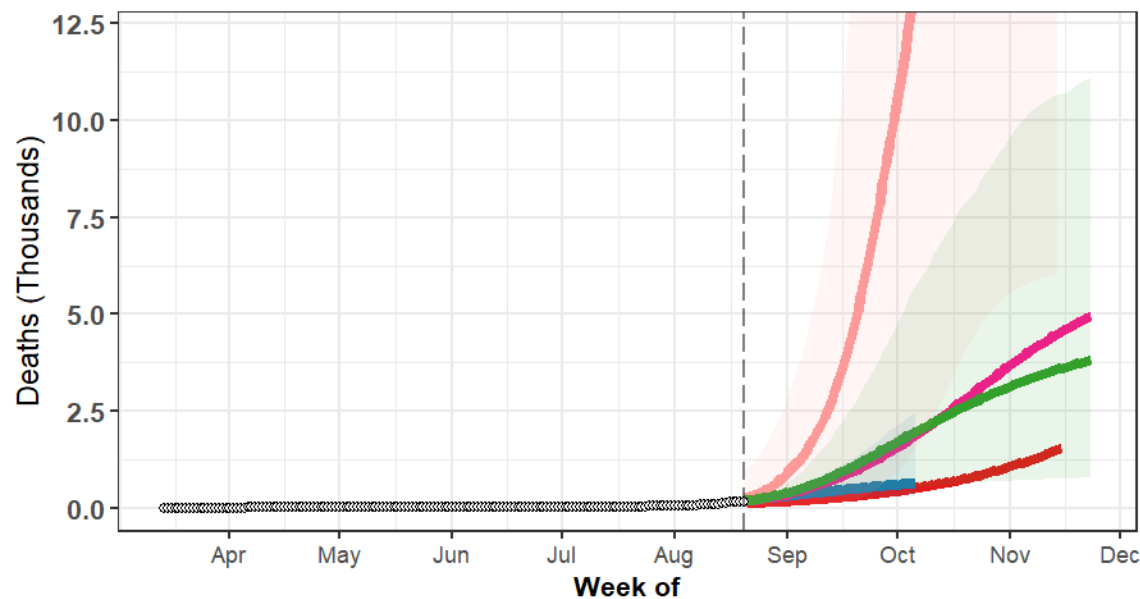

## Cumulative Out-Of-Sample Error (Post Intercept Shift)

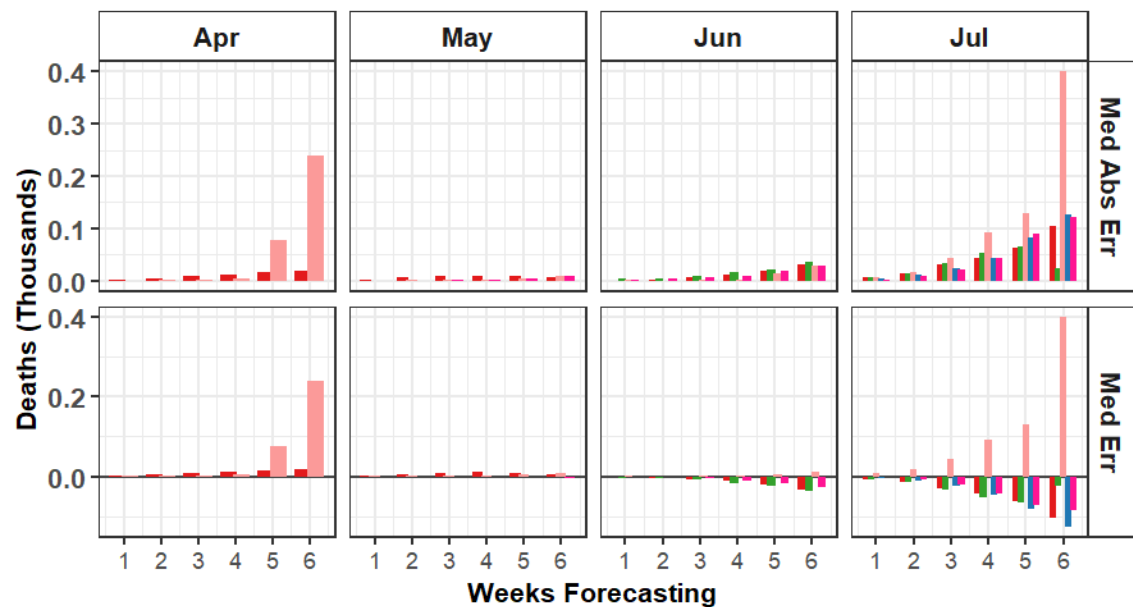

## All Model Versions

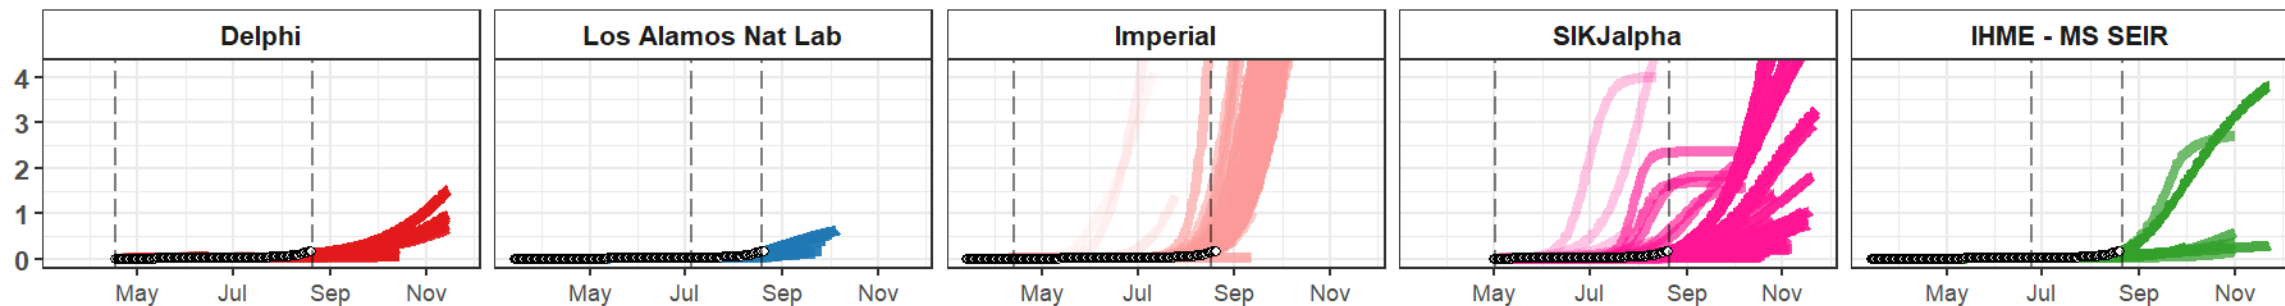

## All Cumulative Errors

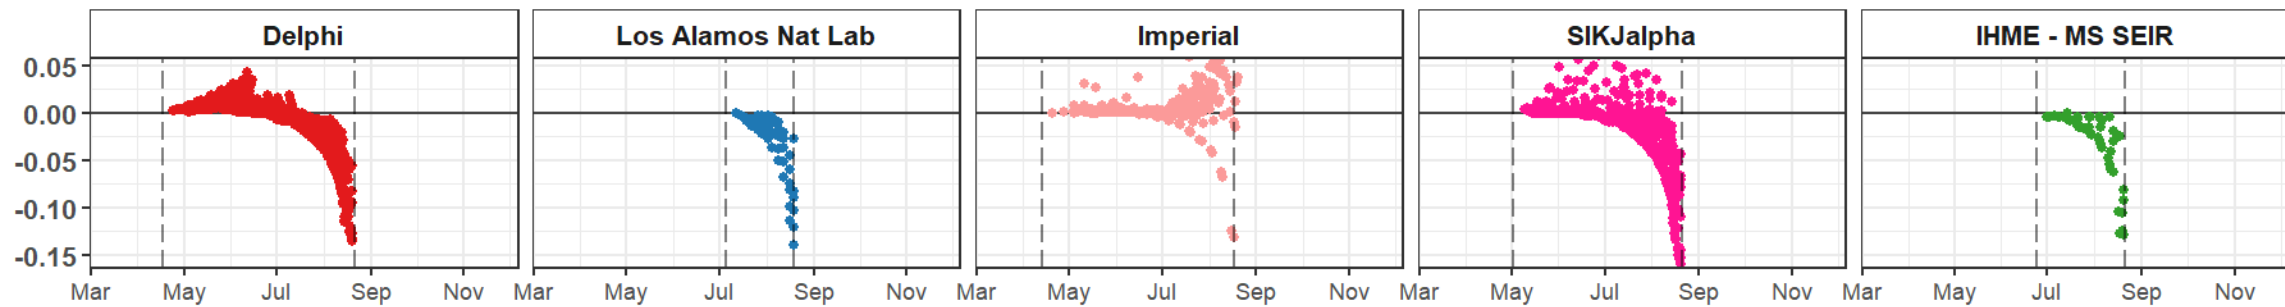

# West Virginia

## Current Forecast

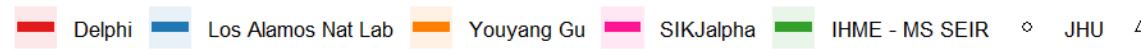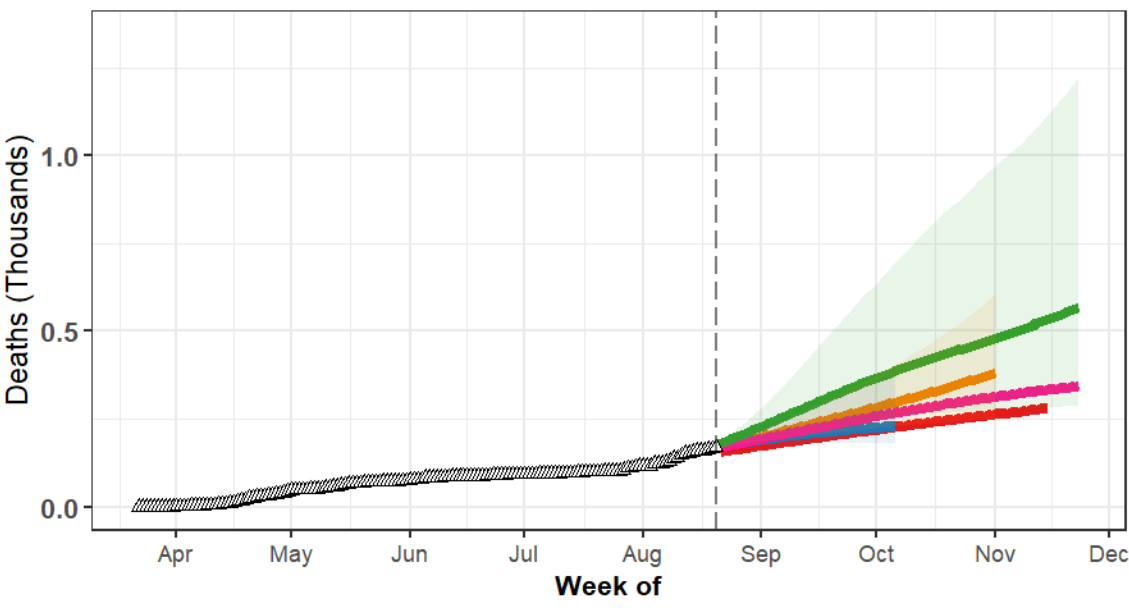

## Cumulative Out-Of-Sample Error (Post Intercept Shift)

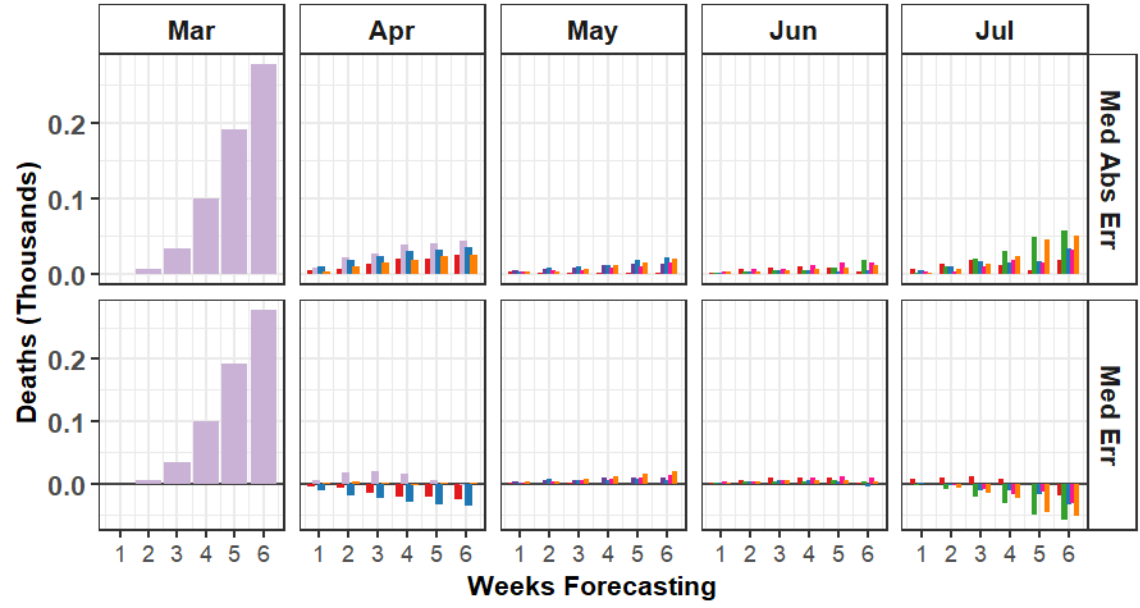

## All Model Versions

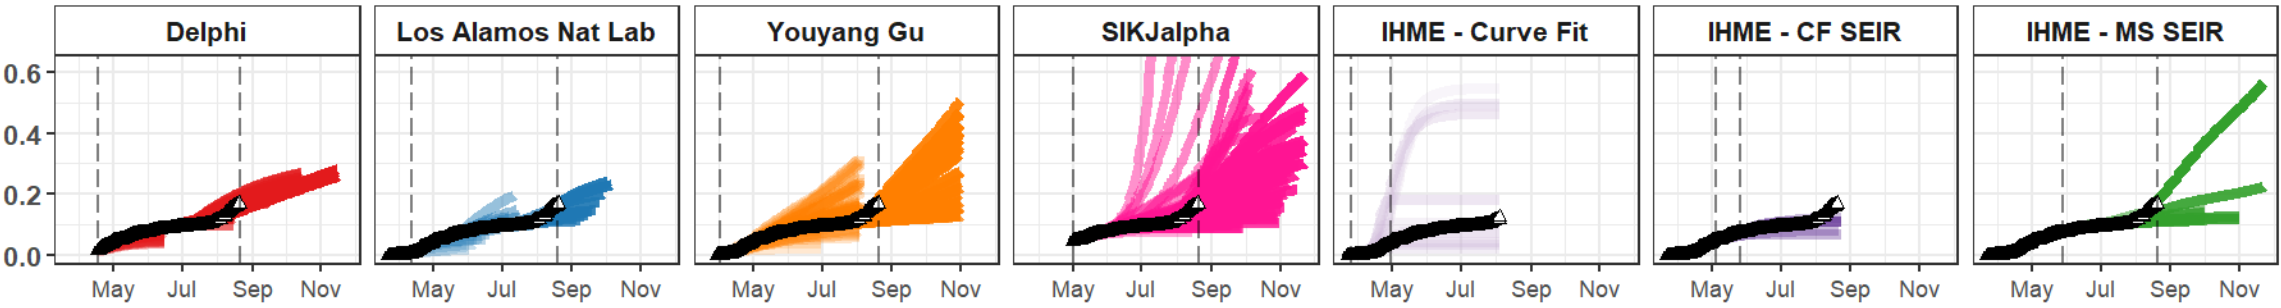

## All Cumulative Errors

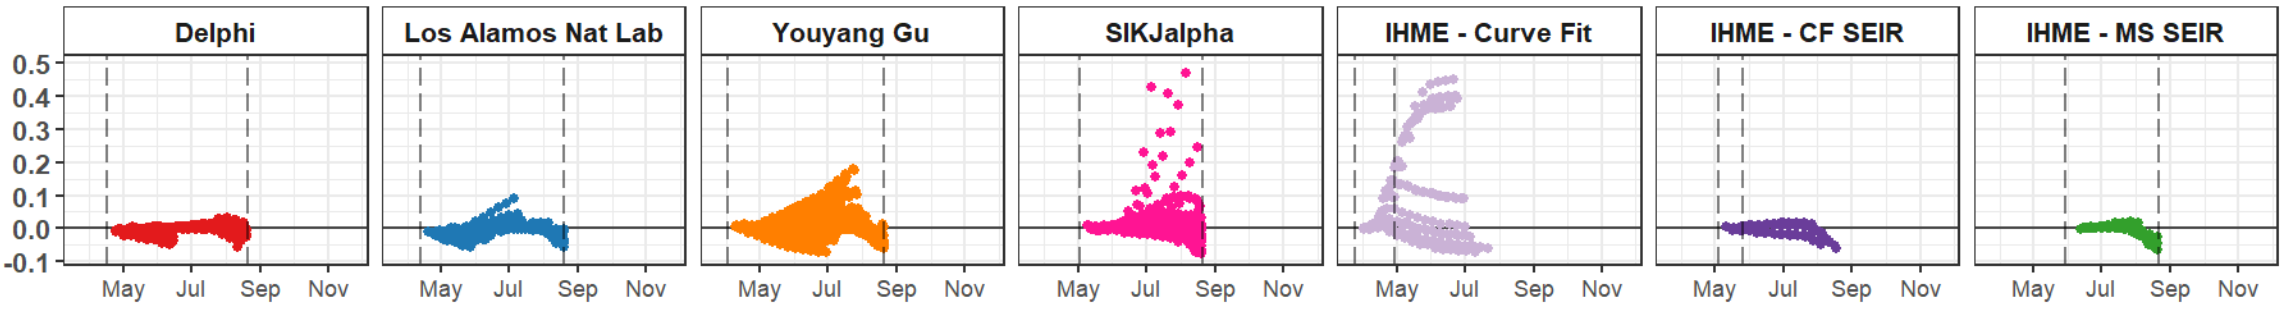

# Croatia

## Current Forecast

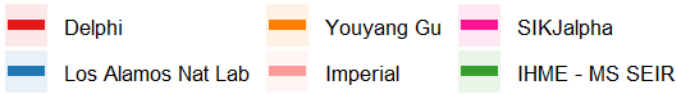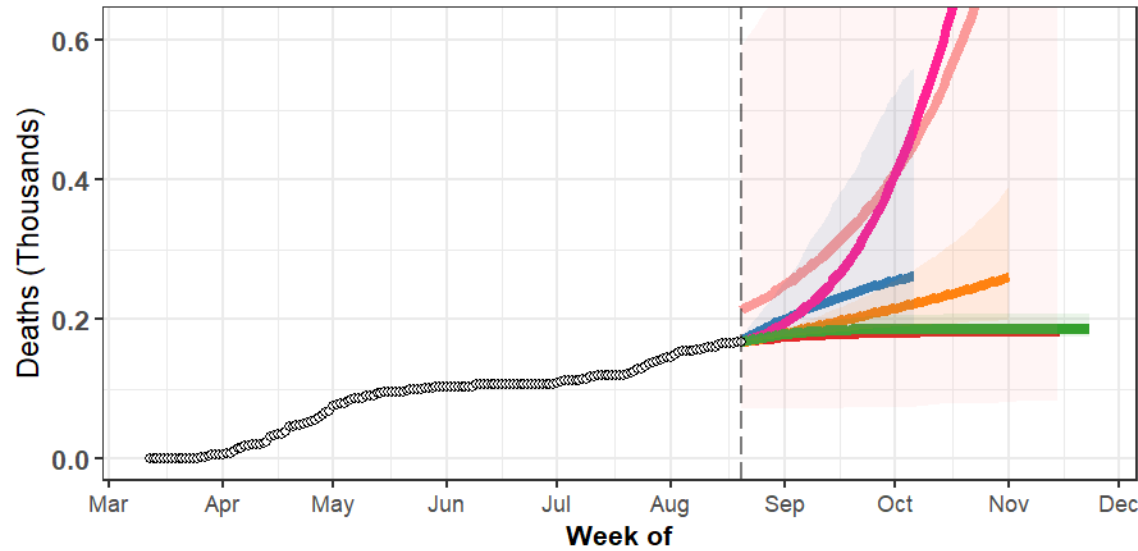

## Cumulative Out-Of-Sample Error (Post Intercept Shift)

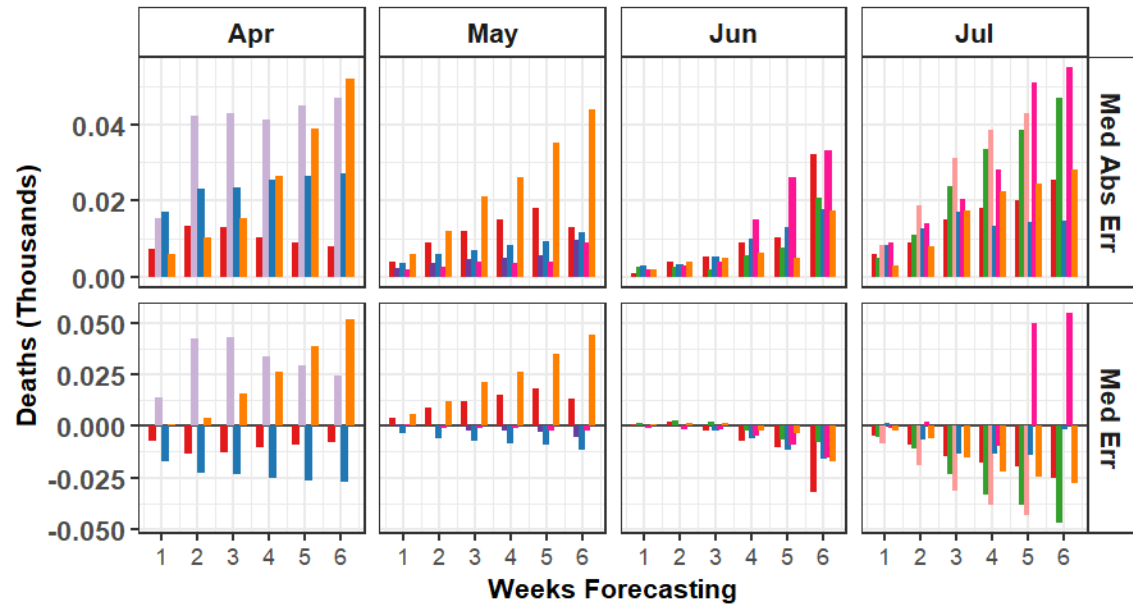

## All Model Versions

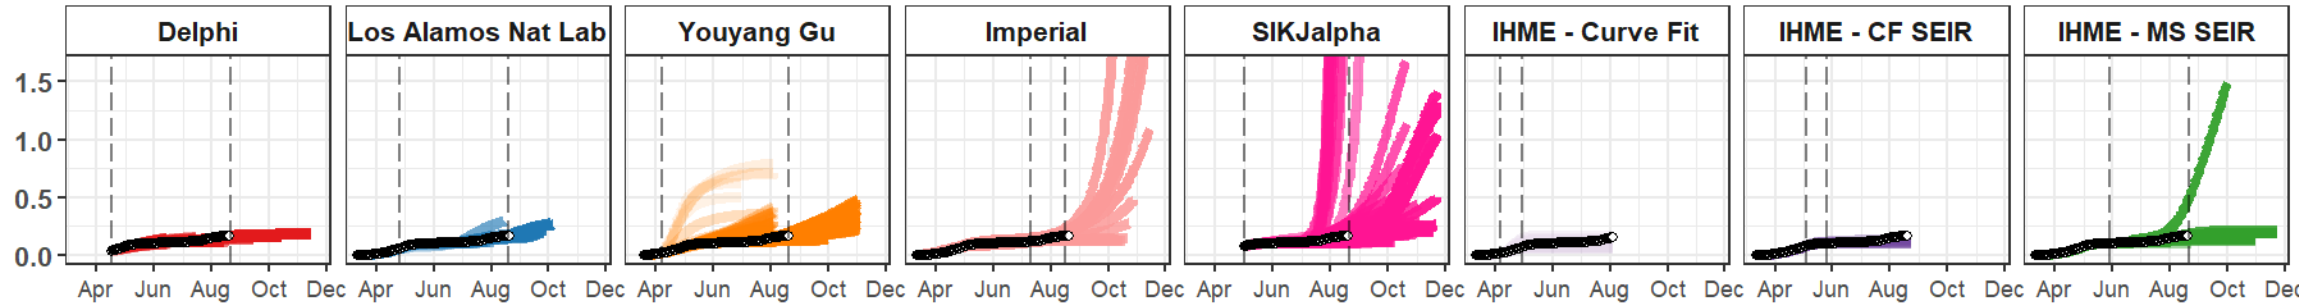

## All Cumulative Errors

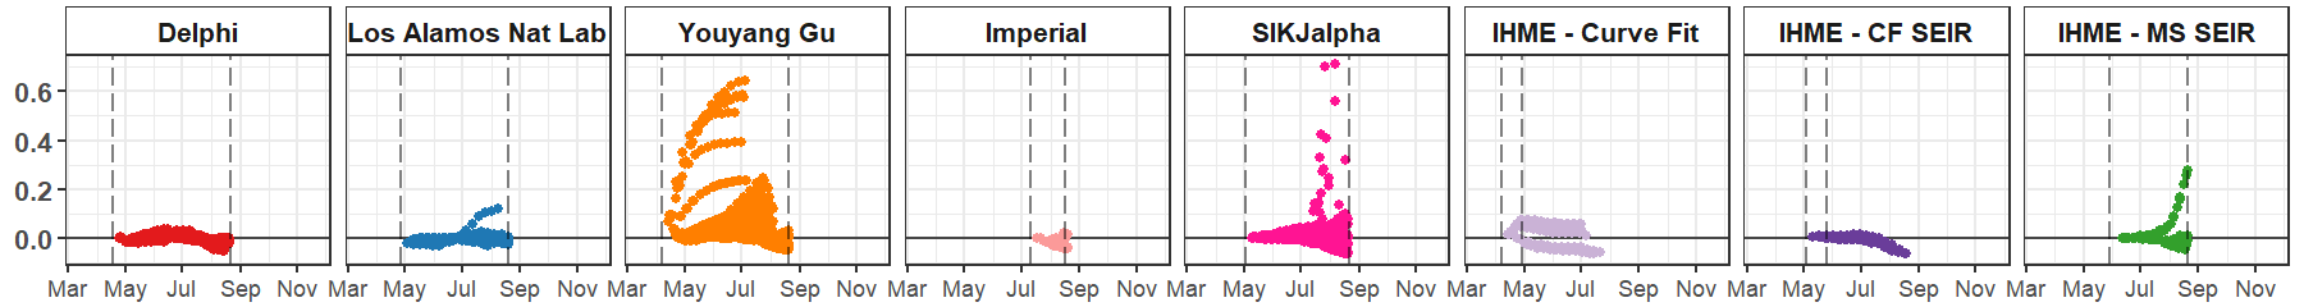

# Malawi

## Current Forecast

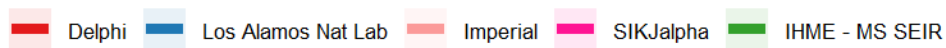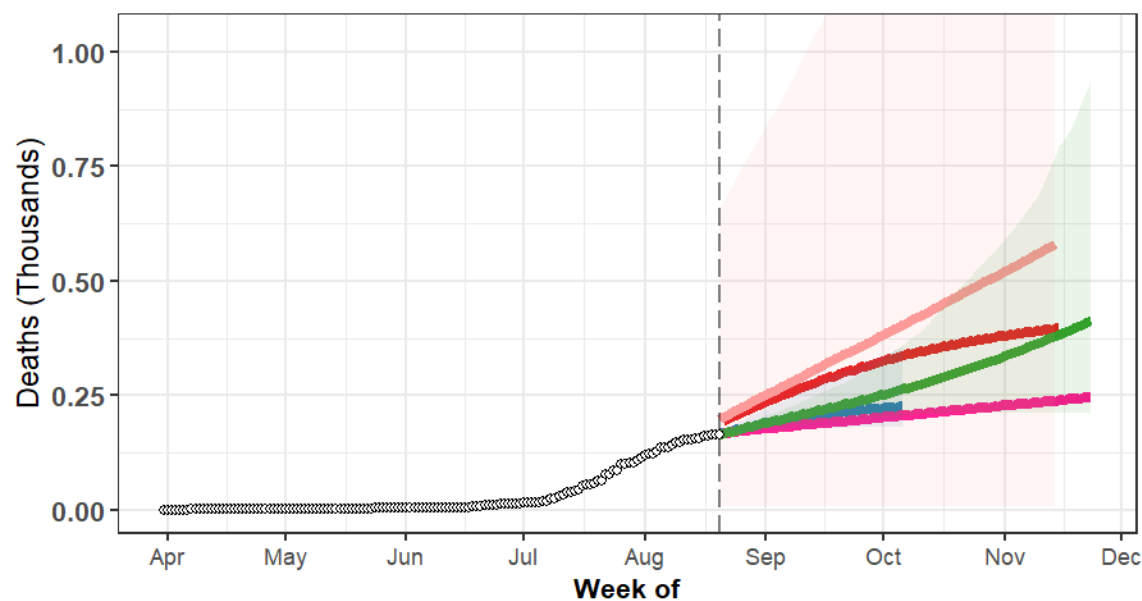

## Cumulative Out-Of-Sample Error (Post Intercept Shift)

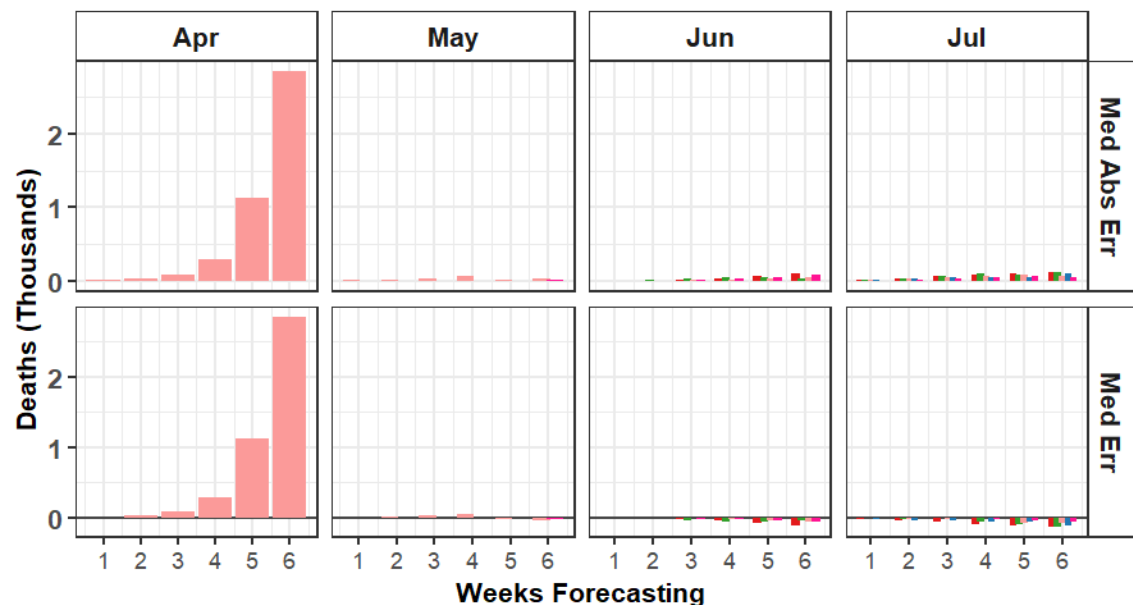

## All Model Versions

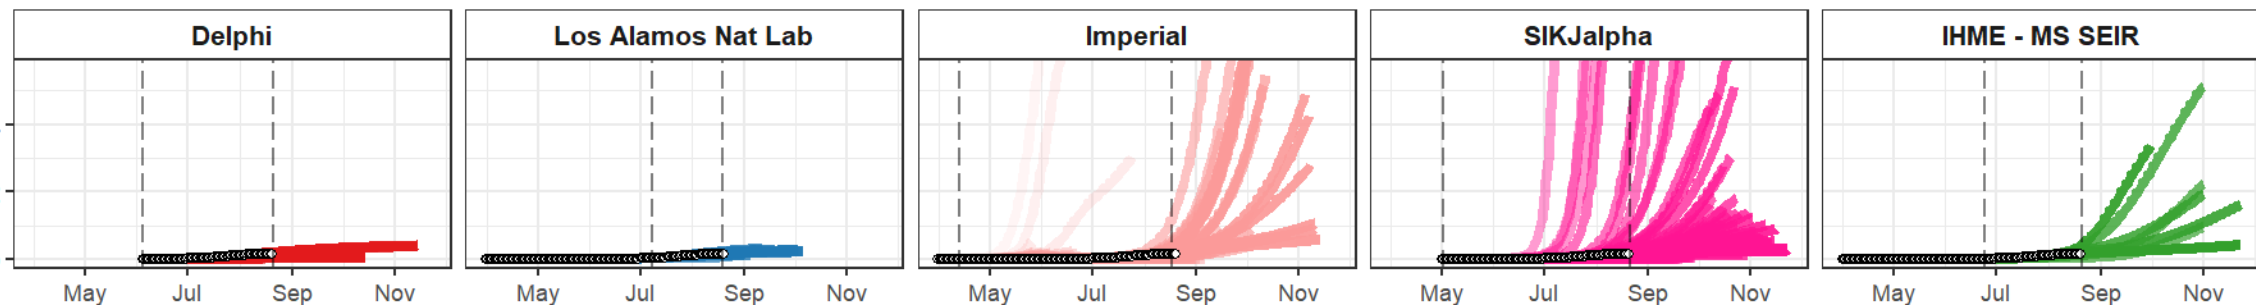

## All Cumulative Errors

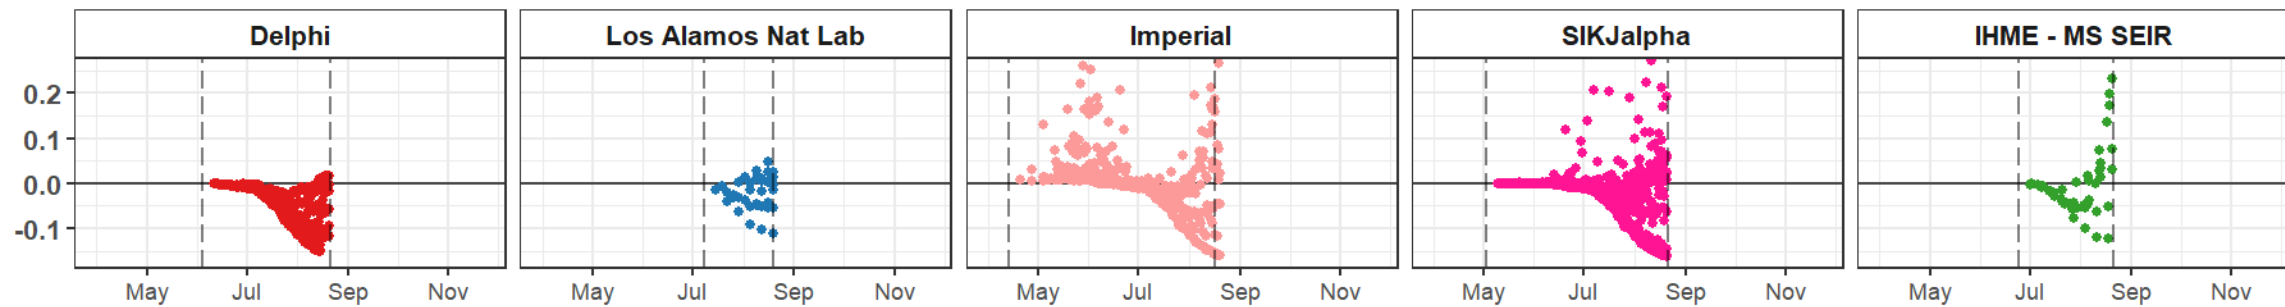

# Mauritania

## Current Forecast

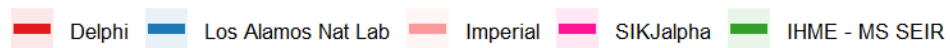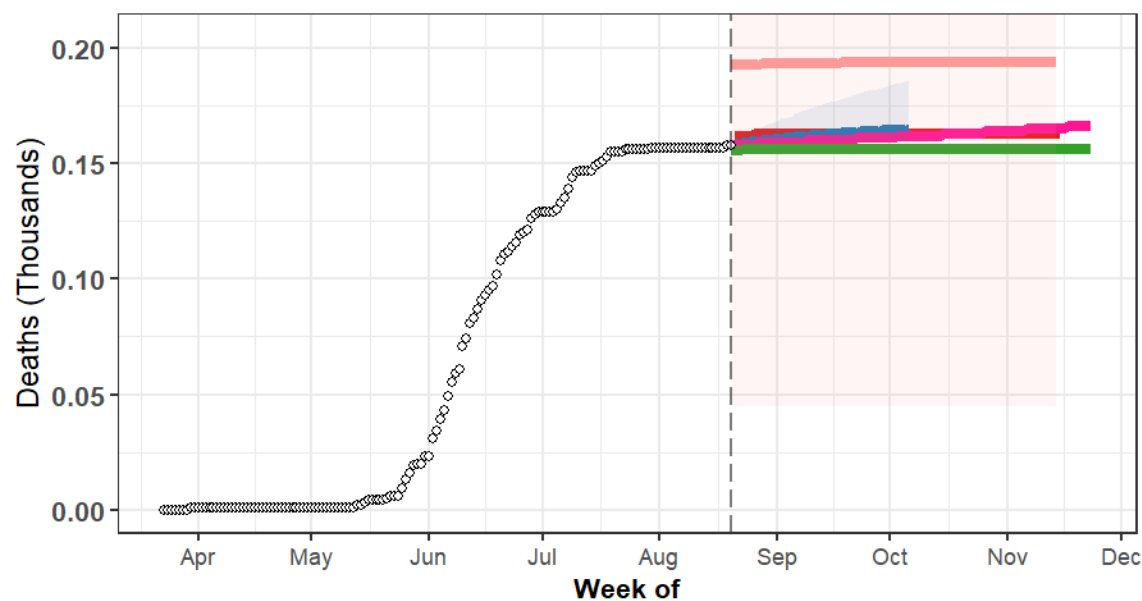

## Cumulative Out-Of-Sample Error (Post Intercept Shift)

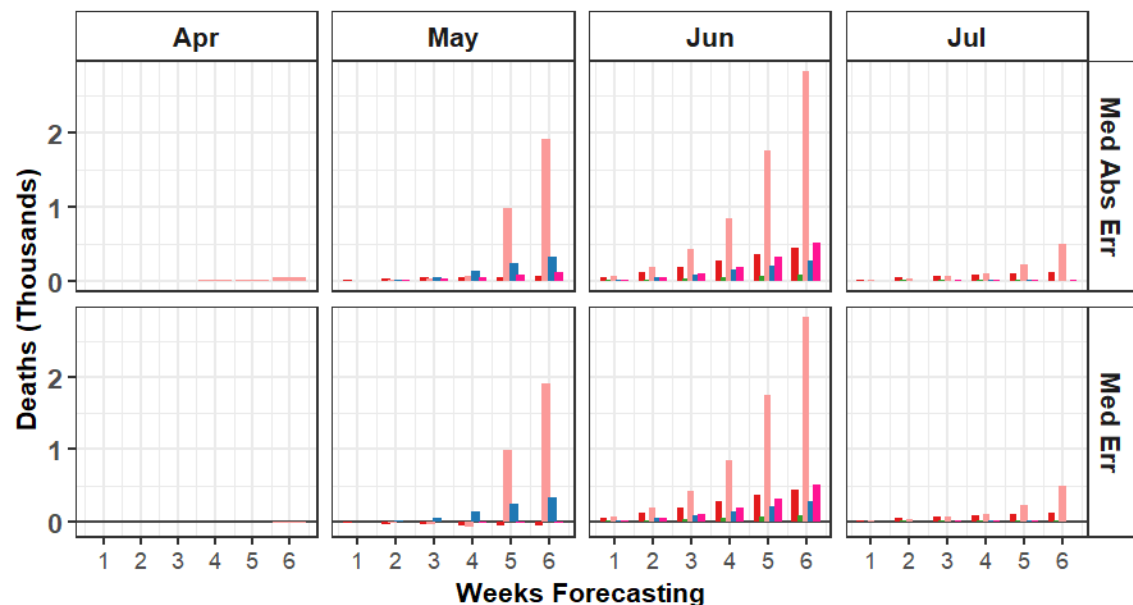

## All Model Versions

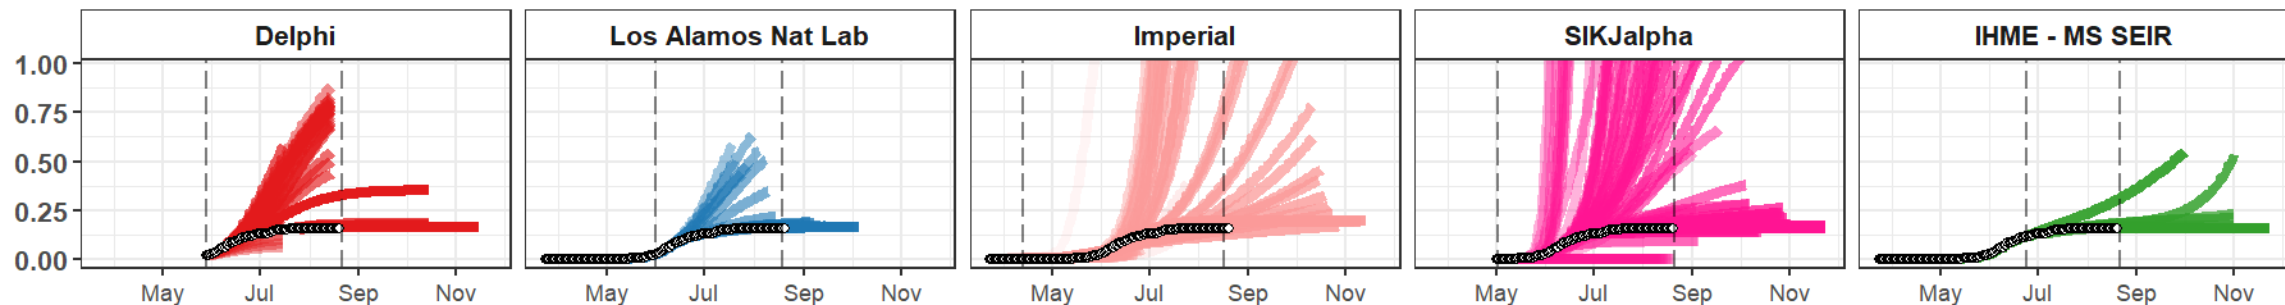

## All Cumulative Errors

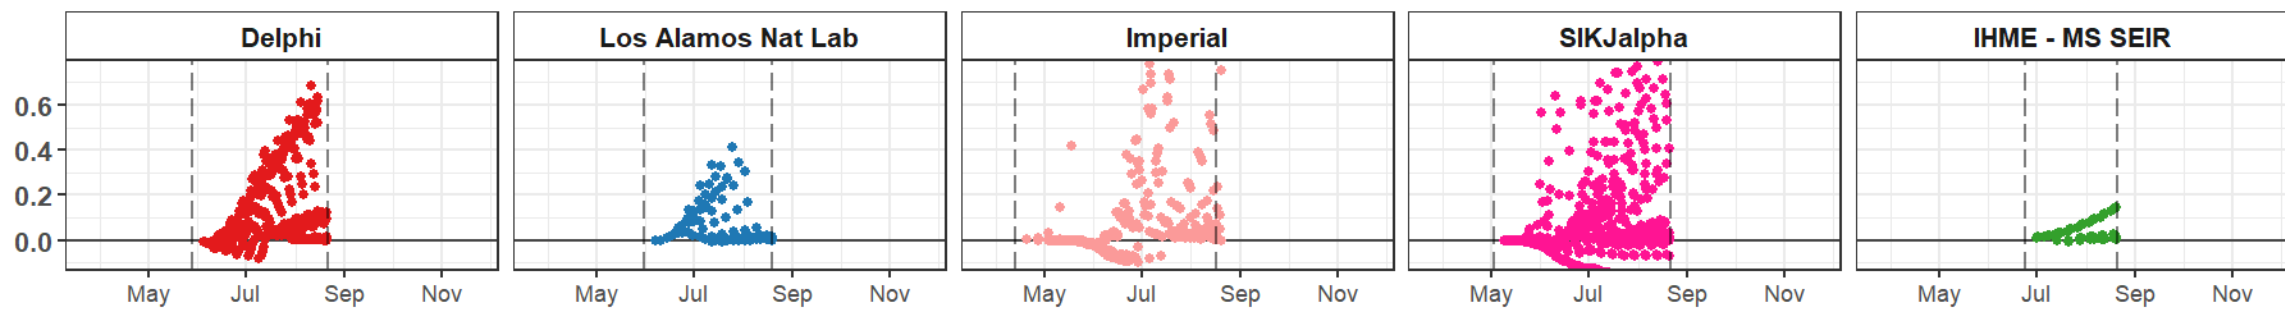

# South Dakota

## Current Forecast

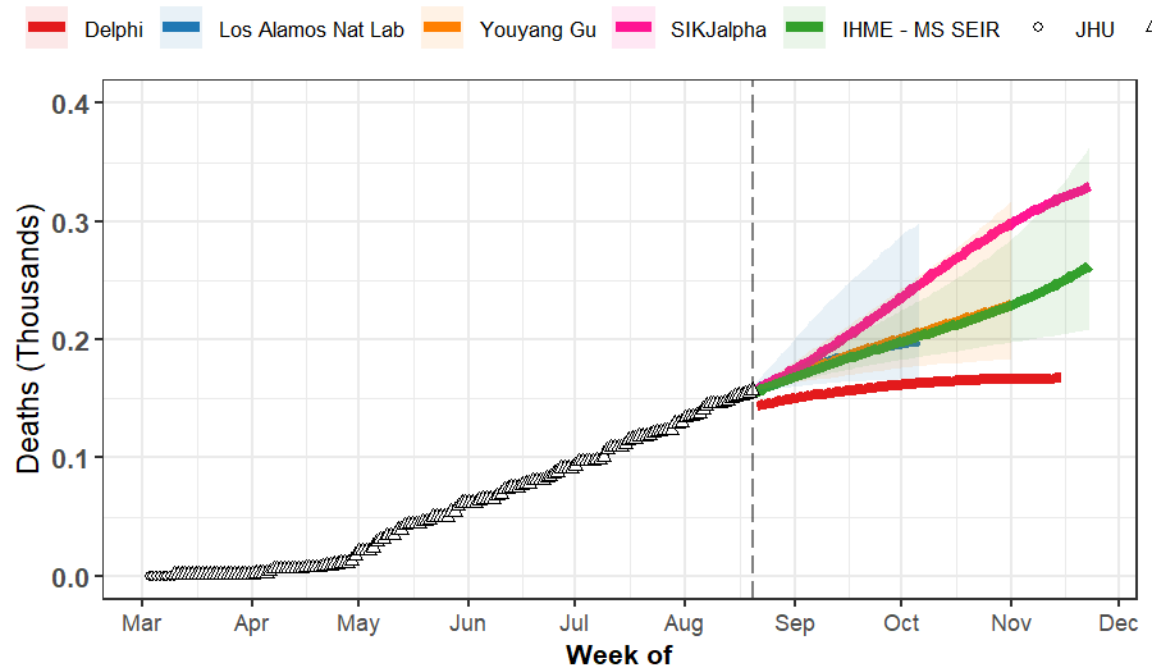

## Cumulative Out-Of-Sample Error (Post Intercept Shift)

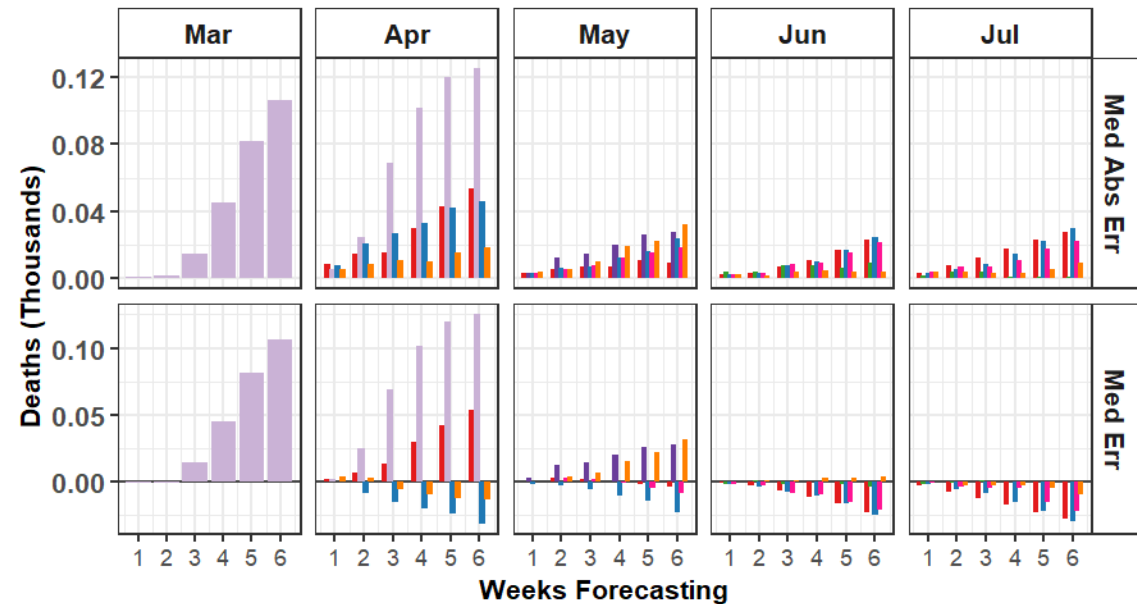

## All Model Versions

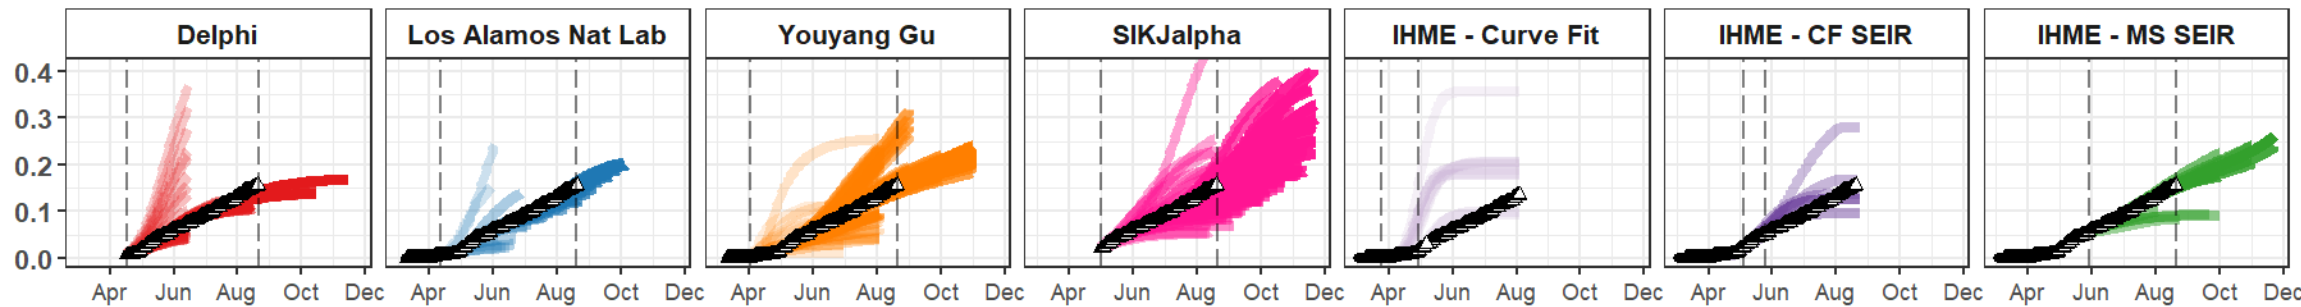

## All Cumulative Errors

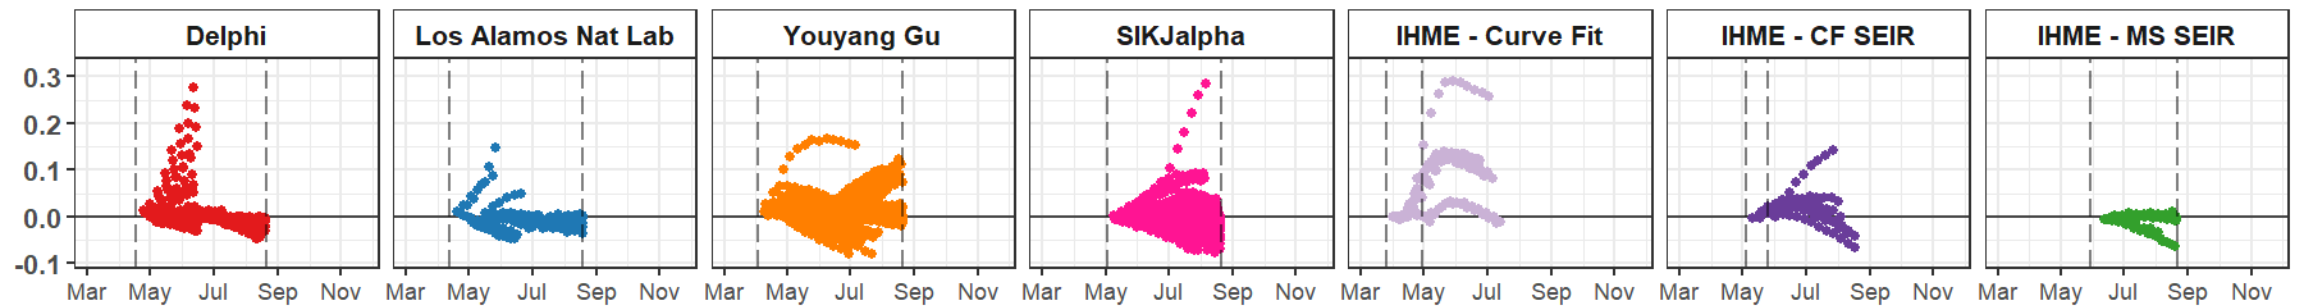

# Zimbabwe

## Current Forecast

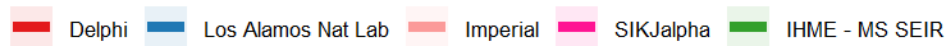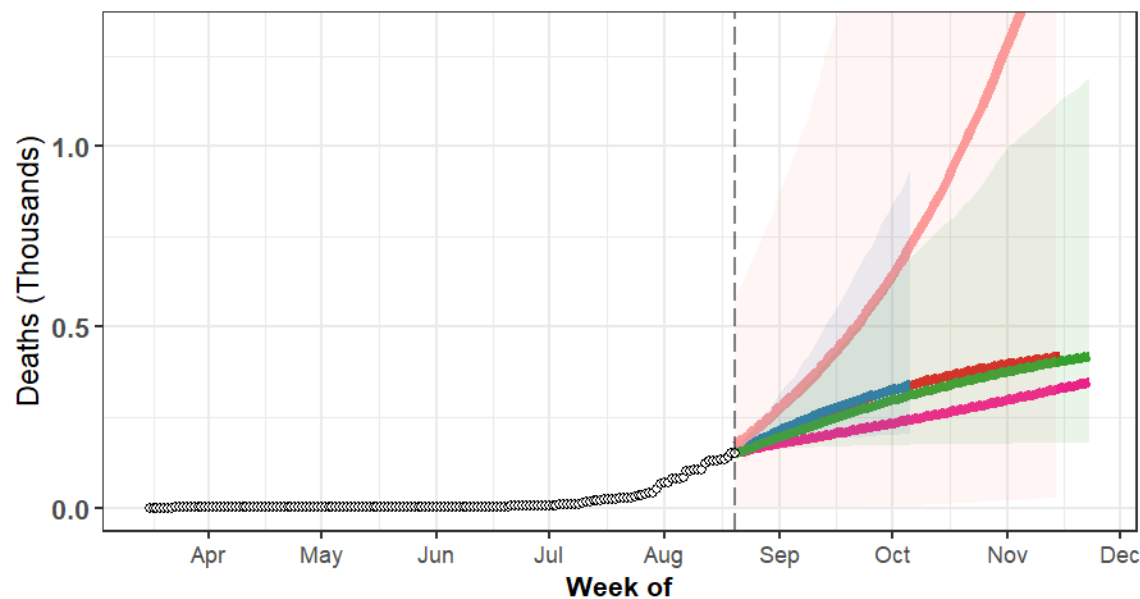

## Cumulative Out-Of-Sample Error (Post Intercept Shift)

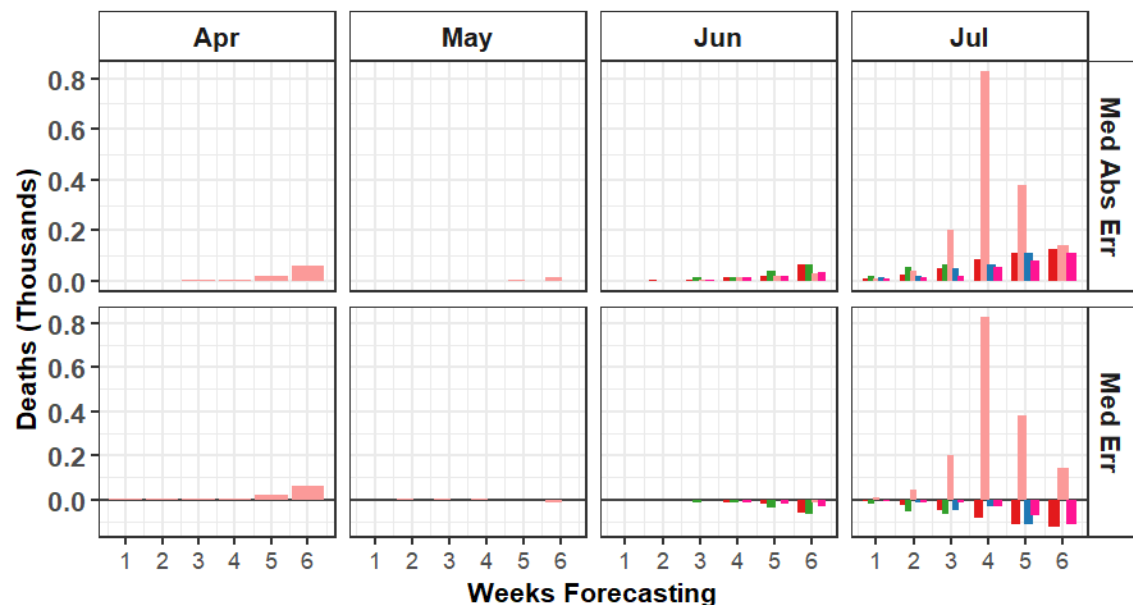

## All Model Versions

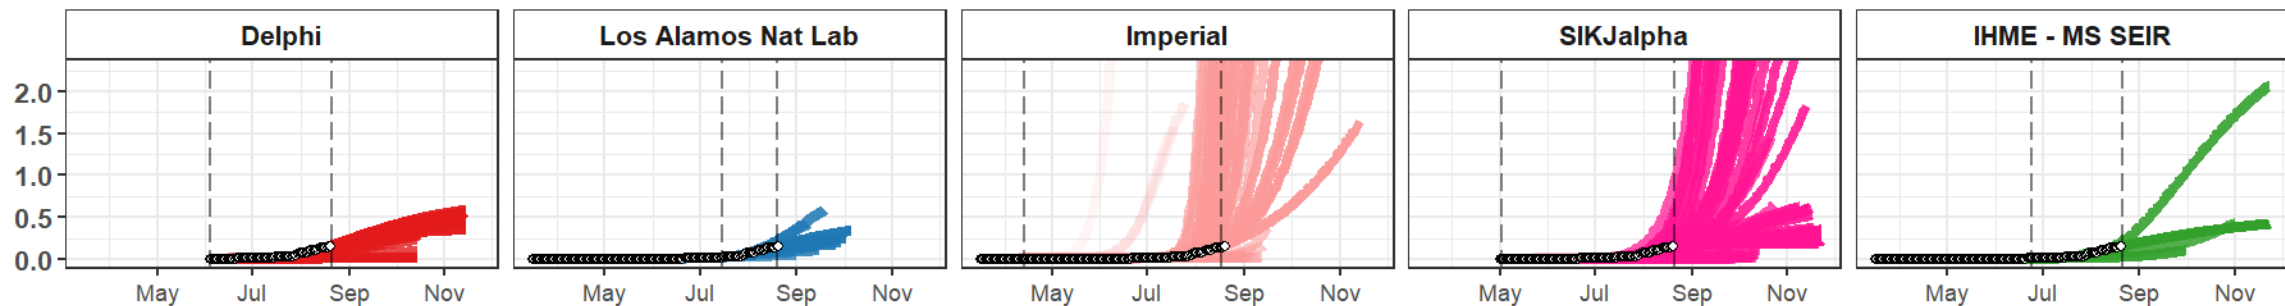

## All Cumulative Errors

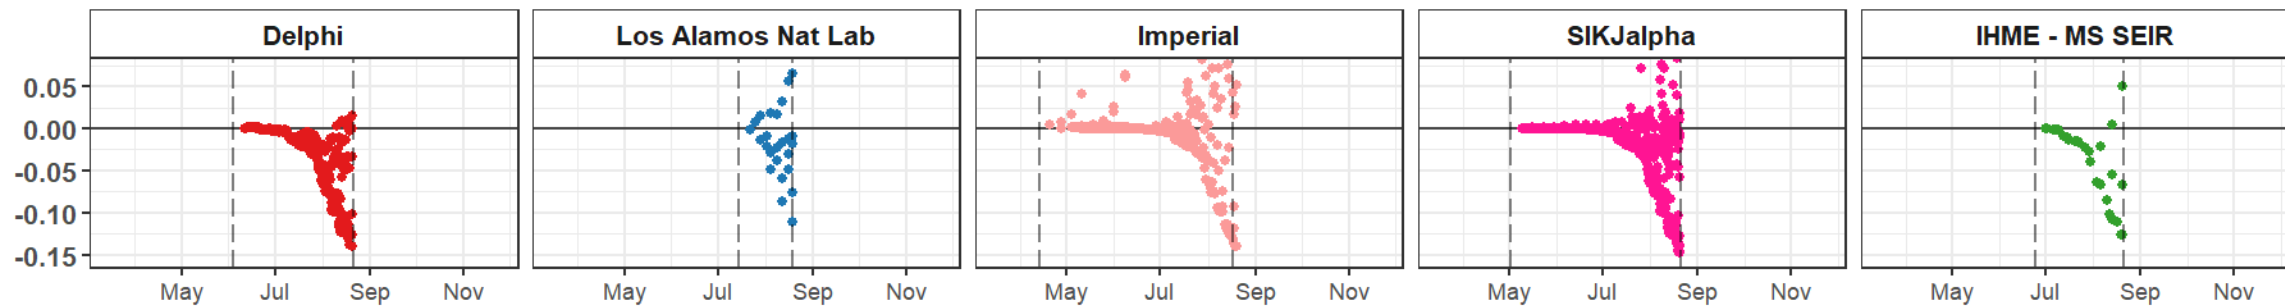



# North Dakota

## Current Forecast

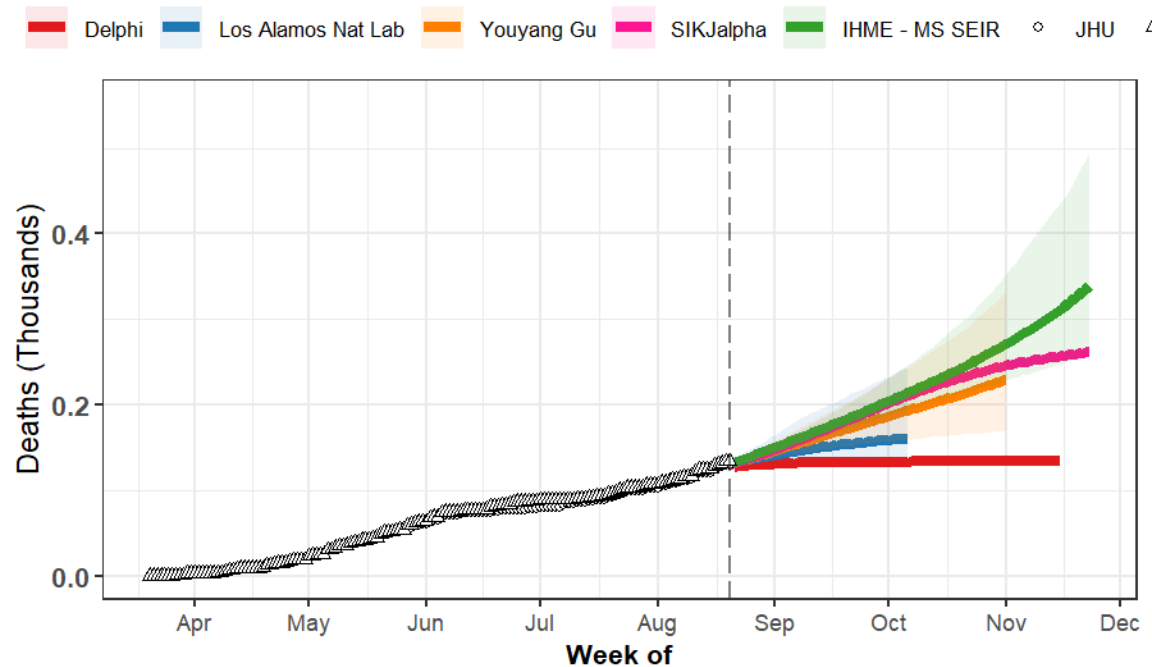

## Cumulative Out-Of-Sample Error (Post Intercept Shift)

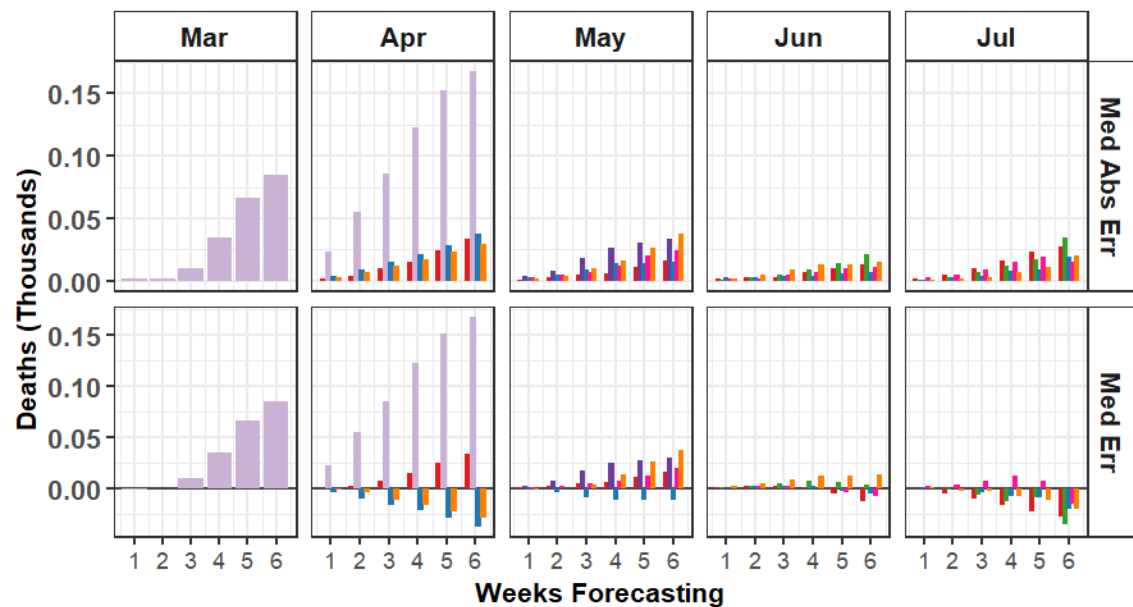

## All Model Versions

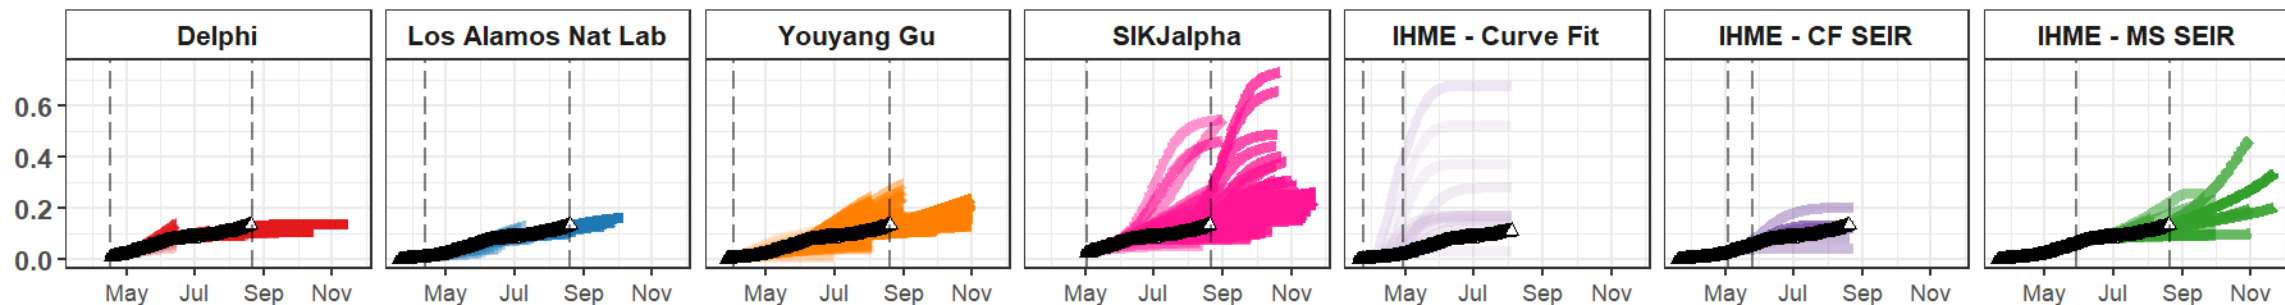

## All Cumulative Errors

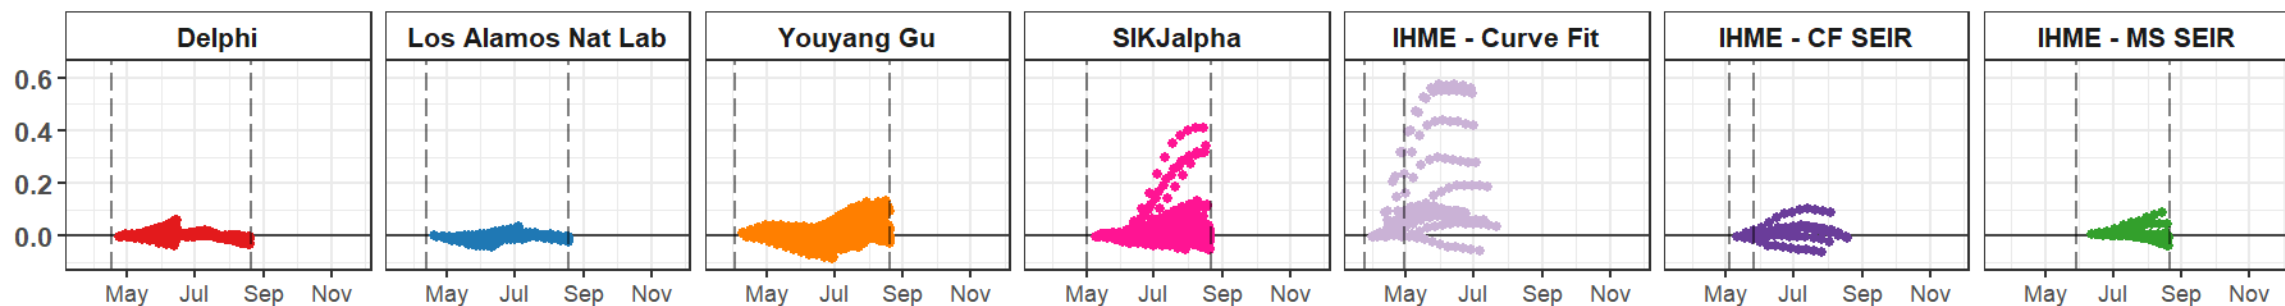

# Nicaragua

## Current Forecast

Delphi Los Alamos Nat Lab Imperial SIKJalpha IHME - MS SEIR

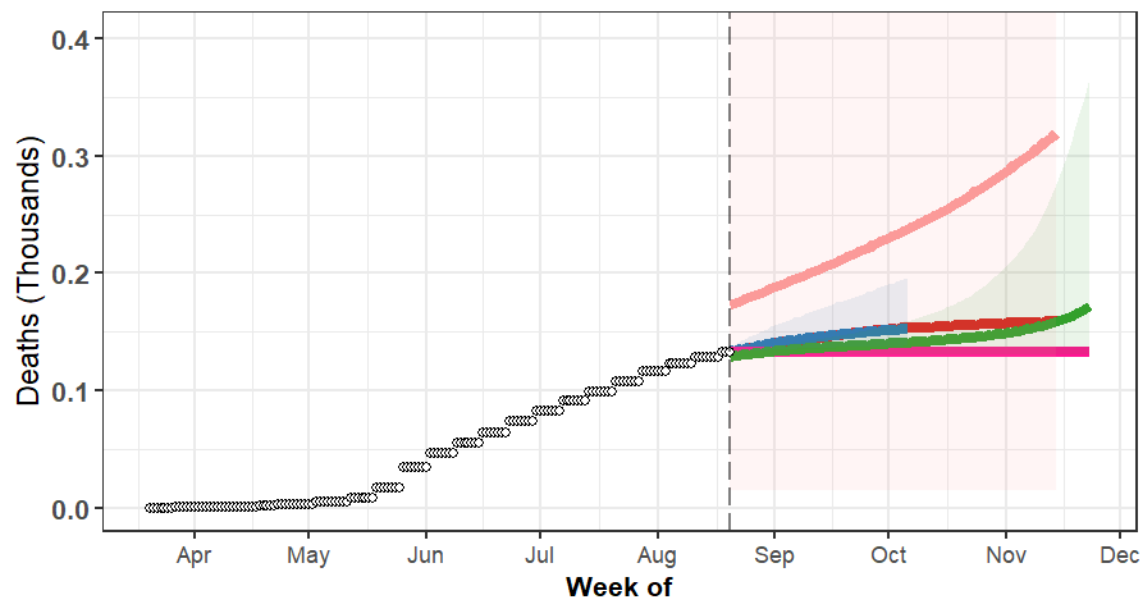

## Cumulative Out-Of-Sample Error (Post Intercept Shift)

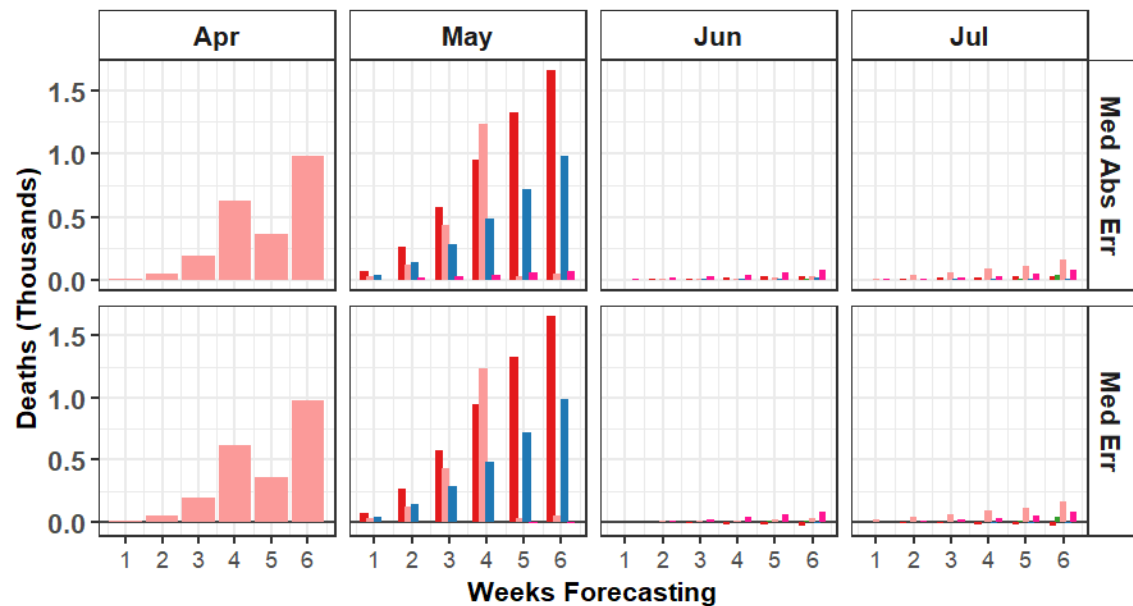

## All Model Versions

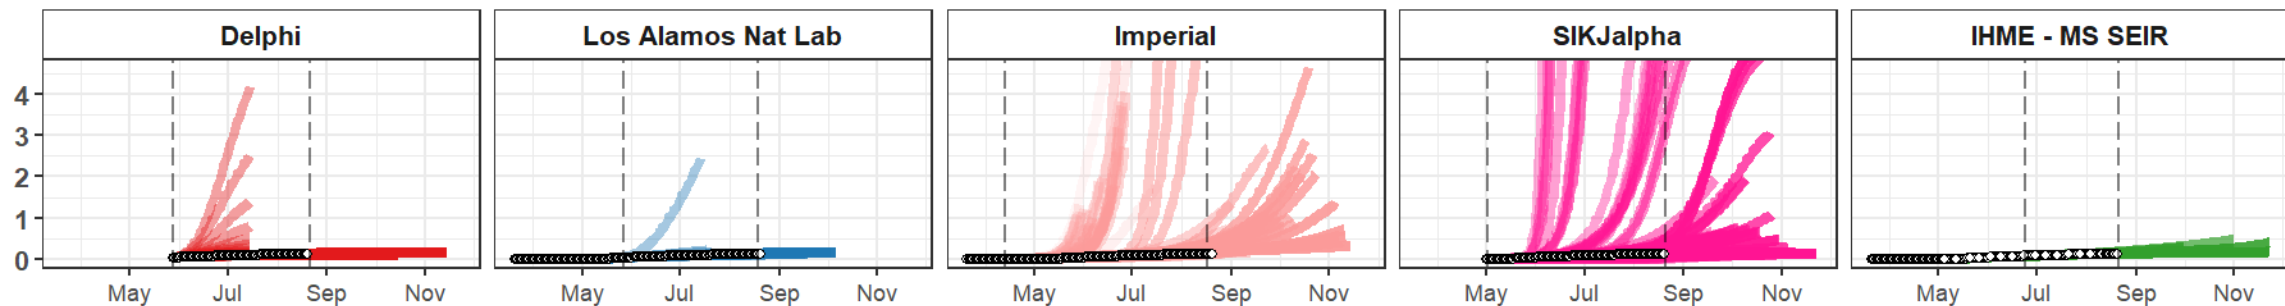

## All Cumulative Errors

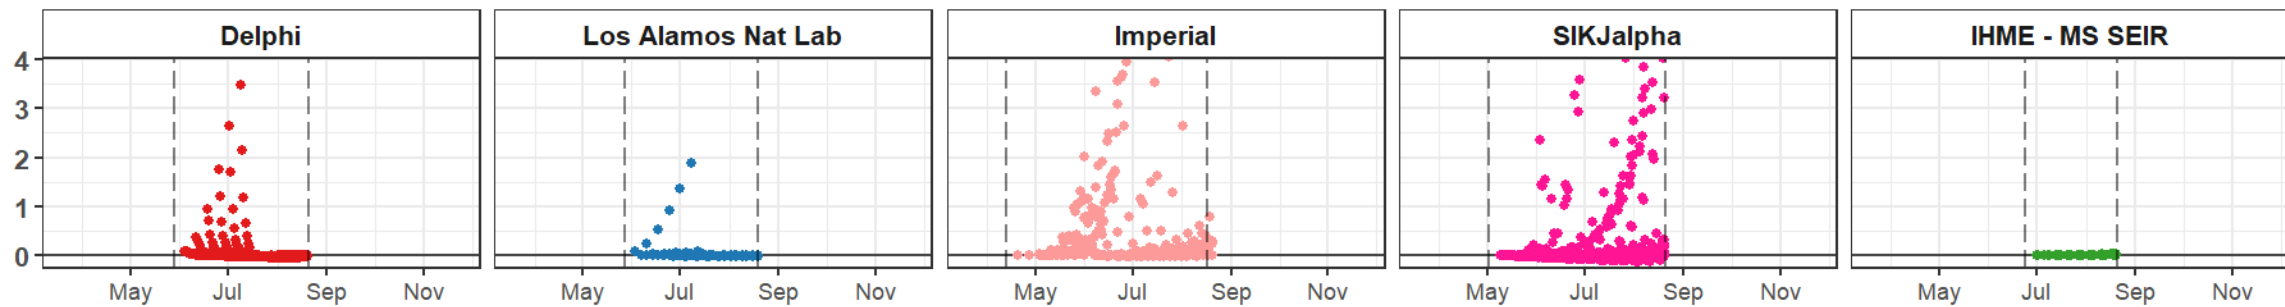

# Maine

## Current Forecast

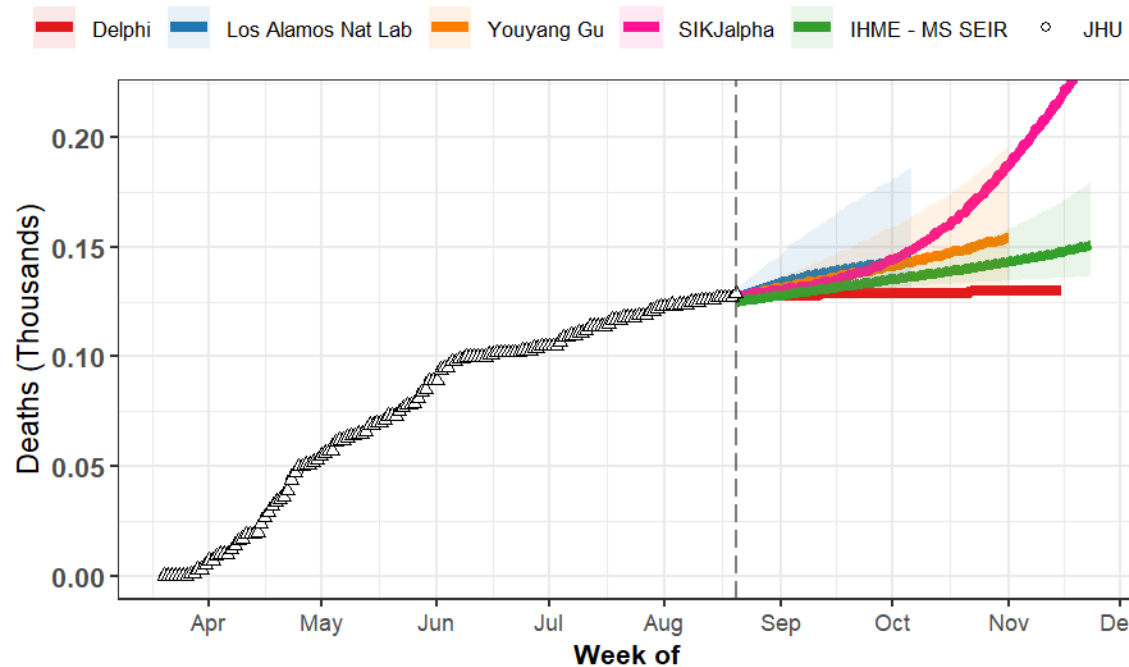

## Cumulative Out-Of-Sample Error (Post Intercept Shift)

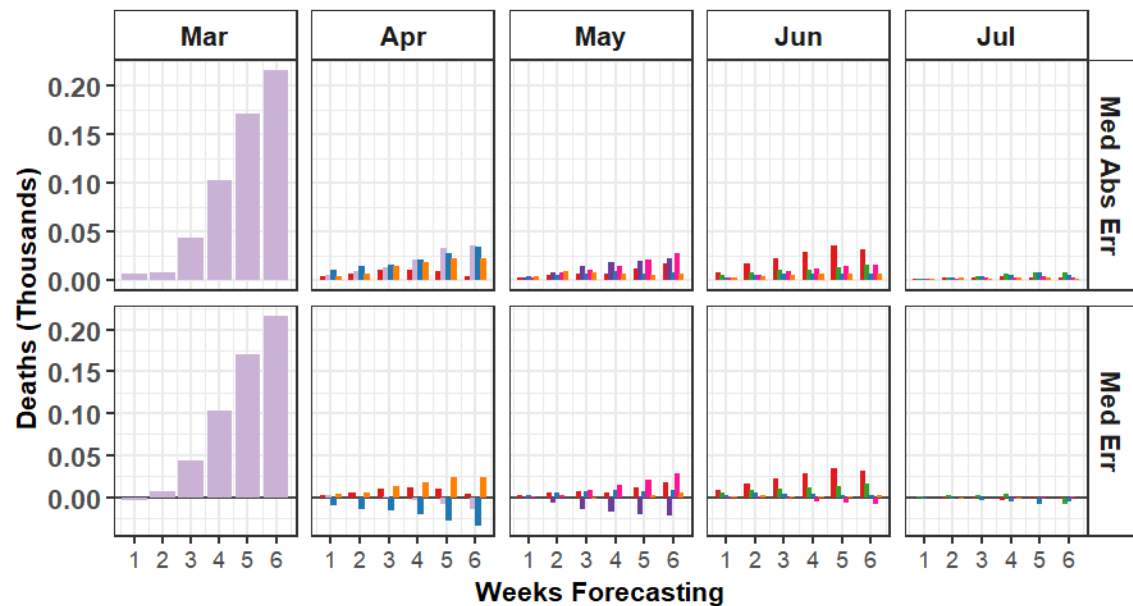

## All Model Versions

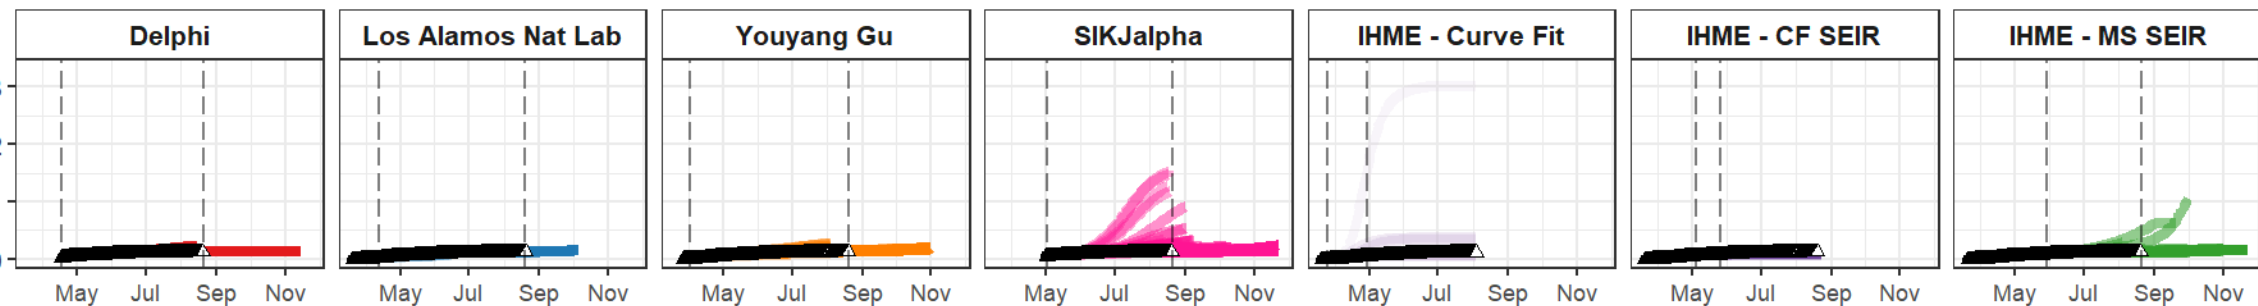

## All Cumulative Errors

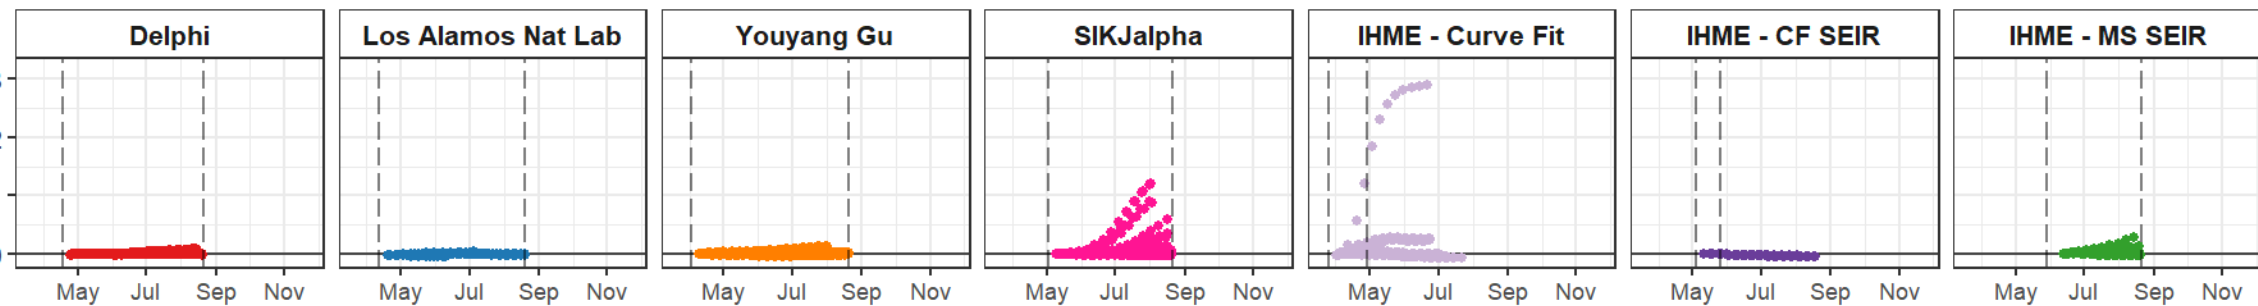

# Slovenia

## Current Forecast

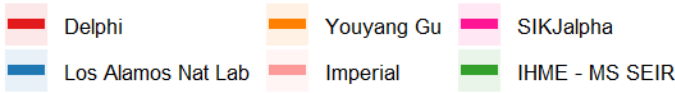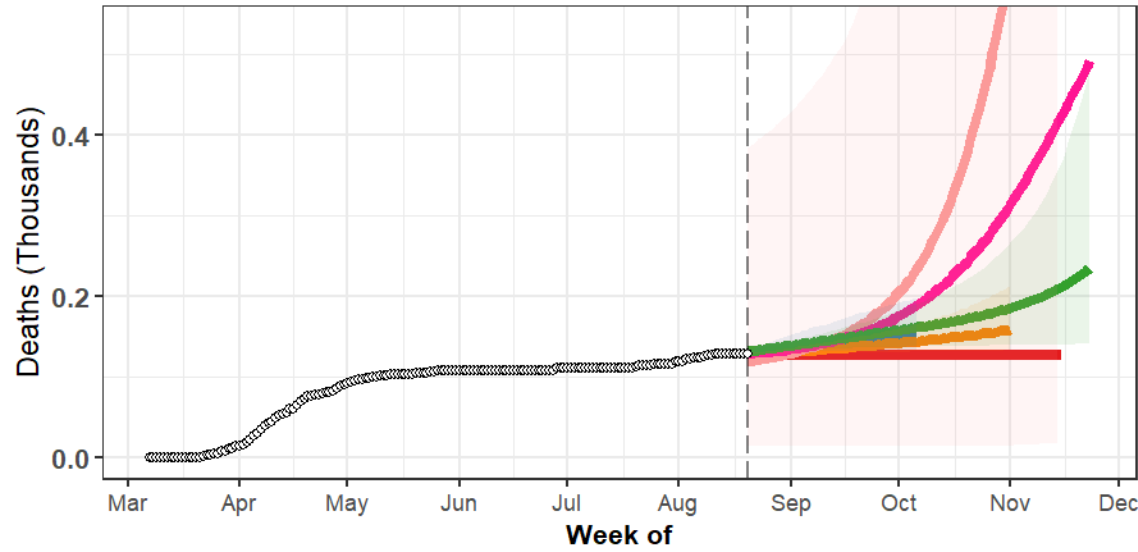

## Cumulative Out-Of-Sample Error (Post Intercept Shift)

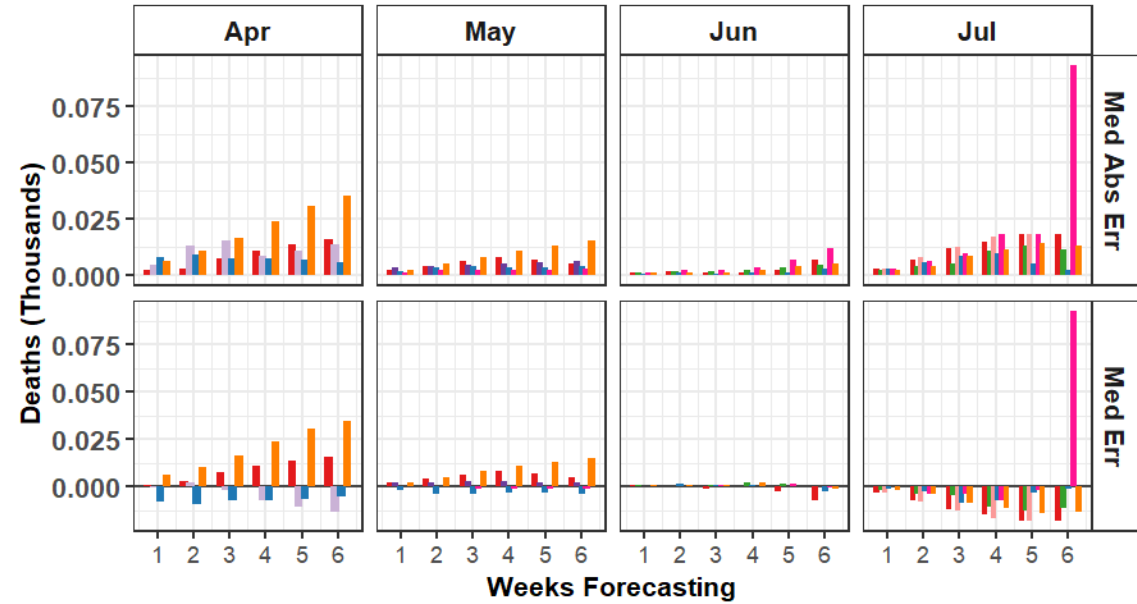

## All Model Versions

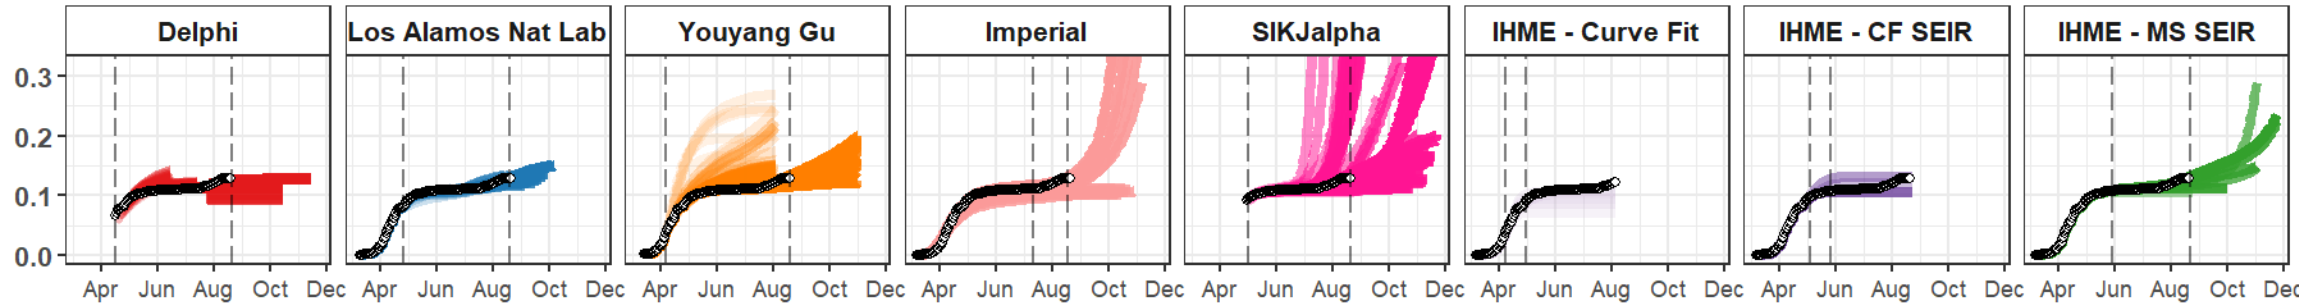

## All Cumulative Errors

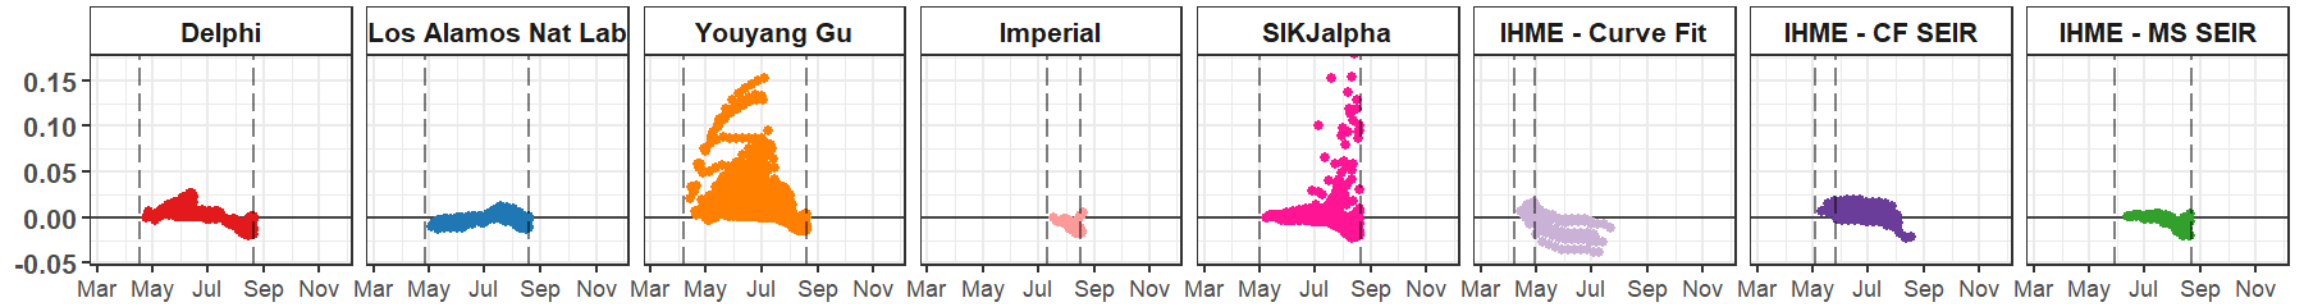

# Nepal

## Current Forecast

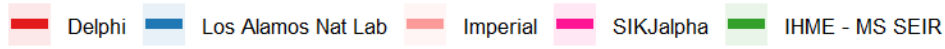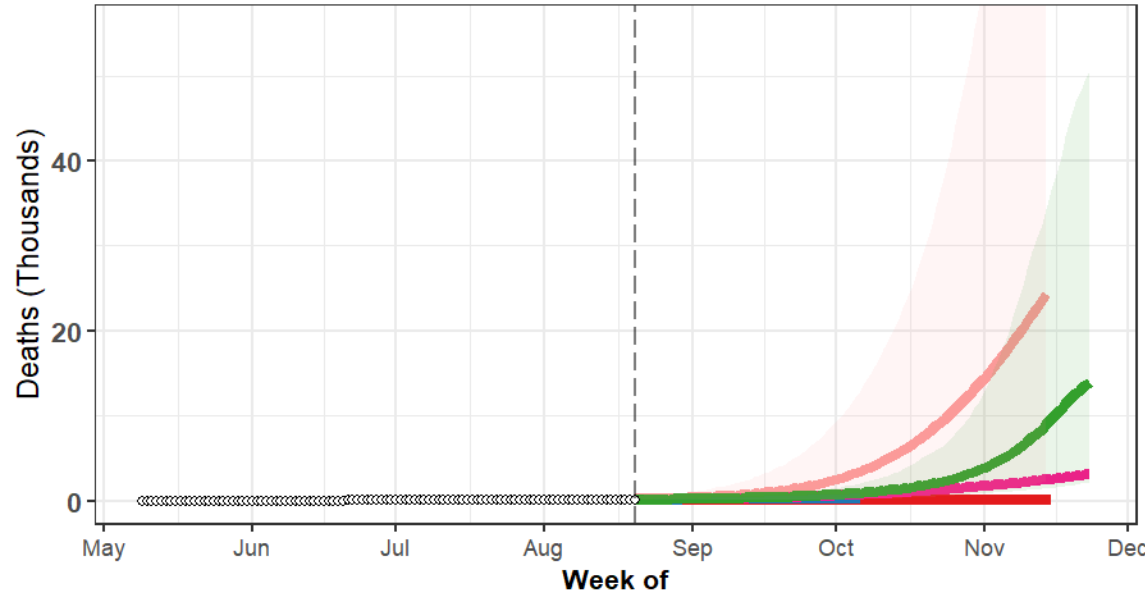

## Cumulative Out-Of-Sample Error (Post Intercept Shift)

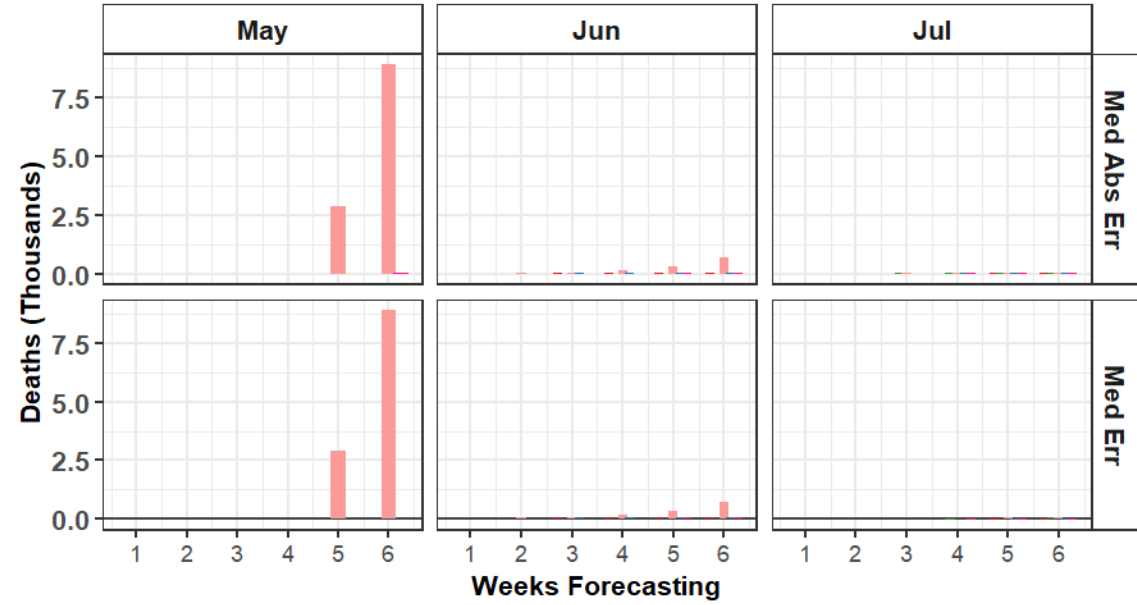

## All Model Versions

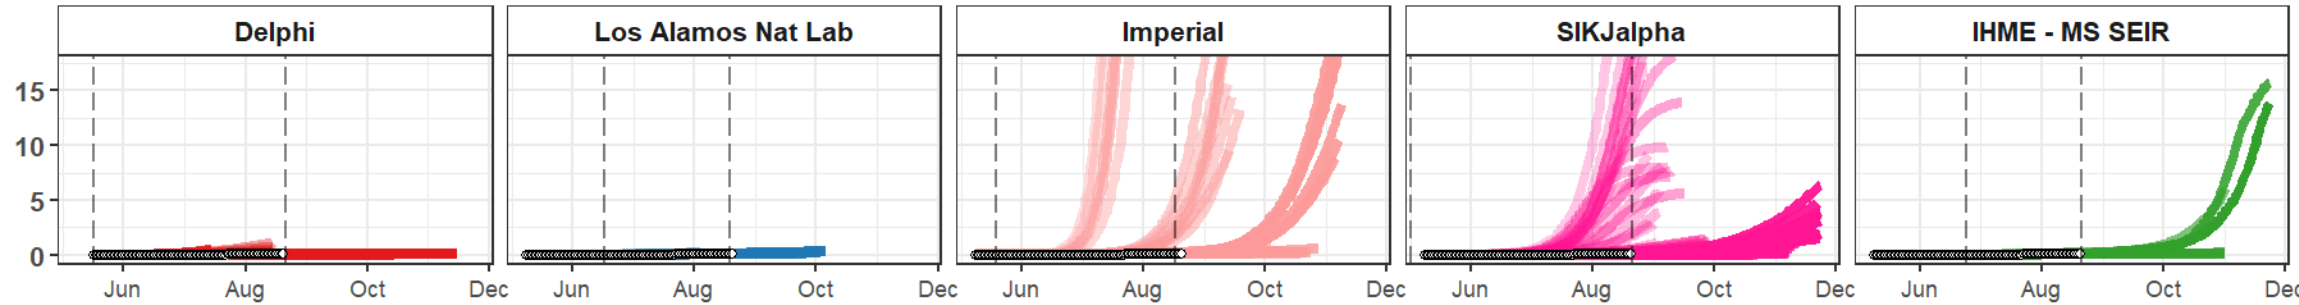

## All Cumulative Errors

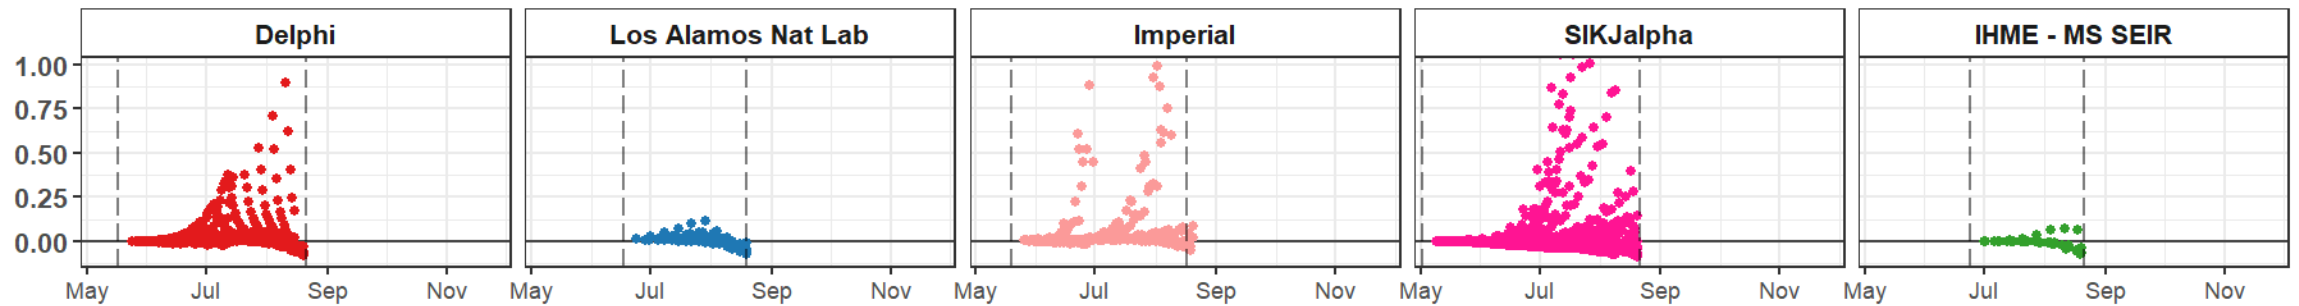

# Malaysia

## Current Forecast

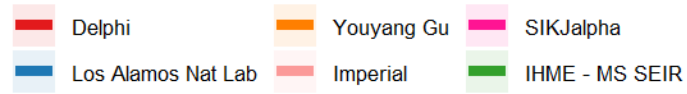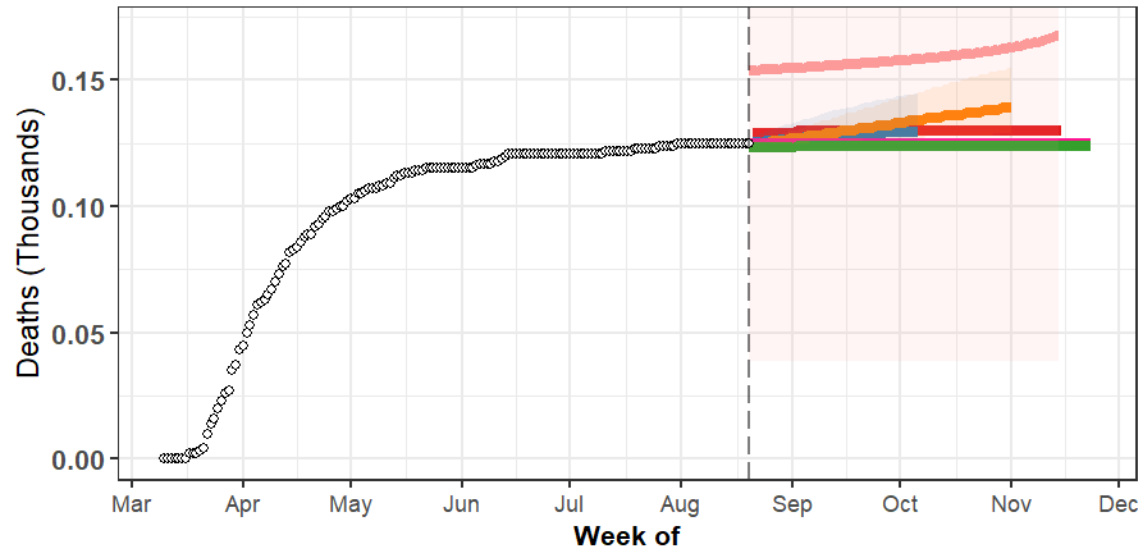

## Cumulative Out-Of-Sample Error (Post Intercept Shift)

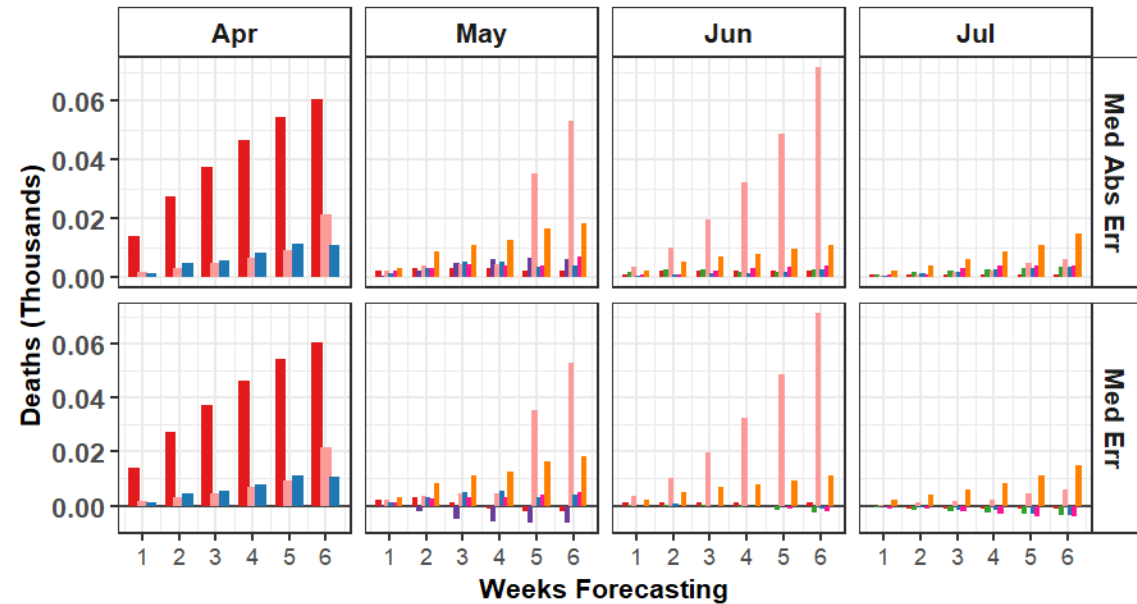

## All Model Versions

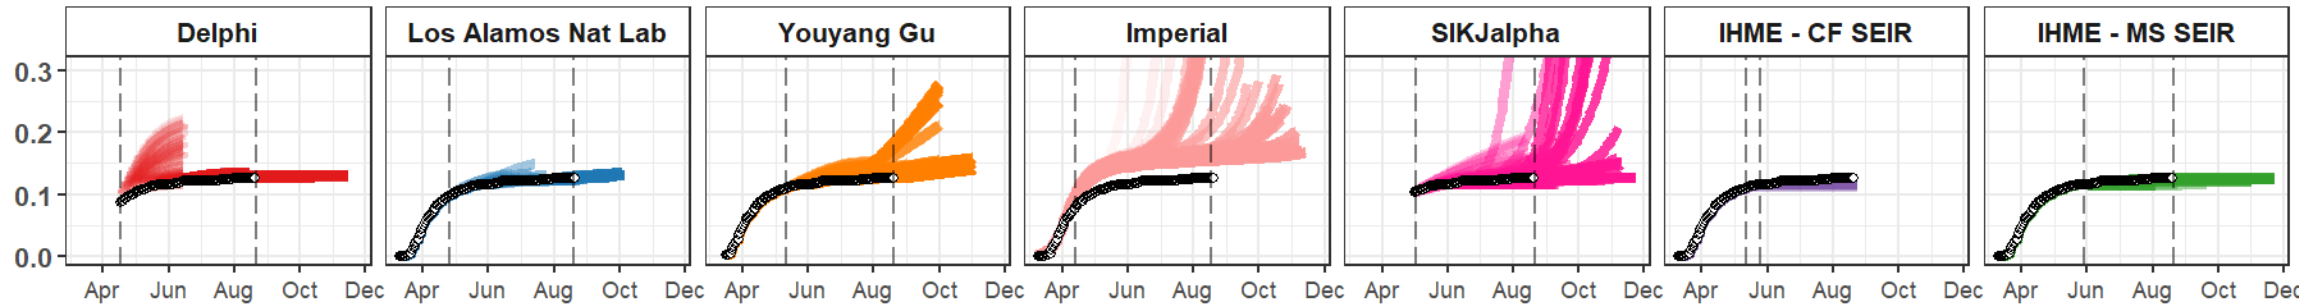

## All Cumulative Errors

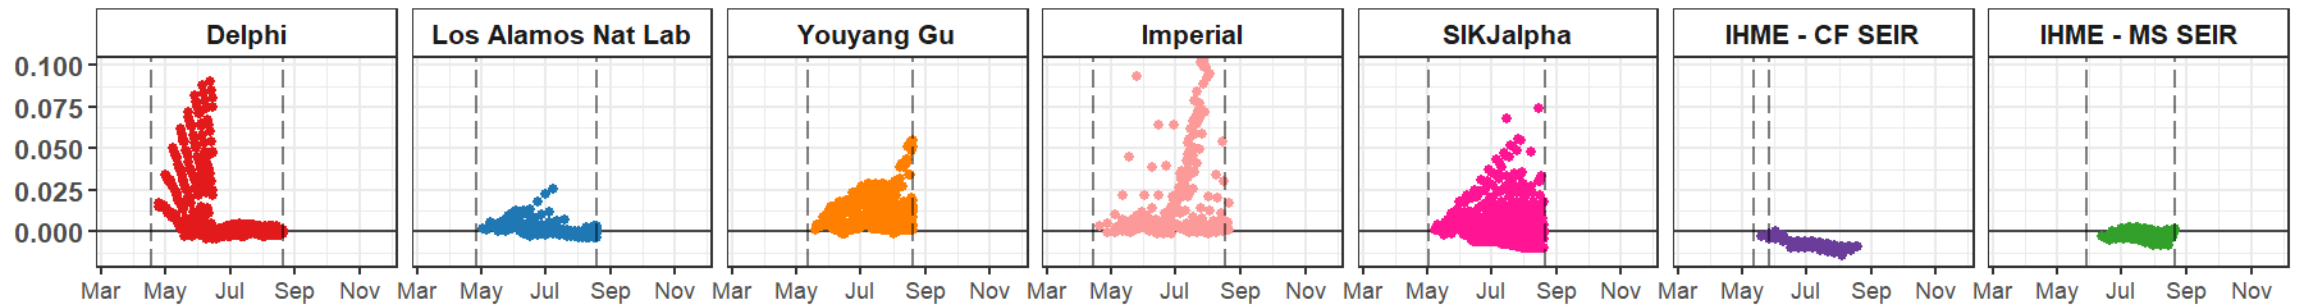

# Mali

## Current Forecast

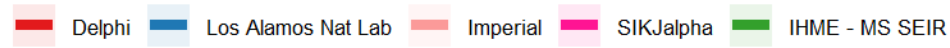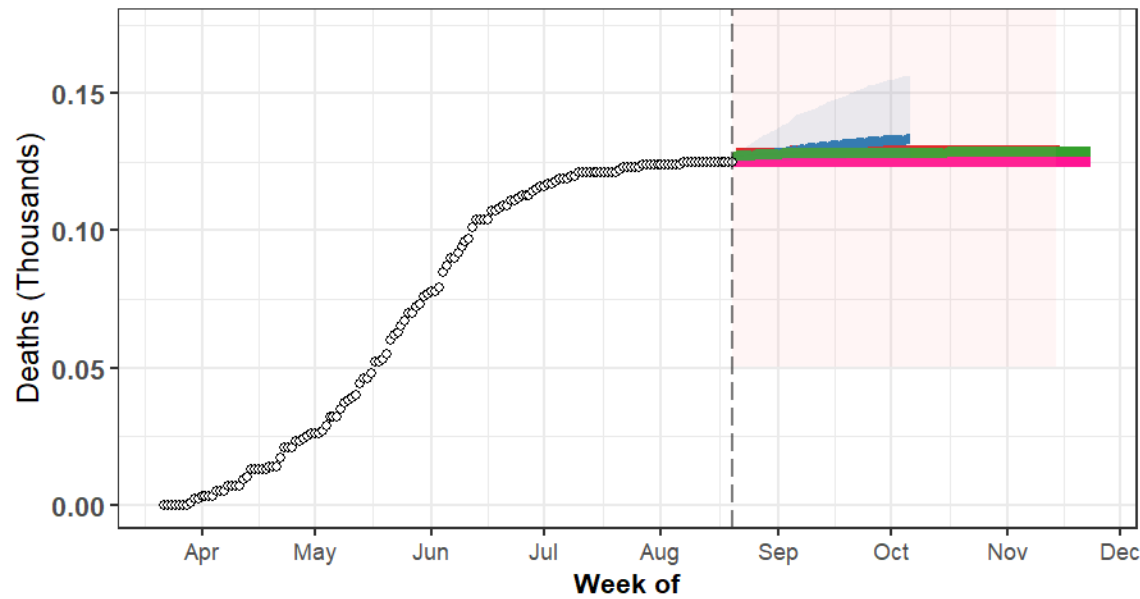

## Cumulative Out-Of-Sample Error (Post Intercept Shift)

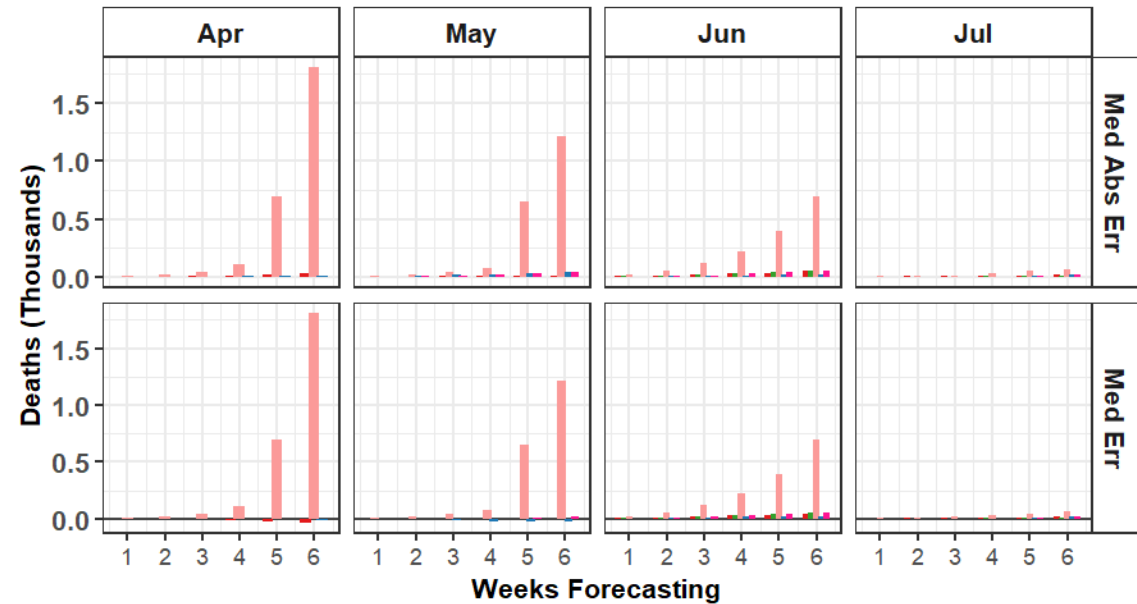

## All Model Versions

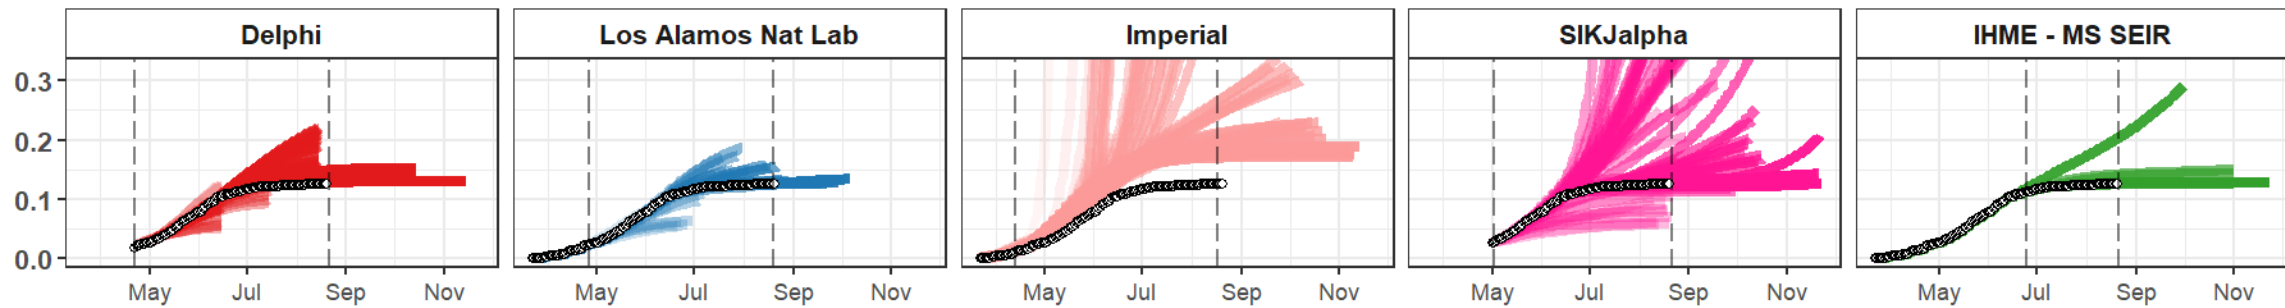

## All Cumulative Errors

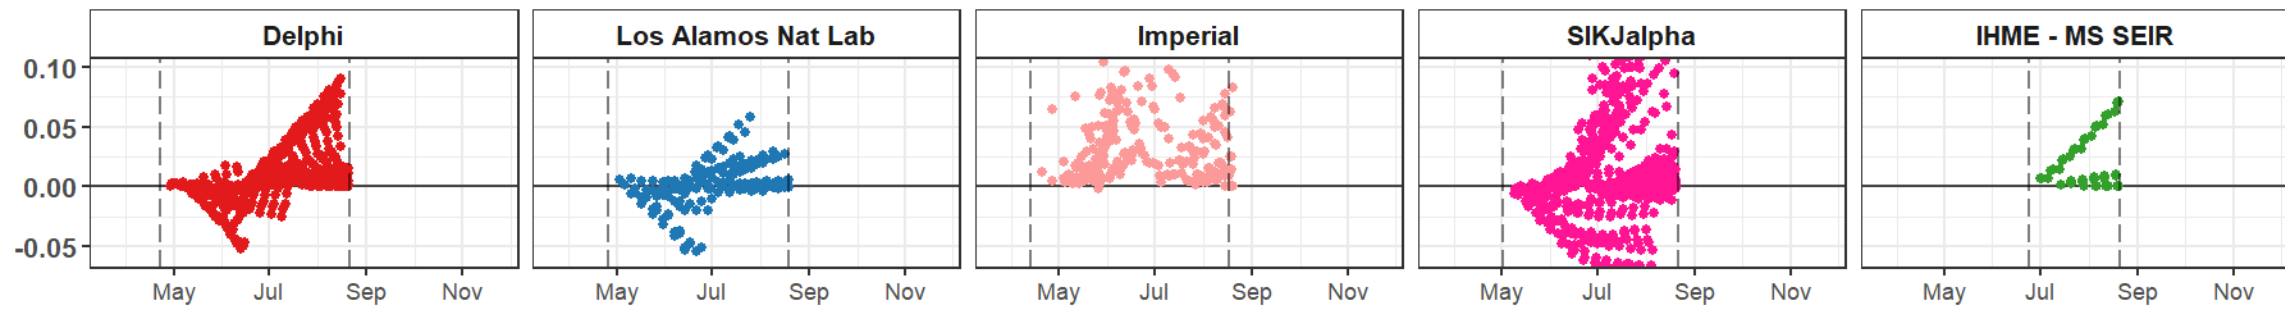

# Luxembourg

## Current Forecast

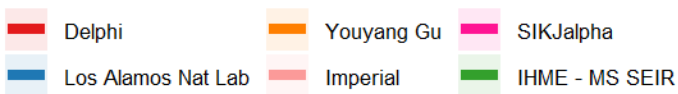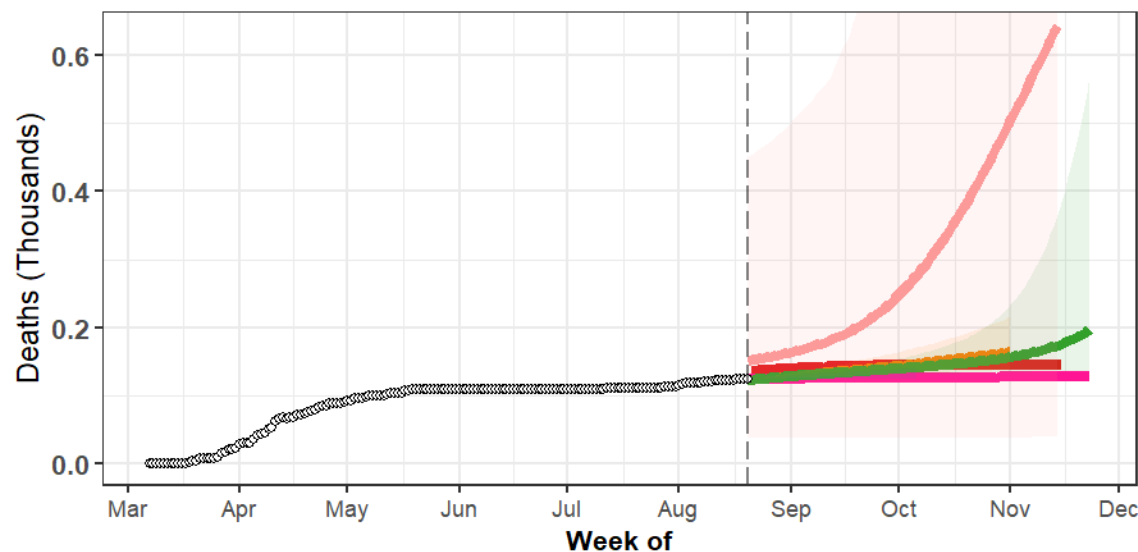

## Cumulative Out-Of-Sample Error (Post Intercept Shift)

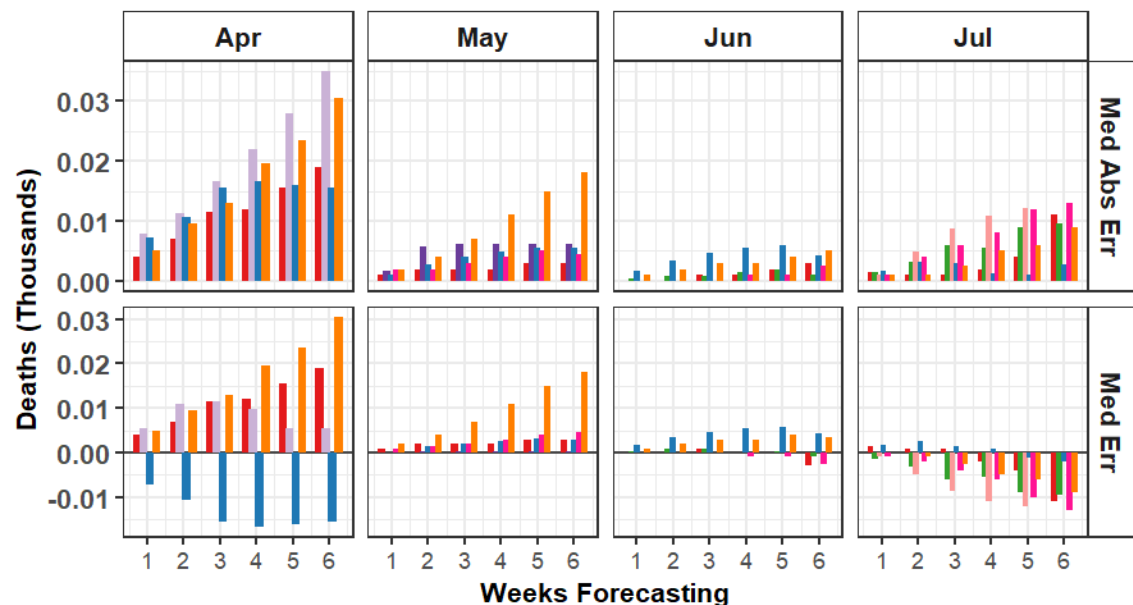

## All Model Versions

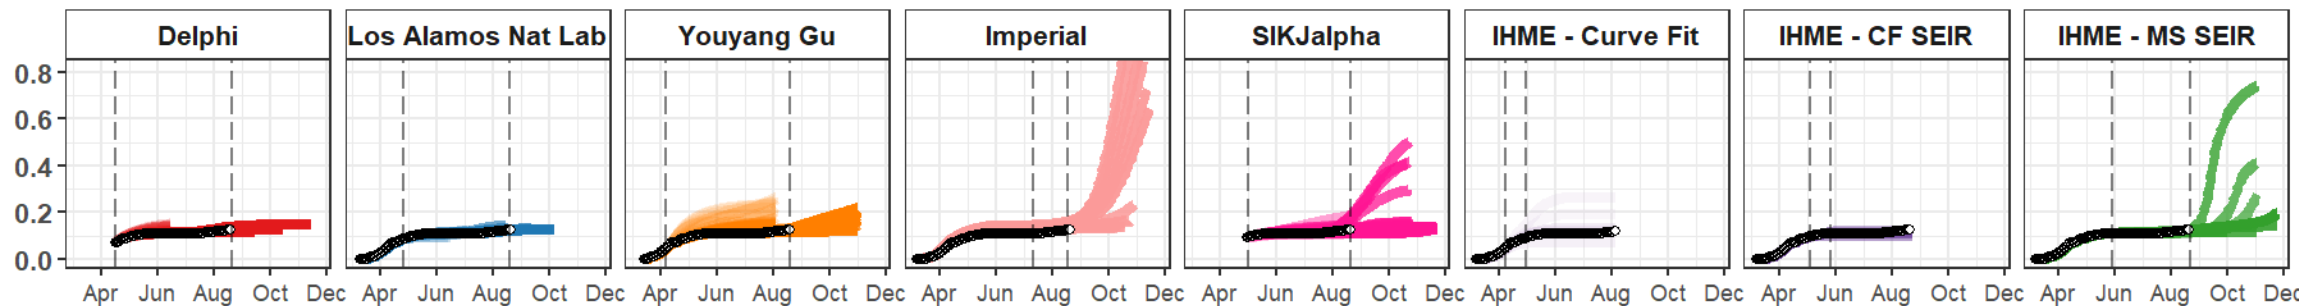

## All Cumulative Errors

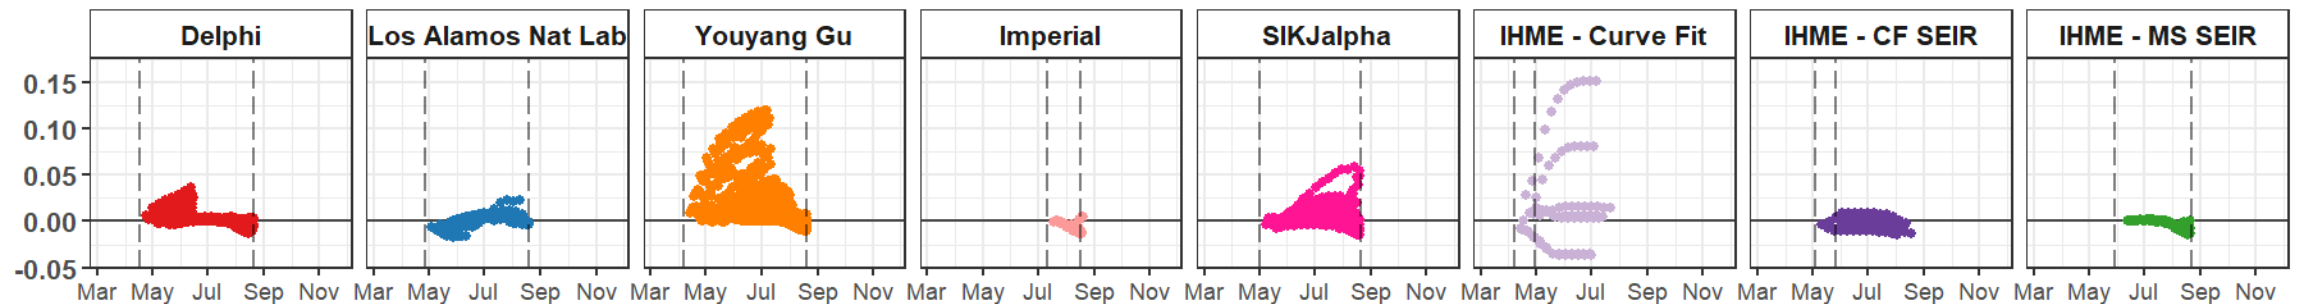



# Lebanon

## Current Forecast

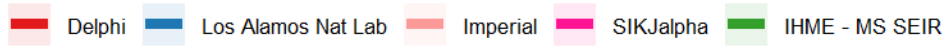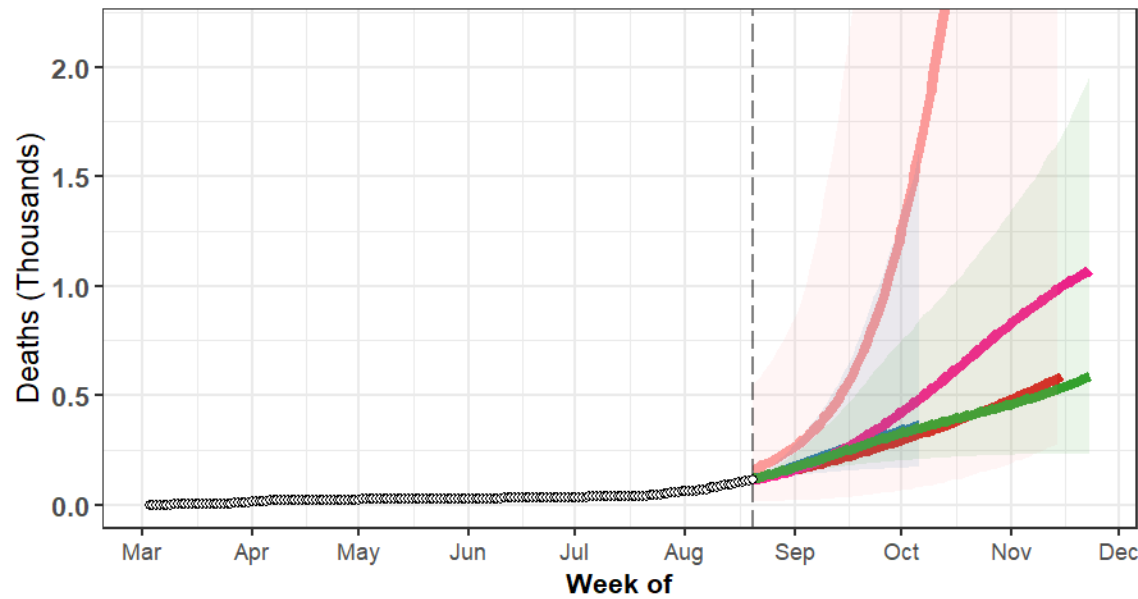

## Cumulative Out-Of-Sample Error (Post Intercept Shift)

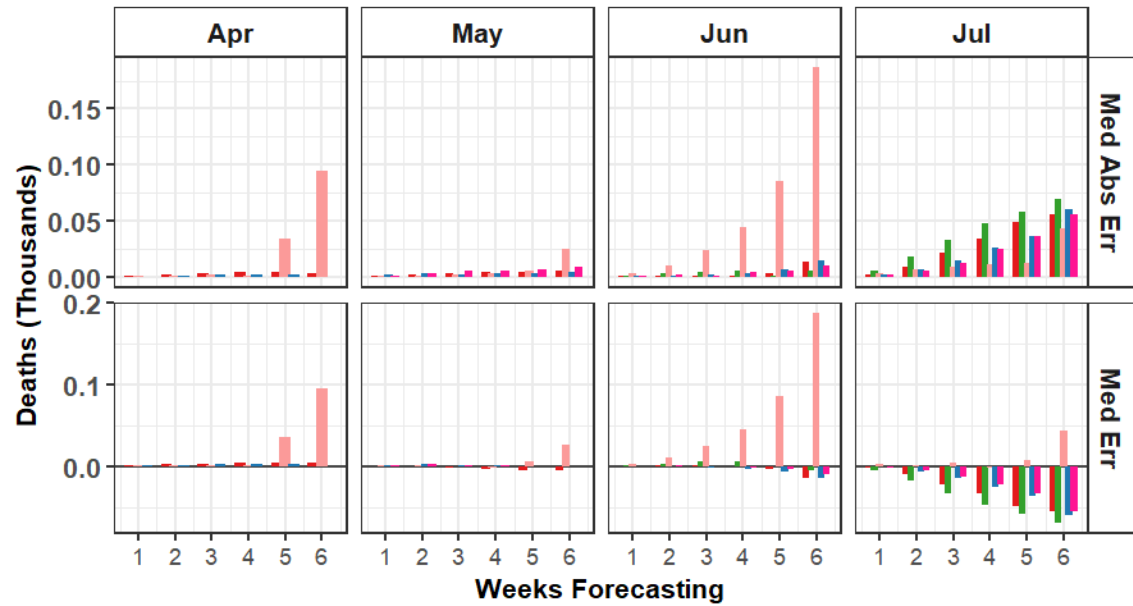

## All Model Versions

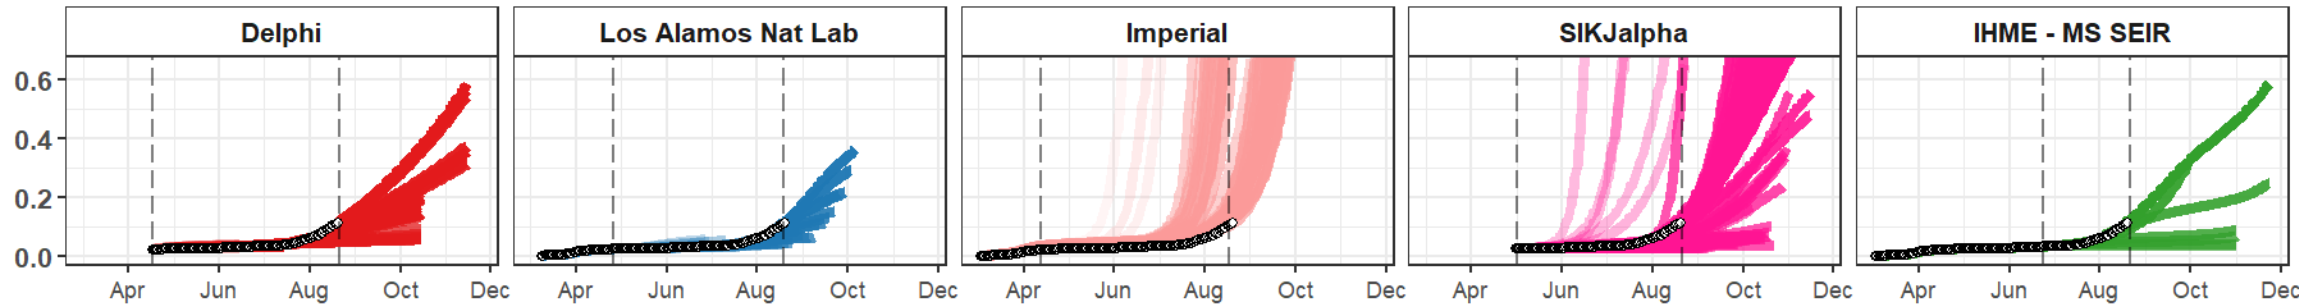

## All Cumulative Errors

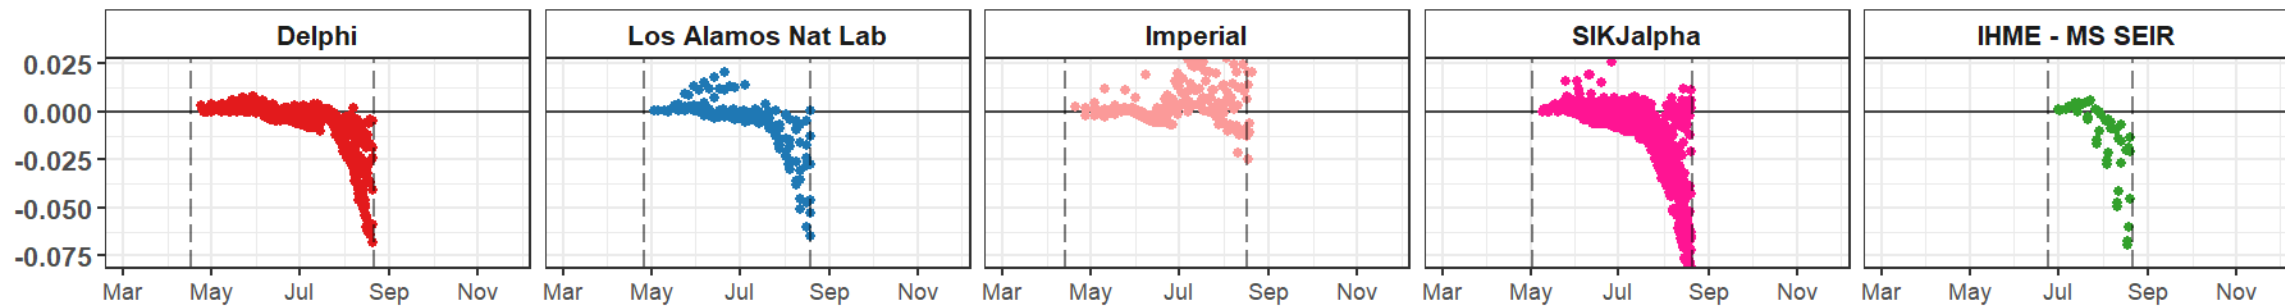

# Cote d'Ivoire

## Current Forecast

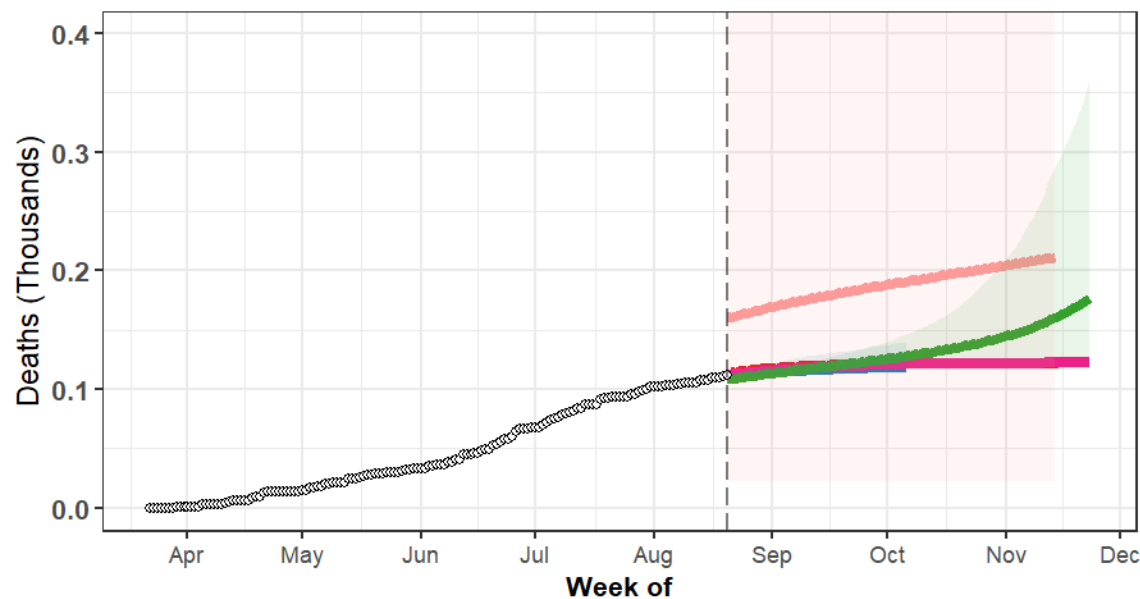

## Cumulative Out-Of-Sample Error (Post Intercept Shift)

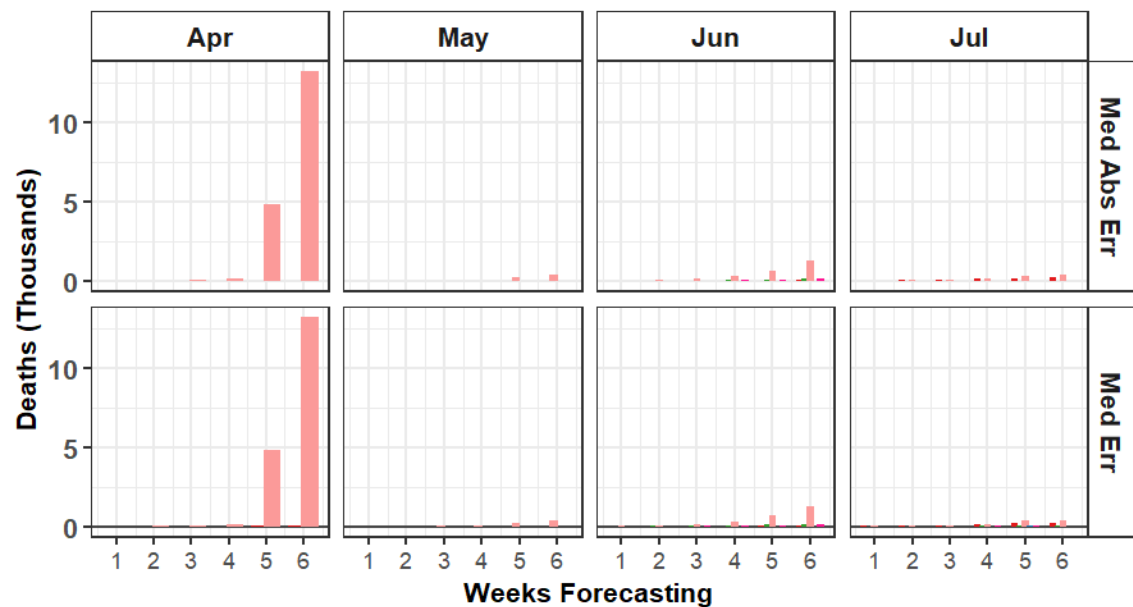

## All Model Versions

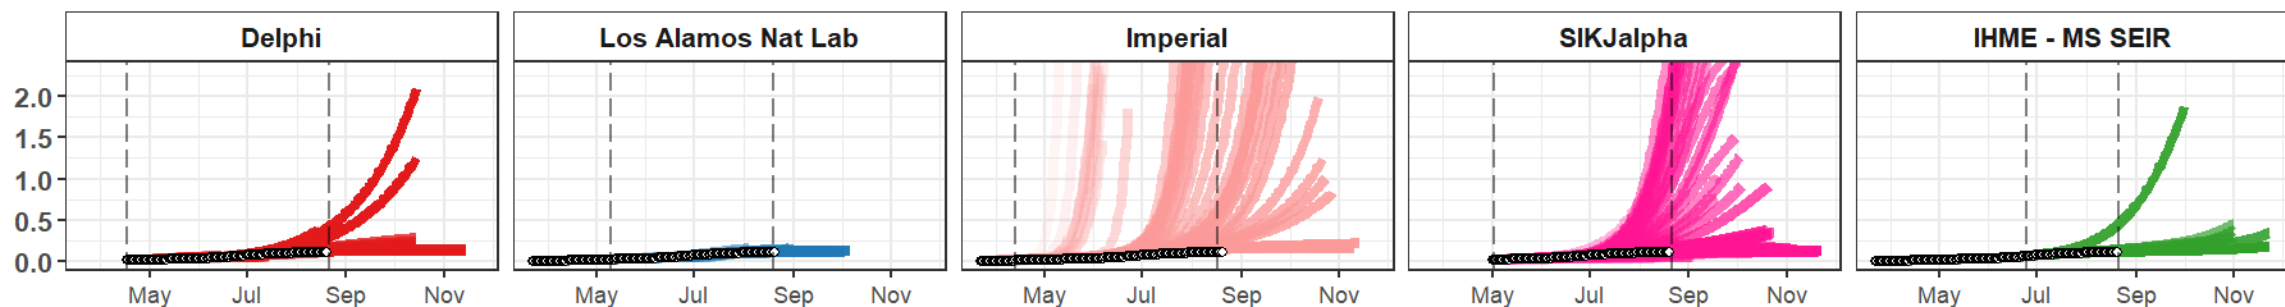

## All Cumulative Errors

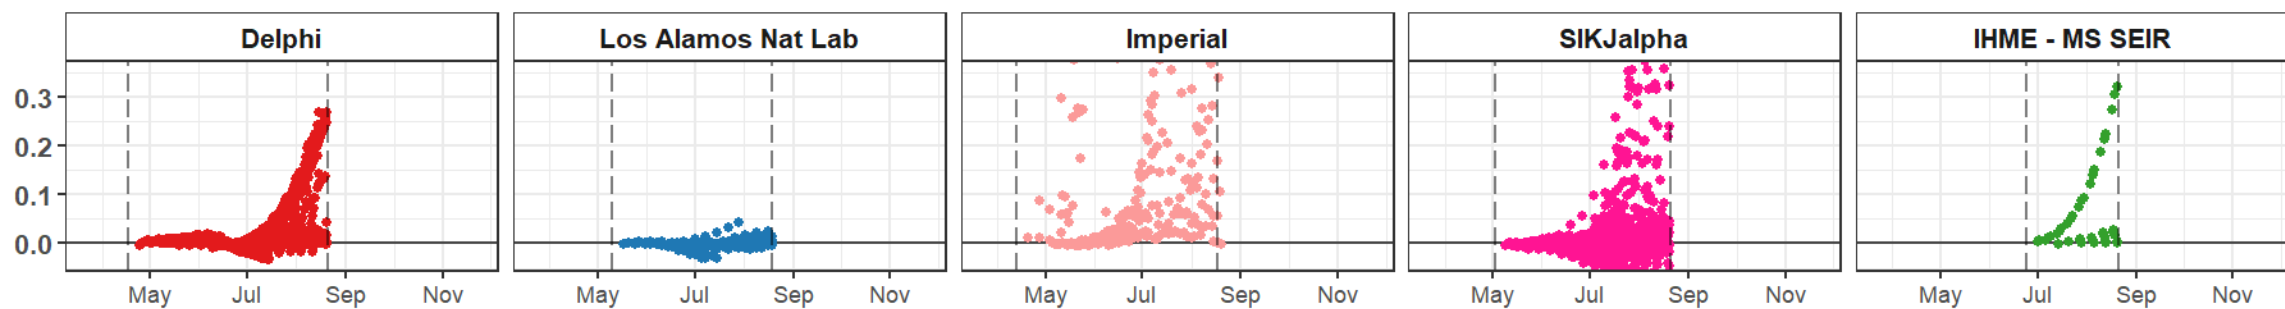

# Angola

## Current Forecast

Delphi Los Alamos Nat Lab Imperial SIKJalpha IHME - MS SEIR

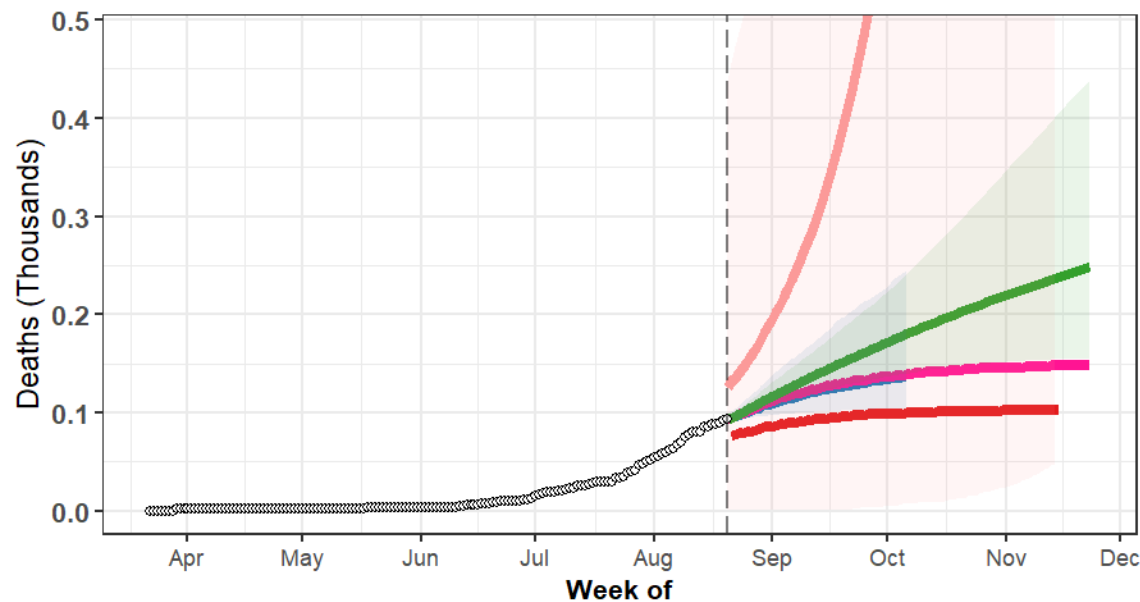

## Cumulative Out-Of-Sample Error (Post Intercept Shift)

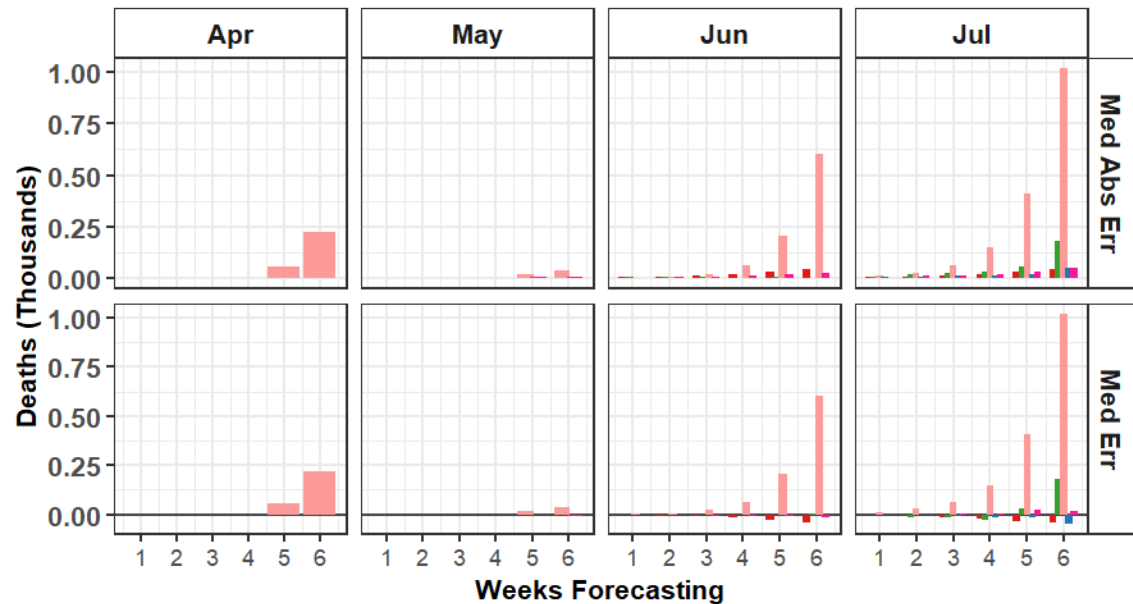

## All Model Versions

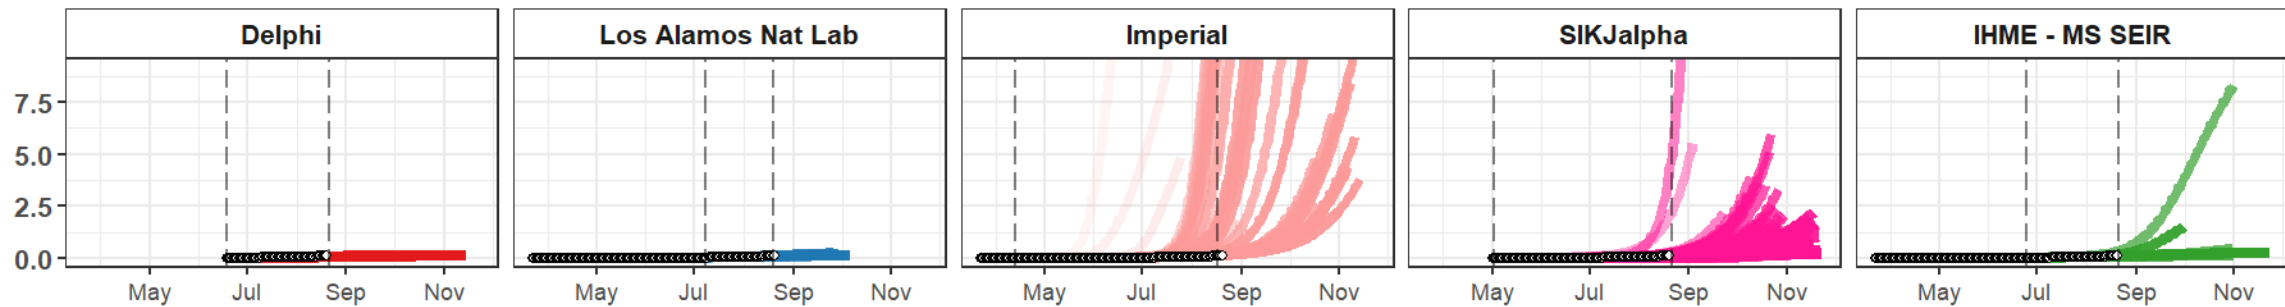

## All Cumulative Errors

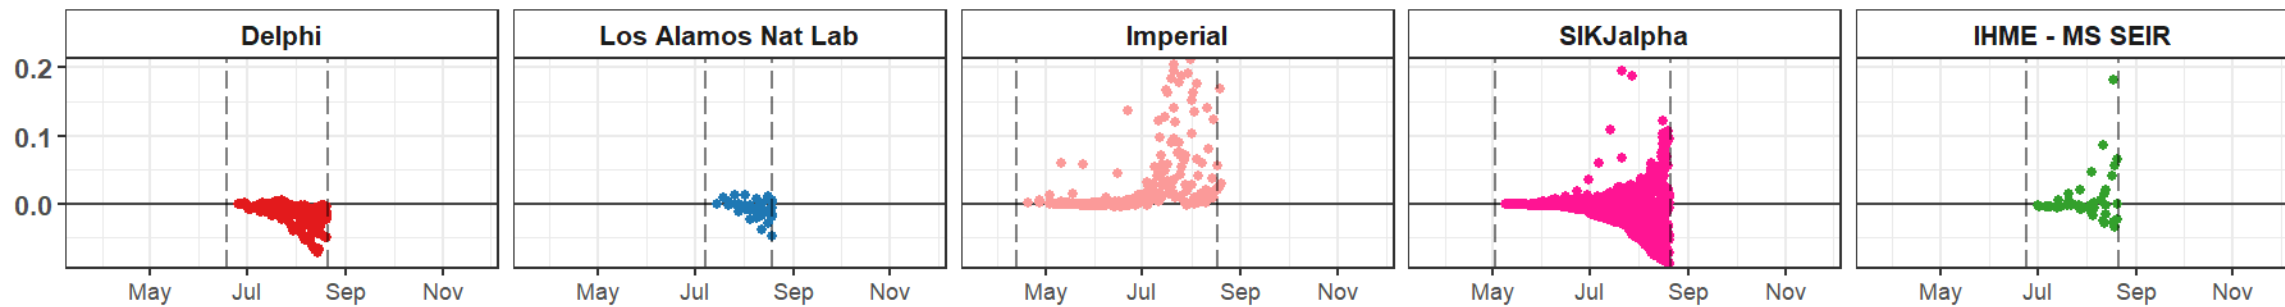

# Somalia

## Current Forecast

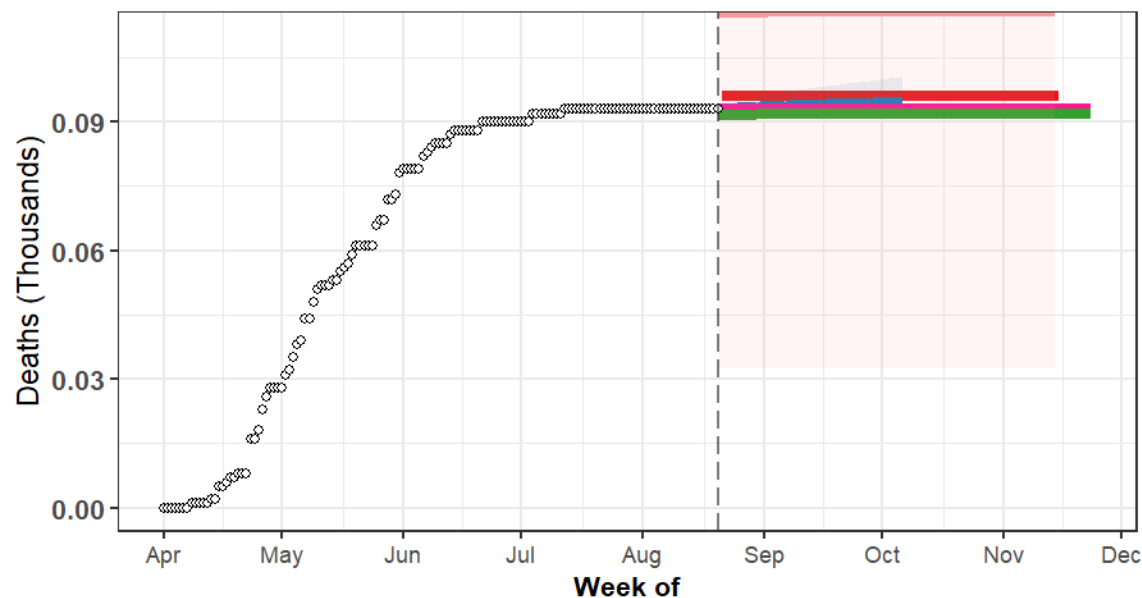

## Cumulative Out-Of-Sample Error (Post Intercept Shift)

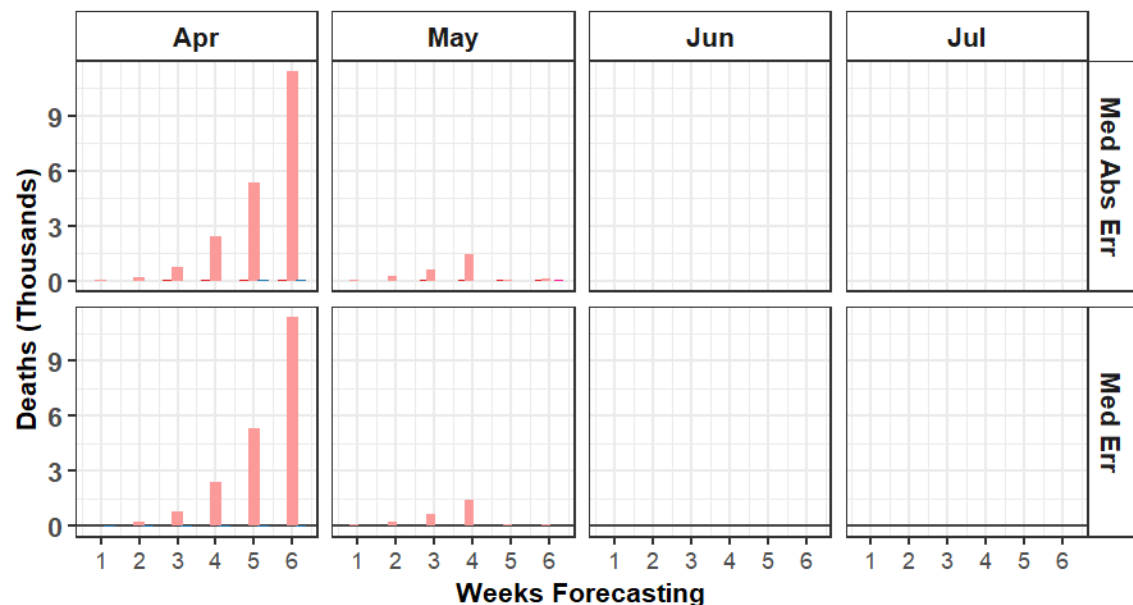

## All Model Versions

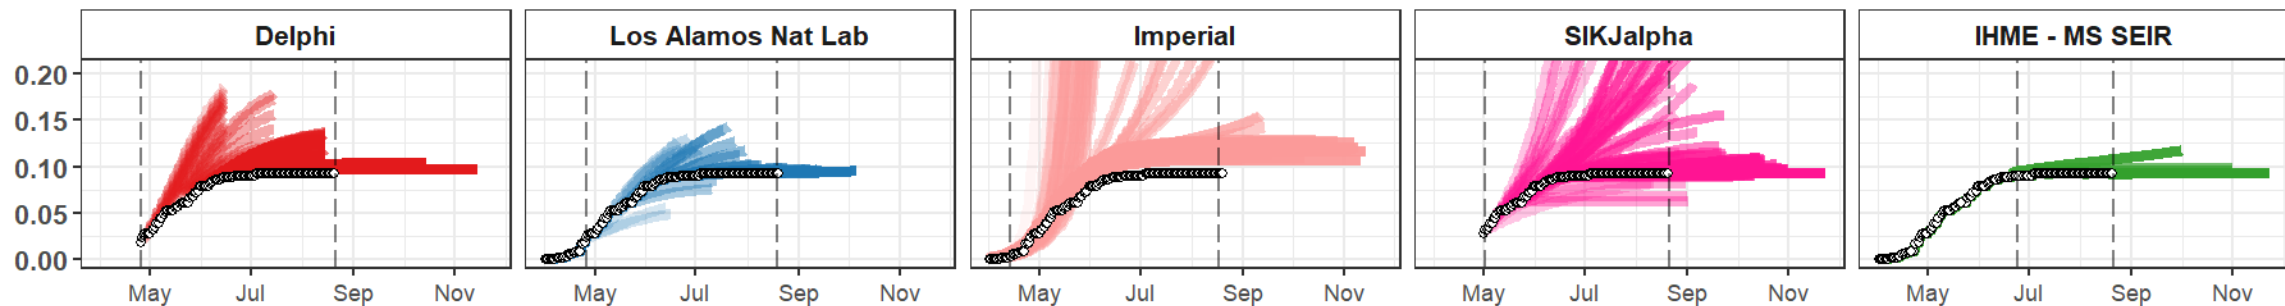

## All Cumulative Errors

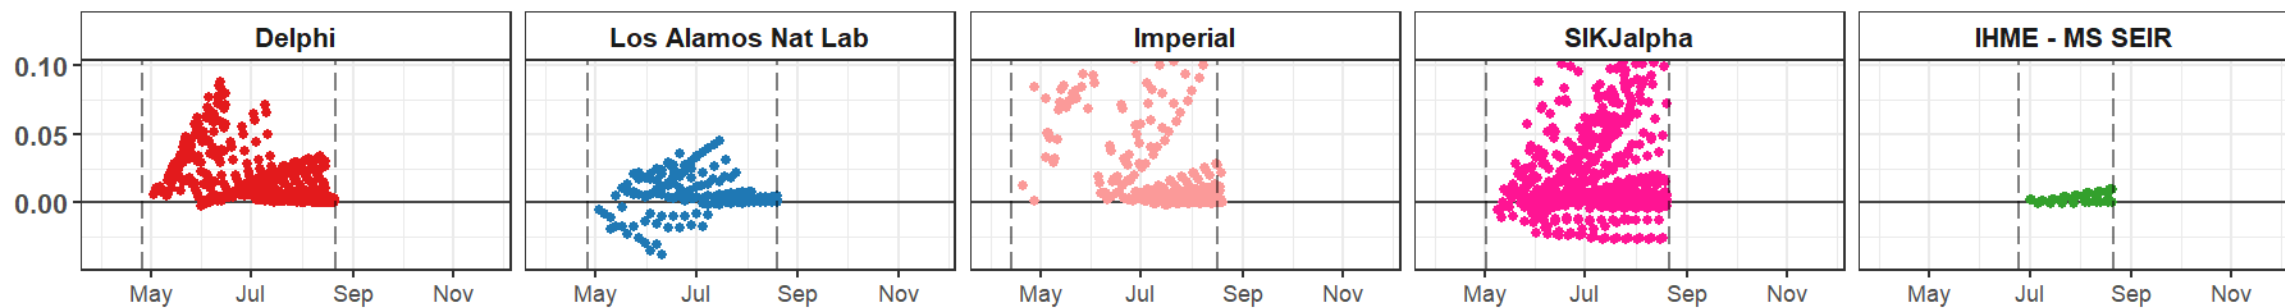

# Montana

## Current Forecast

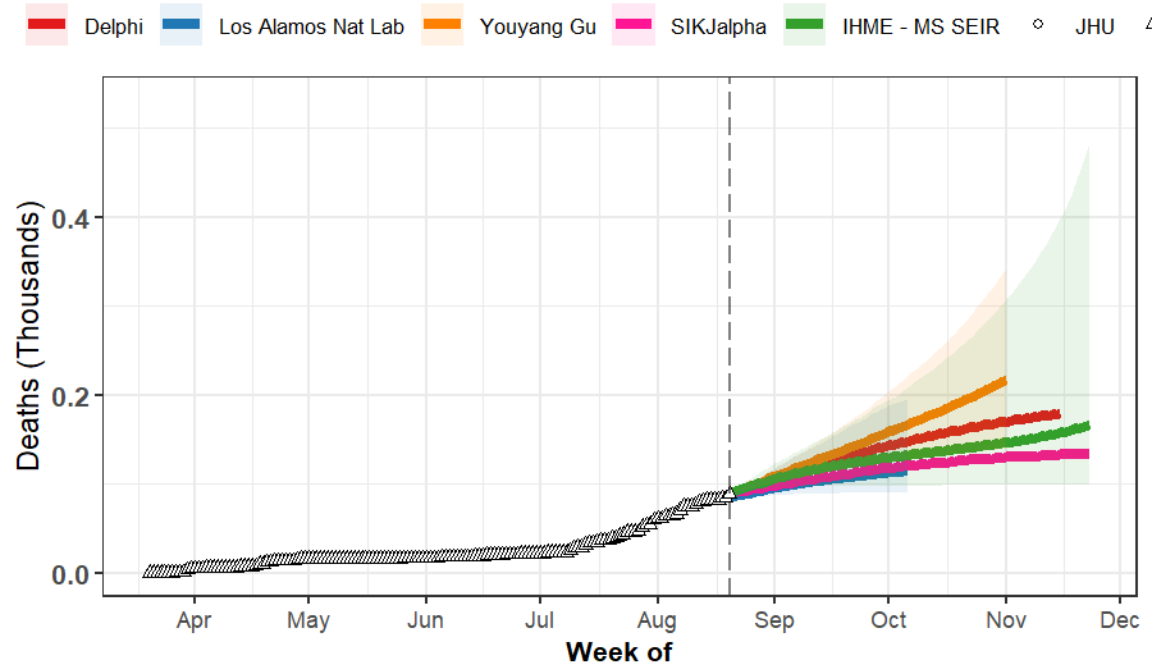

## Cumulative Out-Of-Sample Error (Post Intercept Shift)

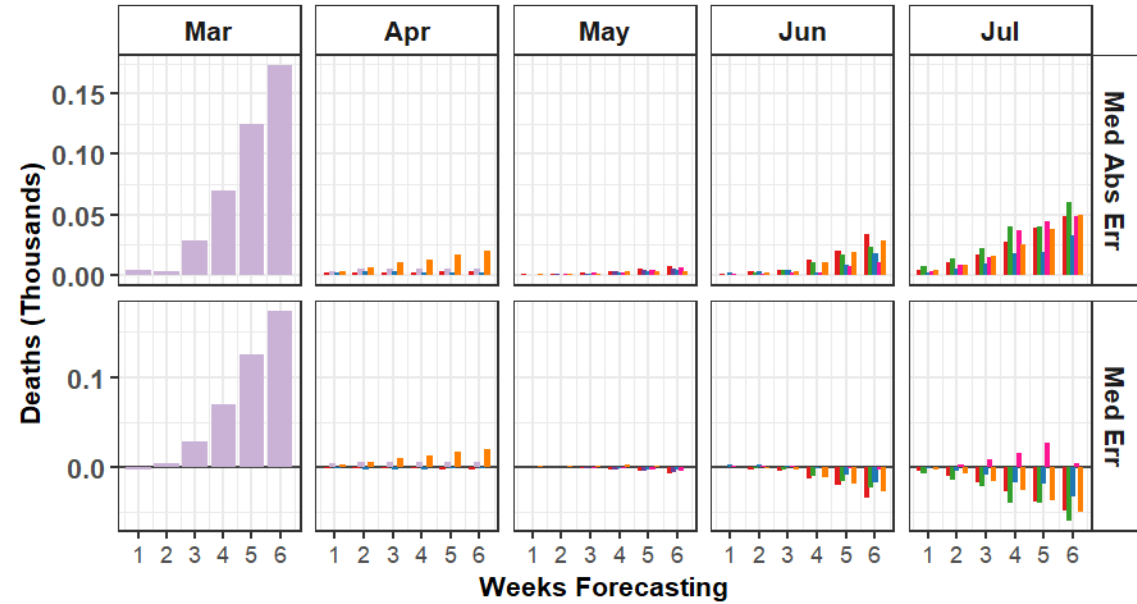

## All Model Versions

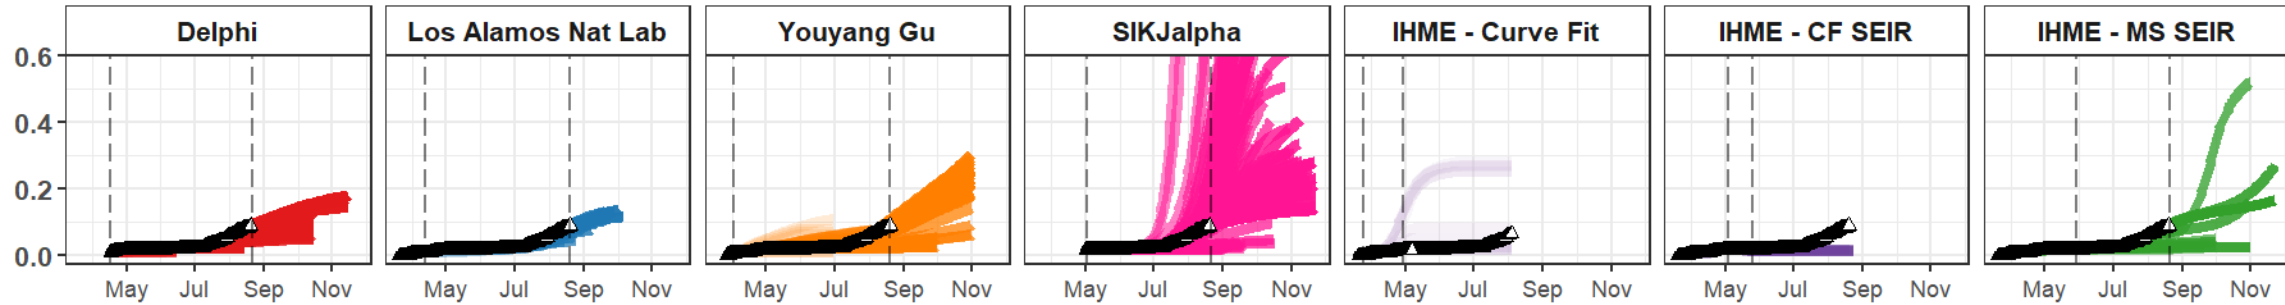

## All Cumulative Errors

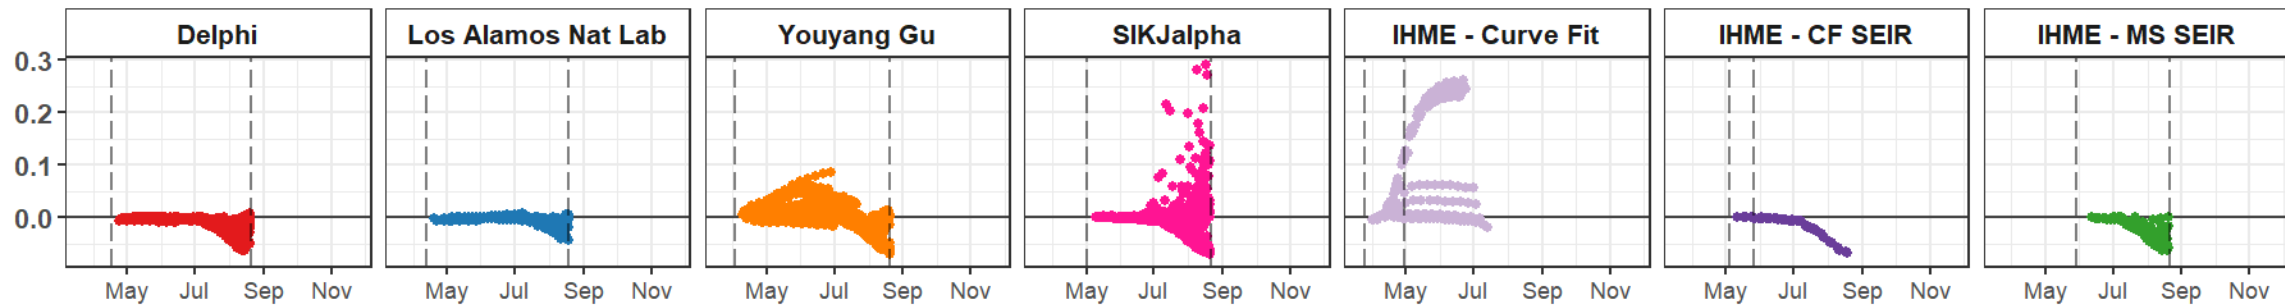

# Cuba

## Current Forecast

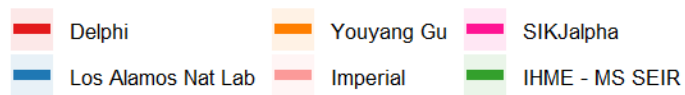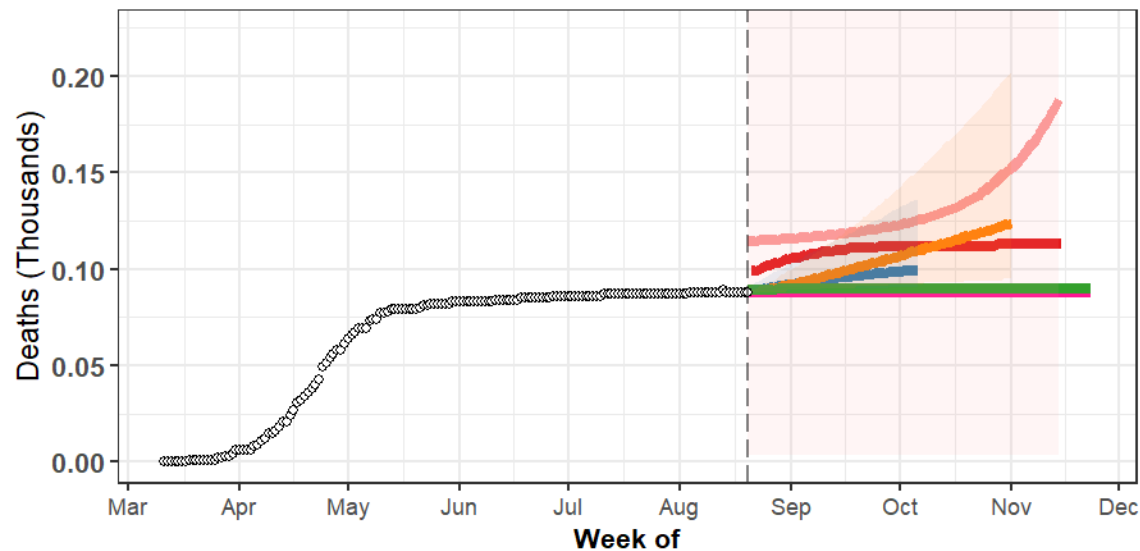

## Cumulative Out-Of-Sample Error (Post Intercept Shift)

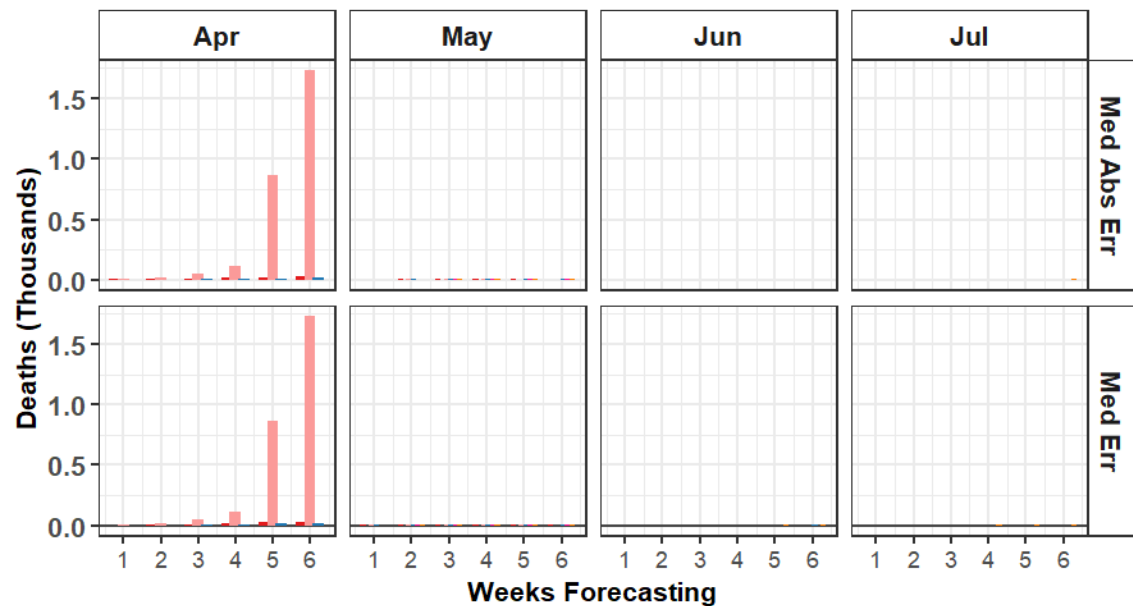

## All Model Versions

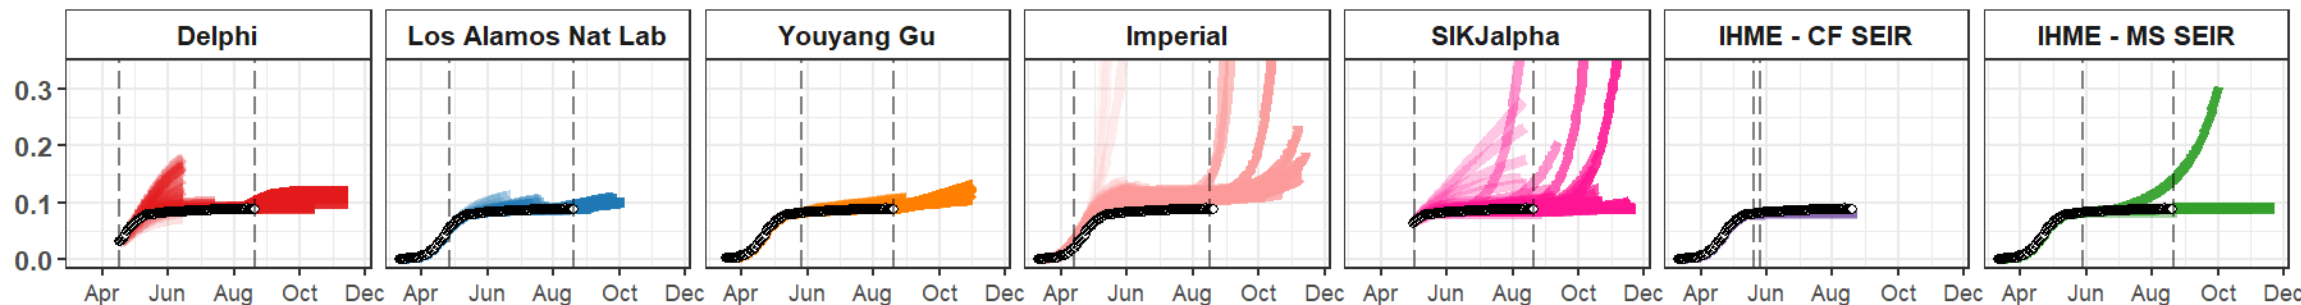

## All Cumulative Errors

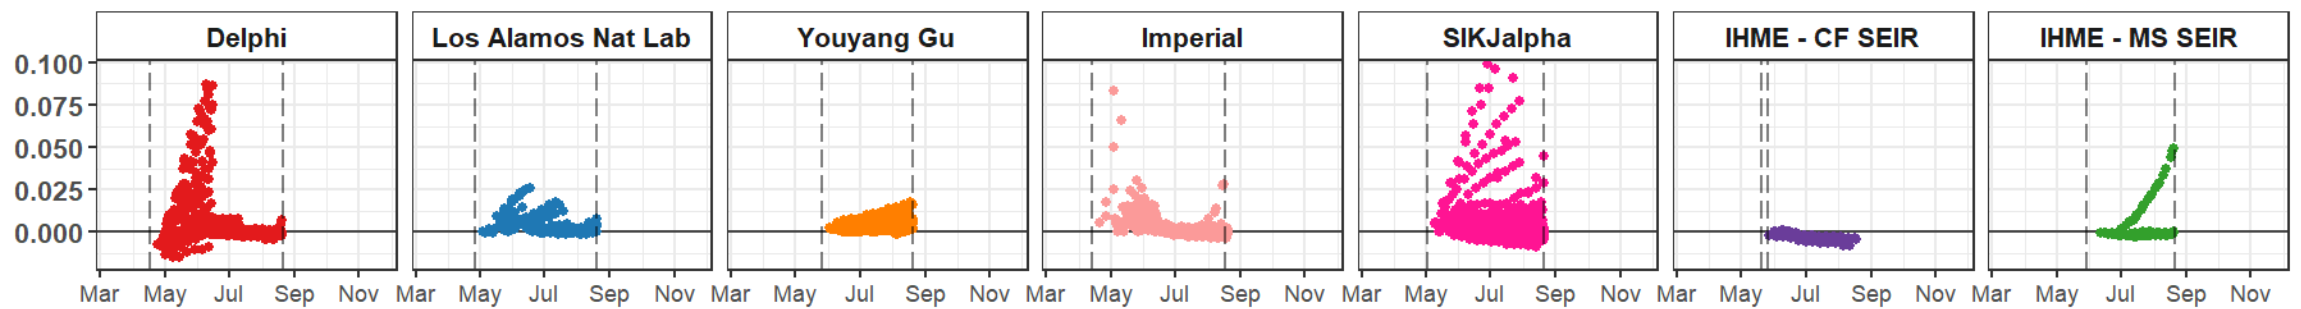

# Equatorial Guinea

## Current Forecast

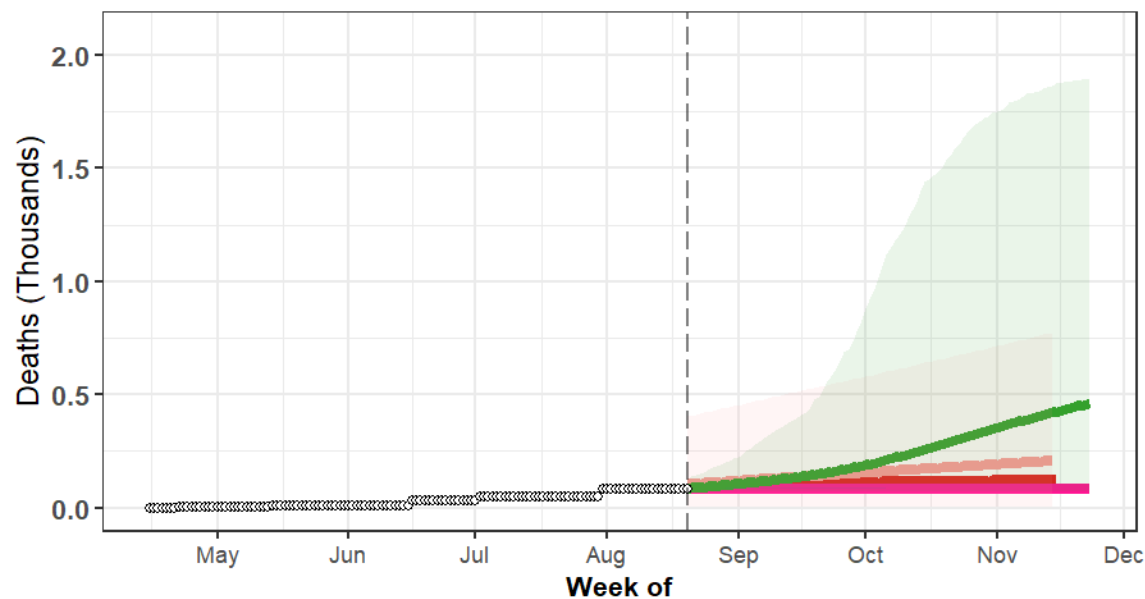

## Cumulative Out-Of-Sample Error (Post Intercept Shift)

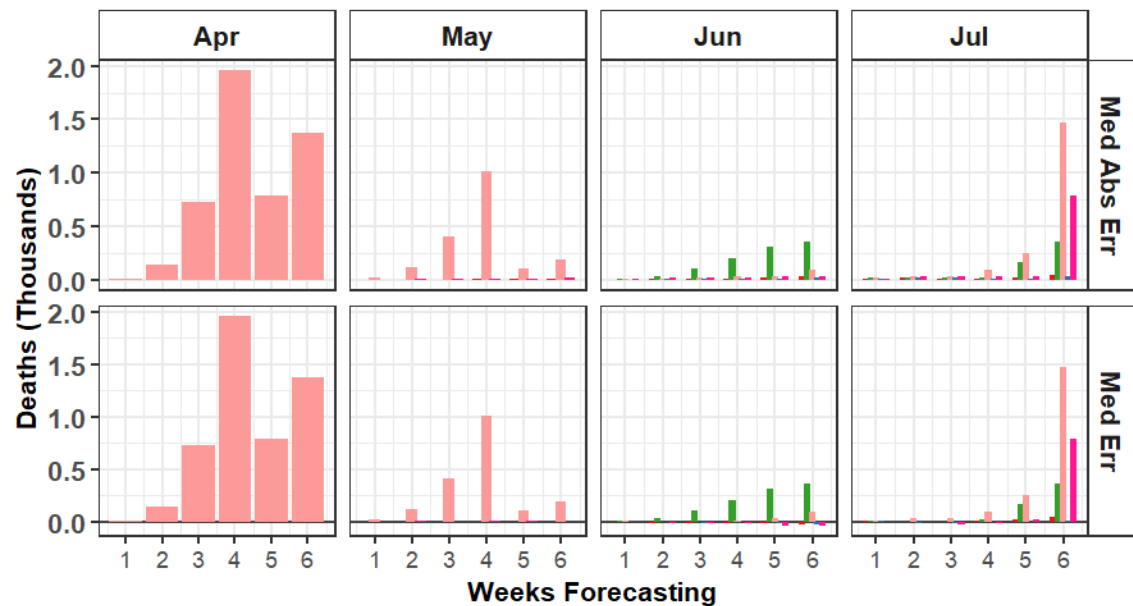

## All Model Versions

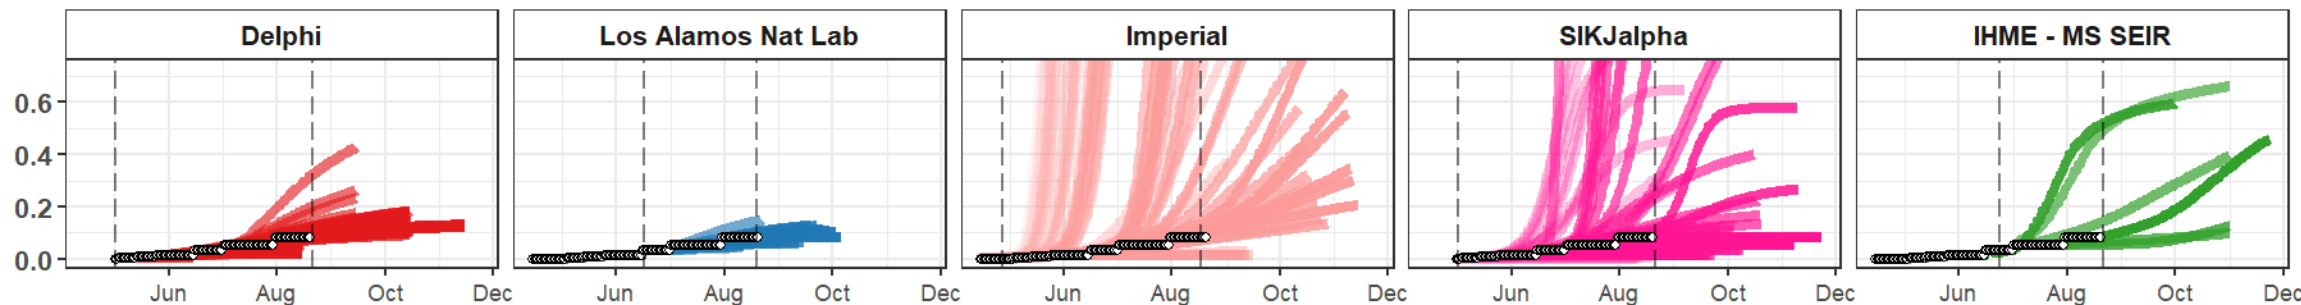

## All Cumulative Errors

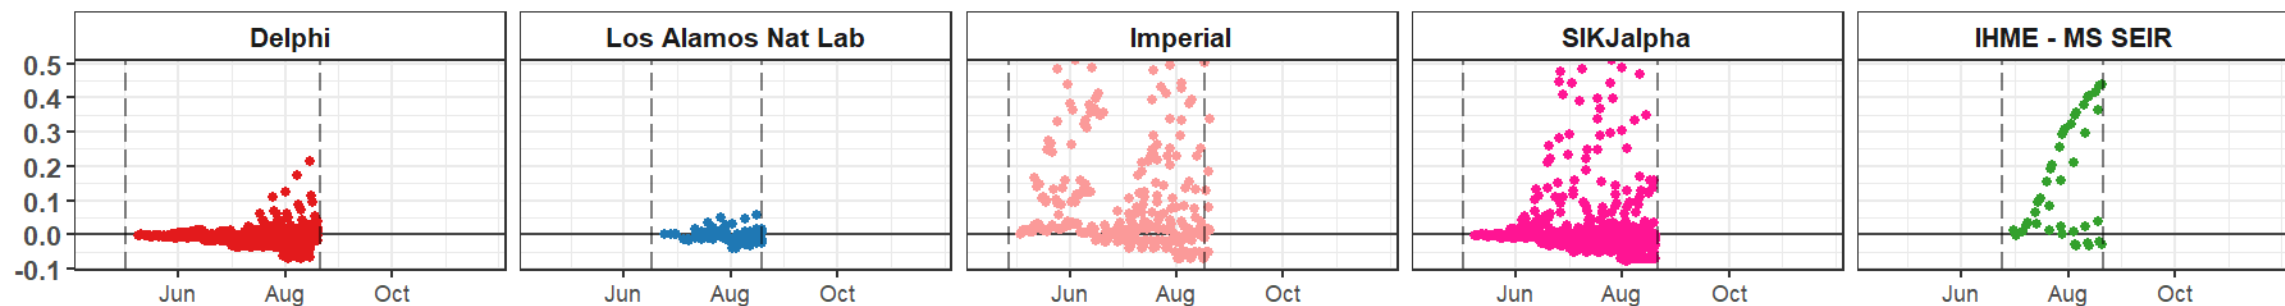

# Liberia

## Current Forecast

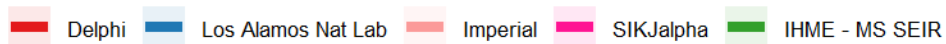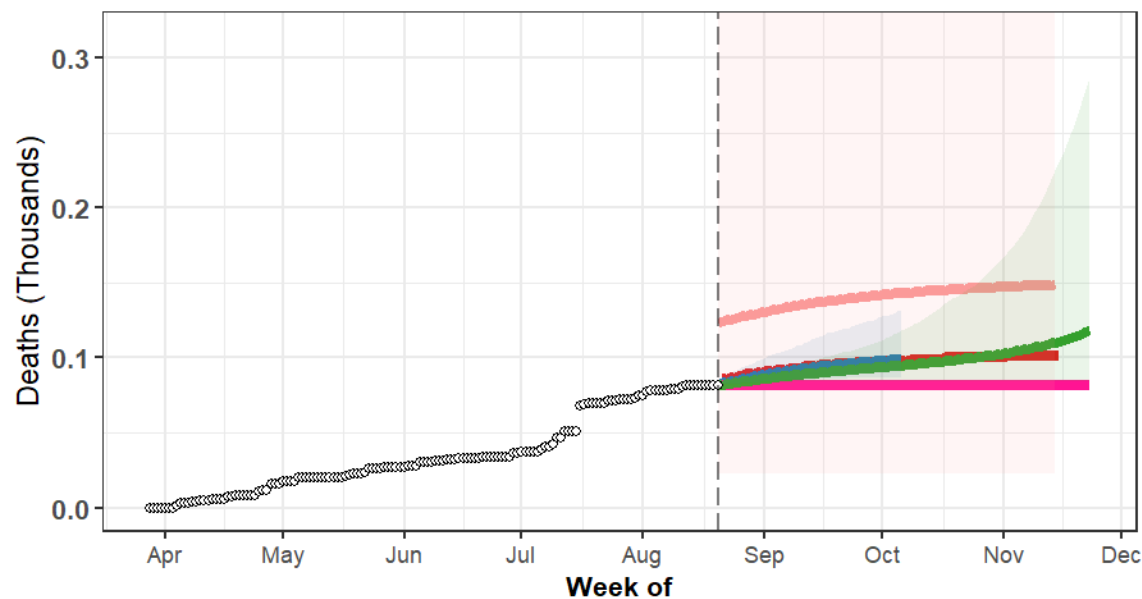

## Cumulative Out-Of-Sample Error (Post Intercept Shift)

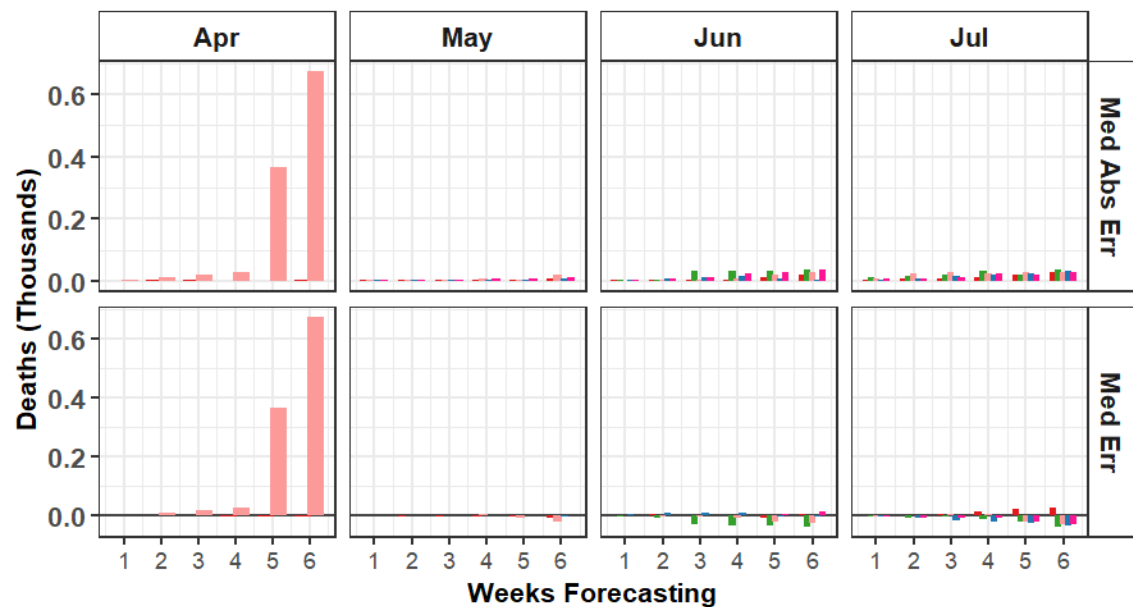

## All Model Versions

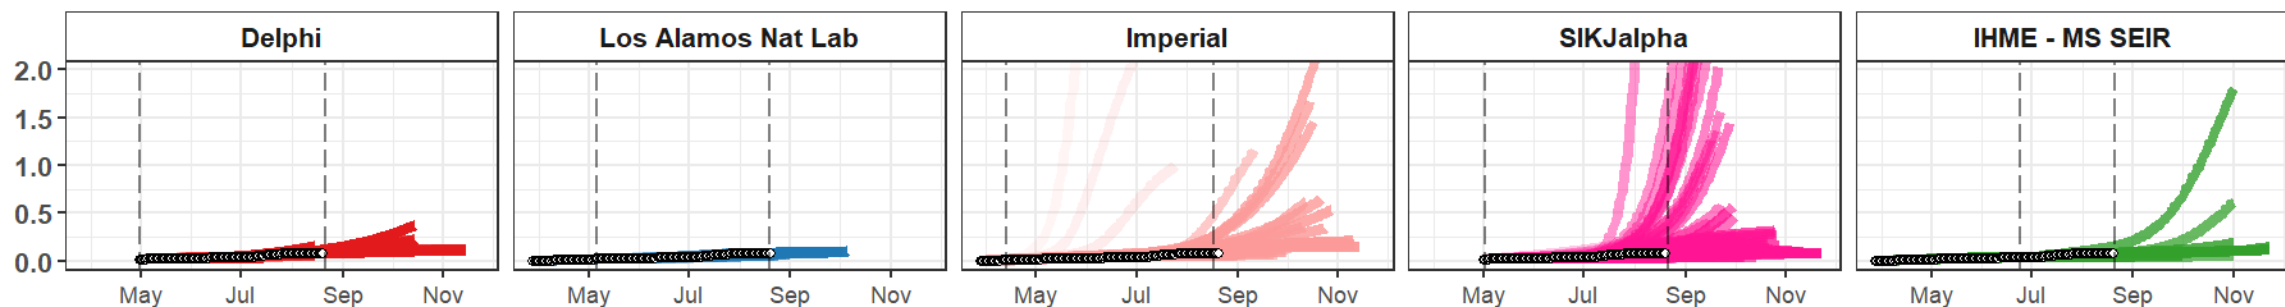

## All Cumulative Errors

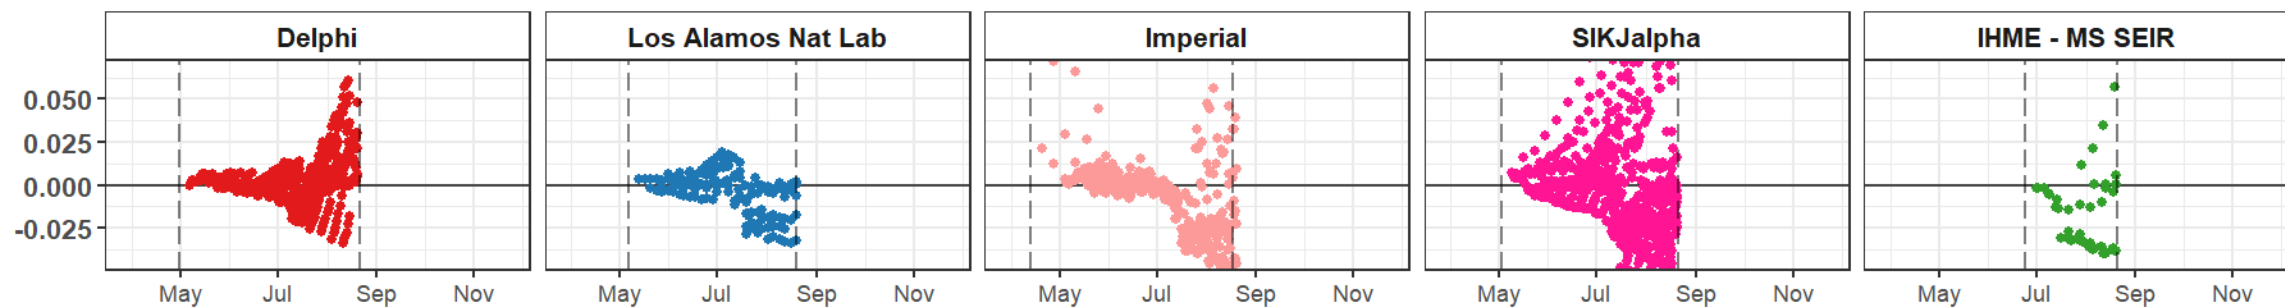



# Lithuania

## Current Forecast

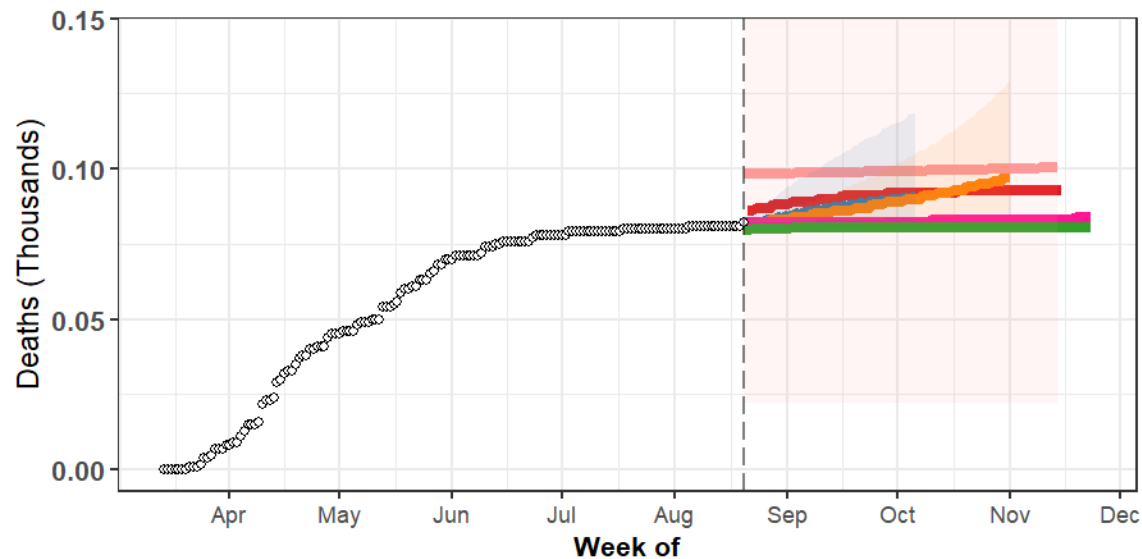

## Cumulative Out-Of-Sample Error (Post Intercept Shift)

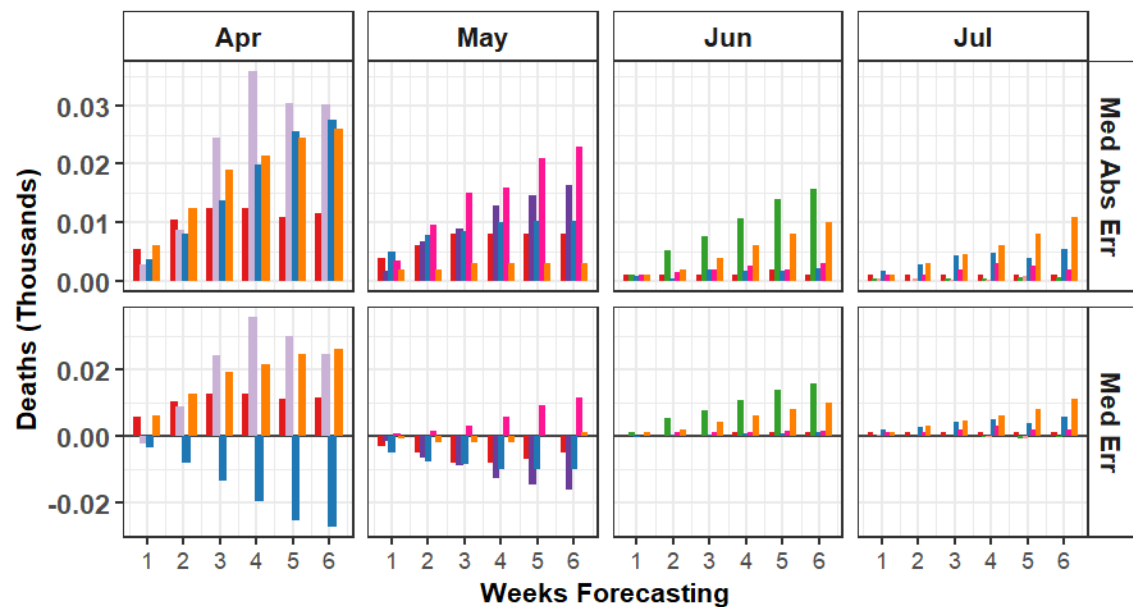

## All Model Versions

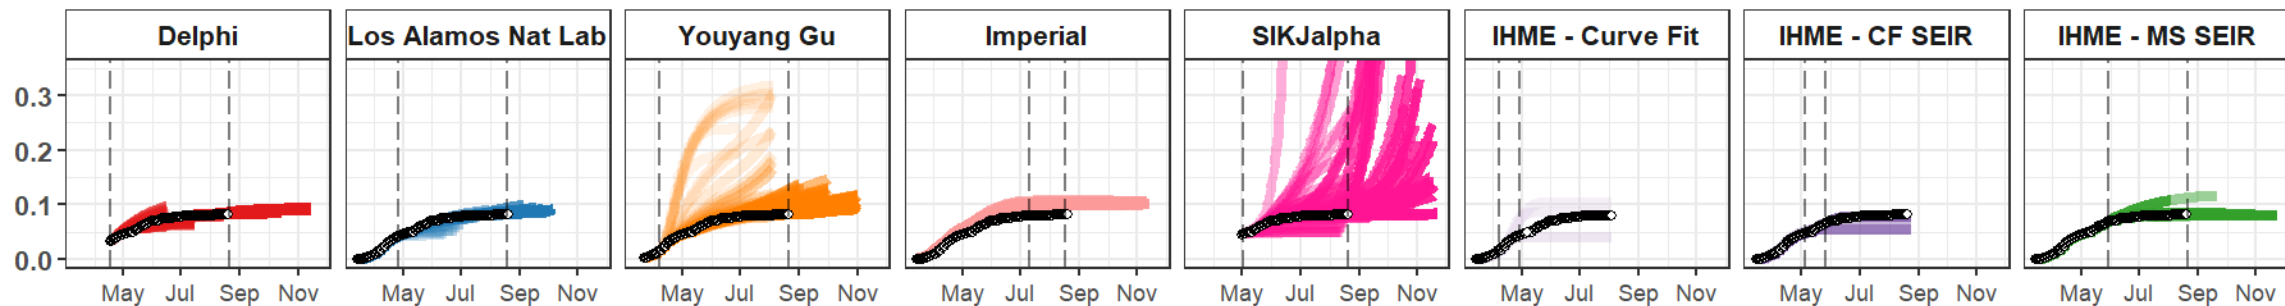

## All Cumulative Errors

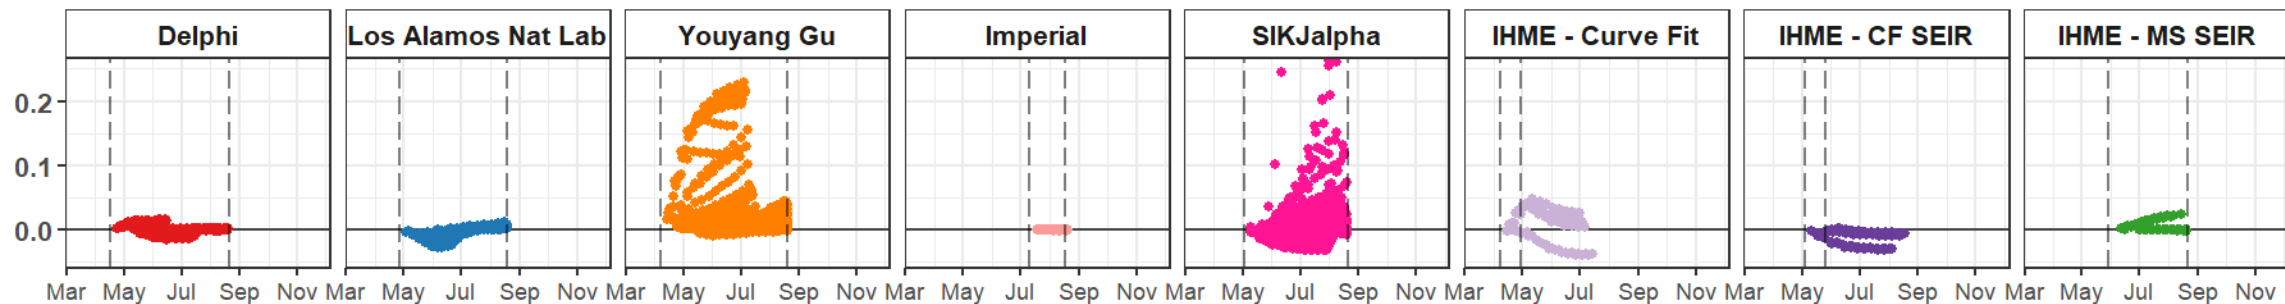

# Syria

## Current Forecast

Los Alamos Nat Lab Imperial SIKJalpha IHME - MS SEIR

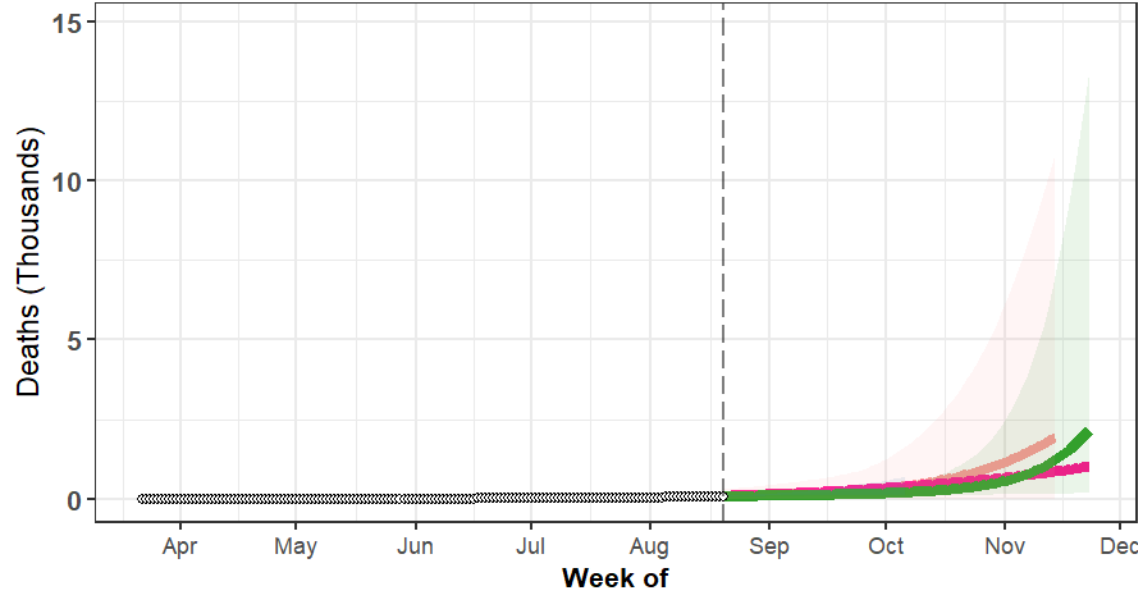

## Cumulative Out-Of-Sample Error (Post Intercept Shift)

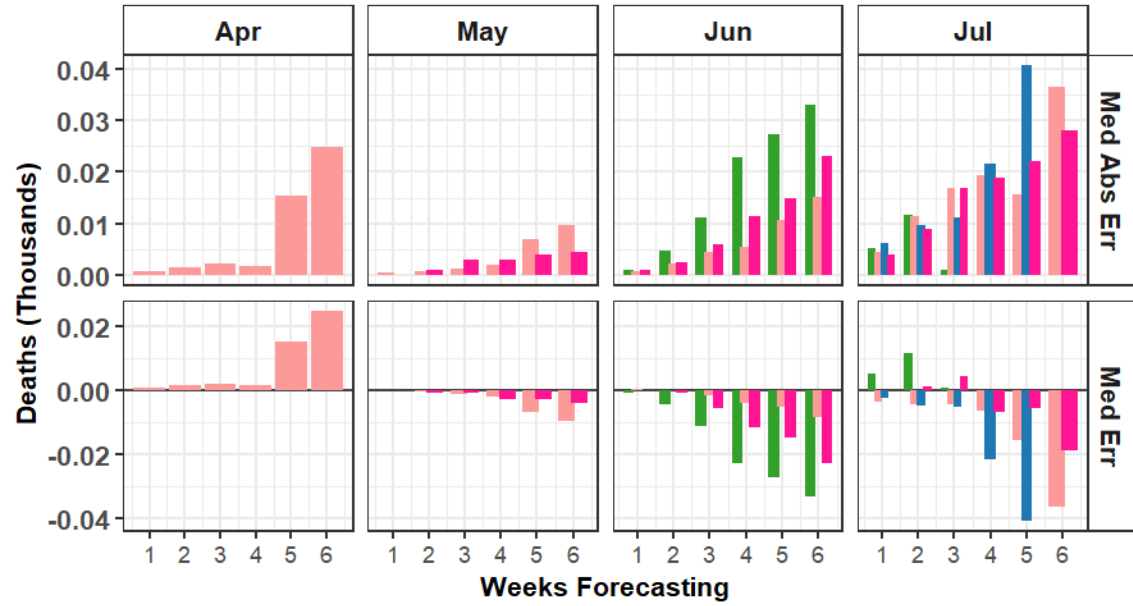

## All Model Versions

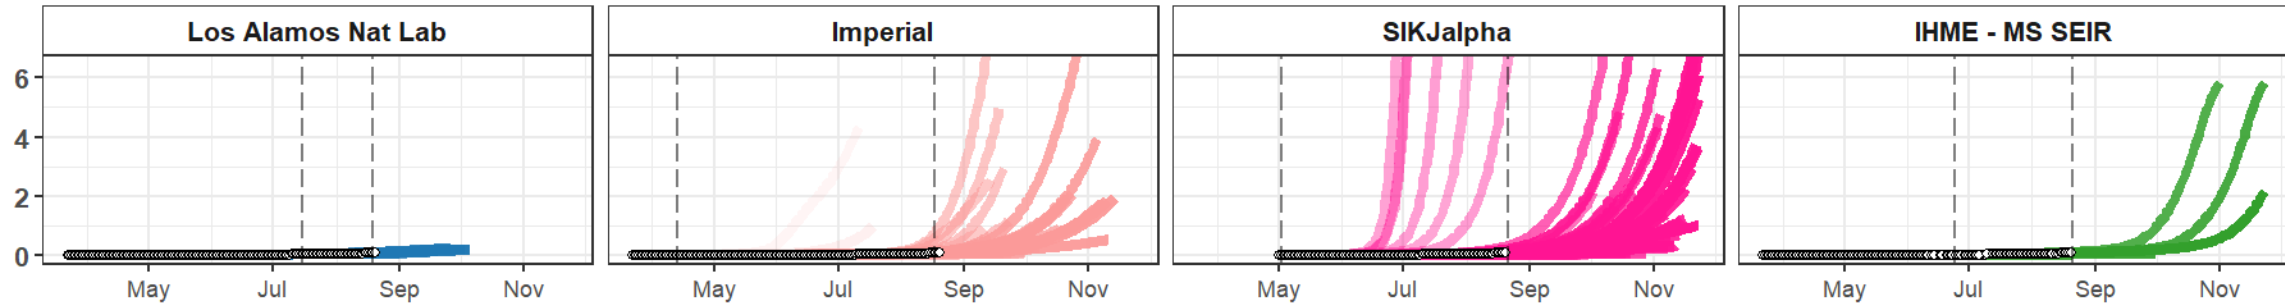

## All Cumulative Errors

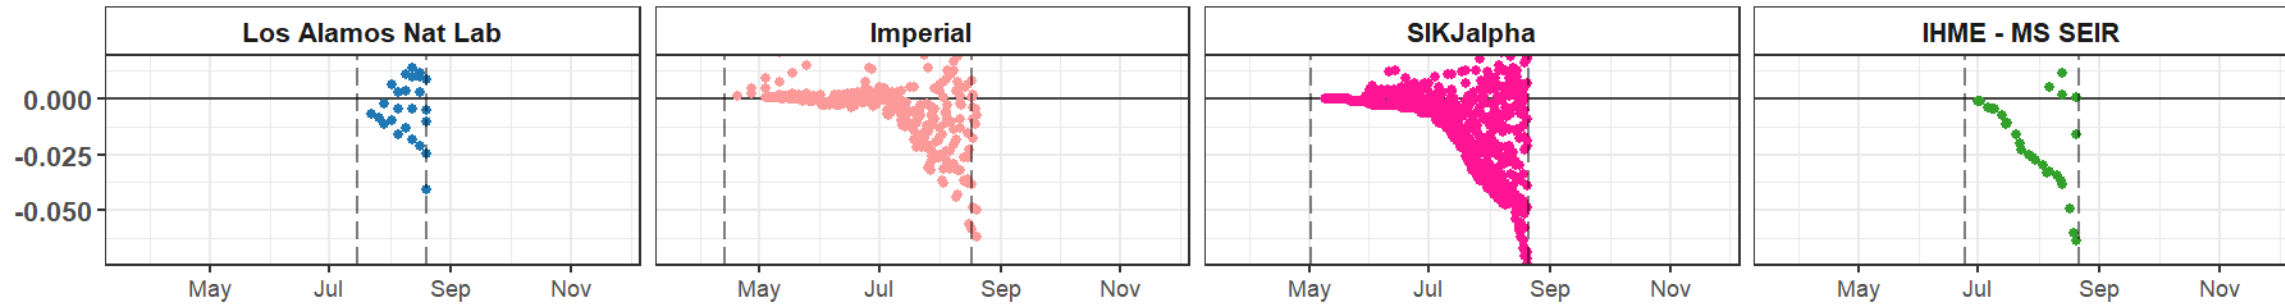

# Montenegro

## Current Forecast

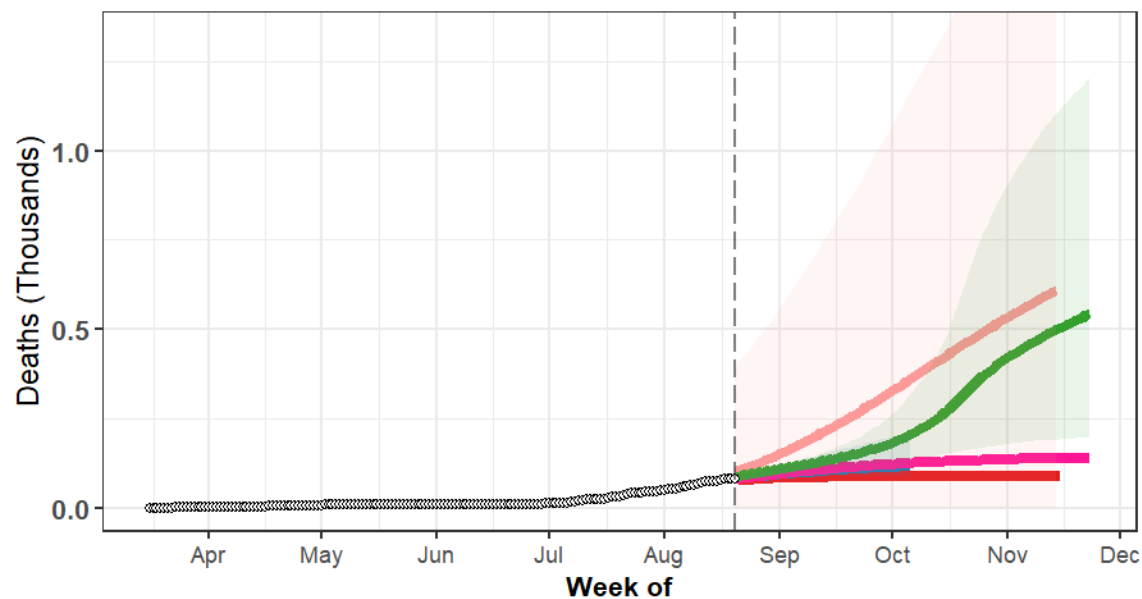

## Cumulative Out-Of-Sample Error (Post Intercept Shift)

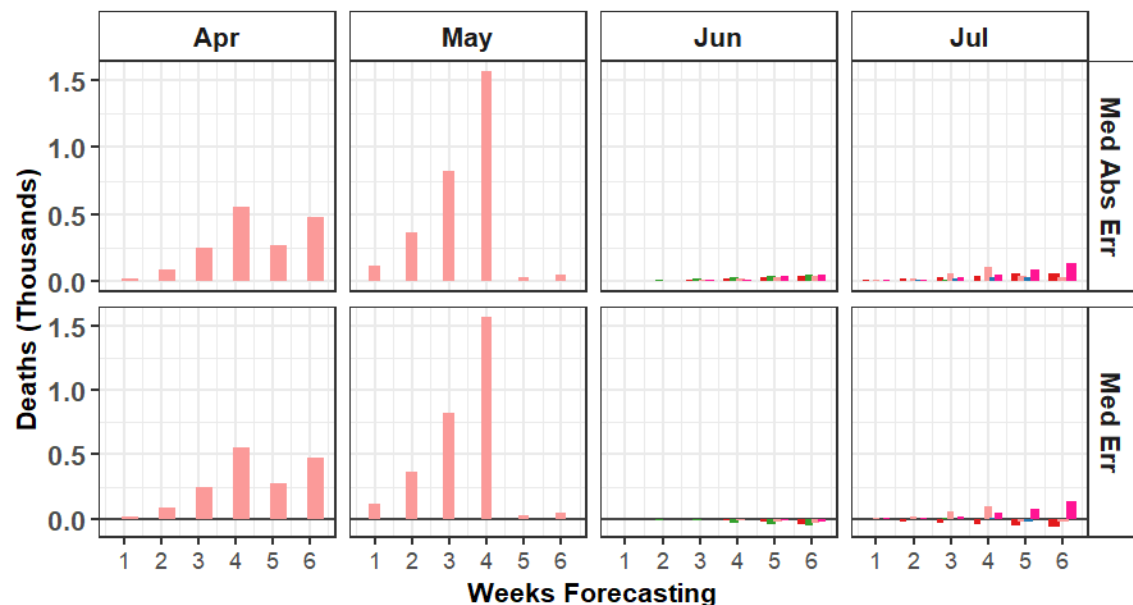

## All Model Versions

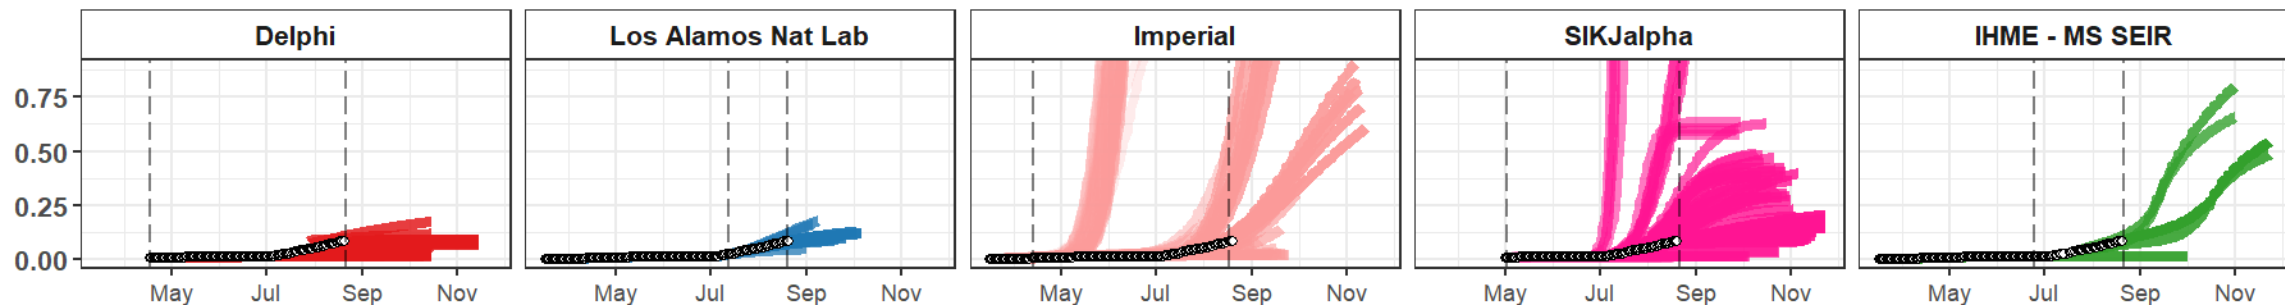

## All Cumulative Errors

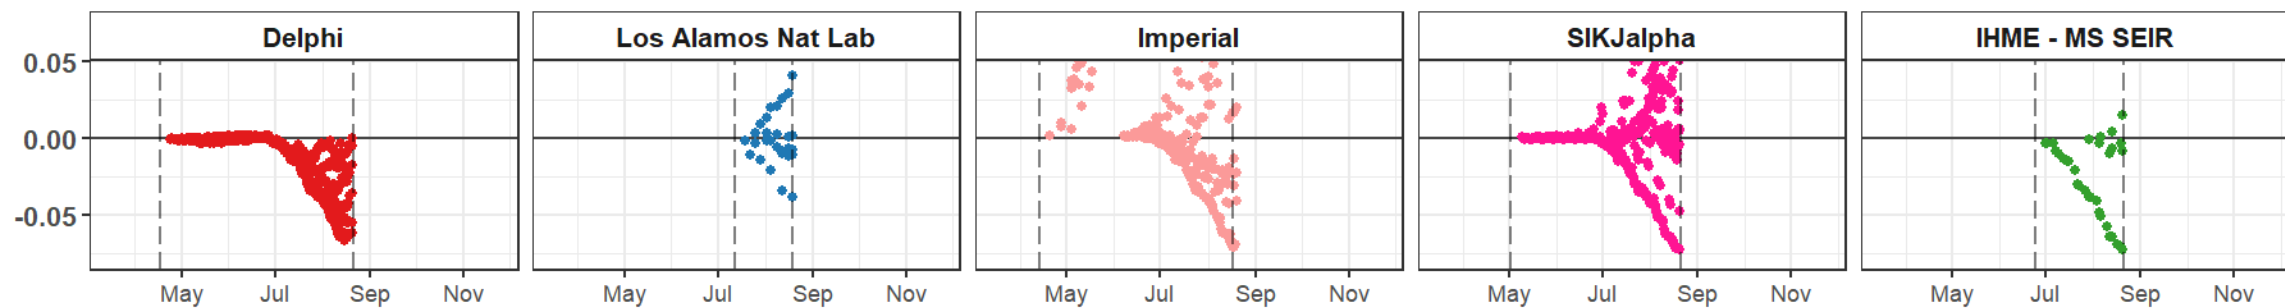

# Swaziland

## Current Forecast

Los Alamos Nat Lab Imperial SIKJalpha IHME - MS SEIR

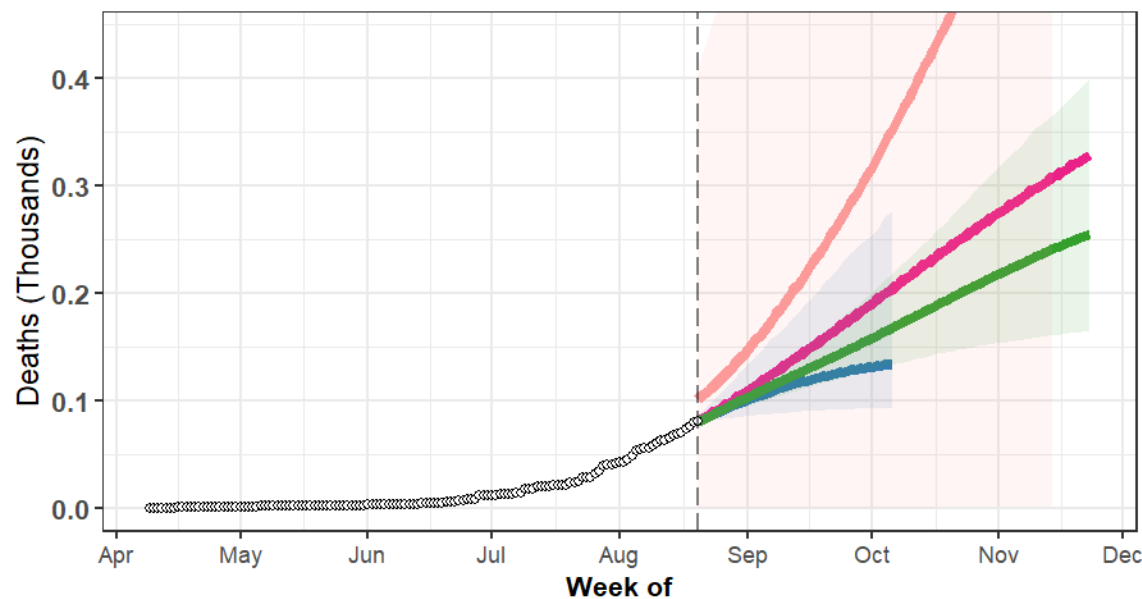

## Cumulative Out-Of-Sample Error (Post Intercept Shift)

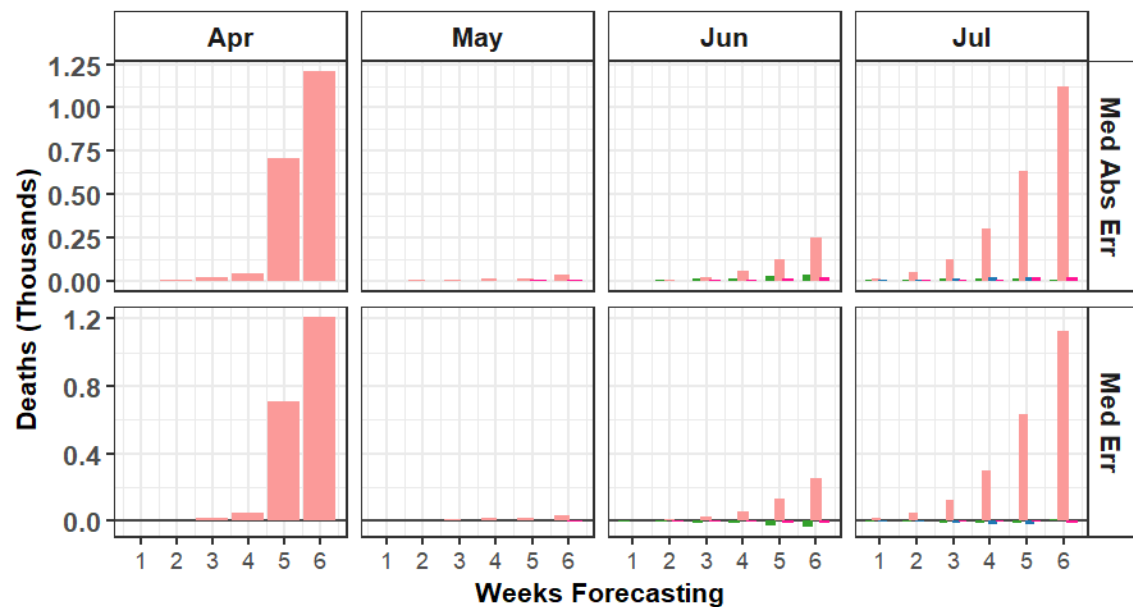

## All Model Versions

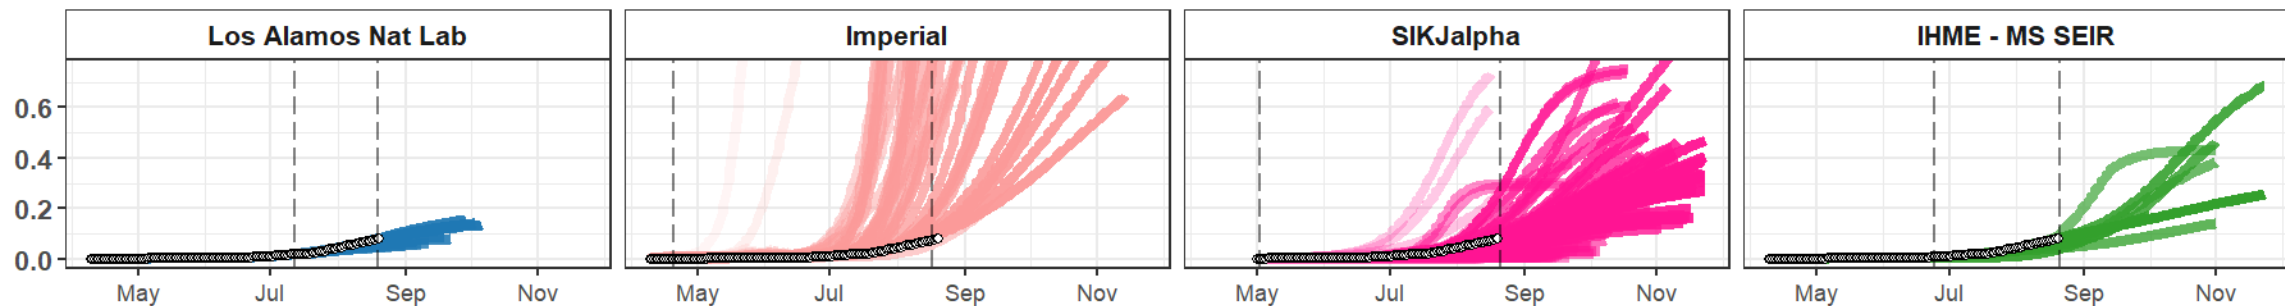

## All Cumulative Errors

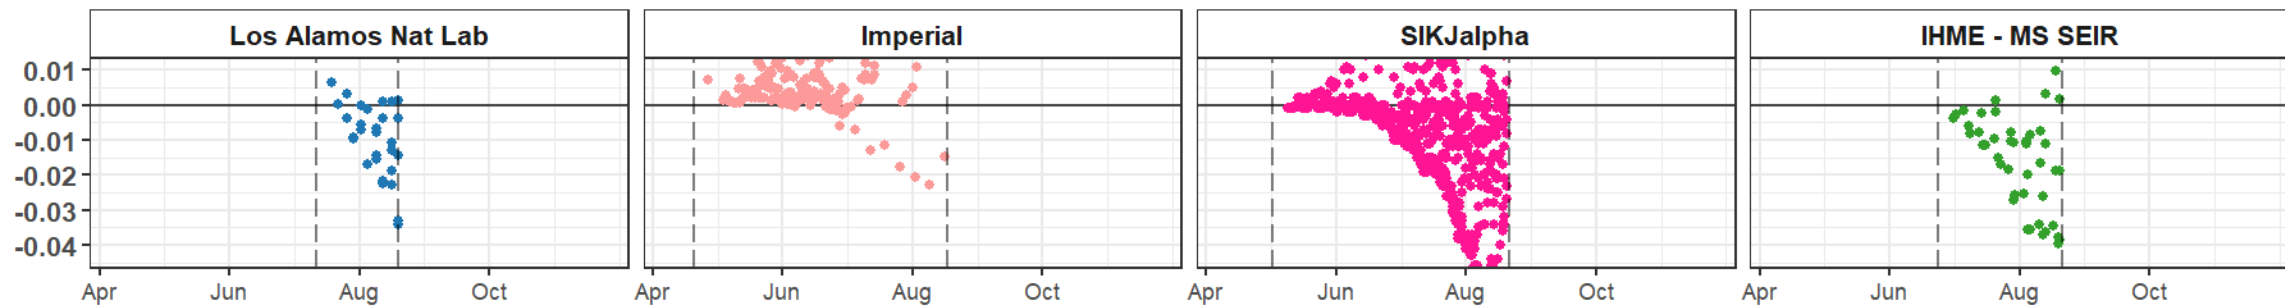

# Congo

## Current Forecast

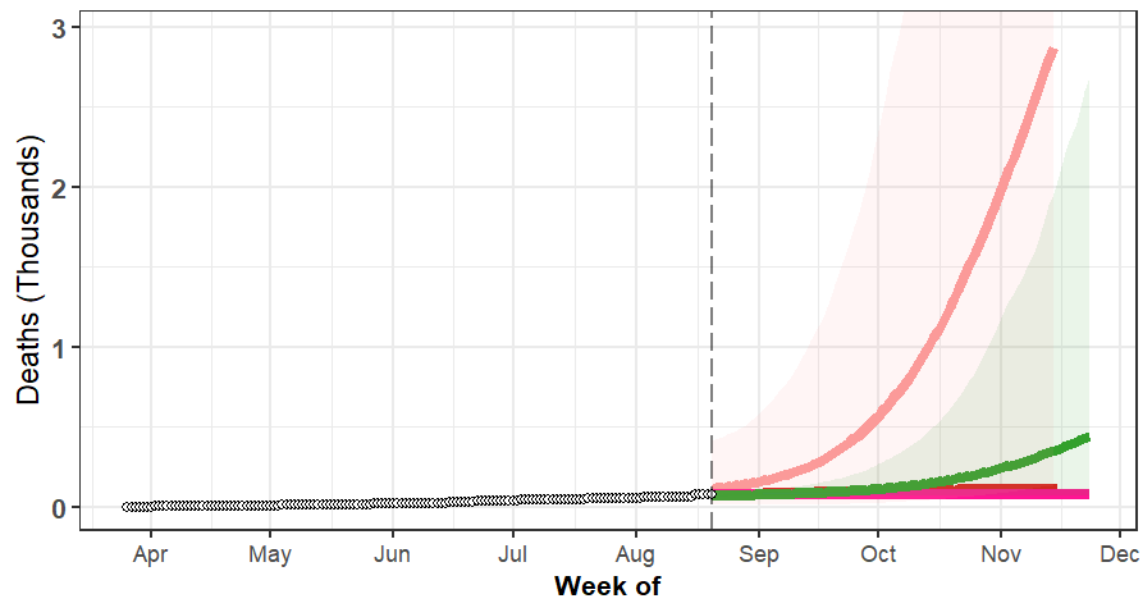

## Cumulative Out-Of-Sample Error (Post Intercept Shift)

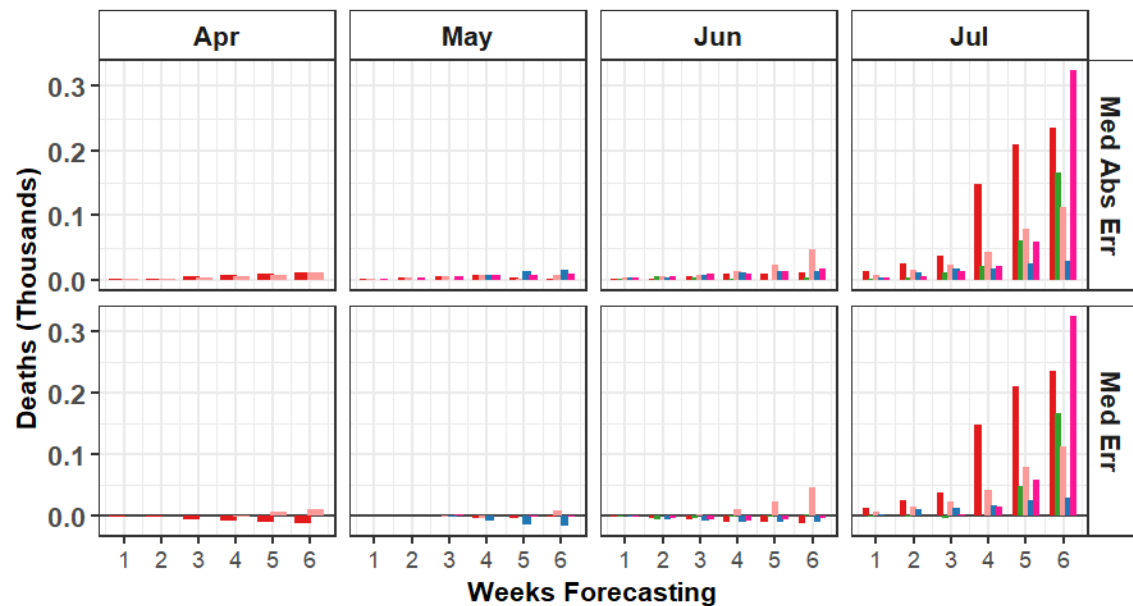

## All Model Versions

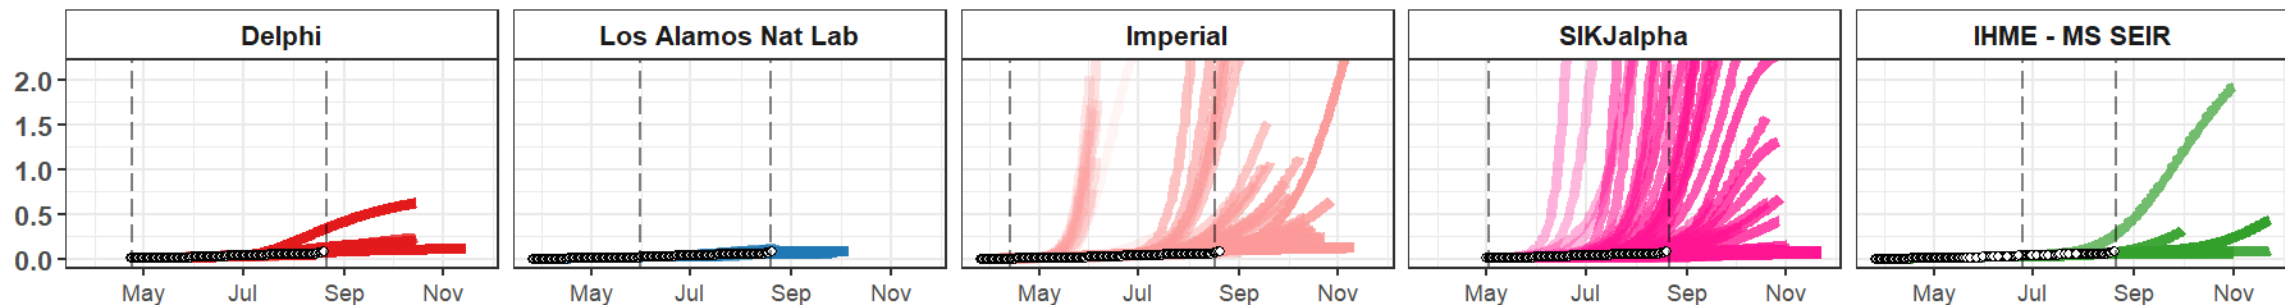

## All Cumulative Errors

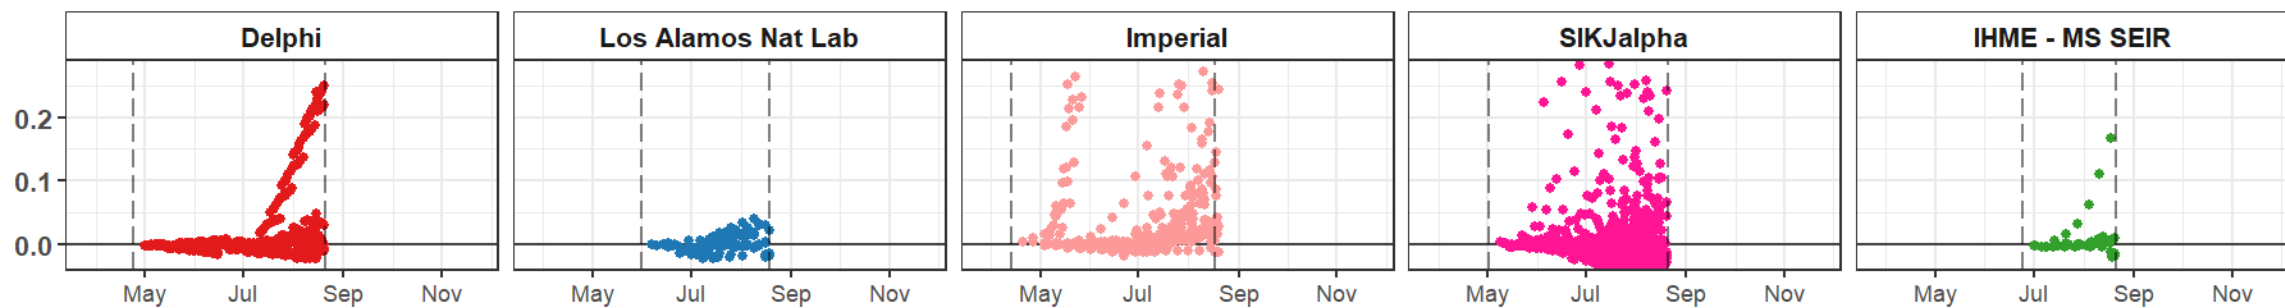

# Chad

## Current Forecast

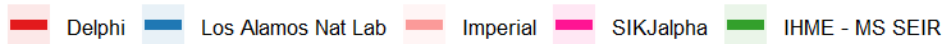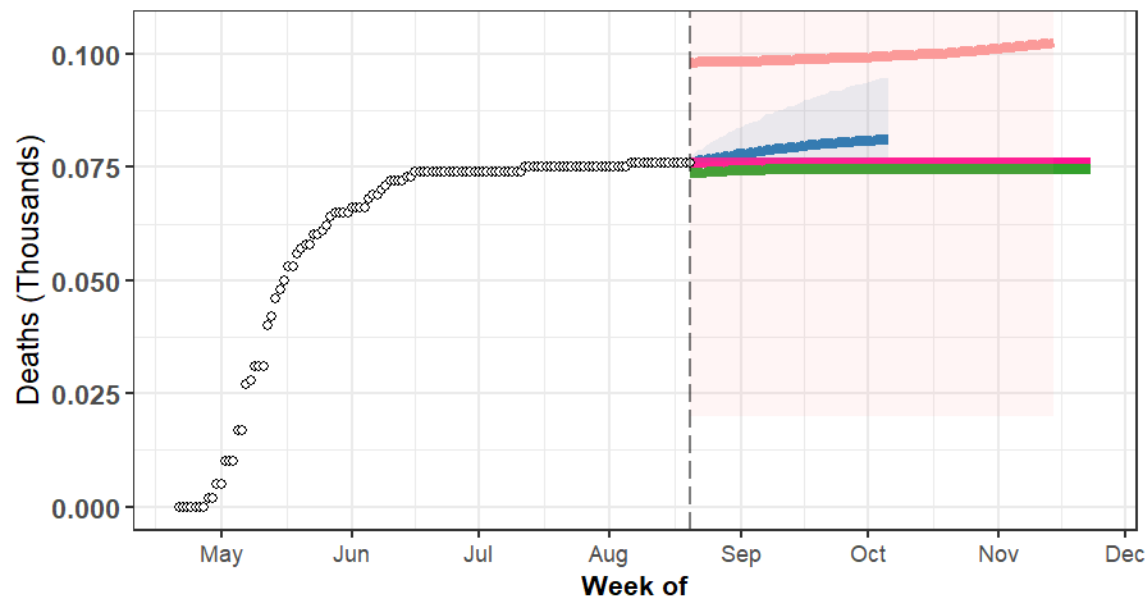

## Cumulative Out-Of-Sample Error (Post Intercept Shift)

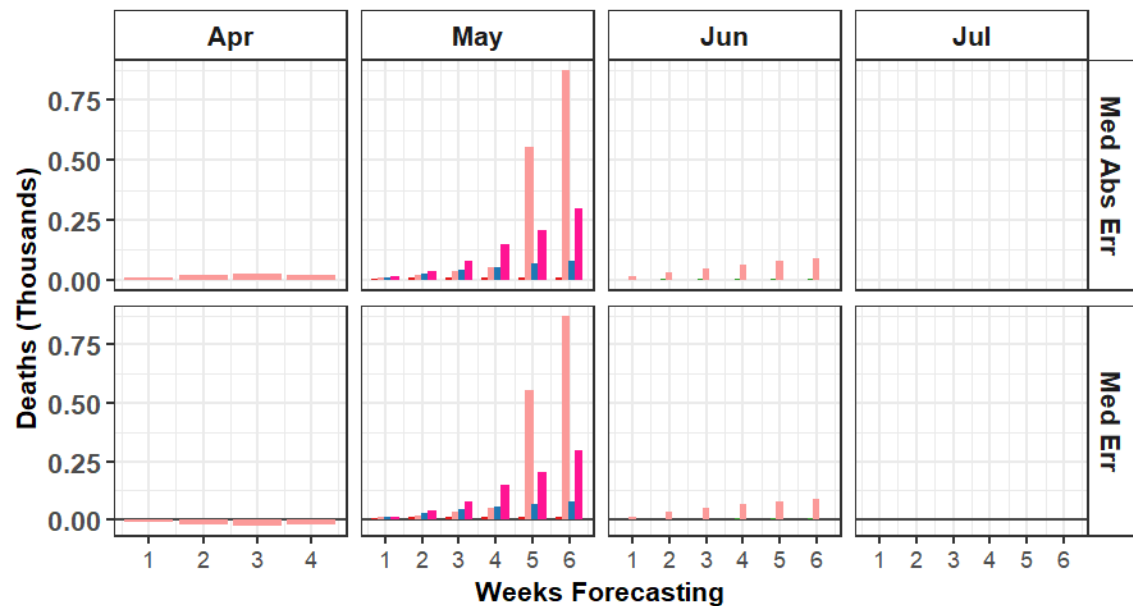

## All Model Versions

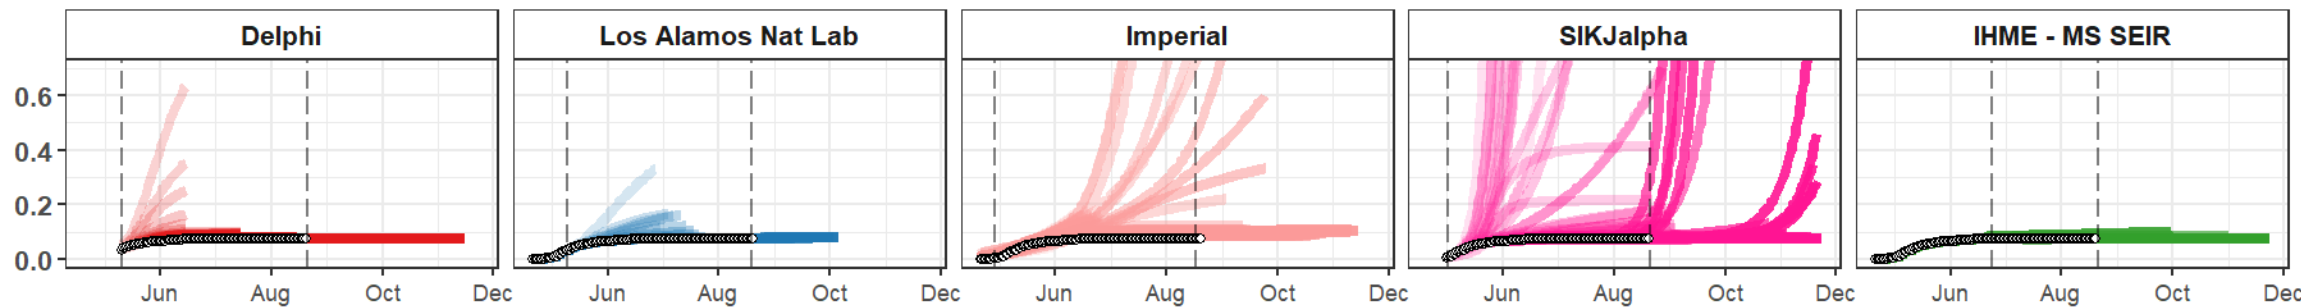

## All Cumulative Errors

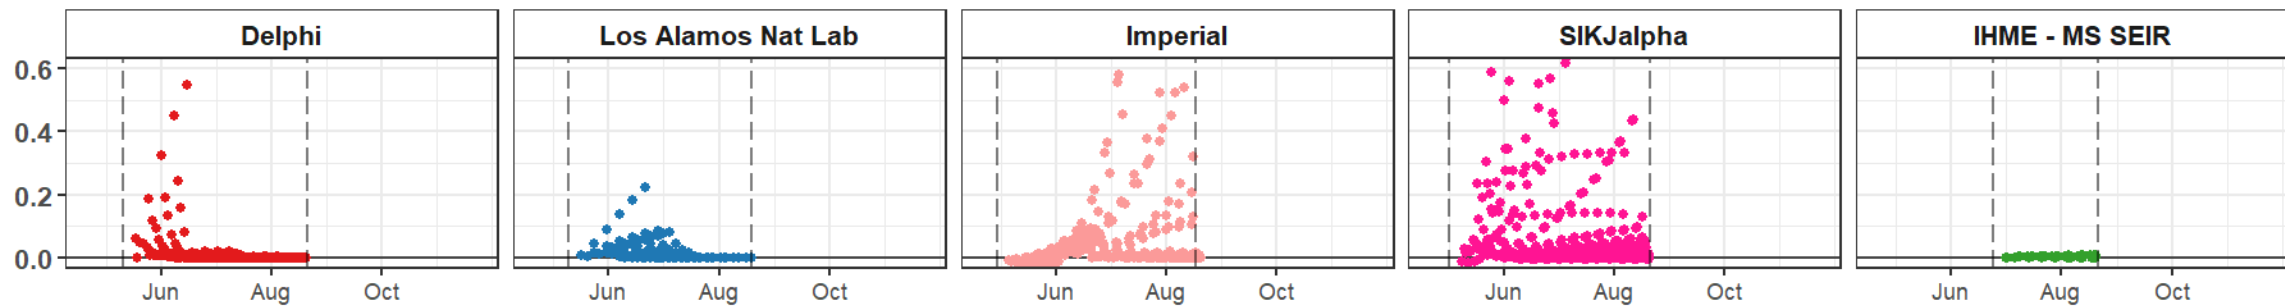

# Niger

## Current Forecast

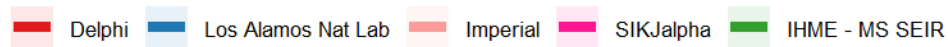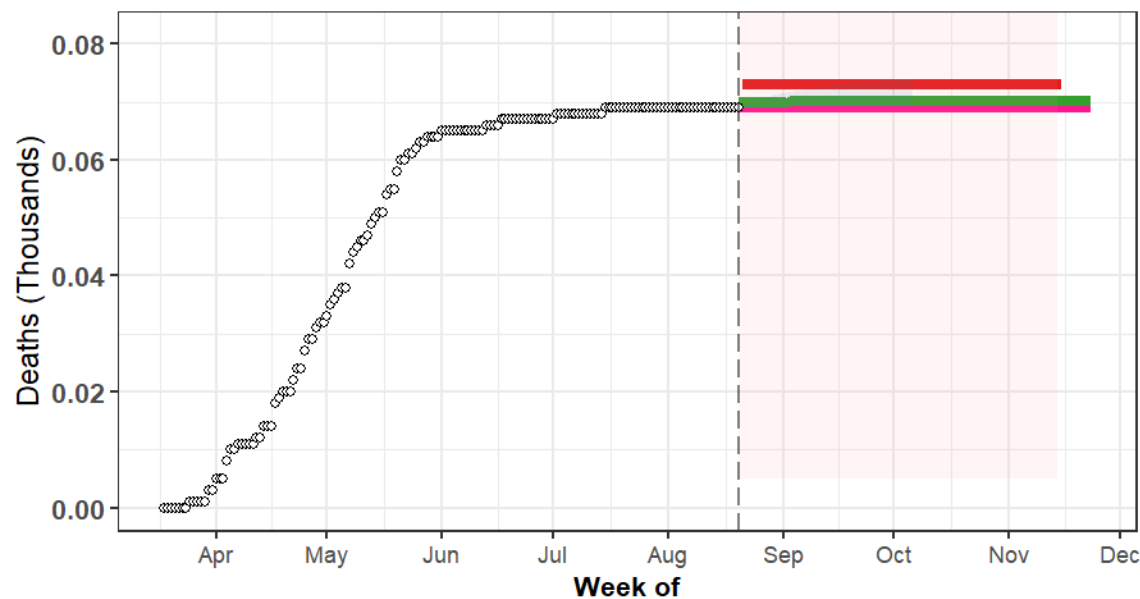

## Cumulative Out-Of-Sample Error (Post Intercept Shift)

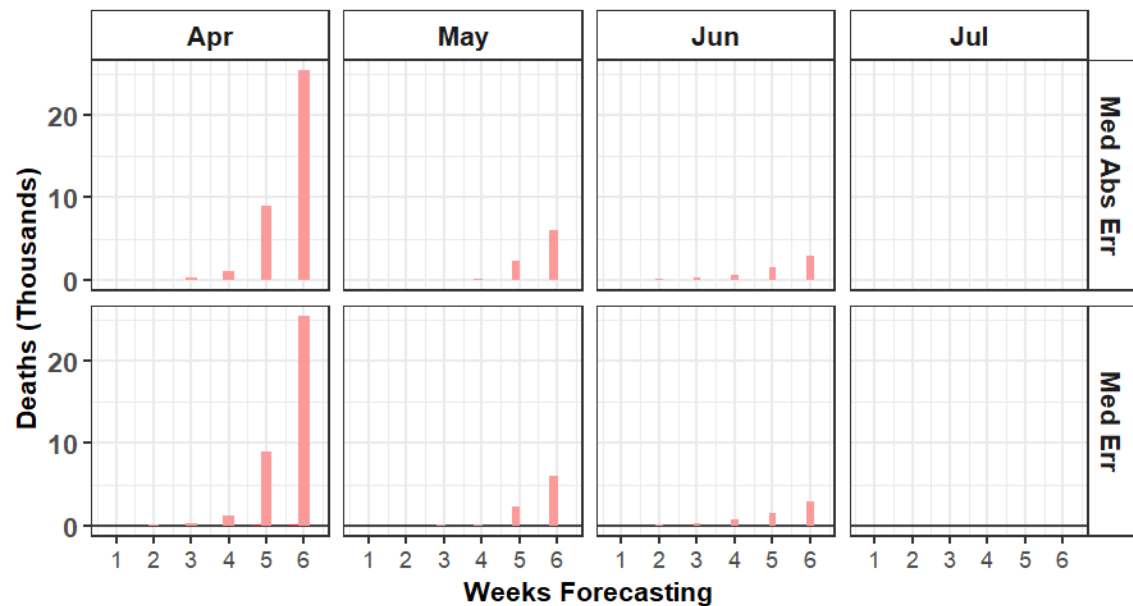

## All Model Versions

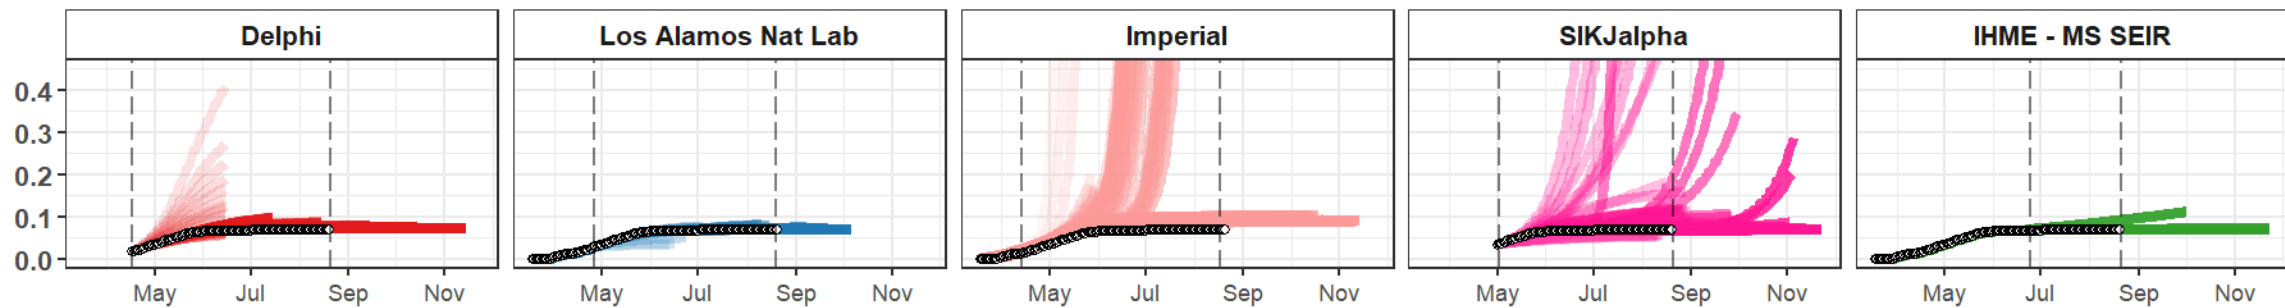

## All Cumulative Errors

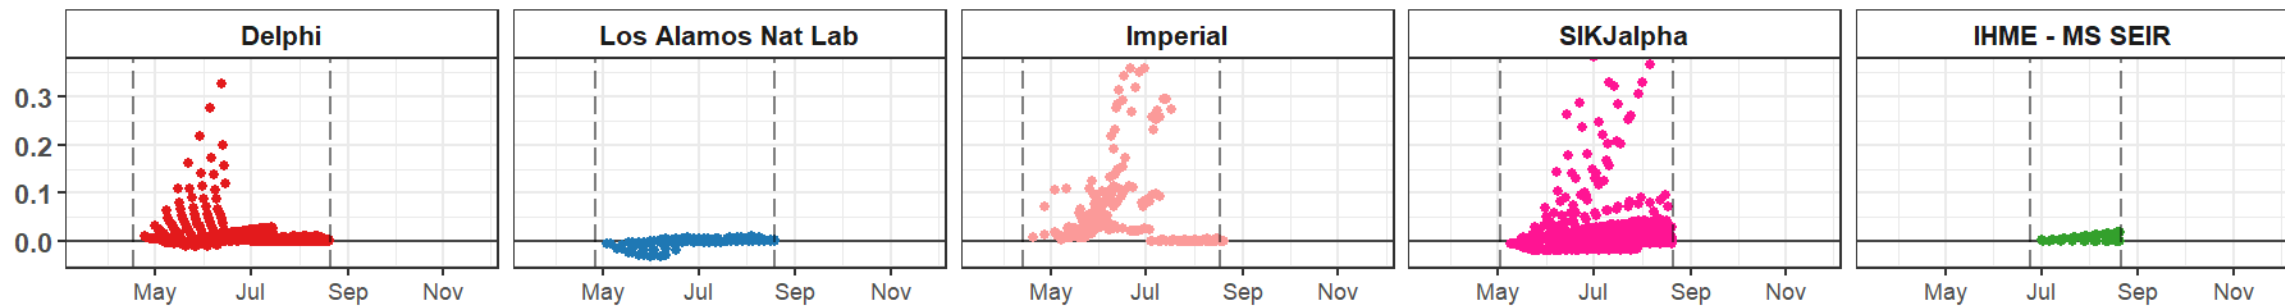

# Sierra Leone

## Current Forecast

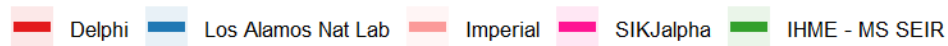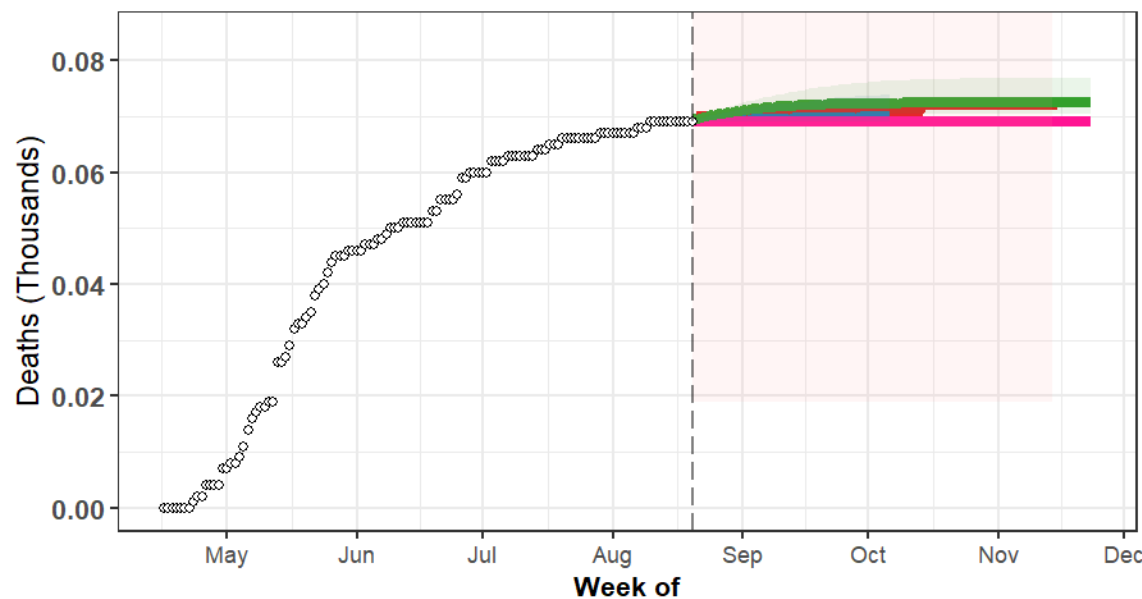

## Cumulative Out-Of-Sample Error (Post Intercept Shift)

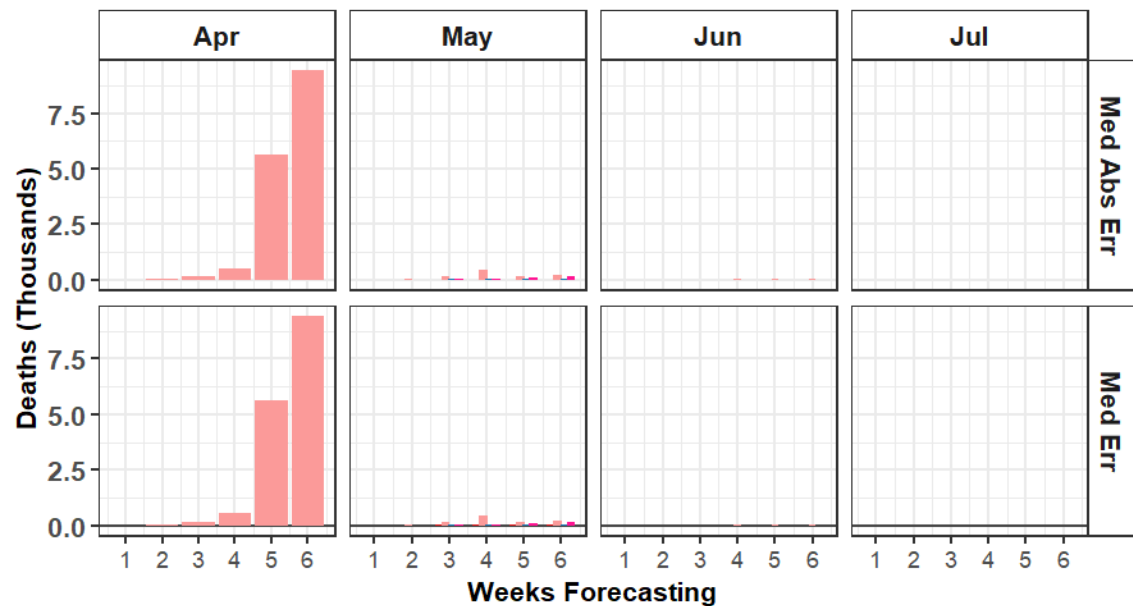

## All Model Versions

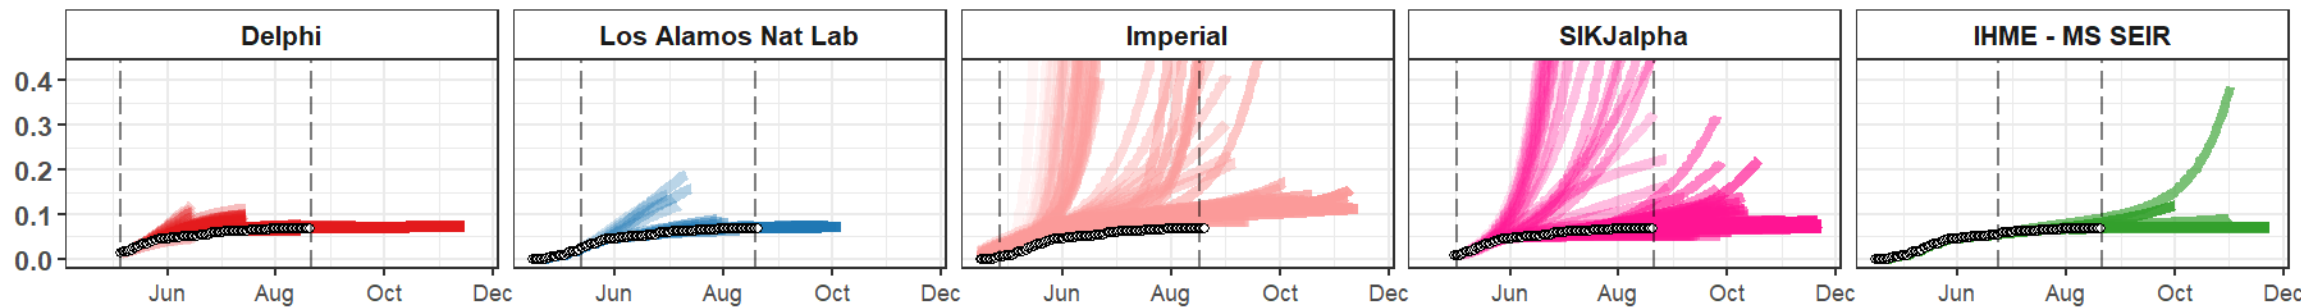

## All Cumulative Errors

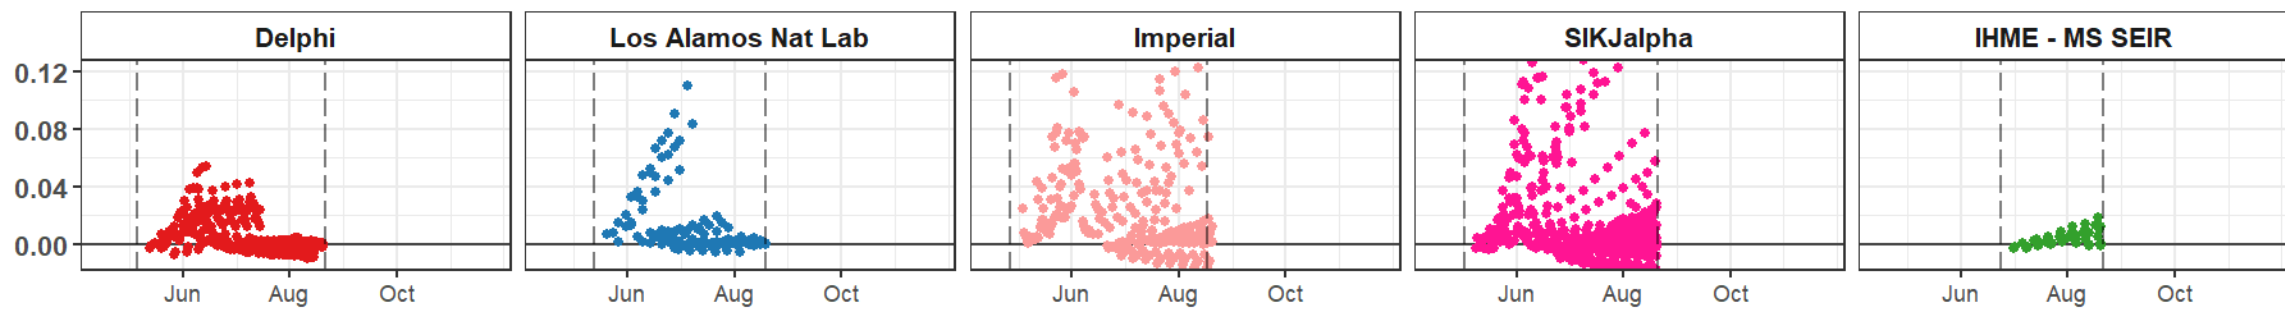



# Tajikistan

## Current Forecast

Delphi Los Alamos Nat Lab Imperial IHME - MS SEIR

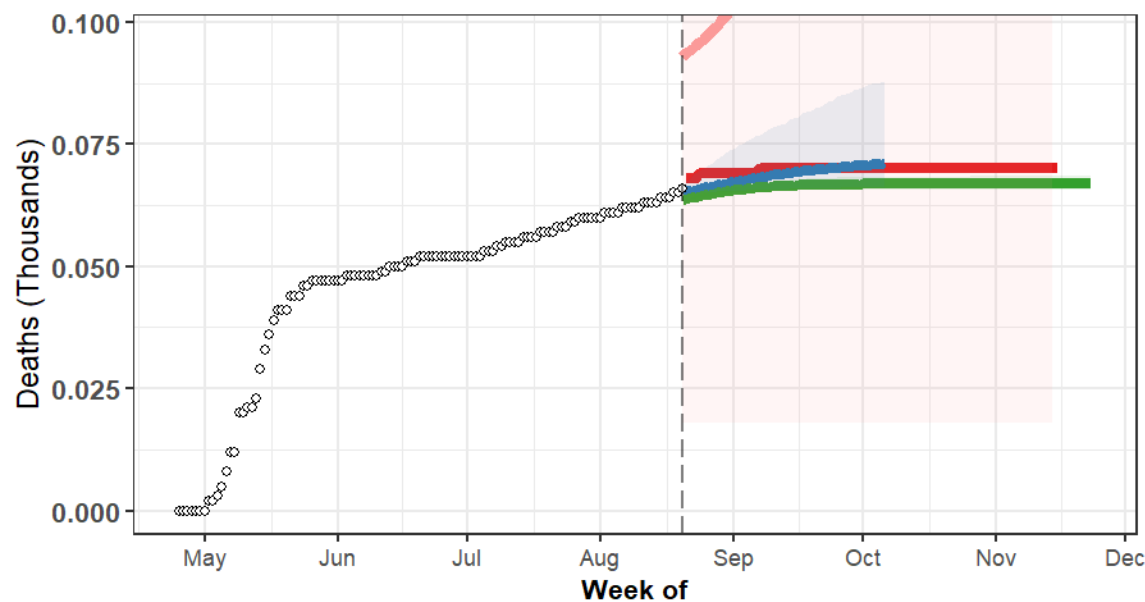

## Cumulative Out-Of-Sample Error (Post Intercept Shift)

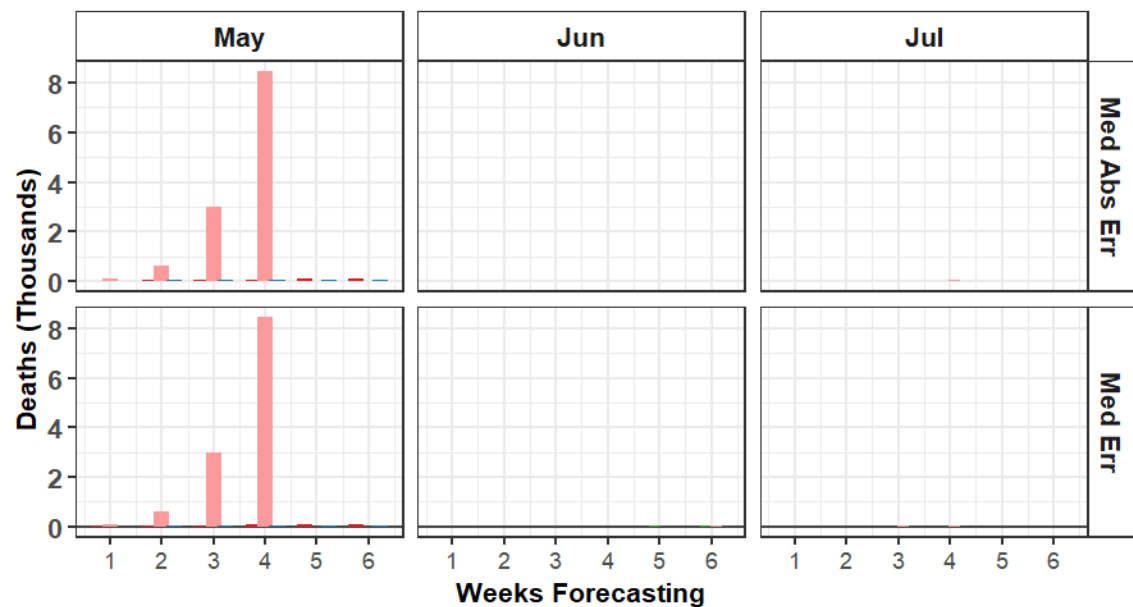

## All Model Versions

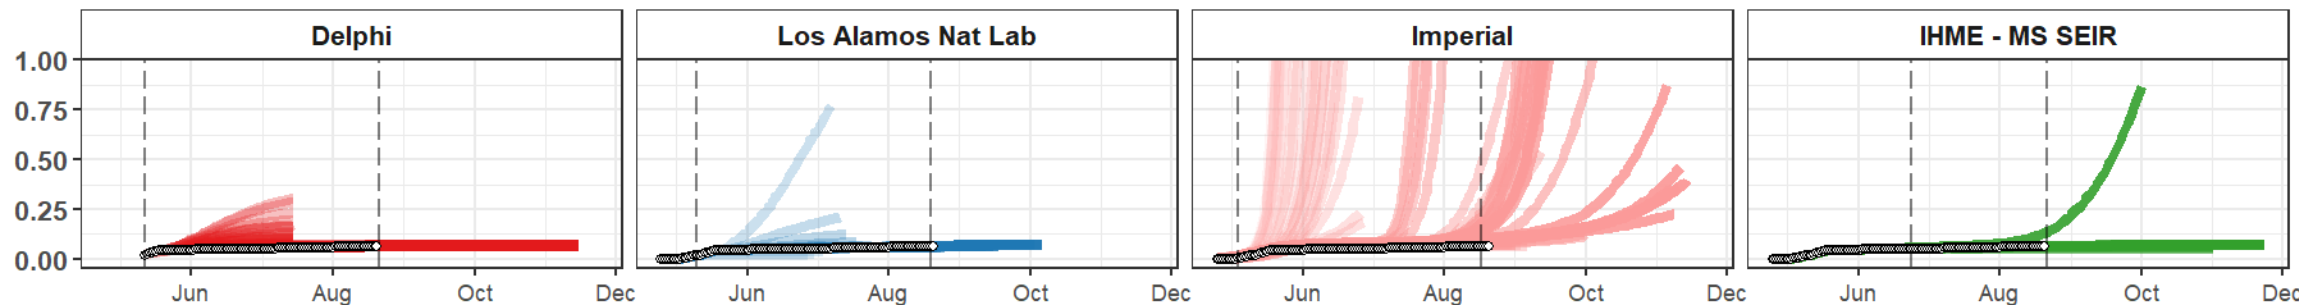

## All Cumulative Errors

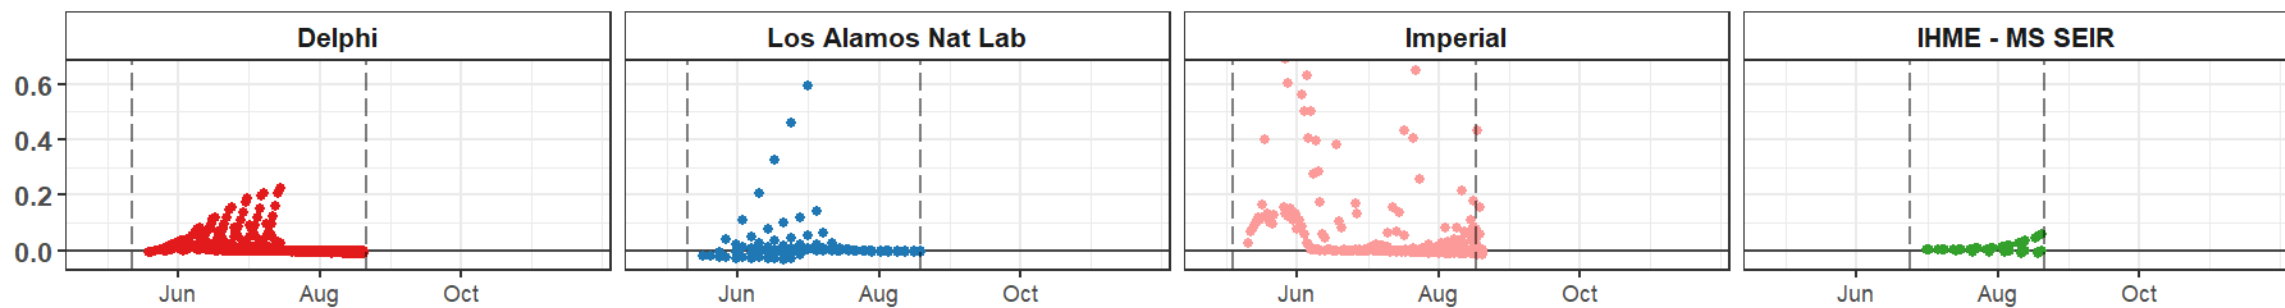

# Estonia

## Current Forecast

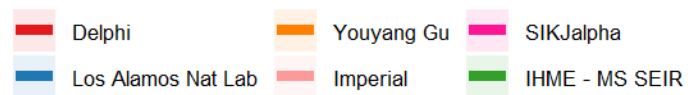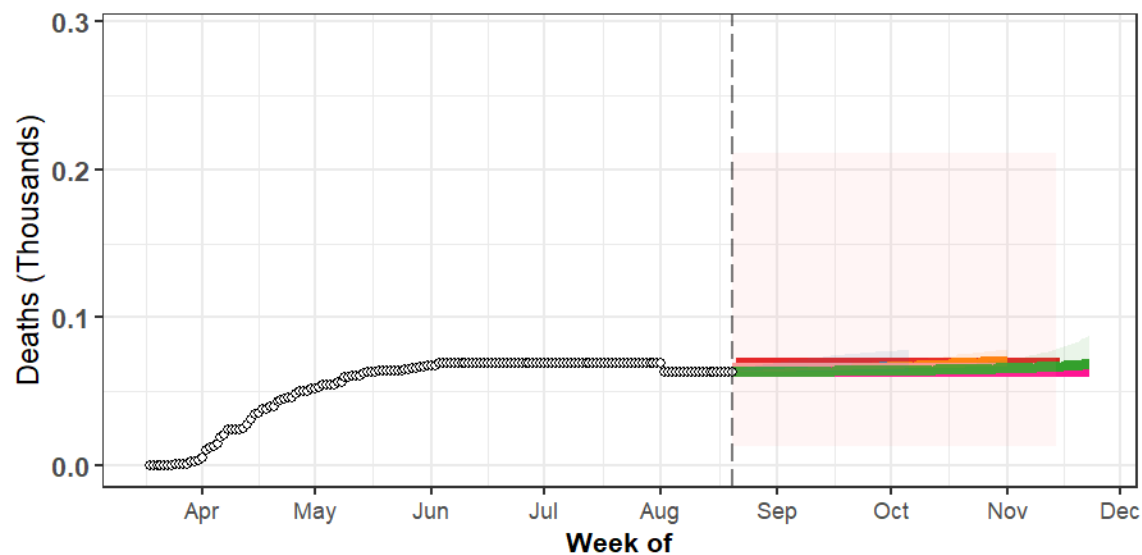

## Cumulative Out-Of-Sample Error (Post Intercept Shift)

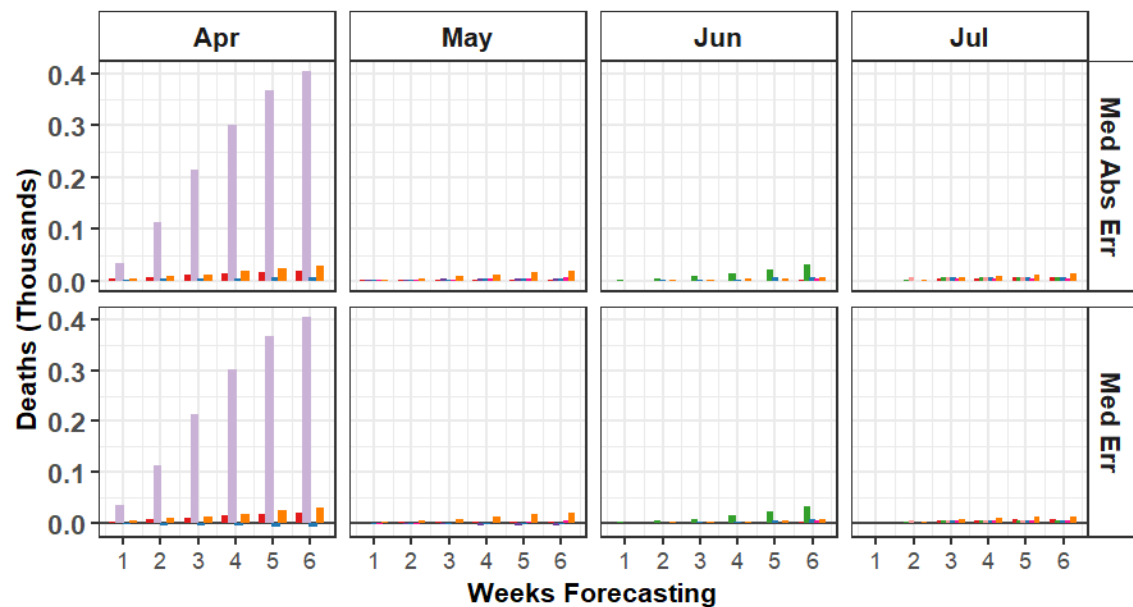

## All Model Versions

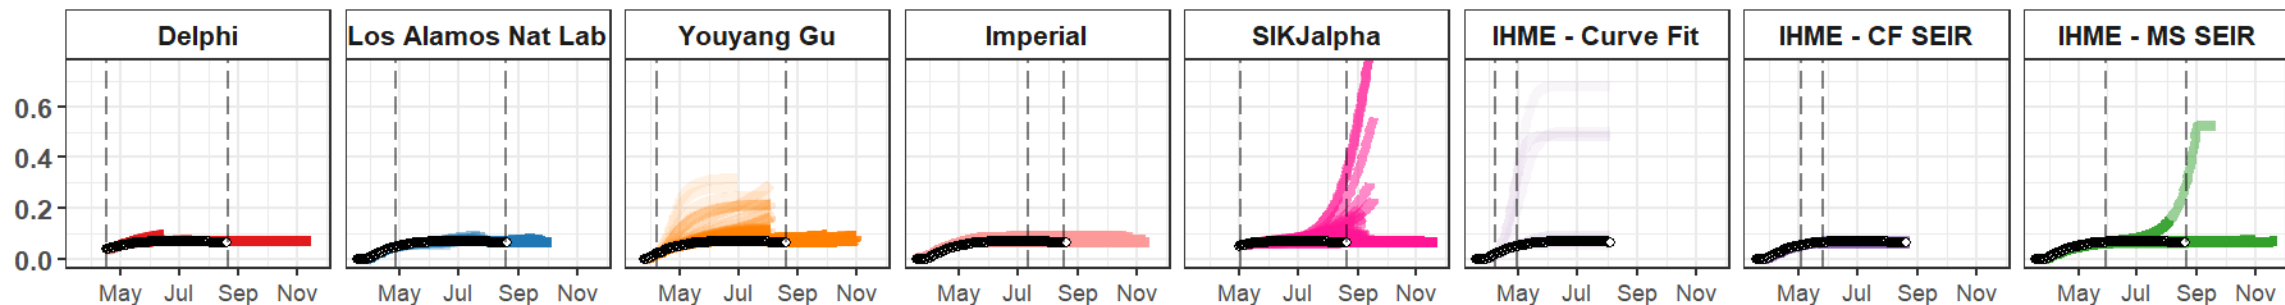

## All Cumulative Errors

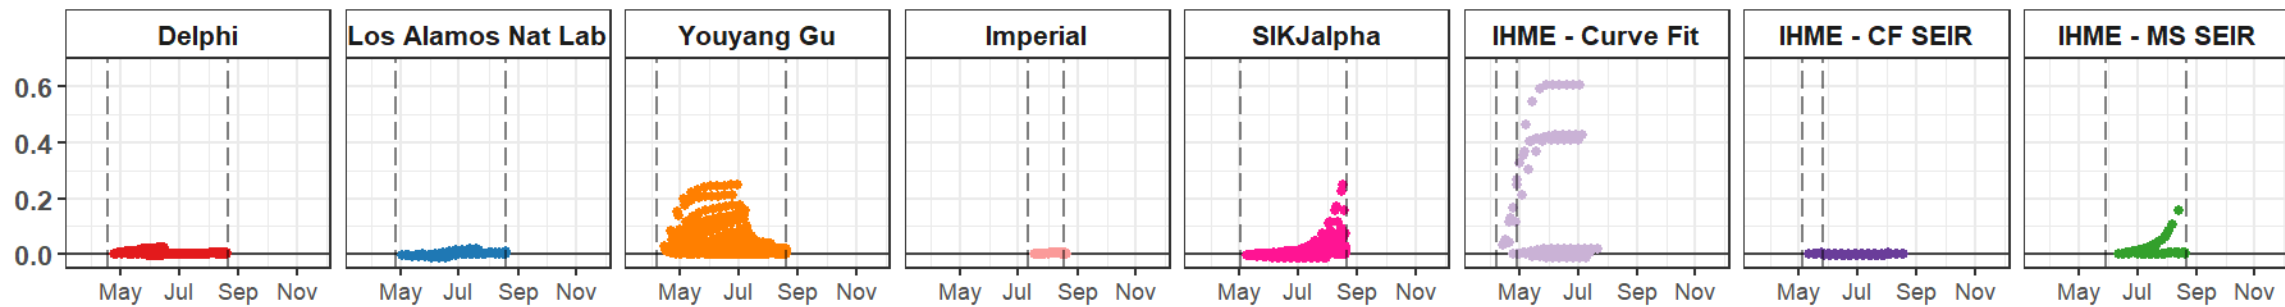

# Tunisia

## Current Forecast

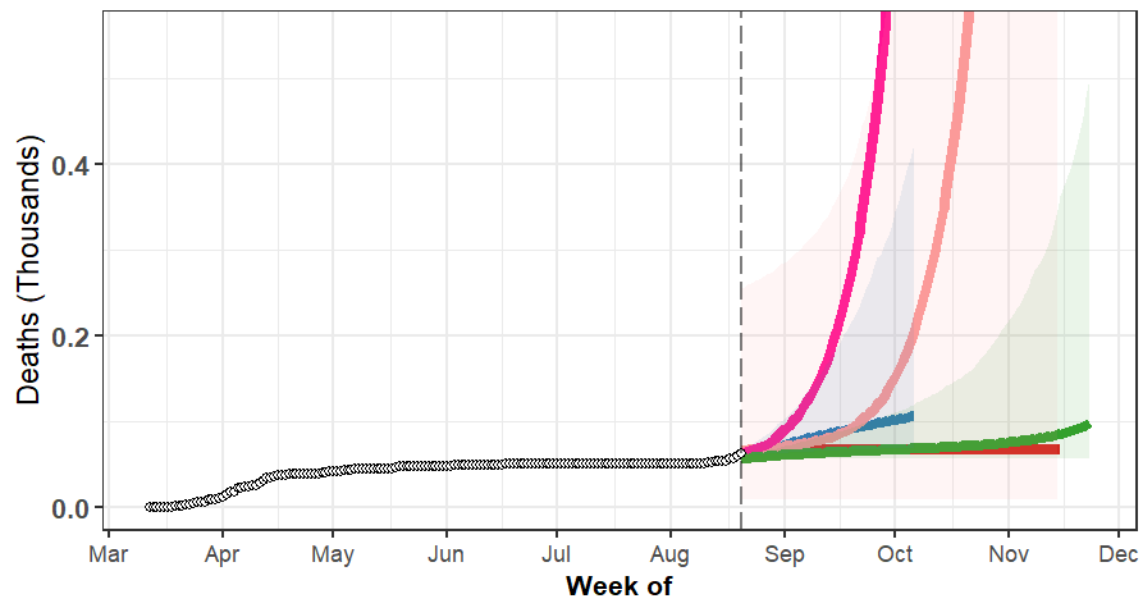

## Cumulative Out-Of-Sample Error (Post Intercept Shift)

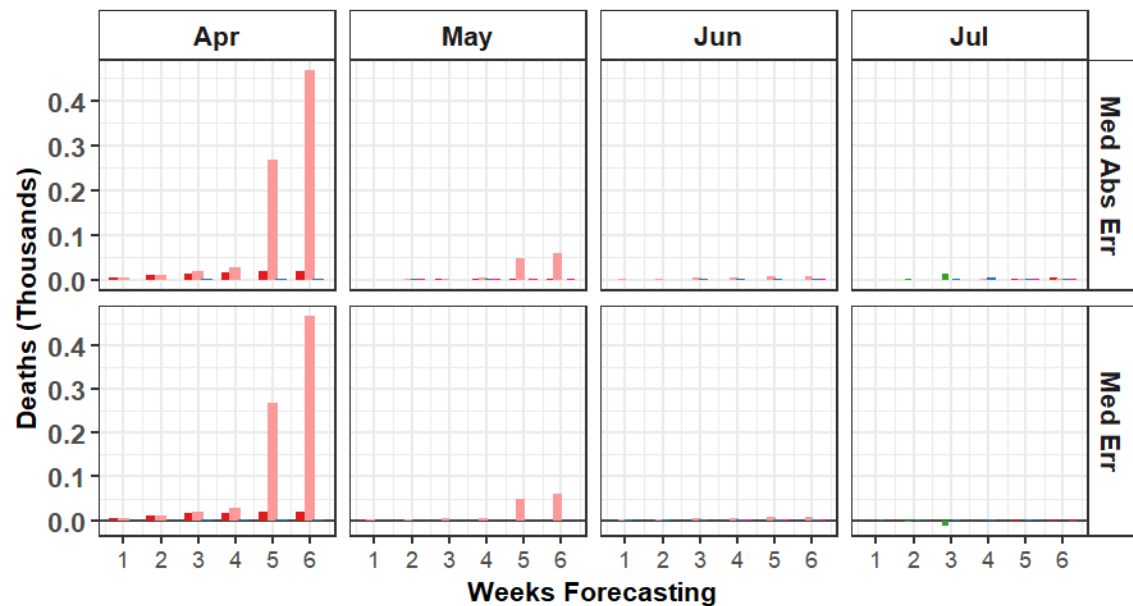

## All Model Versions

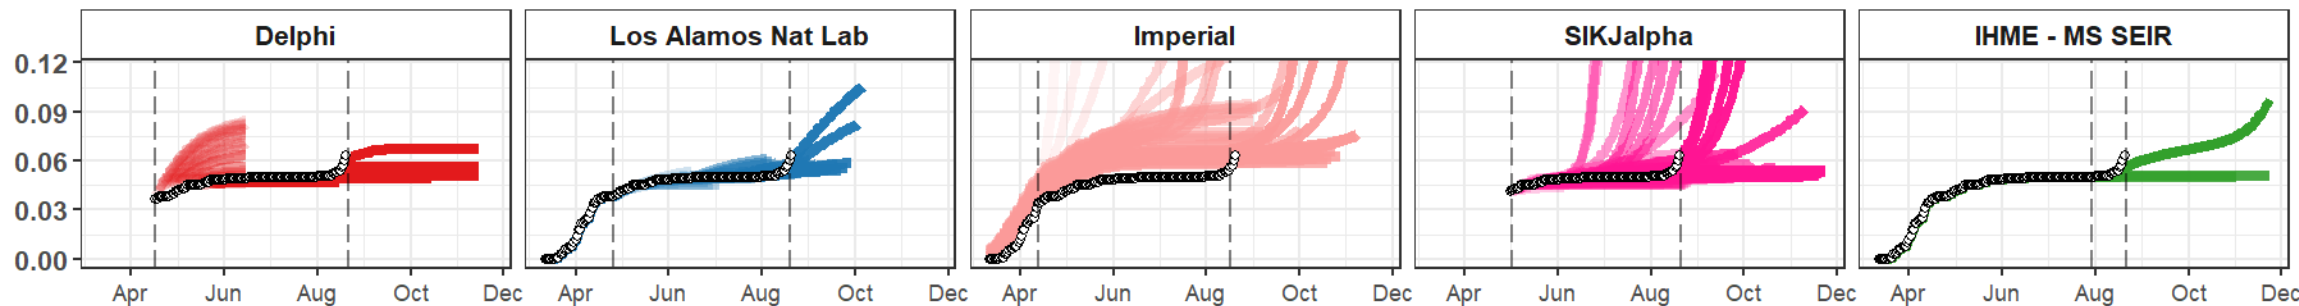

## All Cumulative Errors

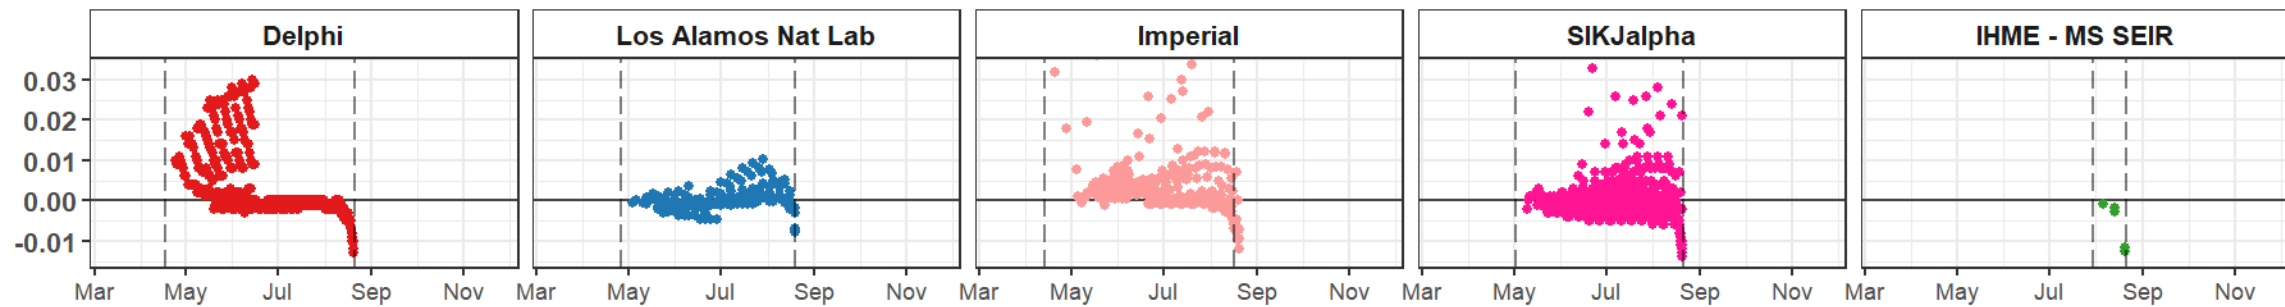

# Central African Republic

## Current Forecast

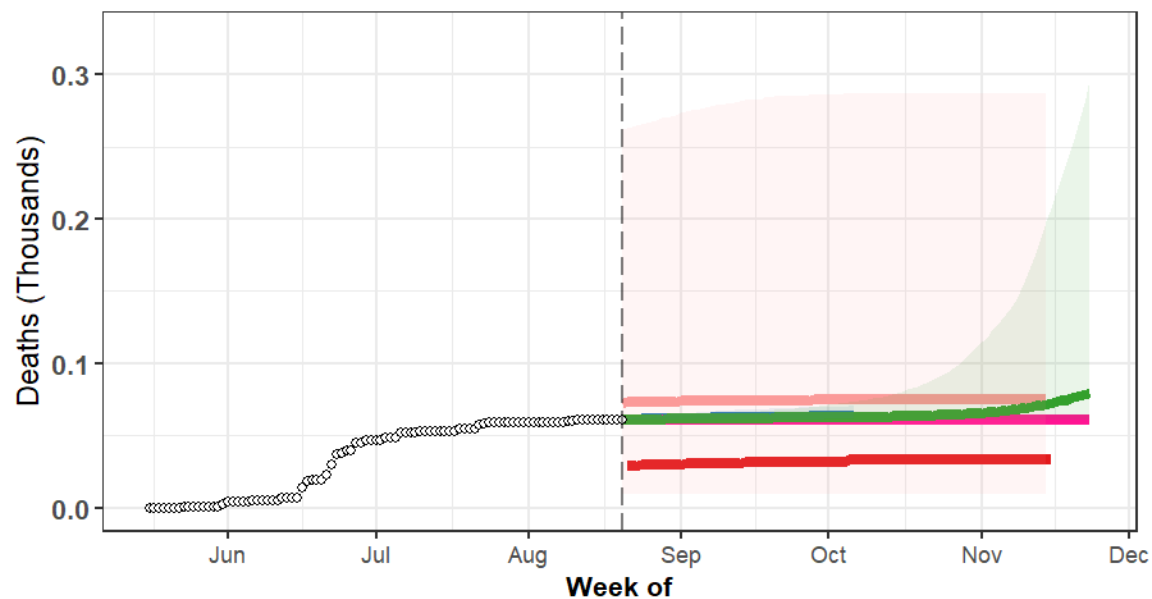

## Cumulative Out-Of-Sample Error (Post Intercept Shift)

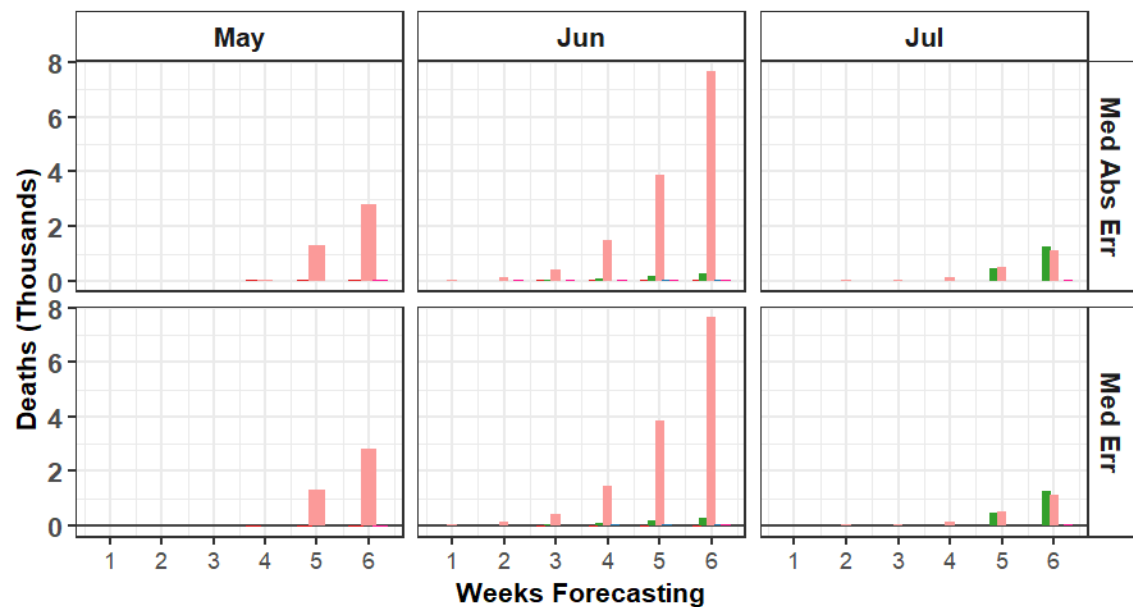

## All Model Versions

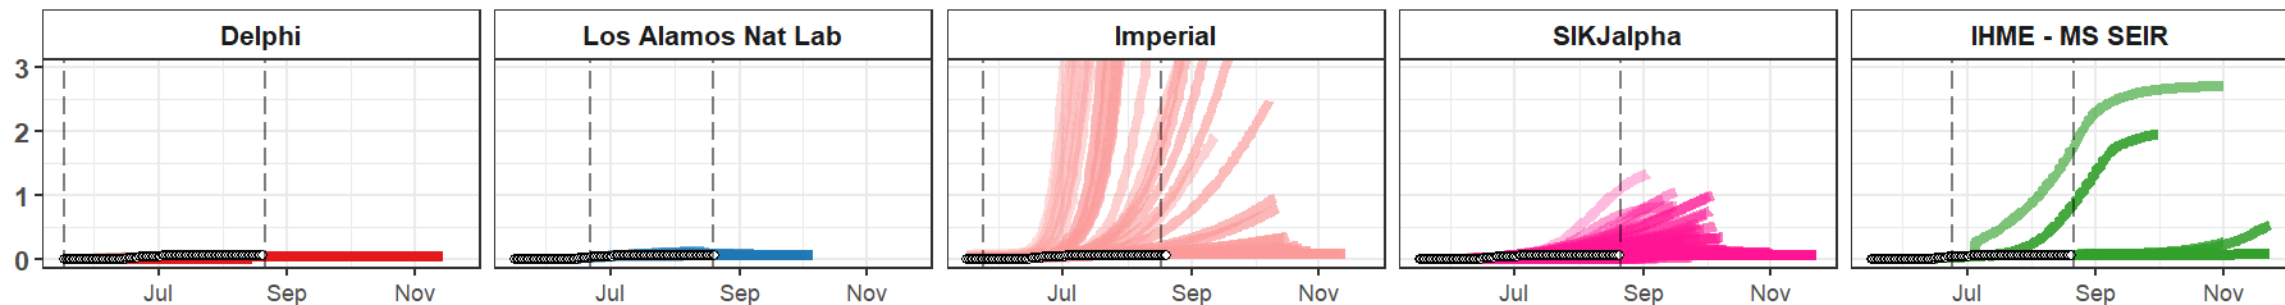

## All Cumulative Errors

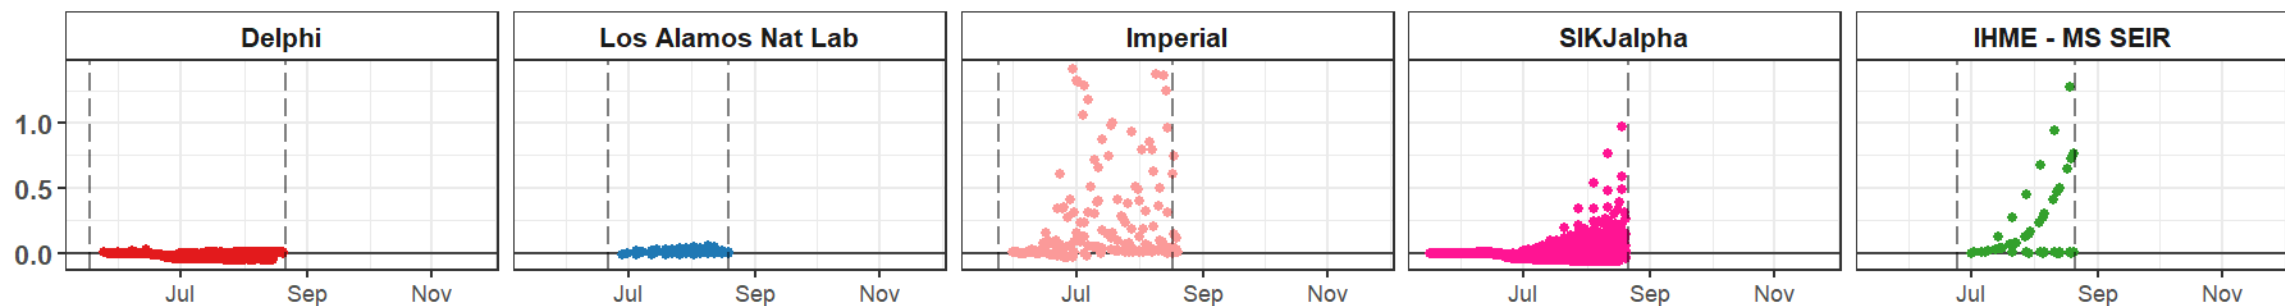

# Djibouti

## Current Forecast

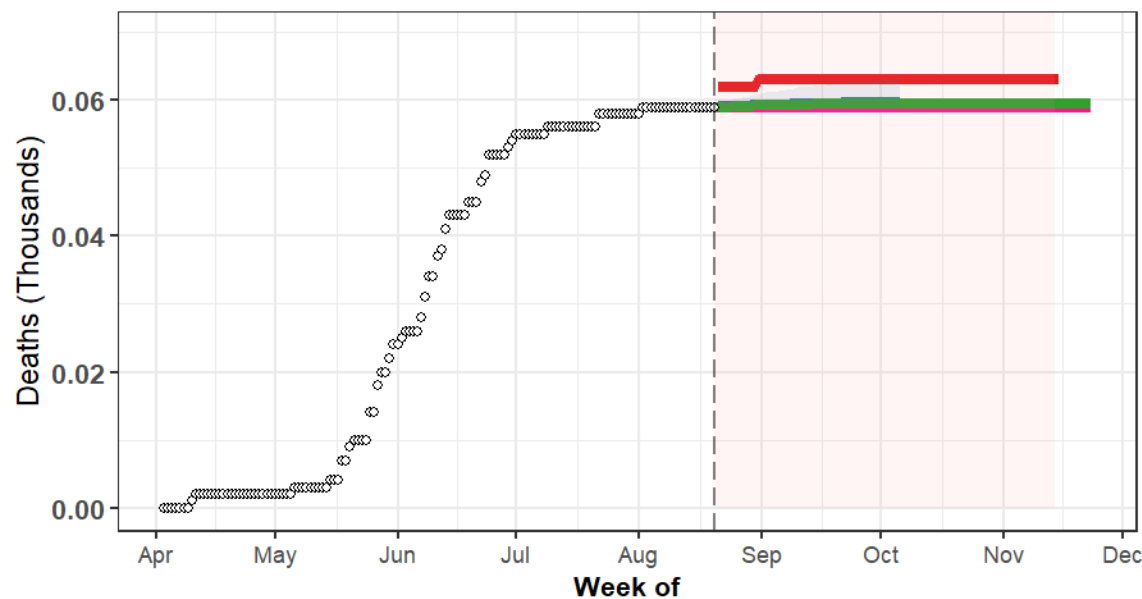

## Cumulative Out-Of-Sample Error (Post Intercept Shift)

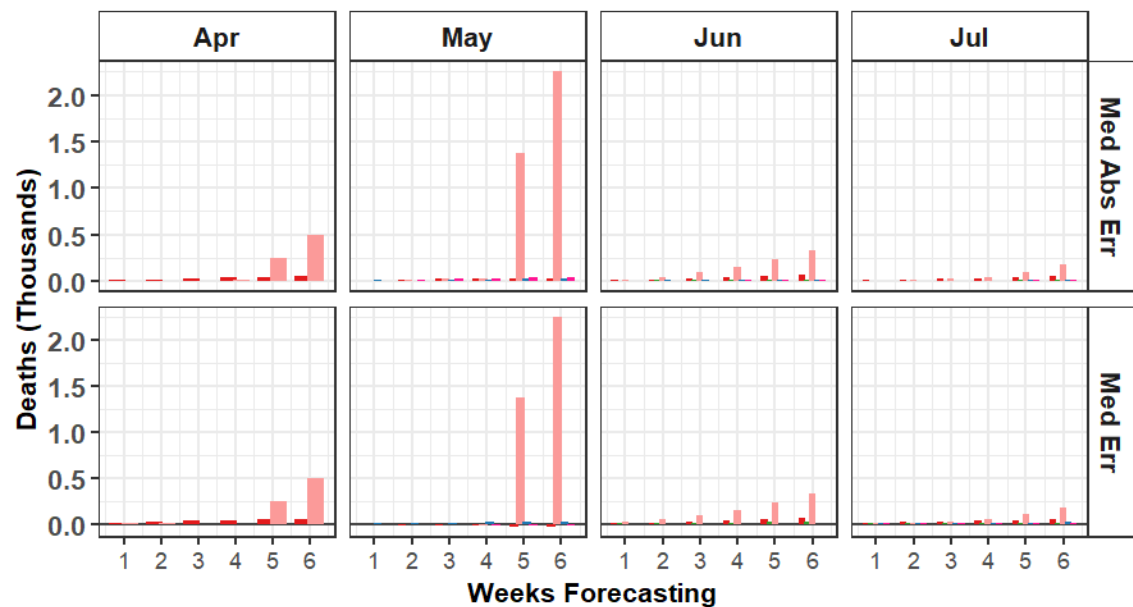

## All Model Versions

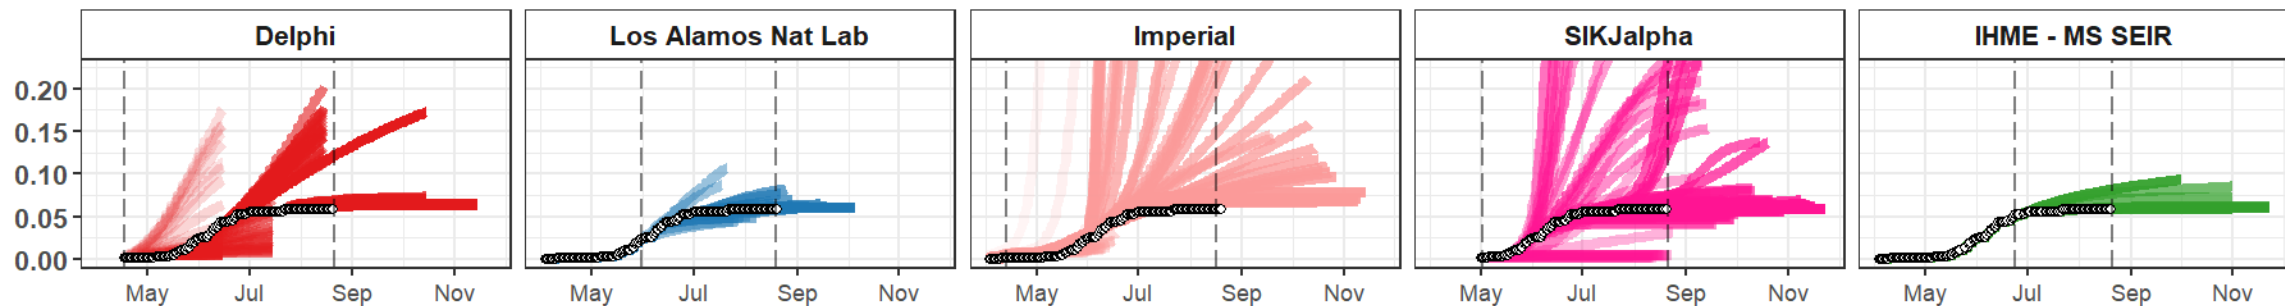

## All Cumulative Errors

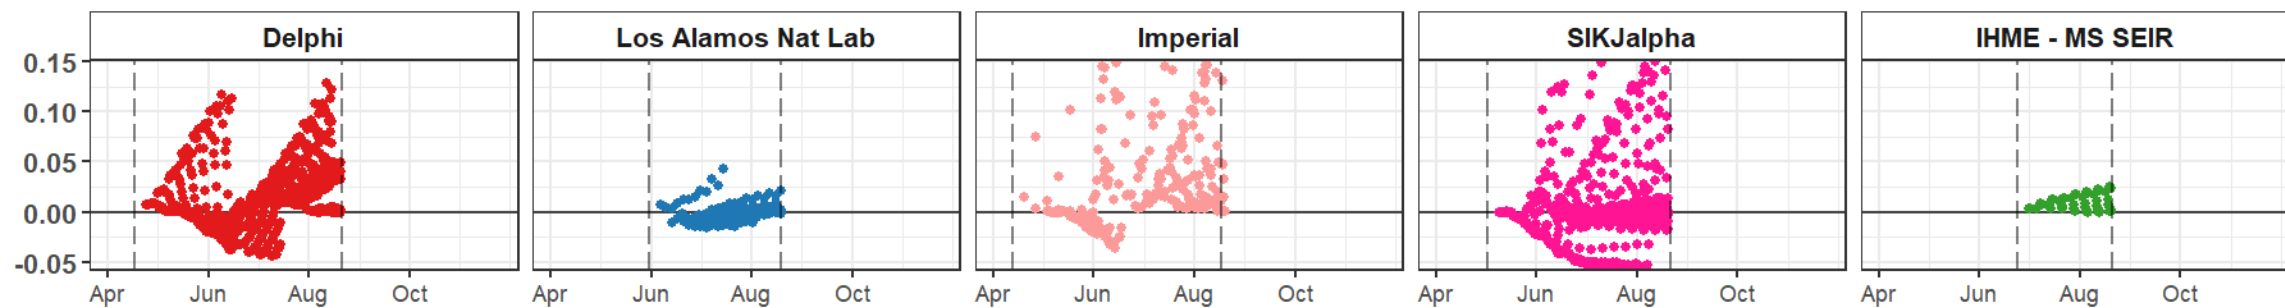

# Thailand

## Current Forecast

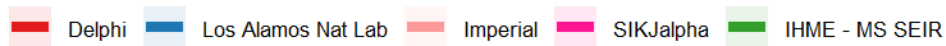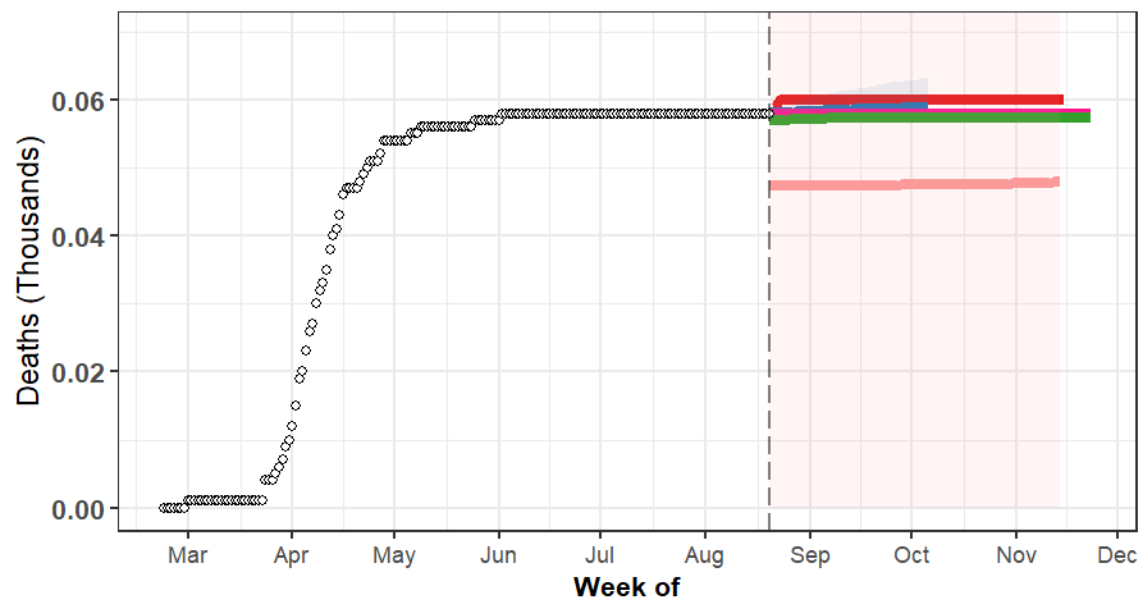

## Cumulative Out-Of-Sample Error (Post Intercept Shift)

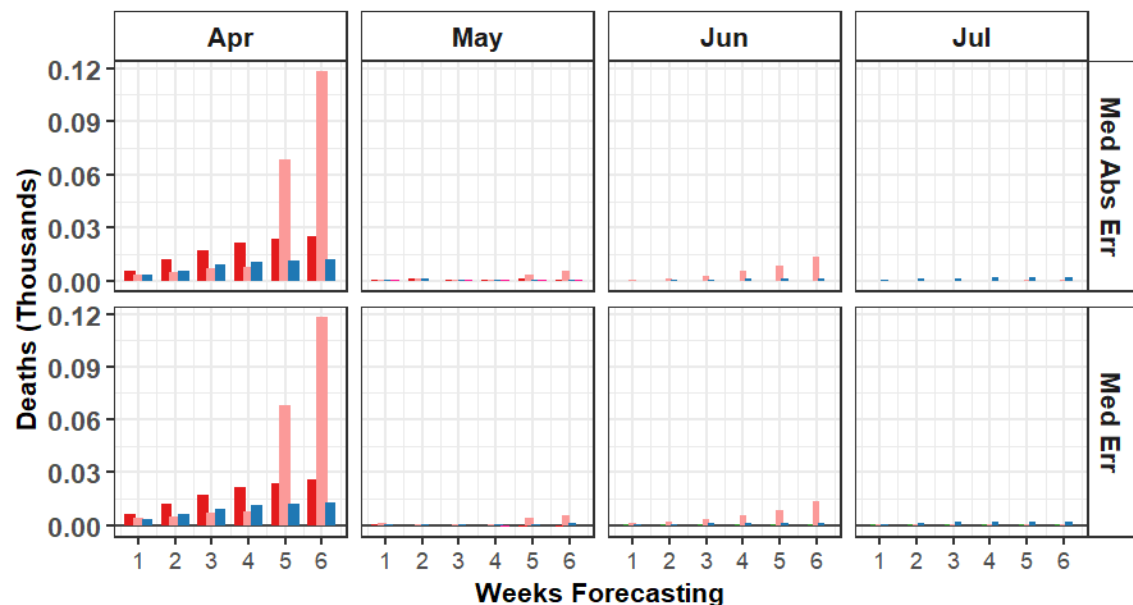

## All Model Versions

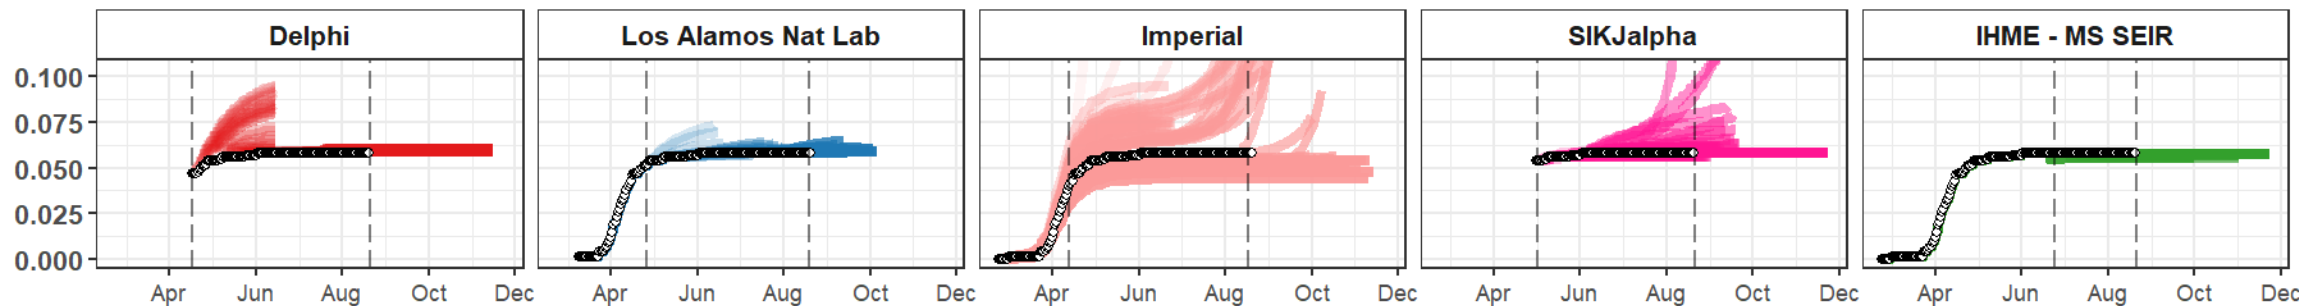

## All Cumulative Errors

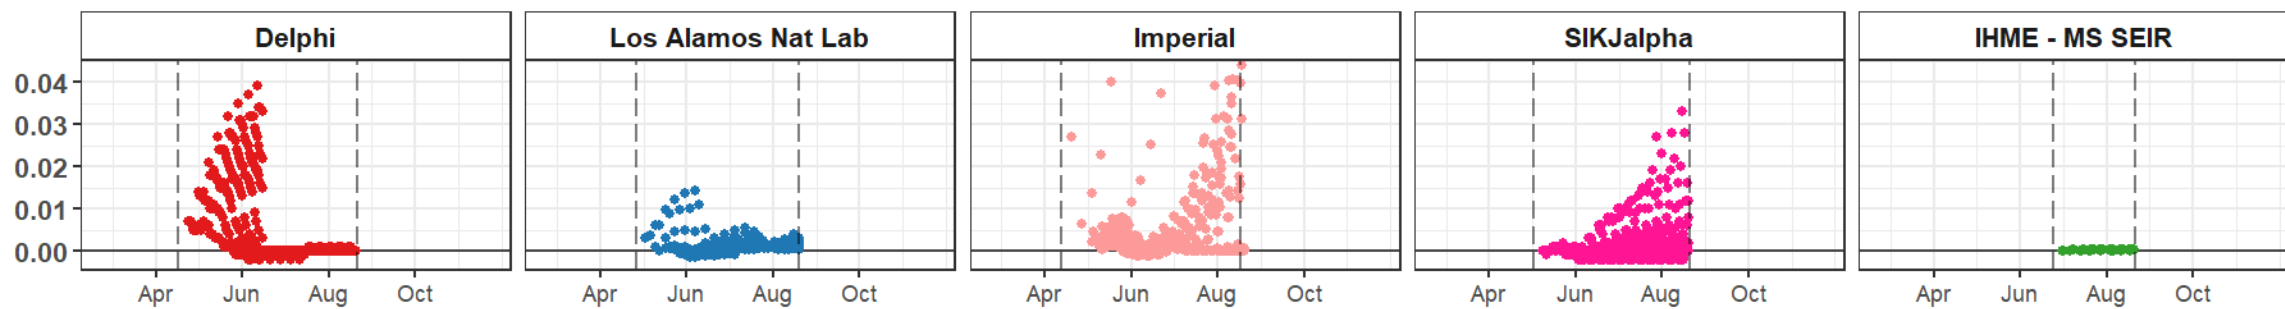

# Vermont

## Current Forecast

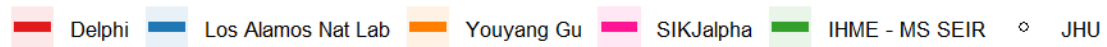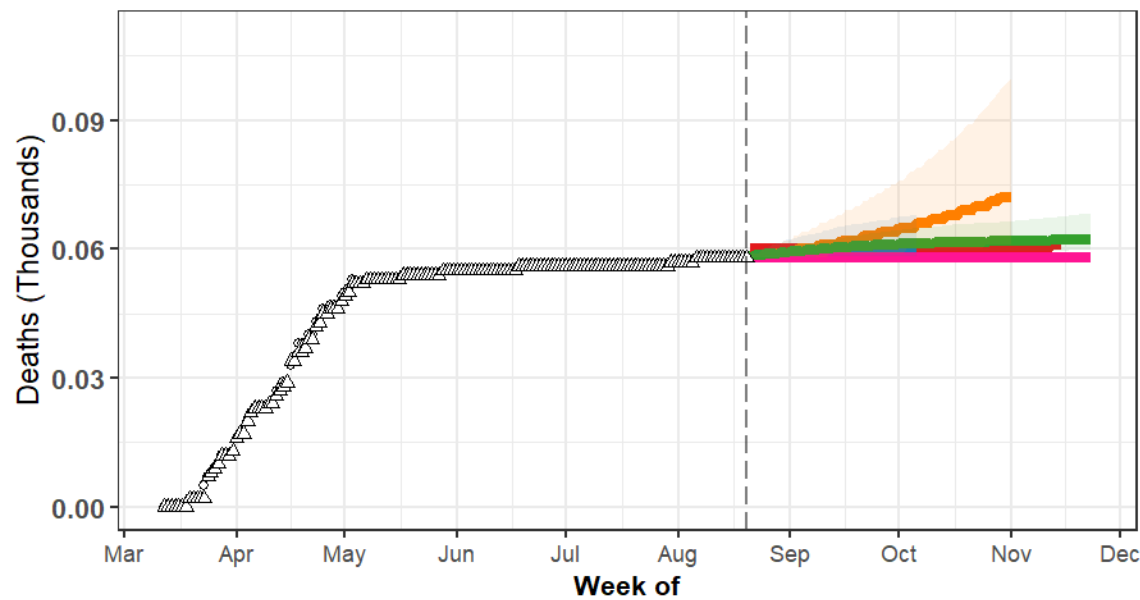

## Cumulative Out-Of-Sample Error (Post Intercept Shift)

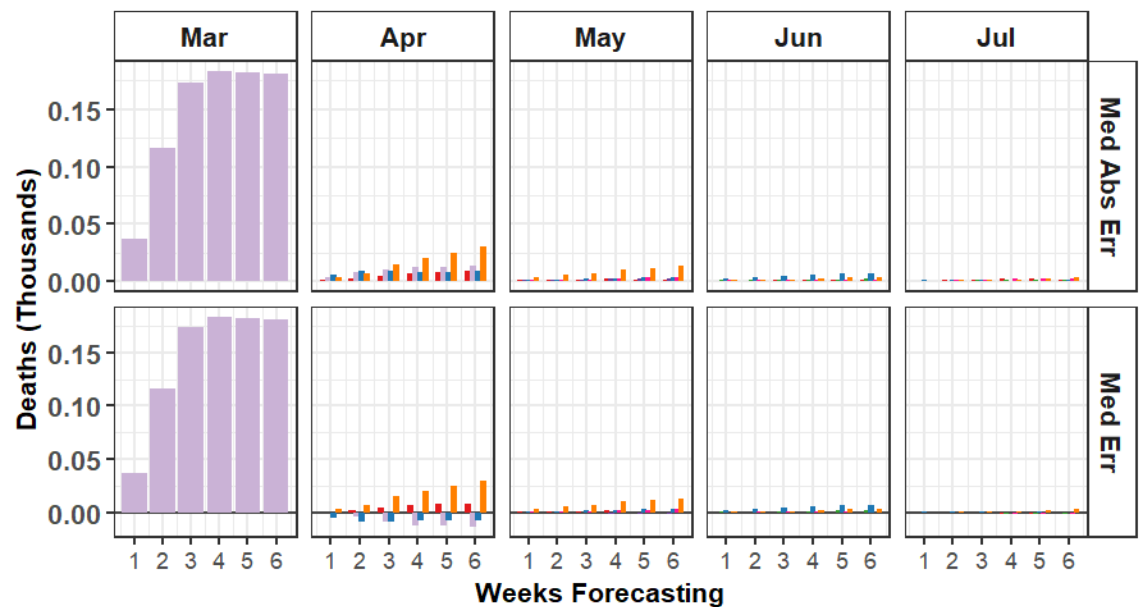

## All Model Versions

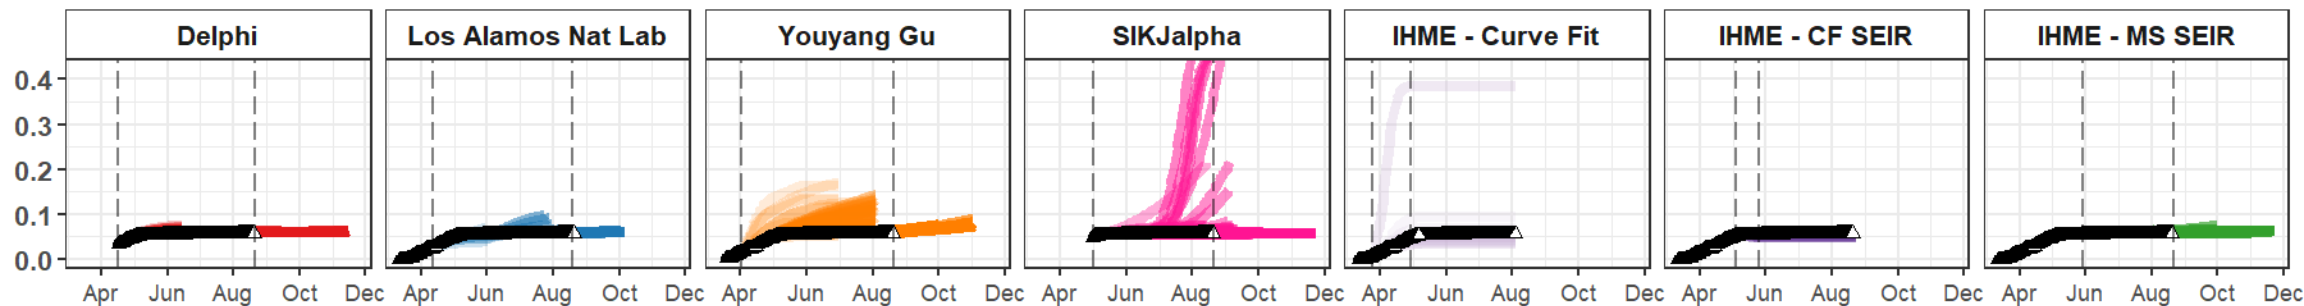

## All Cumulative Errors

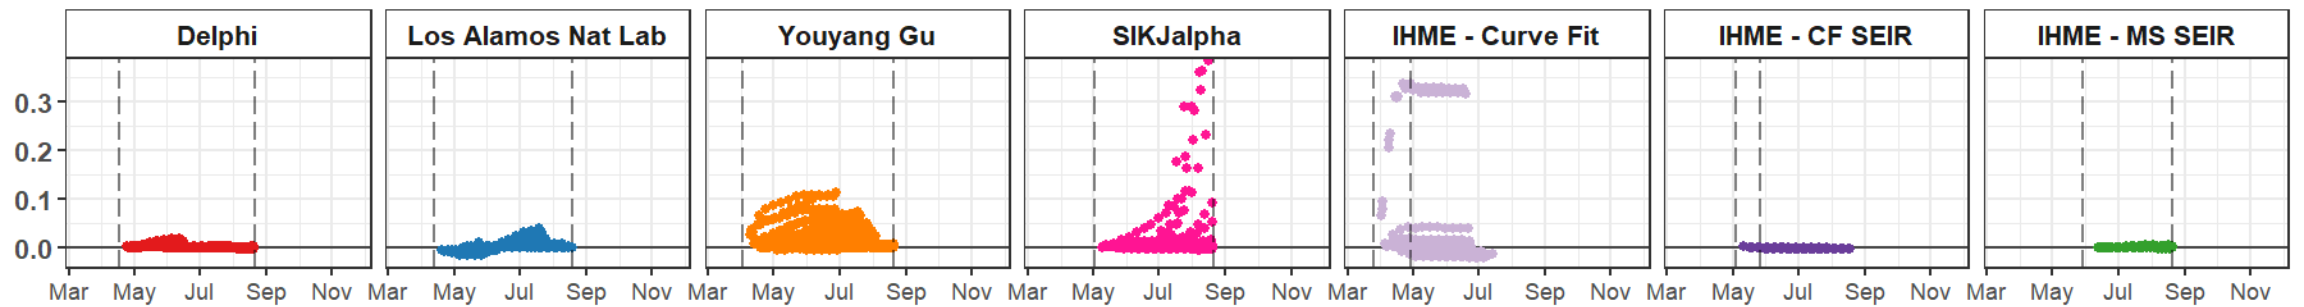

# Burkina Faso

## Current Forecast

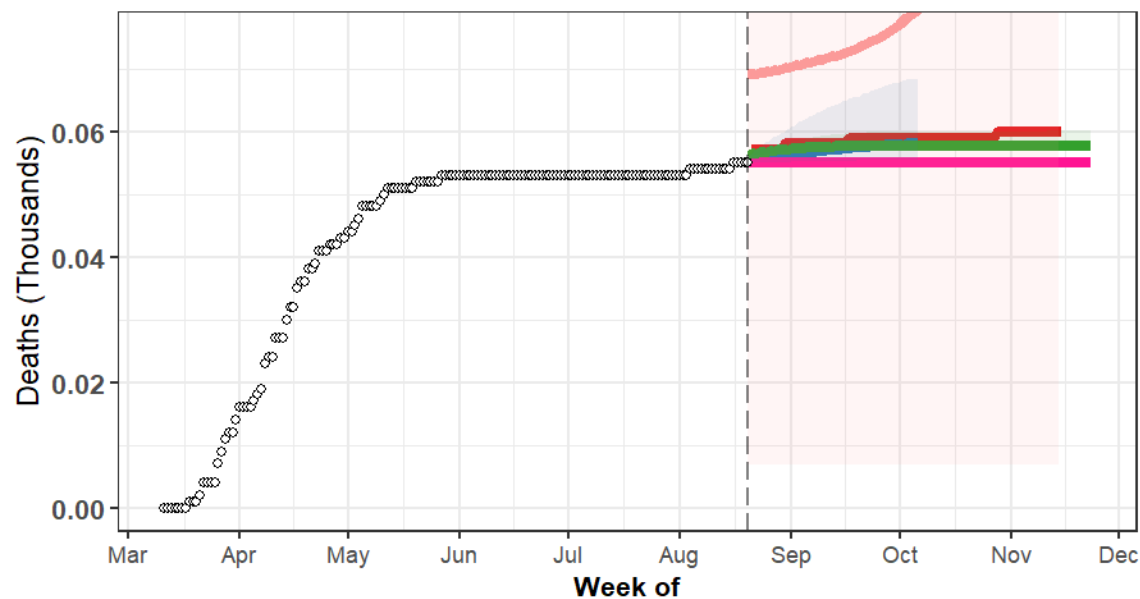

## Cumulative Out-Of-Sample Error (Post Intercept Shift)

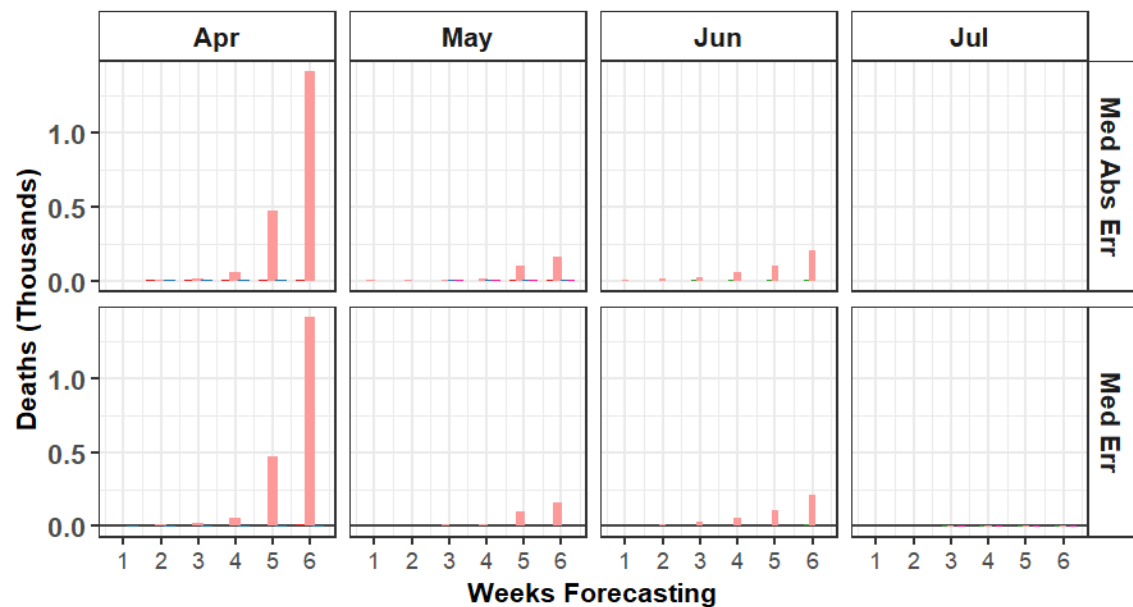

## All Model Versions

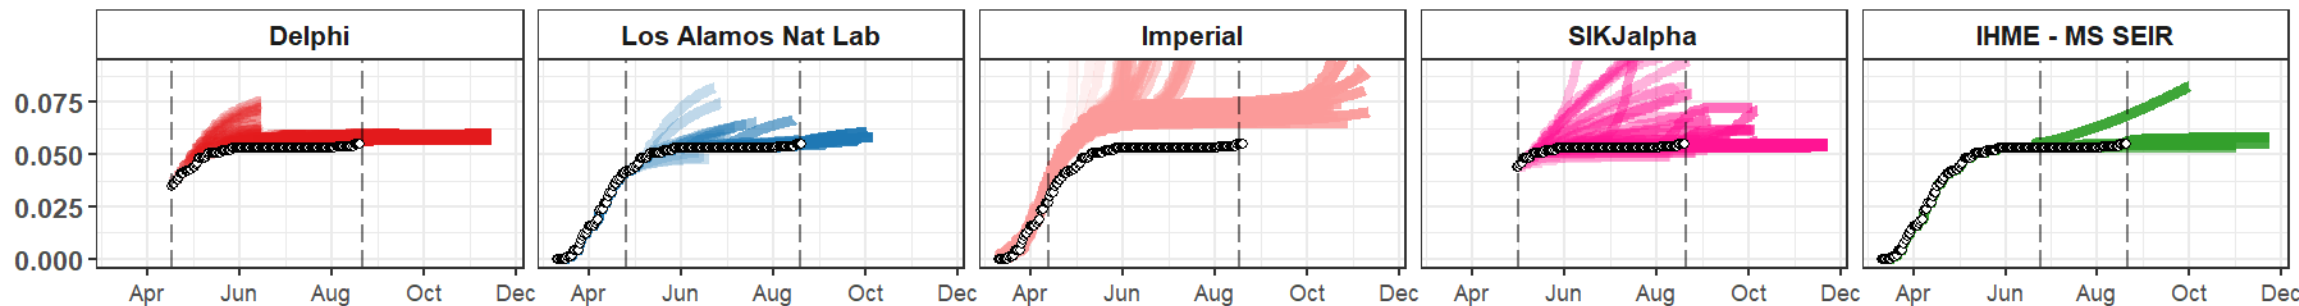

## All Cumulative Errors

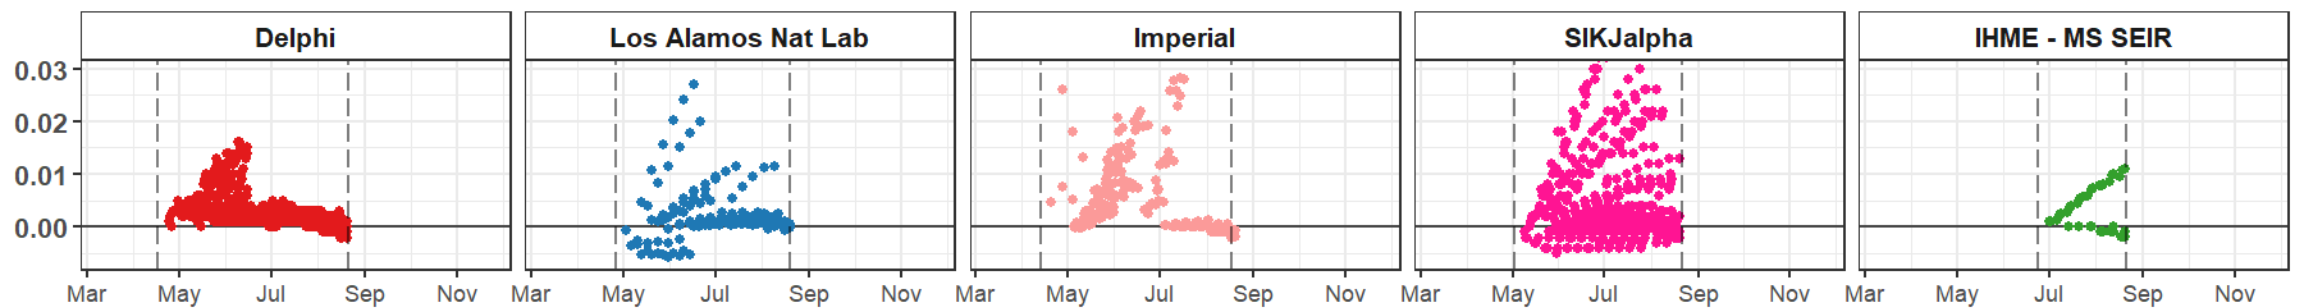



# Suriname

## Current Forecast

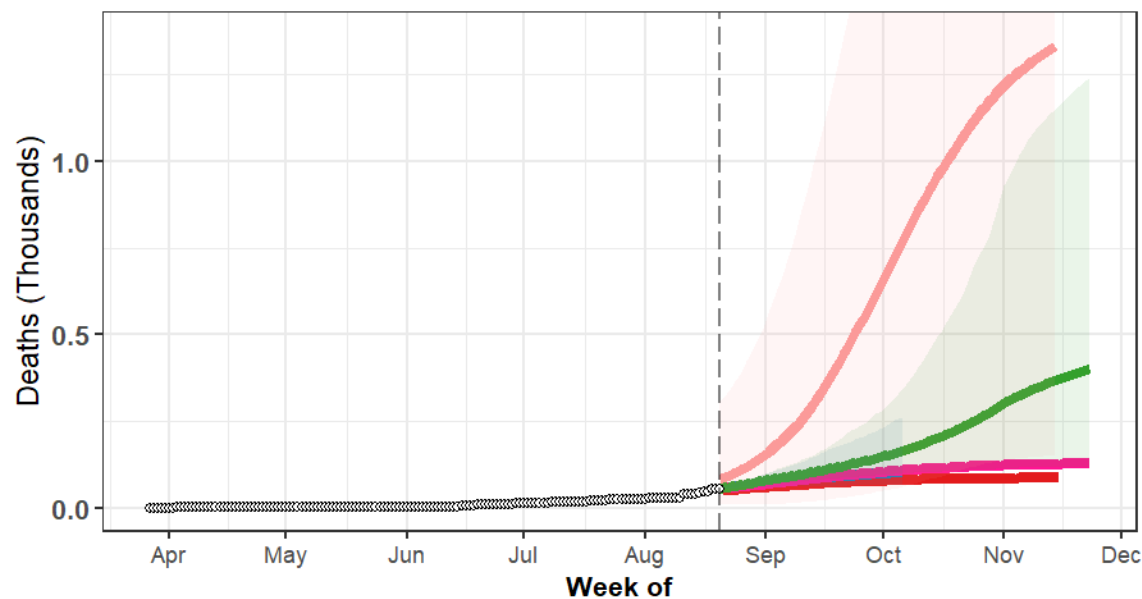

## Cumulative Out-Of-Sample Error (Post Intercept Shift)

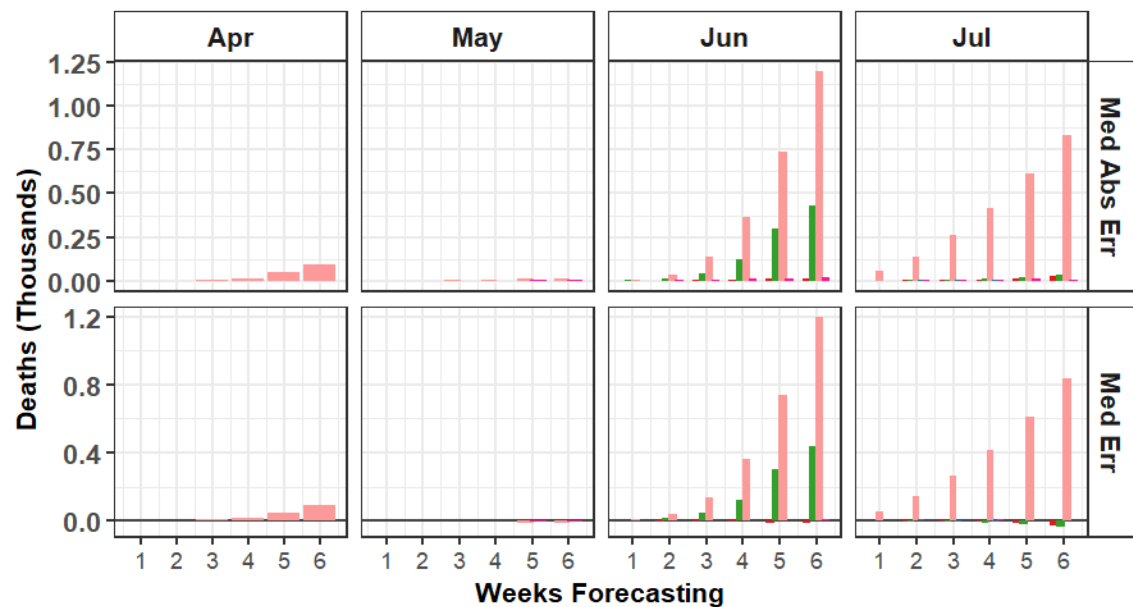

## All Model Versions

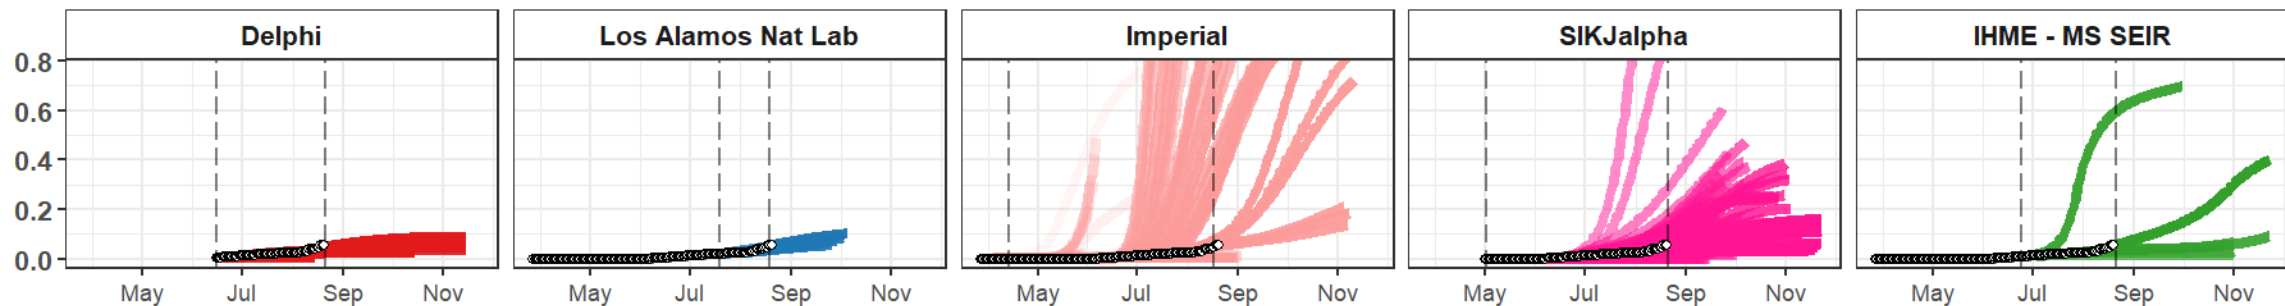

## All Cumulative Errors

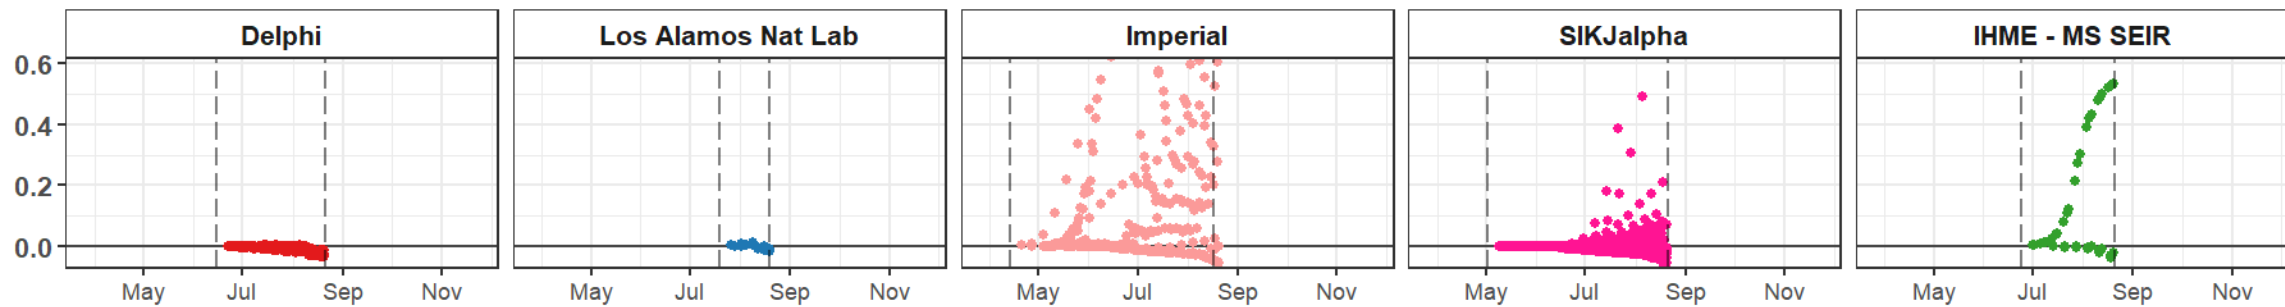

# Andorra

## Current Forecast

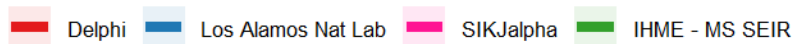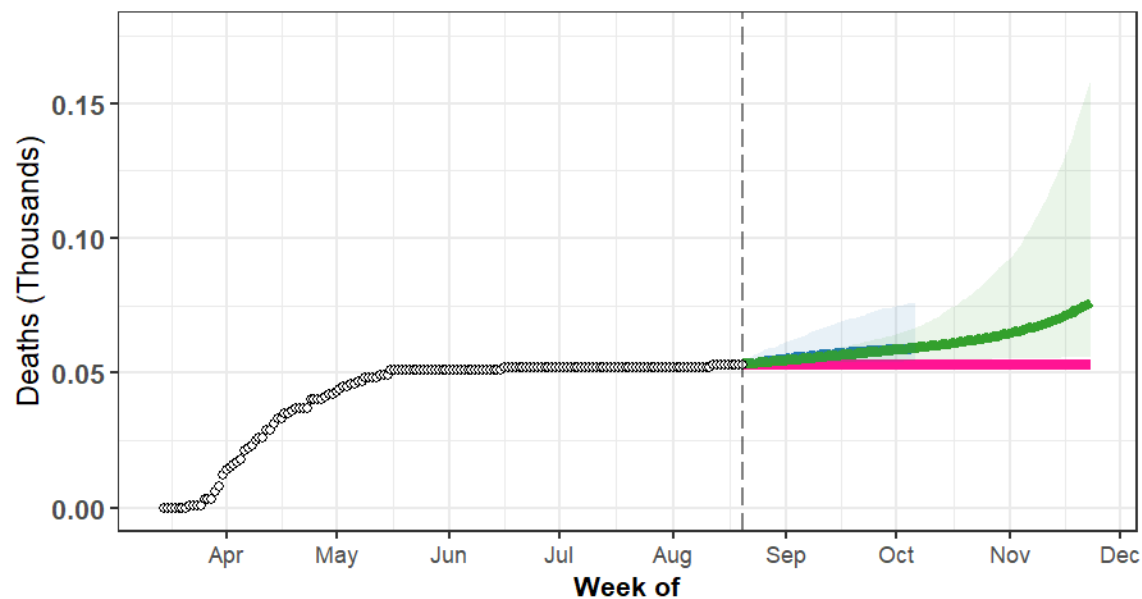

## Cumulative Out-Of-Sample Error (Post Intercept Shift)

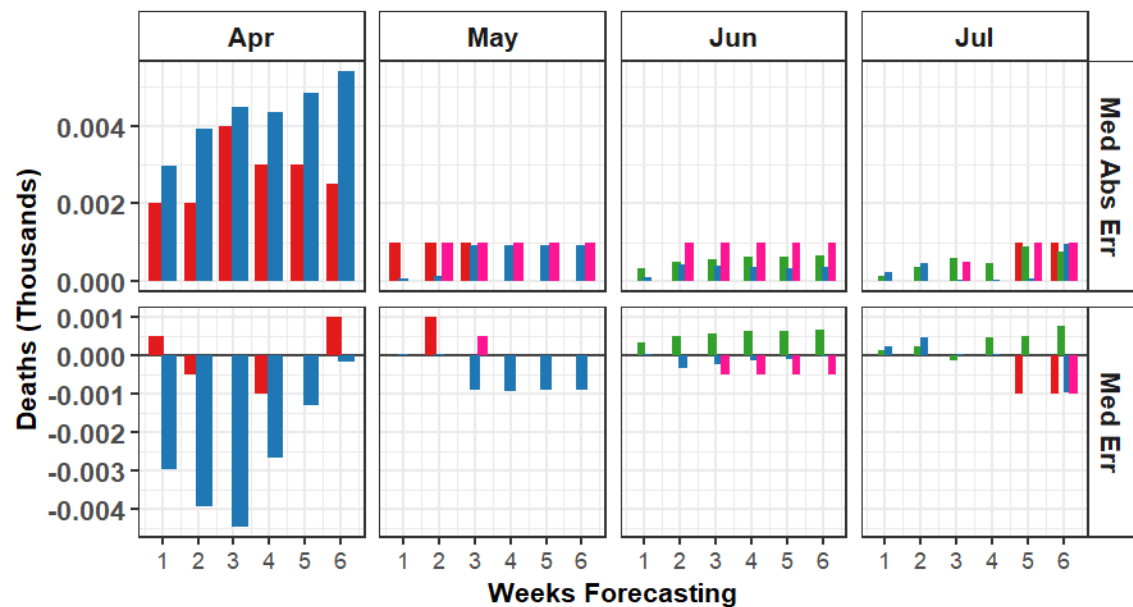

## All Model Versions

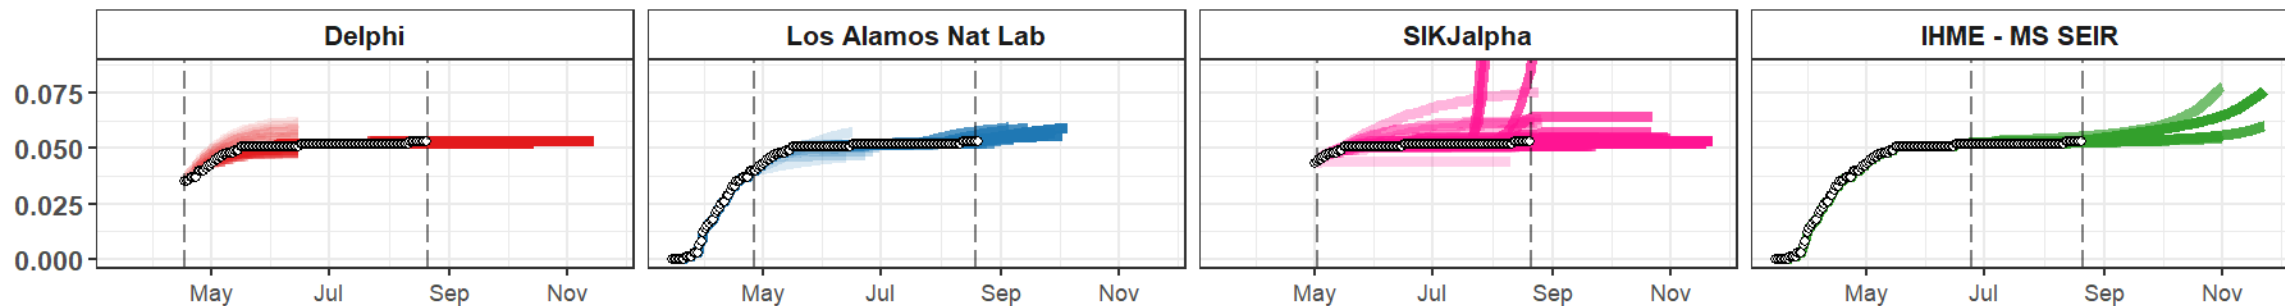

## All Cumulative Errors

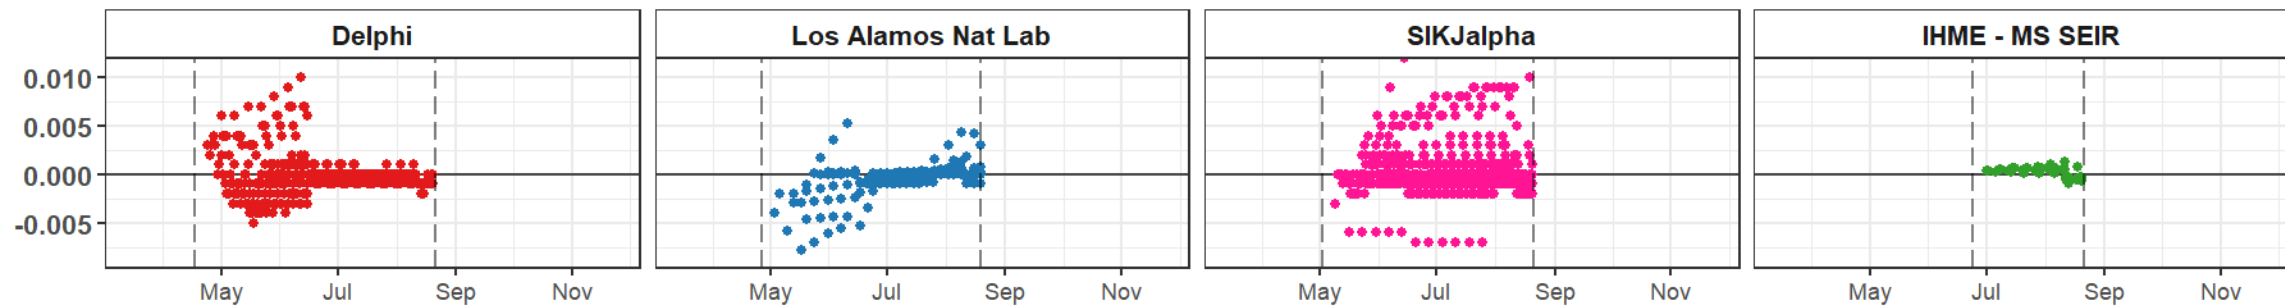

# Gabon

## Current Forecast

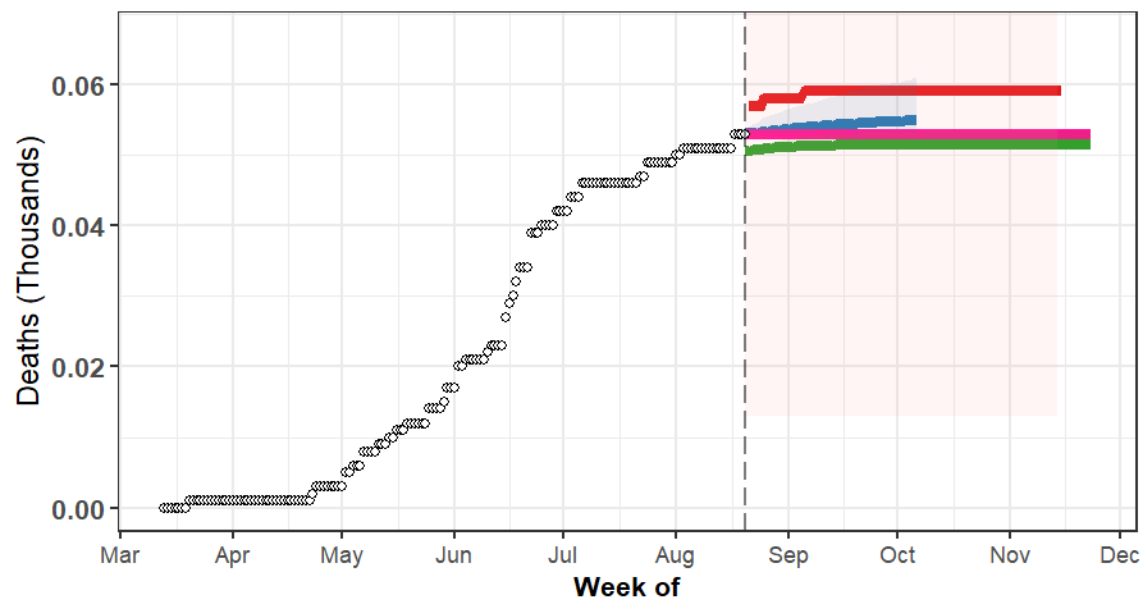

## Cumulative Out-Of-Sample Error (Post Intercept Shift)

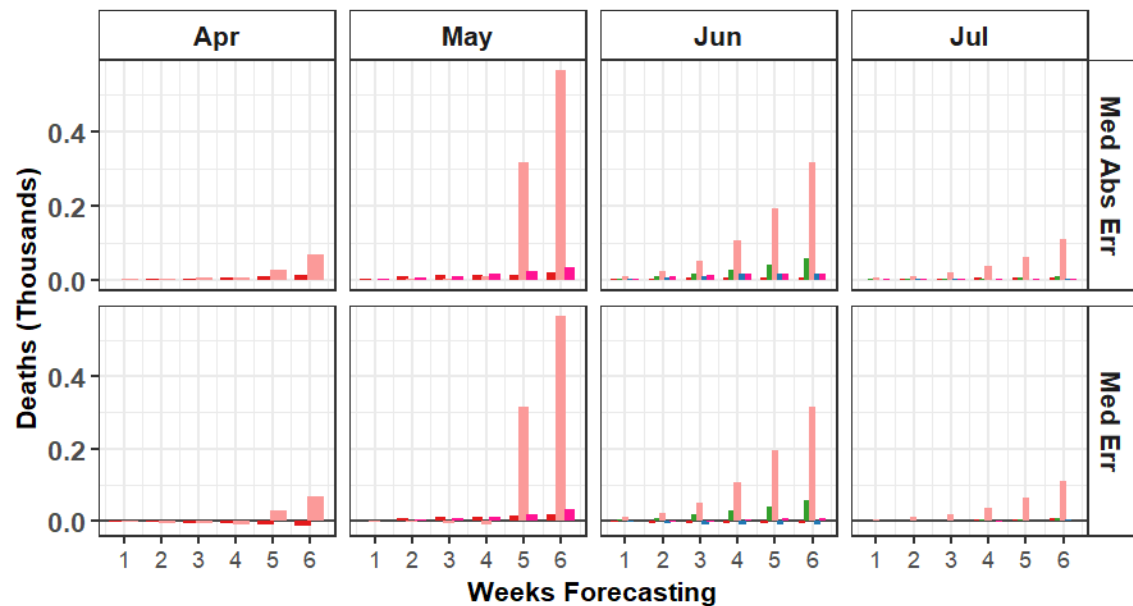

## All Model Versions

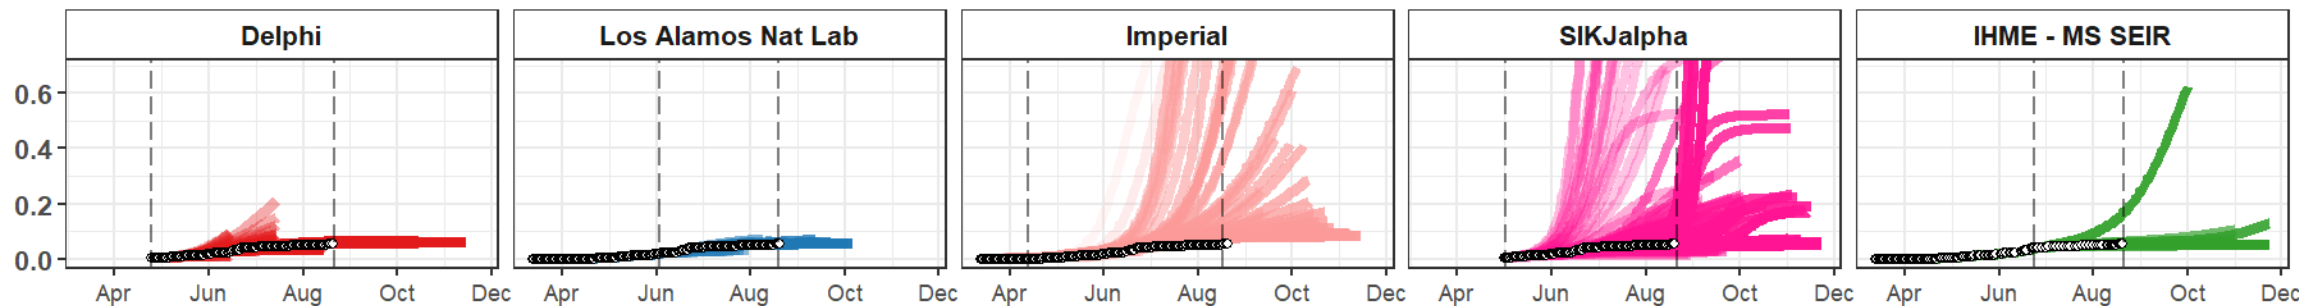

## All Cumulative Errors

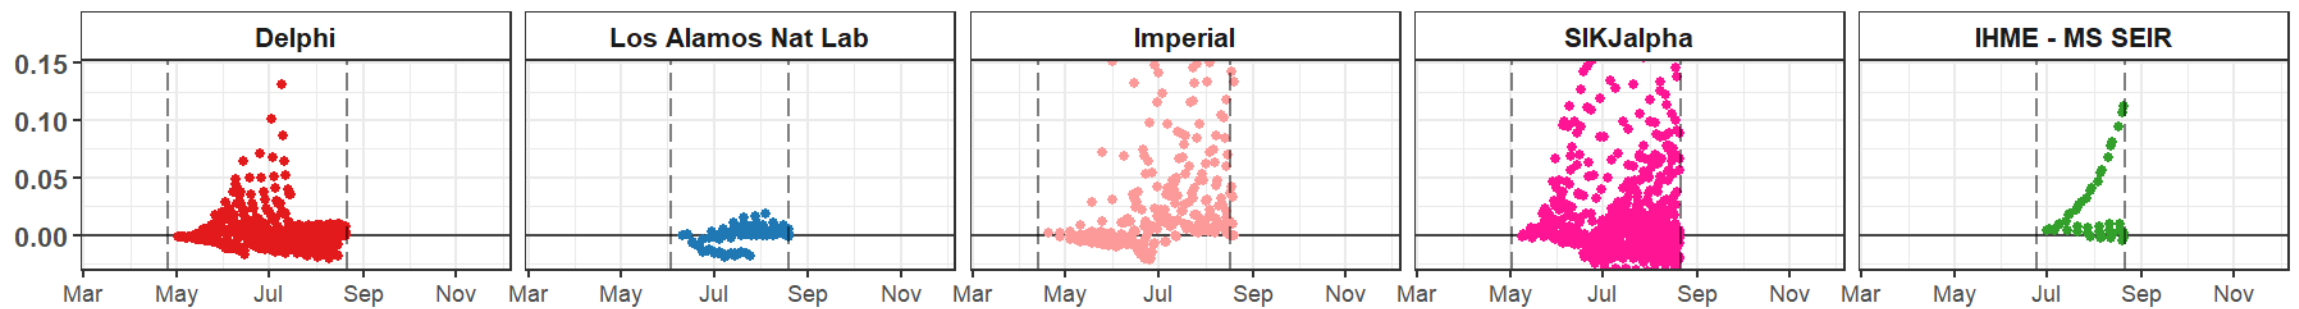

# Guinea

## Current Forecast

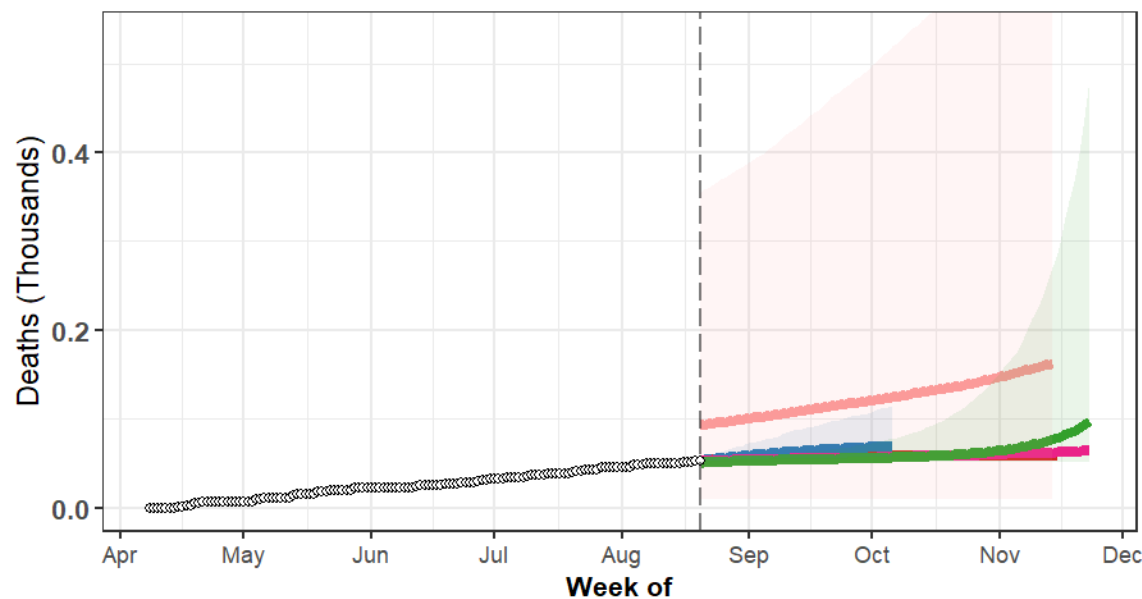

## Cumulative Out-Of-Sample Error (Post Intercept Shift)

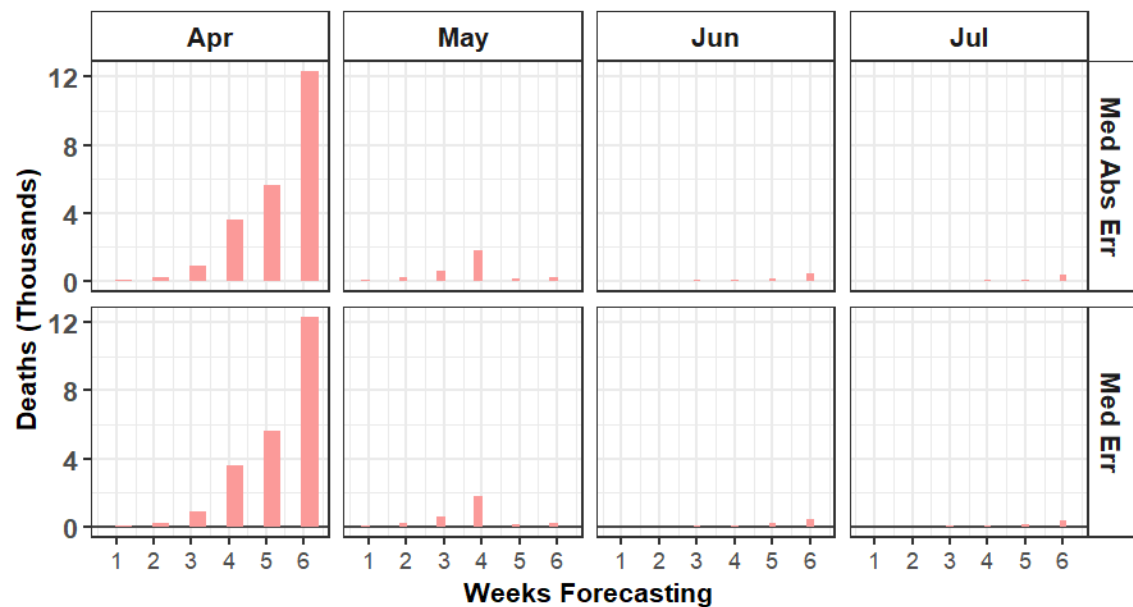

## All Model Versions

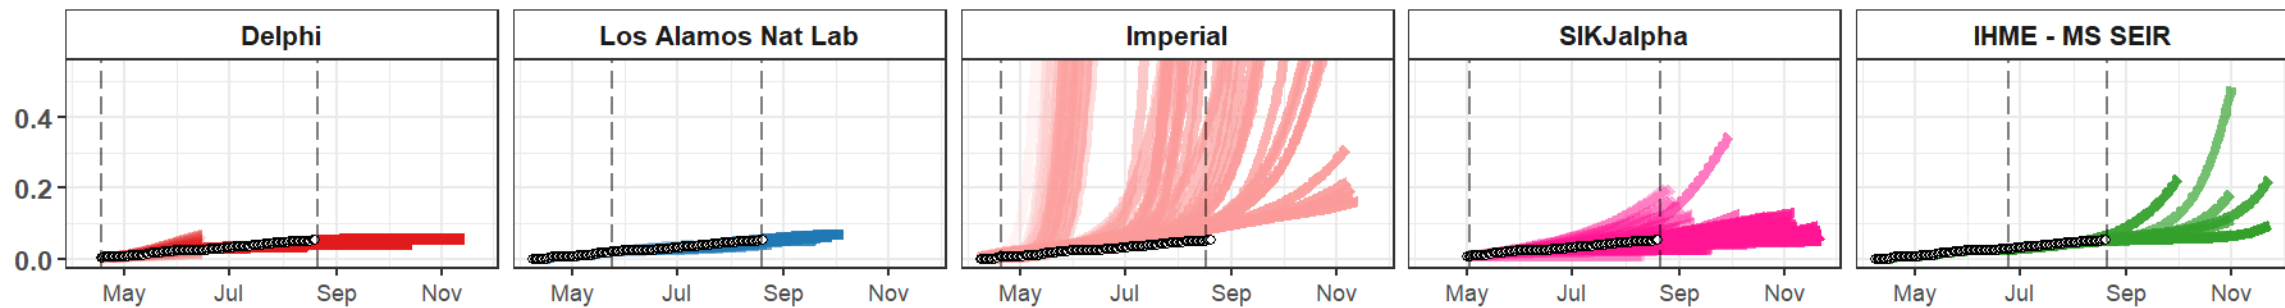

## All Cumulative Errors

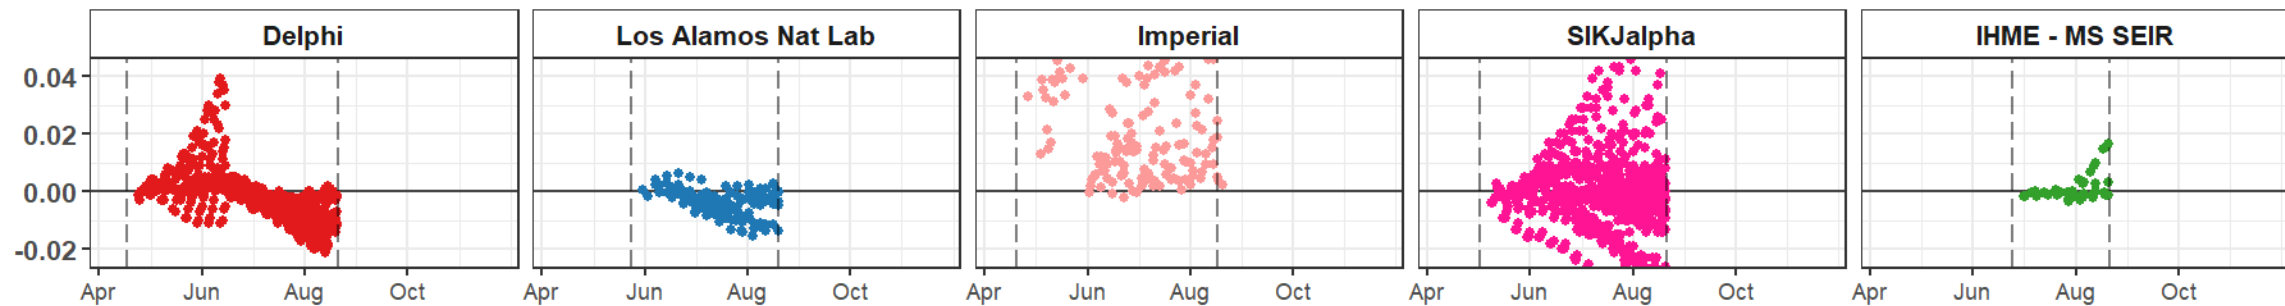

# South Sudan

## Current Forecast

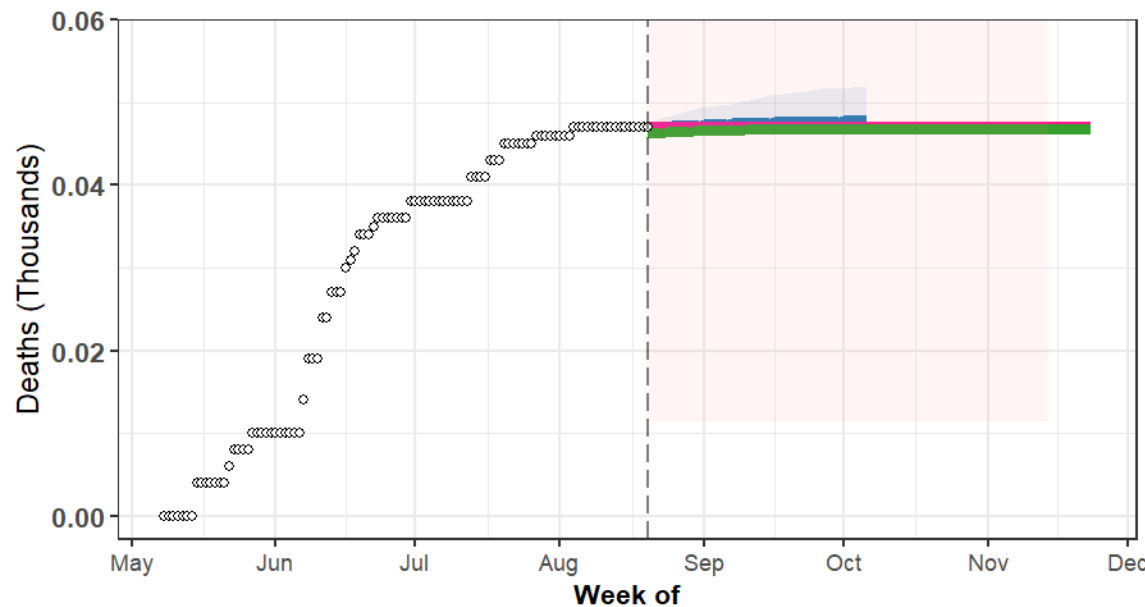

## Cumulative Out-Of-Sample Error (Post Intercept Shift)

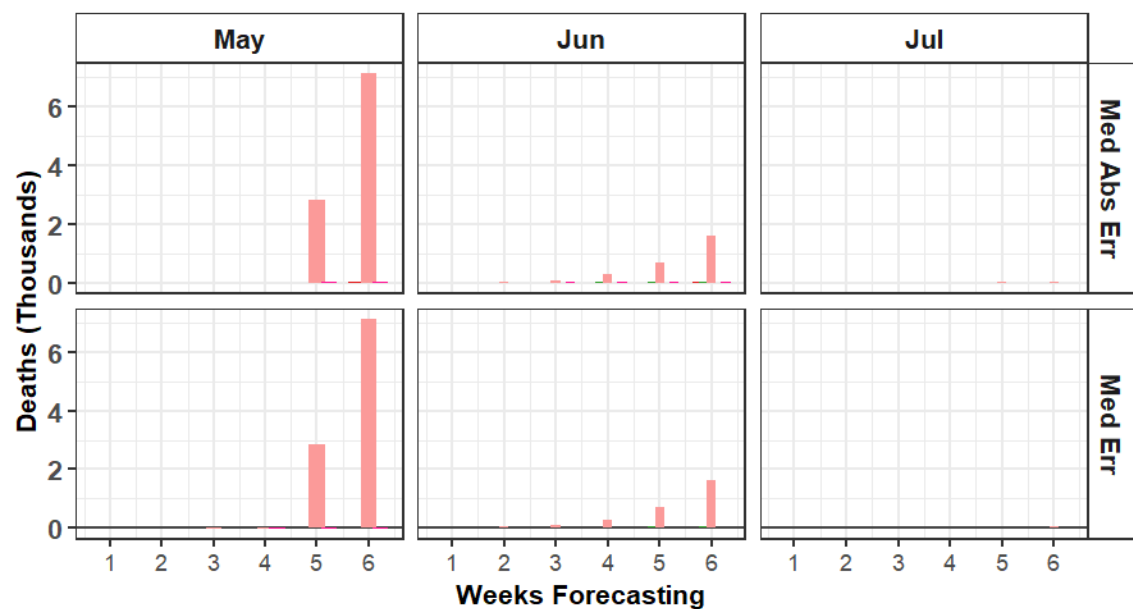

## All Model Versions

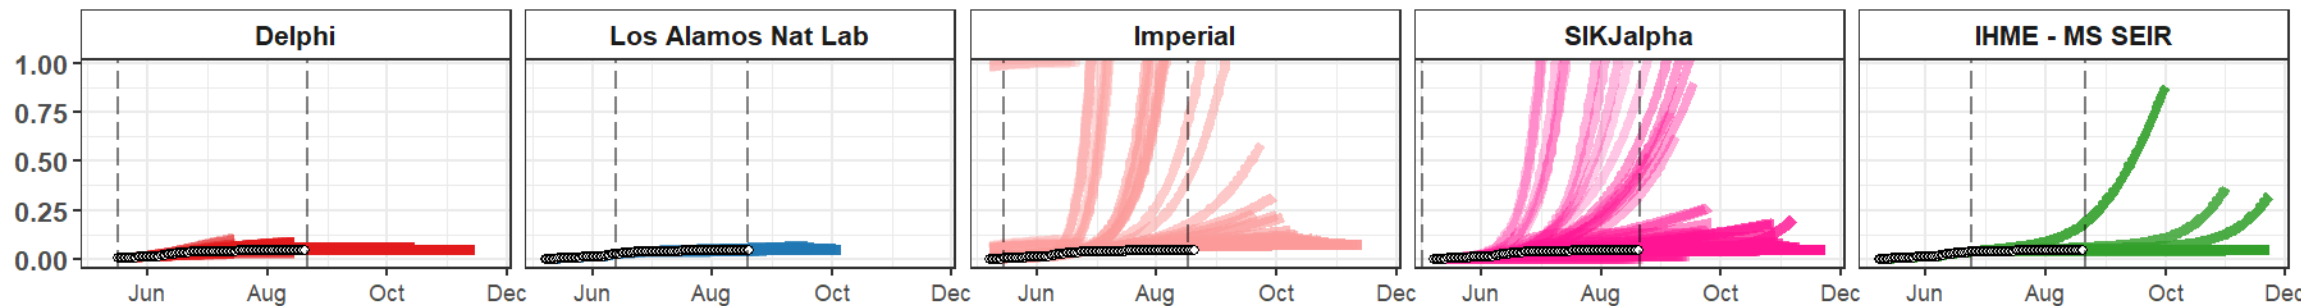

## All Cumulative Errors

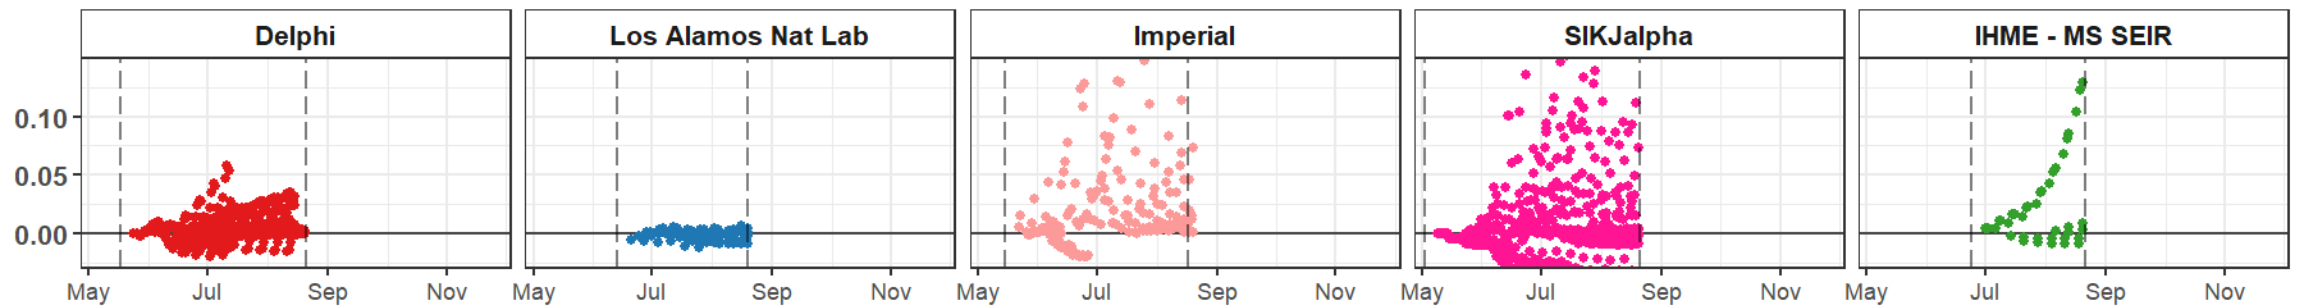

# Hawaii

## Current Forecast

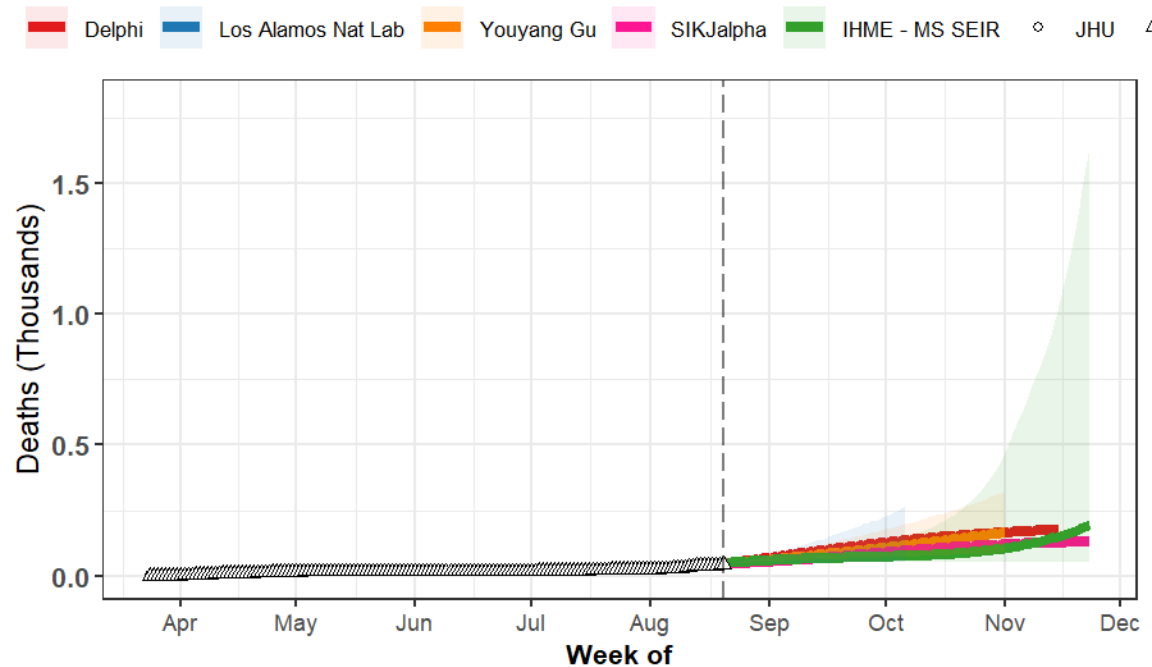

## Cumulative Out-Of-Sample Error (Post Intercept Shift)

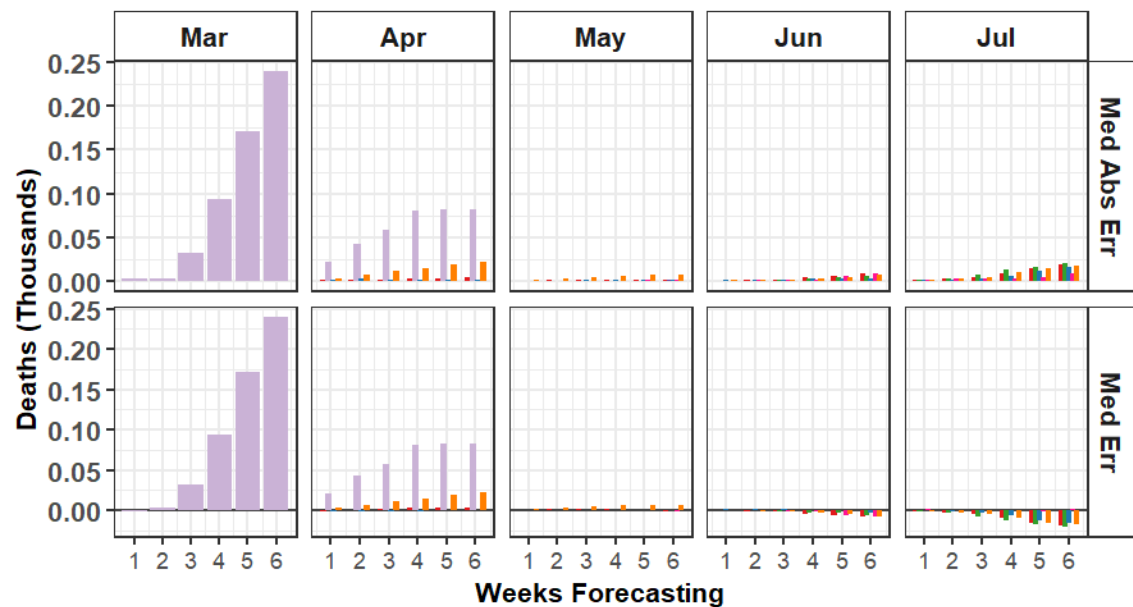

## All Model Versions

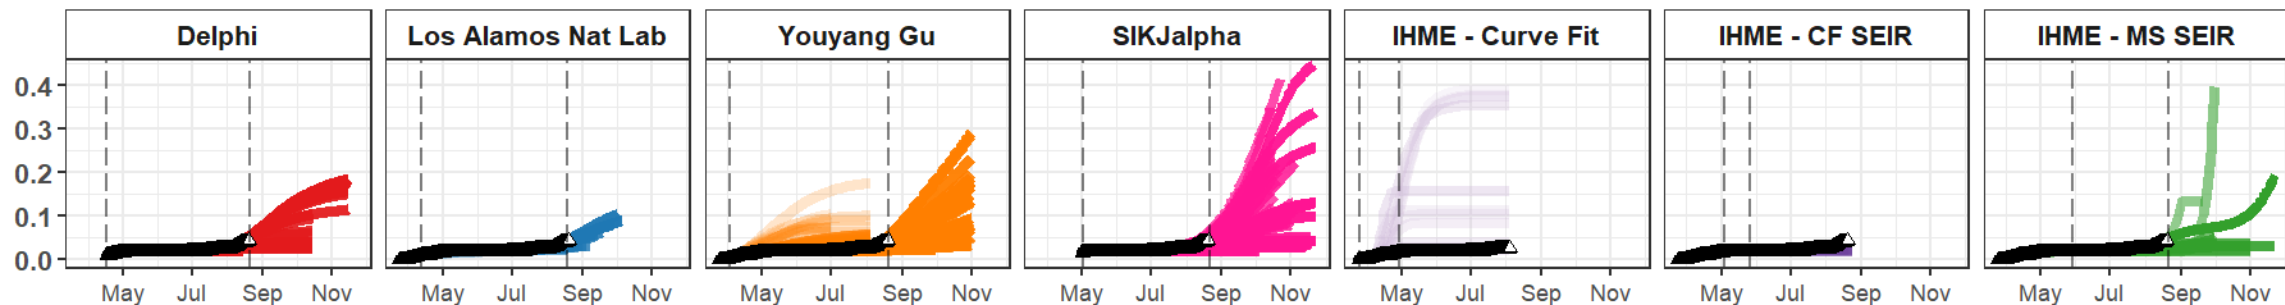

## All Cumulative Errors

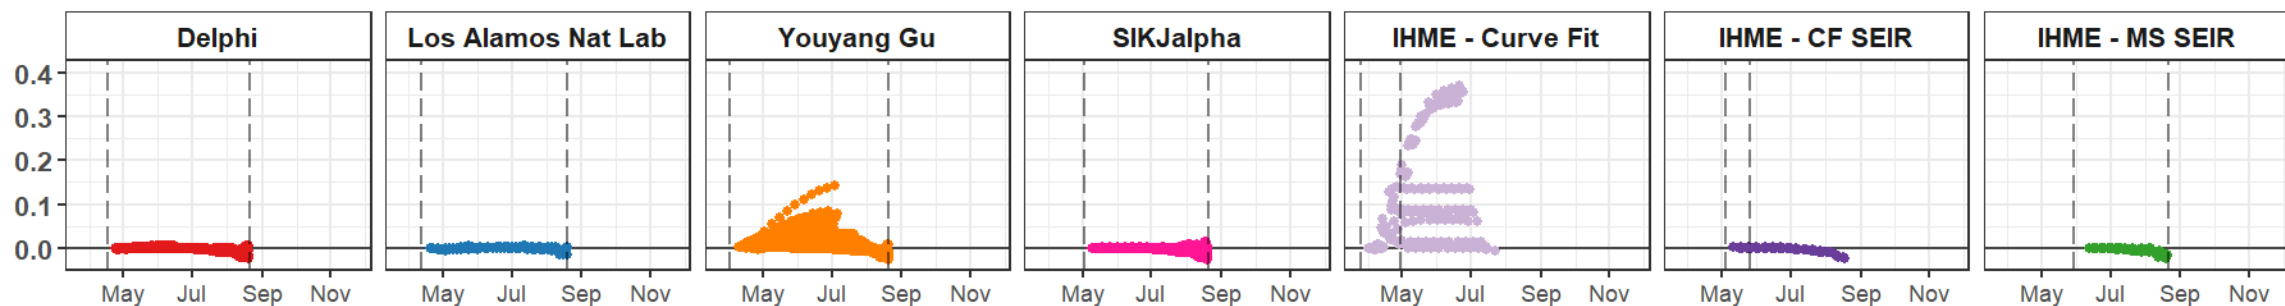

# Namibia

## Current Forecast

Delphi Los Alamos Nat Lab Imperial SIKJalpha

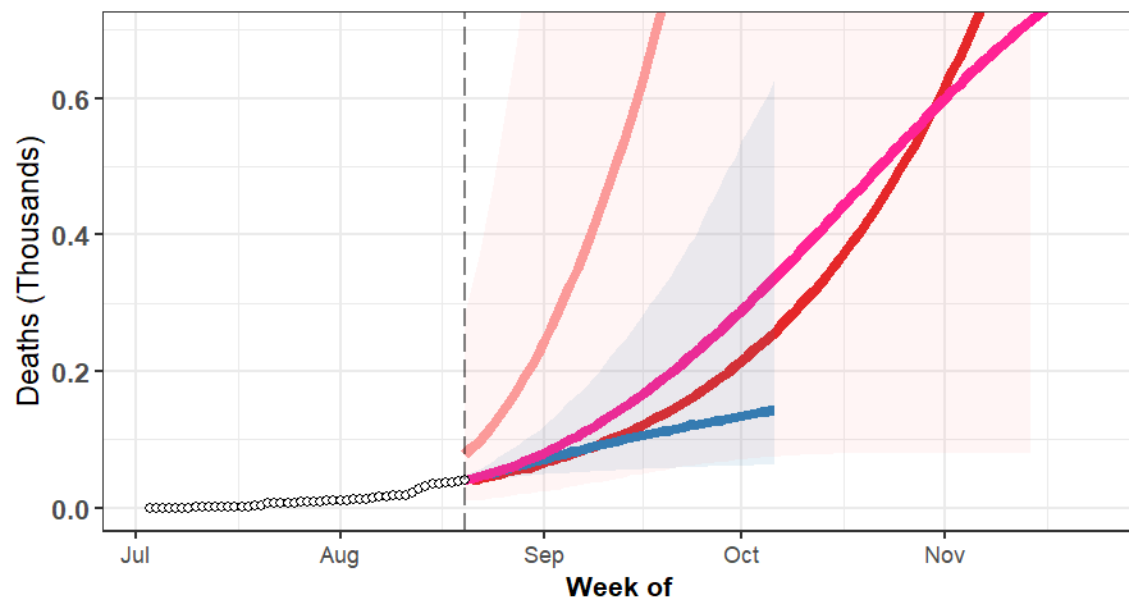

## Cumulative Out-Of-Sample Error (Post Intercept Shift)

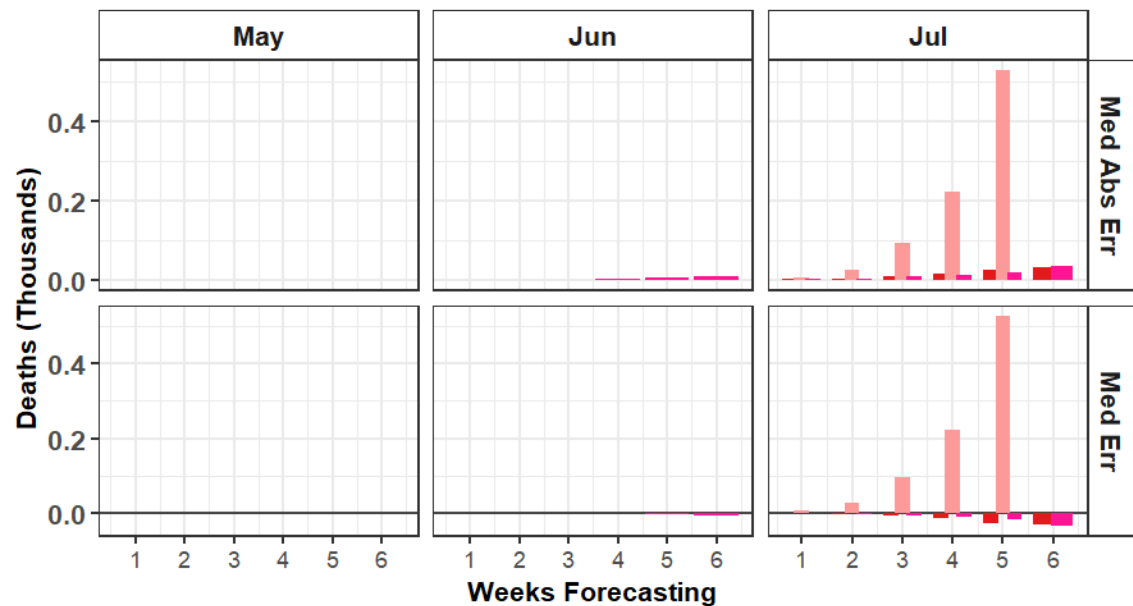

## All Model Versions

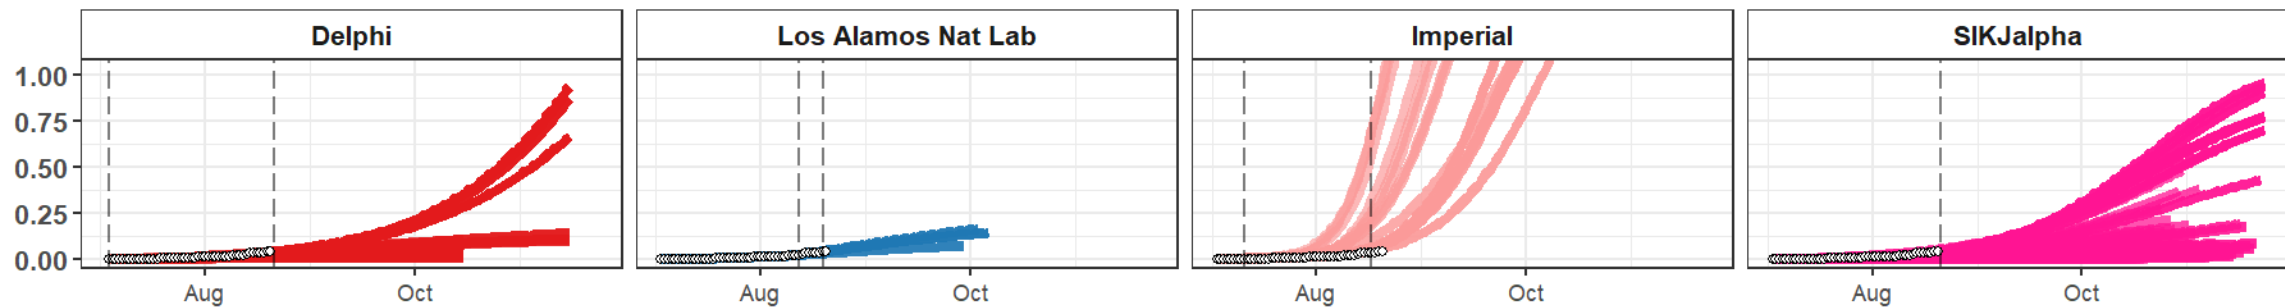

## All Cumulative Errors

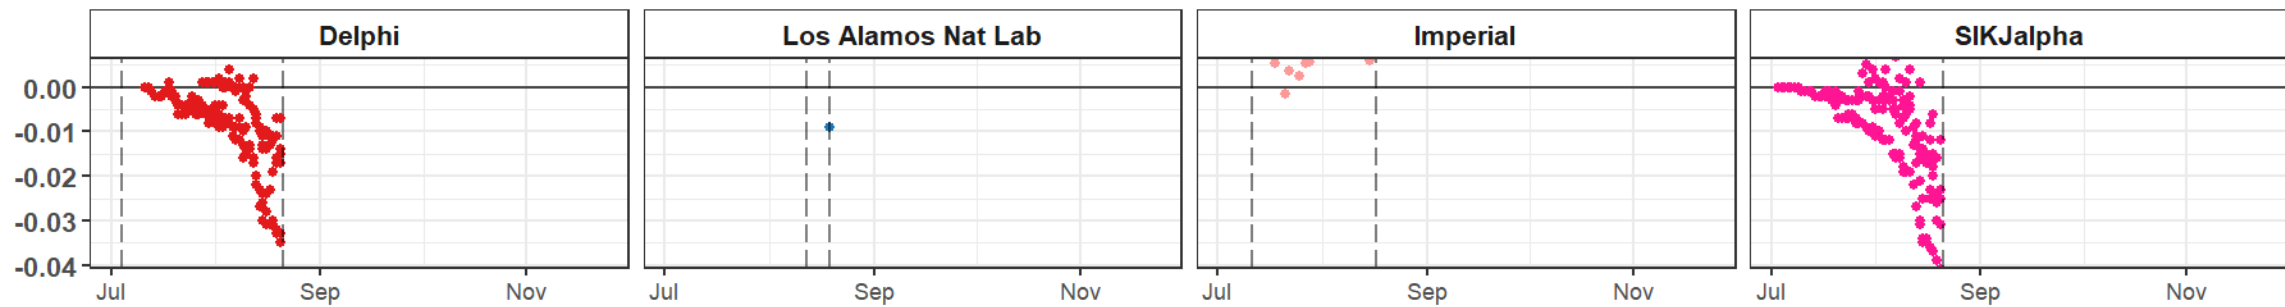

# Uruguay

## Current Forecast

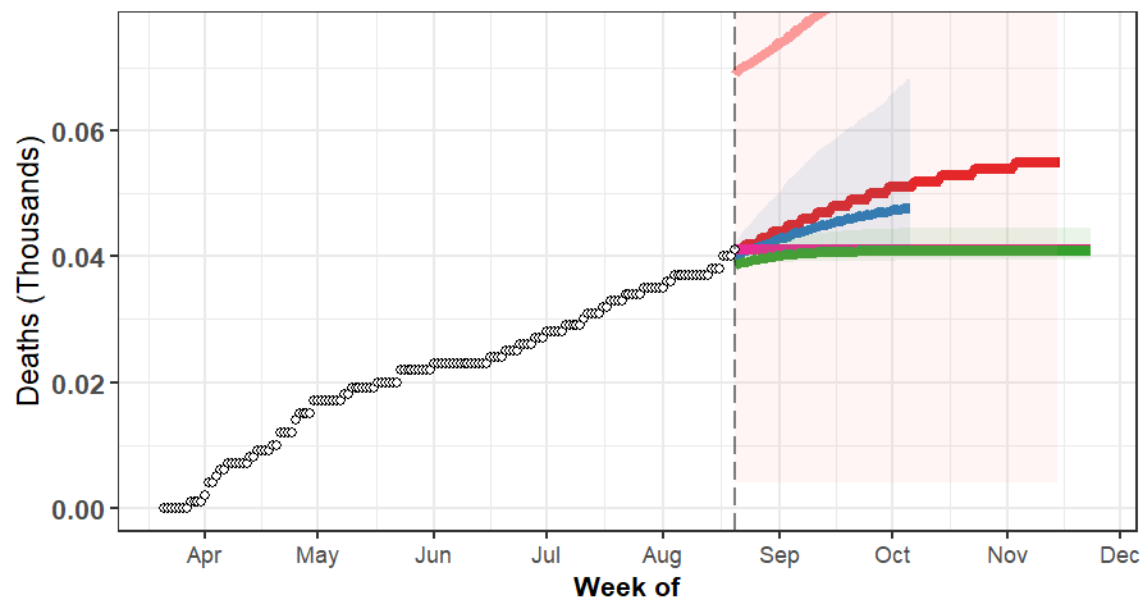

## Cumulative Out-Of-Sample Error (Post Intercept Shift)

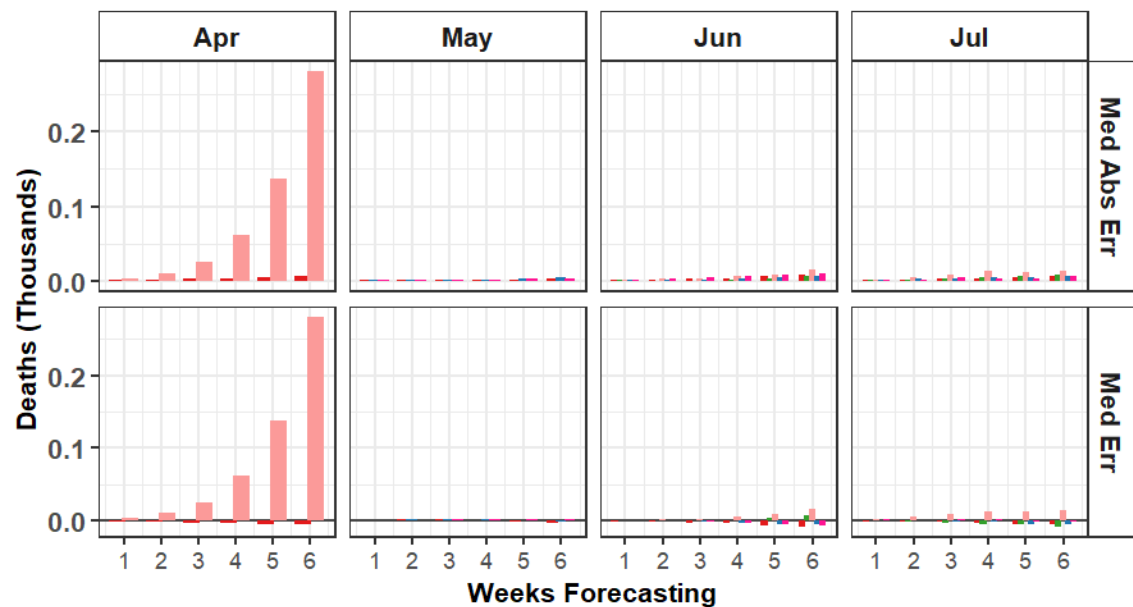

## All Model Versions

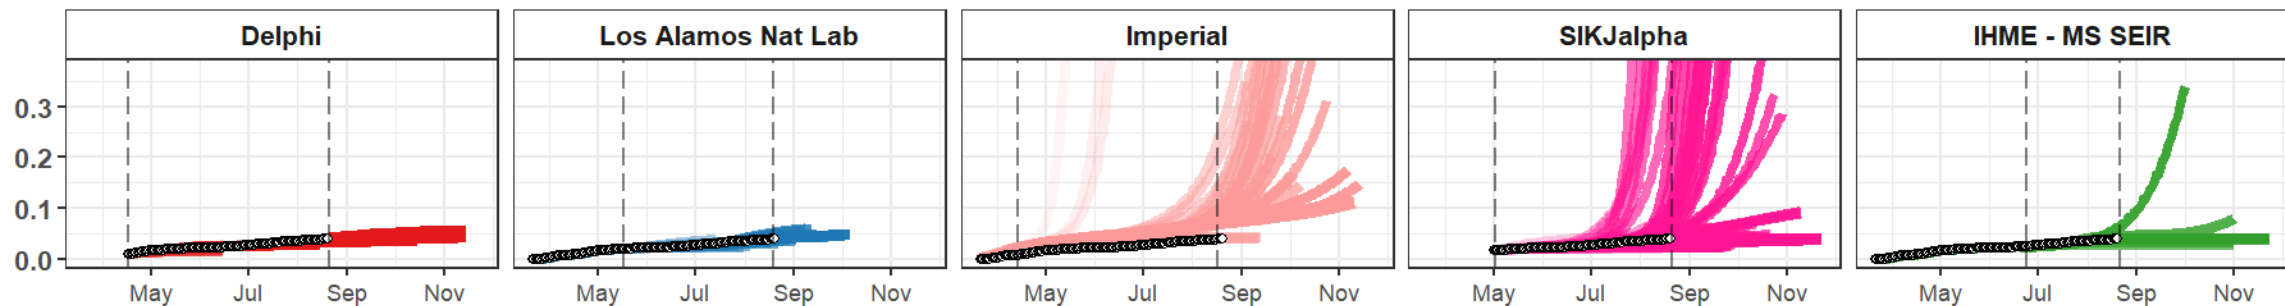

## All Cumulative Errors

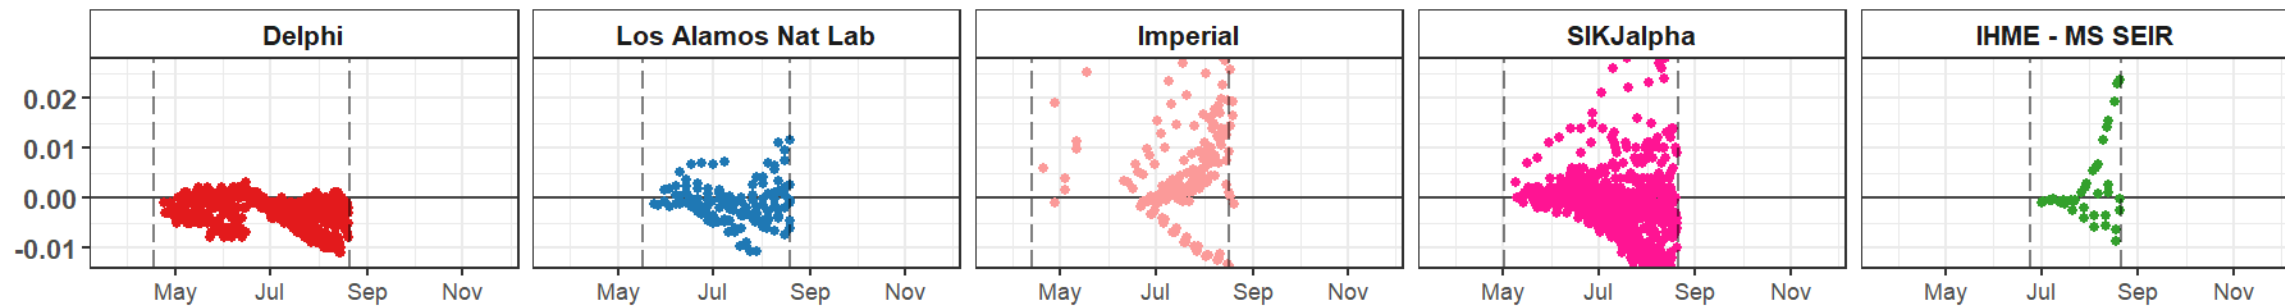



# Benin

## Current Forecast

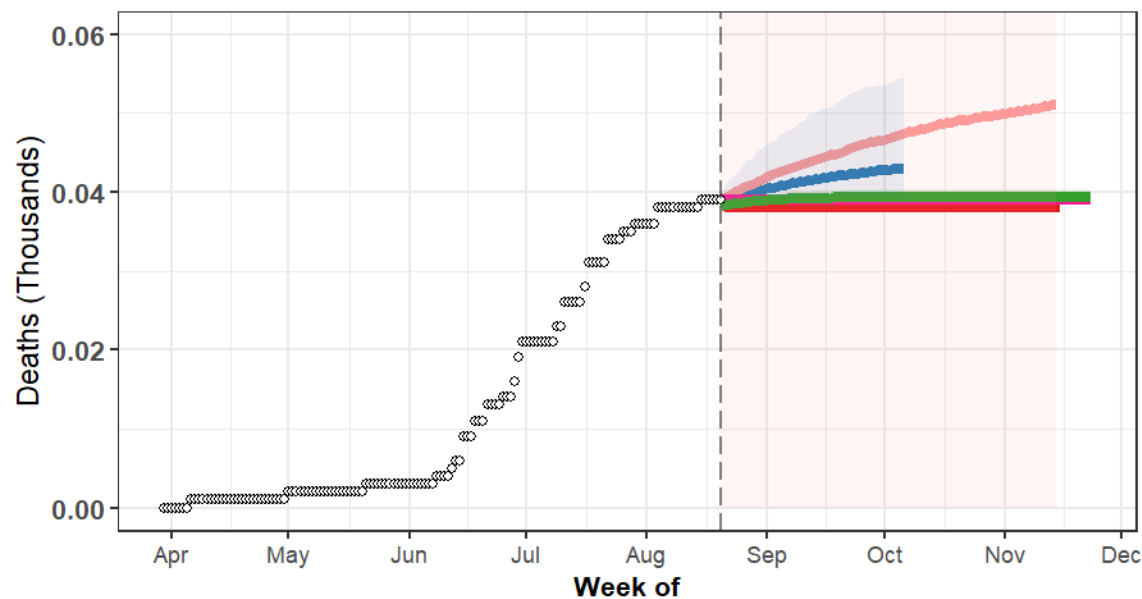

## Cumulative Out-Of-Sample Error (Post Intercept Shift)

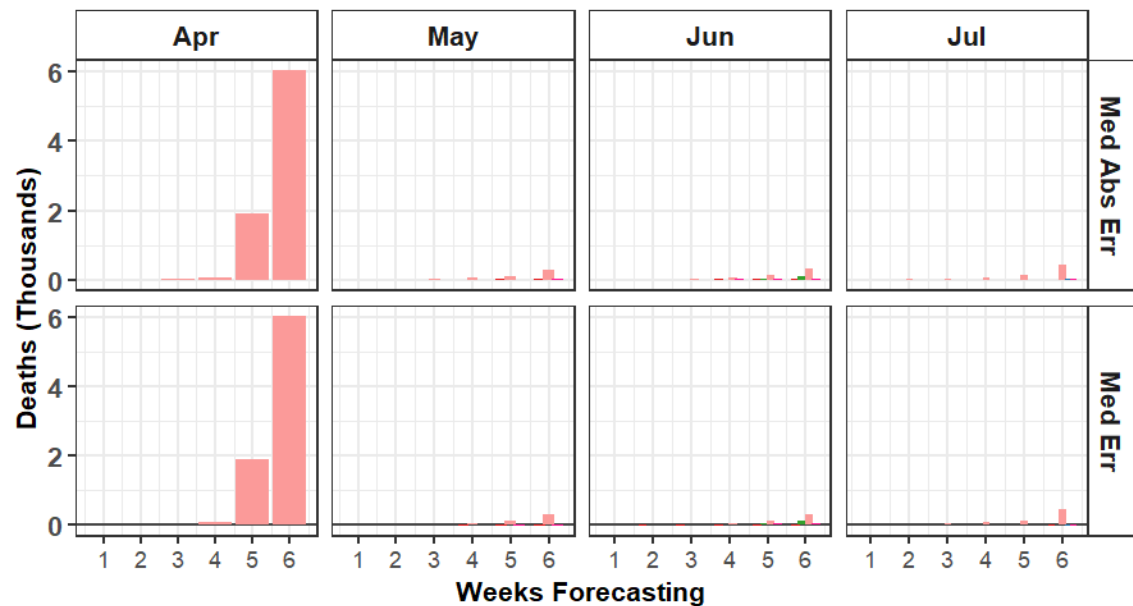

## All Model Versions

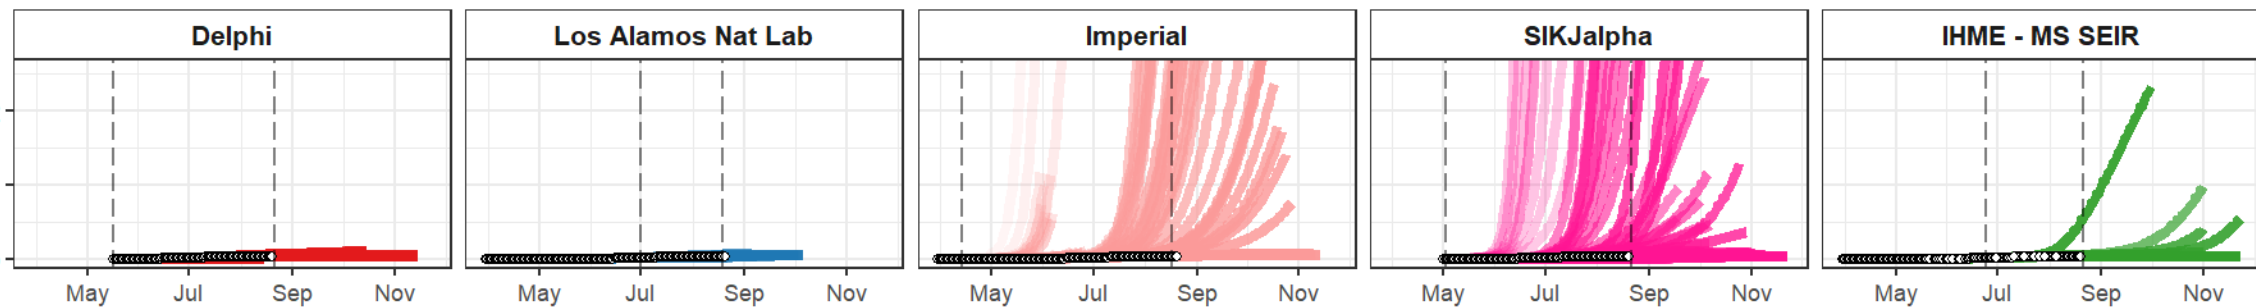

## All Cumulative Errors

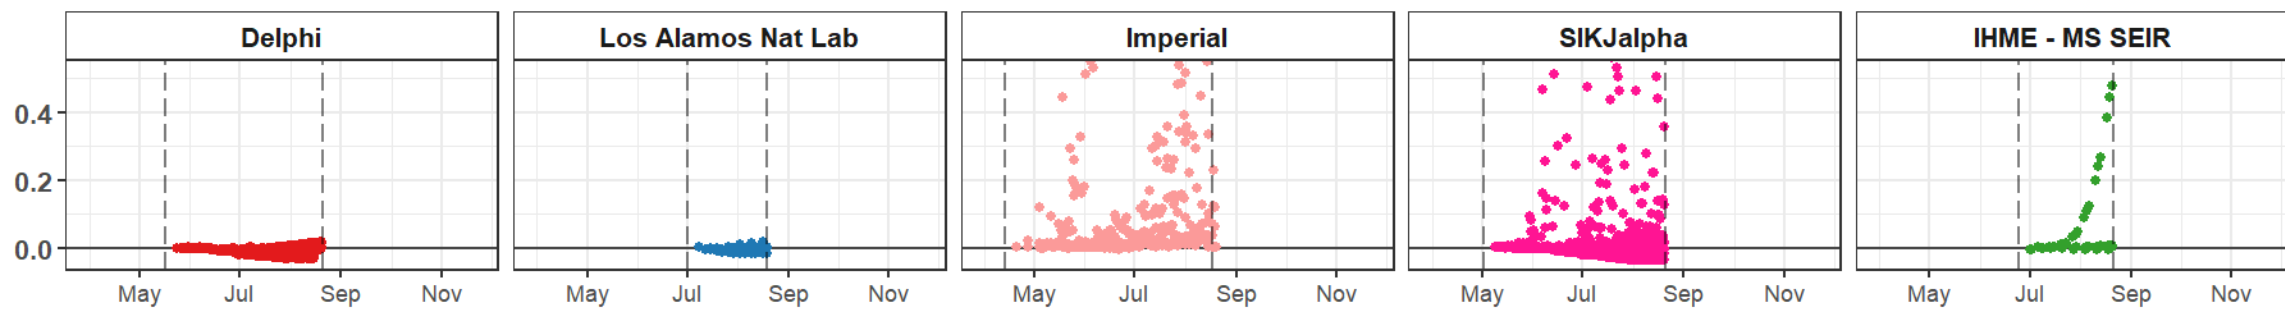

# Cape Verde

## Current Forecast

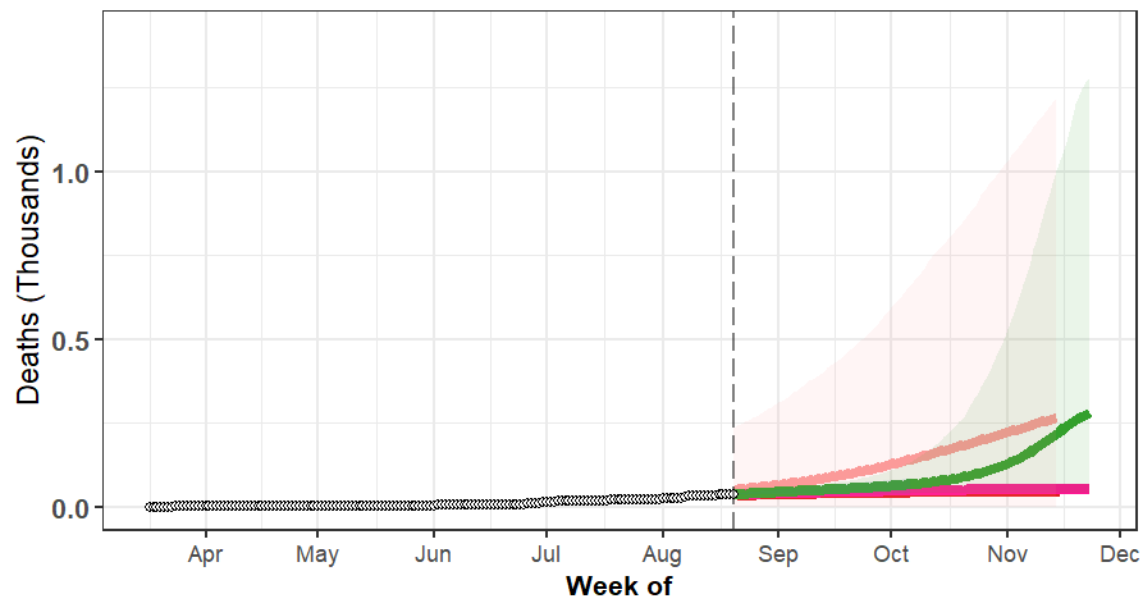

## Cumulative Out-Of-Sample Error (Post Intercept Shift)

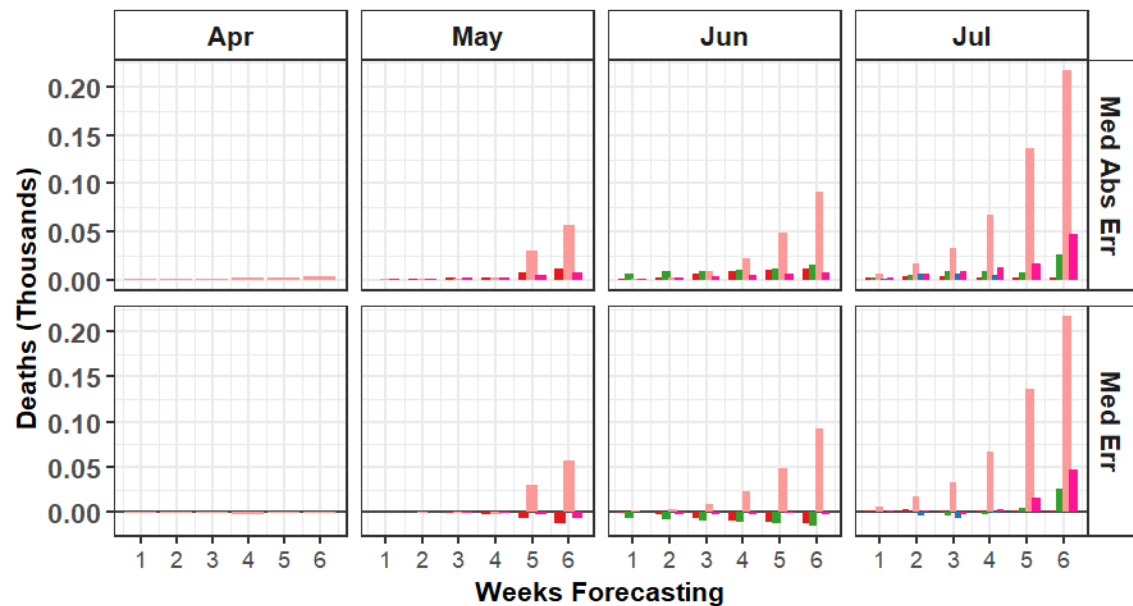

## All Model Versions

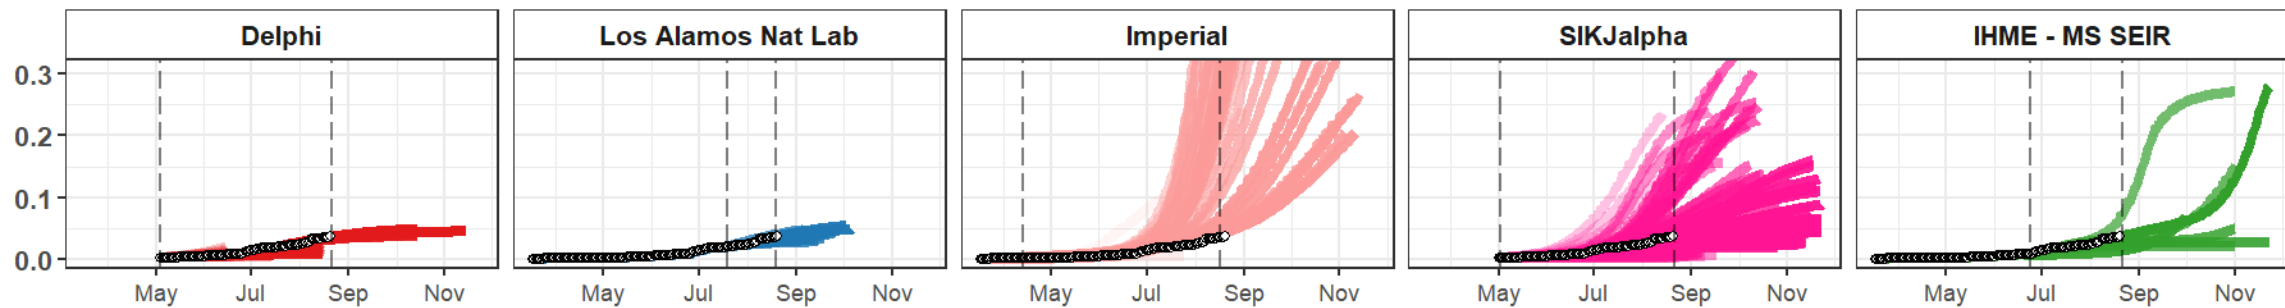

## All Cumulative Errors

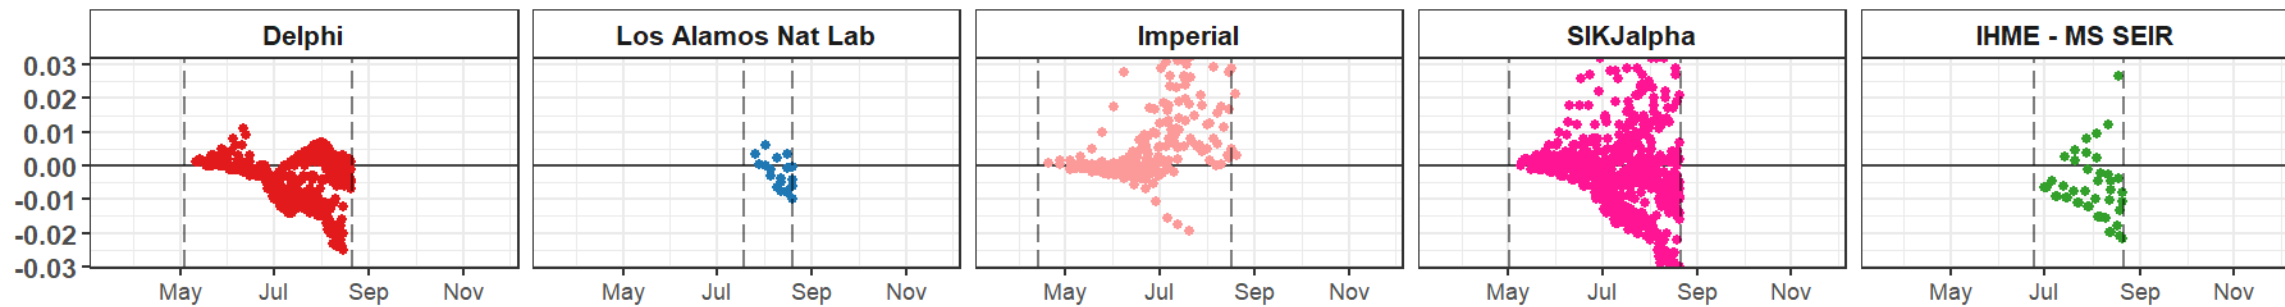

# Wyoming

## Current Forecast

█ Delphi 
 █ Los Alamos Nat Lab 
 █ Youyang Gu 
 █ SIKJalpha 
 █ IHME - MS SEIR 
 ◊ JHU

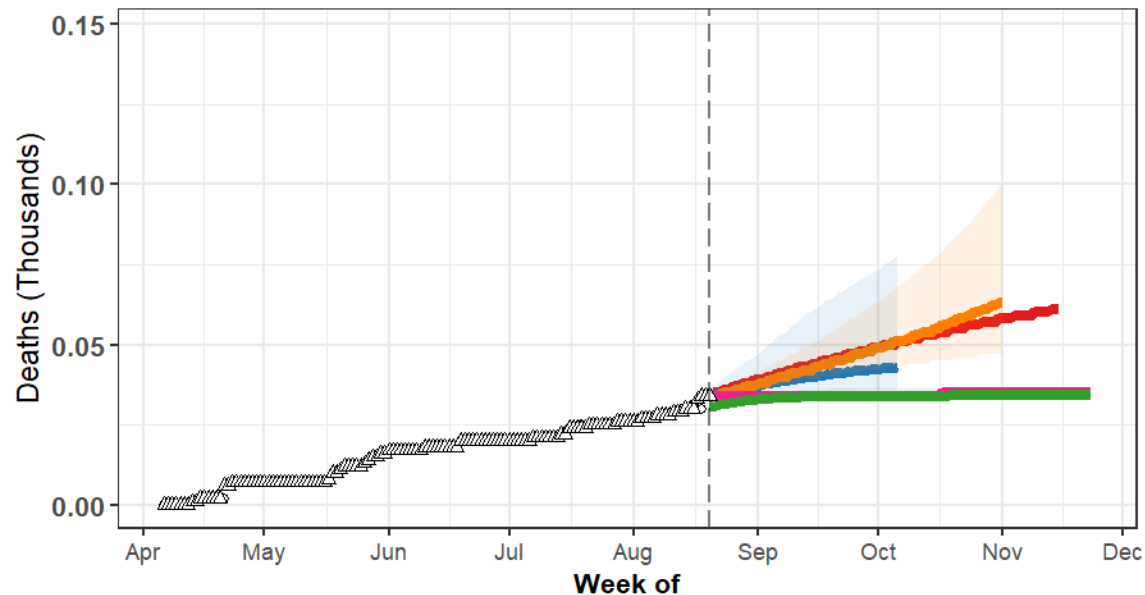

## Cumulative Out-Of-Sample Error (Post Intercept Shift)

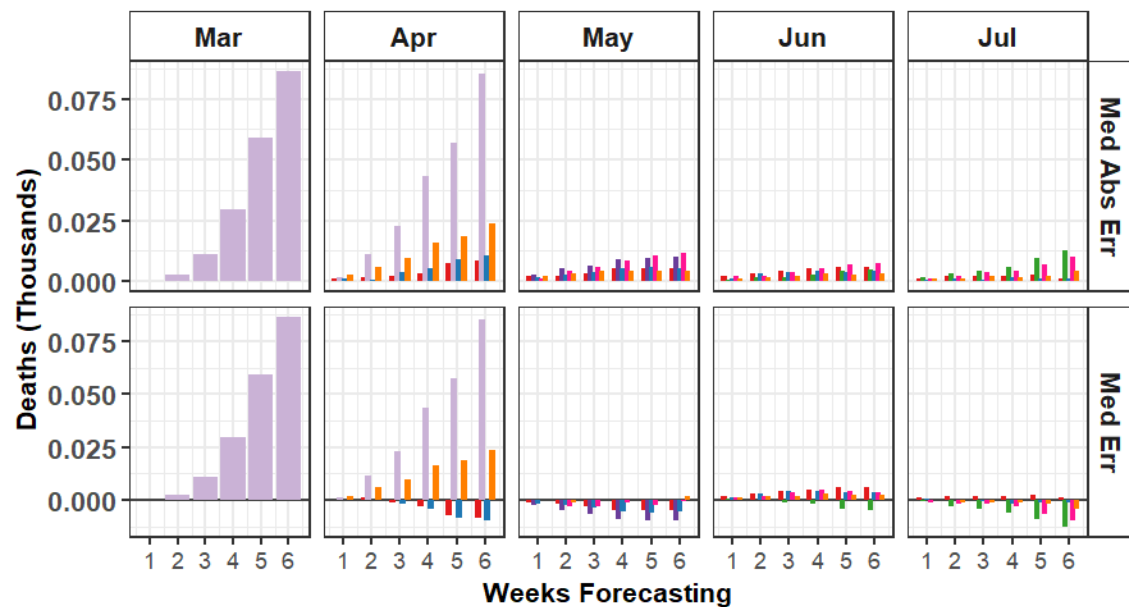

## All Model Versions

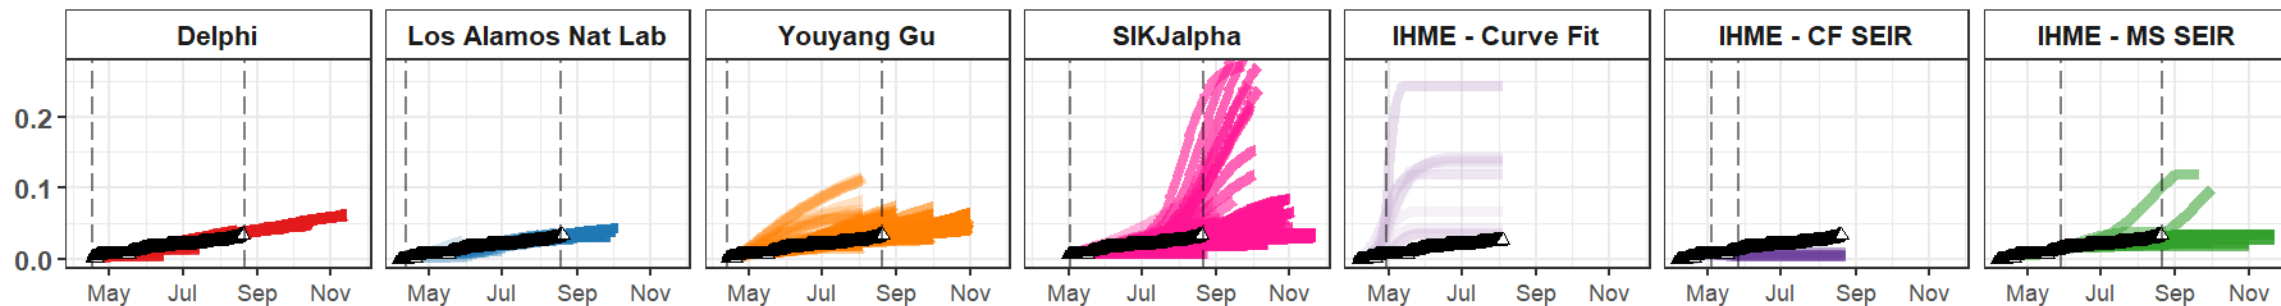

## All Cumulative Errors

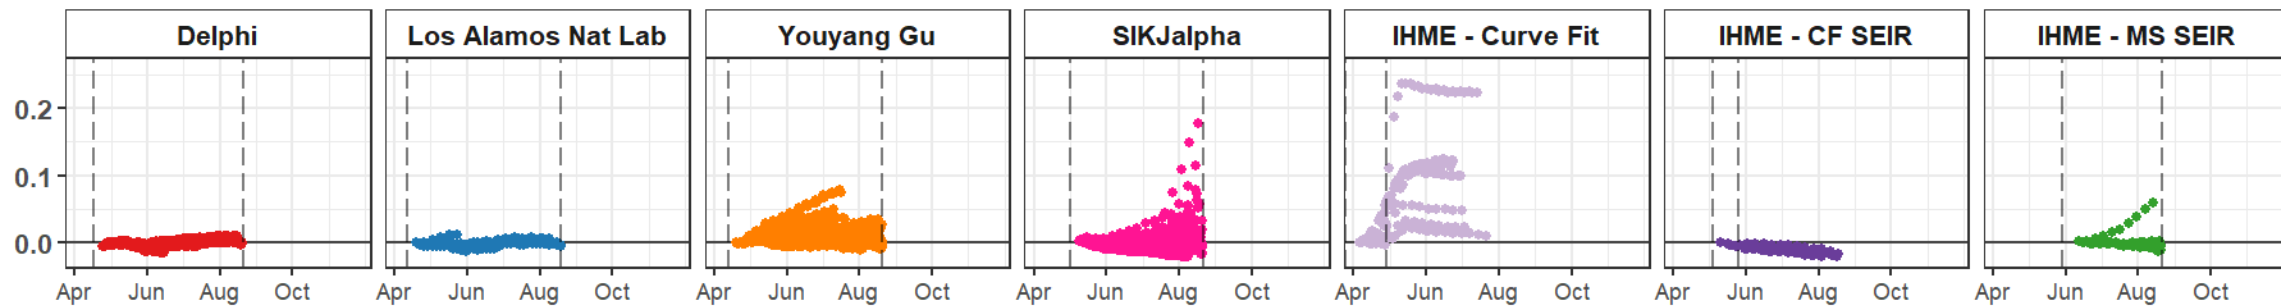

# Guinea-Bissau

## Current Forecast

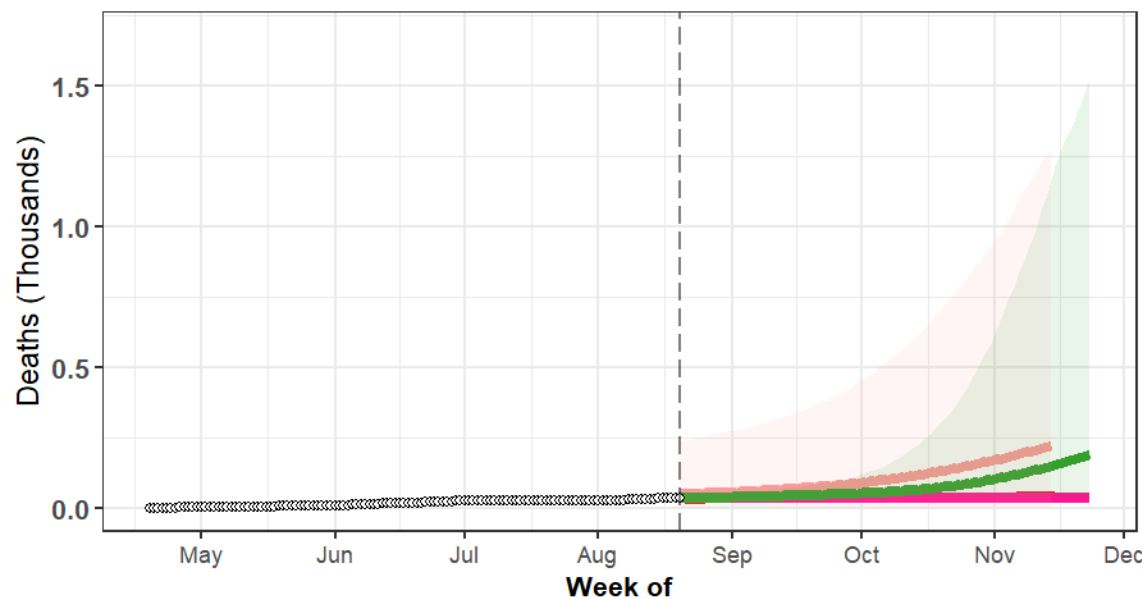

## Cumulative Out-Of-Sample Error (Post Intercept Shift)

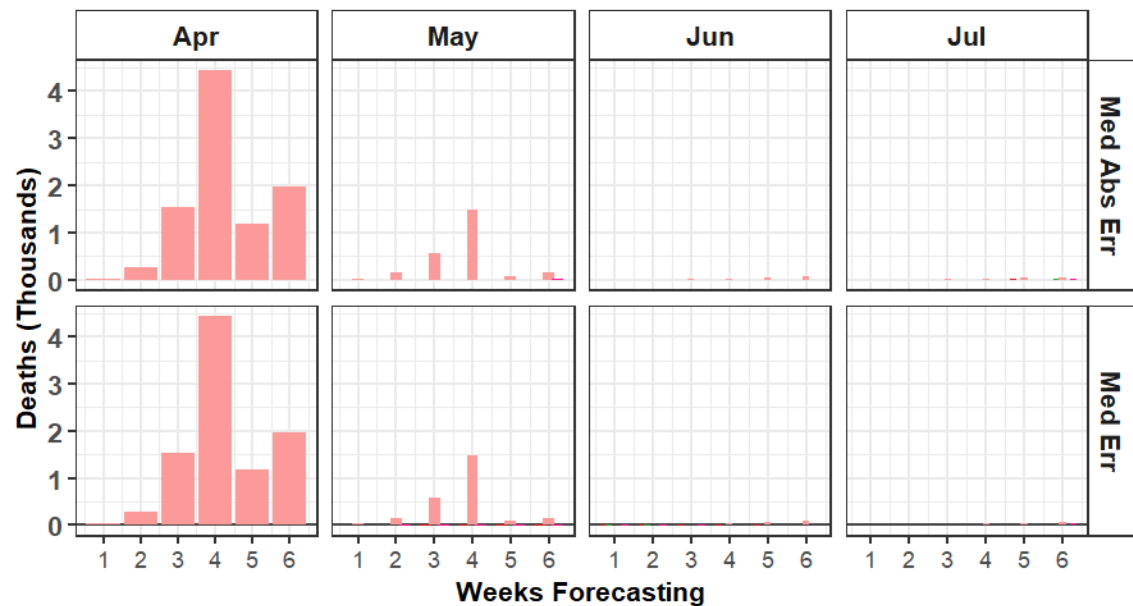

## All Model Versions

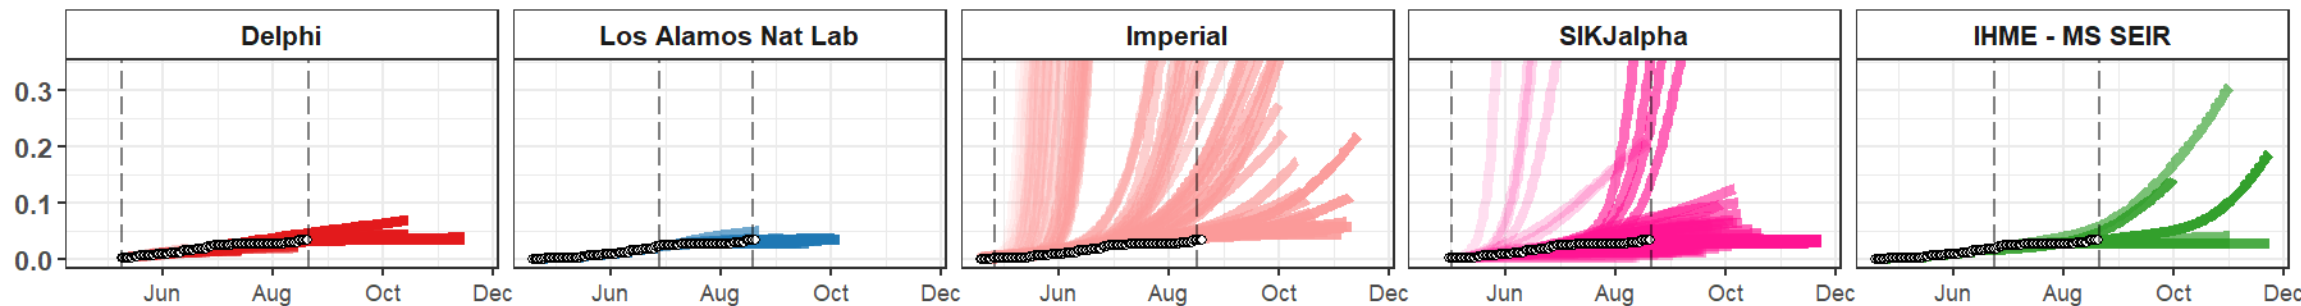

## All Cumulative Errors

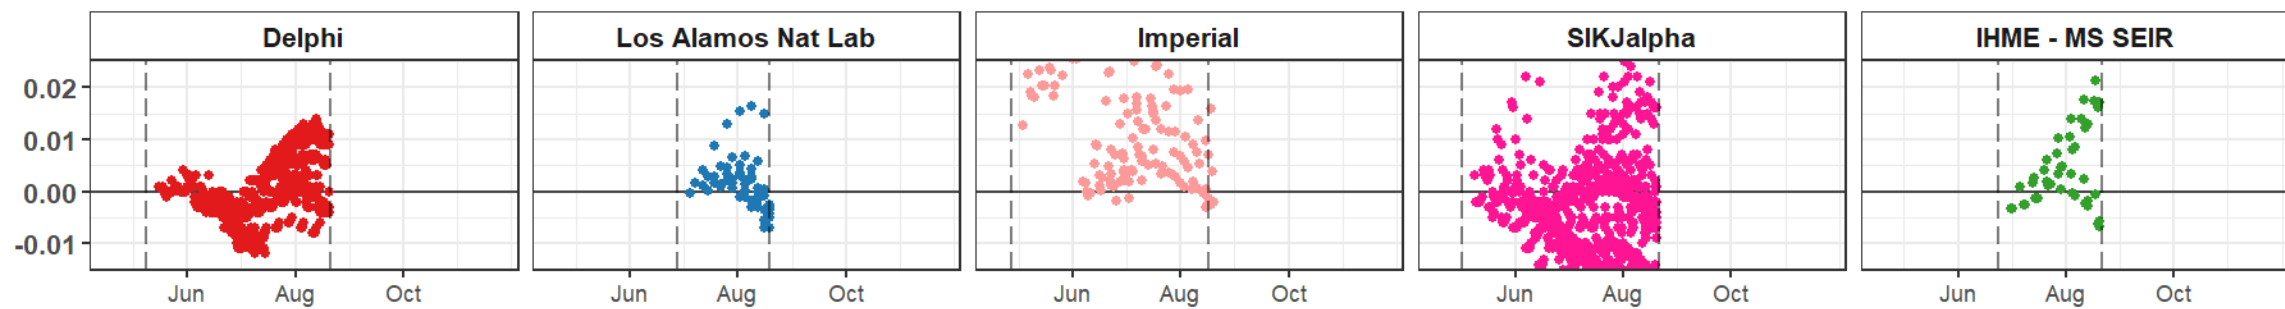

# Latvia

## Current Forecast

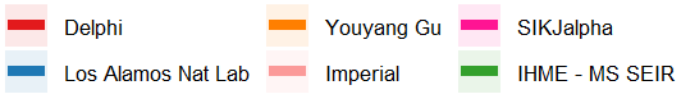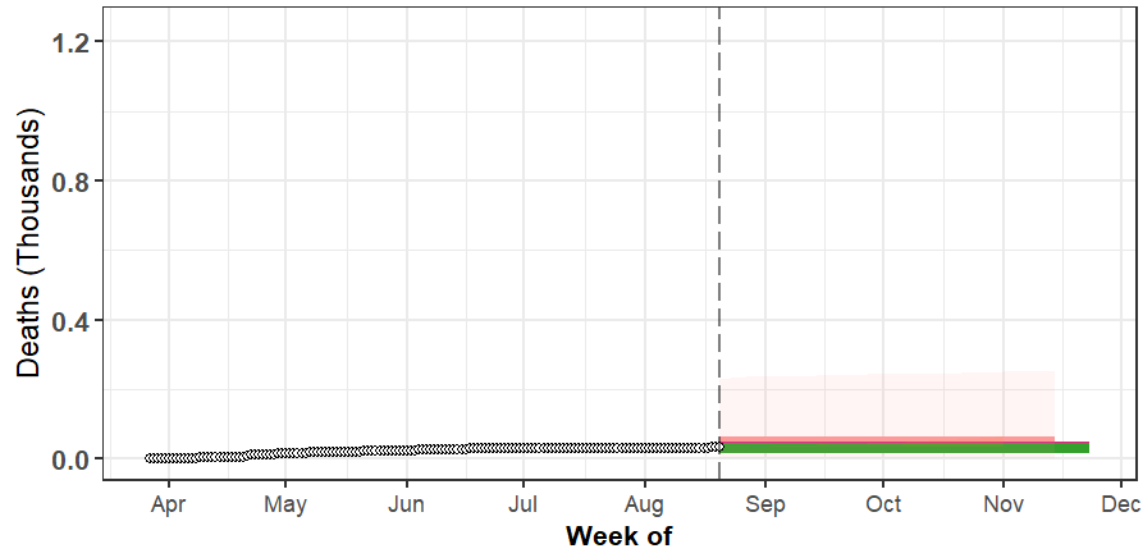

## Cumulative Out-Of-Sample Error (Post Intercept Shift)

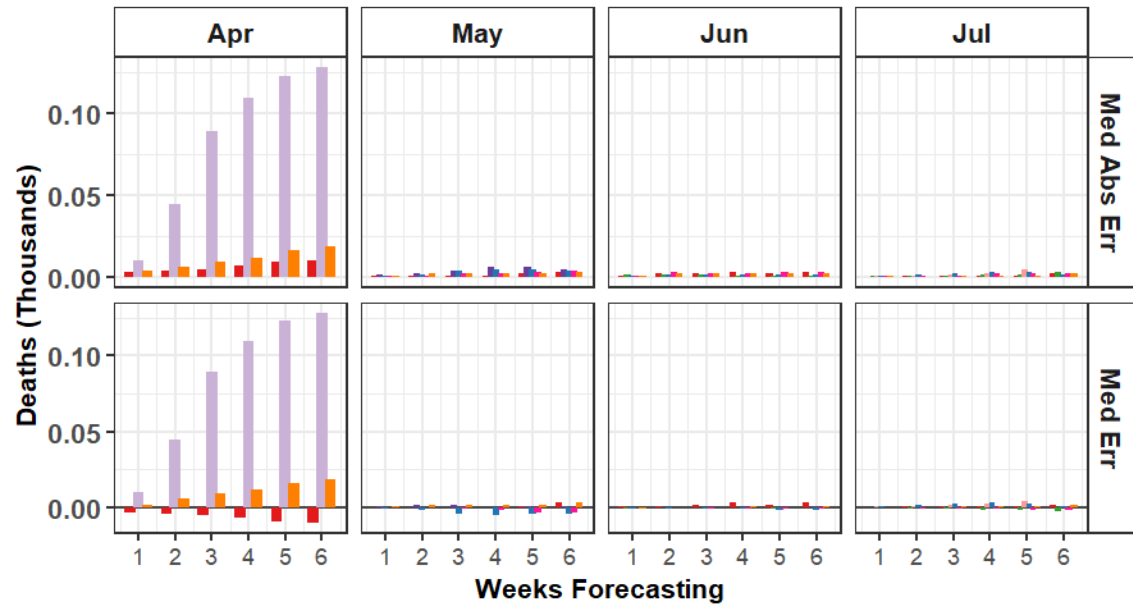

## All Model Versions

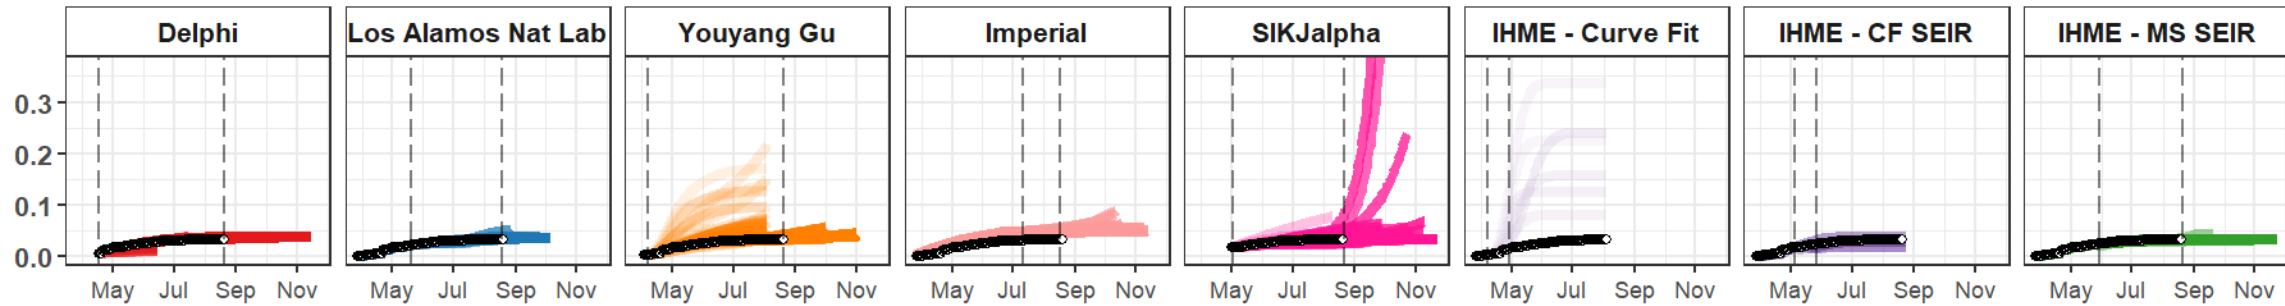

## All Cumulative Errors

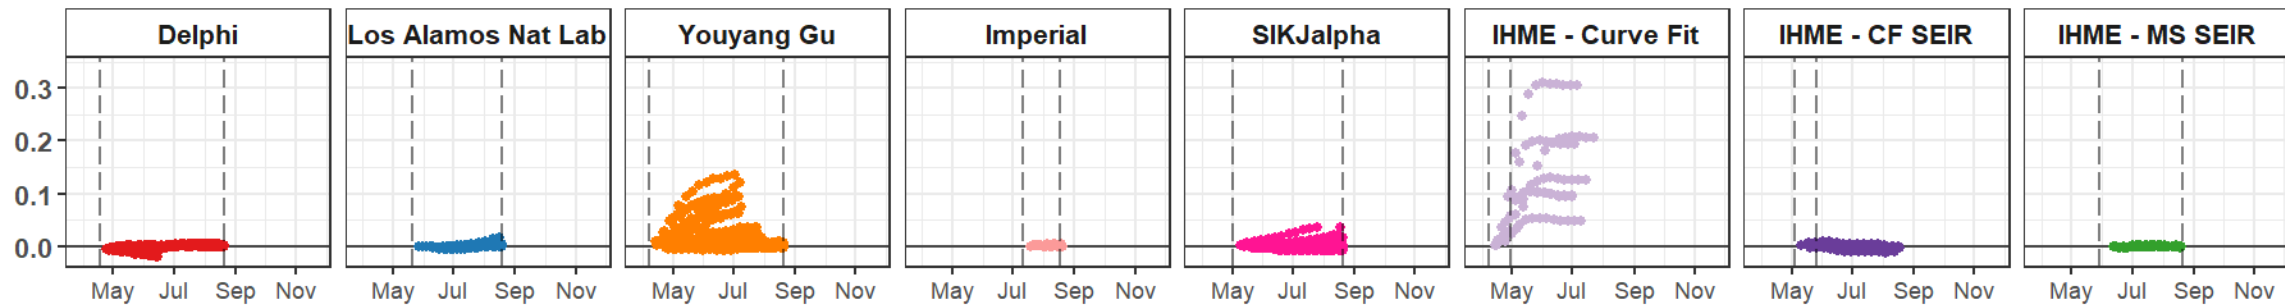

# Slovakia

## Current Forecast

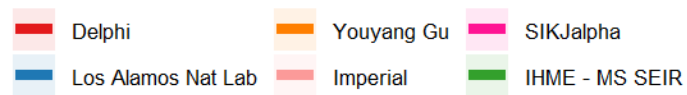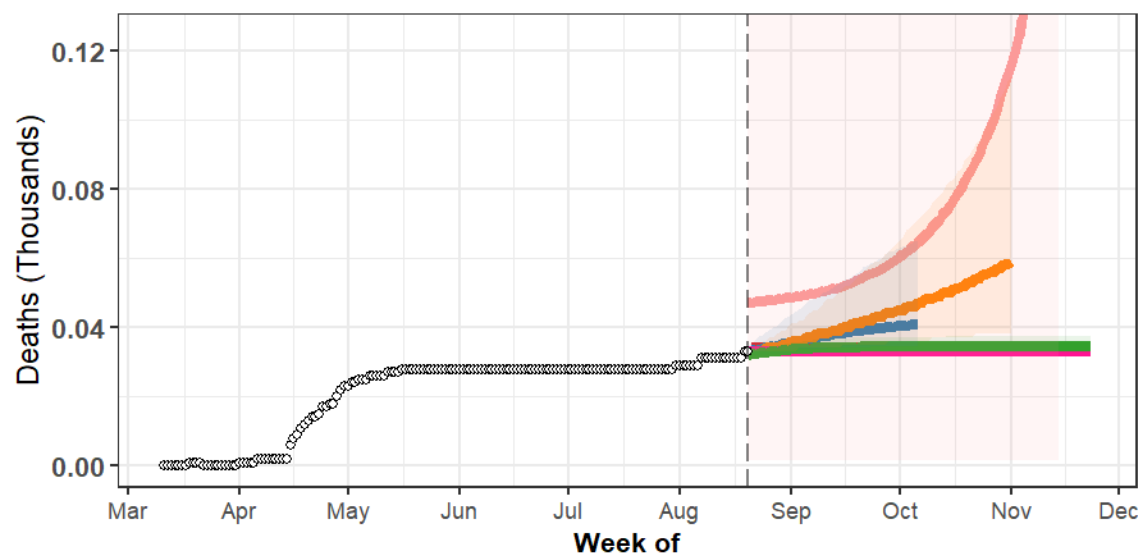

## Cumulative Out-Of-Sample Error (Post Intercept Shift)

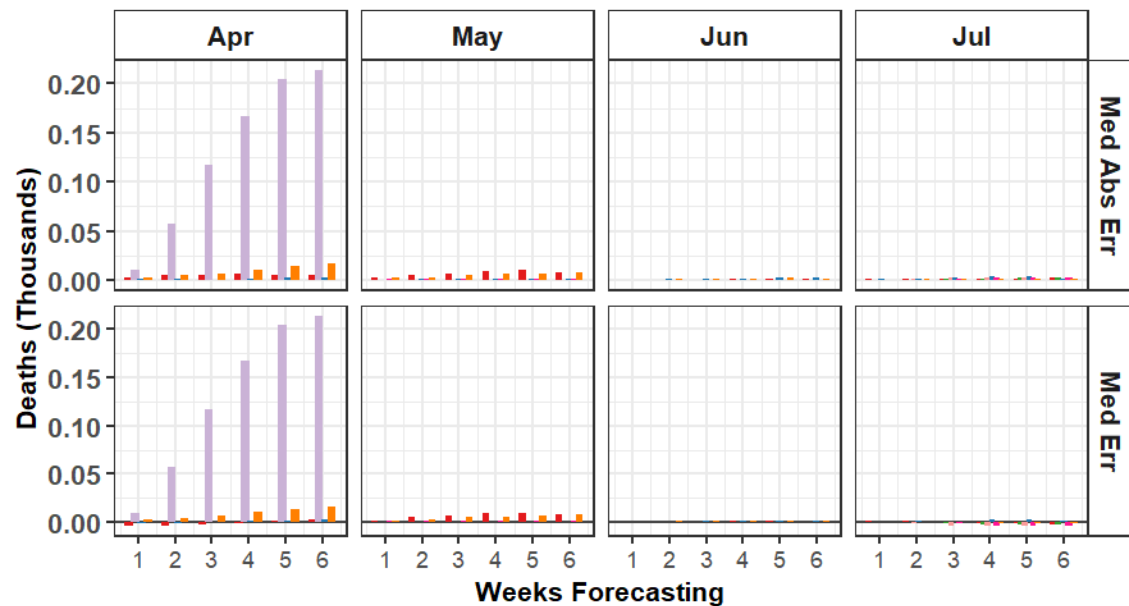

## All Model Versions

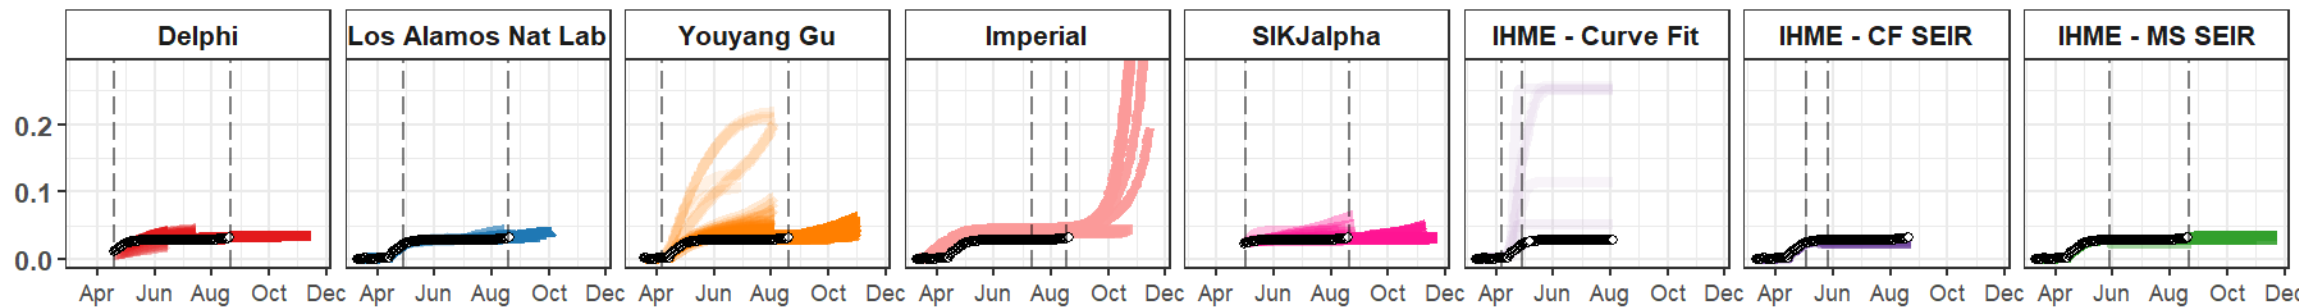

## All Cumulative Errors

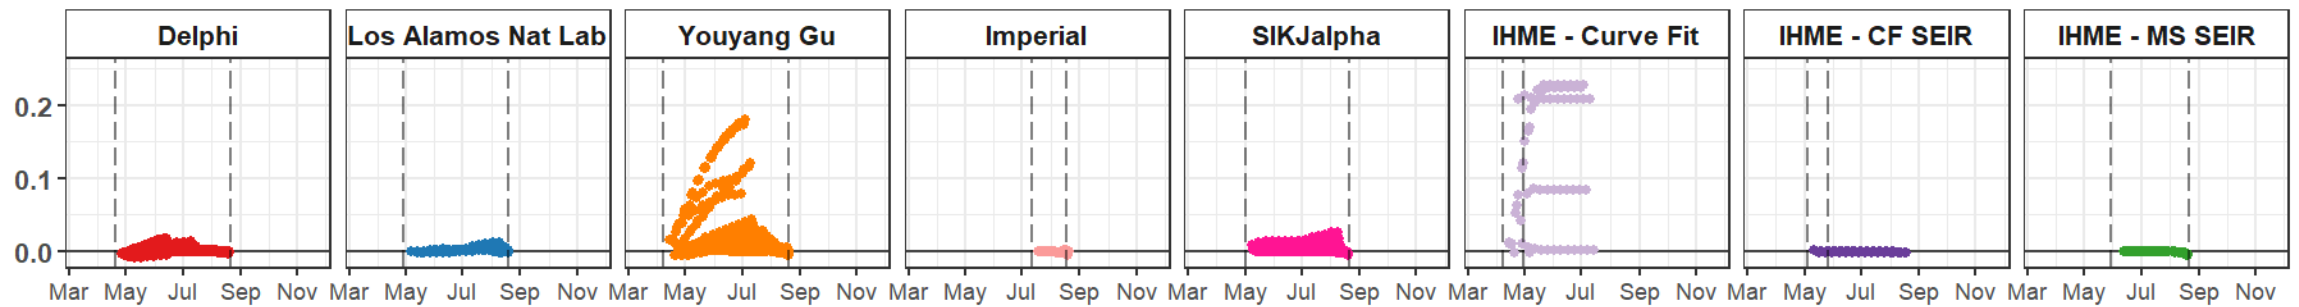

# Lesotho

## Current Forecast

Delphi Los Alamos Nat Lab Imperial

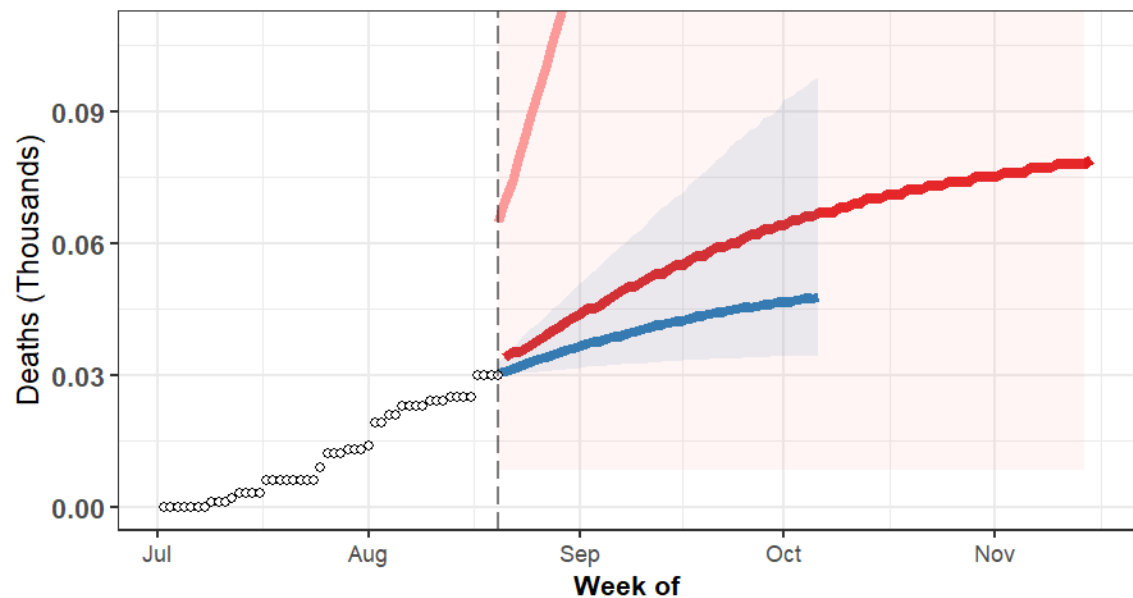

## Cumulative Out-Of-Sample Error (Post Intercept Shift)

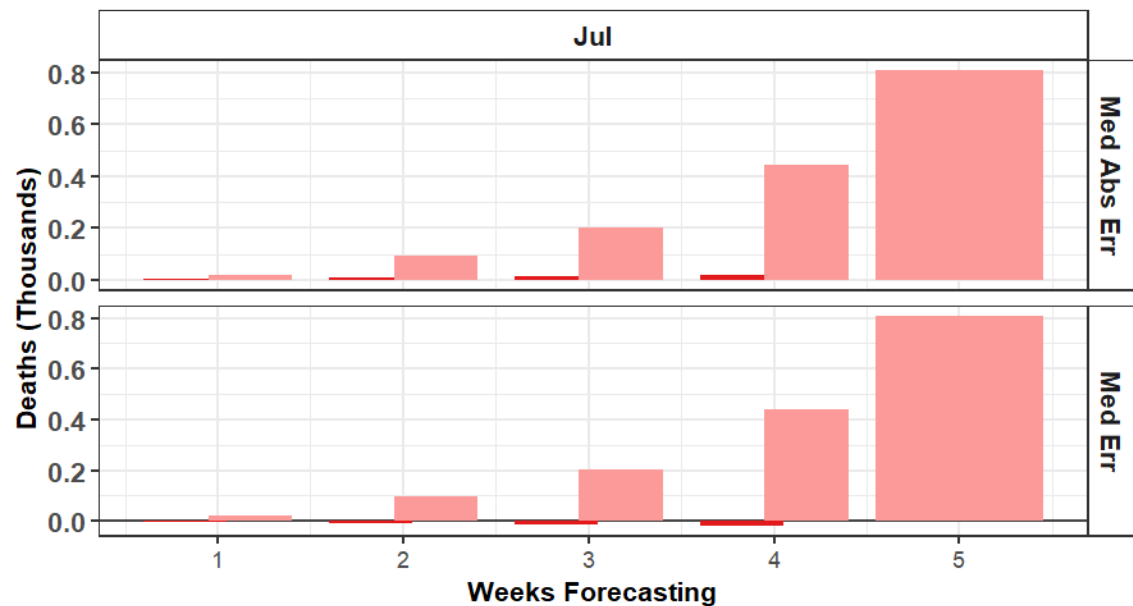

## All Model Versions

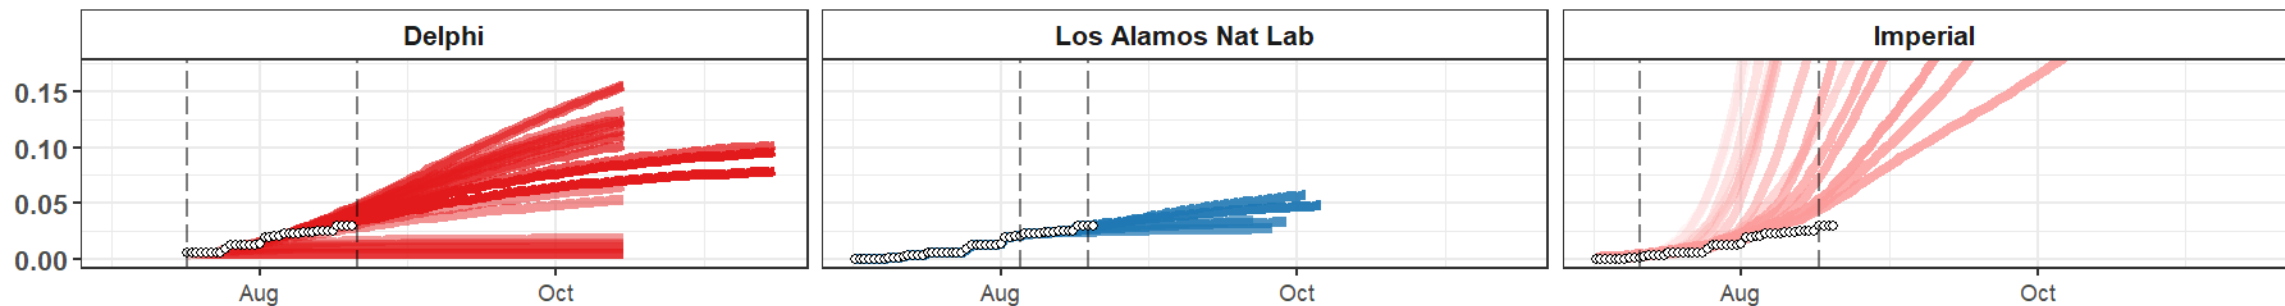

## All Cumulative Errors

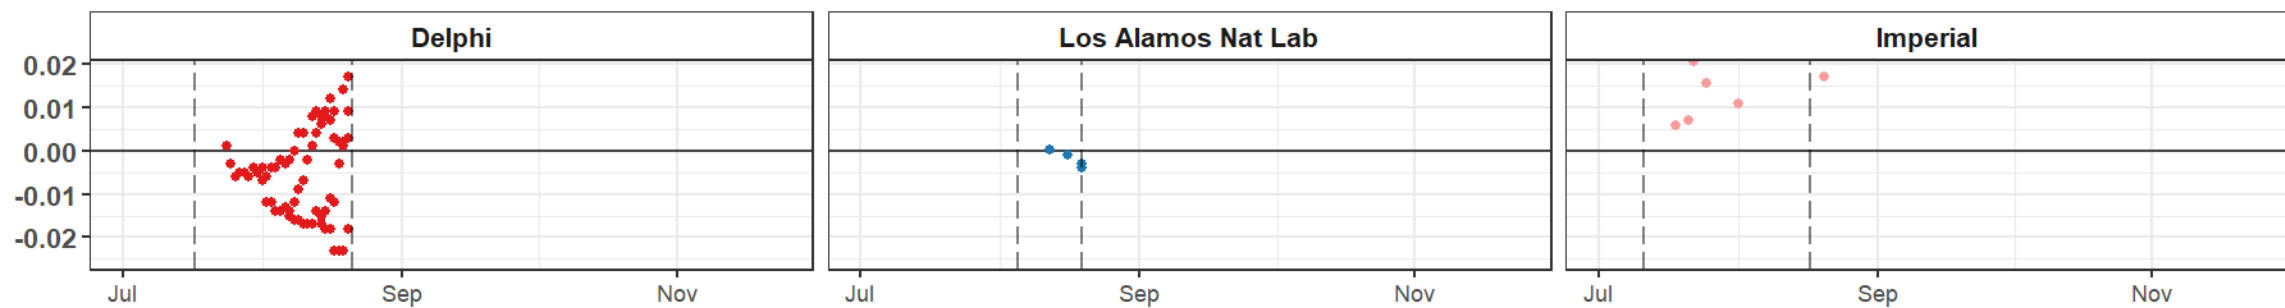

# Guyana

## Current Forecast

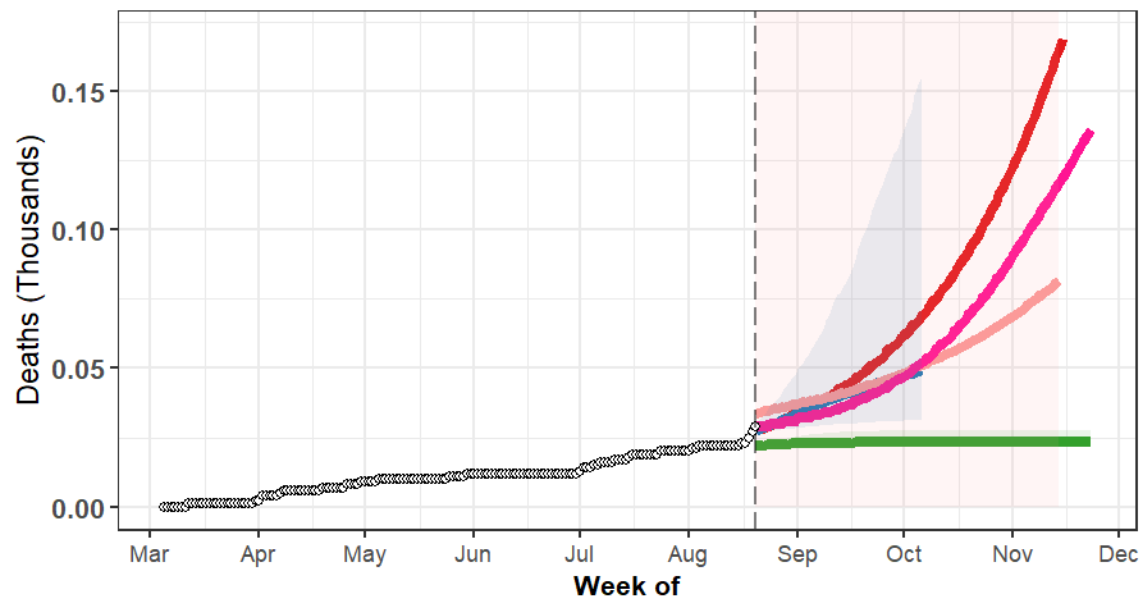

## Cumulative Out-Of-Sample Error (Post Intercept Shift)

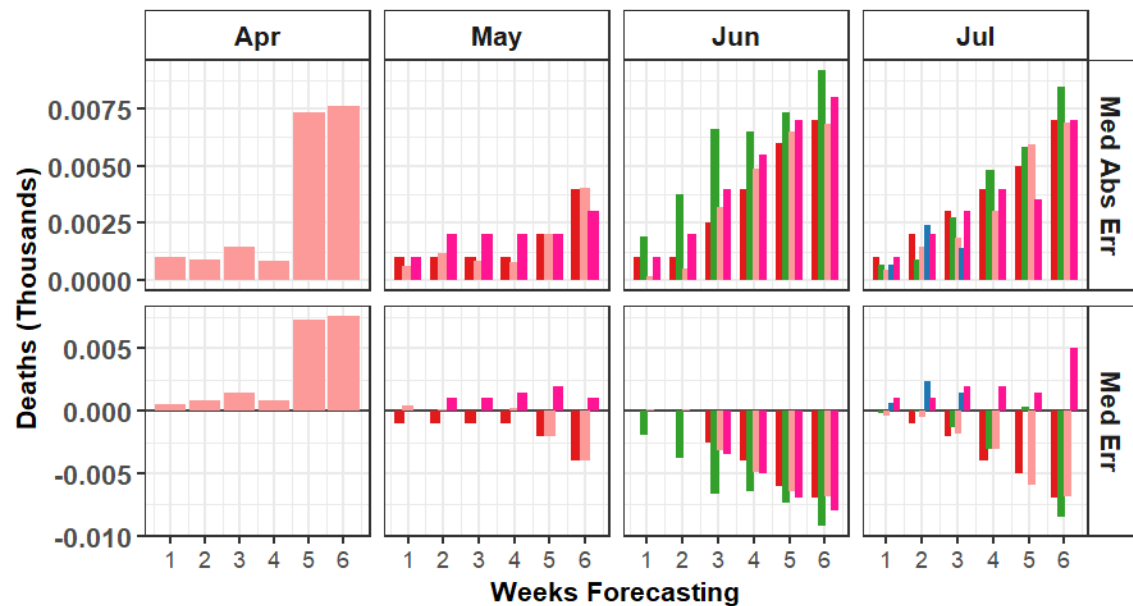

## All Model Versions

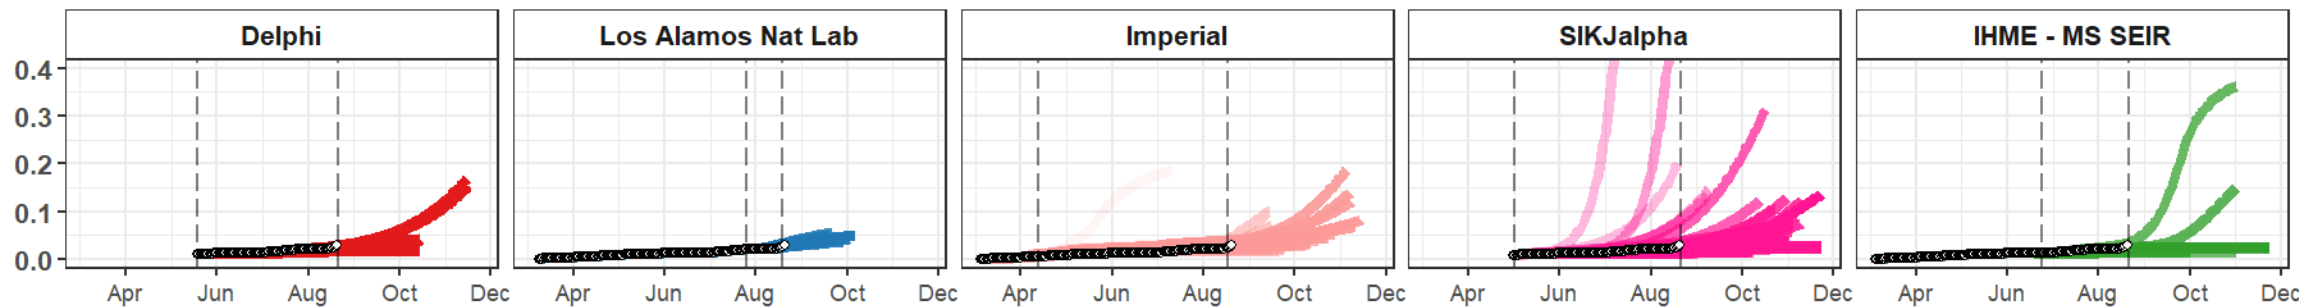

## All Cumulative Errors

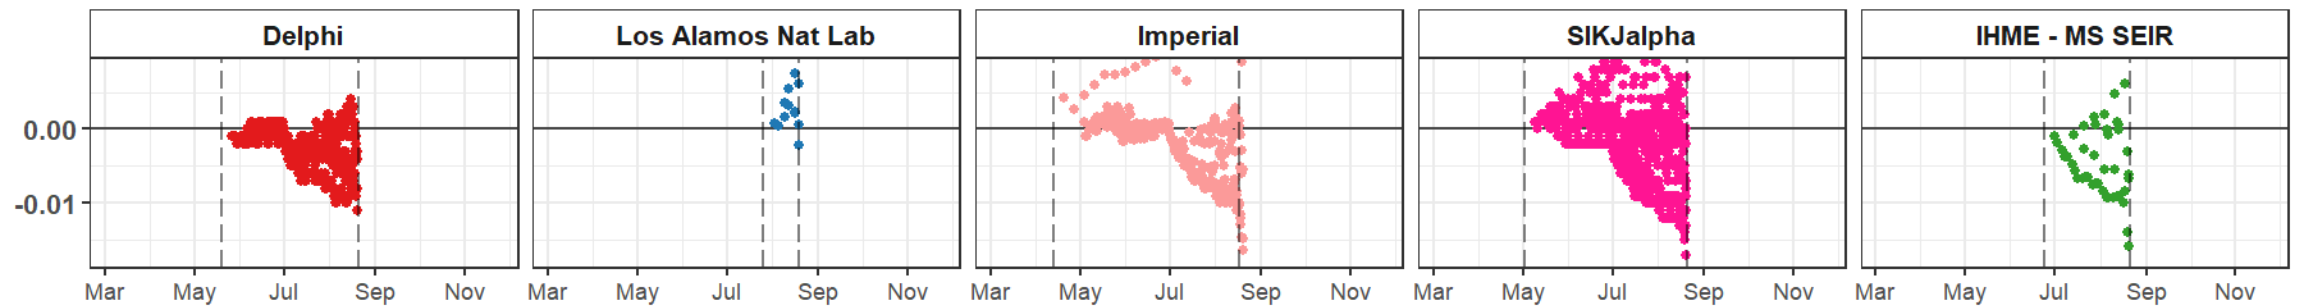



# Alaska

## Current Forecast

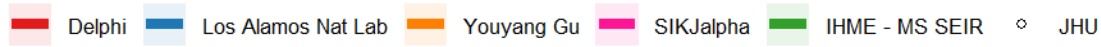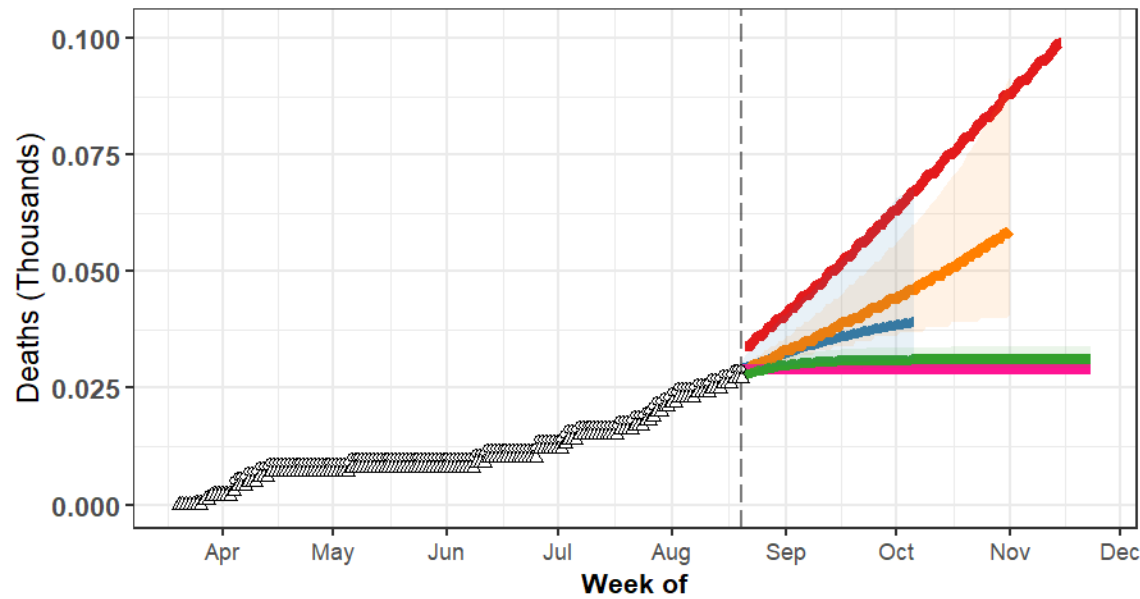

## Cumulative Out-Of-Sample Error (Post Intercept Shift)

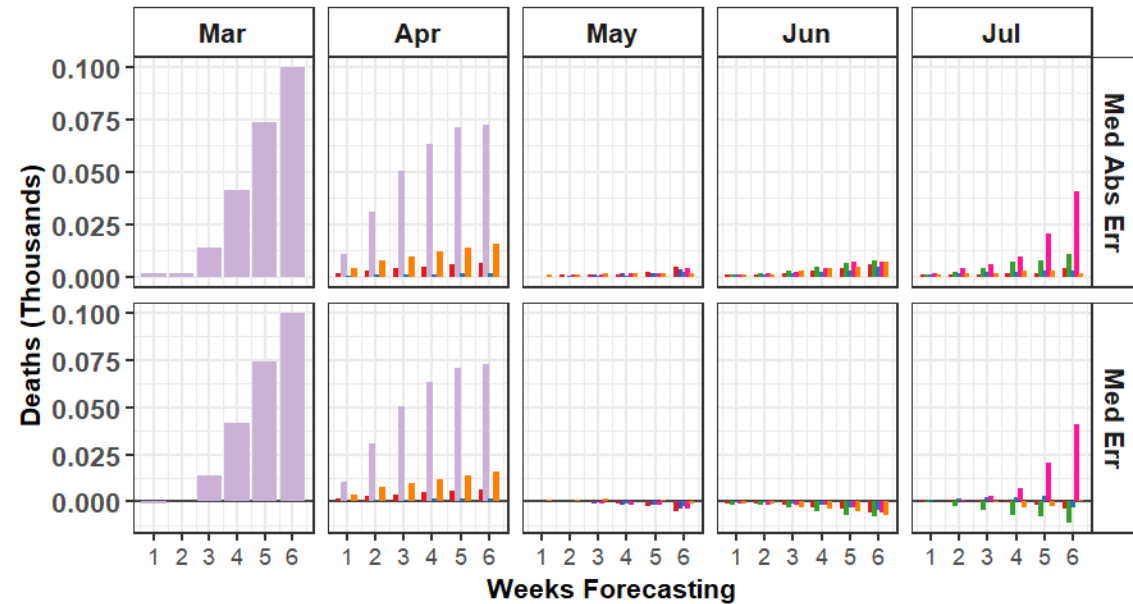

## All Model Versions

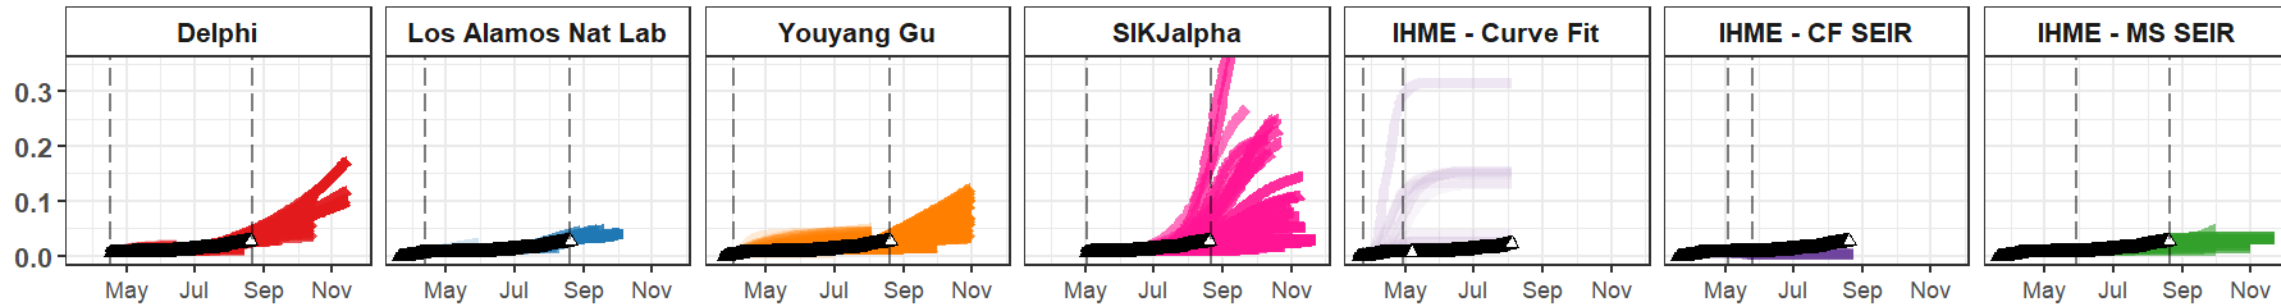

## All Cumulative Errors

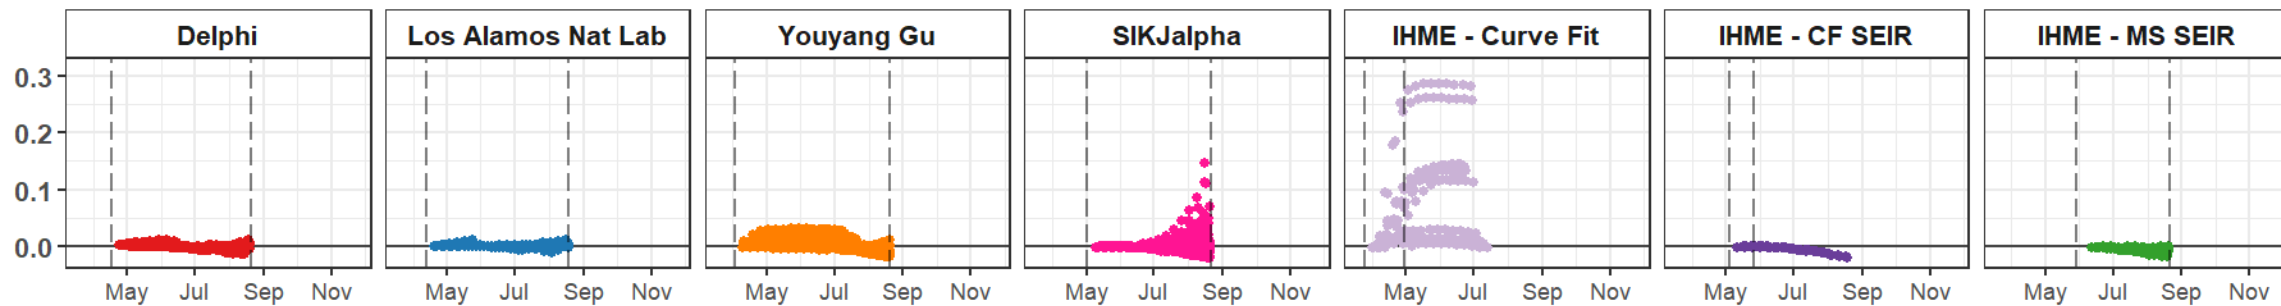

# Singapore

## Current Forecast

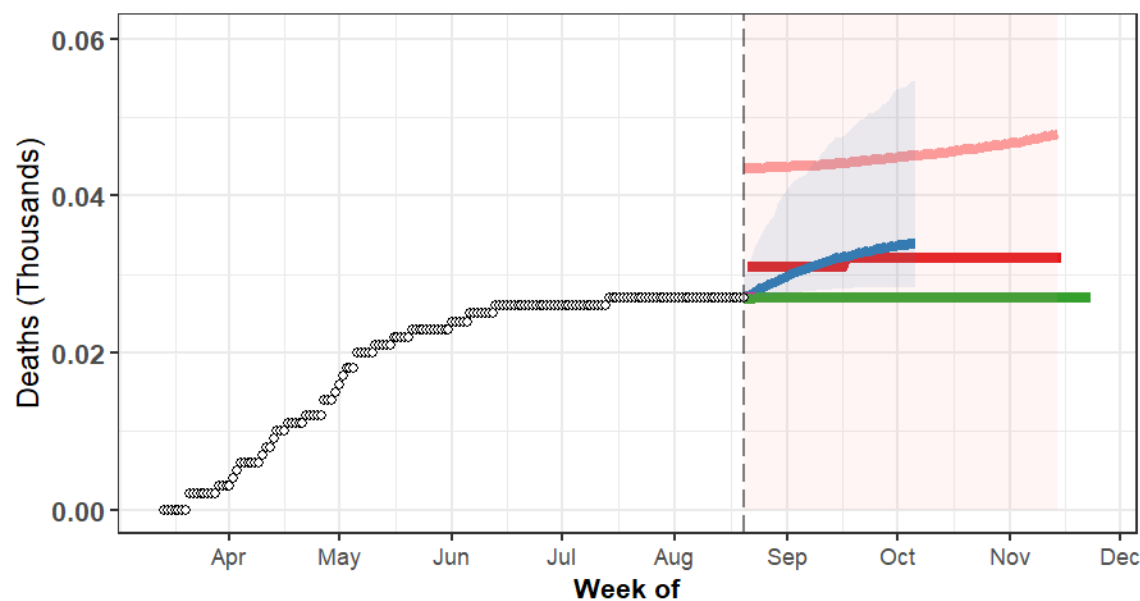

## Cumulative Out-Of-Sample Error (Post Intercept Shift)

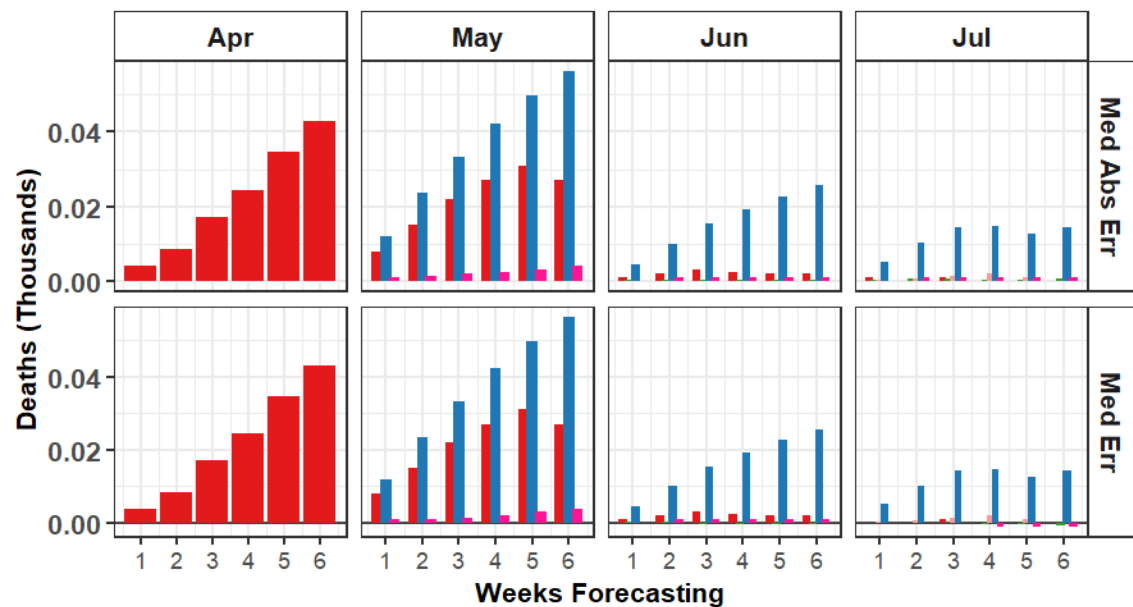

## All Model Versions

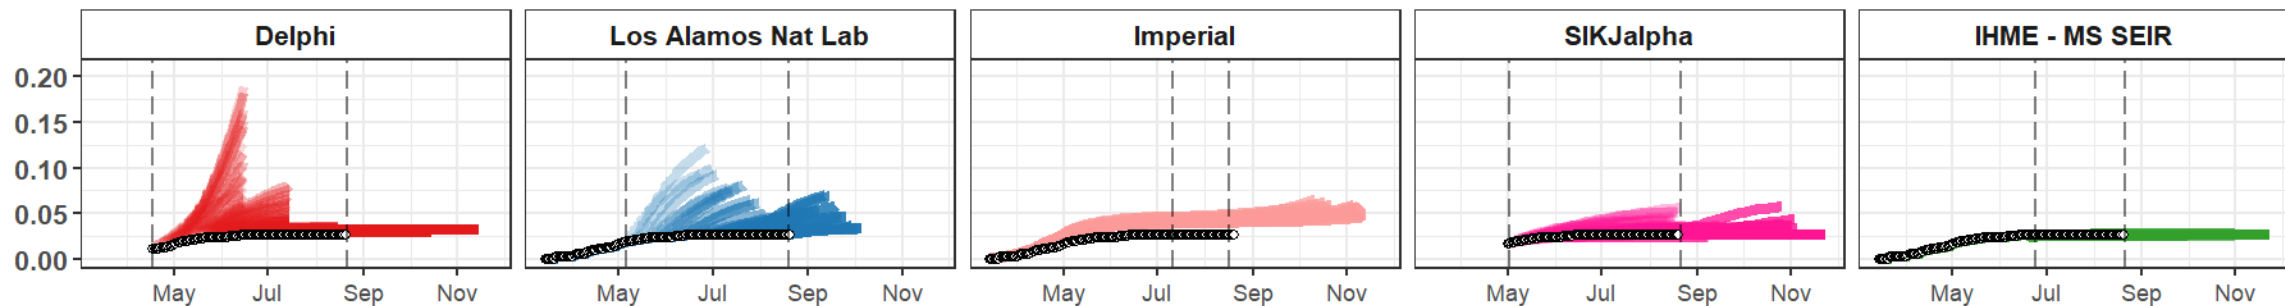

## All Cumulative Errors

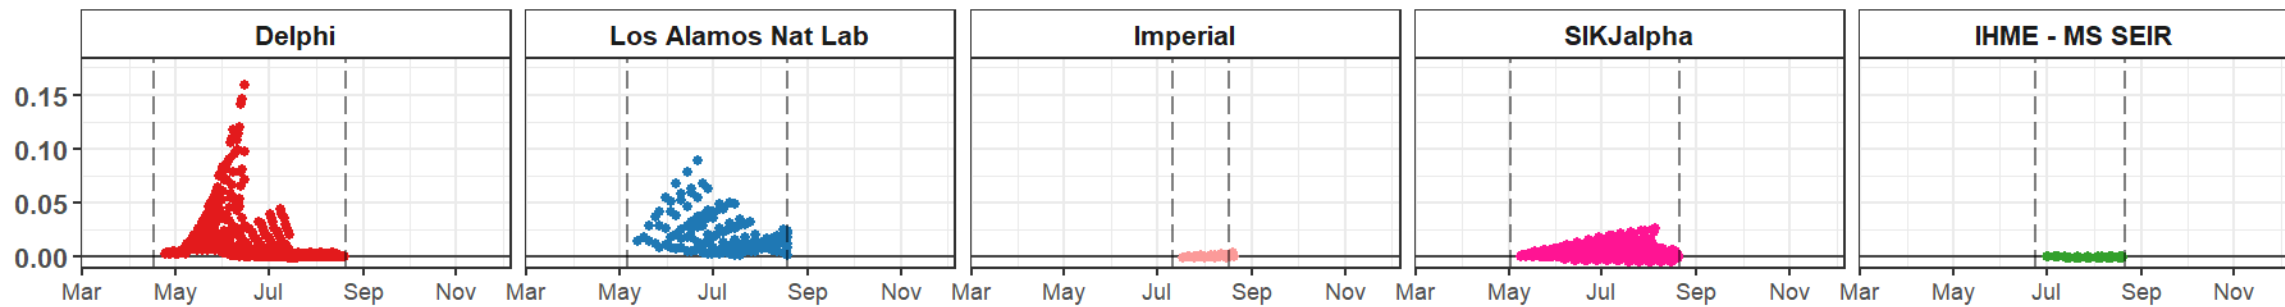

# Togo

## Current Forecast

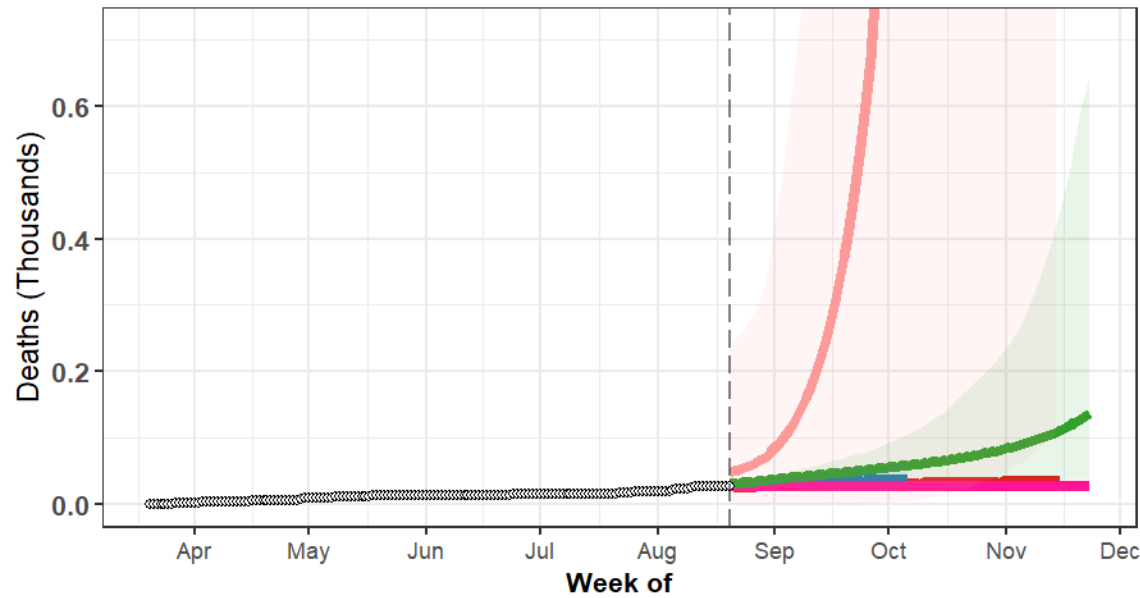

## Cumulative Out-Of-Sample Error (Post Intercept Shift)

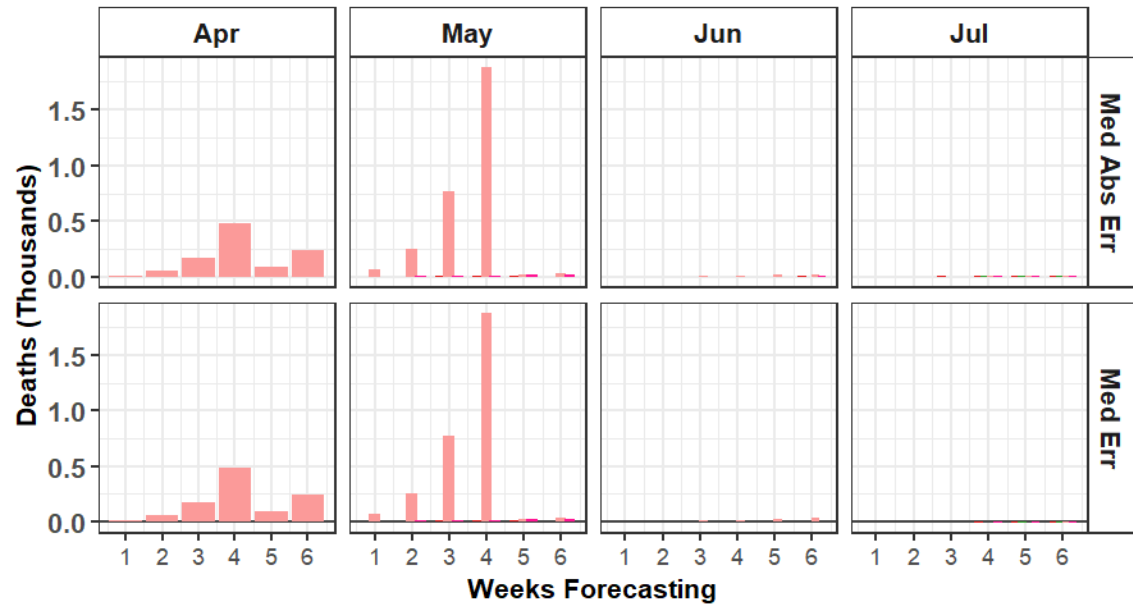

## All Model Versions

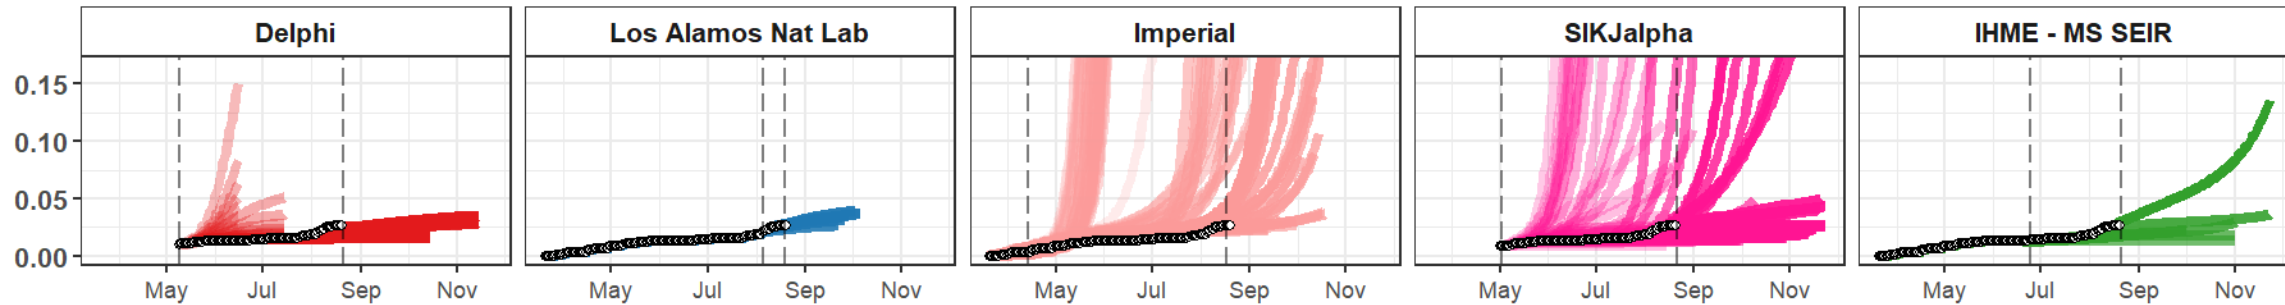

## All Cumulative Errors

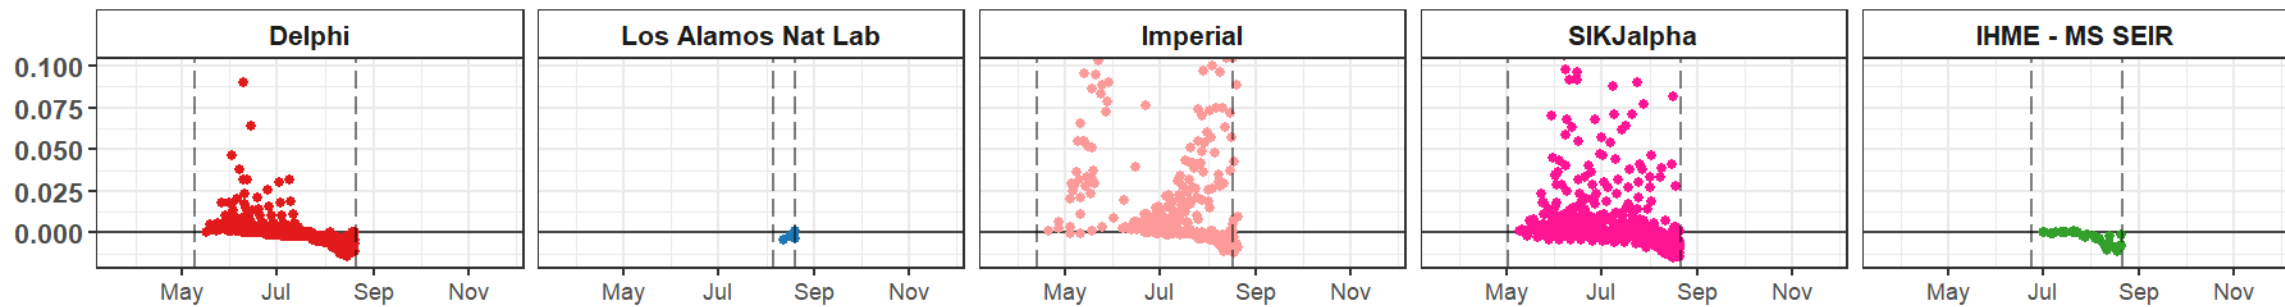

# Vietnam

## Current Forecast

Delphi Los Alamos Nat Lab Imperial SIKJalpha

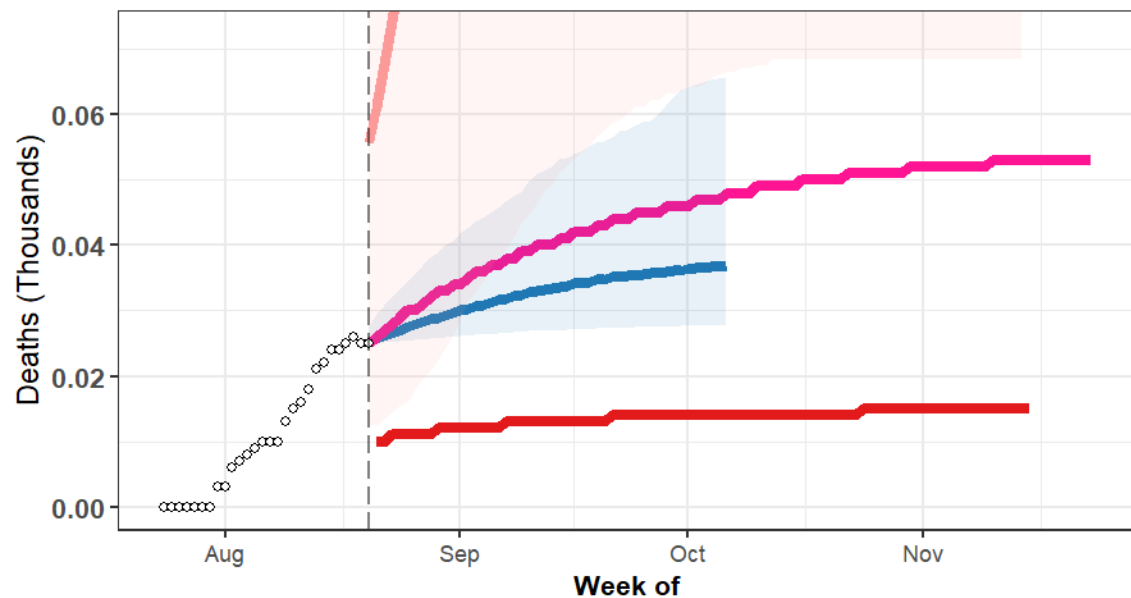

## Cumulative Out-Of-Sample Error (Post Intercept Shift)

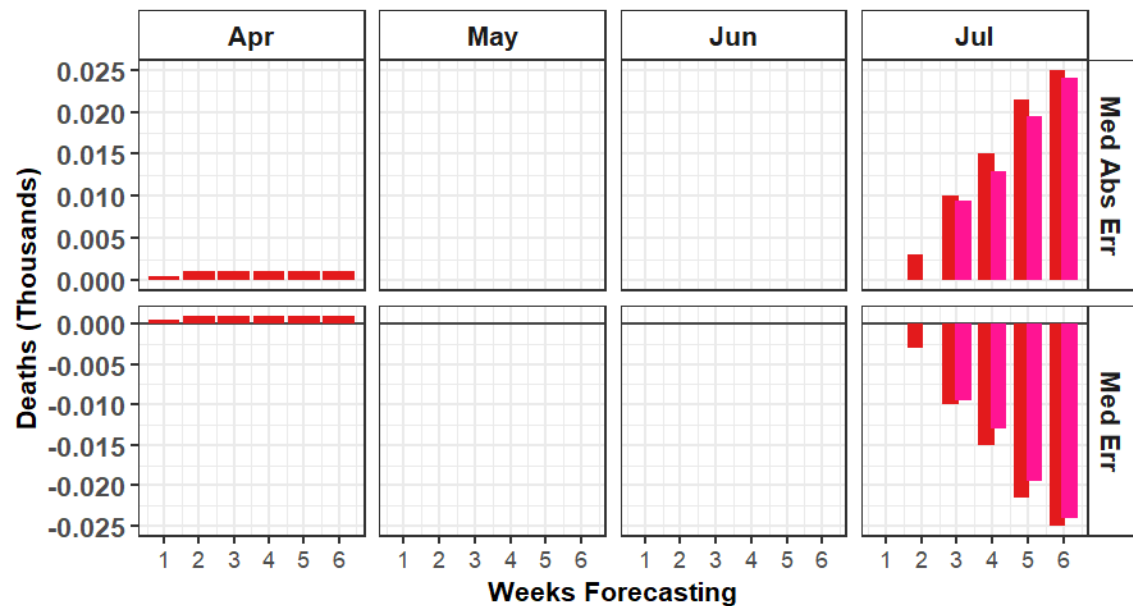

## All Model Versions

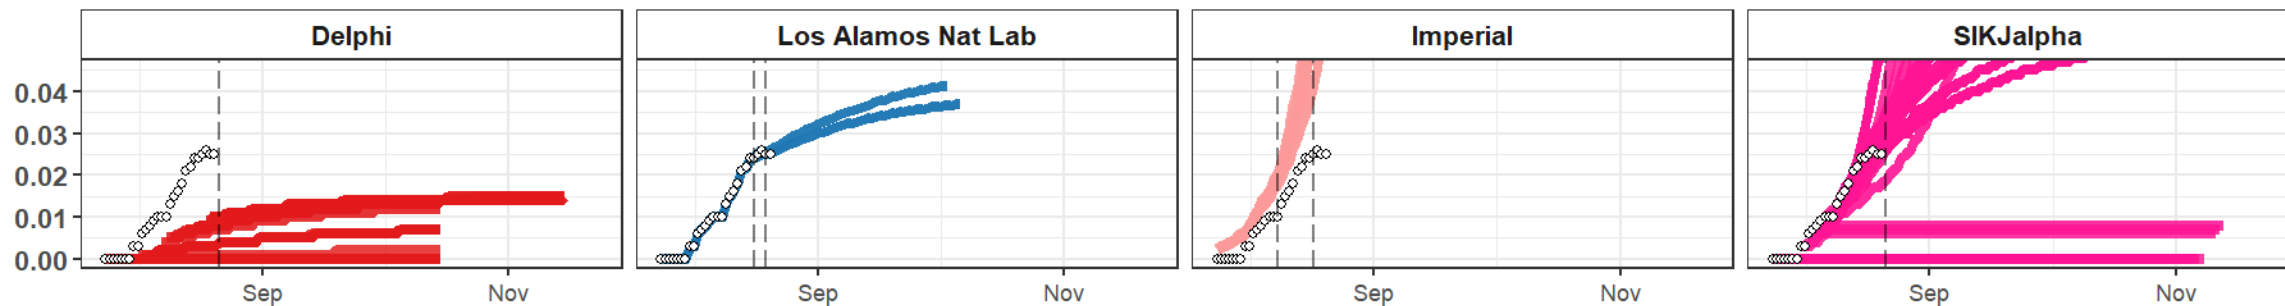

## All Cumulative Errors

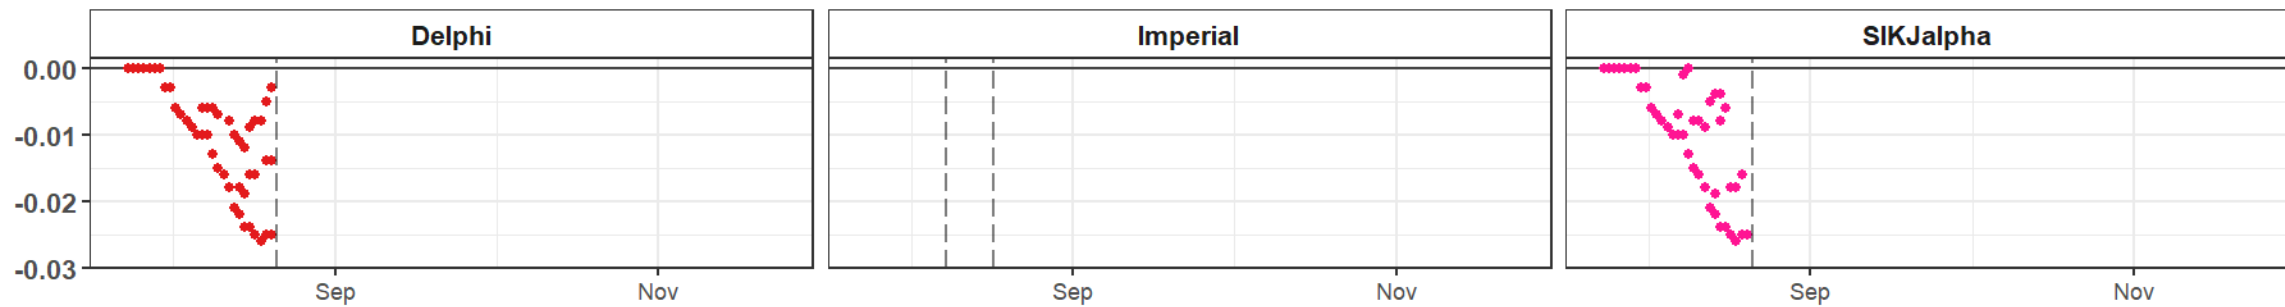

# Maldives

## Current Forecast

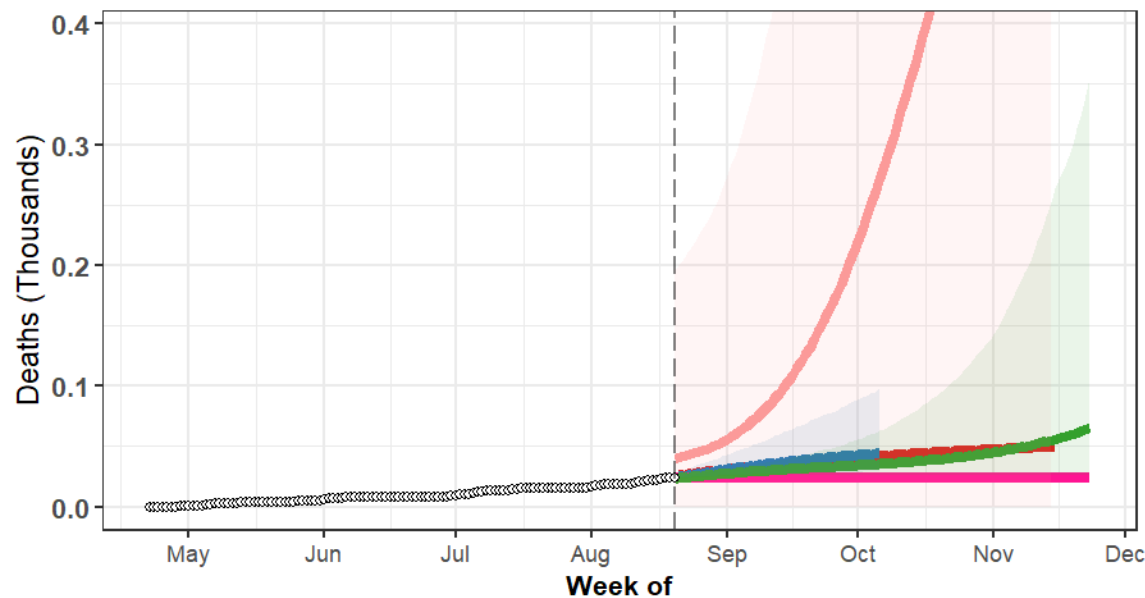

## Cumulative Out-Of-Sample Error (Post Intercept Shift)

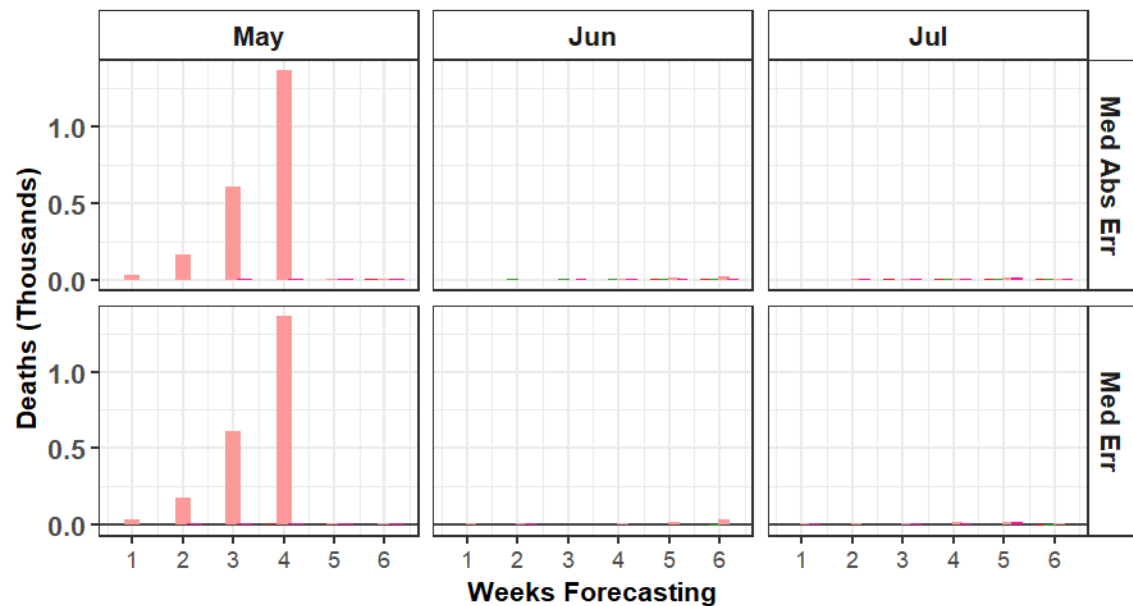

## All Model Versions

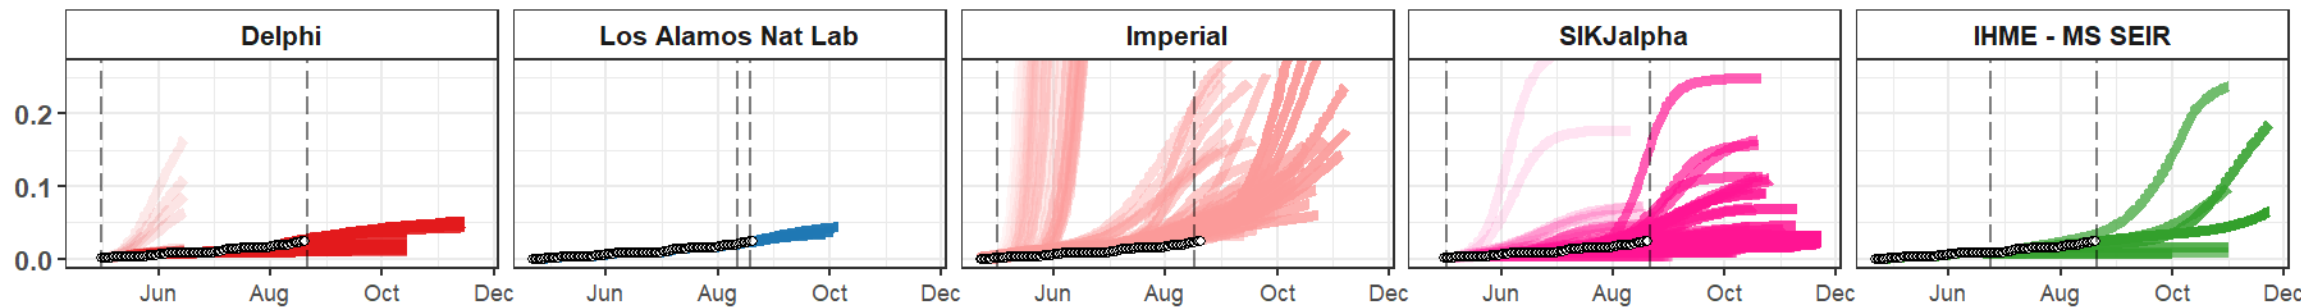

## All Cumulative Errors

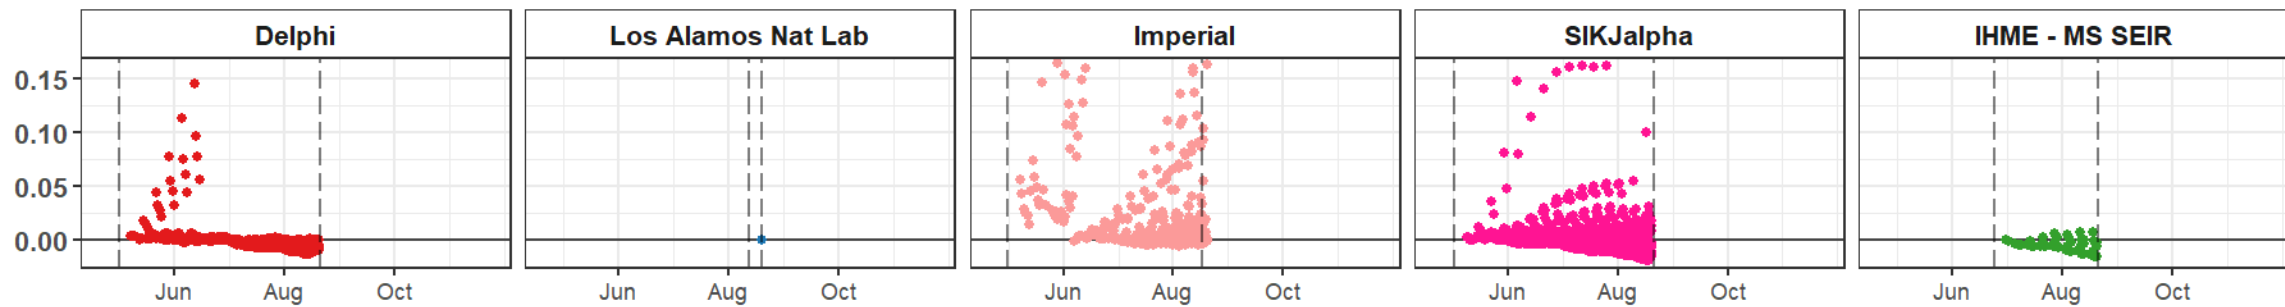

# New Zealand

## Current Forecast

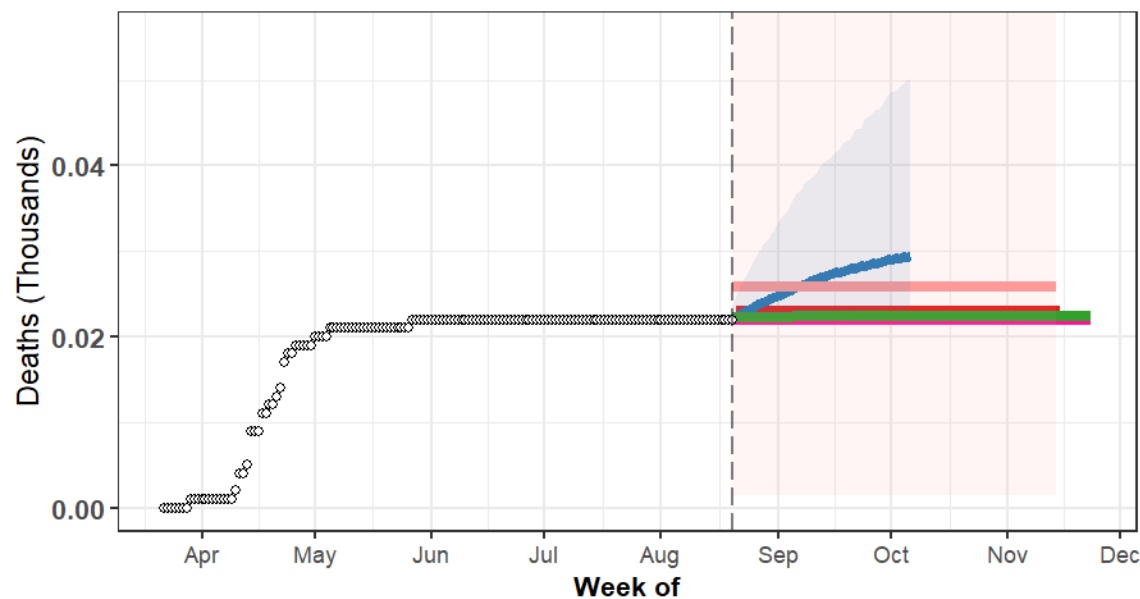

## Cumulative Out-Of-Sample Error (Post Intercept Shift)

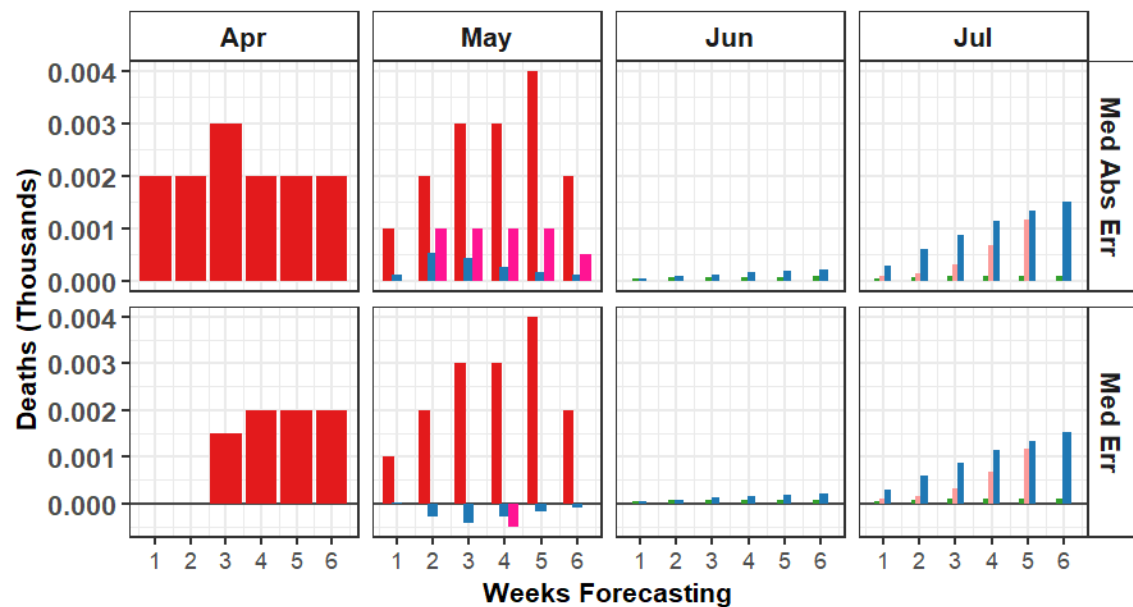

## All Model Versions

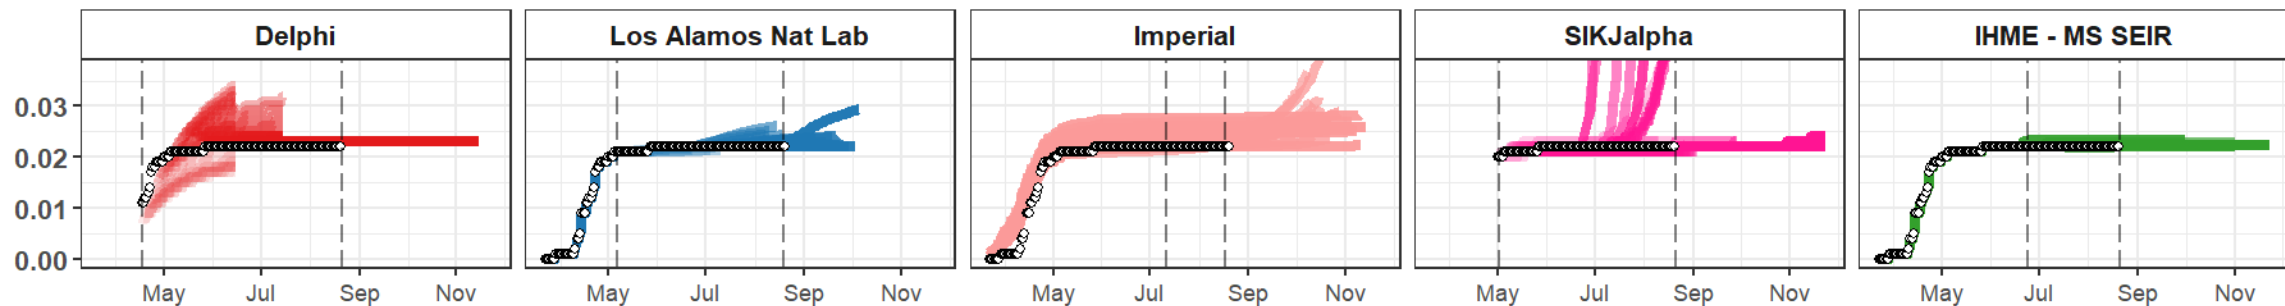

## All Cumulative Errors

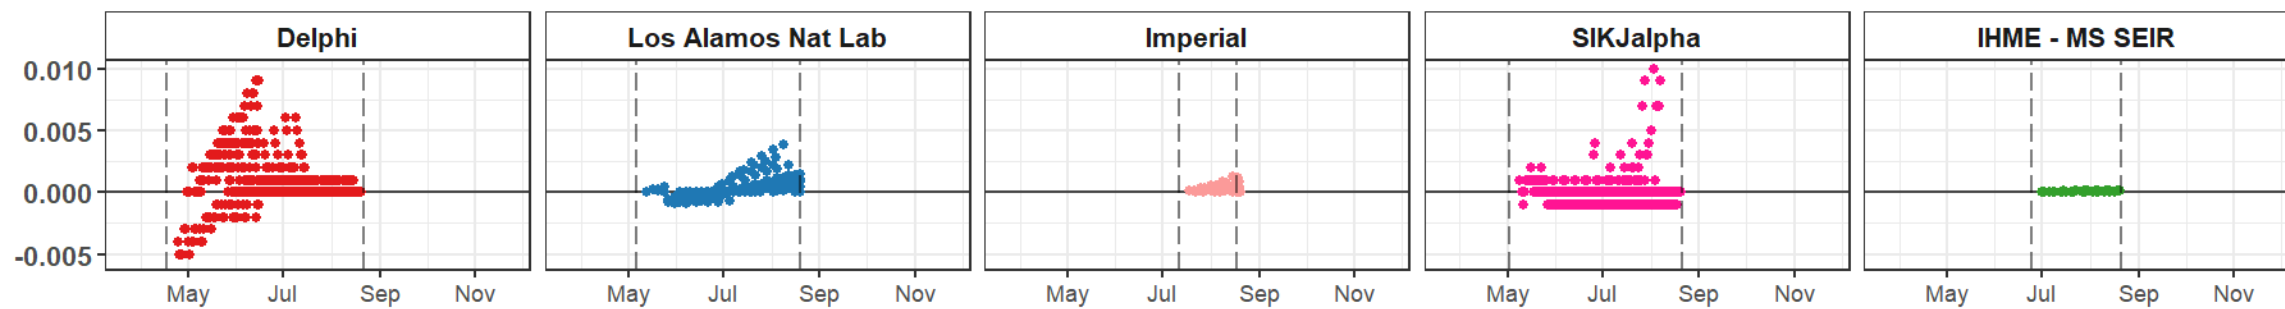

# Tanzania

## Current Forecast

Delphi Los Alamos Nat Lab Imperial SIKJalpha

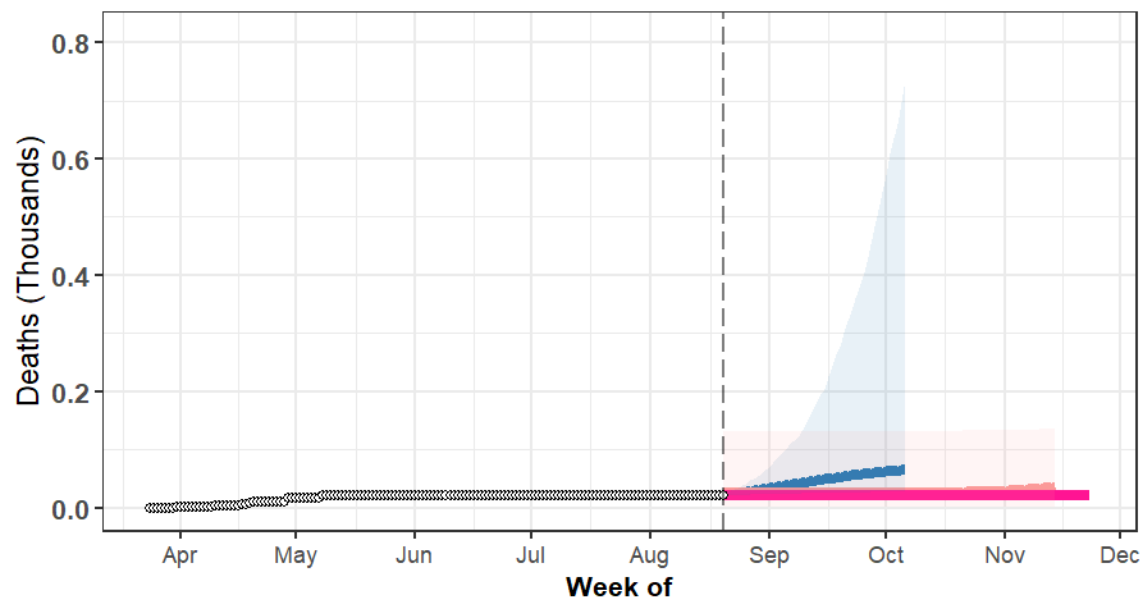

## Cumulative Out-Of-Sample Error (Post Intercept Shift)

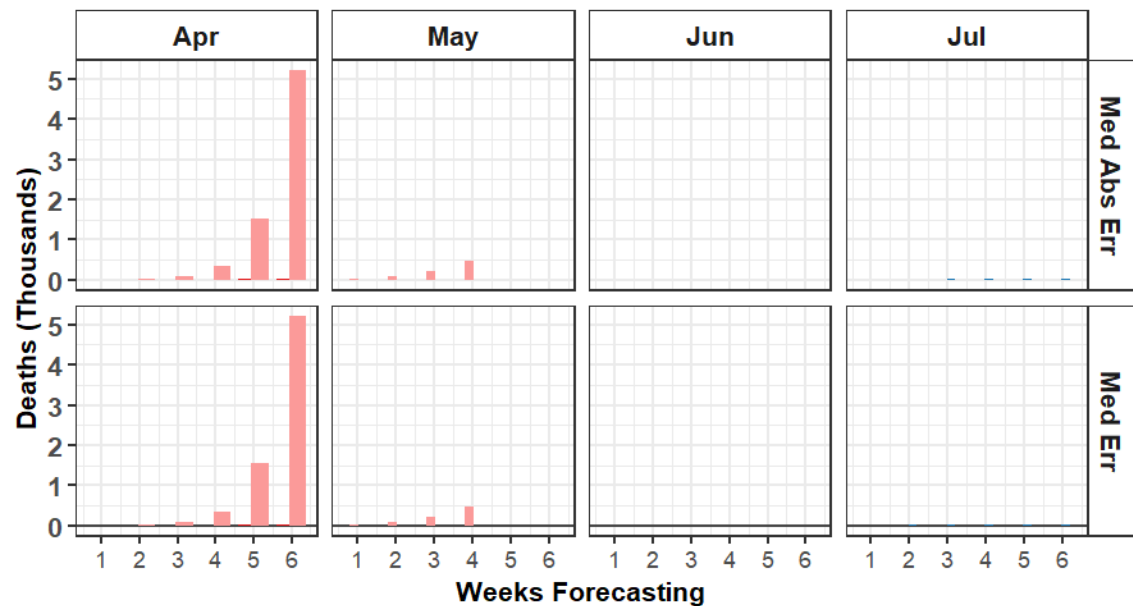

## All Model Versions

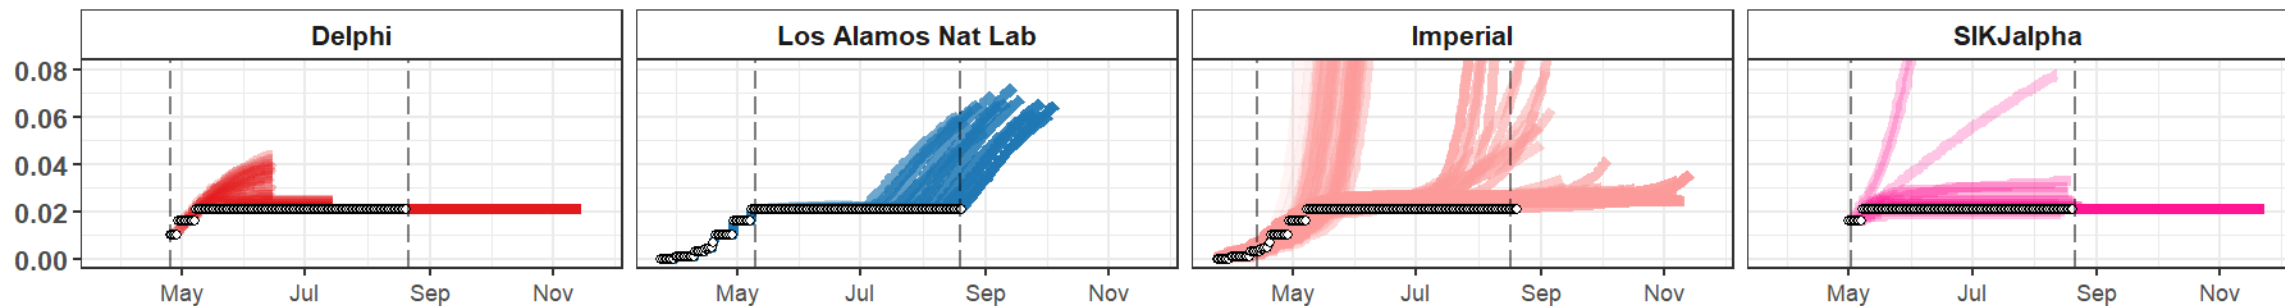

## All Cumulative Errors

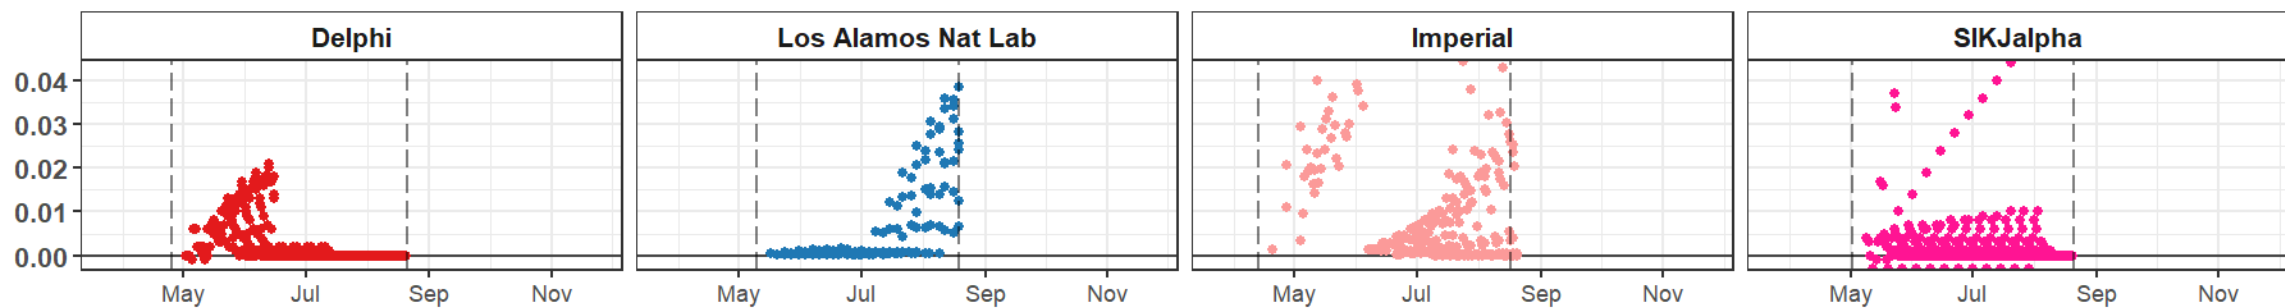

# Cyprus

## Current Forecast

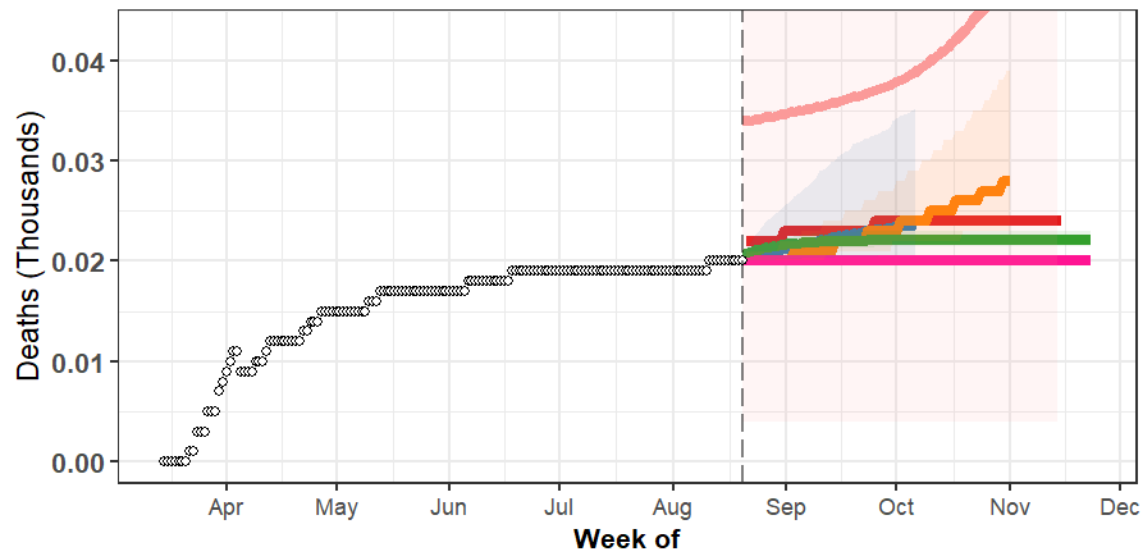

## Cumulative Out-Of-Sample Error (Post Intercept Shift)

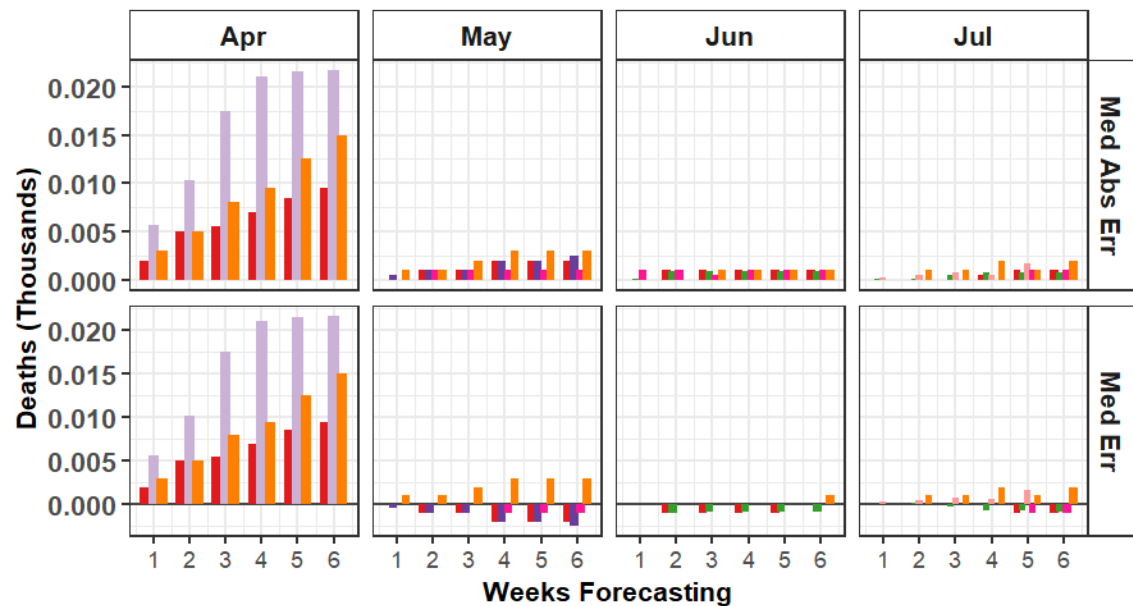

## All Model Versions

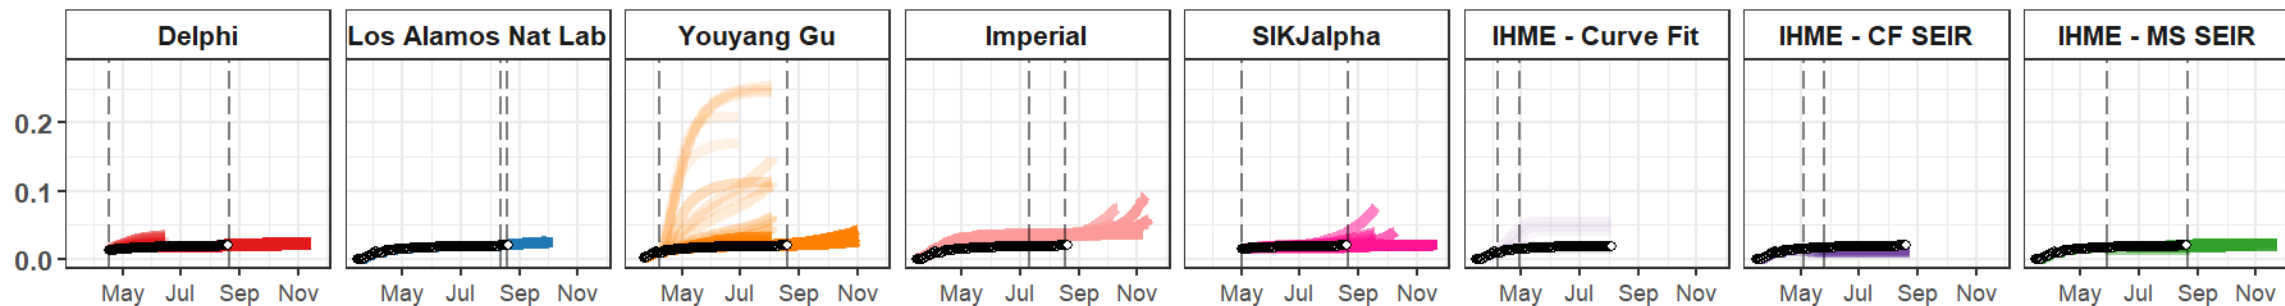

## All Cumulative Errors

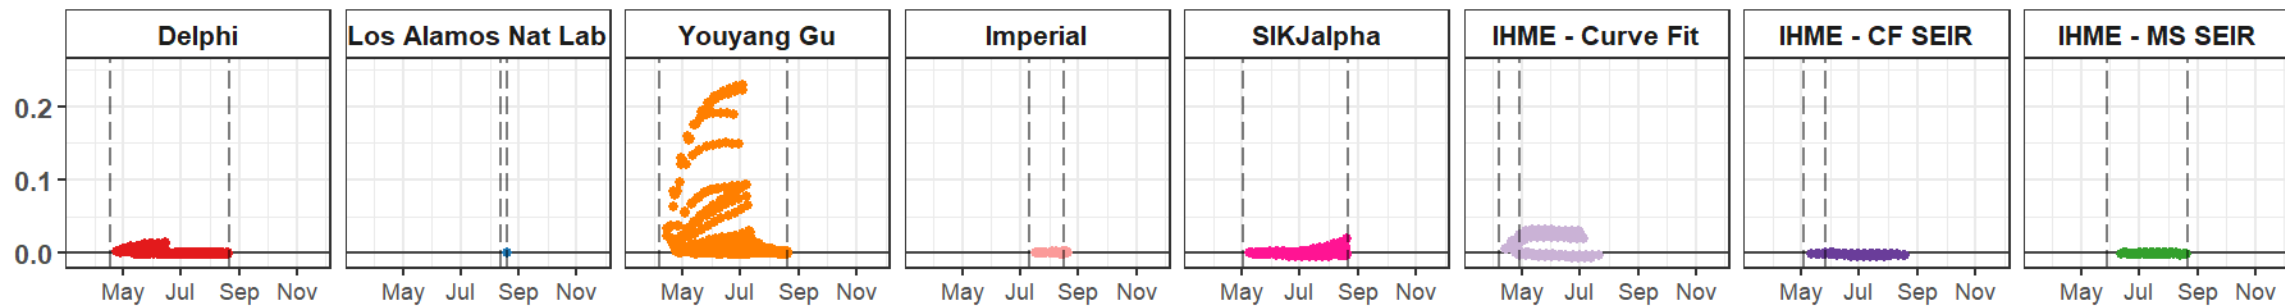



# Mozambique

## Current Forecast

Delphi Imperial SIKJalpha IHME - MS SEIR

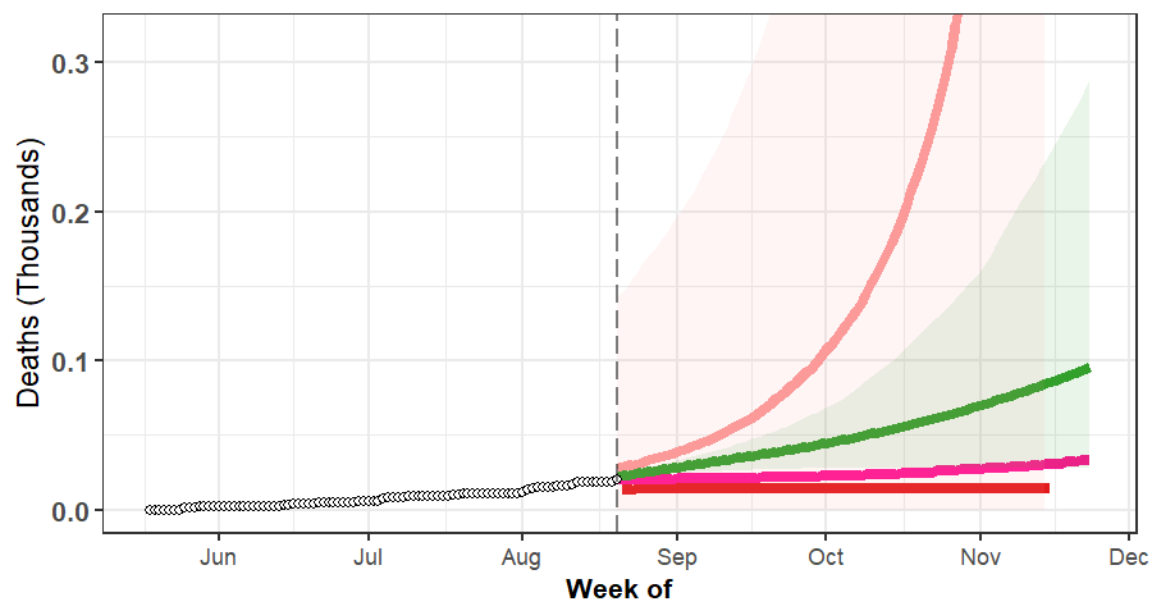

## Cumulative Out-Of-Sample Error (Post Intercept Shift)

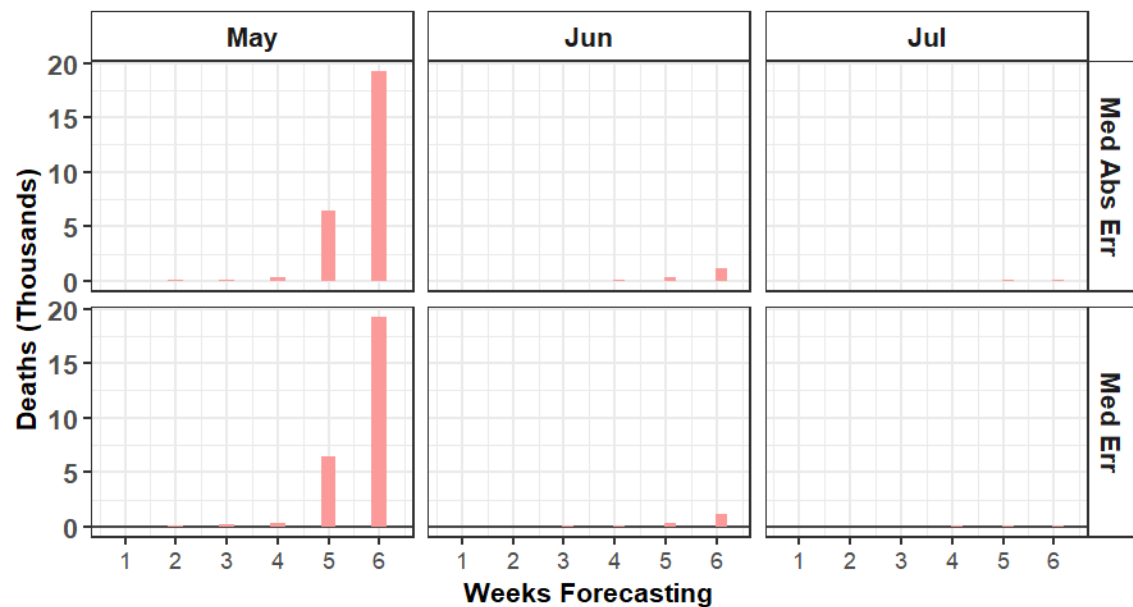

## All Model Versions

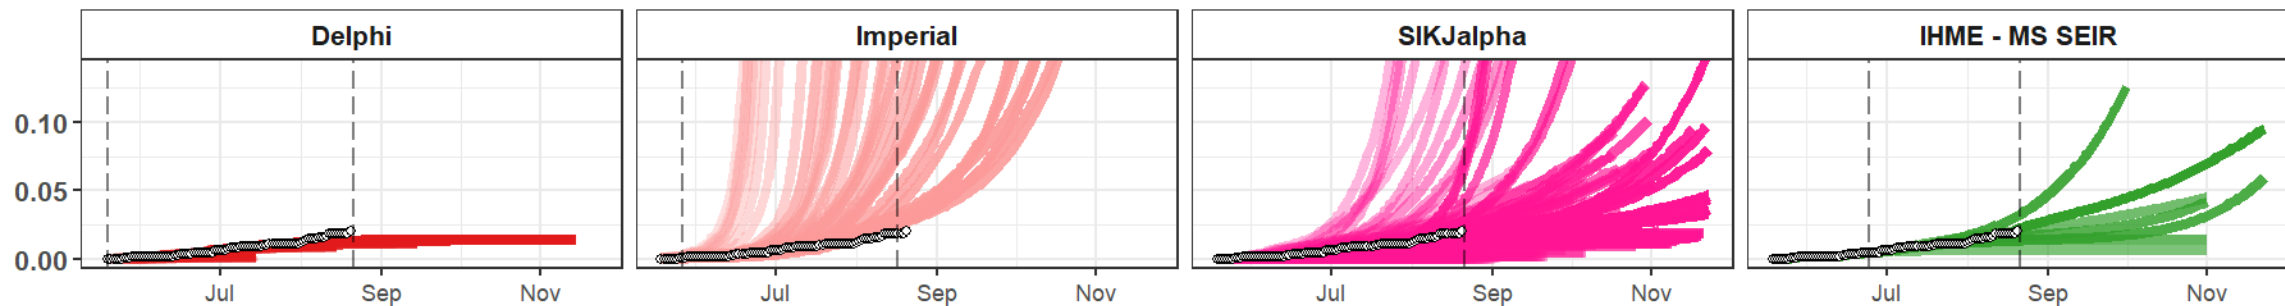

## All Cumulative Errors

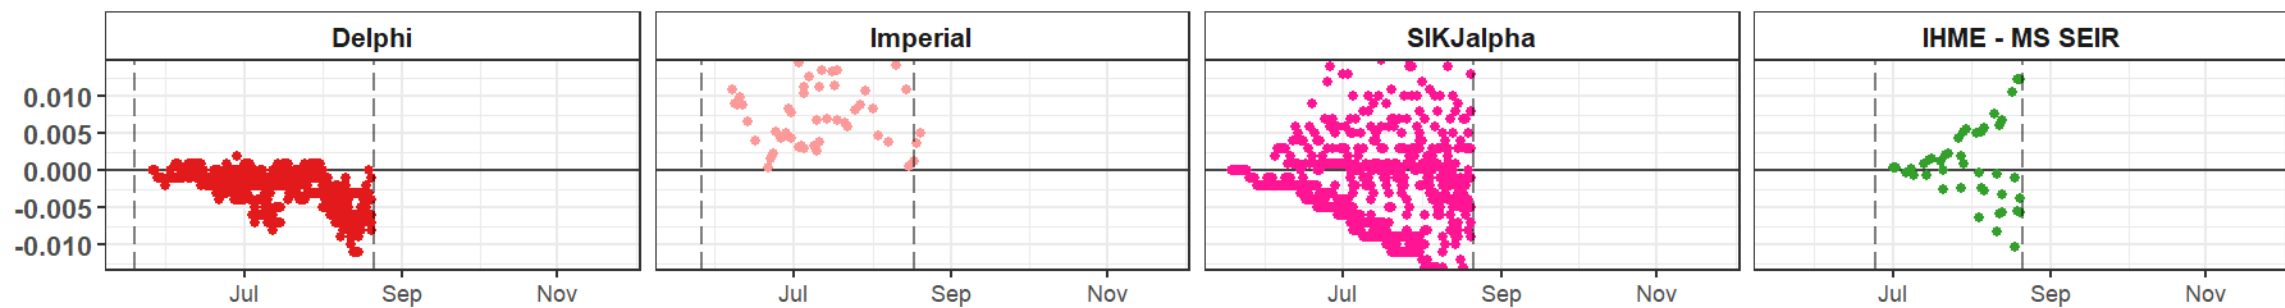

# Uganda

## Current Forecast

Delphi Imperial SIKJalpha

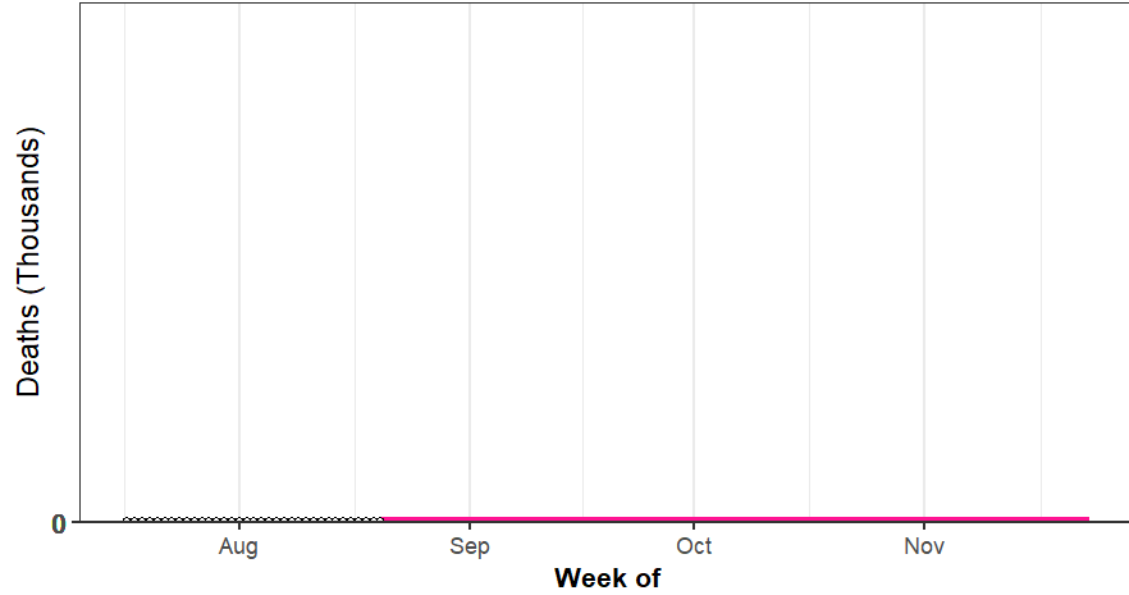

## Cumulative Out-Of-Sample Error (Post Intercept Shift)

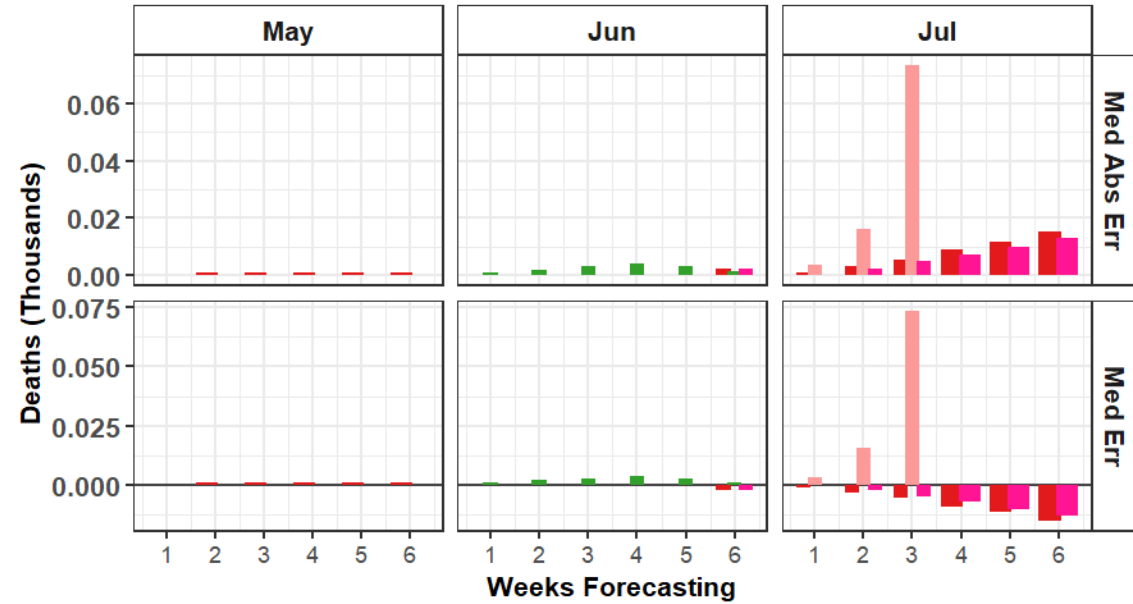

## All Model Versions

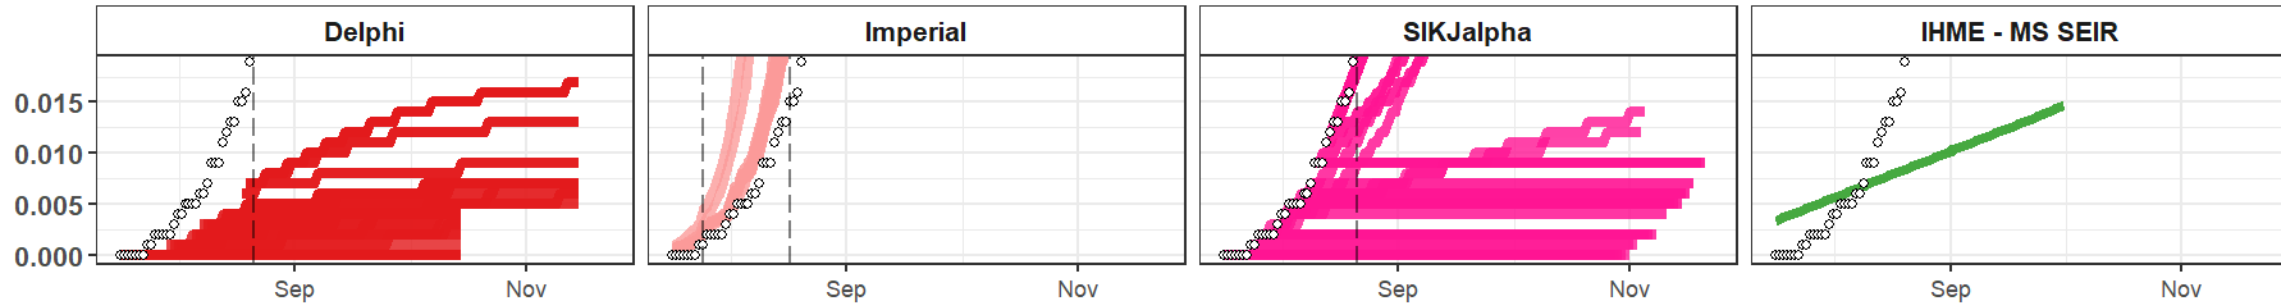

## All Cumulative Errors

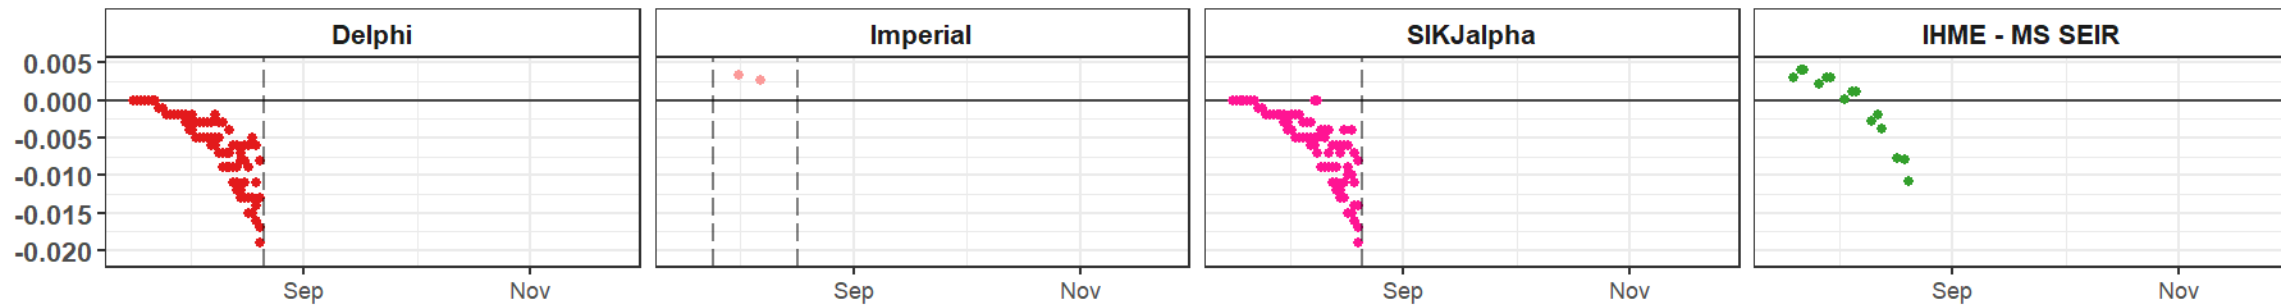

# Georgia (Country)

## Current Forecast

Delphi Imperial SIKJalpha IHME - MS SEIR

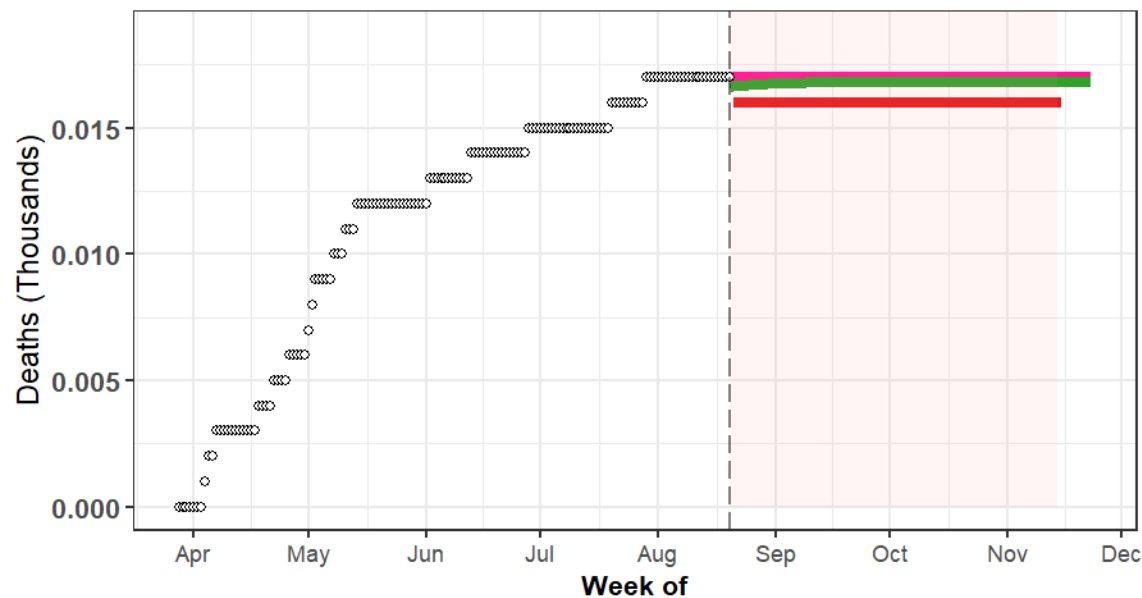

## Cumulative Out-Of-Sample Error (Post Intercept Shift)

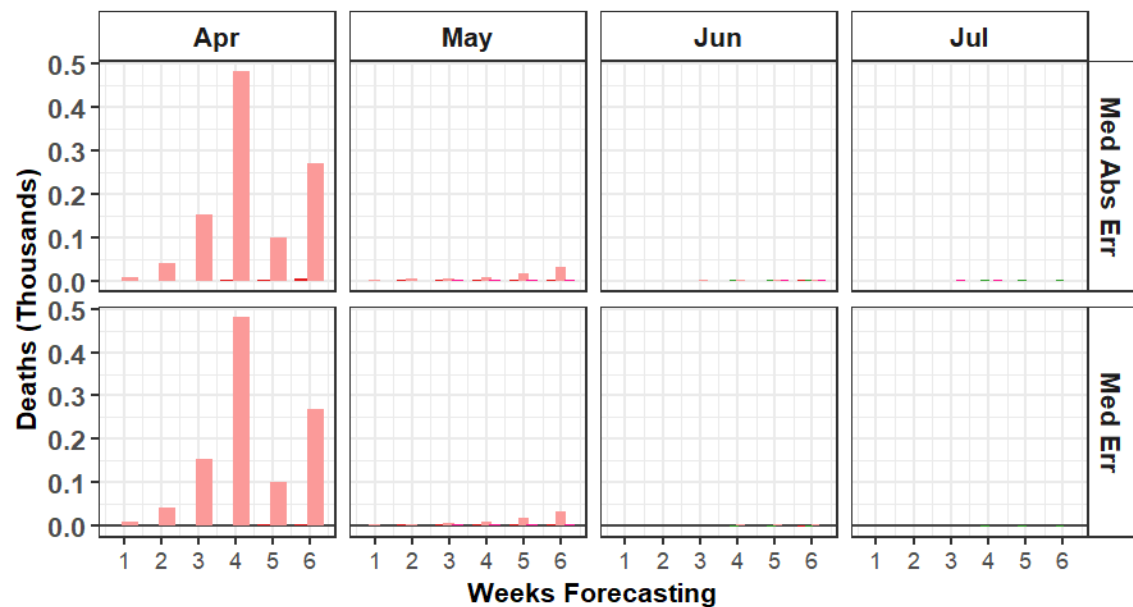

## All Model Versions

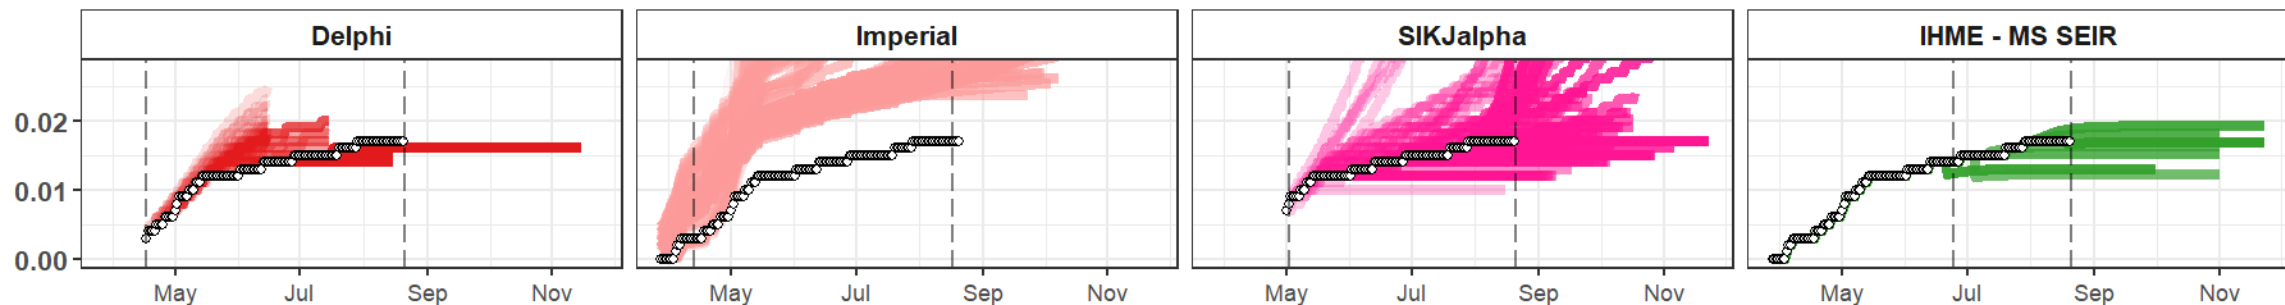

## All Cumulative Errors

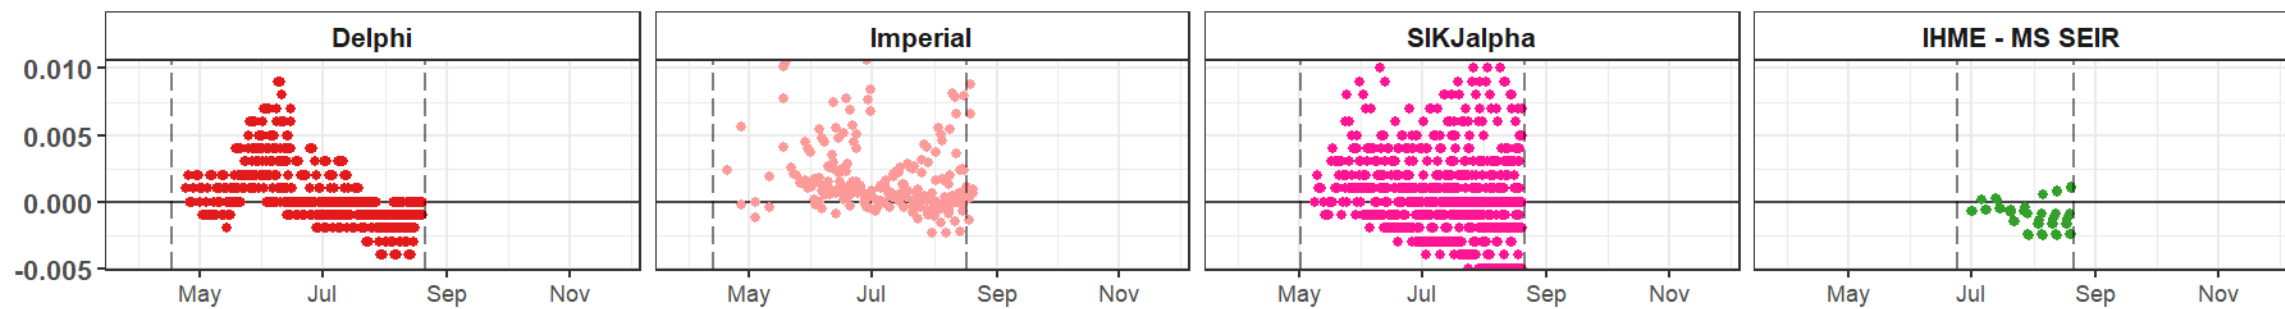

# Jamaica

## Current Forecast

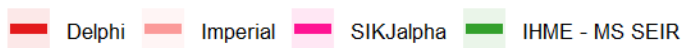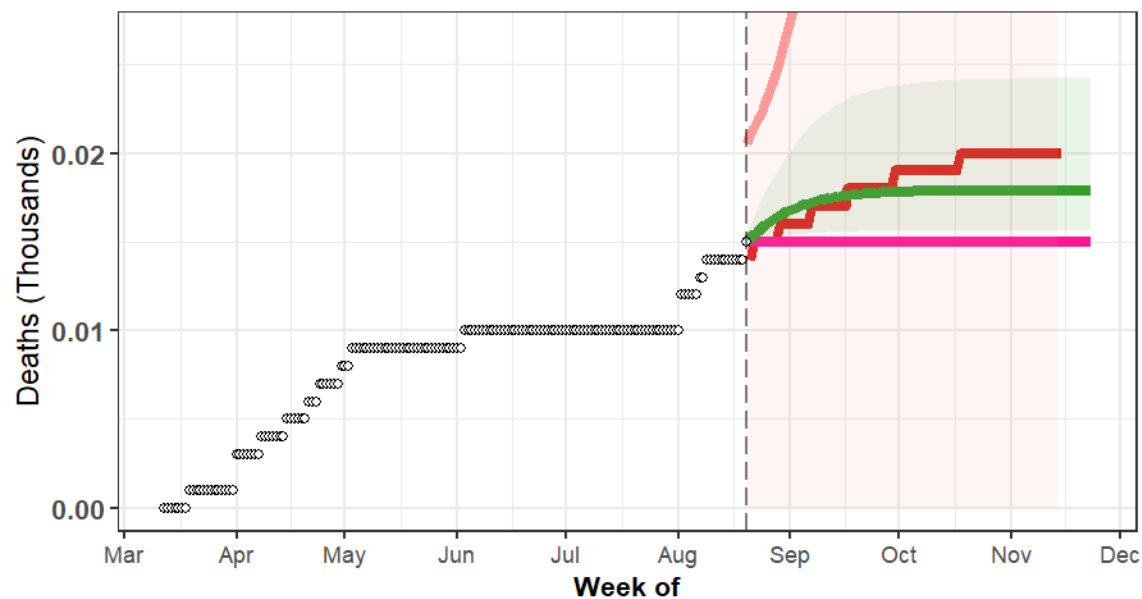

## Cumulative Out-Of-Sample Error (Post Intercept Shift)

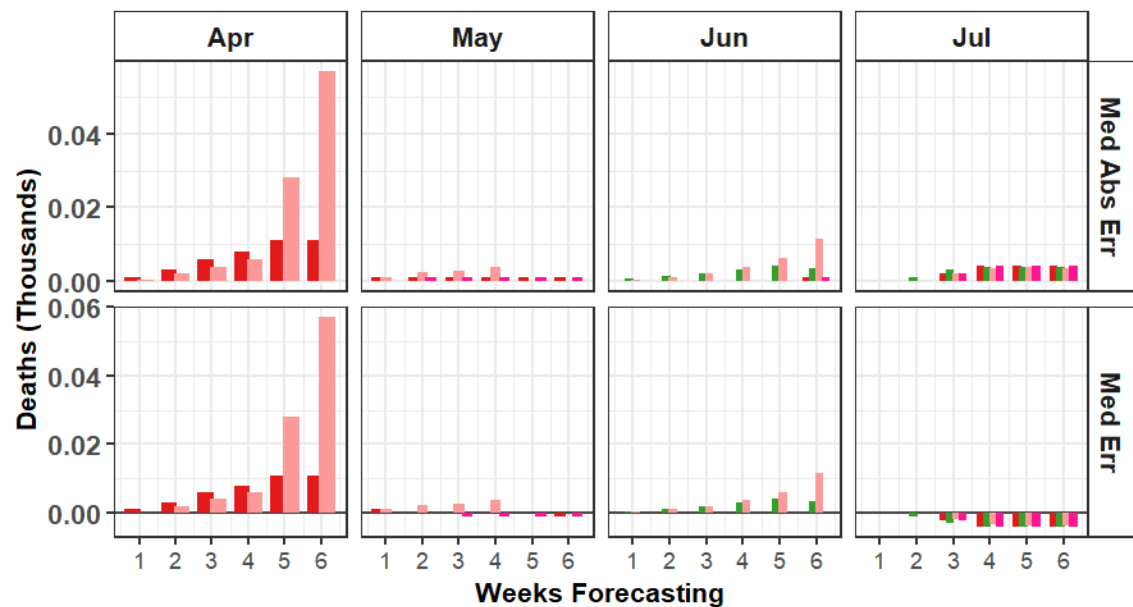

## All Model Versions

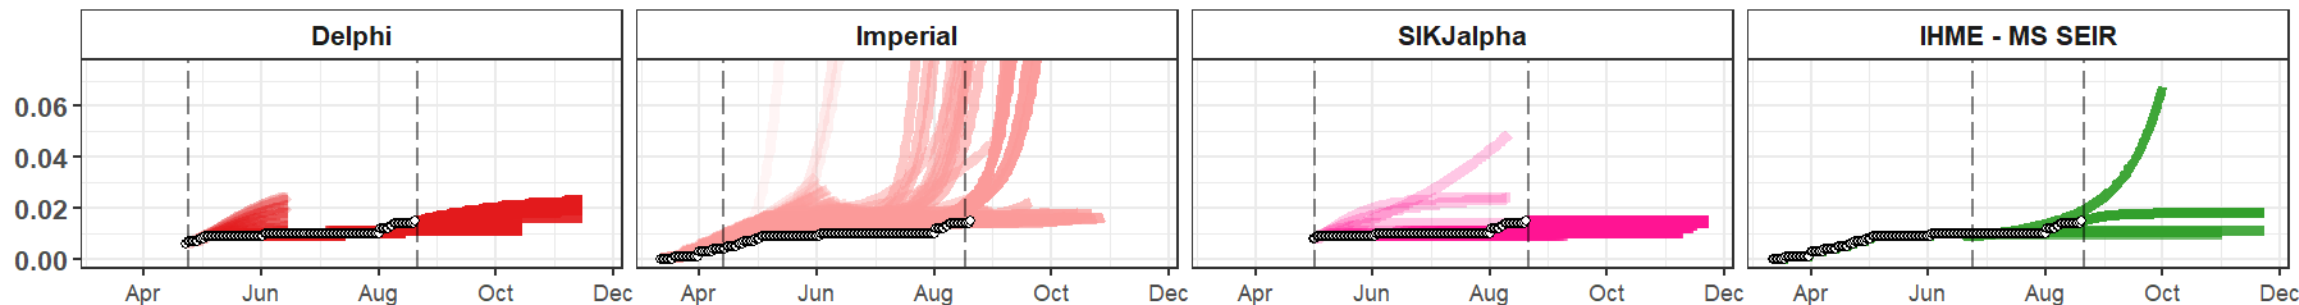

## All Cumulative Errors

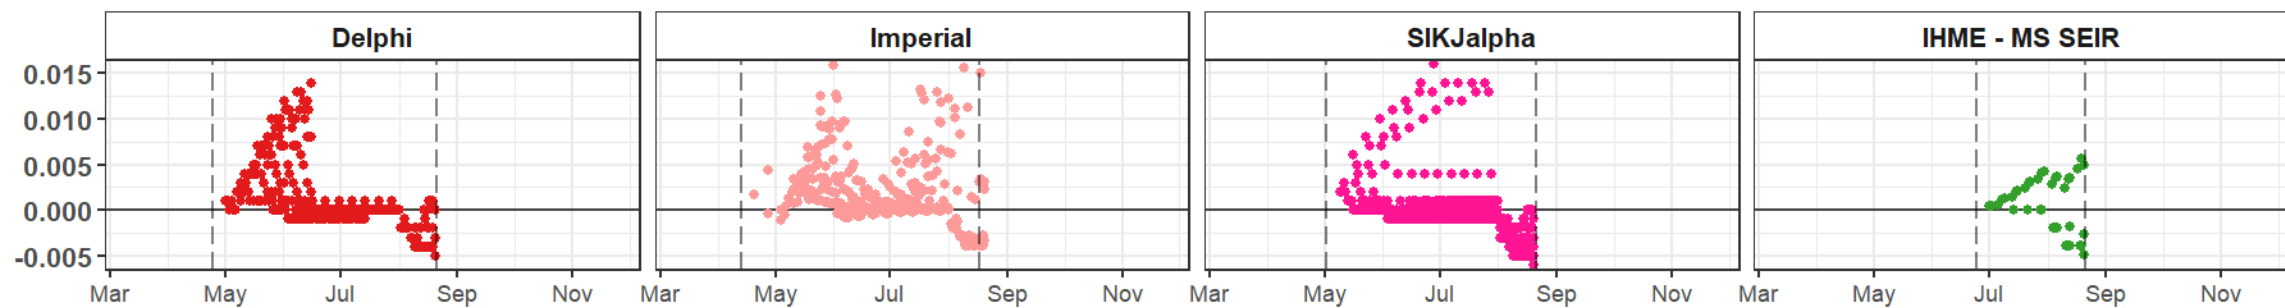

# Sao Tome and Principe

## Current Forecast

Delphi Imperial SIKJalpha IHME - MS SEIR

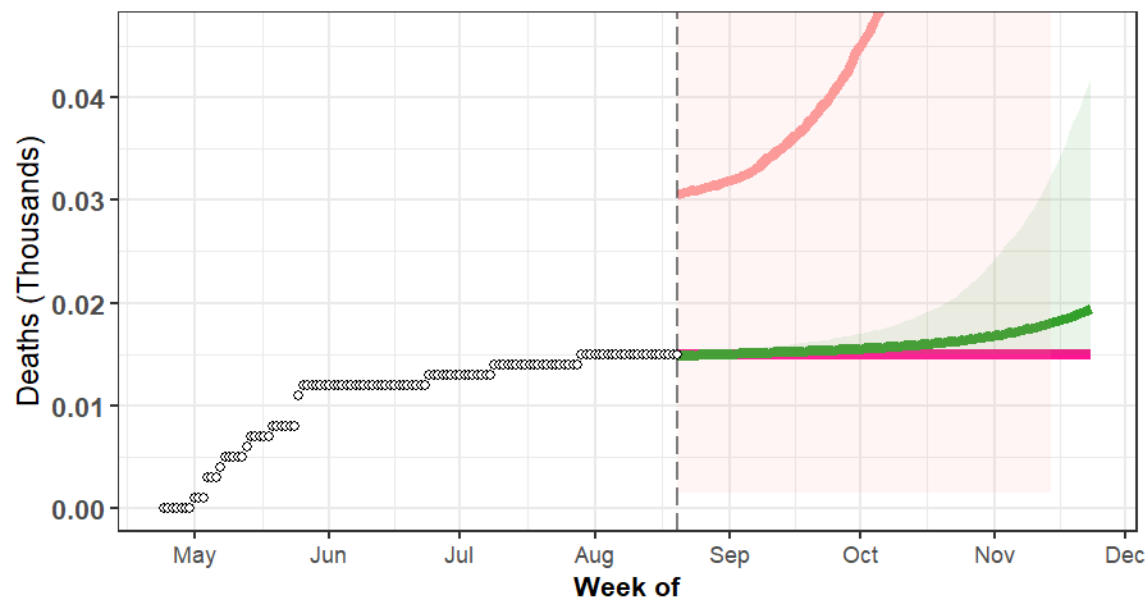

## Cumulative Out-Of-Sample Error (Post Intercept Shift)

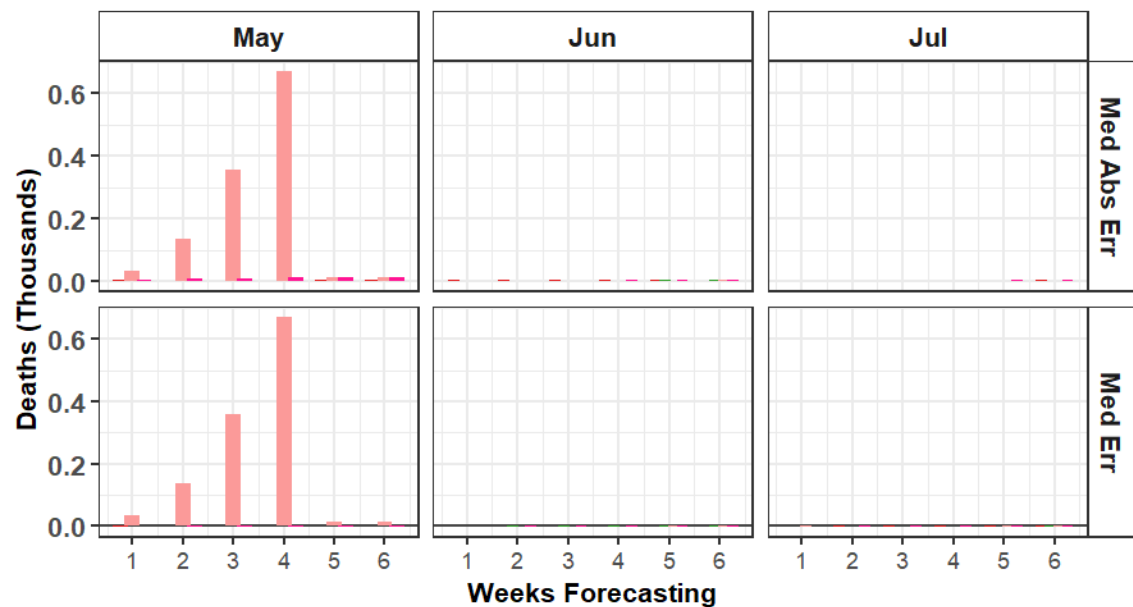

## All Model Versions

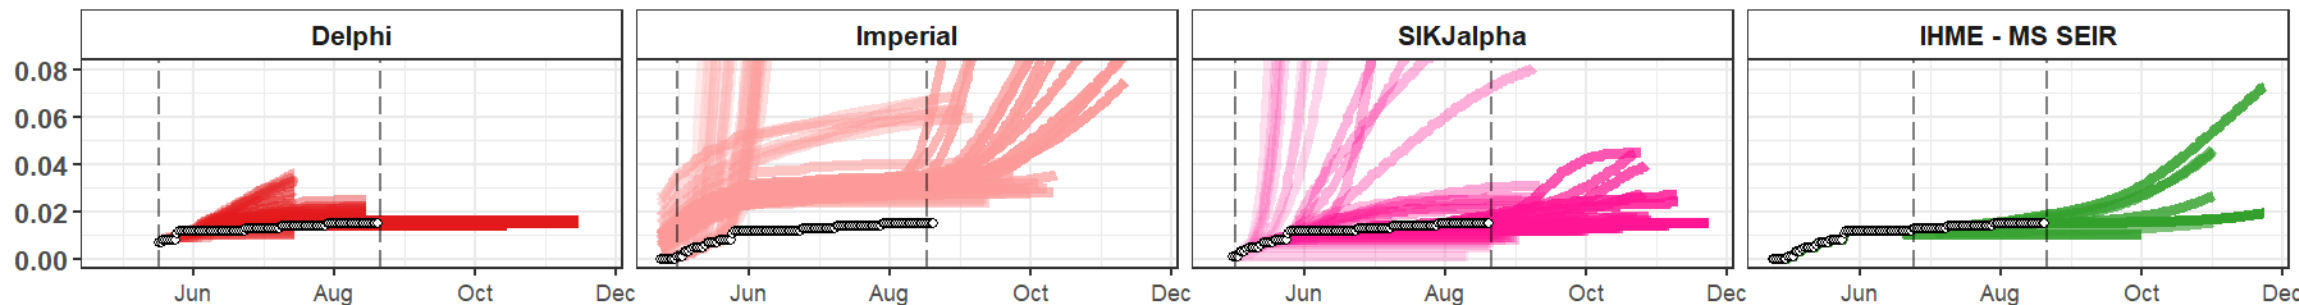

## All Cumulative Errors

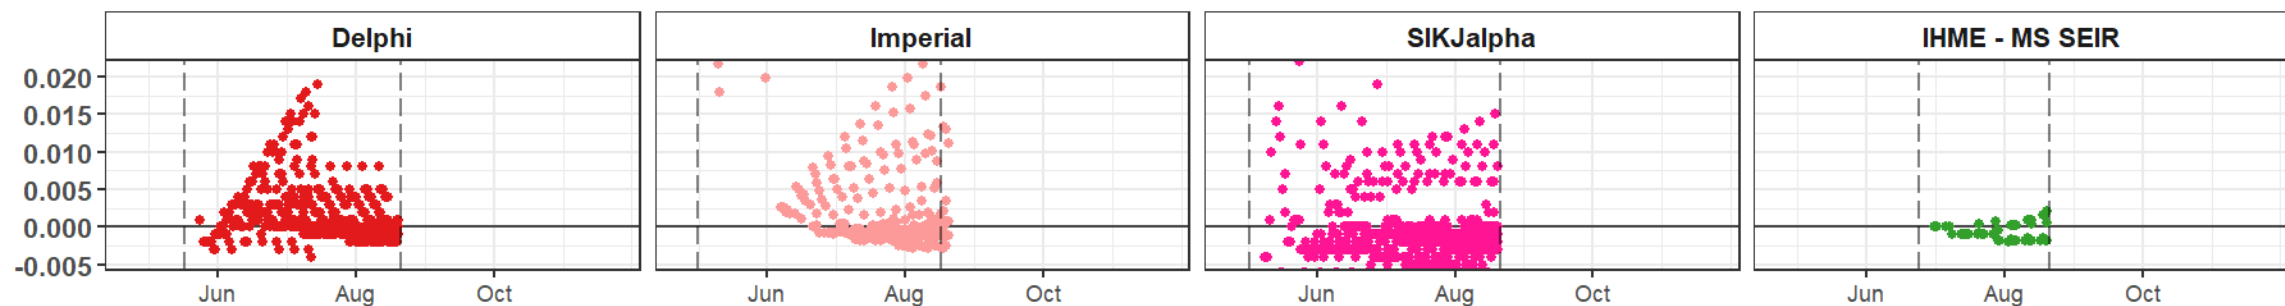

# Trinidad and Tobago

## Current Forecast

Delphi Imperial SIKJalpha IHME - MS SEIR

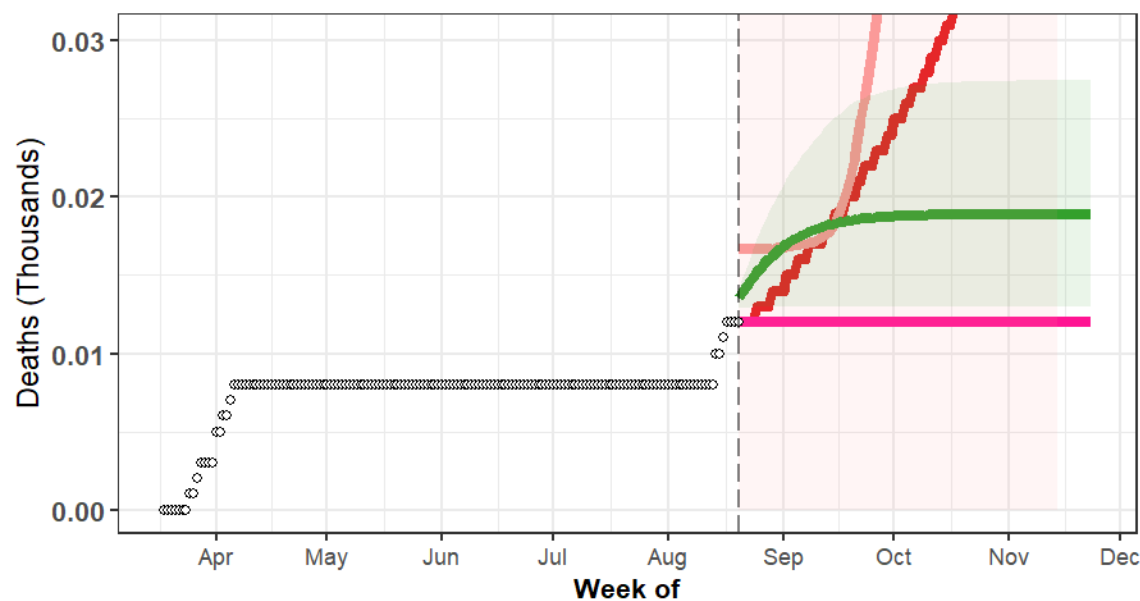

## Cumulative Out-Of-Sample Error (Post Intercept Shift)

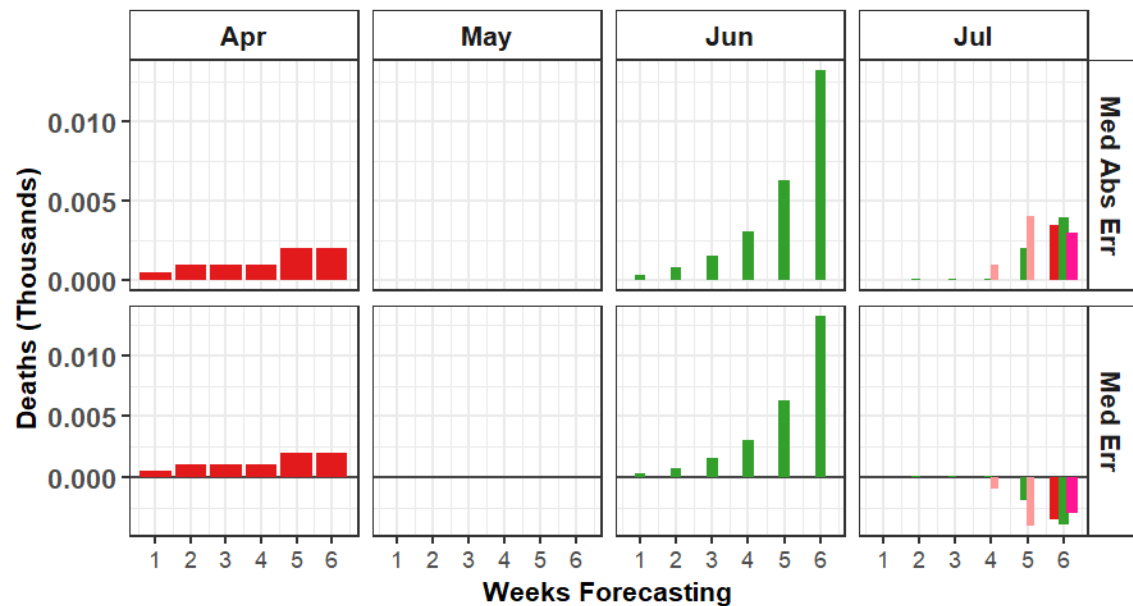

## All Model Versions

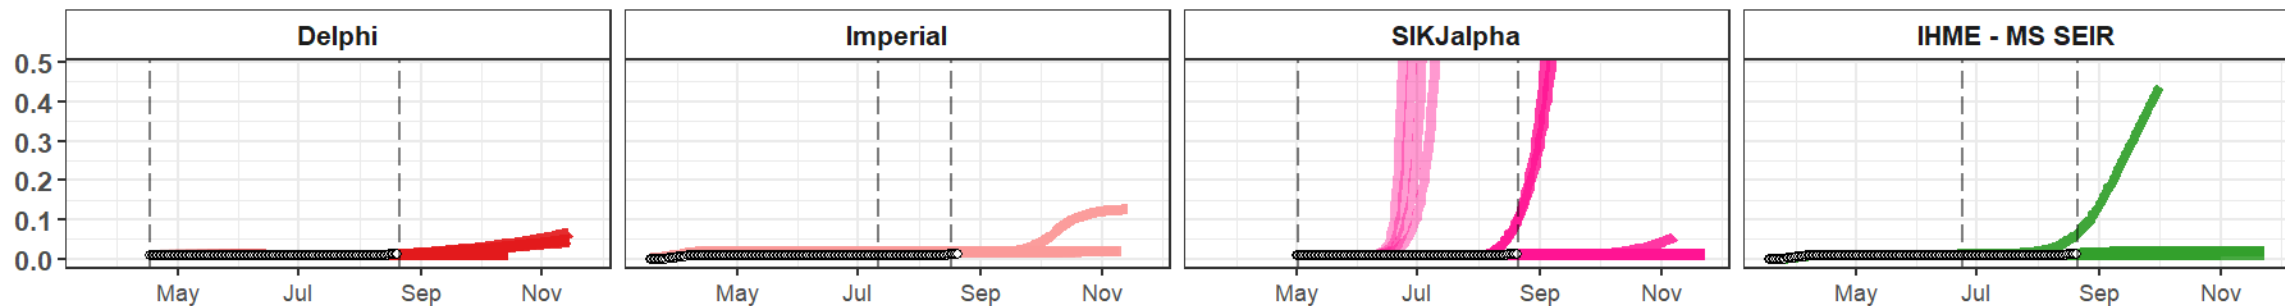

## All Cumulative Errors

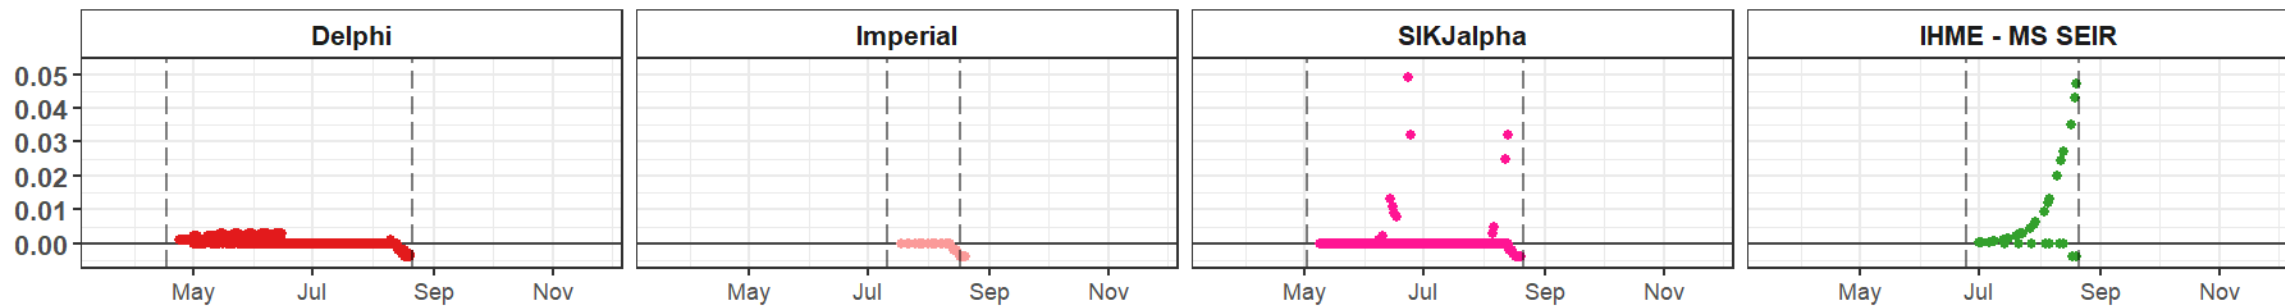

# Jordan

## Current Forecast

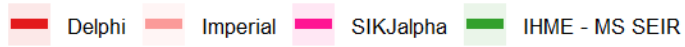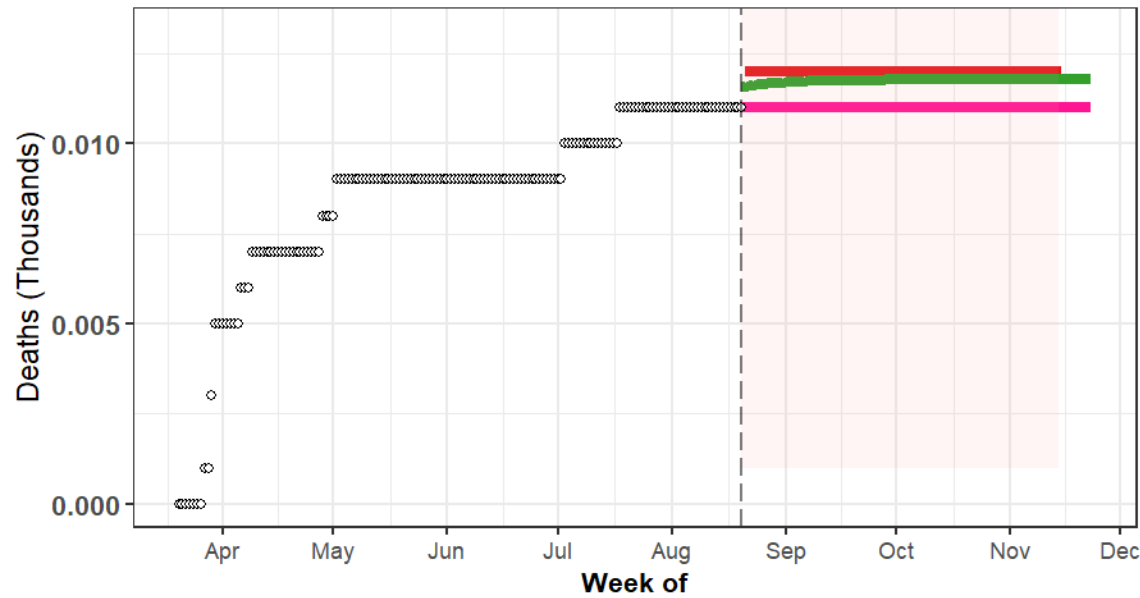

## Cumulative Out-Of-Sample Error (Post Intercept Shift)

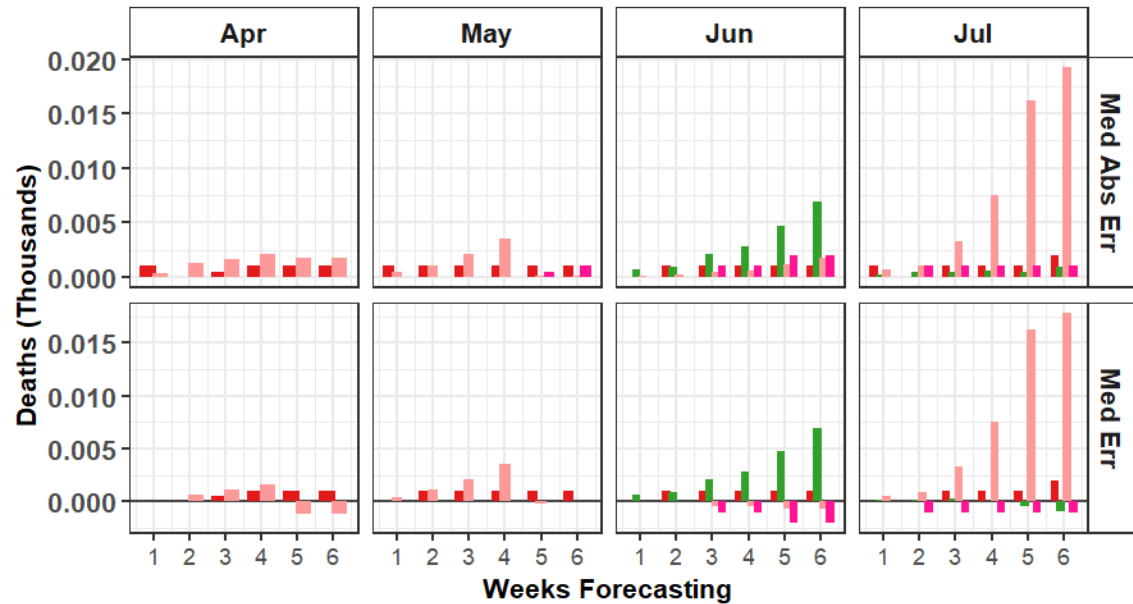

## All Model Versions

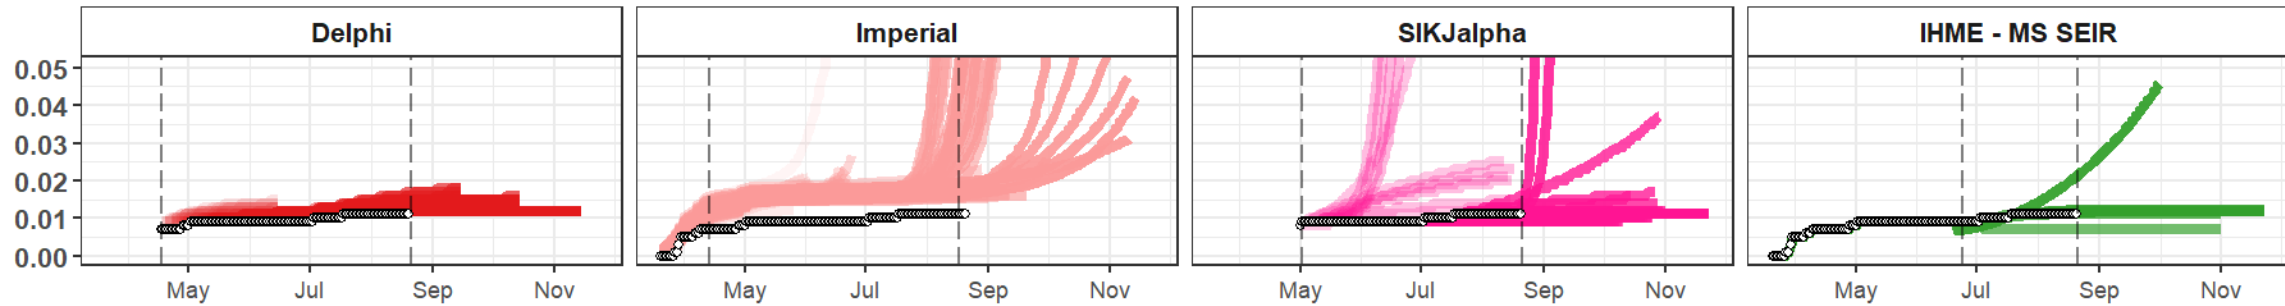

## All Cumulative Errors

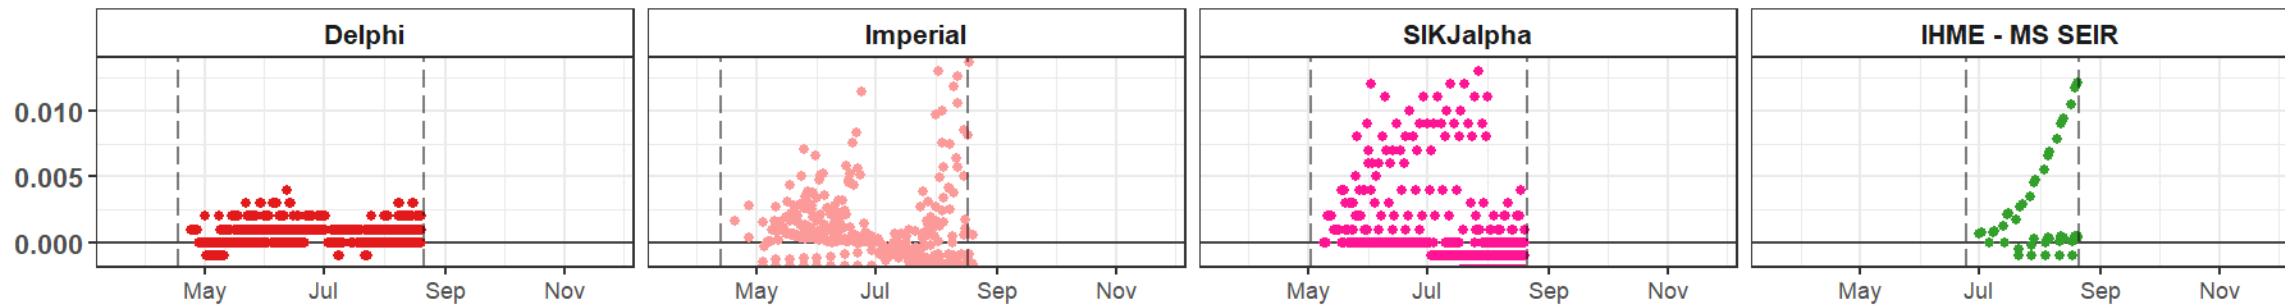

# Rwanda

## Current Forecast

Delphi Imperial SIKJalpha IHME - MS SEIR

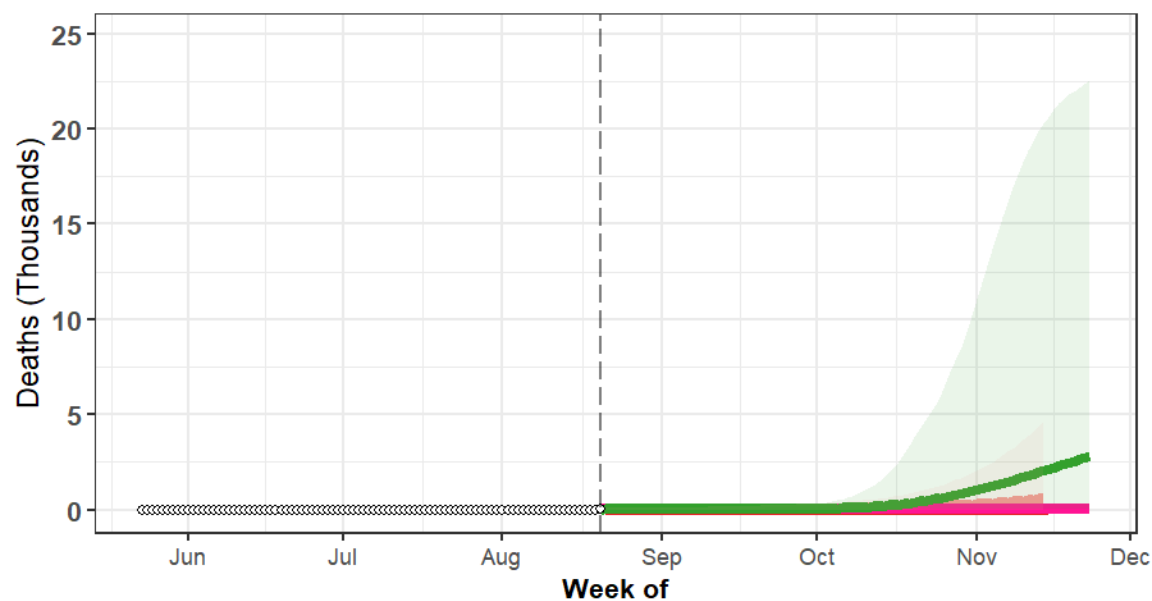

## Cumulative Out-Of-Sample Error (Post Intercept Shift)

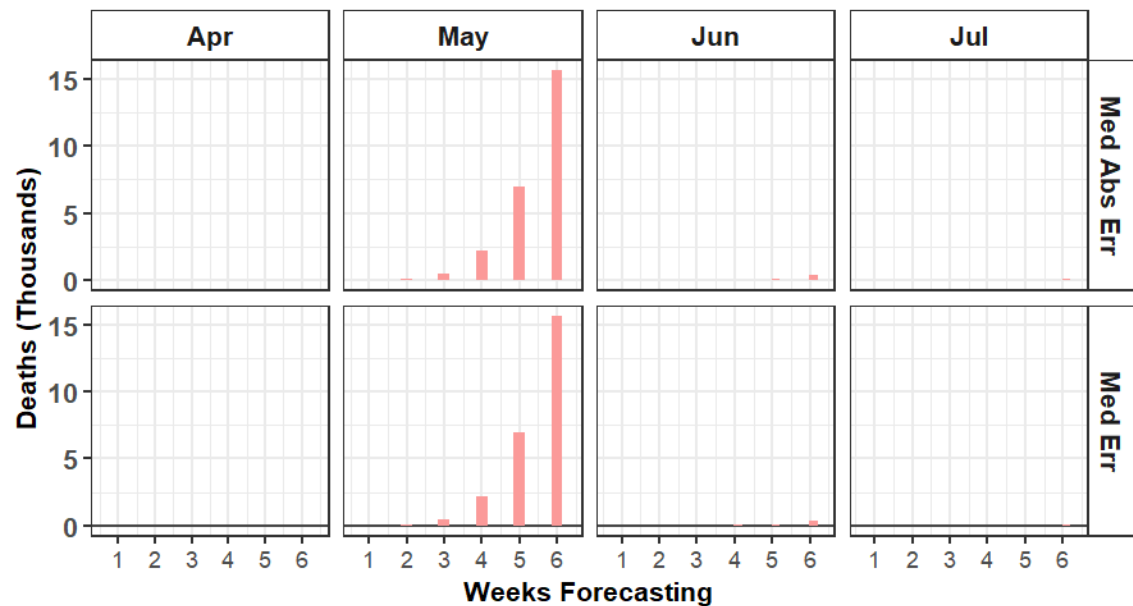

## All Model Versions

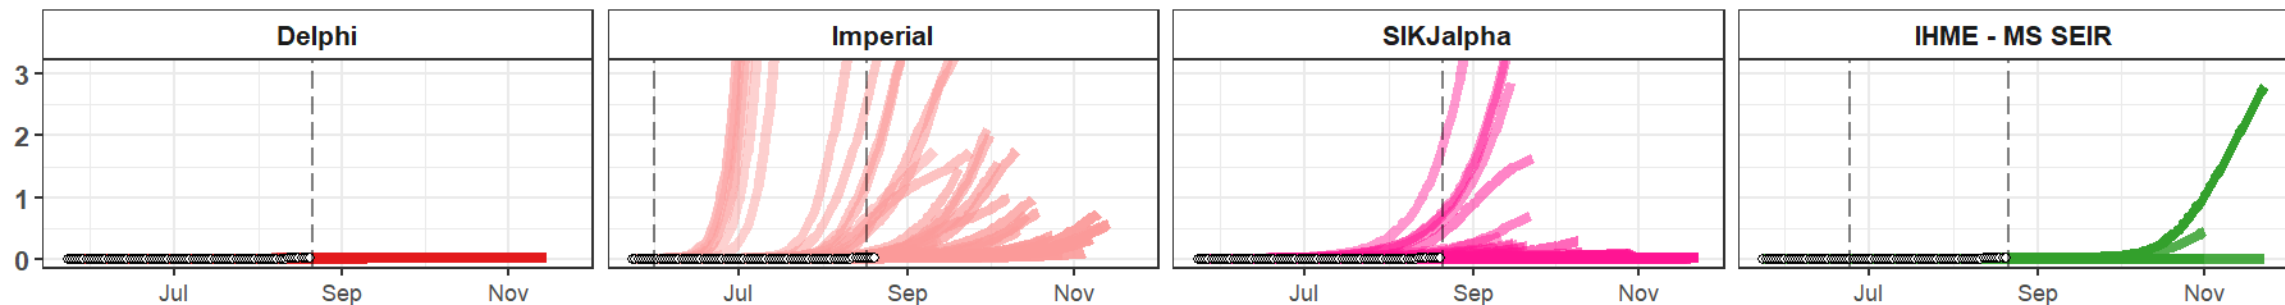

## All Cumulative Errors

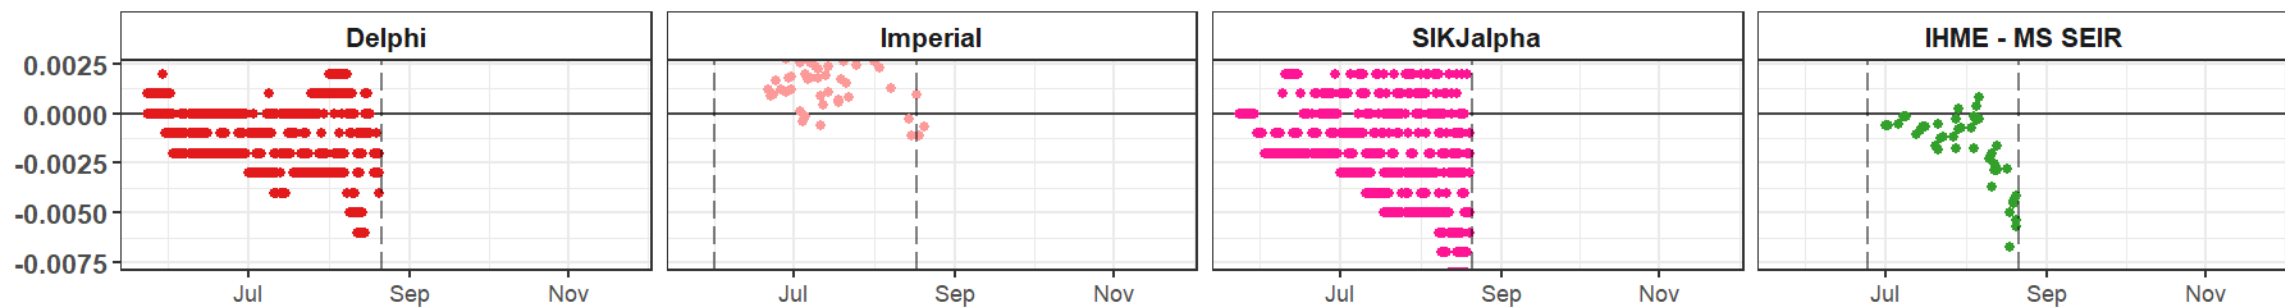



# Sri Lanka

## Current Forecast

Delphi Imperial SIKJalpha IHME - MS SEIR

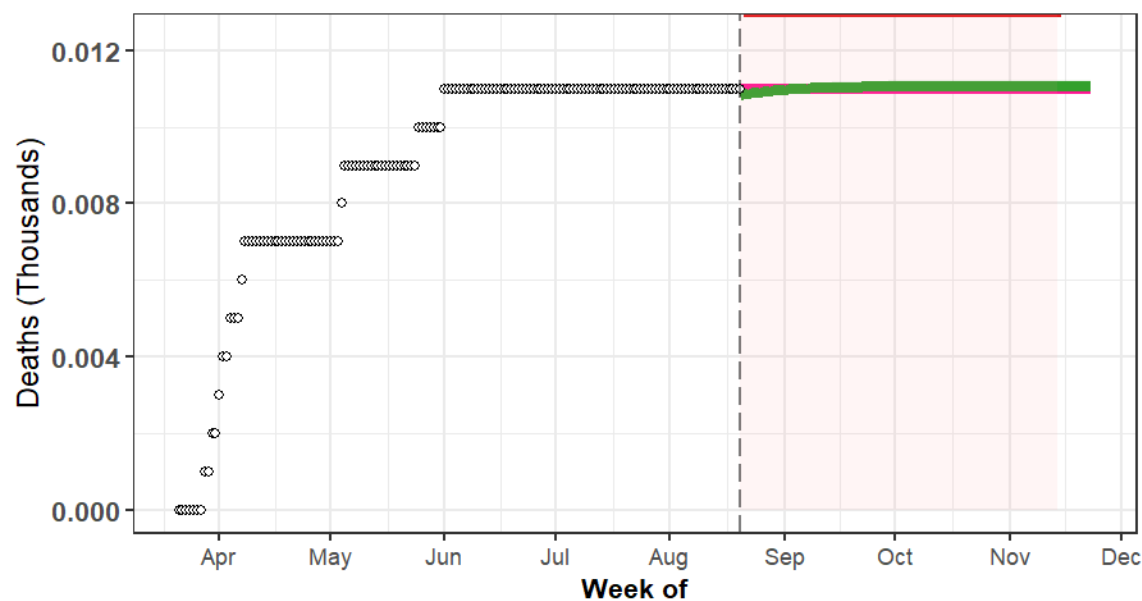

## Cumulative Out-Of-Sample Error (Post Intercept Shift)

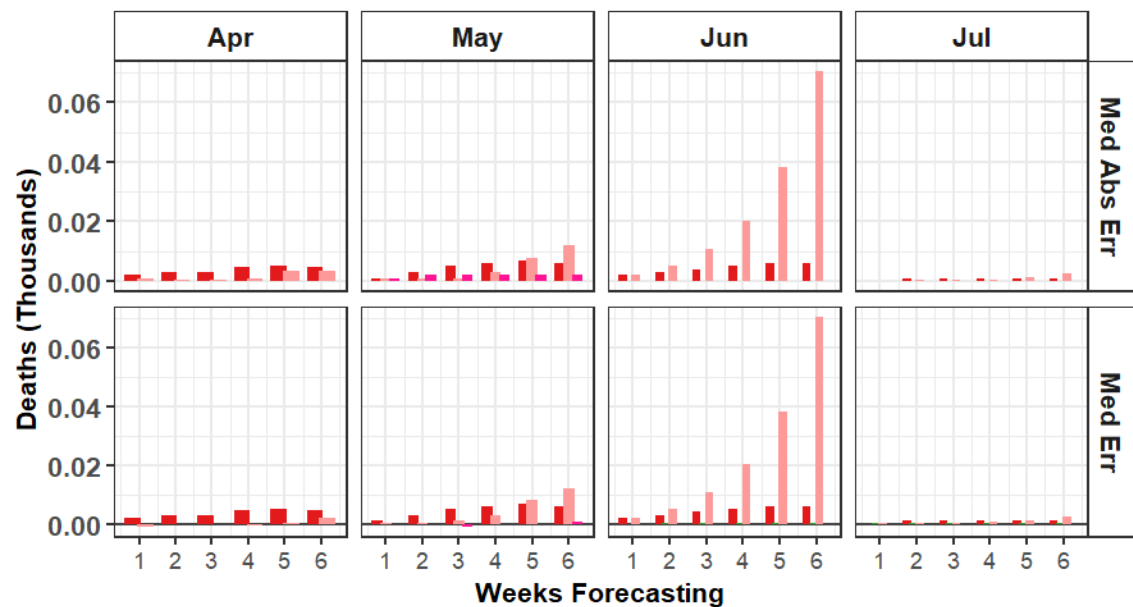

## All Model Versions

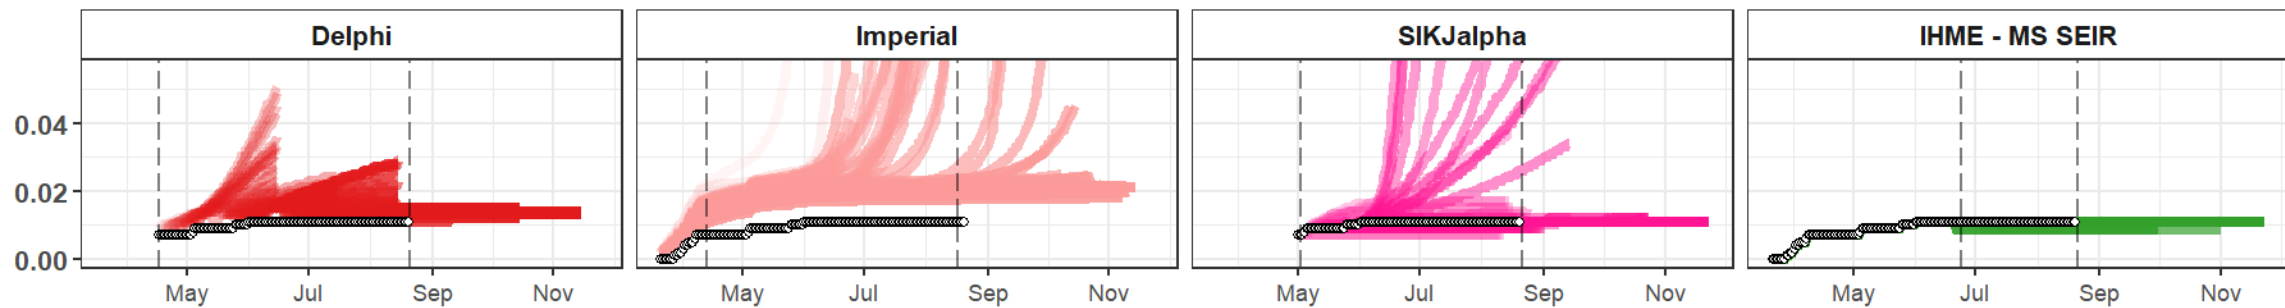

## All Cumulative Errors

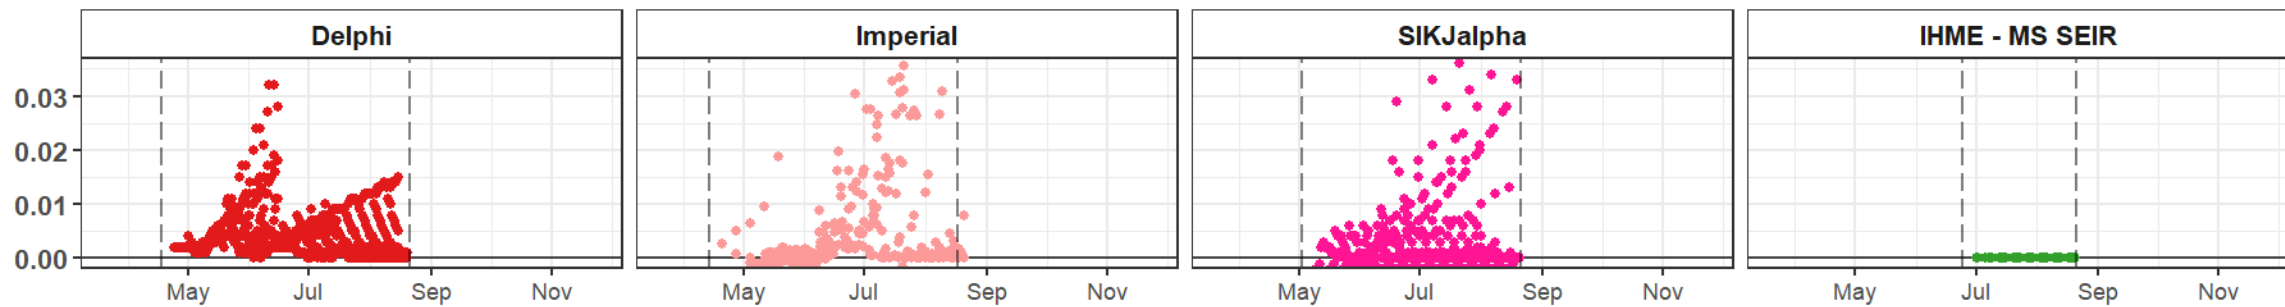

Supplement: Supplementary file [file 2020.07.13.20151233-4.pdf]
