# Supplementary material for: Predictive performance of international COVID-19 mortality forecasting models
Source: bioRxiv or medRxiv preprint supplement (doi:10.1101/2020.07.13.20151233), 2020-11-19
Supplement: Supplementary file [file 2020.07.13.20151233-3.pdf]

3 X 10 Day Rolling Average 7 Day Rolling Average Loess

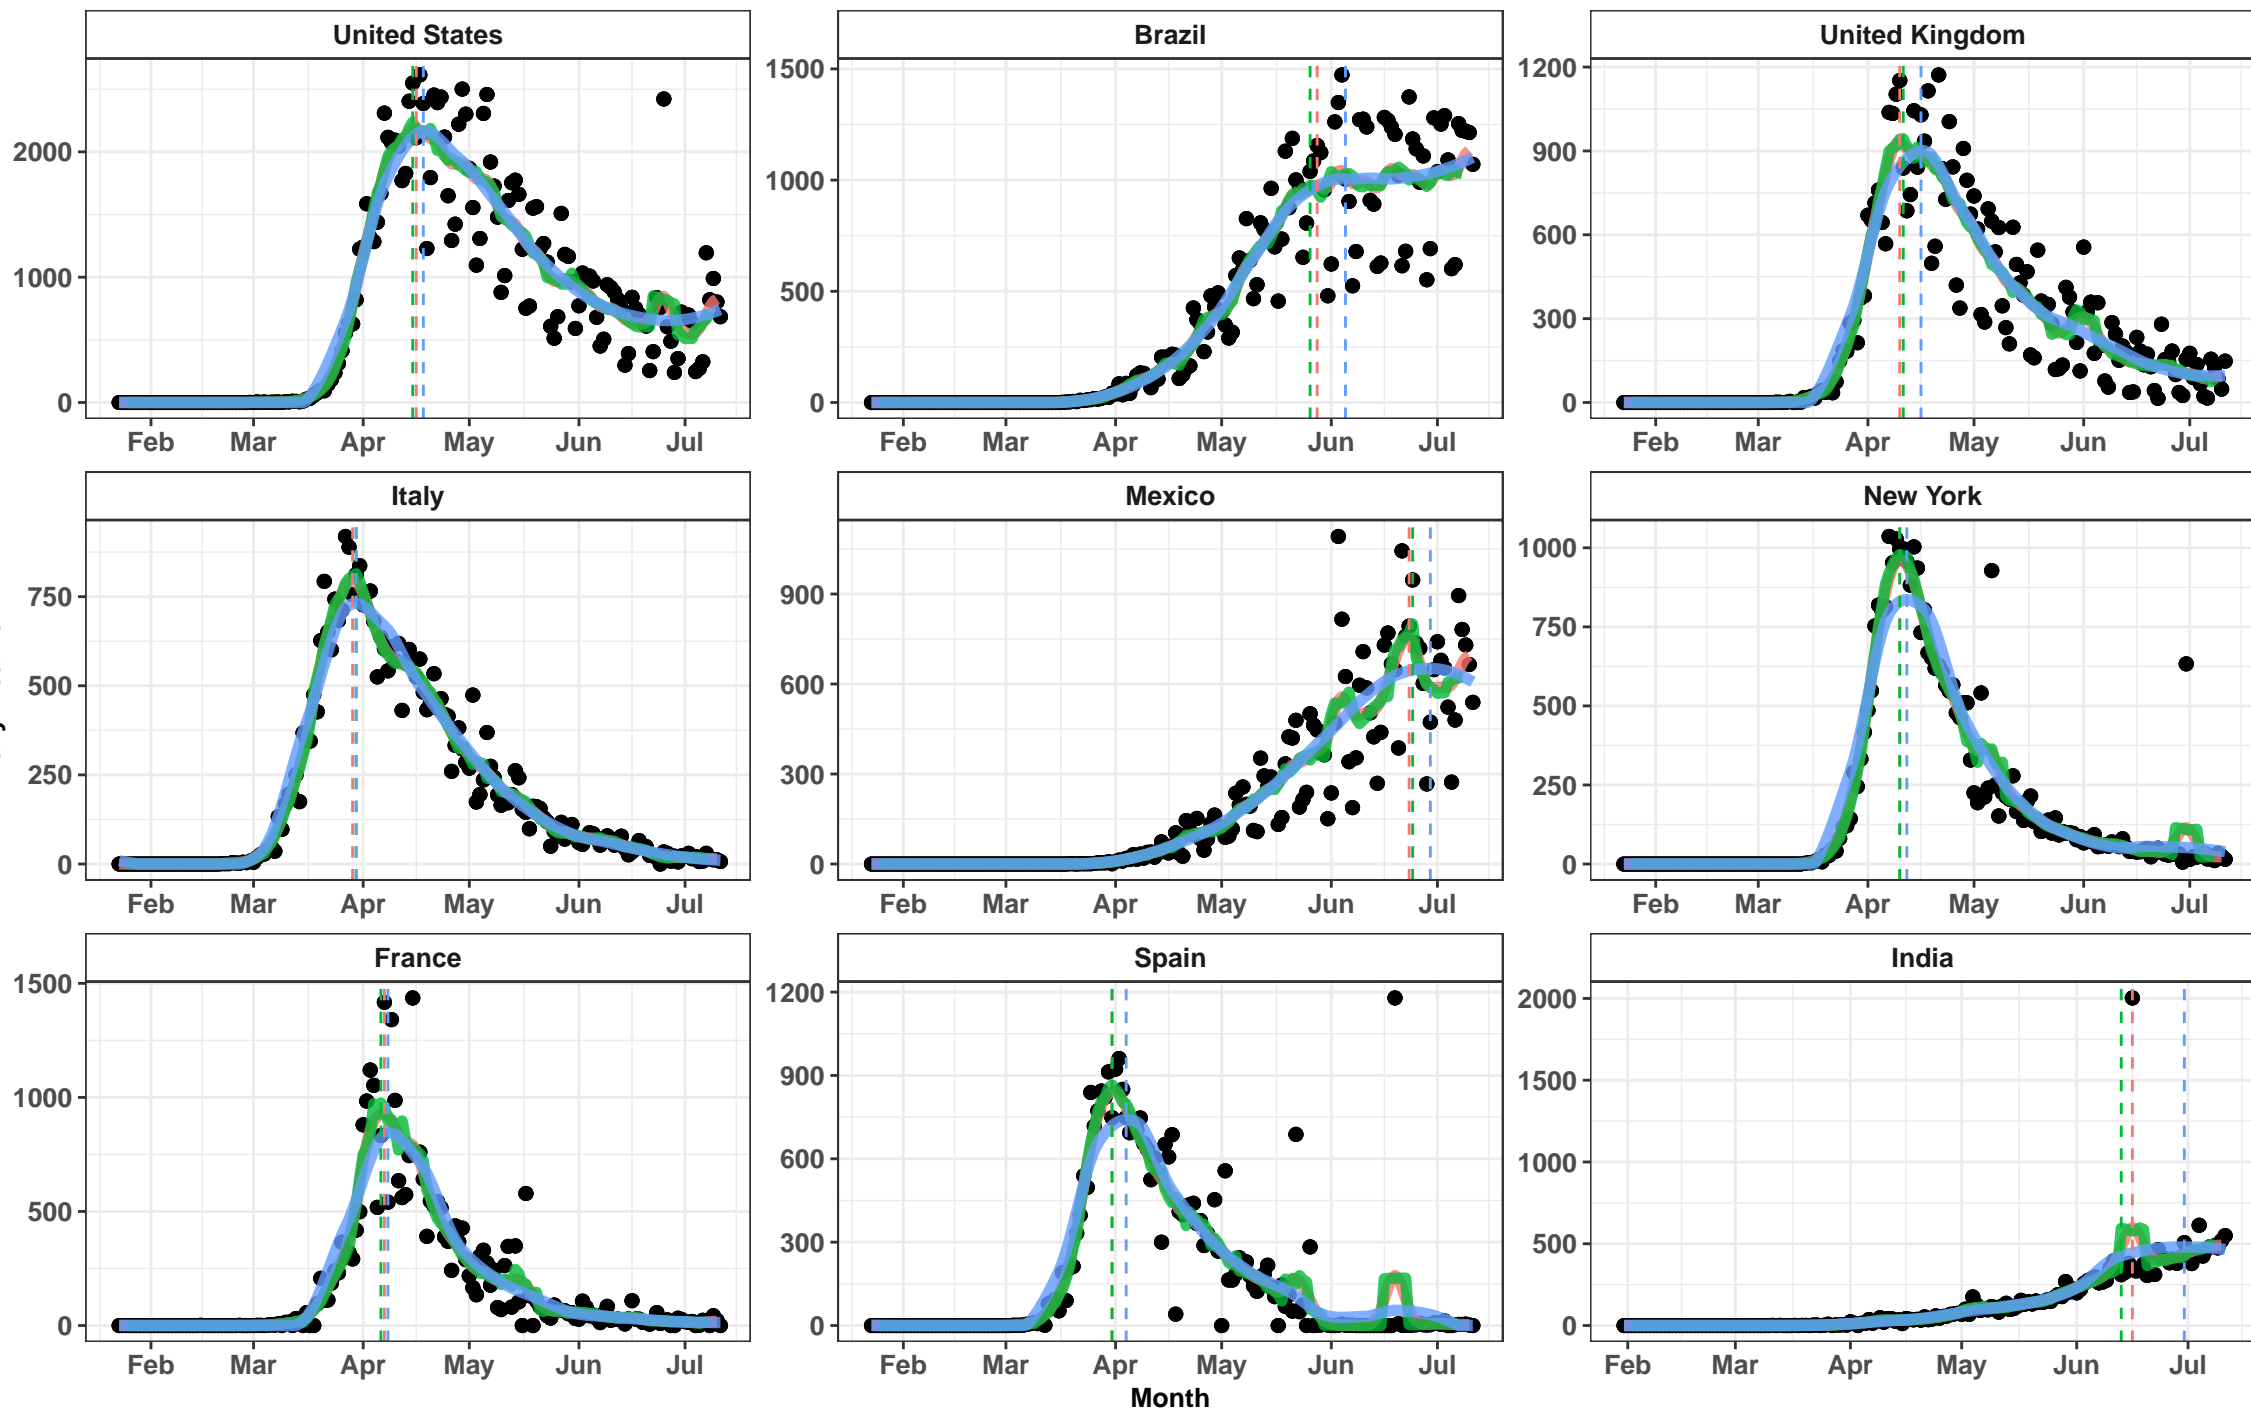

3 X 10 Day Rolling Average 7 Day Rolling Average Loess

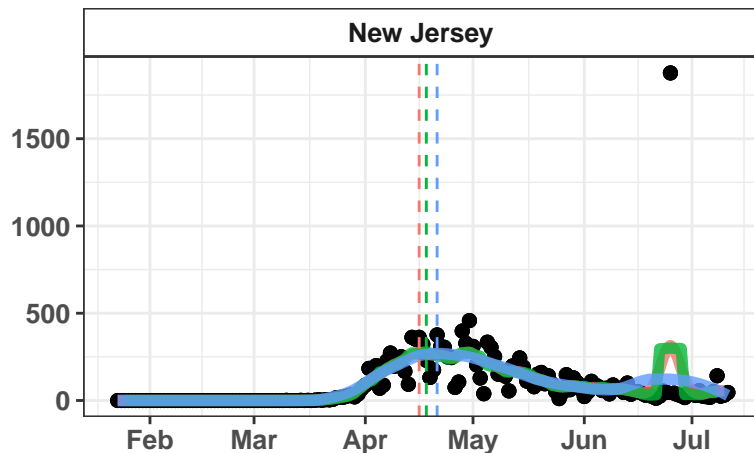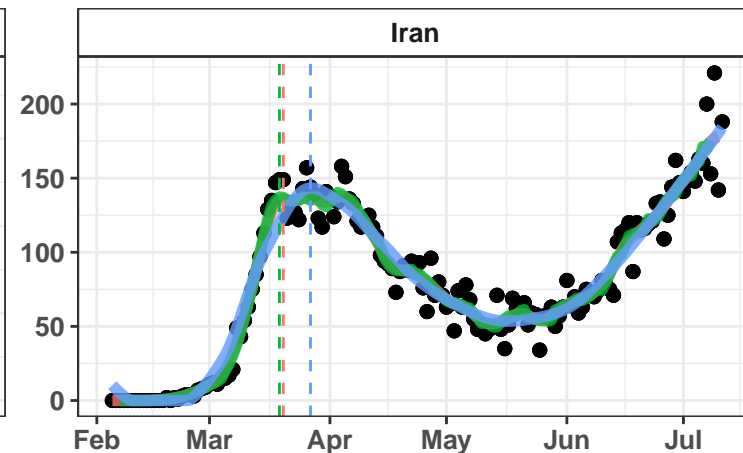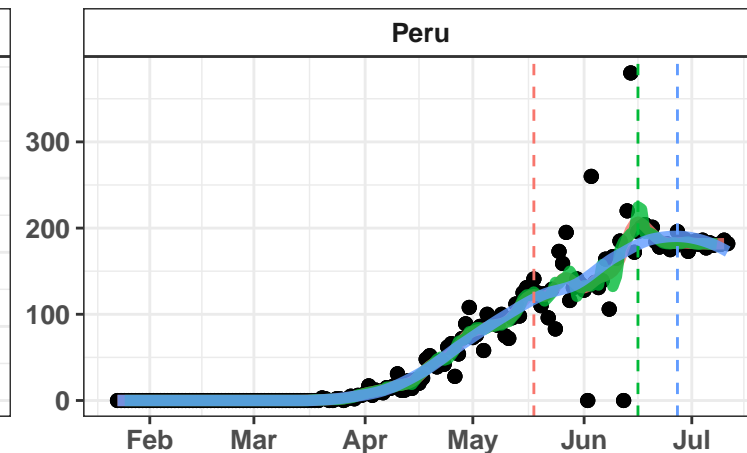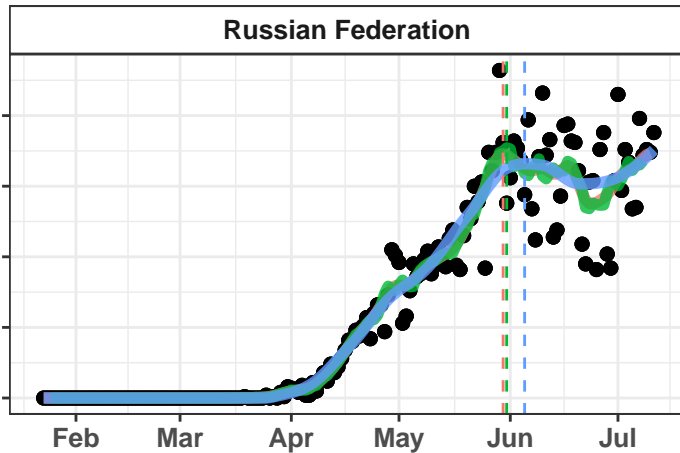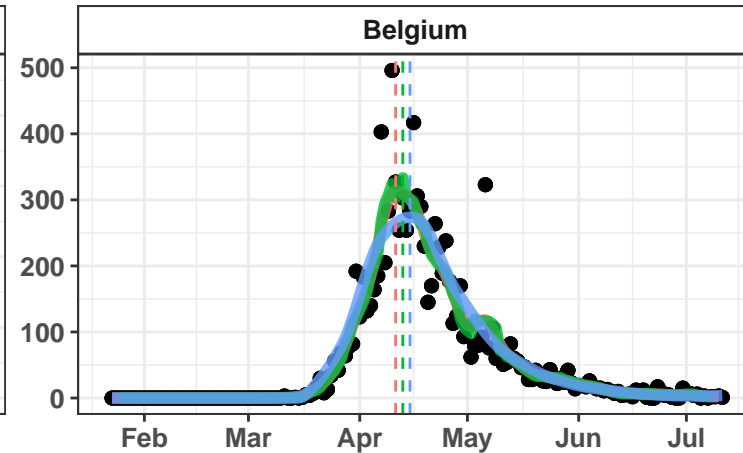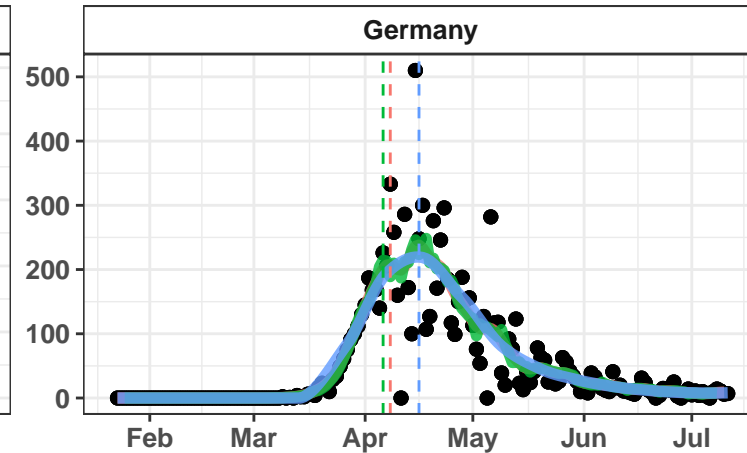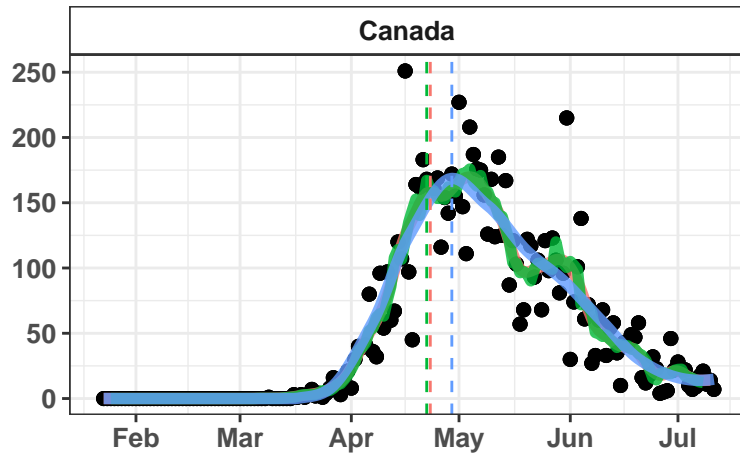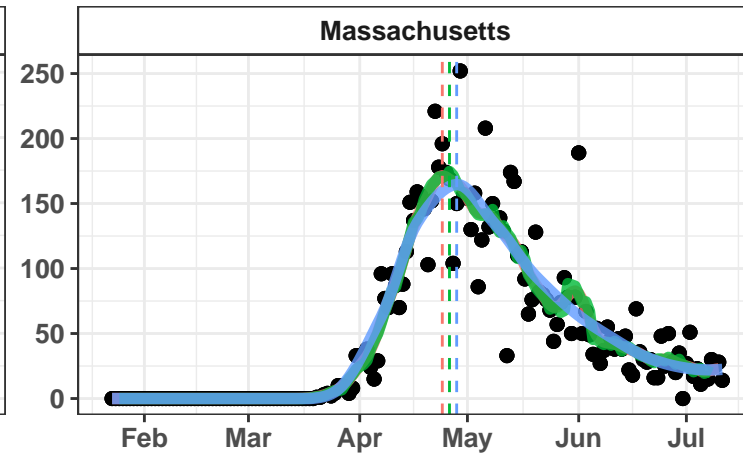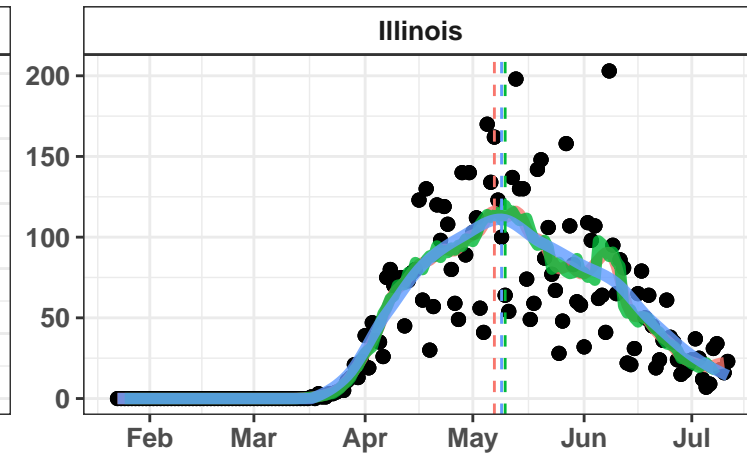

3 X 10 Day Rolling Average 7 Day Rolling Average Loess

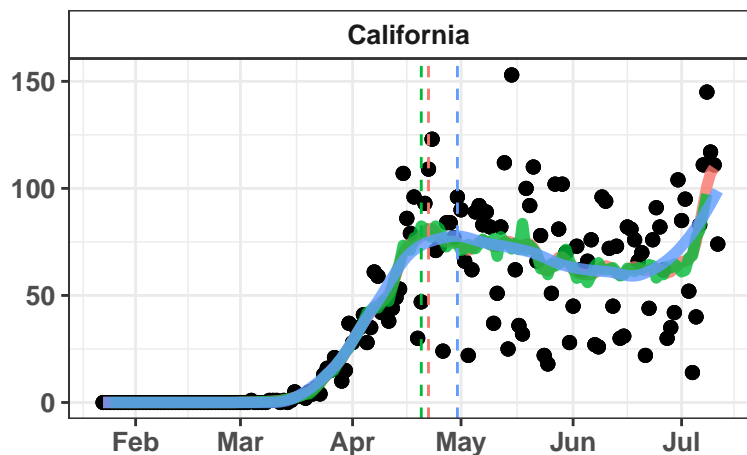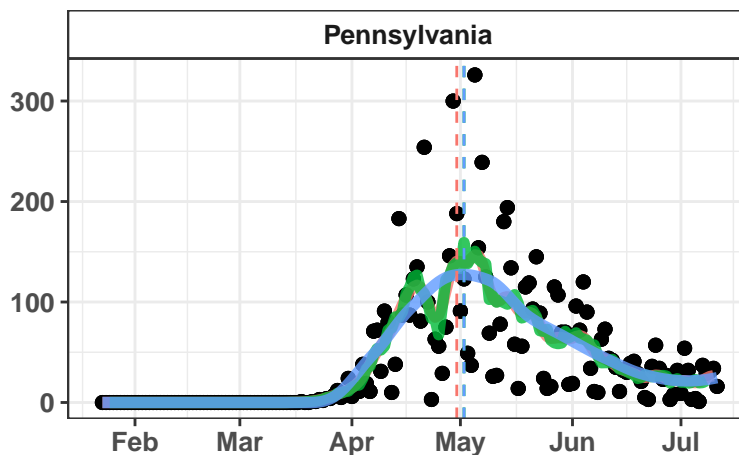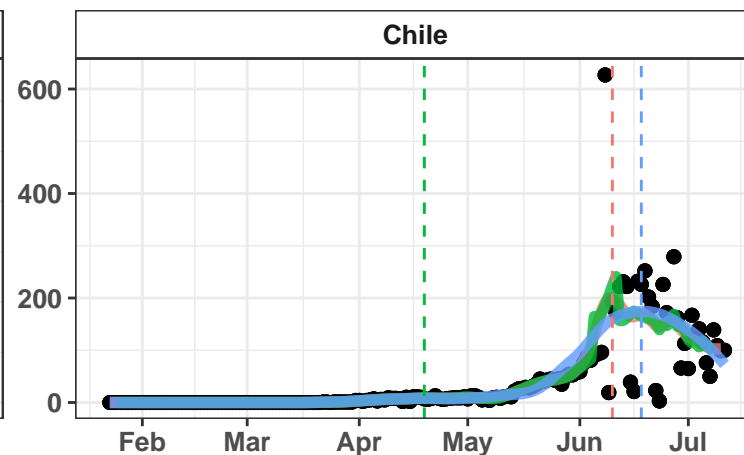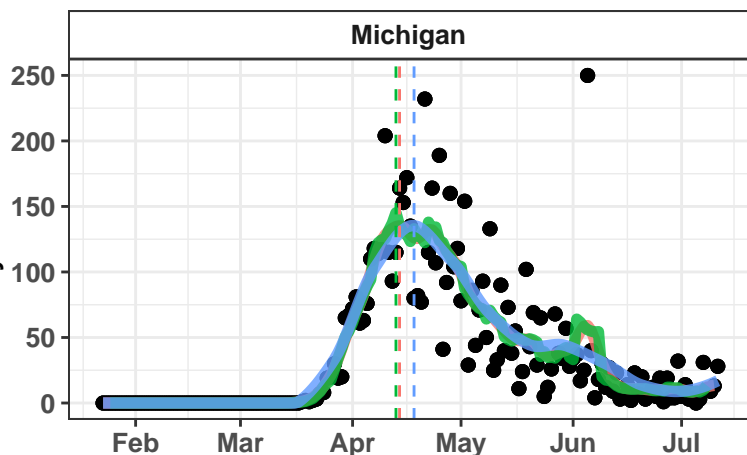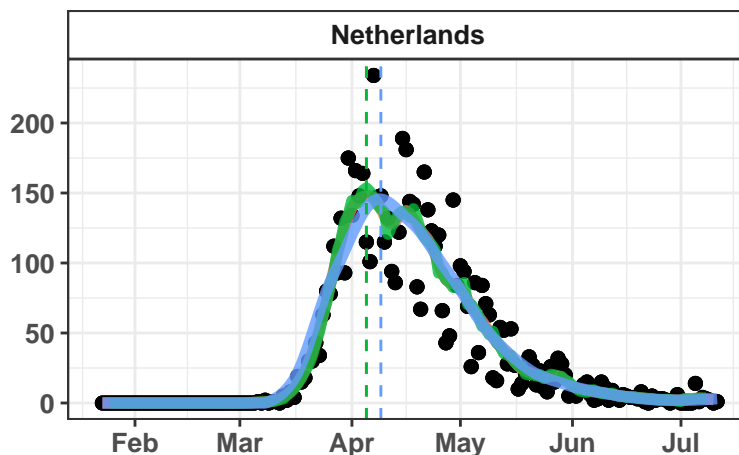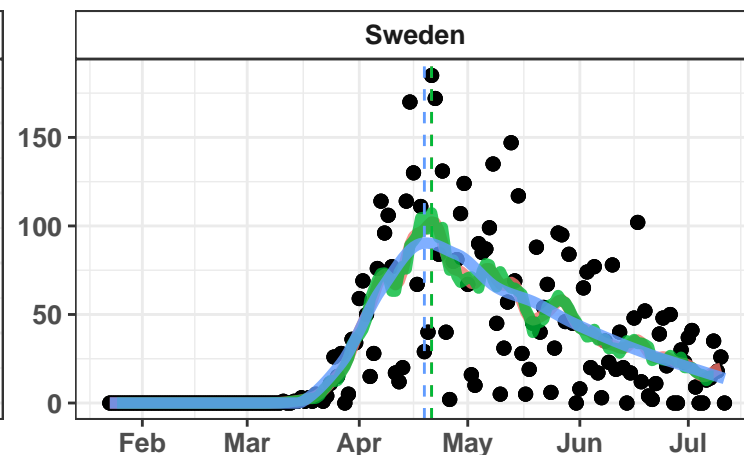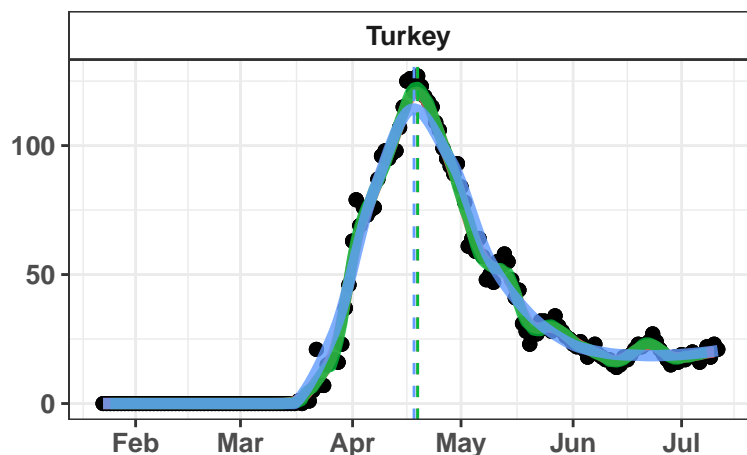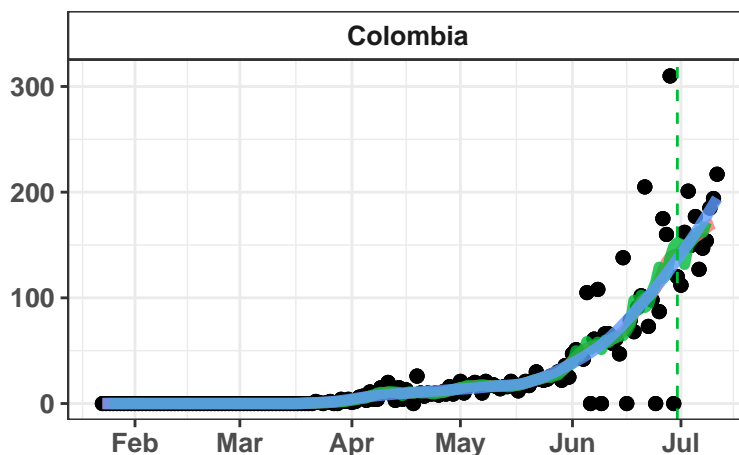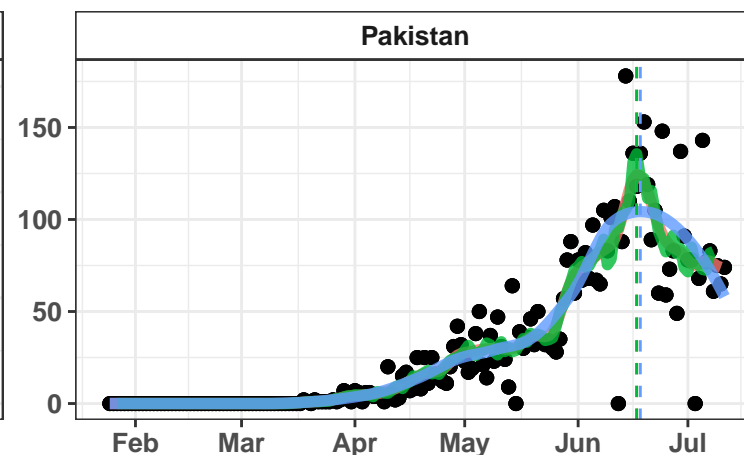

Month

3 X 10 Day Rolling Average 7 Day Rolling Average Loess

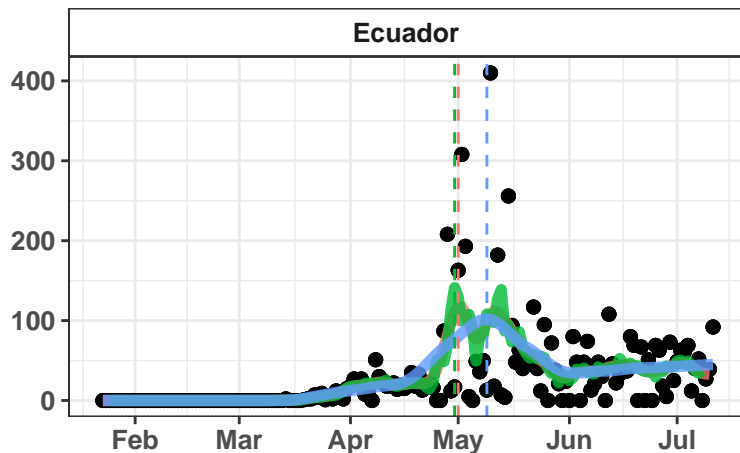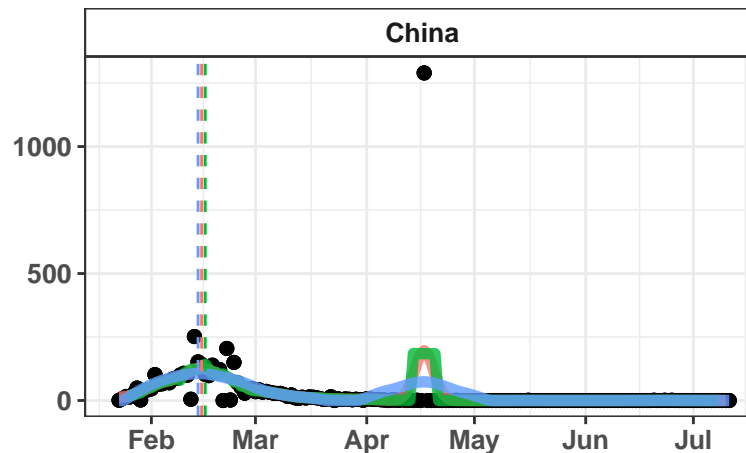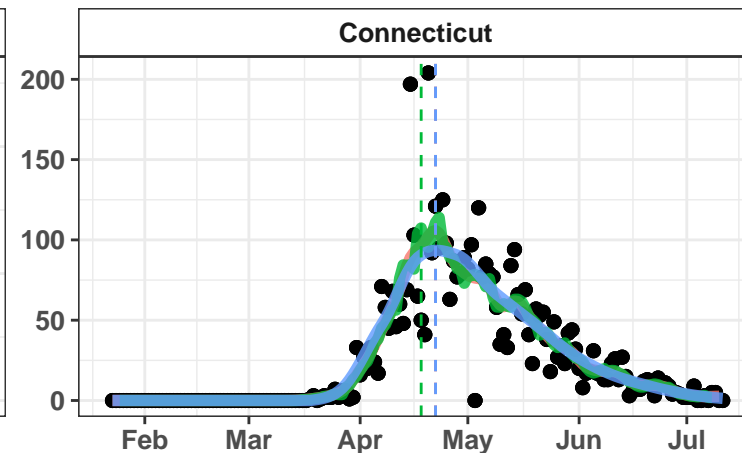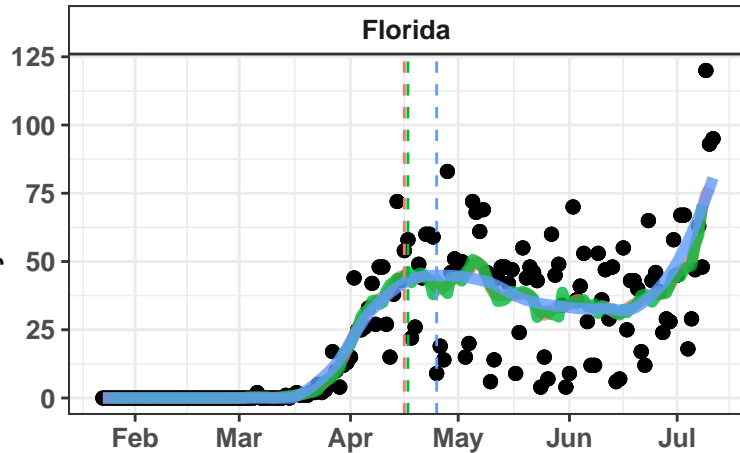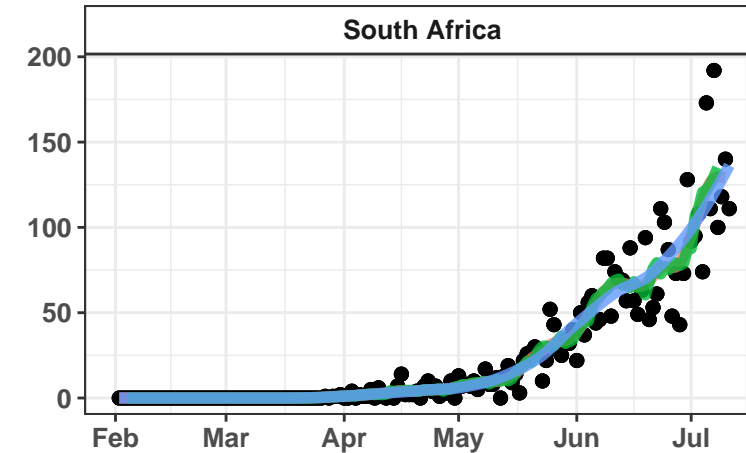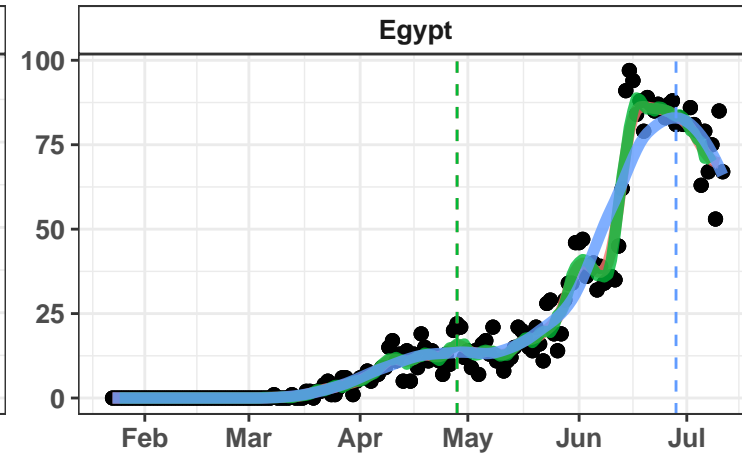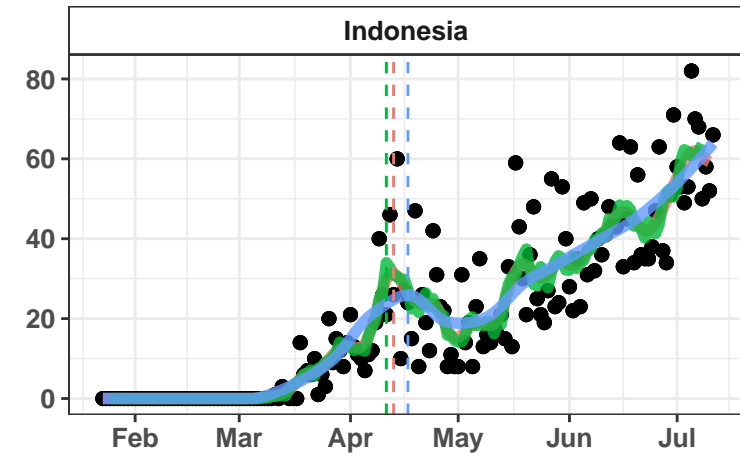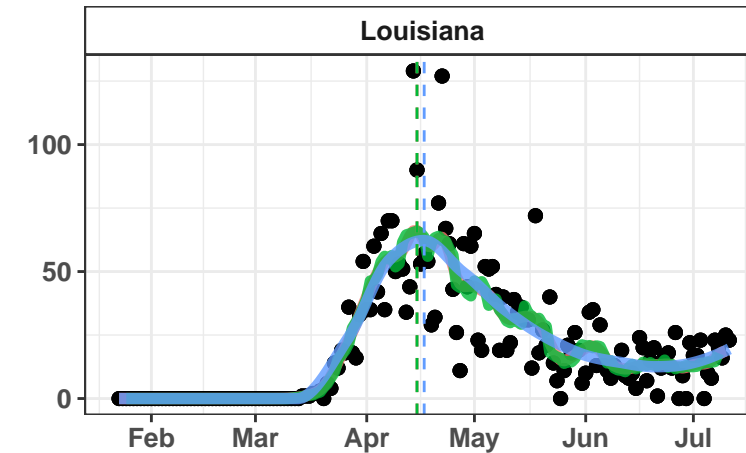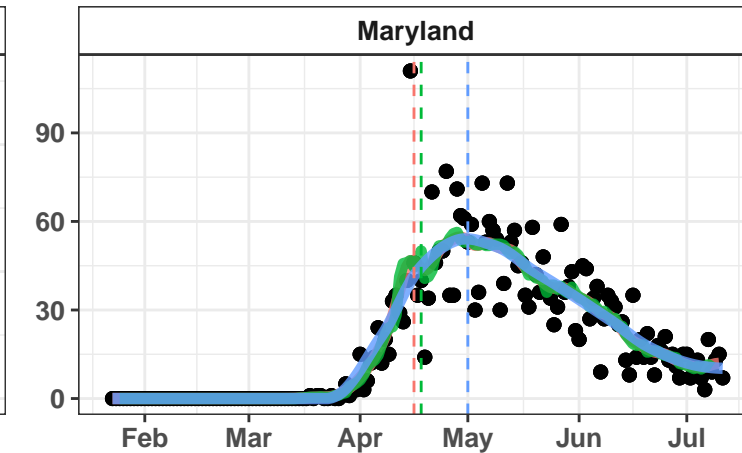

3 X 10 Day Rolling Average 7 Day Rolling Average Loess

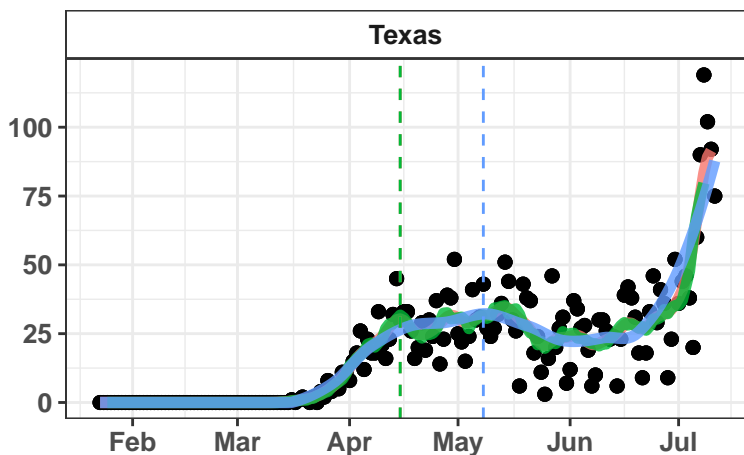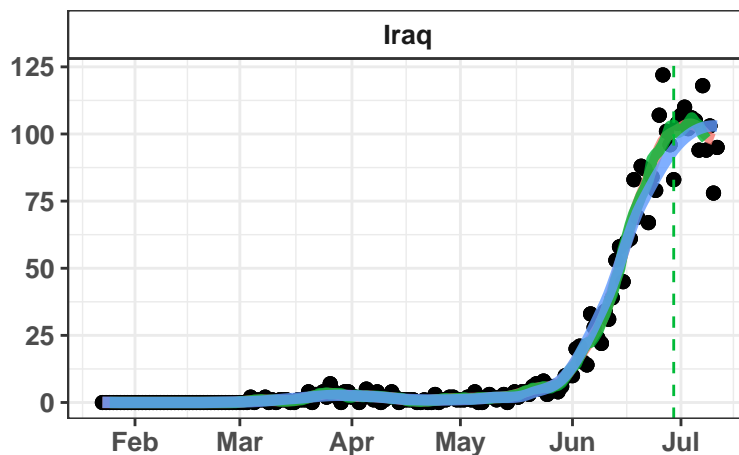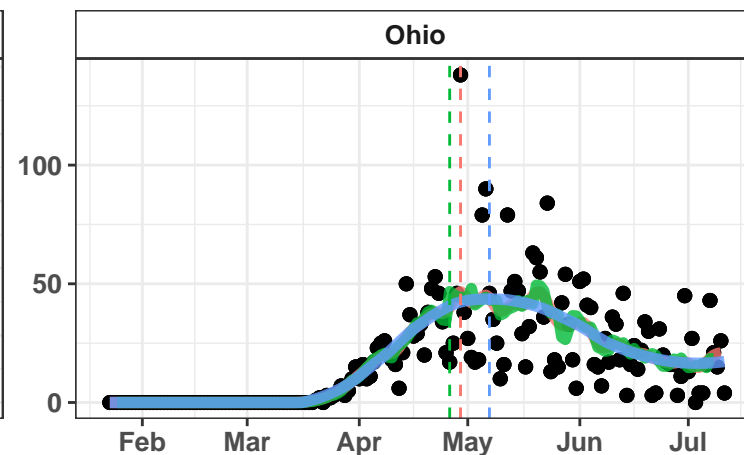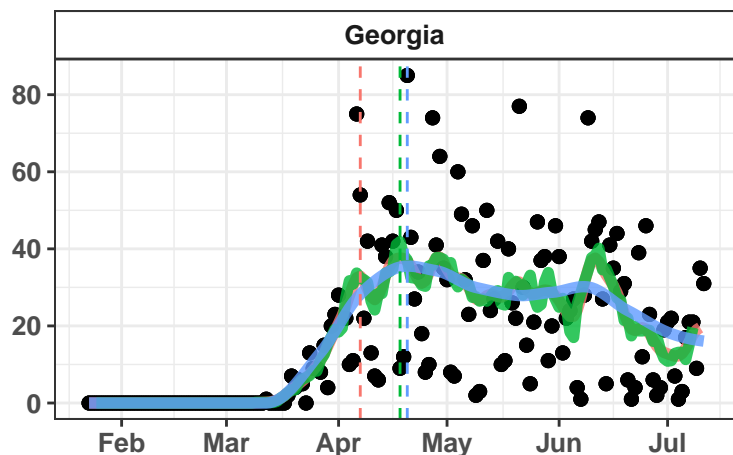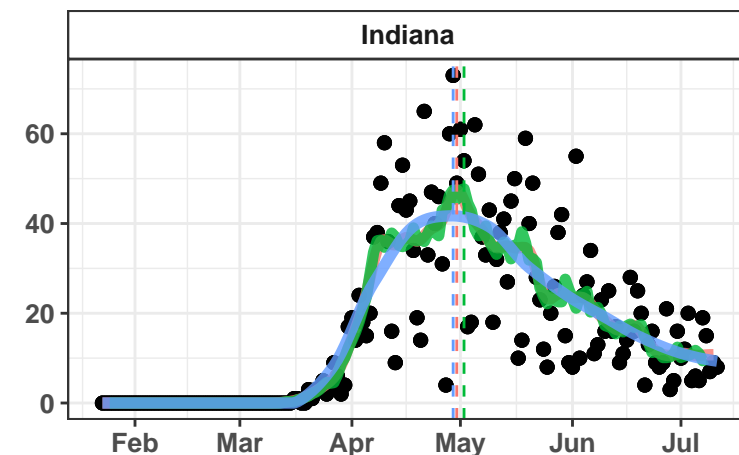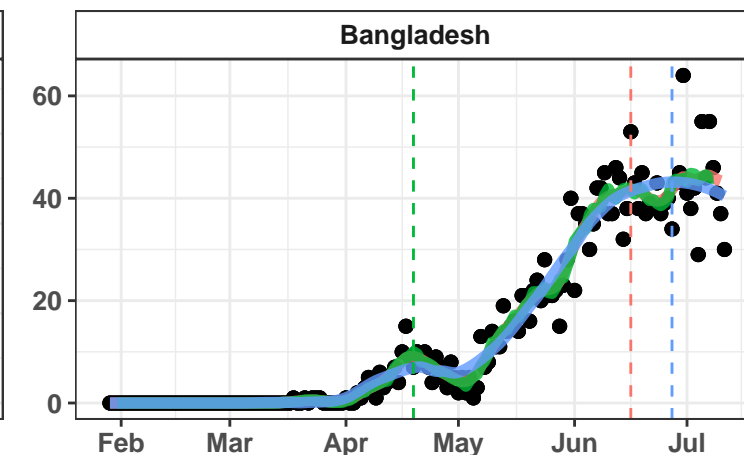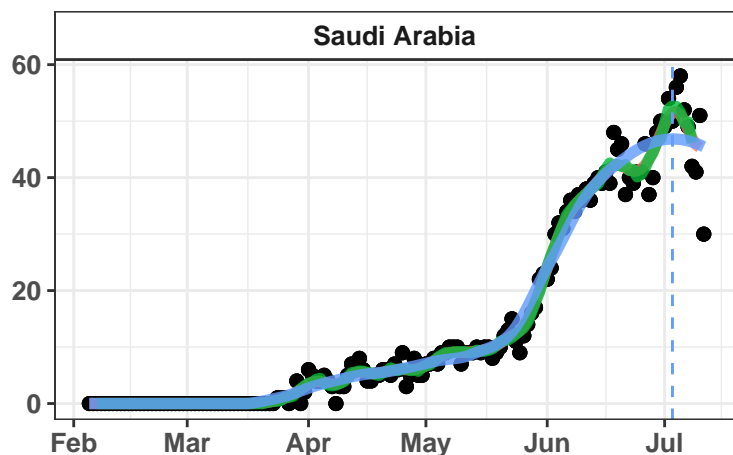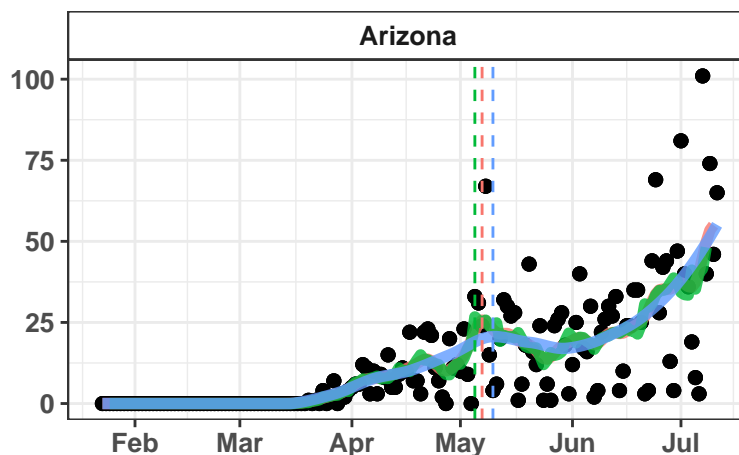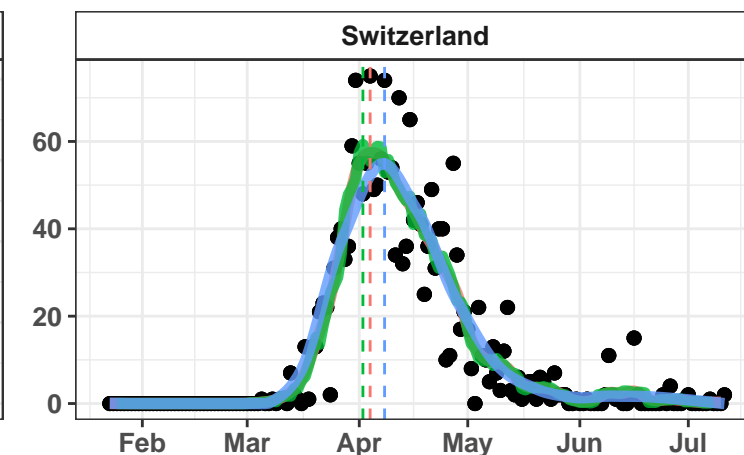

Month

3 X 10 Day Rolling Average 7 Day Rolling Average Loess

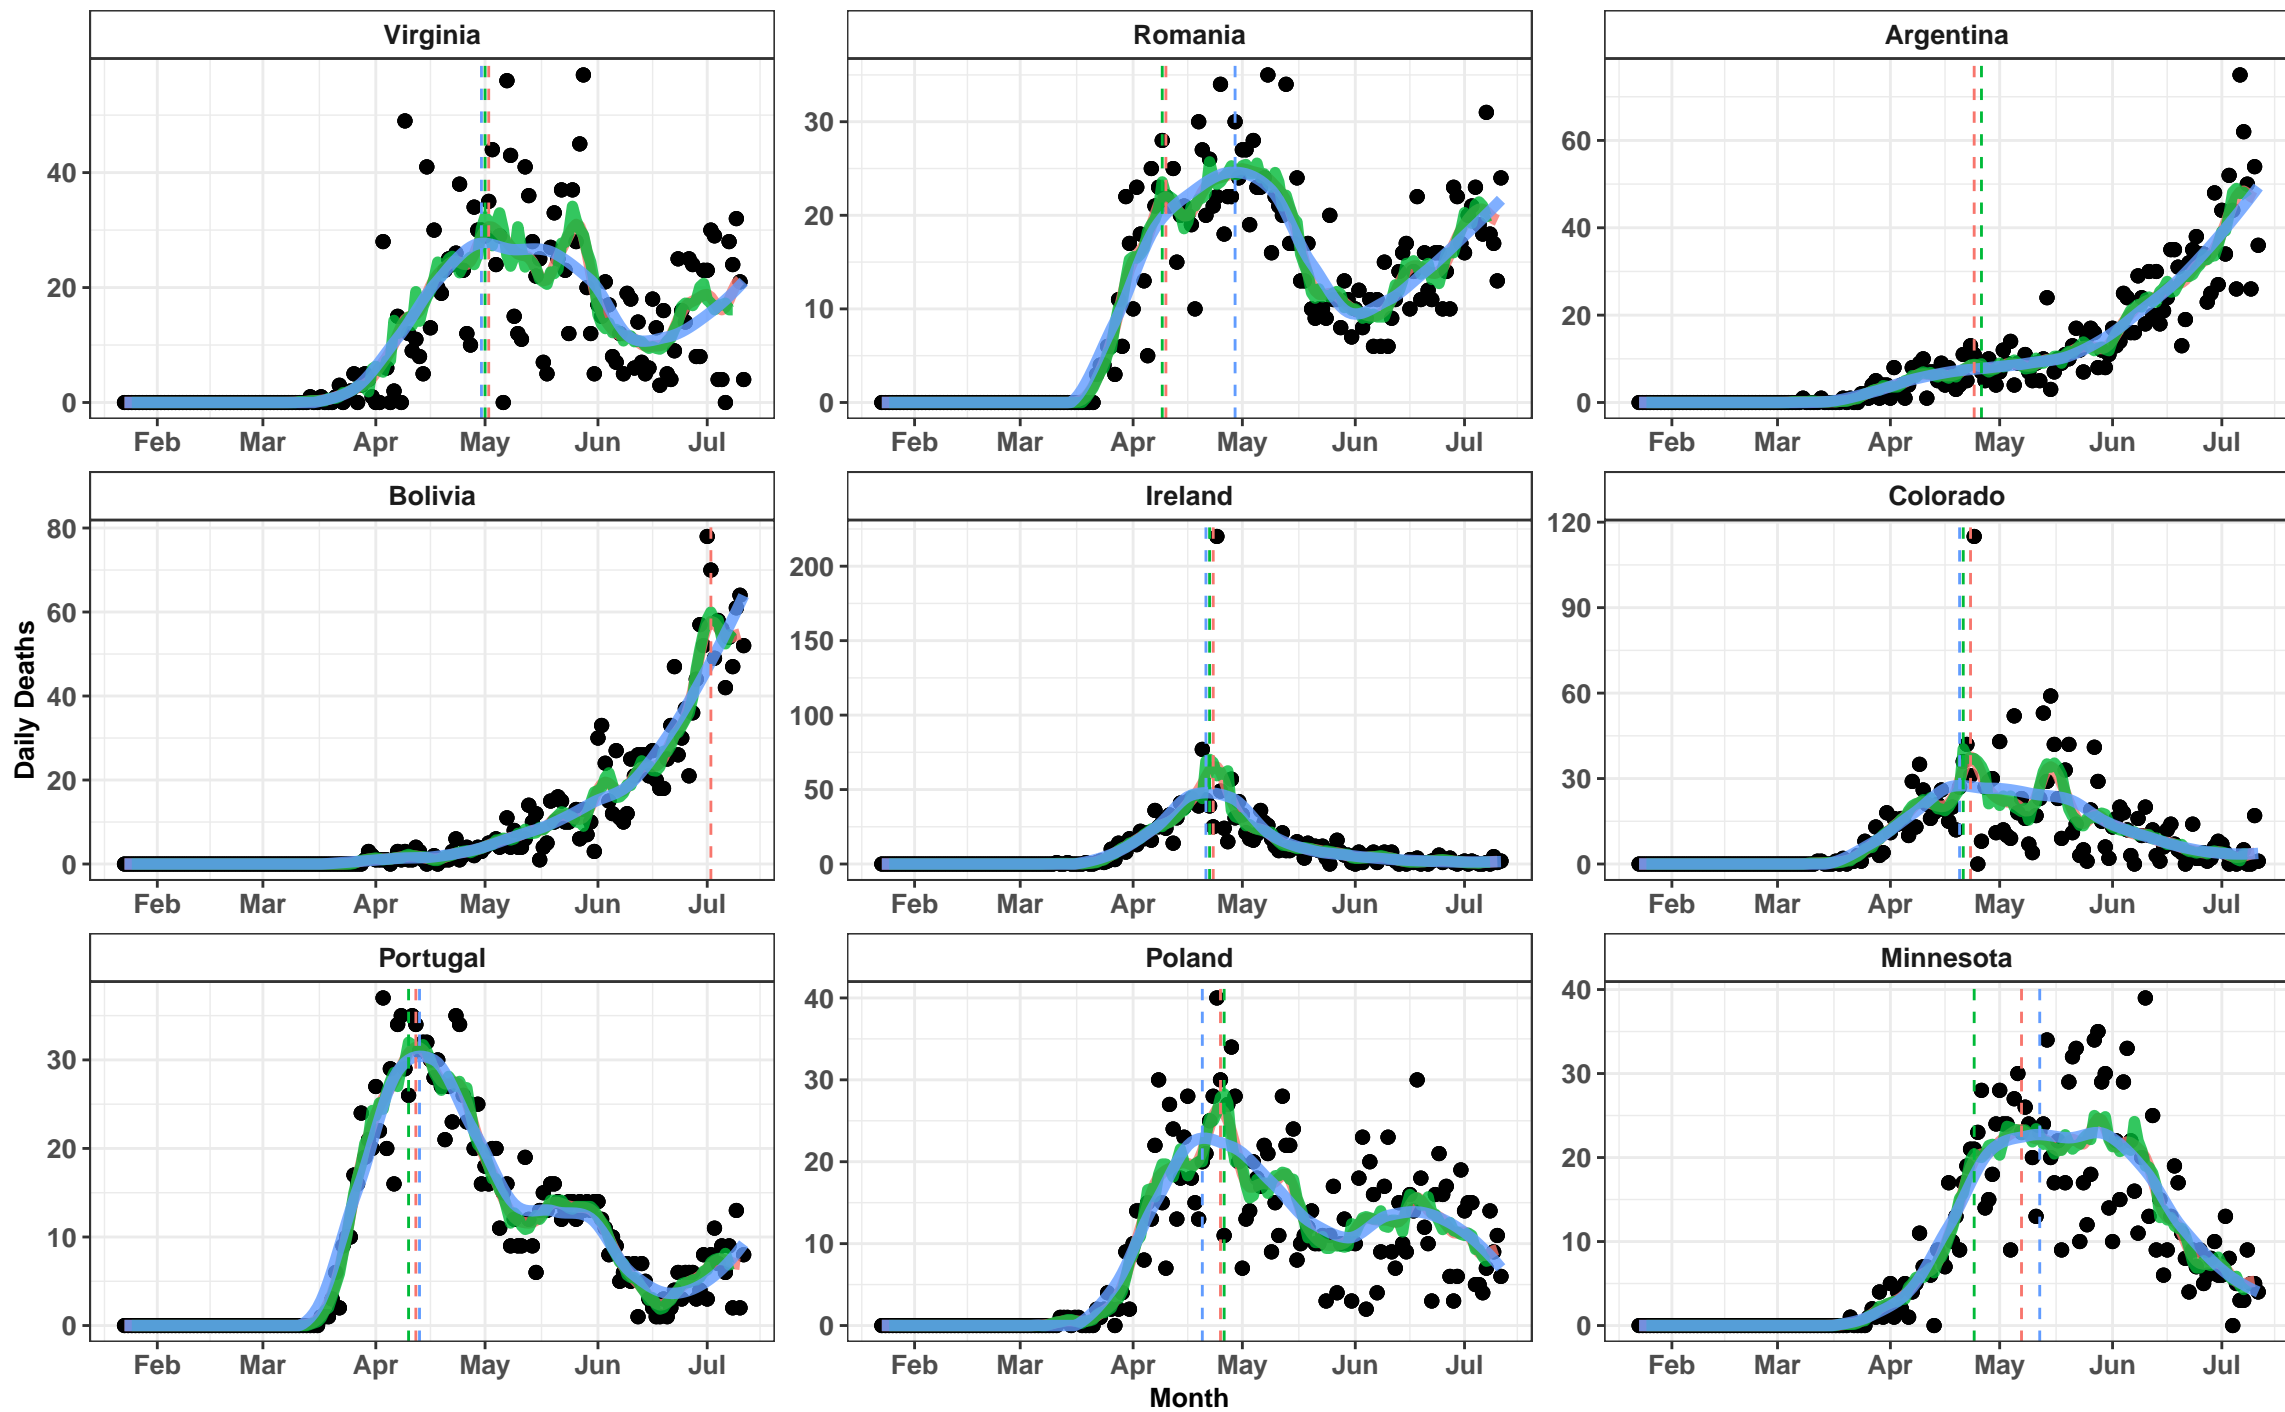

3 X 10 Day Rolling Average 7 Day Rolling Average Loess

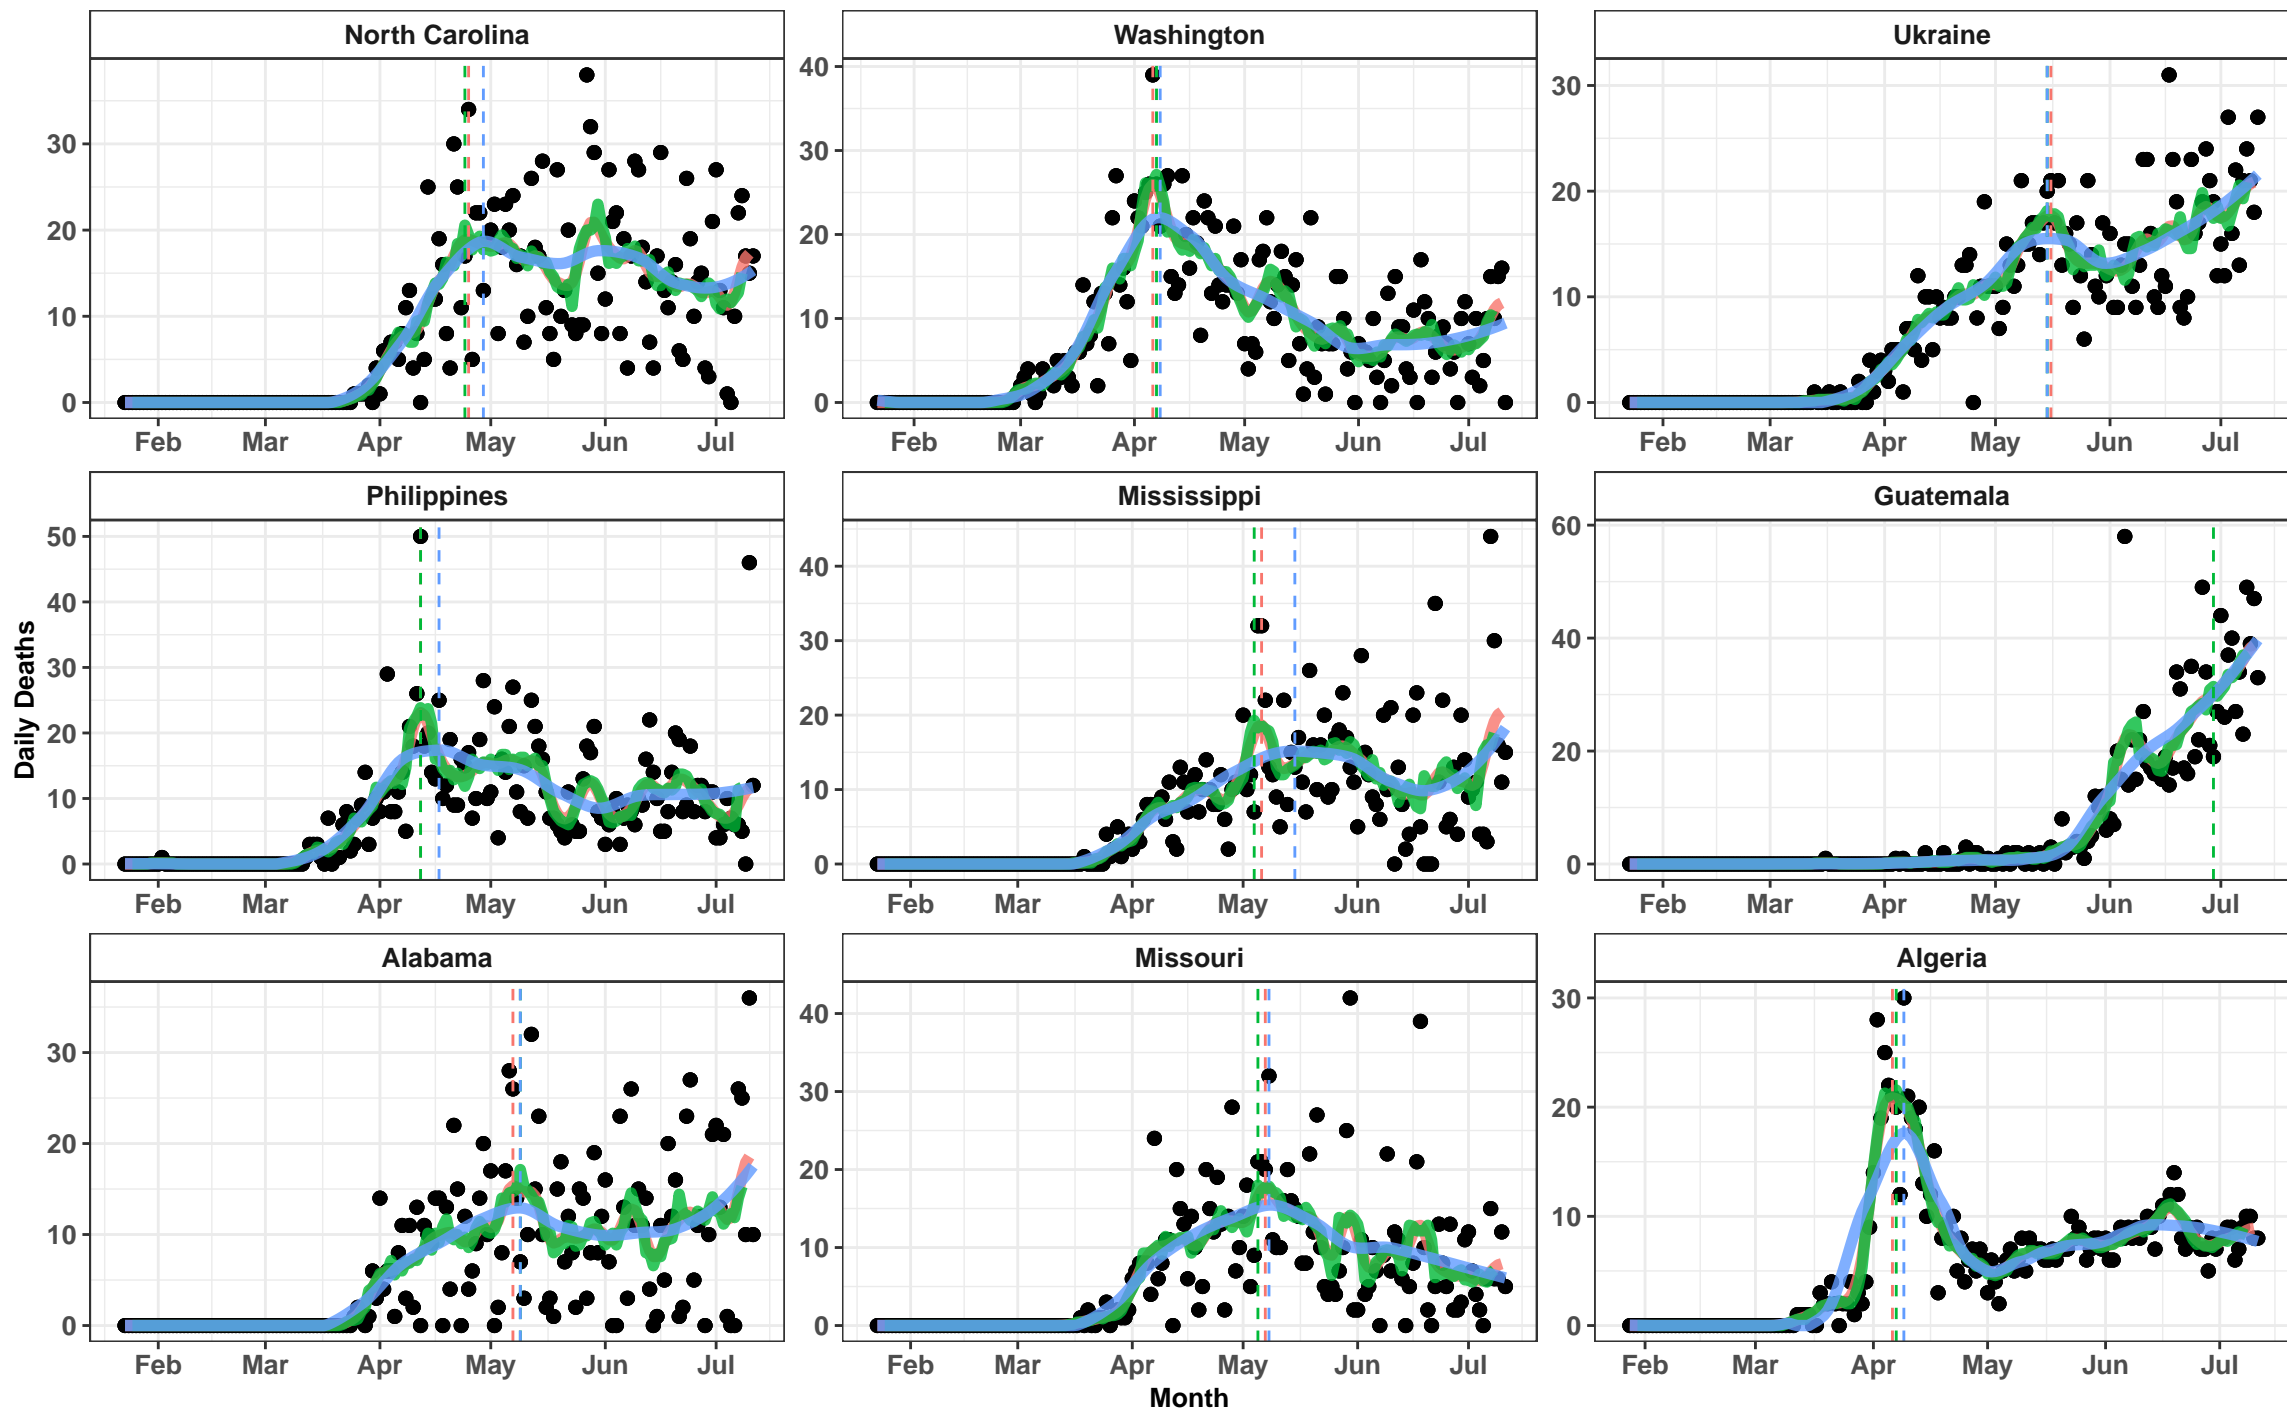

3 X 10 Day Rolling Average 7 Day Rolling Average Loess

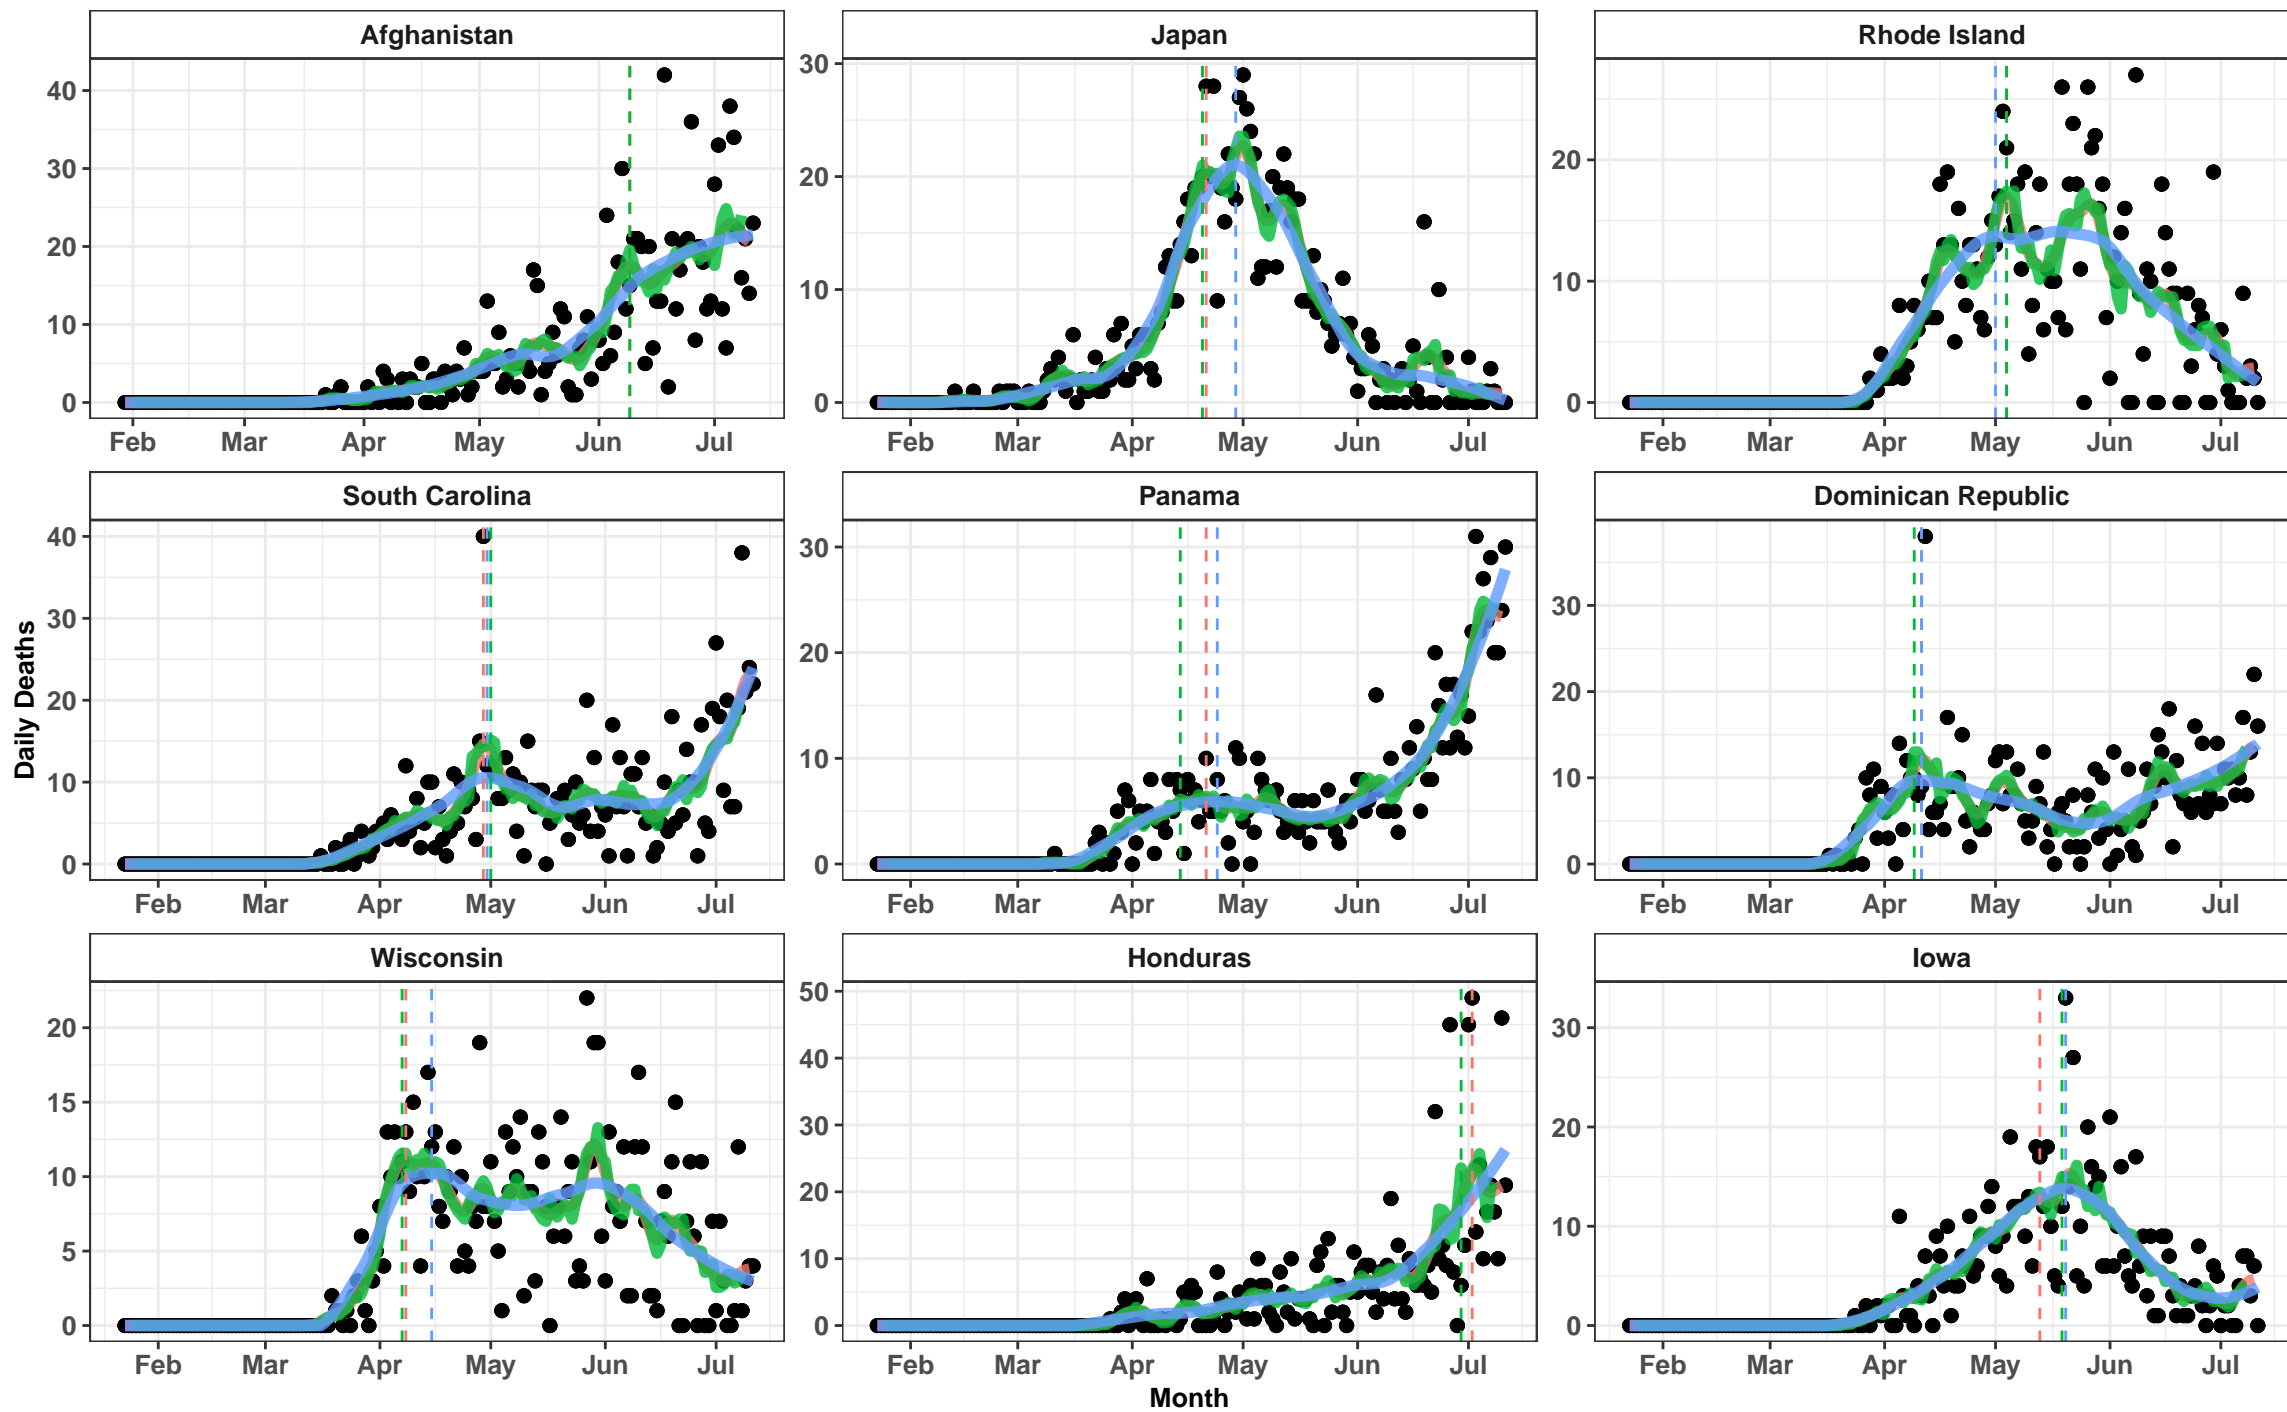



3 X 10 Day Rolling Average 7 Day Rolling Average Loess

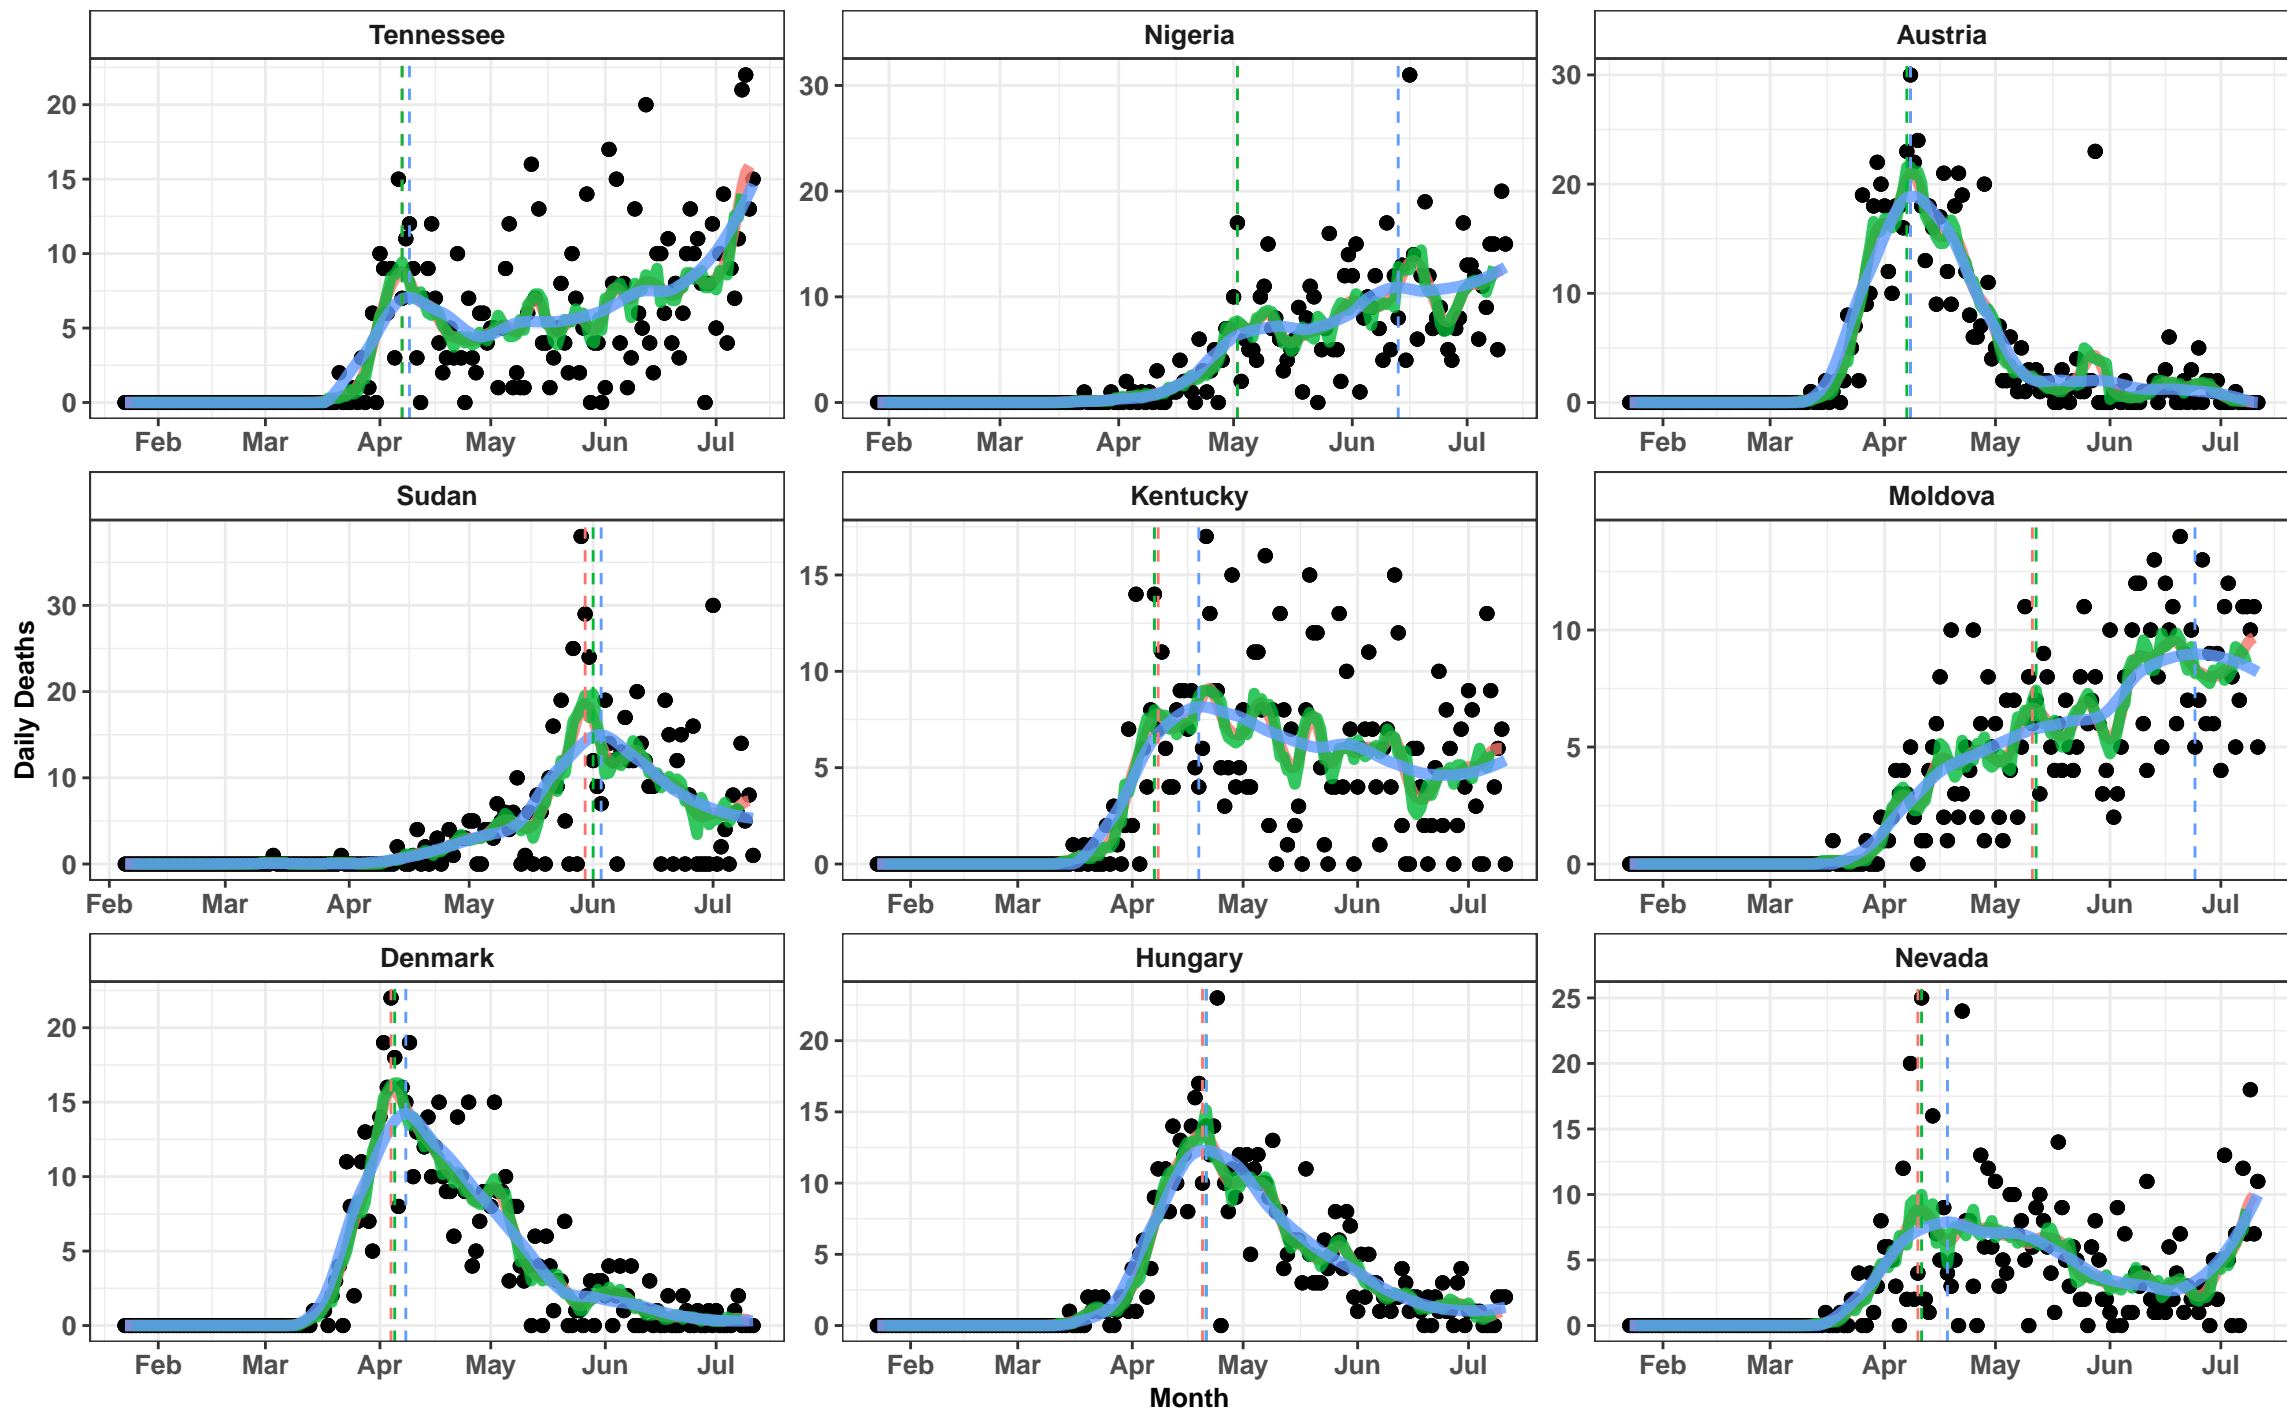

3 X 10 Day Rolling Average 7 Day Rolling Average Loess

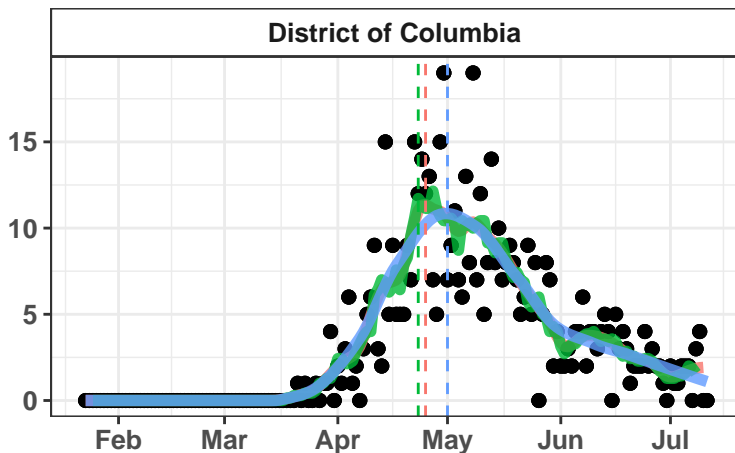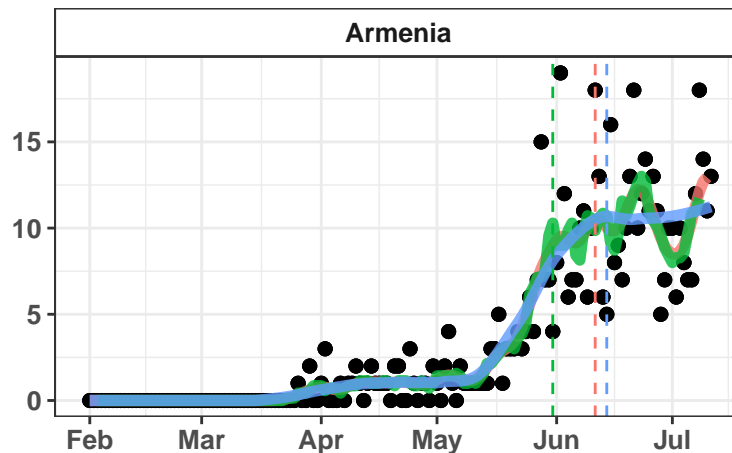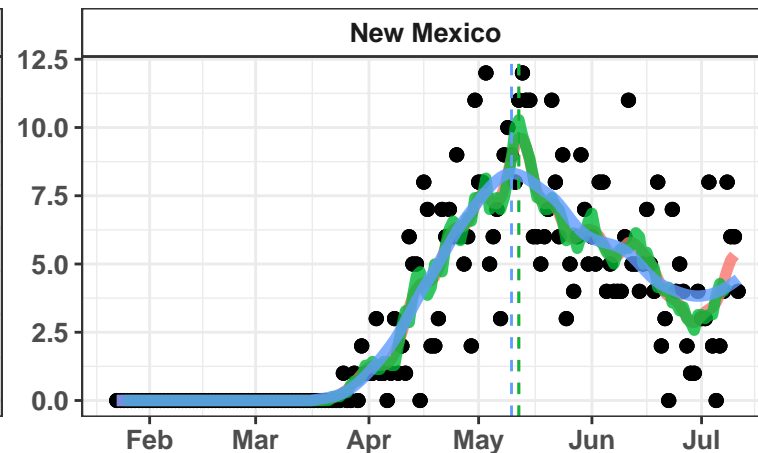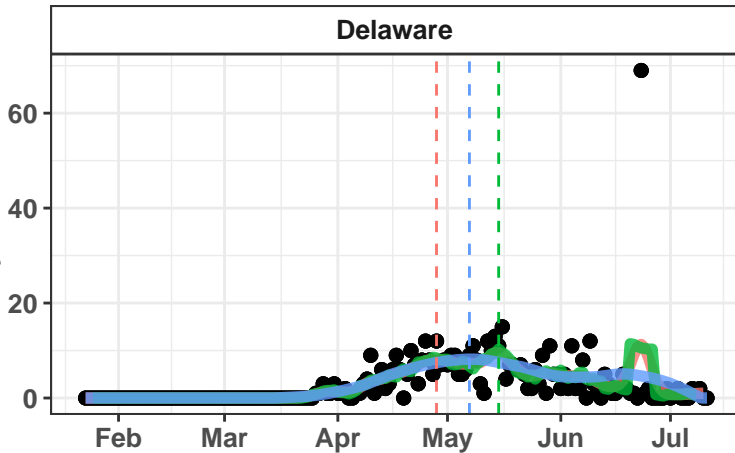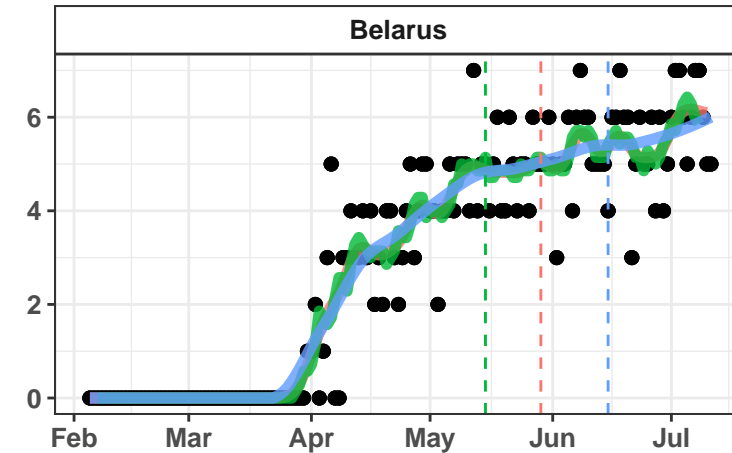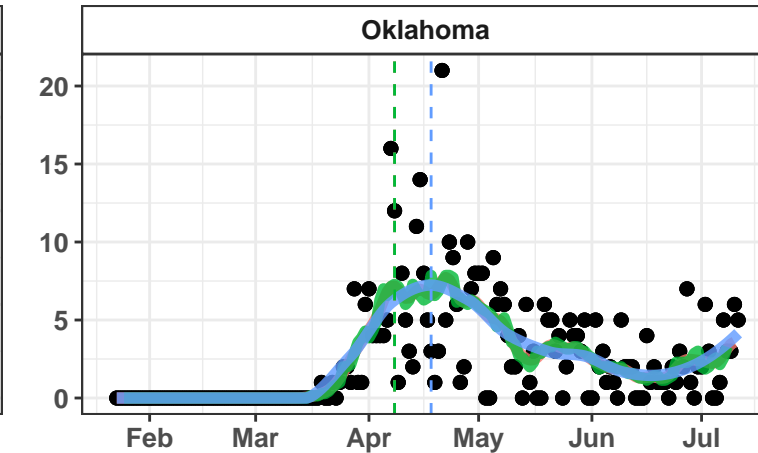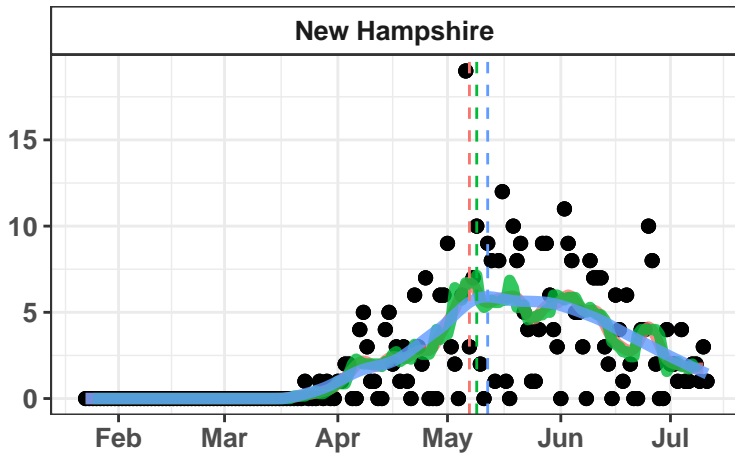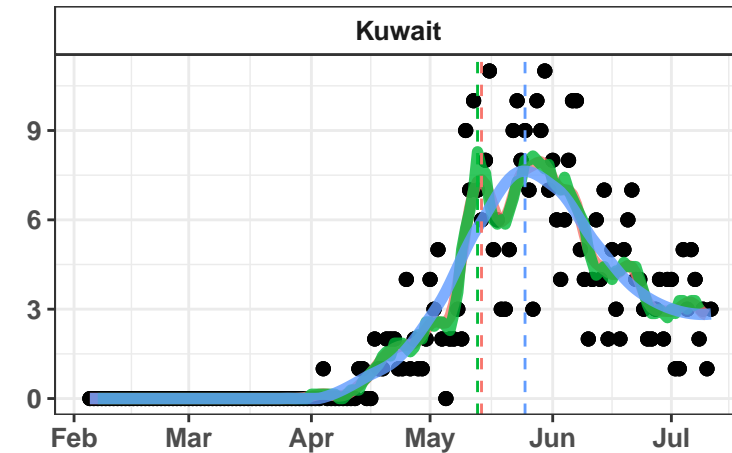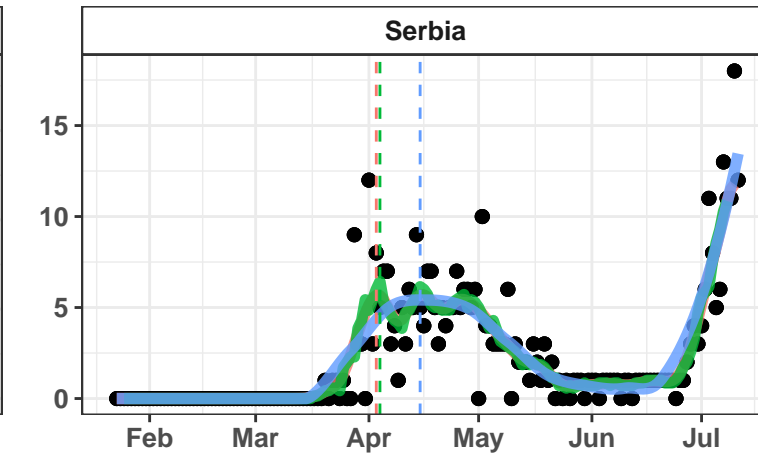

3 X 10 Day Rolling Average 7 Day Rolling Average Loess

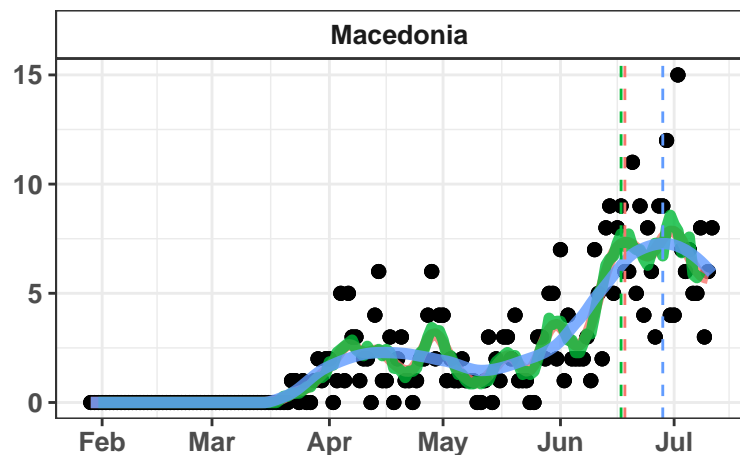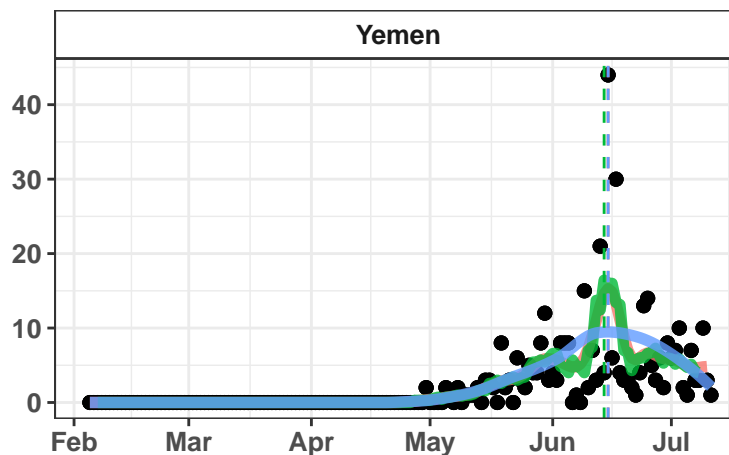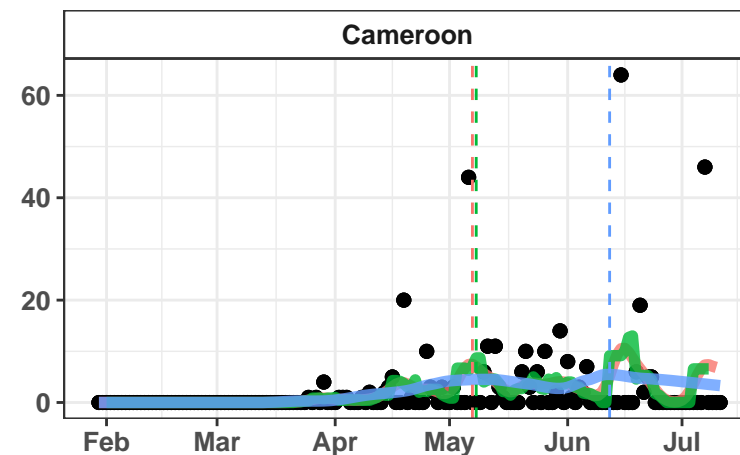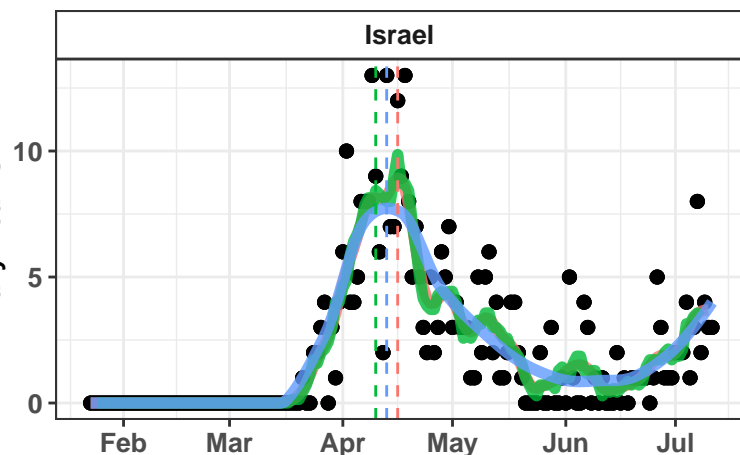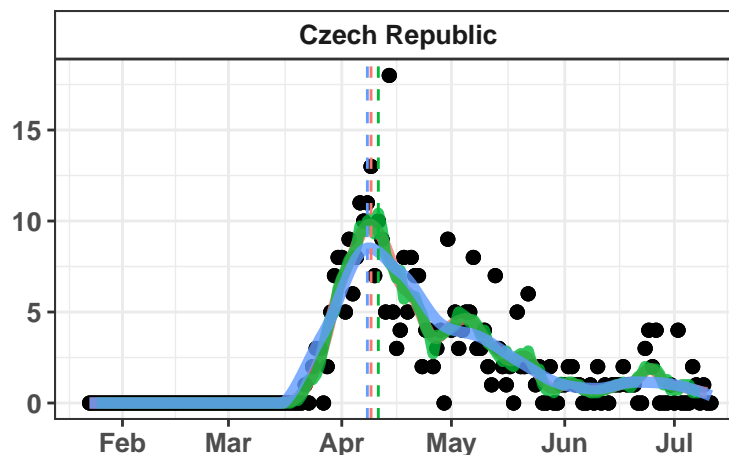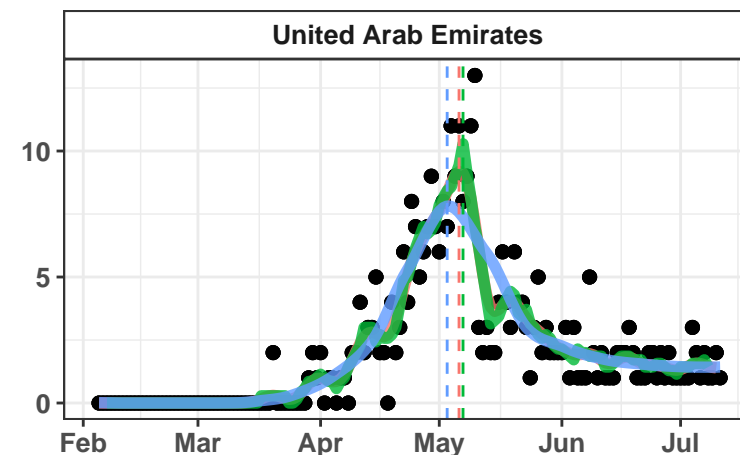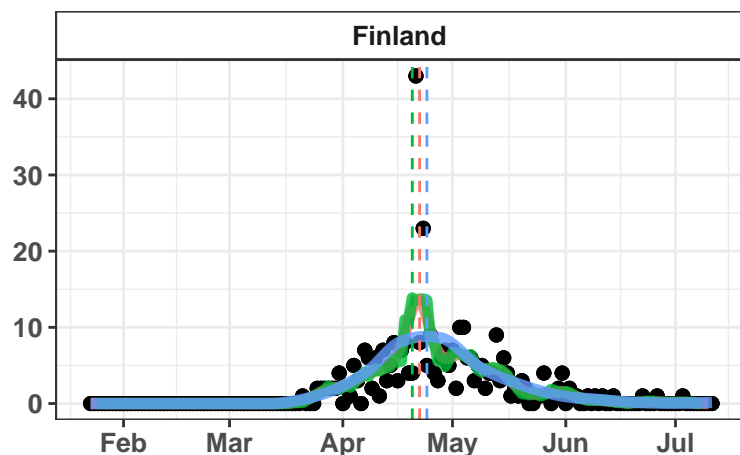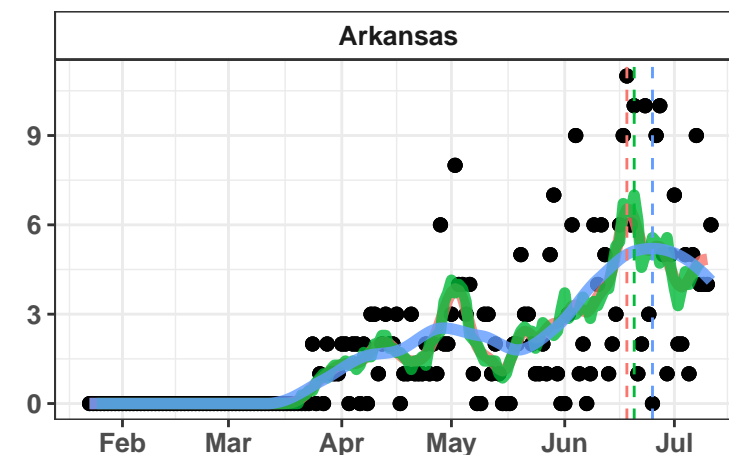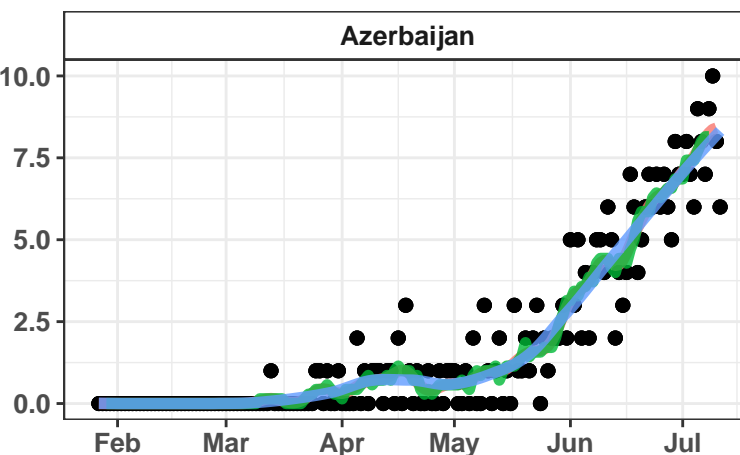

3 X 10 Day Rolling Average 7 Day Rolling Average Loess

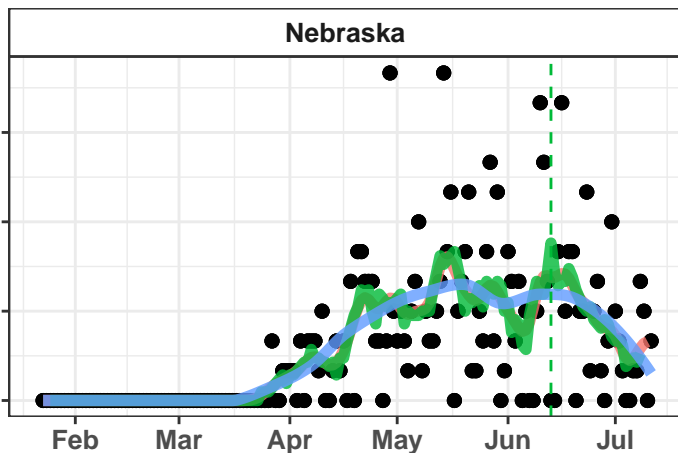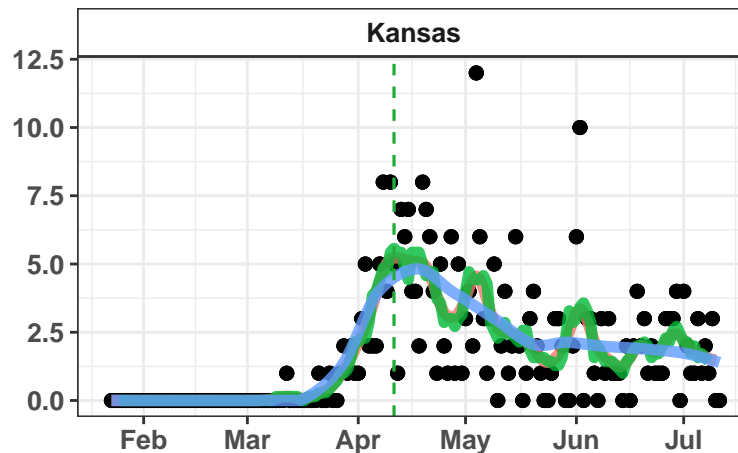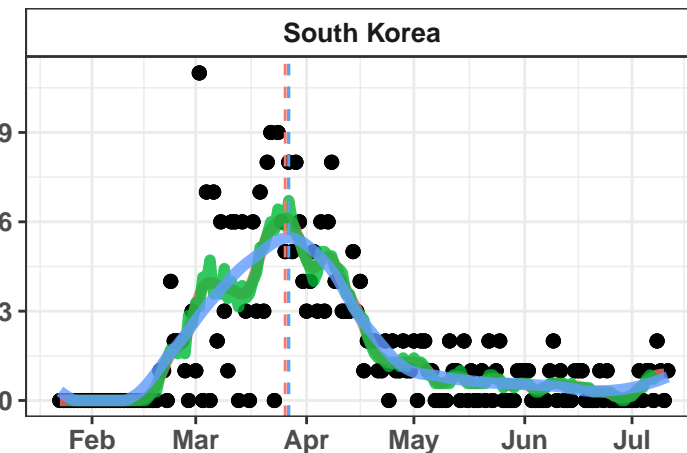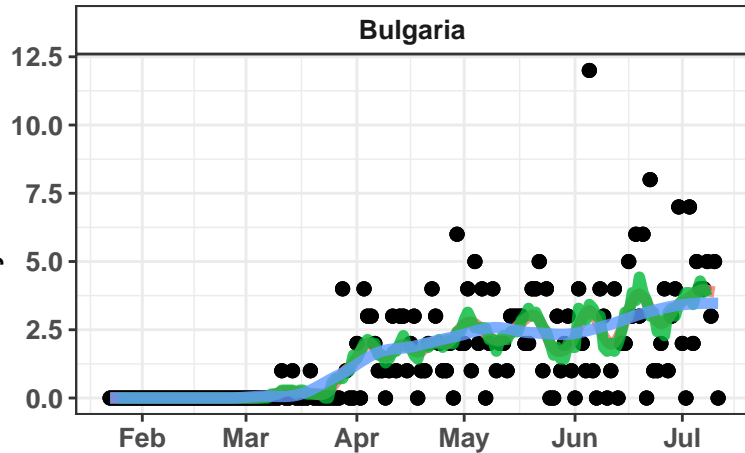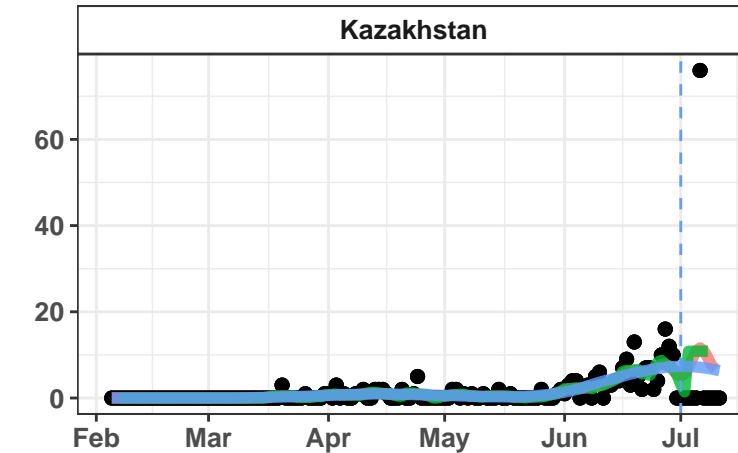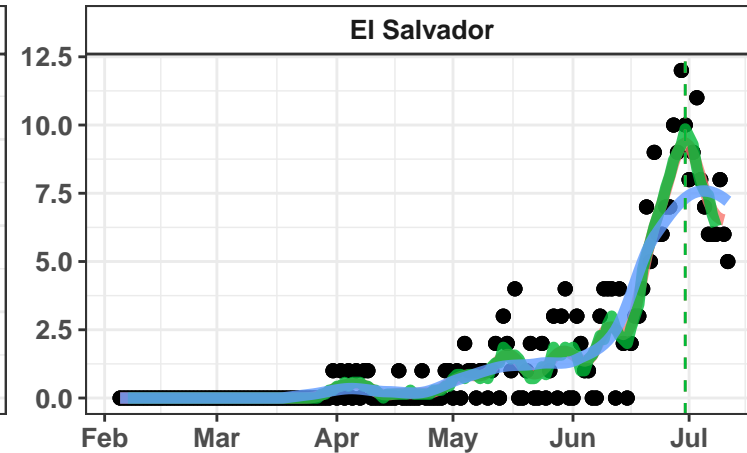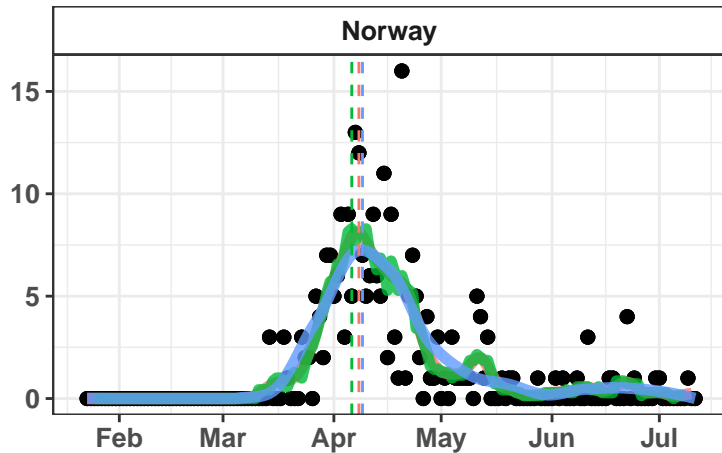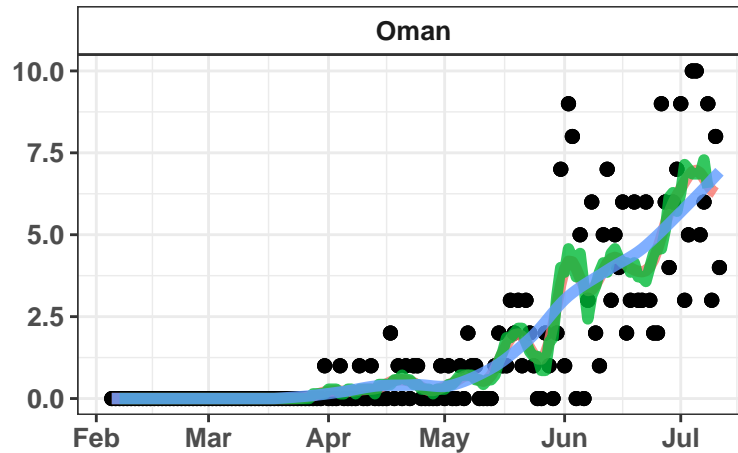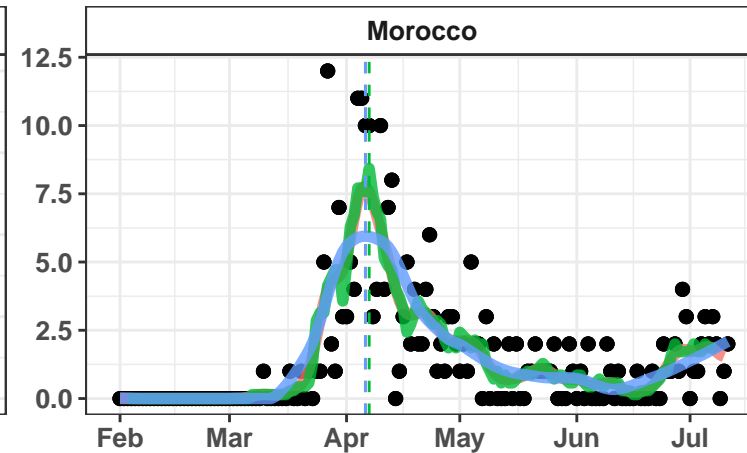

3 X 10 Day Rolling Average 7 Day Rolling Average Loess

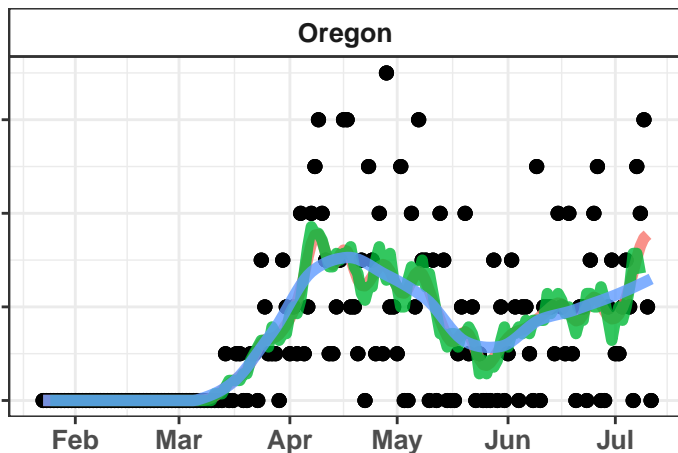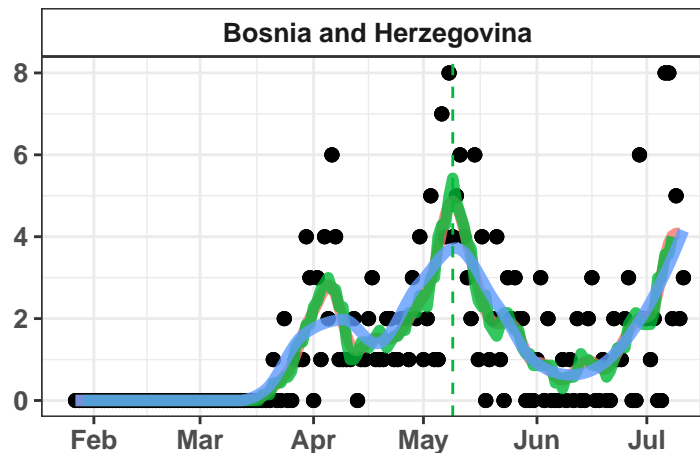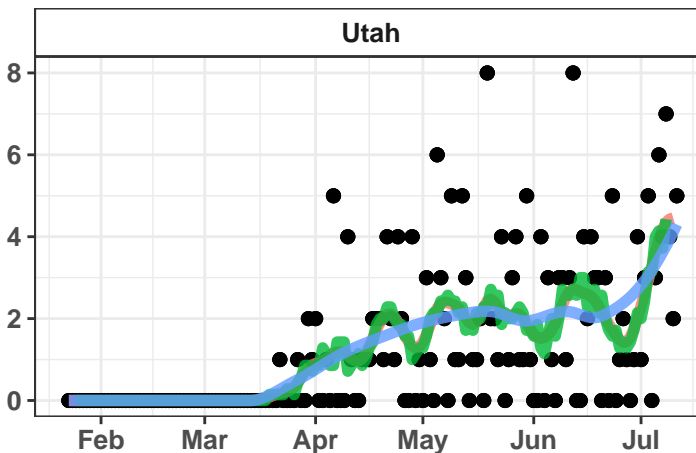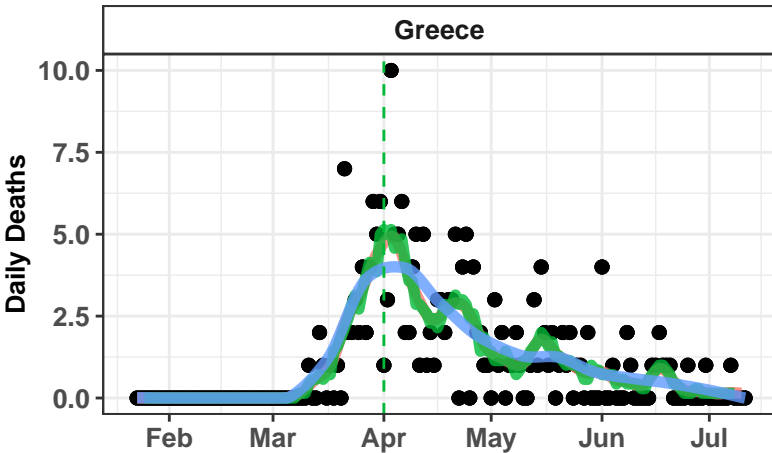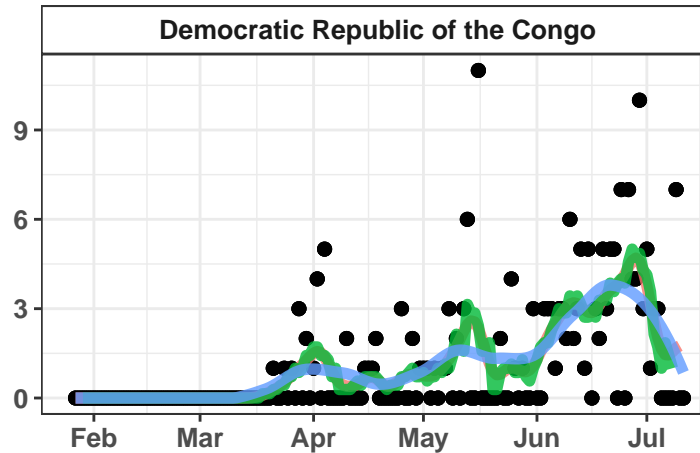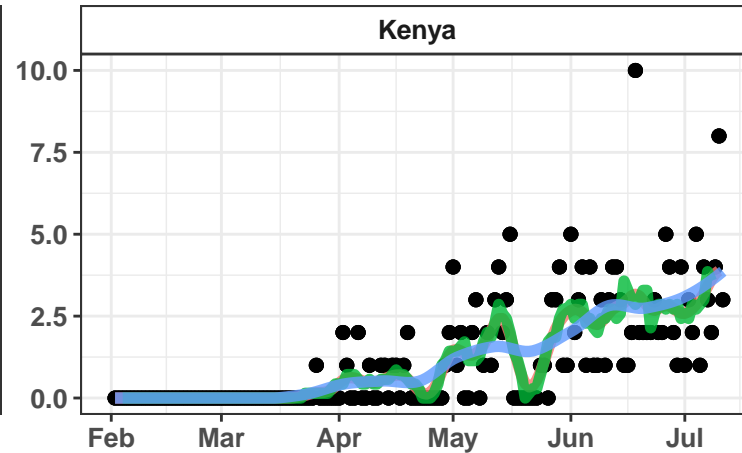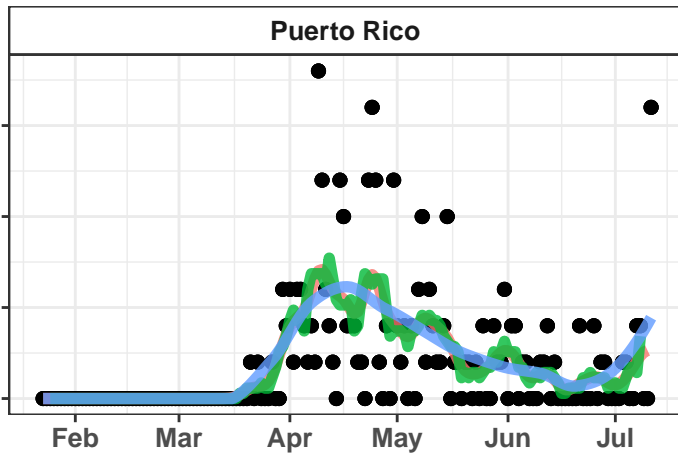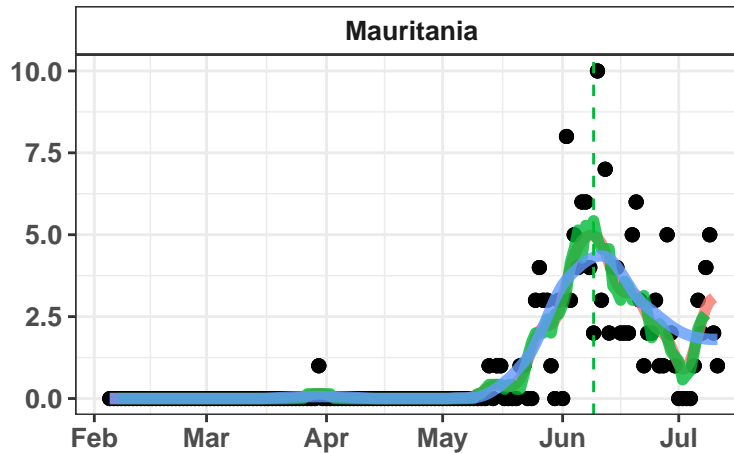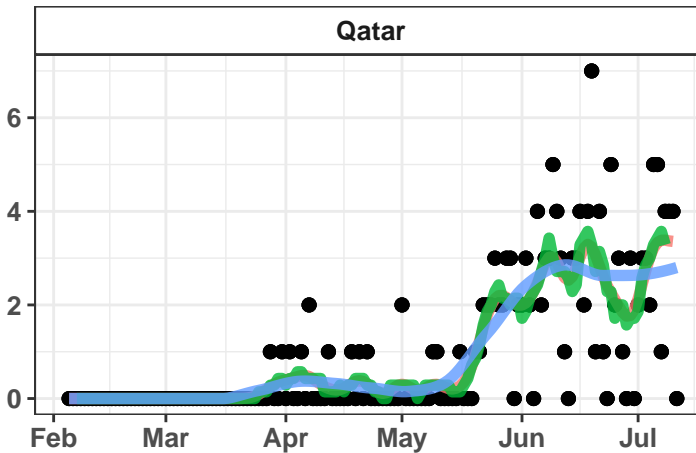

Month

3 X 10 Day Rolling Average 7 Day Rolling Average Loess

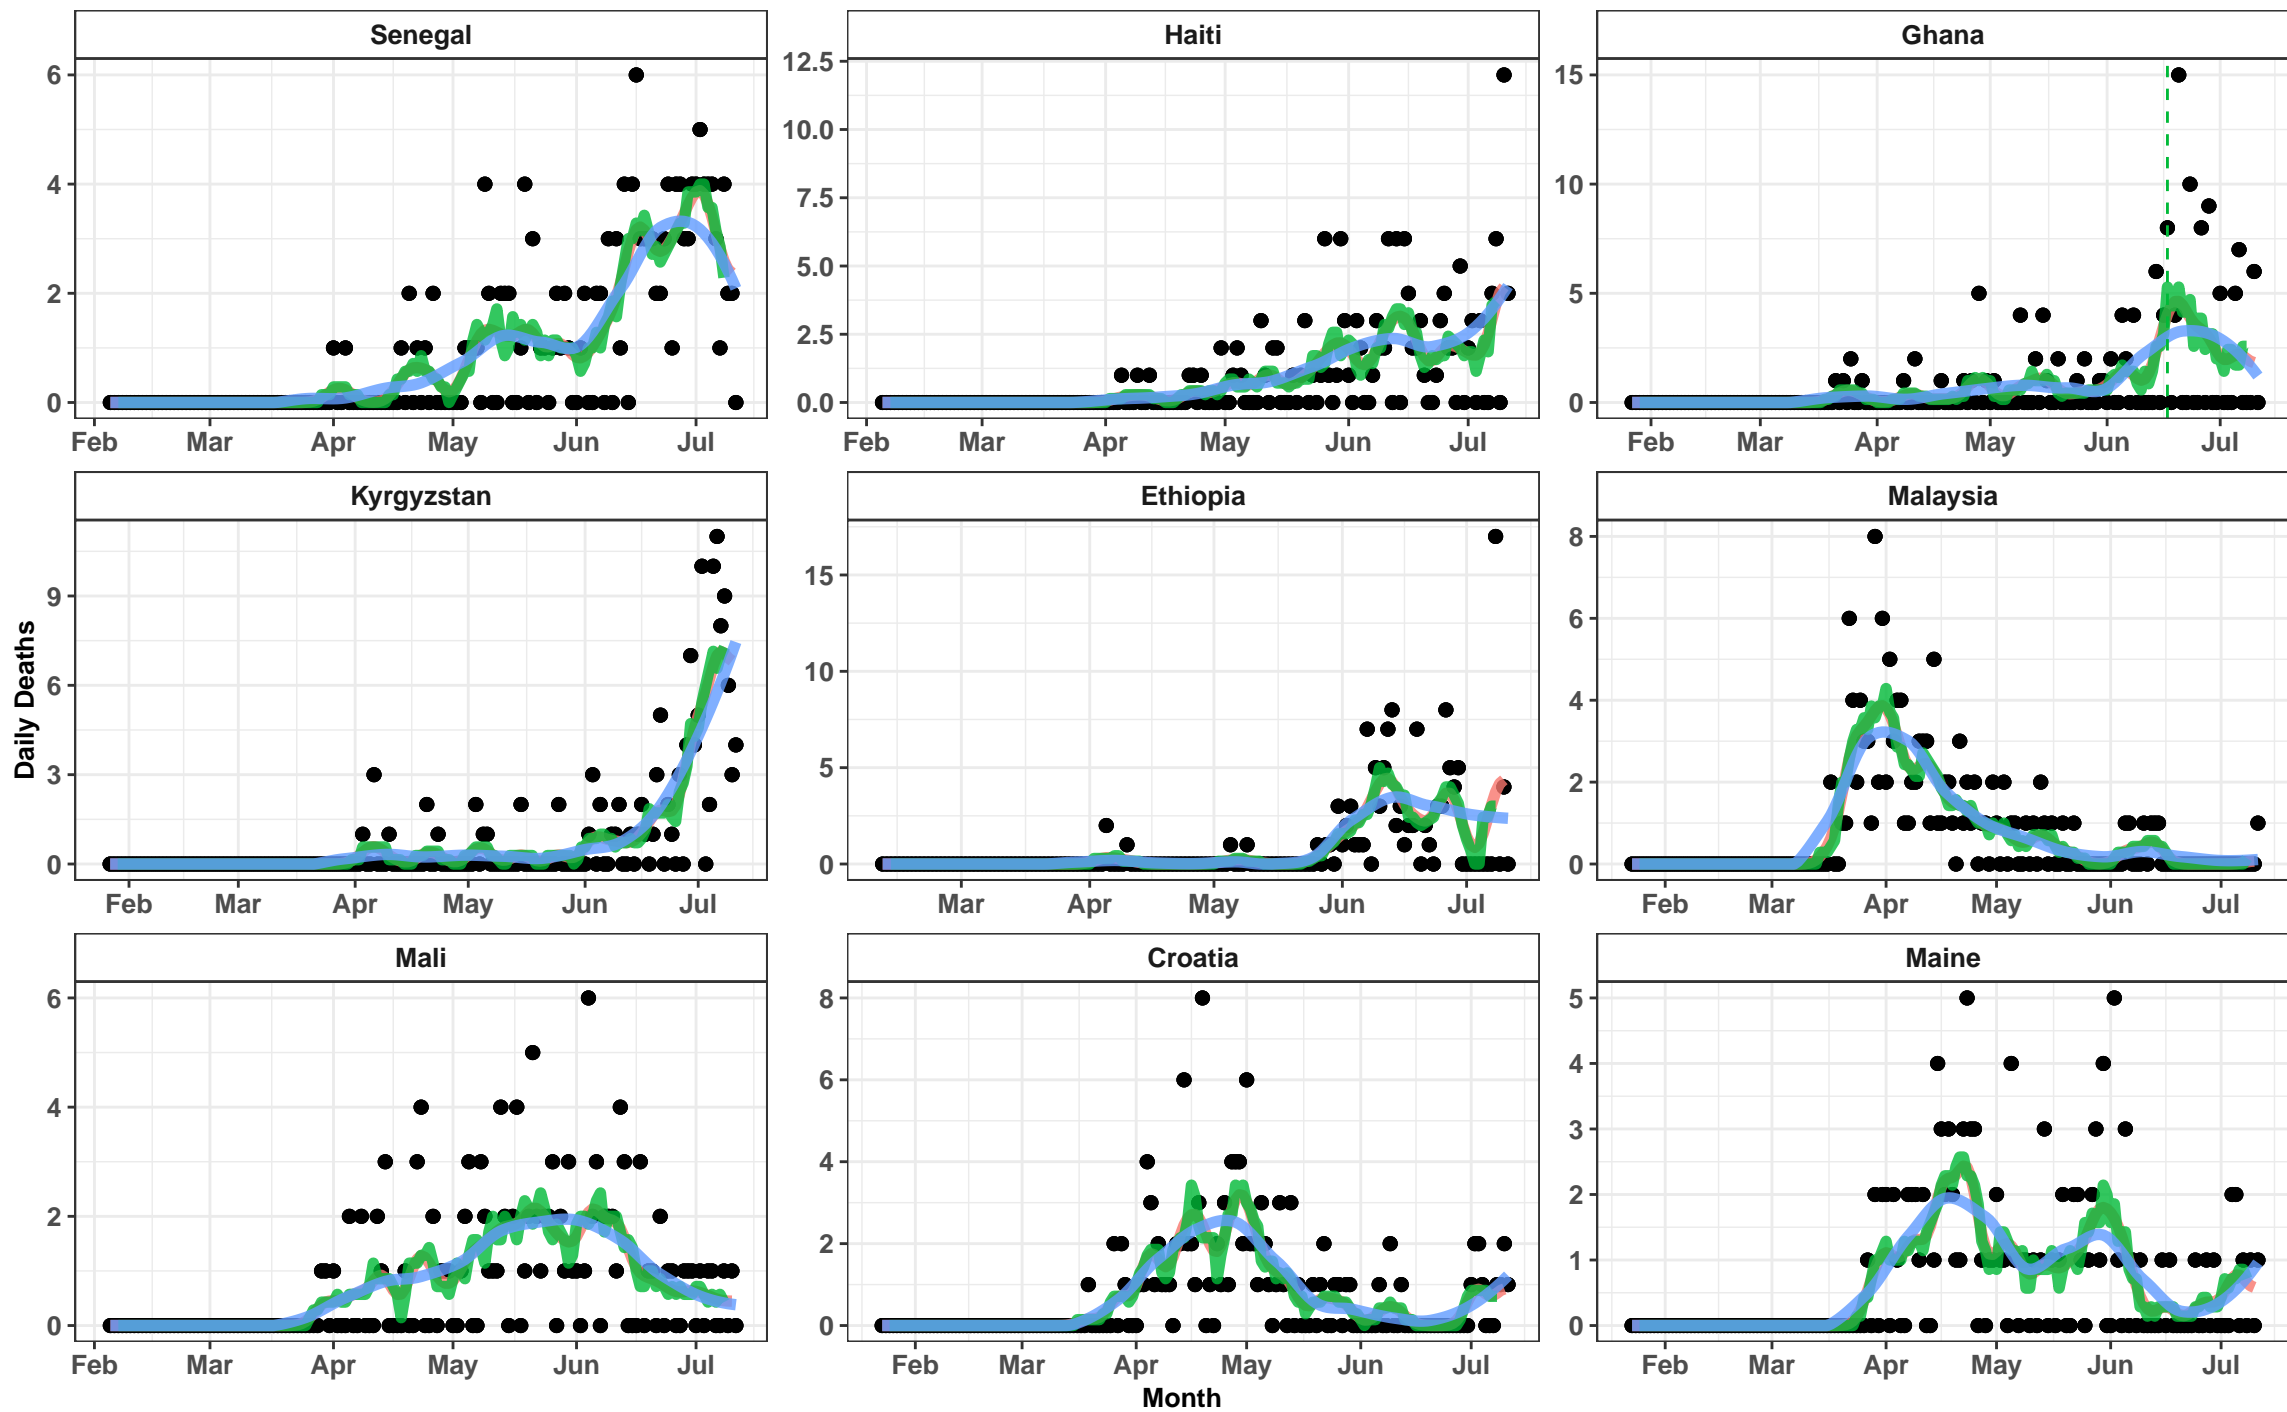

3 X 10 Day Rolling Average 7 Day Rolling Average Loess

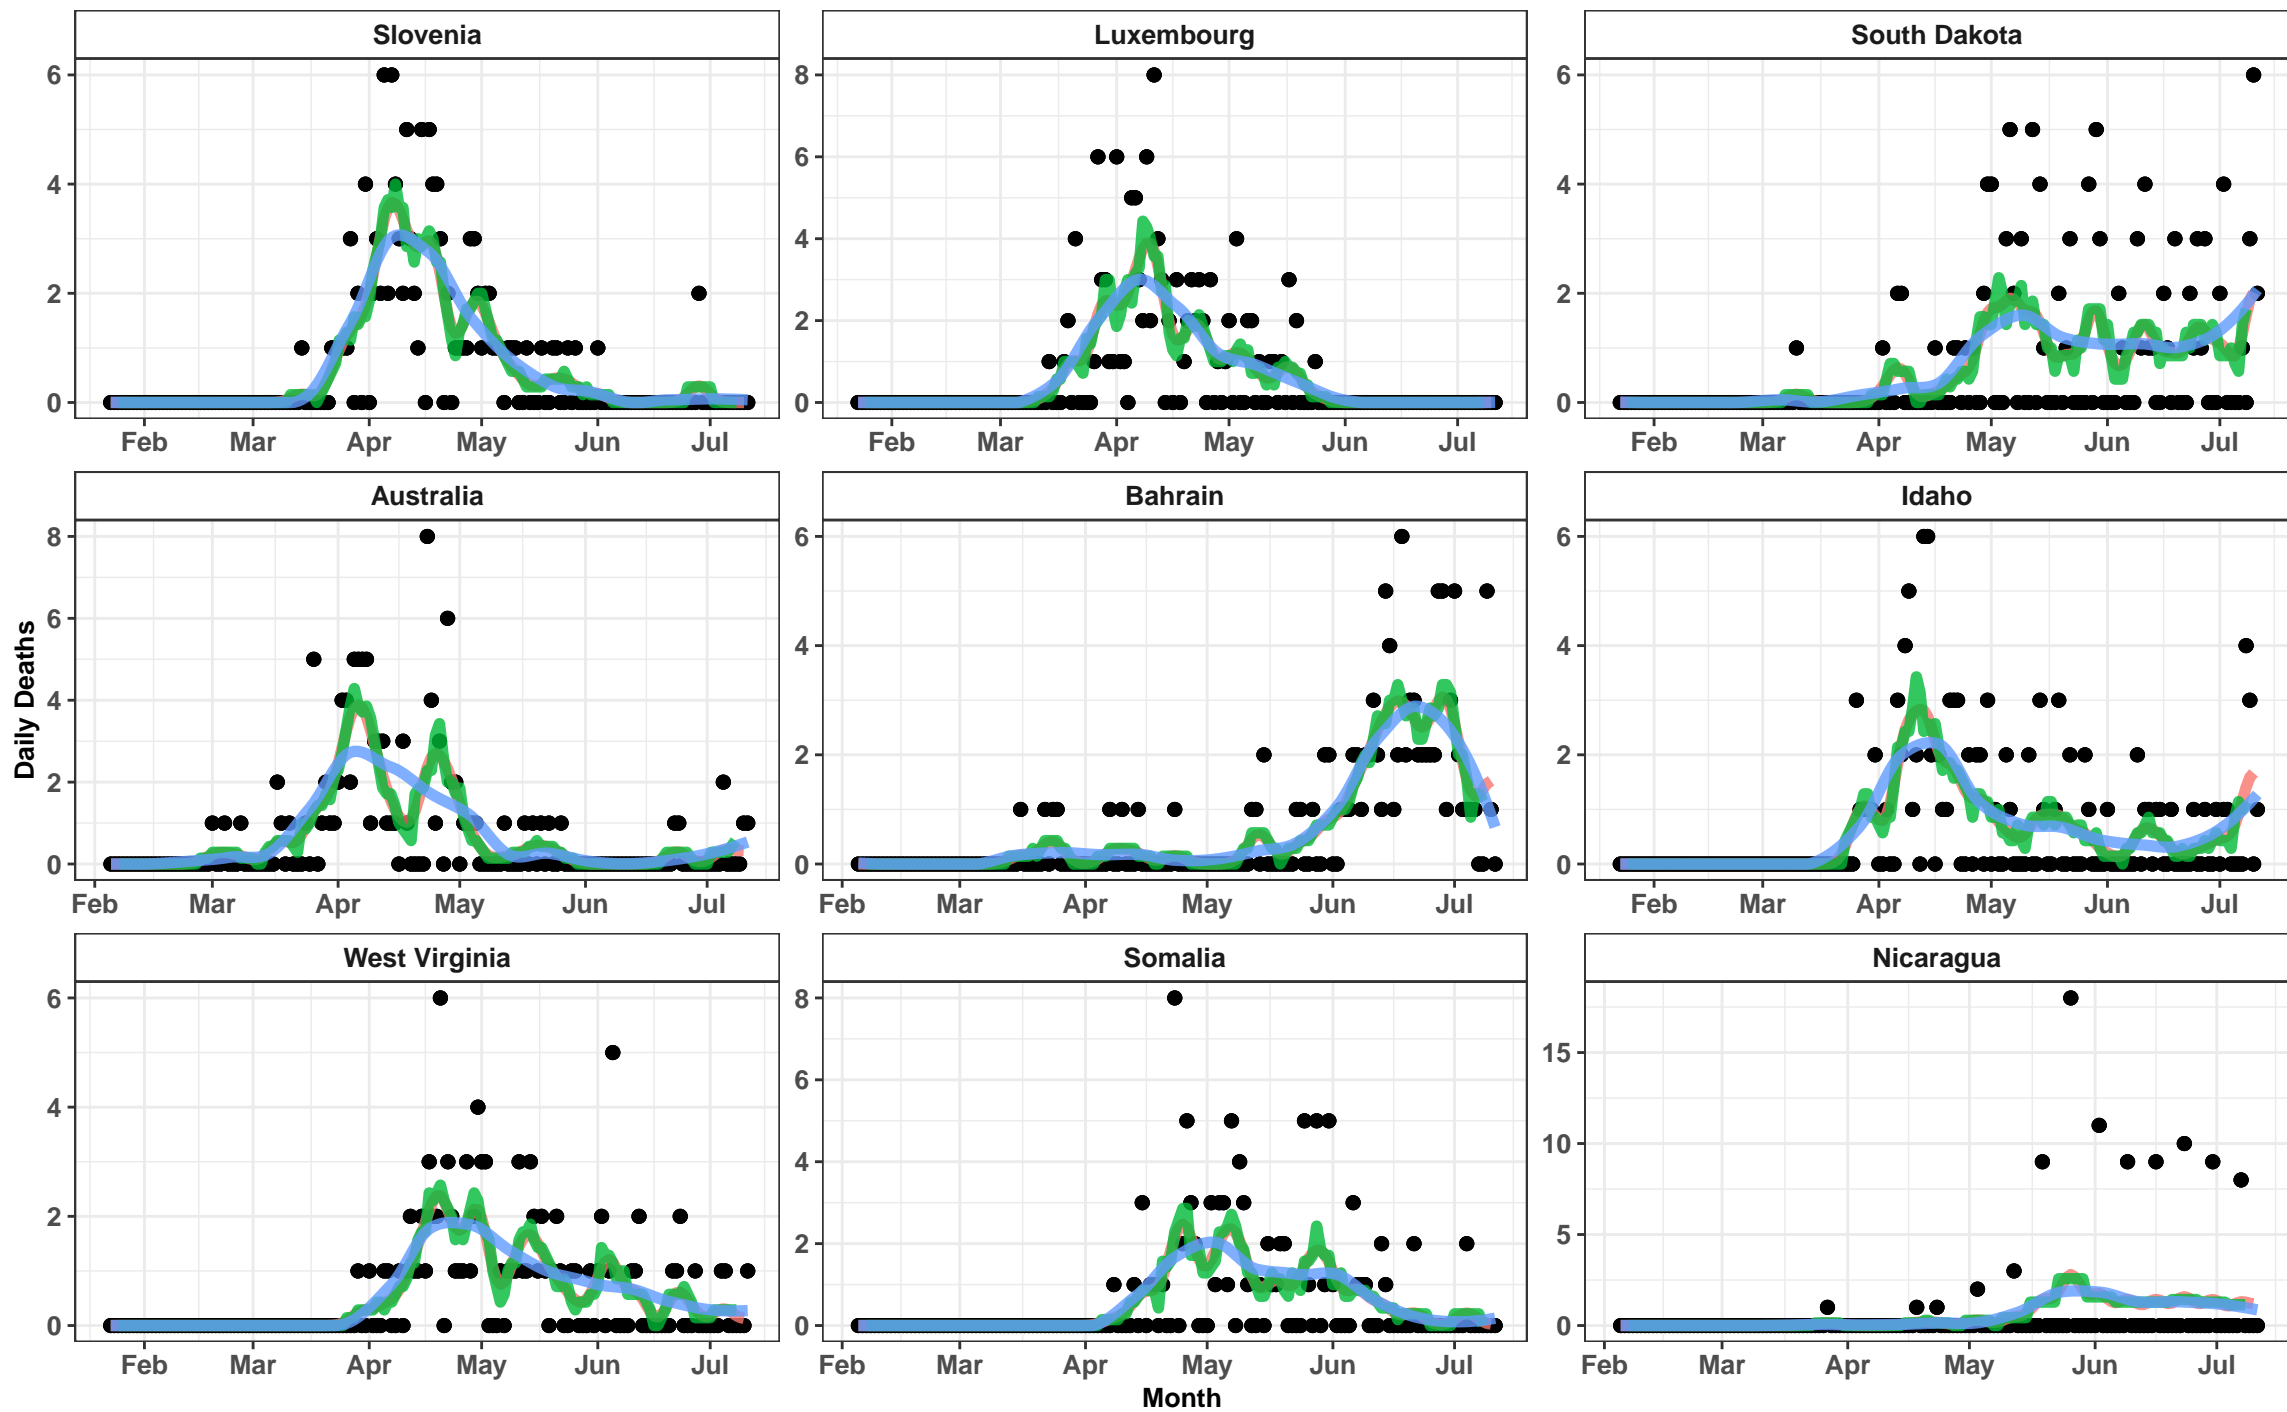

3 X 10 Day Rolling Average 7 Day Rolling Average Loess

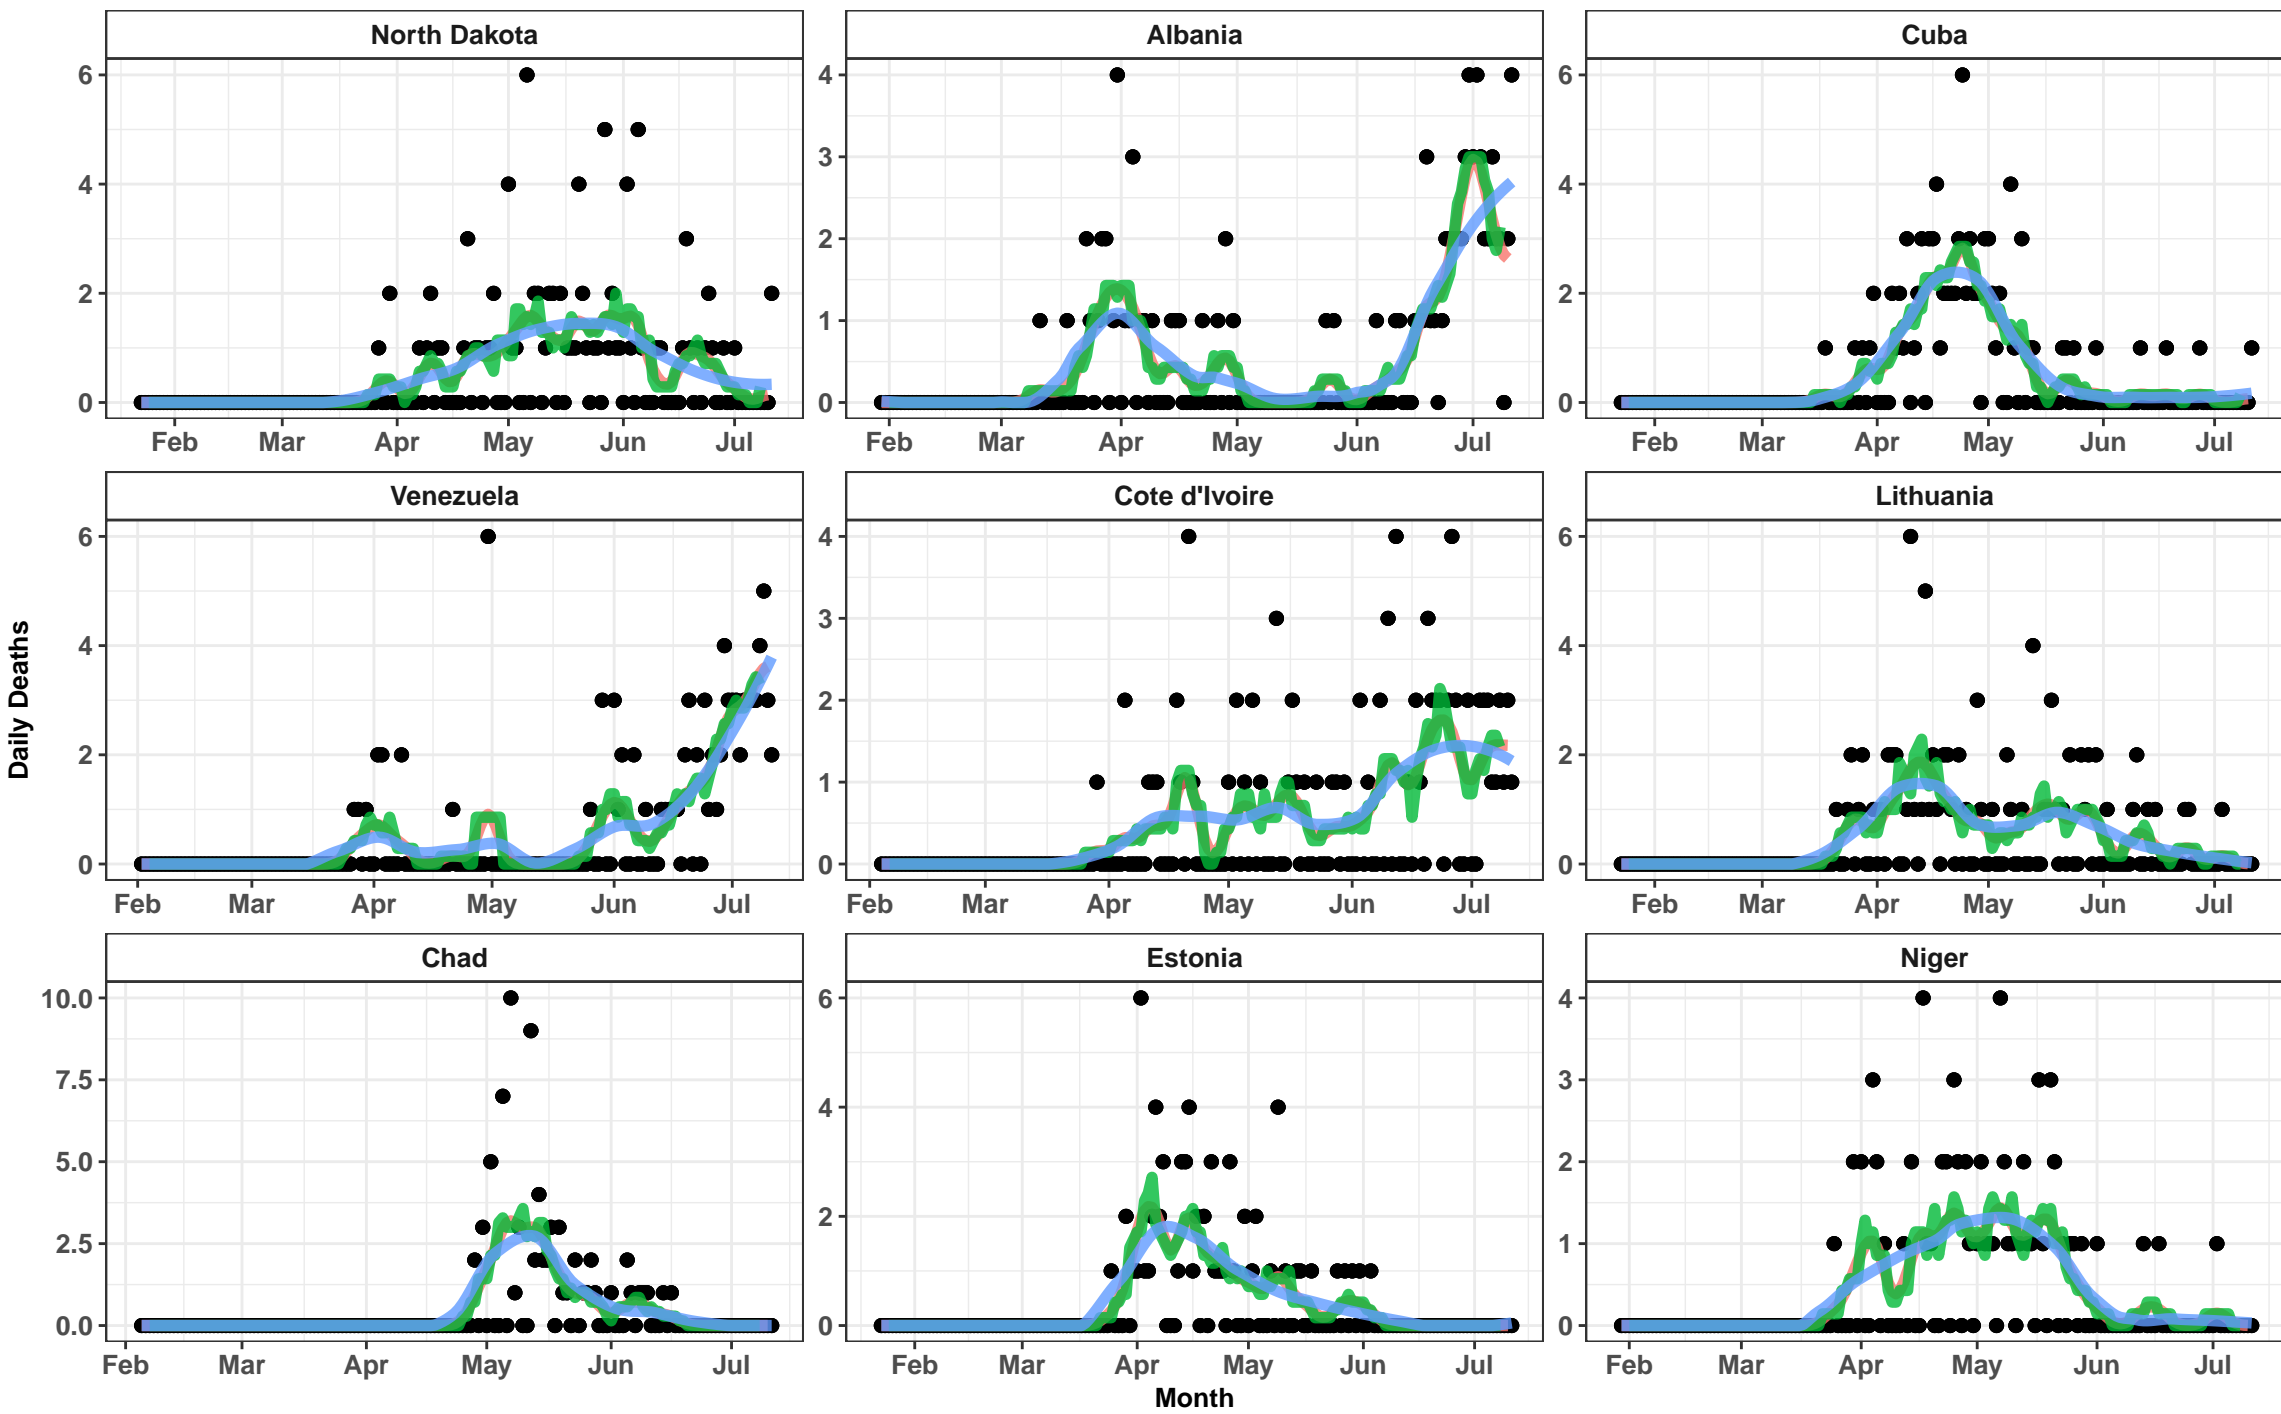



3 X 10 Day Rolling Average 7 Day Rolling Average Loess

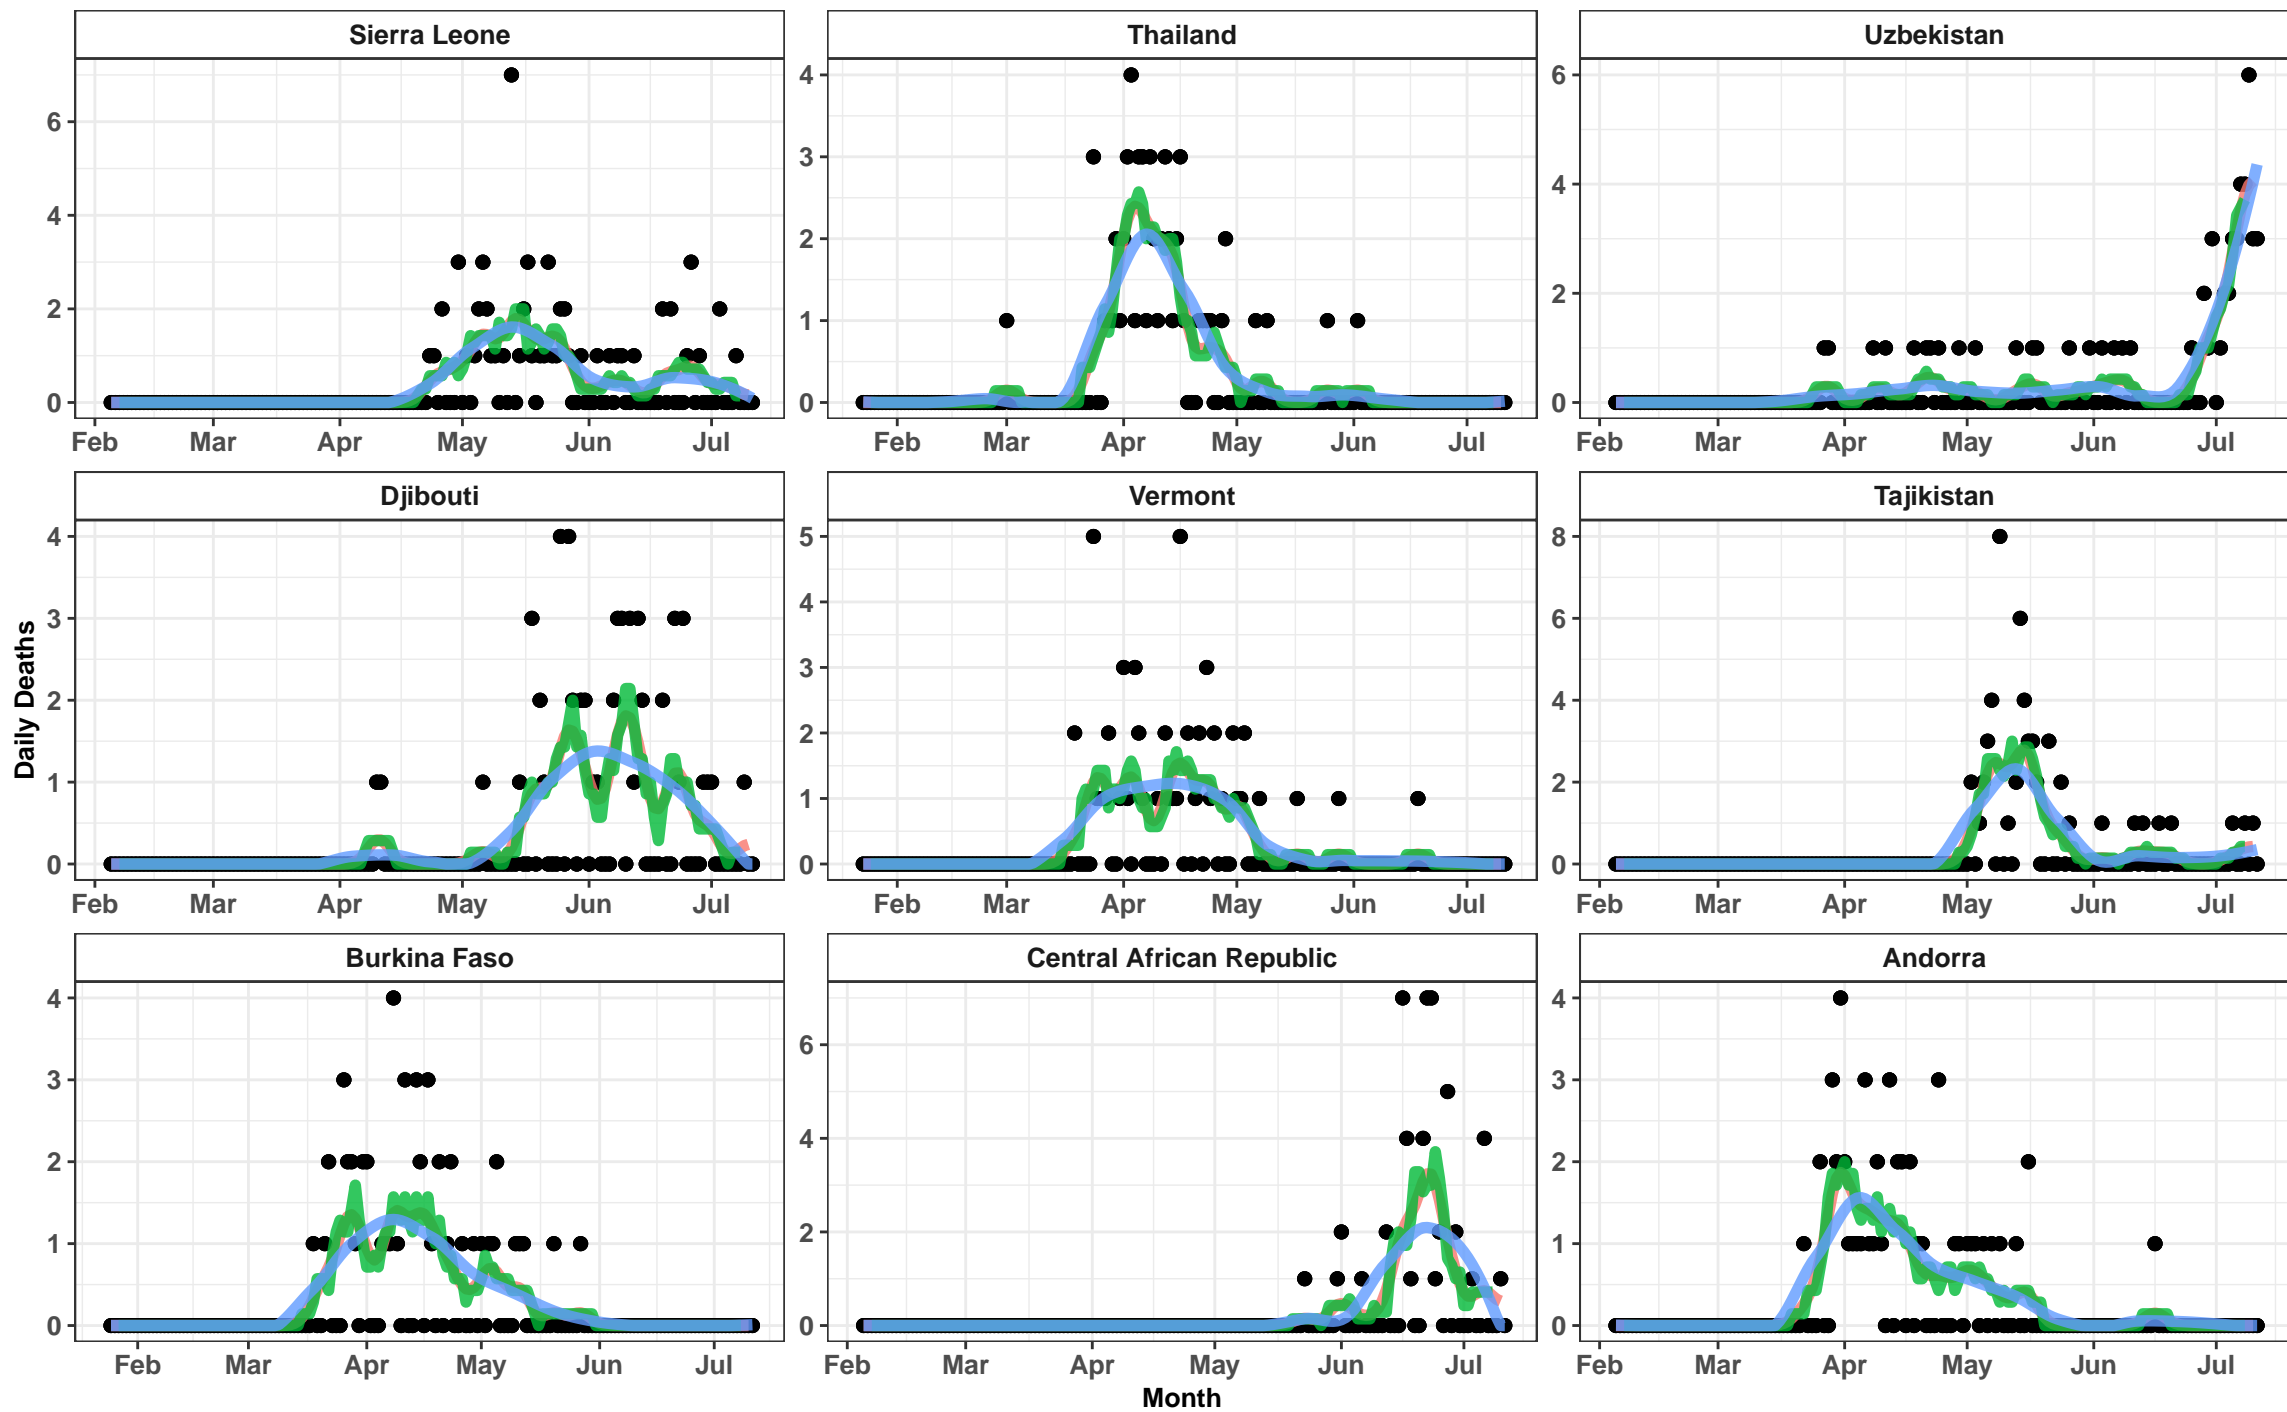

3 X 10 Day Rolling Average 7 Day Rolling Average Loess

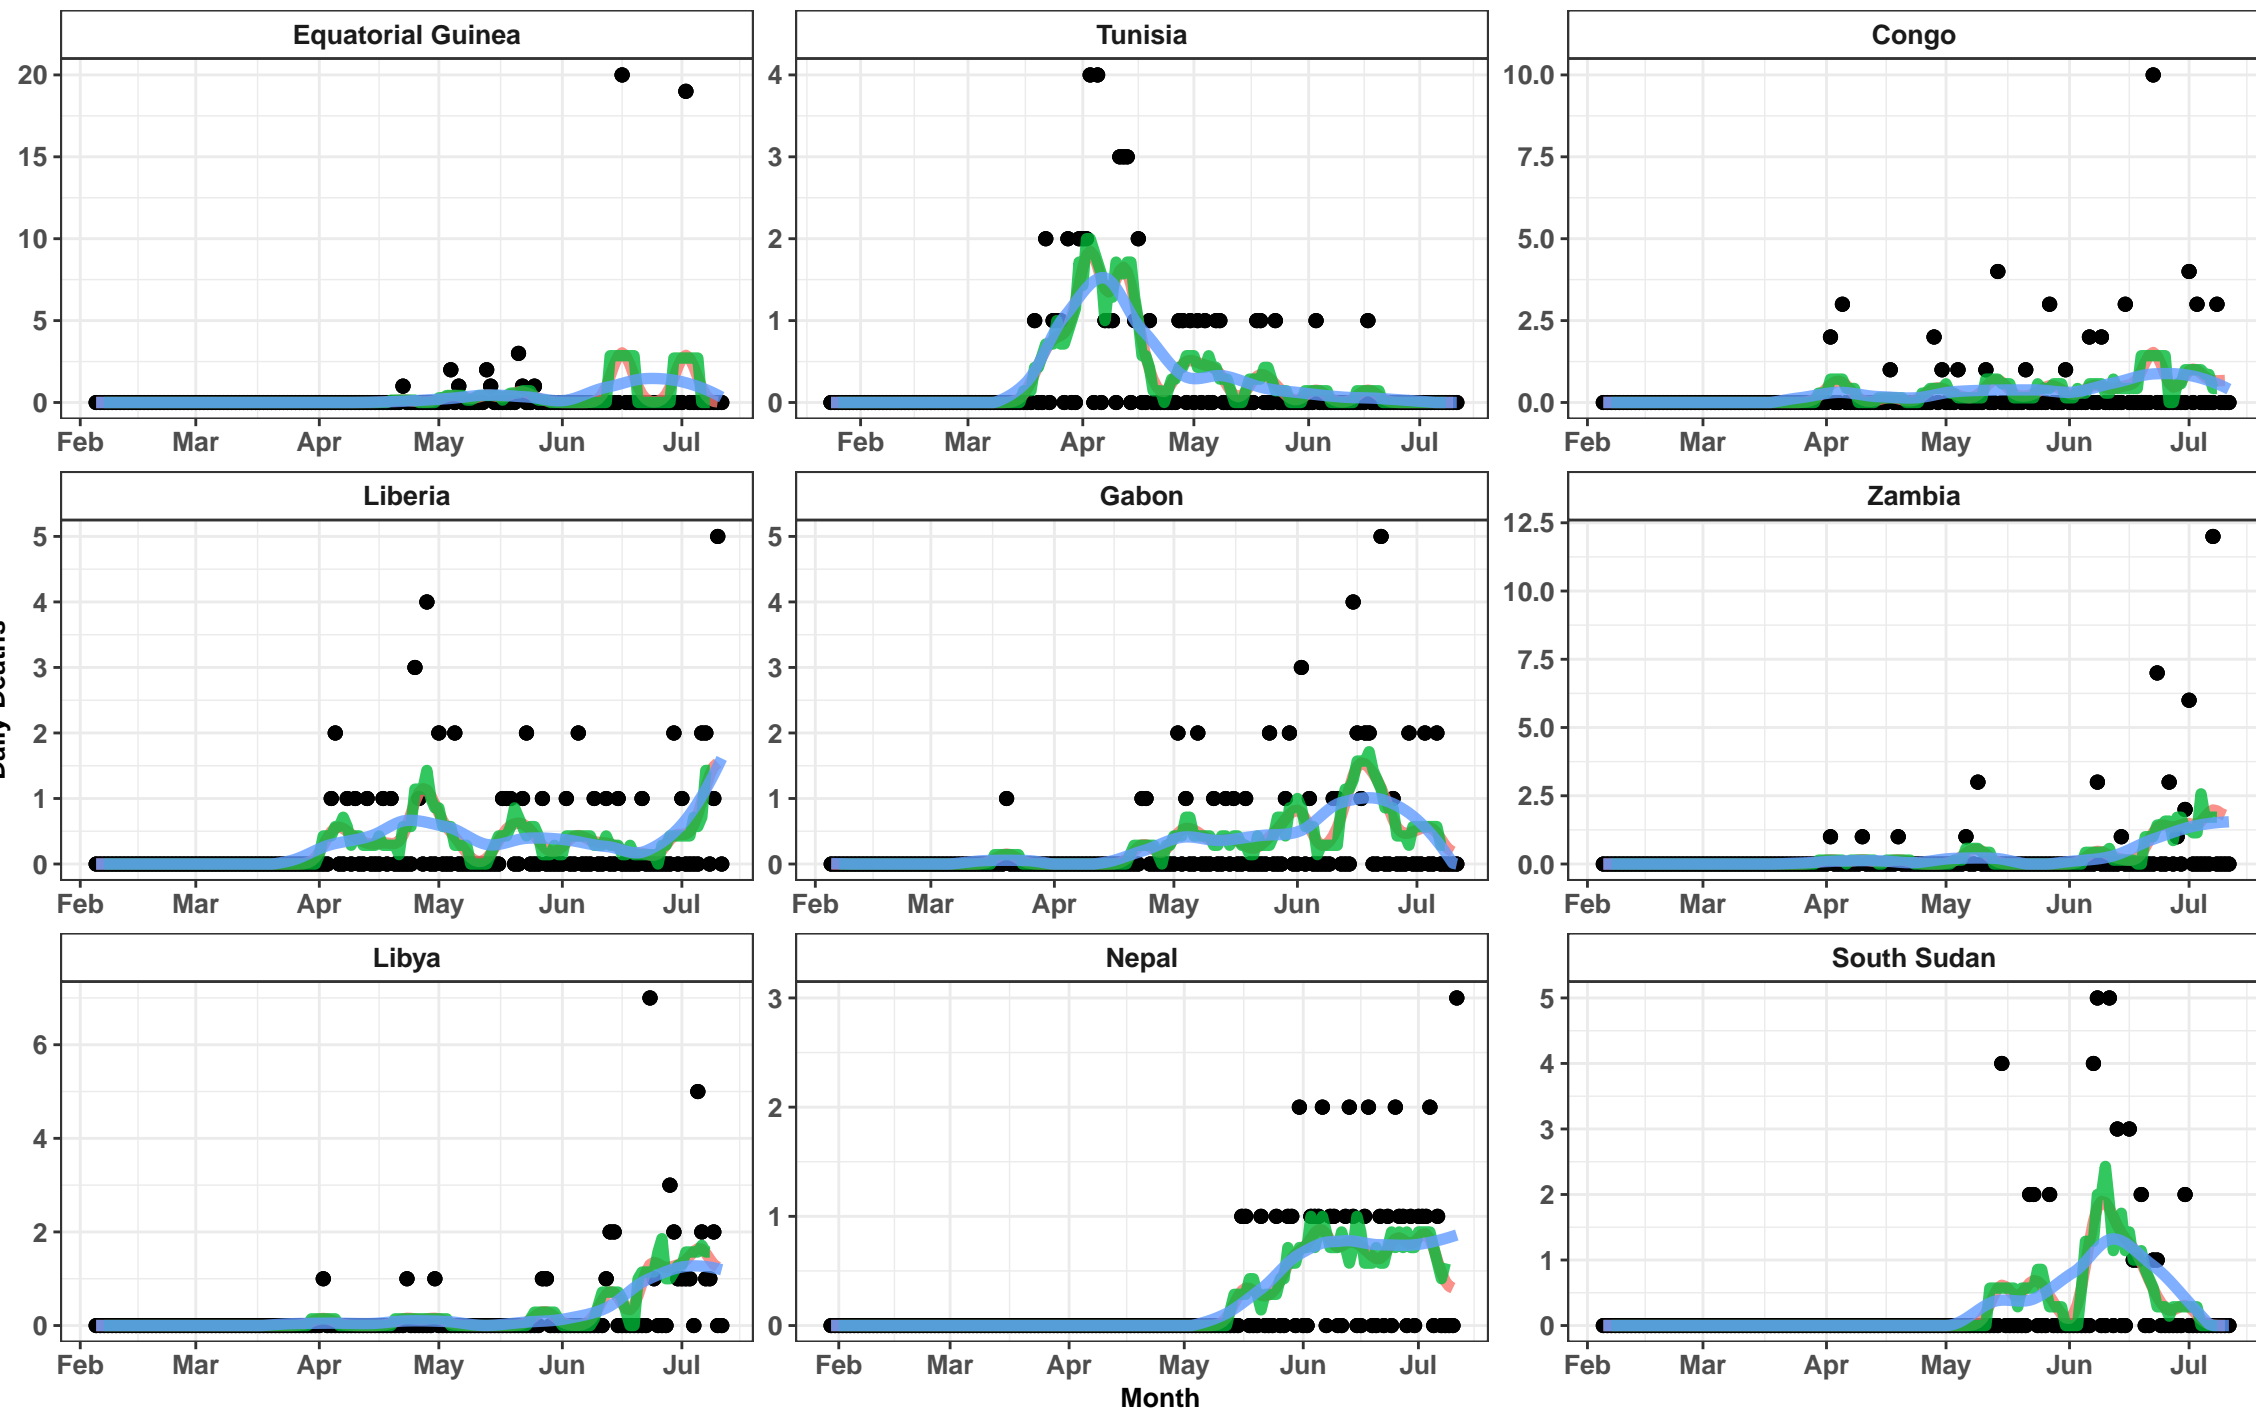

3 X 10 Day Rolling Average 7 Day Rolling Average Loess

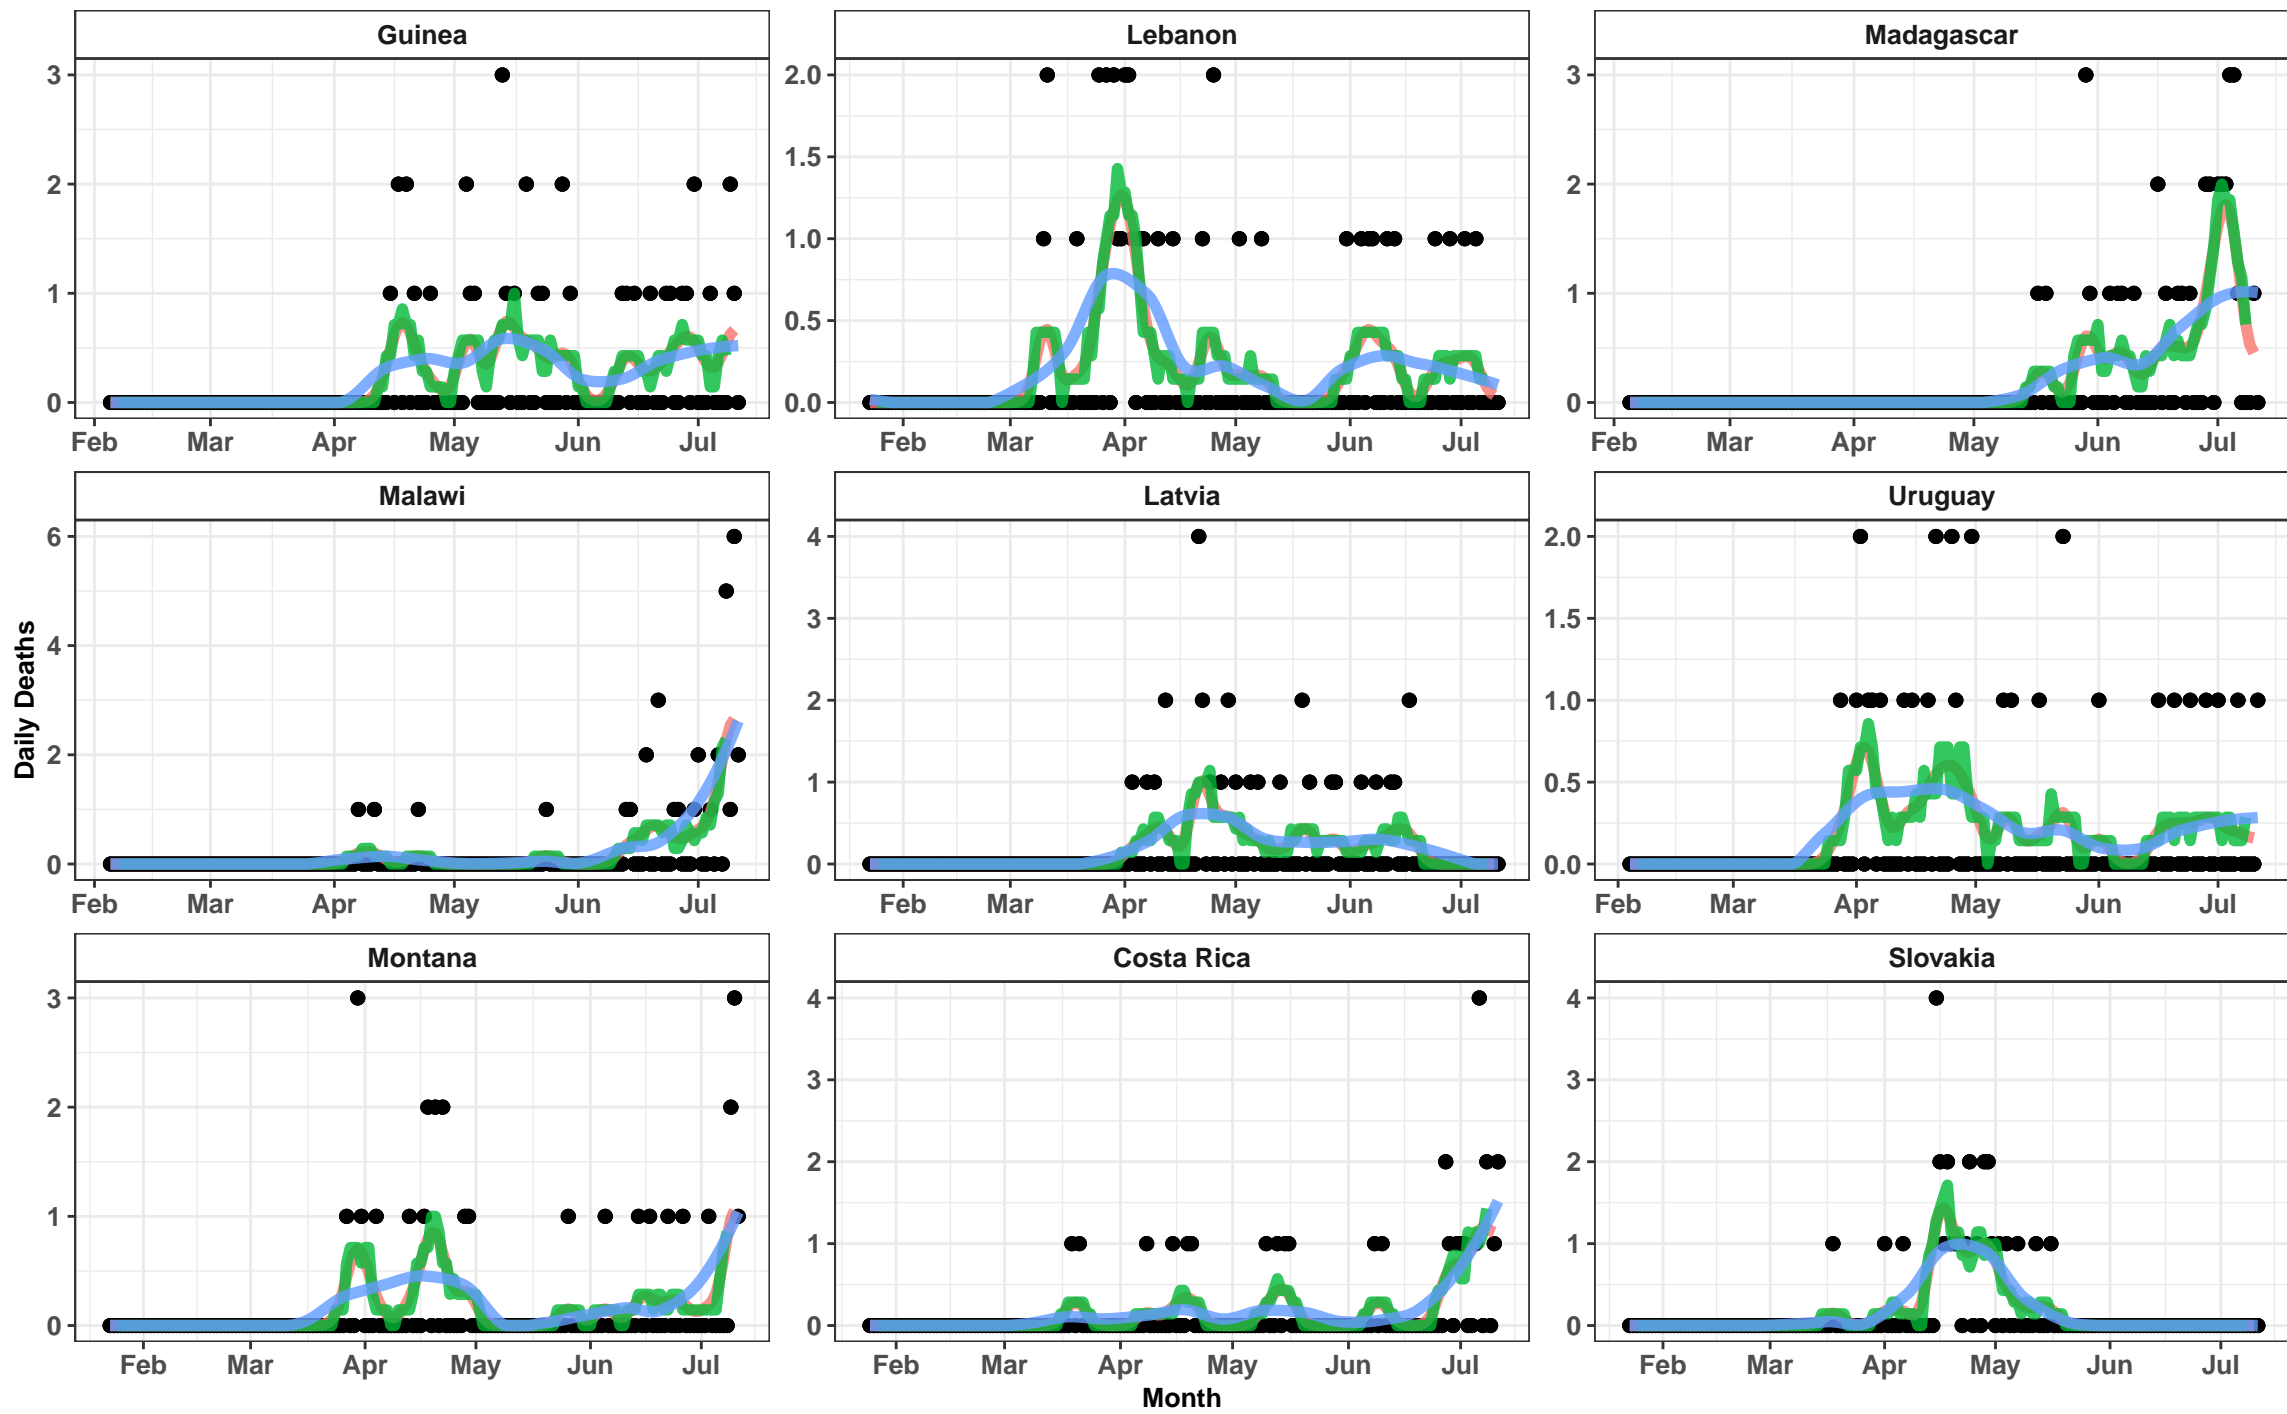

3 X 10 Day Rolling Average 7 Day Rolling Average Loess

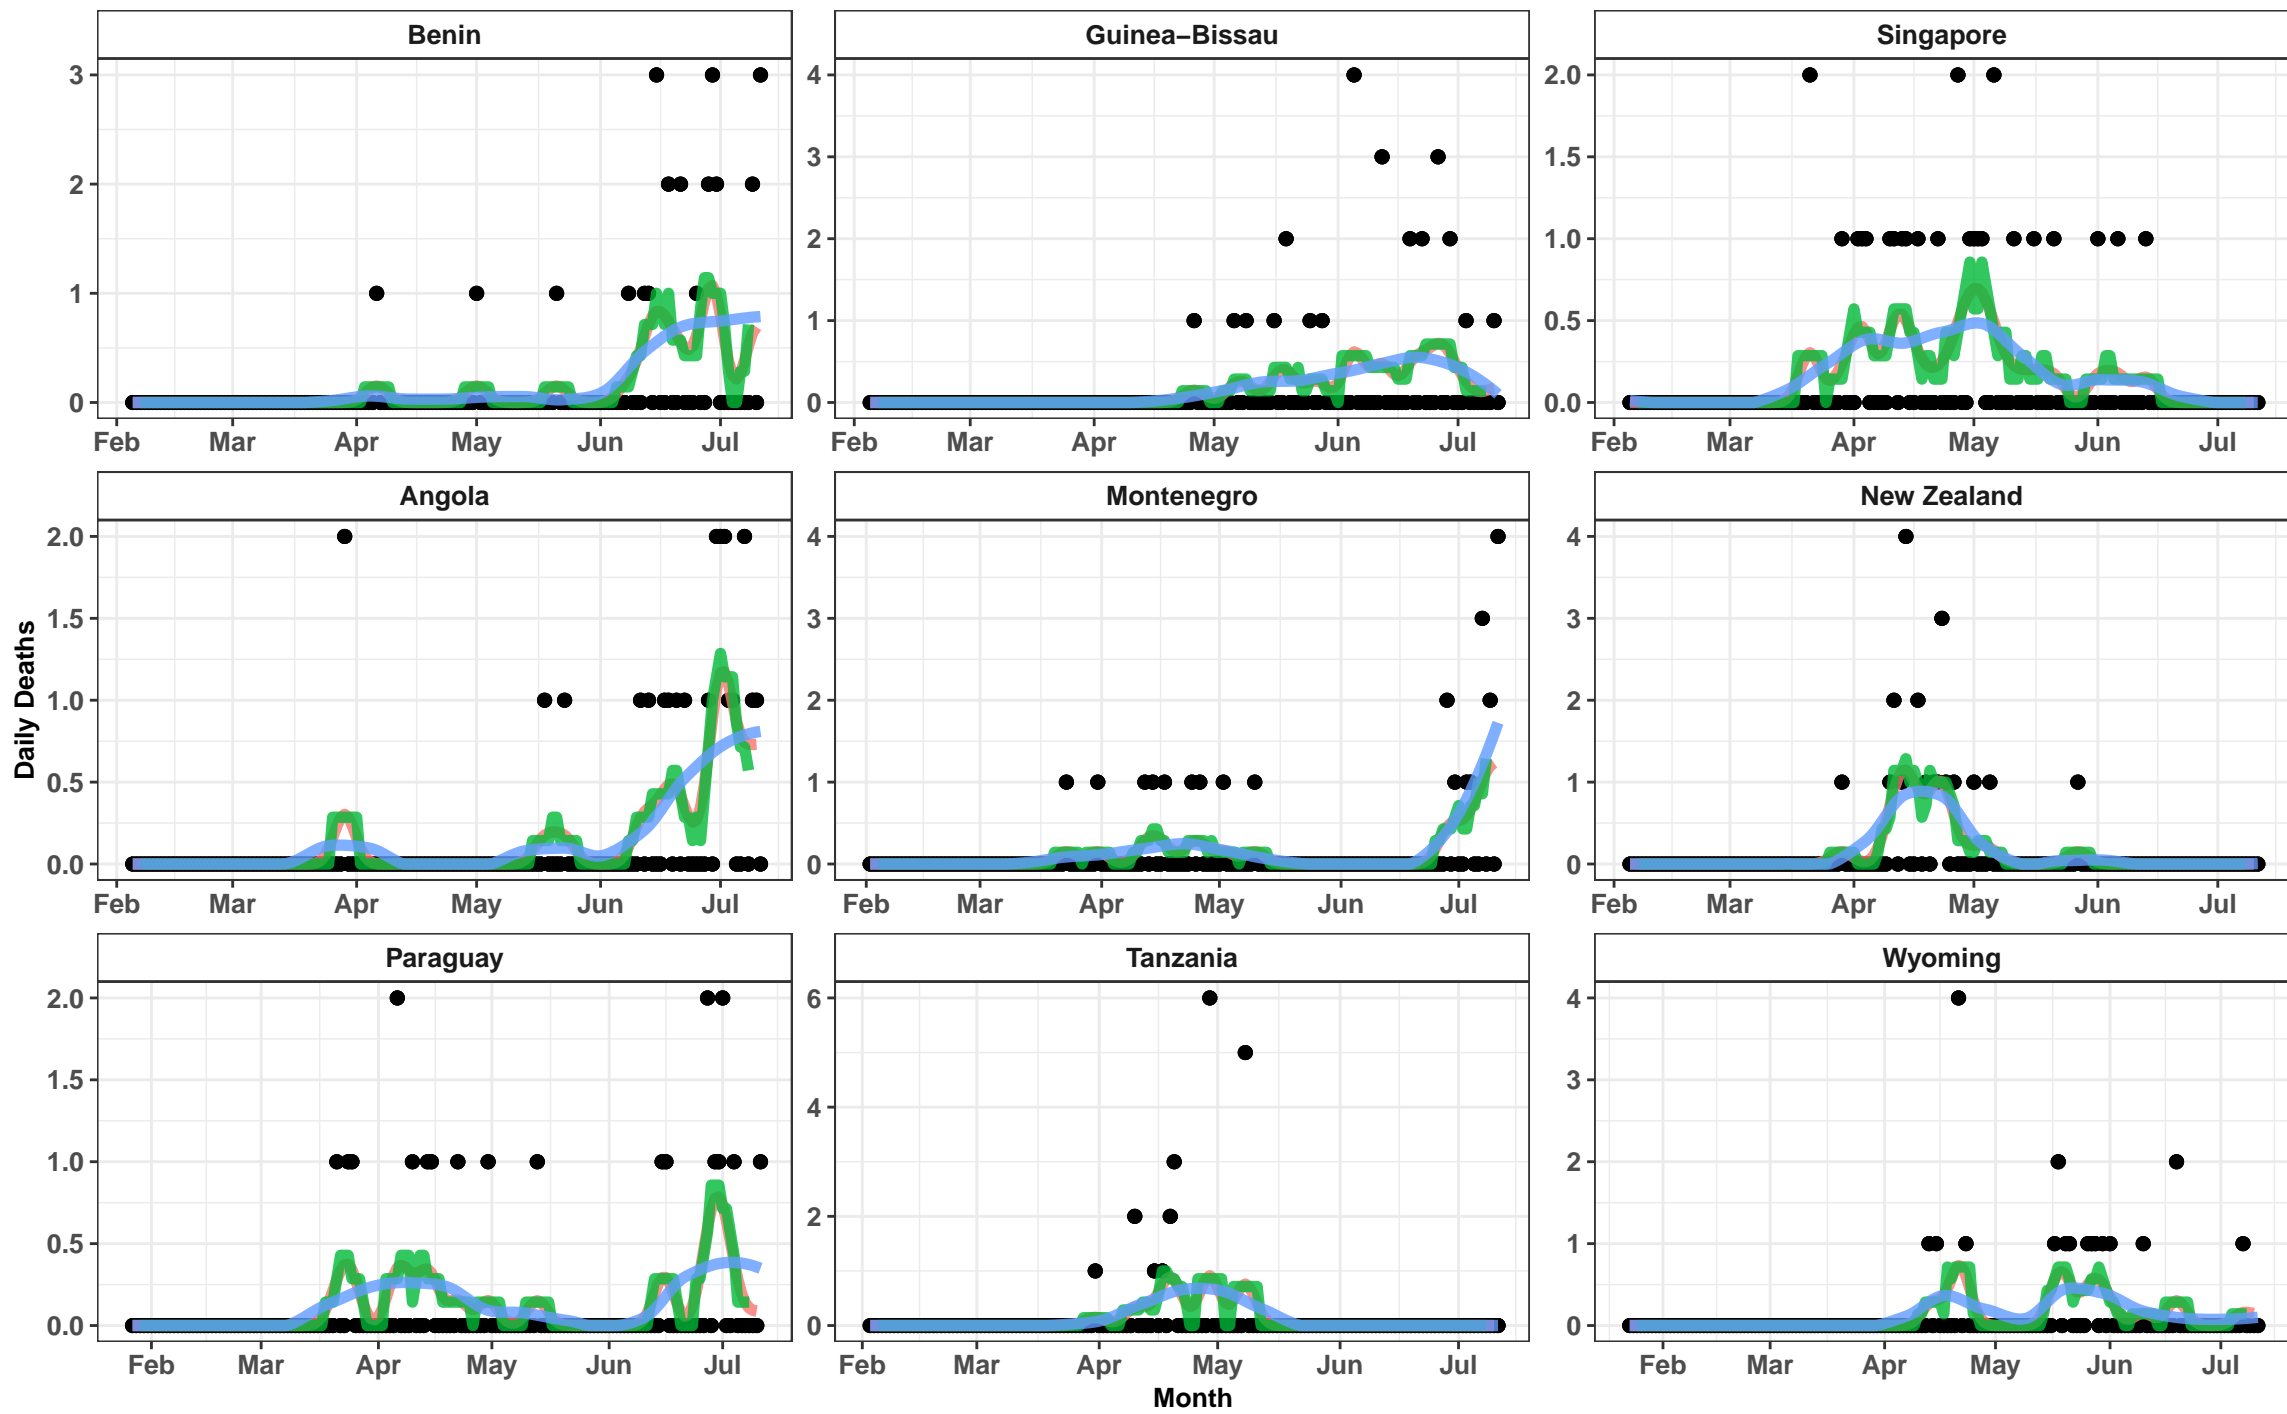

3 X 10 Day Rolling Average 7 Day Rolling Average Loess

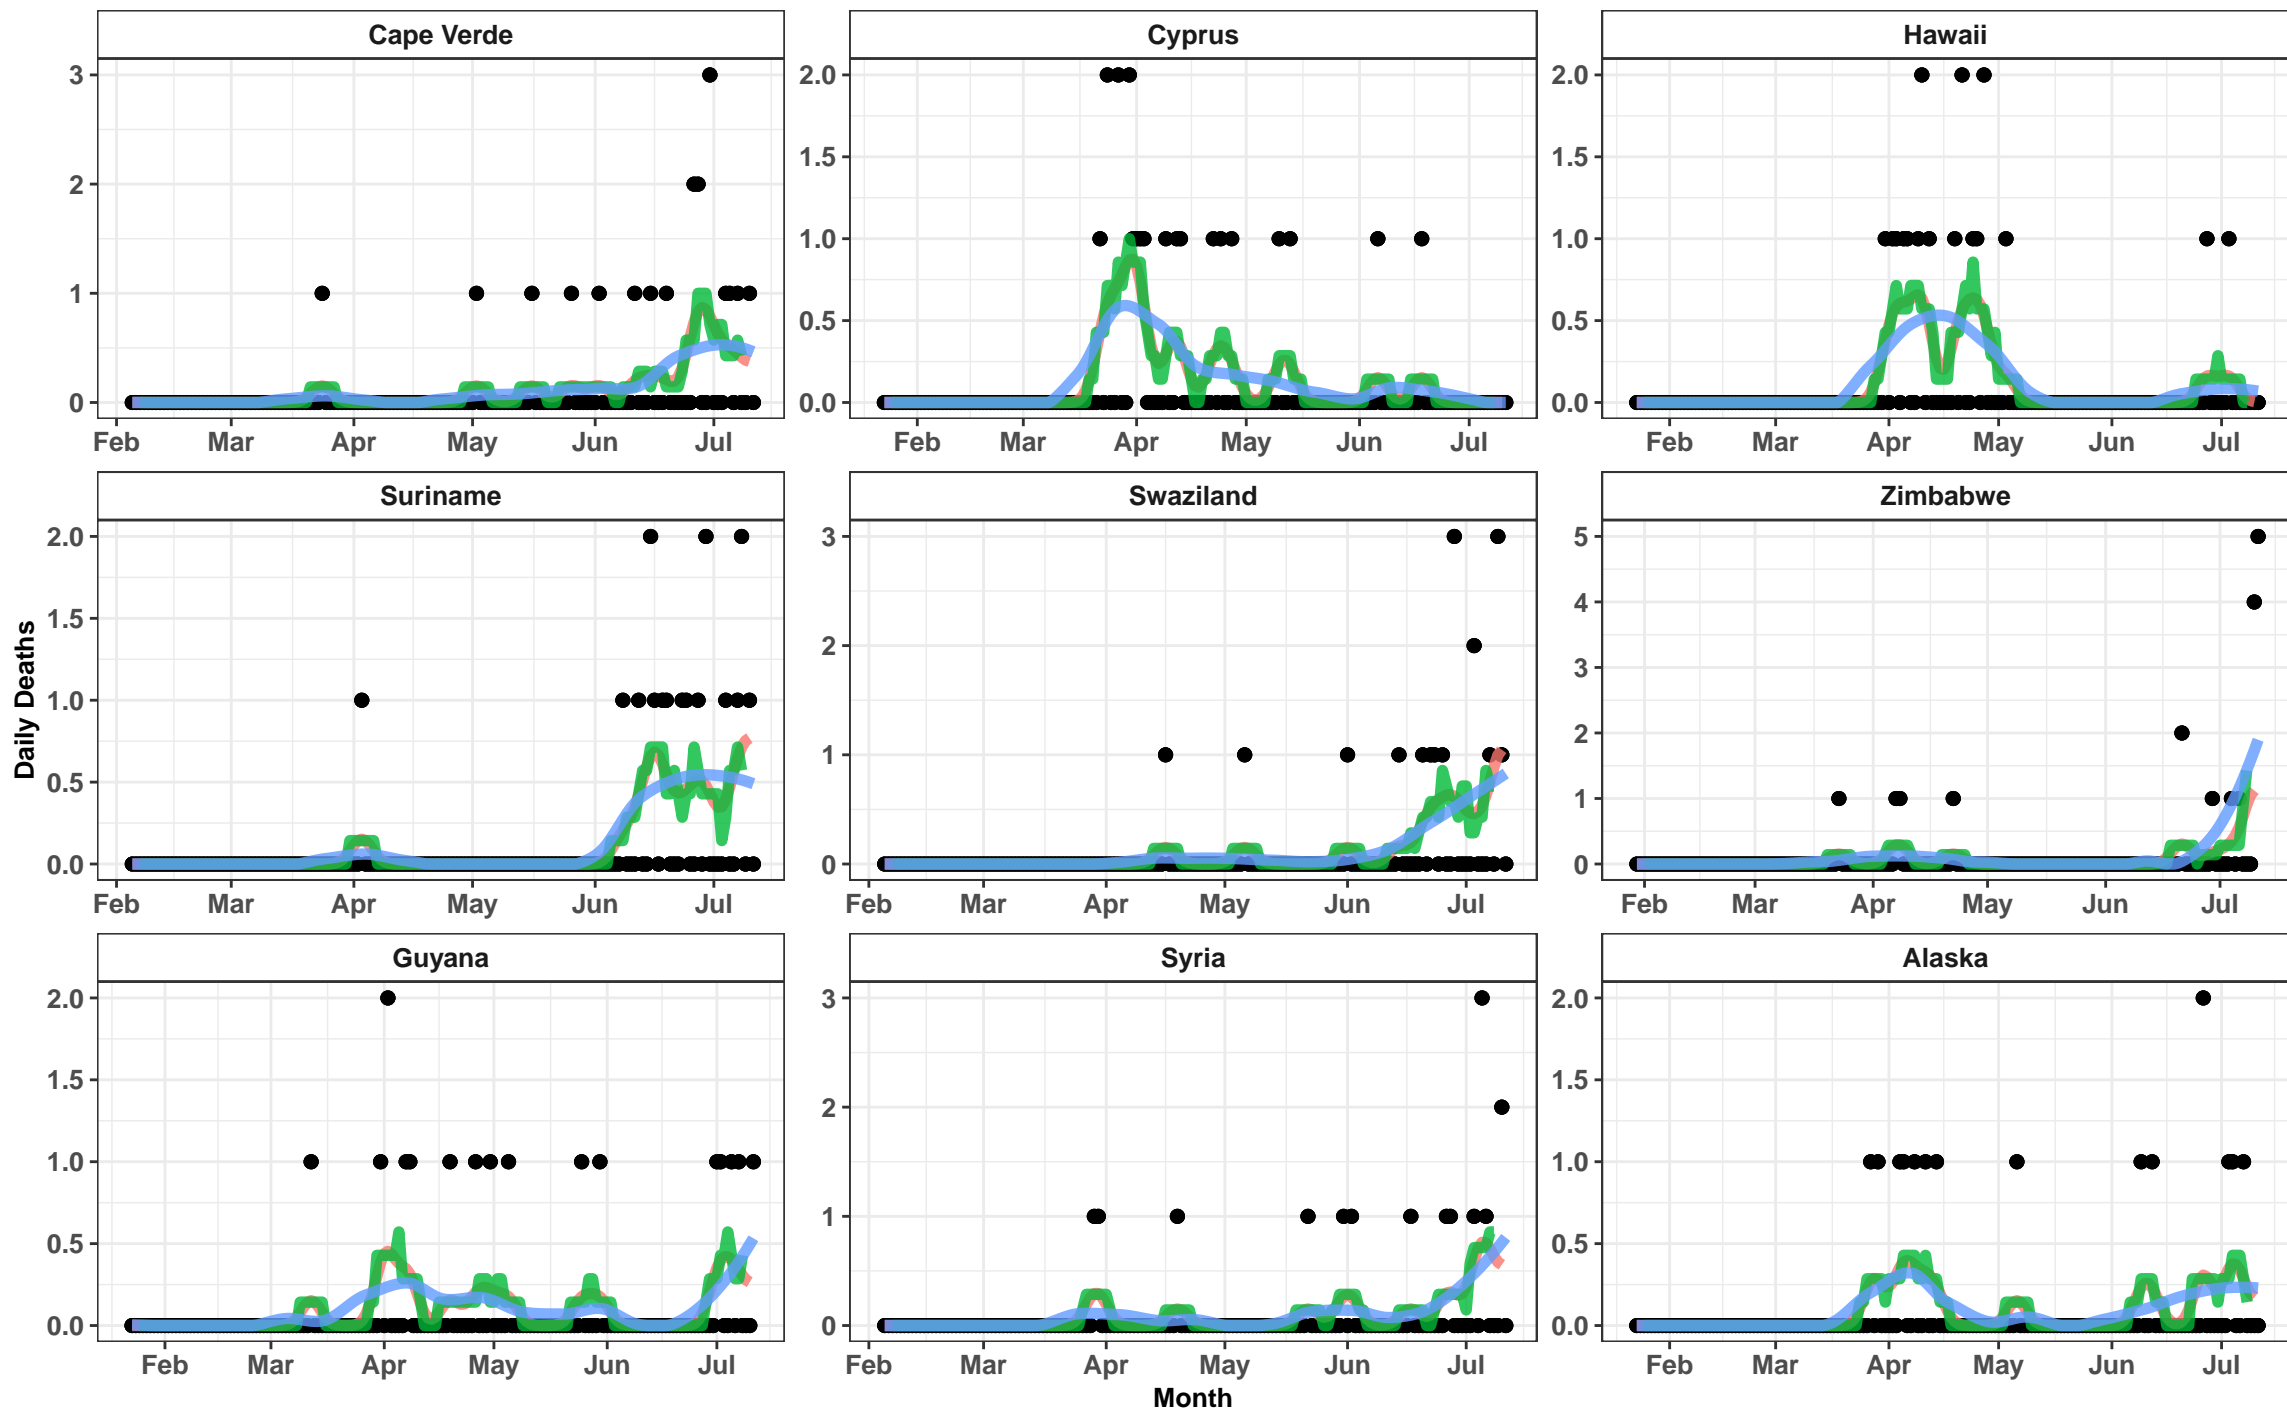

3 X 10 Day Rolling Average 7 Day Rolling Average Loess

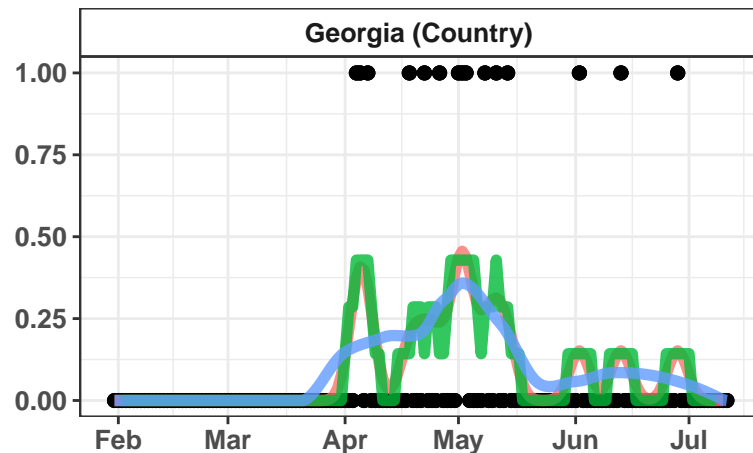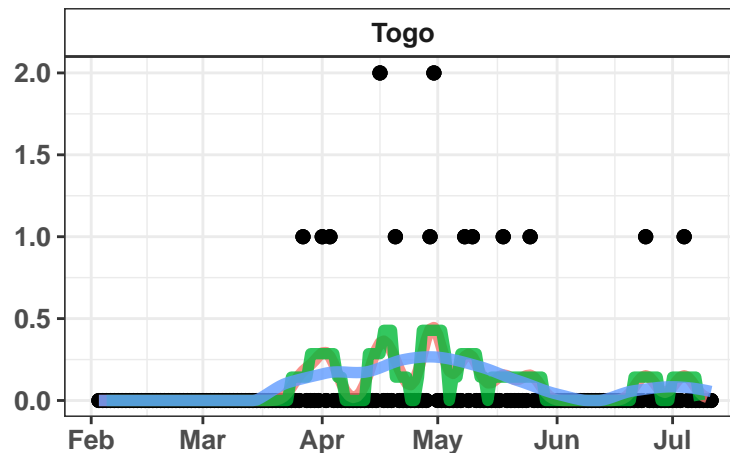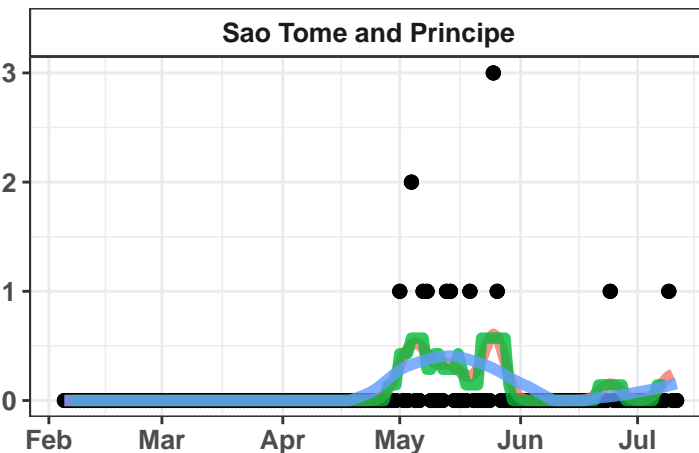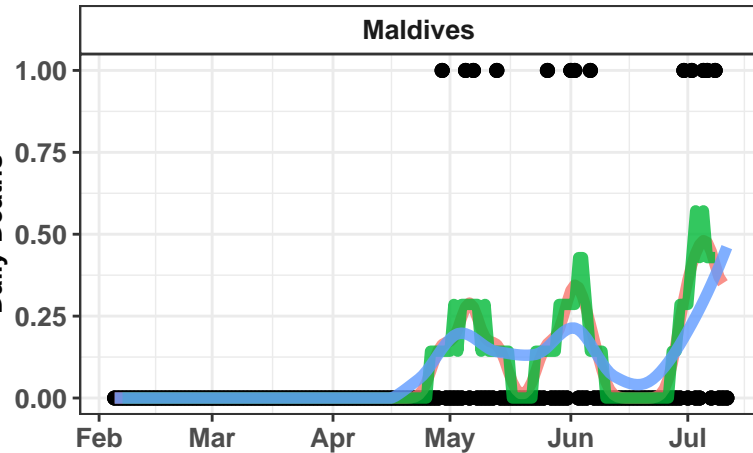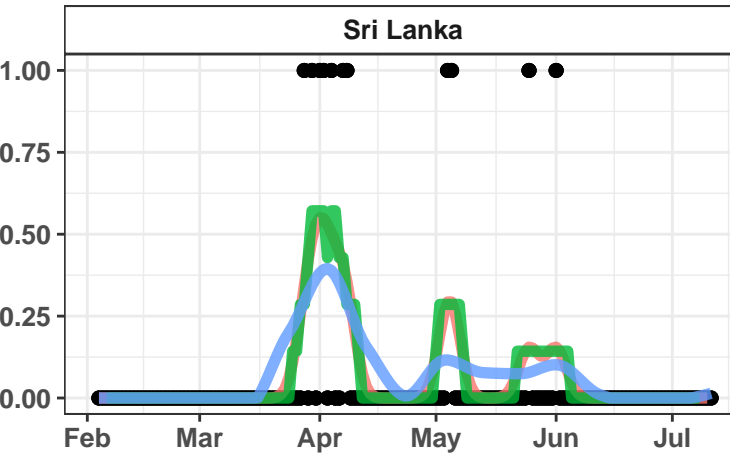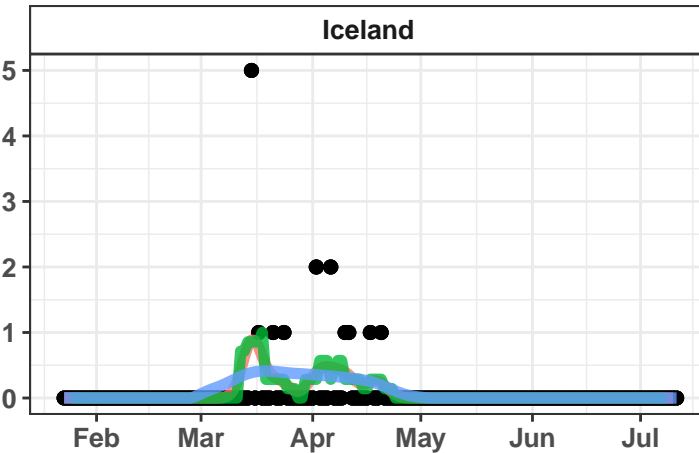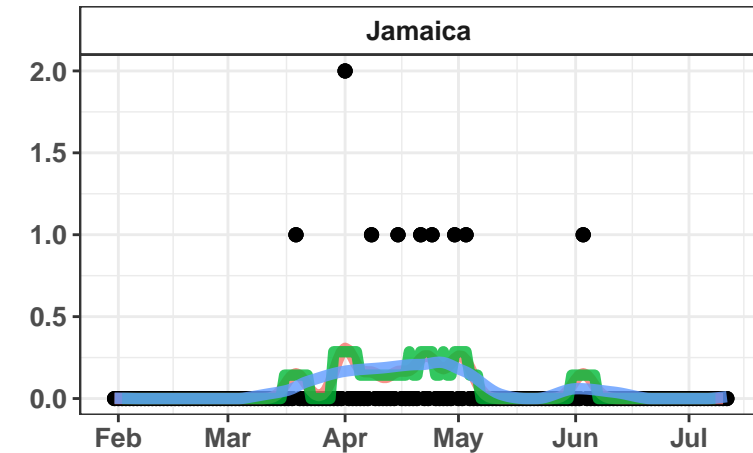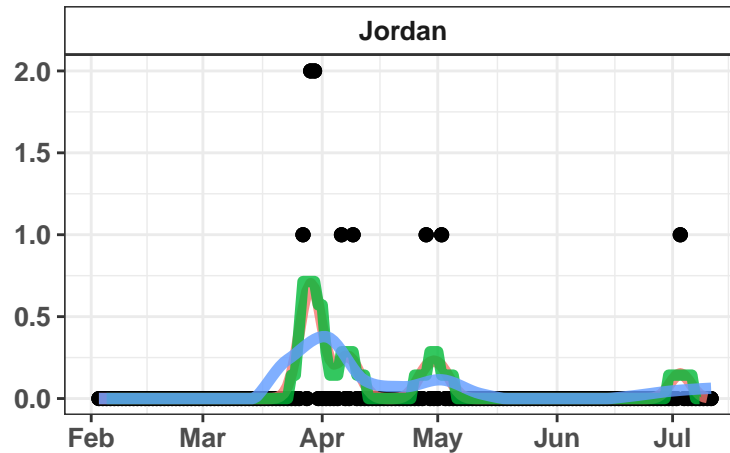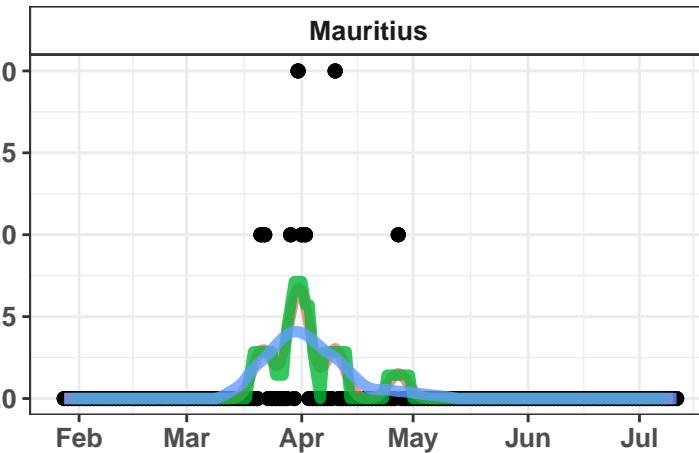

3 X 10 Day Rolling Average 7 Day Rolling Average Loess

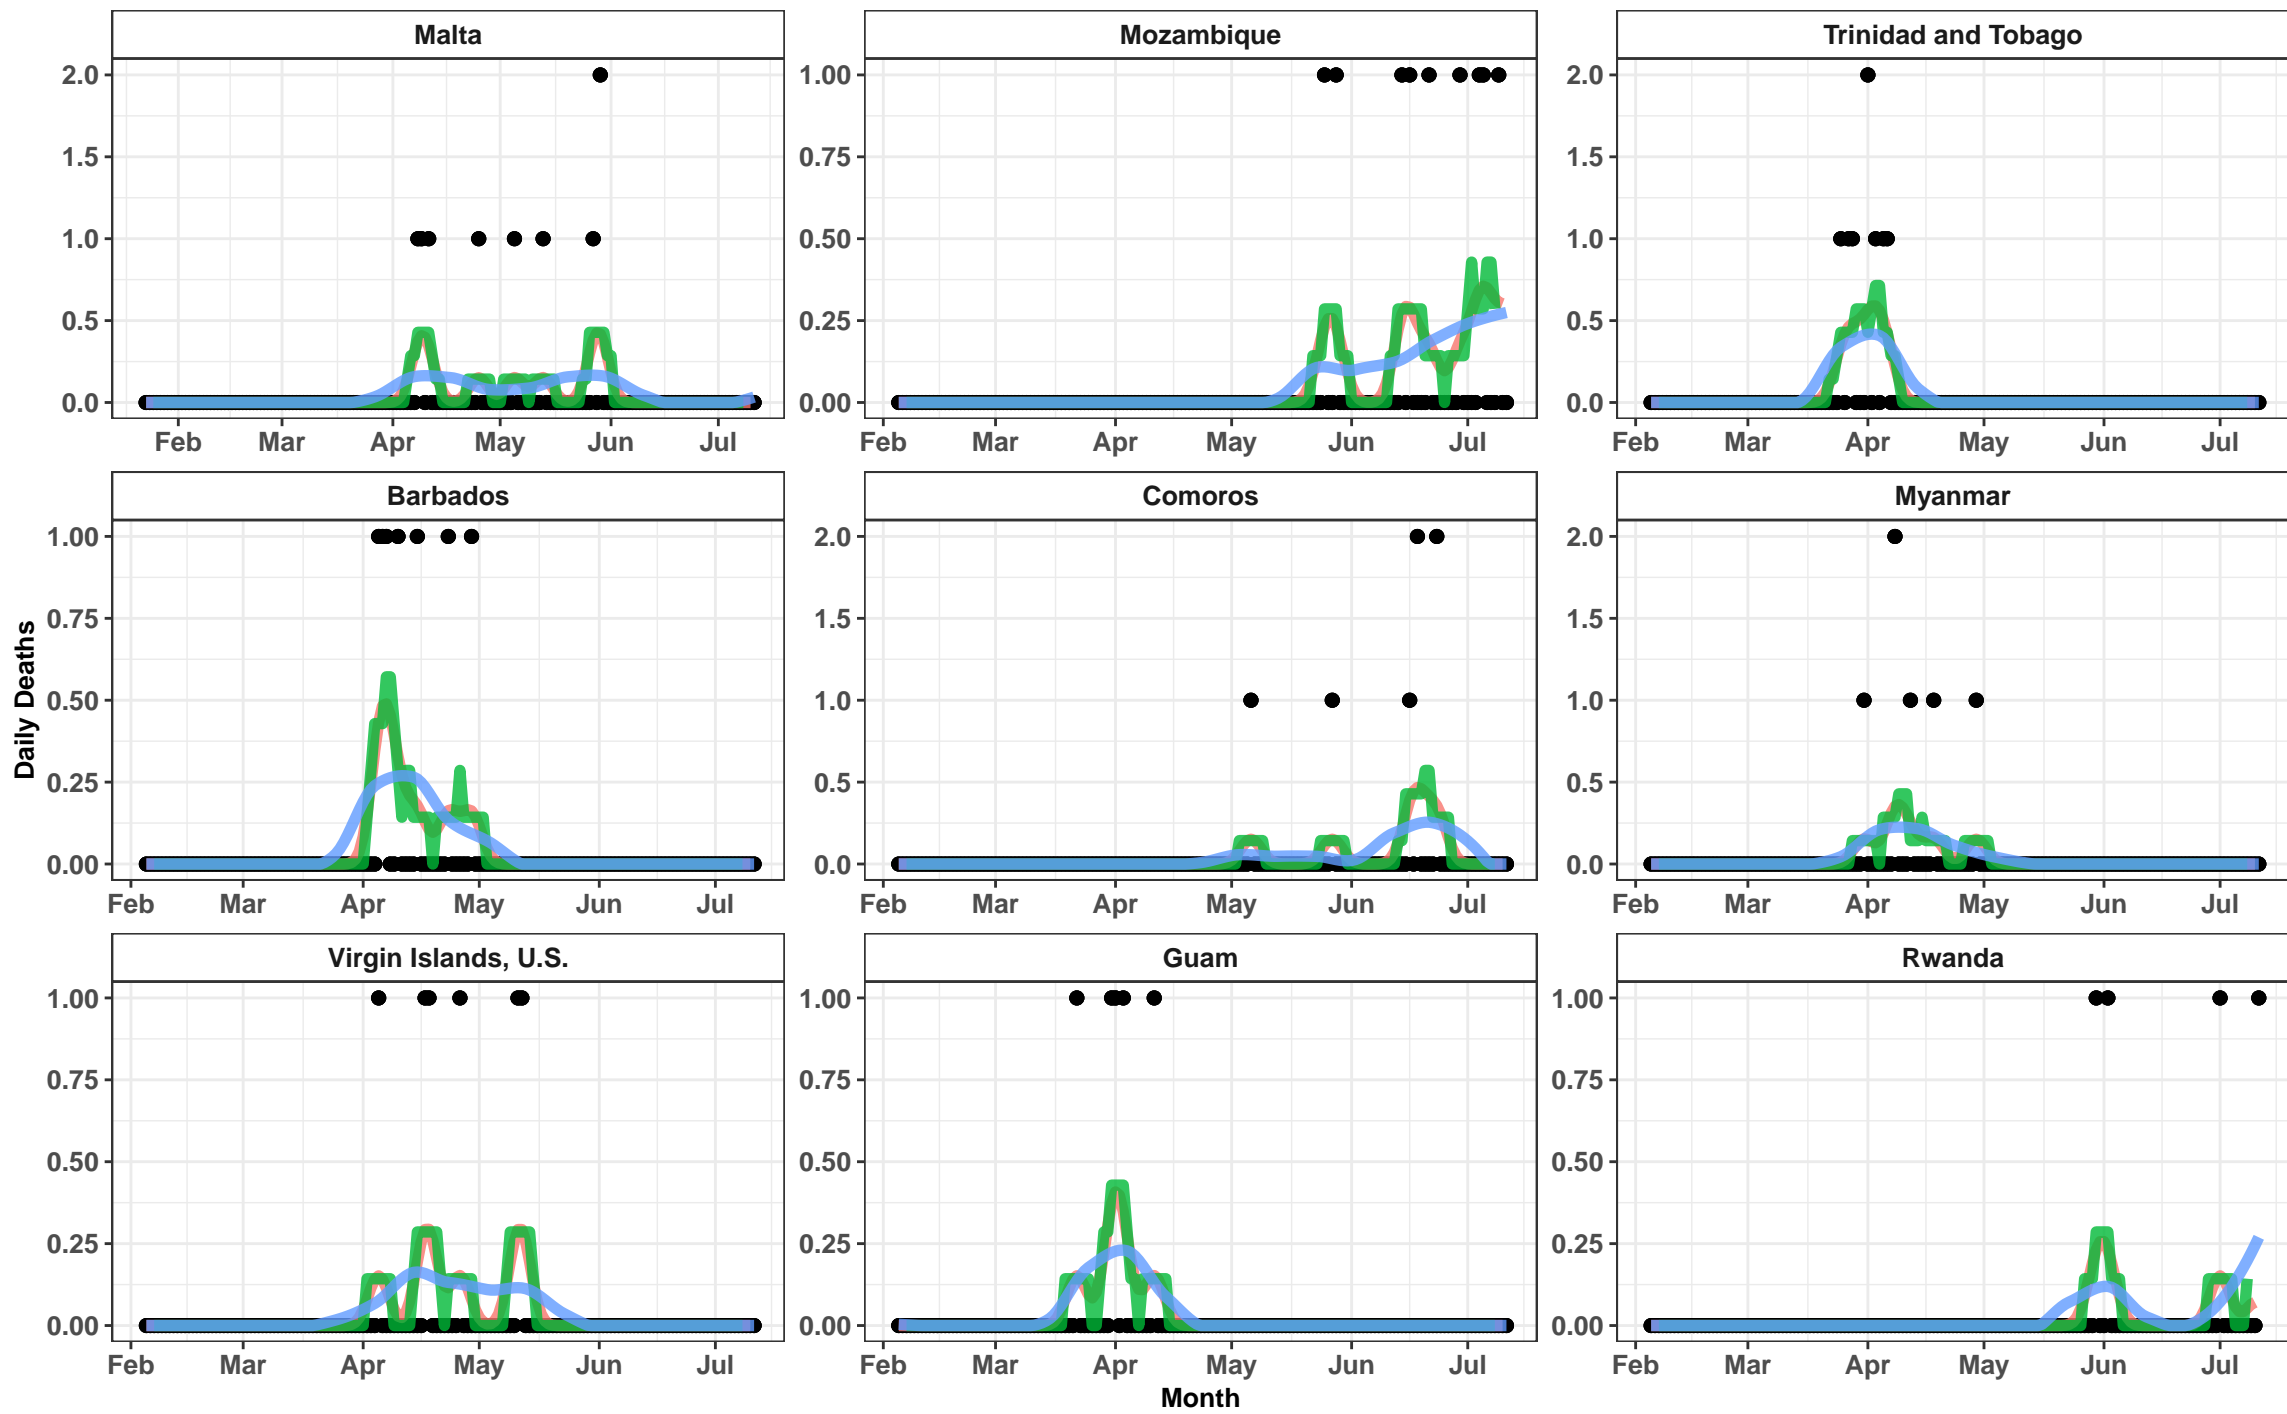

3 X 10 Day Rolling Average 7 Day Rolling Average Loess

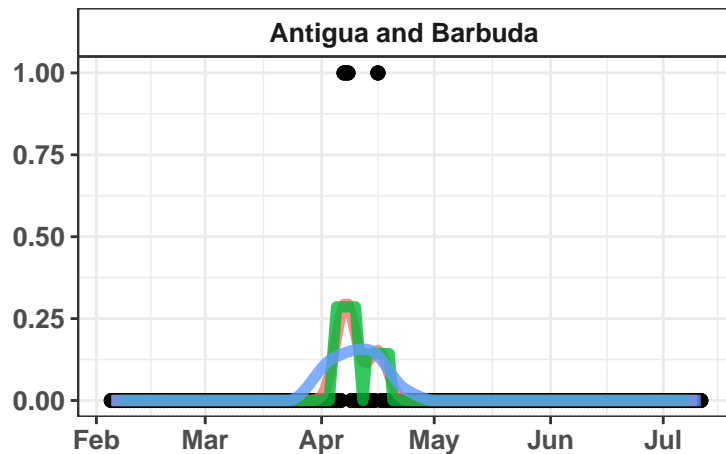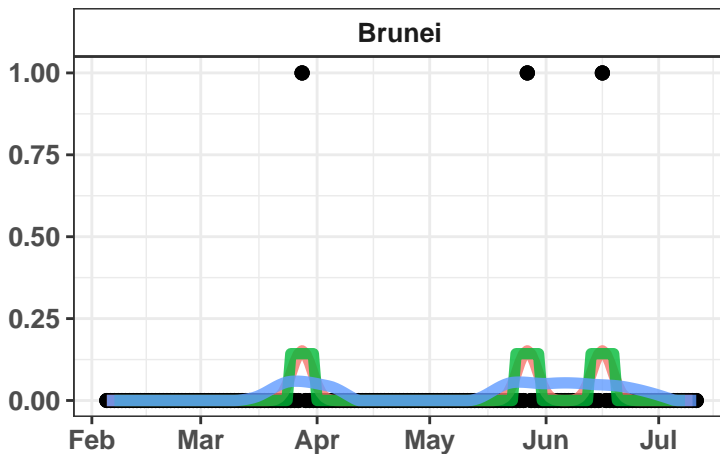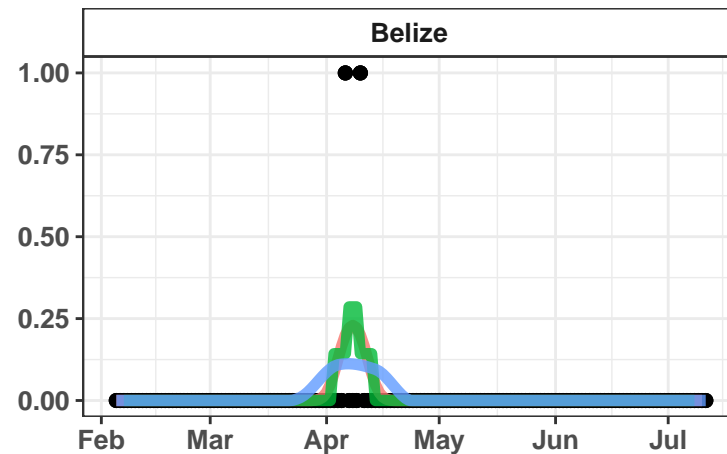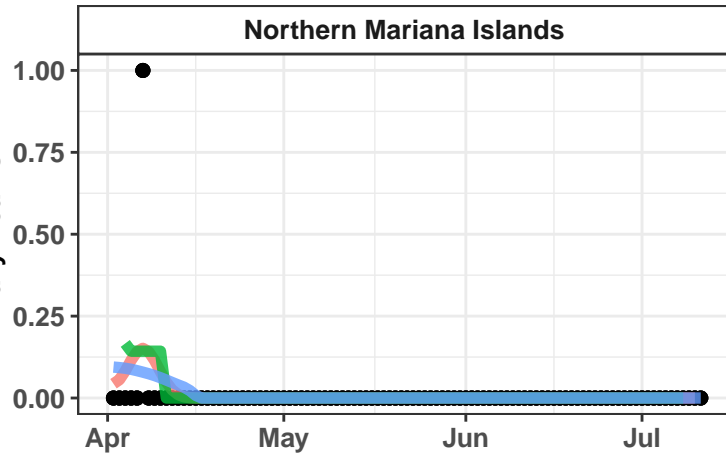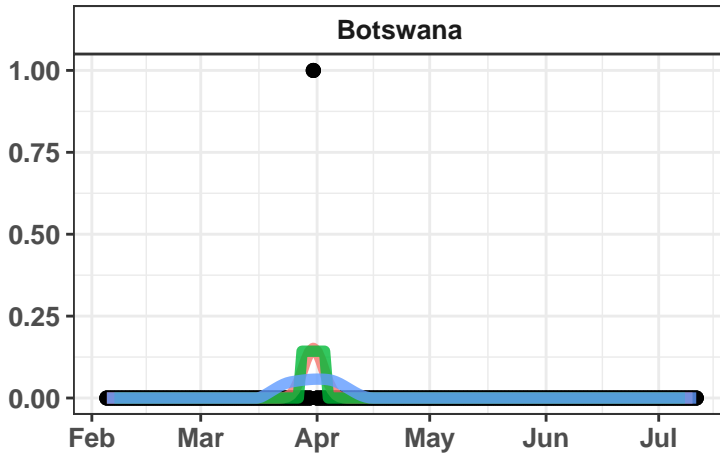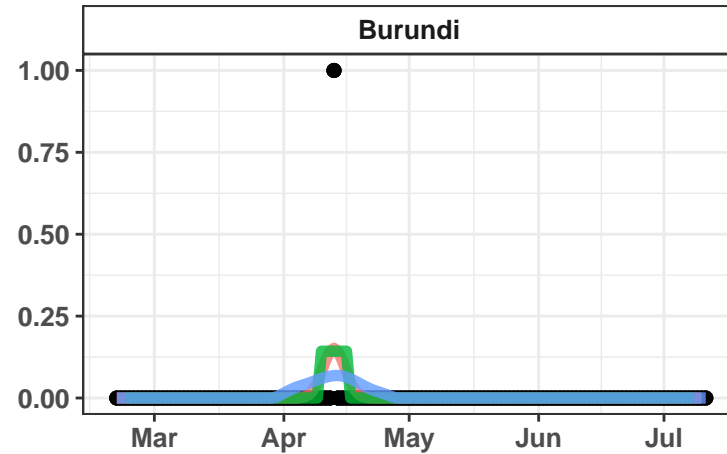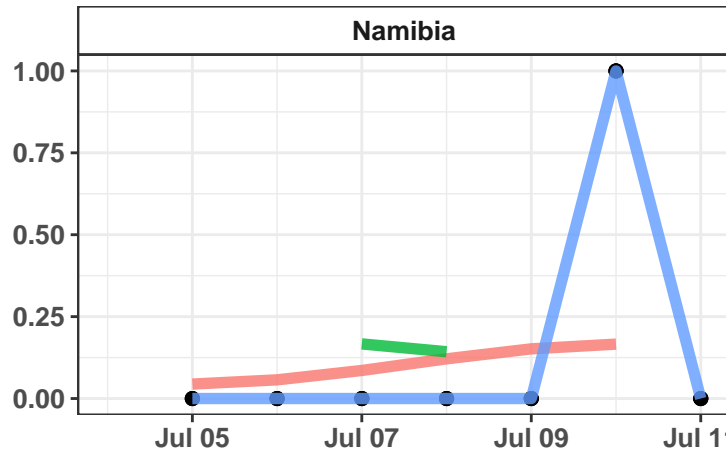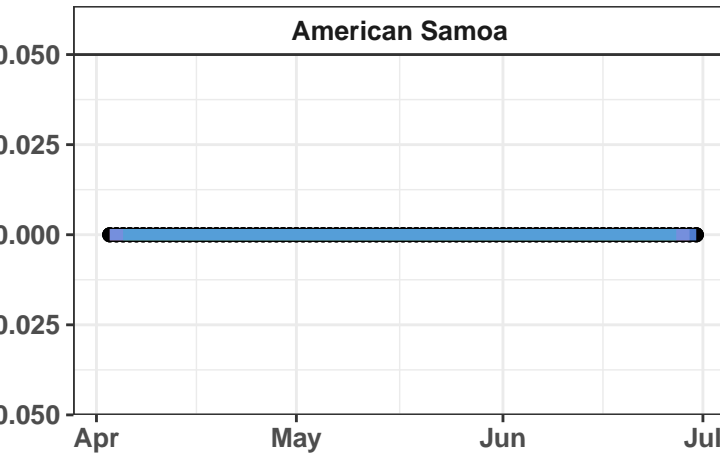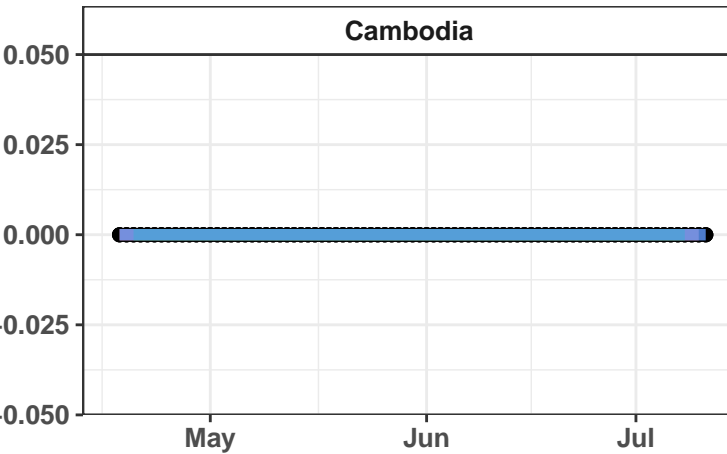



3 X 10 Day Rolling Average 7 Day Rolling Average Loess

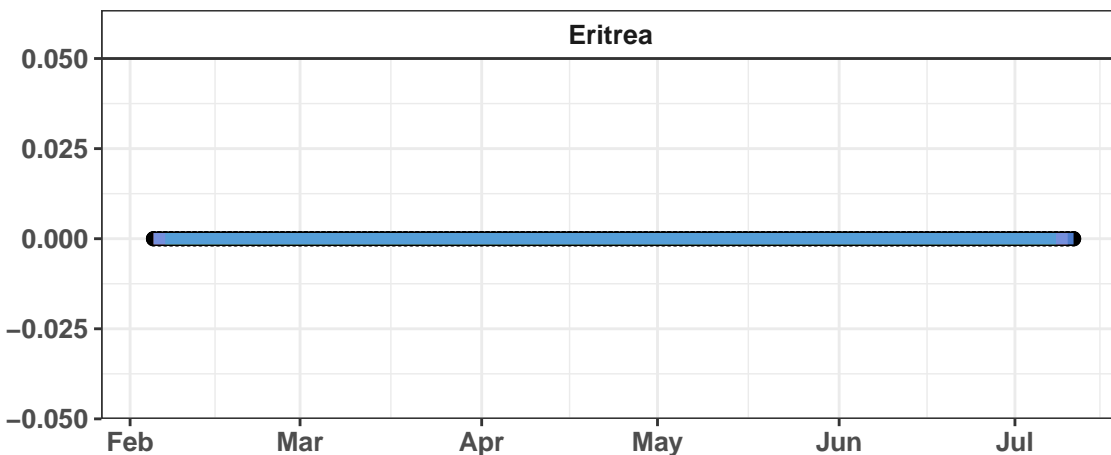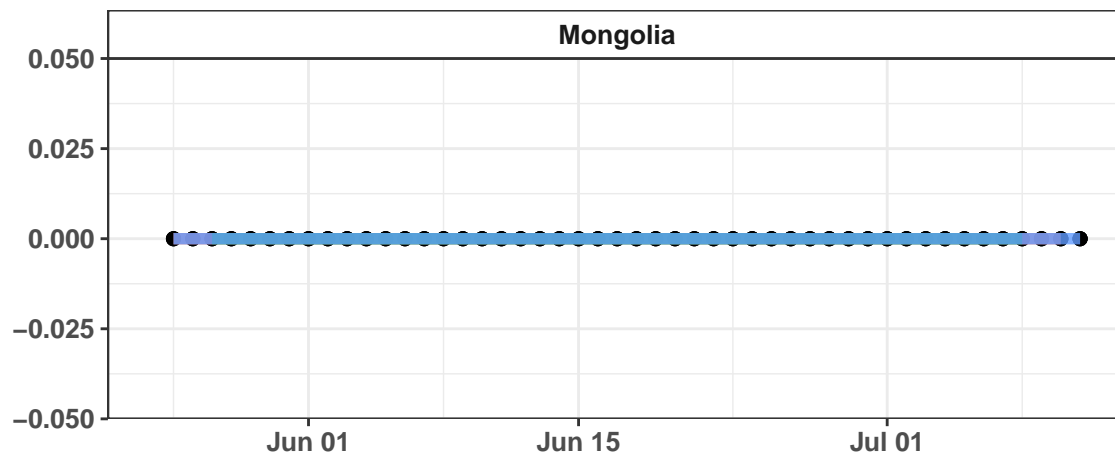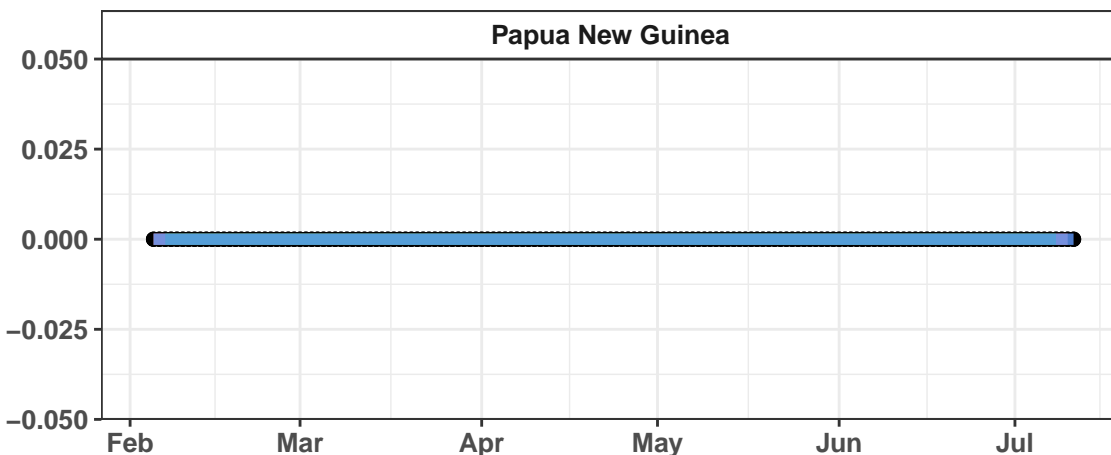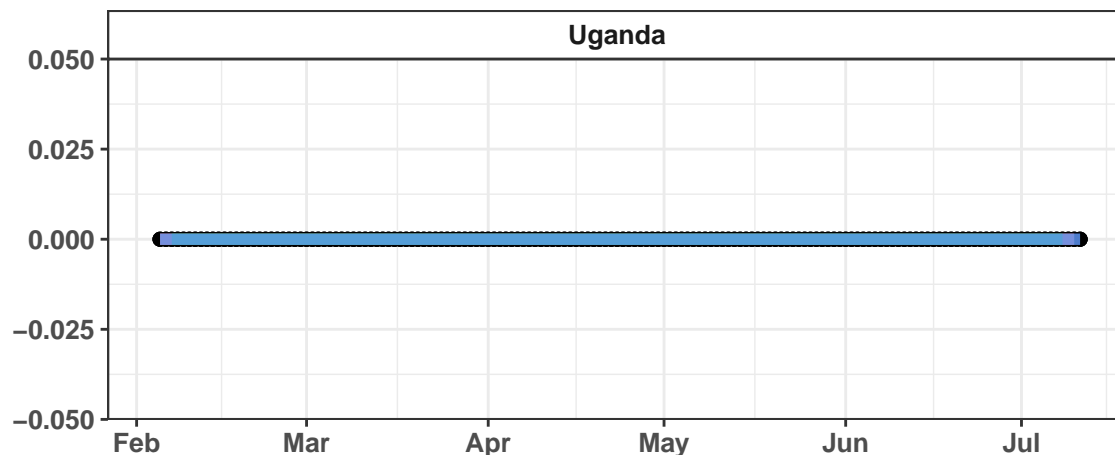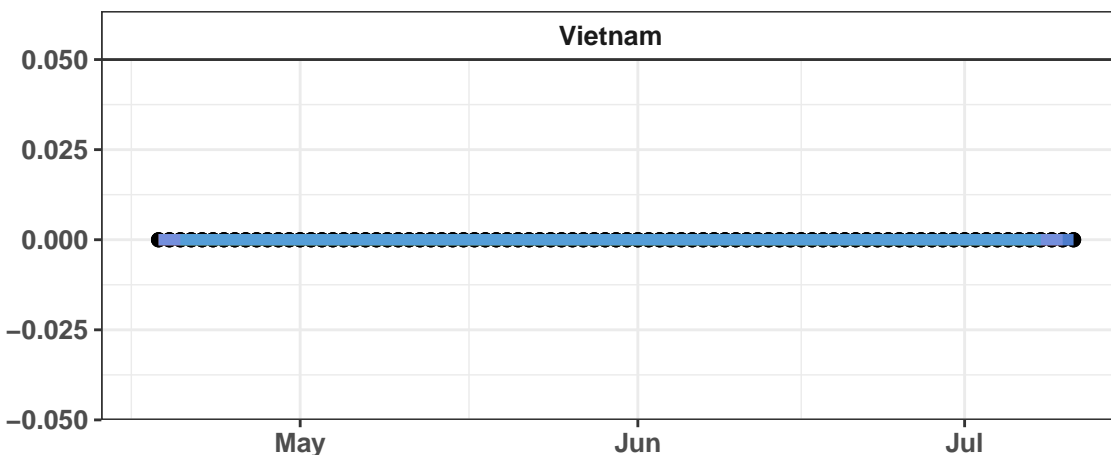

Month
